# Supplementary material for: Elucidating the Differentiation Synthesis Mechanisms of Differently Colored Resistance Quinoa Seedings Using Metabolite Profiling and Transcriptome Analysis
Source: MDPI journal article supplement (doi:10.3390/metabo13101065), 2023-10-10
Supplement: s1 [file s1]

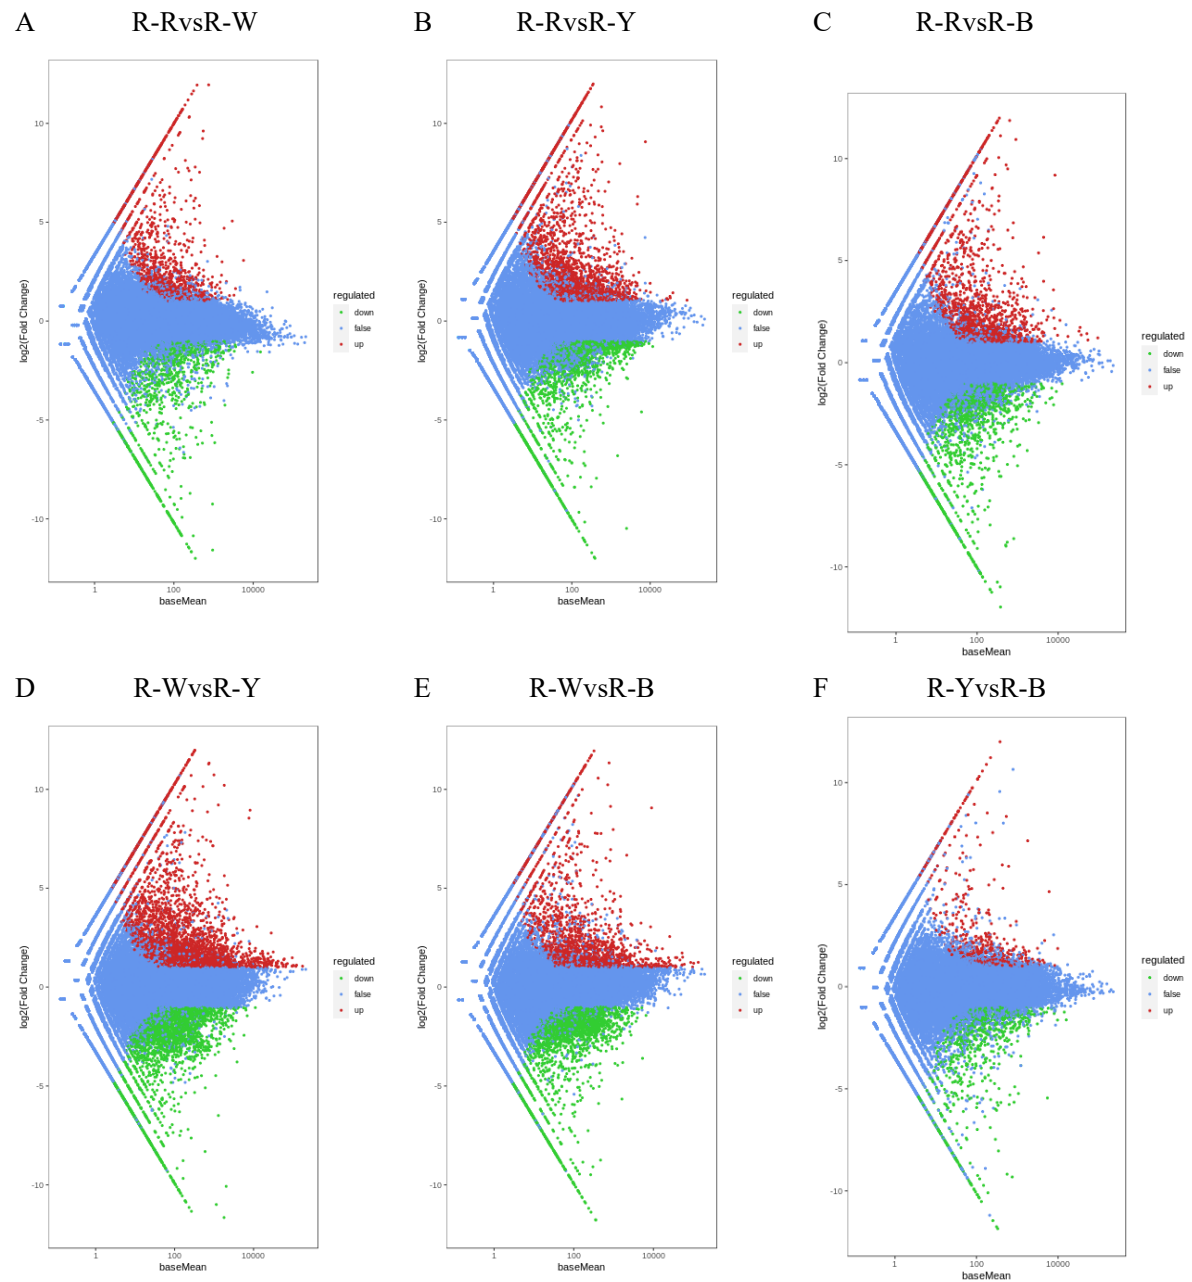

Figure S9 Differential gene MA map

Note: The vertical axis represents the log2FC value, representing the logarithmic value of the difference multiple (log2 Fold\_Change); The horizontal axis represents the average gene expression level between the two samples; The red dots represent an upregulation of gene expression, the green dots represent a downregulation, and the blue dots indicate no significant difference in gene expression.
