# Supplementary material for: Elucidating the Differentiation Synthesis Mechanisms of Differently Colored Resistance Quinoa Seedings Using Metabolite Profiling and Transcriptome Analysis
Source: MDPI journal article supplement (doi:10.3390/metabo13101065), 2023-10-10
Supplement: s1 [file s1]

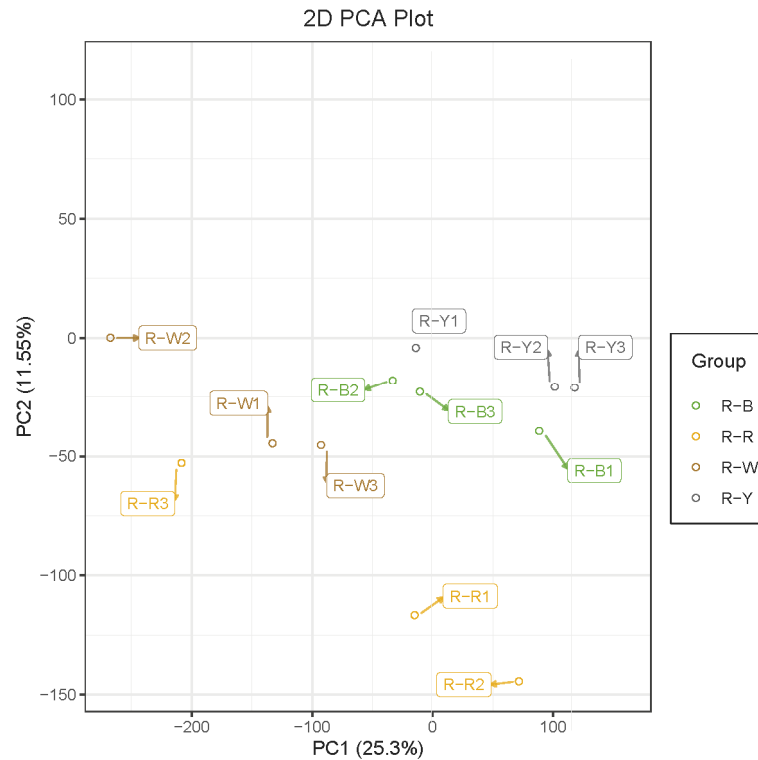

Figure S8 Principal component analysis PCA diagram

Note: PC1 represents the first principal component, PC2 represents the second principal component, and percentage represents the interpretation rate of this principal component to the dataset; Each point in the figure represents a sample, samples from the same group are represented by the same color, and Group represents the grouping.
