# Supplementary material for: Elucidating the Differentiation Synthesis Mechanisms of Differently Colored Resistance Quinoa Seedings Using Metabolite Profiling and Transcriptome Analysis
Source: MDPI journal article supplement (doi:10.3390/metabo13101065), 2023-10-10
Supplement: s1 [file s1]

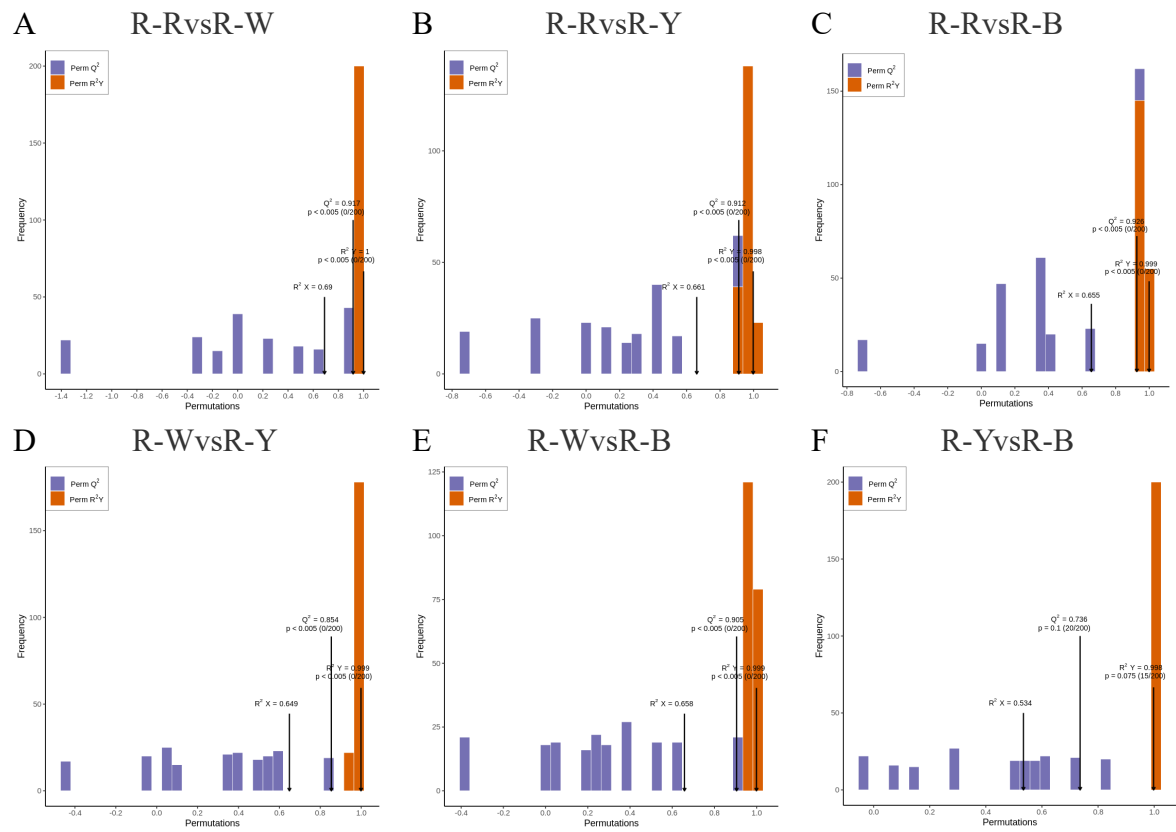

Figure S4 Corresponding group OPLS-DA simulation verification diagram

Note: The prediction parameters of the evaluation model include  $R^2X$ ,  $R^2Y$ , and  $Q^2$ , where  $R^2X$  and  $R^2Y$  represent the explanatory power of the constructed model to the X and Y matrices, and  $Q^2$  represents the predictive ability of the model. The closer these three indicators are to 1, the more stable and reliable the model is. When  $Q^2 > 0.5$ , it can be considered an effective model, and when  $Q^2 > 0.9$ , it is an excellent model.
