# Supplementary material for: Elucidating the Differentiation Synthesis Mechanisms of Differently Colored Resistance Quinoa Seedings Using Metabolite Profiling and Transcriptome Analysis
Source: MDPI journal article supplement (doi:10.3390/metabo13101065), 2023-10-10
Supplement: s1 [file s1]

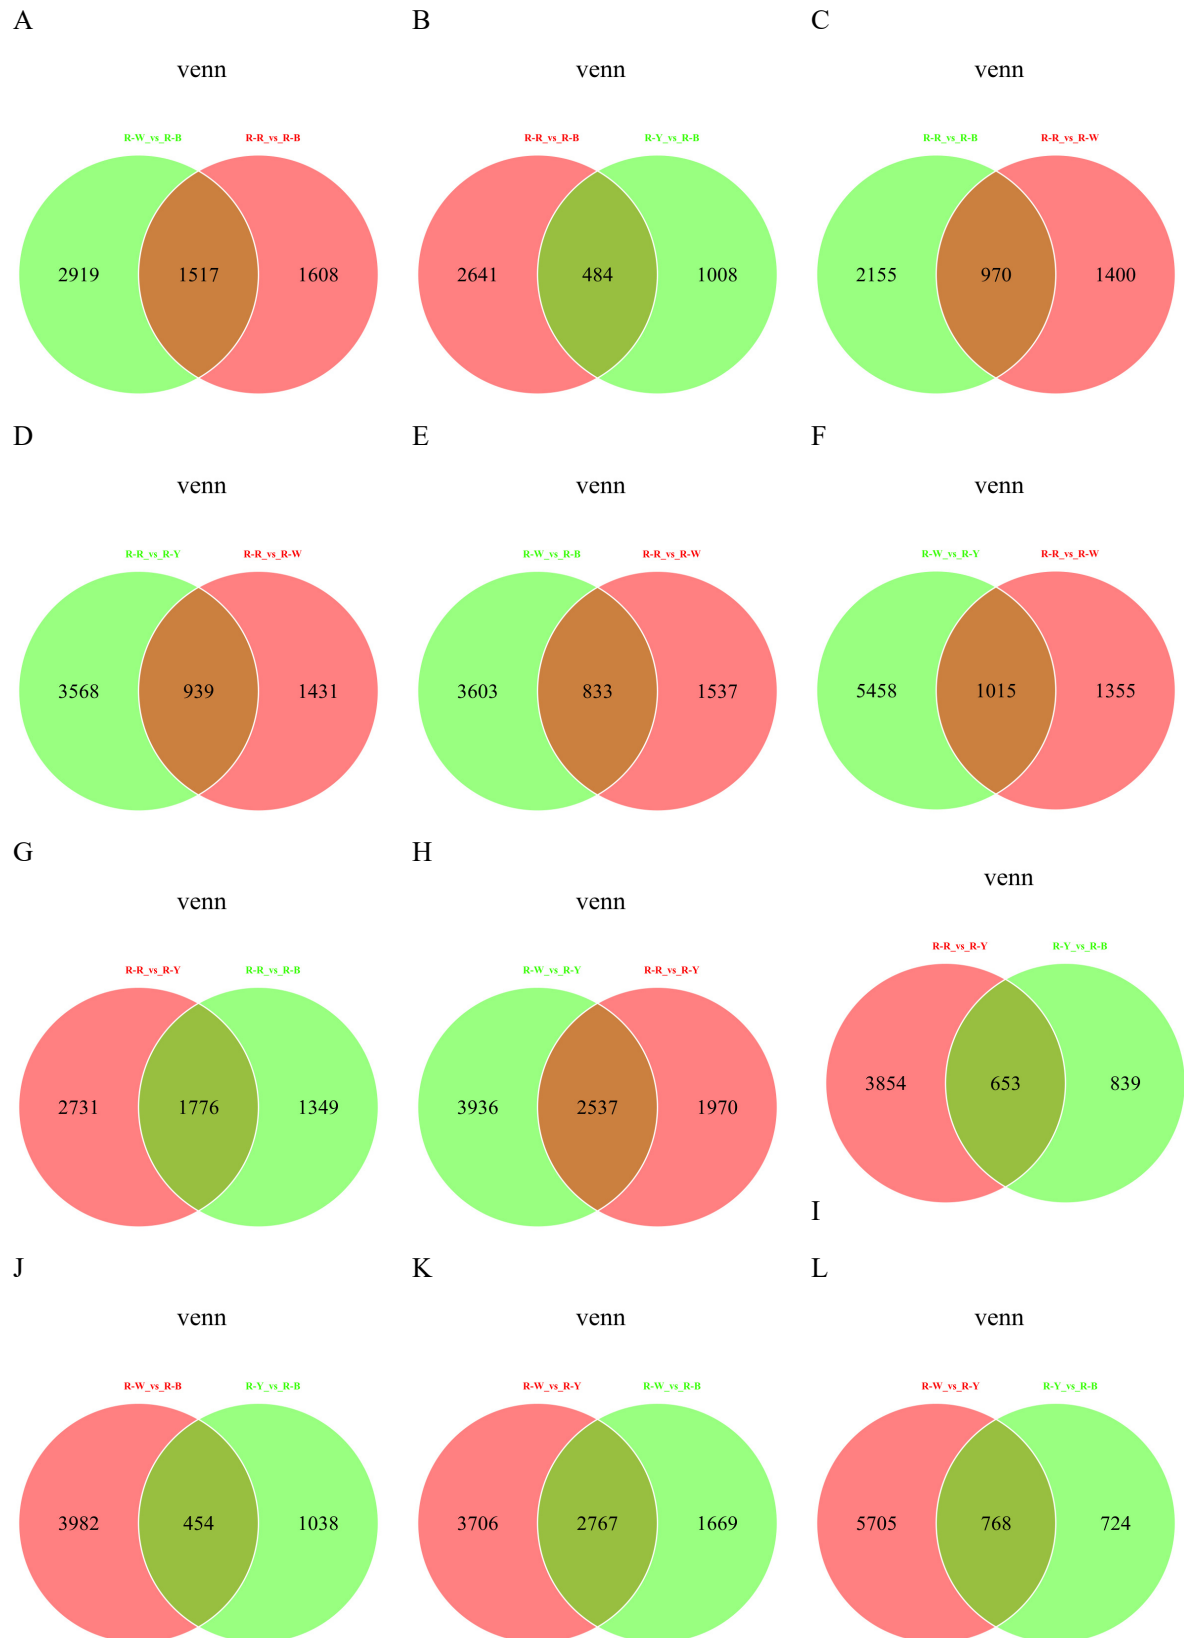

Figure S10 Venn map of differentially expressed genes in different groups

Note: The non-overlapping regions of the Venn map represent differential genes specific to that differential subgroup, and the overlapping regions represent differential genes common to several differential groups that overlap.
