# Supplementary material for: Elucidating the Differentiation Synthesis Mechanisms of Differently Colored Resistance Quinoa Seedings Using Metabolite Profiling and Transcriptome Analysis
Source: MDPI journal article supplement (doi:10.3390/metabo13101065), 2023-10-10
Supplement: s1 [file s1]

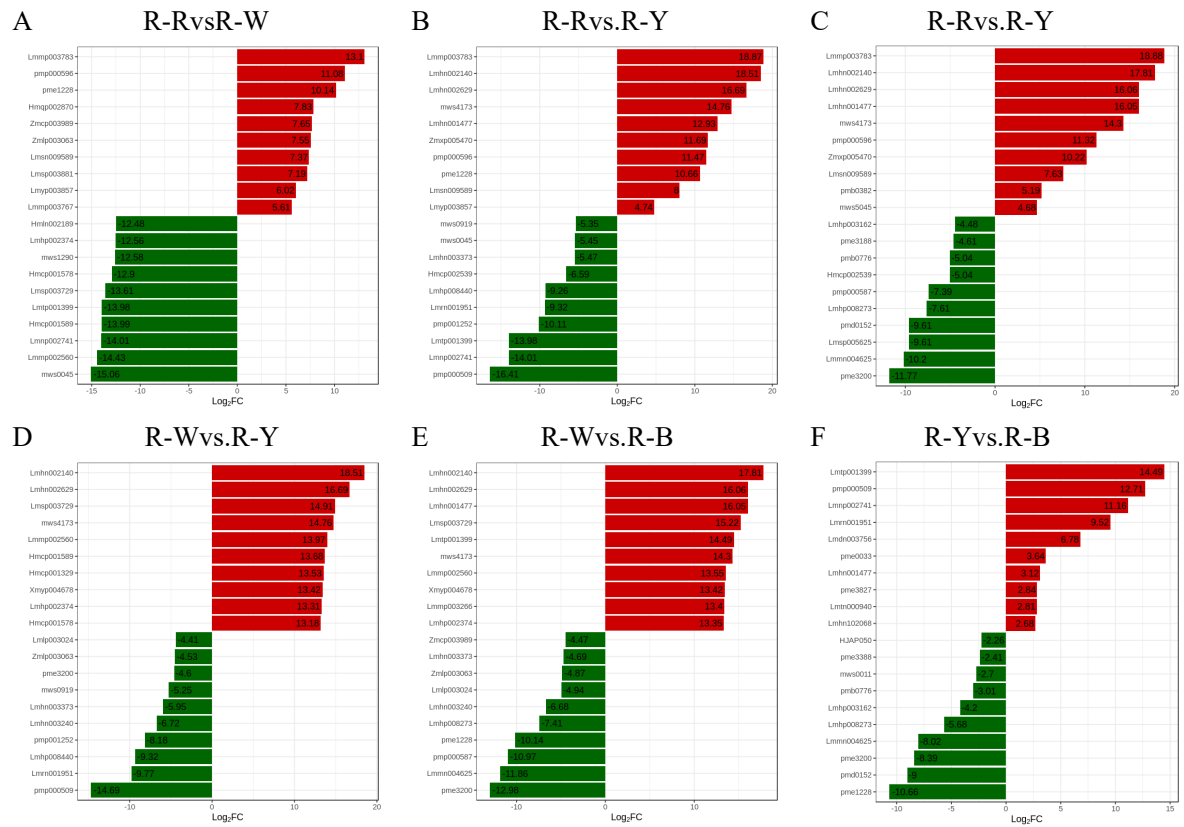

Figure S6 Difference multiple bar chart

Note: The horizontal axis represents the log<sub>2</sub>FC of differential metabolites, which is the logarithmic value of the difference multiple of differential metabolites with a base of 2. The vertical axis represents the differential metabolites. Red represents upregulated differentially expressed metabolites, while green represents downregulated differentially expressed metabolites.
