# Supplementary material for: Elucidating the Differentiation Synthesis Mechanisms of Differently Colored Resistance Quinoa Seedings Using Metabolite Profiling and Transcriptome Analysis
Source: MDPI journal article supplement (doi:10.3390/metabo13101065), 2023-10-10
Supplement: s1 [file s1]

A (N)

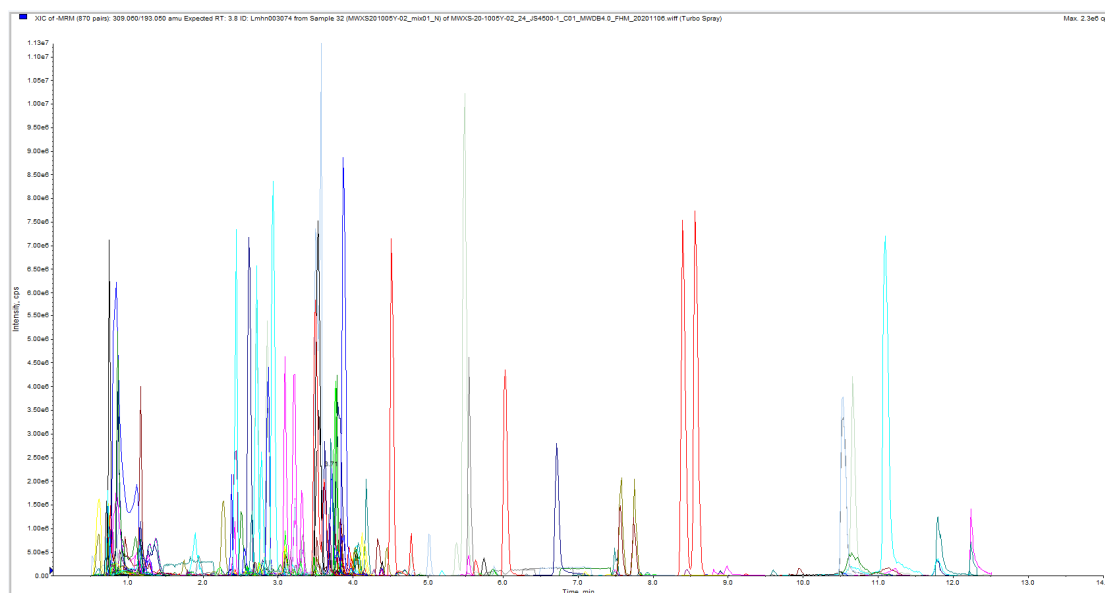

B (P)

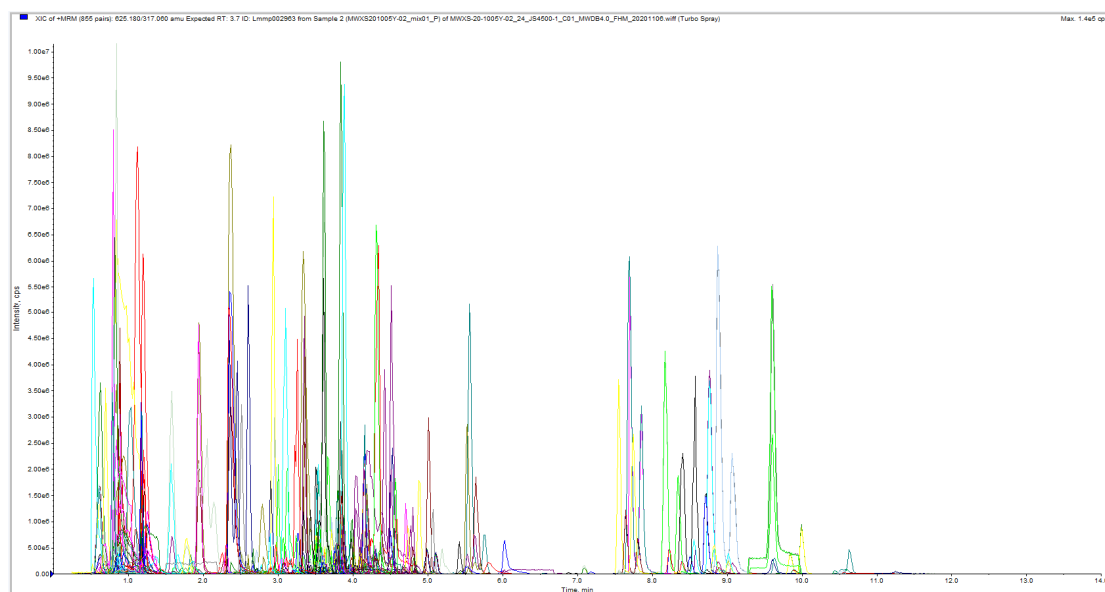

Figure S1 MRM metabolite detection multi peak plot

Note: N represents negative ion mode, P represents positive ion mode.
