# Supplementary material for: Elucidating the Differentiation Synthesis Mechanisms of Differently Colored Resistance Quinoa Seedings Using Metabolite Profiling and Transcriptome Analysis
Source: Metabolites. 2023 Oct 10;13(10):1065. doi: 10.3390/metabo13101065 (PMC10609267; doi:10.3390/metabo13101065)
Supplement: Supplementary file 1 [file metabolites-13-01065-s001.zip › Table S2.xlsx]

## Sheet: Sheet1
Table S2 All metabolites in R-RvsR-W
Index	Formula	Compounds	Class I	Class II	CAS	Level	R-R1	R-R2	R-R3	R-W1	R-W2	R-W3	VIP	Fold_Change	Log2FC	Type
pme3200	C2H7N3	1-methylguanidine	Nucleotides and derivatives	Nucleotides and derivatives	471-29-4	B	40113	27467	26454	51021	107940	59709	1.3542	2.32544	1.2175	up
pmb0782	C5H11N	Piperidine	Alkaloids	Alkaloids	110-89-4	B	4880600	4785100	4760100	5483200	5731700	5319500	1.52736	1.14617	0.196819	insig
pme2292	C4H12N2	Putrescine	Alkaloids	Phenolamine	110-60-1	B	103760	37011	52903	48504	96358	91373	0.505243	1.21976	0.286592	insig
pme1987	C3H7NO2	L-Alanine	Amino acids and derivatives	Amino acids and derivatives	56-41-7	B	3594.6	3233.3	2721.7	2453.9	1461.1	9	0.86396	0.410907	-1.28312	insig
ML10198895	C3H7NO2	N-Methylglycine	Amino acids and derivatives	Amino acids and derivatives	107-97-1	B	20050	12981	20779	18272	17112	15463	0.198761	0.944936	-0.0817116	insig
pme2601	C3H6O3	3-Hydroxypropanoic acid	Organic acids	Organic acids	503-66-2	B	36558	45190	35952	40550	35778	37515	0.282932	0.96723	-0.0480687	insig
Lmqp000873	C4H4O3	Succinic anhydride	Organic acids	Organic acids	108-30-5	B	1886700	2048100	1465100	1569800	1878200	1029700	0.716167	0.829219	-0.270175	insig
mws4052	C4H7NO2	1-Aminocyclopropane-1-carboxylic acid	Organic acids	Organic acids	22059-21-8	B	504300	559760	531010	513680	509830	503570	0.906297	0.957375	-0.0628441	insig
pme1841	C5H14N2	Cadaverine	Alkaloids	Phenolamine	462-94-2	B	7716.9	4021.6	4593.8	16163	12261	13391	1.46047	2.56026	1.35629	up
pme3011	C4H9NO2	γ-Aminobutyric acid	Organic acids	Organic acids	56-12-2	B	405570	412670	524620	258700	177180	523680	0.895305	0.714564	-0.484864	insig
pme3017	C4H9NO2	2-Aminoisobutyric acid	Amino acids and derivatives	Amino acids and derivatives	62-57-7	B	3700300	1767500	3457100	2459900	4501300	3770400	0.529694	1.20243	0.265957	insig
pme3033	C4H9NO2	N,N-Dimethylglycine	Amino acids and derivatives	Amino acids and derivatives	1118-68-9	B	468520	296270	422150	273810	358230	508180	0.193144	0.960638	-0.0579348	insig
pmb0484	C5H13NO	Choline	Alkaloids	Alkaloids	62-49-7	B	26383000	16152000	25387000	20851000	28952000	26763000	0.546291	1.12726	0.172825	insig
ML10172161	C3H4O4	Hydroxypyruvic acid	Organic acids	Organic acids	1113-60-6	B	238970	294320	325860	450760	309490	359050	1.0757	1.3028	0.381615	insig
mws0576	C4H8O3	3-Hydroxybutyric acid	Organic acids	Organic acids	300-85-6	B	271270	255410	291200	363730	511230	369670	1.40631	1.52178	0.605756	insig
mws0574	C4H8O3	2-Hydroxyisobutyric acid	Organic acids	Organic acids	594-61-6	A	2085100	1972300	2426200	2193400	1799900	1954900	0.743259	0.917422	-0.124342	insig
pme1975	C3H4O4	Malonic acid	Organic acids	Organic acids	141-82-2	B	980330	1058500	866560	1278300	1122300	1243700	1.35993	1.25432	0.32691	insig
pme0048	C2H7NO2S	2-Aminoethanesulfinic acid	Organic acids	Organic acids	300-84-5	B	4818.7	4770.9	2181.3	2579.2	4147.2	2839.5	0.421766	0.812674	-0.299252	insig
mws0255	C4H5N3O	Cytosine	Nucleotides and derivatives	Nucleotides and derivatives	71-30-7	B	10215000	4088000	4845300	2021600	4700000	3757000	0.972439	0.547234	-0.86977	insig
pme0257	C4H4N2O2	Uracil	Nucleotides and derivatives	Nucleotides and derivatives	66-22-8	A	99523	135080	124040	194460	158830	94021	0.593138	1.24723	0.31873	insig
pme0006	C5H9NO2	L-Proline	Amino acids and derivatives	Amino acids and derivatives	147-85-3	B	32596000	38238000	37415000	41086000	39304000	32844000	0.403973	1.04605	0.0649535	insig
mws0376	C4H4O4	Fumaric acid	Organic acids	Organic acids	110-17-8	B	76850	54933	48050	55745	194640	54204	0.616048	1.69373	0.760206	insig
pme0275	C5H8O3	4-Oxopentanoic Acid	Organic acids	Organic acids	123-76-2	B	15288	11050	11861	12744	16422	13079	0.612715	1.10592	0.145246	insig
mws0823	C5H8O3	3-Methyl-2-Oxobutanoic acid	Organic acids	Organic acids	759-05-7	B	81993	69378	71250	52394	96473	55644	0.443906	0.918651	-0.122411	insig
pme3193	C4H7NO3	N-Acetyl-L-glycine	Amino acids and derivatives	Amino acids and derivatives	543-24-8	B	6827.4	7085.4	6837.7	10101	11138	12680	1.55144	1.63461	0.708948	insig
pmb1096	C8H7N	Indole	Alkaloids	Plumerane	120-72-9	A	7842.8	6569.1	8157.9	7706.1	13699	7964.3	0.829604	1.30127	0.37992	insig
pme0120	C5H11NO2	5-Aminovaleric acid	Amino acids and derivatives	Amino acids and derivatives	660-88-8	B	11353	13196	19028	15355	10727	21564	0.219468	1.09337	0.128788	insig
mws0256	C5H11NO2	L-Valine	Amino acids and derivatives	Amino acids and derivatives	72-18-4	B	9042800	8205800	8289900	10885000	11259000	8864000	1.22479	1.21417	0.279967	insig
mws0191	C5H11NO2	Betaine	Alkaloids	Alkaloids	107-43-7	A	639970	599310	492180	550390	637050	580780	0.230767	1.02123	0.0303087	insig
pme1730	C4H6O4	D-Erythronolactone	Organic acids	Organic acids	15667-21-7	B	491170	710690	592100	967580	687280	592580	0.821666	1.25278	0.325135	insig
mws0470	C4H6O4	Methylmalonic acid*	Organic acids	Organic acids	516-05-2	A	6884400	6470900	4624700	4568000	5707200	3391100	0.933741	0.760083	-0.39577	insig
mws0192	C4H6O4	Succinic acid*	Organic acids	Organic acids	110-15-6	A	7066100	6749400	4639800	4880100	5825000	3277100	0.885327	0.757625	-0.400444	insig
mws0147	C5H10O3	β-Hydroxyisovaleric acid	Organic acids	Organic acids	625-08-1	B	810820	522520	694190	319050	753490	524140	0.707521	0.7875	-0.344648	insig
pme3096	C3H5NO4	Aminomalonic acid	Organic acids	Organic acids	1068-84-4	B	5923700	5677100	3978800	4146300	5054000	2957600	0.856835	0.780373	-0.357764	insig
mws0230	C4H9NO3	L-Threonine	Amino acids and derivatives	Amino acids and derivatives	72-19-5	B	1410600	1338700	1384900	1531000	1494400	1339600	0.827017	1.05583	0.0783735	insig
pmp001287	C8H9N	N-Benzylmethylene isomethylamine	Alkaloids	Alkaloids	-	A	5425000	5407500	6056600	8136600	7963800	6429500	1.38626	1.33399	0.415748	insig
pma0134	C4H8O4	D-(-)-Threose	Others	Saccharides and Alcohols	95-43-2	B	65541	52116	53302	97315	213870	142120	1.43909	2.65154	1.40683	up
pme0195	C3H7NO2S	L-Cysteine	Amino acids and derivatives	Amino acids and derivatives	52-90-4	B	5236.7	8736.4	7644.7	9447.8	8132.6	4347.5	0.0338461	1.01434	0.0205479	insig
pmb0069	C7H7NO	Benzamide	Phenolic acids	Phenolic acids	55-21-0	B	31712000	30514000	33033000	45586000	93791000	74501000	1.41516	2.24523	1.16686	up
mws0491	C8H11N	Phenethylamine	Alkaloids	Alkaloids	64-04-0	A	10039000	9352500	10438000	14804000	41514000	29508000	1.37463	2.87722	1.52467	up
pme0241	C7H6O2	Benzoic acid	Phenolic acids	Phenolic acids	65-85-0	B	33194	25686	23205	31569	18646	18529	0.71896	0.837473	-0.255885	insig
Lmbn001930	C7H6O2	2-Hydroxybenzaldehyde (Salicylaldehyde)	Phenolic acids	Phenolic acids	90-02-8	B	51779	36896	53394	35318	47550	41917	0.617783	0.878341	-0.187147	insig
mws0628	C7H6O2	4-Hydroxybenzaldehyde	Phenolic acids	Phenolic acids	123-08-0	B	228390	193360	299920	357620	481620	308800	1.27057	1.59081	0.669762	insig
mws0133	C6H6N2O	Nicotinamide	Others	Vitamin	98-92-0	A	2351200	3225100	2312900	2706700	2643100	2463000	0.0212385	0.990316	-0.0140393	insig
ML10179289	C8H10O	2-Phenylethanol	Phenolic acids	Phenolic acids	60-12-8	B	19580000	18542000	21317000	29372000	71299000	52099000	1.39342	2.5702	1.36188	up
pme1216	C6H5NO2	2-Picolinic acid	Organic acids	Organic acids	98-98-6	B	429770	120240	163300	110440	190210	273540	0.225426	0.804966	-0.313001	insig
Lmbp000668	C6H5NO2	Isonicotinic acid	Organic acids	Organic acids	55-22-1	B	722860	262460	320070	230270	452370	595210	0.0114457	0.978903	-0.0307624	insig
pme0490	C6H5NO2	Nicotinic acid (Vitamin B3)	Others	Vitamin	59-67-6	B	722890	236320	322320	223470	442580	603040	0.04554	0.990293	-0.0140729	insig
mws0566	C7H8O2	4-Methylcatechol	Phenolic acids	Phenolic acids	452-86-8	B	356.62	359.95	710.25	1091.9	353.63	359.07	0.237993	1.26477	0.338876	insig
pmb0302	C2H8NO3P	2-Aminoethylphosphonate	Lipids	Glycerol ester	2041-14-7	B	11263	16312	13654	29612	14802	20238	1.07958	1.56812	0.649036	insig
pmp001086	C6H6O3	5-Hydroxymethylfurfural	Phenolic acids	Phenolic acids	67-47-0	B	36692	62071	42636	91684	55772	61483	1.06828	1.47766	0.56331	insig
NK10264324	C6H6O3	1,3,5-Benzenetriol	Phenolic acids	Phenolic acids	108-73-6	B	36333	24642	23252	43819	18968	34375	0.260659	1.15357	0.206109	insig
pmp000509	C6H6O3	Maltol	Others	Others	118-71-8	B	804920	702230	841980	196710	243050	274520	1.57833	0.304062	-1.71756	down
mws0251	C5H6N2O2	Thymine	Nucleotides and derivatives	Nucleotides and derivatives	65-71-4	B	17537	12692	18300	16463	18658	15915	0.379781	1.05166	0.0726681	insig
Lmbn000612	C5H7NO3	1-Pyrroline-4-hydroxy-2-carboxylic acid	Organic acids	Organic acids	9054-77-7	B	1625.7	3841.2	886.43	2756.3	2473.7	3909.6	0.813215	1.43855	0.524618	insig
mws0263	C5H7NO3	5-Oxo-L-Proline	Amino acids and derivatives	Amino acids and derivatives	98-79-3	A	4507.1	9	3025.4	2509.7	4978.6	9147.4	0.774064	2.20589	1.14136	insig
ML10181668	C6H11NO2	Cycloleucine*	Amino acids and derivatives	Amino acids and derivatives	52-52-8	B	16591000	11536000	11441000	19142000	17673000	22849000	1.31363	1.50789	0.592527	insig
Rfmb319	C6H11NO2	Pipecolic acid*	Amino acids and derivatives	Amino acids and derivatives	4043-87-2	B	5718100	2988100	3271300	6226800	5548100	7064000	1.1964	1.57286	0.653388	insig
mws0425	C5H6O4	Citraconic acid	Organic acids	Organic acids	498-23-7	B	26445	40159	35383	38235	44718	24979	0.179757	1.05829	0.0817374	insig
Zmpn000638	C4H9N3O2	3-Guanidinopropionic acid	Organic acids	Organic acids	353-09-3	B	41840	35150	29790	24018	25400	35769	0.957428	0.79778	-0.325936	insig
pmp001198	C6H13NO2	6-Deoxyfagomine	Alkaloids	Alkaloids	197449-09-5	A	6301900	5795300	5898700	7063200	7673900	6800100	1.44721	1.19678	0.259162	insig
pme0274	C6H13NO2	6-Aminocaproic acid	Organic acids	Organic acids	60-32-2	B	680360	535340	514030	623940	535450	457920	0.433071	0.935007	-0.0969506	insig
mws0227	C6H13NO2	L-Leucine*	Amino acids and derivatives	Amino acids and derivatives	61-90-5	A	1272600	1279000	1203100	1473800	1504700	1294900	1.26105	1.13815	0.186687	insig
mws0258	C6H13NO2	L-Isoleucine*	Amino acids and derivatives	Amino acids and derivatives	73-32-5	A	1288900	1208000	1199100	1444100	1572700	1367700	1.4136	1.18628	0.246448	insig
pme3034	C5H8O4	Ethylmalonic acid	Organic acids	Organic acids	601-75-2	B	32451	22933	30183	14687	31307	12320	0.950903	0.681501	-0.553212	insig
pme0243	C5H8O4	Glutaric acid	Organic acids	Organic acids	110-94-1	B	788680	520480	657540	407000	763800	429250	0.704285	0.813571	-0.29766	insig
Lmmn000806	C5H8O4	Dimethylmalonic acid*	Organic acids	Organic acids	595-46-0	A	247070	153190	303940	78772	191830	115240	1.09951	0.547915	-0.867975	insig
Lmbn001364	C5H8O4	4-Hydroxy-2-Oxopentanoic Acid*	Organic acids	Organic acids	3318-73-8	B	235720	162150	296620	79721	187120	116750	1.13944	0.552335	-0.856385	insig
Lmbn001288	C5H8O4	2-Hydroxy-2-methyl-3-oxobutanoic acid*	Organic acids	Organic acids	71698-08-3	B	245470	164060	290430	81397	176890	127320	1.1758	0.550899	-0.860141	insig
mws0473	C5H8O4	2-Methylsuccinic acid*	Organic acids	Organic acids	498-21-5	A	2716800	1822800	3148700	952970	2243900	1365600	1.08622	0.59343	-0.75285	insig
Lmgn000160	C4H8N2O3	3-Ureidopropionic Acid	Organic acids	Organic acids	462-88-4	B	21380	16510	13039	21395	23378	24393	1.18306	1.35809	0.441576	insig
Lmrn002746	C6H12O3	2-Hydroxy-4-methylpentanoic acid	Organic acids	Organic acids	498-36-2	A	89688	117230	135640	29228	39550	38748	1.54522	0.313891	-1.67166	down
mws0341	C6H12O3	2-Hydroxyisocaproic acid	Organic acids	Organic acids	20312-37-2	A	90397	29337	55432	9374.7	22492	56338	0.909443	0.503549	-0.989795	insig
mws0972	C6H12O3	6-Hydroxyhexanoic acid	Organic acids	Organic acids	1191-25-9	A	258380	258080	309670	387080	354670	678690	1.22207	1.71939	0.781897	insig
pme2527	C5H12N2O2	L-Ornithine	Amino acids and derivatives	Amino acids and derivatives	70-26-8	B	39404	43599	46753	27232	38732	45651	0.740025	0.860191	-0.21727	insig
mws0219	C4H7NO4	L-Aspartic Acid	Amino acids and derivatives	Amino acids and derivatives	56-84-8	A	19381000	17446000	15488000	15376000	17976000	14348000	0.708437	0.911784	-0.133235	insig
mws0275	C4H6O5	L-Malic acid*	Organic acids	Organic acids	97-67-6	A	42176000	41204000	23845000	24547000	54476000	17363000	0.371629	0.898913	-0.153746	insig
Lmbn000198	C4H6O5	3-Dehydro-L-Threonic Acid*	Organic acids	Organic acids	-	A	15805000	12218000	9319800	8059700	16166000	6797100	0.564018	0.830757	-0.267501	insig
pmb0374	C5H5N5	2-Aminopurine	Nucleotides and derivatives	Nucleotides and derivatives	452-06-2	A	50306	29486	75818	94635	432720	308470	1.33851	5.37128	2.42527	up
pme0040	C5H5N5	Adenine	Nucleotides and derivatives	Nucleotides and derivatives	73-24-5	A	70529000	27141000	49927000	10931000	31275000	37704000	0.918006	0.541407	-0.885215	insig
HJKP000649	C8H9NO	N-benzylformamide	Alkaloids	Alkaloids	6343-54-0	B	1944100	1627700	1652400	2164800	2371200	1572100	0.754384	1.16919	0.225514	insig
mws0889	C4H8O5	D-Threonic Acid	Others	Saccharides and Alcohols	3909-12-4	A	2146000	2287500	1865000	2490400	1823300	1681200	0.368085	0.951798	-0.0712726	insig
pme0033	C5H4N4O	Hypoxanthine	Nucleotides and derivatives	Nucleotides and derivatives	68-94-0	B	97997	124040	73575	33019	10016	6448.1	1.43891	0.167392	-2.5787	down
Zmyn002919	C8H8O2	2-Methylbenzoic acid	Phenolic acids	Phenolic acids	118-90-1	B	9002.9	11604	14551	4702.1	4758.7	3420.3	1.51063	0.366379	-1.44859	down
mws1336	C7H7NO2	4-Aminobenzoic acid	Phenolic acids	Phenolic acids	150-13-0	B	859110	1111900	930730	2011800	1506300	1228300	1.32728	1.63571	0.709915	insig
mws1078	C7H7NO2	Anthranilic Acid	Phenolic acids	Phenolic acids	118-92-3	B	656190	514570	554190	303700	558820	416750	1.02757	0.741627	-0.431234	insig
pme2268	C7H7NO2	Trigonelline	Alkaloids	Alkaloids	535-83-1	A	16948000	21962000	22828000	28579000	22194000	24107000	1.01473	1.21287	0.278422	insig
mws0146	C7H7NO2	Nicotinic Acid Methyl Ester(Methyl Nicotinate)	Alkaloids	Alkaloids	93-60-7	B	28030	50608	30533	103530	30266	42557	0.652186	1.61538	0.691876	insig
pme1002	C8H11NO	L-Tyramine	Amino acids and derivatives	Amino acids and derivatives	51-67-2	A	2379100	1896700	1883500	3717500	8199700	5686900	1.45787	2.85813	1.51507	up
pma0948	C8H11NO	Phenylethanolamine	Alkaloids	Alkaloids	7568-93-6	B	1084500	787450	800560	1391400	3071900	2197000	1.4008	2.49215	1.31739	up
Hmgn001653	C7H6O3	Protocatechualdehyde*	Phenolic acids	Phenolic acids	139-85-5	B	3247000	1120500	2022100	1115500	4404100	1593600	0.0462906	1.11325	0.154773	insig
Lmgn001670	C7H6O3	Salicylic acid	Phenolic acids	Phenolic acids	69-72-7	A	57584	46144	52063	37946	37484	37919	1.49369	0.727571	-0.45884	insig
mws0749	C7H6O3	4-Hydroxybenzoic acid	Phenolic acids	Phenolic acids	99-96-7	B	3418100	1110600	2006900	1048900	4082100	1417300	0.10285	1.00194	0.00280073	insig
Lmbn002862	C7H6O3	3-Hydroxybenzoic Acid	Organic acids	Organic acids	99-06-9	B	6497700	1475700	2972100	688710	3478600	3074600	0.5029	0.661634	-0.595896	insig
Lmbn001981	C7H6O3	2,5-Dihydroxybenzaldehyde*	Phenolic acids	Phenolic acids	1194-98-5	B	3295400	1107200	2042400	1085400	4246800	1480900	0.0316356	1.05711	0.080131	insig
pme1137	C6H5NO3	6-Hydroxynicotinic acid	Alkaloids	Alkaloids	5006-66-6	B	20753	25761	38807	32087	54367	27310	0.74002	1.33336	0.415071	insig
pme2828	C6H5NO3	4-Nitrophenol	Phenolic acids	Phenolic acids	100-02-7	B	19897000	18304000	18602000	18902000	19274000	18145000	0.213506	0.991515	-0.0122942	insig
mws0704	C2H8NO4P	O-Phosphorylethanolamine	Alkaloids	Alkaloids	1071-23-4	B	73279	75569	81379	32519	18508	27283	1.54386	0.340143	-1.55579	down
pma2987	C6H11N3O	Histidinol	Alkaloids	Alkaloids	501-28-0	B	7085800	6604000	5758400	6598100	6682000	6306000	0.126459	1.00709	0.0101935	insig
pme3207	C6H6O4	Muconic acid	Organic acids	Organic acids	1119-72-8	A	2046000	2087700	1930400	2251700	2052000	1944700	0.441792	1.03039	0.0431933	insig
pmb0764	C6H9NOS	4-Methyl-5-thiazoleethanol	Others	Others	137-00-8	B	1943.3	3420.2	4375.2	4630	4715.5	6700.1	1.14416	1.64761	0.720377	insig
Rfmb320	C7H13NO2	1-Methylpiperidine-2-carboxylic acid	Amino acids and derivatives	Amino acids and derivatives	7730-87-2	B	178970	212830	226490	319840	317630	307360	1.52859	1.52813	0.611771	insig
mws0103	C9H7NO	Indole-3-carboxaldehyde	Alkaloids	Plumerane	487-89-8	B	69403	65426	72066	56173	61720	57826	1.43899	0.849315	-0.235629	insig
pme0295	C6H11NO3	4-Acetamidobutyric acid	Organic acids	Organic acids	3025-96-5	B	41955	39173	48820	19273	21638	29727	1.4564	0.543587	-0.879418	insig
mws0567	C5H11N3O2	4-Guanidinobutyric acid	Organic acids	Organic acids	463-00-3	B	233210	174560	281220	165400	208370	167050	0.937175	0.784946	-0.349335	insig
pme2380	C5H6O5	α-Ketoglutaric acid	Organic acids	Organic acids	328-50-7	B	217060	148870	224160	104720	236930	191500	0.37773	0.903506	-0.146394	insig
mws0208	C6H10O4	Adipic Acid*	Organic acids	Organic acids	124-04-9	B	992240	664080	647270	1136800	1605000	827540	1.07553	1.54947	0.631773	insig
Wmzn000227	C6H10O4	2,2-Dimethylsuccinic acid	Organic acids	Organic acids	597-43-3	A	30069	17149	22461	51027	60352	67849	1.50022	2.5722	1.363	up
Lmbn001609	C6H10O4	2-Acetyl-2-Hydroxybutanoic Acid	Organic acids	Organic acids	-	B	135990	95359	85646	165610	226710	121710	1.16103	1.62157	0.697392	insig
mws0924	C6H10O4	2-Methylglutaric acid*	Organic acids	Organic acids	617-62-9	B	875860	589220	502670	985410	1429400	701710	1.04315	1.5838	0.663389	insig
Lmbn001676	C6H10O4	3-Hydroxy-3-Methyl-2-Oxopentanoic Acid	Organic acids	Organic acids	-	B	18676	14618	26550	5961.9	19649	11099	0.939347	0.613427	-0.705037	insig
pme0193	C5H10N2O3	L-Glutamine	Amino acids and derivatives	Amino acids and derivatives	56-85-9	A	4956400	3063200	3894100	2407100	2695400	3150800	1.20113	0.692757	-0.529579	insig
pme0026	C6H14N2O2	L-Lysine	Amino acids and derivatives	Amino acids and derivatives	56-87-1	B	5291600	3239400	4069400	2580200	2803400	3217200	1.23157	0.682582	-0.550927	insig
pme1691	C7H16NO2	Acetylcholine	Alkaloids	Alkaloids	60-31-1	B	101400	79401	82150	73735	83970	56252	0.969092	0.813676	-0.297473	insig
mws1050	C5H9NO4	O-Acetylserine	Amino acids and derivatives	Amino acids and derivatives	5147-00-2	B	1014500	1134000	1430100	719300	912800	955580	1.22205	0.723098	-0.467736	insig
pme0014	C5H9NO4	L-Glutamic acid	Amino acids and derivatives	Amino acids and derivatives	56-86-0	A	71886000	78598000	68649000	70392000	69681000	72733000	0.50625	0.971127	-0.0422679	insig
pmp001285	C8H4O3	Phthalic anhydride	Phenolic acids	Phenolic acids	85-44-9	A	772880	850150	678380	1027400	766580	776860	0.652035	1.11707	0.159722	insig
pmb2826	C5H8O5	L-Citramalic acid	Organic acids	Organic acids	6236-09-5	A	649790	521670	407060	623900	943610	369580	0.401482	1.22716	0.295318	insig
Lmbn000216	C5H8O5	3-Methylmalic acid	Organic acids	Organic acids	152204-30-3	A	42849	23045	31280	15637	21194	29410	0.969956	0.681674	-0.552846	insig
ML10171848	C5H8O5	D-Arabinono-1,4-lactone	Others	Saccharides and Alcohols	2782-09-4	A	122990	103500	94484	74122	160810	92312	0.0750535	1.01953	0.0279103	insig
mws2213	C9H8O2	Cinnamic acid	Phenolic acids	Phenolic acids	140-10-3	A	6443	3642.1	7247	5057.4	8270.1	18485	0.808011	1.83547	0.876147	insig
pme3154	C6H12O4	Mevalonic acid	Organic acids	Organic acids	150-97-0	B	163780	144700	306880	221800	280300	478620	0.942171	1.59373	0.672411	insig
Lmgp000796	C8H7NO2	4-Hydroxymandelonitrile	Alkaloids	Alkaloids	13093-65-7	A	5338600	6206800	7339700	5968900	5969900	6876900	0.0262141	0.996325	-0.00531146	insig
pme1210	C5H11NO2S	L-Methionine	Amino acids and derivatives	Amino acids and derivatives	63-68-3	A	6007700	6435800	7290400	5695400	5806100	6643200	0.778368	0.919469	-0.121128	insig
mws0847	C6H7N5	1-Methyladenine	Nucleotides and derivatives	Nucleotides and derivatives	5142-22-3	B	99718	84935	130000	106990	120720	87591	0.0551364	1.00206	0.00296805	insig
mws0262	C4H6O6	L-Tartaric acid	Organic acids	Organic acids	87-69-4	B	1172600	1101400	1068900	959090	1344800	810980	0.450483	0.931787	-0.101928	insig
Zmgn000173	C5H10O5	D-Ribose	Others	Saccharides and Alcohols	50-69-1	B	149110	116790	151270	222420	198140	177920	1.38181	1.43462	0.520668	insig
mws1499	C5H10O5	D-Arabinose	Others	Saccharides and Alcohols	10323-20-3	B	405970	368400	316720	270860	433860	284530	0.510562	0.906662	-0.141363	insig
Lmxp001668	C9H10O2	2-Methoxy-4-ethenylphenol	Phenolic acids	Phenolic acids	7786-61-0	A	1589600	1772200	1402700	145100	109600	25633	1.51385	0.0588379	-4.08711	down
pme0183	C5H5N5O	Isoguanine	Nucleotides and derivatives	Nucleotides and derivatives	3373-53-3	B	396720	181380	248460	143840	205570	239360	0.795799	0.712314	-0.489415	insig
pme1109	C5H5N5O	Guanine	Nucleotides and derivatives	Nucleotides and derivatives	73-40-5	A	1895200	475940	1031000	301260	986570	1152000	0.438462	0.717146	-0.479662	insig
pme0256	C5H4N4O2	Xanthine	Nucleotides and derivatives	Nucleotides and derivatives	69-89-6	A	31493	28071	27932	44882	26362	26123	0.298942	1.11282	0.154216	insig
mws0182	C8H8O3	p-Hydroxyphenyl acetic acid	Phenolic acids	Phenolic acids	156-38-7	B	9044.3	4432.1	3722.5	7022.1	5936.8	9	0.657518	0.753996	-0.407371	insig
pme2362	C8H8O3	Mandelic acid	Phenolic acids	Phenolic acids	90-64-2	B	72062	95616	68364	44417	33312	28606	1.48678	0.450492	-1.15043	down
mws0458	C8H8O3	Vanillin	Phenolic acids	Phenolic acids	121-33-5	B	316460	239060	288770	16679	44362	45089	1.52823	0.125703	-2.99191	down
pme0513	C5H12O5	Xylitol	Others	Saccharides and Alcohols	87-99-0	A	9156.3	13216	17559	18177	35727	13689	0.942081	1.69273	0.759354	insig
mws0437	C5H12O5	D-Arabitol	Others	Saccharides and Alcohols	488-82-4	A	59041	43299	55198	65064	77357	64719	1.25944	1.31486	0.394906	insig
mws0444	C7H7NO3	3-Aminosalicylic acid	Phenolic acids	Phenolic acids	570-23-0	B	21198	12398	5367.8	6682.7	15161	19069	0.166482	1.05002	0.0704144	insig
mws0596	C7H7NO3	3-Hydroxyanthranilic acid	Organic acids	Organic acids	548-93-6	B	9	23579	11675	22919	22073	8451.5	0.721248	1.51557	0.599859	insig
mws0183	C7H6O4	3,4-Dihydroxybenzoic acid (Protocatechuic acid)*	Phenolic acids	Phenolic acids	99-50-3	A	87331	109190	96513	21305	28042	15342	1.55646	0.220756	-2.17948	down
mws0885	C7H6O4	2,4-Dihydroxybenzoic acid	Phenolic acids	Phenolic acids	89-86-1	A	1047500	242980	477720	175110	387950	671290	0.443042	0.698083	-0.51853	insig
mws0180	C7H6O4	2,5-Dihydroxybenzoic acid; Gentisic Acid*	Phenolic acids	Phenolic acids	490-79-9	A	56864	88284	35424	25741	30532	13132	1.26229	0.384362	-1.37946	down
mws0639	C7H6O4	2,3-Dihydroxybenzoic Acid*	Organic acids	Organic acids	303-38-8	A	1696000	474680	804030	340530	700240	1008800	0.517425	0.688998	-0.537428	insig
mws0254	C6H9N3O2	L-Histidine	Amino acids and derivatives	Amino acids and derivatives	71-00-1	B	1308700	728480	908570	674820	835030	1263700	0.215337	0.941543	-0.0869013	insig
pmb0819	C10H8N2	3-Indoleacetonitrile	Alkaloids	Plumerane	771-51-7	B	13054	13461	18425	21910	31383	21476	1.35799	1.66375	0.73444	insig
Lmbn001467	C7H13NO3	5-Acetamidopentanoic Acid	Organic acids	Organic acids	1072-10-2	B	72375	51586	57751	45374	49509	48582	1.19573	0.789519	-0.340955	insig
mws0987	C10H8O2	6-MethylCoumarin	Lignans and Coumarins	Coumarins	92-48-8	B	8647.1	11598	4720.4	11021	5031.8	6878.9	0.181361	0.918536	-0.122592	insig
Zmjn001813	C7H12O4	Pimelic acid*	Organic acids	Organic acids	111-16-0	B	17555	17102	13911	20967	31784	19466	1.21016	1.48693	0.572332	insig
Lmbn002072	C7H12O4	2-Propylsuccinic acid*	Organic acids	Organic acids	618-57-5	B	27505	22734	22386	29773	38582	16813	0.341911	1.17271	0.229845	insig
pme0128	C6H12N2O3	L-Alanyl-L-Alanine	Amino acids and derivatives	Amino acids and derivatives	1948-31-8	B	19218	16275	15035	7475	11465	16295	1.04028	0.697336	-0.520074	insig
mws0005	C10H12N2	Tryptamine	Alkaloids	Plumerane	61-54-1	A	25655000	12550000	14506000	9835200	23290000	13673000	0.304481	0.887826	-0.171651	insig
mws1417	C9H7NO2	Indole-3-carboxylic acid	Alkaloids	Plumerane	771-50-6	B	37346	28079	29810	21701	31463	27161	0.84518	0.84344	-0.245643	insig
pme3382	C6H11NO4	N-Acetyl-L-threonine	Amino acids and derivatives	Amino acids and derivatives	17093-74-2	A	123180	97989	119990	93108	126200	126540	0.0660655	1.01374	0.0196938	insig
mws1346	C6H11NO4	DL-2-Aminoadipic acid	Alkaloids	Alkaloids	542-32-5	B	156820	129590	188810	104420	157410	131620	0.804935	0.827932	-0.272415	insig
pme2761	C5H6O6	4-Hydroxy-2-oxoglutaric acid	Organic acids	Organic acids	1187-99-1	B	41415	65400	58071	68647	55009	47540	0.207652	1.03827	0.0541801	insig
pme2914	C6H10O5	3-Hydroxy-3-methylpentane-1,5-dioic acid	Amino acids and derivatives	Amino acids and derivatives	503-49-1	A	439170	259750	280690	123320	222950	248980	1.09881	0.60764	-0.718712	insig
pmf0440	C10H10O2	4-MethoxycinnaMaldehyde	Phenolic acids	Phenolic acids	1963-36-6	B	199300	214620	165340	225730	180870	178010	0.0533323	1.00924	0.0132635	insig
pme2758	C5H9NO5	4-Hydroxy-L-glutamic acid	Amino acids and derivatives	Amino acids and derivatives	3913-68-6	A	103430	51270	58059	40438	60205	68309	0.578288	0.7941	-0.332607	insig
Lmbp000123	C6H13NO2S	L-Homomethionine	Amino acids and derivatives	Amino acids and derivatives	25148-30-5	B	681820	312540	621920	87365	155730	295490	1.29392	0.333225	-1.58543	down
pme1419	C6H13NO2S	L-Methionine methyl ester	Amino acids and derivatives	Amino acids and derivatives	10332-17-9	A	153400	184120	150230	158720	102870	94555	1.13017	0.730179	-0.453677	insig
mws1641	C6H4N4O2	Lumazine	Nucleotides and derivatives	Nucleotides and derivatives	487-21-8	B	17590	10339	8942.4	7829.4	21193	12578	0.202058	1.12826	0.174095	insig
pme1439	C9H8O3	p-Coumaric acid	Phenolic acids	Phenolic acids	501-98-4	A	1500300	2813200	2972900	5277700	3980600	2601600	1.02147	1.62768	0.702814	insig
pmb0142	C9H8O3	Caffeic aldehyde	Phenolic acids	Phenolic acids	141632-15-7	B	116420	99040	122120	117210	101910	122920	0.1095	1.01321	0.0189356	insig
mws0159	C9H8O3	Phenylpyruvic acid	Organic acids	Organic acids	156-06-9	B	105810	219220	139610	302470	169580	145420	0.659671	1.32892	0.410256	insig
pme2529	C6H12O5	1,5-Anhydro-D-glucitol	Others	Saccharides and Alcohols	154-58-5	B	115810	113140	100050	77177	93225	88635	1.36787	0.787347	-0.344929	insig
pme3083	C8H7NO3	2-(Formylamino)benzoic acid	Phenolic acids	Phenolic acids	3342-77-6	B	433540	135830	268620	191890	435020	466040	0.518462	1.30425	0.383222	insig
pme0021	C9H11NO2	L-Phenylalanine	Amino acids and derivatives	Amino acids and derivatives	63-91-2	A	11777000	11983000	12830000	17523000	16051000	13275000	1.30825	1.28038	0.356569	insig
pmb0037	C10H15NO	Hordenine	Alkaloids	Alkaloids	539-15-1	B	486980	596890	554790	534380	176930	210840	1.15109	0.562746	-0.829443	insig
pme0281	C8H6O4	Terephthalic acid	Phenolic acids	Phenolic acids	100-21-0	A	1052000	948110	1170800	634870	908490	618890	1.30421	0.681902	-0.552364	insig
pme0282	C8H6O4	Phthalic acid	Organic acids	Organic acids	88-99-3	A	157080	100670	171540	105360	178620	114000	0.252847	0.927066	-0.109257	insig
pmc0274	C6H6N4S	6-Methylmercaptopurine	Nucleotides and derivatives	Nucleotides and derivatives	50-66-8	B	12305000	12559000	13920000	19103000	18300000	14396000	1.33317	1.33558	0.417463	insig
mws0344	C5H10O6	D-Xylonic acid	Organic acids	Organic acids	526-91-0	A	2775500	2214100	2427100	4037500	5216700	4517500	1.53338	1.85685	0.892857	insig
pme3381	C9H10O3	3-Hydroxyphenylacetic Acid Methyl Ester	Phenolic acids	Phenolic acids	42058-59-3	B	10563	15952	19285	1132	1289.4	2851.5	1.53543	0.115129	-3.11868	down
mws0467	C9H10O3	3-(4-Hydroxyphenyl)-propionic acid	Phenolic acids	Phenolic acids	501-97-3	B	35342	75529	76627	93949	85992	90658	1.03384	1.44321	0.529281	insig
pmn001681	C10H14O2	1-(4-Methoxyphenyl)-1-propanol	Phenolic acids	Phenolic acids	5349-60-0	B	12344	9852.7	6612.4	15440	10682	10088	0.743133	1.25689	0.329864	insig
NK10253223	C8H9NO3	2-Amino-3-methoxybenzoic acid	Phenolic acids	Phenolic acids	3177-80-8	B	134110	123300	113110	231680	230530	226930	1.58512	1.85993	0.895246	insig
Zmjp000624	C8H9NO3	Pyridoxal	Others	Vitamin	66-72-8	A	129330	113870	102140	226490	240270	229040	1.57475	2.01483	1.01066	up
Hmtp000776	C8H9NO3	4,5,6-Trihydroxy-2-cyclohexen-1-ylideneacetonitrile	Alkaloids	Alkaloids	-	B	195140	196600	239480	328320	312740	232740	1.26066	1.3843	0.46916	insig
mws2125	C3H5O6P	Phosphoenolpyruvate	Organic acids	Organic acids	138-08-9	B	290480	296020	424140	133130	84420	169280	1.45365	0.382757	-1.3855	down
mws0028	C8H8O4	Vanillic acid	Phenolic acids	Phenolic acids	121-34-6	B	430370	161550	261630	47760	393660	83122	0.800833	0.614542	-0.702417	insig
Hmbp001276	C8H8O4	Gallacetophenone	Phenolic acids	Phenolic acids	528-21-2	B	202770	258090	258760	125800	132080	97885	1.51141	0.494379	-1.01631	down
pme1292	C8H8O4	Homogentisic acid	Phenolic acids	Phenolic acids	451-13-8	B	53948	60262	64736	49767	82236	43221	0.200706	0.9792	-0.0303239	insig
pme2598	C8H8O4	3,4-Dihydroxybenzeneacetic acid	Phenolic acids	Phenolic acids	102-32-9	B	157300	34407	67755	11075	69229	60900	0.671667	0.544218	-0.877742	insig
pme1383	C8H11NO3	Pyridoxine	Others	Vitamin	65-23-6	A	735480	897030	721430	1059400	1100200	1128600	1.48371	1.39689	0.482221	insig
pme0181	C7H11N3O2	3-Methyl-L-Histidine	Amino acids and derivatives	Amino acids and derivatives	368-16-1	B	40338	33274	26552	25102	38386	35989	0.0308692	0.993141	-0.00992918	insig
Zmzn000078	C3H7O6P	Dihydroxyacetone phosphate	Others	Saccharides and Alcohols	57-04-5	B	184560	40135	230810	46101	133580	70995	0.539757	0.550325	-0.861643	insig
pme3186	C3H7O6P	DL-Glyceraldehyde-3-phosphate	Organic acids	Organic acids	591-59-3	B	77040	18597	65895	17899	41277	25667	0.742957	0.52524	-0.928952	insig
mws0024	C7H6O5	Gallic acid	Tannins	Tannin	149-91-7	B	127820	59149	82327	41987	62184	54515	1.12513	0.589262	-0.763018	insig
Lmbn003524	C9H16O3	9-Oxononanoic acid	Organic acids	Organic acids	2553-17-5	B	9359.9	10006	11415	10359	10099	9091.7	0.419163	0.960001	-0.0588919	insig
pme0253	C8H15NO3	N-Acetyl-L-leucine	Amino acids and derivatives	Amino acids and derivatives	1188-21-2	A	84220	72324	70935	53358	61417	76182	0.991735	0.839449	-0.252486	insig
MA10039492	C6H6O6	Dehydroascorbic acid	Others	Vitamin	490-83-5	A	1257100	922360	1451100	931190	986890	1366300	0.428748	0.904648	-0.144571	insig
pme3009	C6H6O6	Trans-Citridic acid	Organic acids	Organic acids	4023-65-8	B	348740	649620	525370	480060	552930	532290	0.262912	1.02727	0.0388135	insig
Lmgn002555	C8H14O4	2-Propylglutaric acid	Organic acids	Organic acids	32806-62-5	A	374690	368580	487050	96264	154260	128020	1.54239	0.307679	-1.7005	down
mws0242	C8H14O4	Suberic Acid	Organic acids	Organic acids	505-48-6	B	157060	89181	84685	151460	162920	75910	0.376778	1.17939	0.238038	insig
Zmyn000155	C7H14N2O3	N-α-Acetyl-L-ornithine	Amino acids and derivatives	Amino acids and derivatives	6205-08-9	B	112980	61730	68225	41392	33064	54599	1.28914	0.531233	-0.912584	insig
mws0260	C6H14N4O2	L-Arginine	Amino acids and derivatives	Amino acids and derivatives	74-79-3	A	284440	109710	192190	63161	86839	164960	1.00847	0.537163	-0.896569	insig
pme2559	C6H9NO5	N-Acetyl-L-Aspartic Acid	Amino acids and derivatives	Amino acids and derivatives	997-55-7	A	49759	33743	39601	34519	56545	38458	0.185575	1.05214	0.0733312	insig
pme1651	C10H9NO2	Indole 3-acetic acid (IAA)	Alkaloids	Plumerane	87-51-4	B	33930	35386	33848	31741	35885	19126	0.750584	0.840913	-0.249971	insig
mws4175	C6H8O6	D-Glucurono-6,3-lactone	Others	Saccharides and Alcohols	32449-92-6	B	2388900	2979700	2203800	2845800	2039300	2148100	0.443857	0.928794	-0.106569	insig
Hmfn000531	C6H8O6	L-Ascorbic acid (Vitamin C)	Others	Vitamin	50-81-7	A	4542400	5639900	5134400	2600100	4671800	4732100	0.870562	0.78372	-0.35159	insig
pmb3101	C7H12O5	2-Isopropylmalic Acid	Organic acids	Organic acids	49601-06-1	A	880870	933820	945660	741180	834010	528290	1.14973	0.762034	-0.392073	insig
Zmgn001448	C7H12O5	2-Propylmalic Acid*	Organic acids	Organic acids	-	A	942500	1280300	1056700	731850	881250	541930	1.2559	0.657122	-0.605768	insig
Lmbn001754	C7H12O5	3-Isopropylmalic Acid*	Organic acids	Organic acids	921-28-8	A	990400	1044600	960290	745230	855630	588040	1.31213	0.730781	-0.45249	insig
pmb0774	C10H12N2O	N-Hydroxytryptamine*	Alkaloids	Phenolamine	-	A	6059900	5106600	3820900	4116600	4784500	3845200	0.714039	0.850468	-0.233672	insig
pme2024	C10H12N2O	Serotonin*	Alkaloids	Plumerane	50-67-9	A	7601800	6772800	5234000	5173200	5863800	4746000	1.02208	0.804902	-0.313115	insig
pmb0468	C6H11NO3S	N-Formyl-L-Methionine	Amino acids and derivatives	Amino acids and derivatives	4289-98-9	B	208770	159780	114540	125610	158680	126840	0.546655	0.851042	-0.232697	insig
mws1013	C9H6O4	Esculetin	Lignans and Coumarins	Coumarins	305-01-1	A	29866	72802	79531	220520	83165	67967	0.906631	2.03981	1.02844	insig
pme1021	C6H10O6	D-Glucono-1,5-lactone	Others	Saccharides and Alcohols	90-80-2	B	14148	13229	18353	13257	15678	10401	0.702205	0.860179	-0.217291	insig
mws0009	C10H10O3	Coniferaldehyde	Phenolic acids	Phenolic acids	20649-42-7	B	52775	66320	72851	26800	16015	62845	1.09296	0.550467	-0.861271	insig
pmb2795	C10H10O3	4-Methoxycinnamic acid*	Phenolic acids	Phenolic acids	830-09-1	A	263710	379090	272000	427630	266890	124640	0.442507	0.895453	-0.159311	insig
mws1195	C10H10O3	p-Coumaric acid methyl ester*	Phenolic acids	Phenolic acids	3943-97-3	A	375080	563560	408650	662810	375130	178100	0.43247	0.902582	-0.14787	insig
pmb0786	C6H13NO5	D-Glucosamine	Others	Saccharides and Alcohols	3416-24-8	B	96090	87465	92817	94914	67402	86998	0.779164	0.902096	-0.148648	insig
mws2212	C9H8O4	Caffeic acid	Phenolic acids	Phenolic acids	331-39-5	A	3181200	861590	2263400	436900	1329500	819360	1.03141	0.410035	-1.28618	down
pme0516	C6H12O6	Inositol	Others	Saccharides and Alcohols	87-89-8	B	129500	94197	92131	214400	199450	175840	1.4903	1.86712	0.900818	insig
mws1164	C6H12O6	D-Fructose*	Others	Saccharides and Alcohols	7660-25-5	A	1412400	1112800	1065500	1371800	1269200	1070400	0.235373	1.03361	0.0476984	insig
mws4170	C6H12O6	D-Glucose*	Others	Saccharides and Alcohols	14431-43-7	A	1360400	933340	857770	1212600	1293700	1057700	0.660579	1.13089	0.177454	insig
mws0250	C9H11NO3	L-Tyrosine	Amino acids and derivatives	Amino acids and derivatives	60-18-4	A	1688700	1583100	1580600	1976100	2341100	1428900	0.740774	1.18418	0.243885	insig
Lmrn001951	C9H10O4	(S)-2-Hydroxy-3-(4-Hydroxyphenyl)Propanoic Acid	Phenolic acids	Phenolic acids	23508-35-2	B	4035.3	9465	3714.5	10469	7389.5	5677.4	0.7686	1.36719	0.451214	insig
mws1350	C9H10O4	Syringaldehyde; 4-Hydroxy-3,5-Dimethoxybenzaldehyde	Phenolic acids	Phenolic acids	134-96-3	B	9	2407.3	9	9	9	9	0.708757	0.0111326	-6.48906	insig
mws0214	C6H14O6	D-Sorbitol	Others	Saccharides and Alcohols	50-70-4	B	17424	8255.8	10963	13297	17094	7094.6	0.0183442	1.023	0.0328067	insig
pme2237	C6H14O6	Dulcitol	Others	Saccharides and Alcohols	608-66-2	B	16927	7244.7	6912.1	10909	9842.4	5418.4	0.283275	0.841911	-0.24826	insig
pme2596	C8H9NO4	4-Pyridoxic acid	Others	Vitamin	82-82-6	A	289040	337120	335980	470030	477330	481140	1.56025	1.48471	0.570182	insig
pme2602	C3H8NO6P	O-Phospho-L-serine	Amino acids and derivatives	Amino acids and derivatives	407-41-0	B	32386	8077.8	29164	8555.9	20438	10659	0.660421	0.569498	-0.812237	insig
Zmgn000447	C3H7O7P	3-Phospho-D-glyceric acid	Others	Saccharides and Alcohols	820-11-1	B	1097100	881400	1041000	400160	265740	513640	1.49214	0.390641	-1.35609	down
mws0752	C11H22O2	Undecylic Acid	Lipids	Free fatty acids	112-37-8	A	608470	432320	437690	421030	406510	568050	0.305843	0.943936	-0.0832396	insig
mws0237	C9H16O4	Azelaic acid	Organic acids	Organic acids	123-99-9	A	1112300	940290	894530	966960	1049600	926180	0.0157017	0.998514	-0.00214572	insig
pme0122	C8H16N2O3	N6-Acetyl-L-lysine	Amino acids and derivatives	Amino acids and derivatives	692-04-6	A	69843	49478	64977	56113	75334	47151	0.174161	0.969072	-0.0453245	insig
mws0736	C8H16N2O3	N-Glycyl-L-leucine*	Amino acids and derivatives	Amino acids and derivatives	869-19-2	B	1743800	386190	654140	266020	603260	973600	0.461069	0.661923	-0.595264	insig
mws5041	C8H16N2O3	L-Glycyl-L-isoleucine*	Amino acids and derivatives	Amino acids and derivatives	19461-38-2	B	1445500	310470	516380	209990	469050	841140	0.442228	0.66899	-0.579943	insig
Zmjp000182	C7H16N4O2	N-Monomethyl-L-arginine	Amino acids and derivatives	Amino acids and derivatives	17035-90-4	B	98643	81061	114740	96000	59188	58548	1.07818	0.725897	-0.462163	insig
pme3388	C7H16N4O2	Homoarginine	Amino acids and derivatives	Amino acids and derivatives	156-86-5	B	14351	1900.2	13222	7843.3	6262.5	12838	0.19863	0.91418	-0.12945	insig
Zmtn001624	C10H7NO3	N-Acetylisatin	Alkaloids	Plumerane	574-17-4	A	715670	577770	586490	702140	746890	557250	0.427218	1.06721	0.093844	insig
pme0075	C7H11NO5	N-Acetyl-L-glutamic acid	Amino acids and derivatives	Amino acids and derivatives	1188-37-0	A	1224300	1440800	1432000	1636600	1526400	1558000	1.26192	1.15228	0.204489	insig
pme0278	C7H14N2O4	2,6-Diaminooimelic acid	Amino acids and derivatives	Amino acids and derivatives	583-93-7	B	25094	24816	15402	18992	34169	37768	0.819648	1.39223	0.477392	insig
pmb2561	C7H13NO3S	N-Acetyl-L-methionine	Amino acids and derivatives	Amino acids and derivatives	65-82-7	B	10955	12849	13432	11418	5726.8	16791	0.455516	0.911371	-0.13389	insig
Zmyn000453	C6H8O7	Isocitric Acid	Organic acids	Organic acids	320-77-4	A	7954700	6292000	6657500	5956000	10895000	7446000	0.517612	1.1623	0.216985	insig
mws0281	C6H8O7	Citric Acid	Organic acids	Organic acids	77-92-9	A	6547900	4511600	4662000	4002600	6814700	4898600	0.0283754	0.999644	-0.00051398	insig
Hmjp002337	C10H8O4	Isoscopoletin (6-Hydroxy-7-Methoxycoumarin)	Lignans and Coumarins	Coumarins	776-86-3	B	342300	303410	340680	102550	177330	296560	1.13916	0.584394	-0.774988	insig
Cmpp003619	C10H8O4	6,7-Dihydroxy-4-methylcoumarin	Lignans and Coumarins	Coumarins	529-84-0	B	385600	182510	209220	98177	371510	407960	0.0159669	1.12905	0.175114	insig
pme2993	C10H8O4	Scopoletin (7-Hydroxy-5-methoxycoumarin)	Lignans and Coumarins	Coumarins	92-61-5	B	322630	140950	186480	87088	289990	365360	0.0525003	1.14211	0.191698	insig
mws0277	C7H12O6	Quinic Acid	Organic acids	Organic acids	77-95-2	A	2198300	2171500	2310700	1708300	2917700	2467900	0.207618	1.06188	0.0866229	insig
mws1189	C6H10O7	D-Galacturonic acid*	Organic acids	Organic acids	685-73-4	B	94319	83303	35350	25146	49642	31359	1.05888	0.498408	-1.0046	down
pme3705	C6H10O7	D-Glucoronic acid*	Others	Saccharides and Alcohols	6556-12-3	B	88928	97944	65759	42438	34340	37431	1.52354	0.452078	-1.14536	down
Xmgn006542	C10H10O4	Dimethyl Phthalate	Phenolic acids	Phenolic acids	131-11-3	B	80179	107770	101380	51157	15782	19573	1.41326	0.299009	-1.74174	down
mws0014	C10H10O4	Ferulic acid	Phenolic acids	Phenolic acids	537-98-4	A	21064000	5506400	12873000	787950	3046200	2570100	1.35444	0.162366	-2.62268	down
Lmdn003756	C10H10O4	Methyl caffeate	Phenolic acids	Phenolic acids	3843-74-1	A	129220	91156	86142	96931	170920	431690	0.937082	2.28222	1.19044	insig
pme0534	C6H12O7	Gluconic acid	Others	Saccharides and Alcohols	526-95-4	A	264040	167160	203170	165130	213420	144420	0.759493	0.824393	-0.278596	insig
Lmlp002205	C11H16O3	Isololiolide	Terpenoids	Terpene	38274-00-9	B	19756	44168	24071	34895	6892.4	9687.1	0.90425	0.584971	-0.773564	insig
pme3827	C9H11NO4	3,4-Dihydroxy-L-phenylalanine (L-Dopa)	Amino acids and derivatives	Amino acids and derivatives	59-92-7	B	16387	26234	19993	21334	16640	13999	0.713601	0.830054	-0.268723	insig
pmb2497	C9H10O5	4-Hydroxy-3-methoxymandelate	Phenolic acids	Phenolic acids	55-10-7	B	219250	148730	210010	152230	163070	206690	0.48913	0.903113	-0.147022	insig
mws0027	C9H10O5	Syringic acid	Phenolic acids	Phenolic acids	530-57-4	B	6898.4	4162.1	1488.2	3029	1793.9	2238.4	0.66245	0.562712	-0.829532	insig
Zmzn000079	C4H9O7P	D-Erythrose-4-phosphate	Others	Saccharides and Alcohols	585-18-2	B	154200	101910	149610	117650	143950	140170	0.0167977	0.990264	-0.0141146	insig
pmb2640	C12H24O2	Dodecanoic acid (Lauric acid)	Lipids	Free fatty acids	143-07-7	A	96093	98104	85213	74272	90063	69687	1.13444	0.837558	-0.255739	insig
mws5037	C9H18N2O3	L-Alanyl-L-leucine	Amino acids and derivatives	Amino acids and derivatives	3303-34-2	B	55799	60833	44550	78966	42755	38502	0.18258	0.99405	-0.00860938	insig
NK10251888	C8H18N4O2	NG,NG-Dimethyl-L-arginine	Amino acids and derivatives	Amino acids and derivatives	30315-93-6	A	101170	95665	116210	87335	71968	73123	1.4049	0.742468	-0.429599	insig
mws0018	C10H26N4	Spermine	Alkaloids	Phenolamine	71-44-3	B	6677600	6965500	5378200	6052200	6804800	6389400	0.164279	1.01183	0.0169728	insig
mws0282	C11H12N2O2	L-Tryptophan	Amino acids and derivatives	Amino acids and derivatives	73-22-3	A	3728000	3189100	3857800	4261000	4959200	4424000	1.36764	1.26629	0.340613	insig
Zmtn001464	C10H7NO4	4,8-Dihydroxyquinoline-2-carboxylic acid	Organic acids	Organic acids	59-00-7	B	9	3539.9	1797.9	59538	50254	39310	1.27562	27.8862	4.80148	up
pmb0818	C11H11NO3	Methoxyindoleacetic acid	Alkaloids	Plumerane	3471-31-6	B	373790	316200	331330	415910	473810	410890	1.40623	1.27346	0.348753	insig
pme1261	C9H19NO4	D-Panthenol	Others	Saccharides and Alcohols	81-13-0	B	17971	6989.4	10753	23956	12551	105390	0.961861	3.97321	1.99031	insig
pmb1587	C13H18O2	4-Hydroxy-3,5-diisopropylbenzaldehyde	Phenolic acids	Phenolic acids	10537-86-7	B	4794.5	3434	2752.8	4499	3600.4	3821.3	0.438402	1.08555	0.11842	insig
Lmln010063	C14H22O	2,6-Di-tert-butylphenol	Phenolic acids	Phenolic acids	128-39-2	A	354840	414640	278900	368480	316720	253450	0.524955	0.895334	-0.159503	insig
Zmgn002106	C11H13NO3	N-Acetyl-L-phenylalanine	Amino acids and derivatives	Amino acids and derivatives	2018-61-3	A	104260	62366	57248	46604	81643	85104	0.133943	0.952996	-0.0694581	insig
mws1014	C10H8O5	Fraxetin (7,8-Dihydroxy-6-methoxycoumarin)	Lignans and Coumarins	Coumarins	574-84-5	B	179290	140300	134740	72732	212640	294390	0.194341	1.27608	0.35172	insig
mws1212	C11H12O4	Methyl ferulate	Phenolic acids	Phenolic acids	2309-07-1	A	8954800	12695000	9944800	4570800	1970500	1615200	1.46362	0.258161	-1.95366	down
mws2184	C11H12O4	Ethyl caffeate	Phenolic acids	Phenolic acids	102-37-4	B	12029	4594.2	10068	12893	6634.6	4441.9	0.252824	0.89803	-0.155164	insig
pmb2620	C11H12O4	3,4-Dimethoxycinnamic acid	Phenolic acids	Phenolic acids	14737-89-4	A	4325900	6172900	5048200	2135200	1075700	842300	1.48514	0.260706	-1.9395	down
pme3443	C11H12O4	Sinapinaldehyde	Phenolic acids	Phenolic acids	4206-58-0	B	11157	9313.6	9263.5	8172.7	8718.9	11385	0.384637	0.950982	-0.0725097	insig
Zmyn000108	C6H10O8	D-Saccharic acid*	Others	Saccharides and Alcohols	87-73-0	A	567510	426600	568090	577200	693900	649950	1.12189	1.22971	0.298316	insig
Zmpn000199	C6H10O8	D-Galactaric acid*	Others	Saccharides and Alcohols	526-99-8	A	1178600	987840	905000	1029300	1223300	960480	0.347261	1.04612	0.0650417	insig
Hmcn000192	C7H14O7	Sedoheptulose	Others	Saccharides and Alcohols	3019-74-7	A	547990	380970	390060	410170	488370	464640	0.270847	1.03348	0.0475096	insig
mws0853	C11H14O4	Sinapyl alcohol	Phenolic acids	Phenolic acids	537-33-7	B	9	2681.1	1550.5	2687.3	3038.5	11552	0.92996	4.07438	2.02658	insig
Zmgn003633	C12H20O3	12-Oxo-10E-Dodecenoic Acid	Lipids	Free fatty acids	65410-38-0	B	931.27	1702.1	2940.8	2114.5	2433.3	1639.6	0.450344	1.11001	0.150576	insig
mws0863	C5H11O7P	2-Deoxyribose-5'-phosphate	Nucleotides and derivatives	Nucleotides and derivatives	102916-66-5	B	24454	35059	21968	21046	52574	22601	0.258613	1.1809	0.239888	insig
pmb2507	C5H11O7P	2-Deoxyribose-1-phosphate	Nucleotides and derivatives	Nucleotides and derivatives	17210-42-3	B	380930	101900	185610	62591	810450	236040	0.180049	1.65921	0.730495	insig
pmb2873	C13H13NO2	3-(2-Naphthyl)-L-alanine	Amino acids and derivatives	Amino acids and derivatives	58438-03-2	B	10595	6800.8	16061	9	28589	12871	0.548609	1.23948	0.309734	insig
pme0170	C8H16N4O3	N-Acetyl-L-Arginine	Amino acids and derivatives	Amino acids and derivatives	155-84-0	A	16896	20507	15964	23958	13517	18886	0.124773	1.0561	0.0787493	insig
mws5045	C12H24O3	12-Hydroxydodecanoic acid	Lipids	Free fatty acids	505-95-3	A	1687.8	1043	1146	2488.7	1311.2	1777.5	0.934264	1.43866	0.524726	insig
mws0677	C12H14N2O2	N-Acetyl-5-hydroxytryptamine	Alkaloids	Alkaloids	1210-83-9	B	242220	254670	237100	248020	204080	165850	0.995905	0.841905	-0.24827	insig
Lmrj001698	C9H18N2O4	L-Seryl-L-Isoleucine	Amino acids and derivatives	Amino acids and derivatives	91086-51-0	A	2573300	371100	872130	124540	503900	1340800	0.63585	0.515977	-0.954623	insig
mws1337	C9H17NO5	D-Pantothenic Acid	Others	Vitamin	79-83-4	A	802380	697010	747140	1088000	1622300	1323100	1.48635	1.79539	0.844298	insig
pme1228	C11H12N2O3	5-Hydroxy-L-tryptophan	Amino acids and derivatives	Amino acids and derivatives	56-69-9	A	9	9	9	10651	11053	8836.6	1.60671	1131.13	10.1436	up
Hmyp002656	C11H11NO4	Methyl dioxindole-3-acetate	Others	Others	57061-18-4	A	9228.2	5297.1	4618.2	9573.9	4675.9	6557.3	0.206046	1.0869	0.120221	insig
mws4174	C8H15NO6	N-Acetyl-D-mannosamine	Others	Saccharides and Alcohols	7772-94-3	B	34373	19672	36585	32381	63148	49318	1.04549	1.59822	0.676469	insig
mws2608	C8H15NO6	N-Acetyl-D-galactosamine	Others	Saccharides and Alcohols	1811-31-0	B	27786	18511	16338	26771	32087	32270	1.21277	1.45491	0.540925	insig
pme2755	C8H15NO6	N-Acetyl-D-glucosamine	Others	Saccharides and Alcohols	7512-17-6	B	147470	157870	136850	149700	185260	138850	0.525802	1.07151	0.0996422	insig
mws5042	C11H14N2O3	L-Glycyl-L-phenylalanine	Amino acids and derivatives	Amino acids and derivatives	721-66-4	B	700480	159170	295350	114730	194500	385660	0.608228	0.601636	-0.733036	insig
Hmgp005956	C13H18O3	Dehydrovomifoliol	Terpenoids	Monoterpenoids	15764-81-5	B	92750	103130	79602	104540	95069	91207	0.513767	1.05566	0.0781486	insig
mws0520	C11H13NO4	N-Acetyl-L-tyrosine	Amino acids and derivatives	Amino acids and derivatives	537-55-3	A	37270	46380	42697	27443	33630	37967	1.17021	0.783873	-0.351308	insig
pmb2643	C14H26O2	Myristoleic acid	Lipids	Free fatty acids	544-64-9	A	2501.3	3186	2523.5	1258.2	2287.6	1875.9	1.18767	0.660313	-0.598778	insig
pme1194	C9H13N3O4	2'-Deoxycytidine	Nucleotides and derivatives	Nucleotides and derivatives	951-77-9	B	35035	20425	31932	25048	75122	34935	0.715321	1.54597	0.628508	insig
mws0119	C14H28O2	Myristic Acid	Lipids	Free fatty acids	544-63-8	A	16901000	10206000	9584700	8520200	10835000	8743700	0.841739	0.765811	-0.38494	insig
Lmhp001461	C11H20N2O3	L-Prolyl-L-Leucine	Amino acids and derivatives	Amino acids and derivatives	52899-07-7	B	125920	48507	72064	57975	95523	65012	0.169717	0.886483	-0.173836	insig
mws0474	C12H22O4	Dodecanedioic aicd	Organic acids	Organic acids	693-23-2	A	1145.7	452.09	1548.2	705.07	1276.8	1206.1	0.196619	1.01334	0.019124	insig
Lmhp001670	C11H22N2O3	L-Valyl-L-Leucine	Amino acids and derivatives	Amino acids and derivatives	3989-97-7	B	2721200	436330	1149000	244170	1005300	1683300	0.395151	0.681005	-0.554262	insig
pmb0962	C10H22N2O4	L-Lysine-Butanoic Acid	Amino acids and derivatives	Amino acids and derivatives	80407-71-2	B	12318000	10045000	9602900	10655000	11597000	10881000	0.392829	1.03651	0.0517351	insig
mws4176	C12H16N2O3	L-Alanyl-L-Phenylalanine	Amino acids and derivatives	Amino acids and derivatives	3061-90-3	B	237740	34866	110550	30228	102840	158440	0.221358	0.760808	-0.394396	insig
Lmhn003240	C11H10O6	Benzoylmalic acid	Phenolic acids	Phenolic acids	22138-51-8	A	2173100	1689100	2176100	6374300	15692000	7624100	1.51098	4.91701	2.29778	up
pmn001669	C12H14O5	Methyl sinapate	Phenolic acids	Phenolic acids	20733-94-2	A	9285.7	20745	8076.9	9778	5232.2	3164.9	1.04762	0.476942	-1.06812	down
pme2827	C16H32O	Palmitaldehyde	Lipids	Free fatty acids	629-80-1	B	5019100	4797200	4781300	4863400	4677000	4682800	0.887102	0.974352	-0.0374851	insig
pme0264	C10H14N2O5	Thymidine	Nucleotides and derivatives	Nucleotides and derivatives	50-89-5	B	189790	110100	129060	110330	152690	118410	0.410749	0.889218	-0.169391	insig
mws0359	C15H30O2	Pentadecanoic Acid	Lipids	Free fatty acids	1002-84-2	A	133030	117630	127990	108700	148750	133240	0.215309	1.0318	0.0451594	insig
pme3732	C9H13N3O5	Cytidine	Nucleotides and derivatives	Nucleotides and derivatives	65-46-3	B	1373500	407380	699770	248040	800640	758300	0.466125	0.72843	-0.457138	insig
ML10180524	C9H13N3O5	Cytarabine	Nucleotides and derivatives	Nucleotides and derivatives	147-94-4	B	724260	212250	551610	235430	906380	755690	0.308823	1.2751	0.350609	insig
mws0248	C9H12N2O6	Uridine	Nucleotides and derivatives	Nucleotides and derivatives	58-96-8	A	1840000	302320	873320	224070	1557400	998350	0.104446	0.921801	-0.117473	insig
pme2266	C10H16N2O3S	Biotin	Others	Vitamin	58-85-5	B	200540	155850	204770	106010	220320	142620	0.667619	0.83568	-0.258978	insig
Lmhp002031	C12H24N2O3	L-Leucyl-L-Leucine	Amino acids and derivatives	Amino acids and derivatives	3303-31-9	B	1242600	246820	668020	129580	501820	795810	0.485654	0.661529	-0.596123	insig
pmb2591	C13H14N2O3	N-Acetyl-L-Tryptophan	Amino acids and derivatives	Amino acids and derivatives	1218-34-4	A	20929000	11676000	13623000	9235400	28927000	27591000	0.504227	1.42237	0.508299	insig
mws0124	C13H14N2O3	N-(3-Indolylacetyl)-L-alanine	Amino acids and derivatives	Amino acids and derivatives	57105-39-2	B	10683	10662	11919	8196.1	7636	10980	1.12513	0.80604	-0.311077	insig
pme2563	C8H14N2O5S	γ-Glu-Cys	Amino acids and derivatives	Amino acids and derivatives	636-58-8	B	26162	23358	8979	42883	25791	8425.8	0.233472	1.31797	0.398315	insig
pme3961	C10H13N5O3	2'-Deoxyadenosine	Nucleotides and derivatives	Nucleotides and derivatives	958-09-8	A	299520	125110	164360	139800	456530	415830	0.761099	1.71847	0.781122	insig
Lmhn003373	C11H10O7	p-Hydroxybenzoylmalic acid	Phenolic acids	Phenolic acids	-	B	689170	396010	550790	502780	1311600	462440	0.503292	1.39172	0.476874	insig
Hmbp003234	C12H14O6	1-O-Caffeoylglycerol	Lipids	Glycerol ester	-	B	49460	60834	60463	44518	26299	52185	1.04378	0.720334	-0.473263	insig
mws0361	C16H30O2	Palmitoleic Acid	Lipids	Free fatty acids	373-49-9	A	3714.1	3334.7	3449.7	1765.2	4573.8	2930.1	0.514754	0.882898	-0.179682	insig
pma3101	C11H14NO6+	Nicotinate D-ribonucleoside	Others	Vitamin	17720-18-2	B	3042100	742170	1367700	519270	1818100	1995400	0.216357	0.840993	-0.249835	insig
mws1488	C16H32O2	Palmitic acid	Lipids	Free fatty acids	57-10-3	A	19945	12734	14416	12762	17995	16158	0.0244022	0.996178	-0.00552463	insig
mws0120	C8H20NO6P	Choline Alfoscerate	Lipids	PC	28319-77-9	B	85955	121870	108270	418570	449420	281720	1.55296	3.63723	1.86284	up
pme1187	C10H14N2O6	5-Methyluridine	Nucleotides and derivatives	Nucleotides and derivatives	1463-10-1	B	4167.9	2384.1	2689.9	2303.4	3240.9	2339.3	0.528263	0.853028	-0.229335	insig
Zmyn000110	C6H14NO8P	D-Glucosamine 1-phosphate	Others	Saccharides and Alcohols	2152-75-2	B	56314	53433	80795	80312	67747	101390	0.981445	1.30915	0.388636	insig
mws1090	C6H13O9P	Glucose-1-phosphate*	Others	Saccharides and Alcohols	59-56-3	A	4720800	4312000	4730800	3462000	3208600	2660200	1.47992	0.677933	-0.560785	insig
mws0866	C6H13O9P	D-Glucose 6-phosphate*	Others	Saccharides and Alcohols	56-73-5	A	5852800	5965100	6183900	4266400	3963100	3273000	1.51385	0.638964	-0.646194	insig
pme3313	C6H13O9P	D-Fructose 6-phosphate*	Others	Saccharides and Alcohols	643-13-0	A	904560	620130	962210	532590	403650	380120	1.41817	0.529318	-0.917794	insig
Cmpp007319	C15H16O4	7-Methoxy-5-Prenyloxycoumarin	Lignans and Coumarins	Coumarins	35590-41-1	A	2241.9	3391.1	2555.5	3709	1712.5	1805.2	0.497897	0.882543	-0.180262	insig
Zmpn000095	C6H15O9P	Sorbitol-6-phosphate	Others	Saccharides and Alcohols	20479-58-7	B	30846	34399	56559	29648	41374	52793	0.0932268	1.01651	0.0236246	insig
Lmhp001732	C14H18N2O3	L-Prolyl-L-Phenylalanine	Amino acids and derivatives	Amino acids and derivatives	13589-02-1	B	53490	51220	39421	41935	64193	41914	0.0875587	1.02714	0.0386259	insig
mws0715	C13H16N2O4	Phenylacetyl-L-glutamine	Amino acids and derivatives	Amino acids and derivatives	28047-15-6	B	13894	7843.1	7287.2	18871	31119	15505	1.31075	2.25656	1.17412	up
Lmlp003161	C14H20N2O3	N-Feruloylputrescine	Alkaloids	Phenolamine	501-13-3	B	22723	25301	11388	18081	11904	14262	0.677226	0.744749	-0.425175	insig
Lmhp002001	C14H20N2O3	L-Valyl-L-Phenylalanine	Amino acids and derivatives	Amino acids and derivatives	3918-92-1	B	362700	90740	233270	97327	273850	372230	0.120258	1.08256	0.114451	insig
pme1184	C10H13N5O4	2'-Deoxyguanosine	Nucleotides and derivatives	Nucleotides and derivatives	961-07-9	B	334470	216770	266950	214210	372870	276630	0.185986	1.05563	0.0781111	insig
pme0230	C10H13N5O4	Adenosine	Nucleotides and derivatives	Nucleotides and derivatives	58-61-7	A	825350	370120	688850	914010	3795200	2852600	1.27831	4.01302	2.00469	up
pme2890	C8H16N2O4S2	L-Homocystine	Amino acids and derivatives	Amino acids and derivatives	626-72-2	B	33534	4007.1	16102	6025.6	15571	20820	0.0416154	0.790719	-0.338764	insig
mws1060	C10H12N4O5	9-(Arabinosyl)hypoxanthine	Nucleotides and derivatives	Nucleotides and derivatives	7013-16-3	A	118530	92488	93084	110620	85872	96207	0.294698	0.962503	-0.0551375	insig
pmp000087	C13H16O6	2-Feruloyl-sn-glycerol	Phenolic acids	Phenolic acids	-	A	7544900	7150000	5200700	4680500	3680900	2755900	1.35275	0.558782	-0.839643	insig
pmp000086	C13H16O6	1-Feruloyl-sn-glycerol	Phenolic acids	Phenolic acids	-	B	6360400	5439900	6720400	2786000	2675100	3069900	1.57985	0.46062	-1.11835	down
mws0383	C17H32O2	10-Heptadecenoic Acid	Lipids	Free fatty acids	29743-97-3	A	445190	337160	269090	217210	316430	430760	0.330351	0.917218	-0.124663	insig
mws1175	C16H14O4	Pinostrobin	Flavonoids	Dihydroflavone	480-37-5	B	1446.4	3270.7	4163.3	1722.1	1973.7	1490.3	0.893817	0.583994	-0.775975	insig
mws1297	C13H18O6	Benzyl glucoside	Phenolic acids	Phenolic acids	4304-12-5	A	7603.7	6621.1	9555	51727	87697	49999	1.57833	7.96571	2.9938	up
pme0376	C15H12O5	Naringenin (5,7,4'-Trihydroxyflavanone)	Flavonoids	Dihydroflavone	480-41-1	A	48556	51882	57019	71031	78951	64544	1.45584	1.36244	0.446195	insig
pme3472	C12H16O7	Arbutin	Phenolic acids	Phenolic acids	497-76-7	B	76222	100240	94333	106980	221360	95393	0.9359	1.56477	0.645954	insig
Lmmn003323	C16H32O3	2-Hydroxyhexadecanoic acid	Organic acids	Organic acids	764-67-0	B	597640	182340	276630	159900	414110	316050	0.212148	0.842373	-0.247468	insig
pmp001264	C16H35NO2	Hexadecylsphingosine	Lipids	Sphingolipids	-	A	2463500	2497600	2541600	2654100	1919400	1934000	0.953914	0.867354	-0.205306	insig
pmb1574	C18H28O2	9,12-Octadecadien-6-Ynoic Acid	Lipids	Free fatty acids	61481-29-6	B	51422	31881	38981	25414	38700	24106	1.00445	0.721435	-0.471058	insig
mws1038	C11H22N2O4S	Pantetheine	Others	Others	496-65-1	B	2397.5	7408.3	3682.9	4496.8	6739.2	5448.5	0.670867	1.23692	0.306757	insig
Lmlp012720	C16H22O4	Dibutyl phthalate*	Phenolic acids	Phenolic acids	84-74-2	A	16132000	17617000	13969000	21444000	17095000	16754000	0.909309	1.15875	0.212563	insig
Lmxp011770	C16H22O4	Diisobutyl phthalate*	Phenolic acids	Phenolic acids	84-69-5	A	16304000	17878000	14536000	21530000	16911000	16366000	0.752079	1.12498	0.169905	insig
mws5035	C15H22N2O3	L-Leucyl-L-phenylalanine	Amino acids and derivatives	Amino acids and derivatives	56217-82-4	B	491550	92364	164150	131480	421980	442210	0.482978	1.331	0.412506	insig
Lmbn005923	C18H30O2	Crepenynic acid	Lipids	Free fatty acids	2277-31-8	A	459140	256350	364380	231310	351460	402230	0.299747	0.912147	-0.132662	insig
pmb0889	C18H30O2	Punicic acid (9Z,11E,13Z-octadecatrienoic acid)	Lipids	Free fatty acids	544-72-9	B	234460	201280	192170	229410	268450	276190	1.25928	1.23274	0.301869	insig
mws0367	C18H30O2	α-Linolenic Acid*	Lipids	Free fatty acids	463-40-1	A	28308000	15863000	23776000	13449000	21183000	25330000	0.39734	0.882482	-0.180361	insig
mws0366	C18H30O2	γ-Linolenic Acid*	Lipids	Free fatty acids	506-26-3	A	30900000	18204000	22934000	14514000	22982000	26985000	0.386484	0.895097	-0.159884	insig
Lmhn002926	C13H12O7	p-Coumaroylmalic acid	Phenolic acids	Phenolic acids	-	A	3591900	7319400	6834100	7940000	6587300	6025500	0.591627	1.1582	0.21189	insig
mws0629	C13H16N2O5	L-Aspartyl-L-Phenylalanine	Amino acids and derivatives	Amino acids and derivatives	13433-09-5	A	39991	27003	23274	37389	49296	33941	0.985467	1.33631	0.418254	insig
mws1491	C18H32O2	Linoleic acid	Lipids	Free fatty acids	60-33-3	A	53119000	32711000	41434000	33251000	49024000	49620000	0.164322	1.03639	0.0515655	insig
Lmbn006152	C18H32O2	(9Z,11E)-Octadecadienoic acid	Lipids	Free fatty acids	2540-56-9	B	35482	17552	28547	22335	29359	33619	0.231769	1.04575	0.0645324	insig
Hmhp001812	C11H15N5O4	2'-O-Methyladenosine	Nucleotides and derivatives	Nucleotides and derivatives	2140-79-6	A	386510	58434	124840	42749	80923	137220	0.680043	0.457879	-1.12696	insig
YC512118	C18H35NO	Oleamide (9-Octadecenamide)	Lipids	Free fatty acids	301-02-0	A	13141	7909.4	6354.9	15418	29743	18906	1.33665	2.33776	1.22513	up
mws2623	C18H34O2	11-Octadecanoic acid(Vaccenic acid)	Lipids	Free fatty acids	506-17-2	A	2653400	1226800	1917400	1458800	2267600	2501200	0.265814	1.07417	0.10322	insig
pme1178	C10H13N5O5	Guanosine	Nucleotides and derivatives	Nucleotides and derivatives	118-00-3	A	27458000	8689700	15399000	5584300	17904000	14280000	0.487354	0.732701	-0.448704	insig
pmp001252	C17H17NO3	p-Coumaroyltyramine	Alkaloids	Phenolamine	36417-86-4	B	3193.3	18476	8119.4	9	3192.6	4625.6	0.861297	0.262757	-1.9282	insig
mws0051	C16H12O5	Acacetin	Flavonoids	Flavonoid	480-44-4	B	275940	1070500	948950	821060	117970	912160	0.392297	0.806482	-0.310286	insig
mws0129	C16H12O5	Genkwanin (Apigenin 7-methyl ether)	Flavonoids	Flavonoid	437-64-9	B	269920	1071500	905940	784960	110850	902080	0.40311	0.800001	-0.321926	insig
mws0668	C10H12N4O6	Xanthosine	Nucleotides and derivatives	Nucleotides and derivatives	146-80-5	A	860790	640380	780200	544850	419960	533680	1.40773	0.656838	-0.606391	insig
Zmyn005026	C18H36O2	16-Methylheptadecanoic acid	Lipids	Free fatty acids	2724-58-5	B	5652100	8723200	6411200	8101100	7005500	7243900	0.496816	1.07524	0.10466	insig
mws1489	C18H36O2	Stearic Acid	Lipids	Free fatty acids	57-11-4	A	13281000	20201000	15062000	18297000	17031000	16731000	0.518075	1.07241	0.100855	insig
mws1068	C15H10O6	Kaempferol (3,5,7,4'-Tetrahydroxyflavone)	Flavonoids	Flavonols	520-18-3	A	421150	329740	435890	746400	726760	862770	1.53448	1.96829	0.976945	insig
mws1521	C13H18O7	Salicin	Phenolic acids	Phenolic acids	138-52-3	A	192930	128480	161770	150810	160130	135620	0.418769	0.92421	-0.113707	insig
mws1094	C15H12O6	Aromadendrin (Dihydrokaempferol)	Flavonoids	Dihydroflavonol	480-20-6	B	5844	7158.2	7544.7	23530	27563	20730	1.58545	3.49556	1.80553	up
pmn001686	C16H32O4	10,16-Dihydroxypalmitic acid	Lipids	Free fatty acids	3233-90-7	A	56447	43810	62810	56877	33460	64960	0.288568	0.952351	-0.0704349	insig
pme3163	C7H15O10P	D-Sedoheptuiose 7-phosphate	Others	Saccharides and Alcohols	2646-35-7	B	770540	1335600	778090	1391300	877810	1468400	0.766282	1.29584	0.373891	insig
pmb2657	C10H18N4O6	Argininosuccinic acid	Organic acids	Organic acids	2387-71-5	B	264980	225630	227840	183980	209590	138960	1.22031	0.741221	-0.432025	insig
Zmyn004548	C18H28O3	12-Oxo-phytodienoic acid	Lipids	Free fatty acids	85551-10-6	B	17283	4395	9573.9	3693.5	8749.9	11500	0.33652	0.766142	-0.384316	insig
pmb2792	C18H30O3	13-Hydroxy-6,9,11-octadecatrienoic acid	Lipids	Free fatty acids	74784-20-6	B	25342	54197	34577	25166	28560	22079	0.976195	0.66428	-0.590136	insig
pmb2787	C18H30O3	9-Oxo-10E,12Z-octadecadienoic acid	Lipids	Free fatty acids	54232-59-6	A	38537	21741	30883	22547	26675	34266	0.299035	0.91583	-0.126848	insig
pmb2786	C18H30O3	9-Hydroxy-10,12,15-octadecatrienoic acid*	Lipids	Free fatty acids	89886-42-0	B	25601	9074.9	18699	9605.4	18656	22042	0.0639807	0.942454	-0.0855055	insig
Lmbn005443	C18H30O3	13-KODE; (9Z,11E)-13-Oxooctadeca-9,11-dienoic acid*	Lipids	Free fatty acids	54739-30-9	B	25669	10951	17504	10353	19078	19285	0.210139	0.900081	-0.151873	insig
Zmpn003368	C18H30O3	13S-Hydroxy-9Z,11E,15Z-octadecatrienoic acid	Lipids	Free fatty acids	87984-82-5	B	125380	81260	79466	78333	99422	321360	0.600947	1.74451	0.802823	insig
Lmqp000329	C8H14N3O7P	5-Aminoimidazole ribonucleotide	Nucleotides and derivatives	Nucleotides and derivatives	25635-88-5	A	210880	338530	236180	1009000	1055600	614780	1.51319	3.41066	1.77005	up
Lmhn102068	C13H12O8	2-O-Caffeoylmalic acid	Phenolic acids	Phenolic acids	53755-04-7	B	5472.3	4893.3	5433.4	9335.5	5116.8	1141.2	0.408338	0.986993	-0.0188885	insig
pmb2799	C18H32O3	12,13-Epoxy-9-Octadecenoic Acid	Lipids	Free fatty acids	6799-85-5	B	29735	27904	28764	27863	31730	33047	0.852063	1.07218	0.100554	insig
Lmbn005369	C18H32O3	13(S)-HODE;13(S)-Hydroxyoctadeca-9Z,11E-dienoic acid*	Lipids	Free fatty acids	10219-69-9	A	253200	201930	200050	238380	282640	304520	1.18658	1.26002	0.333447	insig
Lmbn005662	C18H32O3	9(10)-EpOME;(9R,10S)-(12Z)-9,10-Epoxyoctadecenoic acid	Lipids	Free fatty acids	16833-56-0	A	121080	71035	85805	84918	106030	116750	0.488514	1.10715	0.146845	insig
Rfmb091	C18H32O3	9S-Hydroxy-10E,12Z-octadecadienoic acid*	Lipids	Free fatty acids	15514-85-9	A	254690	204680	199740	235720	288980	303400	1.16214	1.25639	0.329286	insig
pme1474	C11H15N5O3S	5'-Deoxy-5'-(methylthio)adenosine	Nucleotides and derivatives	Nucleotides and derivatives	2457-80-9	A	6823900	8385300	5995100	6724400	5146900	4650000	1.05124	0.779149	-0.36003	insig
pmb0197	C11H15N5O5	N7-Methylguanosine	Nucleotides and derivatives	Nucleotides and derivatives	20244-86-4	B	47529	45523	50382	95253	74427	64559	1.43692	1.63308	0.707594	insig
Zmyn004714	C18H34O3	Ricinoleic acid	Lipids	Free fatty acids	141-22-0	A	255980	143640	159770	145480	186170	192360	0.167118	0.936753	-0.0942601	insig
Zmgn005057	C18H34O3	9,10-Epoxyoctadecanoic Acid	Lipids	Free fatty acids	2443-39-2	A	419180	249220	413740	230300	211640	304070	1.07229	0.689384	-0.53662	insig
pmf0297	C20H42O	1-Eicosanol	Lipids	Free fatty acids	629-96-9	B	245450	148490	172220	155370	183580	192310	0.227826	0.938357	-0.0917917	insig
Lmhn001386	C12H12O9	Vnilloyltartaric acid	Phenolic acids	Phenolic acids	-	B	16152	15050	13147	11034	16820	17118	0.0047369	1.01405	0.0201255	insig
pmp000001	C16H12O6	Hispidulin (5,7,4'-Trihydroxy-6-methoxyflavone)	Flavonoids	Flavonoid	1447-88-7	B	17722	14977	14103	7888	7118.1	5742	1.54864	0.443317	-1.17359	down
Zmhn001926	C13H16O8	1-O-Salicyl-D-glucose	Phenolic acids	Phenolic acids	60517-74-0	A	25315000	13157000	16059000	7395400	11698000	6249200	1.3098	0.464737	-1.10551	down
pmb3142	C13H16O8	Salicylic acid-2-O-glucoside	Phenolic acids	Phenolic acids	10366-91-3	A	10306000	7892700	7857700	5178700	10077000	5182600	0.809078	0.784387	-0.350363	insig
pme2816	C20H28O2	4-Oxoretinol	Others	Vitamin	62702-55-0	B	3280.9	2504.8	2635.1	2943.8	2658.9	2861.8	0.0780909	1.00519	0.00746755	insig
Lmqn008288	C18H36O3	3-Hydroxyoctadecanoic Acid	Lipids	Free fatty acids	45261-96-9	B	406030	378320	479120	456410	473960	443380	0.839038	1.08728	0.120728	insig
pme2954	C15H10O7	Quercetin	Flavonoids	Flavonols	117-39-5	A	896420	700820	811360	87570	36640	56787	1.58224	0.0751461	-3.73416	down
Cmsp004086	C16H14O6	Dihydrokaempferide	Flavonoids	Flavonols	137225-59-3	B	308620	179310	360430	32542	28892	24411	1.57703	0.101189	-3.30487	down
Zmhn000892	C13H18O8	4-O-Glucosyl-3,4-dihydroxybenzyl alcohol	Phenolic acids	Phenolic acids	-	A	109530	169390	103920	157160	78599	95076	0.503142	0.86416	-0.21063	insig
mws1375	C12H21N3O6	Nicotianamine	Amino acids and derivatives	Amino acids and derivatives	34441-14-0	B	161930	122560	118740	173200	87066	207780	0.238018	1.16074	0.215047	insig
mws0044	C15H12O7	Dihydroquercetin(Taxifolin)	Flavonoids	Dihydroflavonol	480-18-2	B	19018	34956	44948	9	9	9	1.60282	0.000272942	-11.8391	down
pme1086	C10H17N3O6S	Glutathione reduced form	Amino acids and derivatives	Amino acids and derivatives	70-18-8	A	97226	66353	85456	136880	139240	251930	1.34874	2.12038	1.08433	up
pmn001610	C20H36O2	Eicosadienoic acid	Lipids	Free fatty acids	5598-38-9	A	93565	24544	45109	34574	87059	63928	0.345192	1.13689	0.185093	insig
Lmhn003074	C14H14O8	Feruloylmalic acid	Phenolic acids	Phenolic acids	-	A	4121200	9946000	9867300	12824000	8256300	7638400	0.529653	1.19989	0.262899	insig
pmb2791	C18H30O4	9-Hydroperoxy-10E,12,15Z-octadecatrienoic acid	Lipids	Free fatty acids	111004-08-1	A	107730	325870	192350	366440	433580	74059	0.242435	1.3964	0.481716	insig
pmn001606	C20H38O2	Eicosenoic acid	Lipids	Free fatty acids	26764-41-0	A	720230	1599400	807180	777760	288680	707870	0.960442	0.567451	-0.817433	insig
Lmtp001399	C14H17NO7	5,6-Dihydroxyindole-5-O-β-glucoside	Alkaloids	Alkaloids	-	B	143630	168730	125150	9	9	9	1.60647	6.17129e-05	-13.9841	down
pme3967	C12H17N5O5	2-(Dimethylamino)guanosine	Nucleotides and derivatives	Nucleotides and derivatives	2140-67-2	B	127450	97781	103840	77343	105770	99880	0.831516	0.859976	-0.217633	insig
mws0636	C18H20N2O3	L-Phenylalanyl-L-phenylalanine	Amino acids and derivatives	Amino acids and derivatives	2577-40-4	A	55708	15768	50554	21526	57554	44436	0.119713	1.01218	0.0174621	insig
Zmjn004133	C18H32O4	9S-Hydroperoxy-10E,12Z-octadecadienoic acid	Lipids	Free fatty acids	5502-91-0	A	40881	52459	51402	45300	53591	38462	0.323596	0.948951	-0.0755952	insig
Lmbn004685	C18H32O4	5S,8R-DiHODE; (5S,8R,9Z,12Z)-5,8-Dihydroxyoctadeca-9,12-dienoate	Lipids	Free fatty acids	-	A	8181.4	34458	14858	27147	80233	9814.6	0.579381	2.03826	1.02734	insig
Lmbn005287	C18H32O4	7S,8S-DiHODE; (9Z,12Z)-(7S,8S)-Dihydroxyoctadeca-9,12-dienoic acid	Lipids	Free fatty acids	143288-65-7	A	247110	94524	140890	91081	168270	179260	0.137173	0.908993	-0.137659	insig
pmn001689	C18H32O4	9-Hydroxy-12-oxo-15(Z)-octadecenoic acid	Lipids	Free fatty acids	-	B	132450	44435	64239	34822	46590	71314	0.746013	0.633392	-0.65883	insig
pmb2804	C18H32O4	13S-Hydroperoxy-9Z,11E-octadecadienoic acid	Lipids	Free fatty acids	33964-75-9	B	186360	185440	174810	193030	170780	195090	0.31975	1.02248	0.0320783	insig
pmf0397	C20H40O2	Arachidic acid	Lipids	Free fatty acids	506-30-9	B	2174700	2138200	3556600	2123500	1671900	1770400	1.07103	0.707262	-0.499683	insig
mws1433	C18H19NO4	N-Feruloyltyramine	Alkaloids	Phenolamine	66648-43-9	A	298590	421480	294440	528070	720820	428860	1.28556	1.65375	0.725745	insig
mws1174	C17H14O6	3-O-Acetylpinobanksin	Flavonoids	Dihydroflavonol	52117-69-8	A	312.58	12459	22017	4070.1	9	9	1.05	0.117513	-3.08911	down
Lmmn002179	C14H18O8	Methyl salicylate-2-O-glucoside	Phenolic acids	Phenolic acids	10019-60-0	B	39987	52622	48385	54321	50956	38210	0.08605	1.01768	0.0252863	insig
Lmbn005487	C18H34O4	12,13-DHOME; (9Z)-12,13-Dihydroxyoctadec-9-enoic acid	Lipids	Free fatty acids	263399-35-5	B	37576	29999	34218	22220	25305	23509	1.47966	0.697828	-0.519057	insig
mws0066	C16H12O7	Isorhamnetin	Flavonoids	Flavonols	480-19-3	A	2503700	1857300	2068800	36418	43270	50130	1.60366	0.0201901	-5.63021	down
Lmmn004912	C16H12O7	3-O-Methylquercetin	Flavonoids	Flavonols	1486-70-0	B	2381.7	5810.8	3369.5	4791.4	2664.4	5218.7	0.275856	1.09622	0.132538	insig
pmb2871	C13H16O9	1-O-Gentisoyl-D-glucoside*	Phenolic acids	Phenolic acids	23445-11-6	A	482740	457090	497390	304990	321020	218610	1.46111	0.587676	-0.766907	insig
pmn001367	C13H16O9	Protocatechuic acid-4-O-glucoside*	Phenolic acids	Phenolic acids	-	A	254350	250300	271790	196140	231500	157690	1.25911	0.753864	-0.407624	insig
Lmfp001509	C13H16O9	1-O-Galloyl-rhamnose	Tannins	Tannin	-	B	165560	122370	150970	19619	18247	20287	1.60169	0.132497	-2.91597	down
Hmtn001120	C14H20O8	5-(2-Hydroxyethyl)-2-O-glucosylphenol	Phenolic acids	Phenolic acids	-	A	257410	292060	255340	101270	32517	59252	1.48507	0.239857	-2.05976	down
pmb2221	C18H39NO3	4-Hydroxysphinganine	Lipids	Sphingolipids	554-62-1	A	142010	119730	114700	95681	164130	105590	0.22006	0.970675	-0.0429394	insig
pmb0751	C16H16O7	Trans-5-O-(p-Coumaroyl)shikimate	Phenolic acids	Phenolic acids	-	B	129640	190650	210180	99568	159330	145600	0.858111	0.762528	-0.391139	insig
mws0582	C11H19N3O6S	S-(Methyl)glutathione	Amino acids and derivatives	Amino acids and derivatives	2922-56-7	A	60516	54405	47609	54957	40021	67387	0.113988	0.998985	-0.00146536	insig
pmn001513	C14H10O9	Digallic Acid	Tannins	Tannin	536-08-3	B	8876.1	8355.8	6845	4020.1	5958.2	15333	0.212049	1.05127	0.072132	insig
pme3174	C9H14N3O8P	Cytidine 5'-monophosphate(Cytidylic acid)	Nucleotides and derivatives	Nucleotides and derivatives	63-37-6	B	299290	33584	139370	25028	73434	189410	0.419328	0.609583	-0.714105	insig
pme3188	C9H13N2O9P	Uridine 5'-monophosphate	Nucleotides and derivatives	Nucleotides and derivatives	58-97-9	B	1457200	107470	392570	125790	239210	647990	0.347455	0.51756	-0.950201	insig
mws0983	C20H39NO2	N-Oleoylethanolamine	Alkaloids	Alkaloids	111-58-0	B	273900	67372	97473	34456	81635	84716	0.883881	0.457685	-1.12757	insig
Zmhn002301	C15H18O8	p-Coumaric acid-4-O-glucoside	Phenolic acids	Phenolic acids	117405-48-8	A	21225000	26435000	27352000	32588000	22238000	29637000	0.584098	1.12599	0.171198	insig
pmn001690	C16H24O7	3-Hydroxy-4-isopropylbenzylalcohol-3-O-glucoside	Phenolic acids	Phenolic acids	-	B	308340	210730	271680	155370	244830	199310	1.00671	0.758154	-0.399438	insig
mws0884	C10H12N5O6P	Cyclic 3',5'-Adenylic acid	Nucleotides and derivatives	Nucleotides and derivatives	60-92-4	A	73663	38466	62889	119310	435580	327000	1.39935	5.03885	2.3331	up
Lmmn003663	C14H18O9	5-Glucosyloxy-2-Hydroxybenzoic acid methyl ester	Phenolic acids	Phenolic acids	-	B	82981	54811	52246	61872	77926	53027	0.10735	1.01467	0.0210042	insig
Lmtn002565	C14H18O9	1-O-Vanilloyl-D-Glucose	Phenolic acids	Phenolic acids	-	B	625700	676480	657810	533390	485270	589140	1.38237	0.82031	-0.285758	insig
Zmhn001883	C14H18O9	Vanillic acid-4-O-glucoside	Phenolic acids	Phenolic acids	32142-31-7	B	54340	82784	65934	37299	29741	39965	1.45179	0.526968	-0.924214	insig
pmn001517	C15H22O8	3,4,5-Trimethoxyphenyl-1-O-Glucoside	Phenolic acids	Phenolic acids	-	B	3469100	2379800	2494600	2181400	4697800	1844800	0.0559731	1.0456	0.0643371	insig
Hmqn003054	C18H34O5	9,10,11-Trihydroxy-12-octadecenoic acid	Lipids	Free fatty acids	61911-67-9	A	20419	24757	25660	22688	19581	26866	0.197198	0.975987	-0.0350665	insig
pmn001694	C18H34O5	9,10,13-Trihydroxy-11-Octadecenoic Acid	Lipids	Free fatty acids	29907-57-1	A	381930	370800	376560	372360	389500	415010	0.846858	1.04213	0.0595389	insig
Lmbn004240	C18H34O5	9,10-Dihydroxy-12,13-epoxyoctadecanoic acid	Lipids	Free fatty acids	-	B	18983	16859	18152	16026	17307	18698	0.513262	0.963644	-0.0534277	insig
Lmbn003970	C18H34O5	9,12,13-TriHOME; 9(S),12(S),13(S)-Trihydroxy-10(E)-octadecenoic acid	Lipids	Free fatty acids	97134-11-7	A	29783	28959	26339	27084	33932	30417	0.691426	1.07466	0.103878	insig
pmp001284	C19H38O4	Monopalmitin	Lipids	Glycerol ester	542-44-9	A	13313	7737.9	8020.9	7030.9	8721	9531.1	0.458357	0.869674	-0.201453	insig
pme3184	C10H14N5O6P	2'-Deoxyadenosine-5'-monophosphate	Nucleotides and derivatives	Nucleotides and derivatives	653-63-4	A	228070	313250	335140	352540	363430	343720	1.05225	1.20906	0.273882	insig
pmb0789	C14H21NO8	Pyridoxine-5'-O-glucoside	Others	Vitamin	-	B	382650	313400	423620	486820	485050	522610	1.36088	1.33475	0.41657	insig
Lmfn000604	C13H16O10	6-O-Galloyl-D-glucose	Tannins	Tannin	13186-19-1	A	151710	141230	127260	145510	122140	142150	0.295713	0.97525	-0.0361562	insig
pmn001518	C13H16O10	1-O-Galloyl-D-glucose	Tannins	Tannin	58511-73-2	A	406800	440180	507510	463110	369740	317010	0.900888	0.848925	-0.236292	insig
Hmln000873	C13H16O10	2-O-Galloyl-D-glucose	Tannins	Tannin	-	B	527210	729670	675320	572560	469470	426650	1.15726	0.760108	-0.395724	insig
mws0675	C11H15N2O8P	β-Nicotinamide mononucleotide	Nucleotides and derivatives	Nucleotides and derivatives	1094-61-7	B	647470	234920	559410	250030	970870	473850	0.173346	1.17544	0.233201	insig
pmb0776	C20H20N2O3	N-Feruloyltryptamine	Alkaloids	Phenolamine	53905-13-8	A	56322	47291	47998	11837	12252	15735	1.58895	0.262672	-1.92866	down
pmb0382	C19H14O6	O-Feruloyl 4-hydroxycoumarin	Lignans and Coumarins	Coumarins	-	B	9	39462	45483	1393800	669720	711470	1.16366	32.6646	5.02966	up
pme3311	C6H14O12P2	D-Fructose-1,6-biphosphate	Others	Saccharides and Alcohols	488-69-7	B	29127	15740	41332	16774	37652	24710	0.128513	0.918062	-0.123337	insig
Zmyn000083	C6H14O12P2	D-Glucose 1,6-bisphosphate	Others	Saccharides and Alcohols	10139-18-1	B	31224	6900.6	41407	6484.4	21209	18731	0.46878	0.583723	-0.776645	insig
mws1015	C15H16O9	Esculin (6,7-DihydroxyCoumarin-6-glucoside)	Lignans and Coumarins	Coumarins	531-75-9	A	476010	947670	883500	1256700	367410	855400	0.0220909	1.07469	0.103924	insig
Zmhn001793	C15H18O9	6-O-Caffeoyl-D-glucose	Phenolic acids	Phenolic acids	-	B	12709000	16450000	17630000	15918000	11575000	16344000	0.364365	0.936908	-0.0940203	insig
mws1080	C12H22O11	Galactinol	Others	Saccharides and Alcohols	3687-64-7	A	406000	548720	653240	1429900	349540	459630	0.24749	1.39249	0.477668	insig
Lmsn000381	C12H22O11	D-Maltose*	Others	Saccharides and Alcohols	133-99-3	A	223400	507550	244020	1143500	175250	274260	0.273364	1.63391	0.708326	insig
mws5038	C12H22O11	Isomaltulose*	Others	Saccharides and Alcohols	13718-94-0	A	255490	743660	425080	1105300	159120	419330	0.055065	1.18222	0.241496	insig
mws0264	C12H22O11	D-Trehalose*	Others	Saccharides and Alcohols	99-20-7	A	165000	279740	305270	661080	116820	203270	0.033964	1.30821	0.387593	insig
pme0519	C12H22O11	D-Sucrose*	Others	Saccharides and Alcohols	57-50-1	A	182650	244490	262910	605660	190810	212560	0.472977	1.46226	0.548196	insig
mws0906	C16H22O8	Coniferin	Phenolic acids	Phenolic acids	531-29-3	B	18141000	22970000	26433000	22673000	18237000	23631000	0.238171	0.95554	-0.0656117	insig
pmb2211	C19H38N2O3	Cocamidopropyl betaine	Alkaloids	Alkaloids	4292-10-8	A	21381	36508	17619	16168	12673	27882	0.675011	0.751218	-0.412696	insig
HJAP050	C19H21NO5	N-Feruloyl-3-methoxytyramine	Alkaloids	Phenolamine	78510-19-7	A	97658	263840	142890	26347	25728	82848	1.31957	0.267498	-1.9024	down
Lmmn000774	C15H20O9	Dihydrocaffeoylglucose	Phenolic acids	Phenolic acids	-	B	78271	22541	40069	38988	52673	30415	0.0898524	0.866519	-0.206697	insig
mws0609	C10H12N5O7P	Guanosine 3',5'-cyclic monophosphate	Nucleotides and derivatives	Nucleotides and derivatives	7665-99-8	A	178240	60133	136130	108420	178080	293450	0.736796	1.54859	0.630951	insig
pmb0801	C14H19NO9	4-Pyridoxic acid-O-glucoside	Others	Vitamin	-	A	26244	25465	39220	43208	35788	65559	1.12638	1.58976	0.668806	insig
Lmtn000940	C14H18O10	1-O-(3,4-Dihydroxy-5-methoxy-benzoyl)-glucoside	Phenolic acids	Phenolic acids	-	B	35947	49272	36500	9277.7	3968.4	6205.9	1.55204	0.159811	-2.64556	down
pmb0981	C10H14N5O7P	Adenosine 5'-monophosphate	Nucleotides and derivatives	Nucleotides and derivatives	61-19-8	A	3634800	2777600	7036000	3101100	7579100	3578800	0.135091	1.06027	0.0844383	insig
mws0874	C10H14N5O7P	3'-Adenylic Acid	Nucleotides and derivatives	Nucleotides and derivatives	84-21-9	A	44734	23557	42691	17735	23069	40323	0.752432	0.730992	-0.452072	insig
pmb1562	C21H34O4	1-Stearidonoyl-Glycerol	Lipids	Glycerol ester	-	B	10262	5019.8	4864.3	3521.4	12901	15879	0.515186	1.60336	0.681096	insig
pmb0770	C20H20N2O4	N-Feruloylserotonin	Alkaloids	Phenolamine	68573-23-9	B	9	9	9	87314	9	9	0.700072	3234.52	11.6593	insig
Lmhp011562	C21H36O4	1-α-Linolenoyl-glycerol	Lipids	Glycerol ester	-	A	8559000	3461900	6817300	3437400	7829600	5664300	0.198805	0.898775	-0.153968	insig
Lmhp011388	C21H36O4	2-α-Linolenoyl-glycerol	Lipids	Glycerol ester	55268-58-1	A	4427800	1629000	3439900	1447000	3596300	2610300	0.382645	0.805922	-0.311288	insig
mws0178	C16H18O9	Chlorogenic acid (3-O-Caffeoylquinic acid)*	Phenolic acids	Phenolic acids	327-97-9	A	154510	23395	17021	16176	27129	11022	0.806951	0.278706	-1.84319	insig
mws2108	C16H18O9	Cryptochlorogenic acid (4-O-Caffeoylquinic acid)	Phenolic acids	Phenolic acids	905-99-7	B	129890	13742	11056	15100	20782	5843.2	0.669575	0.269738	-1.89037	insig
mws1077	C16H18O9	Scopoletin-7-O-glucoside (Scopolin)	Lignans and Coumarins	Coumarins	531-44-2	A	33615	33283	23474	43393	27320	76661	0.85509	1.63075	0.705534	insig
pme1816	C16H18O9	Neochlorogenic acid (5-O-Caffeoylquinic acid)*	Phenolic acids	Phenolic acids	906-33-2	A	149660	22966	18018	19276	28148	8520.3	0.803032	0.293449	-1.76882	insig
Lmhp012042	C21H38O4	2-Linoleoylglycerol	Lipids	Glycerol ester	3443-82-1	A	770930	408700	584680	504830	864500	544690	0.278248	1.08485	0.117502	insig
Lmhp112042	C21H38O4	1-Linoleoylglycerol	Lipids	Glycerol ester	2277-28-3	A	854620	424300	579230	519880	867700	555620	0.187204	1.04577	0.0645674	insig
Zmhn002422	C16H20O9	1-O-Feruloyl-D-Glucose	Phenolic acids	Phenolic acids	-	A	27040000	25892000	23749000	14396000	18602000	16609000	1.49516	0.646927	-0.628325	insig
Hmmn002544	C16H20O9	Ferulic acid-4-O-glucoside	Phenolic acids	Phenolic acids	117405-51-3	A	928760	1189800	1056000	268030	239380	393150	1.55619	0.28368	-1.81766	down
Zmhn002334	C16H20O9	6-O-Feruloyl-D-glucose	Phenolic acids	Phenolic acids	137887-25-3	B	4406600	5492900	5283100	2723400	1760300	1617800	1.50813	0.401875	-1.31518	down
pmb0296	C21H40O4	1-Oleoyl-Sn-Glycerol	Lipids	Glycerol ester	129784-87-8	A	504820	224030	452970	383860	499580	759230	0.756421	1.38995	0.475032	insig
pmb3107	C15H20O10	Glucosyringic Acid	Phenolic acids	Phenolic acids	-	B	25958	49528	35413	40717	29322	45952	0.213429	1.04592	0.0647665	insig
pmb0998	C10H14N5O8P	Guanosine 5'-monophosphate	Nucleotides and derivatives	Nucleotides and derivatives	85-32-5	A	533200	106960	373760	100150	405720	412080	0.0906531	0.905348	-0.143456	insig
mws5040	C12H21O11Na	Turanose	Others	Saccharides and Alcohols	547-25-1	B	131310	330720	195980	436670	131850	245460	0.292288	1.23703	0.306884	insig
pmb0964	C16H23N5O5	Isopentenyladenine-7-N-glucoside	Nucleotides and derivatives	Nucleotides and derivatives	-	B	10033	19949	17789	39999	9503.7	23951	0.489078	1.53762	0.6207	insig
Lmgp003270	C16H16O10	Scopoletin-7-O-glucuronide	Lignans and Coumarins	Coumarins	132752-65-9	B	52796	42740	44711	413960	257540	216220	1.56315	6.32969	2.66213	up
pma3724	C17H20O9	1-O-Feruloylquinic acid	Phenolic acids	Phenolic acids	-	B	87917	64612	91646	433530	332470	350590	1.57765	4.57291	2.19311	up
pmb0752	C17H20O9	3-O-Feruloylquinic acid	Phenolic acids	Phenolic acids	1899-29-2	B	62625	88003	78115	704710	437310	480960	1.57904	7.09521	2.82685	up
Lmbp002309	C17H22O9	Sinapaldehyde-4-O-Glucoside	Phenolic acids	Phenolic acids	154461-65-1	B	19830	13561	6445.5	19524	35337	31859	1.2019	2.1769	1.12227	up
pmn001695	C16H20O10	Trihydroxycinnamoylquinic acid	Phenolic acids	Phenolic acids	-	B	44838	42162	33975	85342	79753	71778	1.54085	1.95803	0.969405	insig
mws0011	C17H24O9	Syringin	Phenolic acids	Phenolic acids	118-34-3	B	39764	29988	12950	38911	37058	49991	0.94324	1.52306	0.606972	insig
mws0232	C17H20N4O6	Riboflavin (Vitamin B2)	Others	Vitamin	83-88-5	A	913400	1189800	757010	1787500	1401700	1611200	1.39685	1.67834	0.747034	insig
pme3337	C14H17N5O8	Succinyladenosine	Nucleotides and derivatives	Nucleotides and derivatives	4542-23-8	A	1076200	841200	745700	875960	2986100	1427500	0.995034	1.98624	0.990041	insig
pme1286	C14H20N6O5S	S-(5'-Adenosy)-L-homocysteine	Amino acids and derivatives	Amino acids and derivatives	979-92-0	A	350110	333120	364550	489020	432470	498290	1.51303	1.35504	0.438332	insig
Zmhn002227	C17H22O10	4-O-Glucosyl-sinapate	Phenolic acids	Phenolic acids	-	B	5372.6	11401	3562.7	6749.5	11991	18272	0.943552	1.82002	0.863955	insig
pmb2940	C17H22O10	1-O-Glucosyl sinapate	Phenolic acids	Phenolic acids	78185-48-5	B	849110	1484500	1071800	605070	387930	324020	1.42979	0.386743	-1.37055	down
HJN003	C17H22O10	1-O-Sinapoyl-D-glucose	Phenolic acids	Phenolic acids	-	B	309000	445720	282110	504290	262920	241870	0.199643	0.973236	-0.0391388	insig
Lmmp010562	C24H38O4	Diisooctyl Phthalate	Phenolic acids	Phenolic acids	27554-26-3	B	895380	271360	473590	346130	364660	420250	0.570292	0.68952	-0.536336	insig
pme2735	C15H22N6O5S	S-Adenosyl-L-methionine	Amino acids and derivatives	Amino acids and derivatives	29908-03-0	B	1690800	1677500	1856600	1690400	1836800	1331400	0.579374	0.929893	-0.104863	insig
Cmjn004337	C18H26O10	Benzyl-(2''-O-xylosyl)glucoside	Phenolic acids	Phenolic acids	-	B	26861	48696	41411	24865	12709	13717	1.34674	0.438505	-1.18934	down
pme3007	C9H14N2O12P2	Uridine 5'-diphosphate	Nucleotides and derivatives	Nucleotides and derivatives	27821-45-0	A	111270	37683	121570	45216	112340	52290	0.352969	0.775705	-0.36642	insig
pmd0152	C19H39O7P	LysoPA 16:0 (2n isomer)	Lipids	Glycerol ester	-	B	12927	9	8102.9	9	34372	9	0.403857	1.63459	0.70893	insig
pmd0153	C19H39O7P	LysoPA 16:0	Lipids	Glycerol ester	22002-85-3	B	21852	9	12310	9	26993	9	0.477047	0.790466	-0.339225	insig
Lmbp003668	C20H18O10	Kaempferol-3-O-arabinoside	Flavonoids	Flavonoid	-	B	2570200	1208600	1439700	1480300	2128100	1318200	0.0735832	0.944064	-0.0830428	insig
pmn001663	C22H26O8	Syringaresinol	Lignans and Coumarins	Lignans	21453-69-0	B	1810	3003.3	2468.5	1811.5	608.86	3052.9	0.691472	0.751636	-0.411895	insig
mws2523	C12H23O14P	Trehalose 6-phosphate	Others	Saccharides and Alcohols	4484-88-2	B	5412.2	4685.9	12963	8076.9	7899.6	8413.4	0.400613	1.05762	0.0808225	insig
Lmhp008337	C19H40NO7P	LysoPE 14:0(2n isomer)	Lipids	LPE	-	B	32267	13159	21920	13347	44099	19165	0.131161	1.13757	0.185959	insig
pmb0864	C19H40NO7P	LysoPE 14:0	Lipids	LPE	-	B	153900	49416	89175	56088	233240	96071	0.319049	1.31764	0.397961	insig
pmp000436	C30H50O	Taraxerol	Terpenoids	Triterpene	127-22-0	B	800.2	9	9	9	9	9	0.732129	0.0329993	-4.92142	insig
pme2117	C10H15N5O10P2	Adenosine 5'-diphosphate	Nucleotides and derivatives	Nucleotides and derivatives	58-64-0	A	402390	218120	468650	157590	280020	215470	1.03489	0.599618	-0.737884	insig
mws0919	C21H20O10	Kaempferol-3-O-rhamnoside (Afzelin)	Flavonoids	Flavonols	482-39-3	A	77962	39973	45821	37332	63849	52065	0.141936	0.935819	-0.0956984	insig
pme0321	C21H20O10	Kaempferol-7-O-rhamnoside	Flavonoids	Flavonols	20196-89-8	B	22741	17810	16309	33407	32975	26933	1.44206	1.64114	0.714695	insig
Lmtn002324	C19H28O11	Benzyl-(2''-O-glucosyl)glucoside	Phenolic acids	Phenolic acids	-	B	18717	20124	21729	18663	6274.2	17638	0.89089	0.702909	-0.50859	insig
mws2186	C20H18O11	Avicularin(Quercetin-3-O-α-L-arabinofuranoside)	Flavonoids	Flavonols	572-30-5	A	2845600	1712200	1764000	6415.3	4114.6	363.97	1.55369	0.00172322	-9.18068	down
Lmdp003509	C20H18O11	Quercetin-3-O-xyloside (Reynoutrin)	Flavonoids	Flavonols	549-32-6	B	4106100	683850	2592100	8058.6	7802.2	4769.7	1.57815	0.00279468	-8.4831	down
HJN087	C21H22O10	Naringenin-4'-O-glucoside	Flavonoids	Flavonoid	-	B	100740	66039	73940	29319	79112	43822	1.01492	0.632493	-0.660879	insig
mws1179	C21H22O10	Naringenin-7-O-glucoside (Prunin)	Flavonoids	Dihydroflavone	529-55-5	B	23663	22159	13517	37819	39932	23079	1.17504	1.69922	0.764872	insig
HJN055	C21H24O10	Dihydrocharcone-4'-O-glucoside	Flavonoids	Chalcones	-	A	409070	549750	435850	617940	521230	640300	1.19914	1.27591	0.351524	insig
mws2118	C21H24O10	Phloretin-2'-O-glucoside (Phlorizin)	Flavonoids	Chalcones	60-81-1	A	230170	266730	202950	314010	258980	351180	1.20912	1.32053	0.401113	insig
Lmhp008440	C20H40NO7P	LysoPE 15:1	Lipids	LPE	-	A	7375.1	3975.4	5244.7	2219.3	9963.5	5030.8	0.164198	1.03726	0.0527828	insig
Lmhp008273	C20H40NO7P	LysoPE 15:1(2n isomer)	Lipids	LPE	-	B	2526.3	721.77	2042.6	706.12	2973.4	927.71	0.27833	0.870822	-0.199551	insig
Lmlp003024	C20H30O7N4	N'-p-Coumaroylagmatine-glucoside	Alkaloids	Phenolamine	-	B	45240	53168	55959	84348	76584	160070	1.30907	2.07947	1.05622	up
Lmhp009187	C20H42NO7P	LysoPE 15:0	Lipids	LPE	-	A	85275	28327	46863	41224	113640	70903	0.622073	1.40695	0.492576	insig
Lmhp008885	C20H42NO7P	LysoPE 15:0(2n isomer)	Lipids	LPE	-	A	17351	7332.1	11009	7691	20299	14066	0.323197	1.1783	0.236707	insig
pme1014	C31H40O2	Menatetrenone (Vitamin K2)	Others	Vitamin	11032-49-8	B	55962	55724	47735	46280	48587	48375	1.11021	0.898514	-0.154387	insig
Lmhp007836	C21H38NO7P	LysoPE 16:3	Lipids	LPE	-	A	61512	39912	58377	26683	56733	42348	0.725614	0.787004	-0.345557	insig
Hmcp002316	C21H20O11	Isorhamnetin-3-O-arabinoside	Flavonoids	Flavonols	-	A	8535900	6706200	5327000	48149	67177	68961	1.60191	0.00895941	-6.80238	down
mws2209	C21H20O11	Kaempferol-3-O-glucoside (Astragalin)	Flavonoids	Flavonols	480-10-4	B	4500500	3289500	4924000	6709400	10585000	12832000	1.41667	2.36955	1.24461	up
Xmyp005654	C21H20O11	Kaempferol-4'-O-glucoside	Flavonoids	Flavonoid	-	A	760110	658390	708080	1424900	1936300	1169100	1.49092	2.13032	1.09107	up
mws0045	C21H20O11	Quercetin-3-O-rhamnoside(Quercitrin)	Flavonoids	Flavonols	522-12-3	B	383920	235480	303030	9	9	9	1.60663	2.92705e-05	-15.0602	down
Hmpp003270	C21H20O11	Luteolin-4'-O-glucoside	Flavonoids	Flavonoid	6920-38-3	A	6033700	5304400	5030700	9270900	12800000	11176000	1.54085	2.03111	1.02227	up
mws0913	C21H20O11	Kaempferol-3-O-galactoside (Trifolin)	Flavonoids	Flavonols	23627-87-4	B	120950	93007	77013	13955	30359	21714	1.51393	0.226924	-2.13972	down
Lmlp003531	C21H20O11	Luteolin-3'-O-glucoside	Flavonoids	Flavonoid	5154-41-6	A	7573800	5130000	5543200	7955800	11524000	12408000	1.34531	1.74756	0.805345	insig
pme2459	C21H20O11	Luteolin-7-O-glucoside (Cynaroside)	Flavonoids	Flavonoid	5373-11-5	A	165020	195660	163810	4450000	3165000	2633900	1.59605	19.5407	4.28841	up
HJN086	C21H22O11	Eriodictyol-3'-O-glucoside	Flavonoids	Dihydroflavone	-	B	17047	22312	27933	9	9	1542.6	1.4015	0.0231915	-5.43026	down
Lmtn002796	C21H22O11	Aromadendrin-7-O-glucoside	Flavonoids	Flavonoid	28189-90-4	B	136850	150210	157000	603880	535660	550250	1.60099	3.80532	1.92802	up
mws0057	C21H22O11	Eriodictyol-7-O-glucoside	Flavonoids	Dihydroflavone	38965-51-4	B	5849	3157	6190.5	98693	56940	74542	1.57216	15.1466	3.92092	up
Lmmn004625	C21H22O11	Dihydrokaempferol-7-O-glucoside	Flavonoids	Flavonols	-	B	16829	7608.8	7224.8	40412	36211	23649	1.41519	3.16689	1.66307	up
Lmhp008763	C21H42NO7P	LysoPE 16:1(2n isomer)	Lipids	LPE	-	A	108420	44549	77698	34661	65767	48455	0.862337	0.645446	-0.631633	insig
Lmhp009034	C21H42NO7P	LysoPE 16:1	Lipids	LPE	-	A	212310	92850	148120	108180	331840	147740	0.392124	1.29668	0.374825	insig
HJN041	C21H24O11	Epicatechin glucoside	Flavonoids	Flavanols	-	B	13388	15035	10137	13738	11079	6694.9	0.692175	0.817217	-0.291208	insig
pmd0160	C21H44NO7P	LysoPE 16:0(2n isomer)	Lipids	LPE	-	A	3505600	1047700	1790400	1236400	4181300	2122200	0.281207	1.18857	0.249221	insig
pmb0876	C21H44NO7P	LysoPE 16:0	Lipids	LPE	53862-35-4	A	16050000	4390200	7858300	5161700	19769000	10975000	0.350058	1.26882	0.343487	insig
Lmhp005872	C25H30N2O6	Diferuloylcadaverine	Alkaloids	Phenolamine	-	B	42576	46026	34806	9	9	9	1.60649	0.000218786	-12.1582	down
mws4053	C30H48O3	Ursolic acid	Terpenoids	Triterpene	77-52-1	B	5801.8	7652	9357.8	8968.1	10004	8397.9	0.911884	1.19983	0.262828	insig
pmb2654	C19H27NO12	Anthranilate-1-O-Sophoroside	Phenolic acids	Phenolic acids	-	B	50562	101730	79732	189340	43215	63127	0.110195	1.27436	0.349772	insig
Lmzn001894	C21H18O12	Kaempferol-3-O-glucuronide	Flavonoids	Flavonols	22688-78-4	A	941510	896300	837320	5085600	4329600	5181000	1.59973	5.45626	2.44791	up
mws4167	C21H18O12	Luteolin-7-O-glucuronide	Flavonoids	Flavonoid	29741-10-4	A	3330800	2653000	2945900	17339000	16565000	15231000	1.59917	5.50242	2.46007	up
Lmmp003767	C21H18O12	Kaempferol-7-O-glucuronide	Flavonoids	Flavonols	-	B	407370	431510	736080	22636000	22412000	31812000	1.59677	48.8012	5.60885	up
Hmcp002539	C22H22O11	Isorhamnetin-3-O-rhamnoside	Flavonoids	Flavonols	-	B	2863200	2458000	1866900	7624.3	10076	18094	1.59804	0.00497966	-7.64974	down
pmp000579	C22H22O11	Diosmetin-7-O-galactoside	Flavonoids	Flavonoid	-	A	496720	496910	487800	228990	218570	231980	1.6061	0.458705	-1.12436	down
mws1329	C21H20O12	Quercetin-7-O-glucoside*	Flavonoids	Flavonols	491-50-9	A	404890	522730	367450	18287	19521	13370	1.59799	0.0395176	-4.66136	down
mws0091	C21H20O12	Quercetin-3-O-glucoside (Isoquercitrin)*	Flavonoids	Flavonols	482-35-9	A	787620	909670	647090	47499	24988	31777	1.59534	0.044474	-4.49089	down
mws0061	C21H20O12	Quercetin-3-O-galactoside (Hyperin)	Flavonoids	Flavonols	482-36-0	A	914220	1417200	987530	67859	45321	56894	1.59633	0.0512433	-4.28649	down
Lmdp003286	C21H20O12	Isohyperoside	Flavonoids	Flavonols	35589-21-0	A	6392800	6172000	5505500	847470	972240	892050	1.60272	0.150067	-2.73632	down
Lmzp002365	C22H24O11	Hesperetin-7-O-glucoside	Flavonoids	Flavonoid	31712-49-9	B	5949700	3315500	9	103680	42212	76506	0.0321967	0.0240036	-5.38061	insig
pme1598	C22H24O11	Hesperetin-5-O-glucoside	Flavonoids	Dihydroflavonol	69651-80-5	B	616920	870620	623480	36217	24931	26674	1.59952	0.0416017	-4.58721	down
Lmhp009464	C22H44NO7P	LysoPE 17:1(2n isomer)	Lipids	LPE	-	A	43941	15266	23619	17111	61212	35163	0.46233	1.37017	0.454359	insig
Lmhp009769	C22H44NO7P	LysoPE 17:1	Lipids	LPE	-	A	47945	14824	26116	18614	63149	32045	0.385775	1.2804	0.35659	insig
Xmsn002700	C21H22O12	Taxifolin-3'-O-glucoside	Flavonoids	Flavonoid	31106-05-5	B	20852	24506	19189	9	9	9	1.60641	0.0004183	-11.2232	down
pmd0130	C22H46NO7P	LysoPC 14:0	Lipids	LPC	20559-16-4	A	61124	35672	62456	35273	65416	38841	0.395889	0.876159	-0.190736	insig
Zmhn002508	C21H28O12	4-p-Cumaroyl-rhamnosyl-(1→6)-D-glucose	Phenolic acids	Phenolic acids	-	B	14034	15857	16776	9	9	9	1.60646	0.000578567	-10.7552	down
Lmsn012425	C30H48O4	Rubusic acid (3β,7α-Dihydroxyolean-12-en-28-oic acid)	Terpenoids	Triterpene	23984-26-1	A	37399	7100.7	15334	5002.5	25951	21727	0.131979	0.880449	-0.183689	insig
pmb1912	C20H23N7O7	10-Formyltetrahydrofuran	Alkaloids	Alkaloids	2800-34-2	B	78765	54719	61637	143940	92239	145270	1.38811	1.95494	0.967121	insig
Lmhp008233	C23H40NO7P	LysoPE 18:4	Lipids	LPE	-	A	4835.5	3196.9	5840.6	3035.4	7087.9	4909.7	0.15581	1.08362	0.115853	insig
Lmhp008589	C23H42NO7P	LysoPE 18:3(2n isomer)	Lipids	LPE	-	A	7425400	3322300	5570900	2121900	6996300	4204200	0.468575	0.816394	-0.292663	insig
Lmhp008801	C23H42NO7P	LysoPE 18:3	Lipids	LPE	-	A	4297000	2136300	3382400	1967200	6253700	2760600	0.0771651	1.11877	0.161912	insig
pmp000583	C22H20O12	Diosmetin-7-O-glucuronide	Flavonoids	Flavonoid	35110-20-4	B	906060	610900	671160	1486300	2884200	1679400	1.45716	2.76488	1.46722	up
pmb0874	C23H44NO7P	LysoPE 18:2(2n isomer)	Lipids	LPE	-	A	30136000	13909000	23153000	11036000	31849000	20624000	0.189636	0.945103	-0.0814572	insig
pmb0881	C23H44NO7P	LysoPE 18:2	Lipids	LPE	-	A	14127000	6364300	10698000	6543400	17049000	8785200	0.0266084	1.0381	0.0539449	insig
Lmmp003783	C21H18O13	Quercetin-3-O-glucuronide	Flavonoids	Flavonols	22688-79-5	B	9	9	9	110810	36439	90207	1.60003	8794.67	13.1024	up
Lmfn003760	C21H18O13	Quercetin-4′-O-glucuronide	Flavonoids	Flavonols	201463-36-7	A	3884200	3819400	3277000	484820	422690	396430	1.6033	0.118749	-3.07401	down
Hmjp003123	C21H18O13	Quercetin-5-O-glucuronide	Flavonoids	Flavonols	-	B	11934000	10114000	9314300	1245100	863580	890610	1.59888	0.0956336	-3.38634	down
Zmhn004909	C21H18O13	3,4-Digalloylshikimic acid	Phenolic acids	Phenolic acids	-	B	91751	133920	109720	13789	13883	15731	1.59486	0.12941	-2.94998	down
Lmjp003044	C22H22O12	Isorhamnetin-3-O-Glucoside*	Flavonoids	Flavonols	5041-82-7	A	12148000	12687000	10450000	433840	408880	423280	1.60604	0.0358793	-4.80071	down
Hmcp002207	C22H22O12	Isorhamnetin-7-O-glucoside (Brassicin)*	Flavonoids	Flavonols	6743-96-0	A	11732000	12408000	9892200	458300	380010	403490	1.60543	0.036489	-4.7764	down
Lmnn002886	C23H26O11	1'-O-(3,4-Dihydroxyphenethyl)-O-caffeoyl-glucoside	Phenolic acids	Phenolic acids	-	B	27182000	30744000	26740000	3654400	3309100	3588700	1.6051	0.124633	-3.00424	down
pmb2260	C23H46NO7P	LysoPC 15:1	Lipids	LPC	-	A	16793	10701	17762	7239.5	26033	10985	0.256818	0.977937	-0.0321871	insig
mws0289	C23H46NO7P	LysoPE 18:1	Lipids	LPE	89576-29-4	A	3305500	1050700	2073400	1217600	2661400	2137500	0.02309	0.93575	-0.0958045	insig
pmb0856	C23H46NO7P	LysoPE 18:1(2n isomer)	Lipids	LPE	-	A	4719700	1315800	2932800	1094700	2572200	2989000	0.410301	0.742158	-0.430201	insig
pmb0883	C23H48NO7P	LysoPE 18:0	Lipids	LPE	69747-55-3	A	143080	30120	61795	24472	89637	44725	0.433062	0.675904	-0.56511	insig
pmb2319	C23H48NO7P	LysoPC 15:0	Lipids	LPC	108273-89-8	A	119010	66030	100940	87974	179680	119830	0.769042	1.35493	0.438222	insig
pmb0880	C23H48NO7P	LysoPE 18:0(2n isomer)	Lipids	LPE	-	A	42076	13065	27875	15746	34022	28745	0.00516944	0.945757	-0.0804579	insig
Lmhp009129	C23H48NO7P	LysoPC 15:0(2n isomer)	Lipids	LPC	-	A	40128	18087	33338	23640	35513	27864	0.033138	0.950455	-0.0733099	insig
pmb3072	C22H26O12	3-O-p-Coumaroylshikimic acid-O-glucoside	Phenolic acids	Phenolic acids	-	B	31397	52493	40082	34816	19969	21809	1.18334	0.617833	-0.694711	insig
Hmyn007168	C22H45O9P	LysoPG 16:0	Lipids	Glycerol ester	-	B	9466900	3899600	5776300	2631800	6802300	6049800	0.435717	0.808863	-0.306033	insig
pmn001707	C30H46O5	Quillaic acid	Phenolic acids	Phenolic acids	631-01-6	B	826390	548570	1282000	1157500	1313400	2235100	1.08988	1.7712	0.824725	insig
Lmsp005625	C22H18O13	3-O-Methylellagic acid-4'-O-(5''-O-acetyl)arabinoside	Tannins	Tannin	-	B	9421.3	4583.1	7060.4	9	9	9	1.60452	0.00128176	-9.60766	down
Lmmn003398	C23H22O12	Kaempferol-3-O-(6''-acetyl)glucoside	Flavonoids	Flavonols	-	B	28884	23182	22602	132720	115150	96282	1.58466	4.6091	2.20448	up
pma1303	C24H46NO7P	LysoPC 16:2	Lipids	LPC	-	A	98441	63986	97930	85740	207210	126780	0.969483	1.61213	0.68897	insig
pmb0863	C24H46NO7P	LysoPC 16:2(2n isomer)	Lipids	LPC	-	A	59912	39258	69082	30273	77254	32368	0.535557	0.831461	-0.266279	insig
pmp001270	C24H48NO7P	LysoPC 16:1	Lipids	LPC	76790-27-7	A	423740	265420	419930	298370	707400	322100	0.321453	1.19726	0.259737	insig
Lmhp008833	C24H48NO7P	LysoPC 16:1(2n isomer)	Lipids	LPC	-	A	592720	296810	570540	217770	543720	289760	0.716232	0.72	-0.473932	insig
HJN054	C25H34O10	Secoisolariciresinol-9'-O-xyloside	Lignans and Coumarins	Lignans	-	B	81818	66690	70693	70150	79589	100560	0.730013	1.14187	0.191398	insig
pmb0855	C24H50NO7P	LysoPC 16:0	Lipids	LPC	17364-16-8	A	28877000	14161000	23287000	16464000	42906000	23244000	0.416662	1.24559	0.316834	insig
pmd0132	C24H50NO7P	LysoPC 16:0(2n isomer)	Lipids	LPC	-	A	5636200	2519800	4412700	2832800	6696400	3789300	0.116693	1.05966	0.0835962	insig
Lmhp010040	C25H46NO7P	LysoPE 20:3	Lipids	LPE	-	A	28262	10231	20161	10230	41778	16327	0.108995	1.16505	0.220395	insig
Lmhp009802	C25H46NO7P	LysoPE 20:3(2n isomer)	Lipids	LPE	-	A	30086	8535.2	20189	9820.9	45046	16330	0.16492	1.21062	0.275748	insig
HJAP135	C24H24O12	Pinocembrin-7-O-(6''-O-malonyl)glucoside	Flavonoids	Flavonoid	-	A	2765800	3019500	2938100	3318300	2226000	2306100	0.696976	0.899924	-0.152124	insig
Lmsn009589	C30H48O6	2α,3β,19α,23-Tetrahydroxyurs-12-en-28-oic acid	Terpenoids	Triterpene	-	B	9	9	9	1452.1	1603.8	1420.4	1.60701	165.789	7.3732	up
Lmhp010514	C25H48NO7P	LysoPE 20:2(2n isomer)	Lipids	LPE	-	A	28310	10293	16349	7661.7	32325	11652	0.241241	0.939706	-0.0897193	insig
Lmhp008718	C25H48NO7P	LysoPC 17:2	Lipids	LPC	-	A	69809	27594	60204	32236	129640	46123	0.280784	1.31973	0.400245	insig
Lmhp010757	C25H48NO7P	LysoPE 20:2	Lipids	LPE	-	A	74464	18250	42091	19265	109890	36410	0.135074	1.22818	0.296524	insig
Hmln002199	C23H22O13	Quercetin-3-O-(6''-acetyl)galactoside	Flavonoids	Flavonols	-	B	29197	29987	26805	2966.2	1853.9	9	1.21929	0.0561595	-4.15433	down
Lmhp009590	C25H50NO7P	LysoPC 17:1	Lipids	LPC	-	A	53081	18139	49191	36866	95585	50845	0.724577	1.52225	0.606208	insig
Lmhp010515	C25H52NO7P	LysoPC 17:0(2n isomer)	Lipids	LPC	-	A	42017	23264	35142	22348	38881	30843	0.267772	0.916842	-0.125255	insig
pmb2406	C25H52NO7P	LysoPC 17:0	Lipids	LPC	50930-23-9	A	22643	21301	19214	14059	23413	19249	0.583714	0.898081	-0.155083	insig
Lmhp009526	C27H46O9	2-α-Linolenoyl-glycerol-1-O-glucoside	Lipids	Glycerol ester	-	A	80810	71775	106340	94485	117980	178600	1.06891	1.51034	0.594874	insig
Lmhp009773	C27H46O9	1-α-Linolenoyl-glycerol-3-O-glucoside	Lipids	Glycerol ester	-	A	186970	100590	190430	170740	325770	197380	0.886077	1.45168	0.537727	insig
Hmqp006235	C26H46NO7P	LysoPC 18:4	Lipids	LPC	-	A	26945	13562	24537	9839.4	32709	11356	0.504664	0.828737	-0.271013	insig
Zmhn000785	C19H32O16	Di-O-Glucosylquinic acid	Phenolic acids	Phenolic acids	-	A	71300	124420	76038	227210	66908	146330	0.699647	1.62074	0.696649	insig
Lmhp010334	C27H48O9	2-Linoleoylglycerol-1-O-glucoside	Lipids	Glycerol ester	-	A	4686.8	1063.5	4239.7	2142.4	7624	6582.3	0.645243	1.63651	0.710619	insig
Lmhp010573	C27H48O9	1-Linoleoylglycerol-3-O-glucoside	Lipids	Glycerol ester	-	A	6466.7	2140.1	5065.6	4232.2	15247	7737	0.890326	1.99059	0.993199	insig
pmb0865	C26H48NO7P	LysoPC 18:3(2n isomer)	Lipids	LPC	-	A	15047000	10215000	16865000	10737000	22890000	11637000	0.111654	1.07447	0.103619	insig
pmb0854	C26H48NO7P	LysoPC 18:3	Lipids	LPC	-	A	14216000	9773900	15629000	10568000	24512000	11599000	0.303201	1.1782	0.236585	insig
Hmbn002692	C22H30O14	6'-O-Feruloyl-D-sucrose	Phenolic acids	Phenolic acids	118230-77-6	B	690060	514070	568010	1051500	592530	527920	0.517125	1.22561	0.293498	insig
pmp001251	C26H50NO7P	LysoPC 18:2(2n isomer)	Lipids	LPC	-	A	3154300	1505700	2935800	1395900	4967200	2105300	0.0454677	1.11488	0.156887	insig
pmp001273	C26H50NO7P	LysoPC 18:2	Lipids	LPC	-	A	1409100	876300	1382200	1001200	2507300	1139900	0.428885	1.26742	0.341898	insig
Li512111	C24H24O13	Isorhamnetin-3-O-(6''-acetylglucoside)	Flavonoids	Flavonols	-	B	55913	76793	64429	2588.5	9	9	1.42349	0.0132219	-6.24093	down
Lmhp010190	C26H52NO7P	LysoPC 18:1(2n isomer)	Lipids	LPC	-	A	45722000	16699000	39712000	16024000	44715000	28779000	0.226367	0.876485	-0.190199	insig
pmp001281	C26H52NO7P	LysoPC 18:1	Lipids	LPC	-	A	16734000	7284800	16048000	8291800	17791000	10832000	0.144487	0.921331	-0.118208	insig
mws0126	C26H54NO7P	LysoPC 18:0	Lipids	LPC	19420-57-6	A	830230	321110	586550	272160	780920	422500	0.340134	0.849064	-0.236055	insig
pmd0136	C26H54NO7P	LysoPC 18:0(2n isomer)	Lipids	LPC	-	A	151770	61631	114160	34820	72905	38227	1.19889	0.445572	-1.16627	down
Lmhp007840	C27H52NO7P	LysoPC 19:2	Lipids	LPC	-	A	44823	14032	29432	6838.4	33061	21970	0.555749	0.700776	-0.512975	insig
Lmhp007598	C27H52NO7P	LysoPC 19:2(2n isomer)	Lipids	LPC	-	A	5566.7	5536.6	6649.5	7641.1	16407	18184	1.32873	2.3789	1.25029	up
pmp000587	C24H22O14	Luteolin-7-O-(6''-malonyl)glucoside	Flavonoids	Flavonoid	-	A	9	2258.5	2261.3	17920	11612	24509	1.16915	11.9327	3.57685	up
Lmdp004892	C24H22O14	Kaempferol-3-O-(6''-malonyl)galactoside	Flavonoids	Flavonols	-	A	390930	378880	407810	2022500	2663000	3069300	1.59443	6.58515	2.71922	up
Lmhp010908	C27H54NO7P	LysoPC 19:1	Lipids	LPC	-	A	36585	7942	22575	8736.6	41794	16351	0.0290671	0.996715	-0.00474641	insig
Zmfn000481	C14H22N2O16P2	Uridine-5'-Diphosphate-D-Xylose	Nucleotides and derivatives	Nucleotides and derivatives	3616-06-6	B	404230	326290	367780	344950	487600	286510	0.00515613	1.0189	0.0270152	insig
pmb0824	C25H28O13	Syringic acid-4-O-(6''-feruloyl)glucoside	Phenolic acids	Phenolic acids	-	B	157590	163950	171920	35030	34288	44227	1.59676	0.2301	-2.11967	down
pmb2228	C27H56NO7P	LysoPC 19:0	Lipids	LPC	108273-88-7	A	3786.2	5280.8	3504.1	6144.6	5358.5	4290.2	0.936999	1.25632	0.329202	insig
Lmdn001925	C26H34O12	Olivil-4'-O-glucoside	Lignans and Coumarins	Lignans	76880-93-8	B	72940	90950	62259	99834	95267	79423	0.986712	1.21391	0.279659	insig
pmp001282	C28H50NO7P	Propyl 2-(trimethylammonio)ethyl phosphate	Others	Others	-	A	1607300	713450	1587900	811950	1791900	1008000	0.150806	0.924066	-0.113932	insig
Lmhp009890	C28H52NO7P	LysoPC 20:3	Lipids	LPC	1199257-41-4	A	73878	37643	60102	34876	101590	43636	0.0377595	1.0494	0.0695713	insig
pmd0147	C28H54NO7P	LysoPC 20:2	Lipids	LPC	-	A	177510	84381	130850	78856	292860	117180	0.210612	1.24483	0.315949	insig
pmd0146	C28H54NO7P	LysoPC 20:2(2n isomer)	Lipids	LPC	-	A	69907	29820	59599	24436	91141	32121	0.286792	0.927018	-0.109331	insig
pmb0608	C25H24O14	Chrysoeriol-7-O-(6''-malonyl)glucoside	Flavonoids	Flavonoid	-	A	21429	18595	20719	102480	48679	87248	1.50745	3.92485	1.97264	up
Lmhp011549	C28H56NO7P	LysoPC 20:1	Lipids	LPC	-	A	55967	20263	37285	18088	67089	31659	0.0400567	1.02926	0.0416019	insig
Hmln002189	C24H22O15	Quercetin-3-O-(6''-malonyl)galactoside	Flavonoids	Flavonols	-	A	50638	60414	43049	9	9	9	1.6063	0.00017521	-12.4786	down
mws1138	C24H26N2O13	Betanin (Betanidin-5-O-glucoside)	Alkaloids	Alkaloids	7659-95-2	B	61594	57765	66809	2526.2	5640.2	3031.5	1.57894	0.0601494	-4.05531	down
Rfmb25702	C28H34O12	Pinoresinol-4-O-(6''-acetyl)glucoside	Lignans and Coumarins	Lignans	-	B	119570	147060	106580	69866	77697	134320	0.924848	0.755293	-0.404891	insig
HJAP064	C25H24O15	Isorhamnetin-3-O-(6''-malonylglucoside)	Flavonoids	Flavonoid	-	B	311220	291540	279590	18891	10648	14363	1.60022	0.0497558	-4.32899	down
pmb2922	C15H24N2O17P2	Uridine 5'-diphospho-D-glucose	Nucleotides and derivatives	Nucleotides and derivatives	133-89-1	A	1442800	1631400	1603600	1522700	1610400	1428500	0.352651	0.975159	-0.0362902	insig
Lmmp003306	C25H26O15	Quercetin-3-O-xylosyl(1→2)arabinoside	Flavonoids	Flavonols	-	A	1749400	1498700	1232900	32109	32363	36613	1.60478	0.0225586	-5.47018	down
mws0047	C27H30O14	Apigenin-7-O-neohesperidoside (Rhoifolin)	Flavonoids	Flavonoid	17306-46-6	B	60804	49385	54581	35303	50194	37921	1.2266	0.749032	-0.416901	insig
Lmnp002741	C27H30O14	Genkwanin-6-C-(2''-O-apiosyl)glucoside	Flavonoids	Flavonoid carbonoside	-	B	146400	175820	122470	9	9	9	1.60635	6.07165e-05	-14.0076	down
HJAP148	C26H28O15	Kaempferol-3-O-sambubioside	Flavonoids	Flavonoid	27661-51-4	A	734430	921880	965810	17980000	15097000	15332000	1.60293	18.4618	4.20647	up
pmb0492	C34H37N3O6	N',N'',N'''-p-Coumaroyl-cinnamoyl-caffeoyl spermidine	Alkaloids	Phenolamine	-	B	364580	102530	178570	88056	250620	238820	0.122538	0.8944	-0.161008	insig
Hmgp003641	C28H32O14	Chrysoeriol-6-C-rhamnoside-7-O-rhamnoside	Flavonoids	Flavonoid	-	B	36602	83414	70771	12988	11137	16137	1.50795	0.211031	-2.24447	down
pmp001288	C28H32O14	Acacetin-7-O-rutinoside (Linarin)	Flavonoids	Flavonoid	480-36-4	A	1298300	2763700	2393800	442270	364960	454500	1.53495	0.195441	-2.35519	down
mws1290	C30H26O13	Kaempferol-3-O-(6''-p-Coumaroyl)glucoside (Tiliroside)	Flavonoids	Flavonols	20316-62-5	B	45738	60313	58841	9	9	9	1.60617	0.000163744	-12.5763	down
Hmjn004446	C30H26O13	Luteolin-7-O-(6''-caffeoyl)rhamnoside	Flavonoids	Flavonoid	-	B	500750	480690	465450	596500	622230	914860	1.28498	1.4746	0.560328	insig
Lmsp004670	C27H30O15	Kaempferol-3-O-glucoside-7-O-rhamnoside	Flavonoids	Flavonols	-	A	317260	461780	539190	2012700	1668700	1729600	1.56556	4.10475	2.03729	up
pmp001079	C27H30O15	Luteolin-7-O-neohesperidoside (Lonicerin)*	Flavonoids	Flavonoid	25694-72-8	A	9193.2	14448	3775.7	221730	133500	102020	1.53146	16.6777	4.05985	up
pmp000593	C27H30O15	Luteolin-7-O-rutinoside*	Flavonoids	Flavonoid	3563-98-2	A	81157	95822	112230	2079900	1538300	1407800	1.59731	17.3784	4.11923	up
Lmjp002867	C27H30O15	Kaempferol-3-O-neohesperidoside*	Flavonoids	Flavonols	32602-81-6	A	320770	486920	555020	1708900	1465900	1939100	1.55047	3.75274	1.90795	up
Lmsn002815	C27H30O15	Kaempferol-3-O-rutinoside(Nicotiflorin)*	Flavonoids	Flavonoid	17650-84-9	A	496360	739770	972130	3995000	4965400	5280600	1.57161	6.44897	2.68907	up
Zmcp003989	C27H30O15	Kaempferol-3-O-rhamnosyl(1→2)glucoside	Flavonoids	Flavonoid	-	A	8299.6	6830.3	1016.9	1001900	1309500	938900	1.56179	201.297	7.65318	up
Lmjp002596	C26H28O16	Quercetin-3-O-sambubioside	Flavonoids	Flavonols	83048-35-5	A	752730	858200	868650	12071	26853	28696	1.5849	0.0272707	-5.1965	down
Lmtp004044	C26H28O16	Quercetin-3-O-apiosyl(1→2)galactoside	Flavonoids	Flavonols	-	B	22354000	18981000	21271000	486360	520990	577600	1.60589	0.0253163	-5.30379	down
Lmqn000780	C17H27N3O17P2	Uridine 5'-diphospho-N-acetylglucosamine	Alkaloids	Alkaloids	528-04-1	B	21566	21320	27935	28248	28182	21294	0.54972	1.09747	0.134183	insig
Hmjp003008	C27H28O16	Luteolin-7-O-glucuronide-5-O-rhamnoside	Flavonoids	Flavonoid	-	A	2691900	2259600	2063300	13013000	19432000	18961000	1.59018	7.32822	2.87346	up
pmp001080	C28H32O15	Diosmetin-7-O-Neohesperidoside (Neodiosmin)	Flavonoids	Flavonoid	38665-01-9	B	195470	158750	149520	123100	204460	153660	0.268374	0.955294	-0.0659827	insig
Lmmp003091	C27H30O16	Quercetin-3-O-(4''-O-glucosyl)rhamnoside	Flavonoids	Flavonols	59262-54-3	B	218000	143840	127850	5008.5	8681.6	7796	1.58805	0.0438769	-4.51039	down
Lmsp004166	C27H30O16	Quercetin-3-O-glucoside-7-O-rhamnoside	Flavonoids	Flavonols	-	B	2720200	2949600	2995700	51296	36388	60012	1.60394	0.0170441	-5.87458	down
mws0059	C27H30O16	Quercetin-3-O-rutinoside (Rutin)	Flavonoids	Flavonols	153-18-4	A	1241300	1333000	1219600	22462	18558	27701	1.60498	0.0181136	-5.78679	down
Lmbp002336	C27H30O16	Quercetin-3-O-(2''-O-rhamnosyl)galactoside	Flavonoids	Flavonols	-	B	3291700	4704700	4336900	162950	111300	179410	1.59843	0.0367833	-4.7648	down
Lmjp002461	C27H30O16	Quercetin-3-O-neohesperidoside	Flavonoids	Flavonols	117611-67-3	A	2366000	3221700	3116600	57211	41762	55138	1.60361	0.0177052	-5.81969	down
Lmyn001269	C27H30O16	Kaempferol-3-O-sophoroside	Flavonoids	Flavonoid	19895-95-5	B	592550	396070	564030	516810	653180	369670	0.0694907	0.991634	-0.0121209	insig
mws4134	C20H32N6O12S2	Oxiglutatione	Amino acids and derivatives	Amino acids and derivatives	27025-41-8	A	1854200	1791700	1837800	1360700	1245000	1714500	1.2795	0.787826	-0.344052	insig
Rfmb26201	C30H38O14	Syringaresinol-4'-O-(6''-acetyl)glucoside	Lignans and Coumarins	Lignans	-	B	46774	84940	46635	75200	35905	75406	0.0652098	1.04576	0.0645576	insig
Hmjp002999	C28H32O16	Isorhamnetin-3-O-rutinoside (Narcissin)	Flavonoids	Flavonoid	604-80-8	B	4415900	3733300	4443200	45029	108530	78898	1.59038	0.0184601	-5.75945	down
Zmxp002867	C28H32O16	Chrysoeriol-5,7-di-O-glucoside	Flavonoids	Flavonoid	-	B	194490	134560	214320	31899	15636	58263	1.46765	0.194707	-2.36062	down
Lmsp004045	C28H32O16	Isorhamnetin-3-O-glucoside-7-O-rhamnoside	Flavonoids	Flavonols	-	A	8974.5	13646	22480	1581.8	5311	4198.5	1.34717	0.245924	-2.02371	down
pme1540	C28H32O16	Isorhamnetin-3-O-neohesperidoside	Flavonoids	Flavonols	55033-90-4	A	21845	25916	14656	5808.8	4753.5	2077.5	1.47516	0.202506	-2.30397	down
Hmln002149	C29H36O15	Acteoside	Phenolic acids	Phenolic acids	61276-17-3	B	10562	8530.2	6505.6	9	9	11479	1.10078	0.44914	-1.15476	down
pmp000596	C27H30O17	Quercetin-3-O-(2''-O-galactosyl)glucoside	Flavonoids	Flavonols	56782-99-1	A	9	9	9	17268	14800	26272	1.60459	2160.74	11.0773	up
Lmtp003677	C27H30O17	Quercetin-3-O-sophoroside (Baimaside)	Flavonoids	Flavonols	18609-17-1	B	31677	35542	49400	4618.2	9	9	1.34941	0.0397551	-4.65272	down
Lmsp003729	C27H30O17	Myricetin-3-O-rutinoside	Flavonoids	Flavonols	-	B	76104	148110	113890	9	9	9	1.60481	7.98571e-05	-13.6122	down
Hmlp002975	C28H30O17	Isorhamnetin-3-O-glucuronide-7-O-rhamnoside	Flavonoids	Flavonols	-	B	441220	362170	365020	7448.2	13143	20425	1.58175	0.0351043	-4.83221	down
Lmmp002560	C27H28O18	Quercetin-3-O-(2''-O-glucosyl)glucuronide	Flavonoids	Flavonols	-	B	242200	143980	208460	9	9	9	1.60646	4.54056e-05	-14.4268	down
Hmcp001578	C28H32O17	Isorhamnetin-3,7-O-diglucoside	Flavonoids	Flavonols	6758-51-6	B	62465	74053	69959	9	9	9	1.60653	0.000130765	-12.9007	down
mws1506	C29H36O16	Plantamajoside	Phenolic acids	Phenolic acids	104777-68-6	B	10630	14641	13267	12619	12305	16586	0.428971	1.07712	0.107177	insig
pmb0530	C21H27N7O14P2	Nicotinic acid adenine dinucleotide	Nucleotides and derivatives	Nucleotides and derivatives	53-84-9	A	2433400	3373600	3287900	3537500	3000600	3047000	0.403677	1.0539	0.0757357	insig
Lmhp008744	C33H56O14	1-α-Linolenoyl-glycerol-2,3-di-O-glucoside	Lipids	Glycerol ester	-	A	206500	112820	200860	110460	288130	265270	0.430536	1.27621	0.351868	insig
Lmhp008513	C33H56O14	2-α-Linolenoyl-glycerol-1,3-di-O-glucoside	Lipids	Glycerol ester	-	A	316490	207920	356140	242530	381650	480270	0.617014	1.25427	0.326851	insig
Lmhp009190	C33H58O14	2-Linoleoylglycerol-1,3-di-O-glucoside	Lipids	Glycerol ester	-	A	26008	8628.5	17743	18459	30982	39617	0.948806	1.70025	0.765743	insig
Lmhp009384	C33H58O14	1-Linoleoylglycerol-2,3-di-O-glucoside	Lipids	Glycerol ester	-	A	13203	7520.5	10402	10621	17990	13712	0.924249	1.35975	0.443345	insig
Lmmn004145	C38H60O10	3-O-(2-O-Acetyl-glucosyl)oleanolic acid	Terpenoids	Triterpene	-	A	9064000	4368700	10024000	8279200	14132000	13660000	0.959154	1.53778	0.620847	insig
Lmsn006130	C36H56O12	2α,3β,19α-Trihydroxyurs-12-en-23,28-dioic acid-28-O-glucoside	Terpenoids	Triterpene	-	A	10729	8946.6	14029	10315	9366.7	10224	0.584939	0.887288	-0.172525	insig
Lmmp003266	C29H30O19	Quercetin-3-O-(2''-malonyl)glucoside-7-O-arabinoside	Flavonoids	Flavonols	-	A	43505	41544	48434	9	9	9	1.60672	0.000202273	-12.2714	down
pmn001370	C32H42O16	Pinoresinol-4,4'-O-di-O-glucoside	Lignans and Coumarins	Lignans	63902-38-5	B	117520	120470	118920	152670	193850	282140	1.33766	1.7614	0.81672	insig
pmn001368	C32H44O17	Olivil-4,4'-Di-O-glucoside	Lignans and Coumarins	Lignans	-	B	86754	94742	69574	126340	184070	181520	1.46633	1.95933	0.970363	insig
Xmyp004678	C32H38O19	Kaempferol-3-O-(2-O-Xylosyl-6-O-Rhamnosyl)Glucoside	Flavonoids	Flavonoid	-	A	13974	13058	9034.8	9	9	9	1.6059	0.000748611	-10.3835	down
Zmlp003063	C33H40O19	Luteolin-7-O-(2''-O-rhamnosyl)rutinoside	Flavonoids	Flavonoid	-	B	8855.4	7764	10409	1478400	1940800	1648200	1.60599	187.484	7.55063	up
Lmsp003881	C33H40O19	Kaempferol-3-O-rutinoside-7-O-rhamnoside	Flavonoids	Flavonols	-	A	298620	245850	243490	34079000	44712000	36298000	1.6059	146.059	7.19041	up
mws1035	C33H40O19	Kaempferol-3-O-robinoside-7-O-rhamnoside (Robinin)	Flavonoids	Flavonols	301-19-9	B	16018	25159	23141	20867	14279	27684	0.146312	0.976865	-0.033769	insig
HJAP061	C32H38O20	Quercetin-3-O-(2''-O-arabinosyl)rutinoside	Flavonoids	Flavonols	-	A	2089800	1123500	2271500	87635	110380	108220	1.58586	0.0558334	-4.16273	down
Hmcp001618	C32H38O20	Quercetin-3-O-(2''-O-Xylosyl)rutinoside	Flavonoids	Flavonols	129235-39-8	B	47203	30968	43993	9	9	9	1.60643	0.000221014	-12.1436	down
Hmqp002870	C32H38O20	Luteolin-7-O-Sophoroside-5-O-arabinoside	Flavonoids	Flavonoid	-	B	5590	11626	10916	1916500	2723300	1748500	1.60153	227.083	7.82708	up
pme2651	C21H28N7O17P3	NADP (Nicotinamide adenine dinucleotide phosphate)	Nucleotides and derivatives	Nucleotides and derivatives	53-59-8	B	582450	478780	842650	287250	435530	553500	1.00009	0.670357	-0.576998	insig
Lmyp003857	C35H28O19	Kaempferol-3-O-(2'',6''-digalloyl)glucoside	Flavonoids	Flavonoid	-	B	9325.2	13907	15691	918740	775950	832610	1.60229	64.9304	6.02082	up
Lnrp102163	C33H40O20	Quercetin-3-O-rutinoside-7-O-rhamnoside	Flavonoids	Flavonols	-	A	25632	11608	8902.5	9	4601.2	2548.8	1.01746	0.15515	-2.68827	down
pmp001105	C33H40O20	Kaempferol-3-O-neohesperidoside-7-O-glucoside	Flavonoids	Flavonols	-	A	53668	70319	84472	63572	140880	128080	0.987267	1.59519	0.67373	insig
Hmcp001559	C33H40O20	Isorhamnetin-3-O-rutinoside-7-O-arabinoside	Flavonoids	Flavonols	-	B	36914	31891	25585	9	9	9	1.60652	0.000286047	-11.7715	down
HJAP127	C33H40O20	Quercetin-3-O-(2''-O-Rhamnosyl)rutinoside	Flavonoids	Flavonols	55696-57-6	A	5382000	8708400	7869800	183240	127050	213780	1.59722	0.0238645	-5.38899	down
Hmcp001329	C32H38O21	Quercetin-3-O-xylosyl(1→2)glucosyl(1→2)glucoside	Flavonoids	Flavonols	-	A	10900	20507	16947	9	9	9	1.604	0.000558382	-10.8065	down
pmn001505	C41H64O13	Oleanolic acid-3-O-xylosyl(1→3)glucuronide	Terpenoids	Triterpene	-	A	137030	34713	97060	56503	149810	121710	0.412406	1.22031	0.287248	insig
Lmyp003588	C35H28O20	Quercetin-3-O-(2'',6''-digalloyl)-glucoside	Flavonoids	Flavonols	-	B	26721	28190	36707	21734	10690	14611	1.35845	0.513382	-0.961896	insig
HJAP128	C34H42O20	Isorhamnetin-3-O-rutinoside-7-O-rhamnoside	Flavonoids	Flavonoid	-	A	981320	1153000	1022000	154860	199240	283860	1.56602	0.202121	-2.30671	down
HJAP023	C33H40O21	Kaempferol-6,8-di-C-glucoside-7-O-glucoside	Flavonoids	Flavonoid	-	B	20349	16252	14880	9	9	9	1.60665	0.000524465	-10.8969	down
pme2746	C27H33N9O15P2	Riboflavin 5'-Adenosine Diphosphate	Nucleotides and derivatives	Nucleotides and derivatives	146-14-5	A	1812300	1852000	1973300	1775600	1551700	1808600	1.06806	0.911008	-0.134464	insig
Hmcp001589	C34H42O21	Isorhamnetin-3-O-rutinoside-4'-O-glucoside	Flavonoids	Flavonols	111393-97-6	B	137340	149950	153230	9	9	9	1.60667	6.12912e-05	-13.994	down
Lmhp003162	C34H42O21	Chrysoeriol-6,8-di-C-glucoside-4'-O-glucoside	Flavonoids	Flavonoid	-	B	46111	47144	55699	9	9	9	1.60658	0.000181264	-12.4296	down
pmb0676	C38H40O19	Chrysoeriol-8-C-glucoside-7-O-(6''-feruloyl)glucoside	Flavonoids	Flavonoid carbonoside	-	B	4702.7	6503.1	8269.3	363060	271740	246270	1.59812	45.2408	5.49955	up
Lmhp002374	C39H50O25	Quercetin-3-O-glucosyl(1→4)rhamnoside-7-O-rutinoside	Flavonoids	Flavonols	-	B	46702	65998	50323	9	9	9	1.60602	0.000165621	-12.5598	down
HJAP123	C40H52O25	Isorhamnetin-3-O-rutinoside-7-O-rutinoside	Flavonoids	Flavonoid	-	A	9083.2	20220	10548	2820.7	261.7	4422.7	1.23462	0.188328	-2.40868	down
