# Supplementary material for: Elucidating the Differentiation Synthesis Mechanisms of Differently Colored Resistance Quinoa Seedings Using Metabolite Profiling and Transcriptome Analysis
Source: Metabolites. 2023 Oct 10;13(10):1065. doi: 10.3390/metabo13101065 (PMC10609267; doi:10.3390/metabo13101065)
Supplement: Supplementary file 1 [file metabolites-13-01065-s001.zip › Table S3.xlsx]

## Sheet: Sheet1
Table S3 All metabolites in R-RvsR-Y
Index	Formula	Compounds	Class I	Class II	CAS	Level	R-R1	R-R2	R-R3	R-Y1	R-Y2	R-Y3	VIP	Fold_Change	Log2FC	Type
pme3200	C2H7N3	1-methylguanidine	Nucleotides and derivatives	Nucleotides and derivatives	471-29-4	B	40113	27467	26454	9	7407.1	1621.1	1.08911	0.0961057	-3.37923	down
pmb0782	C5H11N	Piperidine	Alkaloids	Alkaloids	110-89-4	B	4880600	4785100	4760100	6647500	5651100	4543000	0.840187	1.16746	0.223378	insig
pme2292	C4H12N2	Putrescine	Alkaloids	Phenolamine	110-60-1	B	103760	37011	52903	18474	24507	22325	1.26922	0.337195	-1.56834	down
pme1987	C3H7NO2	L-Alanine	Amino acids and derivatives	Amino acids and derivatives	56-41-7	B	3594.6	3233.3	2721.7	7282.6	3732.9	565.28	0.183401	1.2127	0.27822	insig
ML10198895	C3H7NO2	N-Methylglycine	Amino acids and derivatives	Amino acids and derivatives	107-97-1	B	20050	12981	20779	20166	22550	14793	0.262541	1.06874	0.0959134	insig
pme2601	C3H6O3	3-Hydroxypropanoic acid	Organic acids	Organic acids	503-66-2	B	36558	45190	35952	44275	30196	15535	0.66873	0.764707	-0.387021	insig
Lmqp000873	C4H4O3	Succinic anhydride	Organic acids	Organic acids	108-30-5	B	1886700	2048100	1465100	2383500	1494700	1156600	0.27217	0.932388	-0.100998	insig
mws4052	C4H7NO2	1-Aminocyclopropane-1-carboxylic acid	Organic acids	Organic acids	22059-21-8	B	504300	559760	531010	492820	519960	474420	0.945427	0.932373	-0.101021	insig
pme1841	C5H14N2	Cadaverine	Alkaloids	Phenolamine	462-94-2	B	7716.9	4021.6	4593.8	11250	10097	10076	1.26325	1.92398	0.944093	insig
pme3011	C4H9NO2	γ-Aminobutyric acid	Organic acids	Organic acids	56-12-2	B	405570	412670	524620	436970	450690	348680	0.470422	0.920677	-0.119233	insig
pme3017	C4H9NO2	2-Aminoisobutyric acid	Amino acids and derivatives	Amino acids and derivatives	62-57-7	B	3700300	1767500	3457100	1578800	1496600	1423000	1.19192	0.504028	-0.988424	insig
pme3033	C4H9NO2	N,N-Dimethylglycine	Amino acids and derivatives	Amino acids and derivatives	1118-68-9	B	468520	296270	422150	328870	309860	265960	0.955129	0.762204	-0.391752	insig
pmb0484	C5H13NO	Choline	Alkaloids	Alkaloids	62-49-7	B	26383000	16152000	25387000	15254000	15319000	14851000	1.14835	0.668767	-0.580424	insig
ML10172161	C3H4O4	Hydroxypyruvic acid	Organic acids	Organic acids	1113-60-6	B	238970	294320	325860	397220	612030	430840	1.23608	1.67618	0.745177	insig
mws0576	C4H8O3	3-Hydroxybutyric acid	Organic acids	Organic acids	300-85-6	B	271270	255410	291200	381320	519540	327900	1.1912	1.50237	0.587242	insig
mws0574	C4H8O3	2-Hydroxyisobutyric acid	Organic acids	Organic acids	594-61-6	A	2085100	1972300	2426200	2112000	2140400	2035000	0.310526	0.969739	-0.0443315	insig
pme1975	C3H4O4	Malonic acid	Organic acids	Organic acids	141-82-2	B	980330	1058500	866560	1200500	1522100	1122000	1.15354	1.32326	0.404102	insig
pme0048	C2H7NO2S	2-Aminoethanesulfinic acid	Organic acids	Organic acids	300-84-5	B	4818.7	4770.9	2181.3	3204.9	1900.1	9	0.722959	0.434461	-1.2027	insig
mws0255	C4H5N3O	Cytosine	Nucleotides and derivatives	Nucleotides and derivatives	71-30-7	B	10215000	4088000	4845300	1588800	1975900	1433100	1.34457	0.261005	-1.93785	down
pme0257	C4H4N2O2	Uracil	Nucleotides and derivatives	Nucleotides and derivatives	66-22-8	A	99523	135080	124040	267270	216050	141420	1.19202	1.74196	0.800707	insig
pme0006	C5H9NO2	L-Proline	Amino acids and derivatives	Amino acids and derivatives	147-85-3	B	32596000	38238000	37415000	43104000	35612000	28489000	0.0635493	0.990356	-0.0139815	insig
mws0376	C4H4O4	Fumaric acid	Organic acids	Organic acids	110-17-8	B	76850	54933	48050	52380	40026	20725	0.915926	0.629089	-0.668663	insig
pme0275	C5H8O3	4-Oxopentanoic Acid	Organic acids	Organic acids	123-76-2	B	15288	11050	11861	4741.2	6876.6	7913	1.32837	0.511291	-0.967784	insig
mws0823	C5H8O3	3-Methyl-2-Oxobutanoic acid	Organic acids	Organic acids	759-05-7	B	81993	69378	71250	22968	49129	28496	1.30769	0.451858	-1.14606	down
pme3193	C4H7NO3	N-Acetyl-L-glycine	Amino acids and derivatives	Amino acids and derivatives	543-24-8	B	6827.4	7085.4	6837.7	14347	4421.6	6333.1	0.185245	1.20969	0.274639	insig
pmb1096	C8H7N	Indole	Alkaloids	Plumerane	120-72-9	A	7842.8	6569.1	8157.9	14107	14400	8945.3	1.22261	1.6594	0.730661	insig
pme0120	C5H11NO2	5-Aminovaleric acid	Amino acids and derivatives	Amino acids and derivatives	660-88-8	B	11353	13196	19028	12902	11966	19097	0.0228102	1.0089	0.0127886	insig
mws0256	C5H11NO2	L-Valine	Amino acids and derivatives	Amino acids and derivatives	72-18-4	B	9042800	8205800	8289900	10259000	8655800	7063900	0.0846603	1.01724	0.0246554	insig
mws0191	C5H11NO2	Betaine	Alkaloids	Alkaloids	107-43-7	A	639970	599310	492180	680220	594730	596570	0.627451	1.08089	0.112221	insig
pme1730	C4H6O4	D-Erythronolactone	Organic acids	Organic acids	15667-21-7	B	491170	710690	592100	1051000	622680	507720	0.518007	1.21597	0.282107	insig
mws0470	C4H6O4	Methylmalonic acid*	Organic acids	Organic acids	516-05-2	A	6884400	6470900	4624700	6805900	4012500	3085300	0.683477	0.773287	-0.370924	insig
mws0192	C4H6O4	Succinic acid*	Organic acids	Organic acids	110-15-6	A	7066100	6749400	4639800	6890600	4075700	3066700	0.695861	0.760378	-0.395212	insig
mws0147	C5H10O3	β-Hydroxyisovaleric acid	Organic acids	Organic acids	625-08-1	B	810820	522520	694190	471020	629920	315050	0.922672	0.698382	-0.517912	insig
pme3096	C3H5NO4	Aminomalonic acid	Organic acids	Organic acids	1068-84-4	B	5923700	5677100	3978800	6161700	3825900	2896000	0.551546	0.826953	-0.274122	insig
mws0230	C4H9NO3	L-Threonine	Amino acids and derivatives	Amino acids and derivatives	72-19-5	B	1410600	1338700	1384900	1415400	1330900	1156100	0.61731	0.943931	-0.0832465	insig
pmp001287	C8H9N	N-Benzylmethylene isomethylamine	Alkaloids	Alkaloids	-	A	5425000	5407500	6056600	15297000	11142000	6170700	1.12263	1.93081	0.949209	insig
pma0134	C4H8O4	D-(-)-Threose	Others	Saccharides and Alcohols	95-43-2	B	65541	52116	53302	85721	80394	48872	0.717723	1.25754	0.330599	insig
pme0195	C3H7NO2S	L-Cysteine	Amino acids and derivatives	Amino acids and derivatives	52-90-4	B	5236.7	8736.4	7644.7	2824.5	6901.9	12853	0.215467	1.04448	0.0627874	insig
pmb0069	C7H7NO	Benzamide	Phenolic acids	Phenolic acids	55-21-0	B	31712000	30514000	33033000	47135000	24667000	11821000	0.440567	0.877849	-0.187956	insig
mws0491	C8H11N	Phenethylamine	Alkaloids	Alkaloids	64-04-0	A	10039000	9352500	10438000	16134000	7601900	3274900	0.403613	0.905506	-0.143203	insig
pme0241	C7H6O2	Benzoic acid	Phenolic acids	Phenolic acids	65-85-0	B	33194	25686	23205	14025	21788	12472	1.19818	0.588232	-0.765544	insig
Lmbn001930	C7H6O2	2-Hydroxybenzaldehyde (Salicylaldehyde)	Phenolic acids	Phenolic acids	90-02-8	B	51779	36896	53394	29814	38405	21311	1.11191	0.630187	-0.666149	insig
mws0628	C7H6O2	4-Hydroxybenzaldehyde	Phenolic acids	Phenolic acids	123-08-0	B	228390	193360	299920	111880	213260	267020	0.621388	0.820541	-0.285352	insig
mws0133	C6H6N2O	Nicotinamide	Others	Vitamin	98-92-0	A	2351200	3225100	2312900	2506500	2498400	2808400	0.0198594	0.990379	-0.013947	insig
ML10179289	C8H10O	2-Phenylethanol	Phenolic acids	Phenolic acids	60-12-8	B	19580000	18542000	21317000	31096000	15435000	6766400	0.410204	0.896674	-0.157345	insig
pme1216	C6H5NO2	2-Picolinic acid	Organic acids	Organic acids	98-98-6	B	429770	120240	163300	133420	97584	105370	0.907734	0.471568	-1.08446	insig
Lmbp000668	C6H5NO2	Isonicotinic acid	Organic acids	Organic acids	55-22-1	B	722860	262460	320070	255930	199070	205490	1.0047	0.505971	-0.982872	insig
pme0490	C6H5NO2	Nicotinic acid (Vitamin B3)	Others	Vitamin	59-67-6	B	722890	236320	322320	241350	212380	208670	0.944317	0.516882	-0.952093	insig
mws0566	C7H8O2	4-Methylcatechol	Phenolic acids	Phenolic acids	452-86-8	B	356.62	359.95	710.25	720.93	712.53	353.46	0.509799	1.25238	0.324672	insig
pmb0302	C2H8NO3P	2-Aminoethylphosphonate	Lipids	Glycerol ester	2041-14-7	B	11263	16312	13654	18395	10949	13272	0.139152	1.03364	0.0477357	insig
pmp001086	C6H6O3	5-Hydroxymethylfurfural	Phenolic acids	Phenolic acids	67-47-0	B	36692	62071	42636	76239	53492	56808	0.933629	1.31924	0.399705	insig
NK10264324	C6H6O3	1,3,5-Benzenetriol	Phenolic acids	Phenolic acids	108-73-6	B	36333	24642	23252	65521	21061	9	0.558905	1.02807	0.0399343	insig
pmp000509	C6H6O3	Maltol	Others	Others	118-71-8	B	804920	702230	841980	9	9	9	1.47228	1.14936e-05	-16.4088	down
mws0251	C5H6N2O2	Thymine	Nucleotides and derivatives	Nucleotides and derivatives	65-71-4	B	17537	12692	18300	14741	25000	18258	0.546193	1.19514	0.257181	insig
Lmbn000612	C5H7NO3	1-Pyrroline-4-hydroxy-2-carboxylic acid	Organic acids	Organic acids	9054-77-7	B	1625.7	3841.2	886.43	3317.1	3017.1	2848.3	0.814122	1.44531	0.531374	insig
mws0263	C5H7NO3	5-Oxo-L-Proline	Amino acids and derivatives	Amino acids and derivatives	98-79-3	A	4507.1	9	3025.4	5815	15876	4066.1	0.780374	3.41538	1.77205	insig
ML10181668	C6H11NO2	Cycloleucine*	Amino acids and derivatives	Amino acids and derivatives	52-52-8	B	16591000	11536000	11441000	13805000	18163000	9548700	0.097456	1.04925	0.0693576	insig
Rfmb319	C6H11NO2	Pipecolic acid*	Amino acids and derivatives	Amino acids and derivatives	4043-87-2	B	5718100	2988100	3271300	3926000	5431000	2405200	0.0722252	0.982025	-0.0261689	insig
mws0425	C5H6O4	Citraconic acid	Organic acids	Organic acids	498-23-7	B	26445	40159	35383	34094	49671	41095	0.774913	1.22427	0.291926	insig
Zmpn000638	C4H9N3O2	3-Guanidinopropionic acid	Organic acids	Organic acids	353-09-3	B	41840	35150	29790	28412	24704	21310	1.18239	0.697003	-0.520763	insig
pmp001198	C6H13NO2	6-Deoxyfagomine	Alkaloids	Alkaloids	197449-09-5	A	6301900	5795300	5898700	8681500	7026400	5326300	0.673766	1.16883	0.225069	insig
pme0274	C6H13NO2	6-Aminocaproic acid	Organic acids	Organic acids	60-32-2	B	680360	535340	514030	634340	553880	541060	0.0448437	0.99974	-0.000375375	insig
mws0227	C6H13NO2	L-Leucine*	Amino acids and derivatives	Amino acids and derivatives	61-90-5	A	1272600	1279000	1203100	1817100	1457300	1165600	0.788397	1.18252	0.241862	insig
mws0258	C6H13NO2	L-Isoleucine*	Amino acids and derivatives	Amino acids and derivatives	73-32-5	A	1288900	1208000	1199100	1744400	1487500	1131600	0.783773	1.1806	0.239521	insig
pme3034	C5H8O4	Ethylmalonic acid	Organic acids	Organic acids	601-75-2	B	32451	22933	30183	9777.9	15079	9252.6	1.37639	0.398629	-1.32688	down
pme0243	C5H8O4	Glutaric acid	Organic acids	Organic acids	110-94-1	B	788680	520480	657540	296590	433440	199740	1.23791	0.472756	-1.08083	down
Lmmn000806	C5H8O4	Dimethylmalonic acid*	Organic acids	Organic acids	595-46-0	A	247070	153190	303940	95192	141900	49203	1.16041	0.406554	-1.29848	down
Lmbn001364	C5H8O4	4-Hydroxy-2-Oxopentanoic Acid*	Organic acids	Organic acids	3318-73-8	B	235720	162150	296620	76675	141610	50675	1.21693	0.387277	-1.36856	down
Lmbn001288	C5H8O4	2-Hydroxy-2-methyl-3-oxobutanoic acid*	Organic acids	Organic acids	71698-08-3	B	245470	164060	290430	84465	138900	45463	1.19986	0.384062	-1.38059	down
mws0473	C5H8O4	2-Methylsuccinic acid*	Organic acids	Organic acids	498-21-5	A	2716800	1822800	3148700	1051200	1691400	564740	1.1585	0.430178	-1.21699	down
Lmgn000160	C4H8N2O3	3-Ureidopropionic Acid	Organic acids	Organic acids	462-88-4	B	21380	16510	13039	19955	12708	12065	0.415236	0.878242	-0.187309	insig
Lmrn002746	C6H12O3	2-Hydroxy-4-methylpentanoic acid	Organic acids	Organic acids	498-36-2	A	89688	117230	135640	2745.9	44047	33129	1.12302	0.233309	-2.09969	down
mws0341	C6H12O3	2-Hydroxyisocaproic acid	Organic acids	Organic acids	20312-37-2	A	90397	29337	55432	23207	18524	16644	1.22766	0.333255	-1.5853	down
mws0972	C6H12O3	6-Hydroxyhexanoic acid	Organic acids	Organic acids	1191-25-9	A	258380	258080	309670	581400	863240	684130	1.40956	2.5768	1.36558	up
pme2527	C5H12N2O2	L-Ornithine	Amino acids and derivatives	Amino acids and derivatives	70-26-8	B	39404	43599	46753	35326	52627	31678	0.448812	0.921969	-0.11721	insig
mws0219	C4H7NO4	L-Aspartic Acid	Amino acids and derivatives	Amino acids and derivatives	56-84-8	A	19381000	17446000	15488000	14055000	15513000	11025000	1.0701	0.775934	-0.365994	insig
mws0275	C4H6O5	L-Malic acid*	Organic acids	Organic acids	97-67-6	A	42176000	41204000	23845000	37641000	30608000	24952000	0.362848	0.86921	-0.202224	insig
Lmbn000198	C4H6O5	3-Dehydro-L-Threonic Acid*	Organic acids	Organic acids	-	A	15805000	12218000	9319800	11661000	9213400	7908500	0.791635	0.770775	-0.375618	insig
pmb0374	C5H5N5	2-Aminopurine	Nucleotides and derivatives	Nucleotides and derivatives	452-06-2	A	50306	29486	75818	69177	64912	45513	0.45991	1.15418	0.206869	insig
pme0040	C5H5N5	Adenine	Nucleotides and derivatives	Nucleotides and derivatives	73-24-5	A	70529000	27141000	49927000	23427000	14521000	12021000	1.22932	0.33855	-1.56256	down
HJKP000649	C8H9NO	N-benzylformamide	Alkaloids	Alkaloids	6343-54-0	B	1944100	1627700	1652400	2106000	1579600	1107500	0.383894	0.91748	-0.124251	insig
mws0889	C4H8O5	D-Threonic Acid	Others	Saccharides and Alcohols	3909-12-4	A	2146000	2287500	1865000	2366500	1096400	704680	0.837094	0.661678	-0.595798	insig
pme0033	C5H4N4O	Hypoxanthine	Nucleotides and derivatives	Nucleotides and derivatives	68-94-0	B	97997	124040	73575	14713	35563	46825	1.26655	0.328474	-1.60615	down
Zmyn002919	C8H8O2	2-Methylbenzoic acid	Phenolic acids	Phenolic acids	118-90-1	B	9002.9	11604	14551	3087.9	422.1	1737	1.2681	0.149241	-2.74428	down
mws1336	C7H7NO2	4-Aminobenzoic acid	Phenolic acids	Phenolic acids	150-13-0	B	859110	1111900	930730	1276700	1425500	1351600	1.32878	1.39702	0.482357	insig
mws1078	C7H7NO2	Anthranilic Acid	Phenolic acids	Phenolic acids	118-92-3	B	656190	514570	554190	290120	281880	217480	1.40733	0.457683	-1.12758	down
pme2268	C7H7NO2	Trigonelline	Alkaloids	Alkaloids	535-83-1	A	16948000	21962000	22828000	19080000	19349000	19069000	0.446712	0.931323	-0.102647	insig
mws0146	C7H7NO2	Nicotinic Acid Methyl Ester(Methyl Nicotinate)	Alkaloids	Alkaloids	93-60-7	B	28030	50608	30533	88681	88258	50946	1.23075	2.08741	1.06172	up
pme1002	C8H11NO	L-Tyramine	Amino acids and derivatives	Amino acids and derivatives	51-67-2	A	2379100	1896700	1883500	2349500	2465900	1311600	0.103541	0.994756	-0.00758555	insig
pma0948	C8H11NO	Phenylethanolamine	Alkaloids	Alkaloids	7568-93-6	B	1084500	787450	800560	978610	1019600	524410	0.250705	0.943914	-0.0832724	insig
Hmgn001653	C7H6O3	Protocatechualdehyde*	Phenolic acids	Phenolic acids	139-85-5	B	3247000	1120500	2022100	1557100	771500	568100	0.987452	0.453346	-1.14132	insig
Lmgn001670	C7H6O3	Salicylic acid	Phenolic acids	Phenolic acids	69-72-7	A	57584	46144	52063	39741	34283	61625	0.629039	0.870711	-0.199733	insig
mws0749	C7H6O3	4-Hydroxybenzoic acid	Phenolic acids	Phenolic acids	99-96-7	B	3418100	1110600	2006900	1577700	872090	530140	0.951191	0.455954	-1.13304	insig
Lmbn002862	C7H6O3	3-Hydroxybenzoic Acid	Organic acids	Organic acids	99-06-9	B	6497700	1475700	2972100	6381300	1856500	1588200	0.147032	0.897721	-0.155662	insig
Lmbn001981	C7H6O3	2,5-Dihydroxybenzaldehyde*	Phenolic acids	Phenolic acids	1194-98-5	B	3295400	1107200	2042400	1387400	779320	598110	1.04149	0.428988	-1.22099	down
pme1137	C6H5NO3	6-Hydroxynicotinic acid	Alkaloids	Alkaloids	5006-66-6	B	20753	25761	38807	132180	83059	42942	1.22296	3.026	1.59741	up
pme2828	C6H5NO3	4-Nitrophenol	Phenolic acids	Phenolic acids	100-02-7	B	19897000	18304000	18602000	17396000	15334000	17688000	1.11866	0.887594	-0.172028	insig
mws0704	C2H8NO4P	O-Phosphorylethanolamine	Alkaloids	Alkaloids	1071-23-4	B	73279	75569	81379	29768	48349	33072	1.37566	0.482954	-1.05004	down
pma2987	C6H11N3O	Histidinol	Alkaloids	Alkaloids	501-28-0	B	7085800	6604000	5758400	6047000	6062900	6326800	0.560354	0.94799	-0.0770562	insig
pme3207	C6H6O4	Muconic acid	Organic acids	Organic acids	1119-72-8	A	2046000	2087700	1930400	2254500	2351000	2631400	1.24878	1.1934	0.255078	insig
pmb0764	C6H9NOS	4-Methyl-5-thiazoleethanol	Others	Others	137-00-8	B	1943.3	3420.2	4375.2	5622	10578	4681.1	1.09194	2.14414	1.1004	up
Rfmb320	C7H13NO2	1-Methylpiperidine-2-carboxylic acid	Amino acids and derivatives	Amino acids and derivatives	7730-87-2	B	178970	212830	226490	301710	300990	304570	1.38982	1.46739	0.553248	insig
mws0103	C9H7NO	Indole-3-carboxaldehyde	Alkaloids	Plumerane	487-89-8	B	69403	65426	72066	57124	72457	81552	0.0120676	1.02048	0.0292533	insig
pme0295	C6H11NO3	4-Acetamidobutyric acid	Organic acids	Organic acids	3025-96-5	B	41955	39173	48820	57198	17634	24993	0.66321	0.768192	-0.380461	insig
mws0567	C5H11N3O2	4-Guanidinobutyric acid	Organic acids	Organic acids	463-00-3	B	233210	174560	281220	166230	138040	141950	1.19571	0.647644	-0.626728	insig
pme2380	C5H6O5	α-Ketoglutaric acid	Organic acids	Organic acids	328-50-7	B	217060	148870	224160	182130	173710	176130	0.482965	0.901507	-0.14959	insig
mws0208	C6H10O4	Adipic Acid*	Organic acids	Organic acids	124-04-9	B	992240	664080	647270	340330	483310	293610	1.29431	0.485004	-1.04393	down
Wmzn000227	C6H10O4	2,2-Dimethylsuccinic acid	Organic acids	Organic acids	597-43-3	A	30069	17149	22461	81279	65450	52155	1.37434	2.85429	1.51313	up
Lmbn001609	C6H10O4	2-Acetyl-2-Hydroxybutanoic Acid	Organic acids	Organic acids	-	B	135990	95359	85646	42348	65098	37757	1.29897	0.458061	-1.12639	down
mws0924	C6H10O4	2-Methylglutaric acid*	Organic acids	Organic acids	617-62-9	B	875860	589220	502670	281600	379960	260200	1.30384	0.468433	-1.09408	down
Lmbn001676	C6H10O4	3-Hydroxy-3-Methyl-2-Oxopentanoic Acid	Organic acids	Organic acids	-	B	18676	14618	26550	5338.1	12289	2270.8	1.14658	0.332496	-1.58859	down
pme0193	C5H10N2O3	L-Glutamine	Amino acids and derivatives	Amino acids and derivatives	56-85-9	A	4956400	3063200	3894100	2365900	2442200	1834700	1.27812	0.557577	-0.842758	insig
pme0026	C6H14N2O2	L-Lysine	Amino acids and derivatives	Amino acids and derivatives	56-87-1	B	5291600	3239400	4069400	2346600	2621900	1962400	1.2903	0.550054	-0.862355	insig
pme1691	C7H16NO2	Acetylcholine	Alkaloids	Alkaloids	60-31-1	B	101400	79401	82150	53083	62000	49475	1.35859	0.625812	-0.676198	insig
mws1050	C5H9NO4	O-Acetylserine	Amino acids and derivatives	Amino acids and derivatives	5147-00-2	B	1014500	1134000	1430100	574350	990890	667910	1.17235	0.624029	-0.680315	insig
pme0014	C5H9NO4	L-Glutamic acid	Amino acids and derivatives	Amino acids and derivatives	56-86-0	A	71886000	78598000	68649000	69942000	70100000	66646000	0.786489	0.943208	-0.0843521	insig
pmp001285	C8H4O3	Phthalic anhydride	Phenolic acids	Phenolic acids	85-44-9	A	772880	850150	678380	739960	884270	654570	0.0760561	0.990176	-0.0142437	insig
pmb2826	C5H8O5	L-Citramalic acid	Organic acids	Organic acids	6236-09-5	A	649790	521670	407060	573450	483400	341040	0.40757	0.88557	-0.175322	insig
Lmbn000216	C5H8O5	3-Methylmalic acid	Organic acids	Organic acids	152204-30-3	A	42849	23045	31280	20620	9783.4	28502	0.909482	0.606185	-0.72217	insig
ML10171848	C5H8O5	D-Arabinono-1,4-lactone	Others	Saccharides and Alcohols	2782-09-4	A	122990	103500	94484	101440	73434	47822	0.939459	0.693813	-0.527381	insig
mws2213	C9H8O2	Cinnamic acid	Phenolic acids	Phenolic acids	140-10-3	A	6443	3642.1	7247	15771	34584	32192	1.3325	4.76267	2.25177	up
pme3154	C6H12O4	Mevalonic acid	Organic acids	Organic acids	150-97-0	B	163780	144700	306880	386770	964220	1011800	1.24198	3.83969	1.94099	up
Lmgp000796	C8H7NO2	4-Hydroxymandelonitrile	Alkaloids	Alkaloids	13093-65-7	A	5338600	6206800	7339700	6298400	7621000	5490200	0.160547	1.02777	0.039522	insig
pme1210	C5H11NO2S	L-Methionine	Amino acids and derivatives	Amino acids and derivatives	63-68-3	A	6007700	6435800	7290400	6352200	7497000	5487600	0.161423	0.979877	-0.029327	insig
mws0847	C6H7N5	1-Methyladenine	Nucleotides and derivatives	Nucleotides and derivatives	5142-22-3	B	99718	84935	130000	95635	119210	95052	0.0474986	0.984885	-0.0219729	insig
mws0262	C4H6O6	L-Tartaric acid	Organic acids	Organic acids	87-69-4	B	1172600	1101400	1068900	882680	781310	725920	1.3645	0.714921	-0.484144	insig
Zmgn000173	C5H10O5	D-Ribose	Others	Saccharides and Alcohols	50-69-1	B	149110	116790	151270	170180	143130	127110	0.342655	1.05573	0.0782446	insig
mws1499	C5H10O5	D-Arabinose	Others	Saccharides and Alcohols	10323-20-3	B	405970	368400	316720	431840	338760	221100	0.388461	0.908908	-0.137794	insig
Lmxp001668	C9H10O2	2-Methoxy-4-ethenylphenol	Phenolic acids	Phenolic acids	7786-61-0	A	1589600	1772200	1402700	529010	617560	458980	1.43995	0.336982	-1.56926	down
pme0183	C5H5N5O	Isoguanine	Nucleotides and derivatives	Nucleotides and derivatives	3373-53-3	B	396720	181380	248460	157090	204540	132120	1.01442	0.597355	-0.743339	insig
pme1109	C5H5N5O	Guanine	Nucleotides and derivatives	Nucleotides and derivatives	73-40-5	A	1895200	475940	1031000	287520	258440	244550	1.26718	0.232357	-2.10559	down
pme0256	C5H4N4O2	Xanthine	Nucleotides and derivatives	Nucleotides and derivatives	69-89-6	A	31493	28071	27932	23747	26438	27674	1.06997	0.889858	-0.168353	insig
mws0182	C8H8O3	p-Hydroxyphenyl acetic acid	Phenolic acids	Phenolic acids	156-38-7	B	9044.3	4432.1	3722.5	9	4757.6	3568.3	0.764592	0.484618	-1.04508	insig
pme2362	C8H8O3	Mandelic acid	Phenolic acids	Phenolic acids	90-64-2	B	72062	95616	68364	100870	100070	108520	1.18083	1.31104	0.390709	insig
mws0458	C8H8O3	Vanillin	Phenolic acids	Phenolic acids	121-33-5	B	316460	239060	288770	139460	190800	273390	1.00948	0.714979	-0.484026	insig
pme0513	C5H12O5	Xylitol	Others	Saccharides and Alcohols	87-99-0	A	9156.3	13216	17559	23463	18666	18941	1.12072	1.52938	0.612944	insig
mws0437	C5H12O5	D-Arabitol	Others	Saccharides and Alcohols	488-82-4	A	59041	43299	55198	68778	59127	51070	0.67555	1.13608	0.184058	insig
mws0444	C7H7NO3	3-Aminosalicylic acid	Phenolic acids	Phenolic acids	570-23-0	B	21198	12398	5367.8	9529.9	8634.2	10639	0.294885	0.739227	-0.43591	insig
mws0596	C7H7NO3	3-Hydroxyanthranilic acid	Organic acids	Organic acids	548-93-6	B	9	23579	11675	20844	31777	29716	0.772516	2.33494	1.22339	insig
mws0183	C7H6O4	3,4-Dihydroxybenzoic acid (Protocatechuic acid)*	Phenolic acids	Phenolic acids	99-50-3	A	87331	109190	96513	41818	61613	65303	1.31076	0.575817	-0.796317	insig
mws0885	C7H6O4	2,4-Dihydroxybenzoic acid	Phenolic acids	Phenolic acids	89-86-1	A	1047500	242980	477720	343870	191620	176130	0.942355	0.402454	-1.3131	insig
mws0180	C7H6O4	2,5-Dihydroxybenzoic acid; Gentisic Acid*	Phenolic acids	Phenolic acids	490-79-9	A	56864	88284	35424	26881	30285	33434	1.10949	0.501739	-0.994991	insig
mws0639	C7H6O4	2,3-Dihydroxybenzoic Acid*	Organic acids	Organic acids	303-38-8	A	1696000	474680	804030	538690	440230	364740	0.975579	0.451694	-1.14658	insig
mws0254	C6H9N3O2	L-Histidine	Amino acids and derivatives	Amino acids and derivatives	71-00-1	B	1308700	728480	908570	635600	767960	423330	1.03123	0.620178	-0.689245	insig
pmb0819	C10H8N2	3-Indoleacetonitrile	Alkaloids	Plumerane	771-51-7	B	13054	13461	18425	25665	31460	15977	1.05817	1.62666	0.701911	insig
Lmbn001467	C7H13NO3	5-Acetamidopentanoic Acid	Organic acids	Organic acids	1072-10-2	B	72375	51586	57751	78977	63749	54362	0.40298	1.08462	0.117186	insig
mws0987	C10H8O2	6-MethylCoumarin	Lignans and Coumarins	Coumarins	92-48-8	B	8647.1	11598	4720.4	4428.7	8670.2	8320.9	0.30024	0.857976	-0.220991	insig
Zmjn001813	C7H12O4	Pimelic acid*	Organic acids	Organic acids	111-16-0	B	17555	17102	13911	132640	48714	49176	1.35395	4.74654	2.24688	up
Lmbn002072	C7H12O4	2-Propylsuccinic acid*	Organic acids	Organic acids	618-57-5	B	27505	22734	22386	114900	25966	35829	0.914636	2.43298	1.28272	insig
pme0128	C6H12N2O3	L-Alanyl-L-Alanine	Amino acids and derivatives	Amino acids and derivatives	1948-31-8	B	19218	16275	15035	19296	11590	7613.2	0.725067	0.761938	-0.392255	insig
mws0005	C10H12N2	Tryptamine	Alkaloids	Plumerane	61-54-1	A	25655000	12550000	14506000	1286800	1859100	2323700	1.44226	0.103766	-3.2686	down
mws1417	C9H7NO2	Indole-3-carboxylic acid	Alkaloids	Plumerane	771-50-6	B	37346	28079	29810	21322	30429	27112	0.892297	0.828088	-0.272143	insig
pme3382	C6H11NO4	N-Acetyl-L-threonine	Amino acids and derivatives	Amino acids and derivatives	17093-74-2	A	123180	97989	119990	118320	87735	72833	0.801048	0.817472	-0.290758	insig
mws1346	C6H11NO4	DL-2-Aminoadipic acid	Alkaloids	Alkaloids	542-32-5	B	156820	129590	188810	141440	147510	90846	0.762245	0.7992	-0.323371	insig
pme2761	C5H6O6	4-Hydroxy-2-oxoglutaric acid	Organic acids	Organic acids	1187-99-1	B	41415	65400	58071	63209	42855	26097	0.561231	0.80153	-0.319172	insig
pme2914	C6H10O5	3-Hydroxy-3-methylpentane-1,5-dioic acid	Amino acids and derivatives	Amino acids and derivatives	503-49-1	A	439170	259750	280690	116910	182480	92052	1.2942	0.39959	-1.32341	down
pmf0440	C10H10O2	4-MethoxycinnaMaldehyde	Phenolic acids	Phenolic acids	1963-36-6	B	199300	214620	165340	206210	178040	179420	0.15244	0.973086	-0.0393603	insig
pme2758	C5H9NO5	4-Hydroxy-L-glutamic acid	Amino acids and derivatives	Amino acids and derivatives	3913-68-6	A	103430	51270	58059	27379	24163	11600	1.27735	0.296777	-1.75255	down
Lmbp000123	C6H13NO2S	L-Homomethionine	Amino acids and derivatives	Amino acids and derivatives	25148-30-5	B	681820	312540	621920	39607	29813	18575	1.43285	0.0544429	-4.19911	down
pme1419	C6H13NO2S	L-Methionine methyl ester	Amino acids and derivatives	Amino acids and derivatives	10332-17-9	A	153400	184120	150230	127300	119150	95134	1.231	0.700326	-0.513901	insig
mws1641	C6H4N4O2	Lumazine	Nucleotides and derivatives	Nucleotides and derivatives	487-21-8	B	17590	10339	8942.4	8798.3	9083.6	10939	0.664209	0.78166	-0.355387	insig
pme1439	C9H8O3	p-Coumaric acid	Phenolic acids	Phenolic acids	501-98-4	A	1500300	2813200	2972900	846230	1534100	2173100	0.872118	0.624922	-0.678252	insig
pmb0142	C9H8O3	Caffeic aldehyde	Phenolic acids	Phenolic acids	141632-15-7	B	116420	99040	122120	101640	119270	165090	0.466924	1.14343	0.193371	insig
mws0159	C9H8O3	Phenylpyruvic acid	Organic acids	Organic acids	156-06-9	B	105810	219220	139610	81805	101420	122340	0.91764	0.657638	-0.604634	insig
pme2529	C6H12O5	1,5-Anhydro-D-glucitol	Others	Saccharides and Alcohols	154-58-5	B	115810	113140	100050	59476	58722	49760	1.43221	0.510511	-0.969987	insig
pme3083	C8H7NO3	2-(Formylamino)benzoic acid	Phenolic acids	Phenolic acids	3342-77-6	B	433540	135830	268620	116970	100070	108300	1.161	0.388239	-1.36498	down
pme0021	C9H11NO2	L-Phenylalanine	Amino acids and derivatives	Amino acids and derivatives	63-91-2	A	11777000	11983000	12830000	31614000	22309000	12686000	1.07393	1.82042	0.864268	insig
pmb0037	C10H15NO	Hordenine	Alkaloids	Alkaloids	539-15-1	B	486980	596890	554790	197280	345100	302320	1.32254	0.515482	-0.956006	insig
pme0281	C8H6O4	Terephthalic acid	Phenolic acids	Phenolic acids	100-21-0	A	1052000	948110	1170800	360420	464450	328600	1.43557	0.363766	-1.45892	down
pme0282	C8H6O4	Phthalic acid	Organic acids	Organic acids	88-99-3	A	157080	100670	171540	68547	98641	65126	1.22465	0.541159	-0.885876	insig
pmc0274	C6H6N4S	6-Methylmercaptopurine	Nucleotides and derivatives	Nucleotides and derivatives	50-66-8	B	12305000	12559000	13920000	33343000	24445000	13575000	1.08738	1.84001	0.879715	insig
mws0344	C5H10O6	D-Xylonic acid	Organic acids	Organic acids	526-91-0	A	2775500	2214100	2427100	2331800	1545400	997410	0.974131	0.657248	-0.605491	insig
pme3381	C9H10O3	3-Hydroxyphenylacetic Acid Methyl Ester	Phenolic acids	Phenolic acids	42058-59-3	B	10563	15952	19285	4658.3	11547	6050	1.13631	0.485924	-1.0412	down
mws0467	C9H10O3	3-(4-Hydroxyphenyl)-propionic acid	Phenolic acids	Phenolic acids	501-97-3	B	35342	75529	76627	25552	58560	76191	0.362646	0.854958	-0.226074	insig
pmn001681	C10H14O2	1-(4-Methoxyphenyl)-1-propanol	Phenolic acids	Phenolic acids	5349-60-0	B	12344	9852.7	6612.4	10447	16134	8923	0.551189	1.23239	0.301457	insig
NK10253223	C8H9NO3	2-Amino-3-methoxybenzoic acid	Phenolic acids	Phenolic acids	3177-80-8	B	134110	123300	113110	103630	140170	104550	0.461672	0.940165	-0.0890139	insig
Zmjp000624	C8H9NO3	Pyridoxal	Others	Vitamin	66-72-8	A	129330	113870	102140	95589	134070	130630	0.150819	1.04329	0.0611372	insig
Hmtp000776	C8H9NO3	4,5,6-Trihydroxy-2-cyclohexen-1-ylideneacetonitrile	Alkaloids	Alkaloids	-	B	195140	196600	239480	640430	434830	239430	1.13167	2.08278	1.05851	up
mws2125	C3H5O6P	Phosphoenolpyruvate	Organic acids	Organic acids	138-08-9	B	290480	296020	424140	74319	116090	162390	1.35049	0.349085	-1.51835	down
mws0028	C8H8O4	Vanillic acid	Phenolic acids	Phenolic acids	121-34-6	B	430370	161550	261630	116410	44048	40604	1.25548	0.23556	-2.08584	down
Hmbp001276	C8H8O4	Gallacetophenone	Phenolic acids	Phenolic acids	528-21-2	B	202770	258090	258760	7474.6	22208	17536	1.441	0.065616	-3.92981	down
pme1292	C8H8O4	Homogentisic acid	Phenolic acids	Phenolic acids	451-13-8	B	53948	60262	64736	39888	45512	40197	1.3735	0.701871	-0.510722	insig
pme2598	C8H8O4	3,4-Dihydroxybenzeneacetic acid	Phenolic acids	Phenolic acids	102-32-9	B	157300	34407	67755	55582	12247	11202	0.997054	0.304596	-1.71503	insig
pme1383	C8H11NO3	Pyridoxine	Others	Vitamin	65-23-6	A	735480	897030	721430	256620	881100	851220	0.55221	0.844941	-0.243078	insig
pme0181	C7H11N3O2	3-Methyl-L-Histidine	Amino acids and derivatives	Amino acids and derivatives	368-16-1	B	40338	33274	26552	29680	36151	29494	0.226506	0.951689	-0.0714376	insig
Zmzn000078	C3H7O6P	Dihydroxyacetone phosphate	Others	Saccharides and Alcohols	57-04-5	B	184560	40135	230810	109810	166680	78227	0.0950351	0.778733	-0.360798	insig
pme3186	C3H7O6P	DL-Glyceraldehyde-3-phosphate	Organic acids	Organic acids	591-59-3	B	77040	18597	65895	43789	94602	67801	0.457934	1.27648	0.352168	insig
mws0024	C7H6O5	Gallic acid	Tannins	Tannin	149-91-7	B	127820	59149	82327	65997	39656	46997	1.04291	0.566848	-0.818965	insig
Lmbn003524	C9H16O3	9-Oxononanoic acid	Organic acids	Organic acids	2553-17-5	B	9359.9	10006	11415	9649	8856.2	9466.5	0.851694	0.908736	-0.138067	insig
pme0253	C8H15NO3	N-Acetyl-L-leucine	Amino acids and derivatives	Amino acids and derivatives	1188-21-2	A	84220	72324	70935	93947	88006	68544	0.58301	1.10119	0.13906	insig
MA10039492	C6H6O6	Dehydroascorbic acid	Others	Vitamin	490-83-5	A	1257100	922360	1451100	1105500	1020600	647410	0.787605	0.763934	-0.388479	insig
pme3009	C6H6O6	Trans-Citridic acid	Organic acids	Organic acids	4023-65-8	B	348740	649620	525370	459220	535610	381630	0.244133	0.903349	-0.146645	insig
Lmgn002555	C8H14O4	2-Propylglutaric acid	Organic acids	Organic acids	32806-62-5	A	374690	368580	487050	25129	272980	143680	1.06556	0.359085	-1.4776	down
mws0242	C8H14O4	Suberic Acid	Organic acids	Organic acids	505-48-6	B	157060	89181	84685	43590	49129	36312	1.33509	0.389909	-1.35879	down
Zmyn000155	C7H14N2O3	N-α-Acetyl-L-ornithine	Amino acids and derivatives	Amino acids and derivatives	6205-08-9	B	112980	61730	68225	48610	48989	29048	1.15104	0.521321	-0.939757	insig
mws0260	C6H14N4O2	L-Arginine	Amino acids and derivatives	Amino acids and derivatives	74-79-3	A	284440	109710	192190	86288	202630	101990	0.726906	0.666692	-0.584908	insig
pme2559	C6H9NO5	N-Acetyl-L-Aspartic Acid	Amino acids and derivatives	Amino acids and derivatives	997-55-7	A	49759	33743	39601	29785	18140	11627	1.15657	0.483758	-1.04764	down
pme1651	C10H9NO2	Indole 3-acetic acid (IAA)	Alkaloids	Plumerane	87-51-4	B	33930	35386	33848	20544	17709	13801	1.37903	0.504575	-0.986859	insig
mws4175	C6H8O6	D-Glucurono-6,3-lactone	Others	Saccharides and Alcohols	32449-92-6	B	2388900	2979700	2203800	3075800	2590400	2493600	0.541058	1.07757	0.107783	insig
Hmfn000531	C6H8O6	L-Ascorbic acid (Vitamin C)	Others	Vitamin	50-81-7	A	4542400	5639900	5134400	4510100	3677200	2627200	1.0444	0.706059	-0.502139	insig
pmb3101	C7H12O5	2-Isopropylmalic Acid	Organic acids	Organic acids	49601-06-1	A	880870	933820	945660	1306800	960850	786580	0.433915	1.10646	0.145958	insig
Zmgn001448	C7H12O5	2-Propylmalic Acid*	Organic acids	Organic acids	-	A	942500	1280300	1056700	1492300	1100900	874200	0.223531	1.0573	0.0803784	insig
Lmbn001754	C7H12O5	3-Isopropylmalic Acid*	Organic acids	Organic acids	921-28-8	A	990400	1044600	960290	1431000	1027400	891890	0.510104	1.11852	0.16159	insig
pmb0774	C10H12N2O	N-Hydroxytryptamine*	Alkaloids	Phenolamine	-	A	6059900	5106600	3820900	787860	716050	1589800	1.3998	0.206421	-2.27634	down
pme2024	C10H12N2O	Serotonin*	Alkaloids	Plumerane	50-67-9	A	7601800	6772800	5234000	1030200	1060500	2053200	1.41549	0.211331	-2.24243	down
pmb0468	C6H11NO3S	N-Formyl-L-Methionine	Amino acids and derivatives	Amino acids and derivatives	4289-98-9	B	208770	159780	114540	24420	22186	59326	1.35656	0.21928	-2.18915	down
mws1013	C9H6O4	Esculetin	Lignans and Coumarins	Coumarins	305-01-1	A	29866	72802	79531	48774	8958.7	9	0.783752	0.316916	-1.65783	insig
pme1021	C6H10O6	D-Glucono-1,5-lactone	Others	Saccharides and Alcohols	90-80-2	B	14148	13229	18353	20530	14304	20639	0.765765	1.21305	0.278645	insig
mws0009	C10H10O3	Coniferaldehyde	Phenolic acids	Phenolic acids	20649-42-7	B	52775	66320	72851	99813	187610	145930	1.28974	2.25768	1.17484	up
pmb2795	C10H10O3	4-Methoxycinnamic acid*	Phenolic acids	Phenolic acids	830-09-1	A	263710	379090	272000	240840	138310	99356	1.1072	0.523072	-0.934919	insig
mws1195	C10H10O3	p-Coumaric acid methyl ester*	Phenolic acids	Phenolic acids	3943-97-3	A	375080	563560	408650	320580	176280	117800	1.14687	0.45622	-1.1322	down
pmb0786	C6H13NO5	D-Glucosamine	Others	Saccharides and Alcohols	3416-24-8	B	96090	87465	92817	92873	43459	79017	0.774314	0.7792	-0.359935	insig
mws2212	C9H8O4	Caffeic acid	Phenolic acids	Phenolic acids	331-39-5	A	3181200	861590	2263400	1260200	622350	463370	1.01465	0.372003	-1.42661	down
pme0516	C6H12O6	Inositol	Others	Saccharides and Alcohols	87-89-8	B	129500	94197	92131	152280	155140	95749	0.77584	1.27655	0.352246	insig
mws1164	C6H12O6	D-Fructose*	Others	Saccharides and Alcohols	7660-25-5	A	1412400	1112800	1065500	1701000	1186500	864690	0.0863169	1.04497	0.0634678	insig
mws4170	C6H12O6	D-Glucose*	Others	Saccharides and Alcohols	14431-43-7	A	1360400	933340	857770	1867800	935860	939070	0.394871	1.1876	0.248048	insig
mws0250	C9H11NO3	L-Tyrosine	Amino acids and derivatives	Amino acids and derivatives	60-18-4	A	1688700	1583100	1580600	1858400	1337300	924160	0.615525	0.849036	-0.236103	insig
Lmrn001951	C9H10O4	(S)-2-Hydroxy-3-(4-Hydroxyphenyl)Propanoic Acid	Phenolic acids	Phenolic acids	23508-35-2	B	4035.3	9465	3714.5	9	9	9	1.46313	0.00156842	-9.31647	down
mws1350	C9H10O4	Syringaldehyde; 4-Hydroxy-3,5-Dimethoxybenzaldehyde	Phenolic acids	Phenolic acids	134-96-3	B	9	2407.3	9	9	9	5526.1	0.0626736	2.28594	1.19279	insig
mws0214	C6H14O6	D-Sorbitol	Others	Saccharides and Alcohols	50-70-4	B	17424	8255.8	10963	14724	13641	7515.9	0.0282835	0.979207	-0.0303137	insig
pme2237	C6H14O6	Dulcitol	Others	Saccharides and Alcohols	608-66-2	B	16927	7244.7	6912.1	8973.3	11774	12801	0.318045	1.07929	0.110077	insig
pme2596	C8H9NO4	4-Pyridoxic acid	Others	Vitamin	82-82-6	A	289040	337120	335980	212160	282480	258200	1.17292	0.782464	-0.353904	insig
pme2602	C3H8NO6P	O-Phospho-L-serine	Amino acids and derivatives	Amino acids and derivatives	407-41-0	B	32386	8077.8	29164	20568	20183	17631	0.0469176	0.838487	-0.25414	insig
Zmgn000447	C3H7O7P	3-Phospho-D-glyceric acid	Others	Saccharides and Alcohols	820-11-1	B	1097100	881400	1041000	391760	518150	617290	1.37858	0.505779	-0.983421	insig
mws0752	C11H22O2	Undecylic Acid	Lipids	Free fatty acids	112-37-8	A	608470	432320	437690	421890	453470	469650	0.530095	0.909725	-0.136498	insig
mws0237	C9H16O4	Azelaic acid	Organic acids	Organic acids	123-99-9	A	1112300	940290	894530	1056400	861630	956470	0.186358	0.975359	-0.0359948	insig
pme0122	C8H16N2O3	N6-Acetyl-L-lysine	Amino acids and derivatives	Amino acids and derivatives	692-04-6	A	69843	49478	64977	57747	80883	43617	0.123049	0.988871	-0.0161453	insig
mws0736	C8H16N2O3	N-Glycyl-L-leucine*	Amino acids and derivatives	Amino acids and derivatives	869-19-2	B	1743800	386190	654140	363910	303910	332100	1.02111	0.35915	-1.47734	down
mws5041	C8H16N2O3	L-Glycyl-L-isoleucine*	Amino acids and derivatives	Amino acids and derivatives	19461-38-2	B	1445500	310470	516380	294090	251840	267650	1.00403	0.358035	-1.48183	down
Zmjp000182	C7H16N4O2	N-Monomethyl-L-arginine	Amino acids and derivatives	Amino acids and derivatives	17035-90-4	B	98643	81061	114740	53128	50765	29681	1.29319	0.453648	-1.14035	down
pme3388	C7H16N4O2	Homoarginine	Amino acids and derivatives	Amino acids and derivatives	156-86-5	B	14351	1900.2	13222	9005.2	77169	73484	0.910336	5.41706	2.43751	insig
Zmtn001624	C10H7NO3	N-Acetylisatin	Alkaloids	Plumerane	574-17-4	A	715670	577770	586490	174350	151290	93713	1.4158	0.223068	-2.16444	down
pme0075	C7H11NO5	N-Acetyl-L-glutamic acid	Amino acids and derivatives	Amino acids and derivatives	1188-37-0	A	1224300	1440800	1432000	1430100	1081200	1265600	0.549486	0.921847	-0.117401	insig
pme0278	C7H14N2O4	2,6-Diaminooimelic acid	Amino acids and derivatives	Amino acids and derivatives	583-93-7	B	25094	24816	15402	5503.8	7228.4	3073.9	1.35389	0.242009	-2.04687	down
pmb2561	C7H13NO3S	N-Acetyl-L-methionine	Amino acids and derivatives	Amino acids and derivatives	65-82-7	B	10955	12849	13432	19697	9750.5	10391	0.113297	1.06989	0.0974652	insig
Zmyn000453	C6H8O7	Isocitric Acid	Organic acids	Organic acids	320-77-4	A	7954700	6292000	6657500	6662600	7449100	6628900	0.0713005	0.992174	-0.0113352	insig
mws0281	C6H8O7	Citric Acid	Organic acids	Organic acids	77-92-9	A	6547900	4511600	4662000	5663900	5703300	4299100	0.0146824	0.996489	-0.00507438	insig
Hmjp002337	C10H8O4	Isoscopoletin (6-Hydroxy-7-Methoxycoumarin)	Lignans and Coumarins	Coumarins	776-86-3	B	342300	303410	340680	135720	119720	52650	1.3095	0.312341	-1.67881	down
Cmpp003619	C10H8O4	6,7-Dihydroxy-4-methylcoumarin	Lignans and Coumarins	Coumarins	529-84-0	B	385600	182510	209220	168520	187470	69897	0.922446	0.547884	-0.868057	insig
pme2993	C10H8O4	Scopoletin (7-Hydroxy-5-methoxycoumarin)	Lignans and Coumarins	Coumarins	92-61-5	B	322630	140950	186480	158720	109220	55806	0.985749	0.498025	-1.00571	insig
mws0277	C7H12O6	Quinic Acid	Organic acids	Organic acids	77-95-2	A	2198300	2171500	2310700	2090300	2365300	1952700	0.517584	0.959255	-0.0600144	insig
mws1189	C6H10O7	D-Galacturonic acid*	Organic acids	Organic acids	685-73-4	B	94319	83303	35350	17387	16874	7560.4	1.29939	0.19637	-2.34835	down
pme3705	C6H10O7	D-Glucoronic acid*	Others	Saccharides and Alcohols	6556-12-3	B	88928	97944	65759	16262	12937	6114.3	1.39107	0.139782	-2.83875	down
Xmgn006542	C10H10O4	Dimethyl Phthalate	Phenolic acids	Phenolic acids	131-11-3	B	80179	107770	101380	42189	32226	29805	1.40536	0.360213	-1.47308	down
mws0014	C10H10O4	Ferulic acid	Phenolic acids	Phenolic acids	537-98-4	A	21064000	5506400	12873000	975870	1723800	1285600	1.38751	0.101038	-3.30703	down
Lmdn003756	C10H10O4	Methyl caffeate	Phenolic acids	Phenolic acids	3843-74-1	A	129220	91156	86142	37905	3744.5	2155.8	1.20234	0.142913	-2.80679	down
pme0534	C6H12O7	Gluconic acid	Others	Saccharides and Alcohols	526-95-4	A	264040	167160	203170	192830	137500	80515	0.920143	0.647643	-0.62673	insig
Lmlp002205	C11H16O3	Isololiolide	Terpenoids	Terpene	38274-00-9	B	19756	44168	24071	32780	30471	21923	0.0840502	0.967941	-0.0470084	insig
pme3827	C9H11NO4	3,4-Dihydroxy-L-phenylalanine (L-Dopa)	Amino acids and derivatives	Amino acids and derivatives	59-92-7	B	16387	26234	19993	29232	17914	19827	0.284111	1.06962	0.0970943	insig
pmb2497	C9H10O5	4-Hydroxy-3-methoxymandelate	Phenolic acids	Phenolic acids	55-10-7	B	219250	148730	210010	157450	203770	168390	0.426112	0.916296	-0.126114	insig
mws0027	C9H10O5	Syringic acid	Phenolic acids	Phenolic acids	530-57-4	B	6898.4	4162.1	1488.2	5450.4	9	5717.7	0.511517	0.890698	-0.166992	insig
Zmzn000079	C4H9O7P	D-Erythrose-4-phosphate	Others	Saccharides and Alcohols	585-18-2	B	154200	101910	149610	51615	76460	65221	1.35118	0.476427	-1.06967	down
pmb2640	C12H24O2	Dodecanoic acid (Lauric acid)	Lipids	Free fatty acids	143-07-7	A	96093	98104	85213	81650	129670	77990	0.0293315	1.03543	0.0502325	insig
mws5037	C9H18N2O3	L-Alanyl-L-leucine	Amino acids and derivatives	Amino acids and derivatives	3303-34-2	B	55799	60833	44550	55909	83526	64342	0.877504	1.26427	0.338301	insig
NK10251888	C8H18N4O2	NG,NG-Dimethyl-L-arginine	Amino acids and derivatives	Amino acids and derivatives	30315-93-6	A	101170	95665	116210	110120	80961	89375	0.663569	0.895897	-0.158596	insig
mws0018	C10H26N4	Spermine	Alkaloids	Phenolamine	71-44-3	B	6677600	6965500	5378200	5712000	5916700	5775100	0.667968	0.914964	-0.128214	insig
mws0282	C11H12N2O2	L-Tryptophan	Amino acids and derivatives	Amino acids and derivatives	73-22-3	A	3728000	3189100	3857800	5387800	5575500	2814000	0.620963	1.27865	0.354619	insig
Zmtn001464	C10H7NO4	4,8-Dihydroxyquinoline-2-carboxylic acid	Organic acids	Organic acids	59-00-7	B	9	3539.9	1797.9	27644	12213	11616	1.05075	9.62688	3.26707	up
pmb0818	C11H11NO3	Methoxyindoleacetic acid	Alkaloids	Plumerane	3471-31-6	B	373790	316200	331330	590160	490690	238300	0.504641	1.29161	0.369174	insig
pme1261	C9H19NO4	D-Panthenol	Others	Saccharides and Alcohols	81-13-0	B	17971	6989.4	10753	23540	56027	249990	1.10829	9.22782	3.20599	up
mws4173	C11H10O4	5,7-Dimethoxycoumarin (Limettin)(Citropten)	Lignans and Coumarins	Coumarins	487-06-9	B	9	9	9	251740	316390	178720	1.47189	27661.1	14.7556	up
pmb1587	C13H18O2	4-Hydroxy-3,5-diisopropylbenzaldehyde	Phenolic acids	Phenolic acids	10537-86-7	B	4794.5	3434	2752.8	4386	3618.5	4101.2	0.486712	1.10239	0.140638	insig
Lmln010063	C14H22O	2,6-Di-tert-butylphenol	Phenolic acids	Phenolic acids	128-39-2	A	354840	414640	278900	296550	366270	347410	0.166386	0.963611	-0.0534779	insig
Zmgn002106	C11H13NO3	N-Acetyl-L-phenylalanine	Amino acids and derivatives	Amino acids and derivatives	2018-61-3	A	104260	62366	57248	381660	169680	56708	0.839818	2.71603	1.4415	insig
mws1014	C10H8O5	Fraxetin (7,8-Dihydroxy-6-methoxycoumarin)	Lignans and Coumarins	Coumarins	574-84-5	B	179290	140300	134740	578930	552520	178870	1.14939	2.88407	1.52811	up
mws1212	C11H12O4	Methyl ferulate	Phenolic acids	Phenolic acids	2309-07-1	A	8954800	12695000	9944800	2233800	2744100	1825100	1.43687	0.215322	-2.21544	down
mws2184	C11H12O4	Ethyl caffeate	Phenolic acids	Phenolic acids	102-37-4	B	12029	4594.2	10068	6354.3	15539	4077.3	0.177722	0.973002	-0.0394848	insig
pmb2620	C11H12O4	3,4-Dimethoxycinnamic acid	Phenolic acids	Phenolic acids	14737-89-4	A	4325900	6172900	5048200	860400	1378800	952120	1.4383	0.205269	-2.28441	down
pme3443	C11H12O4	Sinapinaldehyde	Phenolic acids	Phenolic acids	4206-58-0	B	11157	9313.6	9263.5	14842	14220	10249	1.06979	1.32208	0.402815	insig
Zmyn000108	C6H10O8	D-Saccharic acid*	Others	Saccharides and Alcohols	87-73-0	A	567510	426600	568090	790330	721740	619290	1.17819	1.36433	0.448195	insig
Zmpn000199	C6H10O8	D-Galactaric acid*	Others	Saccharides and Alcohols	526-99-8	A	1178600	987840	905000	848290	844950	649450	1.1033	0.762733	-0.390749	insig
Hmcn000192	C7H14O7	Sedoheptulose	Others	Saccharides and Alcohols	3019-74-7	A	547990	380970	390060	533010	552570	341790	0.274629	1.08214	0.113893	insig
mws0853	C11H14O4	Sinapyl alcohol	Phenolic acids	Phenolic acids	537-33-7	B	9	2681.1	1550.5	3448	14273	10759	0.96652	6.71603	2.74761	insig
Zmgn003633	C12H20O3	12-Oxo-10E-Dodecenoic Acid	Lipids	Free fatty acids	65410-38-0	B	931.27	1702.1	2940.8	896.45	2209.9	2165.5	0.0714675	0.945764	-0.0804477	insig
mws0863	C5H11O7P	2-Deoxyribose-5'-phosphate	Nucleotides and derivatives	Nucleotides and derivatives	102916-66-5	B	24454	35059	21968	14259	21090	9439.9	1.10029	0.549685	-0.863322	insig
pmb2507	C5H11O7P	2-Deoxyribose-1-phosphate	Nucleotides and derivatives	Nucleotides and derivatives	17210-42-3	B	380930	101900	185610	89463	125570	78487	0.983586	0.439112	-1.18734	insig
pmb2873	C13H13NO2	3-(2-Naphthyl)-L-alanine	Amino acids and derivatives	Amino acids and derivatives	58438-03-2	B	10595	6800.8	16061	10351	10313	19910	0.395073	1.21273	0.278256	insig
pme0170	C8H16N4O3	N-Acetyl-L-Arginine	Amino acids and derivatives	Amino acids and derivatives	155-84-0	A	16896	20507	15964	41366	35259	31782	1.42457	2.03135	1.02244	up
mws5045	C12H24O3	12-Hydroxydodecanoic acid	Lipids	Free fatty acids	505-95-3	A	1687.8	1043	1146	5147.3	6544.7	6778	1.42775	4.76424	2.25225	up
mws0677	C12H14N2O2	N-Acetyl-5-hydroxytryptamine	Alkaloids	Alkaloids	1210-83-9	B	242220	254670	237100	56401	149820	117200	1.2574	0.440634	-1.18235	down
Lmrj001698	C9H18N2O4	L-Seryl-L-Isoleucine	Amino acids and derivatives	Amino acids and derivatives	91086-51-0	A	2573300	371100	872130	285910	90017	140370	1.19564	0.135279	-2.88599	down
mws1337	C9H17NO5	D-Pantothenic Acid	Others	Vitamin	79-83-4	A	802380	697010	747140	893310	2064200	1130900	1.04665	1.81988	0.863842	insig
pme1228	C11H12N2O3	5-Hydroxy-L-tryptophan	Amino acids and derivatives	Amino acids and derivatives	56-69-9	A	9	9	9	20680	10555	12420	1.47263	1616.85	10.659	up
Hmyp002656	C11H11NO4	Methyl dioxindole-3-acetate	Others	Others	57061-18-4	A	9228.2	5297.1	4618.2	21841	16561	9387.4	1.20651	2.49638	1.31984	up
mws4174	C8H15NO6	N-Acetyl-D-mannosamine	Others	Saccharides and Alcohols	7772-94-3	B	34373	19672	36585	33996	31537	14823	0.305177	0.886638	-0.173583	insig
mws2608	C8H15NO6	N-Acetyl-D-galactosamine	Others	Saccharides and Alcohols	1811-31-0	B	27786	18511	16338	18292	20631	14248	0.531993	0.848902	-0.236329	insig
pme2755	C8H15NO6	N-Acetyl-D-glucosamine	Others	Saccharides and Alcohols	7512-17-6	B	147470	157870	136850	142380	129800	152730	0.445628	0.960922	-0.0575091	insig
mws5042	C11H14N2O3	L-Glycyl-L-phenylalanine	Amino acids and derivatives	Amino acids and derivatives	721-66-4	B	700480	159170	295350	172750	120960	124280	1.02623	0.361896	-1.46635	down
Hmgp005956	C13H18O3	Dehydrovomifoliol	Terpenoids	Monoterpenoids	15764-81-5	B	92750	103130	79602	86824	74431	64167	0.934752	0.818282	-0.28933	insig
mws0520	C11H13NO4	N-Acetyl-L-tyrosine	Amino acids and derivatives	Amino acids and derivatives	537-55-3	A	37270	46380	42697	68888	56948	65751	1.3775	1.51636	0.600608	insig
pmb2643	C14H26O2	Myristoleic acid	Lipids	Free fatty acids	544-64-9	A	2501.3	3186	2523.5	1113.5	5536.6	1080	0.48261	0.941455	-0.0870357	insig
pme1194	C9H13N3O4	2'-Deoxycytidine	Nucleotides and derivatives	Nucleotides and derivatives	951-77-9	B	35035	20425	31932	29048	17174	15161	0.832991	0.702387	-0.509662	insig
mws0119	C14H28O2	Myristic Acid	Lipids	Free fatty acids	544-63-8	A	16901000	10206000	9584700	9636900	10791000	8759900	0.700864	0.795488	-0.330088	insig
Lmhp001461	C11H20N2O3	L-Prolyl-L-Leucine	Amino acids and derivatives	Amino acids and derivatives	52899-07-7	B	125920	48507	72064	35112	53546	51039	0.976341	0.566743	-0.819234	insig
mws0474	C12H22O4	Dodecanedioic aicd	Organic acids	Organic acids	693-23-2	A	1145.7	452.09	1548.2	925.78	384.88	618.6	0.634329	0.613244	-0.705467	insig
Lmhp001670	C11H22N2O3	L-Valyl-L-Leucine	Amino acids and derivatives	Amino acids and derivatives	3989-97-7	B	2721200	436330	1149000	382350	150760	215680	1.17666	0.173873	-2.52389	down
pmb0962	C10H22N2O4	L-Lysine-Butanoic Acid	Amino acids and derivatives	Amino acids and derivatives	80407-71-2	B	12318000	10045000	9602900	17454000	12289000	9863300	0.720134	1.23902	0.309196	insig
mws4176	C12H16N2O3	L-Alanyl-L-Phenylalanine	Amino acids and derivatives	Amino acids and derivatives	3061-90-3	B	237740	34866	110550	28055	15813	23433	1.17247	0.175649	-2.50923	down
Lmhn003240	C11H10O6	Benzoylmalic acid	Phenolic acids	Phenolic acids	22138-51-8	A	2173100	1689100	2176100	78649	95234	107410	1.47206	0.0465848	-4.424	down
pmn001669	C12H14O5	Methyl sinapate	Phenolic acids	Phenolic acids	20733-94-2	A	9285.7	20745	8076.9	5929.7	3544.5	1362.9	1.12518	0.284382	-1.8141	down
pme2827	C16H32O	Palmitaldehyde	Lipids	Free fatty acids	629-80-1	B	5019100	4797200	4781300	4744100	4912300	4898300	0.157745	0.997061	-0.00424609	insig
pme0264	C10H14N2O5	Thymidine	Nucleotides and derivatives	Nucleotides and derivatives	50-89-5	B	189790	110100	129060	103620	91353	69251	1.11772	0.615979	-0.699048	insig
mws0359	C15H30O2	Pentadecanoic Acid	Lipids	Free fatty acids	1002-84-2	A	133030	117630	127990	117260	130080	91227	0.693693	0.894142	-0.161424	insig
pme3732	C9H13N3O5	Cytidine	Nucleotides and derivatives	Nucleotides and derivatives	65-46-3	B	1373500	407380	699770	311880	269830	196770	1.20404	0.313821	-1.67199	down
ML10180524	C9H13N3O5	Cytarabine	Nucleotides and derivatives	Nucleotides and derivatives	147-94-4	B	724260	212250	551610	291920	206760	140880	0.983281	0.429777	-1.21834	insig
mws0248	C9H12N2O6	Uridine	Nucleotides and derivatives	Nucleotides and derivatives	58-96-8	A	1840000	302320	873320	197560	187970	156790	1.21071	0.179836	-2.47525	down
pme2266	C10H16N2O3S	Biotin	Others	Vitamin	58-85-5	B	200540	155850	204770	195930	277940	199760	0.744961	1.20042	0.263544	insig
Lmhp002031	C12H24N2O3	L-Leucyl-L-Leucine	Amino acids and derivatives	Amino acids and derivatives	3303-31-9	B	1242600	246820	668020	199770	115690	143300	1.20169	0.212641	-2.23351	down
pmb2591	C13H14N2O3	N-Acetyl-L-Tryptophan	Amino acids and derivatives	Amino acids and derivatives	1218-34-4	A	20929000	11676000	13623000	28279000	23754000	7841600	0.279331	1.2952	0.373177	insig
mws0124	C13H14N2O3	N-(3-Indolylacetyl)-L-alanine	Amino acids and derivatives	Amino acids and derivatives	57105-39-2	B	10683	10662	11919	9120	14194	13770	0.38333	1.11484	0.156835	insig
pme2563	C8H14N2O5S	γ-Glu-Cys	Amino acids and derivatives	Amino acids and derivatives	636-58-8	B	26162	23358	8979	20794	11853	4250.1	0.601246	0.63073	-0.664905	insig
pme3961	C10H13N5O3	2'-Deoxyadenosine	Nucleotides and derivatives	Nucleotides and derivatives	958-09-8	A	299520	125110	164360	157470	113670	82190	0.876301	0.599891	-0.737227	insig
Lmhn002629	C11H10O7	Benzoyltartaric acid	Phenolic acids	Phenolic acids	-	B	9	9	9	1162200	921700	765490	1.4729	105533	16.6873	up
Lmhn003373	C11H10O7	p-Hydroxybenzoylmalic acid	Phenolic acids	Phenolic acids	-	B	689170	396010	550790	12034	10695	14128	1.46874	0.0225291	-5.47206	down
Hmbp003234	C12H14O6	1-O-Caffeoylglycerol	Lipids	Glycerol ester	-	B	49460	60834	60463	131790	64276	53973	0.757385	1.4643	0.550208	insig
mws0361	C16H30O2	Palmitoleic Acid	Lipids	Free fatty acids	373-49-9	A	3714.1	3334.7	3449.7	4255.8	3472.3	2229.2	0.280797	0.94845	-0.0763567	insig
pma3101	C11H14NO6+	Nicotinate D-ribonucleoside	Others	Vitamin	17720-18-2	B	3042100	742170	1367700	635630	465030	314860	1.16256	0.274753	-1.86379	down
mws1488	C16H32O2	Palmitic acid	Lipids	Free fatty acids	57-10-3	A	19945	12734	14416	16896	14755	15853	0.117529	1.00868	0.0124751	insig
mws0120	C8H20NO6P	Choline Alfoscerate	Lipids	PC	28319-77-9	B	85955	121870	108270	34629	46841	20055	1.32839	0.321185	-1.63852	down
pme1187	C10H14N2O6	5-Methyluridine	Nucleotides and derivatives	Nucleotides and derivatives	1463-10-1	B	4167.9	2384.1	2689.9	4887	3574.8	9	0.532699	0.916565	-0.125691	insig
Zmyn000110	C6H14NO8P	D-Glucosamine 1-phosphate	Others	Saccharides and Alcohols	2152-75-2	B	56314	53433	80795	22674	52516	17403	1.11475	0.485945	-1.04113	down
mws1090	C6H13O9P	Glucose-1-phosphate*	Others	Saccharides and Alcohols	59-56-3	A	4720800	4312000	4730800	2166400	2094800	1807300	1.45108	0.440909	-1.18145	down
mws0866	C6H13O9P	D-Glucose 6-phosphate*	Others	Saccharides and Alcohols	56-73-5	A	5852800	5965100	6183900	2396600	2778900	1845100	1.42222	0.389994	-1.35847	down
pme3313	C6H13O9P	D-Fructose 6-phosphate*	Others	Saccharides and Alcohols	643-13-0	A	904560	620130	962210	330910	412450	346660	1.39019	0.438305	-1.18999	down
Cmpp007319	C15H16O4	7-Methoxy-5-Prenyloxycoumarin	Lignans and Coumarins	Coumarins	35590-41-1	A	2241.9	3391.1	2555.5	2519.9	2511.5	2652.5	0.26018	0.938377	-0.0917605	insig
Zmpn000095	C6H15O9P	Sorbitol-6-phosphate	Others	Saccharides and Alcohols	20479-58-7	B	30846	34399	56559	40062	75636	28531	0.260808	1.18411	0.2438	insig
Lmhp001732	C14H18N2O3	L-Prolyl-L-Phenylalanine	Amino acids and derivatives	Amino acids and derivatives	13589-02-1	B	53490	51220	39421	40242	45522	29164	0.843058	0.797386	-0.32665	insig
mws0715	C13H16N2O4	Phenylacetyl-L-glutamine	Amino acids and derivatives	Amino acids and derivatives	28047-15-6	B	13894	7843.1	7287.2	35588	15404	12171	1.02398	2.17621	1.12182	up
Lmlp003161	C14H20N2O3	N-Feruloylputrescine	Alkaloids	Phenolamine	501-13-3	B	22723	25301	11388	24220	16554	12102	0.188474	0.889989	-0.168141	insig
Lmhp002001	C14H20N2O3	L-Valyl-L-Phenylalanine	Amino acids and derivatives	Amino acids and derivatives	3918-92-1	B	362700	90740	233270	81431	55016	62377	1.17691	0.289531	-1.78821	down
pme1184	C10H13N5O4	2'-Deoxyguanosine	Nucleotides and derivatives	Nucleotides and derivatives	961-07-9	B	334470	216770	266950	241110	154990	146790	1.04751	0.663526	-0.591776	insig
pme0230	C10H13N5O4	Adenosine	Nucleotides and derivatives	Nucleotides and derivatives	58-61-7	A	825350	370120	688850	623680	442250	416480	0.510796	0.786708	-0.346099	insig
pme2890	C8H16N2O4S2	L-Homocystine	Amino acids and derivatives	Amino acids and derivatives	626-72-2	B	33534	4007.1	16102	11725	4306	5131.1	0.671641	0.394498	-1.34191	insig
mws1060	C10H12N4O5	9-(Arabinosyl)hypoxanthine	Nucleotides and derivatives	Nucleotides and derivatives	7013-16-3	A	118530	92488	93084	96379	80953	94065	0.725563	0.892454	-0.164151	insig
pmp000087	C13H16O6	2-Feruloyl-sn-glycerol	Phenolic acids	Phenolic acids	-	A	7544900	7150000	5200700	5660300	6286400	5847100	0.57253	0.894359	-0.161075	insig
pmp000086	C13H16O6	1-Feruloyl-sn-glycerol	Phenolic acids	Phenolic acids	-	B	6360400	5439900	6720400	4681300	4831900	5381100	1.22882	0.804197	-0.314378	insig
mws0383	C17H32O2	10-Heptadecenoic Acid	Lipids	Free fatty acids	29743-97-3	A	445190	337160	269090	388770	386480	137730	0.392973	0.868314	-0.203711	insig
mws1175	C16H14O4	Pinostrobin	Flavonoids	Dihydroflavone	480-37-5	B	1446.4	3270.7	4163.3	2647.9	3280.8	3239.8	0.271857	1.03244	0.0460611	insig
mws1297	C13H18O6	Benzyl glucoside	Phenolic acids	Phenolic acids	4304-12-5	A	7603.7	6621.1	9555	52692	86708	90168	1.43909	9.65391	3.27111	up
pme0376	C15H12O5	Naringenin (5,7,4'-Trihydroxyflavanone)	Flavonoids	Dihydroflavone	480-41-1	A	48556	51882	57019	49155	26538	26545	1.06417	0.649307	-0.623026	insig
pme3472	C12H16O7	Arbutin	Phenolic acids	Phenolic acids	497-76-7	B	76222	100240	94333	33686	31739	15330	1.33817	0.298215	-1.74558	down
Lmmn003323	C16H32O3	2-Hydroxyhexadecanoic acid	Organic acids	Organic acids	764-67-0	B	597640	182340	276630	140580	154330	141260	1.10661	0.412801	-1.27648	down
pmp001264	C16H35NO2	Hexadecylsphingosine	Lipids	Sphingolipids	-	A	2463500	2497600	2541600	1934500	2267000	2369600	1.12239	0.875831	-0.191275	insig
pmb1574	C18H28O2	9,12-Octadecadien-6-Ynoic Acid	Lipids	Free fatty acids	61481-29-6	B	51422	31881	38981	13139	29629	21193	1.18208	0.523053	-0.934971	insig
mws1038	C11H22N2O4S	Pantetheine	Others	Others	496-65-1	B	2397.5	7408.3	3682.9	11822	9205	5680.7	1.05324	1.98001	0.985504	insig
Lmlp012720	C16H22O4	Dibutyl phthalate*	Phenolic acids	Phenolic acids	84-74-2	A	16132000	17617000	13969000	16079000	19604000	14857000	0.375062	1.05914	0.0828921	insig
Lmxp011770	C16H22O4	Diisobutyl phthalate*	Phenolic acids	Phenolic acids	84-69-5	A	16304000	17878000	14536000	15649000	19701000	15077000	0.219387	1.03508	0.0497415	insig
mws5035	C15H22N2O3	L-Leucyl-L-phenylalanine	Amino acids and derivatives	Amino acids and derivatives	56217-82-4	B	491550	92364	164150	31146	33892	40563	1.29319	0.141166	-2.82454	down
Lmbn005923	C18H30O2	Crepenynic acid	Lipids	Free fatty acids	2277-31-8	A	459140	256350	364380	266000	205760	230860	1.09697	0.650652	-0.620041	insig
pmb0889	C18H30O2	Punicic acid (9Z,11E,13Z-octadecatrienoic acid)	Lipids	Free fatty acids	544-72-9	B	234460	201280	192170	164510	206730	189920	0.825408	0.893695	-0.162146	insig
mws0367	C18H30O2	α-Linolenic Acid*	Lipids	Free fatty acids	463-40-1	A	28308000	15863000	23776000	16790000	13447000	15140000	1.06961	0.667829	-0.582449	insig
mws0366	C18H30O2	γ-Linolenic Acid*	Lipids	Free fatty acids	506-26-3	A	30900000	18204000	22934000	17913000	14204000	15197000	1.13421	0.656792	-0.606491	insig
Lmhn002926	C13H12O7	p-Coumaroylmalic acid	Phenolic acids	Phenolic acids	-	A	3591900	7319400	6834100	3440100	4611300	4820800	0.727339	0.725382	-0.463186	insig
mws0629	C13H16N2O5	L-Aspartyl-L-Phenylalanine	Amino acids and derivatives	Amino acids and derivatives	13433-09-5	A	39991	27003	23274	25368	31125	25524	0.327694	0.908594	-0.138292	insig
mws1491	C18H32O2	Linoleic acid	Lipids	Free fatty acids	60-33-3	A	53119000	32711000	41434000	37118000	30682000	30904000	0.909186	0.775585	-0.366644	insig
Lmbn006152	C18H32O2	(9Z,11E)-Octadecadienoic acid	Lipids	Free fatty acids	2540-56-9	B	35482	17552	28547	25031	17215	15900	0.783563	0.712739	-0.488553	insig
Hmhp001812	C11H15N5O4	2'-O-Methyladenosine	Nucleotides and derivatives	Nucleotides and derivatives	2140-79-6	A	386510	58434	124840	78967	36116	34768	0.995489	0.262996	-1.92689	insig
YC512118	C18H35NO	Oleamide (9-Octadecenamide)	Lipids	Free fatty acids	301-02-0	A	13141	7909.4	6354.9	23827	18939	72796	1.17488	4.21678	2.07614	up
mws2623	C18H34O2	11-Octadecanoic acid(Vaccenic acid)	Lipids	Free fatty acids	506-17-2	A	2653400	1226800	1917400	2041500	1923200	1781400	0.10121	0.991117	-0.0128727	insig
pme1178	C10H13N5O5	Guanosine	Nucleotides and derivatives	Nucleotides and derivatives	118-00-3	A	27458000	8689700	15399000	9281600	4215600	3102800	1.12815	0.322038	-1.6347	down
pmp001252	C17H17NO3	p-Coumaroyltyramine	Alkaloids	Phenolamine	36417-86-4	B	3193.3	18476	8119.4	9	9	9	1.45133	0.000906384	-10.1076	down
mws0051	C16H12O5	Acacetin	Flavonoids	Flavonoid	480-44-4	B	275940	1070500	948950	221940	209890	126490	1.16675	0.243235	-2.03958	down
mws0129	C16H12O5	Genkwanin (Apigenin 7-methyl ether)	Flavonoids	Flavonoid	437-64-9	B	269920	1071500	905940	216200	201860	120530	1.16837	0.239655	-2.06097	down
mws0668	C10H12N4O6	Xanthosine	Nucleotides and derivatives	Nucleotides and derivatives	146-80-5	A	860790	640380	780200	846390	524330	338150	0.749811	0.749054	-0.416858	insig
Zmyn005026	C18H36O2	16-Methylheptadecanoic acid	Lipids	Free fatty acids	2724-58-5	B	5652100	8723200	6411200	6436600	9920300	8319300	0.629271	1.18713	0.247473	insig
mws1489	C18H36O2	Stearic Acid	Lipids	Free fatty acids	57-11-4	A	13281000	20201000	15062000	15101000	19840000	19267000	0.533257	1.11668	0.159213	insig
mws1068	C15H10O6	Kaempferol (3,5,7,4'-Tetrahydroxyflavone)	Flavonoids	Flavonols	520-18-3	A	421150	329740	435890	73036	39193	31147	1.41847	0.120811	-3.04918	down
mws1521	C13H18O7	Salicin	Phenolic acids	Phenolic acids	138-52-3	A	192930	128480	161770	237030	150450	136810	0.257553	1.08508	0.117804	insig
mws1094	C15H12O6	Aromadendrin (Dihydrokaempferol)	Flavonoids	Dihydroflavonol	480-20-6	B	5844	7158.2	7544.7	7415.9	7019.8	8358.8	0.736706	1.10939	0.149765	insig
pmn001686	C16H32O4	10,16-Dihydroxypalmitic acid	Lipids	Free fatty acids	3233-90-7	A	56447	43810	62810	50209	66972	49721	0.0965895	1.02352	0.0335364	insig
pme3163	C7H15O10P	D-Sedoheptuiose 7-phosphate	Others	Saccharides and Alcohols	2646-35-7	B	770540	1335600	778090	1088900	493210	404400	0.719675	0.688749	-0.53795	insig
pmb2657	C10H18N4O6	Argininosuccinic acid	Organic acids	Organic acids	2387-71-5	B	264980	225630	227840	121420	100310	70763	1.37139	0.407117	-1.29649	down
Zmyn004548	C18H28O3	12-Oxo-phytodienoic acid	Lipids	Free fatty acids	85551-10-6	B	17283	4395	9573.9	2597.5	3199.5	6971.4	0.990806	0.408564	-1.29137	insig
pmb2792	C18H30O3	13-Hydroxy-6,9,11-octadecatrienoic acid	Lipids	Free fatty acids	74784-20-6	B	25342	54197	34577	27331	25079	15923	0.937822	0.598803	-0.739847	insig
pmb2787	C18H30O3	9-Oxo-10E,12Z-octadecadienoic acid	Lipids	Free fatty acids	54232-59-6	A	38537	21741	30883	27538	19164	26342	0.682409	0.801264	-0.319651	insig
pmb2786	C18H30O3	9-Hydroxy-10,12,15-octadecatrienoic acid*	Lipids	Free fatty acids	89886-42-0	B	25601	9074.9	18699	11239	9486.7	13988	0.734109	0.650375	-0.620656	insig
Lmbn005443	C18H30O3	13-KODE; (9Z,11E)-13-Oxooctadeca-9,11-dienoic acid*	Lipids	Free fatty acids	54739-30-9	B	25669	10951	17504	10412	10184	11362	1.03509	0.590459	-0.760091	insig
Zmpn003368	C18H30O3	13S-Hydroxy-9Z,11E,15Z-octadecatrienoic acid	Lipids	Free fatty acids	87984-82-5	B	125380	81260	79466	167820	164990	121400	1.16968	1.58756	0.66681	insig
Lmqp000329	C8H14N3O7P	5-Aminoimidazole ribonucleotide	Nucleotides and derivatives	Nucleotides and derivatives	25635-88-5	A	210880	338530	236180	75346	81911	36591	1.34702	0.246755	-2.01885	down
Lmhn102068	C13H12O8	2-O-Caffeoylmalic acid	Phenolic acids	Phenolic acids	53755-04-7	B	5472.3	4893.3	5433.4	1596.6	4301.7	6593.8	0.668511	0.790689	-0.338817	insig
pmb2799	C18H32O3	12,13-Epoxy-9-Octadecenoic Acid	Lipids	Free fatty acids	6799-85-5	B	29735	27904	28764	33311	30666	31216	1.2497	1.10173	0.139774	insig
Lmbn005369	C18H32O3	13(S)-HODE;13(S)-Hydroxyoctadeca-9Z,11E-dienoic acid*	Lipids	Free fatty acids	10219-69-9	A	253200	201930	200050	187670	259660	196170	0.163194	0.982173	-0.0259512	insig
Lmbn005662	C18H32O3	9(10)-EpOME;(9R,10S)-(12Z)-9,10-Epoxyoctadecenoic acid	Lipids	Free fatty acids	16833-56-0	A	121080	71035	85805	74717	78009	82792	0.634376	0.847431	-0.238832	insig
Rfmb091	C18H32O3	9S-Hydroxy-10E,12Z-octadecadienoic acid*	Lipids	Free fatty acids	15514-85-9	A	254690	204680	199740	185690	257780	193970	0.248818	0.967122	-0.0482297	insig
pme1474	C11H15N5O3S	5'-Deoxy-5'-(methylthio)adenosine	Nucleotides and derivatives	Nucleotides and derivatives	2457-80-9	A	6823900	8385300	5995100	4876000	3979300	5855700	1.14233	0.693774	-0.527462	insig
pmb0197	C11H15N5O5	N7-Methylguanosine	Nucleotides and derivatives	Nucleotides and derivatives	20244-86-4	B	47529	45523	50382	43414	39434	31404	1.09425	0.796548	-0.328168	insig
Zmyn004714	C18H34O3	Ricinoleic acid	Lipids	Free fatty acids	141-22-0	A	255980	143640	159770	186810	141580	129770	0.575491	0.819035	-0.288003	insig
Zmgn005057	C18H34O3	9,10-Epoxyoctadecanoic Acid	Lipids	Free fatty acids	2443-39-2	A	419180	249220	413740	193120	221300	342790	0.917859	0.699734	-0.515122	insig
pmf0297	C20H42O	1-Eicosanol	Lipids	Free fatty acids	629-96-9	B	245450	148490	172220	195010	138630	133760	0.62653	0.825562	-0.276552	insig
Lmhn001386	C12H12O9	Vnilloyltartaric acid	Phenolic acids	Phenolic acids	-	B	16152	15050	13147	22464	8289.7	10485	0.334555	0.929868	-0.104903	insig
pmp000001	C16H12O6	Hispidulin (5,7,4'-Trihydroxy-6-methoxyflavone)	Flavonoids	Flavonoid	1447-88-7	B	17722	14977	14103	9205.5	4856.2	21168	0.706226	0.752739	-0.409778	insig
Zmhn001926	C13H16O8	1-O-Salicyl-D-glucose	Phenolic acids	Phenolic acids	60517-74-0	A	25315000	13157000	16059000	26156000	11241000	7502100	0.459831	0.823368	-0.28039	insig
pmb3142	C13H16O8	Salicylic acid-2-O-glucoside	Phenolic acids	Phenolic acids	10366-91-3	A	10306000	7892700	7857700	5588300	6820000	3527100	1.12792	0.611573	-0.709403	insig
pme2816	C20H28O2	4-Oxoretinol	Others	Vitamin	62702-55-0	B	3280.9	2504.8	2635.1	1841.5	3001.1	4226.4	0.0129946	1.07698	0.106986	insig
Lmqn008288	C18H36O3	3-Hydroxyoctadecanoic Acid	Lipids	Free fatty acids	45261-96-9	B	406030	378320	479120	507380	424260	417330	0.517186	1.06767	0.0944669	insig
pme2954	C15H10O7	Quercetin	Flavonoids	Flavonols	117-39-5	A	896420	700820	811360	106670	97215	55952	1.44107	0.107879	-3.21252	down
Cmsp004086	C16H14O6	Dihydrokaempferide	Flavonoids	Flavonols	137225-59-3	B	308620	179310	360430	526750	314980	167910	0.236218	1.19011	0.251092	insig
Zmhn000892	C13H18O8	4-O-Glucosyl-3,4-dihydroxybenzyl alcohol	Phenolic acids	Phenolic acids	-	A	109530	169390	103920	145160	196580	184480	0.999448	1.37452	0.458925	insig
mws1375	C12H21N3O6	Nicotianamine	Amino acids and derivatives	Amino acids and derivatives	34441-14-0	B	161930	122560	118740	229230	108150	55915	0.258889	0.975361	-0.0359911	insig
mws0044	C15H12O7	Dihydroquercetin(Taxifolin)	Flavonoids	Dihydroflavonol	480-18-2	B	19018	34956	44948	30992	27193	11147	0.586355	0.700875	-0.51277	insig
pme1086	C10H17N3O6S	Glutathione reduced form	Amino acids and derivatives	Amino acids and derivatives	70-18-8	A	97226	66353	85456	182000	94531	114640	1.03142	1.57075	0.651451	insig
pmn001610	C20H36O2	Eicosadienoic acid	Lipids	Free fatty acids	5598-38-9	A	93565	24544	45109	45140	21762	26722	0.677046	0.573613	-0.80185	insig
Lmhn003074	C14H14O8	Feruloylmalic acid	Phenolic acids	Phenolic acids	-	A	4121200	9946000	9867300	6500500	5725100	8276000	0.195862	0.856571	-0.223355	insig
pmb2791	C18H30O4	9-Hydroperoxy-10E,12,15Z-octadecatrienoic acid	Lipids	Free fatty acids	111004-08-1	A	107730	325870	192350	119190	93157	60192	1.01639	0.435401	-1.19958	down
pmn001606	C20H38O2	Eicosenoic acid	Lipids	Free fatty acids	26764-41-0	A	720230	1599400	807180	766930	923610	1426300	0.0615516	0.996811	-0.00460746	insig
Lmtp001399	C14H17NO7	5,6-Dihydroxyindole-5-O-β-glucoside	Alkaloids	Alkaloids	-	B	143630	168730	125150	9	9	9	1.47154	6.17129e-05	-13.9841	down
pme3967	C12H17N5O5	2-(Dimethylamino)guanosine	Nucleotides and derivatives	Nucleotides and derivatives	2140-67-2	B	127450	97781	103840	120910	100110	71968	0.50042	0.890349	-0.167557	insig
Lmhn001477	C13H12O9	2-Caffeoyl-L-tartaric acid (Caftaric acid)	Phenolic acids	Phenolic acids	67879-58-7	A	9	9	9	79789	58994	72481	1.47247	7824.59	12.9338	up
mws0636	C18H20N2O3	L-Phenylalanyl-L-phenylalanine	Amino acids and derivatives	Amino acids and derivatives	2577-40-4	A	55708	15768	50554	9233	9448	8990	1.27521	0.226756	-2.14079	down
Zmjn004133	C18H32O4	9S-Hydroperoxy-10E,12Z-octadecadienoic acid	Lipids	Free fatty acids	5502-91-0	A	40881	52459	51402	56489	51201	61906	0.955175	1.17171	0.228619	insig
Lmbn004685	C18H32O4	5S,8R-DiHODE; (5S,8R,9Z,12Z)-5,8-Dihydroxyoctadeca-9,12-dienoate	Lipids	Free fatty acids	-	A	8181.4	34458	14858	8562.6	6687.7	5801.9	0.997353	0.366142	-1.44953	insig
Lmbn005287	C18H32O4	7S,8S-DiHODE; (9Z,12Z)-(7S,8S)-Dihydroxyoctadeca-9,12-dienoic acid	Lipids	Free fatty acids	143288-65-7	A	247110	94524	140890	99620	146160	84855	0.689747	0.68522	-0.545361	insig
pmn001689	C18H32O4	9-Hydroxy-12-oxo-15(Z)-octadecenoic acid	Lipids	Free fatty acids	-	B	132450	44435	64239	47043	38499	48006	0.901036	0.553856	-0.852417	insig
pmb2804	C18H32O4	13S-Hydroperoxy-9Z,11E-octadecadienoic acid	Lipids	Free fatty acids	33964-75-9	B	186360	185440	174810	190220	202630	232720	1.03323	1.14445	0.194659	insig
pmf0397	C20H40O2	Arachidic acid	Lipids	Free fatty acids	506-30-9	B	2174700	2138200	3556600	1691500	1483700	2784100	0.744523	0.757265	-0.401129	insig
mws1433	C18H19NO4	N-Feruloyltyramine	Alkaloids	Phenolamine	66648-43-9	A	298590	421480	294440	512310	853690	197940	0.47215	1.54157	0.624402	insig
mws1174	C17H14O6	3-O-Acetylpinobanksin	Flavonoids	Dihydroflavonol	52117-69-8	A	312.58	12459	22017	9	3302.6	4552.8	0.627033	0.226063	-2.14521	insig
Lmmn002179	C14H18O8	Methyl salicylate-2-O-glucoside	Phenolic acids	Phenolic acids	10019-60-0	B	39987	52622	48385	88260	94726	99523	1.42871	2.0037	1.00266	up
Lmbn005487	C18H34O4	12,13-DHOME; (9Z)-12,13-Dihydroxyoctadec-9-enoic acid	Lipids	Free fatty acids	263399-35-5	B	37576	29999	34218	23206	26529	17670	1.23453	0.662177	-0.594711	insig
mws0066	C16H12O7	Isorhamnetin	Flavonoids	Flavonols	480-19-3	A	2503700	1857300	2068800	39857	102190	73252	1.4608	0.0334846	-4.90036	down
Lmmn004912	C16H12O7	3-O-Methylquercetin	Flavonoids	Flavonols	1486-70-0	B	2381.7	5810.8	3369.5	5594.1	1672	3274.5	0.185164	0.911659	-0.133434	insig
pmb2871	C13H16O9	1-O-Gentisoyl-D-glucoside*	Phenolic acids	Phenolic acids	23445-11-6	A	482740	457090	497390	378620	345240	322000	1.38543	0.727697	-0.458591	insig
pmn001367	C13H16O9	Protocatechuic acid-4-O-glucoside*	Phenolic acids	Phenolic acids	-	A	254350	250300	271790	285260	234970	180540	0.550855	0.902542	-0.147933	insig
Lmfp001509	C13H16O9	1-O-Galloyl-rhamnose	Tannins	Tannin	-	B	165560	122370	150970	22062	20897	24081	1.46773	0.152746	-2.7108	down
Hmtn001120	C14H20O8	5-(2-Hydroxyethyl)-2-O-glucosylphenol	Phenolic acids	Phenolic acids	-	A	257410	292060	255340	41626	175240	172100	1.05132	0.483302	-1.049	down
pmb2221	C18H39NO3	4-Hydroxysphinganine	Lipids	Sphingolipids	554-62-1	A	142010	119730	114700	90491	126990	80313	0.943532	0.79108	-0.338105	insig
pmb0751	C16H16O7	Trans-5-O-(p-Coumaroyl)shikimate	Phenolic acids	Phenolic acids	-	B	129640	190650	210180	89675	130920	168290	0.856035	0.733095	-0.447928	insig
mws0582	C11H19N3O6S	S-(Methyl)glutathione	Amino acids and derivatives	Amino acids and derivatives	2922-56-7	A	60516	54405	47609	59198	72770	48552	0.494185	1.11069	0.151453	insig
pmn001513	C14H10O9	Digallic Acid	Tannins	Tannin	536-08-3	B	8876.1	8355.8	6845	3664.8	4500.5	5478	1.34346	0.566655	-0.819457	insig
pme3174	C9H14N3O8P	Cytidine 5'-monophosphate(Cytidylic acid)	Nucleotides and derivatives	Nucleotides and derivatives	63-37-6	B	299290	33584	139370	41497	44876	26066	0.966999	0.238095	-2.07039	insig
pme3188	C9H13N2O9P	Uridine 5'-monophosphate	Nucleotides and derivatives	Nucleotides and derivatives	58-97-9	B	1457200	107470	392570	217070	57215	67246	0.941934	0.174496	-2.51873	insig
mws0983	C20H39NO2	N-Oleoylethanolamine	Alkaloids	Alkaloids	111-58-0	B	273900	67372	97473	38008	35943	42353	1.20306	0.265083	-1.91548	down
Lmhn002140	C14H14O9	Feruloyltartaric acid (Fertaric acid)	Phenolic acids	Phenolic acids	-	B	9	9	9	4660700	2764100	2634400	1.47307	372563	18.5071	up
Zmhn002301	C15H18O8	p-Coumaric acid-4-O-glucoside	Phenolic acids	Phenolic acids	117405-48-8	A	21225000	26435000	27352000	27916000	19159000	21016000	0.466729	0.907735	-0.139657	insig
pmn001690	C16H24O7	3-Hydroxy-4-isopropylbenzylalcohol-3-O-glucoside	Phenolic acids	Phenolic acids	-	B	308340	210730	271680	107450	45501	43767	1.33842	0.248774	-2.00709	down
mws0884	C10H12N5O6P	Cyclic 3',5'-Adenylic acid	Nucleotides and derivatives	Nucleotides and derivatives	60-92-4	A	73663	38466	62889	80821	52834	49381	0.174944	1.04581	0.0646241	insig
Lmmn003663	C14H18O9	5-Glucosyloxy-2-Hydroxybenzoic acid methyl ester	Phenolic acids	Phenolic acids	-	B	82981	54811	52246	4361.6	5940.2	8119.6	1.4548	0.0969353	-3.36683	down
Lmtn002565	C14H18O9	1-O-Vanilloyl-D-Glucose	Phenolic acids	Phenolic acids	-	B	625700	676480	657810	1103600	1168300	926630	1.41892	1.63191	0.706563	insig
Zmhn001883	C14H18O9	Vanillic acid-4-O-glucoside	Phenolic acids	Phenolic acids	32142-31-7	B	54340	82784	65934	3232.4	7400.1	3886.2	1.44383	0.0715003	-3.80591	down
pmn001517	C15H22O8	3,4,5-Trimethoxyphenyl-1-O-Glucoside	Phenolic acids	Phenolic acids	-	B	3469100	2379800	2494600	8710700	9064200	6291100	1.40618	2.8844	1.52827	up
Hmqn003054	C18H34O5	9,10,11-Trihydroxy-12-octadecenoic acid	Lipids	Free fatty acids	61911-67-9	A	20419	24757	25660	22831	34361	35242	0.889838	1.3049	0.383941	insig
pmn001694	C18H34O5	9,10,13-Trihydroxy-11-Octadecenoic Acid	Lipids	Free fatty acids	29907-57-1	A	381930	370800	376560	353600	514090	533680	0.843645	1.24093	0.311422	insig
Lmbn004240	C18H34O5	9,10-Dihydroxy-12,13-epoxyoctadecanoic acid	Lipids	Free fatty acids	-	B	18983	16859	18152	20164	22014	19727	1.18796	1.14652	0.197257	insig
Lmbn003970	C18H34O5	9,12,13-TriHOME; 9(S),12(S),13(S)-Trihydroxy-10(E)-octadecenoic acid	Lipids	Free fatty acids	97134-11-7	A	29783	28959	26339	37023	49249	36418	1.26229	1.44204	0.528109	insig
pmp001284	C19H38O4	Monopalmitin	Lipids	Glycerol ester	542-44-9	A	13313	7737.9	8020.9	6588.7	5356.2	6152.2	1.13997	0.622497	-0.683862	insig
pme3184	C10H14N5O6P	2'-Deoxyadenosine-5'-monophosphate	Nucleotides and derivatives	Nucleotides and derivatives	653-63-4	A	228070	313250	335140	289080	231030	290120	0.331908	0.924435	-0.113357	insig
pmb0789	C14H21NO8	Pyridoxine-5'-O-glucoside	Others	Vitamin	-	B	382650	313400	423620	177660	175400	168530	1.43541	0.465843	-1.10209	down
Lmfn000604	C13H16O10	6-O-Galloyl-D-glucose	Tannins	Tannin	13186-19-1	A	151710	141230	127260	181460	241110	224390	1.31447	1.53965	0.6226	insig
pmn001518	C13H16O10	1-O-Galloyl-D-glucose	Tannins	Tannin	58511-73-2	A	406800	440180	507510	639340	359880	316090	0.184482	0.971074	-0.0423469	insig
Hmln000873	C13H16O10	2-O-Galloyl-D-glucose	Tannins	Tannin	-	B	527210	729670	675320	809290	520460	410000	0.372804	0.900399	-0.151364	insig
mws0675	C11H15N2O8P	β-Nicotinamide mononucleotide	Nucleotides and derivatives	Nucleotides and derivatives	1094-61-7	B	647470	234920	559410	82102	122180	83320	1.35946	0.199474	-2.32573	down
pmb0776	C20H20N2O3	N-Feruloyltryptamine	Alkaloids	Phenolamine	53905-13-8	A	56322	47291	47998	7493.9	9571.3	20198	1.38238	0.245782	-2.02455	down
pmb0382	C19H14O6	O-Feruloyl 4-hydroxycoumarin	Lignans and Coumarins	Coumarins	-	B	9	39462	45483	648200	758250	617760	1.05323	23.8271	4.57453	up
pme3311	C6H14O12P2	D-Fructose-1,6-biphosphate	Others	Saccharides and Alcohols	488-69-7	B	29127	15740	41332	33958	47510	25859	0.528247	1.24511	0.31627	insig
Zmyn000083	C6H14O12P2	D-Glucose 1,6-bisphosphate	Others	Saccharides and Alcohols	10139-18-1	B	31224	6900.6	41407	22279	31856	24009	0.245053	0.982553	-0.0253931	insig
mws1015	C15H16O9	Esculin (6,7-DihydroxyCoumarin-6-glucoside)	Lignans and Coumarins	Coumarins	531-75-9	A	476010	947670	883500	839310	827350	942320	0.531176	1.13081	0.177355	insig
Zmhn001793	C15H18O9	6-O-Caffeoyl-D-glucose	Phenolic acids	Phenolic acids	-	B	12709000	16450000	17630000	11149000	8577600	8362700	1.27493	0.60034	-0.736149	insig
mws1080	C12H22O11	Galactinol	Others	Saccharides and Alcohols	3687-64-7	A	406000	548720	653240	2051400	1687900	1419300	1.42368	3.20816	1.68175	up
Lmsn000381	C12H22O11	D-Maltose*	Others	Saccharides and Alcohols	133-99-3	A	223400	507550	244020	1538900	1003100	845450	1.34578	3.47441	1.79677	up
mws5038	C12H22O11	Isomaltulose*	Others	Saccharides and Alcohols	13718-94-0	A	255490	743660	425080	1486000	1135300	1025800	1.26458	2.56075	1.35657	up
mws0264	C12H22O11	D-Trehalose*	Others	Saccharides and Alcohols	99-20-7	A	165000	279740	305270	799300	426500	453160	1.23939	2.23858	1.16259	up
pme0519	C12H22O11	D-Sucrose*	Others	Saccharides and Alcohols	57-50-1	A	182650	244490	262910	895510	835780	808190	1.45595	3.68014	1.87976	up
mws0906	C16H22O8	Coniferin	Phenolic acids	Phenolic acids	531-29-3	B	18141000	22970000	26433000	14384000	11871000	11802000	1.32481	0.56344	-0.827666	insig
pmb2211	C19H38N2O3	Cocamidopropyl betaine	Alkaloids	Alkaloids	4292-10-8	A	21381	36508	17619	23104	23151	47341	0.431464	1.23955	0.309817	insig
HJAP050	C19H21NO5	N-Feruloyl-3-methoxytyramine	Alkaloids	Phenolamine	78510-19-7	A	97658	263840	142890	48173	257890	313710	0.0146454	1.22876	0.297206	insig
Lmmn000774	C15H20O9	Dihydrocaffeoylglucose	Phenolic acids	Phenolic acids	-	B	78271	22541	40069	140110	37965	32314	0.383732	1.49338	0.578582	insig
mws0609	C10H12N5O7P	Guanosine 3',5'-cyclic monophosphate	Nucleotides and derivatives	Nucleotides and derivatives	7665-99-8	A	178240	60133	136130	82073	56278	109240	0.649601	0.661119	-0.597018	insig
pmb0801	C14H19NO9	4-Pyridoxic acid-O-glucoside	Others	Vitamin	-	A	26244	25465	39220	69396	64937	77846	1.38812	2.33346	1.22247	up
Lmtn000940	C14H18O10	1-O-(3,4-Dihydroxy-5-methoxy-benzoyl)-glucoside	Phenolic acids	Phenolic acids	-	B	35947	49272	36500	14749	16861	16763	1.42884	0.397415	-1.33128	down
pmb0981	C10H14N5O7P	Adenosine 5'-monophosphate	Nucleotides and derivatives	Nucleotides and derivatives	61-19-8	A	3634800	2777600	7036000	3479700	6607700	6831900	0.476714	1.25809	0.331235	insig
mws0874	C10H14N5O7P	3'-Adenylic Acid	Nucleotides and derivatives	Nucleotides and derivatives	84-21-9	A	44734	23557	42691	17761	19619	21434	1.22249	0.529942	-0.916094	insig
pmb1562	C21H34O4	1-Stearidonoyl-Glycerol	Lipids	Glycerol ester	-	B	10262	5019.8	4864.3	7114.1	2803.9	4021.2	0.664348	0.691906	-0.531353	insig
pmb0770	C20H20N2O4	N-Feruloylserotonin	Alkaloids	Phenolamine	68573-23-9	B	9	9	9	9	139370	9	0.642756	5162.52	12.3339	insig
Lmhp011562	C21H36O4	1-α-Linolenoyl-glycerol	Lipids	Glycerol ester	-	A	8559000	3461900	6817300	2416100	2298400	2420100	1.27571	0.37873	-1.40076	down
Lmhp011388	C21H36O4	2-α-Linolenoyl-glycerol	Lipids	Glycerol ester	55268-58-1	A	4427800	1629000	3439900	705430	958390	852200	1.33578	0.264936	-1.91628	down
mws0178	C16H18O9	Chlorogenic acid (3-O-Caffeoylquinic acid)*	Phenolic acids	Phenolic acids	327-97-9	A	154510	23395	17021	11983	20895	256090	0.0392354	1.48245	0.567983	insig
mws2108	C16H18O9	Cryptochlorogenic acid (4-O-Caffeoylquinic acid)	Phenolic acids	Phenolic acids	905-99-7	B	129890	13742	11056	8550.2	7966.1	177760	0.13515	1.25592	0.328749	insig
mws1077	C16H18O9	Scopoletin-7-O-glucoside (Scopolin)	Lignans and Coumarins	Coumarins	531-44-2	A	33615	33283	23474	24587	32794	36514	0.129793	1.03898	0.0551725	insig
pme1816	C16H18O9	Neochlorogenic acid (5-O-Caffeoylquinic acid)*	Phenolic acids	Phenolic acids	906-33-2	A	149660	22966	18018	5802.1	18573	272440	0.189928	1.55691	0.638683	insig
Lmhp012042	C21H38O4	2-Linoleoylglycerol	Lipids	Glycerol ester	3443-82-1	A	770930	408700	584680	301470	294710	209640	1.28091	0.456734	-1.13057	down
Lmhp112042	C21H38O4	1-Linoleoylglycerol	Lipids	Glycerol ester	2277-28-3	A	854620	424300	579230	304130	285780	224120	1.28761	0.438086	-1.19071	down
Zmhn002422	C16H20O9	1-O-Feruloyl-D-Glucose	Phenolic acids	Phenolic acids	-	A	27040000	25892000	23749000	13710000	9832300	7769900	1.36455	0.408344	-1.29214	down
Hmmn002544	C16H20O9	Ferulic acid-4-O-glucoside	Phenolic acids	Phenolic acids	117405-51-3	A	928760	1189800	1056000	88539	177220	88946	1.44081	0.111734	-3.16187	down
Zmhn002334	C16H20O9	6-O-Feruloyl-D-glucose	Phenolic acids	Phenolic acids	137887-25-3	B	4406600	5492900	5283100	630400	1021800	606170	1.44733	0.148747	-2.74907	down
pmb0296	C21H40O4	1-Oleoyl-Sn-Glycerol	Lipids	Glycerol ester	129784-87-8	A	504820	224030	452970	353840	297520	334700	0.36542	0.834357	-0.261263	insig
pmb3107	C15H20O10	Glucosyringic Acid	Phenolic acids	Phenolic acids	-	B	25958	49528	35413	44077	96691	137440	1.07048	2.50866	1.32692	up
pmb0998	C10H14N5O8P	Guanosine 5'-monophosphate	Nucleotides and derivatives	Nucleotides and derivatives	85-32-5	A	533200	106960	373760	128080	92439	117610	1.01126	0.333487	-1.5843	down
mws5040	C12H21O11Na	Turanose	Others	Saccharides and Alcohols	547-25-1	B	131310	330720	195980	603550	609790	547740	1.32658	2.67637	1.42028	up
pmb0964	C16H23N5O5	Isopentenyladenine-7-N-glucoside	Nucleotides and derivatives	Nucleotides and derivatives	-	B	10033	19949	17789	21299	35908	25597	1.08381	1.73335	0.793565	insig
Lmgp003270	C16H16O10	Scopoletin-7-O-glucuronide	Lignans and Coumarins	Coumarins	132752-65-9	B	52796	42740	44711	144150	107590	46467	1.04203	2.1263	1.08834	up
pma3724	C17H20O9	1-O-Feruloylquinic acid	Phenolic acids	Phenolic acids	-	B	87917	64612	91646	196760	197180	95959	1.16069	2.00634	1.00457	up
pmb0752	C17H20O9	3-O-Feruloylquinic acid	Phenolic acids	Phenolic acids	1899-29-2	B	62625	88003	78115	316590	280160	113730	1.2642	3.10602	1.63507	up
Lmbp002309	C17H22O9	Sinapaldehyde-4-O-Glucoside	Phenolic acids	Phenolic acids	154461-65-1	B	19830	13561	6445.5	73176	536500	385590	1.31569	24.9838	4.64292	up
pmn001695	C16H20O10	Trihydroxycinnamoylquinic acid	Phenolic acids	Phenolic acids	-	B	44838	42162	33975	224190	206940	172860	1.46167	4.99268	2.31982	up
mws0011	C17H24O9	Syringin	Phenolic acids	Phenolic acids	118-34-3	B	39764	29988	12950	572180	1009800	549230	1.43033	25.7698	4.68761	up
mws0232	C17H20N4O6	Riboflavin (Vitamin B2)	Others	Vitamin	83-88-5	A	913400	1189800	757010	1891300	1243400	923350	0.856042	1.41879	0.504666	insig
pme3337	C14H17N5O8	Succinyladenosine	Nucleotides and derivatives	Nucleotides and derivatives	4542-23-8	A	1076200	841200	745700	1123400	900830	799690	0.319929	1.06039	0.0845926	insig
pme1286	C14H20N6O5S	S-(5'-Adenosy)-L-homocysteine	Amino acids and derivatives	Amino acids and derivatives	979-92-0	A	350110	333120	364550	524890	388990	334890	0.789151	1.19182	0.253172	insig
Zmhn002227	C17H22O10	4-O-Glucosyl-sinapate	Phenolic acids	Phenolic acids	-	B	5372.6	11401	3562.7	25065	16832	18826	1.28016	2.98594	1.57819	up
pmb2940	C17H22O10	1-O-Glucosyl sinapate	Phenolic acids	Phenolic acids	78185-48-5	B	849110	1484500	1071800	548790	569730	287440	1.23366	0.412861	-1.27627	down
HJN003	C17H22O10	1-O-Sinapoyl-D-glucose	Phenolic acids	Phenolic acids	-	B	309000	445720	282110	423090	223530	283620	0.327312	0.897196	-0.156504	insig
Lmmp010562	C24H38O4	Diisooctyl Phthalate	Phenolic acids	Phenolic acids	27554-26-3	B	895380	271360	473590	364660	384350	543580	0.313002	0.788006	-0.343721	insig
pme2735	C15H22N6O5S	S-Adenosyl-L-methionine	Amino acids and derivatives	Amino acids and derivatives	29908-03-0	B	1690800	1677500	1856600	1297400	1503900	1229700	1.30733	0.771498	-0.374266	insig
Cmjn004337	C18H26O10	Benzyl-(2''-O-xylosyl)glucoside	Phenolic acids	Phenolic acids	-	B	26861	48696	41411	10779	37167	49470	0.506715	0.832843	-0.263883	insig
pme3007	C9H14N2O12P2	Uridine 5'-diphosphate	Nucleotides and derivatives	Nucleotides and derivatives	27821-45-0	A	111270	37683	121570	39138	52919	50567	0.859607	0.527216	-0.923534	insig
pmd0152	C19H39O7P	LysoPA 16:0 (2n isomer)	Lipids	Glycerol ester	-	B	12927	9	8102.9	9	5328.6	8498.1	0.121955	0.657625	-0.604664	insig
pmd0153	C19H39O7P	LysoPA 16:0	Lipids	Glycerol ester	22002-85-3	B	21852	9	12310	9	10699	9363	0.128268	0.587369	-0.76766	insig
Lmbp003668	C20H18O10	Kaempferol-3-O-arabinoside	Flavonoids	Flavonoid	-	B	2570200	1208600	1439700	692780	94605	37916	1.1737	0.158149	-2.66064	down
pmn001663	C22H26O8	Syringaresinol	Lignans and Coumarins	Lignans	21453-69-0	B	1810	3003.3	2468.5	1694.7	3015.4	1459.8	0.498391	0.847304	-0.239048	insig
mws2523	C12H23O14P	Trehalose 6-phosphate	Others	Saccharides and Alcohols	4484-88-2	B	5412.2	4685.9	12963	13200	6757.6	3554.1	0.0176342	1.01954	0.0279175	insig
Lmhp008337	C19H40NO7P	LysoPE 14:0(2n isomer)	Lipids	LPE	-	B	32267	13159	21920	13991	7032.8	11636	1.07173	0.484955	-1.04408	down
pmb0864	C19H40NO7P	LysoPE 14:0	Lipids	LPE	-	B	153900	49416	89175	52061	32793	38607	1.09408	0.422102	-1.24434	down
pmp000436	C30H50O	Taraxerol	Terpenoids	Triterpene	127-22-0	B	800.2	9	9	9	9	9	0.680712	0.0329993	-4.92142	insig
pme2117	C10H15N5O10P2	Adenosine 5'-diphosphate	Nucleotides and derivatives	Nucleotides and derivatives	58-64-0	A	402390	218120	468650	198450	231740	234290	1.03002	0.610085	-0.712918	insig
mws0919	C21H20O10	Kaempferol-3-O-rhamnoside (Afzelin)	Flavonoids	Flavonols	482-39-3	A	77962	39973	45821	4006.2	9	9	1.22683	0.0245744	-5.3467	down
pme0321	C21H20O10	Kaempferol-7-O-rhamnoside	Flavonoids	Flavonols	20196-89-8	B	22741	17810	16309	8519.7	3028.2	3740.8	1.31435	0.268883	-1.89495	down
Lmtn002324	C19H28O11	Benzyl-(2''-O-glucosyl)glucoside	Phenolic acids	Phenolic acids	-	B	18717	20124	21729	37096	23464	27686	1.18942	1.45693	0.542927	insig
mws2186	C20H18O11	Avicularin(Quercetin-3-O-α-L-arabinofuranoside)	Flavonoids	Flavonols	572-30-5	A	2845600	1712200	1764000	2021500	618300	221300	0.931053	0.452577	-1.14377	insig
Lmdp003509	C20H18O11	Quercetin-3-O-xyloside (Reynoutrin)	Flavonoids	Flavonols	549-32-6	B	4106100	683850	2592100	2526500	762260	364820	0.642192	0.494928	-1.01471	insig
HJN087	C21H22O10	Naringenin-4'-O-glucoside	Flavonoids	Flavonoid	-	B	100740	66039	73940	49109	76497	54544	0.947109	0.748383	-0.418151	insig
mws1179	C21H22O10	Naringenin-7-O-glucoside (Prunin)	Flavonoids	Dihydroflavone	529-55-5	B	23663	22159	13517	34387	13549	13157	0.0512224	1.02956	0.0420265	insig
HJN055	C21H24O10	Dihydrocharcone-4'-O-glucoside	Flavonoids	Chalcones	-	A	409070	549750	435850	835680	752530	726970	1.39142	1.66002	0.731201	insig
mws2118	C21H24O10	Phloretin-2'-O-glucoside (Phlorizin)	Flavonoids	Chalcones	60-81-1	A	230170	266730	202950	446860	392430	387830	1.41465	1.7534	0.810159	insig
Lmhp008440	C20H40NO7P	LysoPE 15:1	Lipids	LPE	-	A	7375.1	3975.4	5244.7	9	9	9	1.47151	0.00162698	-9.26359	down
Lmhp008273	C20H40NO7P	LysoPE 15:1(2n isomer)	Lipids	LPE	-	B	2526.3	721.77	2042.6	365.38	429.11	586.32	1.24946	0.26099	-1.93794	down
Lmlp003024	C20H30O7N4	N'-p-Coumaroylagmatine-glucoside	Alkaloids	Phenolamine	-	B	45240	53168	55959	15073	9	9	1.11437	0.0977605	-3.3546	down
Lmhp009187	C20H42NO7P	LysoPE 15:0	Lipids	LPE	-	A	85275	28327	46863	30841	19192	22352	1.0615	0.451095	-1.1485	down
Lmhp008885	C20H42NO7P	LysoPE 15:0(2n isomer)	Lipids	LPE	-	A	17351	7332.1	11009	6943.2	4935.5	7531.4	1.06016	0.543821	-0.878797	insig
pme1014	C31H40O2	Menatetrenone (Vitamin K2)	Others	Vitamin	11032-49-8	B	55962	55724	47735	47736	65311	45684	0.0965347	0.995672	-0.00625777	insig
Lmhp007836	C21H38NO7P	LysoPE 16:3	Lipids	LPE	-	A	61512	39912	58377	30246	18767	21024	1.32092	0.438276	-1.19009	down
Hmcp002316	C21H20O11	Isorhamnetin-3-O-arabinoside	Flavonoids	Flavonols	-	A	8535900	6706200	5327000	853170	1160600	612720	1.43695	0.127691	-2.96927	down
mws2209	C21H20O11	Kaempferol-3-O-glucoside (Astragalin)	Flavonoids	Flavonols	480-10-4	B	4500500	3289500	4924000	3370800	618780	383330	1.06565	0.343944	-1.53975	down
Xmyp005654	C21H20O11	Kaempferol-4'-O-glucoside	Flavonoids	Flavonoid	-	A	760110	658390	708080	5295700	970490	654620	0.787759	3.25443	1.70241	insig
mws0045	C21H20O11	Quercetin-3-O-rhamnoside(Quercitrin)	Flavonoids	Flavonols	522-12-3	B	383920	235480	303030	21135	9	9	1.19896	0.0229318	-5.44651	down
Hmpp003270	C21H20O11	Luteolin-4'-O-glucoside	Flavonoids	Flavonoid	6920-38-3	A	6033700	5304400	5030700	894970	461650	404310	1.42716	0.107578	-3.21654	down
mws0913	C21H20O11	Kaempferol-3-O-galactoside (Trifolin)	Flavonoids	Flavonols	23627-87-4	B	120950	93007	77013	191690	125880	124680	1.09798	1.51992	0.603992	insig
Lmlp003531	C21H20O11	Luteolin-3'-O-glucoside	Flavonoids	Flavonoid	5154-41-6	A	7573800	5130000	5543200	956150	424090	429110	1.41974	0.0991588	-3.33412	down
pme2459	C21H20O11	Luteolin-7-O-glucoside (Cynaroside)	Flavonoids	Flavonoid	5373-11-5	A	165020	195660	163810	2672200	1186400	374480	1.27094	8.07085	3.01272	up
HJN086	C21H22O11	Eriodictyol-3'-O-glucoside	Flavonoids	Dihydroflavone	-	B	17047	22312	27933	17200	9350.3	5731.6	1.08346	0.479729	-1.05971	down
Lmtn002796	C21H22O11	Aromadendrin-7-O-glucoside	Flavonoids	Flavonoid	28189-90-4	B	136850	150210	157000	137710	101510	136660	0.905981	0.846462	-0.240482	insig
mws0057	C21H22O11	Eriodictyol-7-O-glucoside	Flavonoids	Dihydroflavone	38965-51-4	B	5849	3157	6190.5	44423	33295	18893	1.39101	6.35745	2.66845	up
Lmmn004625	C21H22O11	Dihydrokaempferol-7-O-glucoside	Flavonoids	Flavonols	-	B	16829	7608.8	7224.8	3574.6	2537	901.55	1.23262	0.221496	-2.17465	down
Lmhp008763	C21H42NO7P	LysoPE 16:1(2n isomer)	Lipids	LPE	-	A	108420	44549	77698	26028	17459	16262	1.3398	0.259027	-1.94883	down
Lmhp009034	C21H42NO7P	LysoPE 16:1	Lipids	LPE	-	A	212310	92850	148120	90248	44510	62989	1.16325	0.436258	-1.19675	down
HJN041	C21H24O11	Epicatechin glucoside	Flavonoids	Flavanols	-	B	13388	15035	10137	8182.3	8371.9	4076.3	1.12938	0.535023	-0.902326	insig
pmd0160	C21H44NO7P	LysoPE 16:0(2n isomer)	Lipids	LPE	-	A	3505600	1047700	1790400	1183100	716340	1014800	0.992031	0.459391	-1.1222	insig
pmb0876	C21H44NO7P	LysoPE 16:0	Lipids	LPE	53862-35-4	A	16050000	4390200	7858300	4087900	2966800	4007200	1.07894	0.390901	-1.35513	down
Lmhp005872	C25H30N2O6	Diferuloylcadaverine	Alkaloids	Phenolamine	-	B	42576	46026	34806	9	9	7312	1.21446	0.0593965	-4.07348	down
mws4053	C30H48O3	Ursolic acid	Terpenoids	Triterpene	77-52-1	B	5801.8	7652	9357.8	8129.3	9260.4	9070.6	0.732697	1.15995	0.214062	insig
pmb2654	C19H27NO12	Anthranilate-1-O-Sophoroside	Phenolic acids	Phenolic acids	-	B	50562	101730	79732	312490	156680	174700	1.29957	2.77501	1.4725	up
Lmzn001894	C21H18O12	Kaempferol-3-O-glucuronide	Flavonoids	Flavonols	22688-78-4	A	941510	896300	837320	2012400	914080	803490	0.625619	1.39431	0.479555	insig
mws4167	C21H18O12	Luteolin-7-O-glucuronide	Flavonoids	Flavonoid	29741-10-4	A	3330800	2653000	2945900	5438900	2935200	3433700	0.817279	1.32231	0.403057	insig
Lmmp003767	C21H18O12	Kaempferol-7-O-glucuronide	Flavonoids	Flavonols	-	B	407370	431510	736080	14959000	12948000	10739000	1.46261	24.5378	4.61693	up
Hmcp002539	C22H22O11	Isorhamnetin-3-O-rhamnoside	Flavonoids	Flavonols	-	B	2863200	2458000	1866900	20175	42577	12070	1.45206	0.0104091	-6.586	down
pmp000579	C22H22O11	Diosmetin-7-O-galactoside	Flavonoids	Flavonoid	-	A	496720	496910	487800	479000	295530	206870	0.985493	0.662468	-0.594077	insig
mws1329	C21H20O12	Quercetin-7-O-glucoside*	Flavonoids	Flavonols	491-50-9	A	404890	522730	367450	1697700	726790	656380	1.17768	2.37892	1.25031	up
mws0091	C21H20O12	Quercetin-3-O-glucoside (Isoquercitrin)*	Flavonoids	Flavonols	482-35-9	A	787620	909670	647090	3077700	1189600	1273900	1.165	2.36361	1.24099	up
mws0061	C21H20O12	Quercetin-3-O-galactoside (Hyperin)	Flavonoids	Flavonols	482-36-0	A	914220	1417200	987530	4843700	1841500	1941000	1.19426	2.59908	1.378	up
Lmdp003286	C21H20O12	Isohyperoside	Flavonoids	Flavonols	35589-21-0	A	6392800	6172000	5505500	26260000	9475900	6042700	0.917624	2.312	1.20914	insig
Lmzp002365	C22H24O11	Hesperetin-7-O-glucoside	Flavonoids	Flavonoid	31712-49-9	B	5949700	3315500	9	974360	1316300	904850	0.468766	0.344893	-1.53578	insig
pme1598	C22H24O11	Hesperetin-5-O-glucoside	Flavonoids	Dihydroflavonol	69651-80-5	B	616920	870620	623480	2741000	1382900	764750	1.04701	2.31578	1.2115	up
Lmhp009464	C22H44NO7P	LysoPE 17:1(2n isomer)	Lipids	LPE	-	A	43941	15266	23619	12037	7139.4	13432	1.14461	0.393698	-1.34484	down
Lmhp009769	C22H44NO7P	LysoPE 17:1	Lipids	LPE	-	A	47945	14824	26116	13564	9323.7	9538.3	1.16176	0.364808	-1.45479	down
Xmsn002700	C21H22O12	Taxifolin-3'-O-glucoside	Flavonoids	Flavonoid	31106-05-5	B	20852	24506	19189	67881	24052	22782	0.81865	1.77723	0.829632	insig
pmd0130	C22H46NO7P	LysoPC 14:0	Lipids	LPC	20559-16-4	A	61124	35672	62456	26570	22111	23150	1.32296	0.451052	-1.14863	down
Zmhn002508	C21H28O12	4-p-Cumaroyl-rhamnosyl-(1→6)-D-glucose	Phenolic acids	Phenolic acids	-	B	14034	15857	16776	39750	52453	3731.1	0.245259	2.05572	1.03964	insig
Lmsn012425	C30H48O4	Rubusic acid (3β,7α-Dihydroxyolean-12-en-28-oic acid)	Terpenoids	Triterpene	23984-26-1	A	37399	7100.7	15334	6065.3	3017.9	6308.9	1.10613	0.257248	-1.95877	down
pmb1912	C20H23N7O7	10-Formyltetrahydrofuran	Alkaloids	Alkaloids	2800-34-2	B	78765	54719	61637	145890	68623	70526	0.794107	1.46083	0.54679	insig
Lmhp008233	C23H40NO7P	LysoPE 18:4	Lipids	LPE	-	A	4835.5	3196.9	5840.6	2165	1968.9	1065.3	1.26924	0.374771	-1.41592	down
Lmhp008589	C23H42NO7P	LysoPE 18:3(2n isomer)	Lipids	LPE	-	A	7425400	3322300	5570900	2149500	2227600	1583400	1.30403	0.365258	-1.45301	down
Lmhp008801	C23H42NO7P	LysoPE 18:3	Lipids	LPE	-	A	4297000	2136300	3382400	1969600	1459600	1497700	1.21615	0.501941	-0.994411	insig
pmp000583	C22H20O12	Diosmetin-7-O-glucuronide	Flavonoids	Flavonoid	35110-20-4	B	906060	610900	671160	972510	736570	309280	0.305776	0.922417	-0.116508	insig
pmb0874	C23H44NO7P	LysoPE 18:2(2n isomer)	Lipids	LPE	-	A	30136000	13909000	23153000	9423600	8147300	6237100	1.31192	0.354296	-1.49697	down
pmb0881	C23H44NO7P	LysoPE 18:2	Lipids	LPE	-	A	14127000	6364300	10698000	5363600	3760400	3928800	1.25239	0.418502	-1.25669	down
Lmmp003783	C21H18O13	Quercetin-3-O-glucuronide	Flavonoids	Flavonols	22688-79-5	B	9	9	9	4756500	4697400	3512000	1.47252	480219	18.8733	up
Lmfn003760	C21H18O13	Quercetin-4′-O-glucuronide	Flavonoids	Flavonols	201463-36-7	A	3884200	3819400	3277000	3594500	2719900	1860300	0.899974	0.744468	-0.425719	insig
Hmjp003123	C21H18O13	Quercetin-5-O-glucuronide	Flavonoids	Flavonols	-	B	11934000	10114000	9314300	11353000	8410600	3516100	0.684559	0.742283	-0.429959	insig
Zmhn004909	C21H18O13	3,4-Digalloylshikimic acid	Phenolic acids	Phenolic acids	-	B	91751	133920	109720	115870	102740	71348	0.522866	0.864537	-0.21	insig
Lmjp003044	C22H22O12	Isorhamnetin-3-O-Glucoside*	Flavonoids	Flavonols	5041-82-7	A	12148000	12687000	10450000	8450200	10174000	6486600	1.13197	0.711657	-0.490747	insig
Hmcp002207	C22H22O12	Isorhamnetin-7-O-glucoside (Brassicin)*	Flavonoids	Flavonols	6743-96-0	A	11732000	12408000	9892200	8509400	9651600	6467100	1.12255	0.723671	-0.466595	insig
Lmnn002886	C23H26O11	1'-O-(3,4-Dihydroxyphenethyl)-O-caffeoyl-glucoside	Phenolic acids	Phenolic acids	-	B	27182000	30744000	26740000	30632000	21474000	15856000	0.7542	0.802707	-0.317054	insig
pmb2260	C23H46NO7P	LysoPC 15:1	Lipids	LPC	-	A	16793	10701	17762	3394.7	4895.8	5289.1	1.40715	0.300062	-1.73667	down
mws0289	C23H46NO7P	LysoPE 18:1	Lipids	LPE	89576-29-4	A	3305500	1050700	2073400	1285400	951080	1368600	0.859839	0.560701	-0.834698	insig
pmb0856	C23H46NO7P	LysoPE 18:1(2n isomer)	Lipids	LPE	-	A	4719700	1315800	2932800	1106000	1105600	1221700	1.11804	0.382826	-1.38524	down
pmb0883	C23H48NO7P	LysoPE 18:0	Lipids	LPE	69747-55-3	A	143080	30120	61795	19017	14395	21194	1.20669	0.232371	-2.1055	down
pmb2319	C23H48NO7P	LysoPC 15:0	Lipids	LPC	108273-89-8	A	119010	66030	100940	68795	49410	58745	1.11596	0.61875	-0.692572	insig
pmb0880	C23H48NO7P	LysoPE 18:0(2n isomer)	Lipids	LPE	-	A	42076	13065	27875	16283	13827	17208	0.832953	0.569987	-0.811	insig
Lmhp009129	C23H48NO7P	LysoPC 15:0(2n isomer)	Lipids	LPC	-	A	40128	18087	33338	18417	10627	11493	1.17604	0.442771	-1.17537	down
pmb3072	C22H26O12	3-O-p-Coumaroylshikimic acid-O-glucoside	Phenolic acids	Phenolic acids	-	B	31397	52493	40082	11993	6566	16258	1.32935	0.280846	-1.83215	down
Hmyn007168	C22H45O9P	LysoPG 16:0	Lipids	Glycerol ester	-	B	9466900	3899600	5776300	2799600	3210600	2326100	1.21627	0.43548	-1.19932	down
pmn001707	C30H46O5	Quillaic acid	Phenolic acids	Phenolic acids	631-01-6	B	826390	548570	1282000	1129600	832320	1307800	0.587661	1.23062	0.299391	insig
Lmsp005625	C22H18O13	3-O-Methylellagic acid-4'-O-(5''-O-acetyl)arabinoside	Tannins	Tannin	-	B	9421.3	4583.1	7060.4	9	3511.5	9	1.12729	0.167554	-2.5773	down
Lmmn003398	C23H22O12	Kaempferol-3-O-(6''-acetyl)glucoside	Flavonoids	Flavonols	-	B	28884	23182	22602	50225	3865.8	12380	0.522698	0.890218	-0.167769	insig
pma1303	C24H46NO7P	LysoPC 16:2	Lipids	LPC	-	A	98441	63986	97930	84746	60417	68462	0.699344	0.820508	-0.285411	insig
pmb0863	C24H46NO7P	LysoPC 16:2(2n isomer)	Lipids	LPC	-	A	59912	39258	69082	27864	26357	22100	1.33042	0.453611	-1.14047	down
pmp001270	C24H48NO7P	LysoPC 16:1	Lipids	LPC	76790-27-7	A	423740	265420	419930	274730	185530	195680	1.16479	0.591422	-0.757741	insig
Lmhp008833	C24H48NO7P	LysoPC 16:1(2n isomer)	Lipids	LPC	-	A	592720	296810	570540	167640	156660	120370	1.35699	0.304554	-1.71523	down
HJN054	C25H34O10	Secoisolariciresinol-9'-O-xyloside	Lignans and Coumarins	Lignans	-	B	81818	66690	70693	130310	79304	169590	1.07968	1.72994	0.79072	insig
pmb0855	C24H50NO7P	LysoPC 16:0	Lipids	LPC	17364-16-8	A	28877000	14161000	23287000	12009000	11142000	13401000	1.18023	0.551104	-0.859602	insig
pmd0132	C24H50NO7P	LysoPC 16:0(2n isomer)	Lipids	LPC	-	A	5636200	2519800	4412700	2248900	1956300	2481500	1.14075	0.532012	-0.910469	insig
Lmhp010040	C25H46NO7P	LysoPE 20:3	Lipids	LPE	-	A	28262	10231	20161	10110	6415.3	7044.1	1.16686	0.401838	-1.31531	down
Lmhp009802	C25H46NO7P	LysoPE 20:3(2n isomer)	Lipids	LPE	-	A	30086	8535.2	20189	10023	7244	8157.8	1.02285	0.43232	-1.20983	down
HJAP135	C24H24O12	Pinocembrin-7-O-(6''-O-malonyl)glucoside	Flavonoids	Flavonoid	-	A	2765800	3019500	2938100	1848000	582400	426060	1.18915	0.327448	-1.61066	down
Lmsn009589	C30H48O6	2α,3β,19α,23-Tetrahydroxyurs-12-en-28-oic acid	Terpenoids	Triterpene	-	B	9	9	9	3662.4	1979.9	1258.9	1.46874	255.6	7.99774	up
Lmhp010514	C25H48NO7P	LysoPE 20:2(2n isomer)	Lipids	LPE	-	A	28310	10293	16349	6686.2	5039.3	5517.5	1.291	0.313783	-1.67216	down
Lmhp008718	C25H48NO7P	LysoPC 17:2	Lipids	LPC	-	A	69809	27594	60204	18258	15106	12297	1.30674	0.289714	-1.7873	down
Lmhp010757	C25H48NO7P	LysoPE 20:2	Lipids	LPE	-	A	74464	18250	42091	18471	10828	13181	1.12836	0.315122	-1.66602	down
Hmln002199	C23H22O13	Quercetin-3-O-(6''-acetyl)galactoside	Flavonoids	Flavonols	-	B	29197	29987	26805	67592	7041.6	14771	0.378883	1.03972	0.0561969	insig
Lmhp009590	C25H50NO7P	LysoPC 17:1	Lipids	LPC	-	A	53081	18139	49191	27309	24675	28807	0.603449	0.67096	-0.575701	insig
Lmhp010515	C25H52NO7P	LysoPC 17:0(2n isomer)	Lipids	LPC	-	A	42017	23264	35142	20504	14252	16156	1.25214	0.506975	-0.980012	insig
pmb2406	C25H52NO7P	LysoPC 17:0	Lipids	LPC	50930-23-9	A	22643	21301	19214	12618	12069	14737	1.40753	0.624212	-0.679891	insig
Lmhp009526	C27H46O9	2-α-Linolenoyl-glycerol-1-O-glucoside	Lipids	Glycerol ester	-	A	80810	71775	106340	86933	96026	121070	0.665441	1.1742	0.231675	insig
Lmhp009773	C27H46O9	1-α-Linolenoyl-glycerol-3-O-glucoside	Lipids	Glycerol ester	-	A	186970	100590	190430	153020	137360	199750	0.12798	1.0254	0.036184	insig
Hmqp006235	C26H46NO7P	LysoPC 18:4	Lipids	LPC	-	A	26945	13562	24537	8564.7	10964	6322.4	1.27497	0.39744	-1.33119	down
Zmhn000785	C19H32O16	Di-O-Glucosylquinic acid	Phenolic acids	Phenolic acids	-	A	71300	124420	76038	215290	156950	146840	1.27121	1.91008	0.933634	insig
Lmhp010334	C27H48O9	2-Linoleoylglycerol-1-O-glucoside	Lipids	Glycerol ester	-	A	4686.8	1063.5	4239.7	2769.2	4591.8	2642.2	0.189204	1.00132	0.00190501	insig
Lmhp010573	C27H48O9	1-Linoleoylglycerol-3-O-glucoside	Lipids	Glycerol ester	-	A	6466.7	2140.1	5065.6	4046.3	4262	6658.2	0.275449	1.09465	0.13047	insig
pmb0865	C26H48NO7P	LysoPC 18:3(2n isomer)	Lipids	LPC	-	A	15047000	10215000	16865000	10911000	8697800	9229100	1.08537	0.684547	-0.546779	insig
pmb0854	C26H48NO7P	LysoPC 18:3	Lipids	LPC	-	A	14216000	9773900	15629000	10481000	8289500	9548400	1.05124	0.714783	-0.484424	insig
Hmbn002692	C22H30O14	6'-O-Feruloyl-D-sucrose	Phenolic acids	Phenolic acids	118230-77-6	B	690060	514070	568010	625970	367580	159060	0.806972	0.650406	-0.620588	insig
pmp001251	C26H50NO7P	LysoPC 18:2(2n isomer)	Lipids	LPC	-	A	3154300	1505700	2935800	1091200	977610	820480	1.2999	0.38038	-1.39449	down
pmp001273	C26H50NO7P	LysoPC 18:2	Lipids	LPC	-	A	1409100	876300	1382200	803270	612490	685610	1.24054	0.572955	-0.803506	insig
Li512111	C24H24O13	Isorhamnetin-3-O-(6''-acetylglucoside)	Flavonoids	Flavonols	-	B	55913	76793	64429	7755.1	4139.9	6345.6	1.44355	0.0925285	-3.43396	down
Lmhp010190	C26H52NO7P	LysoPC 18:1(2n isomer)	Lipids	LPC	-	A	45722000	16699000	39712000	14806000	16220000	16880000	1.09405	0.469055	-1.09217	down
pmp001281	C26H52NO7P	LysoPC 18:1	Lipids	LPC	-	A	16734000	7284800	16048000	9509800	7724300	10084000	0.75437	0.681814	-0.55255	insig
mws0126	C26H54NO7P	LysoPC 18:0	Lipids	LPC	19420-57-6	A	830230	321110	586550	241950	212180	246150	1.23807	0.402948	-1.31133	down
pmd0136	C26H54NO7P	LysoPC 18:0(2n isomer)	Lipids	LPC	-	A	151770	61631	114160	62064	38546	51026	1.13954	0.462924	-1.11115	down
Lmhp007840	C27H52NO7P	LysoPC 19:2	Lipids	LPC	-	A	44823	14032	29432	6357.8	5475.2	5163.9	1.35238	0.192519	-2.37693	down
Lmhp007598	C27H52NO7P	LysoPC 19:2(2n isomer)	Lipids	LPC	-	A	5566.7	5536.6	6649.5	10291	7592.3	6169.2	1.01438	1.35486	0.43814	insig
pmp000587	C24H22O14	Luteolin-7-O-(6''-malonyl)glucoside	Flavonoids	Flavonoid	-	A	9	2258.5	2261.3	4384.7	9	9	0.3594	0.972156	-0.0407403	insig
Lmdp004892	C24H22O14	Kaempferol-3-O-(6''-malonyl)galactoside	Flavonoids	Flavonols	-	A	390930	378880	407810	489890	68537	111390	0.869078	0.568789	-0.814035	insig
Lmhp010908	C27H54NO7P	LysoPC 19:1	Lipids	LPC	-	A	36585	7942	22575	7380.1	9475.5	8397.6	1.00077	0.37634	-1.40989	down
Zmfn000481	C14H22N2O16P2	Uridine-5'-Diphosphate-D-Xylose	Nucleotides and derivatives	Nucleotides and derivatives	3616-06-6	B	404230	326290	367780	223870	245840	139760	1.25089	0.554921	-0.849645	insig
pmb0824	C25H28O13	Syringic acid-4-O-(6''-feruloyl)glucoside	Phenolic acids	Phenolic acids	-	B	157590	163950	171920	20130	20155	12522	1.45216	0.107014	-3.22413	down
pmb2228	C27H56NO7P	LysoPC 19:0	Lipids	LPC	108273-88-7	A	3786.2	5280.8	3504.1	8222.1	3645.6	1736	0.0983781	1.08214	0.113888	insig
Lmdn001925	C26H34O12	Olivil-4'-O-glucoside	Lignans and Coumarins	Lignans	76880-93-8	B	72940	90950	62259	65810	55808	77408	0.573379	0.880066	-0.184317	insig
pmp001282	C28H50NO7P	Propyl 2-(trimethylammonio)ethyl phosphate	Others	Others	-	A	1607300	713450	1587900	890910	729420	910980	0.842646	0.647617	-0.626786	insig
Lmhp009890	C28H52NO7P	LysoPC 20:3	Lipids	LPC	1199257-41-4	A	73878	37643	60102	39797	31885	32795	1.09564	0.608759	-0.716058	insig
pmd0147	C28H54NO7P	LysoPC 20:2	Lipids	LPC	-	A	177510	84381	130850	83370	65773	69509	1.13953	0.556733	-0.844942	insig
pmd0146	C28H54NO7P	LysoPC 20:2(2n isomer)	Lipids	LPC	-	A	69907	29820	59599	28184	22489	21402	1.18751	0.452374	-1.14441	down
pmb0608	C25H24O14	Chrysoeriol-7-O-(6''-malonyl)glucoside	Flavonoids	Flavonoid	-	A	21429	18595	20719	67849	12990	15998	0.29712	1.59421	0.67284	insig
Lmhp011549	C28H56NO7P	LysoPC 20:1	Lipids	LPC	-	A	55967	20263	37285	11915	16675	23254	1.10166	0.456715	-1.13063	down
Hmln002189	C24H22O15	Quercetin-3-O-(6''-malonyl)galactoside	Flavonoids	Flavonols	-	A	50638	60414	43049	154400	19356	25417	0.149103	1.29248	0.370146	insig
mws1138	C24H26N2O13	Betanin (Betanidin-5-O-glucoside)	Alkaloids	Alkaloids	7659-95-2	B	61594	57765	66809	49413	17899	5337	1.01257	0.390234	-1.35759	down
Rfmb25702	C28H34O12	Pinoresinol-4-O-(6''-acetyl)glucoside	Lignans and Coumarins	Lignans	-	B	119570	147060	106580	15096	3268.3	5226.5	1.38996	0.0632105	-3.98369	down
HJAP064	C25H24O15	Isorhamnetin-3-O-(6''-malonylglucoside)	Flavonoids	Flavonoid	-	B	311220	291540	279590	119370	56628	63814	1.37626	0.271788	-1.87945	down
pmb2922	C15H24N2O17P2	Uridine 5'-diphospho-D-glucose	Nucleotides and derivatives	Nucleotides and derivatives	133-89-1	A	1442800	1631400	1603600	1237500	1648000	1267400	0.796332	0.887789	-0.171711	insig
Lmmp003306	C25H26O15	Quercetin-3-O-xylosyl(1→2)arabinoside	Flavonoids	Flavonols	-	A	1749400	1498700	1232900	1350600	1395700	1497800	0.330565	0.947132	-0.0783621	insig
Zmxp005470	C26H26O15	Tricin-7-O-(6''-O-malonyl)glucoside	Flavonoids	Flavonoid	-	B	9	9	9	30219	18939	40047	1.46978	3303.89	11.6899	up
mws0047	C27H30O14	Apigenin-7-O-neohesperidoside (Rhoifolin)	Flavonoids	Flavonoid	17306-46-6	B	60804	49385	54581	25498	39137	41737	1.22746	0.645579	-0.631335	insig
Lmnp002741	C27H30O14	Genkwanin-6-C-(2''-O-apiosyl)glucoside	Flavonoids	Flavonoid carbonoside	-	B	146400	175820	122470	9	9	9	1.47138	6.07165e-05	-14.0076	down
HJAP148	C26H28O15	Kaempferol-3-O-sambubioside	Flavonoids	Flavonoid	27661-51-4	A	734430	921880	965810	2856000	2148100	3888100	1.40218	3.39123	1.76181	up
pmb0492	C34H37N3O6	N',N'',N'''-p-Coumaroyl-cinnamoyl-caffeoyl spermidine	Alkaloids	Phenolamine	-	B	364580	102530	178570	178750	119780	61219	0.714168	0.557163	-0.843829	insig
Hmgp003641	C28H32O14	Chrysoeriol-6-C-rhamnoside-7-O-rhamnoside	Flavonoids	Flavonoid	-	B	36602	83414	70771	46335	65920	62663	0.103263	0.916823	-0.125284	insig
pmp001288	C28H32O14	Acacetin-7-O-rutinoside (Linarin)	Flavonoids	Flavonoid	480-36-4	A	1298300	2763700	2393800	1571300	2299800	2333700	0.0191516	0.96112	-0.0572112	insig
mws1290	C30H26O13	Kaempferol-3-O-(6''-p-Coumaroyl)glucoside (Tiliroside)	Flavonoids	Flavonols	20316-62-5	B	45738	60313	58841	61914	81648	75571	1.11416	1.32895	0.410285	insig
Hmjn004446	C30H26O13	Luteolin-7-O-(6''-caffeoyl)rhamnoside	Flavonoids	Flavonoid	-	B	500750	480690	465450	72288	39838	31910	1.43074	0.0995487	-3.32845	down
Lmsp004670	C27H30O15	Kaempferol-3-O-glucoside-7-O-rhamnoside	Flavonoids	Flavonols	-	A	317260	461780	539190	1109400	872920	1527200	1.33693	2.6623	1.41267	up
pmp001079	C27H30O15	Luteolin-7-O-neohesperidoside (Lonicerin)*	Flavonoids	Flavonoid	25694-72-8	A	9193.2	14448	3775.7	91677	37728	23096	1.25107	5.5623	2.47568	up
pmp000593	C27H30O15	Luteolin-7-O-rutinoside*	Flavonoids	Flavonoid	3563-98-2	A	81157	95822	112230	1127000	590300	345820	1.39504	7.13366	2.83464	up
Lmjp002867	C27H30O15	Kaempferol-3-O-neohesperidoside*	Flavonoids	Flavonols	32602-81-6	A	320770	486920	555020	1214700	873290	1701700	1.31792	2.781	1.4756	up
Lmsn002815	C27H30O15	Kaempferol-3-O-rutinoside(Nicotiflorin)*	Flavonoids	Flavonoid	17650-84-9	A	496360	739770	972130	1419100	1440300	3902500	1.16415	3.06209	1.61452	up
Zmcp003989	C27H30O15	Kaempferol-3-O-rhamnosyl(1→2)glucoside	Flavonoids	Flavonoid	-	A	8299.6	6830.3	1016.9	86174	50820	39328	1.30864	10.9199	3.44889	up
Lmjp002596	C26H28O16	Quercetin-3-O-sambubioside	Flavonoids	Flavonols	83048-35-5	A	752730	858200	868650	1277100	1691200	1562700	1.39294	1.82733	0.869734	insig
Lmtp004044	C26H28O16	Quercetin-3-O-apiosyl(1→2)galactoside	Flavonoids	Flavonols	-	B	22354000	18981000	21271000	36182000	38139000	36845000	1.44288	1.77564	0.828343	insig
Lmqn000780	C17H27N3O17P2	Uridine 5'-diphospho-N-acetylglucosamine	Alkaloids	Alkaloids	528-04-1	B	21566	21320	27935	26592	25489	16462	0.161509	0.967834	-0.0471679	insig
Hmjp003008	C27H28O16	Luteolin-7-O-glucuronide-5-O-rhamnoside	Flavonoids	Flavonoid	-	A	2691900	2259600	2063300	2260400	3708600	4167300	0.902811	1.44499	0.531057	insig
pmp001080	C28H32O15	Diosmetin-7-O-Neohesperidoside (Neodiosmin)	Flavonoids	Flavonoid	38665-01-9	B	195470	158750	149520	65406	64371	64426	1.45373	0.385522	-1.37511	down
Lmmp003091	C27H30O16	Quercetin-3-O-(4''-O-glucosyl)rhamnoside	Flavonoids	Flavonols	59262-54-3	B	218000	143840	127850	267810	140220	179840	0.506165	1.20049	0.263628	insig
Lmsp004166	C27H30O16	Quercetin-3-O-glucoside-7-O-rhamnoside	Flavonoids	Flavonols	-	B	2720200	2949600	2995700	2888000	3555200	3076800	0.799982	1.09861	0.135679	insig
mws0059	C27H30O16	Quercetin-3-O-rutinoside (Rutin)	Flavonoids	Flavonols	153-18-4	A	1241300	1333000	1219600	1539300	1365500	1443300	1.26227	1.14608	0.196703	insig
Lmbp002336	C27H30O16	Quercetin-3-O-(2''-O-rhamnosyl)galactoside	Flavonoids	Flavonols	-	B	3291700	4704700	4336900	8716800	9624600	9991800	1.42148	2.29729	1.19993	up
Lmjp002461	C27H30O16	Quercetin-3-O-neohesperidoside	Flavonoids	Flavonols	117611-67-3	A	2366000	3221700	3116600	3211900	2848600	3083700	0.426345	1.05054	0.0711287	insig
Lmyn001269	C27H30O16	Kaempferol-3-O-sophoroside	Flavonoids	Flavonoid	19895-95-5	B	592550	396070	564030	729980	366930	383700	0.208171	0.953602	-0.068541	insig
mws4134	C20H32N6O12S2	Oxiglutatione	Amino acids and derivatives	Amino acids and derivatives	27025-41-8	A	1854200	1791700	1837800	1350200	1693400	1215000	1.1796	0.776592	-0.36477	insig
Rfmb26201	C30H38O14	Syringaresinol-4'-O-(6''-acetyl)glucoside	Lignans and Coumarins	Lignans	-	B	46774	84940	46635	59696	18099	21422	0.887662	0.556308	-0.846044	insig
Hmjp002999	C28H32O16	Isorhamnetin-3-O-rutinoside (Narcissin)	Flavonoids	Flavonoid	604-80-8	B	4415900	3733300	4443200	3932600	4737400	2189000	0.538294	0.862346	-0.213662	insig
Zmxp002867	C28H32O16	Chrysoeriol-5,7-di-O-glucoside	Flavonoids	Flavonoid	-	B	194490	134560	214320	213630	131050	132090	0.429623	0.877432	-0.188641	insig
Lmsp004045	C28H32O16	Isorhamnetin-3-O-glucoside-7-O-rhamnoside	Flavonoids	Flavonols	-	A	8974.5	13646	22480	13111	22721	29185	0.674151	1.4416	0.527674	insig
pme1540	C28H32O16	Isorhamnetin-3-O-neohesperidoside	Flavonoids	Flavonols	55033-90-4	A	21845	25916	14656	24950	27518	23592	0.801872	1.21858	0.285199	insig
Hmln002149	C29H36O15	Acteoside	Phenolic acids	Phenolic acids	61276-17-3	B	10562	8530.2	6505.6	13275	9541	11665	0.997348	1.34703	0.429782	insig
pmp000596	C27H30O17	Quercetin-3-O-(2''-O-galactosyl)glucoside	Flavonoids	Flavonols	56782-99-1	A	9	9	9	23613	29449	23334	1.47156	2829.48	11.4663	up
Lmtp003677	C27H30O17	Quercetin-3-O-sophoroside (Baimaside)	Flavonoids	Flavonols	18609-17-1	B	31677	35542	49400	96100	61466	49597	1.15145	1.77641	0.828963	insig
Lmsp003729	C27H30O17	Myricetin-3-O-rutinoside	Flavonoids	Flavonols	-	B	76104	148110	113890	208030	233110	389080	1.25226	2.45552	1.29603	up
Hmlp002975	C28H30O17	Isorhamnetin-3-O-glucuronide-7-O-rhamnoside	Flavonoids	Flavonols	-	B	441220	362170	365020	100860	337700	241310	1.01971	0.581876	-0.781216	insig
Lmmp002560	C27H28O18	Quercetin-3-O-(2''-O-glucosyl)glucuronide	Flavonoids	Flavonols	-	B	242200	143980	208460	171140	146950	116410	0.911869	0.730694	-0.45266	insig
Hmcp001578	C28H32O17	Isorhamnetin-3,7-O-diglucoside	Flavonoids	Flavonols	6758-51-6	B	62465	74053	69959	94839	73497	82040	1.10901	1.21261	0.278115	insig
mws1506	C29H36O16	Plantamajoside	Phenolic acids	Phenolic acids	104777-68-6	B	10630	14641	13267	15345	15885	26723	0.995474	1.50379	0.588602	insig
pmb0530	C21H27N7O14P2	Nicotinic acid adenine dinucleotide	Nucleotides and derivatives	Nucleotides and derivatives	53-84-9	A	2433400	3373600	3287900	3176000	2868400	2530200	0.257792	0.942792	-0.0849884	insig
Lmhp008744	C33H56O14	1-α-Linolenoyl-glycerol-2,3-di-O-glucoside	Lipids	Glycerol ester	-	A	206500	112820	200860	298910	91348	177020	0.0394104	1.09054	0.125045	insig
Lmhp008513	C33H56O14	2-α-Linolenoyl-glycerol-1,3-di-O-glucoside	Lipids	Glycerol ester	-	A	316490	207920	356140	264380	229610	295870	0.378858	0.897008	-0.156808	insig
Lmhp009190	C33H58O14	2-Linoleoylglycerol-1,3-di-O-glucoside	Lipids	Glycerol ester	-	A	26008	8628.5	17743	11976	10981	8864.4	0.781293	0.607516	-0.719005	insig
Lmhp009384	C33H58O14	1-Linoleoylglycerol-2,3-di-O-glucoside	Lipids	Glycerol ester	-	A	13203	7520.5	10402	7876.2	12061	9144.6	0.249642	0.93434	-0.0979804	insig
Lmmn004145	C38H60O10	3-O-(2-O-Acetyl-glucosyl)oleanolic acid	Terpenoids	Triterpene	-	A	9064000	4368700	10024000	5443800	5071100	5486300	0.788824	0.682159	-0.55182	insig
Lmsn006130	C36H56O12	2α,3β,19α-Trihydroxyurs-12-en-23,28-dioic acid-28-O-glucoside	Terpenoids	Triterpene	-	A	10729	8946.6	14029	19495	29105	29544	1.32265	2.3185	1.21319	up
Lmmp003266	C29H30O19	Quercetin-3-O-(2''-malonyl)glucoside-7-O-arabinoside	Flavonoids	Flavonols	-	A	43505	41544	48434	62213	24699	40980	0.256529	0.958115	-0.06173	insig
pmn001370	C32H42O16	Pinoresinol-4,4'-O-di-O-glucoside	Lignans and Coumarins	Lignans	63902-38-5	B	117520	120470	118920	95919	202790	171460	0.616384	1.31733	0.397619	insig
pmn001368	C32H44O17	Olivil-4,4'-Di-O-glucoside	Lignans and Coumarins	Lignans	-	B	86754	94742	69574	92508	105090	92099	0.875527	1.15385	0.206455	insig
Xmyp004678	C32H38O19	Kaempferol-3-O-(2-O-Xylosyl-6-O-Rhamnosyl)Glucoside	Flavonoids	Flavonoid	-	A	13974	13058	9034.8	132130	104560	60252	1.43488	8.23311	3.04144	up
Zmlp003063	C33H40O19	Luteolin-7-O-(2''-O-rhamnosyl)rutinoside	Flavonoids	Flavonoid	-	B	8855.4	7764	10409	104550	71224	43086	1.43381	8.09741	3.01746	up
Lmsp003881	C33H40O19	Kaempferol-3-O-rutinoside-7-O-rhamnoside	Flavonoids	Flavonols	-	A	298620	245850	243490	3116600	2554300	2068500	1.4657	9.82207	3.29603	up
mws1035	C33H40O19	Kaempferol-3-O-robinoside-7-O-rhamnoside (Robinin)	Flavonoids	Flavonols	301-19-9	B	16018	25159	23141	24653	46096	34375	1.05333	1.63444	0.708798	insig
HJAP061	C32H38O20	Quercetin-3-O-(2''-O-arabinosyl)rutinoside	Flavonoids	Flavonols	-	A	2089800	1123500	2271500	2580200	3001800	3113700	1.06102	1.58542	0.664863	insig
Hmcp001618	C32H38O20	Quercetin-3-O-(2''-O-Xylosyl)rutinoside	Flavonoids	Flavonols	129235-39-8	B	47203	30968	43993	57041	60481	42230	0.913794	1.30768	0.387015	insig
Hmqp002870	C32H38O20	Luteolin-7-O-Sophoroside-5-O-arabinoside	Flavonoids	Flavonoid	-	B	5590	11626	10916	172370	138150	73848	1.43611	13.663	3.7722	up
pme2651	C21H28N7O17P3	NADP (Nicotinamide adenine dinucleotide phosphate)	Nucleotides and derivatives	Nucleotides and derivatives	53-59-8	B	582450	478780	842650	432200	676420	831910	0.017023	1.01925	0.0275082	insig
Lmyp003857	C35H28O19	Kaempferol-3-O-(2'',6''-digalloyl)glucoside	Flavonoids	Flavonoid	-	B	9325.2	13907	15691	360120	361510	319440	1.46786	26.7468	4.74129	up
Lnrp102163	C33H40O20	Quercetin-3-O-rutinoside-7-O-rhamnoside	Flavonoids	Flavonols	-	A	25632	11608	8902.5	36564	38499	31632	1.20491	2.31229	1.20932	up
pmp001105	C33H40O20	Kaempferol-3-O-neohesperidoside-7-O-glucoside	Flavonoids	Flavonols	-	A	53668	70319	84472	110690	90687	155400	1.16085	1.7115	0.775259	insig
Hmcp001559	C33H40O20	Isorhamnetin-3-O-rutinoside-7-O-arabinoside	Flavonoids	Flavonols	-	B	36914	31891	25585	9	5522.5	6825.6	1.00856	0.130915	-2.93329	down
HJAP127	C33H40O20	Quercetin-3-O-(2''-O-Rhamnosyl)rutinoside	Flavonoids	Flavonols	55696-57-6	A	5382000	8708400	7869800	18992000	20721000	16026000	1.40156	2.53818	1.3438	up
Hmcp001329	C32H38O21	Quercetin-3-O-xylosyl(1→2)glucosyl(1→2)glucoside	Flavonoids	Flavonols	-	A	10900	20507	16947	69218	121410	128180	1.409	6.59321	2.72098	up
pmn001505	C41H64O13	Oleanolic acid-3-O-xylosyl(1→3)glucuronide	Terpenoids	Triterpene	-	A	137030	34713	97060	44219	33019	40158	0.948656	0.436736	-1.19517	insig
Lmyp003588	C35H28O20	Quercetin-3-O-(2'',6''-digalloyl)-glucoside	Flavonoids	Flavonols	-	B	26721	28190	36707	654300	679840	604060	1.46932	21.1552	4.40294	up
HJAP128	C34H42O20	Isorhamnetin-3-O-rutinoside-7-O-rhamnoside	Flavonoids	Flavonoid	-	A	981320	1153000	1022000	908160	1824600	1472100	0.710821	1.3322	0.413814	insig
HJAP023	C33H40O21	Kaempferol-6,8-di-C-glucoside-7-O-glucoside	Flavonoids	Flavonoid	-	B	20349	16252	14880	28264	33360	51881	1.27602	2.20479	1.14064	up
pme2746	C27H33N9O15P2	Riboflavin 5'-Adenosine Diphosphate	Nucleotides and derivatives	Nucleotides and derivatives	146-14-5	A	1812300	1852000	1973300	2267200	2140700	2176100	1.38054	1.16787	0.223883	insig
Hmcp001589	C34H42O21	Isorhamnetin-3-O-rutinoside-4'-O-glucoside	Flavonoids	Flavonols	111393-97-6	B	137340	149950	153230	77359	125950	152080	0.816265	0.806749	-0.309808	insig
Lmhp003162	C34H42O21	Chrysoeriol-6,8-di-C-glucoside-4'-O-glucoside	Flavonoids	Flavonoid	-	B	46111	47144	55699	17662	41451	64307	0.608203	0.828578	-0.271291	insig
pmb0676	C38H40O19	Chrysoeriol-8-C-glucoside-7-O-(6''-feruloyl)glucoside	Flavonoids	Flavonoid carbonoside	-	B	4702.7	6503.1	8269.3	143700	93705	109830	1.46306	17.8297	4.15621	up
Lmhp002374	C39H50O25	Quercetin-3-O-glucosyl(1→4)rhamnoside-7-O-rutinoside	Flavonoids	Flavonols	-	B	46702	65998	50323	141210	67296	64886	0.993243	1.67701	0.745896	insig
HJAP123	C40H52O25	Isorhamnetin-3-O-rutinoside-7-O-rutinoside	Flavonoids	Flavonoid	-	A	9083.2	20220	10548	56248	89822	77793	1.40341	5.61747	2.48992	up
