# Supplementary material for: Elucidating the Differentiation Synthesis Mechanisms of Differently Colored Resistance Quinoa Seedings Using Metabolite Profiling and Transcriptome Analysis
Source: Metabolites. 2023 Oct 10;13(10):1065. doi: 10.3390/metabo13101065 (PMC10609267; doi:10.3390/metabo13101065)
Supplement: Supplementary file 1 [file metabolites-13-01065-s001.zip › Table S4.xlsx]

## Sheet: Sheet1
Table S4 All metabolites in R-RvsR-B
Index	Formula	Compounds	Class I	Class II	CAS	Level	R-R1	R-R2	R-R3	R-B1	R-B2	R-B3	VIP	Fold_Change	Log2FC	Type
pme1987	C3H7NO2	L-Alanine	Amino acids and derivatives	Amino acids and derivatives	56-41-7	B	3594.6	3233.3	2721.7	4567.6	6709.8	5798.1	1.30079	1.78809	0.838416	insig
ML10198895	C3H7NO2	N-Methylglycine	Amino acids and derivatives	Amino acids and derivatives	107-97-1	B	20050	12981	20779	19070	18423	19727	0.355103	1.06337	0.0886452	insig
pme3017	C4H9NO2	2-Aminoisobutyric acid	Amino acids and derivatives	Amino acids and derivatives	62-57-7	B	3700300	1767500	3457100	1720400	690670	570290	1.17984	0.33405	-1.58187	down
pme3033	C4H9NO2	N,N-Dimethylglycine	Amino acids and derivatives	Amino acids and derivatives	1118-68-9	B	468520	296270	422150	484060	201680	309490	0.533869	0.838484	-0.254145	insig
pme0006	C5H9NO2	L-Proline	Amino acids and derivatives	Amino acids and derivatives	147-85-3	B	32596000	38238000	37415000	35151000	37279000	24885000	0.544447	0.898992	-0.15362	insig
pme3193	C4H7NO3	N-Acetyl-L-glycine	Amino acids and derivatives	Amino acids and derivatives	543-24-8	B	6827.4	7085.4	6837.7	10666	11882	13389	1.39921	1.73186	0.792324	insig
pme0120	C5H11NO2	5-Aminovaleric acid	Amino acids and derivatives	Amino acids and derivatives	660-88-8	B	11353	13196	19028	15169	12651	15346	0.047774	0.990568	-0.0136715	insig
mws0256	C5H11NO2	L-Valine	Amino acids and derivatives	Amino acids and derivatives	72-18-4	B	9042800	8205800	8289900	9058400	8674700	6176100	0.412076	0.936202	-0.0951079	insig
mws0230	C4H9NO3	L-Threonine	Amino acids and derivatives	Amino acids and derivatives	72-19-5	B	1410600	1338700	1384900	1417100	1574500	1511300	1.11891	1.08918	0.123246	insig
pme0195	C3H7NO2S	L-Cysteine	Amino acids and derivatives	Amino acids and derivatives	52-90-4	B	5236.7	8736.4	7644.7	7461.2	5257.5	18125	0.390363	1.42677	0.512756	insig
mws0263	C5H7NO3	5-Oxo-L-Proline	Amino acids and derivatives	Amino acids and derivatives	98-79-3	A	4507.1	9	3025.4	8057.4	13998	3049.6	0.770056	3.32891	1.73505	insig
ML10181668	C6H11NO2	Cycloleucine*	Amino acids and derivatives	Amino acids and derivatives	52-52-8	B	16591000	11536000	11441000	19119000	23398000	8888700	0.451082	1.29917	0.377594	insig
Rfmb319	C6H11NO2	Pipecolic acid*	Amino acids and derivatives	Amino acids and derivatives	4043-87-2	B	5718100	2988100	3271300	5489900	7634500	2130200	0.274313	1.2736	0.348918	insig
mws0227	C6H13NO2	L-Leucine*	Amino acids and derivatives	Amino acids and derivatives	61-90-5	A	1272600	1279000	1203100	1623500	1569500	1067900	0.571019	1.13482	0.182461	insig
mws0258	C6H13NO2	L-Isoleucine*	Amino acids and derivatives	Amino acids and derivatives	73-32-5	A	1288900	1208000	1199100	1584500	1480800	1023700	0.447936	1.10633	0.145783	insig
pme2527	C5H12N2O2	L-Ornithine	Amino acids and derivatives	Amino acids and derivatives	70-26-8	B	39404	43599	46753	32831	31772	19661	1.12884	0.649403	-0.622813	insig
mws0219	C4H7NO4	L-Aspartic Acid	Amino acids and derivatives	Amino acids and derivatives	56-84-8	A	19381000	17446000	15488000	15094000	17133000	13398000	0.830772	0.872121	-0.1974	insig
pme1002	C8H11NO	L-Tyramine	Amino acids and derivatives	Amino acids and derivatives	51-67-2	A	2379100	1896700	1883500	4767400	5616600	4479800	1.40876	2.41323	1.27096	up
Rfmb320	C7H13NO2	1-Methylpiperidine-2-carboxylic acid	Amino acids and derivatives	Amino acids and derivatives	7730-87-2	B	178970	212830	226490	288710	307210	334340	1.34392	1.50457	0.58935	insig
pme0193	C5H10N2O3	L-Glutamine	Amino acids and derivatives	Amino acids and derivatives	56-85-9	A	4956400	3063200	3894100	2056200	2079700	1605400	1.31901	0.481907	-1.05317	down
pme0026	C6H14N2O2	L-Lysine	Amino acids and derivatives	Amino acids and derivatives	56-87-1	B	5291600	3239400	4069400	2147900	2023400	1642600	1.33108	0.461406	-1.11589	down
mws1050	C5H9NO4	O-Acetylserine	Amino acids and derivatives	Amino acids and derivatives	5147-00-2	B	1014500	1134000	1430100	808600	1328500	688330	0.717448	0.789535	-0.340925	insig
pme0014	C5H9NO4	L-Glutamic acid	Amino acids and derivatives	Amino acids and derivatives	56-86-0	A	71886000	78598000	68649000	67966000	64620000	71559000	0.8426	0.931603	-0.102213	insig
pme1210	C5H11NO2S	L-Methionine	Amino acids and derivatives	Amino acids and derivatives	63-68-3	A	6007700	6435800	7290400	6731700	5582400	5604500	0.712106	0.908011	-0.139218	insig
mws0254	C6H9N3O2	L-Histidine	Amino acids and derivatives	Amino acids and derivatives	71-00-1	B	1308700	728480	908570	875840	1085400	439490	0.496875	0.814981	-0.295162	insig
pme0128	C6H12N2O3	L-Alanyl-L-Alanine	Amino acids and derivatives	Amino acids and derivatives	1948-31-8	B	19218	16275	15035	27882	25953	30985	1.35691	1.67867	0.747321	insig
pme3382	C6H11NO4	N-Acetyl-L-threonine	Amino acids and derivatives	Amino acids and derivatives	17093-74-2	A	123180	97989	119990	99672	88415	82584	1.13685	0.793387	-0.333904	insig
pme2914	C6H10O5	3-Hydroxy-3-methylpentane-1,5-dioic acid	Amino acids and derivatives	Amino acids and derivatives	503-49-1	A	439170	259750	280690	345320	137300	252910	0.686424	0.75084	-0.413423	insig
pme2758	C5H9NO5	4-Hydroxy-L-glutamic acid	Amino acids and derivatives	Amino acids and derivatives	3913-68-6	A	103430	51270	58059	22223	47700	21110	1.13815	0.427869	-1.22476	down
Lmbp000123	C6H13NO2S	L-Homomethionine	Amino acids and derivatives	Amino acids and derivatives	25148-30-5	B	681820	312540	621920	20514	77809	78354	1.33198	0.109311	-3.19349	down
pme1419	C6H13NO2S	L-Methionine methyl ester	Amino acids and derivatives	Amino acids and derivatives	10332-17-9	A	153400	184120	150230	125260	118730	86096	1.18054	0.676752	-0.5633	insig
pme0021	C9H11NO2	L-Phenylalanine	Amino acids and derivatives	Amino acids and derivatives	63-91-2	A	11777000	11983000	12830000	31011000	19097000	13084000	1.02102	1.72703	0.788293	insig
pme0181	C7H11N3O2	3-Methyl-L-Histidine	Amino acids and derivatives	Amino acids and derivatives	368-16-1	B	40338	33274	26552	27129	25181	31087	0.800006	0.832605	-0.264297	insig
pme0253	C8H15NO3	N-Acetyl-L-leucine	Amino acids and derivatives	Amino acids and derivatives	1188-21-2	A	84220	72324	70935	70188	51207	54120	1.11353	0.771566	-0.374139	insig
Zmyn000155	C7H14N2O3	N-α-Acetyl-L-ornithine	Amino acids and derivatives	Amino acids and derivatives	6205-08-9	B	112980	61730	68225	60245	54566	23535	0.932382	0.569477	-0.812289	insig
mws0260	C6H14N4O2	L-Arginine	Amino acids and derivatives	Amino acids and derivatives	74-79-3	A	284440	109710	192190	221870	157380	52672	0.506179	0.736641	-0.440967	insig
pme2559	C6H9NO5	N-Acetyl-L-Aspartic Acid	Amino acids and derivatives	Amino acids and derivatives	997-55-7	A	49759	33743	39601	27093	30974	12659	1.01579	0.574527	-0.799553	insig
pmb0468	C6H11NO3S	N-Formyl-L-Methionine	Amino acids and derivatives	Amino acids and derivatives	4289-98-9	B	208770	159780	114540	11979	17875	15185	1.42525	0.0932311	-3.42305	down
mws0250	C9H11NO3	L-Tyrosine	Amino acids and derivatives	Amino acids and derivatives	60-18-4	A	1688700	1583100	1580600	1646300	1434100	976920	0.757177	0.836147	-0.258171	insig
pme2602	C3H8NO6P	O-Phospho-L-serine	Amino acids and derivatives	Amino acids and derivatives	407-41-0	B	32386	8077.8	29164	21784	7290.8	21197	0.364975	0.722008	-0.469914	insig
pme0122	C8H16N2O3	N6-Acetyl-L-lysine	Amino acids and derivatives	Amino acids and derivatives	692-04-6	A	69843	49478	64977	66313	61226	49215	0.200915	0.959066	-0.0602976	insig
mws0736	C8H16N2O3	N-Glycyl-L-leucine*	Amino acids and derivatives	Amino acids and derivatives	869-19-2	B	1743800	386190	654140	351650	386700	334710	0.95581	0.38542	-1.3755	insig
mws5041	C8H16N2O3	L-Glycyl-L-isoleucine*	Amino acids and derivatives	Amino acids and derivatives	19461-38-2	B	1445500	310470	516380	288210	329610	231110	0.947871	0.373591	-1.42047	insig
Zmjp000182	C7H16N4O2	N-Monomethyl-L-arginine	Amino acids and derivatives	Amino acids and derivatives	17035-90-4	B	98643	81061	114740	63517	56572	40242	1.2575	0.544521	-0.87694	insig
pme3388	C7H16N4O2	Homoarginine	Amino acids and derivatives	Amino acids and derivatives	156-86-5	B	14351	1900.2	13222	7856.4	13251	8901.1	0.309552	1.01816	0.0259675	insig
pme0075	C7H11NO5	N-Acetyl-L-glutamic acid	Amino acids and derivatives	Amino acids and derivatives	1188-37-0	A	1224300	1440800	1432000	1678500	1873900	978610	0.265167	1.10591	0.14523	insig
pme0278	C7H14N2O4	2,6-Diaminooimelic acid	Amino acids and derivatives	Amino acids and derivatives	583-93-7	B	25094	24816	15402	13220	24878	4945.4	0.713298	0.659043	-0.601556	insig
pmb2561	C7H13NO3S	N-Acetyl-L-methionine	Amino acids and derivatives	Amino acids and derivatives	65-82-7	B	10955	12849	13432	11923	21907	11646	0.525841	1.22129	0.288407	insig
pme3827	C9H11NO4	3,4-Dihydroxy-L-phenylalanine (L-Dopa)	Amino acids and derivatives	Amino acids and derivatives	59-92-7	B	16387	26234	19993	97550	259430	121290	1.38012	7.63839	2.93327	up
mws5037	C9H18N2O3	L-Alanyl-L-leucine	Amino acids and derivatives	Amino acids and derivatives	3303-34-2	B	55799	60833	44550	68460	63231	54420	0.799717	1.15466	0.207473	insig
NK10251888	C8H18N4O2	NG,NG-Dimethyl-L-arginine	Amino acids and derivatives	Amino acids and derivatives	30315-93-6	A	101170	95665	116210	80538	54797	141830	0.504726	0.885384	-0.175625	insig
mws0282	C11H12N2O2	L-Tryptophan	Amino acids and derivatives	Amino acids and derivatives	73-22-3	A	3728000	3189100	3857800	5570300	5506900	4437500	1.28917	1.43989	0.525961	insig
Zmgn002106	C11H13NO3	N-Acetyl-L-phenylalanine	Amino acids and derivatives	Amino acids and derivatives	2018-61-3	A	104260	62366	57248	123870	301110	75563	0.887147	2.23582	1.16081	insig
pmb2873	C13H13NO2	3-(2-Naphthyl)-L-alanine	Amino acids and derivatives	Amino acids and derivatives	58438-03-2	B	10595	6800.8	16061	7143.5	9	9606.7	0.71741	0.500921	-0.997346	insig
pme0170	C8H16N4O3	N-Acetyl-L-Arginine	Amino acids and derivatives	Amino acids and derivatives	155-84-0	A	16896	20507	15964	30425	33375	39037	1.37482	1.92698	0.94634	insig
Lmrj001698	C9H18N2O4	L-Seryl-L-Isoleucine	Amino acids and derivatives	Amino acids and derivatives	91086-51-0	A	2573300	371100	872130	111770	79194	52642	1.30919	0.0638292	-3.96964	down
mws5042	C11H14N2O3	L-Glycyl-L-phenylalanine	Amino acids and derivatives	Amino acids and derivatives	721-66-4	B	700480	159170	295350	159850	132130	125750	1.0195	0.361671	-1.46725	down
mws0520	C11H13NO4	N-Acetyl-L-tyrosine	Amino acids and derivatives	Amino acids and derivatives	537-55-3	A	37270	46380	42697	63757	50595	58215	1.24718	1.36582	0.449765	insig
Lmhp001461	C11H20N2O3	L-Prolyl-L-Leucine	Amino acids and derivatives	Amino acids and derivatives	52899-07-7	B	125920	48507	72064	54746	57376	36919	0.849316	0.604651	-0.725826	insig
Lmhp001670	C11H22N2O3	L-Valyl-L-Leucine	Amino acids and derivatives	Amino acids and derivatives	3989-97-7	B	2721200	436330	1149000	184510	135920	138000	1.28357	0.10645	-3.23175	down
pmb0962	C10H22N2O4	L-Lysine-Butanoic Acid	Amino acids and derivatives	Amino acids and derivatives	80407-71-2	B	12318000	10045000	9602900	9986400	15105000	11312000	0.557722	1.13882	0.187539	insig
mws4176	C12H16N2O3	L-Alanyl-L-Phenylalanine	Amino acids and derivatives	Amino acids and derivatives	3061-90-3	B	237740	34866	110550	18609	14108	8707	1.24609	0.108113	-3.20939	down
Lmhp002031	C12H24N2O3	L-Leucyl-L-Leucine	Amino acids and derivatives	Amino acids and derivatives	3303-31-9	B	1242600	246820	668020	105570	117500	97374	1.27527	0.14853	-2.75118	down
pmb2591	C13H14N2O3	N-Acetyl-L-Tryptophan	Amino acids and derivatives	Amino acids and derivatives	1218-34-4	A	20929000	11676000	13623000	12742000	31137000	9759100	0.106279	1.16029	0.214491	insig
mws0124	C13H14N2O3	N-(3-Indolylacetyl)-L-alanine	Amino acids and derivatives	Amino acids and derivatives	57105-39-2	B	10683	10662	11919	14341	13048	17080	1.21892	1.33685	0.418838	insig
pme2563	C8H14N2O5S	γ-Glu-Cys	Amino acids and derivatives	Amino acids and derivatives	636-58-8	B	26162	23358	8979	17051	19461	12515	0.176382	0.838083	-0.254835	insig
Lmhp001732	C14H18N2O3	L-Prolyl-L-Phenylalanine	Amino acids and derivatives	Amino acids and derivatives	13589-02-1	B	53490	51220	39421	37362	40624	37165	1.0635	0.798933	-0.323854	insig
mws0715	C13H16N2O4	Phenylacetyl-L-glutamine	Amino acids and derivatives	Amino acids and derivatives	28047-15-6	B	13894	7843.1	7287.2	24391	20552	26204	1.29889	2.45129	1.29354	up
Lmhp002001	C14H20N2O3	L-Valyl-L-Phenylalanine	Amino acids and derivatives	Amino acids and derivatives	3918-92-1	B	362700	90740	233270	52632	60922	45324	1.23196	0.231361	-2.11178	down
pme2890	C8H16N2O4S2	L-Homocystine	Amino acids and derivatives	Amino acids and derivatives	626-72-2	B	33534	4007.1	16102	3472.7	3313.7	4596.6	1.03352	0.212199	-2.23651	down
mws5035	C15H22N2O3	L-Leucyl-L-phenylalanine	Amino acids and derivatives	Amino acids and derivatives	56217-82-4	B	491550	92364	164150	59438	39152	47683	1.1891	0.195535	-2.3545	down
mws0629	C13H16N2O5	L-Aspartyl-L-Phenylalanine	Amino acids and derivatives	Amino acids and derivatives	13433-09-5	A	39991	27003	23274	19579	15920	33696	0.709463	0.766551	-0.383547	insig
mws1375	C12H21N3O6	Nicotianamine	Amino acids and derivatives	Amino acids and derivatives	34441-14-0	B	161930	122560	118740	175830	113990	127580	0.107314	1.03514	0.0498276	insig
pme1086	C10H17N3O6S	Glutathione reduced form	Amino acids and derivatives	Amino acids and derivatives	70-18-8	A	97226	66353	85456	498440	612480	382750	1.42021	5.99783	2.58444	up
mws0636	C18H20N2O3	L-Phenylalanyl-L-phenylalanine	Amino acids and derivatives	Amino acids and derivatives	2577-40-4	A	55708	15768	50554	12060	8418	6322.5	1.22755	0.219622	-2.1869	down
mws0582	C11H19N3O6S	S-(Methyl)glutathione	Amino acids and derivatives	Amino acids and derivatives	2922-56-7	A	60516	54405	47609	70147	75305	89768	1.25322	1.44724	0.533305	insig
pme1286	C14H20N6O5S	S-(5'-Adenosy)-L-homocysteine	Amino acids and derivatives	Amino acids and derivatives	979-92-0	A	350110	333120	364550	628140	505620	434060	1.26917	1.49633	0.581424	insig
pme2735	C15H22N6O5S	S-Adenosyl-L-methionine	Amino acids and derivatives	Amino acids and derivatives	29908-03-0	B	1690800	1677500	1856600	1192600	1107100	1050200	1.4078	0.641141	-0.641285	insig
mws4134	C20H32N6O12S2	Oxiglutatione	Amino acids and derivatives	Amino acids and derivatives	27025-41-8	A	1854200	1791700	1837800	1917400	1664000	1613900	0.663135	0.947408	-0.0779426	insig
pmb0069	C7H7NO	Benzamide	Phenolic acids	Phenolic acids	55-21-0	B	31712000	30514000	33033000	40880000	91435000	31708000	0.837798	1.72186	0.783971	insig
pme0241	C7H6O2	Benzoic acid	Phenolic acids	Phenolic acids	65-85-0	B	33194	25686	23205	16645	19150	24010	1.07038	0.728574	-0.456853	insig
Lmbn001930	C7H6O2	2-Hydroxybenzaldehyde (Salicylaldehyde)	Phenolic acids	Phenolic acids	90-02-8	B	51779	36896	53394	24293	32505	12698	1.12495	0.489171	-1.03159	down
mws0628	C7H6O2	4-Hydroxybenzaldehyde	Phenolic acids	Phenolic acids	123-08-0	B	228390	193360	299920	222470	182850	305230	0.109002	0.984591	-0.0224031	insig
ML10179289	C8H10O	2-Phenylethanol	Phenolic acids	Phenolic acids	60-12-8	B	19580000	18542000	21317000	25377000	68203000	19300000	0.795409	1.89909	0.925308	insig
mws0566	C7H8O2	4-Methylcatechol	Phenolic acids	Phenolic acids	452-86-8	B	356.62	359.95	710.25	2070.2	359.07	720.93	0.674224	2.20785	1.14264	insig
pmp001086	C6H6O3	5-Hydroxymethylfurfural	Phenolic acids	Phenolic acids	67-47-0	B	36692	62071	42636	41457	51088	92852	0.535944	1.31116	0.390846	insig
NK10264324	C6H6O3	1,3,5-Benzenetriol	Phenolic acids	Phenolic acids	108-73-6	B	36333	24642	23252	27934	18439	9	0.65479	0.550679	-0.860718	insig
Zmyn002919	C8H8O2	2-Methylbenzoic acid	Phenolic acids	Phenolic acids	118-90-1	B	9002.9	11604	14551	1425.7	2914.9	2585.5	1.37698	0.197	-2.34373	down
mws1336	C7H7NO2	4-Aminobenzoic acid	Phenolic acids	Phenolic acids	150-13-0	B	859110	1111900	930730	1112500	1213600	1130000	1.09578	1.19104	0.252227	insig
mws1078	C7H7NO2	Anthranilic Acid	Phenolic acids	Phenolic acids	118-92-3	B	656190	514570	554190	299230	438300	525690	0.999562	0.732323	-0.449449	insig
Hmgn001653	C7H6O3	Protocatechualdehyde*	Phenolic acids	Phenolic acids	139-85-5	B	3247000	1120500	2022100	220500	340290	184220	1.37042	0.116597	-3.10039	down
Lmgn001670	C7H6O3	Salicylic acid	Phenolic acids	Phenolic acids	69-72-7	A	57584	46144	52063	61819	44732	69643	0.472874	1.13096	0.177553	insig
mws0749	C7H6O3	4-Hydroxybenzoic acid	Phenolic acids	Phenolic acids	99-96-7	B	3418100	1110600	2006900	188580	369970	234240	1.36035	0.121303	-3.04331	down
Lmbn001981	C7H6O3	2,5-Dihydroxybenzaldehyde*	Phenolic acids	Phenolic acids	1194-98-5	B	3295400	1107200	2042400	132760	313460	210040	1.36709	0.101825	-3.29584	down
pme2828	C6H5NO3	4-Nitrophenol	Phenolic acids	Phenolic acids	100-02-7	B	19897000	18304000	18602000	17678000	18111000	17510000	1.09947	0.938313	-0.0918587	insig
pmp001285	C8H4O3	Phthalic anhydride	Phenolic acids	Phenolic acids	85-44-9	A	772880	850150	678380	624920	837860	1818900	0.498319	1.42594	0.511917	insig
mws2213	C9H8O2	Cinnamic acid	Phenolic acids	Phenolic acids	140-10-3	A	6443	3642.1	7247	61754	50312	53884	1.41637	9.57472	3.25923	up
Lmxp001668	C9H10O2	2-Methoxy-4-ethenylphenol	Phenolic acids	Phenolic acids	7786-61-0	A	1589600	1772200	1402700	1559300	1040100	2178400	0.14757	1.00279	0.00402164	insig
mws0182	C8H8O3	p-Hydroxyphenyl acetic acid	Phenolic acids	Phenolic acids	156-38-7	B	9044.3	4432.1	3722.5	7325.5	9	4815.5	0.636545	0.706441	-0.50136	insig
pme2362	C8H8O3	Mandelic acid	Phenolic acids	Phenolic acids	90-64-2	B	72062	95616	68364	48027	29240	57140	1.15773	0.56942	-0.812435	insig
mws0458	C8H8O3	Vanillin	Phenolic acids	Phenolic acids	121-33-5	B	316460	239060	288770	233680	178480	333470	0.549572	0.883144	-0.179279	insig
mws0444	C7H7NO3	3-Aminosalicylic acid	Phenolic acids	Phenolic acids	570-23-0	B	21198	12398	5367.8	8740.6	9183.8	2859	0.683062	0.533403	-0.906703	insig
mws0183	C7H6O4	3,4-Dihydroxybenzoic acid (Protocatechuic acid)*	Phenolic acids	Phenolic acids	99-50-3	A	87331	109190	96513	51528	45674	206390	0.337358	1.03603	0.0510657	insig
mws0885	C7H6O4	2,4-Dihydroxybenzoic acid	Phenolic acids	Phenolic acids	89-86-1	A	1047500	242980	477720	344680	322170	236750	0.743061	0.511028	-0.968525	insig
mws0180	C7H6O4	2,5-Dihydroxybenzoic acid; Gentisic Acid*	Phenolic acids	Phenolic acids	490-79-9	A	56864	88284	35424	22252	41674	126490	0.194245	1.05452	0.0765805	insig
pmf0440	C10H10O2	4-MethoxycinnaMaldehyde	Phenolic acids	Phenolic acids	1963-36-6	B	199300	214620	165340	160300	207180	125640	0.656498	0.851293	-0.232272	insig
pme1439	C9H8O3	p-Coumaric acid	Phenolic acids	Phenolic acids	501-98-4	A	1500300	2813200	2972900	1998500	2063900	1948300	0.437936	0.82492	-0.277673	insig
pmb0142	C9H8O3	Caffeic aldehyde	Phenolic acids	Phenolic acids	141632-15-7	B	116420	99040	122120	123340	93643	187400	0.428957	1.19789	0.260493	insig
pme3083	C8H7NO3	2-(Formylamino)benzoic acid	Phenolic acids	Phenolic acids	3342-77-6	B	433540	135830	268620	121410	86340	96656	1.16239	0.363257	-1.46094	down
pme0281	C8H6O4	Terephthalic acid	Phenolic acids	Phenolic acids	100-21-0	A	1052000	948110	1170800	338810	429710	117260	1.23822	0.279346	-1.83988	down
pme3381	C9H10O3	3-Hydroxyphenylacetic Acid Methyl Ester	Phenolic acids	Phenolic acids	42058-59-3	B	10563	15952	19285	5228.9	4257.1	11126	1.14235	0.450044	-1.15186	down
mws0467	C9H10O3	3-(4-Hydroxyphenyl)-propionic acid	Phenolic acids	Phenolic acids	501-97-3	B	35342	75529	76627	69317	56267	66080	0.228422	1.02222	0.0317042	insig
pmn001681	C10H14O2	1-(4-Methoxyphenyl)-1-propanol	Phenolic acids	Phenolic acids	5349-60-0	B	12344	9852.7	6612.4	8672.1	5340.1	7864.5	0.726532	0.759368	-0.397129	insig
NK10253223	C8H9NO3	2-Amino-3-methoxybenzoic acid	Phenolic acids	Phenolic acids	3177-80-8	B	134110	123300	113110	90668	132970	80014	0.800663	0.819529	-0.287133	insig
mws0028	C8H8O4	Vanillic acid	Phenolic acids	Phenolic acids	121-34-6	B	430370	161550	261630	10887	26231	18950	1.39617	0.065688	-3.92823	down
Hmbp001276	C8H8O4	Gallacetophenone	Phenolic acids	Phenolic acids	528-21-2	B	202770	258090	258760	12513	27598	11335	1.40663	0.0714905	-3.8061	down
pme1292	C8H8O4	Homogentisic acid	Phenolic acids	Phenolic acids	451-13-8	B	53948	60262	64736	53305	49554	62318	0.635887	0.923055	-0.115511	insig
pme2598	C8H8O4	3,4-Dihydroxybenzeneacetic acid	Phenolic acids	Phenolic acids	102-32-9	B	157300	34407	67755	44769	19517	22611	1.01466	0.334912	-1.57814	down
mws0009	C10H10O3	Coniferaldehyde	Phenolic acids	Phenolic acids	20649-42-7	B	52775	66320	72851	222170	137620	203960	1.37147	2.93702	1.55436	up
pmb2795	C10H10O3	4-Methoxycinnamic acid*	Phenolic acids	Phenolic acids	830-09-1	A	263710	379090	272000	162980	180760	96405	1.21778	0.481138	-1.05548	down
mws1195	C10H10O3	p-Coumaric acid methyl ester*	Phenolic acids	Phenolic acids	3943-97-3	A	375080	563560	408650	197190	214700	112490	1.27901	0.389211	-1.36138	down
mws2212	C9H8O4	Caffeic acid	Phenolic acids	Phenolic acids	331-39-5	A	3181200	861590	2263400	488900	401830	410920	1.27931	0.206408	-2.27643	down
Lmrn001951	C9H10O4	(S)-2-Hydroxy-3-(4-Hydroxyphenyl)Propanoic Acid	Phenolic acids	Phenolic acids	23508-35-2	B	4035.3	9465	3714.5	5442.4	7480.1	6949.1	0.514276	1.15433	0.207059	insig
mws1350	C9H10O4	Syringaldehyde; 4-Hydroxy-3,5-Dimethoxybenzaldehyde	Phenolic acids	Phenolic acids	134-96-3	B	9	2407.3	9	8105.6	9	4862.4	0.574619	5.35068	2.41972	insig
Xmgn006542	C10H10O4	Dimethyl Phthalate	Phenolic acids	Phenolic acids	131-11-3	B	80179	107770	101380	37917	31310	24238	1.38339	0.323041	-1.63021	down
mws0014	C10H10O4	Ferulic acid	Phenolic acids	Phenolic acids	537-98-4	A	21064000	5506400	12873000	4419000	2350600	2244300	1.22272	0.228527	-2.12956	down
Lmdn003756	C10H10O4	Methyl caffeate	Phenolic acids	Phenolic acids	3843-74-1	A	129220	91156	86142	1831400	1789400	1190500	1.43355	15.6966	3.97238	up
pmb2497	C9H10O5	4-Hydroxy-3-methoxymandelate	Phenolic acids	Phenolic acids	55-10-7	B	219250	148730	210010	198380	193810	183930	0.0449589	0.996765	-0.00467519	insig
mws0027	C9H10O5	Syringic acid	Phenolic acids	Phenolic acids	530-57-4	B	6898.4	4162.1	1488.2	9	9	4484.3	1.00352	0.358786	-1.4788	down
pmb1587	C13H18O2	4-Hydroxy-3,5-diisopropylbenzaldehyde	Phenolic acids	Phenolic acids	10537-86-7	B	4794.5	3434	2752.8	5134.5	5378.9	6106.6	1.12736	1.51348	0.597872	insig
Lmln010063	C14H22O	2,6-Di-tert-butylphenol	Phenolic acids	Phenolic acids	128-39-2	A	354840	414640	278900	323950	425670	348210	0.278421	1.04717	0.0664929	insig
mws1212	C11H12O4	Methyl ferulate	Phenolic acids	Phenolic acids	2309-07-1	A	8954800	12695000	9944800	2799000	1183800	1977600	1.37926	0.188652	-2.4062	down
mws2184	C11H12O4	Ethyl caffeate	Phenolic acids	Phenolic acids	102-37-4	B	12029	4594.2	10068	5364.7	5981.1	11774	0.277166	0.866196	-0.207235	insig
pmb2620	C11H12O4	3,4-Dimethoxycinnamic acid	Phenolic acids	Phenolic acids	14737-89-4	A	4325900	6172900	5048200	1403900	517820	1098800	1.35804	0.194283	-2.36377	down
pme3443	C11H12O4	Sinapinaldehyde	Phenolic acids	Phenolic acids	4206-58-0	B	11157	9313.6	9263.5	23200	19886	22774	1.4127	2.21497	1.14728	up
mws0853	C11H14O4	Sinapyl alcohol	Phenolic acids	Phenolic acids	537-33-7	B	9	2681.1	1550.5	9980.8	9196.4	15260	1.01924	8.12083	3.02163	up
Lmhn003240	C11H10O6	Benzoylmalic acid	Phenolic acids	Phenolic acids	22138-51-8	A	2173100	1689100	2176100	53632	158990	77186	1.41303	0.047995	-4.38097	down
pmn001669	C12H14O5	Methyl sinapate	Phenolic acids	Phenolic acids	20733-94-2	A	9285.7	20745	8076.9	3299.5	1600.8	2354.5	1.31529	0.190377	-2.39307	down
Lmhn002629	C11H10O7	Benzoyltartaric acid	Phenolic acids	Phenolic acids	-	B	9	9	9	403020	740570	695590	1.44465	68117.8	16.0557	up
Lmhn003373	C11H10O7	p-Hydroxybenzoylmalic acid	Phenolic acids	Phenolic acids	-	B	689170	396010	550790	12438	56891	18604	1.37901	0.0537498	-4.2176	down
pmp000087	C13H16O6	2-Feruloyl-sn-glycerol	Phenolic acids	Phenolic acids	-	A	7544900	7150000	5200700	4390200	3697700	5892000	1.04493	0.702663	-0.509095	insig
pmp000086	C13H16O6	1-Feruloyl-sn-glycerol	Phenolic acids	Phenolic acids	-	B	6360400	5439900	6720400	4611500	2227000	5022900	1.01366	0.64044	-0.642864	insig
mws1297	C13H18O6	Benzyl glucoside	Phenolic acids	Phenolic acids	4304-12-5	A	7603.7	6621.1	9555	88000	73386	106790	1.43098	11.2775	3.49537	up
pme3472	C12H16O7	Arbutin	Phenolic acids	Phenolic acids	497-76-7	B	76222	100240	94333	26051	84458	19898	1.01721	0.481571	-1.05418	down
Lmlp012720	C16H22O4	Dibutyl phthalate*	Phenolic acids	Phenolic acids	84-74-2	A	16132000	17617000	13969000	13999000	18741000	35558000	0.625101	1.43128	0.51731	insig
Lmxp011770	C16H22O4	Diisobutyl phthalate*	Phenolic acids	Phenolic acids	84-69-5	A	16304000	17878000	14536000	14265000	18510000	37136000	0.600091	1.43501	0.521065	insig
Lmhn002926	C13H12O7	p-Coumaroylmalic acid	Phenolic acids	Phenolic acids	-	A	3591900	7319400	6834100	5784800	7010200	5787500	0.298529	1.04717	0.0664995	insig
mws1521	C13H18O7	Salicin	Phenolic acids	Phenolic acids	138-52-3	A	192930	128480	161770	239590	412830	171720	0.952571	1.70566	0.770329	insig
Lmhn102068	C13H12O8	2-O-Caffeoylmalic acid	Phenolic acids	Phenolic acids	53755-04-7	B	5472.3	4893.3	5433.4	20778	25131	34136	1.4155	5.06646	2.34098	up
Lmhn001386	C12H12O9	Vnilloyltartaric acid	Phenolic acids	Phenolic acids	-	B	16152	15050	13147	17402	15324	12343	0.0784208	1.01623	0.0232339	insig
Zmhn001926	C13H16O8	1-O-Salicyl-D-glucose	Phenolic acids	Phenolic acids	60517-74-0	A	25315000	13157000	16059000	44886000	45779000	30565000	1.25445	2.22314	1.1526	up
pmb3142	C13H16O8	Salicylic acid-2-O-glucoside	Phenolic acids	Phenolic acids	10366-91-3	A	10306000	7892700	7857700	2515800	5386800	2645600	1.2636	0.404822	-1.30464	down
Zmhn000892	C13H18O8	4-O-Glucosyl-3,4-dihydroxybenzyl alcohol	Phenolic acids	Phenolic acids	-	A	109530	169390	103920	253740	297530	330490	1.34289	2.30321	1.20364	up
Lmhn003074	C14H14O8	Feruloylmalic acid	Phenolic acids	Phenolic acids	-	A	4121200	9946000	9867300	8080900	9438500	7983800	0.351064	1.06554	0.0915866	insig
Lmhn001477	C13H12O9	2-Caffeoyl-L-tartaric acid (Caftaric acid)	Phenolic acids	Phenolic acids	67879-58-7	A	9	9	9	471620	764040	601070	1.4455	68027	16.0538	up
Lmmn002179	C14H18O8	Methyl salicylate-2-O-glucoside	Phenolic acids	Phenolic acids	10019-60-0	B	39987	52622	48385	80562	47082	109100	0.953549	1.67911	0.747694	insig
pmb2871	C13H16O9	1-O-Gentisoyl-D-glucoside*	Phenolic acids	Phenolic acids	23445-11-6	A	482740	457090	497390	598490	1270900	476360	0.826407	1.63214	0.706768	insig
pmn001367	C13H16O9	Protocatechuic acid-4-O-glucoside*	Phenolic acids	Phenolic acids	-	A	254350	250300	271790	442640	889000	292740	1.02956	2.09209	1.06494	up
Hmtn001120	C14H20O8	5-(2-Hydroxyethyl)-2-O-glucosylphenol	Phenolic acids	Phenolic acids	-	A	257410	292060	255340	799750	559210	895860	1.38134	2.80168	1.48629	up
pmb0751	C16H16O7	Trans-5-O-(p-Coumaroyl)shikimate	Phenolic acids	Phenolic acids	-	B	129640	190650	210180	163540	168280	181380	0.0483638	0.967444	-0.04775	insig
Lmhn002140	C14H14O9	Feruloyltartaric acid (Fertaric acid)	Phenolic acids	Phenolic acids	-	B	9	9	9	1888300	2544600	1774700	1.44602	229911	17.8107	up
Zmhn002301	C15H18O8	p-Coumaric acid-4-O-glucoside	Phenolic acids	Phenolic acids	117405-48-8	A	21225000	26435000	27352000	23343000	23240000	29874000	0.105789	1.01926	0.0275272	insig
pmn001690	C16H24O7	3-Hydroxy-4-isopropylbenzylalcohol-3-O-glucoside	Phenolic acids	Phenolic acids	-	B	308340	210730	271680	26697	23466	29140	1.44092	0.100288	-3.31777	down
Lmmn003663	C14H18O9	5-Glucosyloxy-2-Hydroxybenzoic acid methyl ester	Phenolic acids	Phenolic acids	-	B	82981	54811	52246	14838	11824	4918.6	1.33895	0.16618	-2.58918	down
Lmtn002565	C14H18O9	1-O-Vanilloyl-D-Glucose	Phenolic acids	Phenolic acids	-	B	625700	676480	657810	672210	464670	629990	0.656813	0.901469	-0.14965	insig
Zmhn001883	C14H18O9	Vanillic acid-4-O-glucoside	Phenolic acids	Phenolic acids	32142-31-7	B	54340	82784	65934	2519.2	12072	2064.8	1.32834	0.0820258	-3.60778	down
pmn001517	C15H22O8	3,4,5-Trimethoxyphenyl-1-O-Glucoside	Phenolic acids	Phenolic acids	-	B	3469100	2379800	2494600	7722900	4369600	7339000	1.26596	2.32894	1.21967	up
Zmhn001793	C15H18O9	6-O-Caffeoyl-D-glucose	Phenolic acids	Phenolic acids	-	B	12709000	16450000	17630000	11650000	9293800	12401000	1.13684	0.712663	-0.488708	insig
mws0906	C16H22O8	Coniferin	Phenolic acids	Phenolic acids	531-29-3	B	18141000	22970000	26433000	19574000	12867000	18107000	0.949277	0.748371	-0.418174	insig
Lmmn000774	C15H20O9	Dihydrocaffeoylglucose	Phenolic acids	Phenolic acids	-	B	78271	22541	40069	69410	31376	75983	0.393935	1.25474	0.327388	insig
Lmtn000940	C14H18O10	1-O-(3,4-Dihydroxy-5-methoxy-benzoyl)-glucoside	Phenolic acids	Phenolic acids	-	B	35947	49272	36500	108370	109940	121150	1.41714	2.78888	1.47969	up
mws0178	C16H18O9	Chlorogenic acid (3-O-Caffeoylquinic acid)*	Phenolic acids	Phenolic acids	327-97-9	A	154510	23395	17021	12928	4950.1	63905	0.624609	0.41956	-1.25305	insig
mws2108	C16H18O9	Cryptochlorogenic acid (4-O-Caffeoylquinic acid)	Phenolic acids	Phenolic acids	905-99-7	B	129890	13742	11056	7166.1	4448	52329	0.548442	0.413368	-1.2745	insig
pme1816	C16H18O9	Neochlorogenic acid (5-O-Caffeoylquinic acid)*	Phenolic acids	Phenolic acids	906-33-2	A	149660	22966	18018	12161	7773.5	56752	0.632975	0.40225	-1.31384	insig
Zmhn002422	C16H20O9	1-O-Feruloyl-D-Glucose	Phenolic acids	Phenolic acids	-	A	27040000	25892000	23749000	13345000	6199900	13006000	1.27468	0.424498	-1.23617	down
Hmmn002544	C16H20O9	Ferulic acid-4-O-glucoside	Phenolic acids	Phenolic acids	117405-51-3	A	928760	1189800	1056000	85275	83404	156910	1.42486	0.102562	-3.28543	down
Zmhn002334	C16H20O9	6-O-Feruloyl-D-glucose	Phenolic acids	Phenolic acids	137887-25-3	B	4406600	5492900	5283100	1400100	425170	836560	1.35318	0.175321	-2.51193	down
pmb3107	C15H20O10	Glucosyringic Acid	Phenolic acids	Phenolic acids	-	B	25958	49528	35413	48423	43856	90499	0.907601	1.64815	0.720846	insig
pma3724	C17H20O9	1-O-Feruloylquinic acid	Phenolic acids	Phenolic acids	-	B	87917	64612	91646	137450	136080	72589	0.822222	1.4175	0.503353	insig
pmb0752	C17H20O9	3-O-Feruloylquinic acid	Phenolic acids	Phenolic acids	1899-29-2	B	62625	88003	78115	190280	143250	146390	1.36692	2.09808	1.06907	up
Lmbp002309	C17H22O9	Sinapaldehyde-4-O-Glucoside	Phenolic acids	Phenolic acids	154461-65-1	B	19830	13561	6445.5	160910	88045	149900	1.37013	10.0123	3.3237	up
pmn001695	C16H20O10	Trihydroxycinnamoylquinic acid	Phenolic acids	Phenolic acids	-	B	44838	42162	33975	171110	108660	169080	1.39156	3.71027	1.89152	up
mws0011	C17H24O9	Syringin	Phenolic acids	Phenolic acids	118-34-3	B	39764	29988	12950	186660	29046	111180	0.977629	3.95258	1.98279	insig
Zmhn002227	C17H22O10	4-O-Glucosyl-sinapate	Phenolic acids	Phenolic acids	-	B	5372.6	11401	3562.7	18931	10522	20092	1.11659	2.43628	1.28468	up
pmb2940	C17H22O10	1-O-Glucosyl sinapate	Phenolic acids	Phenolic acids	78185-48-5	B	849110	1484500	1071800	360380	271890	289390	1.38402	0.270646	-1.88552	down
HJN003	C17H22O10	1-O-Sinapoyl-D-glucose	Phenolic acids	Phenolic acids	-	B	309000	445720	282110	263690	213610	318250	0.844037	0.767291	-0.382155	insig
Lmmp010562	C24H38O4	Diisooctyl Phthalate	Phenolic acids	Phenolic acids	27554-26-3	B	895380	271360	473590	435710	225160	248800	0.799425	0.554565	-0.850571	insig
Cmjn004337	C18H26O10	Benzyl-(2''-O-xylosyl)glucoside	Phenolic acids	Phenolic acids	-	B	26861	48696	41411	54581	46129	53733	0.93296	1.32039	0.400961	insig
Lmtn002324	C19H28O11	Benzyl-(2''-O-glucosyl)glucoside	Phenolic acids	Phenolic acids	-	B	18717	20124	21729	23131	21940	15929	0.0112616	1.0071	0.0102058	insig
pmb2654	C19H27NO12	Anthranilate-1-O-Sophoroside	Phenolic acids	Phenolic acids	-	B	50562	101730	79732	152810	195730	481090	1.18718	3.57562	1.83819	up
Zmhn002508	C21H28O12	4-p-Cumaroyl-rhamnosyl-(1→6)-D-glucose	Phenolic acids	Phenolic acids	-	B	14034	15857	16776	9058.8	26787	16791	0.0745212	1.12792	0.173669	insig
Zmhn004909	C21H18O13	3,4-Digalloylshikimic acid	Phenolic acids	Phenolic acids	-	B	91751	133920	109720	96778	85690	68971	0.978653	0.749689	-0.415636	insig
Lmnn002886	C23H26O11	1'-O-(3,4-Dihydroxyphenethyl)-O-caffeoyl-glucoside	Phenolic acids	Phenolic acids	-	B	27182000	30744000	26740000	20775000	22972000	17247000	1.23703	0.720407	-0.473115	insig
pmb3072	C22H26O12	3-O-p-Coumaroylshikimic acid-O-glucoside	Phenolic acids	Phenolic acids	-	B	31397	52493	40082	16307	18117	18575	1.34827	0.427508	-1.22598	down
pmn001707	C30H46O5	Quillaic acid	Phenolic acids	Phenolic acids	631-01-6	B	826390	548570	1282000	709650	606650	278150	0.809684	0.600103	-0.736718	insig
Zmhn000785	C19H32O16	Di-O-Glucosylquinic acid	Phenolic acids	Phenolic acids	-	A	71300	124420	76038	103250	176140	145900	1.01977	1.56496	0.646124	insig
Hmbn002692	C22H30O14	6'-O-Feruloyl-D-sucrose	Phenolic acids	Phenolic acids	118230-77-6	B	690060	514070	568010	280350	204800	363650	1.31356	0.478969	-1.062	down
pmb0824	C25H28O13	Syringic acid-4-O-(6''-feruloyl)glucoside	Phenolic acids	Phenolic acids	-	B	157590	163950	171920	39160	10231	20347	1.35856	0.141325	-2.82292	down
Hmln002149	C29H36O15	Acteoside	Phenolic acids	Phenolic acids	61276-17-3	B	10562	8530.2	6505.6	5794.1	4438.3	9217.5	0.766385	0.759827	-0.396257	insig
mws1506	C29H36O16	Plantamajoside	Phenolic acids	Phenolic acids	104777-68-6	B	10630	14641	13267	24271	22746	19816	1.35511	1.73421	0.794279	insig
pme3200	C2H7N3	1-methylguanidine	Nucleotides and derivatives	Nucleotides and derivatives	471-29-4	B	40113	27467	26454	9	9	9	1.44576	0.00028713	-11.766	down
mws0255	C4H5N3O	Cytosine	Nucleotides and derivatives	Nucleotides and derivatives	71-30-7	B	10215000	4088000	4845300	645670	2018100	787670	1.28792	0.180248	-2.47195	down
pme0257	C4H4N2O2	Uracil	Nucleotides and derivatives	Nucleotides and derivatives	66-22-8	A	99523	135080	124040	122910	182520	220150	0.981396	1.46547	0.551362	insig
mws0251	C5H6N2O2	Thymine	Nucleotides and derivatives	Nucleotides and derivatives	65-71-4	B	17537	12692	18300	14559	21995	13386	0.0739171	1.02908	0.0413487	insig
pmb0374	C5H5N5	2-Aminopurine	Nucleotides and derivatives	Nucleotides and derivatives	452-06-2	A	50306	29486	75818	145340	141020	94307	1.21578	2.44629	1.29059	up
pme0040	C5H5N5	Adenine	Nucleotides and derivatives	Nucleotides and derivatives	73-24-5	A	70529000	27141000	49927000	8318200	9646500	5941000	1.36472	0.161966	-2.62624	down
pme0033	C5H4N4O	Hypoxanthine	Nucleotides and derivatives	Nucleotides and derivatives	68-94-0	B	97997	124040	73575	380170	375290	458260	1.40799	4.10579	2.03766	up
mws0847	C6H7N5	1-Methyladenine	Nucleotides and derivatives	Nucleotides and derivatives	5142-22-3	B	99718	84935	130000	116120	70184	104310	0.326634	0.923602	-0.114657	insig
pme0183	C5H5N5O	Isoguanine	Nucleotides and derivatives	Nucleotides and derivatives	3373-53-3	B	396720	181380	248460	170510	151340	130430	1.10531	0.547184	-0.869903	insig
pme1109	C5H5N5O	Guanine	Nucleotides and derivatives	Nucleotides and derivatives	73-40-5	A	1895200	475940	1031000	82685	141760	124000	1.35125	0.102419	-3.28744	down
pme0256	C5H4N4O2	Xanthine	Nucleotides and derivatives	Nucleotides and derivatives	69-89-6	A	31493	28071	27932	49268	50691	25160	0.828973	1.43	0.516012	insig
mws1641	C6H4N4O2	Lumazine	Nucleotides and derivatives	Nucleotides and derivatives	487-21-8	B	17590	10339	8942.4	13620	10108	8285.6	0.3361	0.86825	-0.203817	insig
pmc0274	C6H6N4S	6-Methylmercaptopurine	Nucleotides and derivatives	Nucleotides and derivatives	50-66-8	B	12305000	12559000	13920000	34059000	20445000	14555000	1.05478	1.78061	0.832368	insig
mws0863	C5H11O7P	2-Deoxyribose-5'-phosphate	Nucleotides and derivatives	Nucleotides and derivatives	102916-66-5	B	24454	35059	21968	19409	31748	18461	0.480498	0.854408	-0.227003	insig
pmb2507	C5H11O7P	2-Deoxyribose-1-phosphate	Nucleotides and derivatives	Nucleotides and derivatives	17210-42-3	B	380930	101900	185610	188420	181660	149800	0.229057	0.777751	-0.362619	insig
pme1194	C9H13N3O4	2'-Deoxycytidine	Nucleotides and derivatives	Nucleotides and derivatives	951-77-9	B	35035	20425	31932	18374	29529	12420	0.798929	0.690258	-0.534793	insig
pme0264	C10H14N2O5	Thymidine	Nucleotides and derivatives	Nucleotides and derivatives	50-89-5	B	189790	110100	129060	70421	101810	60149	1.16387	0.541741	-0.884324	insig
pme3732	C9H13N3O5	Cytidine	Nucleotides and derivatives	Nucleotides and derivatives	65-46-3	B	1373500	407380	699770	300100	358450	277980	1.12036	0.377534	-1.40532	down
ML10180524	C9H13N3O5	Cytarabine	Nucleotides and derivatives	Nucleotides and derivatives	147-94-4	B	724260	212250	551610	151450	247660	144390	1.08496	0.365226	-1.45314	down
mws0248	C9H12N2O6	Uridine	Nucleotides and derivatives	Nucleotides and derivatives	58-96-8	A	1840000	302320	873320	313570	347080	121400	1.00727	0.259331	-1.94713	down
pme3961	C10H13N5O3	2'-Deoxyadenosine	Nucleotides and derivatives	Nucleotides and derivatives	958-09-8	A	299520	125110	164360	182630	205030	113820	0.278982	0.851424	-0.232051	insig
pme1187	C10H14N2O6	5-Methyluridine	Nucleotides and derivatives	Nucleotides and derivatives	1463-10-1	B	4167.9	2384.1	2689.9	1845	3549.1	1895.3	0.612087	0.788734	-0.342389	insig
pme1184	C10H13N5O4	2'-Deoxyguanosine	Nucleotides and derivatives	Nucleotides and derivatives	961-07-9	B	334470	216770	266950	178770	137970	224070	1.10264	0.660983	-0.597314	insig
pme0230	C10H13N5O4	Adenosine	Nucleotides and derivatives	Nucleotides and derivatives	58-61-7	A	825350	370120	688850	1381300	1325900	774580	1.04216	1.84776	0.885781	insig
mws1060	C10H12N4O5	9-(Arabinosyl)hypoxanthine	Nucleotides and derivatives	Nucleotides and derivatives	7013-16-3	A	118530	92488	93084	270140	282670	103280	1.04474	2.15747	1.10934	up
Hmhp001812	C11H15N5O4	2'-O-Methyladenosine	Nucleotides and derivatives	Nucleotides and derivatives	2140-79-6	A	386510	58434	124840	39254	52603	40637	1.06368	0.232534	-2.10449	down
pme3350	C10H13N5O5	8-Hydroxy-2-deoxyguanosine	Nucleotides and derivatives	Nucleotides and derivatives	88847-89-6	B	9	9	9	9	9	3890	0.616932	144.741	7.17733	insig
pme1178	C10H13N5O5	Guanosine	Nucleotides and derivatives	Nucleotides and derivatives	118-00-3	A	27458000	8689700	15399000	6989200	7708600	3033000	1.09568	0.343975	-1.53962	down
mws0668	C10H12N4O6	Xanthosine	Nucleotides and derivatives	Nucleotides and derivatives	146-80-5	A	860790	640380	780200	1172800	1316300	555350	0.565077	1.33448	0.416281	insig
Lmqp000329	C8H14N3O7P	5-Aminoimidazole ribonucleotide	Nucleotides and derivatives	Nucleotides and derivatives	25635-88-5	A	210880	338530	236180	75364	159300	35556	1.13696	0.343971	-1.53964	down
pme1474	C11H15N5O3S	5'-Deoxy-5'-(methylthio)adenosine	Nucleotides and derivatives	Nucleotides and derivatives	2457-80-9	A	6823900	8385300	5995100	3378200	4235400	3802100	1.34481	0.538367	-0.893338	insig
pmb0197	C11H15N5O5	N7-Methylguanosine	Nucleotides and derivatives	Nucleotides and derivatives	20244-86-4	B	47529	45523	50382	63829	54413	54822	1.2181	1.20658	0.270919	insig
pme3967	C12H17N5O5	2-(Dimethylamino)guanosine	Nucleotides and derivatives	Nucleotides and derivatives	2140-67-2	B	127450	97781	103840	150360	114240	111100	0.656478	1.1417	0.191182	insig
pme3174	C9H14N3O8P	Cytidine 5'-monophosphate(Cytidylic acid)	Nucleotides and derivatives	Nucleotides and derivatives	63-37-6	B	299290	33584	139370	52955	23369	47187	0.90476	0.261541	-1.93489	insig
pme3188	C9H13N2O9P	Uridine 5'-monophosphate	Nucleotides and derivatives	Nucleotides and derivatives	58-97-9	B	1457200	107470	392570	25593	13918	40518	1.26666	0.0408887	-4.61215	down
mws0884	C10H12N5O6P	Cyclic 3',5'-Adenylic acid	Nucleotides and derivatives	Nucleotides and derivatives	60-92-4	A	73663	38466	62889	187400	183510	100610	1.25862	2.69412	1.42982	up
pme3184	C10H14N5O6P	2'-Deoxyadenosine-5'-monophosphate	Nucleotides and derivatives	Nucleotides and derivatives	653-63-4	A	228070	313250	335140	216120	273280	291400	0.492243	0.890856	-0.166735	insig
mws0675	C11H15N2O8P	β-Nicotinamide mononucleotide	Nucleotides and derivatives	Nucleotides and derivatives	1094-61-7	B	647470	234920	559410	214550	124040	74499	1.1832	0.286509	-1.80335	down
mws0609	C10H12N5O7P	Guanosine 3',5'-cyclic monophosphate	Nucleotides and derivatives	Nucleotides and derivatives	7665-99-8	A	178240	60133	136130	67850	60992	83486	0.861494	0.566959	-0.818683	insig
pmb0981	C10H14N5O7P	Adenosine 5'-monophosphate	Nucleotides and derivatives	Nucleotides and derivatives	61-19-8	A	3634800	2777600	7036000	4889200	4131100	8375100	0.531359	1.29349	0.371271	insig
mws0874	C10H14N5O7P	3'-Adenylic Acid	Nucleotides and derivatives	Nucleotides and derivatives	84-21-9	A	44734	23557	42691	21046	20983	20637	1.15514	0.56465	-0.824571	insig
pmb0998	C10H14N5O8P	Guanosine 5'-monophosphate	Nucleotides and derivatives	Nucleotides and derivatives	85-32-5	A	533200	106960	373760	60168	59868	84534	1.19855	0.201761	-2.30928	down
pmb0964	C16H23N5O5	Isopentenyladenine-7-N-glucoside	Nucleotides and derivatives	Nucleotides and derivatives	-	B	10033	19949	17789	25616	20844	61579	0.979194	2.2616	1.17735	insig
pme3337	C14H17N5O8	Succinyladenosine	Nucleotides and derivatives	Nucleotides and derivatives	4542-23-8	A	1076200	841200	745700	982260	1606400	641880	0.354158	1.21307	0.278669	insig
pme3007	C9H14N2O12P2	Uridine 5'-diphosphate	Nucleotides and derivatives	Nucleotides and derivatives	27821-45-0	A	111270	37683	121570	60827	47149	33704	0.810812	0.523726	-0.933115	insig
pme2117	C10H15N5O10P2	Adenosine 5'-diphosphate	Nucleotides and derivatives	Nucleotides and derivatives	58-64-0	A	402390	218120	468650	267860	160540	217850	0.977057	0.593347	-0.753052	insig
Zmfn000481	C14H22N2O16P2	Uridine-5'-Diphosphate-D-Xylose	Nucleotides and derivatives	Nucleotides and derivatives	3616-06-6	B	404230	326290	367780	246100	290670	153310	1.10658	0.628316	-0.670437	insig
pmb2922	C15H24N2O17P2	Uridine 5'-diphospho-D-glucose	Nucleotides and derivatives	Nucleotides and derivatives	133-89-1	A	1442800	1631400	1603600	1903400	1626800	1345100	0.251228	1.04222	0.0596608	insig
pmb0530	C21H27N7O14P2	Nicotinic acid adenine dinucleotide	Nucleotides and derivatives	Nucleotides and derivatives	53-84-9	A	2433400	3373600	3287900	2879000	3315900	2590600	0.126682	0.965981	-0.0499334	insig
pme2651	C21H28N7O17P3	NADP (Nicotinamide adenine dinucleotide phosphate)	Nucleotides and derivatives	Nucleotides and derivatives	53-59-8	B	582450	478780	842650	488350	401650	605420	0.725678	0.785459	-0.348392	insig
pme2746	C27H33N9O15P2	Riboflavin 5'-Adenosine Diphosphate	Nucleotides and derivatives	Nucleotides and derivatives	146-14-5	A	1812300	1852000	1973300	2158800	1773900	2497500	0.718056	1.14059	0.189782	insig
mws1175	C16H14O4	Pinostrobin	Flavonoids	Dihydroflavone	480-37-5	B	1446.4	3270.7	4163.3	4333.1	2063.5	2501.8	0.0970261	1.00203	0.00292129	insig
pme0376	C15H12O5	Naringenin (5,7,4'-Trihydroxyflavanone)	Flavonoids	Dihydroflavone	480-41-1	A	48556	51882	57019	18388	20735	13433	1.39459	0.33378	-1.58303	down
mws0051	C16H12O5	Acacetin	Flavonoids	Flavonoid	480-44-4	B	275940	1070500	948950	141540	554040	268080	0.837952	0.419824	-1.25214	insig
mws0129	C16H12O5	Genkwanin (Apigenin 7-methyl ether)	Flavonoids	Flavonoid	437-64-9	B	269920	1071500	905940	145820	545080	260950	0.832664	0.423541	-1.23943	insig
mws1068	C15H10O6	Kaempferol (3,5,7,4'-Tetrahydroxyflavone)	Flavonoids	Flavonols	520-18-3	A	421150	329740	435890	53857	117310	39156	1.34863	0.177222	-2.49637	down
mws1094	C15H12O6	Aromadendrin (Dihydrokaempferol)	Flavonoids	Dihydroflavonol	480-20-6	B	5844	7158.2	7544.7	1860.7	6093.9	3375.9	1.01411	0.551446	-0.858709	insig
pmp000001	C16H12O6	Hispidulin (5,7,4'-Trihydroxy-6-methoxyflavone)	Flavonoids	Flavonoid	1447-88-7	B	17722	14977	14103	30075	7859.8	7329.4	0.377508	0.967142	-0.0481997	insig
pme2954	C15H10O7	Quercetin	Flavonoids	Flavonols	117-39-5	A	896420	700820	811360	155420	205590	149960	1.42717	0.212144	-2.23688	down
Cmsp004086	C16H14O6	Dihydrokaempferide	Flavonoids	Flavonols	137225-59-3	B	308620	179310	360430	221780	307640	194990	0.373593	0.853895	-0.22787	insig
mws0044	C15H12O7	Dihydroquercetin(Taxifolin)	Flavonoids	Dihydroflavonol	480-18-2	B	19018	34956	44948	44609	62399	28313	0.650227	1.36796	0.452022	insig
mws1174	C17H14O6	3-O-Acetylpinobanksin	Flavonoids	Dihydroflavonol	52117-69-8	A	312.58	12459	22017	27003	9	9	0.718982	0.77672	-0.364533	insig
mws0066	C16H12O7	Isorhamnetin	Flavonoids	Flavonols	480-19-3	A	2503700	1857300	2068800	81308	176130	51038	1.40195	0.047976	-4.38154	down
Lmmn004912	C16H12O7	3-O-Methylquercetin	Flavonoids	Flavonols	1486-70-0	B	2381.7	5810.8	3369.5	9059.6	5923.5	18029	1.11042	2.85522	1.5136	up
Lmbp003668	C20H18O10	Kaempferol-3-O-arabinoside	Flavonoids	Flavonoid	-	B	2570200	1208600	1439700	34838	231450	23901	1.31584	0.0556077	-4.16857	down
mws0919	C21H20O10	Kaempferol-3-O-rhamnoside (Afzelin)	Flavonoids	Flavonols	482-39-3	A	77962	39973	45821	9	14293	2277.1	1.0156	0.101243	-3.30411	down
pme0321	C21H20O10	Kaempferol-7-O-rhamnoside	Flavonoids	Flavonols	20196-89-8	B	22741	17810	16309	2351.2	12535	2499.6	1.14939	0.305765	-1.7095	down
mws2186	C20H18O11	Avicularin(Quercetin-3-O-α-L-arabinofuranoside)	Flavonoids	Flavonols	572-30-5	A	2845600	1712200	1764000	326780	666670	272340	1.34551	0.200226	-2.3203	down
Lmdp003509	C20H18O11	Quercetin-3-O-xyloside (Reynoutrin)	Flavonoids	Flavonols	549-32-6	B	4106100	683850	2592100	419060	943140	416500	1.05406	0.240949	-2.0532	down
HJN087	C21H22O10	Naringenin-4'-O-glucoside	Flavonoids	Flavonoid	-	B	100740	66039	73940	26592	38437	22401	1.34085	0.363204	-1.46115	down
mws1179	C21H22O10	Naringenin-7-O-glucoside (Prunin)	Flavonoids	Dihydroflavone	529-55-5	B	23663	22159	13517	25834	19291	26624	0.642097	1.20914	0.273978	insig
HJN055	C21H24O10	Dihydrocharcone-4'-O-glucoside	Flavonoids	Chalcones	-	A	409070	549750	435850	326840	359760	394930	1.09963	0.775474	-0.36685	insig
mws2118	C21H24O10	Phloretin-2'-O-glucoside (Phlorizin)	Flavonoids	Chalcones	60-81-1	A	230170	266730	202950	189780	181830	176100	1.18355	0.782611	-0.353634	insig
Hmcp002316	C21H20O11	Isorhamnetin-3-O-arabinoside	Flavonoids	Flavonols	-	A	8535900	6706200	5327000	160740	912930	108090	1.33024	0.0574532	-4.12147	down
mws2209	C21H20O11	Kaempferol-3-O-glucoside (Astragalin)	Flavonoids	Flavonols	480-10-4	B	4500500	3289500	4924000	838540	1912000	536930	1.26677	0.258571	-1.95137	down
Xmyp005654	C21H20O11	Kaempferol-4'-O-glucoside	Flavonoids	Flavonoid	-	A	760110	658390	708080	456850	2443100	407300	0.125887	1.5552	0.637097	insig
mws0045	C21H20O11	Quercetin-3-O-rhamnoside(Quercitrin)	Flavonoids	Flavonols	522-12-3	B	383920	235480	303030	41896	60604	29571	1.39797	0.143177	-2.80413	down
Hmpp003270	C21H20O11	Luteolin-4'-O-glucoside	Flavonoids	Flavonoid	6920-38-3	A	6033700	5304400	5030700	889790	2204300	657530	1.30458	0.229193	-2.12536	down
mws0913	C21H20O11	Kaempferol-3-O-galactoside (Trifolin)	Flavonoids	Flavonols	23627-87-4	B	120950	93007	77013	50685	164900	54817	0.35422	0.929312	-0.105765	insig
Lmlp003531	C21H20O11	Luteolin-3'-O-glucoside	Flavonoids	Flavonoid	5154-41-6	A	7573800	5130000	5543200	744970	1873300	613250	1.33812	0.177099	-2.49737	down
pme2459	C21H20O11	Luteolin-7-O-glucoside (Cynaroside)	Flavonoids	Flavonoid	5373-11-5	A	165020	195660	163810	1067100	4062800	1148700	1.35869	11.9709	3.58146	up
HJN086	C21H22O11	Eriodictyol-3'-O-glucoside	Flavonoids	Dihydroflavone	-	B	17047	22312	27933	30650	6638.7	23886	0.381379	0.909093	-0.1375	insig
Lmtn002796	C21H22O11	Aromadendrin-7-O-glucoside	Flavonoids	Flavonoid	28189-90-4	B	136850	150210	157000	80780	94139	86709	1.40558	0.589173	-0.763238	insig
mws0057	C21H22O11	Eriodictyol-7-O-glucoside	Flavonoids	Dihydroflavone	38965-51-4	B	5849	3157	6190.5	17962	79544	35861	1.30681	8.77617	3.13359	up
Lmmn004625	C21H22O11	Dihydrokaempferol-7-O-glucoside	Flavonoids	Flavonols	-	B	16829	7608.8	7224.8	9	9	9	1.4432	0.000852741	-10.1956	down
HJN041	C21H24O11	Epicatechin glucoside	Flavonoids	Flavanols	-	B	13388	15035	10137	7648.5	11300	9222.1	0.997134	0.730565	-0.452915	insig
Lmzn001894	C21H18O12	Kaempferol-3-O-glucuronide	Flavonoids	Flavonols	22688-78-4	A	941510	896300	837320	387310	606790	416200	1.31964	0.527189	-0.923607	insig
mws4167	C21H18O12	Luteolin-7-O-glucuronide	Flavonoids	Flavonoid	29741-10-4	A	3330800	2653000	2945900	1368600	1799200	1457700	1.37787	0.517991	-0.949002	insig
Lmmp003767	C21H18O12	Kaempferol-7-O-glucuronide	Flavonoids	Flavonols	-	B	407370	431510	736080	9989500	13857000	10204000	1.43407	21.6199	4.43429	up
Hmcp002539	C22H22O11	Isorhamnetin-3-O-rhamnoside	Flavonoids	Flavonols	-	B	2863200	2458000	1866900	43338	157260	17147	1.3606	0.0302924	-5.0449	down
pmp000579	C22H22O11	Diosmetin-7-O-galactoside	Flavonoids	Flavonoid	-	A	496720	496910	487800	245190	300170	413350	1.21993	0.647152	-0.627824	insig
mws1329	C21H20O12	Quercetin-7-O-glucoside*	Flavonoids	Flavonols	491-50-9	A	404890	522730	367450	291680	553570	428160	0.120762	0.983275	-0.0243331	insig
mws0091	C21H20O12	Quercetin-3-O-glucoside (Isoquercitrin)*	Flavonoids	Flavonols	482-35-9	A	787620	909670	647090	623740	1055900	621530	0.123532	0.981569	-0.0268389	insig
mws0061	C21H20O12	Quercetin-3-O-galactoside (Hyperin)	Flavonoids	Flavonols	482-36-0	A	914220	1417200	987530	827570	1998500	1184300	0.364659	1.20832	0.273008	insig
Lmdp003286	C21H20O12	Isohyperoside	Flavonoids	Flavonols	35589-21-0	A	6392800	6172000	5505500	4447700	7794200	5550300	0.16263	0.98461	-0.0223755	insig
Lmzp002365	C22H24O11	Hesperetin-7-O-glucoside	Flavonoids	Flavonoid	31712-49-9	B	5949700	3315500	9	511460	612580	445710	0.35247	0.169424	-2.56129	insig
pme1598	C22H24O11	Hesperetin-5-O-glucoside	Flavonoids	Dihydroflavonol	69651-80-5	B	616920	870620	623480	530540	968680	664790	0.0452732	1.0251	0.0357669	insig
Xmsn002700	C21H22O12	Taxifolin-3'-O-glucoside	Flavonoids	Flavonoid	31106-05-5	B	20852	24506	19189	15412	21215	14548	0.930175	0.792833	-0.334911	insig
pmp000583	C22H20O12	Diosmetin-7-O-glucuronide	Flavonoids	Flavonoid	35110-20-4	B	906060	610900	671160	936910	1392900	269660	0.00136685	1.18799	0.248526	insig
Lmmp003783	C21H18O13	Quercetin-3-O-glucuronide	Flavonoids	Flavonols	22688-79-5	B	9	9	9	3355000	5389100	4274100	1.4456	482156	18.8791	up
Lmfn003760	C21H18O13	Quercetin-4′-O-glucuronide	Flavonoids	Flavonols	201463-36-7	A	3884200	3819400	3277000	2503900	2644300	2027100	1.30591	0.653452	-0.613846	insig
Hmjp003123	C21H18O13	Quercetin-5-O-glucuronide	Flavonoids	Flavonols	-	B	11934000	10114000	9314300	7848600	6085900	5736600	1.28628	0.627221	-0.672954	insig
Lmjp003044	C22H22O12	Isorhamnetin-3-O-Glucoside*	Flavonoids	Flavonols	5041-82-7	A	12148000	12687000	10450000	1548900	7953100	1102300	1.12902	0.300533	-1.73441	down
Hmcp002207	C22H22O12	Isorhamnetin-7-O-glucoside (Brassicin)*	Flavonoids	Flavonols	6743-96-0	A	11732000	12408000	9892200	1449400	8622200	1106000	1.09199	0.328442	-1.60629	down
Lmmn003398	C23H22O12	Kaempferol-3-O-(6''-acetyl)glucoside	Flavonoids	Flavonols	-	B	28884	23182	22602	3835.4	122270	6774.5	0.323137	1.77961	0.831561	insig
HJAP135	C24H24O12	Pinocembrin-7-O-(6''-O-malonyl)glucoside	Flavonoids	Flavonoid	-	A	2765800	3019500	2938100	478060	2302900	634510	1.1069	0.39153	-1.35281	down
Hmln002199	C23H22O13	Quercetin-3-O-(6''-acetyl)galactoside	Flavonoids	Flavonols	-	B	29197	29987	26805	7365.7	67638	5893.7	0.563813	0.940788	-0.0880588	insig
Li512111	C24H24O13	Isorhamnetin-3-O-(6''-acetylglucoside)	Flavonoids	Flavonols	-	B	55913	76793	64429	9	30461	9	1.07078	0.15461	-2.6933	down
pmp000587	C24H22O14	Luteolin-7-O-(6''-malonyl)glucoside	Flavonoids	Flavonoid	-	A	9	2258.5	2261.3	9	9	9	1.0051	0.00596184	-7.39003	down
Lmdp004892	C24H22O14	Kaempferol-3-O-(6''-malonyl)galactoside	Flavonoids	Flavonols	-	A	390930	378880	407810	28795	1320900	42974	0.623267	1.18261	0.241978	insig
pmb0608	C25H24O14	Chrysoeriol-7-O-(6''-malonyl)glucoside	Flavonoids	Flavonoid	-	A	21429	18595	20719	7539.2	76762	15857	0.0500223	1.64888	0.72149	insig
Hmln002189	C24H22O15	Quercetin-3-O-(6''-malonyl)galactoside	Flavonoids	Flavonols	-	A	50638	60414	43049	18505	196880	13633	0.245286	1.48616	0.571585	insig
HJAP064	C25H24O15	Isorhamnetin-3-O-(6''-malonylglucoside)	Flavonoids	Flavonoid	-	B	311220	291540	279590	18145	332030	34330	0.959377	0.435774	-1.19835	insig
Lmmp003306	C25H26O15	Quercetin-3-O-xylosyl(1→2)arabinoside	Flavonoids	Flavonols	-	A	1749400	1498700	1232900	1452400	1039500	1271300	0.776642	0.839813	-0.251861	insig
Zmxp005470	C26H26O15	Tricin-7-O-(6''-O-malonyl)glucoside	Flavonoids	Flavonoid	-	B	9	9	9	7089.2	4198.4	20910	1.42756	1192.5	10.2198	up
mws0047	C27H30O14	Apigenin-7-O-neohesperidoside (Rhoifolin)	Flavonoids	Flavonoid	17306-46-6	B	60804	49385	54581	17405	45029	19214	1.13435	0.495527	-1.01296	down
Lmnp002741	C27H30O14	Genkwanin-6-C-(2''-O-apiosyl)glucoside	Flavonoids	Flavonoid carbonoside	-	B	146400	175820	122470	18935	24944	18109	1.42667	0.139396	-2.84274	down
HJAP148	C26H28O15	Kaempferol-3-O-sambubioside	Flavonoids	Flavonoid	27661-51-4	A	734430	921880	965810	978140	904230	1788500	0.75633	1.39996	0.485388	insig
Hmgp003641	C28H32O14	Chrysoeriol-6-C-rhamnoside-7-O-rhamnoside	Flavonoids	Flavonoid	-	B	36602	83414	70771	57564	42199	100020	0.0735412	1.04715	0.066471	insig
pmp001288	C28H32O14	Acacetin-7-O-rutinoside (Linarin)	Flavonoids	Flavonoid	480-36-4	A	1298300	2763700	2393800	1925200	1319900	3379700	0.00896615	1.02618	0.037281	insig
mws1290	C30H26O13	Kaempferol-3-O-(6''-p-Coumaroyl)glucoside (Tiliroside)	Flavonoids	Flavonols	20316-62-5	B	45738	60313	58841	86115	13976	109650	0.0981457	1.27199	0.347088	insig
Hmjn004446	C30H26O13	Luteolin-7-O-(6''-caffeoyl)rhamnoside	Flavonoids	Flavonoid	-	B	500750	480690	465450	43052	150390	73694	1.33938	0.184628	-2.43731	down
Lmsp004670	C27H30O15	Kaempferol-3-O-glucoside-7-O-rhamnoside	Flavonoids	Flavonols	-	A	317260	461780	539190	623410	969740	781200	1.20715	1.80117	0.848931	insig
pmp001079	C27H30O15	Luteolin-7-O-neohesperidoside (Lonicerin)*	Flavonoids	Flavonoid	25694-72-8	A	9193.2	14448	3775.7	53170	156040	48280	1.30816	9.39165	3.23138	up
pmp000593	C27H30O15	Luteolin-7-O-rutinoside*	Flavonoids	Flavonoid	3563-98-2	A	81157	95822	112230	647920	1807900	522660	1.37014	10.2987	3.36439	up
Lmjp002867	C27H30O15	Kaempferol-3-O-neohesperidoside*	Flavonoids	Flavonols	32602-81-6	A	320770	486920	555020	710610	1014700	856510	1.2536	1.89462	0.92191	insig
Lmsn002815	C27H30O15	Kaempferol-3-O-rutinoside(Nicotiflorin)*	Flavonoids	Flavonoid	17650-84-9	A	496360	739770	972130	1365500	2090200	2504400	1.27704	2.699	1.43243	up
Zmcp003989	C27H30O15	Kaempferol-3-O-rhamnosyl(1→2)glucoside	Flavonoids	Flavonoid	-	A	8299.6	6830.3	1016.9	44181	67839	34199	1.26301	9.0556	3.17881	up
Lmjp002596	C26H28O16	Quercetin-3-O-sambubioside	Flavonoids	Flavonols	83048-35-5	A	752730	858200	868650	1083400	1837200	1204200	1.20189	1.66351	0.734228	insig
Lmtp004044	C26H28O16	Quercetin-3-O-apiosyl(1→2)galactoside	Flavonoids	Flavonols	-	B	22354000	18981000	21271000	29638000	33497000	24475000	1.23493	1.39939	0.484795	insig
Hmjp003008	C27H28O16	Luteolin-7-O-glucuronide-5-O-rhamnoside	Flavonoids	Flavonoid	-	A	2691900	2259600	2063300	1885300	2808600	2007200	0.263	0.95528	-0.066004	insig
pmp001080	C28H32O15	Diosmetin-7-O-Neohesperidoside (Neodiosmin)	Flavonoids	Flavonoid	38665-01-9	B	195470	158750	149520	35565	69047	30785	1.34408	0.268783	-1.89548	down
Lmmp003091	C27H30O16	Quercetin-3-O-(4''-O-glucosyl)rhamnoside	Flavonoids	Flavonols	59262-54-3	B	218000	143840	127850	80259	195980	123660	0.536406	0.816637	-0.292233	insig
Lmsp004166	C27H30O16	Quercetin-3-O-glucoside-7-O-rhamnoside	Flavonoids	Flavonols	-	B	2720200	2949600	2995700	2766200	3670500	3090400	0.671007	1.09943	0.136754	insig
mws0059	C27H30O16	Quercetin-3-O-rutinoside (Rutin)	Flavonoids	Flavonols	153-18-4	A	1241300	1333000	1219600	1200600	1268100	1256900	0.37312	0.981997	-0.0262089	insig
Lmbp002336	C27H30O16	Quercetin-3-O-(2''-O-rhamnosyl)galactoside	Flavonoids	Flavonols	-	B	3291700	4704700	4336900	8316000	9330300	9045200	1.39538	2.16418	1.11382	up
Lmjp002461	C27H30O16	Quercetin-3-O-neohesperidoside	Flavonoids	Flavonols	117611-67-3	A	2366000	3221700	3116600	2722000	3642500	2801800	0.306832	1.05308	0.0746112	insig
Lmyn001269	C27H30O16	Kaempferol-3-O-sophoroside	Flavonoids	Flavonoid	19895-95-5	B	592550	396070	564030	1157500	1102400	903600	1.33654	2.03748	1.02679	up
Hmjp002999	C28H32O16	Isorhamnetin-3-O-rutinoside (Narcissin)	Flavonoids	Flavonoid	604-80-8	B	4415900	3733300	4443200	1580000	5634500	1140200	0.784918	0.663472	-0.591893	insig
Zmxp002867	C28H32O16	Chrysoeriol-5,7-di-O-glucoside	Flavonoids	Flavonoid	-	B	194490	134560	214320	78538	88684	191810	0.90573	0.660751	-0.597822	insig
Lmsp004045	C28H32O16	Isorhamnetin-3-O-glucoside-7-O-rhamnoside	Flavonoids	Flavonols	-	A	8974.5	13646	22480	11578	30163	8430	0.066612	1.11243	0.15371	insig
pme1540	C28H32O16	Isorhamnetin-3-O-neohesperidoside	Flavonoids	Flavonols	55033-90-4	A	21845	25916	14656	20545	49565	12666	0.271175	1.32618	0.407274	insig
pmp000596	C27H30O17	Quercetin-3-O-(2''-O-galactosyl)glucoside	Flavonoids	Flavonols	56782-99-1	A	9	9	9	32368	9	36739	1.00552	2559.85	11.3218	up
Lmtp003677	C27H30O17	Quercetin-3-O-sophoroside (Baimaside)	Flavonoids	Flavonols	18609-17-1	B	31677	35542	49400	27636	27135	27068	1.12609	0.701764	-0.510942	insig
Lmsp003729	C27H30O17	Myricetin-3-O-rutinoside	Flavonoids	Flavonols	-	B	76104	148110	113890	311020	273070	445350	1.32823	3.04474	1.60632	up
Hmlp002975	C28H30O17	Isorhamnetin-3-O-glucuronide-7-O-rhamnoside	Flavonoids	Flavonols	-	B	441220	362170	365020	123760	300870	90901	1.13187	0.441224	-1.18042	down
Lmmp002560	C27H28O18	Quercetin-3-O-(2''-O-glucosyl)glucuronide	Flavonoids	Flavonols	-	B	242200	143980	208460	82692	138410	102650	1.18614	0.54445	-0.877127	insig
Hmcp001578	C28H32O17	Isorhamnetin-3,7-O-diglucoside	Flavonoids	Flavonols	6758-51-6	B	62465	74053	69959	9	52571	13502	0.808699	0.320045	-1.64365	insig
Lmmp003266	C29H30O19	Quercetin-3-O-(2''-malonyl)glucoside-7-O-arabinoside	Flavonoids	Flavonols	-	A	43505	41544	48434	17730	228090	46025	0.252147	2.18638	1.12855	insig
Xmyp004678	C32H38O19	Kaempferol-3-O-(2-O-Xylosyl-6-O-Rhamnosyl)Glucoside	Flavonoids	Flavonoid	-	A	13974	13058	9034.8	90046	134400	72358	1.41734	8.22929	3.04077	up
Zmlp003063	C33H40O19	Luteolin-7-O-(2''-O-rhamnosyl)rutinoside	Flavonoids	Flavonoid	-	B	8855.4	7764	10409	54617	83577	35151	1.39546	6.41344	2.6811	up
Lmsp003881	C33H40O19	Kaempferol-3-O-rutinoside-7-O-rhamnoside	Flavonoids	Flavonols	-	A	298620	245850	243490	1986500	3557000	1648700	1.41559	9.12762	3.19024	up
mws1035	C33H40O19	Kaempferol-3-O-robinoside-7-O-rhamnoside (Robinin)	Flavonoids	Flavonols	301-19-9	B	16018	25159	23141	22900	37074	32843	0.985854	1.4431	0.529167	insig
HJAP061	C32H38O20	Quercetin-3-O-(2''-O-arabinosyl)rutinoside	Flavonoids	Flavonols	-	A	2089800	1123500	2271500	1745600	2663100	2473100	0.626923	1.2547	0.327347	insig
Hmcp001618	C32H38O20	Quercetin-3-O-(2''-O-Xylosyl)rutinoside	Flavonoids	Flavonols	129235-39-8	B	47203	30968	43993	47131	60249	48097	0.912823	1.27269	0.347882	insig
Hmqp002870	C32H38O20	Luteolin-7-O-Sophoroside-5-O-arabinoside	Flavonoids	Flavonoid	-	B	5590	11626	10916	81406	161400	54767	1.38128	10.5777	3.40296	up
Lmyp003857	C35H28O19	Kaempferol-3-O-(2'',6''-digalloyl)glucoside	Flavonoids	Flavonoid	-	B	9325.2	13907	15691	254090	377010	286800	1.43805	23.5823	4.55963	up
Lnrp102163	C33H40O20	Quercetin-3-O-rutinoside-7-O-rhamnoside	Flavonoids	Flavonols	-	A	25632	11608	8902.5	42399	41044	28042	1.1754	2.4161	1.27268	up
pmp001105	C33H40O20	Kaempferol-3-O-neohesperidoside-7-O-glucoside	Flavonoids	Flavonols	-	A	53668	70319	84472	23542	13789	51384	1.13338	0.425575	-1.23251	down
Hmcp001559	C33H40O20	Isorhamnetin-3-O-rutinoside-7-O-arabinoside	Flavonoids	Flavonols	-	B	36914	31891	25585	1235.5	6478.6	2916.3	1.33587	0.112622	-3.15044	down
HJAP127	C33H40O20	Quercetin-3-O-(2''-O-Rhamnosyl)rutinoside	Flavonoids	Flavonols	55696-57-6	A	5382000	8708400	7869800	14230000	13578000	18546000	1.31282	2.11082	1.0778	up
Hmcp001329	C32H38O21	Quercetin-3-O-xylosyl(1→2)glucosyl(1→2)glucoside	Flavonoids	Flavonols	-	A	10900	20507	16947	47457	72213	51247	1.37304	3.5347	1.82159	up
Lmyp003588	C35H28O20	Quercetin-3-O-(2'',6''-digalloyl)-glucoside	Flavonoids	Flavonols	-	B	26721	28190	36707	580320	589070	518250	1.44339	18.4204	4.20323	up
HJAP128	C34H42O20	Isorhamnetin-3-O-rutinoside-7-O-rhamnoside	Flavonoids	Flavonoid	-	A	981320	1153000	1022000	925880	2773000	528480	0.111114	1.33933	0.421513	insig
HJAP023	C33H40O21	Kaempferol-6,8-di-C-glucoside-7-O-glucoside	Flavonoids	Flavonoid	-	B	20349	16252	14880	18857	3558.6	50136	0.15034	1.40929	0.494967	insig
Hmcp001589	C34H42O21	Isorhamnetin-3-O-rutinoside-4'-O-glucoside	Flavonoids	Flavonols	111393-97-6	B	137340	149950	153230	3942.4	63337	18936	1.1572	0.195713	-2.35319	down
Lmhp003162	C34H42O21	Chrysoeriol-6,8-di-C-glucoside-4'-O-glucoside	Flavonoids	Flavonoid	-	B	46111	47144	55699	6678.5	9	9	1.18562	0.0449568	-4.47532	down
pmb0676	C38H40O19	Chrysoeriol-8-C-glucoside-7-O-(6''-feruloyl)glucoside	Flavonoids	Flavonoid carbonoside	-	B	4702.7	6503.1	8269.3	45635	37014	45818	1.42247	6.59647	2.7217	up
Lmhp002374	C39H50O25	Quercetin-3-O-glucosyl(1→4)rhamnoside-7-O-rutinoside	Flavonoids	Flavonols	-	B	46702	65998	50323	101190	61971	119250	1.09235	1.73234	0.792721	insig
HJAP123	C40H52O25	Isorhamnetin-3-O-rutinoside-7-O-rutinoside	Flavonoids	Flavonoid	-	A	9083.2	20220	10548	35345	83954	38020	1.28382	3.94766	1.981	up
mws0987	C10H8O2	6-MethylCoumarin	Lignans and Coumarins	Coumarins	92-48-8	B	8647.1	11598	4720.4	6754.9	8426.4	6045.7	0.252591	0.850253	-0.234035	insig
mws1013	C9H6O4	Esculetin	Lignans and Coumarins	Coumarins	305-01-1	A	29866	72802	79531	64354	74896	50241	0.27297	1.04002	0.0566143	insig
Hmjp002337	C10H8O4	Isoscopoletin (6-Hydroxy-7-Methoxycoumarin)	Lignans and Coumarins	Coumarins	776-86-3	B	342300	303410	340680	183050	126020	192400	1.35281	0.508389	-0.975995	insig
Cmpp003619	C10H8O4	6,7-Dihydroxy-4-methylcoumarin	Lignans and Coumarins	Coumarins	529-84-0	B	385600	182510	209220	379010	182100	253060	0.108193	1.04739	0.0668029	insig
pme2993	C10H8O4	Scopoletin (7-Hydroxy-5-methoxycoumarin)	Lignans and Coumarins	Coumarins	92-61-5	B	322630	140950	186480	258370	144600	216710	0.0676508	0.953266	-0.0690495	insig
mws4173	C11H10O4	5,7-Dimethoxycoumarin (Limettin)(Citropten)	Lignans and Coumarins	Coumarins	487-06-9	B	9	9	9	336350	14184	195490	1.41084	20223.1	14.3037	up
mws1014	C10H8O5	Fraxetin (7,8-Dihydroxy-6-methoxycoumarin)	Lignans and Coumarins	Coumarins	574-84-5	B	179290	140300	134740	499770	491670	564640	1.42187	3.425	1.7761	up
Cmpp007319	C15H16O4	7-Methoxy-5-Prenyloxycoumarin	Lignans and Coumarins	Coumarins	35590-41-1	A	2241.9	3391.1	2555.5	1983	2827.9	2214.8	0.58185	0.857996	-0.220957	insig
pmb0382	C19H14O6	O-Feruloyl 4-hydroxycoumarin	Lignans and Coumarins	Coumarins	-	B	9	39462	45483	828820	1147500	1129100	1.06996	36.5541	5.19196	up
mws1015	C15H16O9	Esculin (6,7-DihydroxyCoumarin-6-glucoside)	Lignans and Coumarins	Coumarins	531-75-9	A	476010	947670	883500	1055400	537830	1333900	0.416968	1.2687	0.343356	insig
mws1077	C16H18O9	Scopoletin-7-O-glucoside (Scopolin)	Lignans and Coumarins	Coumarins	531-44-2	A	33615	33283	23474	14810	9139.3	42200	0.72136	0.731967	-0.45015	insig
Lmgp003270	C16H16O10	Scopoletin-7-O-glucuronide	Lignans and Coumarins	Coumarins	132752-65-9	B	52796	42740	44711	82367	99306	60516	1.25215	1.72687	0.788163	insig
pmn001663	C22H26O8	Syringaresinol	Lignans and Coumarins	Lignans	21453-69-0	B	1810	3003.3	2468.5	1399.3	982.26	2047.1	1.03483	0.608182	-0.717425	insig
HJN054	C25H34O10	Secoisolariciresinol-9'-O-xyloside	Lignans and Coumarins	Lignans	-	B	81818	66690	70693	143310	51277	280370	0.677588	2.16676	1.11554	insig
Lmdn001925	C26H34O12	Olivil-4'-O-glucoside	Lignans and Coumarins	Lignans	76880-93-8	B	72940	90950	62259	80883	77476	90247	0.581509	1.0993	0.136587	insig
Rfmb25702	C28H34O12	Pinoresinol-4-O-(6''-acetyl)glucoside	Lignans and Coumarins	Lignans	-	B	119570	147060	106580	12264	47544	7926	1.25375	0.18149	-2.46204	down
Rfmb26201	C30H38O14	Syringaresinol-4'-O-(6''-acetyl)glucoside	Lignans and Coumarins	Lignans	-	B	46774	84940	46635	6616.5	17996	11102	1.32306	0.200251	-2.32012	down
pmn001370	C32H42O16	Pinoresinol-4,4'-O-di-O-glucoside	Lignans and Coumarins	Lignans	63902-38-5	B	117520	120470	118920	124610	133250	170220	0.950744	1.19941	0.26232	insig
pmn001368	C32H44O17	Olivil-4,4'-Di-O-glucoside	Lignans and Coumarins	Lignans	-	B	86754	94742	69574	56744	45499	57967	1.27961	0.638109	-0.648125	insig
pma0134	C4H8O4	D-(-)-Threose	Others	Saccharides and Alcohols	95-43-2	B	65541	52116	53302	137290	153030	126410	1.41615	2.4376	1.28546	up
mws0133	C6H6N2O	Nicotinamide	Others	Vitamin	98-92-0	A	2351200	3225100	2312900	2631100	3179500	3079400	0.68199	1.12686	0.172304	insig
pme0490	C6H5NO2	Nicotinic acid (Vitamin B3)	Others	Vitamin	59-67-6	B	722890	236320	322320	284750	265870	508740	0.256968	0.826637	-0.274674	insig
pmp000509	C6H6O3	Maltol	Others	Others	118-71-8	B	804920	702230	841980	58213	67571	55135	1.44218	0.0770153	-3.69871	down
mws0889	C4H8O5	D-Threonic Acid	Others	Saccharides and Alcohols	3909-12-4	A	2146000	2287500	1865000	1246400	1635300	1250400	1.27889	0.656045	-0.608133	insig
pmb0764	C6H9NOS	4-Methyl-5-thiazoleethanol	Others	Others	137-00-8	B	1943.3	3420.2	4375.2	7887.7	11522	8794	1.31393	2.89604	1.53408	up
ML10171848	C5H8O5	D-Arabinono-1,4-lactone	Others	Saccharides and Alcohols	2782-09-4	A	122990	103500	94484	65732	85105	68175	1.24804	0.682336	-0.551447	insig
Zmgn000173	C5H10O5	D-Ribose	Others	Saccharides and Alcohols	50-69-1	B	149110	116790	151270	127260	231380	123680	0.357732	1.15617	0.209355	insig
mws1499	C5H10O5	D-Arabinose	Others	Saccharides and Alcohols	10323-20-3	B	405970	368400	316720	210680	310990	363030	0.80457	0.810841	-0.30251	insig
pme0513	C5H12O5	Xylitol	Others	Saccharides and Alcohols	87-99-0	A	9156.3	13216	17559	11706	4493.4	29442	0.156997	1.143	0.192823	insig
mws0437	C5H12O5	D-Arabitol	Others	Saccharides and Alcohols	488-82-4	A	59041	43299	55198	28741	34163	59449	0.790695	0.776657	-0.36465	insig
pme2529	C6H12O5	1,5-Anhydro-D-glucitol	Others	Saccharides and Alcohols	154-58-5	B	115810	113140	100050	85192	61597	38728	1.14117	0.563881	-0.826536	insig
Zmjp000624	C8H9NO3	Pyridoxal	Others	Vitamin	66-72-8	A	129330	113870	102140	116980	151530	79029	0.0593247	1.00637	0.00915743	insig
pme1383	C8H11NO3	Pyridoxine	Others	Vitamin	65-23-6	A	735480	897030	721430	738930	401200	780400	0.698568	0.815879	-0.293573	insig
Zmzn000078	C3H7O6P	Dihydroxyacetone phosphate	Others	Saccharides and Alcohols	57-04-5	B	184560	40135	230810	145540	100610	123160	0.00239981	0.81077	-0.302635	insig
MA10039492	C6H6O6	Dehydroascorbic acid	Others	Vitamin	490-83-5	A	1257100	922360	1451100	966370	1189100	790590	0.713134	0.811462	-0.301405	insig
mws4175	C6H8O6	D-Glucurono-6,3-lactone	Others	Saccharides and Alcohols	32449-92-6	B	2388900	2979700	2203800	1925400	2644200	2078100	0.625056	0.877885	-0.187895	insig
Hmfn000531	C6H8O6	L-Ascorbic acid (Vitamin C)	Others	Vitamin	50-81-7	A	4542400	5639900	5134400	3706000	5240000	4007600	0.81845	0.845717	-0.241752	insig
pme1021	C6H10O6	D-Glucono-1,5-lactone	Others	Saccharides and Alcohols	90-80-2	B	14148	13229	18353	8423.4	7815.6	11524	1.24477	0.607107	-0.719977	insig
pmb0786	C6H13NO5	D-Glucosamine	Others	Saccharides and Alcohols	3416-24-8	B	96090	87465	92817	104880	83641	78113	0.318305	0.964765	-0.0517507	insig
pme0516	C6H12O6	Inositol	Others	Saccharides and Alcohols	87-89-8	B	129500	94197	92131	64385	111060	83292	0.70321	0.819234	-0.287653	insig
mws1164	C6H12O6	D-Fructose*	Others	Saccharides and Alcohols	7660-25-5	A	1412400	1112800	1065500	734900	1069500	1273200	0.635543	0.857103	-0.222459	insig
mws4170	C6H12O6	D-Glucose*	Others	Saccharides and Alcohols	14431-43-7	A	1360400	933340	857770	563410	1202300	1449800	0.101189	1.02031	0.0290043	insig
mws0214	C6H14O6	D-Sorbitol	Others	Saccharides and Alcohols	50-70-4	B	17424	8255.8	10963	8671.1	12589	15638	0.0350083	1.00697	0.0100168	insig
pme2237	C6H14O6	Dulcitol	Others	Saccharides and Alcohols	608-66-2	B	16927	7244.7	6912.1	12436	10844	12953	0.5188	1.16566	0.221141	insig
pme2596	C8H9NO4	4-Pyridoxic acid	Others	Vitamin	82-82-6	A	289040	337120	335980	224750	184000	312310	1.01598	0.749434	-0.416128	insig
Zmgn000447	C3H7O7P	3-Phospho-D-glyceric acid	Others	Saccharides and Alcohols	820-11-1	B	1097100	881400	1041000	1096500	460190	2081600	0.0117208	1.20493	0.268951	insig
pme3705	C6H10O7	D-Glucoronic acid*	Others	Saccharides and Alcohols	6556-12-3	B	88928	97944	65759	42061	63342	59161	1.12359	0.651401	-0.618383	insig
pme0534	C6H12O7	Gluconic acid	Others	Saccharides and Alcohols	526-95-4	A	264040	167160	203170	64319	157470	45775	1.1213	0.421779	-1.24544	down
Zmzn000079	C4H9O7P	D-Erythrose-4-phosphate	Others	Saccharides and Alcohols	585-18-2	B	154200	101910	149610	91017	91976	122780	0.954134	0.753655	-0.408023	insig
pme1261	C9H19NO4	D-Panthenol	Others	Saccharides and Alcohols	81-13-0	B	17971	6989.4	10753	117220	69573	5385.5	0.750836	5.38113	2.42791	insig
Zmyn000108	C6H10O8	D-Saccharic acid*	Others	Saccharides and Alcohols	87-73-0	A	567510	426600	568090	665090	776820	620420	1.11567	1.32014	0.400696	insig
Zmpn000199	C6H10O8	D-Galactaric acid*	Others	Saccharides and Alcohols	526-99-8	A	1178600	987840	905000	600090	756270	671780	1.2996	0.660322	-0.598758	insig
Hmcn000192	C7H14O7	Sedoheptulose	Others	Saccharides and Alcohols	3019-74-7	A	547990	380970	390060	374780	374840	479840	0.348578	0.932101	-0.101442	insig
mws1337	C9H17NO5	D-Pantothenic Acid	Others	Vitamin	79-83-4	A	802380	697010	747140	1305100	886750	1971400	1.09013	1.85319	0.890012	insig
Hmyp002656	C11H11NO4	Methyl dioxindole-3-acetate	Others	Others	57061-18-4	A	9228.2	5297.1	4618.2	14157	9056.4	7915.1	0.968865	1.62606	0.701381	insig
mws4174	C8H15NO6	N-Acetyl-D-mannosamine	Others	Saccharides and Alcohols	7772-94-3	B	34373	19672	36585	16316	16840	26875	0.924826	0.662374	-0.594281	insig
mws2608	C8H15NO6	N-Acetyl-D-galactosamine	Others	Saccharides and Alcohols	1811-31-0	B	27786	18511	16338	11162	7546.2	16073	1.1057	0.5553	-0.848661	insig
pme2755	C8H15NO6	N-Acetyl-D-glucosamine	Others	Saccharides and Alcohols	7512-17-6	B	147470	157870	136850	129870	149690	131690	0.720892	0.93003	-0.104651	insig
pme2266	C10H16N2O3S	Biotin	Others	Vitamin	58-85-5	B	200540	155850	204770	157130	201120	233730	0.206034	1.05492	0.0771363	insig
pma3101	C11H14NO6+	Nicotinate D-ribonucleoside	Others	Vitamin	17720-18-2	B	3042100	742170	1367700	415140	429740	432410	1.21898	0.247923	-2.01204	down
Zmyn000110	C6H14NO8P	D-Glucosamine 1-phosphate	Others	Saccharides and Alcohols	2152-75-2	B	56314	53433	80795	49390	59815	37133	0.807601	0.768009	-0.380805	insig
mws1090	C6H13O9P	Glucose-1-phosphate*	Others	Saccharides and Alcohols	59-56-3	A	4720800	4312000	4730800	2955400	2474700	3068600	1.39406	0.617477	-0.695544	insig
mws0866	C6H13O9P	D-Glucose 6-phosphate*	Others	Saccharides and Alcohols	56-73-5	A	5852800	5965100	6183900	3678500	2685400	3851900	1.35321	0.567488	-0.817339	insig
pme3313	C6H13O9P	D-Fructose 6-phosphate*	Others	Saccharides and Alcohols	643-13-0	A	904560	620130	962210	599510	349430	863050	0.78852	0.728614	-0.456774	insig
Zmpn000095	C6H15O9P	Sorbitol-6-phosphate	Others	Saccharides and Alcohols	20479-58-7	B	30846	34399	56559	31862	59575	29370	0.0362572	0.991815	-0.0118575	insig
mws1038	C11H22N2O4S	Pantetheine	Others	Others	496-65-1	B	2397.5	7408.3	3682.9	5072.3	11628	4125.6	0.65914	1.54395	0.626628	insig
pme3163	C7H15O10P	D-Sedoheptuiose 7-phosphate	Others	Saccharides and Alcohols	2646-35-7	B	770540	1335600	778090	594410	671060	512010	1.06988	0.616275	-0.698353	insig
pme2816	C20H28O2	4-Oxoretinol	Others	Vitamin	62702-55-0	B	3280.9	2504.8	2635.1	4484.9	3761.1	6391.2	1.18354	1.73822	0.79761	insig
pmb0789	C14H21NO8	Pyridoxine-5'-O-glucoside	Others	Vitamin	-	B	382650	313400	423620	192060	250120	229680	1.31623	0.600052	-0.736841	insig
pme3311	C6H14O12P2	D-Fructose-1,6-biphosphate	Others	Saccharides and Alcohols	488-69-7	B	29127	15740	41332	32944	32349	36061	0.537285	1.17581	0.23366	insig
Zmyn000083	C6H14O12P2	D-Glucose 1,6-bisphosphate	Others	Saccharides and Alcohols	10139-18-1	B	31224	6900.6	41407	27691	24768	27183	0.29196	1.00139	0.00200126	insig
mws1080	C12H22O11	Galactinol	Others	Saccharides and Alcohols	3687-64-7	A	406000	548720	653240	1047800	1290400	2055200	1.29045	2.73228	1.45011	up
Lmsn000381	C12H22O11	D-Maltose*	Others	Saccharides and Alcohols	133-99-3	A	223400	507550	244020	815030	768470	1427200	1.25833	3.08799	1.62667	up
mws5038	C12H22O11	Isomaltulose*	Others	Saccharides and Alcohols	13718-94-0	A	255490	743660	425080	910580	758570	1447600	1.09512	2.18838	1.12986	up
mws0264	C12H22O11	D-Trehalose*	Others	Saccharides and Alcohols	99-20-7	A	165000	279740	305270	324420	426390	700200	1.05869	1.93465	0.952076	insig
pme0519	C12H22O11	D-Sucrose*	Others	Saccharides and Alcohols	57-50-1	A	182650	244490	262910	556120	606250	1065200	1.33237	3.22813	1.6907	up
pmb0801	C14H19NO9	4-Pyridoxic acid-O-glucoside	Others	Vitamin	-	A	26244	25465	39220	56537	51851	103740	1.20652	2.3329	1.22212	up
mws5040	C12H21O11Na	Turanose	Others	Saccharides and Alcohols	547-25-1	B	131310	330720	195980	327580	259620	985720	0.875622	2.39042	1.25726	insig
mws0232	C17H20N4O6	Riboflavin (Vitamin B2)	Others	Vitamin	83-88-5	A	913400	1189800	757010	862280	1667300	787450	0.30749	1.15972	0.213771	insig
mws2523	C12H23O14P	Trehalose 6-phosphate	Others	Saccharides and Alcohols	4484-88-2	B	5412.2	4685.9	12963	6087.5	7927.5	6000.7	0.0858119	0.867942	-0.204329	insig
pme1014	C31H40O2	Menatetrenone (Vitamin K2)	Others	Vitamin	11032-49-8	B	55962	55724	47735	49916	70458	53101	0.454566	1.08816	0.121886	insig
pmp001282	C28H50NO7P	Propyl 2-(trimethylammonio)ethyl phosphate	Others	Others	-	A	1607300	713450	1587900	998790	584130	485590	0.970707	0.529213	-0.918078	insig
mws0024	C7H6O5	Gallic acid	Tannins	Tannin	149-91-7	B	127820	59149	82327	52532	42459	55358	1.10754	0.558304	-0.840878	insig
Lmfp001509	C13H16O9	1-O-Galloyl-rhamnose	Tannins	Tannin	-	B	165560	122370	150970	30082	20031	37213	1.41269	0.198966	-2.32941	down
pmn001513	C14H10O9	Digallic Acid	Tannins	Tannin	536-08-3	B	8876.1	8355.8	6845	13681	8845.1	8127.7	0.764575	1.27316	0.348416	insig
Lmfn000604	C13H16O10	6-O-Galloyl-D-glucose	Tannins	Tannin	13186-19-1	A	151710	141230	127260	176610	164410	218710	1.15906	1.33206	0.413655	insig
pmn001518	C13H16O10	1-O-Galloyl-D-glucose	Tannins	Tannin	58511-73-2	A	406800	440180	507510	424250	593630	361090	0.0334426	1.01807	0.0258413	insig
Hmln000873	C13H16O10	2-O-Galloyl-D-glucose	Tannins	Tannin	-	B	527210	729670	675320	532750	731440	569280	0.241113	0.948903	-0.0756678	insig
Lmsp005625	C22H18O13	3-O-Methylellagic acid-4'-O-(5''-O-acetyl)arabinoside	Tannins	Tannin	-	B	9421.3	4583.1	7060.4	9	9	9	1.4445	0.00128176	-9.60766	down
pmb0782	C5H11N	Piperidine	Alkaloids	Alkaloids	110-89-4	B	4880600	4785100	4760100	6276500	5844700	4164800	0.585431	1.12895	0.174981	insig
pme2292	C4H12N2	Putrescine	Alkaloids	Phenolamine	110-60-1	B	103760	37011	52903	56923	83770	15628	0.378424	0.807135	-0.309119	insig
pme1841	C5H14N2	Cadaverine	Alkaloids	Phenolamine	462-94-2	B	7716.9	4021.6	4593.8	14433	17881	14749	1.34339	2.88159	1.52687	up
pmb0484	C5H13NO	Choline	Alkaloids	Alkaloids	62-49-7	B	26383000	16152000	25387000	16618000	7203200	5506500	1.13124	0.431785	-1.21162	down
pmb1096	C8H7N	Indole	Alkaloids	Plumerane	120-72-9	A	7842.8	6569.1	8157.9	10583	7906.4	11409	1.02429	1.32471	0.405675	insig
mws0191	C5H11NO2	Betaine	Alkaloids	Alkaloids	107-43-7	A	639970	599310	492180	593450	694630	554420	0.437376	1.06413	0.0896756	insig
pmp001287	C8H9N	N-Benzylmethylene isomethylamine	Alkaloids	Alkaloids	-	A	5425000	5407500	6056600	15466000	9063900	6695400	1.09261	1.84884	0.886623	insig
mws0491	C8H11N	Phenethylamine	Alkaloids	Alkaloids	64-04-0	A	10039000	9352500	10438000	12793000	37451000	9893000	0.803473	2.01602	1.01151	insig
pmp001198	C6H13NO2	6-Deoxyfagomine	Alkaloids	Alkaloids	197449-09-5	A	6301900	5795300	5898700	7977700	7458800	5366000	0.693666	1.15596	0.209089	insig
HJKP000649	C8H9NO	N-benzylformamide	Alkaloids	Alkaloids	6343-54-0	B	1944100	1627700	1652400	1931300	1545400	1137600	0.567067	0.883255	-0.179098	insig
pme2268	C7H7NO2	Trigonelline	Alkaloids	Alkaloids	535-83-1	A	16948000	21962000	22828000	28469000	19989000	31950000	0.857863	1.30241	0.38118	insig
mws0146	C7H7NO2	Nicotinic Acid Methyl Ester(Methyl Nicotinate)	Alkaloids	Alkaloids	93-60-7	B	28030	50608	30533	158260	64699	126960	1.25275	3.20524	1.68043	up
pma0948	C8H11NO	Phenylethanolamine	Alkaloids	Alkaloids	7568-93-6	B	1084500	787450	800560	1808300	2094400	1612600	1.36309	2.06372	1.04524	up
pme1137	C6H5NO3	6-Hydroxynicotinic acid	Alkaloids	Alkaloids	5006-66-6	B	20753	25761	38807	17810	33155	25654	0.277172	0.898009	-0.155199	insig
mws0704	C2H8NO4P	O-Phosphorylethanolamine	Alkaloids	Alkaloids	1071-23-4	B	73279	75569	81379	39262	27512	64017	1.1542	0.568096	-0.815794	insig
pma2987	C6H11N3O	Histidinol	Alkaloids	Alkaloids	501-28-0	B	7085800	6604000	5758400	6040400	5627000	5959100	0.870809	0.906331	-0.141891	insig
mws0103	C9H7NO	Indole-3-carboxaldehyde	Alkaloids	Plumerane	487-89-8	B	69403	65426	72066	70120	61536	90863	0.322887	1.07552	0.10503	insig
pme1691	C7H16NO2	Acetylcholine	Alkaloids	Alkaloids	60-31-1	B	101400	79401	82150	45628	50168	79075	1.12067	0.665033	-0.588503	insig
Lmgp000796	C8H7NO2	4-Hydroxymandelonitrile	Alkaloids	Alkaloids	13093-65-7	A	5338600	6206800	7339700	6722300	5312700	5762600	0.329432	0.942415	-0.0855657	insig
pmb0819	C10H8N2	3-Indoleacetonitrile	Alkaloids	Plumerane	771-51-7	B	13054	13461	18425	31073	26455	21278	1.2762	1.75358	0.810305	insig
mws0005	C10H12N2	Tryptamine	Alkaloids	Plumerane	61-54-1	A	25655000	12550000	14506000	622890	1305300	769120	1.41678	0.0511717	-4.28851	down
mws1417	C9H7NO2	Indole-3-carboxylic acid	Alkaloids	Plumerane	771-50-6	B	37346	28079	29810	27348	20283	30412	0.852262	0.819478	-0.287223	insig
mws1346	C6H11NO4	DL-2-Aminoadipic acid	Alkaloids	Alkaloids	542-32-5	B	156820	129590	188810	160930	160280	126610	0.272441	0.942342	-0.0856766	insig
pmb0037	C10H15NO	Hordenine	Alkaloids	Alkaloids	539-15-1	B	486980	596890	554790	1304600	887330	1576100	1.3138	2.29946	1.20129	up
Hmtp000776	C8H9NO3	4,5,6-Trihydroxy-2-cyclohexen-1-ylideneacetonitrile	Alkaloids	Alkaloids	-	B	195140	196600	239480	624710	352630	247380	1.06981	1.94024	0.956237	insig
pme1651	C10H9NO2	Indole 3-acetic acid (IAA)	Alkaloids	Plumerane	87-51-4	B	33930	35386	33848	18744	15868	8937	1.28176	0.422134	-1.24423	down
pmb0774	C10H12N2O	N-Hydroxytryptamine*	Alkaloids	Phenolamine	-	A	6059900	5106600	3820900	237660	463180	400580	1.42337	0.0734897	-3.76631	down
pme2024	C10H12N2O	Serotonin*	Alkaloids	Plumerane	50-67-9	A	7601800	6772800	5234000	255240	561950	490510	1.42081	0.0666901	-3.90638	down
Zmtn001624	C10H7NO3	N-Acetylisatin	Alkaloids	Plumerane	574-17-4	A	715670	577770	586490	744650	770610	735130	1.13805	1.19706	0.259496	insig
mws0018	C10H26N4	Spermine	Alkaloids	Phenolamine	71-44-3	B	6677600	6965500	5378200	5242800	5429900	5871700	0.893219	0.869783	-0.201273	insig
pmb0818	C11H11NO3	Methoxyindoleacetic acid	Alkaloids	Plumerane	3471-31-6	B	373790	316200	331330	604010	518480	445330	1.30828	1.53509	0.618325	insig
mws0677	C12H14N2O2	N-Acetyl-5-hydroxytryptamine	Alkaloids	Alkaloids	1210-83-9	B	242220	254670	237100	172440	117360	118860	1.32599	0.556765	-0.844859	insig
Lmlp003161	C14H20N2O3	N-Feruloylputrescine	Alkaloids	Phenolamine	501-13-3	B	22723	25301	11388	11851	4400.5	7948.2	1.11858	0.40732	-1.29577	down
pmp001252	C17H17NO3	p-Coumaroyltyramine	Alkaloids	Phenolamine	36417-86-4	B	3193.3	18476	8119.4	9	9	8859.8	1.01514	0.298026	-1.74649	down
Lmtp001399	C14H17NO7	5,6-Dihydroxyindole-5-O-β-glucoside	Alkaloids	Alkaloids	-	B	143630	168730	125150	187710	253940	178680	1.13985	1.41786	0.50372	insig
mws1433	C18H19NO4	N-Feruloyltyramine	Alkaloids	Phenolamine	66648-43-9	A	298590	421480	294440	471230	386380	144850	0.175731	0.988122	-0.0172384	insig
mws0983	C20H39NO2	N-Oleoylethanolamine	Alkaloids	Alkaloids	111-58-0	B	273900	67372	97473	28481	33859	26513	1.24996	0.202516	-2.30389	down
pmb0776	C20H20N2O3	N-Feruloyltryptamine	Alkaloids	Phenolamine	53905-13-8	A	56322	47291	47998	1379.6	2200.3	1038.1	1.43109	0.0304595	-5.03696	down
pmb2211	C19H38N2O3	Cocamidopropyl betaine	Alkaloids	Alkaloids	4292-10-8	A	21381	36508	17619	36981	37110	58968	1.06793	1.76218	0.817365	insig
HJAP050	C19H21NO5	N-Feruloyl-3-methoxytyramine	Alkaloids	Phenolamine	78510-19-7	A	97658	263840	142890	9	129070	9	1.01644	0.25593	-1.96618	down
Lmlp003024	C20H30O7N4	N'-p-Coumaroylagmatine-glucoside	Alkaloids	Phenolamine	-	B	45240	53168	55959	10420	9	9	1.15197	0.0676181	-3.88645	down
Lmhp005872	C25H30N2O6	Diferuloylcadaverine	Alkaloids	Phenolamine	-	B	42576	46026	34806	2599.3	20350	5720.5	1.19397	0.232317	-2.10583	down
pmb1912	C20H23N7O7	10-Formyltetrahydrofuran	Alkaloids	Alkaloids	2800-34-2	B	78765	54719	61637	110790	110060	94447	1.29533	1.61591	0.692342	insig
mws1138	C24H26N2O13	Betanin (Betanidin-5-O-glucoside)	Alkaloids	Alkaloids	7659-95-2	B	61594	57765	66809	14514	131880	22748	0.542871	0.908545	-0.13837	insig
pmb0492	C34H37N3O6	N',N'',N'''-p-Coumaroyl-cinnamoyl-caffeoyl spermidine	Alkaloids	Phenolamine	-	B	364580	102530	178570	79690	98413	52834	1.08821	0.357665	-1.48332	down
Lmqn000780	C17H27N3O17P2	Uridine 5'-diphospho-N-acetylglucosamine	Alkaloids	Alkaloids	528-04-1	B	21566	21320	27935	30590	32579	24119	0.937884	1.23252	0.301606	insig
Lmlp002205	C11H16O3	Isololiolide	Terpenoids	Terpene	38274-00-9	B	19756	44168	24071	28981	14605	20800	0.595824	0.731701	-0.450675	insig
Hmgp005956	C13H18O3	Dehydrovomifoliol	Terpenoids	Monoterpenoids	15764-81-5	B	92750	103130	79602	50655	81854	82960	0.865564	0.782153	-0.354478	insig
pmp000436	C30H50O	Taraxerol	Terpenoids	Triterpene	127-22-0	B	800.2	9	9	9	9	9	0.668337	0.0329993	-4.92142	insig
mws4053	C30H48O3	Ursolic acid	Terpenoids	Triterpene	77-52-1	B	5801.8	7652	9357.8	8939	8101	9370	0.717001	1.15774	0.211317	insig
Lmsn012425	C30H48O4	Rubusic acid (3β,7α-Dihydroxyolean-12-en-28-oic acid)	Terpenoids	Triterpene	23984-26-1	A	37399	7100.7	15334	1991.1	679.05	1190.7	1.33515	0.0645263	-3.95397	down
Lmsn009589	C30H48O6	2α,3β,19α,23-Tetrahydroxyurs-12-en-28-oic acid	Terpenoids	Triterpene	-	B	9	9	9	1659	3013.1	662.43	1.43042	197.575	7.62626	up
Lmmn004145	C38H60O10	3-O-(2-O-Acetyl-glucosyl)oleanolic acid	Terpenoids	Triterpene	-	A	9064000	4368700	10024000	4118700	3912000	1448400	1.06045	0.404111	-1.30718	down
Lmsn006130	C36H56O12	2α,3β,19α-Trihydroxyurs-12-en-23,28-dioic acid-28-O-glucoside	Terpenoids	Triterpene	-	A	10729	8946.6	14029	22125	18484	19592	1.30309	1.78614	0.836842	insig
pmn001505	C41H64O13	Oleanolic acid-3-O-xylosyl(1→3)glucuronide	Terpenoids	Triterpene	-	A	137030	34713	97060	35077	24608	8953.1	1.09784	0.255347	-1.96947	down
pme2601	C3H6O3	3-Hydroxypropanoic acid	Organic acids	Organic acids	503-66-2	B	36558	45190	35952	25612	36795	19705	0.991829	0.697638	-0.519449	insig
Lmqp000873	C4H4O3	Succinic anhydride	Organic acids	Organic acids	108-30-5	B	1886700	2048100	1465100	1797700	2679000	1261200	0.101098	1.06259	0.0875901	insig
mws4052	C4H7NO2	1-Aminocyclopropane-1-carboxylic acid	Organic acids	Organic acids	22059-21-8	B	504300	559760	531010	458700	523750	583390	0.222244	0.981675	-0.0266829	insig
pme3011	C4H9NO2	γ-Aminobutyric acid	Organic acids	Organic acids	56-12-2	B	405570	412670	524620	788930	366900	522220	0.513311	1.24961	0.321477	insig
ML10172161	C3H4O4	Hydroxypyruvic acid	Organic acids	Organic acids	1113-60-6	B	238970	294320	325860	452180	565910	453150	1.3373	1.71244	0.776051	insig
mws0576	C4H8O3	3-Hydroxybutyric acid	Organic acids	Organic acids	300-85-6	B	271270	255410	291200	389400	417870	169680	0.286566	1.19449	0.256396	insig
mws0574	C4H8O3	2-Hydroxyisobutyric acid	Organic acids	Organic acids	594-61-6	A	2085100	1972300	2426200	1916000	1566700	1494400	1.15821	0.767645	-0.38149	insig
pme1975	C3H4O4	Malonic acid	Organic acids	Organic acids	141-82-2	B	980330	1058500	866560	1199300	1828500	1512200	1.23239	1.56261	0.64396	insig
pme0048	C2H7NO2S	2-Aminoethanesulfinic acid	Organic acids	Organic acids	300-84-5	B	4818.7	4770.9	2181.3	639.91	2847.6	2532.5	0.857255	0.511432	-0.967387	insig
mws0376	C4H4O4	Fumaric acid	Organic acids	Organic acids	110-17-8	B	76850	54933	48050	57699	54767	20551	0.649225	0.73967	-0.435047	insig
pme0275	C5H8O3	4-Oxopentanoic Acid	Organic acids	Organic acids	123-76-2	B	15288	11050	11861	10206	10116	5680.1	0.97823	0.680701	-0.554907	insig
mws0823	C5H8O3	3-Methyl-2-Oxobutanoic acid	Organic acids	Organic acids	759-05-7	B	81993	69378	71250	40952	52940	28349	1.22702	0.549099	-0.864861	insig
pme1730	C4H6O4	D-Erythronolactone	Organic acids	Organic acids	15667-21-7	B	491170	710690	592100	511290	828240	562560	0.216455	1.06027	0.0844378	insig
mws0470	C4H6O4	Methylmalonic acid*	Organic acids	Organic acids	516-05-2	A	6884400	6470900	4624700	5381600	8348400	3406800	0.219935	0.953103	-0.0692953	insig
mws0192	C4H6O4	Succinic acid*	Organic acids	Organic acids	110-15-6	A	7066100	6749400	4639800	5487400	8338500	3443700	0.252723	0.935753	-0.0958005	insig
mws0147	C5H10O3	β-Hydroxyisovaleric acid	Organic acids	Organic acids	625-08-1	B	810820	522520	694190	463520	508910	224180	1.00292	0.590181	-0.76077	insig
pme3096	C3H5NO4	Aminomalonic acid	Organic acids	Organic acids	1068-84-4	B	5923700	5677100	3978800	4978400	7564400	3194900	0.0650312	1.01015	0.0145665	insig
pme1216	C6H5NO2	2-Picolinic acid	Organic acids	Organic acids	98-98-6	B	429770	120240	163300	169110	154960	260340	0.159704	0.819293	-0.287548	insig
Lmbp000668	C6H5NO2	Isonicotinic acid	Organic acids	Organic acids	55-22-1	B	722860	262460	320070	293000	266880	550830	0.253259	0.850864	-0.232999	insig
Lmbn000612	C5H7NO3	1-Pyrroline-4-hydroxy-2-carboxylic acid	Organic acids	Organic acids	9054-77-7	B	1625.7	3841.2	886.43	6615.4	4188.7	1366.8	0.680428	1.91567	0.937851	insig
mws0425	C5H6O4	Citraconic acid	Organic acids	Organic acids	498-23-7	B	26445	40159	35383	34833	35013	40879	0.489201	1.08568	0.118596	insig
Zmpn000638	C4H9N3O2	3-Guanidinopropionic acid	Organic acids	Organic acids	353-09-3	B	41840	35150	29790	25258	29530	28043	1.09528	0.775716	-0.366399	insig
pme0274	C6H13NO2	6-Aminocaproic acid	Organic acids	Organic acids	60-32-2	B	680360	535340	514030	796780	687860	456410	0.374748	1.12217	0.16629	insig
pme3034	C5H8O4	Ethylmalonic acid	Organic acids	Organic acids	601-75-2	B	32451	22933	30183	9496	13787	12086	1.37213	0.413349	-1.27457	down
pme0243	C5H8O4	Glutaric acid	Organic acids	Organic acids	110-94-1	B	788680	520480	657540	298340	374230	246360	1.31762	0.467245	-1.09775	down
Lmmn000806	C5H8O4	Dimethylmalonic acid*	Organic acids	Organic acids	595-46-0	A	247070	153190	303940	69350	110410	16411	1.10734	0.278573	-1.84387	down
Lmbn001364	C5H8O4	4-Hydroxy-2-Oxopentanoic Acid*	Organic acids	Organic acids	3318-73-8	B	235720	162150	296620	62776	102740	18490	1.16254	0.264951	-1.9162	down
Lmbn001288	C5H8O4	2-Hydroxy-2-methyl-3-oxobutanoic acid*	Organic acids	Organic acids	71698-08-3	B	245470	164060	290430	69738	97812	18544	1.16359	0.265864	-1.91124	down
mws0473	C5H8O4	2-Methylsuccinic acid*	Organic acids	Organic acids	498-21-5	A	2716800	1822800	3148700	806890	1251000	225130	1.13111	0.296947	-1.75172	down
Lmgn000160	C4H8N2O3	3-Ureidopropionic Acid	Organic acids	Organic acids	462-88-4	B	21380	16510	13039	19577	24965	13674	0.398766	1.14308	0.192928	insig
Lmrn002746	C6H12O3	2-Hydroxy-4-methylpentanoic acid	Organic acids	Organic acids	498-36-2	A	89688	117230	135640	46798	28340	47394	1.34535	0.357697	-1.48319	down
mws0341	C6H12O3	2-Hydroxyisocaproic acid	Organic acids	Organic acids	20312-37-2	A	90397	29337	55432	16932	62307	12784	0.805045	0.525347	-0.928656	insig
mws0972	C6H12O3	6-Hydroxyhexanoic acid	Organic acids	Organic acids	1191-25-9	A	258380	258080	309670	439130	602040	297130	1.0673	1.61996	0.695961	insig
mws0275	C4H6O5	L-Malic acid*	Organic acids	Organic acids	97-67-6	A	42176000	41204000	23845000	32267000	35125000	46574000	0.245495	1.06287	0.0879622	insig
Lmbn000198	C4H6O5	3-Dehydro-L-Threonic Acid*	Organic acids	Organic acids	-	A	15805000	12218000	9319800	10249000	10635000	14034000	0.243247	0.935066	-0.0968592	insig
Lmbn002862	C7H6O3	3-Hydroxybenzoic Acid	Organic acids	Organic acids	99-06-9	B	6497700	1475700	2972100	1657000	2241800	1761400	0.725482	0.517126	-0.951413	insig
pme3207	C6H6O4	Muconic acid	Organic acids	Organic acids	1119-72-8	A	2046000	2087700	1930400	2117200	2168200	3469500	0.782484	1.27882	0.354815	insig
pme0295	C6H11NO3	4-Acetamidobutyric acid	Organic acids	Organic acids	3025-96-5	B	41955	39173	48820	26552	12188	32969	1.08363	0.551828	-0.857708	insig
mws0567	C5H11N3O2	4-Guanidinobutyric acid	Organic acids	Organic acids	463-00-3	B	233210	174560	281220	148000	114680	102260	1.25984	0.529674	-0.916824	insig
pme2380	C5H6O5	α-Ketoglutaric acid	Organic acids	Organic acids	328-50-7	B	217060	148870	224160	171420	167530	174780	0.628417	0.870596	-0.199925	insig
mws0208	C6H10O4	Adipic Acid*	Organic acids	Organic acids	124-04-9	B	992240	664080	647270	370050	437150	225650	1.23752	0.448365	-1.15725	down
Wmzn000227	C6H10O4	2,2-Dimethylsuccinic acid	Organic acids	Organic acids	597-43-3	A	30069	17149	22461	110380	124800	35099	1.1968	3.87892	1.95565	up
Lmbn001609	C6H10O4	2-Acetyl-2-Hydroxybutanoic Acid	Organic acids	Organic acids	-	B	135990	95359	85646	59371	61833	33491	1.19807	0.488005	-1.03503	down
mws0924	C6H10O4	2-Methylglutaric acid*	Organic acids	Organic acids	617-62-9	B	875860	589220	502670	353640	444390	220110	1.12693	0.517413	-0.950611	insig
Lmbn001676	C6H10O4	3-Hydroxy-3-Methyl-2-Oxopentanoic Acid	Organic acids	Organic acids	-	B	18676	14618	26550	5296.5	12467	2836.7	1.13539	0.344232	-1.53855	down
pmb2826	C5H8O5	L-Citramalic acid	Organic acids	Organic acids	6236-09-5	A	649790	521670	407060	352060	499920	457670	0.682248	0.82967	-0.269391	insig
Lmbn000216	C5H8O5	3-Methylmalic acid	Organic acids	Organic acids	152204-30-3	A	42849	23045	31280	10830	12140	20720	1.22745	0.449606	-1.15327	down
pme3154	C6H12O4	Mevalonic acid	Organic acids	Organic acids	150-97-0	B	163780	144700	306880	410840	528230	375880	1.22871	2.13688	1.09551	up
mws0262	C4H6O6	L-Tartaric acid	Organic acids	Organic acids	87-69-4	B	1172600	1101400	1068900	591850	615530	830700	1.3393	0.609674	-0.71389	insig
mws0596	C7H7NO3	3-Hydroxyanthranilic acid	Organic acids	Organic acids	548-93-6	B	9	23579	11675	39607	24672	54170	0.813294	3.35902	1.74804	insig
mws0639	C7H6O4	2,3-Dihydroxybenzoic Acid*	Organic acids	Organic acids	303-38-8	A	1696000	474680	804030	597970	530120	328990	0.866893	0.489823	-1.02967	insig
Lmbn001467	C7H13NO3	5-Acetamidopentanoic Acid	Organic acids	Organic acids	1072-10-2	B	72375	51586	57751	64434	68244	46779	0.064778	0.98759	-0.0180155	insig
Zmjn001813	C7H12O4	Pimelic acid*	Organic acids	Organic acids	111-16-0	B	17555	17102	13911	74203	52969	146100	1.34193	5.62659	2.49226	up
Lmbn002072	C7H12O4	2-Propylsuccinic acid*	Organic acids	Organic acids	618-57-5	B	27505	22734	22386	65073	32484	106470	1.13108	2.80932	1.49022	up
pme2761	C5H6O6	4-Hydroxy-2-oxoglutaric acid	Organic acids	Organic acids	1187-99-1	B	41415	65400	58071	32204	53491	39948	0.796631	0.761999	-0.392139	insig
mws0159	C9H8O3	Phenylpyruvic acid	Organic acids	Organic acids	156-06-9	B	105810	219220	139610	118230	160700	136140	0.205484	0.893315	-0.162759	insig
pme0282	C8H6O4	Phthalic acid	Organic acids	Organic acids	88-99-3	A	157080	100670	171540	69464	80714	49210	1.24671	0.46446	-1.10637	down
mws0344	C5H10O6	D-Xylonic acid	Organic acids	Organic acids	526-91-0	A	2775500	2214100	2427100	1212000	2501800	944840	0.961664	0.628128	-0.670869	insig
mws2125	C3H5O6P	Phosphoenolpyruvate	Organic acids	Organic acids	138-08-9	B	290480	296020	424140	396070	129600	835570	0.0407718	1.34691	0.429652	insig
pme3186	C3H7O6P	DL-Glyceraldehyde-3-phosphate	Organic acids	Organic acids	591-59-3	B	77040	18597	65895	49927	37988	80904	0.195763	1.04511	0.0636573	insig
Lmbn003524	C9H16O3	9-Oxononanoic acid	Organic acids	Organic acids	2553-17-5	B	9359.9	10006	11415	9501.6	14774	9500.5	0.353208	1.09731	0.133967	insig
pme3009	C6H6O6	Trans-Citridic acid	Organic acids	Organic acids	4023-65-8	B	348740	649620	525370	427390	495070	509500	0.103713	0.939773	-0.0896161	insig
Lmgn002555	C8H14O4	2-Propylglutaric acid	Organic acids	Organic acids	32806-62-5	A	374690	368580	487050	199800	51609	150540	1.20968	0.326703	-1.61395	down
mws0242	C8H14O4	Suberic Acid	Organic acids	Organic acids	505-48-6	B	157060	89181	84685	44867	34302	31638	1.33729	0.334839	-1.57846	down
pmb3101	C7H12O5	2-Isopropylmalic Acid	Organic acids	Organic acids	49601-06-1	A	880870	933820	945660	985960	1529900	551220	0.0889402	1.11112	0.152015	insig
Zmgn001448	C7H12O5	2-Propylmalic Acid*	Organic acids	Organic acids	-	A	942500	1280300	1056700	1116300	1757400	662030	0.0541079	1.07813	0.108532	insig
Lmbn001754	C7H12O5	3-Isopropylmalic Acid*	Organic acids	Organic acids	921-28-8	A	990400	1044600	960290	1117500	1633100	659820	0.208588	1.13859	0.187254	insig
mws0237	C9H16O4	Azelaic acid	Organic acids	Organic acids	123-99-9	A	1112300	940290	894530	986090	993570	862200	0.297909	0.964284	-0.0524703	insig
Zmyn000453	C6H8O7	Isocitric Acid	Organic acids	Organic acids	320-77-4	A	7954700	6292000	6657500	6209700	6929400	8144900	0.0770774	1.01817	0.0259765	insig
mws0281	C6H8O7	Citric Acid	Organic acids	Organic acids	77-92-9	A	6547900	4511600	4662000	3658900	4324600	5397800	0.664626	0.851147	-0.232521	insig
mws0277	C7H12O6	Quinic Acid	Organic acids	Organic acids	77-95-2	A	2198300	2171500	2310700	1846600	1920700	2384200	0.716656	0.920814	-0.119018	insig
mws1189	C6H10O7	D-Galacturonic acid*	Organic acids	Organic acids	685-73-4	B	94319	83303	35350	26641	66548	44770	0.661338	0.64778	-0.626424	insig
Zmtn001464	C10H7NO4	4,8-Dihydroxyquinoline-2-carboxylic acid	Organic acids	Organic acids	59-00-7	B	9	3539.9	1797.9	26573	16347	9467.9	1.02992	9.79799	3.29249	up
mws0474	C12H22O4	Dodecanedioic aicd	Organic acids	Organic acids	693-23-2	A	1145.7	452.09	1548.2	724.38	969.09	990.86	0.108351	0.853254	-0.228952	insig
Lmmn003323	C16H32O3	2-Hydroxyhexadecanoic acid	Organic acids	Organic acids	764-67-0	B	597640	182340	276630	105840	115730	136230	1.18264	0.33863	-1.56222	down
pmb2657	C10H18N4O6	Argininosuccinic acid	Organic acids	Organic acids	2387-71-5	B	264980	225630	227840	101390	103530	120460	1.42792	0.452892	-1.14276	down
pmb0302	C2H8NO3P	2-Aminoethylphosphonate	Lipids	Glycerol ester	2041-14-7	B	11263	16312	13654	13254	30403	43905	0.94698	2.1238	1.08665	insig
mws0752	C11H22O2	Undecylic Acid	Lipids	Free fatty acids	112-37-8	A	608470	432320	437690	403330	558670	474400	0.135699	0.971538	-0.0416572	insig
pmb2640	C12H24O2	Dodecanoic acid (Lauric acid)	Lipids	Free fatty acids	143-07-7	A	96093	98104	85213	83263	84452	124090	0.112911	1.04436	0.0626209	insig
Zmgn003633	C12H20O3	12-Oxo-10E-Dodecenoic Acid	Lipids	Free fatty acids	65410-38-0	B	931.27	1702.1	2940.8	2032.7	3131.9	3463.3	0.835429	1.54784	0.630252	insig
mws5045	C12H24O3	12-Hydroxydodecanoic acid	Lipids	Free fatty acids	505-95-3	A	1687.8	1043	1146	36291	18529	44739	1.41345	25.6807	4.68261	up
pmb2643	C14H26O2	Myristoleic acid	Lipids	Free fatty acids	544-64-9	A	2501.3	3186	2523.5	2691.5	2083.3	2883	0.407084	0.93265	-0.100593	insig
mws0119	C14H28O2	Myristic Acid	Lipids	Free fatty acids	544-63-8	A	16901000	10206000	9584700	7827100	8077500	10213000	0.923854	0.711812	-0.490431	insig
pme2827	C16H32O	Palmitaldehyde	Lipids	Free fatty acids	629-80-1	B	5019100	4797200	4781300	4944300	4873300	5004800	0.553659	1.0154	0.0220479	insig
mws0359	C15H30O2	Pentadecanoic Acid	Lipids	Free fatty acids	1002-84-2	A	133030	117630	127990	91605	84213	137660	0.843221	0.827883	-0.272501	insig
Hmbp003234	C12H14O6	1-O-Caffeoylglycerol	Lipids	Glycerol ester	-	B	49460	60834	60463	54956	42139	67931	0.242254	0.966438	-0.0492514	insig
mws0361	C16H30O2	Palmitoleic Acid	Lipids	Free fatty acids	373-49-9	A	3714.1	3334.7	3449.7	3703.1	2248.2	3420.3	0.591131	0.892661	-0.163816	insig
mws1488	C16H32O2	Palmitic acid	Lipids	Free fatty acids	57-10-3	A	19945	12734	14416	12477	11750	13030	0.922367	0.791103	-0.338062	insig
mws0120	C8H20NO6P	Choline Alfoscerate	Lipids	PC	28319-77-9	B	85955	121870	108270	46582	68423	25115	1.16106	0.443284	-1.1737	down
mws0383	C17H32O2	10-Heptadecenoic Acid	Lipids	Free fatty acids	29743-97-3	A	445190	337160	269090	230870	113540	288150	0.981888	0.601613	-0.733092	insig
pmp001264	C16H35NO2	Hexadecylsphingosine	Lipids	Sphingolipids	-	A	2463500	2497600	2541600	2599400	2342100	2443900	0.367412	0.984366	-0.0227338	insig
pmb1574	C18H28O2	9,12-Octadecadien-6-Ynoic Acid	Lipids	Free fatty acids	61481-29-6	B	51422	31881	38981	22011	22653	26956	1.26603	0.585686	-0.771801	insig
Lmbn005923	C18H30O2	Crepenynic acid	Lipids	Free fatty acids	2277-31-8	A	459140	256350	364380	211670	154990	163830	1.26998	0.491254	-1.02546	down
pmb0889	C18H30O2	Punicic acid (9Z,11E,13Z-octadecatrienoic acid)	Lipids	Free fatty acids	544-72-9	B	234460	201280	192170	268200	214040	371440	0.895955	1.35956	0.443138	insig
mws0367	C18H30O2	α-Linolenic Acid*	Lipids	Free fatty acids	463-40-1	A	28308000	15863000	23776000	12367000	9510000	9177700	1.29382	0.457043	-1.1296	down
mws0366	C18H30O2	γ-Linolenic Acid*	Lipids	Free fatty acids	506-26-3	A	30900000	18204000	22934000	13738000	10072000	10290000	1.30208	0.473361	-1.07899	down
mws1491	C18H32O2	Linoleic acid	Lipids	Free fatty acids	60-33-3	A	53119000	32711000	41434000	27381000	24938000	23690000	1.25616	0.597255	-0.743582	insig
Lmbn006152	C18H32O2	(9Z,11E)-Octadecadienoic acid	Lipids	Free fatty acids	2540-56-9	B	35482	17552	28547	15016	13073	10986	1.22153	0.478972	-1.06199	down
YC512118	C18H35NO	Oleamide (9-Octadecenamide)	Lipids	Free fatty acids	301-02-0	A	13141	7909.4	6354.9	10710	11719	29554	0.828405	1.89682	0.923585	insig
mws2623	C18H34O2	11-Octadecanoic acid(Vaccenic acid)	Lipids	Free fatty acids	506-17-2	A	2653400	1226800	1917400	1504100	1282600	1373200	0.789065	0.717521	-0.478907	insig
Zmyn005026	C18H36O2	16-Methylheptadecanoic acid	Lipids	Free fatty acids	2724-58-5	B	5652100	8723200	6411200	18494000	9158500	7382500	0.887741	1.68547	0.75315	insig
mws1489	C18H36O2	Stearic Acid	Lipids	Free fatty acids	57-11-4	A	13281000	20201000	15062000	28545000	16593000	12939000	0.394645	1.19638	0.258674	insig
mws1436	C18H38O2	1,18-Octadecanediol	Lipids	Free fatty acids	3155-43-9	B	9	9	9	9	9	14697	0.616932	545	9.09011	insig
pmn001686	C16H32O4	10,16-Dihydroxypalmitic acid	Lipids	Free fatty acids	3233-90-7	A	56447	43810	62810	54143	51698	63431	0.226713	1.03805	0.0538785	insig
Zmyn004548	C18H28O3	12-Oxo-phytodienoic acid	Lipids	Free fatty acids	85551-10-6	B	17283	4395	9573.9	4301	1986.4	2679.9	1.14903	0.286936	-1.8012	down
pmb2792	C18H30O3	13-Hydroxy-6,9,11-octadecatrienoic acid	Lipids	Free fatty acids	74784-20-6	B	25342	54197	34577	32839	20145	21861	0.841593	0.655868	-0.608523	insig
pmb2787	C18H30O3	9-Oxo-10E,12Z-octadecadienoic acid	Lipids	Free fatty acids	54232-59-6	A	38537	21741	30883	29362	16286	33869	0.425292	0.87227	-0.197153	insig
pmb2786	C18H30O3	9-Hydroxy-10,12,15-octadecatrienoic acid*	Lipids	Free fatty acids	89886-42-0	B	25601	9074.9	18699	7995.5	6650.3	8035.1	1.14151	0.424936	-1.23468	down
Lmbn005443	C18H30O3	13-KODE; (9Z,11E)-13-Oxooctadeca-9,11-dienoic acid*	Lipids	Free fatty acids	54739-30-9	B	25669	10951	17504	9070.4	5687.4	8807	1.18886	0.435385	-1.19964	down
Zmpn003368	C18H30O3	13S-Hydroxy-9Z,11E,15Z-octadecatrienoic acid	Lipids	Free fatty acids	87984-82-5	B	125380	81260	79466	427970	263620	680950	1.32222	4.79731	2.26223	up
pmb2799	C18H32O3	12,13-Epoxy-9-Octadecenoic Acid	Lipids	Free fatty acids	6799-85-5	B	29735	27904	28764	28554	26899	25455	0.946718	0.936403	-0.094799	insig
Lmbn005369	C18H32O3	13(S)-HODE;13(S)-Hydroxyoctadeca-9Z,11E-dienoic acid*	Lipids	Free fatty acids	10219-69-9	A	253200	201930	200050	304380	234440	382350	1.00254	1.40598	0.491576	insig
Lmbn005662	C18H32O3	9(10)-EpOME;(9R,10S)-(12Z)-9,10-Epoxyoctadecenoic acid	Lipids	Free fatty acids	16833-56-0	A	121080	71035	85805	79889	72923	74221	0.730267	0.816901	-0.291768	insig
Rfmb091	C18H32O3	9S-Hydroxy-10E,12Z-octadecadienoic acid*	Lipids	Free fatty acids	15514-85-9	A	254690	204680	199740	301290	233750	369080	0.992489	1.37173	0.455995	insig
Zmyn004714	C18H34O3	Ricinoleic acid	Lipids	Free fatty acids	141-22-0	A	255980	143640	159770	192200	163440	146420	0.311187	0.897513	-0.155995	insig
Zmgn005057	C18H34O3	9,10-Epoxyoctadecanoic Acid	Lipids	Free fatty acids	2443-39-2	A	419180	249220	413740	327470	182990	409100	0.476006	0.849761	-0.234872	insig
pmf0297	C20H42O	1-Eicosanol	Lipids	Free fatty acids	629-96-9	B	245450	148490	172220	207000	168710	159630	0.183781	0.945563	-0.0807544	insig
Lmqn008288	C18H36O3	3-Hydroxyoctadecanoic Acid	Lipids	Free fatty acids	45261-96-9	B	406030	378320	479120	479440	467820	522220	1.00849	1.16305	0.217914	insig
pmn001610	C20H36O2	Eicosadienoic acid	Lipids	Free fatty acids	5598-38-9	A	93565	24544	45109	49913	21089	45436	0.411945	0.713389	-0.487238	insig
pmb2791	C18H30O4	9-Hydroperoxy-10E,12,15Z-octadecatrienoic acid	Lipids	Free fatty acids	111004-08-1	A	107730	325870	192350	265360	284800	141380	0.318642	1.10478	0.143765	insig
pmn001606	C20H38O2	Eicosenoic acid	Lipids	Free fatty acids	26764-41-0	A	720230	1599400	807180	1057900	1288100	1256700	0.552315	1.1522	0.204387	insig
Zmjn004133	C18H32O4	9S-Hydroperoxy-10E,12Z-octadecadienoic acid	Lipids	Free fatty acids	5502-91-0	A	40881	52459	51402	52508	57920	44575	0.469776	1.07089	0.0988125	insig
Lmbn004685	C18H32O4	5S,8R-DiHODE; (5S,8R,9Z,12Z)-5,8-Dihydroxyoctadeca-9,12-dienoate	Lipids	Free fatty acids	-	A	8181.4	34458	14858	18349	16791	13233	0.0167298	0.841308	-0.249295	insig
Lmbn005287	C18H32O4	7S,8S-DiHODE; (9Z,12Z)-(7S,8S)-Dihydroxyoctadeca-9,12-dienoic acid	Lipids	Free fatty acids	143288-65-7	A	247110	94524	140890	77713	118280	83771	0.907304	0.579793	-0.78639	insig
pmn001689	C18H32O4	9-Hydroxy-12-oxo-15(Z)-octadecenoic acid	Lipids	Free fatty acids	-	B	132450	44435	64239	48834	40018	48902	0.853858	0.571299	-0.807681	insig
pmb2804	C18H32O4	13S-Hydroperoxy-9Z,11E-octadecadienoic acid	Lipids	Free fatty acids	33964-75-9	B	186360	185440	174810	220630	193430	230800	1.16939	1.17974	0.238474	insig
pmf0397	C20H40O2	Arachidic acid	Lipids	Free fatty acids	506-30-9	B	2174700	2138200	3556600	2861200	1673000	3181200	0.0954778	0.980418	-0.028531	insig
Lmbn005487	C18H34O4	12,13-DHOME; (9Z)-12,13-Dihydroxyoctadec-9-enoic acid	Lipids	Free fatty acids	263399-35-5	B	37576	29999	34218	20739	22215	22903	1.38221	0.64697	-0.62823	insig
pmb2221	C18H39NO3	4-Hydroxysphinganine	Lipids	Sphingolipids	554-62-1	A	142010	119730	114700	116620	142150	76670	0.477589	0.891085	-0.166365	insig
Hmqn003054	C18H34O5	9,10,11-Trihydroxy-12-octadecenoic acid	Lipids	Free fatty acids	61911-67-9	A	20419	24757	25660	52006	40538	50171	1.3846	2.01472	1.01058	up
pmn001694	C18H34O5	9,10,13-Trihydroxy-11-Octadecenoic Acid	Lipids	Free fatty acids	29907-57-1	A	381930	370800	376560	790070	563190	717090	1.36364	1.83332	0.874459	insig
Lmbn004240	C18H34O5	9,10-Dihydroxy-12,13-epoxyoctadecanoic acid	Lipids	Free fatty acids	-	B	18983	16859	18152	21989	20117	23173	1.23678	1.209	0.27382	insig
Lmbn003970	C18H34O5	9,12,13-TriHOME; 9(S),12(S),13(S)-Trihydroxy-10(E)-octadecenoic acid	Lipids	Free fatty acids	97134-11-7	A	29783	28959	26339	85452	86039	92280	1.43932	3.10023	1.63238	up
pmp001284	C19H38O4	Monopalmitin	Lipids	Glycerol ester	542-44-9	A	13313	7737.9	8020.9	8182.7	5673.3	5212.1	0.984404	0.655897	-0.608459	insig
pmb1562	C21H34O4	1-Stearidonoyl-Glycerol	Lipids	Glycerol ester	-	B	10262	5019.8	4864.3	4144.5	6451.6	5423.2	0.472381	0.795156	-0.330689	insig
Lmhp011562	C21H36O4	1-α-Linolenoyl-glycerol	Lipids	Glycerol ester	-	A	8559000	3461900	6817300	2286900	940710	1219100	1.2891	0.236047	-2.08285	down
Lmhp011388	C21H36O4	2-α-Linolenoyl-glycerol	Lipids	Glycerol ester	55268-58-1	A	4427800	1629000	3439900	978920	392400	501210	1.30023	0.197177	-2.34244	down
Lmhp012042	C21H38O4	2-Linoleoylglycerol	Lipids	Glycerol ester	3443-82-1	A	770930	408700	584680	204840	129370	121300	1.36127	0.25818	-1.95355	down
Lmhp112042	C21H38O4	1-Linoleoylglycerol	Lipids	Glycerol ester	2277-28-3	A	854620	424300	579230	212270	134650	135910	1.35742	0.259844	-1.94428	down
pmb0296	C21H40O4	1-Oleoyl-Sn-Glycerol	Lipids	Glycerol ester	129784-87-8	A	504820	224030	452970	188030	164630	95801	1.18892	0.379466	-1.39796	down
pmd0152	C19H39O7P	LysoPA 16:0 (2n isomer)	Lipids	Glycerol ester	-	B	12927	9	8102.9	9	9	9	1.03702	0.00128334	-9.60588	down
pmd0153	C19H39O7P	LysoPA 16:0	Lipids	Glycerol ester	22002-85-3	B	21852	9	12310	10555	5548.9	9082.8	0.464347	0.737078	-0.44011	insig
Lmhp008337	C19H40NO7P	LysoPE 14:0(2n isomer)	Lipids	LPE	-	B	32267	13159	21920	9543.7	2923.6	3144.1	1.24648	0.231809	-2.10899	down
pmb0864	C19H40NO7P	LysoPE 14:0	Lipids	LPE	-	B	153900	49416	89175	40734	13343	10102	1.20313	0.219422	-2.18822	down
Lmhp008440	C20H40NO7P	LysoPE 15:1	Lipids	LPE	-	A	7375.1	3975.4	5244.7	1910.6	9	9	1.13573	0.116214	-3.10514	down
Lmhp008273	C20H40NO7P	LysoPE 15:1(2n isomer)	Lipids	LPE	-	B	2526.3	721.77	2042.6	9	9	9	1.43315	0.00510332	-7.61435	down
Lmhp009187	C20H42NO7P	LysoPE 15:0	Lipids	LPE	-	A	85275	28327	46863	19567	11683	8179.7	1.24597	0.245721	-2.0249	down
Lmhp008885	C20H42NO7P	LysoPE 15:0(2n isomer)	Lipids	LPE	-	A	17351	7332.1	11009	5008	2172	1664.7	1.25589	0.247806	-2.01272	down
Lmhp007836	C21H38NO7P	LysoPE 16:3	Lipids	LPE	-	A	61512	39912	58377	33180	14830	7627.5	1.15567	0.348167	-1.52215	down
Lmhp008763	C21H42NO7P	LysoPE 16:1(2n isomer)	Lipids	LPE	-	A	108420	44549	77698	39547	50227	10785	0.940309	0.435949	-1.19777	insig
Lmhp009034	C21H42NO7P	LysoPE 16:1	Lipids	LPE	-	A	212310	92850	148120	91117	73391	24138	1.01919	0.41618	-1.26472	down
pmd0160	C21H44NO7P	LysoPE 16:0(2n isomer)	Lipids	LPE	-	A	3505600	1047700	1790400	924940	288270	297060	1.18825	0.238074	-2.07052	down
pmb0876	C21H44NO7P	LysoPE 16:0	Lipids	LPE	53862-35-4	A	16050000	4390200	7858300	3833400	1268900	1263400	1.19042	0.224948	-2.15233	down
Lmhp009464	C22H44NO7P	LysoPE 17:1(2n isomer)	Lipids	LPE	-	A	43941	15266	23619	11667	5341.7	4331.8	1.22526	0.257655	-1.95649	down
Lmhp009769	C22H44NO7P	LysoPE 17:1	Lipids	LPE	-	A	47945	14824	26116	13811	5006.4	4678.9	1.17805	0.264345	-1.91951	down
pmd0130	C22H46NO7P	LysoPC 14:0	Lipids	LPC	20559-16-4	A	61124	35672	62456	29488	16562	8081.2	1.17256	0.339909	-1.55678	down
Lmhp008233	C23H40NO7P	LysoPE 18:4	Lipids	LPE	-	A	4835.5	3196.9	5840.6	2976.4	1240.7	966.08	1.17198	0.373616	-1.42037	down
Lmhp008589	C23H42NO7P	LysoPE 18:3(2n isomer)	Lipids	LPE	-	A	7425400	3322300	5570900	3428900	2714900	1005700	1.01793	0.43812	-1.1906	down
Lmhp008801	C23H42NO7P	LysoPE 18:3	Lipids	LPE	-	A	4297000	2136300	3382400	2318500	1232300	683050	1.07715	0.431334	-1.21312	down
pmb0874	C23H44NO7P	LysoPE 18:2(2n isomer)	Lipids	LPE	-	A	30136000	13909000	23153000	12314000	9429700	3150100	1.08121	0.370454	-1.43263	down
pmb0881	C23H44NO7P	LysoPE 18:2	Lipids	LPE	-	A	14127000	6364300	10698000	5814700	3138800	1545200	1.14436	0.336612	-1.57084	down
pmb2260	C23H46NO7P	LysoPC 15:1	Lipids	LPC	-	A	16793	10701	17762	4422.7	3193.8	2149.6	1.36633	0.215797	-2.21225	down
mws0289	C23H46NO7P	LysoPE 18:1	Lipids	LPE	89576-29-4	A	3305500	1050700	2073400	1343700	645730	644750	1.04829	0.409696	-1.28738	down
pmb0856	C23H46NO7P	LysoPE 18:1(2n isomer)	Lipids	LPE	-	A	4719700	1315800	2932800	1620600	1027200	776810	1.04305	0.381857	-1.38889	down
pmb0883	C23H48NO7P	LysoPE 18:0	Lipids	LPE	69747-55-3	A	143080	30120	61795	18207	8694.3	7038.2	1.25429	0.144426	-2.79159	down
pmb2319	C23H48NO7P	LysoPC 15:0	Lipids	LPC	108273-89-8	A	119010	66030	100940	46934	43338	29143	1.27675	0.417564	-1.25993	down
pmb0880	C23H48NO7P	LysoPE 18:0(2n isomer)	Lipids	LPE	-	A	42076	13065	27875	16506	8009.1	7614.3	1.06569	0.387027	-1.3695	down
Lmhp009129	C23H48NO7P	LysoPC 15:0(2n isomer)	Lipids	LPC	-	A	40128	18087	33338	10104	14396	7796.6	1.2473	0.352764	-1.50322	down
Hmyn007168	C22H45O9P	LysoPG 16:0	Lipids	Glycerol ester	-	B	9466900	3899600	5776300	3268800	3008700	1779500	1.14865	0.420889	-1.24849	down
pma1303	C24H46NO7P	LysoPC 16:2	Lipids	LPC	-	A	98441	63986	97930	83328	36913	35554	0.980502	0.59839	-0.740842	insig
pmb0863	C24H46NO7P	LysoPC 16:2(2n isomer)	Lipids	LPC	-	A	59912	39258	69082	35483	26309	11034	1.09051	0.432839	-1.2081	down
pmp001270	C24H48NO7P	LysoPC 16:1	Lipids	LPC	76790-27-7	A	423740	265420	419930	227860	252030	116410	1.07292	0.537648	-0.895266	insig
Lmhp008833	C24H48NO7P	LysoPC 16:1(2n isomer)	Lipids	LPC	-	A	592720	296810	570540	223980	295020	73285	1.03304	0.405655	-1.30167	down
pmb0855	C24H50NO7P	LysoPC 16:0	Lipids	LPC	17364-16-8	A	28877000	14161000	23287000	10954000	7244000	6721400	1.27712	0.375717	-1.41228	down
pmd0132	C24H50NO7P	LysoPC 16:0(2n isomer)	Lipids	LPC	-	A	5636200	2519800	4412700	2004700	1185400	1080600	1.25843	0.339789	-1.55729	down
Lmhp010040	C25H46NO7P	LysoPE 20:3	Lipids	LPE	-	A	28262	10231	20161	9047.9	3430.3	2673.9	1.20125	0.25833	-1.95271	down
Lmhp009802	C25H46NO7P	LysoPE 20:3(2n isomer)	Lipids	LPE	-	A	30086	8535.2	20189	10295	4445.9	2541.3	1.09093	0.293864	-1.76678	down
Lmhp010514	C25H48NO7P	LysoPE 20:2(2n isomer)	Lipids	LPE	-	A	28310	10293	16349	10075	3555.5	2382.5	1.1424	0.2914	-1.77893	down
Lmhp008718	C25H48NO7P	LysoPC 17:2	Lipids	LPC	-	A	69809	27594	60204	22672	21267	6269.3	1.10073	0.318566	-1.65033	down
Lmhp010757	C25H48NO7P	LysoPE 20:2	Lipids	LPE	-	A	74464	18250	42091	20163	4987.4	5804.2	1.14343	0.229625	-2.12265	down
Lmhp009590	C25H50NO7P	LysoPC 17:1	Lipids	LPC	-	A	53081	18139	49191	26757	18980	12836	0.917197	0.486442	-1.03966	insig
Lmhp010515	C25H52NO7P	LysoPC 17:0(2n isomer)	Lipids	LPC	-	A	42017	23264	35142	10896	17716	8369.7	1.26211	0.368259	-1.44121	down
pmb2406	C25H52NO7P	LysoPC 17:0	Lipids	LPC	50930-23-9	A	22643	21301	19214	6263.4	10984	3784.3	1.26717	0.333001	-1.5864	down
Lmhp009526	C27H46O9	2-α-Linolenoyl-glycerol-1-O-glucoside	Lipids	Glycerol ester	-	A	80810	71775	106340	63471	91147	33114	0.729582	0.725044	-0.46386	insig
Lmhp009773	C27H46O9	1-α-Linolenoyl-glycerol-3-O-glucoside	Lipids	Glycerol ester	-	A	186970	100590	190430	157590	58032	57857	0.911366	0.572144	-0.80555	insig
Hmqp006235	C26H46NO7P	LysoPC 18:4	Lipids	LPC	-	A	26945	13562	24537	9439.5	12634	4238.6	1.11038	0.404528	-1.30569	down
Lmhp010334	C27H48O9	2-Linoleoylglycerol-1-O-glucoside	Lipids	Glycerol ester	-	A	4686.8	1063.5	4239.7	1761.6	1955.3	1087.6	0.717436	0.480931	-1.0561	insig
Lmhp010573	C27H48O9	1-Linoleoylglycerol-3-O-glucoside	Lipids	Glycerol ester	-	A	6466.7	2140.1	5065.6	3363.3	418.57	1526.2	0.945245	0.388232	-1.36501	insig
pmb0865	C26H48NO7P	LysoPC 18:3(2n isomer)	Lipids	LPC	-	A	15047000	10215000	16865000	10622000	8292000	5050500	1.06228	0.568863	-0.813846	insig
pmb0854	C26H48NO7P	LysoPC 18:3	Lipids	LPC	-	A	14216000	9773900	15629000	10527000	8125500	5197500	1.03942	0.601985	-0.7322	insig
pmp001251	C26H50NO7P	LysoPC 18:2(2n isomer)	Lipids	LPC	-	A	3154300	1505700	2935800	1354900	1158600	392980	1.07756	0.382643	-1.38593	down
pmp001273	C26H50NO7P	LysoPC 18:2	Lipids	LPC	-	A	1409100	876300	1382200	751490	542450	328270	1.19177	0.442308	-1.17688	down
Lmhp010190	C26H52NO7P	LysoPC 18:1(2n isomer)	Lipids	LPC	-	A	45722000	16699000	39712000	24186000	15600000	8544200	0.939139	0.473208	-1.07945	insig
pmp001281	C26H52NO7P	LysoPC 18:1	Lipids	LPC	-	A	16734000	7284800	16048000	10902000	5918500	4901000	0.932381	0.542132	-0.883284	insig
mws0126	C26H54NO7P	LysoPC 18:0	Lipids	LPC	19420-57-6	A	830230	321110	586550	211780	159070	150460	1.29142	0.299967	-1.73712	down
pmd0136	C26H54NO7P	LysoPC 18:0(2n isomer)	Lipids	LPC	-	A	151770	61631	114160	47990	23168	29851	1.25602	0.308367	-1.69728	down
Lmhp007840	C27H52NO7P	LysoPC 19:2	Lipids	LPC	-	A	44823	14032	29432	9621.4	5294	2733.3	1.23348	0.199901	-2.32264	down
Lmhp007598	C27H52NO7P	LysoPC 19:2(2n isomer)	Lipids	LPC	-	A	5566.7	5536.6	6649.5	4825.7	8797.4	6472.4	0.380424	1.13196	0.178826	insig
Lmhp010908	C27H54NO7P	LysoPC 19:1	Lipids	LPC	-	A	36585	7942	22575	11129	8141.8	6167.7	0.948759	0.379102	-1.39934	insig
pmb2228	C27H56NO7P	LysoPC 19:0	Lipids	LPC	108273-88-7	A	3786.2	5280.8	3504.1	4998.7	5552.8	3309.7	0.35246	1.10262	0.140941	insig
Lmhp009890	C28H52NO7P	LysoPC 20:3	Lipids	LPC	1199257-41-4	A	73878	37643	60102	51295	22669	27804	0.957304	0.592974	-0.753959	insig
pmd0147	C28H54NO7P	LysoPC 20:2	Lipids	LPC	-	A	177510	84381	130850	129320	53511	79046	0.79374	0.666793	-0.584689	insig
pmd0146	C28H54NO7P	LysoPC 20:2(2n isomer)	Lipids	LPC	-	A	69907	29820	59599	68548	20125	25928	0.608825	0.719286	-0.475362	insig
Lmhp011549	C28H56NO7P	LysoPC 20:1	Lipids	LPC	-	A	55967	20263	37285	20589	11996	13869	1.14094	0.409232	-1.28901	down
Lmhp008744	C33H56O14	1-α-Linolenoyl-glycerol-2,3-di-O-glucoside	Lipids	Glycerol ester	-	A	206500	112820	200860	101920	51284	33764	1.18547	0.359429	-1.47622	down
Lmhp008513	C33H56O14	2-α-Linolenoyl-glycerol-1,3-di-O-glucoside	Lipids	Glycerol ester	-	A	316490	207920	356140	102080	103070	69515	1.35747	0.311924	-1.68073	down
Lmhp009190	C33H58O14	2-Linoleoylglycerol-1,3-di-O-glucoside	Lipids	Glycerol ester	-	A	26008	8628.5	17743	7093.5	7255.4	2047.1	1.0819	0.313023	-1.67566	down
Lmhp009384	C33H58O14	1-Linoleoylglycerol-2,3-di-O-glucoside	Lipids	Glycerol ester	-	A	13203	7520.5	10402	6151.5	2865.7	3212	1.2472	0.3929	-1.34777	down
