# Supplementary material for: Elucidating the Differentiation Synthesis Mechanisms of Differently Colored Resistance Quinoa Seedings Using Metabolite Profiling and Transcriptome Analysis
Source: Metabolites. 2023 Oct 10;13(10):1065. doi: 10.3390/metabo13101065 (PMC10609267; doi:10.3390/metabo13101065)
Supplement: Supplementary file 1 [file metabolites-13-01065-s001.zip › Table S5.xlsx]

## Sheet: Sheet1
Table S5 All metabolites in R-WvsR-Y
Index	Formula	Compounds	Class I	Class II	CAS	Level	R-W1	R-W2	R-W3	R-Y1	R-Y2	R-Y3	VIP	Fold_Change	Log2FC	Type
pme3200	C2H7N3	1-methylguanidine	Nucleotides and derivatives	Nucleotides and derivatives	471-29-4	B	51021	107940	59709	9	7407.1	1621.1	1.14515	0.041328	-4.59674	down
pmb0782	C5H11N	Piperidine	Alkaloids	Alkaloids	110-89-4	B	5483200	5731700	5319500	6647500	5651100	4543000	0.0619578	1.01858	0.0265585	insig
pme2292	C4H12N2	Putrescine	Alkaloids	Phenolamine	110-60-1	B	48504	96358	91373	18474	24507	22325	1.38594	0.276445	-1.85494	down
pme1987	C3H7NO2	L-Alanine	Amino acids and derivatives	Amino acids and derivatives	56-41-7	B	2453.9	1461.1	9	7282.6	3732.9	565.28	0.682887	2.95127	1.56134	insig
ML10198895	C3H7NO2	N-Methylglycine	Amino acids and derivatives	Amino acids and derivatives	107-97-1	B	18272	17112	15463	20166	22550	14793	0.580402	1.13102	0.177625	insig
pme2601	C3H6O3	3-Hydroxypropanoic acid	Organic acids	Organic acids	503-66-2	B	40550	35778	37515	44275	30196	15535	0.66162	0.790615	-0.338953	insig
Lmqp000873	C4H4O3	Succinic anhydride	Organic acids	Organic acids	108-30-5	B	1569800	1878200	1029700	2383500	1494700	1156600	0.263543	1.12442	0.169177	insig
mws4052	C4H7NO2	1-Aminocyclopropane-1-carboxylic acid	Organic acids	Organic acids	22059-21-8	B	513680	509830	503570	492820	519960	474420	0.63763	0.973885	-0.038177	insig
pme1841	C5H14N2	Cadaverine	Alkaloids	Phenolamine	462-94-2	B	16163	12261	13391	11250	10097	10076	1.24183	0.751477	-0.4122	insig
pme3011	C4H9NO2	γ-Aminobutyric acid	Organic acids	Organic acids	56-12-2	B	258700	177180	523680	436970	450690	348680	0.727739	1.28844	0.365631	insig
pme3017	C4H9NO2	2-Aminoisobutyric acid	Amino acids and derivatives	Amino acids and derivatives	62-57-7	B	2459900	4501300	3770400	1578800	1496600	1423000	1.36123	0.419173	-1.25438	down
pme3033	C4H9NO2	N,N-Dimethylglycine	Amino acids and derivatives	Amino acids and derivatives	1118-68-9	B	273810	358230	508180	328870	309860	265960	0.679288	0.793435	-0.333817	insig
pmb0484	C5H13NO	Choline	Alkaloids	Alkaloids	62-49-7	B	20851000	28952000	26763000	15254000	15319000	14851000	1.38236	0.593266	-0.753249	insig
ML10172161	C3H4O4	Hydroxypyruvic acid	Organic acids	Organic acids	1113-60-6	B	450760	309490	359050	397220	612030	430840	0.880088	1.2866	0.363562	insig
mws0576	C4H8O3	3-Hydroxybutyric acid	Organic acids	Organic acids	300-85-6	B	363730	511230	369670	381320	519540	327900	0.0732837	0.987249	-0.0185138	insig
mws0574	C4H8O3	2-Hydroxyisobutyric acid	Organic acids	Organic acids	594-61-6	A	2193400	1799900	1954900	2112000	2140400	2035000	0.674417	1.05703	0.0800104	insig
pme1975	C3H4O4	Malonic acid	Organic acids	Organic acids	141-82-2	B	1278300	1122300	1243700	1200500	1522100	1122000	0.364937	1.05496	0.0771918	insig
pme0048	C2H7NO2S	2-Aminoethanesulfinic acid	Organic acids	Organic acids	300-84-5	B	2579.2	4147.2	2839.5	3204.9	1900.1	9	0.699172	0.534607	-0.903449	insig
mws0255	C4H5N3O	Cytosine	Nucleotides and derivatives	Nucleotides and derivatives	71-30-7	B	2021600	4700000	3757000	1588800	1975900	1433100	1.16629	0.476953	-1.06808	down
pme0257	C4H4N2O2	Uracil	Nucleotides and derivatives	Nucleotides and derivatives	66-22-8	A	194460	158830	94021	267270	216050	141420	0.766039	1.39666	0.481978	insig
pme0006	C5H9NO2	L-Proline	Amino acids and derivatives	Amino acids and derivatives	147-85-3	B	41086000	39304000	32844000	43104000	35612000	28489000	0.327381	0.946756	-0.078935	insig
mws0376	C4H4O4	Fumaric acid	Organic acids	Organic acids	110-17-8	B	55745	194640	54204	52380	40026	20725	0.972489	0.371422	-1.42887	insig
pme0275	C5H8O3	4-Oxopentanoic Acid	Organic acids	Organic acids	123-76-2	B	12744	16422	13079	4741.2	6876.6	7913	1.36523	0.462322	-1.11303	down
mws0823	C5H8O3	3-Methyl-2-Oxobutanoic acid	Organic acids	Organic acids	759-05-7	B	52394	96473	55644	22968	49129	28496	1.14407	0.491871	-1.02365	down
pme3193	C4H7NO3	N-Acetyl-L-glycine	Amino acids and derivatives	Amino acids and derivatives	543-24-8	B	10101	11138	12680	14347	4421.6	6333.1	0.758108	0.740048	-0.434309	insig
pmb1096	C8H7N	Indole	Alkaloids	Plumerane	120-72-9	A	7706.1	13699	7964.3	14107	14400	8945.3	0.692426	1.27522	0.350741	insig
pme0120	C5H11NO2	5-Aminovaleric acid	Amino acids and derivatives	Amino acids and derivatives	660-88-8	B	15355	10727	21564	12902	11966	19097	0.178864	0.922743	-0.116	insig
mws0256	C5H11NO2	L-Valine	Amino acids and derivatives	Amino acids and derivatives	72-18-4	B	10885000	11259000	8864000	10259000	8655800	7063900	0.84379	0.837806	-0.255311	insig
mws0191	C5H11NO2	Betaine	Alkaloids	Alkaloids	107-43-7	A	550390	637050	580780	680220	594730	596570	0.610565	1.05842	0.0819127	insig
pme1730	C4H6O4	D-Erythronolactone	Organic acids	Organic acids	15667-21-7	B	967580	687280	592580	1051000	622680	507720	0.151756	0.970615	-0.0430283	insig
mws0470	C4H6O4	Methylmalonic acid*	Organic acids	Organic acids	516-05-2	A	4568000	5707200	3391100	6805900	4012500	3085300	0.0444572	1.01737	0.0248462	insig
mws0192	C4H6O4	Succinic acid*	Organic acids	Organic acids	110-15-6	A	4880100	5825000	3277100	6890600	4075700	3066700	0.0684632	1.00363	0.00523209	insig
mws0147	C5H10O3	β-Hydroxyisovaleric acid	Organic acids	Organic acids	625-08-1	B	319050	753490	524140	471020	629920	315050	0.21916	0.886834	-0.173264	insig
pme3096	C3H5NO4	Aminomalonic acid	Organic acids	Organic acids	1068-84-4	B	4146300	5054000	2957600	6161700	3825900	2896000	0.0862245	1.05969	0.0836417	insig
mws0230	C4H9NO3	L-Threonine	Amino acids and derivatives	Amino acids and derivatives	72-19-5	B	1531000	1494400	1339600	1415400	1330900	1156100	0.905926	0.894021	-0.16162	insig
pmp001287	C8H9N	N-Benzylmethylene isomethylamine	Alkaloids	Alkaloids	-	A	8136600	7963800	6429500	15297000	11142000	6170700	0.737047	1.4474	0.53346	insig
pma0134	C4H8O4	D-(-)-Threose	Others	Saccharides and Alcohols	95-43-2	B	97315	213870	142120	85721	80394	48872	1.15521	0.474266	-1.07623	down
pme0195	C3H7NO2S	L-Cysteine	Amino acids and derivatives	Amino acids and derivatives	52-90-4	B	9447.8	8132.6	4347.5	2824.5	6901.9	12853	0.166536	1.02971	0.0422395	insig
pmb0069	C7H7NO	Benzamide	Phenolic acids	Phenolic acids	55-21-0	B	45586000	93791000	74501000	47135000	24667000	11821000	1.11114	0.390985	-1.35482	down
mws0491	C8H11N	Phenethylamine	Alkaloids	Alkaloids	64-04-0	A	14804000	41514000	29508000	16134000	7601900	3274900	1.11014	0.314716	-1.66788	down
pme0241	C7H6O2	Benzoic acid	Phenolic acids	Phenolic acids	65-85-0	B	31569	18646	18529	14025	21788	12472	0.844909	0.702389	-0.509659	insig
Lmbn001930	C7H6O2	2-Hydroxybenzaldehyde (Salicylaldehyde)	Phenolic acids	Phenolic acids	90-02-8	B	35318	47550	41917	29814	38405	21311	0.98913	0.717474	-0.479001	insig
mws0628	C7H6O2	4-Hydroxybenzaldehyde	Phenolic acids	Phenolic acids	123-08-0	B	357620	481620	308800	111880	213260	267020	1.15794	0.515801	-0.955114	insig
mws0133	C6H6N2O	Nicotinamide	Others	Vitamin	98-92-0	A	2706700	2643100	2463000	2506500	2498400	2808400	0.0446949	1.00006	9.2326e-05	insig
ML10179289	C8H10O	2-Phenylethanol	Phenolic acids	Phenolic acids	60-12-8	B	29372000	71299000	52099000	31096000	15435000	6766400	1.10675	0.348873	-1.51922	down
pme1216	C6H5NO2	2-Picolinic acid	Organic acids	Organic acids	98-98-6	B	110440	190210	273540	133420	97584	105370	0.954732	0.585824	-0.771462	insig
Lmbp000668	C6H5NO2	Isonicotinic acid	Organic acids	Organic acids	55-22-1	B	230270	452370	595210	255930	199070	205490	1.04869	0.516876	-0.95211	insig
pme0490	C6H5NO2	Nicotinic acid (Vitamin B3)	Others	Vitamin	59-67-6	B	223470	442580	603040	241350	212380	208670	1.02253	0.521949	-0.93802	insig
mws0566	C7H8O2	4-Methylcatechol	Phenolic acids	Phenolic acids	452-86-8	B	1091.9	353.63	359.07	720.93	712.53	353.46	0.167943	0.990203	-0.014204	insig
pmb0302	C2H8NO3P	2-Aminoethylphosphonate	Lipids	Glycerol ester	2041-14-7	B	29612	14802	20238	18395	10949	13272	0.914982	0.65916	-0.6013	insig
pmp001086	C6H6O3	5-Hydroxymethylfurfural	Phenolic acids	Phenolic acids	67-47-0	B	91684	55772	61483	76239	53492	56808	0.381161	0.892792	-0.163605	insig
NK10264324	C6H6O3	1,3,5-Benzenetriol	Phenolic acids	Phenolic acids	108-73-6	B	43819	18968	34375	65521	21061	9	0.591324	0.891202	-0.166175	insig
pmp000509	C6H6O3	Maltol	Others	Others	118-71-8	B	196710	243050	274520	9	9	9	1.48001	3.78003e-05	-14.6912	down
mws0251	C5H6N2O2	Thymine	Nucleotides and derivatives	Nucleotides and derivatives	65-71-4	B	16463	18658	15915	14741	25000	18258	0.469057	1.13643	0.184513	insig
Lmbn000612	C5H7NO3	1-Pyrroline-4-hydroxy-2-carboxylic acid	Organic acids	Organic acids	9054-77-7	B	2756.3	2473.7	3909.6	3317.1	3017.1	2848.3	0.14368	1.00469	0.00675596	insig
mws0263	C5H7NO3	5-Oxo-L-Proline	Amino acids and derivatives	Amino acids and derivatives	98-79-3	A	2509.7	4978.6	9147.4	5815	15876	4066.1	0.52562	1.5483	0.630688	insig
ML10181668	C6H11NO2	Cycloleucine*	Amino acids and derivatives	Amino acids and derivatives	52-52-8	B	19142000	17673000	22849000	13805000	18163000	9548700	1.00364	0.695842	-0.523169	insig
Rfmb319	C6H11NO2	Pipecolic acid*	Amino acids and derivatives	Amino acids and derivatives	4043-87-2	B	6226800	5548100	7064000	3926000	5431000	2405200	1.04786	0.624357	-0.679557	insig
mws0425	C5H6O4	Citraconic acid	Organic acids	Organic acids	498-23-7	B	38235	44718	24979	34094	49671	41095	0.530003	1.15684	0.210189	insig
Zmpn000638	C4H9N3O2	3-Guanidinopropionic acid	Organic acids	Organic acids	353-09-3	B	24018	25400	35769	28412	24704	21310	0.54739	0.873678	-0.194827	insig
pmp001198	C6H13NO2	6-Deoxyfagomine	Alkaloids	Alkaloids	197449-09-5	A	7063200	7673900	6800100	8681500	7026400	5326300	0.19636	0.976645	-0.0340938	insig
pme0274	C6H13NO2	6-Aminocaproic acid	Organic acids	Organic acids	60-32-2	B	623940	535450	457920	634340	553880	541060	0.489459	1.06923	0.0965752	insig
mws0227	C6H13NO2	L-Leucine*	Amino acids and derivatives	Amino acids and derivatives	61-90-5	A	1473800	1504700	1294900	1817100	1457300	1165600	0.140924	1.03899	0.0551753	insig
mws0258	C6H13NO2	L-Isoleucine*	Amino acids and derivatives	Amino acids and derivatives	73-32-5	A	1444100	1572700	1367700	1744400	1487500	1131600	0.0901345	0.99521	-0.00692653	insig
pme3034	C5H8O4	Ethylmalonic acid	Organic acids	Organic acids	601-75-2	B	14687	31307	12320	9777.9	15079	9252.6	0.882373	0.584928	-0.773669	insig
pme0243	C5H8O4	Glutaric acid	Organic acids	Organic acids	110-94-1	B	407000	763800	429250	296590	433440	199740	0.993149	0.581088	-0.783171	insig
Lmmn000806	C5H8O4	Dimethylmalonic acid*	Organic acids	Organic acids	595-46-0	A	78772	191830	115240	95192	141900	49203	0.537286	0.742001	-0.430508	insig
Lmbn001364	C5H8O4	4-Hydroxy-2-Oxopentanoic Acid*	Organic acids	Organic acids	3318-73-8	B	79721	187120	116750	76675	141610	50675	0.647275	0.701163	-0.512177	insig
Lmbn001288	C5H8O4	2-Hydroxy-2-methyl-3-oxobutanoic acid*	Organic acids	Organic acids	71698-08-3	B	81397	176890	127320	84465	138900	45463	0.670562	0.697155	-0.520448	insig
mws0473	C5H8O4	2-Methylsuccinic acid*	Organic acids	Organic acids	498-21-5	A	952970	2243900	1365600	1051200	1691400	564740	0.585826	0.724901	-0.464144	insig
Lmgn000160	C4H8N2O3	3-Ureidopropionic Acid	Organic acids	Organic acids	462-88-4	B	21395	23378	24393	19955	12708	12065	1.19932	0.646676	-0.628885	insig
Lmrn002746	C6H12O3	2-Hydroxy-4-methylpentanoic acid	Organic acids	Organic acids	498-36-2	A	29228	39550	38748	2745.9	44047	33129	0.615242	0.74328	-0.428023	insig
mws0341	C6H12O3	2-Hydroxyisocaproic acid	Organic acids	Organic acids	20312-37-2	A	9374.7	22492	56338	23207	18524	16644	0.219735	0.661813	-0.595505	insig
mws0972	C6H12O3	6-Hydroxyhexanoic acid	Organic acids	Organic acids	1191-25-9	A	387080	354670	678690	581400	863240	684130	1.02922	1.49867	0.583682	insig
pme2527	C5H12N2O2	L-Ornithine	Amino acids and derivatives	Amino acids and derivatives	70-26-8	B	27232	38732	45651	35326	52627	31678	0.249734	1.07182	0.10006	insig
mws0219	C4H7NO4	L-Aspartic Acid	Amino acids and derivatives	Amino acids and derivatives	56-84-8	A	15376000	17976000	14348000	14055000	15513000	11025000	0.829687	0.851006	-0.232758	insig
mws0275	C4H6O5	L-Malic acid*	Organic acids	Organic acids	97-67-6	A	24547000	54476000	17363000	37641000	30608000	24952000	0.126897	0.966956	-0.0484782	insig
Lmbn000198	C4H6O5	3-Dehydro-L-Threonic Acid*	Organic acids	Organic acids	-	A	8059700	16166000	6797100	11661000	9213400	7908500	0.0535449	0.927798	-0.108117	insig
pmb0374	C5H5N5	2-Aminopurine	Nucleotides and derivatives	Nucleotides and derivatives	452-06-2	A	94635	432720	308470	69177	64912	45513	1.21502	0.21488	-2.2184	down
pme0040	C5H5N5	Adenine	Nucleotides and derivatives	Nucleotides and derivatives	73-24-5	A	10931000	31275000	37704000	23427000	14521000	12021000	0.590559	0.625316	-0.677343	insig
HJKP000649	C8H9NO	N-benzylformamide	Alkaloids	Alkaloids	6343-54-0	B	2164800	2371200	1572100	2106000	1579600	1107500	0.743132	0.784712	-0.349765	insig
mws0889	C4H8O5	D-Threonic Acid	Others	Saccharides and Alcohols	3909-12-4	A	2490400	1823300	1681200	2366500	1096400	704680	0.783106	0.695188	-0.524526	insig
pme0033	C5H4N4O	Hypoxanthine	Nucleotides and derivatives	Nucleotides and derivatives	68-94-0	B	33019	10016	6448.1	14713	35563	46825	0.821355	1.96231	0.97255	insig
Zmyn002919	C8H8O2	2-Methylbenzoic acid	Phenolic acids	Phenolic acids	118-90-1	B	4702.1	4758.7	3420.3	3087.9	422.1	1737	1.0487	0.407341	-1.29569	down
mws1336	C7H7NO2	4-Aminobenzoic acid	Phenolic acids	Phenolic acids	150-13-0	B	2011800	1506300	1228300	1276700	1425500	1351600	0.636955	0.854079	-0.227559	insig
mws1078	C7H7NO2	Anthranilic Acid	Phenolic acids	Phenolic acids	118-92-3	B	303700	558820	416750	290120	281880	217480	1.12139	0.617133	-0.696346	insig
pme2268	C7H7NO2	Trigonelline	Alkaloids	Alkaloids	535-83-1	A	28579000	22194000	24107000	19080000	19349000	19069000	1.27589	0.767869	-0.381069	insig
mws0146	C7H7NO2	Nicotinic Acid Methyl Ester(Methyl Nicotinate)	Alkaloids	Alkaloids	93-60-7	B	103530	30266	42557	88681	88258	50946	0.62214	1.29221	0.36984	insig
pme1002	C8H11NO	L-Tyramine	Amino acids and derivatives	Amino acids and derivatives	51-67-2	A	3717500	8199700	5686900	2349500	2465900	1311600	1.27271	0.348044	-1.52266	down
pma0948	C8H11NO	Phenylethanolamine	Alkaloids	Alkaloids	7568-93-6	B	1391400	3071900	2197000	978610	1019600	524410	1.23355	0.378755	-1.40066	down
Hmgn001653	C7H6O3	Protocatechualdehyde*	Phenolic acids	Phenolic acids	139-85-5	B	1115500	4404100	1593600	1557100	771500	568100	0.931669	0.407229	-1.29609	insig
Lmgn001670	C7H6O3	Salicylic acid	Phenolic acids	Phenolic acids	69-72-7	A	37946	37484	37919	39741	34283	61625	0.543793	1.19674	0.259107	insig
mws0749	C7H6O3	4-Hydroxybenzoic acid	Phenolic acids	Phenolic acids	99-96-7	B	1048900	4082100	1417300	1577700	872090	530140	0.837866	0.455069	-1.13584	insig
Lmbn002862	C7H6O3	3-Hydroxybenzoic Acid	Organic acids	Organic acids	99-06-9	B	688710	3478600	3074600	6381300	1856500	1588200	0.333607	1.35682	0.440234	insig
Lmbn001981	C7H6O3	2,5-Dihydroxybenzaldehyde*	Phenolic acids	Phenolic acids	1194-98-5	B	1085400	4246800	1480900	1387400	779320	598110	0.944078	0.405811	-1.30112	insig
pme1137	C6H5NO3	6-Hydroxynicotinic acid	Alkaloids	Alkaloids	5006-66-6	B	32087	54367	27310	132180	83059	42942	1.04353	2.26944	1.18234	up
pme2828	C6H5NO3	4-Nitrophenol	Phenolic acids	Phenolic acids	100-02-7	B	18902000	19274000	18145000	17396000	15334000	17688000	1.14289	0.89519	-0.159734	insig
mws0704	C2H8NO4P	O-Phosphorylethanolamine	Alkaloids	Alkaloids	1071-23-4	B	32519	18508	27283	29768	48349	33072	0.944928	1.41986	0.505746	insig
pma2987	C6H11N3O	Histidinol	Alkaloids	Alkaloids	501-28-0	B	6598100	6682000	6306000	6047000	6062900	6326800	1.20287	0.941316	-0.0872497	insig
pme3207	C6H6O4	Muconic acid	Organic acids	Organic acids	1119-72-8	A	2251700	2052000	1944700	2254500	2351000	2631400	1.10708	1.1582	0.211885	insig
pmb0764	C6H9NOS	4-Methyl-5-thiazoleethanol	Others	Others	137-00-8	B	4630	4715.5	6700.1	5622	10578	4681.1	0.570146	1.30136	0.38002	insig
Rfmb320	C7H13NO2	1-Methylpiperidine-2-carboxylic acid	Amino acids and derivatives	Amino acids and derivatives	7730-87-2	B	319840	317630	307360	301710	300990	304570	1.2658	0.960247	-0.0585228	insig
mws0103	C9H7NO	Indole-3-carboxaldehyde	Alkaloids	Plumerane	487-89-8	B	56173	61720	57826	57124	72457	81552	0.90974	1.20154	0.264882	insig
pme0295	C6H11NO3	4-Acetamidobutyric acid	Organic acids	Organic acids	3025-96-5	B	19273	21638	29727	57198	17634	24993	0.451966	1.41319	0.498957	insig
mws0567	C5H11N3O2	4-Guanidinobutyric acid	Organic acids	Organic acids	463-00-3	B	165400	208370	167050	166230	138040	141950	1.05944	0.82508	-0.277393	insig
pme2380	C5H6O5	α-Ketoglutaric acid	Organic acids	Organic acids	328-50-7	B	104720	236930	191500	182130	173710	176130	0.150108	0.997787	-0.0031966	insig
mws0208	C6H10O4	Adipic Acid*	Organic acids	Organic acids	124-04-9	B	1136800	1605000	827540	340330	483310	293610	1.36621	0.313013	-1.67571	down
Wmzn000227	C6H10O4	2,2-Dimethylsuccinic acid	Organic acids	Organic acids	597-43-3	A	51027	60352	67849	81279	65450	52155	0.459948	1.10967	0.150131	insig
Lmbn001609	C6H10O4	2-Acetyl-2-Hydroxybutanoic Acid	Organic acids	Organic acids	-	B	165610	226710	121710	42348	65098	37757	1.38115	0.28248	-1.82378	down
mws0924	C6H10O4	2-Methylglutaric acid*	Organic acids	Organic acids	617-62-9	B	985410	1429400	701710	281600	379960	260200	1.38059	0.295766	-1.75747	down
Lmbn001676	C6H10O4	3-Hydroxy-3-Methyl-2-Oxopentanoic Acid	Organic acids	Organic acids	-	B	5961.9	19649	11099	5338.1	12289	2270.8	0.752748	0.542031	-0.883553	insig
pme0193	C5H10N2O3	L-Glutamine	Amino acids and derivatives	Amino acids and derivatives	56-85-9	A	2407100	2695400	3150800	2365900	2442200	1834700	0.976079	0.804866	-0.31318	insig
pme0026	C6H14N2O2	L-Lysine	Amino acids and derivatives	Amino acids and derivatives	56-87-1	B	2580200	2803400	3217200	2346600	2621900	1962400	1.03879	0.805844	-0.311428	insig
pme1691	C7H16NO2	Acetylcholine	Alkaloids	Alkaloids	60-31-1	B	73735	83970	56252	53083	62000	49475	1.018	0.769117	-0.378725	insig
mws1050	C5H9NO4	O-Acetylserine	Amino acids and derivatives	Amino acids and derivatives	5147-00-2	B	719300	912800	955580	574350	990890	667910	0.595284	0.862993	-0.212579	insig
pme0014	C5H9NO4	L-Glutamic acid	Amino acids and derivatives	Amino acids and derivatives	56-86-0	A	70392000	69681000	72733000	69942000	70100000	66646000	0.815467	0.971251	-0.0420842	insig
pmp001285	C8H4O3	Phthalic anhydride	Phenolic acids	Phenolic acids	85-44-9	A	1027400	766580	776860	739960	884270	654570	0.597479	0.886403	-0.173966	insig
pmb2826	C5H8O5	L-Citramalic acid	Organic acids	Organic acids	6236-09-5	A	623900	943610	369580	573450	483400	341040	0.614159	0.721644	-0.47064	insig
Lmbn000216	C5H8O5	3-Methylmalic acid	Organic acids	Organic acids	152204-30-3	A	15637	21194	29410	20620	9783.4	28502	0.364297	0.889259	-0.169325	insig
ML10171848	C5H8O5	D-Arabinono-1,4-lactone	Others	Saccharides and Alcohols	2782-09-4	A	74122	160810	92312	101440	73434	47822	0.754843	0.68052	-0.555291	insig
mws2213	C9H8O2	Cinnamic acid	Phenolic acids	Phenolic acids	140-10-3	A	5057.4	8270.1	18485	15771	34584	32192	1.12325	2.5948	1.37562	up
pme3154	C6H12O4	Mevalonic acid	Organic acids	Organic acids	150-97-0	B	221800	280300	478620	386770	964220	1011800	1.09542	2.40924	1.26858	up
Lmgp000796	C8H7NO2	4-Hydroxymandelonitrile	Alkaloids	Alkaloids	13093-65-7	A	5968900	5969900	6876900	6298400	7621000	5490200	0.204458	1.03156	0.0448334	insig
pme1210	C5H11NO2S	L-Methionine	Amino acids and derivatives	Amino acids and derivatives	63-68-3	A	5695400	5806100	6643200	6352200	7497000	5487600	0.438027	1.0657	0.0918009	insig
mws0847	C6H7N5	1-Methyladenine	Nucleotides and derivatives	Nucleotides and derivatives	5142-22-3	B	106990	120720	87591	95635	119210	95052	0.0952772	0.982861	-0.024941	insig
mws0262	C4H6O6	L-Tartaric acid	Organic acids	Organic acids	87-69-4	B	959090	1344800	810980	882680	781310	725920	0.919685	0.767258	-0.382216	insig
Zmgn000173	C5H10O5	D-Ribose	Others	Saccharides and Alcohols	50-69-1	B	222420	198140	177920	170180	143130	127110	1.2157	0.735898	-0.442423	insig
mws1499	C5H10O5	D-Arabinose	Others	Saccharides and Alcohols	10323-20-3	B	270860	433860	284530	431840	338760	221100	0.0288215	1.00248	0.0035686	insig
Lmxp001668	C9H10O2	2-Methoxy-4-ethenylphenol	Phenolic acids	Phenolic acids	7786-61-0	A	145100	109600	25633	529010	617560	458980	1.28843	5.7273	2.51785	up
pme0183	C5H5N5O	Isoguanine	Nucleotides and derivatives	Nucleotides and derivatives	3373-53-3	B	143840	205570	239360	157090	204540	132120	0.565452	0.838613	-0.253923	insig
pme1109	C5H5N5O	Guanine	Nucleotides and derivatives	Nucleotides and derivatives	73-40-5	A	301260	986570	1152000	287520	258440	244550	1.11479	0.324002	-1.62593	down
pme0256	C5H4N4O2	Xanthine	Nucleotides and derivatives	Nucleotides and derivatives	69-89-6	A	44882	26362	26123	23747	26438	27674	0.684616	0.799645	-0.322569	insig
mws0182	C8H8O3	p-Hydroxyphenyl acetic acid	Phenolic acids	Phenolic acids	156-38-7	B	7022.1	5936.8	9	9	4757.6	3568.3	0.0938855	0.642733	-0.637708	insig
pme2362	C8H8O3	Mandelic acid	Phenolic acids	Phenolic acids	90-64-2	B	44417	33312	28606	100870	100070	108520	1.43563	2.91024	1.54114	up
mws0458	C8H8O3	Vanillin	Phenolic acids	Phenolic acids	121-33-5	B	16679	44362	45089	139460	190800	273390	1.35714	5.68784	2.50788	up
pme0513	C5H12O5	Xylitol	Others	Saccharides and Alcohols	87-99-0	A	18177	35727	13689	23463	18666	18941	0.08373	0.903496	-0.14641	insig
mws0437	C5H12O5	D-Arabitol	Others	Saccharides and Alcohols	488-82-4	A	65064	77357	64719	68778	59127	51070	0.864005	0.864029	-0.210848	insig
mws0444	C7H7NO3	3-Aminosalicylic acid	Phenolic acids	Phenolic acids	570-23-0	B	6682.7	15161	19069	9529.9	8634.2	10639	0.560669	0.704014	-0.506325	insig
mws0596	C7H7NO3	3-Hydroxyanthranilic acid	Organic acids	Organic acids	548-93-6	B	22919	22073	8451.5	20844	31777	29716	0.85045	1.54064	0.623526	insig
mws0183	C7H6O4	3,4-Dihydroxybenzoic acid (Protocatechuic acid)*	Phenolic acids	Phenolic acids	99-50-3	A	21305	28042	15342	41818	61613	65303	1.33284	2.60839	1.38316	up
mws0885	C7H6O4	2,4-Dihydroxybenzoic acid	Phenolic acids	Phenolic acids	89-86-1	A	175110	387950	671290	343870	191620	176130	0.666175	0.576514	-0.794573	insig
mws0180	C7H6O4	2,5-Dihydroxybenzoic acid; Gentisic Acid*	Phenolic acids	Phenolic acids	490-79-9	A	25741	30532	13132	26881	30285	33434	0.745322	1.30538	0.384471	insig
mws0639	C7H6O4	2,3-Dihydroxybenzoic Acid*	Organic acids	Organic acids	303-38-8	A	340530	700240	1008800	538690	440230	364740	0.654317	0.655581	-0.609153	insig
mws0254	C6H9N3O2	L-Histidine	Amino acids and derivatives	Amino acids and derivatives	71-00-1	B	674820	835030	1263700	635600	767960	423330	0.906091	0.658683	-0.602344	insig
pmb0819	C10H8N2	3-Indoleacetonitrile	Alkaloids	Plumerane	771-51-7	B	21910	31383	21476	25665	31460	15977	0.12812	0.977705	-0.0325294	insig
Lmbn001467	C7H13NO3	5-Acetamidopentanoic Acid	Organic acids	Organic acids	1072-10-2	B	45374	49509	48582	78977	63749	54362	1.20697	1.37377	0.458141	insig
mws0987	C10H8O2	6-MethylCoumarin	Lignans and Coumarins	Coumarins	92-48-8	B	11021	5031.8	6878.9	4428.7	8670.2	8320.9	0.131876	0.934069	-0.0983983	insig
Zmjn001813	C7H12O4	Pimelic acid*	Organic acids	Organic acids	111-16-0	B	20967	31784	19466	132640	48714	49176	1.21761	3.19218	1.67454	up
Lmbn002072	C7H12O4	2-Propylsuccinic acid*	Organic acids	Organic acids	618-57-5	B	29773	38582	16813	114900	25966	35829	0.706941	2.07466	1.05288	insig
pme0128	C6H12N2O3	L-Alanyl-L-Alanine	Amino acids and derivatives	Amino acids and derivatives	1948-31-8	B	7475	11465	16295	19296	11590	7613.2	0.160213	1.09264	0.127819	insig
mws0005	C10H12N2	Tryptamine	Alkaloids	Plumerane	61-54-1	A	9835200	23290000	13673000	1286800	1859100	2323700	1.42948	0.116876	-3.09695	down
mws1417	C9H7NO2	Indole-3-carboxylic acid	Alkaloids	Plumerane	771-50-6	B	21701	31463	27161	21322	30429	27112	0.0935009	0.981799	-0.0265005	insig
pme3382	C6H11NO4	N-Acetyl-L-threonine	Amino acids and derivatives	Amino acids and derivatives	17093-74-2	A	93108	126200	126540	118320	87735	72833	0.793516	0.806389	-0.310452	insig
mws1346	C6H11NO4	DL-2-Aminoadipic acid	Alkaloids	Alkaloids	542-32-5	B	104420	157410	131620	141440	147510	90846	0.150909	0.965297	-0.0509556	insig
pme2761	C5H6O6	4-Hydroxy-2-oxoglutaric acid	Organic acids	Organic acids	1187-99-1	B	68647	55009	47540	63209	42855	26097	0.708297	0.771986	-0.373352	insig
pme2914	C6H10O5	3-Hydroxy-3-methylpentane-1,5-dioic acid	Amino acids and derivatives	Amino acids and derivatives	503-49-1	A	123320	222950	248980	116910	182480	92052	0.833992	0.657609	-0.604697	insig
pmf0440	C10H10O2	4-MethoxycinnaMaldehyde	Phenolic acids	Phenolic acids	1963-36-6	B	225730	180870	178010	206210	178040	179420	0.26111	0.964181	-0.0526237	insig
pme2758	C5H9NO5	4-Hydroxy-L-glutamic acid	Amino acids and derivatives	Amino acids and derivatives	3913-68-6	A	40438	60205	68309	27379	24163	11600	1.25221	0.373727	-1.41994	down
Lmbp000123	C6H13NO2S	L-Homomethionine	Amino acids and derivatives	Amino acids and derivatives	25148-30-5	B	87365	155730	295490	39607	29813	18575	1.32544	0.163382	-2.61368	down
pme1419	C6H13NO2S	L-Methionine methyl ester	Amino acids and derivatives	Amino acids and derivatives	10332-17-9	A	158720	102870	94555	127300	119150	95134	0.0795992	0.959115	-0.0602243	insig
mws1641	C6H4N4O2	Lumazine	Nucleotides and derivatives	Nucleotides and derivatives	487-21-8	B	7829.4	21193	12578	8798.3	9083.6	10939	0.672695	0.692803	-0.529482	insig
pme1439	C9H8O3	p-Coumaric acid	Phenolic acids	Phenolic acids	501-98-4	A	5277700	3980600	2601600	846230	1534100	2173100	1.22812	0.383935	-1.38107	down
pmb0142	C9H8O3	Caffeic aldehyde	Phenolic acids	Phenolic acids	141632-15-7	B	117210	101910	122920	101640	119270	165090	0.459913	1.12852	0.174436	insig
mws0159	C9H8O3	Phenylpyruvic acid	Organic acids	Organic acids	156-06-9	B	302470	169580	145420	81805	101420	122340	1.18786	0.494866	-1.01489	down
pme2529	C6H12O5	1,5-Anhydro-D-glucitol	Others	Saccharides and Alcohols	154-58-5	B	77177	93225	88635	59476	58722	49760	1.38282	0.648394	-0.625058	insig
pme3083	C8H7NO3	2-(Formylamino)benzoic acid	Phenolic acids	Phenolic acids	3342-77-6	B	191890	435020	466040	116970	100070	108300	1.32209	0.297671	-1.74821	down
pme0021	C9H11NO2	L-Phenylalanine	Amino acids and derivatives	Amino acids and derivatives	63-91-2	A	17523000	16051000	13275000	31614000	22309000	12686000	0.701992	1.42178	0.507699	insig
pmb0037	C10H15NO	Hordenine	Alkaloids	Alkaloids	539-15-1	B	534380	176930	210840	197280	345100	302320	0.0268653	0.916011	-0.126562	insig
pme0281	C8H6O4	Terephthalic acid	Phenolic acids	Phenolic acids	100-21-0	A	634870	908490	618890	360420	464450	328600	1.31566	0.533458	-0.906553	insig
pme0282	C8H6O4	Phthalic acid	Organic acids	Organic acids	88-99-3	A	105360	178620	114000	68547	98641	65126	1.16007	0.583733	-0.77662	insig
pmc0274	C6H6N4S	6-Methylmercaptopurine	Nucleotides and derivatives	Nucleotides and derivatives	50-66-8	B	19103000	18300000	14396000	33343000	24445000	13575000	0.647701	1.37769	0.462252	insig
mws0344	C5H10O6	D-Xylonic acid	Organic acids	Organic acids	526-91-0	A	4037500	5216700	4517500	2331800	1545400	997410	1.33385	0.353958	-1.49835	down
pme3381	C9H10O3	3-Hydroxyphenylacetic Acid Methyl Ester	Phenolic acids	Phenolic acids	42058-59-3	B	1132	1289.4	2851.5	4658.3	11547	6050	1.31308	4.22069	2.07748	up
mws0467	C9H10O3	3-(4-Hydroxyphenyl)-propionic acid	Phenolic acids	Phenolic acids	501-97-3	B	93949	85992	90658	25552	58560	76191	1.02186	0.592401	-0.755355	insig
pmn001681	C10H14O2	1-(4-Methoxyphenyl)-1-propanol	Phenolic acids	Phenolic acids	5349-60-0	B	15440	10682	10088	10447	16134	8923	0.0906044	0.980503	-0.0284066	insig
NK10253223	C8H9NO3	2-Amino-3-methoxybenzoic acid	Phenolic acids	Phenolic acids	3177-80-8	B	231680	230530	226930	103630	140170	104550	1.41699	0.505485	-0.98426	insig
Zmjp000624	C8H9NO3	Pyridoxal	Others	Vitamin	66-72-8	A	226490	240270	229040	95589	134070	130630	1.40863	0.517805	-0.949518	insig
Hmtp000776	C8H9NO3	4,5,6-Trihydroxy-2-cyclohexen-1-ylideneacetonitrile	Alkaloids	Alkaloids	-	B	328320	312740	232740	640430	434830	239430	0.735556	1.50457	0.589348	insig
mws2125	C3H5O6P	Phosphoenolpyruvate	Organic acids	Organic acids	138-08-9	B	133130	84420	169280	74319	116090	162390	0.239605	0.912026	-0.132853	insig
mws0028	C8H8O4	Vanillic acid	Phenolic acids	Phenolic acids	121-34-6	B	47760	393660	83122	116410	44048	40604	0.642282	0.38331	-1.38342	insig
Hmbp001276	C8H8O4	Gallacetophenone	Phenolic acids	Phenolic acids	528-21-2	B	125800	132080	97885	7474.6	22208	17536	1.40969	0.132724	-2.9135	down
pme1292	C8H8O4	Homogentisic acid	Phenolic acids	Phenolic acids	451-13-8	B	49767	82236	43221	39888	45512	40197	0.897149	0.71678	-0.480398	insig
pme2598	C8H8O4	3,4-Dihydroxybenzeneacetic acid	Phenolic acids	Phenolic acids	102-32-9	B	11075	69229	60900	55582	12247	11202	0.52867	0.559694	-0.83729	insig
pme1383	C8H11NO3	Pyridoxine	Others	Vitamin	65-23-6	A	1059400	1100200	1128600	256620	881100	851220	0.92112	0.604872	-0.725298	insig
pme0181	C7H11N3O2	3-Methyl-L-Histidine	Amino acids and derivatives	Amino acids and derivatives	368-16-1	B	25102	38386	35989	29680	36151	29494	0.146696	0.958262	-0.0615084	insig
Zmzn000078	C3H7O6P	Dihydroxyacetone phosphate	Others	Saccharides and Alcohols	57-04-5	B	46101	133580	70995	109810	166680	78227	0.687346	1.41504	0.500845	insig
pme3186	C3H7O6P	DL-Glyceraldehyde-3-phosphate	Organic acids	Organic acids	591-59-3	B	17899	41277	25667	43789	94602	67801	1.18945	2.43028	1.28112	up
mws0024	C7H6O5	Gallic acid	Tannins	Tannin	149-91-7	B	41987	62184	54515	65997	39656	46997	0.199082	0.961963	-0.0559473	insig
Lmbn003524	C9H16O3	9-Oxononanoic acid	Organic acids	Organic acids	2553-17-5	B	10359	10099	9091.7	9649	8856.2	9466.5	0.752493	0.946598	-0.0791755	insig
pme0253	C8H15NO3	N-Acetyl-L-leucine	Amino acids and derivatives	Amino acids and derivatives	1188-21-2	A	53358	61417	76182	93947	88006	68544	1.05028	1.3118	0.391546	insig
MA10039492	C6H6O6	Dehydroascorbic acid	Others	Vitamin	490-83-5	A	931190	986890	1366300	1105500	1020600	647410	0.565175	0.844455	-0.243908	insig
pme3009	C6H6O6	Trans-Citridic acid	Organic acids	Organic acids	4023-65-8	B	480060	552930	532290	459220	535610	381630	0.776448	0.87937	-0.185458	insig
Lmgn002555	C8H14O4	2-Propylglutaric acid	Organic acids	Organic acids	32806-62-5	A	96264	154260	128020	25129	272980	143680	0.221619	1.16707	0.222896	insig
mws0242	C8H14O4	Suberic Acid	Organic acids	Organic acids	505-48-6	B	151460	162920	75910	43590	49129	36312	1.33592	0.330603	-1.59683	down
Zmyn000155	C7H14N2O3	N-α-Acetyl-L-ornithine	Amino acids and derivatives	Amino acids and derivatives	6205-08-9	B	41392	33064	54599	48610	48989	29048	0.0437555	0.981341	-0.0271731	insig
mws0260	C6H14N4O2	L-Arginine	Amino acids and derivatives	Amino acids and derivatives	74-79-3	A	63161	86839	164960	86288	202630	101990	0.4415	1.24114	0.31166	insig
pme2559	C6H9NO5	N-Acetyl-L-Aspartic Acid	Amino acids and derivatives	Amino acids and derivatives	997-55-7	A	34519	56545	38458	29785	18140	11627	1.18013	0.459783	-1.12098	down
pme1651	C10H9NO2	Indole 3-acetic acid (IAA)	Alkaloids	Plumerane	87-51-4	B	31741	35885	19126	20544	17709	13801	1.09633	0.600032	-0.736888	insig
mws4175	C6H8O6	D-Glucurono-6,3-lactone	Others	Saccharides and Alcohols	32449-92-6	B	2845800	2039300	2148100	3075800	2590400	2493600	0.804976	1.16018	0.214353	insig
Hmfn000531	C6H8O6	L-Ascorbic acid (Vitamin C)	Others	Vitamin	50-81-7	A	2600100	4671800	4732100	4510100	3677200	2627200	0.253143	0.900908	-0.150548	insig
pmb3101	C7H12O5	2-Isopropylmalic Acid	Organic acids	Organic acids	49601-06-1	A	741180	834010	528290	1306800	960850	786580	0.996604	1.45199	0.538031	insig
Zmgn001448	C7H12O5	2-Propylmalic Acid*	Organic acids	Organic acids	-	A	731850	881250	541930	1492300	1100900	874200	1.10226	1.60898	0.686146	insig
Lmbn001754	C7H12O5	3-Isopropylmalic Acid*	Organic acids	Organic acids	921-28-8	A	745230	855630	588040	1431000	1027400	891890	1.12351	1.53058	0.61408	insig
pmb0774	C10H12N2O	N-Hydroxytryptamine*	Alkaloids	Phenolamine	-	A	4116600	4784500	3845200	787860	716050	1589800	1.40887	0.242714	-2.04267	down
pme2024	C10H12N2O	Serotonin*	Alkaloids	Plumerane	50-67-9	A	5173200	5863800	4746000	1030200	1060500	2053200	1.41442	0.262555	-1.92931	down
pmb0468	C6H11NO3S	N-Formyl-L-Methionine	Amino acids and derivatives	Amino acids and derivatives	4289-98-9	B	125610	158680	126840	24420	22186	59326	1.36787	0.257661	-1.95646	down
mws1013	C9H6O4	Esculetin	Lignans and Coumarins	Coumarins	305-01-1	A	220520	83165	67967	48774	8958.7	9	0.900702	0.155365	-2.68627	insig
pme1021	C6H10O6	D-Glucono-1,5-lactone	Others	Saccharides and Alcohols	90-80-2	B	13257	15678	10401	20530	14304	20639	1.02696	1.41023	0.495935	insig
mws0009	C10H10O3	Coniferaldehyde	Phenolic acids	Phenolic acids	20649-42-7	B	26800	16015	62845	99813	187610	145930	1.29966	4.10139	2.03611	up
pmb2795	C10H10O3	4-Methoxycinnamic acid*	Phenolic acids	Phenolic acids	830-09-1	A	427630	266890	124640	240840	138310	99356	0.714779	0.584142	-0.775608	insig
mws1195	C10H10O3	p-Coumaric acid methyl ester*	Phenolic acids	Phenolic acids	3943-97-3	A	662810	375130	178100	320580	176280	117800	0.814994	0.50546	-0.98433	insig
pmb0786	C6H13NO5	D-Glucosamine	Others	Saccharides and Alcohols	3416-24-8	B	94914	67402	86998	92873	43459	79017	0.517762	0.863766	-0.211287	insig
mws2212	C9H8O4	Caffeic acid	Phenolic acids	Phenolic acids	331-39-5	A	436900	1329500	819360	1260200	622350	463370	0.151663	0.907246	-0.140435	insig
pme0516	C6H12O6	Inositol	Others	Saccharides and Alcohols	87-89-8	B	214400	199450	175840	152280	155140	95749	1.11907	0.683697	-0.548572	insig
mws1164	C6H12O6	D-Fructose*	Others	Saccharides and Alcohols	7660-25-5	A	1371800	1269200	1070400	1701000	1186500	864690	0.0649321	1.01099	0.0157694	insig
mws4170	C6H12O6	D-Glucose*	Others	Saccharides and Alcohols	14431-43-7	A	1212600	1293700	1057700	1867800	935860	939070	0.0118681	1.05015	0.0705936	insig
mws0250	C9H11NO3	L-Tyrosine	Amino acids and derivatives	Amino acids and derivatives	60-18-4	A	1976100	2341100	1428900	1858400	1337300	924160	0.85518	0.716984	-0.479988	insig
Lmrn001951	C9H10O4	(S)-2-Hydroxy-3-(4-Hydroxyphenyl)Propanoic Acid	Phenolic acids	Phenolic acids	23508-35-2	B	10469	7389.5	5677.4	9	9	9	1.4789	0.00114718	-9.76769	down
mws1350	C9H10O4	Syringaldehyde; 4-Hydroxy-3,5-Dimethoxybenzaldehyde	Phenolic acids	Phenolic acids	134-96-3	B	9	9	9	9	9	5526.1	0.63567	205.337	7.68185	insig
mws0214	C6H14O6	D-Sorbitol	Others	Saccharides and Alcohols	50-70-4	B	13297	17094	7094.6	14724	13641	7515.9	0.0510093	0.957192	-0.0631204	insig
pme2237	C6H14O6	Dulcitol	Others	Saccharides and Alcohols	608-66-2	B	10909	9842.4	5418.4	8973.3	11774	12801	0.720286	1.28195	0.358337	insig
pme2596	C8H9NO4	4-Pyridoxic acid	Others	Vitamin	82-82-6	A	470030	477330	481140	212160	282480	258200	1.43115	0.527014	-0.924086	insig
pme2602	C3H8NO6P	O-Phospho-L-serine	Amino acids and derivatives	Amino acids and derivatives	407-41-0	B	8555.9	20438	10659	20568	20183	17631	0.951189	1.47233	0.558097	insig
Zmgn000447	C3H7O7P	3-Phospho-D-glyceric acid	Others	Saccharides and Alcohols	820-11-1	B	400160	265740	513640	391760	518150	617290	0.766583	1.29474	0.372665	insig
mws0752	C11H22O2	Undecylic Acid	Lipids	Free fatty acids	112-37-8	A	421030	406510	568050	421890	453470	469650	0.155704	0.963757	-0.0532583	insig
mws0237	C9H16O4	Azelaic acid	Organic acids	Organic acids	123-99-9	A	966960	1049600	926180	1056400	861630	956470	0.291357	0.976811	-0.0338491	insig
pme0122	C8H16N2O3	N6-Acetyl-L-lysine	Amino acids and derivatives	Amino acids and derivatives	692-04-6	A	56113	75334	47151	57747	80883	43617	0.0307927	1.02043	0.0291791	insig
mws0736	C8H16N2O3	N-Glycyl-L-leucine*	Amino acids and derivatives	Amino acids and derivatives	869-19-2	B	266020	603260	973600	363910	303910	332100	0.784615	0.542586	-0.882078	insig
mws5041	C8H16N2O3	L-Glycyl-L-isoleucine*	Amino acids and derivatives	Amino acids and derivatives	19461-38-2	B	209990	469050	841140	294090	251840	267650	0.743691	0.535187	-0.901886	insig
Zmjp000182	C7H16N4O2	N-Monomethyl-L-arginine	Amino acids and derivatives	Amino acids and derivatives	17035-90-4	B	96000	59188	58548	53128	50765	29681	1.00703	0.624949	-0.678191	insig
pme3388	C7H16N4O2	Homoarginine	Amino acids and derivatives	Amino acids and derivatives	156-86-5	B	7843.3	6262.5	12838	9005.2	77169	73484	1.04356	5.9256	2.56696	up
Zmtn001624	C10H7NO3	N-Acetylisatin	Alkaloids	Plumerane	574-17-4	A	702140	746890	557250	174350	151290	93713	1.42901	0.20902	-2.25829	down
pme0075	C7H11NO5	N-Acetyl-L-glutamic acid	Amino acids and derivatives	Amino acids and derivatives	1188-37-0	A	1636600	1526400	1558000	1430100	1081200	1265600	1.20147	0.800021	-0.32189	insig
pme0278	C7H14N2O4	2,6-Diaminooimelic acid	Amino acids and derivatives	Amino acids and derivatives	583-93-7	B	18992	34169	37768	5503.8	7228.4	3073.9	1.37771	0.173829	-2.52426	down
pmb2561	C7H13NO3S	N-Acetyl-L-methionine	Amino acids and derivatives	Amino acids and derivatives	65-82-7	B	11418	5726.8	16791	19697	9750.5	10391	0.393588	1.17394	0.231355	insig
Zmyn000453	C6H8O7	Isocitric Acid	Organic acids	Organic acids	320-77-4	A	5956000	10895000	7446000	6662600	7449100	6628900	0.508561	0.853628	-0.228321	insig
mws0281	C6H8O7	Citric Acid	Organic acids	Organic acids	77-92-9	A	4002600	6814700	4898600	5663900	5703300	4299100	0.0514797	0.996844	-0.0045604	insig
Hmjp002337	C10H8O4	Isoscopoletin (6-Hydroxy-7-Methoxycoumarin)	Lignans and Coumarins	Coumarins	776-86-3	B	102550	177330	296560	135720	119720	52650	0.841695	0.53447	-0.903819	insig
Cmpp003619	C10H8O4	6,7-Dihydroxy-4-methylcoumarin	Lignans and Coumarins	Coumarins	529-84-0	B	98177	371510	407960	168520	187470	69897	0.720592	0.48526	-1.04317	insig
pme2993	C10H8O4	Scopoletin (7-Hydroxy-5-methoxycoumarin)	Lignans and Coumarins	Coumarins	92-61-5	B	87088	289990	365360	158720	109220	55806	0.833834	0.436058	-1.19741	insig
mws0277	C7H12O6	Quinic Acid	Organic acids	Organic acids	77-95-2	A	1708300	2917700	2467900	2090300	2365300	1952700	0.346997	0.903354	-0.146637	insig
mws1189	C6H10O7	D-Galacturonic acid*	Organic acids	Organic acids	685-73-4	B	25146	49642	31359	17387	16874	7560.4	1.20202	0.393995	-1.34375	down
pme3705	C6H10O7	D-Glucoronic acid*	Others	Saccharides and Alcohols	6556-12-3	B	42438	34340	37431	16262	12937	6114.3	1.32047	0.309199	-1.69339	down
Xmgn006542	C10H10O4	Dimethyl Phthalate	Phenolic acids	Phenolic acids	131-11-3	B	51157	15782	19573	42189	32226	29805	0.579322	1.20469	0.26866	insig
mws0014	C10H10O4	Ferulic acid	Phenolic acids	Phenolic acids	537-98-4	A	787950	3046200	2570100	975870	1723800	1285600	0.531292	0.622285	-0.684352	insig
Lmdn003756	C10H10O4	Methyl caffeate	Phenolic acids	Phenolic acids	3843-74-1	A	96931	170920	431690	37905	3744.5	2155.8	1.2693	0.0626201	-3.99723	down
pme0534	C6H12O7	Gluconic acid	Others	Saccharides and Alcohols	526-95-4	A	165130	213420	144420	192830	137500	80515	0.673386	0.7856	-0.348134	insig
Lmlp002205	C11H16O3	Isololiolide	Terpenoids	Terpene	38274-00-9	B	34895	6892.4	9687.1	32780	30471	21923	0.887304	1.65468	0.726555	insig
pme3827	C9H11NO4	3,4-Dihydroxy-L-phenylalanine (L-Dopa)	Amino acids and derivatives	Amino acids and derivatives	59-92-7	B	21334	16640	13999	29232	17914	19827	0.790263	1.28861	0.365817	insig
pmb2497	C9H10O5	4-Hydroxy-3-methoxymandelate	Phenolic acids	Phenolic acids	55-10-7	B	152230	163070	206690	157450	203770	168390	0.130784	1.0146	0.0209082	insig
mws0027	C9H10O5	Syringic acid	Phenolic acids	Phenolic acids	530-57-4	B	3029	1793.9	2238.4	5450.4	9	5717.7	0.436689	1.58287	0.66254	insig
Zmzn000079	C4H9O7P	D-Erythrose-4-phosphate	Others	Saccharides and Alcohols	585-18-2	B	117650	143950	140170	51615	76460	65221	1.39535	0.481111	-1.05556	down
pmb2640	C12H24O2	Dodecanoic acid (Lauric acid)	Lipids	Free fatty acids	143-07-7	A	74272	90063	69687	81650	129670	77990	0.702757	1.23625	0.305972	insig
mws5037	C9H18N2O3	L-Alanyl-L-leucine	Amino acids and derivatives	Amino acids and derivatives	3303-34-2	B	78966	42755	38502	55909	83526	64342	0.72029	1.27183	0.34691	insig
NK10251888	C8H18N4O2	NG,NG-Dimethyl-L-arginine	Amino acids and derivatives	Amino acids and derivatives	30315-93-6	A	87335	71968	73123	110120	80961	89375	0.948513	1.20665	0.271003	insig
mws0018	C10H26N4	Spermine	Alkaloids	Phenolamine	71-44-3	B	6052200	6804800	6389400	5712000	5916700	5775100	1.21311	0.904263	-0.145186	insig
mws0282	C11H12N2O2	L-Tryptophan	Amino acids and derivatives	Amino acids and derivatives	73-22-3	A	4261000	4959200	4424000	5387800	5575500	2814000	0.0842568	1.00976	0.0140054	insig
Zmtn001464	C10H7NO4	4,8-Dihydroxyquinoline-2-carboxylic acid	Organic acids	Organic acids	59-00-7	B	59538	50254	39310	27644	12213	11616	1.30217	0.34522	-1.53441	down
pmb0818	C11H11NO3	Methoxyindoleacetic acid	Alkaloids	Plumerane	3471-31-6	B	415910	473810	410890	590160	490690	238300	0.117663	1.01425	0.0204202	insig
pme1261	C9H19NO4	D-Panthenol	Others	Saccharides and Alcohols	81-13-0	B	23956	12551	105390	23540	56027	249990	0.571023	2.32251	1.21568	insig
mws4173	C11H10O4	5,7-Dimethoxycoumarin (Limettin)(Citropten)	Lignans and Coumarins	Coumarins	487-06-9	B	9	9	9	251740	316390	178720	1.48065	27661.1	14.7556	up
pmb1587	C13H18O2	4-Hydroxy-3,5-diisopropylbenzaldehyde	Phenolic acids	Phenolic acids	10537-86-7	B	4499	3600.4	3821.3	4386	3618.5	4101.2	0.139418	1.01552	0.0222175	insig
Lmln010063	C14H22O	2,6-Di-tert-butylphenol	Phenolic acids	Phenolic acids	128-39-2	A	368480	316720	253450	296550	366270	347410	0.443027	1.07626	0.106025	insig
Zmgn002106	C11H13NO3	N-Acetyl-L-phenylalanine	Amino acids and derivatives	Amino acids and derivatives	2018-61-3	A	46604	81643	85104	381660	169680	56708	0.859103	2.84999	1.51096	insig
mws1014	C10H8O5	Fraxetin (7,8-Dihydroxy-6-methoxycoumarin)	Lignans and Coumarins	Coumarins	574-84-5	B	72732	212640	294390	578930	552520	178870	0.897868	2.2601	1.17639	insig
mws1212	C11H12O4	Methyl ferulate	Phenolic acids	Phenolic acids	2309-07-1	A	4570800	1970500	1615200	2233800	2744100	1825100	0.181073	0.834059	-0.261779	insig
mws2184	C11H12O4	Ethyl caffeate	Phenolic acids	Phenolic acids	102-37-4	B	12893	6634.6	4441.9	6354.3	15539	4077.3	0.045915	1.08349	0.11568	insig
pmb2620	C11H12O4	3,4-Dimethoxycinnamic acid	Phenolic acids	Phenolic acids	14737-89-4	A	2135200	1075700	842300	860400	1378800	952120	0.40352	0.787358	-0.344908	insig
pme3443	C11H12O4	Sinapinaldehyde	Phenolic acids	Phenolic acids	4206-58-0	B	8172.7	8718.9	11385	14842	14220	10249	1.09836	1.39023	0.475324	insig
Zmyn000108	C6H10O8	D-Saccharic acid*	Others	Saccharides and Alcohols	87-73-0	A	577200	693900	649950	790330	721740	619290	0.743251	1.10948	0.149879	insig
Zmpn000199	C6H10O8	D-Galactaric acid*	Others	Saccharides and Alcohols	526-99-8	A	1029300	1223300	960480	848290	844950	649450	1.20057	0.72911	-0.455791	insig
Hmcn000192	C7H14O7	Sedoheptulose	Others	Saccharides and Alcohols	3019-74-7	A	410170	488370	464640	533010	552570	341790	0.14356	1.04709	0.0663833	insig
mws0853	C11H14O4	Sinapyl alcohol	Phenolic acids	Phenolic acids	537-33-7	B	2687.3	3038.5	11552	3448	14273	10759	0.622681	1.64836	0.72103	insig
Zmgn003633	C12H20O3	12-Oxo-10E-Dodecenoic Acid	Lipids	Free fatty acids	65410-38-0	B	2114.5	2433.3	1639.6	896.45	2209.9	2165.5	0.507403	0.85203	-0.231024	insig
mws0863	C5H11O7P	2-Deoxyribose-5'-phosphate	Nucleotides and derivatives	Nucleotides and derivatives	102916-66-5	B	21046	52574	22601	14259	21090	9439.9	1.03001	0.465479	-1.10321	down
pmb2507	C5H11O7P	2-Deoxyribose-1-phosphate	Nucleotides and derivatives	Nucleotides and derivatives	17210-42-3	B	62591	810450	236040	89463	125570	78487	0.749365	0.264652	-1.91783	insig
pmb2873	C13H13NO2	3-(2-Naphthyl)-L-alanine	Amino acids and derivatives	Amino acids and derivatives	58438-03-2	B	9	28589	12871	10351	10313	19910	0.564554	0.978418	-0.0314777	insig
pme0170	C8H16N4O3	N-Acetyl-L-Arginine	Amino acids and derivatives	Amino acids and derivatives	155-84-0	A	23958	13517	18886	41366	35259	31782	1.31318	1.92344	0.943689	insig
mws5045	C12H24O3	12-Hydroxydodecanoic acid	Lipids	Free fatty acids	505-95-3	A	2488.7	1311.2	1777.5	5147.3	6544.7	6778	1.40741	3.31158	1.72752	up
mws0677	C12H14N2O2	N-Acetyl-5-hydroxytryptamine	Alkaloids	Alkaloids	1210-83-9	B	248020	204080	165850	56401	149820	117200	1.11039	0.523377	-0.934077	insig
Lmrj001698	C9H18N2O4	L-Seryl-L-Isoleucine	Amino acids and derivatives	Amino acids and derivatives	91086-51-0	A	124540	503900	1340800	285910	90017	140370	0.830887	0.262181	-1.93137	insig
mws1337	C9H17NO5	D-Pantothenic Acid	Others	Vitamin	79-83-4	A	1088000	1622300	1323100	893310	2064200	1130900	0.0932857	1.01364	0.0195434	insig
pme1228	C11H12N2O3	5-Hydroxy-L-tryptophan	Amino acids and derivatives	Amino acids and derivatives	56-69-9	A	10651	11053	8836.6	20680	10555	12420	0.877746	1.42941	0.515418	insig
Hmyp002656	C11H11NO4	Methyl dioxindole-3-acetate	Others	Others	57061-18-4	A	9573.9	4675.9	6557.3	21841	16561	9387.4	1.17812	2.29678	1.19961	up
mws4174	C8H15NO6	N-Acetyl-D-mannosamine	Others	Saccharides and Alcohols	7772-94-3	B	32381	63148	49318	33996	31537	14823	1.00022	0.554765	-0.850052	insig
mws2608	C8H15NO6	N-Acetyl-D-galactosamine	Others	Saccharides and Alcohols	1811-31-0	B	26771	32087	32270	18292	20631	14248	1.33525	0.583476	-0.777255	insig
pme2755	C8H15NO6	N-Acetyl-D-glucosamine	Others	Saccharides and Alcohols	7512-17-6	B	149700	185260	138850	142380	129800	152730	0.723536	0.896794	-0.157151	insig
mws5042	C11H14N2O3	L-Glycyl-L-phenylalanine	Amino acids and derivatives	Amino acids and derivatives	721-66-4	B	114730	194500	385660	172750	120960	124280	0.691739	0.60152	-0.733316	insig
Hmgp005956	C13H18O3	Dehydrovomifoliol	Terpenoids	Monoterpenoids	15764-81-5	B	104540	95069	91207	86824	74431	64167	1.18164	0.775136	-0.367478	insig
mws0520	C11H13NO4	N-Acetyl-L-tyrosine	Amino acids and derivatives	Amino acids and derivatives	537-55-3	A	27443	33630	37967	68888	56948	65751	1.40403	1.93444	0.951916	insig
pmb2643	C14H26O2	Myristoleic acid	Lipids	Free fatty acids	544-64-9	A	1258.2	2287.6	1875.9	1113.5	5536.6	1080	0.109654	1.42577	0.511742	insig
pme1194	C9H13N3O4	2'-Deoxycytidine	Nucleotides and derivatives	Nucleotides and derivatives	951-77-9	B	25048	75122	34935	29048	17174	15161	1.02527	0.454336	-1.13817	down
mws0119	C14H28O2	Myristic Acid	Lipids	Free fatty acids	544-63-8	A	8520200	10835000	8743700	9636900	10791000	8759900	0.300527	1.03875	0.0548518	insig
Lmhp001461	C11H20N2O3	L-Prolyl-L-Leucine	Amino acids and derivatives	Amino acids and derivatives	52899-07-7	B	57975	95523	65012	35112	53546	51039	1.10525	0.639316	-0.645398	insig
mws0474	C12H22O4	Dodecanedioic aicd	Organic acids	Organic acids	693-23-2	A	705.07	1276.8	1206.1	925.78	384.88	618.6	0.961166	0.605169	-0.72459	insig
Lmhp001670	C11H22N2O3	L-Valyl-L-Leucine	Amino acids and derivatives	Amino acids and derivatives	3989-97-7	B	244170	1005300	1683300	382350	150760	215680	0.998447	0.255318	-1.96963	insig
pmb0962	C10H22N2O4	L-Lysine-Butanoic Acid	Amino acids and derivatives	Amino acids and derivatives	80407-71-2	B	10655000	11597000	10881000	17454000	12289000	9863300	0.619506	1.19537	0.257461	insig
mws4176	C12H16N2O3	L-Alanyl-L-Phenylalanine	Amino acids and derivatives	Amino acids and derivatives	3061-90-3	B	30228	102840	158440	28055	15813	23433	1.14791	0.230872	-2.11484	down
Lmhn003240	C11H10O6	Benzoylmalic acid	Phenolic acids	Phenolic acids	22138-51-8	A	6374300	15692000	7624100	78649	95234	107410	1.47214	0.00947421	-6.72178	down
pmn001669	C12H14O5	Methyl sinapate	Phenolic acids	Phenolic acids	20733-94-2	A	9778	5232.2	3164.9	5929.7	3544.5	1362.9	0.68586	0.596261	-0.745985	insig
pme2827	C16H32O	Palmitaldehyde	Lipids	Free fatty acids	629-80-1	B	4863400	4677000	4682800	4744100	4912300	4898300	0.831083	1.02331	0.033239	insig
pme0264	C10H14N2O5	Thymidine	Nucleotides and derivatives	Nucleotides and derivatives	50-89-5	B	110330	152690	118410	103620	91353	69251	1.13396	0.69272	-0.529657	insig
mws0359	C15H30O2	Pentadecanoic Acid	Lipids	Free fatty acids	1002-84-2	A	108700	148750	133240	117260	130080	91227	0.670545	0.866587	-0.206583	insig
pme3732	C9H13N3O5	Cytidine	Nucleotides and derivatives	Nucleotides and derivatives	65-46-3	B	248040	800640	758300	311880	269830	196770	0.991309	0.430818	-1.21485	insig
ML10180524	C9H13N3O5	Cytarabine	Nucleotides and derivatives	Nucleotides and derivatives	147-94-4	B	235430	906380	755690	291920	206760	140880	1.06392	0.337054	-1.56895	down
mws0248	C9H12N2O6	Uridine	Nucleotides and derivatives	Nucleotides and derivatives	58-96-8	A	224070	1557400	998350	197560	187970	156790	1.12257	0.195092	-2.35778	down
pme2266	C10H16N2O3S	Biotin	Others	Vitamin	58-85-5	B	106010	220320	142620	195930	277940	199760	0.933441	1.43646	0.522522	insig
Lmhp002031	C12H24N2O3	L-Leucyl-L-Leucine	Amino acids and derivatives	Amino acids and derivatives	3303-31-9	B	129580	501820	795810	199770	115690	143300	0.928056	0.321438	-1.63739	insig
pmb2591	C13H14N2O3	N-Acetyl-L-Tryptophan	Amino acids and derivatives	Amino acids and derivatives	1218-34-4	A	9235400	28927000	27591000	28279000	23754000	7841600	0.132394	0.910593	-0.135121	insig
mws0124	C13H14N2O3	N-(3-Indolylacetyl)-L-alanine	Amino acids and derivatives	Amino acids and derivatives	57105-39-2	B	8196.1	7636	10980	9120	14194	13770	0.986114	1.38311	0.467913	insig
pme2563	C8H14N2O5S	γ-Glu-Cys	Amino acids and derivatives	Amino acids and derivatives	636-58-8	B	42883	25791	8425.8	20794	11853	4250.1	0.704134	0.478563	-1.06322	insig
pme3961	C10H13N5O3	2'-Deoxyadenosine	Nucleotides and derivatives	Nucleotides and derivatives	958-09-8	A	139800	456530	415830	157470	113670	82190	1.10859	0.349085	-1.51835	down
Lmhn002629	C11H10O7	Benzoyltartaric acid	Phenolic acids	Phenolic acids	-	B	9	9	9	1162200	921700	765490	1.48051	105533	16.6873	up
Lmhn003373	C11H10O7	p-Hydroxybenzoylmalic acid	Phenolic acids	Phenolic acids	-	B	502780	1311600	462440	12034	10695	14128	1.46464	0.0161879	-5.94894	down
Hmbp003234	C12H14O6	1-O-Caffeoylglycerol	Lipids	Glycerol ester	-	B	44518	26299	52185	131790	64276	53973	1.05405	2.0328	1.02347	up
mws0361	C16H30O2	Palmitoleic Acid	Lipids	Free fatty acids	373-49-9	A	1765.2	4573.8	2930.1	4255.8	3472.3	2229.2	0.24251	1.07425	0.103325	insig
pma3101	C11H14NO6+	Nicotinate D-ribonucleoside	Others	Vitamin	17720-18-2	B	519270	1818100	1995400	635630	465030	314860	1.06406	0.326701	-1.61396	down
mws1488	C16H32O2	Palmitic acid	Lipids	Free fatty acids	57-10-3	A	12762	17995	16158	16896	14755	15853	0.128355	1.01255	0.0179997	insig
mws0120	C8H20NO6P	Choline Alfoscerate	Lipids	PC	28319-77-9	B	418570	449420	281720	34629	46841	20055	1.43848	0.0883049	-3.50136	down
pme1187	C10H14N2O6	5-Methyluridine	Nucleotides and derivatives	Nucleotides and derivatives	1463-10-1	B	2303.4	3240.9	2339.3	4887	3574.8	9	0.503093	1.07448	0.103644	insig
Zmyn000110	C6H14NO8P	D-Glucosamine 1-phosphate	Others	Saccharides and Alcohols	2152-75-2	B	80312	67747	101390	22674	52516	17403	1.22511	0.37119	-1.42977	down
mws1090	C6H13O9P	Glucose-1-phosphate*	Others	Saccharides and Alcohols	59-56-3	A	3462000	3208600	2660200	2166400	2094800	1807300	1.34955	0.650373	-0.620661	insig
mws0866	C6H13O9P	D-Glucose 6-phosphate*	Others	Saccharides and Alcohols	56-73-5	A	4266400	3963100	3273000	2396600	2778900	1845100	1.27712	0.610354	-0.712281	insig
pme3313	C6H13O9P	D-Fructose 6-phosphate*	Others	Saccharides and Alcohols	643-13-0	A	532590	403650	380120	330910	412450	346660	0.871537	0.828056	-0.272199	insig
Cmpp007319	C15H16O4	7-Methoxy-5-Prenyloxycoumarin	Lignans and Coumarins	Coumarins	35590-41-1	A	3709	1712.5	1805.2	2519.9	2511.5	2652.5	0.366784	1.06327	0.0885017	insig
Zmpn000095	C6H15O9P	Sorbitol-6-phosphate	Others	Saccharides and Alcohols	20479-58-7	B	29648	41374	52793	40062	75636	28531	0.242462	1.16488	0.220175	insig
Lmhp001732	C14H18N2O3	L-Prolyl-L-Phenylalanine	Amino acids and derivatives	Amino acids and derivatives	13589-02-1	B	41935	64193	41914	40242	45522	29164	0.796738	0.77632	-0.365276	insig
mws0715	C13H16N2O4	Phenylacetyl-L-glutamine	Amino acids and derivatives	Amino acids and derivatives	28047-15-6	B	18871	31119	15505	35588	15404	12171	0.20121	0.964394	-0.0523051	insig
Lmlp003161	C14H20N2O3	N-Feruloylputrescine	Alkaloids	Phenolamine	501-13-3	B	18081	11904	14262	24220	16554	12102	0.481292	1.19502	0.257033	insig
Lmhp002001	C14H20N2O3	L-Valyl-L-Phenylalanine	Amino acids and derivatives	Amino acids and derivatives	3918-92-1	B	97327	273850	372230	81431	55016	62377	1.20609	0.26745	-1.90266	down
pme1184	C10H13N5O4	2'-Deoxyguanosine	Nucleotides and derivatives	Nucleotides and derivatives	961-07-9	B	214210	372870	276630	241110	154990	146790	1.06856	0.628556	-0.669887	insig
pme0230	C10H13N5O4	Adenosine	Nucleotides and derivatives	Nucleotides and derivatives	58-61-7	A	914010	3795200	2852600	623680	442250	416480	1.26647	0.196039	-2.35079	down
pme2890	C8H16N2O4S2	L-Homocystine	Amino acids and derivatives	Amino acids and derivatives	626-72-2	B	6025.6	15571	20820	11725	4306	5131.1	0.840763	0.498911	-1.00315	insig
mws1060	C10H12N4O5	9-(Arabinosyl)hypoxanthine	Nucleotides and derivatives	Nucleotides and derivatives	7013-16-3	A	110620	85872	96207	96379	80953	94065	0.550444	0.927222	-0.109013	insig
pmp000087	C13H16O6	2-Feruloyl-sn-glycerol	Phenolic acids	Phenolic acids	-	A	4680500	3680900	2755900	5660300	6286400	5847100	1.24485	1.60055	0.678568	insig
pmp000086	C13H16O6	1-Feruloyl-sn-glycerol	Phenolic acids	Phenolic acids	-	B	2786000	2675100	3069900	4681300	4831900	5381100	1.44848	1.7459	0.803974	insig
mws0383	C17H32O2	10-Heptadecenoic Acid	Lipids	Free fatty acids	29743-97-3	A	217210	316430	430760	388770	386480	137730	0.189386	0.946682	-0.0790484	insig
mws1175	C16H14O4	Pinostrobin	Flavonoids	Dihydroflavone	480-37-5	B	1722.1	1973.7	1490.3	2647.9	3280.8	3239.8	1.37832	1.7679	0.822036	insig
mws1297	C13H18O6	Benzyl glucoside	Phenolic acids	Phenolic acids	4304-12-5	A	51727	87697	49999	52692	86708	90168	0.52257	1.21193	0.27731	insig
pme0376	C15H12O5	Naringenin (5,7,4'-Trihydroxyflavanone)	Flavonoids	Dihydroflavone	480-41-1	A	71031	78951	64544	49155	26538	26545	1.30018	0.476576	-1.06922	down
pme3472	C12H16O7	Arbutin	Phenolic acids	Phenolic acids	497-76-7	B	106980	221360	95393	33686	31739	15330	1.35225	0.19058	-2.39153	down
Lmmn003323	C16H32O3	2-Hydroxyhexadecanoic acid	Organic acids	Organic acids	764-67-0	B	159900	414110	316050	140580	154330	141260	1.11138	0.490046	-1.02901	down
pmp001264	C16H35NO2	Hexadecylsphingosine	Lipids	Sphingolipids	-	A	2654100	1919400	1934000	1934500	2267000	2369600	0.102851	1.00977	0.0140315	insig
pmb1574	C18H28O2	9,12-Octadecadien-6-Ynoic Acid	Lipids	Free fatty acids	61481-29-6	B	25414	38700	24106	13139	29629	21193	0.795976	0.725017	-0.463913	insig
mws1038	C11H22N2O4S	Pantetheine	Others	Others	496-65-1	B	4496.8	6739.2	5448.5	11822	9205	5680.7	0.999753	1.60075	0.678747	insig
Lmlp012720	C16H22O4	Dibutyl phthalate*	Phenolic acids	Phenolic acids	84-74-2	A	21444000	17095000	16754000	16079000	19604000	14857000	0.525324	0.91404	-0.129671	insig
Lmxp011770	C16H22O4	Diisobutyl phthalate*	Phenolic acids	Phenolic acids	84-69-5	A	21530000	16911000	16366000	15649000	19701000	15077000	0.46519	0.920083	-0.120164	insig
mws5035	C15H22N2O3	L-Leucyl-L-phenylalanine	Amino acids and derivatives	Amino acids and derivatives	56217-82-4	B	131480	421980	442210	31146	33892	40563	1.38523	0.10606	-3.23704	down
Lmbn005923	C18H30O2	Crepenynic acid	Lipids	Free fatty acids	2277-31-8	A	231310	351460	402230	266000	205760	230860	0.970698	0.71332	-0.487379	insig
pmb0889	C18H30O2	Punicic acid (9Z,11E,13Z-octadecatrienoic acid)	Lipids	Free fatty acids	544-72-9	B	229410	268450	276190	164510	206730	189920	1.29678	0.724966	-0.464015	insig
mws0367	C18H30O2	α-Linolenic Acid*	Lipids	Free fatty acids	463-40-1	A	13449000	21183000	25330000	16790000	13447000	15140000	0.783952	0.756763	-0.402087	insig
mws0366	C18H30O2	γ-Linolenic Acid*	Lipids	Free fatty acids	506-26-3	A	14514000	22982000	26985000	17913000	14204000	15197000	0.854729	0.733767	-0.446607	insig
Lmhn002926	C13H12O7	p-Coumaroylmalic acid	Phenolic acids	Phenolic acids	-	A	7940000	6587300	6025500	3440100	4611300	4820800	1.2945	0.626299	-0.675076	insig
mws0629	C13H16N2O5	L-Aspartyl-L-Phenylalanine	Amino acids and derivatives	Amino acids and derivatives	13433-09-5	A	37389	49296	33941	25368	31125	25524	1.22478	0.679928	-0.556546	insig
mws1491	C18H32O2	Linoleic acid	Lipids	Free fatty acids	60-33-3	A	33251000	49024000	49620000	37118000	30682000	30904000	1.02098	0.748353	-0.418209	insig
Lmbn006152	C18H32O2	(9Z,11E)-Octadecadienoic acid	Lipids	Free fatty acids	2540-56-9	B	22335	29359	33619	25031	17215	15900	1.06589	0.681561	-0.553086	insig
Hmhp001812	C11H15N5O4	2'-O-Methyladenosine	Nucleotides and derivatives	Nucleotides and derivatives	2140-79-6	A	42749	80923	137220	78967	36116	34768	0.75676	0.574379	-0.799924	insig
YC512118	C18H35NO	Oleamide (9-Octadecenamide)	Lipids	Free fatty acids	301-02-0	A	15418	29743	18906	23827	18939	72796	0.611775	1.80377	0.851014	insig
mws2623	C18H34O2	11-Octadecanoic acid(Vaccenic acid)	Lipids	Free fatty acids	506-17-2	A	1458800	2267600	2501200	2041500	1923200	1781400	0.23273	0.922683	-0.116093	insig
pme1178	C10H13N5O5	Guanosine	Nucleotides and derivatives	Nucleotides and derivatives	118-00-3	A	5584300	17904000	14280000	9281600	4215600	3102800	0.955431	0.439522	-1.18599	insig
pmp001252	C17H17NO3	p-Coumaroyltyramine	Alkaloids	Phenolamine	36417-86-4	B	9	3192.6	4625.6	9	9	9	1.04681	0.00344951	-8.17939	down
mws0051	C16H12O5	Acacetin	Flavonoids	Flavonoid	480-44-4	B	821060	117970	912160	221940	209890	126490	0.784326	0.301601	-1.72929	insig
mws0129	C16H12O5	Genkwanin (Apigenin 7-methyl ether)	Flavonoids	Flavonoid	437-64-9	B	784960	110850	902080	216200	201860	120530	0.772462	0.299568	-1.73905	insig
mws0668	C10H12N4O6	Xanthosine	Nucleotides and derivatives	Nucleotides and derivatives	146-80-5	A	544850	419960	533680	846390	524330	338150	0.208065	1.14039	0.189533	insig
Zmyn005026	C18H36O2	16-Methylheptadecanoic acid	Lipids	Free fatty acids	2724-58-5	B	8101100	7005500	7243900	6436600	9920300	8319300	0.461054	1.10406	0.142813	insig
mws1489	C18H36O2	Stearic Acid	Lipids	Free fatty acids	57-11-4	A	18297000	17031000	16731000	15101000	19840000	19267000	0.268196	1.04128	0.0583582	insig
mws1068	C15H10O6	Kaempferol (3,5,7,4'-Tetrahydroxyflavone)	Flavonoids	Flavonols	520-18-3	A	746400	726760	862770	73036	39193	31147	1.45307	0.0613786	-4.02612	down
mws1521	C13H18O7	Salicin	Phenolic acids	Phenolic acids	138-52-3	A	150810	160130	135620	237030	150450	136810	0.524749	1.17406	0.231511	insig
mws1094	C15H12O6	Aromadendrin (Dihydrokaempferol)	Flavonoids	Dihydroflavonol	480-20-6	B	23530	27563	20730	7415.9	7019.8	8358.8	1.46624	0.31737	-1.65576	down
pmn001686	C16H32O4	10,16-Dihydroxypalmitic acid	Lipids	Free fatty acids	3233-90-7	A	56877	33460	64960	50209	66972	49721	0.357093	1.07473	0.103971	insig
pme3163	C7H15O10P	D-Sedoheptuiose 7-phosphate	Others	Saccharides and Alcohols	2646-35-7	B	1391300	877810	1468400	1088900	493210	404400	1.0427	0.531506	-0.911841	insig
pmb2657	C10H18N4O6	Argininosuccinic acid	Organic acids	Organic acids	2387-71-5	B	183980	209590	138960	121420	100310	70763	1.2373	0.549252	-0.864461	insig
Zmyn004548	C18H28O3	12-Oxo-phytodienoic acid	Lipids	Free fatty acids	85551-10-6	B	3693.5	8749.9	11500	2597.5	3199.5	6971.4	0.844844	0.533274	-0.90705	insig
pmb2792	C18H30O3	13-Hydroxy-6,9,11-octadecatrienoic acid	Lipids	Free fatty acids	74784-20-6	B	25166	28560	22079	27331	25079	15923	0.463599	0.901431	-0.149711	insig
pmb2787	C18H30O3	9-Oxo-10E,12Z-octadecadienoic acid	Lipids	Free fatty acids	54232-59-6	A	22547	26675	34266	27538	19164	26342	0.545248	0.874904	-0.192803	insig
pmb2786	C18H30O3	9-Hydroxy-10,12,15-octadecatrienoic acid*	Lipids	Free fatty acids	89886-42-0	B	9605.4	18656	22042	11239	9486.7	13988	0.756073	0.690087	-0.535151	insig
Lmbn005443	C18H30O3	13-KODE; (9Z,11E)-13-Oxooctadeca-9,11-dienoic acid*	Lipids	Free fatty acids	54739-30-9	B	10353	19078	19285	10412	10184	11362	1.00815	0.656006	-0.608219	insig
Zmpn003368	C18H30O3	13S-Hydroxy-9Z,11E,15Z-octadecatrienoic acid	Lipids	Free fatty acids	87984-82-5	B	78333	99422	321360	167820	164990	121400	0.187413	0.910031	-0.136013	insig
Lmqp000329	C8H14N3O7P	5-Aminoimidazole ribonucleotide	Nucleotides and derivatives	Nucleotides and derivatives	25635-88-5	A	1009000	1055600	614780	75346	81911	36591	1.43935	0.0723481	-3.7889	down
Lmhn102068	C13H12O8	2-O-Caffeoylmalic acid	Phenolic acids	Phenolic acids	53755-04-7	B	9335.5	5116.8	1141.2	1596.6	4301.7	6593.8	0.0836357	0.801109	-0.319929	insig
pmb2799	C18H32O3	12,13-Epoxy-9-Octadecenoic Acid	Lipids	Free fatty acids	6799-85-5	B	27863	31730	33047	33311	30666	31216	0.368678	1.02756	0.0392202	insig
Lmbn005369	C18H32O3	13(S)-HODE;13(S)-Hydroxyoctadeca-9Z,11E-dienoic acid*	Lipids	Free fatty acids	10219-69-9	A	238380	282640	304520	187670	259660	196170	1.04294	0.77949	-0.359398	insig
Lmbn005662	C18H32O3	9(10)-EpOME;(9R,10S)-(12Z)-9,10-Epoxyoctadecenoic acid	Lipids	Free fatty acids	16833-56-0	A	84918	106030	116750	74717	78009	82792	1.17846	0.765419	-0.385678	insig
Rfmb091	C18H32O3	9S-Hydroxy-10E,12Z-octadecadienoic acid*	Lipids	Free fatty acids	15514-85-9	A	235720	288980	303400	185690	257780	193970	1.05299	0.769762	-0.377515	insig
pme1474	C11H15N5O3S	5'-Deoxy-5'-(methylthio)adenosine	Nucleotides and derivatives	Nucleotides and derivatives	2457-80-9	A	6724400	5146900	4650000	4876000	3979300	5855700	0.537608	0.890426	-0.167432	insig
pmb0197	C11H15N5O5	N7-Methylguanosine	Nucleotides and derivatives	Nucleotides and derivatives	20244-86-4	B	95253	74427	64559	43414	39434	31404	1.36245	0.487758	-1.03576	down
Zmyn004714	C18H34O3	Ricinoleic acid	Lipids	Free fatty acids	141-22-0	A	145480	186170	192360	186810	141580	129770	0.64604	0.874334	-0.193743	insig
Zmgn005057	C18H34O3	9,10-Epoxyoctadecanoic Acid	Lipids	Free fatty acids	2443-39-2	A	230300	211640	304070	193120	221300	342790	0.0225026	1.01501	0.0214985	insig
pmf0297	C20H42O	1-Eicosanol	Lipids	Free fatty acids	629-96-9	B	155370	183580	192310	195010	138630	133760	0.662869	0.879795	-0.18476	insig
Lmhn001386	C12H12O9	Vnilloyltartaric acid	Phenolic acids	Phenolic acids	-	B	11034	16820	17118	22464	8289.7	10485	0.351279	0.916986	-0.125028	insig
pmp000001	C16H12O6	Hispidulin (5,7,4'-Trihydroxy-6-methoxyflavone)	Flavonoids	Flavonoid	1447-88-7	B	7888	7118.1	5742	9205.5	4856.2	21168	0.531967	1.69797	0.763813	insig
Zmhn001926	C13H16O8	1-O-Salicyl-D-glucose	Phenolic acids	Phenolic acids	60517-74-0	A	7395400	11698000	6249200	26156000	11241000	7502100	0.732051	1.77168	0.825122	insig
pmb3142	C13H16O8	Salicylic acid-2-O-glucoside	Phenolic acids	Phenolic acids	10366-91-3	A	5178700	10077000	5182600	5588300	6820000	3527100	0.541754	0.779683	-0.35904	insig
pme2816	C20H28O2	4-Oxoretinol	Others	Vitamin	62702-55-0	B	2943.8	2658.9	2861.8	1841.5	3001.1	4226.4	0.0270186	1.07142	0.0995186	insig
Lmqn008288	C18H36O3	3-Hydroxyoctadecanoic Acid	Lipids	Free fatty acids	45261-96-9	B	456410	473960	443380	507380	424260	417330	0.243313	0.981962	-0.0262612	insig
pme2954	C15H10O7	Quercetin	Flavonoids	Flavonols	117-39-5	A	87570	36640	56787	106670	97215	55952	0.786692	1.43559	0.521641	insig
Cmsp004086	C16H14O6	Dihydrokaempferide	Flavonoids	Flavonols	137225-59-3	B	32542	28892	24411	526750	314980	167910	1.42753	11.7612	3.55596	up
Zmhn000892	C13H18O8	4-O-Glucosyl-3,4-dihydroxybenzyl alcohol	Phenolic acids	Phenolic acids	-	A	157160	78599	95076	145160	196580	184480	1.10342	1.59058	0.669554	insig
mws1375	C12H21N3O6	Nicotianamine	Amino acids and derivatives	Amino acids and derivatives	34441-14-0	B	173200	87066	207780	229230	108150	55915	0.368334	0.840291	-0.251038	insig
mws0044	C15H12O7	Dihydroquercetin(Taxifolin)	Flavonoids	Dihydroflavonol	480-18-2	B	9	9	9	30992	27193	11147	1.4777	2567.85	11.3263	up
pme1086	C10H17N3O6S	Glutathione reduced form	Amino acids and derivatives	Amino acids and derivatives	70-18-8	A	136880	139240	251930	182000	94531	114640	0.681551	0.740784	-0.432875	insig
pmn001610	C20H36O2	Eicosadienoic acid	Lipids	Free fatty acids	5598-38-9	A	34574	87059	63928	45140	21762	26722	1.02997	0.504546	-0.986943	insig
Lmhn003074	C14H14O8	Feruloylmalic acid	Phenolic acids	Phenolic acids	-	A	12824000	8256300	7638400	6500500	5725100	8276000	0.958791	0.713876	-0.486254	insig
pmb2791	C18H30O4	9-Hydroperoxy-10E,12,15Z-octadecatrienoic acid	Lipids	Free fatty acids	111004-08-1	A	366440	433580	74059	119190	93157	60192	0.936405	0.311801	-1.6813	insig
pmn001606	C20H38O2	Eicosenoic acid	Lipids	Free fatty acids	26764-41-0	A	777760	288680	707870	766930	923610	1426300	0.960827	1.75665	0.812826	insig
pme3967	C12H17N5O5	2-(Dimethylamino)guanosine	Nucleotides and derivatives	Nucleotides and derivatives	2140-67-2	B	77343	105770	99880	120910	100110	71968	0.104245	1.03532	0.0500752	insig
Lmhn001477	C13H12O9	2-Caffeoyl-L-tartaric acid (Caftaric acid)	Phenolic acids	Phenolic acids	67879-58-7	A	9	9	9	79789	58994	72481	1.47983	7824.59	12.9338	up
mws0636	C18H20N2O3	L-Phenylalanyl-L-phenylalanine	Amino acids and derivatives	Amino acids and derivatives	2577-40-4	A	21526	57554	44436	9233	9448	8990	1.37	0.224028	-2.15825	down
Zmjn004133	C18H32O4	9S-Hydroperoxy-10E,12Z-octadecadienoic acid	Lipids	Free fatty acids	5502-91-0	A	45300	53591	38462	56489	51201	61906	1.01001	1.23475	0.304214	insig
Lmbn004685	C18H32O4	5S,8R-DiHODE; (5S,8R,9Z,12Z)-5,8-Dihydroxyoctadeca-9,12-dienoate	Lipids	Free fatty acids	-	A	27147	80233	9814.6	8562.6	6687.7	5801.9	1.12248	0.179635	-2.47686	down
Lmbn005287	C18H32O4	7S,8S-DiHODE; (9Z,12Z)-(7S,8S)-Dihydroxyoctadeca-9,12-dienoic acid	Lipids	Free fatty acids	143288-65-7	A	91081	168270	179260	99620	146160	84855	0.64088	0.753823	-0.407703	insig
pmn001689	C18H32O4	9-Hydroxy-12-oxo-15(Z)-octadecenoic acid	Lipids	Free fatty acids	-	B	34822	46590	71314	47043	38499	48006	0.307895	0.874429	-0.193587	insig
pmb2804	C18H32O4	13S-Hydroperoxy-9Z,11E-octadecadienoic acid	Lipids	Free fatty acids	33964-75-9	B	193030	170780	195090	190220	202630	232720	0.889259	1.11929	0.162581	insig
pmf0397	C20H40O2	Arachidic acid	Lipids	Free fatty acids	506-30-9	B	2123500	1671900	1770400	1691500	1483700	2784100	0.101374	1.0707	0.0985538	insig
mws1433	C18H19NO4	N-Feruloyltyramine	Alkaloids	Phenolamine	66648-43-9	A	528070	720820	428860	512310	853690	197940	0.316253	0.932165	-0.101343	insig
mws1174	C17H14O6	3-O-Acetylpinobanksin	Flavonoids	Dihydroflavonol	52117-69-8	A	4070.1	9	9	9	3302.6	4552.8	0.484517	1.92373	0.943906	insig
Lmmn002179	C14H18O8	Methyl salicylate-2-O-glucoside	Phenolic acids	Phenolic acids	10019-60-0	B	54321	50956	38210	88260	94726	99523	1.39789	1.96888	0.977377	insig
Lmbn005487	C18H34O4	12,13-DHOME; (9Z)-12,13-Dihydroxyoctadec-9-enoic acid	Lipids	Free fatty acids	263399-35-5	B	22220	25305	23509	23206	26529	17670	0.347809	0.948912	-0.0756541	insig
mws0066	C16H12O7	Isorhamnetin	Flavonoids	Flavonols	480-19-3	A	36418	43270	50130	39857	102190	73252	0.903353	1.65847	0.729851	insig
Lmmn004912	C16H12O7	3-O-Methylquercetin	Flavonoids	Flavonols	1486-70-0	B	4791.4	2664.4	5218.7	5594.1	1672	3274.5	0.443956	0.831638	-0.265972	insig
pmb2871	C13H16O9	1-O-Gentisoyl-D-glucoside*	Phenolic acids	Phenolic acids	23445-11-6	A	304990	321020	218610	378620	345240	322000	0.960704	1.23826	0.308315	insig
pmn001367	C13H16O9	Protocatechuic acid-4-O-glucoside*	Phenolic acids	Phenolic acids	-	A	196140	231500	157690	285260	234970	180540	0.667529	1.19722	0.259691	insig
Lmfp001509	C13H16O9	1-O-Galloyl-rhamnose	Tannins	Tannin	-	B	19619	18247	20287	22062	20897	24081	1.1896	1.15282	0.205169	insig
Hmtn001120	C14H20O8	5-(2-Hydroxyethyl)-2-O-glucosylphenol	Phenolic acids	Phenolic acids	-	A	101270	32517	59252	41626	175240	172100	0.703997	2.01496	1.01075	insig
pmb2221	C18H39NO3	4-Hydroxysphinganine	Lipids	Sphingolipids	554-62-1	A	95681	164130	105590	90491	126990	80313	0.611666	0.814979	-0.295166	insig
pmb0751	C16H16O7	Trans-5-O-(p-Coumaroyl)shikimate	Phenolic acids	Phenolic acids	-	B	99568	159330	145600	89675	130920	168290	0.183084	0.961402	-0.056789	insig
mws0582	C11H19N3O6S	S-(Methyl)glutathione	Amino acids and derivatives	Amino acids and derivatives	2922-56-7	A	54957	40021	67387	59198	72770	48552	0.464315	1.11182	0.152918	insig
pmn001513	C14H10O9	Digallic Acid	Tannins	Tannin	536-08-3	B	4020.1	5958.2	15333	3664.8	4500.5	5478	0.71849	0.53902	-0.891589	insig
pme3174	C9H14N3O8P	Cytidine 5'-monophosphate(Cytidylic acid)	Nucleotides and derivatives	Nucleotides and derivatives	63-37-6	B	25028	73434	189410	41497	44876	26066	0.686156	0.390587	-1.35628	insig
pme3188	C9H13N2O9P	Uridine 5'-monophosphate	Nucleotides and derivatives	Nucleotides and derivatives	58-97-9	B	125790	239210	647990	217070	57215	67246	0.93281	0.337151	-1.56853	insig
mws0983	C20H39NO2	N-Oleoylethanolamine	Alkaloids	Alkaloids	111-58-0	B	34456	81635	84716	38008	35943	42353	0.924333	0.579183	-0.787909	insig
Lmhn002140	C14H14O9	Feruloyltartaric acid (Fertaric acid)	Phenolic acids	Phenolic acids	-	B	9	9	9	4660700	2764100	2634400	1.48007	372563	18.5071	up
Zmhn002301	C15H18O8	p-Coumaric acid-4-O-glucoside	Phenolic acids	Phenolic acids	117405-48-8	A	32588000	22238000	29637000	27916000	19159000	21016000	0.810786	0.806164	-0.310855	insig
pmn001690	C16H24O7	3-Hydroxy-4-isopropylbenzylalcohol-3-O-glucoside	Phenolic acids	Phenolic acids	-	B	155370	244830	199310	107450	45501	43767	1.3021	0.328131	-1.60765	down
mws0884	C10H12N5O6P	Cyclic 3',5'-Adenylic acid	Nucleotides and derivatives	Nucleotides and derivatives	60-92-4	A	119310	435580	327000	80821	52834	49381	1.28449	0.20755	-2.26847	down
Lmmn003663	C14H18O9	5-Glucosyloxy-2-Hydroxybenzoic acid methyl ester	Phenolic acids	Phenolic acids	-	B	61872	77926	53027	4361.6	5940.2	8119.6	1.46308	0.0955343	-3.38784	down
Lmtn002565	C14H18O9	1-O-Vanilloyl-D-Glucose	Phenolic acids	Phenolic acids	-	B	533390	485270	589140	1103600	1168300	926630	1.44306	1.98938	0.992321	insig
Zmhn001883	C14H18O9	Vanillic acid-4-O-glucoside	Phenolic acids	Phenolic acids	32142-31-7	B	37299	29741	39965	3232.4	7400.1	3886.2	1.42644	0.135682	-2.88169	down
pmn001517	C15H22O8	3,4,5-Trimethoxyphenyl-1-O-Glucoside	Phenolic acids	Phenolic acids	-	B	2181400	4697800	1844800	8710700	9064200	6291100	1.27974	2.7586	1.46393	up
Hmqn003054	C18H34O5	9,10,11-Trihydroxy-12-octadecenoic acid	Lipids	Free fatty acids	61911-67-9	A	22688	19581	26866	22831	34361	35242	0.955115	1.33701	0.419007	insig
pmn001694	C18H34O5	9,10,13-Trihydroxy-11-Octadecenoic Acid	Lipids	Free fatty acids	29907-57-1	A	372360	389500	415010	353600	514090	533680	0.746509	1.19076	0.251883	insig
Lmbn004240	C18H34O5	9,10-Dihydroxy-12,13-epoxyoctadecanoic acid	Lipids	Free fatty acids	-	B	16026	17307	18698	20164	22014	19727	1.26163	1.18977	0.250685	insig
Lmbn003970	C18H34O5	9,12,13-TriHOME; 9(S),12(S),13(S)-Trihydroxy-10(E)-octadecenoic acid	Lipids	Free fatty acids	97134-11-7	A	27084	33932	30417	37023	49249	36418	1.15437	1.34186	0.424231	insig
pmp001284	C19H38O4	Monopalmitin	Lipids	Glycerol ester	542-44-9	A	7030.9	8721	9531.1	6588.7	5356.2	6152.2	1.23763	0.715781	-0.482409	insig
pme3184	C10H14N5O6P	2'-Deoxyadenosine-5'-monophosphate	Nucleotides and derivatives	Nucleotides and derivatives	653-63-4	A	352540	363430	343720	289080	231030	290120	1.30419	0.764592	-0.387239	insig
pmb0789	C14H21NO8	Pyridoxine-5'-O-glucoside	Others	Vitamin	-	B	486820	485050	522610	177660	175400	168530	1.4763	0.349011	-1.51866	down
Lmfn000604	C13H16O10	6-O-Galloyl-D-glucose	Tannins	Tannin	13186-19-1	A	145510	122140	142150	181460	241110	224390	1.35651	1.57872	0.658757	insig
pmn001518	C13H16O10	1-O-Galloyl-D-glucose	Tannins	Tannin	58511-73-2	A	463110	369740	317010	639340	359880	316090	0.297527	1.14389	0.193945	insig
Hmln000873	C13H16O10	2-O-Galloyl-D-glucose	Tannins	Tannin	-	B	572560	469470	426650	809290	520460	410000	0.455556	1.18457	0.24436	insig
mws0675	C11H15N2O8P	β-Nicotinamide mononucleotide	Nucleotides and derivatives	Nucleotides and derivatives	1094-61-7	B	250030	970870	473850	82102	122180	83320	1.32654	0.169702	-2.55893	down
pmb0776	C20H20N2O3	N-Feruloyltryptamine	Alkaloids	Phenolamine	53905-13-8	A	11837	12252	15735	7493.9	9571.3	20198	0.368484	0.935697	-0.0958866	insig
pmb0382	C19H14O6	O-Feruloyl 4-hydroxycoumarin	Lignans and Coumarins	Coumarins	-	B	1393800	669720	711470	648200	758250	617760	0.690443	0.729448	-0.455124	insig
pme3311	C6H14O12P2	D-Fructose-1,6-biphosphate	Others	Saccharides and Alcohols	488-69-7	B	16774	37652	24710	33958	47510	25859	0.728043	1.35623	0.439607	insig
Zmyn000083	C6H14O12P2	D-Glucose 1,6-bisphosphate	Others	Saccharides and Alcohols	10139-18-1	B	6484.4	21209	18731	22279	31856	24009	0.928052	1.68325	0.751252	insig
mws1015	C15H16O9	Esculin (6,7-DihydroxyCoumarin-6-glucoside)	Lignans and Coumarins	Coumarins	531-75-9	A	1256700	367410	855400	839310	827350	942320	0.348742	1.05222	0.0734308	insig
Zmhn001793	C15H18O9	6-O-Caffeoyl-D-glucose	Phenolic acids	Phenolic acids	-	B	15918000	11575000	16344000	11149000	8577600	8362700	1.22621	0.640767	-0.642128	insig
mws1080	C12H22O11	Galactinol	Others	Saccharides and Alcohols	3687-64-7	A	1429900	349540	459630	2051400	1687900	1419300	1.12482	2.3039	1.20408	up
Lmsn000381	C12H22O11	D-Maltose*	Others	Saccharides and Alcohols	133-99-3	A	1143500	175250	274260	1538900	1003100	845450	0.993978	2.12645	1.08844	insig
mws5038	C12H22O11	Isomaltulose*	Others	Saccharides and Alcohols	13718-94-0	A	1105300	159120	419330	1486000	1135300	1025800	1.01725	2.16606	1.11507	up
mws0264	C12H22O11	D-Trehalose*	Others	Saccharides and Alcohols	99-20-7	A	661080	116820	203270	799300	426500	453160	0.853971	1.71118	0.774993	insig
pme0519	C12H22O11	D-Sucrose*	Others	Saccharides and Alcohols	57-50-1	A	605660	190810	212560	895510	835780	808190	1.22078	2.51675	1.33156	up
mws0906	C16H22O8	Coniferin	Phenolic acids	Phenolic acids	531-29-3	B	22673000	18237000	23631000	14384000	11871000	11802000	1.36863	0.589656	-0.762054	insig
pmb2211	C19H38N2O3	Cocamidopropyl betaine	Alkaloids	Alkaloids	4292-10-8	A	16168	12673	27882	23104	23151	47341	0.881485	1.65005	0.722513	insig
HJAP050	C19H21NO5	N-Feruloyl-3-methoxytyramine	Alkaloids	Phenolamine	78510-19-7	A	26347	25728	82848	48173	257890	313710	1.04866	4.59353	2.1996	up
Lmmn000774	C15H20O9	Dihydrocaffeoylglucose	Phenolic acids	Phenolic acids	-	B	38988	52673	30415	140110	37965	32314	0.481053	1.72343	0.78528	insig
mws0609	C10H12N5O7P	Guanosine 3',5'-cyclic monophosphate	Nucleotides and derivatives	Nucleotides and derivatives	7665-99-8	A	108420	178080	293450	82073	56278	109240	1.12812	0.426918	-1.22797	down
pmb0801	C14H19NO9	4-Pyridoxic acid-O-glucoside	Others	Vitamin	-	A	43208	35788	65559	69396	64937	77846	1.11085	1.46781	0.553663	insig
Lmtn000940	C14H18O10	1-O-(3,4-Dihydroxy-5-methoxy-benzoyl)-glucoside	Phenolic acids	Phenolic acids	-	B	9277.7	3968.4	6205.9	14749	16861	16763	1.32345	2.48679	1.31428	up
pmb0981	C10H14N5O7P	Adenosine 5'-monophosphate	Nucleotides and derivatives	Nucleotides and derivatives	61-19-8	A	3101100	7579100	3578800	3479700	6607700	6831900	0.395994	1.18657	0.246797	insig
mws0874	C10H14N5O7P	3'-Adenylic Acid	Nucleotides and derivatives	Nucleotides and derivatives	84-21-9	A	17735	23069	40323	17761	19619	21434	0.684931	0.724962	-0.464023	insig
pmb1562	C21H34O4	1-Stearidonoyl-Glycerol	Lipids	Glycerol ester	-	B	3521.4	12901	15879	7114.1	2803.9	4021.2	0.82852	0.431535	-1.21245	insig
pmb0770	C20H20N2O4	N-Feruloylserotonin	Alkaloids	Phenolamine	68573-23-9	B	87314	9	9	9	139370	9	0.0444841	1.59607	0.674524	insig
Lmhp011562	C21H36O4	1-α-Linolenoyl-glycerol	Lipids	Glycerol ester	-	A	3437400	7829600	5664300	2416100	2298400	2420100	1.28095	0.421385	-1.24679	down
Lmhp011388	C21H36O4	2-α-Linolenoyl-glycerol	Lipids	Glycerol ester	55268-58-1	A	1447000	3596300	2610300	705430	958390	852200	1.31053	0.328737	-1.605	down
mws0178	C16H18O9	Chlorogenic acid (3-O-Caffeoylquinic acid)*	Phenolic acids	Phenolic acids	327-97-9	A	16176	27129	11022	11983	20895	256090	0.566051	5.31905	2.41117	insig
mws2108	C16H18O9	Cryptochlorogenic acid (4-O-Caffeoylquinic acid)	Phenolic acids	Phenolic acids	905-99-7	B	15100	20782	5843.2	8550.2	7966.1	177760	0.374259	4.65609	2.21912	insig
mws1077	C16H18O9	Scopoletin-7-O-glucoside (Scopolin)	Lignans and Coumarins	Coumarins	531-44-2	A	43393	27320	76661	24587	32794	36514	0.730175	0.637121	-0.650362	insig
pme1816	C16H18O9	Neochlorogenic acid (5-O-Caffeoylquinic acid)*	Phenolic acids	Phenolic acids	906-33-2	A	19276	28148	8520.3	5802.1	18573	272440	0.339037	5.30555	2.4075	insig
Lmhp012042	C21H38O4	2-Linoleoylglycerol	Lipids	Glycerol ester	3443-82-1	A	504830	864500	544690	301470	294710	209640	1.33421	0.421009	-1.24808	down
Lmhp112042	C21H38O4	1-Linoleoylglycerol	Lipids	Glycerol ester	2277-28-3	A	519880	867700	555620	304130	285780	224120	1.35965	0.418912	-1.25528	down
Zmhn002422	C16H20O9	1-O-Feruloyl-D-Glucose	Phenolic acids	Phenolic acids	-	A	14396000	18602000	16609000	13710000	9832300	7769900	1.17817	0.631205	-0.663819	insig
Hmmn002544	C16H20O9	Ferulic acid-4-O-glucoside	Phenolic acids	Phenolic acids	117405-51-3	A	268030	239380	393150	88539	177220	88946	1.26943	0.393872	-1.3442	down
Zmhn002334	C16H20O9	6-O-Feruloyl-D-glucose	Phenolic acids	Phenolic acids	137887-25-3	B	2723400	1760300	1617800	630400	1021800	606170	1.33414	0.370134	-1.43388	down
pmb0296	C21H40O4	1-Oleoyl-Sn-Glycerol	Lipids	Glycerol ester	129784-87-8	A	383860	499580	759230	353840	297520	334700	1.11149	0.600279	-0.736295	insig
pmb3107	C15H20O10	Glucosyringic Acid	Phenolic acids	Phenolic acids	-	B	40717	29322	45952	44077	96691	137440	1.08841	2.39853	1.26215	up
pmb0998	C10H14N5O8P	Guanosine 5'-monophosphate	Nucleotides and derivatives	Nucleotides and derivatives	85-32-5	A	100150	405720	412080	128080	92439	117610	0.973026	0.368352	-1.44084	insig
mws5040	C12H21O11Na	Turanose	Others	Saccharides and Alcohols	547-25-1	B	436670	131850	245460	603550	609790	547740	1.17689	2.16354	1.1134	up
pmb0964	C16H23N5O5	Isopentenyladenine-7-N-glucoside	Nucleotides and derivatives	Nucleotides and derivatives	-	B	39999	9503.7	23951	21299	35908	25597	0.428502	1.1273	0.172865	insig
Lmgp003270	C16H16O10	Scopoletin-7-O-glucuronide	Lignans and Coumarins	Coumarins	132752-65-9	B	413960	257540	216220	144150	107590	46467	1.21468	0.335925	-1.57379	down
pma3724	C17H20O9	1-O-Feruloylquinic acid	Phenolic acids	Phenolic acids	-	B	433530	332470	350590	196760	197180	95959	1.26409	0.438746	-1.18854	down
pmb0752	C17H20O9	3-O-Feruloylquinic acid	Phenolic acids	Phenolic acids	1899-29-2	B	704710	437310	480960	316590	280160	113730	1.14323	0.437763	-1.19178	down
Lmbp002309	C17H22O9	Sinapaldehyde-4-O-Glucoside	Phenolic acids	Phenolic acids	154461-65-1	B	19524	35337	31859	73176	536500	385590	1.27304	11.4768	3.52065	up
pmn001695	C16H20O10	Trihydroxycinnamoylquinic acid	Phenolic acids	Phenolic acids	-	B	85342	79753	71778	224190	206940	172860	1.455	2.54985	1.35041	up
mws0011	C17H24O9	Syringin	Phenolic acids	Phenolic acids	118-34-3	B	38911	37058	49991	572180	1009800	549230	1.4679	16.9197	4.08064	up
mws0232	C17H20N4O6	Riboflavin (Vitamin B2)	Others	Vitamin	83-88-5	A	1787500	1401700	1611200	1891300	1243400	923350	0.609507	0.845357	-0.242368	insig
pme3337	C14H17N5O8	Succinyladenosine	Nucleotides and derivatives	Nucleotides and derivatives	4542-23-8	A	875960	2986100	1427500	1123400	900830	799690	0.85077	0.533867	-0.905449	insig
pme1286	C14H20N6O5S	S-(5'-Adenosy)-L-homocysteine	Amino acids and derivatives	Amino acids and derivatives	979-92-0	A	489020	432470	498290	524890	388990	334890	0.659137	0.879552	-0.18516	insig
Zmhn002227	C17H22O10	4-O-Glucosyl-sinapate	Phenolic acids	Phenolic acids	-	B	6749.5	11991	18272	25065	16832	18826	0.994995	1.64061	0.71423	insig
pmb2940	C17H22O10	1-O-Glucosyl sinapate	Phenolic acids	Phenolic acids	78185-48-5	B	605070	387930	324020	548790	569730	287440	0.161065	1.06753	0.0942783	insig
HJN003	C17H22O10	1-O-Sinapoyl-D-glucose	Phenolic acids	Phenolic acids	-	B	504290	262920	241870	423090	223530	283620	0.150962	0.921869	-0.117366	insig
Lmmp010562	C24H38O4	Diisooctyl Phthalate	Phenolic acids	Phenolic acids	27554-26-3	B	346130	364660	420250	364660	384350	543580	0.576672	1.14283	0.192615	insig
pme2735	C15H22N6O5S	S-Adenosyl-L-methionine	Amino acids and derivatives	Amino acids and derivatives	29908-03-0	B	1690400	1836800	1331400	1297400	1503900	1229700	0.929024	0.829663	-0.269403	insig
Cmjn004337	C18H26O10	Benzyl-(2''-O-xylosyl)glucoside	Phenolic acids	Phenolic acids	-	B	24865	12709	13717	10779	37167	49470	0.647499	1.89928	0.925453	insig
pme3007	C9H14N2O12P2	Uridine 5'-diphosphate	Nucleotides and derivatives	Nucleotides and derivatives	27821-45-0	A	45216	112340	52290	39138	52919	50567	0.704721	0.67966	-0.557114	insig
pmd0152	C19H39O7P	LysoPA 16:0 (2n isomer)	Lipids	Glycerol ester	-	B	9	34372	9	9	5328.6	8498.1	0.315128	0.402318	-1.31359	insig
pmd0153	C19H39O7P	LysoPA 16:0	Lipids	Glycerol ester	22002-85-3	B	9	26993	9	9	10699	9363	0.380772	0.743068	-0.428435	insig
Lmbp003668	C20H18O10	Kaempferol-3-O-arabinoside	Flavonoids	Flavonoid	-	B	1480300	2128100	1318200	692780	94605	37916	1.20489	0.167519	-2.5776	down
pmn001663	C22H26O8	Syringaresinol	Lignans and Coumarins	Lignans	21453-69-0	B	1811.5	608.86	3052.9	1694.7	3015.4	1459.8	0.398605	1.12728	0.172847	insig
mws2523	C12H23O14P	Trehalose 6-phosphate	Others	Saccharides and Alcohols	4484-88-2	B	8076.9	7899.6	8413.4	13200	6757.6	3554.1	0.31264	0.963993	-0.052905	insig
Lmhp008337	C19H40NO7P	LysoPE 14:0(2n isomer)	Lipids	LPE	-	B	13347	44099	19165	13991	7032.8	11636	1.02862	0.426307	-1.23004	down
pmb0864	C19H40NO7P	LysoPE 14:0	Lipids	LPE	-	B	56088	233240	96071	52061	32793	38607	1.1193	0.320346	-1.6423	down
pme2117	C10H15N5O10P2	Adenosine 5'-diphosphate	Nucleotides and derivatives	Nucleotides and derivatives	58-64-0	A	157590	280020	215470	198450	231740	234290	0.158836	1.01746	0.024966	insig
mws0919	C21H20O10	Kaempferol-3-O-rhamnoside (Afzelin)	Flavonoids	Flavonols	482-39-3	A	37332	63849	52065	4006.2	9	9	1.25601	0.0262597	-5.251	down
pme0321	C21H20O10	Kaempferol-7-O-rhamnoside	Flavonoids	Flavonols	20196-89-8	B	33407	32975	26933	8519.7	3028.2	3740.8	1.40369	0.16384	-2.60964	down
Lmtn002324	C19H28O11	Benzyl-(2''-O-glucosyl)glucoside	Phenolic acids	Phenolic acids	-	B	18663	6274.2	17638	37096	23464	27686	1.10138	2.07271	1.05152	up
mws2186	C20H18O11	Avicularin(Quercetin-3-O-α-L-arabinofuranoside)	Flavonoids	Flavonols	572-30-5	A	6415.3	4114.6	363.97	2021500	618300	221300	1.38057	262.634	8.03691	up
Lmdp003509	C20H18O11	Quercetin-3-O-xyloside (Reynoutrin)	Flavonoids	Flavonols	549-32-6	B	8058.6	7802.2	4769.7	2526500	762260	364820	1.44166	177.096	7.46839	up
HJN087	C21H22O10	Naringenin-4'-O-glucoside	Flavonoids	Flavonoid	-	B	29319	79112	43822	49109	76497	54544	0.502159	1.18323	0.242728	insig
mws1179	C21H22O10	Naringenin-7-O-glucoside (Prunin)	Flavonoids	Dihydroflavone	529-55-5	B	37819	39932	23079	34387	13549	13157	0.931606	0.605901	-0.722846	insig
HJN055	C21H24O10	Dihydrocharcone-4'-O-glucoside	Flavonoids	Chalcones	-	A	617940	521230	640300	835680	752530	726970	1.2992	1.30105	0.379677	insig
mws2118	C21H24O10	Phloretin-2'-O-glucoside (Phlorizin)	Flavonoids	Chalcones	60-81-1	A	314010	258980	351180	446860	392430	387830	1.23464	1.32781	0.409046	insig
Lmhp008440	C20H40NO7P	LysoPE 15:1	Lipids	LPE	-	A	2219.3	9963.5	5030.8	9	9	9	1.46852	0.00156853	-9.31637	down
Lmhp008273	C20H40NO7P	LysoPE 15:1(2n isomer)	Lipids	LPE	-	B	706.12	2973.4	927.71	365.38	429.11	586.32	1.1156	0.299705	-1.73838	down
Lmlp003024	C20H30O7N4	N'-p-Coumaroylagmatine-glucoside	Alkaloids	Phenolamine	-	B	84348	76584	160070	15073	9	9	1.19332	0.0470122	-4.41082	down
Lmhp009187	C20H42NO7P	LysoPE 15:0	Lipids	LPE	-	A	41224	113640	70903	30841	19192	22352	1.27494	0.320618	-1.64107	down
Lmhp008885	C20H42NO7P	LysoPE 15:0(2n isomer)	Lipids	LPE	-	A	7691	20299	14066	6943.2	4935.5	7531.4	1.13072	0.46153	-1.1155	down
pme1014	C31H40O2	Menatetrenone (Vitamin K2)	Others	Vitamin	11032-49-8	B	46280	48587	48375	47736	65311	45684	0.567157	1.10813	0.148129	insig
Lmhp007836	C21H38NO7P	LysoPE 16:3	Lipids	LPE	-	A	26683	56733	42348	30246	18767	21024	1.08801	0.556892	-0.84453	insig
Hmcp002316	C21H20O11	Isorhamnetin-3-O-arabinoside	Flavonoids	Flavonols	-	A	48149	67177	68961	853170	1160600	612720	1.4648	14.2522	3.83311	up
mws2209	C21H20O11	Kaempferol-3-O-glucoside (Astragalin)	Flavonoids	Flavonols	480-10-4	B	6709400	10585000	12832000	3370800	618780	383330	1.27059	0.145152	-2.78436	down
Xmyp005654	C21H20O11	Kaempferol-4'-O-glucoside	Flavonoids	Flavonoid	-	A	1424900	1936300	1169100	5295700	970490	654620	0.0209046	1.52767	0.611334	insig
mws0045	C21H20O11	Quercetin-3-O-rhamnoside(Quercitrin)	Flavonoids	Flavonols	522-12-3	B	9	9	9	21135	9	9	0.667766	783.444	9.61369	insig
Hmpp003270	C21H20O11	Luteolin-4'-O-glucoside	Flavonoids	Flavonoid	6920-38-3	A	9270900	12800000	11176000	894970	461650	404310	1.45717	0.0529652	-4.23881	down
mws0913	C21H20O11	Kaempferol-3-O-galactoside (Trifolin)	Flavonoids	Flavonols	23627-87-4	B	13955	30359	21714	191690	125880	124680	1.42497	6.69792	2.74371	up
Lmlp003531	C21H20O11	Luteolin-3'-O-glucoside	Flavonoids	Flavonoid	5154-41-6	A	7955800	11524000	12408000	956150	424090	429110	1.44863	0.0567411	-4.13946	down
pme2459	C21H20O11	Luteolin-7-O-glucoside (Cynaroside)	Flavonoids	Flavonoid	5373-11-5	A	4450000	3165000	2633900	2672200	1186400	374480	1.01708	0.413028	-1.27569	down
HJN086	C21H22O11	Eriodictyol-3'-O-glucoside	Flavonoids	Dihydroflavone	-	B	9	9	1542.6	17200	9350.3	5731.6	1.24908	20.6856	4.37055	up
Lmtn002796	C21H22O11	Aromadendrin-7-O-glucoside	Flavonoids	Flavonoid	28189-90-4	B	603880	535660	550250	137710	101510	136660	1.46845	0.222442	-2.1685	down
mws0057	C21H22O11	Eriodictyol-7-O-glucoside	Flavonoids	Dihydroflavone	38965-51-4	B	98693	56940	74542	44423	33295	18893	1.22035	0.419728	-1.25247	down
Lmmn004625	C21H22O11	Dihydrokaempferol-7-O-glucoside	Flavonoids	Flavonols	-	B	40412	36211	23649	3574.6	2537	901.55	1.40478	0.0699413	-3.83771	down
Lmhp008763	C21H42NO7P	LysoPE 16:1(2n isomer)	Lipids	LPE	-	A	34661	65767	48455	26028	17459	16262	1.31429	0.401315	-1.31719	down
Lmhp009034	C21H42NO7P	LysoPE 16:1	Lipids	LPE	-	A	108180	331840	147740	90248	44510	62989	1.18604	0.336442	-1.57157	down
HJN041	C21H24O11	Epicatechin glucoside	Flavonoids	Flavanols	-	B	13738	11079	6694.9	8182.3	8371.9	4076.3	0.822369	0.654689	-0.611118	insig
pmd0160	C21H44NO7P	LysoPE 16:0(2n isomer)	Lipids	LPE	-	A	1236400	4181300	2122200	1183100	716340	1014800	1.11468	0.386509	-1.37143	down
pmb0876	C21H44NO7P	LysoPE 16:0	Lipids	LPE	53862-35-4	A	5161700	19769000	10975000	4087900	2966800	4007200	1.1854	0.308082	-1.69861	down
Lmhp005872	C25H30N2O6	Diferuloylcadaverine	Alkaloids	Phenolamine	-	B	9	9	9	9	9	7312	0.63567	271.481	8.08471	insig
mws4053	C30H48O3	Ursolic acid	Terpenoids	Triterpene	77-52-1	B	8968.1	10004	8397.9	8129.3	9260.4	9070.6	0.383942	0.966763	-0.048766	insig
pmb2654	C19H27NO12	Anthranilate-1-O-Sophoroside	Phenolic acids	Phenolic acids	-	B	189340	43215	63127	312490	156680	174700	1.02667	2.17758	1.12272	up
Lmzn001894	C21H18O12	Kaempferol-3-O-glucuronide	Flavonoids	Flavonols	22688-78-4	A	5085600	4329600	5181000	2012400	914080	803490	1.36699	0.255544	-1.96836	down
mws4167	C21H18O12	Luteolin-7-O-glucuronide	Flavonoids	Flavonoid	29741-10-4	A	17339000	16565000	15231000	5438900	2935200	3433700	1.43431	0.240313	-2.05701	down
Lmmp003767	C21H18O12	Kaempferol-7-O-glucuronide	Flavonoids	Flavonols	-	B	22636000	22412000	31812000	14959000	12948000	10739000	1.34266	0.50281	-0.991914	insig
Hmcp002539	C22H22O11	Isorhamnetin-3-O-rhamnoside	Flavonoids	Flavonols	-	B	7624.3	10076	18094	20175	42577	12070	0.91613	2.09033	1.06373	insig
pmp000579	C22H22O11	Diosmetin-7-O-galactoside	Flavonoids	Flavonoid	-	A	228990	218570	231980	479000	295530	206870	0.808365	1.44421	0.530283	insig
mws1329	C21H20O12	Quercetin-7-O-glucoside*	Flavonoids	Flavonols	491-50-9	A	18287	19521	13370	1697700	726790	656380	1.46154	60.1991	5.91167	up
mws0091	C21H20O12	Quercetin-3-O-glucoside (Isoquercitrin)*	Flavonoids	Flavonols	482-35-9	A	47499	24988	31777	3077700	1189600	1273900	1.45795	53.1459	5.73189	up
mws0061	C21H20O12	Quercetin-3-O-galactoside (Hyperin)	Flavonoids	Flavonols	482-36-0	A	67859	45321	56894	4843700	1841500	1941000	1.46019	50.7203	5.66449	up
Lmdp003286	C21H20O12	Isohyperoside	Flavonoids	Flavonols	35589-21-0	A	847470	972240	892050	26260000	9475900	6042700	1.40446	15.4065	3.94546	up
Lmzp002365	C22H24O11	Hesperetin-7-O-glucoside	Flavonoids	Flavonoid	31712-49-9	B	103680	42212	76506	974360	1316300	904850	1.45432	14.3684	3.84483	up
pme1598	C22H24O11	Hesperetin-5-O-glucoside	Flavonoids	Dihydroflavonol	69651-80-5	B	36217	24931	26674	2741000	1382900	764750	1.45628	55.6654	5.79871	up
Lmhp009464	C22H44NO7P	LysoPE 17:1(2n isomer)	Lipids	LPE	-	A	17111	61212	35163	12037	7139.4	13432	1.21426	0.287334	-1.7992	down
Lmhp009769	C22H44NO7P	LysoPE 17:1	Lipids	LPE	-	A	18614	63149	32045	13564	9323.7	9538.3	1.24869	0.284918	-1.81138	down
Xmsn002700	C21H22O12	Taxifolin-3'-O-glucoside	Flavonoids	Flavonoid	31106-05-5	B	9	9	9	67881	24052	22782	1.47559	4248.7	12.0528	up
pmd0130	C22H46NO7P	LysoPC 14:0	Lipids	LPC	20559-16-4	A	35273	65416	38841	26570	22111	23150	1.26186	0.514807	-0.957897	insig
Zmhn002508	C21H28O12	4-p-Cumaroyl-rhamnosyl-(1→6)-D-glucose	Phenolic acids	Phenolic acids	-	B	9	9	9	39750	52453	3731.1	1.45291	3553.11	11.7949	up
Lmsn012425	C30H48O4	Rubusic acid (3β,7α-Dihydroxyolean-12-en-28-oic acid)	Terpenoids	Triterpene	23984-26-1	A	5002.5	25951	21727	6065.3	3017.9	6308.9	1.01779	0.292178	-1.77508	down
pmb1912	C20H23N7O7	10-Formyltetrahydrofuran	Alkaloids	Alkaloids	2800-34-2	B	143940	92239	145270	145890	68623	70526	0.72699	0.747253	-0.420331	insig
Lmhp008233	C23H40NO7P	LysoPE 18:4	Lipids	LPE	-	A	3035.4	7087.9	4909.7	2165	1968.9	1065.3	1.24734	0.345852	-1.53177	down
Lmhp008589	C23H42NO7P	LysoPE 18:3(2n isomer)	Lipids	LPE	-	A	2121900	6996300	4204200	2149500	2227600	1583400	1.03394	0.447404	-1.16035	down
Lmhp008801	C23H42NO7P	LysoPE 18:3	Lipids	LPE	-	A	1967200	6253700	2760600	1969600	1459600	1497700	1.04224	0.448655	-1.15632	down
pmp000583	C22H20O12	Diosmetin-7-O-glucuronide	Flavonoids	Flavonoid	35110-20-4	B	1486300	2884200	1679400	972510	736570	309280	1.21189	0.333619	-1.58373	down
pmb0874	C23H44NO7P	LysoPE 18:2(2n isomer)	Lipids	LPE	-	A	11036000	31849000	20624000	9423600	8147300	6237100	1.19813	0.374876	-1.41551	down
pmb0881	C23H44NO7P	LysoPE 18:2	Lipids	LPE	-	A	6543400	17049000	8785200	5363600	3760400	3928800	1.20855	0.403143	-1.31064	down
Lmmp003783	C21H18O13	Quercetin-3-O-glucuronide	Flavonoids	Flavonols	22688-79-5	B	110810	36439	90207	4756500	4697400	3512000	1.46374	54.6034	5.77092	up
Lmfn003760	C21H18O13	Quercetin-4′-O-glucuronide	Flavonoids	Flavonols	201463-36-7	A	484820	422690	396430	3594500	2719900	1860300	1.44963	6.26923	2.64829	up
Hmjp003123	C21H18O13	Quercetin-5-O-glucuronide	Flavonoids	Flavonols	-	B	1245100	863580	890610	11353000	8410600	3516100	1.39348	7.76174	2.95638	up
Zmhn004909	C21H18O13	3,4-Digalloylshikimic acid	Phenolic acids	Phenolic acids	-	B	13789	13883	15731	115870	102740	71348	1.4665	6.6806	2.73998	up
Lmjp003044	C22H22O12	Isorhamnetin-3-O-Glucoside*	Flavonoids	Flavonols	5041-82-7	A	433840	408880	423280	8450200	10174000	6486600	1.47756	19.8348	4.30996	up
Hmcp002207	C22H22O12	Isorhamnetin-7-O-glucoside (Brassicin)*	Flavonoids	Flavonols	6743-96-0	A	458300	380010	403490	8509400	9651600	6467100	1.47764	19.8326	4.3098	up
Lmnn002886	C23H26O11	1'-O-(3,4-Dihydroxyphenethyl)-O-caffeoyl-glucoside	Phenolic acids	Phenolic acids	-	B	3654400	3309100	3588700	30632000	21474000	15856000	1.45331	6.44055	2.68718	up
pmb2260	C23H46NO7P	LysoPC 15:1	Lipids	LPC	-	A	7239.5	26033	10985	3394.7	4895.8	5289.1	1.19178	0.306832	-1.70448	down
mws0289	C23H46NO7P	LysoPE 18:1	Lipids	LPE	89576-29-4	A	1217600	2661400	2137500	1285400	951080	1368600	1.01486	0.599199	-0.738893	insig
pmb0856	C23H46NO7P	LysoPE 18:1(2n isomer)	Lipids	LPE	-	A	1094700	2572200	2989000	1106000	1105600	1221700	1.00123	0.515828	-0.955038	insig
pmb0883	C23H48NO7P	LysoPE 18:0	Lipids	LPE	69747-55-3	A	24472	89637	44725	19017	14395	21194	1.15343	0.343793	-1.54039	down
pmb2319	C23H48NO7P	LysoPC 15:0	Lipids	LPC	108273-89-8	A	87974	179680	119830	68795	49410	58745	1.27595	0.456664	-1.13079	down
pmb0880	C23H48NO7P	LysoPE 18:0(2n isomer)	Lipids	LPE	-	A	15746	34022	28745	16283	13827	17208	1.02908	0.602677	-0.730542	insig
Lmhp009129	C23H48NO7P	LysoPC 15:0(2n isomer)	Lipids	LPC	-	A	23640	35513	27864	18417	10627	11493	1.30988	0.465852	-1.10206	down
pmb3072	C22H26O12	3-O-p-Coumaroylshikimic acid-O-glucoside	Phenolic acids	Phenolic acids	-	B	34816	19969	21809	11993	6566	16258	1.18526	0.454566	-1.13744	down
Hmyn007168	C22H45O9P	LysoPG 16:0	Lipids	Glycerol ester	-	B	2631800	6802300	6049800	2799600	3210600	2326100	0.972258	0.538385	-0.89329	insig
pmn001707	C30H46O5	Quillaic acid	Phenolic acids	Phenolic acids	631-01-6	B	1157500	1313400	2235100	1129600	832320	1307800	0.84944	0.694798	-0.525334	insig
Lmsp005625	C22H18O13	3-O-Methylellagic acid-4'-O-(5''-O-acetyl)arabinoside	Tannins	Tannin	-	B	9	9	9	9	3511.5	9	0.682768	130.722	7.03036	insig
Lmmn003398	C23H22O12	Kaempferol-3-O-(6''-acetyl)glucoside	Flavonoids	Flavonols	-	B	132720	115150	96282	50225	3865.8	12380	1.2192	0.193144	-2.37225	down
pma1303	C24H46NO7P	LysoPC 16:2	Lipids	LPC	-	A	85740	207210	126780	84746	60417	68462	1.12191	0.508958	-0.974381	insig
pmb0863	C24H46NO7P	LysoPC 16:2(2n isomer)	Lipids	LPC	-	A	30273	77254	32368	27864	26357	22100	0.958458	0.545559	-0.874192	insig
pmp001270	C24H48NO7P	LysoPC 16:1	Lipids	LPC	76790-27-7	A	298370	707400	322100	274730	185530	195680	1.09103	0.493979	-1.01748	down
Lmhp008833	C24H48NO7P	LysoPC 16:1(2n isomer)	Lipids	LPC	-	A	217770	543720	289760	167640	156660	120370	1.20375	0.422992	-1.2413	down
HJN054	C25H34O10	Secoisolariciresinol-9'-O-xyloside	Lignans and Coumarins	Lignans	-	B	70150	79589	100560	130310	79304	169590	0.887609	1.515	0.599322	insig
pmb0855	C24H50NO7P	LysoPC 16:0	Lipids	LPC	17364-16-8	A	16464000	42906000	23244000	12009000	11142000	13401000	1.18681	0.442443	-1.17644	down
pmd0132	C24H50NO7P	LysoPC 16:0(2n isomer)	Lipids	LPC	-	A	2832800	6696400	3789300	2248900	1956300	2481500	1.15445	0.502061	-0.994065	insig
Lmhp010040	C25H46NO7P	LysoPE 20:3	Lipids	LPE	-	A	10230	41778	16327	10110	6415.3	7044.1	1.08096	0.34491	-1.53571	down
Lmhp009802	C25H46NO7P	LysoPE 20:3(2n isomer)	Lipids	LPE	-	A	9820.9	45046	16330	10023	7244	8157.8	1.01227	0.357105	-1.48558	down
HJAP135	C24H24O12	Pinocembrin-7-O-(6''-O-malonyl)glucoside	Flavonoids	Flavonoid	-	A	3318300	2226000	2306100	1848000	582400	426060	1.16475	0.363862	-1.45854	down
Lmsn009589	C30H48O6	2α,3β,19α,23-Tetrahydroxyurs-12-en-28-oic acid	Terpenoids	Triterpene	-	B	1452.1	1603.8	1420.4	3662.4	1979.9	1258.9	0.719598	1.54172	0.624541	insig
Lmhp010514	C25H48NO7P	LysoPE 20:2(2n isomer)	Lipids	LPE	-	A	7661.7	32325	11652	6686.2	5039.3	5517.5	1.08647	0.333916	-1.58244	down
Lmhp008718	C25H48NO7P	LysoPC 17:2	Lipids	LPC	-	A	32236	129640	46123	18258	15106	12297	1.25388	0.219525	-2.18754	down
Lmhp010757	C25H48NO7P	LysoPE 20:2	Lipids	LPE	-	A	19265	109890	36410	18471	10828	13181	1.08945	0.256576	-1.96254	down
Hmln002199	C23H22O13	Quercetin-3-O-(6''-acetyl)galactoside	Flavonoids	Flavonols	-	B	2966.2	1853.9	9	67592	7041.6	14771	1.03225	18.5137	4.21052	up
Lmhp009590	C25H50NO7P	LysoPC 17:1	Lipids	LPC	-	A	36866	95585	50845	27309	24675	28807	1.19049	0.440768	-1.18191	down
Lmhp010515	C25H52NO7P	LysoPC 17:0(2n isomer)	Lipids	LPC	-	A	22348	38881	30843	20504	14252	16156	1.23984	0.552959	-0.854757	insig
pmb2406	C25H52NO7P	LysoPC 17:0	Lipids	LPC	50930-23-9	A	14059	23413	19249	12618	12069	14737	1.10161	0.695051	-0.524809	insig
Lmhp009526	C27H46O9	2-α-Linolenoyl-glycerol-1-O-glucoside	Lipids	Glycerol ester	-	A	94485	117980	178600	86933	96026	121070	0.697315	0.777439	-0.363199	insig
Lmhp009773	C27H46O9	1-α-Linolenoyl-glycerol-3-O-glucoside	Lipids	Glycerol ester	-	A	170740	325770	197380	153020	137360	199750	0.886647	0.706351	-0.501543	insig
Hmqp006235	C26H46NO7P	LysoPC 18:4	Lipids	LPC	-	A	9839.4	32709	11356	8564.7	10964	6322.4	0.886694	0.479573	-1.06018	insig
Zmhn000785	C19H32O16	Di-O-Glucosylquinic acid	Phenolic acids	Phenolic acids	-	A	227210	66908	146330	215290	156950	146840	0.51628	1.17853	0.236985	insig
Lmhp010334	C27H48O9	2-Linoleoylglycerol-1-O-glucoside	Lipids	Glycerol ester	-	A	2142.4	7624	6582.3	2769.2	4591.8	2642.2	0.594414	0.611865	-0.708714	insig
Lmhp010573	C27H48O9	1-Linoleoylglycerol-3-O-glucoside	Lipids	Glycerol ester	-	A	4232.2	15247	7737	4046.3	4262	6658.2	0.792428	0.549911	-0.862729	insig
pmb0865	C26H48NO7P	LysoPC 18:3(2n isomer)	Lipids	LPC	-	A	10737000	22890000	11637000	10911000	8697800	9229100	0.936748	0.637105	-0.650398	insig
pmb0854	C26H48NO7P	LysoPC 18:3	Lipids	LPC	-	A	10568000	24512000	11599000	10481000	8289500	9548400	0.931739	0.606673	-0.721008	insig
Hmbn002692	C22H30O14	6'-O-Feruloyl-D-sucrose	Phenolic acids	Phenolic acids	118230-77-6	B	1051500	592530	527920	625970	367580	159060	0.916036	0.53068	-0.914086	insig
pmp001251	C26H50NO7P	LysoPC 18:2(2n isomer)	Lipids	LPC	-	A	1395900	4967200	2105300	1091200	977610	820480	1.15599	0.341185	-1.55137	down
pmp001273	C26H50NO7P	LysoPC 18:2	Lipids	LPC	-	A	1001200	2507300	1139900	803270	612490	685610	1.15236	0.452063	-1.1454	down
Li512111	C24H24O13	Isorhamnetin-3-O-(6''-acetylglucoside)	Flavonoids	Flavonols	-	B	2588.5	9	9	7755.1	4139.9	6345.6	1.14248	6.99812	2.80697	up
Lmhp010190	C26H52NO7P	LysoPC 18:1(2n isomer)	Lipids	LPC	-	A	16024000	44715000	28779000	14806000	16220000	16880000	1.00496	0.535155	-0.901971	insig
pmp001281	C26H52NO7P	LysoPC 18:1	Lipids	LPC	-	A	8291800	17791000	10832000	9509800	7724300	10084000	0.726656	0.740031	-0.434342	insig
mws0126	C26H54NO7P	LysoPC 18:0	Lipids	LPC	19420-57-6	A	272160	780920	422500	241950	212180	246150	1.09036	0.474579	-1.07528	down
pmd0136	C26H54NO7P	LysoPC 18:0(2n isomer)	Lipids	LPC	-	A	34820	72905	38227	62064	38546	51026	0.180617	1.03894	0.0551183	insig
Lmhp007840	C27H52NO7P	LysoPC 19:2	Lipids	LPC	-	A	6838.4	33061	21970	6357.8	5475.2	5163.9	1.12685	0.274722	-1.86395	down
Lmhp007598	C27H52NO7P	LysoPC 19:2(2n isomer)	Lipids	LPC	-	A	7641.1	16407	18184	10291	7592.3	6169.2	0.93989	0.569531	-0.812153	insig
pmp000587	C24H22O14	Luteolin-7-O-(6''-malonyl)glucoside	Flavonoids	Flavonoid	-	A	17920	11612	24509	4384.7	9	9	1.17586	0.0814696	-3.61759	down
Lmdp004892	C24H22O14	Kaempferol-3-O-(6''-malonyl)galactoside	Flavonoids	Flavonols	-	A	2022500	2663000	3069300	489890	68537	111390	1.35898	0.0863745	-3.53325	down
Lmhp010908	C27H54NO7P	LysoPC 19:1	Lipids	LPC	-	A	8736.6	41794	16351	7380.1	9475.5	8397.6	0.964776	0.377581	-1.40514	insig
Zmfn000481	C14H22N2O16P2	Uridine-5'-Diphosphate-D-Xylose	Nucleotides and derivatives	Nucleotides and derivatives	3616-06-6	B	344950	487600	286510	223870	245840	139760	1.17292	0.544627	-0.87666	insig
pmb0824	C25H28O13	Syringic acid-4-O-(6''-feruloyl)glucoside	Phenolic acids	Phenolic acids	-	B	35030	34288	44227	20130	20155	12522	1.3318	0.465076	-1.10446	down
pmb2228	C27H56NO7P	LysoPC 19:0	Lipids	LPC	108273-88-7	A	6144.6	5358.5	4290.2	8222.1	3645.6	1736	0.487419	0.861359	-0.215314	insig
Lmdn001925	C26H34O12	Olivil-4'-O-glucoside	Lignans and Coumarins	Lignans	76880-93-8	B	99834	95267	79423	65810	55808	77408	1.22191	0.724986	-0.463975	insig
pmp001282	C28H50NO7P	Propyl 2-(trimethylammonio)ethyl phosphate	Others	Others	-	A	811950	1791900	1008000	890910	729420	910980	0.797497	0.700835	-0.512854	insig
Lmhp009890	C28H52NO7P	LysoPC 20:3	Lipids	LPC	1199257-41-4	A	34876	101590	43636	39797	31885	32795	0.830936	0.580099	-0.785629	insig
pmd0147	C28H54NO7P	LysoPC 20:2	Lipids	LPC	-	A	78856	292860	117180	83370	65773	69509	0.959252	0.447236	-1.16089	insig
pmd0146	C28H54NO7P	LysoPC 20:2(2n isomer)	Lipids	LPC	-	A	24436	91141	32121	28184	22489	21402	0.845541	0.487989	-1.03508	insig
pmb0608	C25H24O14	Chrysoeriol-7-O-(6''-malonyl)glucoside	Flavonoids	Flavonoid	-	A	102480	48679	87248	67849	12990	15998	1.04305	0.406184	-1.2998	down
Lmhp011549	C28H56NO7P	LysoPC 20:1	Lipids	LPC	-	A	18088	67089	31659	11915	16675	23254	0.964213	0.443733	-1.17224	insig
Hmln002189	C24H22O15	Quercetin-3-O-(6''-malonyl)galactoside	Flavonoids	Flavonols	-	A	9	9	9	154400	19356	25417	1.46355	7376.78	12.8488	up
mws1138	C24H26N2O13	Betanin (Betanidin-5-O-glucoside)	Alkaloids	Alkaloids	7659-95-2	B	2526.2	5640.2	3031.5	49413	17899	5337	1.12021	6.48773	2.69771	up
Rfmb25702	C28H34O12	Pinoresinol-4-O-(6''-acetyl)glucoside	Lignans and Coumarins	Lignans	-	B	69866	77697	134320	15096	3268.3	5226.5	1.38454	0.08369	-3.5788	down
HJAP064	C25H24O15	Isorhamnetin-3-O-(6''-malonylglucoside)	Flavonoids	Flavonoid	-	B	18891	10648	14363	119370	56628	63814	1.40486	5.46244	2.44955	up
pmb2922	C15H24N2O17P2	Uridine 5'-diphospho-D-glucose	Nucleotides and derivatives	Nucleotides and derivatives	133-89-1	A	1522700	1610400	1428500	1237500	1648000	1267400	0.67022	0.910404	-0.135421	insig
Lmmp003306	C25H26O15	Quercetin-3-O-xylosyl(1→2)arabinoside	Flavonoids	Flavonols	-	A	32109	32363	36613	1350600	1395700	1497800	1.47994	41.9855	5.39182	up
Zmxp005470	C26H26O15	Tricin-7-O-(6''-O-malonyl)glucoside	Flavonoids	Flavonoid	-	B	9	9	9	30219	18939	40047	1.47668	3303.89	11.6899	up
mws0047	C27H30O14	Apigenin-7-O-neohesperidoside (Rhoifolin)	Flavonoids	Flavonoid	17306-46-6	B	35303	50194	37921	25498	39137	41737	0.59666	0.861884	-0.214434	insig
HJAP148	C26H28O15	Kaempferol-3-O-sambubioside	Flavonoids	Flavonoid	27661-51-4	A	17980000	15097000	15332000	2856000	2148100	3888100	1.45464	0.183689	-2.44466	down
pmb0492	C34H37N3O6	N',N'',N'''-p-Coumaroyl-cinnamoyl-caffeoyl spermidine	Alkaloids	Phenolamine	-	B	88056	250620	238820	178750	119780	61219	0.651563	0.622946	-0.68282	insig
Hmgp003641	C28H32O14	Chrysoeriol-6-C-rhamnoside-7-O-rhamnoside	Flavonoids	Flavonoid	-	B	12988	11137	16137	46335	65920	62663	1.45258	4.34449	2.11919	up
pmp001288	C28H32O14	Acacetin-7-O-rutinoside (Linarin)	Flavonoids	Flavonoid	480-36-4	A	442270	364960	454500	1571300	2299800	2333700	1.45668	4.91769	2.29798	up
mws1290	C30H26O13	Kaempferol-3-O-(6''-p-Coumaroyl)glucoside (Tiliroside)	Flavonoids	Flavonols	20316-62-5	B	9	9	9	61914	81648	75571	1.48022	8116.04	12.9866	up
Hmjn004446	C30H26O13	Luteolin-7-O-(6''-caffeoyl)rhamnoside	Flavonoids	Flavonoid	-	B	596500	622230	914860	72288	39838	31910	1.44596	0.0675088	-3.88878	down
Lmsp004670	C27H30O15	Kaempferol-3-O-glucoside-7-O-rhamnoside	Flavonoids	Flavonols	-	A	2012700	1668700	1729600	1109400	872920	1527200	1.1981	0.64859	-0.624622	insig
pmp001079	C27H30O15	Luteolin-7-O-neohesperidoside (Lonicerin)*	Flavonoids	Flavonoid	25694-72-8	A	221730	133500	102020	91677	37728	23096	1.16909	0.333518	-1.58416	down
pmp000593	C27H30O15	Luteolin-7-O-rutinoside*	Flavonoids	Flavonoid	3563-98-2	A	2079900	1538300	1407800	1127000	590300	345820	1.18617	0.410489	-1.28458	down
Lmjp002867	C27H30O15	Kaempferol-3-O-neohesperidoside*	Flavonoids	Flavonols	32602-81-6	A	1708900	1465900	1939100	1214700	873290	1701700	0.931117	0.741057	-0.432344	insig
Lmsn002815	C27H30O15	Kaempferol-3-O-rutinoside(Nicotiflorin)*	Flavonoids	Flavonoid	17650-84-9	A	3995000	4965400	5280600	1419100	1440300	3902500	1.17081	0.474819	-1.07455	down
Zmcp003989	C27H30O15	Kaempferol-3-O-rhamnosyl(1→2)glucoside	Flavonoids	Flavonoid	-	A	1001900	1309500	938900	86174	50820	39328	1.45876	0.0542479	-4.20429	down
Lmjp002596	C26H28O16	Quercetin-3-O-sambubioside	Flavonoids	Flavonols	83048-35-5	A	12071	26853	28696	1277100	1691200	1562700	1.4669	67.0068	6.06624	up
Lmtp004044	C26H28O16	Quercetin-3-O-apiosyl(1→2)galactoside	Flavonoids	Flavonols	-	B	486360	520990	577600	36182000	38139000	36845000	1.48043	70.1385	6.13213	up
Lmqn000780	C17H27N3O17P2	Uridine 5'-diphospho-N-acetylglucosamine	Alkaloids	Alkaloids	528-04-1	B	28248	28182	21294	26592	25489	16462	0.523682	0.881877	-0.181351	insig
Hmjp003008	C27H28O16	Luteolin-7-O-glucuronide-5-O-rhamnoside	Flavonoids	Flavonoid	-	A	13013000	19432000	18961000	2260400	3708600	4167300	1.42954	0.197181	-2.34241	down
pmp001080	C28H32O15	Diosmetin-7-O-Neohesperidoside (Neodiosmin)	Flavonoids	Flavonoid	38665-01-9	B	123100	204460	153660	65406	64371	64426	1.41064	0.403564	-1.30913	down
Lmmp003091	C27H30O16	Quercetin-3-O-(4''-O-glucosyl)rhamnoside	Flavonoids	Flavonols	59262-54-3	B	5008.5	8681.6	7796	267810	140220	179840	1.46196	27.3605	4.77402	up
Lmsp004166	C27H30O16	Quercetin-3-O-glucoside-7-O-rhamnoside	Flavonoids	Flavonols	-	B	51296	36388	60012	2888000	3555200	3076800	1.47854	64.4567	6.01026	up
mws0059	C27H30O16	Quercetin-3-O-rutinoside (Rutin)	Flavonoids	Flavonols	153-18-4	A	22462	18558	27701	1539300	1365500	1443300	1.47935	63.2718	5.98349	up
Lmbp002336	C27H30O16	Quercetin-3-O-(2''-O-rhamnosyl)galactoside	Flavonoids	Flavonols	-	B	162950	111300	179410	8716800	9624600	9991800	1.47814	62.4547	5.96474	up
Lmjp002461	C27H30O16	Quercetin-3-O-neohesperidoside	Flavonoids	Flavonols	117611-67-3	A	57211	41762	55138	3211900	2848600	3083700	1.47938	59.3352	5.89082	up
Lmyn001269	C27H30O16	Kaempferol-3-O-sophoroside	Flavonoids	Flavonoid	19895-95-5	B	516810	653180	369670	729980	366930	383700	0.184451	0.961647	-0.0564201	insig
mws4134	C20H32N6O12S2	Oxiglutatione	Amino acids and derivatives	Amino acids and derivatives	27025-41-8	A	1360700	1245000	1714500	1350200	1693400	1215000	0.041476	0.985741	-0.0207189	insig
Rfmb26201	C30H38O14	Syringaresinol-4'-O-(6''-acetyl)glucoside	Lignans and Coumarins	Lignans	-	B	75200	35905	75406	59696	18099	21422	0.919593	0.531963	-0.910601	insig
Hmjp002999	C28H32O16	Isorhamnetin-3-O-rutinoside (Narcissin)	Flavonoids	Flavonoid	604-80-8	B	45029	108530	78898	3932600	4737400	2189000	1.45911	46.714	5.54578	up
Zmxp002867	C28H32O16	Chrysoeriol-5,7-di-O-glucoside	Flavonoids	Flavonoid	-	B	31899	15636	58263	213630	131050	132090	1.33086	4.50642	2.17198	up
Lmsp004045	C28H32O16	Isorhamnetin-3-O-glucoside-7-O-rhamnoside	Flavonoids	Flavonols	-	A	1581.8	5311	4198.5	13111	22721	29185	1.3288	5.86198	2.55139	up
pme1540	C28H32O16	Isorhamnetin-3-O-neohesperidoside	Flavonoids	Flavonols	55033-90-4	A	5808.8	4753.5	2077.5	24950	27518	23592	1.3976	6.0175	2.58916	up
Hmln002149	C29H36O15	Acteoside	Phenolic acids	Phenolic acids	61276-17-3	B	9	9	11479	13275	9541	11665	1.06139	2.99913	1.58454	up
pmp000596	C27H30O17	Quercetin-3-O-(2''-O-galactosyl)glucoside	Flavonoids	Flavonols	56782-99-1	A	17268	14800	26272	23613	29449	23334	0.940481	1.3095	0.389012	insig
Lmtp003677	C27H30O17	Quercetin-3-O-sophoroside (Baimaside)	Flavonoids	Flavonols	18609-17-1	B	4618.2	9	9	96100	61466	49597	1.26477	44.6838	5.48168	up
Lmsp003729	C27H30O17	Myricetin-3-O-rutinoside	Flavonoids	Flavonols	-	B	9	9	9	208030	233110	389080	1.47837	30748.9	14.9082	up
Hmlp002975	C28H30O17	Isorhamnetin-3-O-glucuronide-7-O-rhamnoside	Flavonoids	Flavonols	-	B	7448.2	13143	20425	100860	337700	241310	1.40655	16.5756	4.05099	up
Lmmp002560	C27H28O18	Quercetin-3-O-(2''-O-glucosyl)glucuronide	Flavonoids	Flavonols	-	B	9	9	9	171140	146950	116410	1.48057	16092.6	13.9741	up
Hmcp001578	C28H32O17	Isorhamnetin-3,7-O-diglucoside	Flavonoids	Flavonols	6758-51-6	B	9	9	9	94839	73497	82040	1.48012	9273.19	13.1788	up
mws1506	C29H36O16	Plantamajoside	Phenolic acids	Phenolic acids	104777-68-6	B	12619	12305	16586	15345	15885	26723	0.885013	1.39612	0.481424	insig
pmb0530	C21H27N7O14P2	Nicotinic acid adenine dinucleotide	Nucleotides and derivatives	Nucleotides and derivatives	53-84-9	A	3537500	3000600	3047000	3176000	2868400	2530200	0.808055	0.894576	-0.160724	insig
Lmhp008744	C33H56O14	1-α-Linolenoyl-glycerol-2,3-di-O-glucoside	Lipids	Glycerol ester	-	A	110460	288130	265270	298910	91348	177020	0.304703	0.854515	-0.226823	insig
Lmhp008513	C33H56O14	2-α-Linolenoyl-glycerol-1,3-di-O-glucoside	Lipids	Glycerol ester	-	A	242530	381650	480270	264380	229610	295870	0.857618	0.715161	-0.483659	insig
Lmhp009190	C33H58O14	2-Linoleoylglycerol-1,3-di-O-glucoside	Lipids	Glycerol ester	-	A	18459	30982	39617	11976	10981	8864.4	1.32276	0.357311	-1.48475	down
Lmhp009384	C33H58O14	1-Linoleoylglycerol-2,3-di-O-glucoside	Lipids	Glycerol ester	-	A	10621	17990	13712	7876.2	12061	9144.6	1.0136	0.687139	-0.541325	insig
Lmmn004145	C38H60O10	3-O-(2-O-Acetyl-glucosyl)oleanolic acid	Terpenoids	Triterpene	-	A	8279200	14132000	13660000	5443800	5071100	5486300	1.35579	0.4436	-1.17267	down
Lmsn006130	C36H56O12	2α,3β,19α-Trihydroxyurs-12-en-23,28-dioic acid-28-O-glucoside	Terpenoids	Triterpene	-	A	10315	9366.7	10224	19495	29105	29544	1.41913	2.61301	1.38571	up
Lmmp003266	C29H30O19	Quercetin-3-O-(2''-malonyl)glucoside-7-O-arabinoside	Flavonoids	Flavonols	-	A	9	9	9	62213	24699	40980	1.47672	4736.74	12.2097	up
pmn001370	C32H42O16	Pinoresinol-4,4'-O-di-O-glucoside	Lignans and Coumarins	Lignans	63902-38-5	B	152670	193850	282140	95919	202790	171460	0.684572	0.747891	-0.419101	insig
pmn001368	C32H44O17	Olivil-4,4'-Di-O-glucoside	Lignans and Coumarins	Lignans	-	B	126340	184070	181520	92508	105090	92099	1.31929	0.588899	-0.763908	insig
Xmyp004678	C32H38O19	Kaempferol-3-O-(2-O-Xylosyl-6-O-Rhamnosyl)Glucoside	Flavonoids	Flavonoid	-	A	9	9	9	132130	104560	60252	1.47984	10997.9	13.4249	up
Zmlp003063	C33H40O19	Luteolin-7-O-(2''-O-rhamnosyl)rutinoside	Flavonoids	Flavonoid	-	B	1478400	1940800	1648200	104550	71224	43086	1.45736	0.0431898	-4.53317	down
Lmsp003881	C33H40O19	Kaempferol-3-O-rutinoside-7-O-rhamnoside	Flavonoids	Flavonols	-	A	34079000	44712000	36298000	3116600	2554300	2068500	1.47162	0.0672471	-3.89438	down
mws1035	C33H40O19	Kaempferol-3-O-robinoside-7-O-rhamnoside (Robinin)	Flavonoids	Flavonols	301-19-9	B	20867	14279	27684	24653	46096	34375	1.05679	1.67315	0.742567	insig
HJAP061	C32H38O20	Quercetin-3-O-(2''-O-arabinosyl)rutinoside	Flavonoids	Flavonols	-	A	87635	110380	108220	2580200	3001800	3113700	1.47751	28.3955	4.82759	up
Hmcp001618	C32H38O20	Quercetin-3-O-(2''-O-Xylosyl)rutinoside	Flavonoids	Flavonols	129235-39-8	B	9	9	9	57041	60481	42230	1.48073	5916.74	12.5306	up
Hmqp002870	C32H38O20	Luteolin-7-O-Sophoroside-5-O-arabinoside	Flavonoids	Flavonoid	-	B	1916500	2723300	1748500	172370	138150	73848	1.44919	0.0601675	-4.05487	down
pme2651	C21H28N7O17P3	NADP (Nicotinamide adenine dinucleotide phosphate)	Nucleotides and derivatives	Nucleotides and derivatives	53-59-8	B	287250	435530	553500	432200	676420	831910	0.898345	1.52046	0.604506	insig
Lmyp003857	C35H28O19	Kaempferol-3-O-(2'',6''-digalloyl)glucoside	Flavonoids	Flavonoid	-	B	918740	775950	832610	360120	361510	319440	1.46117	0.41193	-1.27953	down
Lnrp102163	C33H40O20	Quercetin-3-O-rutinoside-7-O-rhamnoside	Flavonoids	Flavonols	-	A	9	4601.2	2548.8	36564	38499	31632	1.08625	14.9036	3.89759	up
pmp001105	C33H40O20	Kaempferol-3-O-neohesperidoside-7-O-glucoside	Flavonoids	Flavonols	-	A	63572	140880	128080	110690	90687	155400	0.231577	1.07291	0.101529	insig
Hmcp001559	C33H40O20	Isorhamnetin-3-O-rutinoside-7-O-arabinoside	Flavonoids	Flavonols	-	B	9	9	9	9	5522.5	6825.6	1.04151	457.67	8.83817	up
HJAP127	C33H40O20	Quercetin-3-O-(2''-O-Rhamnosyl)rutinoside	Flavonoids	Flavonols	55696-57-6	A	183240	127050	213780	18992000	20721000	16026000	1.47929	106.358	6.73278	up
Hmcp001329	C32H38O21	Quercetin-3-O-xylosyl(1→2)glucosyl(1→2)glucoside	Flavonoids	Flavonols	-	A	9	9	9	69218	121410	128180	1.47874	11807.7	13.5274	up
pmn001505	C41H64O13	Oleanolic acid-3-O-xylosyl(1→3)glucuronide	Terpenoids	Triterpene	-	A	56503	149810	121710	44219	33019	40158	1.24989	0.35789	-1.48241	down
Lmyp003588	C35H28O20	Quercetin-3-O-(2'',6''-digalloyl)-glucoside	Flavonoids	Flavonols	-	B	21734	10690	14611	654300	679840	604060	1.47358	41.2076	5.36484	up
HJAP128	C34H42O20	Isorhamnetin-3-O-rutinoside-7-O-rhamnoside	Flavonoids	Flavonoid	-	A	154860	199240	283860	908160	1824600	1472100	1.42548	6.5911	2.72052	up
HJAP023	C33H40O21	Kaempferol-6,8-di-C-glucoside-7-O-glucoside	Flavonoids	Flavonoid	-	B	9	9	9	28264	33360	51881	1.47789	4203.89	12.0375	up
pme2746	C27H33N9O15P2	Riboflavin 5'-Adenosine Diphosphate	Nucleotides and derivatives	Nucleotides and derivatives	146-14-5	A	1775600	1551700	1808600	2267200	2140700	2176100	1.37939	1.28196	0.358347	insig
Hmcp001589	C34H42O21	Isorhamnetin-3-O-rutinoside-4'-O-glucoside	Flavonoids	Flavonols	111393-97-6	B	9	9	9	77359	125950	152080	1.47847	13162.6	13.6842	up
Lmhp003162	C34H42O21	Chrysoeriol-6,8-di-C-glucoside-4'-O-glucoside	Flavonoids	Flavonoid	-	B	9	9	9	17662	41451	64307	1.4728	4571.11	12.1583	up
pmb0676	C38H40O19	Chrysoeriol-8-C-glucoside-7-O-(6''-feruloyl)glucoside	Flavonoids	Flavonoid carbonoside	-	B	363060	271740	246270	143700	93705	109830	1.39261	0.394106	-1.34334	down
Lmhp002374	C39H50O25	Quercetin-3-O-glucosyl(1→4)rhamnoside-7-O-rutinoside	Flavonoids	Flavonols	-	B	9	9	9	141210	67296	64886	1.47859	10125.6	13.3057	up
HJAP123	C40H52O25	Isorhamnetin-3-O-rutinoside-7-O-rutinoside	Flavonoids	Flavonoid	-	A	2820.7	261.7	4422.7	56248	89822	77793	1.3585	29.8281	4.8986	up
