# Supplementary material for: Elucidating the Differentiation Synthesis Mechanisms of Differently Colored Resistance Quinoa Seedings Using Metabolite Profiling and Transcriptome Analysis
Source: Metabolites. 2023 Oct 10;13(10):1065. doi: 10.3390/metabo13101065 (PMC10609267; doi:10.3390/metabo13101065)
Supplement: Supplementary file 1 [file metabolites-13-01065-s001.zip › Table S6.xlsx]

## Sheet: Sheet1
Table S6 All metabolites in R-WvsR-B
Index	Formula	Compounds	Class I	Class II	CAS	Level	R-W1	R-W2	R-W3	R-B1	R-B2	R-B3	VIP	Fold_Change	Log2FC	Type
pme3200	C2H7N3	1-methylguanidine	Nucleotides and derivatives	Nucleotides and derivatives	471-29-4	B	51021	107940	59709	9	9	9	1.4463	0.000123474	-12.9835	down
pmb0782	C5H11N	Piperidine	Alkaloids	Alkaloids	110-89-4	B	5483200	5731700	5319500	6276500	5844700	4164800	0.157859	0.984977	-0.0218384	insig
pme2292	C4H12N2	Putrescine	Alkaloids	Phenolamine	110-60-1	B	48504	96358	91373	56923	83770	15628	0.659496	0.661718	-0.595711	insig
pme1987	C3H7NO2	L-Alanine	Amino acids and derivatives	Amino acids and derivatives	56-41-7	B	2453.9	1461.1	9	4567.6	6709.8	5798.1	0.884399	4.35155	2.12153	insig
ML10198895	C3H7NO2	N-Methylglycine	Amino acids and derivatives	Amino acids and derivatives	107-97-1	B	18272	17112	15463	19070	18423	19727	1.07393	1.12534	0.170357	insig
pme2601	C3H6O3	3-Hydroxypropanoic acid	Organic acids	Organic acids	503-66-2	B	40550	35778	37515	25612	36795	19705	0.991454	0.721274	-0.471381	insig
Lmqp000873	C4H4O3	Succinic anhydride	Organic acids	Organic acids	108-30-5	B	1569800	1878200	1029700	1797700	2679000	1261200	0.545109	1.28144	0.357765	insig
mws4052	C4H7NO2	1-Aminocyclopropane-1-carboxylic acid	Organic acids	Organic acids	22059-21-8	B	513680	509830	503570	458700	523750	583390	0.196589	1.02538	0.0361612	insig
pme1841	C5H14N2	Cadaverine	Alkaloids	Phenolamine	462-94-2	B	16163	12261	13391	14433	17881	14749	0.730632	1.12551	0.170573	insig
pme3011	C4H9NO2	γ-Aminobutyric acid	Organic acids	Organic acids	56-12-2	B	258700	177180	523680	788930	366900	522220	0.916289	1.74877	0.806341	insig
pme3017	C4H9NO2	2-Aminoisobutyric acid	Amino acids and derivatives	Amino acids and derivatives	62-57-7	B	2459900	4501300	3770400	1720400	690670	570290	1.26297	0.277811	-1.84782	down
pme3033	C4H9NO2	N,N-Dimethylglycine	Amino acids and derivatives	Amino acids and derivatives	1118-68-9	B	273810	358230	508180	484060	201680	309490	0.373796	0.87284	-0.19621	insig
pmb0484	C5H13NO	Choline	Alkaloids	Alkaloids	62-49-7	B	20851000	28952000	26763000	16618000	7203200	5506500	1.21117	0.383038	-1.38444	down
ML10172161	C3H4O4	Hydroxypyruvic acid	Organic acids	Organic acids	1113-60-6	B	450760	309490	359050	452180	565910	453150	1.067	1.31443	0.394436	insig
mws0576	C4H8O3	3-Hydroxybutyric acid	Organic acids	Organic acids	300-85-6	B	363730	511230	369670	389400	417870	169680	0.631544	0.784932	-0.34936	insig
mws0574	C4H8O3	2-Hydroxyisobutyric acid	Organic acids	Organic acids	594-61-6	A	2193400	1799900	1954900	1916000	1566700	1494400	0.985124	0.836741	-0.257148	insig
pme1975	C3H4O4	Malonic acid	Organic acids	Organic acids	141-82-2	B	1278300	1122300	1243700	1199300	1828500	1512200	0.919986	1.24578	0.317051	insig
pme0048	C2H7NO2S	2-Aminoethanesulfinic acid	Organic acids	Organic acids	300-84-5	B	2579.2	4147.2	2839.5	639.91	2847.6	2532.5	0.775595	0.62932	-0.668135	insig
mws0255	C4H5N3O	Cytosine	Nucleotides and derivatives	Nucleotides and derivatives	71-30-7	B	2021600	4700000	3757000	645670	2018100	787670	1.16495	0.32938	-1.60218	down
pme0257	C4H4N2O2	Uracil	Nucleotides and derivatives	Nucleotides and derivatives	66-22-8	A	194460	158830	94021	122910	182520	220150	0.420694	1.17498	0.232632	insig
pme0006	C5H9NO2	L-Proline	Amino acids and derivatives	Amino acids and derivatives	147-85-3	B	41086000	39304000	32844000	35151000	37279000	24885000	0.707127	0.859415	-0.218573	insig
mws0376	C4H4O4	Fumaric acid	Organic acids	Organic acids	110-17-8	B	55745	194640	54204	57699	54767	20551	0.82607	0.43671	-1.19525	insig
pme0275	C5H8O3	4-Oxopentanoic Acid	Organic acids	Organic acids	123-76-2	B	12744	16422	13079	10206	10116	5680.1	1.11687	0.615507	-0.700152	insig
mws0823	C5H8O3	3-Methyl-2-Oxobutanoic acid	Organic acids	Organic acids	759-05-7	B	52394	96473	55644	40952	52940	28349	1.0047	0.597723	-0.74245	insig
pme3193	C4H7NO3	N-Acetyl-L-glycine	Amino acids and derivatives	Amino acids and derivatives	543-24-8	B	10101	11138	12680	10666	11882	13389	0.43292	1.05949	0.0833763	insig
pmb1096	C8H7N	Indole	Alkaloids	Plumerane	120-72-9	A	7706.1	13699	7964.3	10583	7906.4	11409	0.10476	1.01801	0.0257545	insig
pme0120	C5H11NO2	5-Aminovaleric acid	Amino acids and derivatives	Amino acids and derivatives	660-88-8	B	15355	10727	21564	15169	12651	15346	0.184469	0.905973	-0.14246	insig
mws0256	C5H11NO2	L-Valine	Amino acids and derivatives	Amino acids and derivatives	72-18-4	B	10885000	11259000	8864000	9058400	8674700	6176100	0.994042	0.771066	-0.375075	insig
mws0191	C5H11NO2	Betaine	Alkaloids	Alkaloids	107-43-7	A	550390	637050	580780	593450	694630	554420	0.344243	1.04201	0.0593668	insig
pme1730	C4H6O4	D-Erythronolactone	Organic acids	Organic acids	15667-21-7	B	967580	687280	592580	511290	828240	562560	0.538619	0.846336	-0.240697	insig
mws0470	C4H6O4	Methylmalonic acid*	Organic acids	Organic acids	516-05-2	A	4568000	5707200	3391100	5381600	8348400	3406800	0.422813	1.25395	0.326475	insig
mws0192	C4H6O4	Succinic acid*	Organic acids	Organic acids	110-15-6	A	4880100	5825000	3277100	5487400	8338500	3443700	0.3957	1.23511	0.304643	insig
mws0147	C5H10O3	β-Hydroxyisovaleric acid	Organic acids	Organic acids	625-08-1	B	319050	753490	524140	463520	508910	224180	0.539035	0.749436	-0.416122	insig
pme3096	C3H5NO4	Aminomalonic acid	Organic acids	Organic acids	1068-84-4	B	4146300	5054000	2957600	4978400	7564400	3194900	0.508547	1.29444	0.372331	insig
mws0230	C4H9NO3	L-Threonine	Amino acids and derivatives	Amino acids and derivatives	72-19-5	B	1531000	1494400	1339600	1417100	1574500	1511300	0.414255	1.03159	0.0448728	insig
pmp001287	C8H9N	N-Benzylmethylene isomethylamine	Alkaloids	Alkaloids	-	A	8136600	7963800	6429500	15466000	9063900	6695400	0.676583	1.38595	0.470875	insig
pma0134	C4H8O4	D-(-)-Threose	Others	Saccharides and Alcohols	95-43-2	B	97315	213870	142120	137290	153030	126410	0.126012	0.919315	-0.121369	insig
pme0195	C3H7NO2S	L-Cysteine	Amino acids and derivatives	Amino acids and derivatives	52-90-4	B	9447.8	8132.6	4347.5	7461.2	5257.5	18125	0.371135	1.4066	0.492208	insig
pmb0069	C7H7NO	Benzamide	Phenolic acids	Phenolic acids	55-21-0	B	45586000	93791000	74501000	40880000	91435000	31708000	0.563827	0.7669	-0.38289	insig
mws0491	C8H11N	Phenethylamine	Alkaloids	Alkaloids	64-04-0	A	14804000	41514000	29508000	12793000	37451000	9893000	0.577221	0.700685	-0.513162	insig
pme0241	C7H6O2	Benzoic acid	Phenolic acids	Phenolic acids	65-85-0	B	31569	18646	18529	16645	19150	24010	0.40216	0.869967	-0.200968	insig
Lmbn001930	C7H6O2	2-Hydroxybenzaldehyde (Salicylaldehyde)	Phenolic acids	Phenolic acids	90-02-8	B	35318	47550	41917	24293	32505	12698	1.06868	0.556926	-0.844443	insig
mws0628	C7H6O2	4-Hydroxybenzaldehyde	Phenolic acids	Phenolic acids	123-08-0	B	357620	481620	308800	222470	182850	305230	1.14334	0.618924	-0.692165	insig
mws0133	C6H6N2O	Nicotinamide	Others	Vitamin	98-92-0	A	2706700	2643100	2463000	2631100	3179500	3079400	1.00348	1.13788	0.186344	insig
ML10179289	C8H10O	2-Phenylethanol	Phenolic acids	Phenolic acids	60-12-8	B	29372000	71299000	52099000	25377000	68203000	19300000	0.5608	0.738889	-0.436571	insig
pme1216	C6H5NO2	2-Picolinic acid	Organic acids	Organic acids	98-98-6	B	110440	190210	273540	169110	154960	260340	0.132635	1.0178	0.0254527	insig
Lmbp000668	C6H5NO2	Isonicotinic acid	Organic acids	Organic acids	55-22-1	B	230270	452370	595210	293000	266880	550830	0.245769	0.869202	-0.202236	insig
pme0490	C6H5NO2	Nicotinic acid (Vitamin B3)	Others	Vitamin	59-67-6	B	223470	442580	603040	284750	265870	508740	0.293175	0.83474	-0.260601	insig
mws0566	C7H8O2	4-Methylcatechol	Phenolic acids	Phenolic acids	452-86-8	B	1091.9	353.63	359.07	2070.2	359.07	720.93	0.483452	1.74565	0.803764	insig
pmb0302	C2H8NO3P	2-Aminoethylphosphonate	Lipids	Glycerol ester	2041-14-7	B	29612	14802	20238	13254	30403	43905	0.396116	1.35436	0.43761	insig
pmp001086	C6H6O3	5-Hydroxymethylfurfural	Phenolic acids	Phenolic acids	67-47-0	B	91684	55772	61483	41457	51088	92852	0.389634	0.887326	-0.172464	insig
NK10264324	C6H6O3	1,3,5-Benzenetriol	Phenolic acids	Phenolic acids	108-73-6	B	43819	18968	34375	27934	18439	9	0.683682	0.477368	-1.06683	insig
pmp000509	C6H6O3	Maltol	Others	Others	118-71-8	B	196710	243050	274520	58213	67571	55135	1.42387	0.253289	-1.98115	down
mws0251	C5H6N2O2	Thymine	Nucleotides and derivatives	Nucleotides and derivatives	65-71-4	B	16463	18658	15915	14559	21995	13386	0.188066	0.978525	-0.0313194	insig
Lmbn000612	C5H7NO3	1-Pyrroline-4-hydroxy-2-carboxylic acid	Organic acids	Organic acids	9054-77-7	B	2756.3	2473.7	3909.6	6615.4	4188.7	1366.8	0.195121	1.33167	0.413233	insig
mws0263	C5H7NO3	5-Oxo-L-Proline	Amino acids and derivatives	Amino acids and derivatives	98-79-3	A	2509.7	4978.6	9147.4	8057.4	13998	3049.6	0.458249	1.5091	0.593692	insig
ML10181668	C6H11NO2	Cycloleucine*	Amino acids and derivatives	Amino acids and derivatives	52-52-8	B	19142000	17673000	22849000	19119000	23398000	8888700	0.469606	0.861587	-0.214932	insig
Rfmb319	C6H11NO2	Pipecolic acid*	Amino acids and derivatives	Amino acids and derivatives	4043-87-2	B	6226800	5548100	7064000	5489900	7634500	2130200	0.549354	0.809739	-0.30447	insig
mws0425	C5H6O4	Citraconic acid	Organic acids	Organic acids	498-23-7	B	38235	44718	24979	34833	35013	40879	0.167785	1.02588	0.0368583	insig
Zmpn000638	C4H9N3O2	3-Guanidinopropionic acid	Organic acids	Organic acids	353-09-3	B	24018	25400	35769	25258	29530	28043	0.0516332	0.972343	-0.0404625	insig
pmp001198	C6H13NO2	6-Deoxyfagomine	Alkaloids	Alkaloids	197449-09-5	A	7063200	7673900	6800100	7977700	7458800	5366000	0.260515	0.965887	-0.0500738	insig
pme0274	C6H13NO2	6-Aminocaproic acid	Organic acids	Organic acids	60-32-2	B	623940	535450	457920	796780	687860	456410	0.581223	1.20017	0.263241	insig
mws0227	C6H13NO2	L-Leucine*	Amino acids and derivatives	Amino acids and derivatives	61-90-5	A	1473800	1504700	1294900	1623500	1569500	1067900	0.084725	0.997075	-0.00422617	insig
mws0258	C6H13NO2	L-Isoleucine*	Amino acids and derivatives	Amino acids and derivatives	73-32-5	A	1444100	1572700	1367700	1584500	1480800	1023700	0.413113	0.932603	-0.100664	insig
pme3034	C5H8O4	Ethylmalonic acid	Organic acids	Organic acids	601-75-2	B	14687	31307	12320	9496	13787	12086	0.848867	0.606527	-0.721357	insig
pme0243	C5H8O4	Glutaric acid	Organic acids	Organic acids	110-94-1	B	407000	763800	429250	298340	374230	246360	1.08965	0.574313	-0.80009	insig
Lmmn000806	C5H8O4	Dimethylmalonic acid*	Organic acids	Organic acids	595-46-0	A	78772	191830	115240	69350	110410	16411	0.819768	0.508423	-0.975898	insig
Lmbn001364	C5H8O4	4-Hydroxy-2-Oxopentanoic Acid*	Organic acids	Organic acids	3318-73-8	B	79721	187120	116750	62776	102740	18490	0.889708	0.479693	-1.05982	insig
Lmbn001288	C5H8O4	2-Hydroxy-2-methyl-3-oxobutanoic acid*	Organic acids	Organic acids	71698-08-3	B	81397	176890	127320	69738	97812	18544	0.897543	0.4826	-1.0511	insig
mws0473	C5H8O4	2-Methylsuccinic acid*	Organic acids	Organic acids	498-21-5	A	952970	2243900	1365600	806890	1251000	225130	0.85812	0.500391	-0.998872	insig
Lmgn000160	C4H8N2O3	3-Ureidopropionic Acid	Organic acids	Organic acids	462-88-4	B	21395	23378	24393	19577	24965	13674	0.68876	0.841685	-0.248647	insig
Lmrn002746	C6H12O3	2-Hydroxy-4-methylpentanoic acid	Organic acids	Organic acids	498-36-2	A	29228	39550	38748	46798	28340	47394	0.385094	1.13956	0.188473	insig
mws0341	C6H12O3	2-Hydroxyisocaproic acid	Organic acids	Organic acids	20312-37-2	A	9374.7	22492	56338	16932	62307	12784	0.0660048	1.04329	0.061139	insig
mws0972	C6H12O3	6-Hydroxyhexanoic acid	Organic acids	Organic acids	1191-25-9	A	387080	354670	678690	439130	602040	297130	0.106934	0.942173	-0.0859363	insig
pme2527	C5H12N2O2	L-Ornithine	Amino acids and derivatives	Amino acids and derivatives	70-26-8	B	27232	38732	45651	32831	31772	19661	0.757722	0.754952	-0.405543	insig
mws0219	C4H7NO4	L-Aspartic Acid	Amino acids and derivatives	Amino acids and derivatives	56-84-8	A	15376000	17976000	14348000	15094000	17133000	13398000	0.334385	0.956499	-0.0641647	insig
mws0275	C4H6O5	L-Malic acid*	Organic acids	Organic acids	97-67-6	A	24547000	54476000	17363000	32267000	35125000	46574000	0.484224	1.18239	0.241708	insig
Lmbn000198	C4H6O5	3-Dehydro-L-Threonic Acid*	Organic acids	Organic acids	-	A	8059700	16166000	6797100	10249000	10635000	14034000	0.407975	1.12556	0.170642	insig
pmb0374	C5H5N5	2-Aminopurine	Nucleotides and derivatives	Nucleotides and derivatives	452-06-2	A	94635	432720	308470	145340	141020	94307	0.792666	0.455439	-1.13467	insig
pme0040	C5H5N5	Adenine	Nucleotides and derivatives	Nucleotides and derivatives	73-24-5	A	10931000	31275000	37704000	8318200	9646500	5941000	1.15349	0.299158	-1.74102	down
HJKP000649	C8H9NO	N-benzylformamide	Alkaloids	Alkaloids	6343-54-0	B	2164800	2371200	1572100	1931300	1545400	1137600	0.86113	0.755439	-0.404612	insig
mws0889	C4H8O5	D-Threonic Acid	Others	Saccharides and Alcohols	3909-12-4	A	2490400	1823300	1681200	1246400	1635300	1250400	1.11457	0.689269	-0.536861	insig
pme0033	C5H4N4O	Hypoxanthine	Nucleotides and derivatives	Nucleotides and derivatives	68-94-0	B	33019	10016	6448.1	380170	375290	458260	1.38886	24.528	4.61636	up
Zmyn002919	C8H8O2	2-Methylbenzoic acid	Phenolic acids	Phenolic acids	118-90-1	B	4702.1	4758.7	3420.3	1425.7	2914.9	2585.5	1.16276	0.537695	-0.895141	insig
mws1336	C7H7NO2	4-Aminobenzoic acid	Phenolic acids	Phenolic acids	150-13-0	B	2011800	1506300	1228300	1112500	1213600	1130000	1.03917	0.728152	-0.457689	insig
mws1078	C7H7NO2	Anthranilic Acid	Phenolic acids	Phenolic acids	118-92-3	B	303700	558820	416750	299230	438300	525690	0.0447788	0.987454	-0.0182149	insig
pme2268	C7H7NO2	Trigonelline	Alkaloids	Alkaloids	535-83-1	A	28579000	22194000	24107000	28469000	19989000	31950000	0.247852	1.07382	0.102759	insig
mws0146	C7H7NO2	Nicotinic Acid Methyl Ester(Methyl Nicotinate)	Alkaloids	Alkaloids	93-60-7	B	103530	30266	42557	158260	64699	126960	0.928643	1.9842	0.988555	insig
pme1002	C8H11NO	L-Tyramine	Amino acids and derivatives	Amino acids and derivatives	51-67-2	A	3717500	8199700	5686900	4767400	5616600	4479800	0.373061	0.844337	-0.244108	insig
pma0948	C8H11NO	Phenylethanolamine	Alkaloids	Alkaloids	7568-93-6	B	1391400	3071900	2197000	1808300	2094400	1612600	0.421486	0.828086	-0.272148	insig
Hmgn001653	C7H6O3	Protocatechualdehyde*	Phenolic acids	Phenolic acids	139-85-5	B	1115500	4404100	1593600	220500	340290	184220	1.33767	0.104736	-3.25517	down
Lmgn001670	C7H6O3	Salicylic acid	Phenolic acids	Phenolic acids	69-72-7	A	37946	37484	37919	61819	44732	69643	1.21807	1.55444	0.636393	insig
mws0749	C7H6O3	4-Hydroxybenzoic acid	Phenolic acids	Phenolic acids	99-96-7	B	1048900	4082100	1417300	188580	369970	234240	1.32069	0.121068	-3.04611	down
Lmbn002862	C7H6O3	3-Hydroxybenzoic Acid	Organic acids	Organic acids	99-06-9	B	688710	3478600	3074600	1657000	2241800	1761400	0.057182	0.781589	-0.355517	insig
Lmbn001981	C7H6O3	2,5-Dihydroxybenzaldehyde*	Phenolic acids	Phenolic acids	1194-98-5	B	1085400	4246800	1480900	132760	313460	210040	1.33493	0.0963233	-3.37597	down
pme1137	C6H5NO3	6-Hydroxynicotinic acid	Alkaloids	Alkaloids	5006-66-6	B	32087	54367	27310	17810	33155	25654	0.842002	0.673491	-0.57027	insig
pme2828	C6H5NO3	4-Nitrophenol	Phenolic acids	Phenolic acids	100-02-7	B	18902000	19274000	18145000	17678000	18111000	17510000	1.17243	0.946343	-0.0795645	insig
mws0704	C2H8NO4P	O-Phosphorylethanolamine	Alkaloids	Alkaloids	1071-23-4	B	32519	18508	27283	39262	27512	64017	0.908525	1.67017	0.739995	insig
pma2987	C6H11N3O	Histidinol	Alkaloids	Alkaloids	501-28-0	B	6598100	6682000	6306000	6040400	5627000	5959100	1.29301	0.899949	-0.152084	insig
pme3207	C6H6O4	Muconic acid	Organic acids	Organic acids	1119-72-8	A	2251700	2052000	1944700	2117200	2168200	3469500	0.702758	1.2411	0.311621	insig
pmb0764	C6H9NOS	4-Methyl-5-thiazoleethanol	Others	Others	137-00-8	B	4630	4715.5	6700.1	7887.7	11522	8794	1.26456	1.75772	0.813707	insig
Rfmb320	C7H13NO2	1-Methylpiperidine-2-carboxylic acid	Amino acids and derivatives	Amino acids and derivatives	7730-87-2	B	319840	317630	307360	288710	307210	334340	0.294499	0.984579	-0.0224208	insig
mws0103	C9H7NO	Indole-3-carboxaldehyde	Alkaloids	Plumerane	487-89-8	B	56173	61720	57826	70120	61536	90863	0.977255	1.26633	0.340658	insig
pme0295	C6H11NO3	4-Acetamidobutyric acid	Organic acids	Organic acids	3025-96-5	B	19273	21638	29727	26552	12188	32969	0.118105	1.01516	0.0217097	insig
mws0567	C5H11N3O2	4-Guanidinobutyric acid	Organic acids	Organic acids	463-00-3	B	165400	208370	167050	148000	114680	102260	1.21143	0.67479	-0.567489	insig
pme2380	C5H6O5	α-Ketoglutaric acid	Organic acids	Organic acids	328-50-7	B	104720	236930	191500	171420	167530	174780	0.0411748	0.963575	-0.0535312	insig
mws0208	C6H10O4	Adipic Acid*	Organic acids	Organic acids	124-04-9	B	1136800	1605000	827540	370050	437150	225650	1.32602	0.289367	-1.78903	down
Wmzn000227	C6H10O4	2,2-Dimethylsuccinic acid	Organic acids	Organic acids	597-43-3	A	51027	60352	67849	110380	124800	35099	0.483985	1.50802	0.592653	insig
Lmbn001609	C6H10O4	2-Acetyl-2-Hydroxybutanoic Acid	Organic acids	Organic acids	-	B	165610	226710	121710	59371	61833	33491	1.32628	0.300945	-1.73243	down
mws0924	C6H10O4	2-Methylglutaric acid*	Organic acids	Organic acids	617-62-9	B	985410	1429400	701710	353640	444390	220110	1.28728	0.326691	-1.614	down
Lmbn001676	C6H10O4	3-Hydroxy-3-Methyl-2-Oxopentanoic Acid	Organic acids	Organic acids	-	B	5961.9	19649	11099	5296.5	12467	2836.7	0.729505	0.561162	-0.833511	insig
pme0193	C5H10N2O3	L-Glutamine	Amino acids and derivatives	Amino acids and derivatives	56-85-9	A	2407100	2695400	3150800	2056200	2079700	1605400	1.2095	0.695637	-0.523594	insig
pme0026	C6H14N2O2	L-Lysine	Amino acids and derivatives	Amino acids and derivatives	56-87-1	B	2580200	2803400	3217200	2147900	2023400	1642600	1.26915	0.675972	-0.564965	insig
pme1691	C7H16NO2	Acetylcholine	Alkaloids	Alkaloids	60-31-1	B	73735	83970	56252	45628	50168	79075	0.703615	0.817318	-0.29103	insig
mws1050	C5H9NO4	O-Acetylserine	Amino acids and derivatives	Amino acids and derivatives	5147-00-2	B	719300	912800	955580	808600	1328500	688330	0.199049	1.09188	0.126811	insig
pme0014	C5H9NO4	L-Glutamic acid	Amino acids and derivatives	Amino acids and derivatives	56-86-0	A	70392000	69681000	72733000	67966000	64620000	71559000	0.798851	0.959301	-0.0599446	insig
pmp001285	C8H4O3	Phthalic anhydride	Phenolic acids	Phenolic acids	85-44-9	A	1027400	766580	776860	624920	837860	1818900	0.300426	1.2765	0.352195	insig
pmb2826	C5H8O5	L-Citramalic acid	Organic acids	Organic acids	6236-09-5	A	623900	943610	369580	352060	499920	457670	0.742058	0.676091	-0.56471	insig
Lmbn000216	C5H8O5	3-Methylmalic acid	Organic acids	Organic acids	152204-30-3	A	15637	21194	29410	10830	12140	20720	0.89493	0.659561	-0.600421	insig
ML10171848	C5H8O5	D-Arabinono-1,4-lactone	Others	Saccharides and Alcohols	2782-09-4	A	74122	160810	92312	65732	85105	68175	0.86382	0.669262	-0.579357	insig
mws2213	C9H8O2	Cinnamic acid	Phenolic acids	Phenolic acids	140-10-3	A	5057.4	8270.1	18485	61754	50312	53884	1.33742	5.2165	2.38308	up
pme3154	C6H12O4	Mevalonic acid	Organic acids	Organic acids	150-97-0	B	221800	280300	478620	410840	528230	375880	0.830569	1.3408	0.423095	insig
Lmgp000796	C8H7NO2	4-Hydroxymandelonitrile	Alkaloids	Alkaloids	13093-65-7	A	5968900	5969900	6876900	6722300	5312700	5762600	0.464877	0.945891	-0.0802543	insig
pme1210	C5H11NO2S	L-Methionine	Amino acids and derivatives	Amino acids and derivatives	63-68-3	A	5695400	5806100	6643200	6731700	5582400	5604500	0.112533	0.987539	-0.0180903	insig
mws0847	C6H7N5	1-Methyladenine	Nucleotides and derivatives	Nucleotides and derivatives	5142-22-3	B	106990	120720	87591	116120	70184	104310	0.3994	0.921703	-0.117626	insig
mws0262	C4H6O6	L-Tartaric acid	Organic acids	Organic acids	87-69-4	B	959090	1344800	810980	591850	615530	830700	1.1075	0.654307	-0.611961	insig
Zmgn000173	C5H10O5	D-Ribose	Others	Saccharides and Alcohols	50-69-1	B	222420	198140	177920	127260	231380	123680	0.731159	0.805908	-0.311312	insig
mws1499	C5H10O5	D-Arabinose	Others	Saccharides and Alcohols	10323-20-3	B	270860	433860	284530	210680	310990	363030	0.38534	0.894314	-0.161147	insig
Lmxp001668	C9H10O2	2-Methoxy-4-ethenylphenol	Phenolic acids	Phenolic acids	7786-61-0	A	145100	109600	25633	1559300	1040100	2178400	1.34049	17.0433	4.09113	up
pme0183	C5H5N5O	Isoguanine	Nucleotides and derivatives	Nucleotides and derivatives	3373-53-3	B	143840	205570	239360	170510	151340	130430	0.843839	0.768178	-0.380488	insig
pme1109	C5H5N5O	Guanine	Nucleotides and derivatives	Nucleotides and derivatives	73-40-5	A	301260	986570	1152000	82685	141760	124000	1.29431	0.142815	-2.80778	down
pme0256	C5H4N4O2	Xanthine	Nucleotides and derivatives	Nucleotides and derivatives	69-89-6	A	44882	26362	26123	49268	50691	25160	0.560367	1.28502	0.361796	insig
mws0182	C8H8O3	p-Hydroxyphenyl acetic acid	Phenolic acids	Phenolic acids	156-38-7	B	7022.1	5936.8	9	7325.5	9	4815.5	0.043685	0.936929	-0.0939886	insig
pme2362	C8H8O3	Mandelic acid	Phenolic acids	Phenolic acids	90-64-2	B	44417	33312	28606	48027	29240	57140	0.571597	1.264	0.337992	insig
mws0458	C8H8O3	Vanillin	Phenolic acids	Phenolic acids	121-33-5	B	16679	44362	45089	233680	178480	333470	1.35115	7.02563	2.81263	up
pme0513	C5H12O5	Xylitol	Others	Saccharides and Alcohols	87-99-0	A	18177	35727	13689	11706	4493.4	29442	0.65121	0.675239	-0.566531	insig
mws0437	C5H12O5	D-Arabitol	Others	Saccharides and Alcohols	488-82-4	A	65064	77357	64719	28741	34163	59449	1.14856	0.590678	-0.759557	insig
mws0444	C7H7NO3	3-Aminosalicylic acid	Phenolic acids	Phenolic acids	570-23-0	B	6682.7	15161	19069	8740.6	9183.8	2859	0.828292	0.507994	-0.977117	insig
mws0596	C7H7NO3	3-Hydroxyanthranilic acid	Organic acids	Organic acids	548-93-6	B	22919	22073	8451.5	39607	24672	54170	1.02566	2.21634	1.14818	up
mws0183	C7H6O4	3,4-Dihydroxybenzoic acid (Protocatechuic acid)*	Phenolic acids	Phenolic acids	99-50-3	A	21305	28042	15342	51528	45674	206390	1.12453	4.6931	2.23054	up
mws0885	C7H6O4	2,4-Dihydroxybenzoic acid	Phenolic acids	Phenolic acids	89-86-1	A	175110	387950	671290	344680	322170	236750	0.303874	0.732045	-0.449995	insig
mws0180	C7H6O4	2,5-Dihydroxybenzoic acid; Gentisic Acid*	Phenolic acids	Phenolic acids	490-79-9	A	25741	30532	13132	22252	41674	126490	0.81708	2.74355	1.45604	insig
mws0639	C7H6O4	2,3-Dihydroxybenzoic Acid*	Organic acids	Organic acids	303-38-8	A	340530	700240	1008800	597970	530120	328990	0.49877	0.71092	-0.492241	insig
mws0254	C6H9N3O2	L-Histidine	Amino acids and derivatives	Amino acids and derivatives	71-00-1	B	674820	835030	1263700	875840	1085400	439490	0.351045	0.86558	-0.208261	insig
pmb0819	C10H8N2	3-Indoleacetonitrile	Alkaloids	Plumerane	771-51-7	B	21910	31383	21476	31073	26455	21278	0.228643	1.05399	0.0758652	insig
Lmbn001467	C7H13NO3	5-Acetamidopentanoic Acid	Organic acids	Organic acids	1072-10-2	B	45374	49509	48582	64434	68244	46779	0.966205	1.25088	0.322939	insig
mws0987	C10H8O2	6-MethylCoumarin	Lignans and Coumarins	Coumarins	92-48-8	B	11021	5031.8	6878.9	6754.9	8426.4	6045.7	0.0772005	0.925662	-0.111443	insig
Zmjn001813	C7H12O4	Pimelic acid*	Organic acids	Organic acids	111-16-0	B	20967	31784	19466	74203	52969	146100	1.26282	3.78404	1.91993	up
Lmbn002072	C7H12O4	2-Propylsuccinic acid*	Organic acids	Organic acids	618-57-5	B	29773	38582	16813	65073	32484	106470	0.981124	2.39558	1.26038	insig
pme0128	C6H12N2O3	L-Alanyl-L-Alanine	Amino acids and derivatives	Amino acids and derivatives	1948-31-8	B	7475	11465	16295	27882	25953	30985	1.29766	2.40727	1.2674	up
mws0005	C10H12N2	Tryptamine	Alkaloids	Plumerane	61-54-1	A	9835200	23290000	13673000	622890	1305300	769120	1.41048	0.057637	-4.11686	down
mws1417	C9H7NO2	Indole-3-carboxylic acid	Alkaloids	Plumerane	771-50-6	B	21701	31463	27161	27348	20283	30412	0.164837	0.97159	-0.0415798	insig
pme3382	C6H11NO4	N-Acetyl-L-threonine	Amino acids and derivatives	Amino acids and derivatives	17093-74-2	A	93108	126200	126540	99672	88415	82584	1.03668	0.78263	-0.353598	insig
mws1346	C6H11NO4	DL-2-Aminoadipic acid	Alkaloids	Alkaloids	542-32-5	B	104420	157410	131620	160930	160280	126610	0.62211	1.13819	0.186739	insig
pme2761	C5H6O6	4-Hydroxy-2-oxoglutaric acid	Organic acids	Organic acids	1187-99-1	B	68647	55009	47540	32204	53491	39948	0.953764	0.733913	-0.446319	insig
pme2914	C6H10O5	3-Hydroxy-3-methylpentane-1,5-dioic acid	Amino acids and derivatives	Amino acids and derivatives	503-49-1	A	123320	222950	248980	345320	137300	252910	0.367435	1.23567	0.305288	insig
pmf0440	C10H10O2	4-MethoxycinnaMaldehyde	Phenolic acids	Phenolic acids	1963-36-6	B	225730	180870	178010	160300	207180	125640	0.696564	0.843503	-0.245536	insig
pme2758	C5H9NO5	4-Hydroxy-L-glutamic acid	Amino acids and derivatives	Amino acids and derivatives	3913-68-6	A	40438	60205	68309	22223	47700	21110	1.05362	0.53881	-0.892152	insig
Lmbp000123	C6H13NO2S	L-Homomethionine	Amino acids and derivatives	Amino acids and derivatives	25148-30-5	B	87365	155730	295490	20514	77809	78354	1.02675	0.328039	-1.60806	down
pme1419	C6H13NO2S	L-Methionine methyl ester	Amino acids and derivatives	Amino acids and derivatives	10332-17-9	A	158720	102870	94555	125260	118730	86096	0.216137	0.92683	-0.109623	insig
mws1641	C6H4N4O2	Lumazine	Nucleotides and derivatives	Nucleotides and derivatives	487-21-8	B	7829.4	21193	12578	13620	10108	8285.6	0.445775	0.76955	-0.377912	insig
pme1439	C9H8O3	p-Coumaric acid	Phenolic acids	Phenolic acids	501-98-4	A	5277700	3980600	2601600	1998500	2063900	1948300	1.22418	0.506809	-0.980487	insig
pmb0142	C9H8O3	Caffeic aldehyde	Phenolic acids	Phenolic acids	141632-15-7	B	117210	101910	122920	123340	93643	187400	0.417383	1.18227	0.241557	insig
mws0159	C9H8O3	Phenylpyruvic acid	Organic acids	Organic acids	156-06-9	B	302470	169580	145420	118230	160700	136140	0.857057	0.672211	-0.573014	insig
pme2529	C6H12O5	1,5-Anhydro-D-glucitol	Others	Saccharides and Alcohols	154-58-5	B	77177	93225	88635	85192	61597	38728	0.90244	0.71618	-0.481607	insig
pme3083	C8H7NO3	2-(Formylamino)benzoic acid	Phenolic acids	Phenolic acids	3342-77-6	B	191890	435020	466040	121410	86340	96656	1.29679	0.278518	-1.84416	down
pme0021	C9H11NO2	L-Phenylalanine	Amino acids and derivatives	Amino acids and derivatives	63-91-2	A	17523000	16051000	13275000	31011000	19097000	13084000	0.610666	1.34884	0.431724	insig
pmb0037	C10H15NO	Hordenine	Alkaloids	Alkaloids	539-15-1	B	534380	176930	210840	1304600	887330	1576100	1.28946	4.08614	2.03074	up
pme0281	C8H6O4	Terephthalic acid	Phenolic acids	Phenolic acids	100-21-0	A	634870	908490	618890	338810	429710	117260	1.1104	0.409657	-1.28751	down
pme0282	C8H6O4	Phthalic acid	Organic acids	Organic acids	88-99-3	A	105360	178620	114000	69464	80714	49210	1.22091	0.501	-0.997117	insig
pmc0274	C6H6N4S	6-Methylmercaptopurine	Nucleotides and derivatives	Nucleotides and derivatives	50-66-8	B	19103000	18300000	14396000	34059000	20445000	14555000	0.588401	1.33321	0.414905	insig
mws0344	C5H10O6	D-Xylonic acid	Organic acids	Organic acids	526-91-0	A	4037500	5216700	4517500	1212000	2501800	944840	1.27977	0.338276	-1.56373	down
pme3381	C9H10O3	3-Hydroxyphenylacetic Acid Methyl Ester	Phenolic acids	Phenolic acids	42058-59-3	B	1132	1289.4	2851.5	5228.9	4257.1	11126	1.24092	3.90904	1.96682	up
mws0467	C9H10O3	3-(4-Hydroxyphenyl)-propionic acid	Phenolic acids	Phenolic acids	501-97-3	B	93949	85992	90658	69317	56267	66080	1.34871	0.708295	-0.497577	insig
pmn001681	C10H14O2	1-(4-Methoxyphenyl)-1-propanol	Phenolic acids	Phenolic acids	5349-60-0	B	15440	10682	10088	8672.1	5340.1	7864.5	1.14373	0.604162	-0.726993	insig
NK10253223	C8H9NO3	2-Amino-3-methoxybenzoic acid	Phenolic acids	Phenolic acids	3177-80-8	B	231680	230530	226930	90668	132970	80014	1.3541	0.440625	-1.18238	down
Zmjp000624	C8H9NO3	Pyridoxal	Others	Vitamin	66-72-8	A	226490	240270	229040	116980	151530	79029	1.27472	0.499481	-1.0015	down
Hmtp000776	C8H9NO3	4,5,6-Trihydroxy-2-cyclohexen-1-ylideneacetonitrile	Alkaloids	Alkaloids	-	B	328320	312740	232740	624710	352630	247380	0.617661	1.4016	0.487077	insig
mws2125	C3H5O6P	Phosphoenolpyruvate	Organic acids	Organic acids	138-08-9	B	133130	84420	169280	396070	129600	835570	0.961563	3.51896	1.81515	insig
mws0028	C8H8O4	Vanillic acid	Phenolic acids	Phenolic acids	121-34-6	B	47760	393660	83122	10887	26231	18950	1.18627	0.106889	-3.22581	down
Hmbp001276	C8H8O4	Gallacetophenone	Phenolic acids	Phenolic acids	528-21-2	B	125800	132080	97885	12513	27598	11335	1.38563	0.144607	-2.78979	down
pme1292	C8H8O4	Homogentisic acid	Phenolic acids	Phenolic acids	451-13-8	B	49767	82236	43221	53305	49554	62318	0.121873	0.942662	-0.0851876	insig
pme2598	C8H8O4	3,4-Dihydroxybenzeneacetic acid	Phenolic acids	Phenolic acids	102-32-9	B	11075	69229	60900	44769	19517	22611	0.320157	0.6154	-0.700403	insig
pme1383	C8H11NO3	Pyridoxine	Others	Vitamin	65-23-6	A	1059400	1100200	1128600	738930	401200	780400	1.17321	0.584067	-0.775794	insig
pme0181	C7H11N3O2	3-Methyl-L-Histidine	Amino acids and derivatives	Amino acids and derivatives	368-16-1	B	25102	38386	35989	27129	25181	31087	0.72104	0.838355	-0.254368	insig
Zmzn000078	C3H7O6P	Dihydroxyacetone phosphate	Others	Saccharides and Alcohols	57-04-5	B	46101	133580	70995	145540	100610	123160	0.827261	1.47326	0.559008	insig
pme3186	C3H7O6P	DL-Glyceraldehyde-3-phosphate	Organic acids	Organic acids	591-59-3	B	17899	41277	25667	49927	37988	80904	1.03358	1.98978	0.99261	insig
mws0024	C7H6O5	Gallic acid	Tannins	Tannin	149-91-7	B	41987	62184	54515	52532	42459	55358	0.261636	0.947462	-0.0778596	insig
Lmbn003524	C9H16O3	9-Oxononanoic acid	Organic acids	Organic acids	2553-17-5	B	10359	10099	9091.7	9501.6	14774	9500.5	0.510495	1.14303	0.192859	insig
pme0253	C8H15NO3	N-Acetyl-L-leucine	Amino acids and derivatives	Amino acids and derivatives	1188-21-2	A	53358	61417	76182	70188	51207	54120	0.39541	0.919134	-0.121653	insig
MA10039492	C6H6O6	Dehydroascorbic acid	Others	Vitamin	490-83-5	A	931190	986890	1366300	966370	1189100	790590	0.412937	0.896991	-0.156834	insig
pme3009	C6H6O6	Trans-Citridic acid	Organic acids	Organic acids	4023-65-8	B	480060	552930	532290	427390	495070	509500	0.801495	0.914827	-0.12843	insig
Lmgn002555	C8H14O4	2-Propylglutaric acid	Organic acids	Organic acids	32806-62-5	A	96264	154260	128020	199800	51609	150540	0.130535	1.06183	0.0865515	insig
mws0242	C8H14O4	Suberic Acid	Organic acids	Organic acids	505-48-6	B	151460	162920	75910	44867	34302	31638	1.33606	0.283909	-1.8165	down
Zmyn000155	C7H14N2O3	N-α-Acetyl-L-ornithine	Amino acids and derivatives	Amino acids and derivatives	6205-08-9	B	41392	33064	54599	60245	54566	23535	0.0553848	1.07199	0.100295	insig
mws0260	C6H14N4O2	L-Arginine	Amino acids and derivatives	Amino acids and derivatives	74-79-3	A	63161	86839	164960	221870	157380	52672	0.345481	1.37136	0.455602	insig
pme2559	C6H9NO5	N-Acetyl-L-Aspartic Acid	Amino acids and derivatives	Amino acids and derivatives	997-55-7	A	34519	56545	38458	27093	30974	12659	1.03558	0.546054	-0.872885	insig
pme1651	C10H9NO2	Indole 3-acetic acid (IAA)	Alkaloids	Plumerane	87-51-4	B	31741	35885	19126	18744	15868	8937	1.11137	0.501994	-0.994257	insig
mws4175	C6H8O6	D-Glucurono-6,3-lactone	Others	Saccharides and Alcohols	32449-92-6	B	2845800	2039300	2148100	1925400	2644200	2078100	0.260701	0.945189	-0.081326	insig
Hmfn000531	C6H8O6	L-Ascorbic acid (Vitamin C)	Others	Vitamin	50-81-7	A	2600100	4671800	4732100	3706000	5240000	4007600	0.322587	1.07911	0.109838	insig
pmb3101	C7H12O5	2-Isopropylmalic Acid	Organic acids	Organic acids	49601-06-1	A	741180	834010	528290	985960	1529900	551220	0.628269	1.4581	0.544088	insig
Zmgn001448	C7H12O5	2-Propylmalic Acid*	Organic acids	Organic acids	-	A	731850	881250	541930	1116300	1757400	662030	0.82648	1.64069	0.7143	insig
Lmbn001754	C7H12O5	3-Isopropylmalic Acid*	Organic acids	Organic acids	921-28-8	A	745230	855630	588040	1117500	1633100	659820	0.820657	1.55805	0.639743	insig
pmb0774	C10H12N2O	N-Hydroxytryptamine*	Alkaloids	Phenolamine	-	A	4116600	4784500	3845200	237660	463180	400580	1.42731	0.086411	-3.53264	down
pme2024	C10H12N2O	Serotonin*	Alkaloids	Plumerane	50-67-9	A	5173200	5863800	4746000	255240	561950	490510	1.42059	0.082855	-3.59327	down
pmb0468	C6H11NO3S	N-Formyl-L-Methionine	Amino acids and derivatives	Amino acids and derivatives	4289-98-9	B	125610	158680	126840	11979	17875	15185	1.43693	0.109549	-3.19035	down
mws1013	C9H6O4	Esculetin	Lignans and Coumarins	Coumarins	305-01-1	A	220520	83165	67967	64354	74896	50241	0.838734	0.509861	-0.971823	insig
pme1021	C6H10O6	D-Glucono-1,5-lactone	Others	Saccharides and Alcohols	90-80-2	B	13257	15678	10401	8423.4	7815.6	11524	1.06724	0.705791	-0.502687	insig
mws0009	C10H10O3	Coniferaldehyde	Phenolic acids	Phenolic acids	20649-42-7	B	26800	16015	62845	222170	137620	203960	1.32124	5.33551	2.41563	up
pmb2795	C10H10O3	4-Methoxycinnamic acid*	Phenolic acids	Phenolic acids	830-09-1	A	427630	266890	124640	162980	180760	96405	0.800529	0.537313	-0.896166	insig
mws1195	C10H10O3	p-Coumaric acid methyl ester*	Phenolic acids	Phenolic acids	3943-97-3	A	662810	375130	178100	197190	214700	112490	0.948903	0.431219	-1.21351	insig
pmb0786	C6H13NO5	D-Glucosamine	Others	Saccharides and Alcohols	3416-24-8	B	94914	67402	86998	104880	83641	78113	0.380833	1.06947	0.0968969	insig
mws2212	C9H8O4	Caffeic acid	Phenolic acids	Phenolic acids	331-39-5	A	436900	1329500	819360	488900	401830	410920	0.981742	0.503392	-0.990247	insig
pme0516	C6H12O6	Inositol	Others	Saccharides and Alcohols	87-89-8	B	214400	199450	175840	64385	111060	83292	1.34386	0.438768	-1.18847	down
mws1164	C6H12O6	D-Fructose*	Others	Saccharides and Alcohols	7660-25-5	A	1371800	1269200	1070400	734900	1069500	1273200	0.741408	0.829229	-0.270158	insig
mws4170	C6H12O6	D-Glucose*	Others	Saccharides and Alcohols	14431-43-7	A	1212600	1293700	1057700	563410	1202300	1449800	0.42217	0.902219	-0.14845	insig
mws0250	C9H11NO3	L-Tyrosine	Amino acids and derivatives	Amino acids and derivatives	60-18-4	A	1976100	2341100	1428900	1646300	1434100	976920	0.928806	0.7061	-0.502056	insig
Lmrn001951	C9H10O4	(S)-2-Hydroxy-3-(4-Hydroxyphenyl)Propanoic Acid	Phenolic acids	Phenolic acids	23508-35-2	B	10469	7389.5	5677.4	5442.4	7480.1	6949.1	0.502703	0.84431	-0.244155	insig
mws1350	C9H10O4	Syringaldehyde; 4-Hydroxy-3,5-Dimethoxybenzaldehyde	Phenolic acids	Phenolic acids	134-96-3	B	9	9	9	8105.6	9	4862.4	1.01075	480.63	8.90878	up
mws0214	C6H14O6	D-Sorbitol	Others	Saccharides and Alcohols	50-70-4	B	13297	17094	7094.6	8671.1	12589	15638	0.0121272	0.984327	-0.02279	insig
pme2237	C6H14O6	Dulcitol	Others	Saccharides and Alcohols	608-66-2	B	10909	9842.4	5418.4	12436	10844	12953	0.892257	1.38453	0.469401	insig
pme2596	C8H9NO4	4-Pyridoxic acid	Others	Vitamin	82-82-6	A	470030	477330	481140	224750	184000	312310	1.33385	0.504767	-0.98631	insig
pme2602	C3H8NO6P	O-Phospho-L-serine	Amino acids and derivatives	Amino acids and derivatives	407-41-0	B	8555.9	20438	10659	21784	7290.8	21197	0.284392	1.2678	0.342323	insig
Zmgn000447	C3H7O7P	3-Phospho-D-glyceric acid	Others	Saccharides and Alcohols	820-11-1	B	400160	265740	513640	1096500	460190	2081600	1.03587	3.0845	1.62504	up
mws0752	C11H22O2	Undecylic Acid	Lipids	Free fatty acids	112-37-8	A	421030	406510	568050	403330	558670	474400	0.188038	1.02924	0.0415824	insig
mws0237	C9H16O4	Azelaic acid	Organic acids	Organic acids	123-99-9	A	966960	1049600	926180	986090	993570	862200	0.425449	0.965719	-0.0503246	insig
pme0122	C8H16N2O3	N6-Acetyl-L-lysine	Amino acids and derivatives	Amino acids and derivatives	692-04-6	A	56113	75334	47151	66313	61226	49215	0.0167735	0.989675	-0.0149731	insig
mws0736	C8H16N2O3	N-Glycyl-L-leucine*	Amino acids and derivatives	Amino acids and derivatives	869-19-2	B	266020	603260	973600	351650	386700	334710	0.676725	0.582273	-0.780231	insig
mws5041	C8H16N2O3	L-Glycyl-L-isoleucine*	Amino acids and derivatives	Amino acids and derivatives	19461-38-2	B	209990	469050	841140	288210	329610	231110	0.666417	0.55844	-0.840525	insig
Zmjp000182	C7H16N4O2	N-Monomethyl-L-arginine	Amino acids and derivatives	Amino acids and derivatives	17035-90-4	B	96000	59188	58548	63517	56572	40242	0.780276	0.750136	-0.414777	insig
pme3388	C7H16N4O2	Homoarginine	Amino acids and derivatives	Amino acids and derivatives	156-86-5	B	7843.3	6262.5	12838	7856.4	13251	8901.1	0.374734	1.11374	0.155418	insig
Zmtn001624	C10H7NO3	N-Acetylisatin	Alkaloids	Plumerane	574-17-4	A	702140	746890	557250	744650	770610	735130	0.78869	1.12167	0.165652	insig
pme0075	C7H11NO5	N-Acetyl-L-glutamic acid	Amino acids and derivatives	Amino acids and derivatives	1188-37-0	A	1636600	1526400	1558000	1678500	1873900	978610	0.255322	0.959756	-0.0592598	insig
pme0278	C7H14N2O4	2,6-Diaminooimelic acid	Amino acids and derivatives	Amino acids and derivatives	583-93-7	B	18992	34169	37768	13220	24878	4945.4	0.938779	0.473374	-1.07895	insig
pmb2561	C7H13NO3S	N-Acetyl-L-methionine	Amino acids and derivatives	Amino acids and derivatives	65-82-7	B	11418	5726.8	16791	11923	21907	11646	0.629385	1.34006	0.422297	insig
Zmyn000453	C6H8O7	Isocitric Acid	Organic acids	Organic acids	320-77-4	A	5956000	10895000	7446000	6209700	6929400	8144900	0.412532	0.875993	-0.191009	insig
mws0281	C6H8O7	Citric Acid	Organic acids	Organic acids	77-92-9	A	4002600	6814700	4898600	3658900	4324600	5397800	0.549328	0.85145	-0.232007	insig
Hmjp002337	C10H8O4	Isoscopoletin (6-Hydroxy-7-Methoxycoumarin)	Lignans and Coumarins	Coumarins	776-86-3	B	102550	177330	296560	183050	126020	192400	0.134445	0.869943	-0.201007	insig
Cmpp003619	C10H8O4	6,7-Dihydroxy-4-methylcoumarin	Lignans and Coumarins	Coumarins	529-84-0	B	98177	371510	407960	379010	182100	253060	0.0717478	0.927674	-0.108311	insig
pme2993	C10H8O4	Scopoletin (7-Hydroxy-5-methoxycoumarin)	Lignans and Coumarins	Coumarins	92-61-5	B	87088	289990	365360	258370	144600	216710	0.0689024	0.834656	-0.260747	insig
mws0277	C7H12O6	Quinic Acid	Organic acids	Organic acids	77-95-2	A	1708300	2917700	2467900	1846600	1920700	2384200	0.500109	0.867153	-0.205641	insig
mws1189	C6H10O7	D-Galacturonic acid*	Organic acids	Organic acids	685-73-4	B	25146	49642	31359	26641	66548	44770	0.474697	1.2997	0.378176	insig
pme3705	C6H10O7	D-Glucoronic acid*	Others	Saccharides and Alcohols	6556-12-3	B	42438	34340	37431	42061	63342	59161	1.13747	1.4409	0.526972	insig
Xmgn006542	C10H10O4	Dimethyl Phthalate	Phenolic acids	Phenolic acids	131-11-3	B	51157	15782	19573	37917	31310	24238	0.376656	1.08037	0.111526	insig
mws0014	C10H10O4	Ferulic acid	Phenolic acids	Phenolic acids	537-98-4	A	787950	3046200	2570100	4419000	2350600	2244300	0.603538	1.40749	0.493122	insig
Lmdn003756	C10H10O4	Methyl caffeate	Phenolic acids	Phenolic acids	3843-74-1	A	96931	170920	431690	1831400	1789400	1190500	1.33559	6.8778	2.78195	up
pme0534	C6H12O7	Gluconic acid	Others	Saccharides and Alcohols	526-95-4	A	165130	213420	144420	64319	157470	45775	1.03492	0.511624	-0.966844	insig
Lmlp002205	C11H16O3	Isololiolide	Terpenoids	Terpene	38274-00-9	B	34895	6892.4	9687.1	28981	14605	20800	0.561851	1.25083	0.322889	insig
pme3827	C9H11NO4	3,4-Dihydroxy-L-phenylalanine (L-Dopa)	Amino acids and derivatives	Amino acids and derivatives	59-92-7	B	21334	16640	13999	97550	259430	121290	1.38841	9.20228	3.20199	up
pmb2497	C9H10O5	4-Hydroxy-3-methoxymandelate	Phenolic acids	Phenolic acids	55-10-7	B	152230	163070	206690	198380	193810	183930	0.730375	1.1037	0.142347	insig
mws0027	C9H10O5	Syringic acid	Phenolic acids	Phenolic acids	530-57-4	B	3029	1793.9	2238.4	9	9	4484.3	0.940946	0.637602	-0.649272	insig
Zmzn000079	C4H9O7P	D-Erythrose-4-phosphate	Others	Saccharides and Alcohols	585-18-2	B	117650	143950	140170	91017	91976	122780	1.12174	0.761065	-0.393909	insig
pmb2640	C12H24O2	Dodecanoic acid (Lauric acid)	Lipids	Free fatty acids	143-07-7	A	74272	90063	69687	83263	84452	124090	0.793868	1.24691	0.31836	insig
mws5037	C9H18N2O3	L-Alanyl-L-leucine	Amino acids and derivatives	Amino acids and derivatives	3303-34-2	B	78966	42755	38502	68460	63231	54420	0.566926	1.16157	0.216082	insig
NK10251888	C8H18N4O2	NG,NG-Dimethyl-L-arginine	Amino acids and derivatives	Amino acids and derivatives	30315-93-6	A	87335	71968	73123	80538	54797	141830	0.24105	1.19249	0.253974	insig
mws0018	C10H26N4	Spermine	Alkaloids	Phenolamine	71-44-3	B	6052200	6804800	6389400	5242800	5429900	5871700	1.23769	0.85961	-0.218246	insig
mws0282	C11H12N2O2	L-Tryptophan	Amino acids and derivatives	Amino acids and derivatives	73-22-3	A	4261000	4959200	4424000	5570300	5506900	4437500	0.846476	1.13709	0.185348	insig
Zmtn001464	C10H7NO4	4,8-Dihydroxyquinoline-2-carboxylic acid	Organic acids	Organic acids	59-00-7	B	59538	50254	39310	26573	16347	9467.9	1.25187	0.351356	-1.50899	down
pmb0818	C11H11NO3	Methoxyindoleacetic acid	Alkaloids	Plumerane	3471-31-6	B	415910	473810	410890	604010	518480	445330	0.972679	1.20545	0.269572	insig
pme1261	C9H19NO4	D-Panthenol	Others	Saccharides and Alcohols	81-13-0	B	23956	12551	105390	117220	69573	5385.5	0.100423	1.35435	0.437603	insig
mws4173	C11H10O4	5,7-Dimethoxycoumarin (Limettin)(Citropten)	Lignans and Coumarins	Coumarins	487-06-9	B	9	9	9	336350	14184	195490	1.41277	20223.1	14.3037	up
pmb1587	C13H18O2	4-Hydroxy-3,5-diisopropylbenzaldehyde	Phenolic acids	Phenolic acids	10537-86-7	B	4499	3600.4	3821.3	5134.5	5378.9	6106.6	1.2915	1.39421	0.479451	insig
Lmln010063	C14H22O	2,6-Di-tert-butylphenol	Phenolic acids	Phenolic acids	128-39-2	A	368480	316720	253450	323950	425670	348210	0.733514	1.16958	0.225995	insig
Zmgn002106	C11H13NO3	N-Acetyl-L-phenylalanine	Amino acids and derivatives	Amino acids and derivatives	2018-61-3	A	46604	81643	85104	123870	301110	75563	0.919561	2.3461	1.23027	insig
mws1014	C10H8O5	Fraxetin (7,8-Dihydroxy-6-methoxycoumarin)	Lignans and Coumarins	Coumarins	574-84-5	B	72732	212640	294390	499770	491670	564640	1.16121	2.684	1.42438	up
mws1212	C11H12O4	Methyl ferulate	Phenolic acids	Phenolic acids	2309-07-1	A	4570800	1970500	1615200	2799000	1183800	1977600	0.459372	0.730755	-0.452541	insig
mws2184	C11H12O4	Ethyl caffeate	Phenolic acids	Phenolic acids	102-37-4	B	12893	6634.6	4441.9	5364.7	5981.1	11774	0.0213379	0.964551	-0.0520709	insig
pmb2620	C11H12O4	3,4-Dimethoxycinnamic acid	Phenolic acids	Phenolic acids	14737-89-4	A	2135200	1075700	842300	1403900	517820	1098800	0.502914	0.745219	-0.424264	insig
pme3443	C11H12O4	Sinapinaldehyde	Phenolic acids	Phenolic acids	4206-58-0	B	8172.7	8718.9	11385	23200	19886	22774	1.40279	2.32913	1.21979	up
Zmyn000108	C6H10O8	D-Saccharic acid*	Others	Saccharides and Alcohols	87-73-0	A	577200	693900	649950	665090	776820	620420	0.548452	1.07354	0.10238	insig
Zmpn000199	C6H10O8	D-Galactaric acid*	Others	Saccharides and Alcohols	526-99-8	A	1029300	1223300	960480	600090	756270	671780	1.33776	0.631214	-0.6638	insig
Hmcn000192	C7H14O7	Sedoheptulose	Others	Saccharides and Alcohols	3019-74-7	A	410170	488370	464640	374780	374840	479840	0.718778	0.901906	-0.148951	insig
mws0853	C11H14O4	Sinapyl alcohol	Phenolic acids	Phenolic acids	537-33-7	B	2687.3	3038.5	11552	9980.8	9196.4	15260	0.989234	1.99315	0.995048	insig
Zmgn003633	C12H20O3	12-Oxo-10E-Dodecenoic Acid	Lipids	Free fatty acids	65410-38-0	B	2114.5	2433.3	1639.6	2032.7	3131.9	3463.3	0.885651	1.39443	0.479676	insig
mws0863	C5H11O7P	2-Deoxyribose-5'-phosphate	Nucleotides and derivatives	Nucleotides and derivatives	102916-66-5	B	21046	52574	22601	19409	31748	18461	0.535709	0.723522	-0.466891	insig
pmb2507	C5H11O7P	2-Deoxyribose-1-phosphate	Nucleotides and derivatives	Nucleotides and derivatives	17210-42-3	B	62591	810450	236040	188420	181660	149800	0.287862	0.468748	-1.09311	insig
pmb2873	C13H13NO2	3-(2-Naphthyl)-L-alanine	Amino acids and derivatives	Amino acids and derivatives	58438-03-2	B	9	28589	12871	7143.5	9	9606.7	0.133685	0.404138	-1.30708	insig
pme0170	C8H16N4O3	N-Acetyl-L-Arginine	Amino acids and derivatives	Amino acids and derivatives	155-84-0	A	23958	13517	18886	30425	33375	39037	1.25817	1.82461	0.86759	insig
mws5045	C12H24O3	12-Hydroxydodecanoic acid	Lipids	Free fatty acids	505-95-3	A	2488.7	1311.2	1777.5	36291	18529	44739	1.40984	17.8504	4.15789	up
mws0677	C12H14N2O2	N-Acetyl-5-hydroxytryptamine	Alkaloids	Alkaloids	1210-83-9	B	248020	204080	165850	172440	117360	118860	1.12273	0.661316	-0.596589	insig
Lmrj001698	C9H18N2O4	L-Seryl-L-Isoleucine	Amino acids and derivatives	Amino acids and derivatives	91086-51-0	A	124540	503900	1340800	111770	79194	52642	1.10159	0.123706	-3.01502	down
mws1337	C9H17NO5	D-Pantothenic Acid	Others	Vitamin	79-83-4	A	1088000	1622300	1323100	1305100	886750	1971400	0.0486837	1.03219	0.0457137	insig
pme1228	C11H12N2O3	5-Hydroxy-L-tryptophan	Amino acids and derivatives	Amino acids and derivatives	56-69-9	A	10651	11053	8836.6	9	9	9	1.44709	0.000884069	-10.1436	down
Hmyp002656	C11H11NO4	Methyl dioxindole-3-acetate	Others	Others	57061-18-4	A	9573.9	4675.9	6557.3	14157	9056.4	7915.1	0.891021	1.49605	0.58116	insig
mws4174	C8H15NO6	N-Acetyl-D-mannosamine	Others	Saccharides and Alcohols	7772-94-3	B	32381	63148	49318	16316	16840	26875	1.26268	0.414444	-1.27075	down
mws2608	C8H15NO6	N-Acetyl-D-galactosamine	Others	Saccharides and Alcohols	1811-31-0	B	26771	32087	32270	11162	7546.2	16073	1.32713	0.381674	-1.38959	down
pme2755	C8H15NO6	N-Acetyl-D-glucosamine	Others	Saccharides and Alcohols	7512-17-6	B	149700	185260	138850	129870	149690	131690	0.846789	0.867964	-0.204293	insig
mws5042	C11H14N2O3	L-Glycyl-L-phenylalanine	Amino acids and derivatives	Amino acids and derivatives	721-66-4	B	114730	194500	385660	159850	132130	125750	0.678825	0.601146	-0.734214	insig
Hmgp005956	C13H18O3	Dehydrovomifoliol	Terpenoids	Monoterpenoids	15764-81-5	B	104540	95069	91207	50655	81854	82960	1.00765	0.740912	-0.432626	insig
mws0520	C11H13NO4	N-Acetyl-L-tyrosine	Amino acids and derivatives	Amino acids and derivatives	537-55-3	A	27443	33630	37967	63757	50595	58215	1.33678	1.7424	0.801073	insig
pmb2643	C14H26O2	Myristoleic acid	Lipids	Free fatty acids	544-64-9	A	1258.2	2287.6	1875.9	2691.5	2083.3	2883	0.955584	1.41244	0.498185	insig
pme1194	C9H13N3O4	2'-Deoxycytidine	Nucleotides and derivatives	Nucleotides and derivatives	951-77-9	B	25048	75122	34935	18374	29529	12420	0.988521	0.44649	-1.1633	insig
mws0119	C14H28O2	Myristic Acid	Lipids	Free fatty acids	544-63-8	A	8520200	10835000	8743700	7827100	8077500	10213000	0.482046	0.929488	-0.105491	insig
Lmhp001461	C11H20N2O3	L-Prolyl-L-Leucine	Amino acids and derivatives	Amino acids and derivatives	52899-07-7	B	57975	95523	65012	54746	57376	36919	0.983548	0.682079	-0.55199	insig
mws0474	C12H22O4	Dodecanedioic aicd	Organic acids	Organic acids	693-23-2	A	705.07	1276.8	1206.1	724.38	969.09	990.86	0.479766	0.842019	-0.248076	insig
Lmhp001670	C11H22N2O3	L-Valyl-L-Leucine	Amino acids and derivatives	Amino acids and derivatives	3989-97-7	B	244170	1005300	1683300	184510	135920	138000	1.1626	0.156313	-2.67749	down
pmb0962	C10H22N2O4	L-Lysine-Butanoic Acid	Amino acids and derivatives	Amino acids and derivatives	80407-71-2	B	10655000	11597000	10881000	9986400	15105000	11312000	0.443961	1.09871	0.135804	insig
mws4176	C12H16N2O3	L-Alanyl-L-Phenylalanine	Amino acids and derivatives	Amino acids and derivatives	3061-90-3	B	30228	102840	158440	18609	14108	8707	1.2314	0.142102	-2.815	down
Lmhn003240	C11H10O6	Benzoylmalic acid	Phenolic acids	Phenolic acids	22138-51-8	A	6374300	15692000	7624100	53632	158990	77186	1.42525	0.009761	-6.67876	down
pmn001669	C12H14O5	Methyl sinapate	Phenolic acids	Phenolic acids	20733-94-2	A	9778	5232.2	3164.9	3299.5	1600.8	2354.5	1.08254	0.399161	-1.32496	down
pme2827	C16H32O	Palmitaldehyde	Lipids	Free fatty acids	629-80-1	B	4863400	4677000	4682800	4944300	4873300	5004800	1.16861	1.04213	0.059533	insig
pme0264	C10H14N2O5	Thymidine	Nucleotides and derivatives	Nucleotides and derivatives	50-89-5	B	110330	152690	118410	70421	101810	60149	1.17174	0.609234	-0.714932	insig
mws0359	C15H30O2	Pentadecanoic Acid	Lipids	Free fatty acids	1002-84-2	A	108700	148750	133240	91605	84213	137660	0.820862	0.80237	-0.31766	insig
pme3732	C9H13N3O5	Cytidine	Nucleotides and derivatives	Nucleotides and derivatives	65-46-3	B	248040	800640	758300	300100	358450	277980	0.824291	0.518285	-0.948183	insig
ML10180524	C9H13N3O5	Cytarabine	Nucleotides and derivatives	Nucleotides and derivatives	147-94-4	B	235430	906380	755690	151450	247660	144390	1.12646	0.28643	-1.80375	down
mws0248	C9H12N2O6	Uridine	Nucleotides and derivatives	Nucleotides and derivatives	58-96-8	A	224070	1557400	998350	313570	347080	121400	0.90926	0.281331	-1.82966	insig
pme2266	C10H16N2O3S	Biotin	Others	Vitamin	58-85-5	B	106010	220320	142620	157130	201120	233730	0.674561	1.26235	0.336114	insig
Lmhp002031	C12H24N2O3	L-Leucyl-L-Leucine	Amino acids and derivatives	Amino acids and derivatives	3303-31-9	B	129580	501820	795810	105570	117500	97374	1.0847	0.224525	-2.15505	down
pmb2591	C13H14N2O3	N-Acetyl-L-Tryptophan	Amino acids and derivatives	Amino acids and derivatives	1218-34-4	A	9235400	28927000	27591000	12742000	31137000	9759100	0.287621	0.815746	-0.293807	insig
mws0124	C13H14N2O3	N-(3-Indolylacetyl)-L-alanine	Amino acids and derivatives	Amino acids and derivatives	57105-39-2	B	8196.1	7636	10980	14341	13048	17080	1.28374	1.65854	0.729916	insig
pme2563	C8H14N2O5S	γ-Glu-Cys	Amino acids and derivatives	Amino acids and derivatives	636-58-8	B	42883	25791	8425.8	17051	19461	12515	0.391737	0.63589	-0.653151	insig
pme3961	C10H13N5O3	2'-Deoxyadenosine	Nucleotides and derivatives	Nucleotides and derivatives	958-09-8	A	139800	456530	415830	182630	205030	113820	0.846872	0.495455	-1.01317	insig
Lmhn002629	C11H10O7	Benzoyltartaric acid	Phenolic acids	Phenolic acids	-	B	9	9	9	403020	740570	695590	1.4459	68117.8	16.0557	up
Lmhn003373	C11H10O7	p-Hydroxybenzoylmalic acid	Phenolic acids	Phenolic acids	-	B	502780	1311600	462440	12438	56891	18604	1.37373	0.038621	-4.69447	down
Hmbp003234	C12H14O6	1-O-Caffeoylglycerol	Lipids	Glycerol ester	-	B	44518	26299	52185	54956	42139	67931	0.788381	1.34165	0.424012	insig
mws0361	C16H30O2	Palmitoleic Acid	Lipids	Free fatty acids	373-49-9	A	1765.2	4573.8	2930.1	3703.1	2248.2	3420.3	0.117382	1.01106	0.0158661	insig
pma3101	C11H14NO6+	Nicotinate D-ribonucleoside	Others	Vitamin	17720-18-2	B	519270	1818100	1995400	415140	429740	432410	1.12216	0.294798	-1.7622	down
mws1488	C16H32O2	Palmitic acid	Lipids	Free fatty acids	57-10-3	A	12762	17995	16158	12477	11750	13030	1.05862	0.794138	-0.332538	insig
mws0120	C8H20NO6P	Choline Alfoscerate	Lipids	PC	28319-77-9	B	418570	449420	281720	46582	68423	25115	1.38406	0.121874	-3.03654	down
pme1187	C10H14N2O6	5-Methyluridine	Nucleotides and derivatives	Nucleotides and derivatives	1463-10-1	B	2303.4	3240.9	2339.3	1845	3549.1	1895.3	0.332509	0.924628	-0.113055	insig
Zmyn000110	C6H14NO8P	D-Glucosamine 1-phosphate	Others	Saccharides and Alcohols	2152-75-2	B	80312	67747	101390	49390	59815	37133	1.17952	0.586645	-0.76944	insig
mws1090	C6H13O9P	Glucose-1-phosphate*	Others	Saccharides and Alcohols	59-56-3	A	3462000	3208600	2660200	2955400	2474700	3068600	0.615652	0.910822	-0.134759	insig
mws0866	C6H13O9P	D-Glucose 6-phosphate*	Others	Saccharides and Alcohols	56-73-5	A	4266400	3963100	3273000	3678500	2685400	3851900	0.62017	0.888137	-0.171145	insig
pme3313	C6H13O9P	D-Fructose 6-phosphate*	Others	Saccharides and Alcohols	643-13-0	A	532590	403650	380120	599510	349430	863050	0.59663	1.37652	0.461021	insig
Cmpp007319	C15H16O4	7-Methoxy-5-Prenyloxycoumarin	Lignans and Coumarins	Coumarins	35590-41-1	A	3709	1712.5	1805.2	1983	2827.9	2214.8	0.0809624	0.972186	-0.040695	insig
Zmpn000095	C6H15O9P	Sorbitol-6-phosphate	Others	Saccharides and Alcohols	20479-58-7	B	29648	41374	52793	31862	59575	29370	0.108182	0.975706	-0.0354821	insig
Lmhp001732	C14H18N2O3	L-Prolyl-L-Phenylalanine	Amino acids and derivatives	Amino acids and derivatives	13589-02-1	B	41935	64193	41914	37362	40624	37165	0.92328	0.777827	-0.36248	insig
mws0715	C13H16N2O4	Phenylacetyl-L-glutamine	Amino acids and derivatives	Amino acids and derivatives	28047-15-6	B	18871	31119	15505	24391	20552	26204	0.350897	1.0863	0.119418	insig
Lmlp003161	C14H20N2O3	N-Feruloylputrescine	Alkaloids	Phenolamine	501-13-3	B	18081	11904	14262	11851	4400.5	7948.2	1.0585	0.546923	-0.87059	insig
Lmhp002001	C14H20N2O3	L-Valyl-L-Phenylalanine	Amino acids and derivatives	Amino acids and derivatives	3918-92-1	B	97327	273850	372230	52632	60922	45324	1.24241	0.213716	-2.22623	down
pme1184	C10H13N5O4	2'-Deoxyguanosine	Nucleotides and derivatives	Nucleotides and derivatives	961-07-9	B	214210	372870	276630	178770	137970	224070	1.08367	0.626148	-0.675425	insig
pme0230	C10H13N5O4	Adenosine	Nucleotides and derivatives	Nucleotides and derivatives	58-61-7	A	914010	3795200	2852600	1381300	1325900	774580	0.818804	0.460443	-1.11891	insig
pme2890	C8H16N2O4S2	L-Homocystine	Amino acids and derivatives	Amino acids and derivatives	626-72-2	B	6025.6	15571	20820	3472.7	3313.7	4596.6	1.21612	0.268362	-1.89775	down
mws1060	C10H12N4O5	9-(Arabinosyl)hypoxanthine	Nucleotides and derivatives	Nucleotides and derivatives	7013-16-3	A	110620	85872	96207	270140	282670	103280	1.07091	2.24152	1.16448	up
pmp000087	C13H16O6	2-Feruloyl-sn-glycerol	Phenolic acids	Phenolic acids	-	A	4680500	3680900	2755900	4390200	3697700	5892000	0.69466	1.25749	0.330548	insig
pmp000086	C13H16O6	1-Feruloyl-sn-glycerol	Phenolic acids	Phenolic acids	-	B	2786000	2675100	3069900	4611500	2227000	5022900	0.655248	1.39039	0.475488	insig
mws0383	C17H32O2	10-Heptadecenoic Acid	Lipids	Free fatty acids	29743-97-3	A	217210	316430	430760	230870	113540	288150	0.805802	0.65591	-0.608429	insig
mws1175	C16H14O4	Pinostrobin	Flavonoids	Dihydroflavone	480-37-5	B	1722.1	1973.7	1490.3	4333.1	2063.5	2501.8	1.0355	1.71582	0.778896	insig
mws1297	C13H18O6	Benzyl glucoside	Phenolic acids	Phenolic acids	4304-12-5	A	51727	87697	49999	88000	73386	106790	0.92469	1.41575	0.501569	insig
pme0376	C15H12O5	Naringenin (5,7,4'-Trihydroxyflavanone)	Flavonoids	Dihydroflavone	480-41-1	A	71031	78951	64544	18388	20735	13433	1.41793	0.244987	-2.02923	down
pme3472	C12H16O7	Arbutin	Phenolic acids	Phenolic acids	497-76-7	B	106980	221360	95393	26051	84458	19898	1.13848	0.307757	-1.70013	down
Lmmn003323	C16H32O3	2-Hydroxyhexadecanoic acid	Organic acids	Organic acids	764-67-0	B	159900	414110	316050	105840	115730	136230	1.19745	0.401995	-1.31475	down
pmp001264	C16H35NO2	Hexadecylsphingosine	Lipids	Sphingolipids	-	A	2654100	1919400	1934000	2599400	2342100	2443900	0.763228	1.13491	0.182573	insig
pmb1574	C18H28O2	9,12-Octadecadien-6-Ynoic Acid	Lipids	Free fatty acids	61481-29-6	B	25414	38700	24106	22011	22653	26956	0.759014	0.811834	-0.300743	insig
mws1038	C11H22N2O4S	Pantetheine	Others	Others	496-65-1	B	4496.8	6739.2	5448.5	5072.3	11628	4125.6	0.281869	1.24822	0.31987	insig
Lmlp012720	C16H22O4	Dibutyl phthalate*	Phenolic acids	Phenolic acids	84-74-2	A	21444000	17095000	16754000	13999000	18741000	35558000	0.328674	1.2352	0.304746	insig
Lmxp011770	C16H22O4	Diisobutyl phthalate*	Phenolic acids	Phenolic acids	84-69-5	A	21530000	16911000	16366000	14265000	18510000	37136000	0.373835	1.27559	0.351159	insig
mws5035	C15H22N2O3	L-Leucyl-L-phenylalanine	Amino acids and derivatives	Amino acids and derivatives	56217-82-4	B	131480	421980	442210	59438	39152	47683	1.31583	0.146909	-2.767	down
Lmbn005923	C18H30O2	Crepenynic acid	Lipids	Free fatty acids	2277-31-8	A	231310	351460	402230	211670	154990	163830	1.21757	0.538569	-0.892798	insig
pmb0889	C18H30O2	Punicic acid (9Z,11E,13Z-octadecatrienoic acid)	Lipids	Free fatty acids	544-72-9	B	229410	268450	276190	268200	214040	371440	0.29506	1.10287	0.141269	insig
mws0367	C18H30O2	α-Linolenic Acid*	Lipids	Free fatty acids	463-40-1	A	13449000	21183000	25330000	12367000	9510000	9177700	1.20075	0.517906	-0.949237	insig
mws0366	C18H30O2	γ-Linolenic Acid*	Lipids	Free fatty acids	506-26-3	A	14514000	22982000	26985000	13738000	10072000	10290000	1.18992	0.528838	-0.919102	insig
Lmhn002926	C13H12O7	p-Coumaroylmalic acid	Phenolic acids	Phenolic acids	-	A	7940000	6587300	6025500	5784800	7010200	5787500	0.616847	0.904135	-0.14539	insig
mws0629	C13H16N2O5	L-Aspartyl-L-Phenylalanine	Amino acids and derivatives	Amino acids and derivatives	13433-09-5	A	37389	49296	33941	19579	15920	33696	1.12849	0.573633	-0.801801	insig
mws1491	C18H32O2	Linoleic acid	Lipids	Free fatty acids	60-33-3	A	33251000	49024000	49620000	27381000	24938000	23690000	1.28616	0.576284	-0.795148	insig
Lmbn006152	C18H32O2	(9Z,11E)-Octadecadienoic acid	Lipids	Free fatty acids	2540-56-9	B	22335	29359	33619	15016	13073	10986	1.34369	0.458019	-1.12652	down
Hmhp001812	C11H15N5O4	2'-O-Methyladenosine	Nucleotides and derivatives	Nucleotides and derivatives	2140-79-6	A	42749	80923	137220	39254	52603	40637	0.909172	0.50785	-0.977526	insig
YC512118	C18H35NO	Oleamide (9-Octadecenamide)	Lipids	Free fatty acids	301-02-0	A	15418	29743	18906	10710	11719	29554	0.533202	0.811385	-0.301542	insig
mws2623	C18H34O2	11-Octadecanoic acid(Vaccenic acid)	Lipids	Free fatty acids	506-17-2	A	1458800	2267600	2501200	1504100	1282600	1373200	1.07145	0.667978	-0.582127	insig
pme3350	C10H13N5O5	8-Hydroxy-2-deoxyguanosine	Nucleotides and derivatives	Nucleotides and derivatives	88847-89-6	B	9	9	9	9	9	3890	0.630982	144.741	7.17733	insig
pme1178	C10H13N5O5	Guanosine	Nucleotides and derivatives	Nucleotides and derivatives	118-00-3	A	5584300	17904000	14280000	6989200	7708600	3033000	0.885834	0.469462	-1.09092	insig
pmp001252	C17H17NO3	p-Coumaroyltyramine	Alkaloids	Phenolamine	36417-86-4	B	9	3192.6	4625.6	9	9	8859.8	0.409632	1.13422	0.181706	insig
mws0051	C16H12O5	Acacetin	Flavonoids	Flavonoid	480-44-4	B	821060	117970	912160	141540	554040	268080	0.397091	0.520562	-0.941857	insig
mws0129	C16H12O5	Genkwanin (Apigenin 7-methyl ether)	Flavonoids	Flavonoid	437-64-9	B	784960	110850	902080	145820	545080	260950	0.365671	0.529426	-0.917499	insig
mws0668	C10H12N4O6	Xanthosine	Nucleotides and derivatives	Nucleotides and derivatives	146-80-5	A	544850	419960	533680	1172800	1316300	555350	1.10834	2.03168	1.02267	up
Zmyn005026	C18H36O2	16-Methylheptadecanoic acid	Lipids	Free fatty acids	2724-58-5	B	8101100	7005500	7243900	18494000	9158500	7382500	0.803563	1.56753	0.64849	insig
mws1489	C18H36O2	Stearic Acid	Lipids	Free fatty acids	57-11-4	A	18297000	17031000	16731000	28545000	16593000	12939000	0.171704	1.1156	0.157819	insig
mws1068	C15H10O6	Kaempferol (3,5,7,4'-Tetrahydroxyflavone)	Flavonoids	Flavonols	520-18-3	A	746400	726760	862770	53857	117310	39156	1.39332	0.0900382	-3.47332	down
mws1521	C13H18O7	Salicin	Phenolic acids	Phenolic acids	138-52-3	A	150810	160130	135620	239590	412830	171720	1.05855	1.84553	0.884035	insig
mws1436	C18H38O2	1,18-Octadecanediol	Lipids	Free fatty acids	3155-43-9	B	9	9	9	9	9	14697	0.630982	545	9.09011	insig
mws1094	C15H12O6	Aromadendrin (Dihydrokaempferol)	Flavonoids	Dihydroflavonol	480-20-6	B	23530	27563	20730	1860.7	6093.9	3375.9	1.36087	0.157756	-2.66423	down
pmn001686	C16H32O4	10,16-Dihydroxypalmitic acid	Lipids	Free fatty acids	3233-90-7	A	56877	33460	64960	54143	51698	63431	0.421396	1.08999	0.124313	insig
pme3163	C7H15O10P	D-Sedoheptuiose 7-phosphate	Others	Saccharides and Alcohols	2646-35-7	B	1391300	877810	1468400	594410	671060	512010	1.27712	0.475579	-1.07224	down
pmb2657	C10H18N4O6	Argininosuccinic acid	Organic acids	Organic acids	2387-71-5	B	183980	209590	138960	101390	103530	120460	1.28434	0.611008	-0.710737	insig
Zmyn004548	C18H28O3	12-Oxo-phytodienoic acid	Lipids	Free fatty acids	85551-10-6	B	3693.5	8749.9	11500	4301	1986.4	2679.9	1.08498	0.374521	-1.41688	down
pmb2792	C18H30O3	13-Hydroxy-6,9,11-octadecatrienoic acid	Lipids	Free fatty acids	74784-20-6	B	25166	28560	22079	32839	20145	21861	0.148868	0.987336	-0.0183871	insig
pmb2787	C18H30O3	9-Oxo-10E,12Z-octadecadienoic acid	Lipids	Free fatty acids	54232-59-6	A	22547	26675	34266	29362	16286	33869	0.232698	0.952436	-0.0703055	insig
pmb2786	C18H30O3	9-Hydroxy-10,12,15-octadecatrienoic acid*	Lipids	Free fatty acids	89886-42-0	B	9605.4	18656	22042	7995.5	6650.3	8035.1	1.18316	0.450882	-1.14918	down
Lmbn005443	C18H30O3	13-KODE; (9Z,11E)-13-Oxooctadeca-9,11-dienoic acid*	Lipids	Free fatty acids	54739-30-9	B	10353	19078	19285	9070.4	5687.4	8807	1.18113	0.483718	-1.04776	down
Zmpn003368	C18H30O3	13S-Hydroxy-9Z,11E,15Z-octadecatrienoic acid	Lipids	Free fatty acids	87984-82-5	B	78333	99422	321360	427970	263620	680950	1.08069	2.74995	1.4594	up
Lmqp000329	C8H14N3O7P	5-Aminoimidazole ribonucleotide	Nucleotides and derivatives	Nucleotides and derivatives	25635-88-5	A	1009000	1055600	614780	75364	159300	35556	1.3491	0.100852	-3.30969	down
Lmhn102068	C13H12O8	2-O-Caffeoylmalic acid	Phenolic acids	Phenolic acids	53755-04-7	B	9335.5	5116.8	1141.2	20778	25131	34136	1.19175	5.13323	2.35987	up
pmb2799	C18H32O3	12,13-Epoxy-9-Octadecenoic Acid	Lipids	Free fatty acids	6799-85-5	B	27863	31730	33047	28554	26899	25455	1.06116	0.873359	-0.195353	insig
Lmbn005369	C18H32O3	13(S)-HODE;13(S)-Hydroxyoctadeca-9Z,11E-dienoic acid*	Lipids	Free fatty acids	10219-69-9	A	238380	282640	304520	304380	234440	382350	0.400784	1.11584	0.158129	insig
Lmbn005662	C18H32O3	9(10)-EpOME;(9R,10S)-(12Z)-9,10-Epoxyoctadecenoic acid	Lipids	Free fatty acids	16833-56-0	A	84918	106030	116750	79889	72923	74221	1.20198	0.737844	-0.438613	insig
Rfmb091	C18H32O3	9S-Hydroxy-10E,12Z-octadecadienoic acid*	Lipids	Free fatty acids	15514-85-9	A	235720	288980	303400	301290	233750	369080	0.335293	1.0918	0.126709	insig
pme1474	C11H15N5O3S	5'-Deoxy-5'-(methylthio)adenosine	Nucleotides and derivatives	Nucleotides and derivatives	2457-80-9	A	6724400	5146900	4650000	3378200	4235400	3802100	1.18142	0.690969	-0.533308	insig
pmb0197	C11H15N5O5	N7-Methylguanosine	Nucleotides and derivatives	Nucleotides and derivatives	20244-86-4	B	95253	74427	64559	63829	54413	54822	1.10495	0.738835	-0.436676	insig
Zmyn004714	C18H34O3	Ricinoleic acid	Lipids	Free fatty acids	141-22-0	A	145480	186170	192360	192200	163440	146420	0.24364	0.958111	-0.0617346	insig
Zmgn005057	C18H34O3	9,10-Epoxyoctadecanoic Acid	Lipids	Free fatty acids	2443-39-2	A	230300	211640	304070	327470	182990	409100	0.434769	1.23264	0.301749	insig
pmf0297	C20H42O	1-Eicosanol	Lipids	Free fatty acids	629-96-9	B	155370	183580	192310	207000	168710	159630	0.0447727	1.00768	0.0110374	insig
Lmhn001386	C12H12O9	Vnilloyltartaric acid	Phenolic acids	Phenolic acids	-	B	11034	16820	17118	17402	15324	12343	0.0546817	1.00216	0.00310839	insig
pmp000001	C16H12O6	Hispidulin (5,7,4'-Trihydroxy-6-methoxyflavone)	Flavonoids	Flavonoid	1447-88-7	B	7888	7118.1	5742	30075	7859.8	7329.4	0.740846	2.18161	1.12539	insig
Zmhn001926	C13H16O8	1-O-Salicyl-D-glucose	Phenolic acids	Phenolic acids	60517-74-0	A	7395400	11698000	6249200	44886000	45779000	30565000	1.38519	4.78364	2.25811	up
pmb3142	C13H16O8	Salicylic acid-2-O-glucoside	Phenolic acids	Phenolic acids	10366-91-3	A	5178700	10077000	5182600	2515800	5386800	2645600	1.03815	0.5161	-0.954278	insig
pme2816	C20H28O2	4-Oxoretinol	Others	Vitamin	62702-55-0	B	2943.8	2658.9	2861.8	4484.9	3761.1	6391.2	1.22956	1.72925	0.790143	insig
Lmqn008288	C18H36O3	3-Hydroxyoctadecanoic Acid	Lipids	Free fatty acids	45261-96-9	B	456410	473960	443380	479440	467820	522220	0.92052	1.06969	0.0971862	insig
pme2954	C15H10O7	Quercetin	Flavonoids	Flavonols	117-39-5	A	87570	36640	56787	155420	205590	149960	1.30699	2.82309	1.49727	up
Cmsp004086	C16H14O6	Dihydrokaempferide	Flavonoids	Flavonols	137225-59-3	B	32542	28892	24411	221780	307640	194990	1.43177	8.43858	3.077	up
Zmhn000892	C13H18O8	4-O-Glucosyl-3,4-dihydroxybenzyl alcohol	Phenolic acids	Phenolic acids	-	A	157160	78599	95076	253740	297530	330490	1.33102	2.66526	1.41427	up
mws1375	C12H21N3O6	Nicotianamine	Amino acids and derivatives	Amino acids and derivatives	34441-14-0	B	173200	87066	207780	175830	113990	127580	0.136777	0.891793	-0.16522	insig
mws0044	C15H12O7	Dihydroquercetin(Taxifolin)	Flavonoids	Dihydroflavonol	480-18-2	B	9	9	9	44609	62399	28313	1.44573	5011.89	12.2911	up
pme1086	C10H17N3O6S	Glutathione reduced form	Amino acids and derivatives	Amino acids and derivatives	70-18-8	A	136880	139240	251930	498440	612480	382750	1.3306	2.82865	1.50011	up
pmn001610	C20H36O2	Eicosadienoic acid	Lipids	Free fatty acids	5598-38-9	A	34574	87059	63928	49913	21089	45436	0.764933	0.627492	-0.672332	insig
Lmhn003074	C14H14O8	Feruloylmalic acid	Phenolic acids	Phenolic acids	-	A	12824000	8256300	7638400	8080900	9438500	7983800	0.383635	0.888035	-0.171312	insig
pmb2791	C18H30O4	9-Hydroperoxy-10E,12,15Z-octadecatrienoic acid	Lipids	Free fatty acids	111004-08-1	A	366440	433580	74059	265360	284800	141380	0.0589499	0.791164	-0.337951	insig
pmn001606	C20H38O2	Eicosenoic acid	Lipids	Free fatty acids	26764-41-0	A	777760	288680	707870	1057900	1288100	1256700	1.14155	2.03048	1.02182	up
Lmtp001399	C14H17NO7	5,6-Dihydroxyindole-5-O-β-glucoside	Alkaloids	Alkaloids	-	B	9	9	9	187710	253940	178680	1.44681	22975.2	14.4878	up
pme3967	C12H17N5O5	2-(Dimethylamino)guanosine	Nucleotides and derivatives	Nucleotides and derivatives	2140-67-2	B	77343	105770	99880	150360	114240	111100	1.03851	1.32759	0.408815	insig
Lmhn001477	C13H12O9	2-Caffeoyl-L-tartaric acid (Caftaric acid)	Phenolic acids	Phenolic acids	67879-58-7	A	9	9	9	471620	764040	601070	1.44653	68027	16.0538	up
mws0636	C18H20N2O3	L-Phenylalanyl-L-phenylalanine	Amino acids and derivatives	Amino acids and derivatives	2577-40-4	A	21526	57554	44436	12060	8418	6322.5	1.31141	0.21698	-2.20437	down
Zmjn004133	C18H32O4	9S-Hydroperoxy-10E,12Z-octadecadienoic acid	Lipids	Free fatty acids	5502-91-0	A	45300	53591	38462	52508	57920	44575	0.641758	1.1285	0.174408	insig
Lmbn004685	C18H32O4	5S,8R-DiHODE; (5S,8R,9Z,12Z)-5,8-Dihydroxyoctadeca-9,12-dienoate	Lipids	Free fatty acids	-	A	27147	80233	9814.6	18349	16791	13233	0.621712	0.412758	-1.27663	insig
Lmbn005287	C18H32O4	7S,8S-DiHODE; (9Z,12Z)-(7S,8S)-Dihydroxyoctadeca-9,12-dienoic acid	Lipids	Free fatty acids	143288-65-7	A	91081	168270	179260	77713	118280	83771	0.926708	0.637841	-0.648732	insig
pmn001689	C18H32O4	9-Hydroxy-12-oxo-15(Z)-octadecenoic acid	Lipids	Free fatty acids	-	B	34822	46590	71314	48834	40018	48902	0.197278	0.901968	-0.148851	insig
pmb2804	C18H32O4	13S-Hydroperoxy-9Z,11E-octadecadienoic acid	Lipids	Free fatty acids	33964-75-9	B	193030	170780	195090	220630	193430	230800	1.04866	1.1538	0.206396	insig
pmf0397	C20H40O2	Arachidic acid	Lipids	Free fatty acids	506-30-9	B	2123500	1671900	1770400	2861200	1673000	3181200	0.816565	1.38622	0.471152	insig
mws1433	C18H19NO4	N-Feruloyltyramine	Alkaloids	Phenolamine	66648-43-9	A	528070	720820	428860	471230	386380	144850	0.88098	0.597503	-0.742983	insig
mws1174	C17H14O6	3-O-Acetylpinobanksin	Flavonoids	Dihydroflavonol	52117-69-8	A	4070.1	9	9	27003	9	9	0.138524	6.60967	2.72458	insig
Lmmn002179	C14H18O8	Methyl salicylate-2-O-glucoside	Phenolic acids	Phenolic acids	10019-60-0	B	54321	50956	38210	80562	47082	109100	0.914072	1.64993	0.722408	insig
Lmbn005487	C18H34O4	12,13-DHOME; (9Z)-12,13-Dihydroxyoctadec-9-enoic acid	Lipids	Free fatty acids	263399-35-5	B	22220	25305	23509	20739	22215	22903	0.911813	0.927119	-0.109173	insig
mws0066	C16H12O7	Isorhamnetin	Flavonoids	Flavonols	480-19-3	A	36418	43270	50130	81308	176130	51038	1.03583	2.37622	1.24867	up
Lmmn004912	C16H12O7	3-O-Methylquercetin	Flavonoids	Flavonols	1486-70-0	B	4791.4	2664.4	5218.7	9059.6	5923.5	18029	1.0934	2.60461	1.38107	up
pmb2871	C13H16O9	1-O-Gentisoyl-D-glucoside*	Phenolic acids	Phenolic acids	23445-11-6	A	304990	321020	218610	598490	1270900	476360	1.20038	2.77728	1.47367	up
pmn001367	C13H16O9	Protocatechuic acid-4-O-glucoside*	Phenolic acids	Phenolic acids	-	A	196140	231500	157690	442640	889000	292740	1.16734	2.77515	1.47257	up
Lmfp001509	C13H16O9	1-O-Galloyl-rhamnose	Tannins	Tannin	-	B	19619	18247	20287	30082	20031	37213	1.02341	1.50166	0.586558	insig
Hmtn001120	C14H20O8	5-(2-Hydroxyethyl)-2-O-glucosylphenol	Phenolic acids	Phenolic acids	-	A	101270	32517	59252	799750	559210	895860	1.39592	11.6806	3.54605	up
pmb2221	C18H39NO3	4-Hydroxysphinganine	Lipids	Sphingolipids	554-62-1	A	95681	164130	105590	116620	142150	76670	0.260702	0.918005	-0.123426	insig
pmb0751	C16H16O7	Trans-5-O-(p-Coumaroyl)shikimate	Phenolic acids	Phenolic acids	-	B	99568	159330	145600	163540	168280	181380	0.941316	1.26873	0.343389	insig
mws0582	C11H19N3O6S	S-(Methyl)glutathione	Amino acids and derivatives	Amino acids and derivatives	2922-56-7	A	54957	40021	67387	70147	75305	89768	1.1082	1.44871	0.53477	insig
pmn001513	C14H10O9	Digallic Acid	Tannins	Tannin	536-08-3	B	4020.1	5958.2	15333	13681	8845.1	8127.7	0.537072	1.21107	0.276284	insig
pme3174	C9H14N3O8P	Cytidine 5'-monophosphate(Cytidylic acid)	Nucleotides and derivatives	Nucleotides and derivatives	63-37-6	B	25028	73434	189410	52955	23369	47187	0.606069	0.429048	-1.22079	insig
pme3188	C9H13N2O9P	Uridine 5'-monophosphate	Nucleotides and derivatives	Nucleotides and derivatives	58-97-9	B	125790	239210	647990	25593	13918	40518	1.30592	0.0790028	-3.66195	down
mws0983	C20H39NO2	N-Oleoylethanolamine	Alkaloids	Alkaloids	111-58-0	B	34456	81635	84716	28481	33859	26513	1.12063	0.44248	-1.17632	down
Lmhn002140	C14H14O9	Feruloyltartaric acid (Fertaric acid)	Phenolic acids	Phenolic acids	-	B	9	9	9	1888300	2544600	1774700	1.44686	229911	17.8107	up
Zmhn002301	C15H18O8	p-Coumaric acid-4-O-glucoside	Phenolic acids	Phenolic acids	117405-48-8	A	32588000	22238000	29637000	23343000	23240000	29874000	0.444149	0.905213	-0.143671	insig
pmn001690	C16H24O7	3-Hydroxy-4-isopropylbenzylalcohol-3-O-glucoside	Phenolic acids	Phenolic acids	-	B	155370	244830	199310	26697	23466	29140	1.43538	0.13228	-2.91834	down
mws0884	C10H12N5O6P	Cyclic 3',5'-Adenylic acid	Nucleotides and derivatives	Nucleotides and derivatives	60-92-4	A	119310	435580	327000	187400	183510	100610	0.744915	0.53467	-0.90328	insig
Lmmn003663	C14H18O9	5-Glucosyloxy-2-Hydroxybenzoic acid methyl ester	Phenolic acids	Phenolic acids	-	B	61872	77926	53027	14838	11824	4918.6	1.3536	0.163779	-2.61018	down
Lmtn002565	C14H18O9	1-O-Vanilloyl-D-Glucose	Phenolic acids	Phenolic acids	-	B	533390	485270	589140	672210	464670	629990	0.461588	1.09894	0.136108	insig
Zmhn001883	C14H18O9	Vanillic acid-4-O-glucoside	Phenolic acids	Phenolic acids	32142-31-7	B	37299	29741	39965	2519.2	12072	2064.8	1.27464	0.155656	-2.68356	down
pmn001517	C15H22O8	3,4,5-Trimethoxyphenyl-1-O-Glucoside	Phenolic acids	Phenolic acids	-	B	2181400	4697800	1844800	7722900	4369600	7339000	1.11046	2.22736	1.15534	up
Hmqn003054	C18H34O5	9,10,11-Trihydroxy-12-octadecenoic acid	Lipids	Free fatty acids	61911-67-9	A	22688	19581	26866	52006	40538	50171	1.379	2.06429	1.04565	up
pmn001694	C18H34O5	9,10,13-Trihydroxy-11-Octadecenoic Acid	Lipids	Free fatty acids	29907-57-1	A	372360	389500	415010	790070	563190	717090	1.35022	1.7592	0.81492	insig
Lmbn004240	C18H34O5	9,10-Dihydroxy-12,13-epoxyoctadecanoic acid	Lipids	Free fatty acids	-	B	16026	17307	18698	21989	20117	23173	1.27457	1.25462	0.327248	insig
Lmbn003970	C18H34O5	9,12,13-TriHOME; 9(S),12(S),13(S)-Trihydroxy-10(E)-octadecenoic acid	Lipids	Free fatty acids	97134-11-7	A	27084	33932	30417	85452	86039	92280	1.43138	2.88486	1.5285	up
pmp001284	C19H38O4	Monopalmitin	Lipids	Glycerol ester	542-44-9	A	7030.9	8721	9531.1	8182.7	5673.3	5212.1	0.955713	0.754187	-0.407007	insig
pme3184	C10H14N5O6P	2'-Deoxyadenosine-5'-monophosphate	Nucleotides and derivatives	Nucleotides and derivatives	653-63-4	A	352540	363430	343720	216120	273280	291400	1.25231	0.736819	-0.440617	insig
pmb0789	C14H21NO8	Pyridoxine-5'-O-glucoside	Others	Vitamin	-	B	486820	485050	522610	192060	250120	229680	1.41533	0.449561	-1.15341	down
Lmfn000604	C13H16O10	6-O-Galloyl-D-glucose	Tannins	Tannin	13186-19-1	A	145510	122140	142150	176610	164410	218710	1.20571	1.36586	0.449811	insig
pmn001518	C13H16O10	1-O-Galloyl-D-glucose	Tannins	Tannin	58511-73-2	A	463110	369740	317010	424250	593630	361090	0.622912	1.19925	0.262133	insig
Hmln000873	C13H16O10	2-O-Galloyl-D-glucose	Tannins	Tannin	-	B	572560	469470	426650	532750	731440	569280	0.93961	1.24838	0.320057	insig
mws0675	C11H15N2O8P	β-Nicotinamide mononucleotide	Nucleotides and derivatives	Nucleotides and derivatives	1094-61-7	B	250030	970870	473850	214550	124040	74499	1.17209	0.243746	-2.03655	down
pmb0776	C20H20N2O3	N-Feruloyltryptamine	Alkaloids	Phenolamine	53905-13-8	A	11837	12252	15735	1379.6	2200.3	1038.1	1.40843	0.11596	-3.1083	down
pmb0382	C19H14O6	O-Feruloyl 4-hydroxycoumarin	Lignans and Coumarins	Coumarins	-	B	1393800	669720	711470	828820	1147500	1129100	0.434406	1.11907	0.162306	insig
pme3311	C6H14O12P2	D-Fructose-1,6-biphosphate	Others	Saccharides and Alcohols	488-69-7	B	16774	37652	24710	32944	32349	36061	0.757522	1.28076	0.356997	insig
Zmyn000083	C6H14O12P2	D-Glucose 1,6-bisphosphate	Others	Saccharides and Alcohols	10139-18-1	B	6484.4	21209	18731	27691	24768	27183	0.945875	1.71552	0.778646	insig
mws1015	C15H16O9	Esculin (6,7-DihydroxyCoumarin-6-glucoside)	Lignans and Coumarins	Coumarins	531-75-9	A	1256700	367410	855400	1055400	537830	1333900	0.345102	1.18053	0.239432	insig
Zmhn001793	C15H18O9	6-O-Caffeoyl-D-glucose	Phenolic acids	Phenolic acids	-	B	15918000	11575000	16344000	11650000	9293800	12401000	0.987965	0.760654	-0.394687	insig
mws1080	C12H22O11	Galactinol	Others	Saccharides and Alcohols	3687-64-7	A	1429900	349540	459630	1047800	1290400	2055200	0.954487	1.96215	0.972438	insig
Lmsn000381	C12H22O11	D-Maltose*	Others	Saccharides and Alcohols	133-99-3	A	1143500	175250	274260	815030	768470	1427200	0.890434	1.88994	0.918344	insig
mws5038	C12H22O11	Isomaltulose*	Others	Saccharides and Alcohols	13718-94-0	A	1105300	159120	419330	910580	758570	1447600	0.866464	1.85108	0.888364	insig
mws0264	C12H22O11	D-Trehalose*	Others	Saccharides and Alcohols	99-20-7	A	661080	116820	203270	324420	426390	700200	0.696732	1.47886	0.564482	insig
pme0519	C12H22O11	D-Sucrose*	Others	Saccharides and Alcohols	57-50-1	A	605660	190810	212560	556120	606250	1065200	1.05151	2.20764	1.1425	up
mws0906	C16H22O8	Coniferin	Phenolic acids	Phenolic acids	531-29-3	B	22673000	18237000	23631000	19574000	12867000	18107000	0.924079	0.783192	-0.352562	insig
pmb2211	C19H38N2O3	Cocamidopropyl betaine	Alkaloids	Alkaloids	4292-10-8	A	16168	12673	27882	36981	37110	58968	1.23137	2.34577	1.23006	up
HJAP050	C19H21NO5	N-Feruloyl-3-methoxytyramine	Alkaloids	Phenolamine	78510-19-7	A	26347	25728	82848	9	129070	9	0.890913	0.956753	-0.0637814	insig
Lmmn000774	C15H20O9	Dihydrocaffeoylglucose	Phenolic acids	Phenolic acids	-	B	38988	52673	30415	69410	31376	75983	0.621666	1.44802	0.534086	insig
mws0609	C10H12N5O7P	Guanosine 3',5'-cyclic monophosphate	Nucleotides and derivatives	Nucleotides and derivatives	7665-99-8	A	108420	178080	293450	67850	60992	83486	1.21038	0.366114	-1.44963	down
pmb0801	C14H19NO9	4-Pyridoxic acid-O-glucoside	Others	Vitamin	-	A	43208	35788	65559	56537	51851	103740	0.792767	1.46746	0.553317	insig
Lmtn000940	C14H18O10	1-O-(3,4-Dihydroxy-5-methoxy-benzoyl)-glucoside	Phenolic acids	Phenolic acids	-	B	9277.7	3968.4	6205.9	108370	109940	121150	1.42939	17.4512	4.12525	up
pmb0981	C10H14N5O7P	Adenosine 5'-monophosphate	Nucleotides and derivatives	Nucleotides and derivatives	61-19-8	A	3101100	7579100	3578800	4889200	4131100	8375100	0.424321	1.21996	0.286833	insig
mws0874	C10H14N5O7P	3'-Adenylic Acid	Nucleotides and derivatives	Nucleotides and derivatives	84-21-9	A	17735	23069	40323	21046	20983	20637	0.527799	0.772443	-0.372499	insig
pmb1562	C21H34O4	1-Stearidonoyl-Glycerol	Lipids	Glycerol ester	-	B	3521.4	12901	15879	4144.5	6451.6	5423.2	0.692329	0.495932	-1.01179	insig
pmb0770	C20H20N2O4	N-Feruloylserotonin	Alkaloids	Phenolamine	68573-23-9	B	87314	9	9	9	9	9	0.643982	0.000309165	-11.6593	insig
Lmhp011562	C21H36O4	1-α-Linolenoyl-glycerol	Lipids	Glycerol ester	-	A	3437400	7829600	5664300	2286900	940710	1219100	1.287	0.262633	-1.92888	down
Lmhp011388	C21H36O4	2-α-Linolenoyl-glycerol	Lipids	Glycerol ester	55268-58-1	A	1447000	3596300	2610300	978920	392400	501210	1.28024	0.24466	-2.03115	down
mws0178	C16H18O9	Chlorogenic acid (3-O-Caffeoylquinic acid)*	Phenolic acids	Phenolic acids	327-97-9	A	16176	27129	11022	12928	4950.1	63905	0.0812205	1.50539	0.590133	insig
mws2108	C16H18O9	Cryptochlorogenic acid (4-O-Caffeoylquinic acid)	Phenolic acids	Phenolic acids	905-99-7	B	15100	20782	5843.2	7166.1	4448	52329	0.0584987	1.53248	0.61587	insig
mws1077	C16H18O9	Scopoletin-7-O-glucoside (Scopolin)	Lignans and Coumarins	Coumarins	531-44-2	A	43393	27320	76661	14810	9139.3	42200	0.936653	0.448853	-1.15568	insig
pme1816	C16H18O9	Neochlorogenic acid (5-O-Caffeoylquinic acid)*	Phenolic acids	Phenolic acids	906-33-2	A	19276	28148	8520.3	12161	7773.5	56752	0.0182001	1.37077	0.454981	insig
Lmhp012042	C21H38O4	2-Linoleoylglycerol	Lipids	Glycerol ester	3443-82-1	A	504830	864500	544690	204840	129370	121300	1.38024	0.237986	-2.07105	down
Lmhp112042	C21H38O4	1-Linoleoylglycerol	Lipids	Glycerol ester	2277-28-3	A	519880	867700	555620	212270	134650	135910	1.38544	0.248472	-2.00885	down
Zmhn002422	C16H20O9	1-O-Feruloyl-D-Glucose	Phenolic acids	Phenolic acids	-	A	14396000	18602000	16609000	13345000	6199900	13006000	0.984599	0.656176	-0.607846	insig
Hmmn002544	C16H20O9	Ferulic acid-4-O-glucoside	Phenolic acids	Phenolic acids	117405-51-3	A	268030	239380	393150	85275	83404	156910	1.2964	0.361541	-1.46777	down
Zmhn002334	C16H20O9	6-O-Feruloyl-D-glucose	Phenolic acids	Phenolic acids	137887-25-3	B	2723400	1760300	1617800	1400100	425170	836560	1.11818	0.436258	-1.19675	down
pmb0296	C21H40O4	1-Oleoyl-Sn-Glycerol	Lipids	Glycerol ester	129784-87-8	A	383860	499580	759230	188030	164630	95801	1.31397	0.273007	-1.87299	down
pmb3107	C15H20O10	Glucosyringic Acid	Phenolic acids	Phenolic acids	-	B	40717	29322	45952	48423	43856	90499	0.899648	1.57579	0.65608	insig
pmb0998	C10H14N5O8P	Guanosine 5'-monophosphate	Nucleotides and derivatives	Nucleotides and derivatives	85-32-5	A	100150	405720	412080	60168	59868	84534	1.17685	0.222855	-2.16582	down
mws5040	C12H21O11Na	Turanose	Others	Saccharides and Alcohols	547-25-1	B	436670	131850	245460	327580	259620	985720	0.698046	1.93238	0.95038	insig
pmb0964	C16H23N5O5	Isopentenyladenine-7-N-glucoside	Nucleotides and derivatives	Nucleotides and derivatives	-	B	39999	9503.7	23951	25616	20844	61579	0.543263	1.47084	0.556645	insig
Lmgp003270	C16H16O10	Scopoletin-7-O-glucuronide	Lignans and Coumarins	Coumarins	132752-65-9	B	413960	257540	216220	82367	99306	60516	1.35079	0.272821	-1.87397	down
pma3724	C17H20O9	1-O-Feruloylquinic acid	Phenolic acids	Phenolic acids	-	B	433530	332470	350590	137450	136080	72589	1.34747	0.309979	-1.68976	down
pmb0752	C17H20O9	3-O-Feruloylquinic acid	Phenolic acids	Phenolic acids	1899-29-2	B	704710	437310	480960	190280	143250	146390	1.3889	0.295703	-1.75778	down
Lmbp002309	C17H22O9	Sinapaldehyde-4-O-Glucoside	Phenolic acids	Phenolic acids	154461-65-1	B	19524	35337	31859	160910	88045	149900	1.36141	4.59934	2.20143	up
pmn001695	C16H20O10	Trihydroxycinnamoylquinic acid	Phenolic acids	Phenolic acids	-	B	85342	79753	71778	171110	108660	169080	1.28025	1.8949	0.92212	insig
mws0011	C17H24O9	Syringin	Phenolic acids	Phenolic acids	118-34-3	B	38911	37058	49991	186660	29046	111180	0.76452	2.59516	1.37582	insig
mws0232	C17H20N4O6	Riboflavin (Vitamin B2)	Others	Vitamin	83-88-5	A	1787500	1401700	1611200	862280	1667300	787450	0.925162	0.69099	-0.533263	insig
pme3337	C14H17N5O8	Succinyladenosine	Nucleotides and derivatives	Nucleotides and derivatives	4542-23-8	A	875960	2986100	1427500	982260	1606400	641880	0.642164	0.610739	-0.711372	insig
pme1286	C14H20N6O5S	S-(5'-Adenosy)-L-homocysteine	Amino acids and derivatives	Amino acids and derivatives	979-92-0	A	489020	432470	498290	628140	505620	434060	0.540555	1.10427	0.143093	insig
Zmhn002227	C17H22O10	4-O-Glucosyl-sinapate	Phenolic acids	Phenolic acids	-	B	6749.5	11991	18272	18931	10522	20092	0.612034	1.3386	0.420727	insig
pmb2940	C17H22O10	1-O-Glucosyl sinapate	Phenolic acids	Phenolic acids	78185-48-5	B	605070	387930	324020	360380	271890	289390	0.912447	0.699807	-0.514971	insig
HJN003	C17H22O10	1-O-Sinapoyl-D-glucose	Phenolic acids	Phenolic acids	-	B	504290	262920	241870	263690	213610	318250	0.515111	0.788391	-0.343016	insig
Lmmp010562	C24H38O4	Diisooctyl Phthalate	Phenolic acids	Phenolic acids	27554-26-3	B	346130	364660	420250	435710	225160	248800	0.745884	0.804277	-0.314235	insig
pme2735	C15H22N6O5S	S-Adenosyl-L-methionine	Amino acids and derivatives	Amino acids and derivatives	29908-03-0	B	1690400	1836800	1331400	1192600	1107100	1050200	1.27149	0.689478	-0.536423	insig
Cmjn004337	C18H26O10	Benzyl-(2''-O-xylosyl)glucoside	Phenolic acids	Phenolic acids	-	B	24865	12709	13717	54581	46129	53733	1.35273	3.01111	1.5903	up
pme3007	C9H14N2O12P2	Uridine 5'-diphosphate	Nucleotides and derivatives	Nucleotides and derivatives	27821-45-0	A	45216	112340	52290	60827	47149	33704	0.674009	0.675162	-0.566695	insig
pmd0152	C19H39O7P	LysoPA 16:0 (2n isomer)	Lipids	Glycerol ester	-	B	9	34372	9	9	9	9	0.674964	0.000785112	-10.3148	insig
pmd0153	C19H39O7P	LysoPA 16:0	Lipids	Glycerol ester	22002-85-3	B	9	26993	9	10555	5548.9	9082.8	0.858958	0.932461	-0.100885	insig
Lmbp003668	C20H18O10	Kaempferol-3-O-arabinoside	Flavonoids	Flavonoid	-	B	1480300	2128100	1318200	34838	231450	23901	1.3242	0.0589025	-4.08553	down
pmn001663	C22H26O8	Syringaresinol	Lignans and Coumarins	Lignans	21453-69-0	B	1811.5	608.86	3052.9	1399.3	982.26	2047.1	0.0601034	0.809145	-0.30553	insig
mws2523	C12H23O14P	Trehalose 6-phosphate	Others	Saccharides and Alcohols	4484-88-2	B	8076.9	7899.6	8413.4	6087.5	7927.5	6000.7	1.06087	0.820655	-0.285152	insig
Lmhp008337	C19H40NO7P	LysoPE 14:0(2n isomer)	Lipids	LPE	-	B	13347	44099	19165	9543.7	2923.6	3144.1	1.22564	0.203775	-2.29495	down
pmb0864	C19H40NO7P	LysoPE 14:0	Lipids	LPE	-	B	56088	233240	96071	40734	13343	10102	1.21611	0.166526	-2.58618	down
pme2117	C10H15N5O10P2	Adenosine 5'-diphosphate	Nucleotides and derivatives	Nucleotides and derivatives	58-64-0	A	157590	280020	215470	267860	160540	217850	0.0369686	0.989542	-0.0151674	insig
mws0919	C21H20O10	Kaempferol-3-O-rhamnoside (Afzelin)	Flavonoids	Flavonols	482-39-3	A	37332	63849	52065	9	14293	2277.1	1.00715	0.108186	-3.20841	down
pme0321	C21H20O10	Kaempferol-7-O-rhamnoside	Flavonoids	Flavonols	20196-89-8	B	33407	32975	26933	2351.2	12535	2499.6	1.26023	0.186313	-2.4242	down
Lmtn002324	C19H28O11	Benzyl-(2''-O-glucosyl)glucoside	Phenolic acids	Phenolic acids	-	B	18663	6274.2	17638	23131	21940	15929	0.782406	1.43276	0.518796	insig
mws2186	C20H18O11	Avicularin(Quercetin-3-O-α-L-arabinofuranoside)	Flavonoids	Flavonols	572-30-5	A	6415.3	4114.6	363.97	326780	666670	272340	1.35602	116.193	6.86038	up
Lmdp003509	C20H18O11	Quercetin-3-O-xyloside (Reynoutrin)	Flavonoids	Flavonols	549-32-6	B	8058.6	7802.2	4769.7	419060	943140	416500	1.43171	86.217	6.4299	up
HJN087	C21H22O10	Naringenin-4'-O-glucoside	Flavonoids	Flavonoid	-	B	29319	79112	43822	26592	38437	22401	0.879843	0.574242	-0.80027	insig
mws1179	C21H22O10	Naringenin-7-O-glucoside (Prunin)	Flavonoids	Dihydroflavone	529-55-5	B	37819	39932	23079	25834	19291	26624	0.927307	0.711584	-0.490894	insig
HJN055	C21H24O10	Dihydrocharcone-4'-O-glucoside	Flavonoids	Chalcones	-	A	617940	521230	640300	326840	359760	394930	1.36525	0.607782	-0.718374	insig
mws2118	C21H24O10	Phloretin-2'-O-glucoside (Phlorizin)	Flavonoids	Chalcones	60-81-1	A	314010	258980	351180	189780	181830	176100	1.35153	0.592651	-0.754746	insig
Lmhp008440	C20H40NO7P	LysoPE 15:1	Lipids	LPE	-	A	2219.3	9963.5	5030.8	1910.6	9	9	1.12187	0.112039	-3.15792	down
Lmhp008273	C20H40NO7P	LysoPE 15:1(2n isomer)	Lipids	LPE	-	B	706.12	2973.4	927.71	9	9	9	1.42914	0.00586035	-7.4148	down
Lmlp003024	C20H30O7N4	N'-p-Coumaroylagmatine-glucoside	Alkaloids	Phenolamine	-	B	84348	76584	160070	10420	9	9	1.19536	0.0325169	-4.94267	down
Lmhp009187	C20H42NO7P	LysoPE 15:0	Lipids	LPE	-	A	41224	113640	70903	19567	11683	8179.7	1.3234	0.174648	-2.51748	down
Lmhp008885	C20H42NO7P	LysoPE 15:0(2n isomer)	Lipids	LPE	-	A	7691	20299	14066	5008	2172	1664.7	1.27295	0.210308	-2.24943	down
pme1014	C31H40O2	Menatetrenone (Vitamin K2)	Others	Vitamin	11032-49-8	B	46280	48587	48375	49916	70458	53101	0.940819	1.21106	0.276273	insig
Lmhp007836	C21H38NO7P	LysoPE 16:3	Lipids	LPE	-	A	26683	56733	42348	33180	14830	7627.5	1.01599	0.442396	-1.17659	down
Hmcp002316	C21H20O11	Isorhamnetin-3-O-arabinoside	Flavonoids	Flavonols	-	A	48149	67177	68961	160740	912930	108090	1.06829	6.41261	2.68091	up
mws2209	C21H20O11	Kaempferol-3-O-glucoside (Astragalin)	Flavonoids	Flavonols	480-10-4	B	6709400	10585000	12832000	838540	1912000	536930	1.35406	0.109123	-3.19598	down
Xmyp005654	C21H20O11	Kaempferol-4'-O-glucoside	Flavonoids	Flavonoid	-	A	1424900	1936300	1169100	456850	2443100	407300	0.686928	0.730029	-0.453974	insig
mws0045	C21H20O11	Quercetin-3-O-rhamnoside(Quercitrin)	Flavonoids	Flavonols	522-12-3	B	9	9	9	41896	60604	29571	1.446	4891.52	12.2561	up
Hmpp003270	C21H20O11	Luteolin-4'-O-glucoside	Flavonoids	Flavonoid	6920-38-3	A	9270900	12800000	11176000	889790	2204300	657530	1.37181	0.112841	-3.14763	down
mws0913	C21H20O11	Kaempferol-3-O-galactoside (Trifolin)	Flavonoids	Flavonols	23627-87-4	B	13955	30359	21714	50685	164900	54817	1.19938	4.09526	2.03396	up
Lmlp003531	C21H20O11	Luteolin-3'-O-glucoside	Flavonoids	Flavonoid	5154-41-6	A	7955800	11524000	12408000	744970	1873300	613250	1.37696	0.10134	-3.30272	down
pme2459	C21H20O11	Luteolin-7-O-glucoside (Cynaroside)	Flavonoids	Flavonoid	5373-11-5	A	4450000	3165000	2633900	1067100	4062800	1148700	0.841022	0.612612	-0.706954	insig
HJN086	C21H22O11	Eriodictyol-3'-O-glucoside	Flavonoids	Dihydroflavone	-	B	9	9	1542.6	30650	6638.7	23886	1.24673	39.1995	5.29276	up
Lmtn002796	C21H22O11	Aromadendrin-7-O-glucoside	Flavonoids	Flavonoid	28189-90-4	B	603880	535660	550250	80780	94139	86709	1.44319	0.154829	-2.69126	down
mws0057	C21H22O11	Eriodictyol-7-O-glucoside	Flavonoids	Dihydroflavone	38965-51-4	B	98693	56940	74542	17962	79544	35861	0.865978	0.579416	-0.787329	insig
Lmmn004625	C21H22O11	Dihydrokaempferol-7-O-glucoside	Flavonoids	Flavonols	-	B	40412	36211	23649	9	9	9	1.44655	0.000269268	-11.8587	down
Lmhp008763	C21H42NO7P	LysoPE 16:1(2n isomer)	Lipids	LPE	-	A	34661	65767	48455	39547	50227	10785	0.671387	0.675423	-0.566137	insig
Lmhp009034	C21H42NO7P	LysoPE 16:1	Lipids	LPE	-	A	108180	331840	147740	91117	73391	24138	1.0723	0.320958	-1.63955	down
HJN041	C21H24O11	Epicatechin glucoside	Flavonoids	Flavanols	-	B	13738	11079	6694.9	7648.5	11300	9222.1	0.256271	0.893967	-0.161706	insig
pmd0160	C21H44NO7P	LysoPE 16:0(2n isomer)	Lipids	LPE	-	A	1236400	4181300	2122200	924940	288270	297060	1.22939	0.200304	-2.31974	down
pmb0876	C21H44NO7P	LysoPE 16:0	Lipids	LPE	53862-35-4	A	5161700	19769000	10975000	3833400	1268900	1263400	1.23705	0.177289	-2.49582	down
Lmhp005872	C25H30N2O6	Diferuloylcadaverine	Alkaloids	Phenolamine	-	B	9	9	9	2599.3	20350	5720.5	1.42552	1061.84	10.0524	up
mws4053	C30H48O3	Ursolic acid	Terpenoids	Triterpene	77-52-1	B	8968.1	10004	8397.9	8939	8101	9370	0.403762	0.964925	-0.0515111	insig
pmb2654	C19H27NO12	Anthranilate-1-O-Sophoroside	Phenolic acids	Phenolic acids	-	B	189340	43215	63127	152810	195730	481090	1.01427	2.80582	1.48842	up
Lmzn001894	C21H18O12	Kaempferol-3-O-glucuronide	Flavonoids	Flavonols	22688-78-4	A	5085600	4329600	5181000	387310	606790	416200	1.43182	0.096621	-3.37152	down
mws4167	C21H18O12	Luteolin-7-O-glucuronide	Flavonoids	Flavonoid	29741-10-4	A	17339000	16565000	15231000	1368600	1799200	1457700	1.44218	0.0941386	-3.40907	down
Lmmp003767	C21H18O12	Kaempferol-7-O-glucuronide	Flavonoids	Flavonols	-	B	22636000	22412000	31812000	9989500	13857000	10204000	1.33881	0.44302	-1.17456	down
Hmcp002539	C22H22O11	Isorhamnetin-3-O-rhamnoside	Flavonoids	Flavonols	-	B	7624.3	10076	18094	43338	157260	17147	1.07391	6.08323	2.60484	up
pmp000579	C22H22O11	Diosmetin-7-O-galactoside	Flavonoids	Flavonoid	-	A	228990	218570	231980	245190	300170	413350	1.04065	1.41082	0.496536	insig
mws1329	C21H20O12	Quercetin-7-O-glucoside*	Flavonoids	Flavonols	491-50-9	A	18287	19521	13370	291680	553570	428160	1.43179	24.882	4.63703	up
mws0091	C21H20O12	Quercetin-3-O-glucoside (Isoquercitrin)*	Flavonoids	Flavonols	482-35-9	A	47499	24988	31777	623740	1055900	621530	1.43097	22.0706	4.46405	up
mws0061	C21H20O12	Quercetin-3-O-galactoside (Hyperin)	Flavonoids	Flavonols	482-36-0	A	67859	45321	56894	827570	1998500	1184300	1.42695	23.5801	4.5595	up
Lmdp003286	C21H20O12	Isohyperoside	Flavonoids	Flavonols	35589-21-0	A	847470	972240	892050	4447700	7794200	5550300	1.42448	6.56113	2.71394	up
Lmzp002365	C22H24O11	Hesperetin-7-O-glucoside	Flavonoids	Flavonoid	31712-49-9	B	103680	42212	76506	511460	612580	445710	1.40192	7.05829	2.81932	up
pme1598	C22H24O11	Hesperetin-5-O-glucoside	Flavonoids	Dihydroflavonol	69651-80-5	B	36217	24931	26674	530540	968680	664790	1.43625	24.6409	4.62298	up
Lmhp009464	C22H44NO7P	LysoPE 17:1(2n isomer)	Lipids	LPE	-	A	17111	61212	35163	11667	5341.7	4331.8	1.25587	0.188045	-2.41085	down
Lmhp009769	C22H44NO7P	LysoPE 17:1	Lipids	LPE	-	A	18614	63149	32045	13811	5006.4	4678.9	1.23281	0.206456	-2.2761	down
Xmsn002700	C21H22O12	Taxifolin-3'-O-glucoside	Flavonoids	Flavonoid	31106-05-5	B	9	9	9	15412	21215	14548	1.44662	1895.37	10.8883	up
pmd0130	C22H46NO7P	LysoPC 14:0	Lipids	LPC	20559-16-4	A	35273	65416	38841	29488	16562	8081.2	1.1266	0.387954	-1.36604	down
Zmhn002508	C21H28O12	4-p-Cumaroyl-rhamnosyl-(1→6)-D-glucose	Phenolic acids	Phenolic acids	-	B	9	9	9	9058.8	26787	16791	1.4423	1949.51	10.9289	up
Lmsn012425	C30H48O4	Rubusic acid (3β,7α-Dihydroxyolean-12-en-28-oic acid)	Terpenoids	Triterpene	23984-26-1	A	5002.5	25951	21727	1991.1	679.05	1190.7	1.3049	0.073288	-3.77028	down
pmb1912	C20H23N7O7	10-Formyltetrahydrofuran	Alkaloids	Alkaloids	2800-34-2	B	143940	92239	145270	110790	110060	94447	0.65772	0.826577	-0.274779	insig
Lmhp008233	C23H40NO7P	LysoPE 18:4	Lipids	LPE	-	A	3035.4	7087.9	4909.7	2976.4	1240.7	966.08	1.16406	0.344787	-1.53622	down
Lmhp008589	C23H42NO7P	LysoPE 18:3(2n isomer)	Lipids	LPE	-	A	2121900	6996300	4204200	3428900	2714900	1005700	0.761578	0.536653	-0.89794	insig
Lmhp008801	C23H42NO7P	LysoPE 18:3	Lipids	LPE	-	A	1967200	6253700	2760600	2318500	1232300	683050	1.01318	0.385544	-1.37503	down
pmp000583	C22H20O12	Diosmetin-7-O-glucuronide	Flavonoids	Flavonoid	35110-20-4	B	1486300	2884200	1679400	936910	1392900	269660	0.985866	0.429672	-1.21869	insig
pmb0874	C23H44NO7P	LysoPE 18:2(2n isomer)	Lipids	LPE	-	A	11036000	31849000	20624000	12314000	9429700	3150100	1.00014	0.391973	-1.35117	down
pmb0881	C23H44NO7P	LysoPE 18:2	Lipids	LPE	-	A	6543400	17049000	8785200	5814700	3138800	1545200	1.13039	0.324258	-1.62479	down
Lmmp003783	C21H18O13	Quercetin-3-O-glucuronide	Flavonoids	Flavonols	22688-79-5	B	110810	36439	90207	3355000	5389100	4274100	1.42909	54.8236	5.77673	up
Lmfn003760	C21H18O13	Quercetin-4′-O-glucuronide	Flavonoids	Flavonols	201463-36-7	A	484820	422690	396430	2503900	2644300	2027100	1.4381	5.50278	2.46016	up
Hmjp003123	C21H18O13	Quercetin-5-O-glucuronide	Flavonoids	Flavonols	-	B	1245100	863580	890610	7848600	6085900	5736600	1.42965	6.55859	2.71338	up
Zmhn004909	C21H18O13	3,4-Digalloylshikimic acid	Phenolic acids	Phenolic acids	-	B	13789	13883	15731	96778	85690	68971	1.43872	5.79312	2.53434	up
Lmjp003044	C22H22O12	Isorhamnetin-3-O-Glucoside*	Flavonoids	Flavonols	5041-82-7	A	433840	408880	423280	1548900	7953100	1102300	1.19353	8.37622	3.0663	up
Hmcp002207	C22H22O12	Isorhamnetin-7-O-glucoside (Brassicin)*	Flavonoids	Flavonols	6743-96-0	A	458300	380010	403490	1449400	8622200	1106000	1.17717	9.00113	3.17011	up
Lmnn002886	C23H26O11	1'-O-(3,4-Dihydroxyphenethyl)-O-caffeoyl-glucoside	Phenolic acids	Phenolic acids	-	B	3654400	3309100	3588700	20775000	22972000	17247000	1.44215	5.78022	2.53112	up
pmb2260	C23H46NO7P	LysoPC 15:1	Lipids	LPC	-	A	7239.5	26033	10985	4422.7	3193.8	2149.6	1.24236	0.220665	-2.18007	down
mws0289	C23H46NO7P	LysoPE 18:1	Lipids	LPE	89576-29-4	A	1217600	2661400	2137500	1343700	645730	644750	1.13162	0.437826	-1.19157	down
pmb0856	C23H46NO7P	LysoPE 18:1(2n isomer)	Lipids	LPE	-	A	1094700	2572200	2989000	1620600	1027200	776810	0.914854	0.514522	-0.958694	insig
pmb0883	C23H48NO7P	LysoPE 18:0	Lipids	LPE	69747-55-3	A	24472	89637	44725	18207	8694.3	7038.2	1.22917	0.213679	-2.22648	down
pmb2319	C23H48NO7P	LysoPC 15:0	Lipids	LPC	108273-89-8	A	87974	179680	119830	46934	43338	29143	1.32778	0.30818	-1.69815	down
pmb0880	C23H48NO7P	LysoPE 18:0(2n isomer)	Lipids	LPE	-	A	15746	34022	28745	16506	8009.1	7614.3	1.15899	0.409224	-1.28904	down
Lmhp009129	C23H48NO7P	LysoPC 15:0(2n isomer)	Lipids	LPC	-	A	23640	35513	27864	10104	14396	7796.6	1.33096	0.371153	-1.42991	down
pmb3072	C22H26O12	3-O-p-Coumaroylshikimic acid-O-glucoside	Phenolic acids	Phenolic acids	-	B	34816	19969	21809	16307	18117	18575	0.995054	0.691947	-0.531266	insig
Hmyn007168	C22H45O9P	LysoPG 16:0	Lipids	Glycerol ester	-	B	2631800	6802300	6049800	3268800	3008700	1779500	0.939389	0.520347	-0.942454	insig
pmn001707	C30H46O5	Quillaic acid	Phenolic acids	Phenolic acids	631-01-6	B	1157500	1313400	2235100	709650	606650	278150	1.20806	0.338812	-1.56144	down
Lmmn003398	C23H22O12	Kaempferol-3-O-(6''-acetyl)glucoside	Flavonoids	Flavonols	-	B	132720	115150	96282	3835.4	122270	6774.5	0.987449	0.386108	-1.37292	insig
pma1303	C24H46NO7P	LysoPC 16:2	Lipids	LPC	-	A	85740	207210	126780	83328	36913	35554	1.16615	0.371179	-1.42981	down
pmb0863	C24H46NO7P	LysoPC 16:2(2n isomer)	Lipids	LPC	-	A	30273	77254	32368	35483	26309	11034	0.851252	0.520576	-0.941819	insig
pmp001270	C24H48NO7P	LysoPC 16:1	Lipids	LPC	76790-27-7	A	298370	707400	322100	227860	252030	116410	1.05583	0.449065	-1.155	down
Lmhp008833	C24H48NO7P	LysoPC 16:1(2n isomer)	Lipids	LPC	-	A	217770	543720	289760	223980	295020	73285	0.783759	0.56341	-0.827742	insig
HJN054	C25H34O10	Secoisolariciresinol-9'-O-xyloside	Lignans and Coumarins	Lignans	-	B	70150	79589	100560	143310	51277	280370	0.556462	1.89756	0.924144	insig
pmb0855	C24H50NO7P	LysoPC 16:0	Lipids	LPC	17364-16-8	A	16464000	42906000	23244000	10954000	7244000	6721400	1.27285	0.301637	-1.72912	down
pmd0132	C24H50NO7P	LysoPC 16:0(2n isomer)	Lipids	LPC	-	A	2832800	6696400	3789300	2004700	1185400	1080600	1.26442	0.320659	-1.64089	down
Lmhp010040	C25H46NO7P	LysoPE 20:3	Lipids	LPE	-	A	10230	41778	16327	9047.9	3430.3	2673.9	1.16473	0.221733	-2.17311	down
Lmhp009802	C25H46NO7P	LysoPE 20:3(2n isomer)	Lipids	LPE	-	A	9820.9	45046	16330	10295	4445.9	2541.3	1.09481	0.242738	-2.04253	down
HJAP135	C24H24O12	Pinocembrin-7-O-(6''-O-malonyl)glucoside	Flavonoids	Flavonoid	-	A	3318300	2226000	2306100	478060	2302900	634510	1.0436	0.43507	-1.20068	down
Lmsn009589	C30H48O6	2α,3β,19α,23-Tetrahydroxyurs-12-en-28-oic acid	Terpenoids	Triterpene	-	B	1452.1	1603.8	1420.4	1659	3013.1	662.43	0.0175677	1.19173	0.253054	insig
Lmhp010514	C25H48NO7P	LysoPE 20:2(2n isomer)	Lipids	LPE	-	A	7661.7	32325	11652	10075	3555.5	2382.5	1.01602	0.310097	-1.68921	down
Lmhp008718	C25H48NO7P	LysoPC 17:2	Lipids	LPC	-	A	32236	129640	46123	22672	21267	6269.3	1.10492	0.241387	-2.05058	down
Lmhp010757	C25H48NO7P	LysoPE 20:2	Lipids	LPE	-	A	19265	109890	36410	20163	4987.4	5804.2	1.12592	0.186963	-2.41917	down
Hmln002199	C23H22O13	Quercetin-3-O-(6''-acetyl)galactoside	Flavonoids	Flavonols	-	B	2966.2	1853.9	9	7365.7	67638	5893.7	0.960057	16.7521	4.06627	insig
Lmhp009590	C25H50NO7P	LysoPC 17:1	Lipids	LPC	-	A	36866	95585	50845	26757	18980	12836	1.22762	0.319554	-1.64587	down
Lmhp010515	C25H52NO7P	LysoPC 17:0(2n isomer)	Lipids	LPC	-	A	22348	38881	30843	10896	17716	8369.7	1.24815	0.401661	-1.31595	down
pmb2406	C25H52NO7P	LysoPC 17:0	Lipids	LPC	50930-23-9	A	14059	23413	19249	6263.4	10984	3784.3	1.21141	0.370792	-1.43132	down
Lmhp009526	C27H46O9	2-α-Linolenoyl-glycerol-1-O-glucoside	Lipids	Glycerol ester	-	A	94485	117980	178600	63471	91147	33114	1.05877	0.480053	-1.05873	down
Lmhp009773	C27H46O9	1-α-Linolenoyl-glycerol-3-O-glucoside	Lipids	Glycerol ester	-	A	170740	325770	197380	157590	58032	57857	1.15671	0.394124	-1.34328	down
Hmqp006235	C26H46NO7P	LysoPC 18:4	Lipids	LPC	-	A	9839.4	32709	11356	9439.5	12634	4238.6	0.804365	0.488125	-1.03468	insig
Zmhn000785	C19H32O16	Di-O-Glucosylquinic acid	Phenolic acids	Phenolic acids	-	A	227210	66908	146330	103250	176140	145900	0.132946	0.965585	-0.0505248	insig
Lmhp010334	C27H48O9	2-Linoleoylglycerol-1-O-glucoside	Lipids	Glycerol ester	-	A	2142.4	7624	6582.3	1761.6	1955.3	1087.6	1.13657	0.293877	-1.76672	down
Lmhp010573	C27H48O9	1-Linoleoylglycerol-3-O-glucoside	Lipids	Glycerol ester	-	A	4232.2	15247	7737	3363.3	418.57	1526.2	1.15148	0.195033	-2.35821	down
pmb0865	C26H48NO7P	LysoPC 18:3(2n isomer)	Lipids	LPC	-	A	10737000	22890000	11637000	10622000	8292000	5050500	1.00843	0.529438	-0.917465	insig
pmb0854	C26H48NO7P	LysoPC 18:3	Lipids	LPC	-	A	10568000	24512000	11599000	10527000	8125500	5197500	1.0051	0.510936	-0.968784	insig
Hmbn002692	C22H30O14	6'-O-Feruloyl-D-sucrose	Phenolic acids	Phenolic acids	118230-77-6	B	1051500	592530	527920	280350	204800	363650	1.25422	0.390801	-1.35549	down
pmp001251	C26H50NO7P	LysoPC 18:2(2n isomer)	Lipids	LPC	-	A	1395900	4967200	2105300	1354900	1158600	392980	1.01491	0.343215	-1.54282	down
pmp001273	C26H50NO7P	LysoPC 18:2	Lipids	LPC	-	A	1001200	2507300	1139900	751490	542450	328270	1.17462	0.348982	-1.51877	down
Li512111	C24H24O13	Isorhamnetin-3-O-(6''-acetylglucoside)	Flavonoids	Flavonols	-	B	2588.5	9	9	9	30461	9	0.194077	11.6935	3.54763	insig
Lmhp010190	C26H52NO7P	LysoPC 18:1(2n isomer)	Lipids	LPC	-	A	16024000	44715000	28779000	24186000	15600000	8544200	0.856091	0.539894	-0.889253	insig
pmp001281	C26H52NO7P	LysoPC 18:1	Lipids	LPC	-	A	8291800	17791000	10832000	10902000	5918500	4901000	0.927314	0.588423	-0.765076	insig
mws0126	C26H54NO7P	LysoPC 18:0	Lipids	LPC	19420-57-6	A	272160	780920	422500	211780	159070	150460	1.21012	0.353292	-1.50107	down
pmd0136	C26H54NO7P	LysoPC 18:0(2n isomer)	Lipids	LPC	-	A	34820	72905	38227	47990	23168	29851	0.735445	0.69207	-0.53101	insig
Lmhp007840	C27H52NO7P	LysoPC 19:2	Lipids	LPC	-	A	6838.4	33061	21970	9621.4	5294	2733.3	1.02455	0.285257	-1.80966	down
Lmhp007598	C27H52NO7P	LysoPC 19:2(2n isomer)	Lipids	LPC	-	A	7641.1	16407	18184	4825.7	8797.4	6472.4	1.06225	0.475835	-1.07147	down
pmp000587	C24H22O14	Luteolin-7-O-(6''-malonyl)glucoside	Flavonoids	Flavonoid	-	A	17920	11612	24509	9	9	9	1.44243	0.000499621	-10.9669	down
Lmdp004892	C24H22O14	Kaempferol-3-O-(6''-malonyl)galactoside	Flavonoids	Flavonols	-	A	2022500	2663000	3069300	28795	1320900	42974	1.12308	0.179588	-2.47724	down
Lmhp010908	C27H54NO7P	LysoPC 19:1	Lipids	LPC	-	A	8736.6	41794	16351	11129	8141.8	6167.7	0.926357	0.380351	-1.3946	insig
Zmfn000481	C14H22N2O16P2	Uridine-5'-Diphosphate-D-Xylose	Nucleotides and derivatives	Nucleotides and derivatives	3616-06-6	B	344950	487600	286510	246100	290670	153310	1.02703	0.61666	-0.697452	insig
pmb0824	C25H28O13	Syringic acid-4-O-(6''-feruloyl)glucoside	Phenolic acids	Phenolic acids	-	B	35030	34288	44227	39160	10231	20347	0.898187	0.614188	-0.703247	insig
pmb2228	C27H56NO7P	LysoPC 19:0	Lipids	LPC	108273-88-7	A	6144.6	5358.5	4290.2	4998.7	5552.8	3309.7	0.506577	0.877663	-0.18826	insig
Lmdn001925	C26H34O12	Olivil-4'-O-glucoside	Lignans and Coumarins	Lignans	76880-93-8	B	99834	95267	79423	80883	77476	90247	0.751716	0.905589	-0.143071	insig
pmp001282	C28H50NO7P	Propyl 2-(trimethylammonio)ethyl phosphate	Others	Others	-	A	811950	1791900	1008000	998790	584130	485590	0.952128	0.572701	-0.804146	insig
Lmhp009890	C28H52NO7P	LysoPC 20:3	Lipids	LPC	1199257-41-4	A	34876	101590	43636	51295	22669	27804	0.800139	0.565058	-0.82353	insig
pmd0147	C28H54NO7P	LysoPC 20:2	Lipids	LPC	-	A	78856	292860	117180	129320	53511	79046	0.741629	0.53565	-0.900638	insig
pmd0146	C28H54NO7P	LysoPC 20:2(2n isomer)	Lipids	LPC	-	A	24436	91141	32121	68548	20125	25928	0.32	0.775914	-0.366031	insig
pmb0608	C25H24O14	Chrysoeriol-7-O-(6''-malonyl)glucoside	Flavonoids	Flavonoid	-	A	102480	48679	87248	7539.2	76762	15857	0.948367	0.420114	-1.25115	insig
Lmhp011549	C28H56NO7P	LysoPC 20:1	Lipids	LPC	-	A	18088	67089	31659	20589	11996	13869	1.02646	0.3976	-1.33061	down
Hmln002189	C24H22O15	Quercetin-3-O-(6''-malonyl)galactoside	Flavonoids	Flavonols	-	A	9	9	9	18505	196880	13633	1.42134	8482.15	13.0502	up
mws1138	C24H26N2O13	Betanin (Betanidin-5-O-glucoside)	Alkaloids	Alkaloids	7659-95-2	B	2526.2	5640.2	3031.5	14514	131880	22748	1.23106	15.1048	3.91693	up
Rfmb25702	C28H34O12	Pinoresinol-4-O-(6''-acetyl)glucoside	Lignans and Coumarins	Lignans	-	B	69866	77697	134320	12264	47544	7926	1.18001	0.240291	-2.05714	down
HJAP064	C25H24O15	Isorhamnetin-3-O-(6''-malonylglucoside)	Flavonoids	Flavonoid	-	B	18891	10648	14363	18145	332030	34330	0.912625	8.75826	3.13064	insig
pmb2922	C15H24N2O17P2	Uridine 5'-diphospho-D-glucose	Nucleotides and derivatives	Nucleotides and derivatives	133-89-1	A	1522700	1610400	1428500	1903400	1626800	1345100	0.379745	1.06877	0.0959511	insig
Lmmp003306	C25H26O15	Quercetin-3-O-xylosyl(1→2)arabinoside	Flavonoids	Flavonols	-	A	32109	32363	36613	1452400	1039500	1271300	1.44432	37.2281	5.21832	up
Zmxp005470	C26H26O15	Tricin-7-O-(6''-O-malonyl)glucoside	Flavonoids	Flavonoid	-	B	9	9	9	7089.2	4198.4	20910	1.43049	1192.5	10.2198	up
mws0047	C27H30O14	Apigenin-7-O-neohesperidoside (Rhoifolin)	Flavonoids	Flavonoid	17306-46-6	B	35303	50194	37921	17405	45029	19214	0.884624	0.661557	-0.596063	insig
Lmnp002741	C27H30O14	Genkwanin-6-C-(2''-O-apiosyl)glucoside	Flavonoids	Flavonoid carbonoside	-	B	9	9	9	18935	24944	18109	1.44674	2295.85	11.1648	up
HJAP148	C26H28O15	Kaempferol-3-O-sambubioside	Flavonoids	Flavonoid	27661-51-4	A	17980000	15097000	15332000	978140	904230	1788500	1.42918	0.0758303	-3.72108	down
pmb0492	C34H37N3O6	N',N'',N'''-p-Coumaroyl-cinnamoyl-caffeoyl spermidine	Alkaloids	Phenolamine	-	B	88056	250620	238820	79690	98413	52834	1.06529	0.399894	-1.32231	down
Hmgp003641	C28H32O14	Chrysoeriol-6-C-rhamnoside-7-O-rhamnoside	Flavonoids	Flavonoid	-	B	12988	11137	16137	57564	42199	100020	1.362	4.96207	2.31094	up
pmp001288	C28H32O14	Acacetin-7-O-rutinoside (Linarin)	Flavonoids	Flavonoid	480-36-4	A	442270	364960	454500	1925200	1319900	3379700	1.35964	5.25057	2.39247	up
mws1290	C30H26O13	Kaempferol-3-O-(6''-p-Coumaroyl)glucoside (Tiliroside)	Flavonoids	Flavonols	20316-62-5	B	9	9	9	86115	13976	109650	1.42803	7768.19	12.9234	up
Hmjn004446	C30H26O13	Luteolin-7-O-(6''-caffeoyl)rhamnoside	Flavonoids	Flavonoid	-	B	596500	622230	914860	43052	150390	73694	1.35784	0.125205	-2.99764	down
Lmsp004670	C27H30O15	Kaempferol-3-O-glucoside-7-O-rhamnoside	Flavonoids	Flavonols	-	A	2012700	1668700	1729600	623410	969740	781200	1.36838	0.438801	-1.18836	down
pmp001079	C27H30O15	Luteolin-7-O-neohesperidoside (Lonicerin)*	Flavonoids	Flavonoid	25694-72-8	A	221730	133500	102020	53170	156040	48280	0.871573	0.563127	-0.828467	insig
pmp000593	C27H30O15	Luteolin-7-O-rutinoside*	Flavonoids	Flavonoid	3563-98-2	A	2079900	1538300	1407800	647920	1807900	522660	0.91167	0.592614	-0.754834	insig
Lmjp002867	C27H30O15	Kaempferol-3-O-neohesperidoside*	Flavonoids	Flavonols	32602-81-6	A	1708900	1465900	1939100	710610	1014700	856510	1.34228	0.504863	-0.986036	insig
Lmsn002815	C27H30O15	Kaempferol-3-O-rutinoside(Nicotiflorin)*	Flavonoids	Flavonoid	17650-84-9	A	3995000	4965400	5280600	1365500	2090200	2504400	1.32421	0.418517	-1.25664	down
Zmcp003989	C27H30O15	Kaempferol-3-O-rhamnosyl(1→2)glucoside	Flavonoids	Flavonoid	-	A	1001900	1309500	938900	44181	67839	34199	1.43184	0.0449863	-4.47437	down
Lmjp002596	C26H28O16	Quercetin-3-O-sambubioside	Flavonoids	Flavonols	83048-35-5	A	12071	26853	28696	1083400	1837200	1204200	1.43066	60.9997	5.93073	up
Lmtp004044	C26H28O16	Quercetin-3-O-apiosyl(1→2)galactoside	Flavonoids	Flavonols	-	B	486360	520990	577600	29638000	33497000	24475000	1.44616	55.2762	5.78859	up
Lmqn000780	C17H27N3O17P2	Uridine 5'-diphospho-N-acetylglucosamine	Alkaloids	Alkaloids	528-04-1	B	28248	28182	21294	30590	32579	24119	0.581301	1.12305	0.167423	insig
Hmjp003008	C27H28O16	Luteolin-7-O-glucuronide-5-O-rhamnoside	Flavonoids	Flavonoid	-	A	13013000	19432000	18961000	1885300	2808600	2007200	1.42376	0.130356	-2.93947	down
pmp001080	C28H32O15	Diosmetin-7-O-Neohesperidoside (Neodiosmin)	Flavonoids	Flavonoid	38665-01-9	B	123100	204460	153660	35565	69047	30785	1.32226	0.281362	-1.8295	down
Lmmp003091	C27H30O16	Quercetin-3-O-(4''-O-glucosyl)rhamnoside	Flavonoids	Flavonols	59262-54-3	B	5008.5	8681.6	7796	80259	195980	123660	1.41538	18.612	4.21816	up
Lmsp004166	C27H30O16	Quercetin-3-O-glucoside-7-O-rhamnoside	Flavonoids	Flavonols	-	B	51296	36388	60012	2766200	3670500	3090400	1.44488	64.5048	6.01133	up
mws0059	C27H30O16	Quercetin-3-O-rutinoside (Rutin)	Flavonoids	Flavonols	153-18-4	A	22462	18558	27701	1200600	1268100	1256900	1.44628	54.2134	5.76058	up
Lmbp002336	C27H30O16	Quercetin-3-O-(2''-O-rhamnosyl)galactoside	Flavonoids	Flavonols	-	B	162950	111300	179410	8316000	9330300	9045200	1.44534	58.8359	5.87863	up
Lmjp002461	C27H30O16	Quercetin-3-O-neohesperidoside	Flavonoids	Flavonols	117611-67-3	A	57211	41762	55138	2722000	3642500	2801800	1.44571	59.4786	5.8943	up
Lmyn001269	C27H30O16	Kaempferol-3-O-sophoroside	Flavonoids	Flavonoid	19895-95-5	B	516810	653180	369670	1157500	1102400	903600	1.28848	2.05467	1.03891	up
mws4134	C20H32N6O12S2	Oxiglutatione	Amino acids and derivatives	Amino acids and derivatives	27025-41-8	A	1360700	1245000	1714500	1917400	1664000	1613900	0.975231	1.20256	0.266109	insig
Rfmb26201	C30H38O14	Syringaresinol-4'-O-(6''-acetyl)glucoside	Lignans and Coumarins	Lignans	-	B	75200	35905	75406	6616.5	17996	11102	1.30703	0.191487	-2.38468	down
Hmjp002999	C28H32O16	Isorhamnetin-3-O-rutinoside (Narcissin)	Flavonoids	Flavonoid	604-80-8	B	45029	108530	78898	1580000	5634500	1140200	1.37878	35.9408	5.16755	up
Zmxp002867	C28H32O16	Chrysoeriol-5,7-di-O-glucoside	Flavonoids	Flavonoid	-	B	31899	15636	58263	78538	88684	191810	1.17368	3.39356	1.7628	up
Lmsp004045	C28H32O16	Isorhamnetin-3-O-glucoside-7-O-rhamnoside	Flavonoids	Flavonols	-	A	1581.8	5311	4198.5	11578	30163	8430	1.17633	4.52346	2.17743	up
pme1540	C28H32O16	Isorhamnetin-3-O-neohesperidoside	Flavonoids	Flavonols	55033-90-4	A	5808.8	4753.5	2077.5	20545	49565	12666	1.26076	6.54884	2.71124	up
Hmln002149	C29H36O15	Acteoside	Phenolic acids	Phenolic acids	61276-17-3	B	9	9	11479	5794.1	4438.3	9217.5	0.967303	1.69174	0.758505	insig
pmp000596	C27H30O17	Quercetin-3-O-(2''-O-galactosyl)glucoside	Flavonoids	Flavonols	56782-99-1	A	17268	14800	26272	32368	9	36739	0.53871	1.18471	0.244534	insig
Lmtp003677	C27H30O17	Quercetin-3-O-sophoroside (Baimaside)	Flavonoids	Flavonols	18609-17-1	B	4618.2	9	9	27636	27135	27068	1.18678	17.6522	4.14177	up
Lmsp003729	C27H30O17	Myricetin-3-O-rutinoside	Flavonoids	Flavonols	-	B	9	9	9	311020	273070	445350	1.44566	38127.4	15.2185	up
Hmlp002975	C28H30O17	Isorhamnetin-3-O-glucuronide-7-O-rhamnoside	Flavonoids	Flavonols	-	B	7448.2	13143	20425	123760	300870	90901	1.36308	12.569	3.65179	up
Lmmp002560	C27H28O18	Quercetin-3-O-(2''-O-glucosyl)glucuronide	Flavonoids	Flavonols	-	B	9	9	9	82692	138410	102650	1.44636	11990.8	13.5496	up
Hmcp001578	C28H32O17	Isorhamnetin-3,7-O-diglucoside	Flavonoids	Flavonols	6758-51-6	B	9	9	9	9	52571	13502	1.01855	2447.48	11.2571	up
mws1506	C29H36O16	Plantamajoside	Phenolic acids	Phenolic acids	104777-68-6	B	12619	12305	16586	24271	22746	19816	1.32424	1.61005	0.687102	insig
pmb0530	C21H27N7O14P2	Nicotinic acid adenine dinucleotide	Nucleotides and derivatives	Nucleotides and derivatives	53-84-9	A	3537500	3000600	3047000	2879000	3315900	2590600	0.633827	0.916579	-0.125669	insig
Lmhp008744	C33H56O14	1-α-Linolenoyl-glycerol-2,3-di-O-glucoside	Lipids	Glycerol ester	-	A	110460	288130	265270	101920	51284	33764	1.18959	0.281638	-1.82809	down
Lmhp008513	C33H56O14	2-α-Linolenoyl-glycerol-1,3-di-O-glucoside	Lipids	Glycerol ester	-	A	242530	381650	480270	102080	103070	69515	1.36044	0.248689	-2.00758	down
Lmhp009190	C33H58O14	2-Linoleoylglycerol-1,3-di-O-glucoside	Lipids	Glycerol ester	-	A	18459	30982	39617	7093.5	7255.4	2047.1	1.26898	0.184105	-2.4414	down
Lmhp009384	C33H58O14	1-Linoleoylglycerol-2,3-di-O-glucoside	Lipids	Glycerol ester	-	A	10621	17990	13712	6151.5	2865.7	3212	1.32824	0.288949	-1.79111	down
Lmmn004145	C38H60O10	3-O-(2-O-Acetyl-glucosyl)oleanolic acid	Terpenoids	Triterpene	-	A	8279200	14132000	13660000	4118700	3912000	1448400	1.26588	0.262789	-1.92803	down
Lmsn006130	C36H56O12	2α,3β,19α-Trihydroxyurs-12-en-23,28-dioic acid-28-O-glucoside	Terpenoids	Triterpene	-	A	10315	9366.7	10224	22125	18484	19592	1.42683	2.01303	1.00937	up
Lmmp003266	C29H30O19	Quercetin-3-O-(2''-malonyl)glucoside-7-O-arabinoside	Flavonoids	Flavonols	-	A	9	9	9	17730	228090	46025	1.42811	10809.1	13.4	up
pmn001370	C32H42O16	Pinoresinol-4,4'-O-di-O-glucoside	Lignans and Coumarins	Lignans	63902-38-5	B	152670	193850	282140	124610	133250	170220	0.956936	0.68094	-0.5544	insig
pmn001368	C32H44O17	Olivil-4,4'-Di-O-glucoside	Lignans and Coumarins	Lignans	-	B	126340	184070	181520	56744	45499	57967	1.40303	0.325676	-1.61849	down
Xmyp004678	C32H38O19	Kaempferol-3-O-(2-O-Xylosyl-6-O-Rhamnosyl)Glucoside	Flavonoids	Flavonoid	-	A	9	9	9	90046	134400	72358	1.44641	10992.7	13.4243	up
Zmlp003063	C33H40O19	Luteolin-7-O-(2''-O-rhamnosyl)rutinoside	Flavonoids	Flavonoid	-	B	1478400	1940800	1648200	54617	83577	35151	1.42833	0.0342079	-4.86953	down
Lmsp003881	C33H40O19	Kaempferol-3-O-rutinoside-7-O-rhamnoside	Flavonoids	Flavonols	-	A	34079000	44712000	36298000	1986500	3557000	1648700	1.42387	0.0624925	-4.00017	down
mws1035	C33H40O19	Kaempferol-3-O-robinoside-7-O-rhamnoside (Robinin)	Flavonoids	Flavonols	301-19-9	B	20867	14279	27684	22900	37074	32843	0.956206	1.47727	0.562935	insig
HJAP061	C32H38O20	Quercetin-3-O-(2''-O-arabinosyl)rutinoside	Flavonoids	Flavonols	-	A	87635	110380	108220	1745600	2663100	2473100	1.43994	22.4723	4.49007	up
Hmcp001618	C32H38O20	Quercetin-3-O-(2''-O-Xylosyl)rutinoside	Flavonoids	Flavonols	129235-39-8	B	9	9	9	47131	60249	48097	1.44681	5758.41	12.4915	up
Hmqp002870	C32H38O20	Luteolin-7-O-Sophoroside-5-O-arabinoside	Flavonoids	Flavonoid	-	B	1916500	2723300	1748500	81406	161400	54767	1.41255	0.0465809	-4.42412	down
pme2651	C21H28N7O17P3	NADP (Nicotinamide adenine dinucleotide phosphate)	Nucleotides and derivatives	Nucleotides and derivatives	53-59-8	B	287250	435530	553500	488350	401650	605420	0.533674	1.1717	0.228606	insig
Lmyp003857	C35H28O19	Kaempferol-3-O-(2'',6''-digalloyl)glucoside	Flavonoids	Flavonoid	-	B	918740	775950	832610	254090	377010	286800	1.40017	0.363194	-1.46119	down
Lnrp102163	C33H40O20	Quercetin-3-O-rutinoside-7-O-rhamnoside	Flavonoids	Flavonols	-	A	9	4601.2	2548.8	42399	41044	28042	1.06327	15.5727	3.96095	up
pmp001105	C33H40O20	Kaempferol-3-O-neohesperidoside-7-O-glucoside	Flavonoids	Flavonols	-	A	63572	140880	128080	23542	13789	51384	1.22527	0.266786	-1.90624	down
Hmcp001559	C33H40O20	Isorhamnetin-3-O-rutinoside-7-O-arabinoside	Flavonoids	Flavonols	-	B	9	9	9	1235.5	6478.6	2916.3	1.42855	393.719	8.62102	up
HJAP127	C33H40O20	Quercetin-3-O-(2''-O-Rhamnosyl)rutinoside	Flavonoids	Flavonols	55696-57-6	A	183240	127050	213780	14230000	13578000	18546000	1.44354	88.45	6.46679	up
Hmcp001329	C32H38O21	Quercetin-3-O-xylosyl(1→2)glucosyl(1→2)glucoside	Flavonoids	Flavonols	-	A	9	9	9	47457	72213	51247	1.44656	6330.26	12.628	up
pmn001505	C41H64O13	Oleanolic acid-3-O-xylosyl(1→3)glucuronide	Terpenoids	Triterpene	-	A	56503	149810	121710	35077	24608	8953.1	1.2265	0.209248	-2.25672	down
Lmyp003588	C35H28O20	Quercetin-3-O-(2'',6''-digalloyl)-glucoside	Flavonoids	Flavonols	-	B	21734	10690	14611	580320	589070	518250	1.43964	35.8805	5.16513	up
HJAP128	C34H42O20	Isorhamnetin-3-O-rutinoside-7-O-rhamnoside	Flavonoids	Flavonoid	-	A	154860	199240	283860	925880	2773000	528480	1.24447	6.62637	2.72822	up
HJAP023	C33H40O21	Kaempferol-6,8-di-C-glucoside-7-O-glucoside	Flavonoids	Flavonoid	-	B	9	9	9	18857	3558.6	50136	1.41241	2687.1	11.3918	up
pme2746	C27H33N9O15P2	Riboflavin 5'-Adenosine Diphosphate	Nucleotides and derivatives	Nucleotides and derivatives	146-14-5	A	1775600	1551700	1808600	2158800	1773900	2497500	1.01313	1.25201	0.324246	insig
Hmcp001589	C34H42O21	Isorhamnetin-3-O-rutinoside-4'-O-glucoside	Flavonoids	Flavonols	111393-97-6	B	9	9	9	3942.4	63337	18936	1.41639	3193.16	11.6408	up
Lmhp003162	C34H42O21	Chrysoeriol-6,8-di-C-glucoside-4'-O-glucoside	Flavonoids	Flavonoid	-	B	9	9	9	6678.5	9	9	0.64831	248.019	7.9543	insig
pmb0676	C38H40O19	Chrysoeriol-8-C-glucoside-7-O-(6''-feruloyl)glucoside	Flavonoids	Flavonoid carbonoside	-	B	363060	271740	246270	45635	37014	45818	1.4342	0.145808	-2.77786	down
Lmhp002374	C39H50O25	Quercetin-3-O-glucosyl(1→4)rhamnoside-7-O-rutinoside	Flavonoids	Flavonols	-	B	9	9	9	101190	61971	119250	1.44465	10459.7	13.3525	up
HJAP123	C40H52O25	Isorhamnetin-3-O-rutinoside-7-O-rutinoside	Flavonoids	Flavonoid	-	A	2820.7	261.7	4422.7	35345	83954	38020	1.2962	20.9616	4.38968	up
