# Supplementary material for: Elucidating the Differentiation Synthesis Mechanisms of Differently Colored Resistance Quinoa Seedings Using Metabolite Profiling and Transcriptome Analysis
Source: Metabolites. 2023 Oct 10;13(10):1065. doi: 10.3390/metabo13101065 (PMC10609267; doi:10.3390/metabo13101065)
Supplement: Supplementary file 1 [file metabolites-13-01065-s001.zip › Table S7.xlsx]

## Sheet: Sheet1
Table S6 All metabolites in R-YvsR-B
Index	Formula	Compounds	Class I	Class II	CAS	Level	R-Y1	R-Y2	R-Y3	R-B1	R-B2	R-B3	VIP	Fold_Change	Log2FC	Type
pme1987	C3H7NO2	L-Alanine	Amino acids and derivatives	Amino acids and derivatives	56-41-7	B	7282.6	3732.9	565.28	4567.6	6709.8	5798.1	0.931198	1.47447	0.560195	insig
ML10198895	C3H7NO2	N-Methylglycine	Amino acids and derivatives	Amino acids and derivatives	107-97-1	B	20166	22550	14793	19070	18423	19727	0.138769	0.994975	-0.00726825	insig
pme3017	C4H9NO2	2-Aminoisobutyric acid	Amino acids and derivatives	Amino acids and derivatives	62-57-7	B	1578800	1496600	1423000	1720400	690670	570290	1.1832	0.66276	-0.593441	insig
pme3033	C4H9NO2	N,N-Dimethylglycine	Amino acids and derivatives	Amino acids and derivatives	1118-68-9	B	328870	309860	265960	484060	201680	309490	0.0953445	1.10008	0.137606	insig
pme0006	C5H9NO2	L-Proline	Amino acids and derivatives	Amino acids and derivatives	147-85-3	B	43104000	35612000	28489000	35151000	37279000	24885000	0.474074	0.907747	-0.139638	insig
pme3193	C4H7NO3	N-Acetyl-L-glycine	Amino acids and derivatives	Amino acids and derivatives	543-24-8	B	14347	4421.6	6333.1	10666	11882	13389	1.04152	1.43166	0.517685	insig
pme0120	C5H11NO2	5-Aminovaleric acid	Amino acids and derivatives	Amino acids and derivatives	660-88-8	B	12902	11966	19097	15169	12651	15346	0.0834868	0.981826	-0.0264601	insig
mws0256	C5H11NO2	L-Valine	Amino acids and derivatives	Amino acids and derivatives	72-18-4	B	10259000	8655800	7063900	9058400	8674700	6176100	0.452788	0.920339	-0.119763	insig
mws0230	C4H9NO3	L-Threonine	Amino acids and derivatives	Amino acids and derivatives	72-19-5	B	1415400	1330900	1156100	1417100	1574500	1511300	1.42946	1.15388	0.206493	insig
pme0195	C3H7NO2S	L-Cysteine	Amino acids and derivatives	Amino acids and derivatives	52-90-4	B	2824.5	6901.9	12853	7461.2	5257.5	18125	0.511437	1.36601	0.449969	insig
mws0263	C5H7NO3	5-Oxo-L-Proline	Amino acids and derivatives	Amino acids and derivatives	98-79-3	A	5815	15876	4066.1	8057.4	13998	3049.6	0.0209681	0.974683	-0.0369954	insig
ML10181668	C6H11NO2	Cycloleucine*	Amino acids and derivatives	Amino acids and derivatives	52-52-8	B	13805000	18163000	9548700	19119000	23398000	8888700	0.496397	1.23819	0.308237	insig
Rfmb319	C6H11NO2	Pipecolic acid*	Amino acids and derivatives	Amino acids and derivatives	4043-87-2	B	3926000	5431000	2405200	5489900	7634500	2130200	0.433339	1.29692	0.375086	insig
mws0227	C6H13NO2	L-Leucine*	Amino acids and derivatives	Amino acids and derivatives	61-90-5	A	1817100	1457300	1165600	1623500	1569500	1067900	0.183401	0.959662	-0.0594015	insig
mws0258	C6H13NO2	L-Isoleucine*	Amino acids and derivatives	Amino acids and derivatives	73-32-5	A	1744400	1487500	1131600	1584500	1480800	1023700	0.303432	0.937092	-0.0937377	insig
pme2527	C5H12N2O2	L-Ornithine	Amino acids and derivatives	Amino acids and derivatives	70-26-8	B	35326	52627	31678	32831	31772	19661	1.11505	0.704366	-0.505603	insig
mws0219	C4H7NO4	L-Aspartic Acid	Amino acids and derivatives	Amino acids and derivatives	56-84-8	A	14055000	15513000	11025000	15094000	17133000	13398000	0.901048	1.12396	0.168594	insig
pme1002	C8H11NO	L-Tyramine	Amino acids and derivatives	Amino acids and derivatives	51-67-2	A	2349500	2465900	1311600	4767400	5616600	4479800	1.74046	2.42595	1.27855	up
Rfmb320	C7H13NO2	1-Methylpiperidine-2-carboxylic acid	Amino acids and derivatives	Amino acids and derivatives	7730-87-2	B	301710	300990	304570	288710	307210	334340	0.502326	1.02534	0.036102	insig
pme0193	C5H10N2O3	L-Glutamine	Amino acids and derivatives	Amino acids and derivatives	56-85-9	A	2365900	2442200	1834700	2056200	2079700	1605400	0.90319	0.864289	-0.210414	insig
pme0026	C6H14N2O2	L-Lysine	Amino acids and derivatives	Amino acids and derivatives	56-87-1	B	2346600	2621900	1962400	2147900	2023400	1642600	1.0874	0.838838	-0.253536	insig
mws1050	C5H9NO4	O-Acetylserine	Amino acids and derivatives	Amino acids and derivatives	5147-00-2	B	574350	990890	667910	808600	1328500	688330	0.808005	1.26522	0.33939	insig
pme0014	C5H9NO4	L-Glutamic acid	Amino acids and derivatives	Amino acids and derivatives	56-86-0	A	69942000	70100000	66646000	67966000	64620000	71559000	0.351155	0.987696	-0.0178604	insig
pme1210	C5H11NO2S	L-Methionine	Amino acids and derivatives	Amino acids and derivatives	63-68-3	A	6352200	7497000	5487600	6731700	5582400	5604500	0.552556	0.926658	-0.109891	insig
mws0254	C6H9N3O2	L-Histidine	Amino acids and derivatives	Amino acids and derivatives	71-00-1	B	635600	767960	423330	875840	1085400	439490	0.692435	1.31411	0.394083	insig
pme0128	C6H12N2O3	L-Alanyl-L-Alanine	Amino acids and derivatives	Amino acids and derivatives	1948-31-8	B	19296	11590	7613.2	27882	25953	30985	1.60387	2.20316	1.13958	up
pme3382	C6H11NO4	N-Acetyl-L-threonine	Amino acids and derivatives	Amino acids and derivatives	17093-74-2	A	118320	87735	72833	99672	88415	82584	0.0618982	0.970537	-0.0431455	insig
pme2914	C6H10O5	3-Hydroxy-3-methylpentane-1,5-dioic acid	Amino acids and derivatives	Amino acids and derivatives	503-49-1	A	116910	182480	92052	345320	137300	252910	1.25864	1.87903	0.909986	insig
pme2758	C5H9NO5	4-Hydroxy-L-glutamic acid	Amino acids and derivatives	Amino acids and derivatives	3913-68-6	A	27379	24163	11600	22223	47700	21110	0.874396	1.44172	0.52779	insig
Lmbp000123	C6H13NO2S	L-Homomethionine	Amino acids and derivatives	Amino acids and derivatives	25148-30-5	B	39607	29813	18575	20514	77809	78354	0.997137	2.00781	1.00562	insig
pme1419	C6H13NO2S	L-Methionine methyl ester	Amino acids and derivatives	Amino acids and derivatives	10332-17-9	A	127300	119150	95134	125260	118730	86096	0.22046	0.966339	-0.0493984	insig
pme0021	C9H11NO2	L-Phenylalanine	Amino acids and derivatives	Amino acids and derivatives	63-91-2	A	31614000	22309000	12686000	31011000	19097000	13084000	0.105214	0.948701	-0.0759752	insig
pme0181	C7H11N3O2	3-Methyl-L-Histidine	Amino acids and derivatives	Amino acids and derivatives	368-16-1	B	29680	36151	29494	27129	25181	31087	1.08686	0.87487	-0.192859	insig
pme0253	C8H15NO3	N-Acetyl-L-leucine	Amino acids and derivatives	Amino acids and derivatives	1188-21-2	A	93947	88006	68544	70188	51207	54120	1.49038	0.700667	-0.513199	insig
Zmyn000155	C7H14N2O3	N-α-Acetyl-L-ornithine	Amino acids and derivatives	Amino acids and derivatives	6205-08-9	B	48610	48989	29048	60245	54566	23535	0.136604	1.09237	0.127468	insig
mws0260	C6H14N4O2	L-Arginine	Amino acids and derivatives	Amino acids and derivatives	74-79-3	A	86288	202630	101990	221870	157380	52672	0.0447775	1.10492	0.143942	insig
pme2559	C6H9NO5	N-Acetyl-L-Aspartic Acid	Amino acids and derivatives	Amino acids and derivatives	997-55-7	A	29785	18140	11627	27093	30974	12659	0.447438	1.18763	0.248091	insig
pmb0468	C6H11NO3S	N-Formyl-L-Methionine	Amino acids and derivatives	Amino acids and derivatives	4289-98-9	B	24420	22186	59326	11979	17875	15185	1.4485	0.425169	-1.23389	down
mws0250	C9H11NO3	L-Tyrosine	Amino acids and derivatives	Amino acids and derivatives	60-18-4	A	1858400	1337300	924160	1646300	1434100	976920	0.0328735	0.98482	-0.0220682	insig
pme2602	C3H8NO6P	O-Phospho-L-serine	Amino acids and derivatives	Amino acids and derivatives	407-41-0	B	20568	20183	17631	21784	7290.8	21197	0.668313	0.861084	-0.215774	insig
pme0122	C8H16N2O3	N6-Acetyl-L-lysine	Amino acids and derivatives	Amino acids and derivatives	692-04-6	A	57747	80883	43617	66313	61226	49215	0.033083	0.96986	-0.0441522	insig
mws0736	C8H16N2O3	N-Glycyl-L-leucine*	Amino acids and derivatives	Amino acids and derivatives	869-19-2	B	363910	303910	332100	351650	386700	334710	0.882272	1.07315	0.101846	insig
mws5041	C8H16N2O3	L-Glycyl-L-isoleucine*	Amino acids and derivatives	Amino acids and derivatives	19461-38-2	B	294090	251840	267650	288210	329610	231110	0.292785	1.04345	0.0613614	insig
Zmjp000182	C7H16N4O2	N-Monomethyl-L-arginine	Amino acids and derivatives	Amino acids and derivatives	17035-90-4	B	53128	50765	29681	63517	56572	40242	0.780238	1.20032	0.263414	insig
pme3388	C7H16N4O2	Homoarginine	Amino acids and derivatives	Amino acids and derivatives	156-86-5	B	9005.2	77169	73484	7856.4	13251	8901.1	1.2676	0.187955	-2.41154	down
pme0075	C7H11NO5	N-Acetyl-L-glutamic acid	Amino acids and derivatives	Amino acids and derivatives	1188-37-0	A	1430100	1081200	1265600	1678500	1873900	978610	0.619371	1.19966	0.26263	insig
pme0278	C7H14N2O4	2,6-Diaminooimelic acid	Amino acids and derivatives	Amino acids and derivatives	583-93-7	B	5503.8	7228.4	3073.9	13220	24878	4945.4	1.22927	2.72321	1.44531	up
pmb2561	C7H13NO3S	N-Acetyl-L-methionine	Amino acids and derivatives	Amino acids and derivatives	65-82-7	B	19697	9750.5	10391	11923	21907	11646	0.448668	1.14151	0.190942	insig
pme3827	C9H11NO4	3,4-Dihydroxy-L-phenylalanine (L-Dopa)	Amino acids and derivatives	Amino acids and derivatives	59-92-7	B	29232	17914	19827	97550	259430	121290	1.79082	7.14124	2.83617	up
mws5037	C9H18N2O3	L-Alanyl-L-leucine	Amino acids and derivatives	Amino acids and derivatives	3303-34-2	B	55909	83526	64342	68460	63231	54420	0.505498	0.913307	-0.130828	insig
NK10251888	C8H18N4O2	NG,NG-Dimethyl-L-arginine	Amino acids and derivatives	Amino acids and derivatives	30315-93-6	A	110120	80961	89375	80538	54797	141830	0.290859	0.988266	-0.0170294	insig
mws0282	C11H12N2O2	L-Tryptophan	Amino acids and derivatives	Amino acids and derivatives	73-22-3	A	5387800	5575500	2814000	5570300	5506900	4437500	0.665018	1.12611	0.171343	insig
Zmgn002106	C11H13NO3	N-Acetyl-L-phenylalanine	Amino acids and derivatives	Amino acids and derivatives	2018-61-3	A	381660	169680	56708	123870	301110	75563	0.0651057	0.823197	-0.280691	insig
pmb2873	C13H13NO2	3-(2-Naphthyl)-L-alanine	Amino acids and derivatives	Amino acids and derivatives	58438-03-2	B	10351	10313	19910	7143.5	9	9606.7	1.00628	0.413053	-1.2756	down
pme0170	C8H16N4O3	N-Acetyl-L-Arginine	Amino acids and derivatives	Amino acids and derivatives	155-84-0	A	41366	35259	31782	30425	33375	39037	0.423813	0.94862	-0.0760985	insig
Lmrj001698	C9H18N2O4	L-Seryl-L-Isoleucine	Amino acids and derivatives	Amino acids and derivatives	91086-51-0	A	285910	90017	140370	111770	79194	52642	1.24621	0.471833	-1.08365	down
pme1228	C11H12N2O3	5-Hydroxy-L-tryptophan	Amino acids and derivatives	Amino acids and derivatives	56-69-9	A	20680	10555	12420	9	9	9	1.88226	0.000618486	-10.659	down
mws5042	C11H14N2O3	L-Glycyl-L-phenylalanine	Amino acids and derivatives	Amino acids and derivatives	721-66-4	B	172750	120960	124280	159850	132130	125750	0.0303712	0.999378	-0.000897671	insig
mws0520	C11H13NO4	N-Acetyl-L-tyrosine	Amino acids and derivatives	Amino acids and derivatives	537-55-3	A	68888	56948	65751	63757	50595	58215	1.03048	0.900724	-0.150843	insig
Lmhp001461	C11H20N2O3	L-Prolyl-L-Leucine	Amino acids and derivatives	Amino acids and derivatives	52899-07-7	B	35112	53546	51039	54746	57376	36919	0.317848	1.06689	0.0934082	insig
Lmhp001670	C11H22N2O3	L-Valyl-L-Leucine	Amino acids and derivatives	Amino acids and derivatives	3989-97-7	B	382350	150760	215680	184510	135920	138000	1.15157	0.612228	-0.70786	insig
pmb0962	C10H22N2O4	L-Lysine-Butanoic Acid	Amino acids and derivatives	Amino acids and derivatives	80407-71-2	B	17454000	12289000	9863300	9986400	15105000	11312000	0.270536	0.919132	-0.121657	insig
mws4176	C12H16N2O3	L-Alanyl-L-Phenylalanine	Amino acids and derivatives	Amino acids and derivatives	3061-90-3	B	28055	15813	23433	18609	14108	8707	1.29244	0.615503	-0.700161	insig
Lmhp002031	C12H24N2O3	L-Leucyl-L-Leucine	Amino acids and derivatives	Amino acids and derivatives	3303-31-9	B	199770	115690	143300	105570	117500	97374	1.34417	0.6985	-0.517667	insig
pmb2591	C13H14N2O3	N-Acetyl-L-Tryptophan	Amino acids and derivatives	Amino acids and derivatives	1218-34-4	A	28279000	23754000	7841600	12742000	31137000	9759100	0.109094	0.895841	-0.158686	insig
mws0124	C13H14N2O3	N-(3-Indolylacetyl)-L-alanine	Amino acids and derivatives	Amino acids and derivatives	57105-39-2	B	9120	14194	13770	14341	13048	17080	0.959086	1.19914	0.262003	insig
pme2563	C8H14N2O5S	γ-Glu-Cys	Amino acids and derivatives	Amino acids and derivatives	636-58-8	B	20794	11853	4250.1	17051	19461	12515	0.855214	1.32875	0.410069	insig
Lmhp001732	C14H18N2O3	L-Prolyl-L-Phenylalanine	Amino acids and derivatives	Amino acids and derivatives	13589-02-1	B	40242	45522	29164	37362	40624	37165	0.204741	1.00194	0.00279661	insig
mws0715	C13H16N2O4	Phenylacetyl-L-glutamine	Amino acids and derivatives	Amino acids and derivatives	28047-15-6	B	35588	15404	12171	24391	20552	26204	0.610408	1.1264	0.171723	insig
Lmhp002001	C14H20N2O3	L-Valyl-L-Phenylalanine	Amino acids and derivatives	Amino acids and derivatives	3918-92-1	B	81431	55016	62377	52632	60922	45324	1.13848	0.799089	-0.323573	insig
pme2890	C8H16N2O4S2	L-Homocystine	Amino acids and derivatives	Amino acids and derivatives	626-72-2	B	11725	4306	5131.1	3472.7	3313.7	4596.6	1.20177	0.537896	-0.894602	insig
mws5035	C15H22N2O3	L-Leucyl-L-phenylalanine	Amino acids and derivatives	Amino acids and derivatives	56217-82-4	B	31146	33892	40563	59438	39152	47683	1.35174	1.38515	0.47004	insig
mws0629	C13H16N2O5	L-Aspartyl-L-Phenylalanine	Amino acids and derivatives	Amino acids and derivatives	13433-09-5	A	25368	31125	25524	19579	15920	33696	0.796308	0.843667	-0.245255	insig
mws1375	C12H21N3O6	Nicotianamine	Amino acids and derivatives	Amino acids and derivatives	34441-14-0	B	229230	108150	55915	175830	113990	127580	0.45573	1.06129	0.0858188	insig
pme1086	C10H17N3O6S	Glutathione reduced form	Amino acids and derivatives	Amino acids and derivatives	70-18-8	A	182000	94531	114640	498440	612480	382750	1.77877	3.81846	1.93299	up
mws0636	C18H20N2O3	L-Phenylalanyl-L-phenylalanine	Amino acids and derivatives	Amino acids and derivatives	2577-40-4	A	9233	9448	8990	12060	8418	6322.5	0.345687	0.968541	-0.0461149	insig
mws0582	C11H19N3O6S	S-(Methyl)glutathione	Amino acids and derivatives	Amino acids and derivatives	2922-56-7	A	59198	72770	48552	70147	75305	89768	1.37193	1.30301	0.381852	insig
pme1286	C14H20N6O5S	S-(5'-Adenosy)-L-homocysteine	Amino acids and derivatives	Amino acids and derivatives	979-92-0	A	524890	388990	334890	628140	505620	434060	1.07042	1.25549	0.328252	insig
pme2735	C15H22N6O5S	S-Adenosyl-L-methionine	Amino acids and derivatives	Amino acids and derivatives	29908-03-0	B	1297400	1503900	1229700	1192600	1107100	1050200	1.46121	0.831034	-0.26702	insig
mws4134	C20H32N6O12S2	Oxiglutatione	Amino acids and derivatives	Amino acids and derivatives	27025-41-8	A	1350200	1693400	1215000	1917400	1664000	1613900	1.31319	1.21995	0.286828	insig
pmb0069	C7H7NO	Benzamide	Phenolic acids	Phenolic acids	55-21-0	B	47135000	24667000	11821000	40880000	91435000	31708000	1.1289	1.96146	0.971926	insig
pme0241	C7H6O2	Benzoic acid	Phenolic acids	Phenolic acids	65-85-0	B	14025	21788	12472	16645	19150	24010	1.00122	1.23858	0.308691	insig
Lmbn001930	C7H6O2	2-Hydroxybenzaldehyde (Salicylaldehyde)	Phenolic acids	Phenolic acids	90-02-8	B	29814	38405	21311	24293	32505	12698	0.727541	0.776231	-0.365441	insig
mws0628	C7H6O2	4-Hydroxybenzaldehyde	Phenolic acids	Phenolic acids	123-08-0	B	111880	213260	267020	222470	182850	305230	0.627117	1.19993	0.262949	insig
ML10179289	C8H10O	2-Phenylethanol	Phenolic acids	Phenolic acids	60-12-8	B	31096000	15435000	6766400	25377000	68203000	19300000	1.0913	2.11793	1.08265	up
mws0566	C7H8O2	4-Methylcatechol	Phenolic acids	Phenolic acids	452-86-8	B	720.93	712.53	353.46	2070.2	359.07	720.93	0.56032	1.76292	0.817968	insig
pmp001086	C6H6O3	5-Hydroxymethylfurfural	Phenolic acids	Phenolic acids	67-47-0	B	76239	53492	56808	41457	51088	92852	0.193328	0.993878	-0.00885939	insig
NK10264324	C6H6O3	1,3,5-Benzenetriol	Phenolic acids	Phenolic acids	108-73-6	B	65521	21061	9	27934	18439	9	0.0339762	0.535645	-0.900652	insig
Zmyn002919	C8H8O2	2-Methylbenzoic acid	Phenolic acids	Phenolic acids	118-90-1	B	3087.9	422.1	1737	1425.7	2914.9	2585.5	0.686402	1.32001	0.40055	insig
mws1336	C7H7NO2	4-Aminobenzoic acid	Phenolic acids	Phenolic acids	150-13-0	B	1276700	1425500	1351600	1112500	1213600	1130000	1.64273	0.852558	-0.23013	insig
mws1078	C7H7NO2	Anthranilic Acid	Phenolic acids	Phenolic acids	118-92-3	B	290120	281880	217480	299230	438300	525690	1.47686	1.60007	0.678131	insig
Hmgn001653	C7H6O3	Protocatechualdehyde*	Phenolic acids	Phenolic acids	139-85-5	B	1557100	771500	568100	220500	340290	184220	1.64067	0.257193	-1.95908	down
Lmgn001670	C7H6O3	Salicylic acid	Phenolic acids	Phenolic acids	69-72-7	A	39741	34283	61625	61819	44732	69643	0.933777	1.2989	0.377286	insig
mws0749	C7H6O3	4-Hydroxybenzoic acid	Phenolic acids	Phenolic acids	99-96-7	B	1577700	872090	530140	188580	369970	234240	1.59587	0.266043	-1.91027	down
Lmbn001981	C7H6O3	2,5-Dihydroxybenzaldehyde*	Phenolic acids	Phenolic acids	1194-98-5	B	1387400	779320	598110	132760	313460	210040	1.66995	0.23736	-2.07485	down
pme2828	C6H5NO3	4-Nitrophenol	Phenolic acids	Phenolic acids	100-02-7	B	17396000	15334000	17688000	17678000	18111000	17510000	0.946677	1.05714	0.0801696	insig
pmp001285	C8H4O3	Phthalic anhydride	Phenolic acids	Phenolic acids	85-44-9	A	739960	884270	654570	624920	837860	1818900	0.727507	1.44009	0.52616	insig
mws2213	C9H8O2	Cinnamic acid	Phenolic acids	Phenolic acids	140-10-3	A	15771	34584	32192	61754	50312	53884	1.55092	2.01037	1.00746	up
Lmxp001668	C9H10O2	2-Methoxy-4-ethenylphenol	Phenolic acids	Phenolic acids	7786-61-0	A	529010	617560	458980	1559300	1040100	2178400	1.7249	2.9758	1.57328	up
mws0182	C8H8O3	p-Hydroxyphenyl acetic acid	Phenolic acids	Phenolic acids	156-38-7	B	9	4757.6	3568.3	7325.5	9	4815.5	0.0444893	1.45773	0.54372	insig
pme2362	C8H8O3	Mandelic acid	Phenolic acids	Phenolic acids	90-64-2	B	100870	100070	108520	48027	29240	57140	1.72939	0.434328	-1.20314	down
mws0458	C8H8O3	Vanillin	Phenolic acids	Phenolic acids	121-33-5	B	139460	190800	273390	233680	178480	333470	0.665102	1.2352	0.304748	insig
mws0444	C7H7NO3	3-Aminosalicylic acid	Phenolic acids	Phenolic acids	570-23-0	B	9529.9	8634.2	10639	8740.6	9183.8	2859	0.945256	0.721568	-0.470792	insig
mws0183	C7H6O4	3,4-Dihydroxybenzoic acid (Protocatechuic acid)*	Phenolic acids	Phenolic acids	99-50-3	A	41818	61613	65303	51528	45674	206390	0.611202	1.79923	0.847383	insig
mws0885	C7H6O4	2,4-Dihydroxybenzoic acid	Phenolic acids	Phenolic acids	89-86-1	A	343870	191620	176130	344680	322170	236750	0.936427	1.26978	0.344577	insig
mws0180	C7H6O4	2,5-Dihydroxybenzoic acid; Gentisic Acid*	Phenolic acids	Phenolic acids	490-79-9	A	26881	30285	33434	22252	41674	126490	0.814886	2.10172	1.07157	insig
pmf0440	C10H10O2	4-MethoxycinnaMaldehyde	Phenolic acids	Phenolic acids	1963-36-6	B	206210	178040	179420	160300	207180	125640	0.816929	0.874838	-0.192912	insig
pme1439	C9H8O3	p-Coumaric acid	Phenolic acids	Phenolic acids	501-98-4	A	846230	1534100	2173100	1998500	2063900	1948300	0.986172	1.32004	0.400579	insig
pmb0142	C9H8O3	Caffeic aldehyde	Phenolic acids	Phenolic acids	141632-15-7	B	101640	119270	165090	123340	93643	187400	0.0498015	1.04762	0.0671215	insig
pme3083	C8H7NO3	2-(Formylamino)benzoic acid	Phenolic acids	Phenolic acids	3342-77-6	B	116970	100070	108300	121410	86340	96656	0.661348	0.935655	-0.0959514	insig
pme0281	C8H6O4	Terephthalic acid	Phenolic acids	Phenolic acids	100-21-0	A	360420	464450	328600	338810	429710	117260	0.775182	0.767926	-0.38096	insig
pme3381	C9H10O3	3-Hydroxyphenylacetic Acid Methyl Ester	Phenolic acids	Phenolic acids	42058-59-3	B	4658.3	11547	6050	5228.9	4257.1	11126	0.192664	0.926161	-0.110664	insig
mws0467	C9H10O3	3-(4-Hydroxyphenyl)-propionic acid	Phenolic acids	Phenolic acids	501-97-3	B	25552	58560	76191	69317	56267	66080	0.683999	1.19564	0.257778	insig
pmn001681	C10H14O2	1-(4-Methoxyphenyl)-1-propanol	Phenolic acids	Phenolic acids	5349-60-0	B	10447	16134	8923	8672.1	5340.1	7864.5	1.33187	0.616176	-0.698586	insig
NK10253223	C8H9NO3	2-Amino-3-methoxybenzoic acid	Phenolic acids	Phenolic acids	3177-80-8	B	103630	140170	104550	90668	132970	80014	0.658909	0.871687	-0.198119	insig
mws0028	C8H8O4	Vanillic acid	Phenolic acids	Phenolic acids	121-34-6	B	116410	44048	40604	10887	26231	18950	1.52605	0.278859	-1.84239	down
Hmbp001276	C8H8O4	Gallacetophenone	Phenolic acids	Phenolic acids	528-21-2	B	7474.6	22208	17536	12513	27598	11335	0.253032	1.08953	0.123704	insig
pme1292	C8H8O4	Homogentisic acid	Phenolic acids	Phenolic acids	451-13-8	B	39888	45512	40197	53305	49554	62318	1.62994	1.31513	0.395211	insig
pme2598	C8H8O4	3,4-Dihydroxybenzeneacetic acid	Phenolic acids	Phenolic acids	102-32-9	B	55582	12247	11202	44769	19517	22611	0.482346	1.09953	0.136888	insig
mws0009	C10H10O3	Coniferaldehyde	Phenolic acids	Phenolic acids	20649-42-7	B	99813	187610	145930	222170	137620	203960	0.943601	1.3009	0.379513	insig
pmb2795	C10H10O3	4-Methoxycinnamic acid*	Phenolic acids	Phenolic acids	830-09-1	A	240840	138310	99356	162980	180760	96405	0.117252	0.919832	-0.120558	insig
mws1195	C10H10O3	p-Coumaric acid methyl ester*	Phenolic acids	Phenolic acids	3943-97-3	A	320580	176280	117800	197190	214700	112490	0.261419	0.853122	-0.229176	insig
mws2212	C9H8O4	Caffeic acid	Phenolic acids	Phenolic acids	331-39-5	A	1260200	622350	463370	488900	401830	410920	1.1914	0.554857	-0.849812	insig
Lmrn001951	C9H10O4	(S)-2-Hydroxy-3-(4-Hydroxyphenyl)Propanoic Acid	Phenolic acids	Phenolic acids	23508-35-2	B	9	9	9	5442.4	7480.1	6949.1	1.88469	735.985	9.52353	up
mws1350	C9H10O4	Syringaldehyde; 4-Hydroxy-3,5-Dimethoxybenzaldehyde	Phenolic acids	Phenolic acids	134-96-3	B	9	9	5526.1	8105.6	9	4862.4	0.569624	2.34069	1.22693	insig
Xmgn006542	C10H10O4	Dimethyl Phthalate	Phenolic acids	Phenolic acids	131-11-3	B	42189	32226	29805	37917	31310	24238	0.610242	0.896805	-0.157134	insig
mws0014	C10H10O4	Ferulic acid	Phenolic acids	Phenolic acids	537-98-4	A	975870	1723800	1285600	4419000	2350600	2244300	1.54708	2.2618	1.17747	up
Lmdn003756	C10H10O4	Methyl caffeate	Phenolic acids	Phenolic acids	3843-74-1	A	37905	3744.5	2155.8	1831400	1789400	1190500	1.79569	109.834	6.77918	up
pmb2497	C9H10O5	4-Hydroxy-3-methoxymandelate	Phenolic acids	Phenolic acids	55-10-7	B	157450	203770	168390	198380	193810	183930	0.960467	1.08782	0.121439	insig
mws0027	C9H10O5	Syringic acid	Phenolic acids	Phenolic acids	530-57-4	B	5450.4	9	5717.7	9	9	4484.3	0.705013	0.402815	-1.31181	insig
pmb1587	C13H18O2	4-Hydroxy-3,5-diisopropylbenzaldehyde	Phenolic acids	Phenolic acids	10537-86-7	B	4386	3618.5	4101.2	5134.5	5378.9	6106.6	1.68341	1.37291	0.457234	insig
Lmln010063	C14H22O	2,6-Di-tert-butylphenol	Phenolic acids	Phenolic acids	128-39-2	A	296550	366270	347410	323950	425670	348210	0.728802	1.08671	0.119971	insig
mws1212	C11H12O4	Methyl ferulate	Phenolic acids	Phenolic acids	2309-07-1	A	2233800	2744100	1825100	2799000	1183800	1977600	0.591758	0.876143	-0.190762	insig
mws2184	C11H12O4	Ethyl caffeate	Phenolic acids	Phenolic acids	102-37-4	B	6354.3	15539	4077.3	5364.7	5981.1	11774	0.0177414	0.89023	-0.16775	insig
pmb2620	C11H12O4	3,4-Dimethoxycinnamic acid	Phenolic acids	Phenolic acids	14737-89-4	A	860400	1378800	952120	1403900	517820	1098800	0.343091	0.94648	-0.0793563	insig
pme3443	C11H12O4	Sinapinaldehyde	Phenolic acids	Phenolic acids	4206-58-0	B	14842	14220	10249	23200	19886	22774	1.71397	1.67536	0.744469	insig
mws0853	C11H14O4	Sinapyl alcohol	Phenolic acids	Phenolic acids	537-33-7	B	3448	14273	10759	9980.8	9196.4	15260	0.631835	1.20917	0.274019	insig
Lmhn003240	C11H10O6	Benzoylmalic acid	Phenolic acids	Phenolic acids	22138-51-8	A	78649	95234	107410	53632	158990	77186	0.14874	1.03027	0.0430238	insig
pmn001669	C12H14O5	Methyl sinapate	Phenolic acids	Phenolic acids	20733-94-2	A	5929.7	3544.5	1362.9	3299.5	1600.8	2354.5	0.505545	0.669441	-0.578971	insig
Lmhn002629	C11H10O7	Benzoyltartaric acid	Phenolic acids	Phenolic acids	-	B	1162200	921700	765490	403020	740570	695590	1.2982	0.645464	-0.63159	insig
Lmhn003373	C11H10O7	p-Hydroxybenzoylmalic acid	Phenolic acids	Phenolic acids	-	B	12034	10695	14128	12438	56891	18604	1.12461	2.38579	1.25447	up
pmp000087	C13H16O6	2-Feruloyl-sn-glycerol	Phenolic acids	Phenolic acids	-	A	5660300	6286400	5847100	4390200	3697700	5892000	1.29179	0.785661	-0.348021	insig
pmp000086	C13H16O6	1-Feruloyl-sn-glycerol	Phenolic acids	Phenolic acids	-	B	4681300	4831900	5381100	4611500	2227000	5022900	0.950918	0.796372	-0.328486	insig
mws1297	C13H18O6	Benzyl glucoside	Phenolic acids	Phenolic acids	4304-12-5	A	52692	86708	90168	88000	73386	106790	0.71214	1.16818	0.224259	insig
pme3472	C12H16O7	Arbutin	Phenolic acids	Phenolic acids	497-76-7	B	33686	31739	15330	26051	84458	19898	0.639375	1.61485	0.691398	insig
Lmlp012720	C16H22O4	Dibutyl phthalate*	Phenolic acids	Phenolic acids	84-74-2	A	16079000	19604000	14857000	13999000	18741000	35558000	0.725319	1.35137	0.434418	insig
Lmxp011770	C16H22O4	Diisobutyl phthalate*	Phenolic acids	Phenolic acids	84-69-5	A	15649000	19701000	15077000	14265000	18510000	37136000	0.749414	1.38638	0.471323	insig
Lmhn002926	C13H12O7	p-Coumaroylmalic acid	Phenolic acids	Phenolic acids	-	A	3440100	4611300	4820800	5784800	7010200	5787500	1.58039	1.44361	0.529686	insig
mws1521	C13H18O7	Salicin	Phenolic acids	Phenolic acids	138-52-3	A	237030	150450	136810	239590	412830	171720	1.08764	1.57192	0.652524	insig
Lmhn102068	C13H12O8	2-O-Caffeoylmalic acid	Phenolic acids	Phenolic acids	53755-04-7	B	1596.6	4301.7	6593.8	20778	25131	34136	1.71393	6.40765	2.6798	up
Lmhn001386	C12H12O9	Vnilloyltartaric acid	Phenolic acids	Phenolic acids	-	B	22464	8289.7	10485	17402	15324	12343	0.480063	1.09288	0.128137	insig
Zmhn001926	C13H16O8	1-O-Salicyl-D-glucose	Phenolic acids	Phenolic acids	60517-74-0	A	26156000	11241000	7502100	44886000	45779000	30565000	1.55813	2.70005	1.43299	up
pmb3142	C13H16O8	Salicylic acid-2-O-glucoside	Phenolic acids	Phenolic acids	10366-91-3	A	5588300	6820000	3527100	2515800	5386800	2645600	1.01495	0.661935	-0.595238	insig
Zmhn000892	C13H18O8	4-O-Glucosyl-3,4-dihydroxybenzyl alcohol	Phenolic acids	Phenolic acids	-	A	145160	196580	184480	253740	297530	330490	1.72075	1.67565	0.74472	insig
Lmhn003074	C14H14O8	Feruloylmalic acid	Phenolic acids	Phenolic acids	-	A	6500500	5725100	8276000	8080900	9438500	7983800	1.25839	1.24396	0.314942	insig
Lmhn001477	C13H12O9	2-Caffeoyl-L-tartaric acid (Caftaric acid)	Phenolic acids	Phenolic acids	67879-58-7	A	79789	58994	72481	471620	764040	601070	1.86461	8.694	3.12002	up
Lmmn002179	C14H18O8	Methyl salicylate-2-O-glucoside	Phenolic acids	Phenolic acids	10019-60-0	B	88260	94726	99523	80562	47082	109100	0.837366	0.838005	-0.254969	insig
pmb2871	C13H16O9	1-O-Gentisoyl-D-glucoside*	Phenolic acids	Phenolic acids	23445-11-6	A	378620	345240	322000	598490	1270900	476360	1.47462	2.24289	1.16536	up
pmn001367	C13H16O9	Protocatechuic acid-4-O-glucoside*	Phenolic acids	Phenolic acids	-	A	285260	234970	180540	442640	889000	292740	1.41217	2.31799	1.21288	up
Hmtn001120	C14H20O8	5-(2-Hydroxyethyl)-2-O-glucosylphenol	Phenolic acids	Phenolic acids	-	A	41626	175240	172100	799750	559210	895860	1.66862	5.79696	2.5353	up
pmb0751	C16H16O7	Trans-5-O-(p-Coumaroyl)shikimate	Phenolic acids	Phenolic acids	-	B	89675	130920	168290	163540	168280	181380	1.18412	1.31967	0.400178	insig
Lmhn002140	C14H14O9	Feruloyltartaric acid (Fertaric acid)	Phenolic acids	Phenolic acids	-	B	4660700	2764100	2634400	1888300	2544600	1774700	1.36183	0.617107	-0.696408	insig
Zmhn002301	C15H18O8	p-Coumaric acid-4-O-glucoside	Phenolic acids	Phenolic acids	117405-48-8	A	27916000	19159000	21016000	23343000	23240000	29874000	0.733216	1.12286	0.167184	insig
pmn001690	C16H24O7	3-Hydroxy-4-isopropylbenzylalcohol-3-O-glucoside	Phenolic acids	Phenolic acids	-	B	107450	45501	43767	26697	23466	29140	1.52403	0.40313	-1.31068	down
Lmmn003663	C14H18O9	5-Glucosyloxy-2-Hydroxybenzoic acid methyl ester	Phenolic acids	Phenolic acids	-	B	4361.6	5940.2	8119.6	14838	11824	4918.6	0.972561	1.71434	0.777656	insig
Lmtn002565	C14H18O9	1-O-Vanilloyl-D-Glucose	Phenolic acids	Phenolic acids	-	B	1103600	1168300	926630	672210	464670	629990	1.724	0.552401	-0.856213	insig
Zmhn001883	C14H18O9	Vanillic acid-4-O-glucoside	Phenolic acids	Phenolic acids	32142-31-7	B	3232.4	7400.1	3886.2	2519.2	12072	2064.8	0.137326	1.14721	0.19813	insig
pmn001517	C15H22O8	3,4,5-Trimethoxyphenyl-1-O-Glucoside	Phenolic acids	Phenolic acids	-	B	8710700	9064200	6291100	7722900	4369600	7339000	0.896594	0.807425	-0.308599	insig
Zmhn001793	C15H18O9	6-O-Caffeoyl-D-glucose	Phenolic acids	Phenolic acids	-	B	11149000	8577600	8362700	11650000	9293800	12401000	1.03915	1.1871	0.247441	insig
mws0906	C16H22O8	Coniferin	Phenolic acids	Phenolic acids	531-29-3	B	14384000	11871000	11802000	19574000	12867000	18107000	1.26154	1.32822	0.409492	insig
Lmmn000774	C15H20O9	Dihydrocaffeoylglucose	Phenolic acids	Phenolic acids	-	B	140110	37965	32314	69410	31376	75983	0.0388589	0.840201	-0.251194	insig
Lmtn000940	C14H18O10	1-O-(3,4-Dihydroxy-5-methoxy-benzoyl)-glucoside	Phenolic acids	Phenolic acids	-	B	14749	16861	16763	108370	109940	121150	1.88115	7.01755	2.81097	up
mws0178	C16H18O9	Chlorogenic acid (3-O-Caffeoylquinic acid)*	Phenolic acids	Phenolic acids	327-97-9	A	11983	20895	256090	12928	4950.1	63905	0.728388	0.283018	-1.82104	insig
mws2108	C16H18O9	Cryptochlorogenic acid (4-O-Caffeoylquinic acid)	Phenolic acids	Phenolic acids	905-99-7	B	8550.2	7966.1	177760	7166.1	4448	52329	0.533628	0.329135	-1.60325	insig
pme1816	C16H18O9	Neochlorogenic acid (5-O-Caffeoylquinic acid)*	Phenolic acids	Phenolic acids	906-33-2	A	5802.1	18573	272440	12161	7773.5	56752	0.456064	0.258365	-1.95252	insig
Zmhn002422	C16H20O9	1-O-Feruloyl-D-Glucose	Phenolic acids	Phenolic acids	-	A	13710000	9832300	7769900	13345000	6199900	13006000	0.00544731	1.03956	0.0559726	insig
Hmmn002544	C16H20O9	Ferulic acid-4-O-glucoside	Phenolic acids	Phenolic acids	117405-51-3	A	88539	177220	88946	85275	83404	156910	0.184008	0.917915	-0.123568	insig
Zmhn002334	C16H20O9	6-O-Feruloyl-D-glucose	Phenolic acids	Phenolic acids	137887-25-3	B	630400	1021800	606170	1400100	425170	836560	0.182119	1.17865	0.237137	insig
pmb3107	C15H20O10	Glucosyringic Acid	Phenolic acids	Phenolic acids	-	B	44077	96691	137440	48423	43856	90499	0.808479	0.656983	-0.606071	insig
pma3724	C17H20O9	1-O-Feruloylquinic acid	Phenolic acids	Phenolic acids	-	B	196760	197180	95959	137450	136080	72589	0.830866	0.706511	-0.501216	insig
pmb0752	C17H20O9	3-O-Feruloylquinic acid	Phenolic acids	Phenolic acids	1899-29-2	B	316590	280160	113730	190280	143250	146390	0.746624	0.675487	-0.566	insig
Lmbp002309	C17H22O9	Sinapaldehyde-4-O-Glucoside	Phenolic acids	Phenolic acids	154461-65-1	B	73176	536500	385590	160910	88045	149900	0.855548	0.400752	-1.31922	insig
pmn001695	C16H20O10	Trihydroxycinnamoylquinic acid	Phenolic acids	Phenolic acids	-	B	224190	206940	172860	171110	108660	169080	1.2963	0.743141	-0.428291	insig
mws0011	C17H24O9	Syringin	Phenolic acids	Phenolic acids	118-34-3	B	572180	1009800	549230	186660	29046	111180	1.65397	0.15338	-2.70481	down
Zmhn002227	C17H22O10	4-O-Glucosyl-sinapate	Phenolic acids	Phenolic acids	-	B	25065	16832	18826	18931	10522	20092	0.859439	0.815918	-0.293504	insig
pmb2940	C17H22O10	1-O-Glucosyl sinapate	Phenolic acids	Phenolic acids	78185-48-5	B	548790	569730	287440	360380	271890	289390	1.14902	0.655538	-0.609249	insig
HJN003	C17H22O10	1-O-Sinapoyl-D-glucose	Phenolic acids	Phenolic acids	-	B	423090	223530	283620	263690	213610	318250	0.591323	0.855209	-0.22565	insig
Lmmp010562	C24H38O4	Diisooctyl Phthalate	Phenolic acids	Phenolic acids	27554-26-3	B	364660	384350	543580	435710	225160	248800	1.21958	0.703758	-0.50685	insig
Cmjn004337	C18H26O10	Benzyl-(2''-O-xylosyl)glucoside	Phenolic acids	Phenolic acids	-	B	10779	37167	49470	54581	46129	53733	1.04441	1.5854	0.664844	insig
Lmtn002324	C19H28O11	Benzyl-(2''-O-glucosyl)glucoside	Phenolic acids	Phenolic acids	-	B	37096	23464	27686	23131	21940	15929	1.36234	0.691249	-0.532722	insig
pmb2654	C19H27NO12	Anthranilate-1-O-Sophoroside	Phenolic acids	Phenolic acids	-	B	312490	156680	174700	152810	195730	481090	0.387276	1.28851	0.365699	insig
Zmhn002508	C21H28O12	4-p-Cumaroyl-rhamnosyl-(1→6)-D-glucose	Phenolic acids	Phenolic acids	-	B	39750	52453	3731.1	9058.8	26787	16791	0.145742	0.548677	-0.865972	insig
Zmhn004909	C21H18O13	3,4-Digalloylshikimic acid	Phenolic acids	Phenolic acids	-	B	115870	102740	71348	96778	85690	68971	0.624011	0.867157	-0.205636	insig
Lmnn002886	C23H26O11	1'-O-(3,4-Dihydroxyphenethyl)-O-caffeoyl-glucoside	Phenolic acids	Phenolic acids	-	B	30632000	21474000	15856000	20775000	22972000	17247000	0.311046	0.897472	-0.156061	insig
pmb3072	C22H26O12	3-O-p-Coumaroylshikimic acid-O-glucoside	Phenolic acids	Phenolic acids	-	B	11993	6566	16258	16307	18117	18575	1.21111	1.52222	0.606173	insig
pmn001707	C30H46O5	Quillaic acid	Phenolic acids	Phenolic acids	631-01-6	B	1129600	832320	1307800	709650	606650	278150	1.47542	0.487641	-1.03611	down
Zmhn000785	C19H32O16	Di-O-Glucosylquinic acid	Phenolic acids	Phenolic acids	-	A	215290	156950	146840	103250	176140	145900	0.845591	0.819315	-0.28751	insig
Hmbn002692	C22H30O14	6'-O-Feruloyl-D-sucrose	Phenolic acids	Phenolic acids	118230-77-6	B	625970	367580	159060	280350	204800	363650	0.370992	0.736416	-0.441408	insig
pmb0824	C25H28O13	Syringic acid-4-O-(6''-feruloyl)glucoside	Phenolic acids	Phenolic acids	-	B	20130	20155	12522	39160	10231	20347	0.327267	1.32062	0.401216	insig
Hmln002149	C29H36O15	Acteoside	Phenolic acids	Phenolic acids	61276-17-3	B	13275	9541	11665	5794.1	4438.3	9217.5	1.51952	0.564076	-0.826039	insig
mws1506	C29H36O16	Plantamajoside	Phenolic acids	Phenolic acids	104777-68-6	B	15345	15885	26723	24271	22746	19816	0.727344	1.15323	0.205677	insig
pme3200	C2H7N3	1-methylguanidine	Nucleotides and derivatives	Nucleotides and derivatives	471-29-4	B	9	7407.1	1621.1	9	9	9	1.30492	0.00298765	-8.38677	down
mws0255	C4H5N3O	Cytosine	Nucleotides and derivatives	Nucleotides and derivatives	71-30-7	B	1588800	1975900	1433100	645670	2018100	787670	1.00117	0.690592	-0.534095	insig
pme0257	C4H4N2O2	Uracil	Nucleotides and derivatives	Nucleotides and derivatives	66-22-8	A	267270	216050	141420	122910	182520	220150	0.539227	0.841278	-0.249346	insig
mws0251	C5H6N2O2	Thymine	Nucleotides and derivatives	Nucleotides and derivatives	65-71-4	B	14741	25000	18258	14559	21995	13386	0.558512	0.861049	-0.215832	insig
pmb0374	C5H5N5	2-Aminopurine	Nucleotides and derivatives	Nucleotides and derivatives	452-06-2	A	69177	64912	45513	145340	141020	94307	1.69835	2.1195	1.08373	up
pme0040	C5H5N5	Adenine	Nucleotides and derivatives	Nucleotides and derivatives	73-24-5	A	23427000	14521000	12021000	8318200	9646500	5941000	1.53877	0.478411	-1.06368	down
pme0033	C5H4N4O	Hypoxanthine	Nucleotides and derivatives	Nucleotides and derivatives	68-94-0	B	14713	35563	46825	380170	375290	458260	1.81421	12.4996	3.64381	up
mws0847	C6H7N5	1-Methyladenine	Nucleotides and derivatives	Nucleotides and derivatives	5142-22-3	B	95635	119210	95052	116120	70184	104310	0.451172	0.937776	-0.0926846	insig
pme0183	C5H5N5O	Isoguanine	Nucleotides and derivatives	Nucleotides and derivatives	3373-53-3	B	157090	204540	132120	170510	151340	130430	0.421043	0.91601	-0.126565	insig
pme1109	C5H5N5O	Guanine	Nucleotides and derivatives	Nucleotides and derivatives	73-40-5	A	287520	258440	244550	82685	141760	124000	1.72991	0.440785	-1.18185	down
pme0256	C5H4N4O2	Xanthine	Nucleotides and derivatives	Nucleotides and derivatives	69-89-6	A	23747	26438	27674	49268	50691	25160	1.27807	1.60699	0.684365	insig
mws1641	C6H4N4O2	Lumazine	Nucleotides and derivatives	Nucleotides and derivatives	487-21-8	B	8798.3	9083.6	10939	13620	10108	8285.6	0.460074	1.11078	0.15157	insig
pmc0274	C6H6N4S	6-Methylmercaptopurine	Nucleotides and derivatives	Nucleotides and derivatives	50-66-8	B	33343000	24445000	13575000	34059000	20445000	14555000	0.0574971	0.967714	-0.0473468	insig
mws0863	C5H11O7P	2-Deoxyribose-5'-phosphate	Nucleotides and derivatives	Nucleotides and derivatives	102916-66-5	B	14259	21090	9439.9	19409	31748	18461	1.24363	1.55436	0.636319	insig
pmb2507	C5H11O7P	2-Deoxyribose-1-phosphate	Nucleotides and derivatives	Nucleotides and derivatives	17210-42-3	B	89463	125570	78487	188420	181660	149800	1.69131	1.77119	0.82472	insig
pme1194	C9H13N3O4	2'-Deoxycytidine	Nucleotides and derivatives	Nucleotides and derivatives	951-77-9	B	29048	17174	15161	18374	29529	12420	0.0786505	0.982731	-0.025131	insig
pme0264	C10H14N2O5	Thymidine	Nucleotides and derivatives	Nucleotides and derivatives	50-89-5	B	103620	91353	69251	70421	101810	60149	0.573732	0.879481	-0.185276	insig
pme3732	C9H13N3O5	Cytidine	Nucleotides and derivatives	Nucleotides and derivatives	65-46-3	B	311880	269830	196770	300100	358450	277980	1.06123	1.20302	0.266665	insig
ML10180524	C9H13N3O5	Cytarabine	Nucleotides and derivatives	Nucleotides and derivatives	147-94-4	B	291920	206760	140880	151450	247660	144390	0.445383	0.849803	-0.2348	insig
mws0248	C9H12N2O6	Uridine	Nucleotides and derivatives	Nucleotides and derivatives	58-96-8	A	197560	187970	156790	313570	347080	121400	0.720485	1.44205	0.528116	insig
pme3961	C10H13N5O3	2'-Deoxyadenosine	Nucleotides and derivatives	Nucleotides and derivatives	958-09-8	A	157470	113670	82190	182630	205030	113820	1.09277	1.4193	0.505176	insig
pme1187	C10H14N2O6	5-Methyluridine	Nucleotides and derivatives	Nucleotides and derivatives	1463-10-1	B	4887	3574.8	9	1845	3549.1	1895.3	0.690797	0.860533	-0.216698	insig
pme1184	C10H13N5O4	2'-Deoxyguanosine	Nucleotides and derivatives	Nucleotides and derivatives	961-07-9	B	241110	154990	146790	178770	137970	224070	0.0052463	0.996169	-0.00553808	insig
pme0230	C10H13N5O4	Adenosine	Nucleotides and derivatives	Nucleotides and derivatives	58-61-7	A	623680	442250	416480	1381300	1325900	774580	1.66463	2.34873	1.23188	up
mws1060	C10H12N4O5	9-(Arabinosyl)hypoxanthine	Nucleotides and derivatives	Nucleotides and derivatives	7013-16-3	A	96379	80953	94065	270140	282670	103280	1.44197	2.41745	1.27349	up
Hmhp001812	C11H15N5O4	2'-O-Methyladenosine	Nucleotides and derivatives	Nucleotides and derivatives	2140-79-6	A	78967	36116	34768	39254	52603	40637	0.165915	0.884172	-0.177602	insig
pme3350	C10H13N5O5	8-Hydroxy-2-deoxyguanosine	Nucleotides and derivatives	Nucleotides and derivatives	88847-89-6	B	9	9	9	9	9	3890	0.835768	144.741	7.17733	insig
pme1178	C10H13N5O5	Guanosine	Nucleotides and derivatives	Nucleotides and derivatives	118-00-3	A	9281600	4215600	3102800	6989200	7708600	3033000	0.23344	1.06812	0.0950744	insig
mws0668	C10H12N4O6	Xanthosine	Nucleotides and derivatives	Nucleotides and derivatives	146-80-5	A	846390	524330	338150	1172800	1316300	555350	1.1742	1.78156	0.833139	insig
Lmqp000329	C8H14N3O7P	5-Aminoimidazole ribonucleotide	Nucleotides and derivatives	Nucleotides and derivatives	25635-88-5	A	75346	81911	36591	75364	159300	35556	0.448874	1.39398	0.479209	insig
pme1474	C11H15N5O3S	5'-Deoxy-5'-(methylthio)adenosine	Nucleotides and derivatives	Nucleotides and derivatives	2457-80-9	A	4876000	3979300	5855700	3378200	4235400	3802100	1.3255	0.775998	-0.365876	insig
pmb0197	C11H15N5O5	N7-Methylguanosine	Nucleotides and derivatives	Nucleotides and derivatives	20244-86-4	B	43414	39434	31404	63829	54413	54822	1.68458	1.51476	0.599086	insig
pme3967	C12H17N5O5	2-(Dimethylamino)guanosine	Nucleotides and derivatives	Nucleotides and derivatives	2140-67-2	B	120910	100110	71968	150360	114240	111100	1.12399	1.28231	0.35874	insig
pme3174	C9H14N3O8P	Cytidine 5'-monophosphate(Cytidylic acid)	Nucleotides and derivatives	Nucleotides and derivatives	63-37-6	B	41497	44876	26066	52955	23369	47187	0.185463	1.09847	0.135497	insig
pme3188	C9H13N2O9P	Uridine 5'-monophosphate	Nucleotides and derivatives	Nucleotides and derivatives	58-97-9	B	217070	57215	67246	25593	13918	40518	1.50831	0.234324	-2.09342	down
mws0884	C10H12N5O6P	Cyclic 3',5'-Adenylic acid	Nucleotides and derivatives	Nucleotides and derivatives	60-92-4	A	80821	52834	49381	187400	183510	100610	1.65724	2.57611	1.36519	up
pme3184	C10H14N5O6P	2'-Deoxyadenosine-5'-monophosphate	Nucleotides and derivatives	Nucleotides and derivatives	653-63-4	A	289080	231030	290120	216120	273280	291400	0.327511	0.963677	-0.0533785	insig
mws0675	C11H15N2O8P	β-Nicotinamide mononucleotide	Nucleotides and derivatives	Nucleotides and derivatives	1094-61-7	B	82102	122180	83320	214550	124040	74499	0.756085	1.43632	0.522379	insig
mws0609	C10H12N5O7P	Guanosine 3',5'-cyclic monophosphate	Nucleotides and derivatives	Nucleotides and derivatives	7665-99-8	A	82073	56278	109240	67850	60992	83486	0.608759	0.857576	-0.221664	insig
pmb0981	C10H14N5O7P	Adenosine 5'-monophosphate	Nucleotides and derivatives	Nucleotides and derivatives	61-19-8	A	3479700	6607700	6831900	4889200	4131100	8375100	0.0605608	1.02814	0.040036	insig
mws0874	C10H14N5O7P	3'-Adenylic Acid	Nucleotides and derivatives	Nucleotides and derivatives	84-21-9	A	17761	19619	21434	21046	20983	20637	0.948382	1.06549	0.0915233	insig
pmb0998	C10H14N5O8P	Guanosine 5'-monophosphate	Nucleotides and derivatives	Nucleotides and derivatives	85-32-5	A	128080	92439	117610	60168	59868	84534	1.64131	0.605006	-0.724979	insig
pmb0964	C16H23N5O5	Isopentenyladenine-7-N-glucoside	Nucleotides and derivatives	Nucleotides and derivatives	-	B	21299	35908	25597	25616	20844	61579	0.438078	1.30476	0.38378	insig
pme3337	C14H17N5O8	Succinyladenosine	Nucleotides and derivatives	Nucleotides and derivatives	4542-23-8	A	1123400	900830	799690	982260	1606400	641880	0.286202	1.14399	0.194076	insig
pme3007	C9H14N2O12P2	Uridine 5'-diphosphate	Nucleotides and derivatives	Nucleotides and derivatives	27821-45-0	A	39138	52919	50567	60827	47149	33704	0.136398	0.993381	-0.00958065	insig
pme2117	C10H15N5O10P2	Adenosine 5'-diphosphate	Nucleotides and derivatives	Nucleotides and derivatives	58-64-0	A	198450	231740	234290	267860	160540	217850	0.323001	0.972565	-0.0401334	insig
Zmfn000481	C14H22N2O16P2	Uridine-5'-Diphosphate-D-Xylose	Nucleotides and derivatives	Nucleotides and derivatives	3616-06-6	B	223870	245840	139760	246100	290670	153310	0.478322	1.13226	0.179208	insig
pmb2922	C15H24N2O17P2	Uridine 5'-diphospho-D-glucose	Nucleotides and derivatives	Nucleotides and derivatives	133-89-1	A	1237500	1648000	1267400	1903400	1626800	1345100	0.976667	1.17395	0.231372	insig
pmb0530	C21H27N7O14P2	Nicotinic acid adenine dinucleotide	Nucleotides and derivatives	Nucleotides and derivatives	53-84-9	A	3176000	2868400	2530200	2879000	3315900	2590600	0.278485	1.0246	0.035055	insig
pme2651	C21H28N7O17P3	NADP (Nicotinamide adenine dinucleotide phosphate)	Nucleotides and derivatives	Nucleotides and derivatives	53-59-8	B	432200	676420	831910	488350	401650	605420	0.909751	0.770625	-0.3759	insig
pme2746	C27H33N9O15P2	Riboflavin 5'-Adenosine Diphosphate	Nucleotides and derivatives	Nucleotides and derivatives	146-14-5	A	2267200	2140700	2176100	2158800	1773900	2497500	0.342673	0.97664	-0.0341007	insig
mws1175	C16H14O4	Pinostrobin	Flavonoids	Dihydroflavone	480-37-5	B	2647.9	3280.8	3239.8	4333.1	2063.5	2501.8	0.347481	0.97054	-0.0431398	insig
pme0376	C15H12O5	Naringenin (5,7,4'-Trihydroxyflavanone)	Flavonoids	Dihydroflavone	480-41-1	A	49155	26538	26545	18388	20735	13433	1.49185	0.514055	-0.960004	insig
mws0051	C16H12O5	Acacetin	Flavonoids	Flavonoid	480-44-4	B	221940	209890	126490	141540	554040	268080	0.89177	1.726	0.787432	insig
mws0129	C16H12O5	Genkwanin (Apigenin 7-methyl ether)	Flavonoids	Flavonoid	437-64-9	B	216200	201860	120530	145820	545080	260950	0.957157	1.7673	0.821547	insig
mws1068	C15H10O6	Kaempferol (3,5,7,4'-Tetrahydroxyflavone)	Flavonoids	Flavonols	520-18-3	A	73036	39193	31147	53857	117310	39156	0.756594	1.46693	0.552803	insig
mws1094	C15H12O6	Aromadendrin (Dihydrokaempferol)	Flavonoids	Dihydroflavonol	480-20-6	B	7415.9	7019.8	8358.8	1860.7	6093.9	3375.9	1.40739	0.497072	-1.00847	down
pmp000001	C16H12O6	Hispidulin (5,7,4'-Trihydroxy-6-methoxyflavone)	Flavonoids	Flavonoid	1447-88-7	B	9205.5	4856.2	21168	30075	7859.8	7329.4	0.222567	1.28483	0.361578	insig
pme2954	C15H10O7	Quercetin	Flavonoids	Flavonols	117-39-5	A	106670	97215	55952	155420	205590	149960	1.62676	1.9665	0.975632	insig
Cmsp004086	C16H14O6	Dihydrokaempferide	Flavonoids	Flavonols	137225-59-3	B	526750	314980	167910	221780	307640	194990	0.564192	0.717493	-0.478963	insig
mws0044	C15H12O7	Dihydroquercetin(Taxifolin)	Flavonoids	Dihydroflavonol	480-18-2	B	30992	27193	11147	44609	62399	28313	1.30718	1.95178	0.964792	insig
mws1174	C17H14O6	3-O-Acetylpinobanksin	Flavonoids	Dihydroflavonol	52117-69-8	A	9	3302.6	4552.8	27003	9	9	0.411206	3.43586	1.78067	insig
mws0066	C16H12O7	Isorhamnetin	Flavonoids	Flavonols	480-19-3	A	39857	102190	73252	81308	176130	51038	0.63077	1.43278	0.518817	insig
Lmmn004912	C16H12O7	3-O-Methylquercetin	Flavonoids	Flavonols	1486-70-0	B	5594.1	1672	3274.5	9059.6	5923.5	18029	1.42065	3.1319	1.64704	up
Lmbp003668	C20H18O10	Kaempferol-3-O-arabinoside	Flavonoids	Flavonoid	-	B	692780	94605	37916	34838	231450	23901	0.633972	0.351616	-1.50793	insig
mws0919	C21H20O10	Kaempferol-3-O-rhamnoside (Afzelin)	Flavonoids	Flavonols	482-39-3	A	4006.2	9	9	9	14293	2277.1	0.696394	4.11985	2.04259	insig
pme0321	C21H20O10	Kaempferol-7-O-rhamnoside	Flavonoids	Flavonols	20196-89-8	B	8519.7	3028.2	3740.8	2351.2	12535	2499.6	0.100045	1.13717	0.185444	insig
mws2186	C20H18O11	Avicularin(Quercetin-3-O-α-L-arabinofuranoside)	Flavonoids	Flavonols	572-30-5	A	2021500	618300	221300	326780	666670	272340	0.607348	0.442414	-1.17653	insig
Lmdp003509	C20H18O11	Quercetin-3-O-xyloside (Reynoutrin)	Flavonoids	Flavonols	549-32-6	B	2526500	762260	364820	419060	943140	416500	0.63696	0.486838	-1.03849	insig
HJN087	C21H22O10	Naringenin-4'-O-glucoside	Flavonoids	Flavonoid	-	B	49109	76497	54544	26592	38437	22401	1.60554	0.485318	-1.043	down
mws1179	C21H22O10	Naringenin-7-O-glucoside (Prunin)	Flavonoids	Dihydroflavone	529-55-5	B	34387	13549	13157	25834	19291	26624	0.670193	1.17442	0.231952	insig
HJN055	C21H24O10	Dihydrocharcone-4'-O-glucoside	Flavonoids	Chalcones	-	A	835680	752530	726970	326840	359760	394930	1.84967	0.467147	-1.09805	down
mws2118	C21H24O10	Phloretin-2'-O-glucoside (Phlorizin)	Flavonoids	Chalcones	60-81-1	A	446860	392430	387830	189780	181830	176100	1.87019	0.446338	-1.16379	down
Hmcp002316	C21H20O11	Isorhamnetin-3-O-arabinoside	Flavonoids	Flavonols	-	A	853170	1160600	612720	160740	912930	108090	1.20879	0.449939	-1.1522	down
mws2209	C21H20O11	Kaempferol-3-O-glucoside (Astragalin)	Flavonoids	Flavonols	480-10-4	B	3370800	618780	383330	838540	1912000	536930	0.0625597	0.751781	-0.411616	insig
Xmyp005654	C21H20O11	Kaempferol-4'-O-glucoside	Flavonoids	Flavonoid	-	A	5295700	970490	654620	456850	2443100	407300	0.641071	0.47787	-1.06531	insig
mws0045	C21H20O11	Quercetin-3-O-rhamnoside(Quercitrin)	Flavonoids	Flavonols	522-12-3	B	21135	9	9	41896	60604	29571	1.4127	6.24361	2.64238	up
Hmpp003270	C21H20O11	Luteolin-4'-O-glucoside	Flavonoids	Flavonoid	6920-38-3	A	894970	461650	404310	889790	2204300	657530	1.1874	2.13048	1.09118	up
mws0913	C21H20O11	Kaempferol-3-O-galactoside (Trifolin)	Flavonoids	Flavonols	23627-87-4	B	191690	125880	124680	50685	164900	54817	1.11546	0.611423	-0.709756	insig
Lmlp003531	C21H20O11	Luteolin-3'-O-glucoside	Flavonoids	Flavonoid	5154-41-6	A	956150	424090	429110	744970	1873300	613250	1.00681	1.78601	0.836741	insig
pme2459	C21H20O11	Luteolin-7-O-glucoside (Cynaroside)	Flavonoids	Flavonoid	5373-11-5	A	2672200	1186400	374480	1067100	4062800	1148700	0.656032	1.48322	0.568735	insig
HJN086	C21H22O11	Eriodictyol-3'-O-glucoside	Flavonoids	Dihydroflavone	-	B	17200	9350.3	5731.6	30650	6638.7	23886	0.802986	1.89502	0.92221	insig
Lmtn002796	C21H22O11	Aromadendrin-7-O-glucoside	Flavonoids	Flavonoid	28189-90-4	B	137710	101510	136660	80780	94139	86709	1.62203	0.696041	-0.522755	insig
mws0057	C21H22O11	Eriodictyol-7-O-glucoside	Flavonoids	Dihydroflavone	38965-51-4	B	44423	33295	18893	17962	79544	35861	0.440627	1.38045	0.465142	insig
Lmmn004625	C21H22O11	Dihydrokaempferol-7-O-glucoside	Flavonoids	Flavonols	-	B	3574.6	2537	901.55	9	9	9	1.85442	0.00384991	-8.02096	down
HJN041	C21H24O11	Epicatechin glucoside	Flavonoids	Flavanols	-	B	8182.3	8371.9	4076.3	7648.5	11300	9222.1	1.11316	1.36548	0.449412	insig
Lmzn001894	C21H18O12	Kaempferol-3-O-glucuronide	Flavonoids	Flavonols	22688-78-4	A	2012400	914080	803490	387310	606790	416200	1.52286	0.3781	-1.40316	down
mws4167	C21H18O12	Luteolin-7-O-glucuronide	Flavonoids	Flavonoid	29741-10-4	A	5438900	2935200	3433700	1368600	1799200	1457700	1.71916	0.391733	-1.35206	down
Lmmp003767	C21H18O12	Kaempferol-7-O-glucuronide	Flavonoids	Flavonols	-	B	14959000	12948000	10739000	9989500	13857000	10204000	0.718193	0.881087	-0.182643	insig
Hmcp002539	C22H22O11	Isorhamnetin-3-O-rhamnoside	Flavonoids	Flavonols	-	B	20175	42577	12070	43338	157260	17147	0.961394	2.91017	1.54111	insig
pmp000579	C22H22O11	Diosmetin-7-O-galactoside	Flavonoids	Flavonoid	-	A	479000	295530	206870	245190	300170	413350	0.0745218	0.97688	-0.0337468	insig
mws1329	C21H20O12	Quercetin-7-O-glucoside*	Flavonoids	Flavonols	491-50-9	A	1697700	726790	656380	291680	553570	428160	1.40557	0.413328	-1.27464	down
mws0091	C21H20O12	Quercetin-3-O-glucoside (Isoquercitrin)*	Flavonoids	Flavonols	482-35-9	A	3077700	1189600	1273900	623740	1055900	621530	1.40842	0.415284	-1.26783	down
mws0061	C21H20O12	Quercetin-3-O-galactoside (Hyperin)	Flavonoids	Flavonols	482-36-0	A	4843700	1841500	1941000	827570	1998500	1184300	1.23631	0.464906	-1.10499	down
Lmdp003286	C21H20O12	Isohyperoside	Flavonoids	Flavonols	35589-21-0	A	26260000	9475900	6042700	4447700	7794200	5550300	1.08823	0.425869	-1.23152	down
Lmzp002365	C22H24O11	Hesperetin-7-O-glucoside	Flavonoids	Flavonoid	31712-49-9	B	974360	1316300	904850	511460	612580	445710	1.71014	0.491236	-1.02551	down
pme1598	C22H24O11	Hesperetin-5-O-glucoside	Flavonoids	Dihydroflavonol	69651-80-5	B	2741000	1382900	764750	530540	968680	664790	1.19916	0.44266	-1.17573	down
Xmsn002700	C21H22O12	Taxifolin-3'-O-glucoside	Flavonoids	Flavonoid	31106-05-5	B	67881	24052	22782	15412	21215	14548	1.2605	0.446106	-1.16454	down
pmp000583	C22H20O12	Diosmetin-7-O-glucuronide	Flavonoids	Flavonoid	35110-20-4	B	972510	736570	309280	936910	1392900	269660	0.284821	1.28791	0.365034	insig
Lmmp003783	C21H18O13	Quercetin-3-O-glucuronide	Flavonoids	Flavonols	22688-79-5	B	4756500	4697400	3512000	3355000	5389100	4274100	0.0482448	1.00403	0.00580763	insig
Lmfn003760	C21H18O13	Quercetin-4′-O-glucuronide	Flavonoids	Flavonols	201463-36-7	A	3594500	2719900	1860300	2503900	2644300	2027100	0.40258	0.877745	-0.188127	insig
Hmjp003123	C21H18O13	Quercetin-5-O-glucuronide	Flavonoids	Flavonols	-	B	11353000	8410600	3516100	7848600	6085900	5736600	0.132135	0.844989	-0.242995	insig
Lmjp003044	C22H22O12	Isorhamnetin-3-O-Glucoside*	Flavonoids	Flavonols	5041-82-7	A	8450200	10174000	6486600	1548900	7953100	1102300	1.2865	0.4223	-1.24366	down
Hmcp002207	C22H22O12	Isorhamnetin-7-O-glucoside (Brassicin)*	Flavonoids	Flavonols	6743-96-0	A	8509400	9651600	6467100	1449400	8622200	1106000	1.24065	0.453856	-1.13969	down
Lmmn003398	C23H22O12	Kaempferol-3-O-(6''-acetyl)glucoside	Flavonoids	Flavonols	-	B	50225	3865.8	12380	3835.4	122270	6774.5	0.0883492	1.99907	0.99933	insig
HJAP135	C24H24O12	Pinocembrin-7-O-(6''-O-malonyl)glucoside	Flavonoids	Flavonoid	-	A	1848000	582400	426060	478060	2302900	634510	0.24564	1.1957	0.257856	insig
Hmln002199	C23H22O13	Quercetin-3-O-(6''-acetyl)galactoside	Flavonoids	Flavonols	-	B	67592	7041.6	14771	7365.7	67638	5893.7	0.246285	0.904846	-0.144256	insig
Li512111	C24H24O13	Isorhamnetin-3-O-(6''-acetylglucoside)	Flavonoids	Flavonols	-	B	7755.1	4139.9	6345.6	9	30461	9	1.03961	1.67094	0.740662	insig
pmp000587	C24H22O14	Luteolin-7-O-(6''-malonyl)glucoside	Flavonoids	Flavonoid	-	A	4384.7	9	9	9	9	9	0.842636	0.0061326	-7.34929	insig
Lmdp004892	C24H22O14	Kaempferol-3-O-(6''-malonyl)galactoside	Flavonoids	Flavonols	-	A	489890	68537	111390	28795	1320900	42974	0.155984	2.07918	1.05601	insig
pmb0608	C25H24O14	Chrysoeriol-7-O-(6''-malonyl)glucoside	Flavonoids	Flavonoid	-	A	67849	12990	15998	7539.2	76762	15857	0.121888	1.0343	0.0486502	insig
Hmln002189	C24H22O15	Quercetin-3-O-(6''-malonyl)galactoside	Flavonoids	Flavonols	-	A	154400	19356	25417	18505	196880	13633	0.0951277	1.14984	0.201439	insig
HJAP064	C25H24O15	Isorhamnetin-3-O-(6''-malonylglucoside)	Flavonoids	Flavonoid	-	B	119370	56628	63814	18145	332030	34330	0.20624	1.60336	0.681099	insig
Lmmp003306	C25H26O15	Quercetin-3-O-xylosyl(1→2)arabinoside	Flavonoids	Flavonols	-	A	1350600	1395700	1497800	1452400	1039500	1271300	1.05865	0.88669	-0.173499	insig
Zmxp005470	C26H26O15	Tricin-7-O-(6''-O-malonyl)glucoside	Flavonoids	Flavonoid	-	B	30219	18939	40047	7089.2	4198.4	20910	1.45789	0.360939	-1.47017	down
mws0047	C27H30O14	Apigenin-7-O-neohesperidoside (Rhoifolin)	Flavonoids	Flavonoid	17306-46-6	B	25498	39137	41737	17405	45029	19214	0.808008	0.76757	-0.381629	insig
Lmnp002741	C27H30O14	Genkwanin-6-C-(2''-O-apiosyl)glucoside	Flavonoids	Flavonoid carbonoside	-	B	9	9	9	18935	24944	18109	1.88469	2295.85	11.1648	up
HJAP148	C26H28O15	Kaempferol-3-O-sambubioside	Flavonoids	Flavonoid	27661-51-4	A	2856000	2148100	3888100	978140	904230	1788500	1.63857	0.412819	-1.27642	down
Hmgp003641	C28H32O14	Chrysoeriol-6-C-rhamnoside-7-O-rhamnoside	Flavonoids	Flavonoid	-	B	46335	65920	62663	57564	42199	100020	0.250736	1.14215	0.191755	insig
pmp001288	C28H32O14	Acacetin-7-O-rutinoside (Linarin)	Flavonoids	Flavonoid	480-36-4	A	1571300	2299800	2333700	1925200	1319900	3379700	0.00633087	1.06769	0.0944922	insig
mws1290	C30H26O13	Kaempferol-3-O-(6''-p-Coumaroyl)glucoside (Tiliroside)	Flavonoids	Flavonols	20316-62-5	B	61914	81648	75571	86115	13976	109650	0.531868	0.95714	-0.0631979	insig
Hmjn004446	C30H26O13	Luteolin-7-O-(6''-caffeoyl)rhamnoside	Flavonoids	Flavonoid	-	B	72288	39838	31910	43052	150390	73694	1.04676	1.85465	0.891145	insig
Lmsp004670	C27H30O15	Kaempferol-3-O-glucoside-7-O-rhamnoside	Flavonoids	Flavonols	-	A	1109400	872920	1527200	623410	969740	781200	1.29774	0.676546	-0.563741	insig
pmp001079	C27H30O15	Luteolin-7-O-neohesperidoside (Lonicerin)*	Flavonoids	Flavonoid	25694-72-8	A	91677	37728	23096	53170	156040	48280	0.8701	1.68845	0.755698	insig
pmp000593	C27H30O15	Luteolin-7-O-rutinoside*	Flavonoids	Flavonoid	3563-98-2	A	1127000	590300	345820	647920	1807900	522660	0.622715	1.44368	0.529749	insig
Lmjp002867	C27H30O15	Kaempferol-3-O-neohesperidoside*	Flavonoids	Flavonols	32602-81-6	A	1214700	873290	1701700	710610	1014700	856510	1.22605	0.681275	-0.553691	insig
Lmsn002815	C27H30O15	Kaempferol-3-O-rutinoside(Nicotiflorin)*	Flavonoids	Flavonoid	17650-84-9	A	1419100	1440300	3902500	1365500	2090200	2504400	0.133027	0.881424	-0.182092	insig
Zmcp003989	C27H30O15	Kaempferol-3-O-rhamnosyl(1→2)glucoside	Flavonoids	Flavonoid	-	A	86174	50820	39328	44181	67839	34199	0.473168	0.829273	-0.270082	insig
Lmjp002596	C26H28O16	Quercetin-3-O-sambubioside	Flavonoids	Flavonols	83048-35-5	A	1277100	1691200	1562700	1083400	1837200	1204200	0.513751	0.910351	-0.135505	insig
Lmtp004044	C26H28O16	Quercetin-3-O-apiosyl(1→2)galactoside	Flavonoids	Flavonols	-	B	36182000	38139000	36845000	29638000	33497000	24475000	1.48515	0.788101	-0.343548	insig
Hmjp003008	C27H28O16	Luteolin-7-O-glucuronide-5-O-rhamnoside	Flavonoids	Flavonoid	-	A	2260400	3708600	4167300	1885300	2808600	2007200	1.23503	0.661099	-0.597061	insig
pmp001080	C28H32O15	Diosmetin-7-O-Neohesperidoside (Neodiosmin)	Flavonoids	Flavonoid	38665-01-9	B	65406	64371	64426	35565	69047	30785	1.19263	0.697193	-0.52037	insig
Lmmp003091	C27H30O16	Quercetin-3-O-(4''-O-glucosyl)rhamnoside	Flavonoids	Flavonols	59262-54-3	B	267810	140220	179840	80259	195980	123660	1.0069	0.680251	-0.555861	insig
Lmsp004166	C27H30O16	Quercetin-3-O-glucoside-7-O-rhamnoside	Flavonoids	Flavonols	-	B	2888000	3555200	3076800	2766200	3670500	3090400	0.0494126	1.00075	0.00107556	insig
mws0059	C27H30O16	Quercetin-3-O-rutinoside (Rutin)	Flavonoids	Flavonols	153-18-4	A	1539300	1365500	1443300	1200600	1268100	1256900	1.68919	0.856834	-0.222912	insig
Lmbp002336	C27H30O16	Quercetin-3-O-(2''-O-rhamnosyl)galactoside	Flavonoids	Flavonols	-	B	8716800	9624600	9991800	8316000	9330300	9045200	0.902301	0.942057	-0.0861132	insig
Lmjp002461	C27H30O16	Quercetin-3-O-neohesperidoside	Flavonoids	Flavonols	117611-67-3	A	3211900	2848600	3083700	2722000	3642500	2801800	0.0212134	1.00242	0.00348255	insig
Lmyn001269	C27H30O16	Kaempferol-3-O-sophoroside	Flavonoids	Flavonoid	19895-95-5	B	729980	366930	383700	1157500	1102400	903600	1.6257	2.13662	1.09533	up
Hmjp002999	C28H32O16	Isorhamnetin-3-O-rutinoside (Narcissin)	Flavonoids	Flavonoid	604-80-8	B	3932600	4737400	2189000	1580000	5634500	1140200	0.680021	0.76938	-0.378231	insig
Zmxp002867	C28H32O16	Chrysoeriol-5,7-di-O-glucoside	Flavonoids	Flavonoid	-	B	213630	131050	132090	78538	88684	191810	0.877977	0.753051	-0.409181	insig
Lmsp004045	C28H32O16	Isorhamnetin-3-O-glucoside-7-O-rhamnoside	Flavonoids	Flavonols	-	A	13111	22721	29185	11578	30163	8430	0.679719	0.77166	-0.373963	insig
pme1540	C28H32O16	Isorhamnetin-3-O-neohesperidoside	Flavonoids	Flavonols	55033-90-4	A	24950	27518	23592	20545	49565	12666	0.132051	1.0883	0.122075	insig
pmp000596	C27H30O17	Quercetin-3-O-(2''-O-galactosyl)glucoside	Flavonoids	Flavonols	56782-99-1	A	23613	29449	23334	32368	9	36739	0.804814	0.904707	-0.144477	insig
Lmtp003677	C27H30O17	Quercetin-3-O-sophoroside (Baimaside)	Flavonoids	Flavonols	18609-17-1	B	96100	61466	49597	27636	27135	27068	1.71685	0.395046	-1.33991	down
Lmsp003729	C27H30O17	Myricetin-3-O-rutinoside	Flavonoids	Flavonols	-	B	208030	233110	389080	311020	273070	445350	0.762762	1.23996	0.310294	insig
Hmlp002975	C28H30O17	Isorhamnetin-3-O-glucuronide-7-O-rhamnoside	Flavonoids	Flavonols	-	B	100860	337700	241310	123760	300870	90901	0.485114	0.758279	-0.3992	insig
Lmmp002560	C27H28O18	Quercetin-3-O-(2''-O-glucosyl)glucuronide	Flavonoids	Flavonols	-	B	171140	146950	116410	82692	138410	102650	1.13879	0.745114	-0.424467	insig
Hmcp001578	C28H32O17	Isorhamnetin-3,7-O-diglucoside	Flavonoids	Flavonols	6758-51-6	B	94839	73497	82040	9	52571	13502	1.05156	0.263931	-1.92177	down
Lmmp003266	C29H30O19	Quercetin-3-O-(2''-malonyl)glucoside-7-O-arabinoside	Flavonoids	Flavonols	-	A	62213	24699	40980	17730	228090	46025	0.451805	2.28196	1.19028	insig
Xmyp004678	C32H38O19	Kaempferol-3-O-(2-O-Xylosyl-6-O-Rhamnosyl)Glucoside	Flavonoids	Flavonoid	-	A	132130	104560	60252	90046	134400	72358	0.116746	0.999535	-0.00067063	insig
Zmlp003063	C33H40O19	Luteolin-7-O-(2''-O-rhamnosyl)rutinoside	Flavonoids	Flavonoid	-	B	104550	71224	43086	54617	83577	35151	0.528952	0.792036	-0.336362	insig
Lmsp003881	C33H40O19	Kaempferol-3-O-rutinoside-7-O-rhamnoside	Flavonoids	Flavonols	-	A	3116600	2554300	2068500	1986500	3557000	1648700	0.355244	0.929297	-0.105789	insig
mws1035	C33H40O19	Kaempferol-3-O-robinoside-7-O-rhamnoside (Robinin)	Flavonoids	Flavonols	301-19-9	B	24653	46096	34375	22900	37074	32843	0.39051	0.882929	-0.179631	insig
HJAP061	C32H38O20	Quercetin-3-O-(2''-O-arabinosyl)rutinoside	Flavonoids	Flavonols	-	A	2580200	3001800	3113700	1745600	2663100	2473100	1.20848	0.791403	-0.337516	insig
Hmcp001618	C32H38O20	Quercetin-3-O-(2''-O-Xylosyl)rutinoside	Flavonoids	Flavonols	129235-39-8	B	57041	60481	42230	47131	60249	48097	0.0647955	0.97324	-0.0391328	insig
Hmqp002870	C32H38O20	Luteolin-7-O-Sophoroside-5-O-arabinoside	Flavonoids	Flavonoid	-	B	172370	138150	73848	81406	161400	54767	0.592223	0.774188	-0.369245	insig
Lmyp003857	C35H28O19	Kaempferol-3-O-(2'',6''-digalloyl)glucoside	Flavonoids	Flavonoid	-	B	360120	361510	319440	254090	377010	286800	0.859712	0.881689	-0.181658	insig
Lnrp102163	C33H40O20	Quercetin-3-O-rutinoside-7-O-rhamnoside	Flavonoids	Flavonols	-	A	36564	38499	31632	42399	41044	28042	0.229544	1.04489	0.063357	insig
pmp001105	C33H40O20	Kaempferol-3-O-neohesperidoside-7-O-glucoside	Flavonoids	Flavonols	-	A	110690	90687	155400	23542	13789	51384	1.67898	0.248657	-2.00777	down
Hmcp001559	C33H40O20	Isorhamnetin-3-O-rutinoside-7-O-arabinoside	Flavonoids	Flavonols	-	B	9	5522.5	6825.6	1235.5	6478.6	2916.3	0.576661	0.860267	-0.217144	insig
HJAP127	C33H40O20	Quercetin-3-O-(2''-O-Rhamnosyl)rutinoside	Flavonoids	Flavonols	55696-57-6	A	18992000	20721000	16026000	14230000	13578000	18546000	1.11989	0.831626	-0.265993	insig
Hmcp001329	C32H38O21	Quercetin-3-O-xylosyl(1→2)glucosyl(1→2)glucoside	Flavonoids	Flavonols	-	A	69218	121410	128180	47457	72213	51247	1.47289	0.536113	-0.899392	insig
Lmyp003588	C35H28O20	Quercetin-3-O-(2'',6''-digalloyl)-glucoside	Flavonoids	Flavonols	-	B	654300	679840	604060	580320	589070	518250	1.45916	0.870725	-0.19971	insig
HJAP128	C34H42O20	Isorhamnetin-3-O-rutinoside-7-O-rhamnoside	Flavonoids	Flavonoid	-	A	908160	1824600	1472100	925880	2773000	528480	0.299632	1.00535	0.00769921	insig
HJAP023	C33H40O21	Kaempferol-6,8-di-C-glucoside-7-O-glucoside	Flavonoids	Flavonoid	-	B	28264	33360	51881	18857	3558.6	50136	0.965279	0.639193	-0.645677	insig
Hmcp001589	C34H42O21	Isorhamnetin-3-O-rutinoside-4'-O-glucoside	Flavonoids	Flavonols	111393-97-6	B	77359	125950	152080	3942.4	63337	18936	1.39718	0.242594	-2.04338	down
Lmhp003162	C34H42O21	Chrysoeriol-6,8-di-C-glucoside-4'-O-glucoside	Flavonoids	Flavonoid	-	B	17662	41451	64307	6678.5	9	9	1.54442	0.0542578	-4.20403	down
pmb0676	C38H40O19	Chrysoeriol-8-C-glucoside-7-O-(6''-feruloyl)glucoside	Flavonoids	Flavonoid carbonoside	-	B	143700	93705	109830	45635	37014	45818	1.82191	0.369971	-1.43451	down
Lmhp002374	C39H50O25	Quercetin-3-O-glucosyl(1→4)rhamnoside-7-O-rutinoside	Flavonoids	Flavonols	-	B	141210	67296	64886	101190	61971	119250	0.165381	1.03299	0.0468253	insig
HJAP123	C40H52O25	Isorhamnetin-3-O-rutinoside-7-O-rutinoside	Flavonoids	Flavonoid	-	A	56248	89822	77793	35345	83954	38020	1.00682	0.702747	-0.508923	insig
mws0987	C10H8O2	6-MethylCoumarin	Lignans and Coumarins	Coumarins	92-48-8	B	4428.7	8670.2	8320.9	6754.9	8426.4	6045.7	0.116963	0.990999	-0.0130445	insig
mws1013	C9H6O4	Esculetin	Lignans and Coumarins	Coumarins	305-01-1	A	48774	8958.7	9	64354	74896	50241	1.12561	3.2817	1.71444	up
Hmjp002337	C10H8O4	Isoscopoletin (6-Hydroxy-7-Methoxycoumarin)	Lignans and Coumarins	Coumarins	776-86-3	B	135720	119720	52650	183050	126020	192400	1.24139	1.62767	0.702812	insig
Cmpp003619	C10H8O4	6,7-Dihydroxy-4-methylcoumarin	Lignans and Coumarins	Coumarins	529-84-0	B	168520	187470	69897	379010	182100	253060	1.2909	1.9117	0.934859	insig
pme2993	C10H8O4	Scopoletin (7-Hydroxy-5-methoxycoumarin)	Lignans and Coumarins	Coumarins	92-61-5	B	158720	109220	55806	258370	144600	216710	1.35007	1.91409	0.936661	insig
mws4173	C11H10O4	5,7-Dimethoxycoumarin (Limettin)(Citropten)	Lignans and Coumarins	Coumarins	487-06-9	B	251740	316390	178720	336350	14184	195490	0.817503	0.731103	-0.451854	insig
mws1014	C10H8O5	Fraxetin (7,8-Dihydroxy-6-methoxycoumarin)	Lignans and Coumarins	Coumarins	574-84-5	B	578930	552520	178870	499770	491670	564640	0.729176	1.18756	0.247997	insig
Cmpp007319	C15H16O4	7-Methoxy-5-Prenyloxycoumarin	Lignans and Coumarins	Coumarins	35590-41-1	A	2519.9	2511.5	2652.5	1983	2827.9	2214.8	0.769894	0.91434	-0.129197	insig
pmb0382	C19H14O6	O-Feruloyl 4-hydroxycoumarin	Lignans and Coumarins	Coumarins	-	B	648200	758250	617760	828820	1147500	1129100	1.66367	1.53414	0.617429	insig
mws1015	C15H16O9	Esculin (6,7-DihydroxyCoumarin-6-glucoside)	Lignans and Coumarins	Coumarins	531-75-9	A	839310	827350	942320	1055400	537830	1333900	0.115609	1.12194	0.166001	insig
mws1077	C16H18O9	Scopoletin-7-O-glucoside (Scopolin)	Lignans and Coumarins	Coumarins	531-44-2	A	24587	32794	36514	14810	9139.3	42200	0.975216	0.704503	-0.505322	insig
Lmgp003270	C16H16O10	Scopoletin-7-O-glucuronide	Lignans and Coumarins	Coumarins	132752-65-9	B	144150	107590	46467	82367	99306	60516	0.257643	0.812151	-0.300181	insig
pmn001663	C22H26O8	Syringaresinol	Lignans and Coumarins	Lignans	21453-69-0	B	1694.7	3015.4	1459.8	1399.3	982.26	2047.1	0.856963	0.717785	-0.478377	insig
HJN054	C25H34O10	Secoisolariciresinol-9'-O-xyloside	Lignans and Coumarins	Lignans	-	B	130310	79304	169590	143310	51277	280370	0.0311171	1.25251	0.324823	insig
Lmdn001925	C26H34O12	Olivil-4'-O-glucoside	Lignans and Coumarins	Lignans	76880-93-8	B	65810	55808	77408	80883	77476	90247	1.33955	1.24911	0.320904	insig
Rfmb25702	C28H34O12	Pinoresinol-4-O-(6''-acetyl)glucoside	Lignans and Coumarins	Lignans	-	B	15096	3268.3	5226.5	12264	47544	7926	1.07718	2.8712	1.52166	up
Rfmb26201	C30H38O14	Syringaresinol-4'-O-(6''-acetyl)glucoside	Lignans and Coumarins	Lignans	-	B	59696	18099	21422	6616.5	17996	11102	1.32399	0.359964	-1.47408	down
pmn001370	C32H42O16	Pinoresinol-4,4'-O-di-O-glucoside	Lignans and Coumarins	Lignans	63902-38-5	B	95919	202790	171460	124610	133250	170220	0.194659	0.910481	-0.135299	insig
pmn001368	C32H44O17	Olivil-4,4'-Di-O-glucoside	Lignans and Coumarins	Lignans	-	B	92508	105090	92099	56744	45499	57967	1.80816	0.553026	-0.854581	insig
pma0134	C4H8O4	D-(-)-Threose	Others	Saccharides and Alcohols	95-43-2	B	85721	80394	48872	137290	153030	126410	1.68959	1.9384	0.954864	insig
mws0133	C6H6N2O	Nicotinamide	Others	Vitamin	98-92-0	A	2506500	2498400	2808400	2631100	3179500	3079400	1.26761	1.1378	0.186251	insig
pme0490	C6H5NO2	Nicotinic acid (Vitamin B3)	Others	Vitamin	59-67-6	B	241350	212380	208670	284750	265870	508740	1.33337	1.59928	0.677418	insig
pmp000509	C6H6O3	Maltol	Others	Others	118-71-8	B	9	9	9	58213	67571	55135	1.88456	6700.7	12.7101	up
mws0889	C4H8O5	D-Threonic Acid	Others	Saccharides and Alcohols	3909-12-4	A	2366500	1096400	704680	1246400	1635300	1250400	0.319284	0.991487	-0.0123347	insig
pmb0764	C6H9NOS	4-Methyl-5-thiazoleethanol	Others	Others	137-00-8	B	5622	10578	4681.1	7887.7	11522	8794	1.09528	1.35068	0.433687	insig
ML10171848	C5H8O5	D-Arabinono-1,4-lactone	Others	Saccharides and Alcohols	2782-09-4	A	101440	73434	47822	65732	85105	68175	0.148308	0.983457	-0.0240657	insig
Zmgn000173	C5H10O5	D-Ribose	Others	Saccharides and Alcohols	50-69-1	B	170180	143130	127110	127260	231380	123680	0.282343	1.09514	0.131111	insig
mws1499	C5H10O5	D-Arabinose	Others	Saccharides and Alcohols	10323-20-3	B	431840	338760	221100	210680	310990	363030	0.319462	0.892104	-0.164715	insig
pme0513	C5H12O5	Xylitol	Others	Saccharides and Alcohols	87-99-0	A	23463	18666	18941	11706	4493.4	29442	0.885572	0.747362	-0.420121	insig
mws0437	C5H12O5	D-Arabitol	Others	Saccharides and Alcohols	488-82-4	A	68778	59127	51070	28741	34163	59449	1.24671	0.683632	-0.548709	insig
pme2529	C6H12O5	1,5-Anhydro-D-glucitol	Others	Saccharides and Alcohols	154-58-5	B	59476	58722	49760	85192	61597	38728	0.209178	1.10454	0.143451	insig
Zmjp000624	C8H9NO3	Pyridoxal	Others	Vitamin	66-72-8	A	95589	134070	130630	116980	151530	79029	0.228708	0.964612	-0.0519797	insig
pme1383	C8H11NO3	Pyridoxine	Others	Vitamin	65-23-6	A	256620	881100	851220	738930	401200	780400	0.10644	0.965605	-0.0504953	insig
Zmzn000078	C3H7O6P	Dihydroxyacetone phosphate	Others	Saccharides and Alcohols	57-04-5	B	109810	166680	78227	145540	100610	123160	0.33788	1.04114	0.0581639	insig
MA10039492	C6H6O6	Dehydroascorbic acid	Others	Vitamin	490-83-5	A	1105500	1020600	647410	966370	1189100	790590	0.395225	1.06221	0.0870739	insig
mws4175	C6H8O6	D-Glucurono-6,3-lactone	Others	Saccharides and Alcohols	32449-92-6	B	3075800	2590400	2493600	1925400	2644200	2078100	1.23292	0.814689	-0.295679	insig
Hmfn000531	C6H8O6	L-Ascorbic acid (Vitamin C)	Others	Vitamin	50-81-7	A	4510100	3677200	2627200	3706000	5240000	4007600	0.915281	1.1978	0.260386	insig
pme1021	C6H10O6	D-Glucono-1,5-lactone	Others	Saccharides and Alcohols	90-80-2	B	20530	14304	20639	8423.4	7815.6	11524	1.71694	0.500478	-0.998622	insig
pmb0786	C6H13NO5	D-Glucosamine	Others	Saccharides and Alcohols	3416-24-8	B	92873	43459	79017	104880	83641	78113	0.806873	1.23815	0.308184	insig
pme0516	C6H12O6	Inositol	Others	Saccharides and Alcohols	87-89-8	B	152280	155140	95749	64385	111060	83292	1.27314	0.641758	-0.639898	insig
mws1164	C6H12O6	D-Fructose*	Others	Saccharides and Alcohols	7660-25-5	A	1701000	1186500	864690	734900	1069500	1273200	0.604673	0.820214	-0.285927	insig
mws4170	C6H12O6	D-Glucose*	Others	Saccharides and Alcohols	14431-43-7	A	1867800	935860	939070	563410	1202300	1449800	0.401095	0.859135	-0.219043	insig
mws0214	C6H14O6	D-Sorbitol	Others	Saccharides and Alcohols	50-70-4	B	14724	13641	7515.9	8671.1	12589	15638	0.202699	1.02835	0.0403305	insig
pme2237	C6H14O6	Dulcitol	Others	Saccharides and Alcohols	608-66-2	B	8973.3	11774	12801	12436	10844	12953	0.599567	1.08002	0.111065	insig
pme2596	C8H9NO4	4-Pyridoxic acid	Others	Vitamin	82-82-6	A	212160	282480	258200	224750	184000	312310	0.329556	0.957787	-0.062224	insig
Zmgn000447	C3H7O7P	3-Phospho-D-glyceric acid	Others	Saccharides and Alcohols	820-11-1	B	391760	518150	617290	1096500	460190	2081600	1.12202	2.38233	1.25237	up
pme3705	C6H10O7	D-Glucoronic acid*	Others	Saccharides and Alcohols	6556-12-3	B	16262	12937	6114.3	42061	63342	59161	1.77364	4.66011	2.22037	up
pme0534	C6H12O7	Gluconic acid	Others	Saccharides and Alcohols	526-95-4	A	192830	137500	80515	64319	157470	45775	0.880308	0.651253	-0.61871	insig
Zmzn000079	C4H9O7P	D-Erythrose-4-phosphate	Others	Saccharides and Alcohols	585-18-2	B	51615	76460	65221	91017	91976	122780	1.58839	1.58189	0.661649	insig
pme1261	C9H19NO4	D-Panthenol	Others	Saccharides and Alcohols	81-13-0	B	23540	56027	249990	117220	69573	5385.5	0.543992	0.583142	-0.778081	insig
Zmyn000108	C6H10O8	D-Saccharic acid*	Others	Saccharides and Alcohols	87-73-0	A	790330	721740	619290	665090	776820	620420	0.249775	0.967612	-0.0474991	insig
Zmpn000199	C6H10O8	D-Galactaric acid*	Others	Saccharides and Alcohols	526-99-8	A	848290	844950	649450	600090	756270	671780	0.944073	0.865731	-0.208009	insig
Hmcn000192	C7H14O7	Sedoheptulose	Others	Saccharides and Alcohols	3019-74-7	A	533010	552570	341790	374780	374840	479840	0.620813	0.861346	-0.215335	insig
mws1337	C9H17NO5	D-Pantothenic Acid	Others	Vitamin	79-83-4	A	893310	2064200	1130900	1305100	886750	1971400	0.0999516	1.01831	0.0261703	insig
Hmyp002656	C11H11NO4	Methyl dioxindole-3-acetate	Others	Others	57061-18-4	A	21841	16561	9387.4	14157	9056.4	7915.1	1.02115	0.651368	-0.618455	insig
mws4174	C8H15NO6	N-Acetyl-D-mannosamine	Others	Saccharides and Alcohols	7772-94-3	B	33996	31537	14823	16316	16840	26875	0.671669	0.747063	-0.420698	insig
mws2608	C8H15NO6	N-Acetyl-D-galactosamine	Others	Saccharides and Alcohols	1811-31-0	B	18292	20631	14248	11162	7546.2	16073	1.28936	0.654139	-0.612332	insig
pme2755	C8H15NO6	N-Acetyl-D-glucosamine	Others	Saccharides and Alcohols	7512-17-6	B	142380	129800	152730	129870	149690	131690	0.474789	0.967852	-0.0471416	insig
pme2266	C10H16N2O3S	Biotin	Others	Vitamin	58-85-5	B	195930	277940	199760	157130	201120	233730	0.640301	0.878791	-0.186408	insig
pma3101	C11H14NO6+	Nicotinate D-ribonucleoside	Others	Vitamin	17720-18-2	B	635630	465030	314860	415140	429740	432410	0.243662	0.902347	-0.148246	insig
Zmyn000110	C6H14NO8P	D-Glucosamine 1-phosphate	Others	Saccharides and Alcohols	2152-75-2	B	22674	52516	17403	49390	59815	37133	1.20964	1.58044	0.660329	insig
mws1090	C6H13O9P	Glucose-1-phosphate*	Others	Saccharides and Alcohols	59-56-3	A	2166400	2094800	1807300	2955400	2474700	3068600	1.67584	1.40046	0.485902	insig
mws0866	C6H13O9P	D-Glucose 6-phosphate*	Others	Saccharides and Alcohols	56-73-5	A	2396600	2778900	1845100	3678500	2685400	3851900	1.43267	1.45512	0.541136	insig
pme3313	C6H13O9P	D-Fructose 6-phosphate*	Others	Saccharides and Alcohols	643-13-0	A	330910	412450	346660	599510	349430	863050	1.1824	1.66235	0.73322	insig
Zmpn000095	C6H15O9P	Sorbitol-6-phosphate	Others	Saccharides and Alcohols	20479-58-7	B	40062	75636	28531	31862	59575	29370	0.289296	0.837605	-0.255657	insig
mws1038	C11H22N2O4S	Pantetheine	Others	Others	496-65-1	B	11822	9205	5680.7	5072.3	11628	4125.6	0.651286	0.779771	-0.358877	insig
pme3163	C7H15O10P	D-Sedoheptuiose 7-phosphate	Others	Saccharides and Alcohols	2646-35-7	B	1088900	493210	404400	594410	671060	512010	0.0409687	0.894775	-0.160403	insig
pme2816	C20H28O2	4-Oxoretinol	Others	Vitamin	62702-55-0	B	1841.5	3001.1	4226.4	4484.9	3761.1	6391.2	1.22252	1.61398	0.690624	insig
pmb0789	C14H21NO8	Pyridoxine-5'-O-glucoside	Others	Vitamin	-	B	177660	175400	168530	192060	250120	229680	1.6162	1.2881	0.365244	insig
pme3311	C6H14O12P2	D-Fructose-1,6-biphosphate	Others	Saccharides and Alcohols	488-69-7	B	33958	47510	25859	32944	32349	36061	0.074257	0.944348	-0.08261	insig
Zmyn000083	C6H14O12P2	D-Glucose 1,6-bisphosphate	Others	Saccharides and Alcohols	10139-18-1	B	22279	31856	24009	27691	24768	27183	0.282846	1.01917	0.0273943	insig
mws1080	C12H22O11	Galactinol	Others	Saccharides and Alcohols	3687-64-7	A	2051400	1687900	1419300	1047800	1290400	2055200	0.709623	0.851665	-0.231642	insig
Lmsn000381	C12H22O11	D-Maltose*	Others	Saccharides and Alcohols	133-99-3	A	1538900	1003100	845450	815030	768470	1427200	0.430292	0.888781	-0.170101	insig
mws5038	C12H22O11	Isomaltulose*	Others	Saccharides and Alcohols	13718-94-0	A	1486000	1135300	1025800	910580	758570	1447600	0.725659	0.854583	-0.226707	insig
mws0264	C12H22O11	D-Trehalose*	Others	Saccharides and Alcohols	99-20-7	A	799300	426500	453160	324420	426390	700200	0.468075	0.864231	-0.21051	insig
pme0519	C12H22O11	D-Sucrose*	Others	Saccharides and Alcohols	57-50-1	A	895510	835780	808190	556120	606250	1065200	0.730475	0.877176	-0.189062	insig
pmb0801	C14H19NO9	4-Pyridoxic acid-O-glucoside	Others	Vitamin	-	A	69396	64937	77846	56537	51851	103740	0.228606	0.99976	-0.000346812	insig
mws5040	C12H21O11Na	Turanose	Others	Saccharides and Alcohols	547-25-1	B	603550	609790	547740	327580	259620	985720	0.638516	0.893156	-0.163015	insig
mws0232	C17H20N4O6	Riboflavin (Vitamin B2)	Others	Vitamin	83-88-5	A	1891300	1243400	923350	862280	1667300	787450	0.563562	0.817395	-0.290895	insig
mws2523	C12H23O14P	Trehalose 6-phosphate	Others	Saccharides and Alcohols	4484-88-2	B	13200	6757.6	3554.1	6087.5	7927.5	6000.7	0.0271665	0.851308	-0.232247	insig
pme1014	C31H40O2	Menatetrenone (Vitamin K2)	Others	Vitamin	11032-49-8	B	47736	65311	45684	49916	70458	53101	0.607722	1.09289	0.128144	insig
pmp001282	C28H50NO7P	Propyl 2-(trimethylammonio)ethyl phosphate	Others	Others	-	A	890910	729420	910980	998790	584130	485590	0.938538	0.81717	-0.291292	insig
mws0024	C7H6O5	Gallic acid	Tannins	Tannin	149-91-7	B	65997	39656	46997	52532	42459	55358	0.0344144	0.984926	-0.0219123	insig
Lmfp001509	C13H16O9	1-O-Galloyl-rhamnose	Tannins	Tannin	-	B	22062	20897	24081	30082	20031	37213	0.957983	1.3026	0.381389	insig
pmn001513	C14H10O9	Digallic Acid	Tannins	Tannin	536-08-3	B	3664.8	4500.5	5478	13681	8845.1	8127.7	1.66394	2.2468	1.16787	up
Lmfn000604	C13H16O10	6-O-Galloyl-D-glucose	Tannins	Tannin	13186-19-1	A	181460	241110	224390	176610	164410	218710	0.97065	0.865169	-0.208945	insig
pmn001518	C13H16O10	1-O-Galloyl-D-glucose	Tannins	Tannin	58511-73-2	A	639340	359880	316090	424250	593630	361090	0.297701	1.0484	0.0681882	insig
Hmln000873	C13H16O10	2-O-Galloyl-D-glucose	Tannins	Tannin	-	B	809290	520460	410000	532750	731440	569280	0.392843	1.05387	0.0756967	insig
Lmsp005625	C22H18O13	3-O-Methylellagic acid-4'-O-(5''-O-acetyl)arabinoside	Tannins	Tannin	-	B	9	3511.5	9	9	9	9	0.785436	0.00764981	-7.03036	insig
pmb0782	C5H11N	Piperidine	Alkaloids	Alkaloids	110-89-4	B	6647500	5651100	4543000	6276500	5844700	4164800	0.178626	0.96701	-0.0483969	insig
pme2292	C4H12N2	Putrescine	Alkaloids	Phenolamine	110-60-1	B	18474	24507	22325	56923	83770	15628	1.04224	2.39367	1.25922	up
pme1841	C5H14N2	Cadaverine	Alkaloids	Phenolamine	462-94-2	B	11250	10097	10076	14433	17881	14749	1.77357	1.49772	0.582772	insig
pmb0484	C5H13NO	Choline	Alkaloids	Alkaloids	62-49-7	B	15254000	15319000	14851000	16618000	7203200	5506500	1.22713	0.645643	-0.631191	insig
pmb1096	C8H7N	Indole	Alkaloids	Plumerane	120-72-9	A	14107	14400	8945.3	10583	7906.4	11409	0.8964	0.798306	-0.324986	insig
mws0191	C5H11NO2	Betaine	Alkaloids	Alkaloids	107-43-7	A	680220	594730	596570	593450	694630	554420	0.180417	0.984494	-0.0225458	insig
pmp001287	C8H9N	N-Benzylmethylene isomethylamine	Alkaloids	Alkaloids	-	A	15297000	11142000	6170700	15466000	9063900	6695400	0.0810207	0.957546	-0.0625857	insig
mws0491	C8H11N	Phenethylamine	Alkaloids	Alkaloids	64-04-0	A	16134000	7601900	3274900	12793000	37451000	9893000	1.09517	2.22641	1.15472	up
pmp001198	C6H13NO2	6-Deoxyfagomine	Alkaloids	Alkaloids	197449-09-5	A	8681500	7026400	5326300	7977700	7458800	5366000	0.00217887	0.988985	-0.01598	insig
HJKP000649	C8H9NO	N-benzylformamide	Alkaloids	Alkaloids	6343-54-0	B	2106000	1579600	1107500	1931300	1545400	1137600	0.0836646	0.962696	-0.0548472	insig
pme2268	C7H7NO2	Trigonelline	Alkaloids	Alkaloids	535-83-1	A	19080000	19349000	19069000	28469000	19989000	31950000	1.37969	1.39845	0.483827	insig
mws0146	C7H7NO2	Nicotinic Acid Methyl Ester(Methyl Nicotinate)	Alkaloids	Alkaloids	93-60-7	B	88681	88258	50946	158260	64699	126960	0.970148	1.53551	0.618715	insig
pma0948	C8H11NO	Phenylethanolamine	Alkaloids	Alkaloids	7568-93-6	B	978610	1019600	524410	1808300	2094400	1612600	1.68192	2.18634	1.12852	up
pme1137	C6H5NO3	6-Hydroxynicotinic acid	Alkaloids	Alkaloids	5006-66-6	B	132180	83059	42942	17810	33155	25654	1.5461	0.296765	-1.75261	down
mws0704	C2H8NO4P	O-Phosphorylethanolamine	Alkaloids	Alkaloids	1071-23-4	B	29768	48349	33072	39262	27512	64017	0.405559	1.17629	0.234249	insig
pma2987	C6H11N3O	Histidinol	Alkaloids	Alkaloids	501-28-0	B	6047000	6062900	6326800	6040400	5627000	5959100	1.28742	0.956055	-0.0648344	insig
mws0103	C9H7NO	Indole-3-carboxaldehyde	Alkaloids	Plumerane	487-89-8	B	57124	72457	81552	70120	61536	90863	0.265991	1.05393	0.0757764	insig
pme1691	C7H16NO2	Acetylcholine	Alkaloids	Alkaloids	60-31-1	B	53083	62000	49475	45628	50168	79075	0.208079	1.06267	0.0876949	insig
Lmgp000796	C8H7NO2	4-Hydroxymandelonitrile	Alkaloids	Alkaloids	13093-65-7	A	6298400	7621000	5490200	6722300	5312700	5762600	0.593739	0.916948	-0.125088	insig
pmb0819	C10H8N2	3-Indoleacetonitrile	Alkaloids	Plumerane	771-51-7	B	25665	31460	15977	31073	26455	21278	0.463125	1.07803	0.108395	insig
mws0005	C10H12N2	Tryptamine	Alkaloids	Plumerane	61-54-1	A	1286800	1859100	2323700	622890	1305300	769120	1.48113	0.493146	-1.01991	down
mws1417	C9H7NO2	Indole-3-carboxylic acid	Alkaloids	Plumerane	771-50-6	B	21322	30429	27112	27348	20283	30412	0.097292	0.989602	-0.0150794	insig
mws1346	C6H11NO4	DL-2-Aminoadipic acid	Alkaloids	Alkaloids	542-32-5	B	141440	147510	90846	160930	160280	126610	0.925621	1.17911	0.237694	insig
pmb0037	C10H15NO	Hordenine	Alkaloids	Alkaloids	539-15-1	B	197280	345100	302320	1304600	887330	1576100	1.79011	4.46079	2.1573	up
Hmtp000776	C8H9NO3	4,5,6-Trihydroxy-2-cyclohexen-1-ylideneacetonitrile	Alkaloids	Alkaloids	-	B	640430	434830	239430	624710	352630	247380	0.144801	0.931566	-0.102271	insig
pme1651	C10H9NO2	Indole 3-acetic acid (IAA)	Alkaloids	Plumerane	87-51-4	B	20544	17709	13801	18744	15868	8937	0.71226	0.836612	-0.257369	insig
pmb0774	C10H12N2O	N-Hydroxytryptamine*	Alkaloids	Phenolamine	-	A	787860	716050	1589800	237660	463180	400580	1.59803	0.356019	-1.48997	down
pme2024	C10H12N2O	Serotonin*	Alkaloids	Plumerane	50-67-9	A	1030200	1060500	2053200	255240	561950	490510	1.63866	0.315572	-1.66396	down
Zmtn001624	C10H7NO3	N-Acetylisatin	Alkaloids	Plumerane	574-17-4	A	174350	151290	93713	744650	770610	735130	1.85251	5.36634	2.42394	up
mws0018	C10H26N4	Spermine	Alkaloids	Phenolamine	71-44-3	B	5712000	5916700	5775100	5242800	5429900	5871700	1.0998	0.95062	-0.0730594	insig
pmb0818	C11H11NO3	Methoxyindoleacetic acid	Alkaloids	Plumerane	3471-31-6	B	590160	490690	238300	604010	518480	445330	0.749635	1.18851	0.249151	insig
mws0677	C12H14N2O2	N-Acetyl-5-hydroxytryptamine	Alkaloids	Alkaloids	1210-83-9	B	56401	149820	117200	172440	117360	118860	0.792296	1.26355	0.337488	insig
Lmlp003161	C14H20N2O3	N-Feruloylputrescine	Alkaloids	Phenolamine	501-13-3	B	24220	16554	12102	11851	4400.5	7948.2	1.44602	0.457669	-1.12762	down
pmp001252	C17H17NO3	p-Coumaroyltyramine	Alkaloids	Phenolamine	36417-86-4	B	9	9	9	9	9	8859.8	0.835768	328.807	8.3611	insig
Lmtp001399	C14H17NO7	5,6-Dihydroxyindole-5-O-β-glucoside	Alkaloids	Alkaloids	-	B	9	9	9	187710	253940	178680	1.88469	22975.2	14.4878	up
mws1433	C18H19NO4	N-Feruloyltyramine	Alkaloids	Phenolamine	66648-43-9	A	512310	853690	197940	471230	386380	144850	0.573784	0.640984	-0.64164	insig
mws0983	C20H39NO2	N-Oleoylethanolamine	Alkaloids	Alkaloids	111-58-0	B	38008	35943	42353	28481	33859	26513	1.59079	0.763972	-0.388408	insig
pmb0776	C20H20N2O3	N-Feruloyltryptamine	Alkaloids	Phenolamine	53905-13-8	A	7493.9	9571.3	20198	1379.6	2200.3	1038.1	1.77891	0.123929	-3.01241	down
pmb2211	C19H38N2O3	Cocamidopropyl betaine	Alkaloids	Alkaloids	4292-10-8	A	23104	23151	47341	36981	37110	58968	1.01219	1.42163	0.507547	insig
HJAP050	C19H21NO5	N-Feruloyl-3-methoxytyramine	Alkaloids	Phenolamine	78510-19-7	A	48173	257890	313710	9	129070	9	1.30995	0.208283	-2.26339	down
pmb0770	C20H20N2O4	N-Feruloylserotonin	Alkaloids	Phenolamine	68573-23-9	B	9	139370	9	9	9	9	0.785436	0.000193704	-12.3339	insig
Lmlp003024	C20H30O7N4	N'-p-Coumaroylagmatine-glucoside	Alkaloids	Phenolamine	-	B	15073	9	9	10420	9	9	0.0608522	0.691671	-0.531843	insig
Lmhp005872	C25H30N2O6	Diferuloylcadaverine	Alkaloids	Phenolamine	-	B	9	9	7312	2599.3	20350	5720.5	1.2604	3.9113	1.96765	up
pmb1912	C20H23N7O7	10-Formyltetrahydrofuran	Alkaloids	Alkaloids	2800-34-2	B	145890	68623	70526	110790	110060	94447	0.578135	1.10615	0.145552	insig
mws1138	C24H26N2O13	Betanin (Betanidin-5-O-glucoside)	Alkaloids	Alkaloids	7659-95-2	B	49413	17899	5337	14514	131880	22748	0.755107	2.32821	1.21922	insig
pmb0492	C34H37N3O6	N',N'',N'''-p-Coumaroyl-cinnamoyl-caffeoyl spermidine	Alkaloids	Phenolamine	-	B	178750	119780	61219	79690	98413	52834	0.837064	0.641939	-0.639491	insig
Lmqn000780	C17H27N3O17P2	Uridine 5'-diphospho-N-acetylglucosamine	Alkaloids	Alkaloids	528-04-1	B	26592	25489	16462	30590	32579	24119	1.14696	1.27348	0.348774	insig
Lmlp002205	C11H16O3	Isololiolide	Terpenoids	Terpene	38274-00-9	B	32780	30471	21923	28981	14605	20800	1.03777	0.755935	-0.403666	insig
Hmgp005956	C13H18O3	Dehydrovomifoliol	Terpenoids	Monoterpenoids	15764-81-5	B	86824	74431	64167	50655	81854	82960	0.263966	0.955847	-0.065148	insig
mws4053	C30H48O3	Ursolic acid	Terpenoids	Triterpene	77-52-1	B	8129.3	9260.4	9070.6	8939	8101	9370	0.054318	0.998099	-0.00274512	insig
Lmsn012425	C30H48O4	Rubusic acid (3β,7α-Dihydroxyolean-12-en-28-oic acid)	Terpenoids	Triterpene	23984-26-1	A	6065.3	3017.9	6308.9	1991.1	679.05	1190.7	1.68871	0.250833	-1.9952	down
Lmsn009589	C30H48O6	2α,3β,19α,23-Tetrahydroxyurs-12-en-28-oic acid	Terpenoids	Triterpene	-	B	3662.4	1979.9	1258.9	1659	3013.1	662.43	0.52661	0.772986	-0.371486	insig
Lmmn004145	C38H60O10	3-O-(2-O-Acetyl-glucosyl)oleanolic acid	Terpenoids	Triterpene	-	A	5443800	5071100	5486300	4118700	3912000	1448400	1.27078	0.592399	-0.755358	insig
Lmsn006130	C36H56O12	2α,3β,19α-Trihydroxyurs-12-en-23,28-dioic acid-28-O-glucoside	Terpenoids	Triterpene	-	A	19495	29105	29544	22125	18484	19592	1.22844	0.770385	-0.376348	insig
pmn001505	C41H64O13	Oleanolic acid-3-O-xylosyl(1→3)glucuronide	Terpenoids	Triterpene	-	A	44219	33019	40158	35077	24608	8953.1	1.19564	0.584672	-0.774302	insig
pme2601	C3H6O3	3-Hydroxypropanoic acid	Organic acids	Organic acids	503-66-2	B	44275	30196	15535	25612	36795	19705	0.0412182	0.912295	-0.132428	insig
Lmqp000873	C4H4O3	Succinic anhydride	Organic acids	Organic acids	108-30-5	B	2383500	1494700	1156600	1797700	2679000	1261200	0.433138	1.13965	0.188588	insig
mws4052	C4H7NO2	1-Aminocyclopropane-1-carboxylic acid	Organic acids	Organic acids	22059-21-8	B	492820	519960	474420	458700	523750	583390	0.615403	1.05288	0.0743381	insig
pme3011	C4H9NO2	γ-Aminobutyric acid	Organic acids	Organic acids	56-12-2	B	436970	450690	348680	788930	366900	522220	0.898503	1.35727	0.44071	insig
ML10172161	C3H4O4	Hydroxypyruvic acid	Organic acids	Organic acids	1113-60-6	B	397220	612030	430840	452180	565910	453150	0.280419	1.02163	0.0308736	insig
mws0576	C4H8O3	3-Hydroxybutyric acid	Organic acids	Organic acids	300-85-6	B	381320	519540	327900	389400	417870	169680	0.730666	0.79507	-0.330847	insig
mws0574	C4H8O3	2-Hydroxyisobutyric acid	Organic acids	Organic acids	594-61-6	A	2112000	2140400	2035000	1916000	1566700	1494400	1.5905	0.791599	-0.337158	insig
pme1975	C3H4O4	Malonic acid	Organic acids	Organic acids	141-82-2	B	1200500	1522100	1122000	1199300	1828500	1512200	0.946264	1.18088	0.239859	insig
pme0048	C2H7NO2S	2-Aminoethanesulfinic acid	Organic acids	Organic acids	300-84-5	B	3204.9	1900.1	9	639.91	2847.6	2532.5	0.735791	1.17716	0.235314	insig
mws0376	C4H4O4	Fumaric acid	Organic acids	Organic acids	110-17-8	B	52380	40026	20725	57699	54767	20551	0.323283	1.17578	0.233616	insig
pme0275	C5H8O3	4-Oxopentanoic Acid	Organic acids	Organic acids	123-76-2	B	4741.2	6876.6	7913	10206	10116	5680.1	0.907796	1.33134	0.412877	insig
mws0823	C5H8O3	3-Methyl-2-Oxobutanoic acid	Organic acids	Organic acids	759-05-7	B	22968	49129	28496	40952	52940	28349	0.711151	1.2152	0.281198	insig
pme1730	C4H6O4	D-Erythronolactone	Organic acids	Organic acids	15667-21-7	B	1051000	622680	507720	511290	828240	562560	0.346671	0.871958	-0.197669	insig
mws0470	C4H6O4	Methylmalonic acid*	Organic acids	Organic acids	516-05-2	A	6805900	4012500	3085300	5381600	8348400	3406800	0.555601	1.23254	0.301629	insig
mws0192	C4H6O4	Succinic acid*	Organic acids	Organic acids	110-15-6	A	6890600	4075700	3066700	5487400	8338500	3443700	0.560887	1.23064	0.299411	insig
mws0147	C5H10O3	β-Hydroxyisovaleric acid	Organic acids	Organic acids	625-08-1	B	471020	629920	315050	463520	508910	224180	0.47113	0.84507	-0.242858	insig
pme3096	C3H5NO4	Aminomalonic acid	Organic acids	Organic acids	1068-84-4	B	6161700	3825900	2896000	4978400	7564400	3194900	0.554182	1.22153	0.288689	insig
pme1216	C6H5NO2	2-Picolinic acid	Organic acids	Organic acids	98-98-6	B	133420	97584	105370	169110	154960	260340	1.5342	1.73738	0.796915	insig
Lmbp000668	C6H5NO2	Isonicotinic acid	Organic acids	Organic acids	55-22-1	B	255930	199070	205490	293000	266880	550830	1.3067	1.68165	0.749874	insig
Lmbn000612	C5H7NO3	1-Pyrroline-4-hydroxy-2-carboxylic acid	Organic acids	Organic acids	9054-77-7	B	3317.1	3017.1	2848.3	6615.4	4188.7	1366.8	0.184767	1.32545	0.406477	insig
mws0425	C5H6O4	Citraconic acid	Organic acids	Organic acids	498-23-7	B	34094	49671	41095	34833	35013	40879	0.760482	0.886793	-0.17333	insig
Zmpn000638	C4H9N3O2	3-Guanidinopropionic acid	Organic acids	Organic acids	353-09-3	B	28412	24704	21310	25258	29530	28043	1.00429	1.11293	0.154364	insig
pme0274	C6H13NO2	6-Aminocaproic acid	Organic acids	Organic acids	60-32-2	B	634340	553880	541060	796780	687860	456410	0.477252	1.12246	0.166666	insig
pme3034	C5H8O4	Ethylmalonic acid	Organic acids	Organic acids	601-75-2	B	9777.9	15079	9252.6	9496	13787	12086	0.325983	1.03693	0.0523118	insig
pme0243	C5H8O4	Glutaric acid	Organic acids	Organic acids	110-94-1	B	296590	433440	199740	298340	374230	246360	0.165555	0.988341	-0.0169189	insig
Lmmn000806	C5H8O4	Dimethylmalonic acid*	Organic acids	Organic acids	595-46-0	A	95192	141900	49203	69350	110410	16411	0.691156	0.685206	-0.545391	insig
Lmbn001364	C5H8O4	4-Hydroxy-2-Oxopentanoic Acid*	Organic acids	Organic acids	3318-73-8	B	76675	141610	50675	62776	102740	18490	0.695509	0.684139	-0.547639	insig
Lmbn001288	C5H8O4	2-Hydroxy-2-methyl-3-oxobutanoic acid*	Organic acids	Organic acids	71698-08-3	B	84465	138900	45463	69738	97812	18544	0.647725	0.692242	-0.530652	insig
mws0473	C5H8O4	2-Methylsuccinic acid*	Organic acids	Organic acids	498-21-5	A	1051200	1691400	564740	806890	1251000	225130	0.662963	0.690289	-0.534728	insig
Lmgn000160	C4H8N2O3	3-Ureidopropionic Acid	Organic acids	Organic acids	462-88-4	B	19955	12708	12065	19577	24965	13674	0.929244	1.30156	0.380237	insig
Lmrn002746	C6H12O3	2-Hydroxy-4-methylpentanoic acid	Organic acids	Organic acids	498-36-2	A	2745.9	44047	33129	46798	28340	47394	0.855856	1.53315	0.616496	insig
mws0341	C6H12O3	2-Hydroxyisocaproic acid	Organic acids	Organic acids	20312-37-2	A	23207	18524	16644	16932	62307	12784	0.437048	1.57641	0.656644	insig
mws0972	C6H12O3	6-Hydroxyhexanoic acid	Organic acids	Organic acids	1191-25-9	A	581400	863240	684130	439130	602040	297130	1.3321	0.628673	-0.669619	insig
mws0275	C4H6O5	L-Malic acid*	Organic acids	Organic acids	97-67-6	A	37641000	30608000	24952000	32267000	35125000	46574000	1.02157	1.2228	0.290186	insig
Lmbn000198	C4H6O5	3-Dehydro-L-Threonic Acid*	Organic acids	Organic acids	-	A	11661000	9213400	7908500	10249000	10635000	14034000	1.04588	1.21315	0.278759	insig
Lmbn002862	C7H6O3	3-Hydroxybenzoic Acid	Organic acids	Organic acids	99-06-9	B	6381300	1856500	1588200	1657000	2241800	1761400	0.670851	0.576043	-0.795751	insig
pme3207	C6H6O4	Muconic acid	Organic acids	Organic acids	1119-72-8	A	2254500	2351000	2631400	2117200	2168200	3469500	0.227431	1.07158	0.0997363	insig
pme0295	C6H11NO3	4-Acetamidobutyric acid	Organic acids	Organic acids	3025-96-5	B	57198	17634	24993	26552	12188	32969	0.600265	0.718347	-0.477247	insig
mws0567	C5H11N3O2	4-Guanidinobutyric acid	Organic acids	Organic acids	463-00-3	B	166230	138040	141950	148000	114680	102260	1.2415	0.817848	-0.290096	insig
pme2380	C5H6O5	α-Ketoglutaric acid	Organic acids	Organic acids	328-50-7	B	182130	173710	176130	171420	167530	174780	1.31413	0.965712	-0.0503346	insig
mws0208	C6H10O4	Adipic Acid*	Organic acids	Organic acids	124-04-9	B	340330	483310	293610	370050	437150	225650	0.291474	0.924457	-0.113321	insig
Wmzn000227	C6H10O4	2,2-Dimethylsuccinic acid	Organic acids	Organic acids	597-43-3	A	81279	65450	52155	110380	124800	35099	0.424433	1.35898	0.442522	insig
Lmbn001609	C6H10O4	2-Acetyl-2-Hydroxybutanoic Acid	Organic acids	Organic acids	-	B	42348	65098	37757	59371	61833	33491	0.254152	1.06537	0.0913553	insig
mws0924	C6H10O4	2-Methylglutaric acid*	Organic acids	Organic acids	617-62-9	B	281600	379960	260200	353640	444390	220110	0.338104	1.10456	0.143473	insig
Lmbn001676	C6H10O4	3-Hydroxy-3-Methyl-2-Oxopentanoic Acid	Organic acids	Organic acids	-	B	5338.1	12289	2270.8	5296.5	12467	2836.7	0.188839	1.0353	0.0500422	insig
pmb2826	C5H8O5	L-Citramalic acid	Organic acids	Organic acids	6236-09-5	A	573450	483400	341040	352060	499920	457670	0.2029	0.936876	-0.0940695	insig
Lmbn000216	C5H8O5	3-Methylmalic acid	Organic acids	Organic acids	152204-30-3	A	20620	9783.4	28502	10830	12140	20720	0.651932	0.741698	-0.431097	insig
pme3154	C6H12O4	Mevalonic acid	Organic acids	Organic acids	150-97-0	B	386770	964220	1011800	410840	528230	375880	1.14754	0.556524	-0.845483	insig
mws0262	C4H6O6	L-Tartaric acid	Organic acids	Organic acids	87-69-4	B	882680	781310	725920	591850	615530	830700	1.06288	0.852785	-0.229746	insig
mws0596	C7H7NO3	3-Hydroxyanthranilic acid	Organic acids	Organic acids	548-93-6	B	20844	31777	29716	39607	24672	54170	0.978103	1.43859	0.524653	insig
mws0639	C7H6O4	2,3-Dihydroxybenzoic Acid*	Organic acids	Organic acids	303-38-8	A	538690	440230	364740	597970	530120	328990	0.288039	1.08441	0.116912	insig
Lmbn001467	C7H13NO3	5-Acetamidopentanoic Acid	Organic acids	Organic acids	1072-10-2	B	78977	63749	54362	64434	68244	46779	0.507496	0.910542	-0.135202	insig
Zmjn001813	C7H12O4	Pimelic acid*	Organic acids	Organic acids	111-16-0	B	132640	48714	49176	74203	52969	146100	0.390633	1.18541	0.245383	insig
Lmbn002072	C7H12O4	2-Propylsuccinic acid*	Organic acids	Organic acids	618-57-5	B	114900	25966	35829	65073	32484	106470	0.369537	1.15468	0.207499	insig
pme2761	C5H6O6	4-Hydroxy-2-oxoglutaric acid	Organic acids	Organic acids	1187-99-1	B	63209	42855	26097	32204	53491	39948	0.0320724	0.950681	-0.0729662	insig
mws0159	C9H8O3	Phenylpyruvic acid	Organic acids	Organic acids	156-06-9	B	81805	101420	122340	118230	160700	136140	1.37622	1.35837	0.441875	insig
pme0282	C8H6O4	Phthalic acid	Organic acids	Organic acids	88-99-3	A	68547	98641	65126	69464	80714	49210	0.637983	0.858269	-0.220498	insig
mws0344	C5H10O6	D-Xylonic acid	Organic acids	Organic acids	526-91-0	A	2331800	1545400	997410	1212000	2501800	944840	0.13039	0.955695	-0.0653779	insig
mws2125	C3H5O6P	Phosphoenolpyruvate	Organic acids	Organic acids	138-08-9	B	74319	116090	162390	396070	129600	835570	1.28062	3.8584	1.948	up
pme3186	C3H7O6P	DL-Glyceraldehyde-3-phosphate	Organic acids	Organic acids	591-59-3	B	43789	94602	67801	49927	37988	80904	0.57081	0.818747	-0.288511	insig
Lmbn003524	C9H16O3	9-Oxononanoic acid	Organic acids	Organic acids	2553-17-5	B	9649	8856.2	9466.5	9501.6	14774	9500.5	0.94947	1.20751	0.272035	insig
pme3009	C6H6O6	Trans-Citridic acid	Organic acids	Organic acids	4023-65-8	B	459220	535610	381630	427390	495070	509500	0.459098	1.04032	0.0570285	insig
Lmgn002555	C8H14O4	2-Propylglutaric acid	Organic acids	Organic acids	32806-62-5	A	25129	272980	143680	199800	51609	150540	0.164471	0.909821	-0.136345	insig
mws0242	C8H14O4	Suberic Acid	Organic acids	Organic acids	505-48-6	B	43590	49129	36312	44867	34302	31638	0.910531	0.858763	-0.219669	insig
pmb3101	C7H12O5	2-Isopropylmalic Acid	Organic acids	Organic acids	49601-06-1	A	1306800	960850	786580	985960	1529900	551220	0.125014	1.00421	0.00605709	insig
Zmgn001448	C7H12O5	2-Propylmalic Acid*	Organic acids	Organic acids	-	A	1492300	1100900	874200	1116300	1757400	662030	0.0567121	1.01971	0.0281538	insig
Lmbn001754	C7H12O5	3-Isopropylmalic Acid*	Organic acids	Organic acids	921-28-8	A	1431000	1027400	891890	1117500	1633100	659820	0.0553111	1.01795	0.0256634	insig
mws0237	C9H16O4	Azelaic acid	Organic acids	Organic acids	123-99-9	A	1056400	861630	956470	986090	993570	862200	0.15002	0.988645	-0.0164755	insig
Zmyn000453	C6H8O7	Isocitric Acid	Organic acids	Organic acids	320-77-4	A	6662600	7449100	6628900	6209700	6929400	8144900	0.265019	1.0262	0.0373117	insig
mws0281	C6H8O7	Citric Acid	Organic acids	Organic acids	77-92-9	A	5663900	5703300	4299100	3658900	4324600	5397800	0.868047	0.854146	-0.227446	insig
mws0277	C7H12O6	Quinic Acid	Organic acids	Organic acids	77-95-2	A	2090300	2365300	1952700	1846600	1920700	2384200	0.376763	0.959927	-0.0590034	insig
mws1189	C6H10O7	D-Galacturonic acid*	Organic acids	Organic acids	685-73-4	B	17387	16874	7560.4	26641	66548	44770	1.631	3.29877	1.72193	up
Zmtn001464	C10H7NO4	4,8-Dihydroxyquinoline-2-carboxylic acid	Organic acids	Organic acids	59-00-7	B	27644	12213	11616	26573	16347	9467.9	0.0270331	1.01777	0.0254178	insig
mws0474	C12H22O4	Dodecanedioic aicd	Organic acids	Organic acids	693-23-2	A	925.78	384.88	618.6	724.38	969.09	990.86	1.06304	1.39138	0.476514	insig
Lmmn003323	C16H32O3	2-Hydroxyhexadecanoic acid	Organic acids	Organic acids	764-67-0	B	140580	154330	141260	105840	115730	136230	1.45927	0.820322	-0.285737	insig
pmb2657	C10H18N4O6	Argininosuccinic acid	Organic acids	Organic acids	2387-71-5	B	121420	100310	70763	101390	103530	120460	0.713624	1.11244	0.153723	insig
pmb0302	C2H8NO3P	2-Aminoethylphosphonate	Lipids	Glycerol ester	2041-14-7	B	18395	10949	13272	13254	30403	43905	1.20418	2.05467	1.03891	up
mws0752	C11H22O2	Undecylic Acid	Lipids	Free fatty acids	112-37-8	A	421890	453470	469650	403330	558670	474400	0.565645	1.06795	0.0948407	insig
pmb2640	C12H24O2	Dodecanoic acid (Lauric acid)	Lipids	Free fatty acids	143-07-7	A	81650	129670	77990	83263	84452	124090	0.131159	1.00862	0.0123884	insig
Zmgn003633	C12H20O3	12-Oxo-10E-Dodecenoic Acid	Lipids	Free fatty acids	65410-38-0	B	896.45	2209.9	2165.5	2032.7	3131.9	3463.3	1.19383	1.6366	0.7107	insig
mws5045	C12H24O3	12-Hydroxydodecanoic acid	Lipids	Free fatty acids	505-95-3	A	5147.3	6544.7	6778	36291	18529	44739	1.7682	5.39031	2.43037	up
pmb2643	C14H26O2	Myristoleic acid	Lipids	Free fatty acids	544-64-9	A	1113.5	5536.6	1080	2691.5	2083.3	2883	0.544104	0.990647	-0.0135571	insig
mws0119	C14H28O2	Myristic Acid	Lipids	Free fatty acids	544-63-8	A	9636900	10791000	8759900	7827100	8077500	10213000	0.878475	0.894812	-0.160343	insig
pme2827	C16H32O	Palmitaldehyde	Lipids	Free fatty acids	629-80-1	B	4744100	4912300	4898300	4944300	4873300	5004800	1.04143	1.01839	0.026294	insig
mws0359	C15H30O2	Pentadecanoic Acid	Lipids	Free fatty acids	1002-84-2	A	117260	130080	91227	91605	84213	137660	0.418996	0.925896	-0.111077	insig
Hmbp003234	C12H14O6	1-O-Caffeoylglycerol	Lipids	Glycerol ester	-	B	131790	64276	53973	54956	42139	67931	0.949127	0.660001	-0.59946	insig
mws0361	C16H30O2	Palmitoleic Acid	Lipids	Free fatty acids	373-49-9	A	4255.8	3472.3	2229.2	3703.1	2248.2	3420.3	0.177662	0.941179	-0.0874592	insig
mws1488	C16H32O2	Palmitic acid	Lipids	Free fatty acids	57-10-3	A	16896	14755	15853	12477	11750	13030	1.76495	0.784292	-0.350537	insig
mws0120	C8H20NO6P	Choline Alfoscerate	Lipids	PC	28319-77-9	B	34629	46841	20055	46582	68423	25115	0.749429	1.38015	0.464828	insig
mws0383	C17H32O2	10-Heptadecenoic Acid	Lipids	Free fatty acids	29743-97-3	A	388770	386480	137730	230870	113540	288150	0.643823	0.692852	-0.529381	insig
pmp001264	C16H35NO2	Hexadecylsphingosine	Lipids	Sphingolipids	-	A	1934500	2267000	2369600	2599400	2342100	2443900	1.21165	1.12392	0.168541	insig
pmb1574	C18H28O2	9,12-Octadecadien-6-Ynoic Acid	Lipids	Free fatty acids	61481-29-6	B	13139	29629	21193	22011	22653	26956	0.622686	1.11974	0.16317	insig
Lmbn005923	C18H30O2	Crepenynic acid	Lipids	Free fatty acids	2277-31-8	A	266000	205760	230860	211670	154990	163830	1.46985	0.755017	-0.405419	insig
pmb0889	C18H30O2	Punicic acid (9Z,11E,13Z-octadecatrienoic acid)	Lipids	Free fatty acids	544-72-9	B	164510	206730	189920	268200	214040	371440	1.41134	1.52128	0.605283	insig
mws0367	C18H30O2	α-Linolenic Acid*	Lipids	Free fatty acids	463-40-1	A	16790000	13447000	15140000	12367000	9510000	9177700	1.64718	0.684371	-0.54715	insig
mws0366	C18H30O2	γ-Linolenic Acid*	Lipids	Free fatty acids	506-26-3	A	17913000	14204000	15197000	13738000	10072000	10290000	1.54886	0.720717	-0.472495	insig
mws1491	C18H32O2	Linoleic acid	Lipids	Free fatty acids	60-33-3	A	37118000	30682000	30904000	27381000	24938000	23690000	1.63698	0.77007	-0.376938	insig
Lmbn006152	C18H32O2	(9Z,11E)-Octadecadienoic acid	Lipids	Free fatty acids	2540-56-9	B	25031	17215	15900	15016	13073	10986	1.42396	0.672015	-0.573434	insig
YC512118	C18H35NO	Oleamide (9-Octadecenamide)	Lipids	Free fatty acids	301-02-0	A	23827	18939	72796	10710	11719	29554	1.11594	0.449828	-1.15256	down
mws2623	C18H34O2	11-Octadecanoic acid(Vaccenic acid)	Lipids	Free fatty acids	506-17-2	A	2041500	1923200	1781400	1504100	1282600	1373200	1.76768	0.723952	-0.466034	insig
Zmyn005026	C18H36O2	16-Methylheptadecanoic acid	Lipids	Free fatty acids	2724-58-5	B	6436600	9920300	8319300	18494000	9158500	7382500	0.785329	1.41979	0.505677	insig
mws1489	C18H36O2	Stearic Acid	Lipids	Free fatty acids	57-11-4	A	15101000	19840000	19267000	28545000	16593000	12939000	0.0521446	1.07137	0.0994612	insig
mws1436	C18H38O2	1,18-Octadecanediol	Lipids	Free fatty acids	3155-43-9	B	9	9	9	9	9	14697	0.835768	545	9.09011	insig
pmn001686	C16H32O4	10,16-Dihydroxypalmitic acid	Lipids	Free fatty acids	3233-90-7	A	50209	66972	49721	54143	51698	63431	0.207564	1.0142	0.0203421	insig
Zmyn004548	C18H28O3	12-Oxo-phytodienoic acid	Lipids	Free fatty acids	85551-10-6	B	2597.5	3199.5	6971.4	4301	1986.4	2679.9	0.785771	0.702304	-0.509832	insig
pmb2792	C18H30O3	13-Hydroxy-6,9,11-octadecatrienoic acid	Lipids	Free fatty acids	74784-20-6	B	27331	25079	15923	32839	20145	21861	0.396987	1.0953	0.131323	insig
pmb2787	C18H30O3	9-Oxo-10E,12Z-octadecadienoic acid	Lipids	Free fatty acids	54232-59-6	A	27538	19164	26342	29362	16286	33869	0.125184	1.08862	0.122498	insig
pmb2786	C18H30O3	9-Hydroxy-10,12,15-octadecatrienoic acid*	Lipids	Free fatty acids	89886-42-0	B	11239	9486.7	13988	7995.5	6650.3	8035.1	1.64935	0.65337	-0.614027	insig
Lmbn005443	C18H30O3	13-KODE; (9Z,11E)-13-Oxooctadeca-9,11-dienoic acid*	Lipids	Free fatty acids	54739-30-9	B	10412	10184	11362	9070.4	5687.4	8807	1.40783	0.737368	-0.439544	insig
Zmpn003368	C18H30O3	13S-Hydroxy-9Z,11E,15Z-octadecatrienoic acid	Lipids	Free fatty acids	87984-82-5	B	167820	164990	121400	427970	263620	680950	1.63839	3.02182	1.59542	up
pmb2799	C18H32O3	12,13-Epoxy-9-Octadecenoic Acid	Lipids	Free fatty acids	6799-85-5	B	33311	30666	31216	28554	26899	25455	1.6892	0.849936	-0.234573	insig
Lmbn005369	C18H32O3	13(S)-HODE;13(S)-Hydroxyoctadeca-9Z,11E-dienoic acid*	Lipids	Free fatty acids	10219-69-9	A	187670	259660	196170	304380	234440	382350	1.34046	1.4315	0.517527	insig
Lmbn005662	C18H32O3	9(10)-EpOME;(9R,10S)-(12Z)-9,10-Epoxyoctadecenoic acid	Lipids	Free fatty acids	16833-56-0	A	74717	78009	82792	79889	72923	74221	0.826645	0.963973	-0.0529353	insig
Rfmb091	C18H32O3	9S-Hydroxy-10E,12Z-octadecadienoic acid*	Lipids	Free fatty acids	15514-85-9	A	185690	257780	193970	301290	233750	369080	1.35512	1.41836	0.504225	insig
Zmyn004714	C18H34O3	Ricinoleic acid	Lipids	Free fatty acids	141-22-0	A	186810	141580	129770	192200	163440	146420	0.639319	1.09582	0.132008	insig
Zmgn005057	C18H34O3	9,10-Epoxyoctadecanoic Acid	Lipids	Free fatty acids	2443-39-2	A	193120	221300	342790	327470	182990	409100	0.463407	1.21441	0.28025	insig
pmf0297	C20H42O	1-Eicosanol	Lipids	Free fatty acids	629-96-9	B	195010	138630	133760	207000	168710	159630	0.833911	1.14536	0.195798	insig
Lmqn008288	C18H36O3	3-Hydroxyoctadecanoic Acid	Lipids	Free fatty acids	45261-96-9	B	507380	424260	417330	479440	467820	522220	0.994162	1.08933	0.123447	insig
pmn001610	C20H36O2	Eicosadienoic acid	Lipids	Free fatty acids	5598-38-9	A	45140	21762	26722	49913	21089	45436	0.470875	1.24368	0.314612	insig
pmb2791	C18H30O4	9-Hydroperoxy-10E,12,15Z-octadecatrienoic acid	Lipids	Free fatty acids	111004-08-1	A	119190	93157	60192	265360	284800	141380	1.60348	2.5374	1.34335	up
pmn001606	C20H38O2	Eicosenoic acid	Lipids	Free fatty acids	26764-41-0	A	766930	923610	1426300	1057900	1288100	1256700	0.746839	1.15588	0.208994	insig
Zmjn004133	C18H32O4	9S-Hydroperoxy-10E,12Z-octadecadienoic acid	Lipids	Free fatty acids	5502-91-0	A	56489	51201	61906	52508	57920	44575	0.853428	0.913954	-0.129806	insig
Lmbn004685	C18H32O4	5S,8R-DiHODE; (5S,8R,9Z,12Z)-5,8-Dihydroxyoctadeca-9,12-dienoate	Lipids	Free fatty acids	-	A	8562.6	6687.7	5801.9	18349	16791	13233	1.77919	2.29776	1.20023	up
Lmbn005287	C18H32O4	7S,8S-DiHODE; (9Z,12Z)-(7S,8S)-Dihydroxyoctadeca-9,12-dienoic acid	Lipids	Free fatty acids	143288-65-7	A	99620	146160	84855	77713	118280	83771	0.590031	0.846142	-0.241029	insig
pmn001689	C18H32O4	9-Hydroxy-12-oxo-15(Z)-octadecenoic acid	Lipids	Free fatty acids	-	B	47043	38499	48006	48834	40018	48902	0.222858	1.03149	0.0447358	insig
pmb2804	C18H32O4	13S-Hydroperoxy-9Z,11E-octadecadienoic acid	Lipids	Free fatty acids	33964-75-9	B	190220	202630	232720	220630	193430	230800	0.298747	1.03084	0.0438147	insig
pmf0397	C20H40O2	Arachidic acid	Lipids	Free fatty acids	506-30-9	B	1691500	1483700	2784100	2861200	1673000	3181200	0.729231	1.29468	0.372598	insig
Lmbn005487	C18H34O4	12,13-DHOME; (9Z)-12,13-Dihydroxyoctadec-9-enoic acid	Lipids	Free fatty acids	263399-35-5	B	23206	26529	17670	20739	22215	22903	0.000725015	0.977034	-0.0335188	insig
pmb2221	C18H39NO3	4-Hydroxysphinganine	Lipids	Sphingolipids	554-62-1	A	90491	126990	80313	116620	142150	76670	0.488759	1.12642	0.17174	insig
Hmqn003054	C18H34O5	9,10,11-Trihydroxy-12-octadecenoic acid	Lipids	Free fatty acids	61911-67-9	A	22831	34361	35242	52006	40538	50171	1.51428	1.54397	0.626641	insig
pmn001694	C18H34O5	9,10,13-Trihydroxy-11-Octadecenoic Acid	Lipids	Free fatty acids	29907-57-1	A	353600	514090	533680	790070	563190	717090	1.42432	1.47738	0.563037	insig
Lmbn004240	C18H34O5	9,10-Dihydroxy-12,13-epoxyoctadecanoic acid	Lipids	Free fatty acids	-	B	20164	22014	19727	21989	20117	23173	0.848051	1.0545	0.076563	insig
Lmbn003970	C18H34O5	9,12,13-TriHOME; 9(S),12(S),13(S)-Trihydroxy-10(E)-octadecenoic acid	Lipids	Free fatty acids	97134-11-7	A	37023	49249	36418	85452	86039	92280	1.83906	2.1499	1.10427	up
pmp001284	C19H38O4	Monopalmitin	Lipids	Glycerol ester	542-44-9	A	6588.7	5356.2	6152.2	8182.7	5673.3	5212.1	0.174186	1.05366	0.0754026	insig
pmb1562	C21H34O4	1-Stearidonoyl-Glycerol	Lipids	Glycerol ester	-	B	7114.1	2803.9	4021.2	4144.5	6451.6	5423.2	0.583966	1.14923	0.200663	insig
Lmhp011562	C21H36O4	1-α-Linolenoyl-glycerol	Lipids	Glycerol ester	-	A	2416100	2298400	2420100	2286900	940710	1219100	1.38725	0.62326	-0.682094	insig
Lmhp011388	C21H36O4	2-α-Linolenoyl-glycerol	Lipids	Glycerol ester	55268-58-1	A	705430	958390	852200	978920	392400	501210	1.04008	0.744243	-0.426155	insig
Lmhp012042	C21H38O4	2-Linoleoylglycerol	Lipids	Glycerol ester	3443-82-1	A	301470	294710	209640	204840	129370	121300	1.54555	0.565275	-0.822975	insig
Lmhp112042	C21H38O4	1-Linoleoylglycerol	Lipids	Glycerol ester	2277-28-3	A	304130	285780	224120	212270	134650	135910	1.57662	0.593135	-0.753567	insig
pmb0296	C21H40O4	1-Oleoyl-Sn-Glycerol	Lipids	Glycerol ester	129784-87-8	A	353840	297520	334700	188030	164630	95801	1.6812	0.454801	-1.13669	down
pmd0152	C19H39O7P	LysoPA 16:0 (2n isomer)	Lipids	Glycerol ester	-	B	9	5328.6	8498.1	9	9	9	1.33426	0.00195147	-9.00122	down
pmd0153	C19H39O7P	LysoPA 16:0	Lipids	Glycerol ester	22002-85-3	B	9	10699	9363	10555	5548.9	9082.8	0.775108	1.25488	0.32755	insig
Lmhp008337	C19H40NO7P	LysoPE 14:0(2n isomer)	Lipids	LPE	-	B	13991	7032.8	11636	9543.7	2923.6	3144.1	1.36558	0.478	-1.06492	down
pmb0864	C19H40NO7P	LysoPE 14:0	Lipids	LPE	-	B	52061	32793	38607	40734	13343	10102	1.309	0.519832	-0.943882	insig
Lmhp008440	C20H40NO7P	LysoPE 15:1	Lipids	LPE	-	A	9	9	9	1910.6	9	9	0.807724	71.4296	6.15845	insig
Lmhp008273	C20H40NO7P	LysoPE 15:1(2n isomer)	Lipids	LPE	-	B	365.38	429.11	586.32	9	9	9	1.88285	0.0195537	-5.67641	down
Lmhp009187	C20H42NO7P	LysoPE 15:0	Lipids	LPE	-	A	30841	19192	22352	19567	11683	8179.7	1.43041	0.544722	-0.876408	insig
Lmhp008885	C20H42NO7P	LysoPE 15:0(2n isomer)	Lipids	LPE	-	A	6943.2	4935.5	7531.4	5008	2172	1664.7	1.50199	0.455675	-1.13392	down
Lmhp007836	C21H38NO7P	LysoPE 16:3	Lipids	LPE	-	A	30246	18767	21024	33180	14830	7627.5	0.766664	0.794402	-0.33206	insig
Lmhp008763	C21H42NO7P	LysoPE 16:1(2n isomer)	Lipids	LPE	-	A	26028	17459	16262	39547	50227	10785	0.646267	1.68302	0.751056	insig
Lmhp009034	C21H42NO7P	LysoPE 16:1	Lipids	LPE	-	A	90248	44510	62989	91117	73391	24138	0.319156	0.953977	-0.0679743	insig
pmd0160	C21H44NO7P	LysoPE 16:0(2n isomer)	Lipids	LPE	-	A	1183100	716340	1014800	924940	288270	297060	1.34881	0.518238	-0.948313	insig
pmb0876	C21H44NO7P	LysoPE 16:0	Lipids	LPE	53862-35-4	A	4087900	2966800	4007200	3833400	1268900	1263400	1.29966	0.575462	-0.797208	insig
Lmhp009464	C22H44NO7P	LysoPE 17:1(2n isomer)	Lipids	LPE	-	A	12037	7139.4	13432	11667	5341.7	4331.8	1.10694	0.654448	-0.61165	insig
Lmhp009769	C22H44NO7P	LysoPE 17:1	Lipids	LPE	-	A	13564	9323.7	9538.3	13811	5006.4	4678.9	0.991247	0.724613	-0.464717	insig
pmd0130	C22H46NO7P	LysoPC 14:0	Lipids	LPC	20559-16-4	A	26570	22111	23150	29488	16562	8081.2	0.916903	0.753591	-0.408146	insig
Lmhp008233	C23H40NO7P	LysoPE 18:4	Lipids	LPE	-	A	2165	1968.9	1065.3	2976.4	1240.7	966.08	0.179458	0.996919	-0.00445216	insig
Lmhp008589	C23H42NO7P	LysoPE 18:3(2n isomer)	Lipids	LPE	-	A	2149500	2227600	1583400	3428900	2714900	1005700	0.185853	1.19948	0.262409	insig
Lmhp008801	C23H42NO7P	LysoPE 18:3	Lipids	LPE	-	A	1969600	1459600	1497700	2318500	1232300	683050	0.657958	0.859333	-0.21871	insig
pmb0874	C23H44NO7P	LysoPE 18:2(2n isomer)	Lipids	LPE	-	A	9423600	8147300	6237100	12314000	9429700	3150100	0.182244	1.04561	0.06434	insig
pmb0881	C23H44NO7P	LysoPE 18:2	Lipids	LPE	-	A	5363600	3760400	3928800	5814700	3138800	1545200	0.763222	0.804326	-0.314149	insig
pmb2260	C23H46NO7P	LysoPC 15:1	Lipids	LPC	-	A	3394.7	4895.8	5289.1	4422.7	3193.8	2149.6	1.10698	0.719174	-0.475587	insig
mws0289	C23H46NO7P	LysoPE 18:1	Lipids	LPE	89576-29-4	A	1285400	951080	1368600	1343700	645730	644750	1.11111	0.730686	-0.452677	insig
pmb0856	C23H46NO7P	LysoPE 18:1(2n isomer)	Lipids	LPE	-	A	1106000	1105600	1221700	1620600	1027200	776810	0.24135	0.997469	-0.00365622	insig
pmb0883	C23H48NO7P	LysoPE 18:0	Lipids	LPE	69747-55-3	A	19017	14395	21194	18207	8694.3	7038.2	1.29149	0.621534	-0.686094	insig
pmb2319	C23H48NO7P	LysoPC 15:0	Lipids	LPC	108273-89-8	A	68795	49410	58745	46934	43338	29143	1.43694	0.674852	-0.567358	insig
pmb0880	C23H48NO7P	LysoPE 18:0(2n isomer)	Lipids	LPE	-	A	16283	13827	17208	16506	8009.1	7614.3	1.27692	0.67901	-0.558495	insig
Lmhp009129	C23H48NO7P	LysoPC 15:0(2n isomer)	Lipids	LPC	-	A	18417	10627	11493	10104	14396	7796.6	0.773449	0.796719	-0.327857	insig
Hmyn007168	C22H45O9P	LysoPG 16:0	Lipids	Glycerol ester	-	B	2799600	3210600	2326100	3268800	3008700	1779500	0.227544	0.966496	-0.0491644	insig
pma1303	C24H46NO7P	LysoPC 16:2	Lipids	LPC	-	A	84746	60417	68462	83328	36913	35554	1.07329	0.729292	-0.455432	insig
pmb0863	C24H46NO7P	LysoPC 16:2(2n isomer)	Lipids	LPC	-	A	27864	26357	22100	35483	26309	11034	0.385324	0.954207	-0.0676265	insig
pmp001270	C24H48NO7P	LysoPC 16:1	Lipids	LPC	76790-27-7	A	274730	185530	195680	227860	252030	116410	0.441219	0.909077	-0.137526	insig
Lmhp008833	C24H48NO7P	LysoPC 16:1(2n isomer)	Lipids	LPC	-	A	167640	156660	120370	223980	295020	73285	0.330862	1.33197	0.413556	insig
pmb0855	C24H50NO7P	LysoPC 16:0	Lipids	LPC	17364-16-8	A	12009000	11142000	13401000	10954000	7244000	6721400	1.5088	0.681752	-0.552681	insig
pmd0132	C24H50NO7P	LysoPC 16:0(2n isomer)	Lipids	LPC	-	A	2248900	1956300	2481500	2004700	1185400	1080600	1.47432	0.638686	-0.646822	insig
Lmhp010040	C25H46NO7P	LysoPE 20:3	Lipids	LPE	-	A	10110	6415.3	7044.1	9047.9	3430.3	2673.9	1.12586	0.642872	-0.637397	insig
Lmhp009802	C25H46NO7P	LysoPE 20:3(2n isomer)	Lipids	LPE	-	A	10023	7244	8157.8	10295	4445.9	2541.3	1.05083	0.679738	-0.55695	insig
Lmhp010514	C25H48NO7P	LysoPE 20:2(2n isomer)	Lipids	LPE	-	A	6686.2	5039.3	5517.5	10075	3555.5	2382.5	0.567134	0.928667	-0.106767	insig
Lmhp008718	C25H48NO7P	LysoPC 17:2	Lipids	LPC	-	A	18258	15106	12297	22672	21267	6269.3	0.0679051	1.09959	0.136963	insig
Lmhp010757	C25H48NO7P	LysoPE 20:2	Lipids	LPE	-	A	18471	10828	13181	20163	4987.4	5804.2	0.932309	0.728686	-0.45663	insig
Lmhp009590	C25H50NO7P	LysoPC 17:1	Lipids	LPC	-	A	27309	24675	28807	26757	18980	12836	1.23418	0.724994	-0.463959	insig
Lmhp010515	C25H52NO7P	LysoPC 17:0(2n isomer)	Lipids	LPC	-	A	20504	14252	16156	10896	17716	8369.7	1.09454	0.726385	-0.461194	insig
pmb2406	C25H52NO7P	LysoPC 17:0	Lipids	LPC	50930-23-9	A	12618	12069	14737	6263.4	10984	3784.3	1.40682	0.533475	-0.906509	insig
Lmhp009526	C27H46O9	2-α-Linolenoyl-glycerol-1-O-glucoside	Lipids	Glycerol ester	-	A	86933	96026	121070	63471	91147	33114	1.24564	0.617481	-0.695534	insig
Lmhp009773	C27H46O9	1-α-Linolenoyl-glycerol-3-O-glucoside	Lipids	Glycerol ester	-	A	153020	137360	199750	157590	58032	57857	1.36264	0.557972	-0.841734	insig
Hmqp006235	C26H46NO7P	LysoPC 18:4	Lipids	LPC	-	A	8564.7	10964	6322.4	9439.5	12634	4238.6	0.0883721	1.01783	0.0255007	insig
Lmhp010334	C27H48O9	2-Linoleoylglycerol-1-O-glucoside	Lipids	Glycerol ester	-	A	2769.2	4591.8	2642.2	1761.6	1955.3	1087.6	1.51674	0.480296	-1.058	down
Lmhp010573	C27H48O9	1-Linoleoylglycerol-3-O-glucoside	Lipids	Glycerol ester	-	A	4046.3	4262	6658.2	3363.3	418.57	1526.2	1.41216	0.354663	-1.49548	down
pmb0865	C26H48NO7P	LysoPC 18:3(2n isomer)	Lipids	LPC	-	A	10911000	8697800	9229100	10622000	8292000	5050500	0.846286	0.831007	-0.267067	insig
pmb0854	C26H48NO7P	LysoPC 18:3	Lipids	LPC	-	A	10481000	8289500	9548400	10527000	8125500	5197500	0.835523	0.842194	-0.247776	insig
pmp001251	C26H50NO7P	LysoPC 18:2(2n isomer)	Lipids	LPC	-	A	1091200	977610	820480	1354900	1158600	392980	0.262083	1.00595	0.00855797	insig
pmp001273	C26H50NO7P	LysoPC 18:2	Lipids	LPC	-	A	803270	612490	685610	751490	542450	328270	0.99704	0.771977	-0.37337	insig
Lmhp010190	C26H52NO7P	LysoPC 18:1(2n isomer)	Lipids	LPC	-	A	14806000	16220000	16880000	24186000	15600000	8544200	0.251115	1.00885	0.0127186	insig
pmp001281	C26H52NO7P	LysoPC 18:1	Lipids	LPC	-	A	9509800	7724300	10084000	10902000	5918500	4901000	0.962551	0.795132	-0.330733	insig
mws0126	C26H54NO7P	LysoPC 18:0	Lipids	LPC	19420-57-6	A	241950	212180	246150	211780	159070	150460	1.53486	0.744431	-0.42579	insig
pmd0136	C26H54NO7P	LysoPC 18:0(2n isomer)	Lipids	LPC	-	A	62064	38546	51026	47990	23168	29851	1.27147	0.666128	-0.586128	insig
Lmhp007840	C27H52NO7P	LysoPC 19:2	Lipids	LPC	-	A	6357.8	5475.2	5163.9	9621.4	5294	2733.3	0.229236	1.03835	0.0542903	insig
Lmhp007598	C27H52NO7P	LysoPC 19:2(2n isomer)	Lipids	LPC	-	A	10291	7592.3	6169.2	4825.7	8797.4	6472.4	0.662368	0.835485	-0.259314	insig
Lmhp010908	C27H54NO7P	LysoPC 19:1	Lipids	LPC	-	A	7380.1	9475.5	8397.6	11129	8141.8	6167.7	0.0881861	1.00734	0.0105474	insig
pmb2228	C27H56NO7P	LysoPC 19:0	Lipids	LPC	108273-88-7	A	8222.1	3645.6	1736	4998.7	5552.8	3309.7	0.40585	1.01893	0.0270531	insig
Lmhp009890	C28H52NO7P	LysoPC 20:3	Lipids	LPC	1199257-41-4	A	39797	31885	32795	51295	22669	27804	0.352096	0.974071	-0.0379014	insig
pmd0147	C28H54NO7P	LysoPC 20:2	Lipids	LPC	-	A	83370	65773	69509	129320	53511	79046	0.367006	1.19769	0.260253	insig
pmd0146	C28H54NO7P	LysoPC 20:2(2n isomer)	Lipids	LPC	-	A	28184	22489	21402	68548	20125	25928	0.695042	1.59002	0.669049	insig
Lmhp011549	C28H56NO7P	LysoPC 20:1	Lipids	LPC	-	A	11915	16675	23254	20589	11996	13869	0.422755	0.896034	-0.158374	insig
Lmhp008744	C33H56O14	1-α-Linolenoyl-glycerol-2,3-di-O-glucoside	Lipids	Glycerol ester	-	A	298910	91348	177020	101920	51284	33764	1.46393	0.329588	-1.60126	down
Lmhp008513	C33H56O14	2-α-Linolenoyl-glycerol-1,3-di-O-glucoside	Lipids	Glycerol ester	-	A	264380	229610	295870	102080	103070	69515	1.82243	0.347739	-1.52392	down
Lmhp009190	C33H58O14	2-Linoleoylglycerol-1,3-di-O-glucoside	Lipids	Glycerol ester	-	A	11976	10981	8864.4	7093.5	7255.4	2047.1	1.27456	0.515251	-0.956653	insig
Lmhp009384	C33H58O14	1-Linoleoylglycerol-2,3-di-O-glucoside	Lipids	Glycerol ester	-	A	7876.2	12061	9144.6	6151.5	2865.7	3212	1.63073	0.42051	-1.24979	down
