# Supplementary material for: Elucidating the Differentiation Synthesis Mechanisms of Differently Colored Resistance Quinoa Seedings Using Metabolite Profiling and Transcriptome Analysis
Source: Metabolites. 2023 Oct 10;13(10):1065. doi: 10.3390/metabo13101065 (PMC10609267; doi:10.3390/metabo13101065)
Supplement: Supplementary file 1 [file metabolites-13-01065-s001.zip › Table S8.xlsx]

## Sheet: Sheet1
Table S8 Significantly different metabolites in R-RvsR-W
Index	Formula	Compounds	Class I	Class II	CAS	Level	R-R1	R-R2	R-R3	R-R average	R-W1	R-W2	R-W3	R-W average	VIP	Fold_Change	Log2FC	Type
Lmbp000123	C6H13NO2S	L-Homomethionine	Amino acids and derivatives	Amino acids and derivatives	25148-30-5	B	681820	312540	621920	538760	87365	155730	295490	179528	1.29392	0.333225	-1.58543	down
Zmyn002919	C8H8O2	2-Methylbenzoic acid	Phenolic acids	Phenolic acids	118-90-1	B	9002.9	11604	14551	11719.3	4702.1	4758.7	3420.3	4293.7	1.51063	0.366379	-1.44859	down
Lmxp001668	C9H10O2	2-Methoxy-4-ethenylphenol	Phenolic acids	Phenolic acids	7786-61-0	A	1589600	1772200	1402700	1.58817e+06	145100	109600	25633	93444.3	1.51385	0.0588379	-4.08711	down
pme2362	C8H8O3	Mandelic acid	Phenolic acids	Phenolic acids	90-64-2	B	72062	95616	68364	78680.7	44417	33312	28606	35445	1.48678	0.450492	-1.15043	down
mws0458	C8H8O3	Vanillin	Phenolic acids	Phenolic acids	121-33-5	B	316460	239060	288770	281430	16679	44362	45089	35376.7	1.52823	0.125703	-2.99191	down
mws0183	C7H6O4	3,4-Dihydroxybenzoic acid (Protocatechuic acid)*	Phenolic acids	Phenolic acids	99-50-3	A	87331	109190	96513	97678	21305	28042	15342	21563	1.55646	0.220756	-2.17948	down
mws0180	C7H6O4	2,5-Dihydroxybenzoic acid; Gentisic Acid*	Phenolic acids	Phenolic acids	490-79-9	A	56864	88284	35424	60190.7	25741	30532	13132	23135	1.26229	0.384362	-1.37946	down
pme3381	C9H10O3	3-Hydroxyphenylacetic Acid Methyl Ester	Phenolic acids	Phenolic acids	42058-59-3	B	10563	15952	19285	15266.7	1132	1289.4	2851.5	1757.63	1.53543	0.115129	-3.11868	down
Hmbp001276	C8H8O4	Gallacetophenone	Phenolic acids	Phenolic acids	528-21-2	B	202770	258090	258760	239873	125800	132080	97885	118588	1.51141	0.494379	-1.01631	down
mws2212	C9H8O4	Caffeic acid	Phenolic acids	Phenolic acids	331-39-5	A	3181200	861590	2263400	2.10206e+06	436900	1329500	819360	861920	1.03141	0.410035	-1.28618	down
Xmgn006542	C10H10O4	Dimethyl Phthalate	Phenolic acids	Phenolic acids	131-11-3	B	80179	107770	101380	96443	51157	15782	19573	28837.3	1.41326	0.299009	-1.74174	down
mws0014	C10H10O4	Ferulic acid	Phenolic acids	Phenolic acids	537-98-4	A	21064000	5506400	12873000	13147800	787950	3046200	2570100	2134750	1.35444	0.162366	-2.62268	down
mws1212	C11H12O4	Methyl ferulate	Phenolic acids	Phenolic acids	2309-07-1	A	8954800	12695000	9944800	1.05315e+07	4570800	1970500	1615200	2.71883e+06	1.46362	0.258161	-1.95366	down
pmb2620	C11H12O4	3,4-Dimethoxycinnamic acid	Phenolic acids	Phenolic acids	14737-89-4	A	4325900	6172900	5048200	5.18233e+06	2135200	1075700	842300	1.35107e+06	1.48514	0.260706	-1.9395	down
pmn001669	C12H14O5	Methyl sinapate	Phenolic acids	Phenolic acids	20733-94-2	A	9285.7	20745	8076.9	12702.5	9778	5232.2	3164.9	6058.37	1.04762	0.476942	-1.06812	down
pmp000086	C13H16O6	1-Feruloyl-sn-glycerol	Phenolic acids	Phenolic acids	-	B	6360400	5439900	6720400	6.17357e+06	2786000	2675100	3069900	2.84367e+06	1.57985	0.46062	-1.11835	down
Zmhn001926	C13H16O8	1-O-Salicyl-D-glucose	Phenolic acids	Phenolic acids	60517-74-0	A	25315000	13157000	16059000	18177000	7395400	11698000	6249200	8.44753e+06	1.3098	0.464737	-1.10551	down
Hmtn001120	C14H20O8	5-(2-Hydroxyethyl)-2-O-glucosylphenol	Phenolic acids	Phenolic acids	-	A	257410	292060	255340	268270	101270	32517	59252	64346.3	1.48507	0.239857	-2.05976	down
Lmtn000940	C14H18O10	1-O-(3,4-Dihydroxy-5-methoxy-benzoyl)-glucoside	Phenolic acids	Phenolic acids	-	B	35947	49272	36500	40573	9277.7	3968.4	6205.9	6484	1.55204	0.159811	-2.64556	down
Hmmn002544	C16H20O9	Ferulic acid-4-O-glucoside	Phenolic acids	Phenolic acids	117405-51-3	A	928760	1189800	1056000	1.05819e+06	268030	239380	393150	300187	1.55619	0.28368	-1.81766	down
Zmhn002334	C16H20O9	6-O-Feruloyl-D-glucose	Phenolic acids	Phenolic acids	137887-25-3	B	4406600	5492900	5283100	5.06087e+06	2723400	1760300	1617800	2.03383e+06	1.50813	0.401875	-1.31518	down
pmb2940	C17H22O10	1-O-Glucosyl sinapate	Phenolic acids	Phenolic acids	78185-48-5	B	849110	1484500	1071800	1.13514e+06	605070	387930	324020	439007	1.42979	0.386743	-1.37055	down
Cmjn004337	C18H26O10	Benzyl-(2''-O-xylosyl)glucoside	Phenolic acids	Phenolic acids	-	B	26861	48696	41411	38989.3	24865	12709	13717	17097	1.34674	0.438505	-1.18934	down
Zmhn002508	C21H28O12	4-p-Cumaroyl-rhamnosyl-(1→6)-D-glucose	Phenolic acids	Phenolic acids	-	B	14034	15857	16776	15555.7	9	9	9	9	1.60646	0.000578567	-10.7552	down
Zmhn004909	C21H18O13	3,4-Digalloylshikimic acid	Phenolic acids	Phenolic acids	-	B	91751	133920	109720	111797	13789	13883	15731	14467.7	1.59486	0.12941	-2.94998	down
Lmnn002886	C23H26O11	1'-O-(3,4-Dihydroxyphenethyl)-O-caffeoyl-glucoside	Phenolic acids	Phenolic acids	-	B	27182000	30744000	26740000	28222000	3654400	3309100	3588700	3517400	1.6051	0.124633	-3.00424	down
pmb0824	C25H28O13	Syringic acid-4-O-(6''-feruloyl)glucoside	Phenolic acids	Phenolic acids	-	B	157590	163950	171920	164487	35030	34288	44227	37848.3	1.59676	0.2301	-2.11967	down
Hmln002149	C29H36O15	Acteoside	Phenolic acids	Phenolic acids	61276-17-3	B	10562	8530.2	6505.6	8532.6	9	9	11479	3832.33	1.10078	0.44914	-1.15476	down
pme0033	C5H4N4O	Hypoxanthine	Nucleotides and derivatives	Nucleotides and derivatives	68-94-0	B	97997	124040	73575	98537.3	33019	10016	6448.1	16494.4	1.43891	0.167392	-2.5787	down
pmp000001	C16H12O6	Hispidulin (5,7,4'-Trihydroxy-6-methoxyflavone)	Flavonoids	Flavonoid	1447-88-7	B	17722	14977	14103	15600.7	7888	7118.1	5742	6916.03	1.54864	0.443317	-1.17359	down
pme2954	C15H10O7	Quercetin	Flavonoids	Flavonols	117-39-5	A	896420	700820	811360	802867	87570	36640	56787	60332.3	1.58224	0.0751461	-3.73416	down
Cmsp004086	C16H14O6	Dihydrokaempferide	Flavonoids	Flavonols	137225-59-3	B	308620	179310	360430	282787	32542	28892	24411	28615	1.57703	0.101189	-3.30487	down
mws0044	C15H12O7	Dihydroquercetin(Taxifolin)	Flavonoids	Dihydroflavonol	480-18-2	B	19018	34956	44948	32974	9	9	9	9	1.60282	0.000272942	-11.8391	down
mws1174	C17H14O6	3-O-Acetylpinobanksin	Flavonoids	Dihydroflavonol	52117-69-8	A	312.58	12459	22017	11596.2	4070.1	9	9	1362.7	1.05	0.117513	-3.08911	down
mws0066	C16H12O7	Isorhamnetin	Flavonoids	Flavonols	480-19-3	A	2503700	1857300	2068800	2.14327e+06	36418	43270	50130	43272.7	1.60366	0.0201901	-5.63021	down
mws2186	C20H18O11	Avicularin(Quercetin-3-O-α-L-arabinofuranoside)	Flavonoids	Flavonols	572-30-5	A	2845600	1712200	1764000	2.10727e+06	6415.3	4114.6	363.97	3631.29	1.55369	0.00172322	-9.18068	down
Lmdp003509	C20H18O11	Quercetin-3-O-xyloside (Reynoutrin)	Flavonoids	Flavonols	549-32-6	B	4106100	683850	2592100	2.46068e+06	8058.6	7802.2	4769.7	6876.83	1.57815	0.00279468	-8.4831	down
Hmcp002316	C21H20O11	Isorhamnetin-3-O-arabinoside	Flavonoids	Flavonols	-	A	8535900	6706200	5327000	6.85637e+06	48149	67177	68961	61429	1.60191	0.00895941	-6.80238	down
mws0045	C21H20O11	Quercetin-3-O-rhamnoside(Quercitrin)	Flavonoids	Flavonols	522-12-3	B	383920	235480	303030	307477	9	9	9	9	1.60663	2.92705e-05	-15.0602	down
mws0913	C21H20O11	Kaempferol-3-O-galactoside (Trifolin)	Flavonoids	Flavonols	23627-87-4	B	120950	93007	77013	96990	13955	30359	21714	22009.3	1.51393	0.226924	-2.13972	down
HJN086	C21H22O11	Eriodictyol-3'-O-glucoside	Flavonoids	Dihydroflavone	-	B	17047	22312	27933	22430.7	9	9	1542.6	520.2	1.4015	0.0231915	-5.43026	down
Hmcp002539	C22H22O11	Isorhamnetin-3-O-rhamnoside	Flavonoids	Flavonols	-	B	2863200	2458000	1866900	2.39603e+06	7624.3	10076	18094	11931.4	1.59804	0.00497966	-7.64974	down
pmp000579	C22H22O11	Diosmetin-7-O-galactoside	Flavonoids	Flavonoid	-	A	496720	496910	487800	493810	228990	218570	231980	226513	1.6061	0.458705	-1.12436	down
mws1329	C21H20O12	Quercetin-7-O-glucoside*	Flavonoids	Flavonols	491-50-9	A	404890	522730	367450	431690	18287	19521	13370	17059.3	1.59799	0.0395176	-4.66136	down
mws0091	C21H20O12	Quercetin-3-O-glucoside (Isoquercitrin)*	Flavonoids	Flavonols	482-35-9	A	787620	909670	647090	781460	47499	24988	31777	34754.7	1.59534	0.044474	-4.49089	down
mws0061	C21H20O12	Quercetin-3-O-galactoside (Hyperin)	Flavonoids	Flavonols	482-36-0	A	914220	1417200	987530	1.10632e+06	67859	45321	56894	56691.3	1.59633	0.0512433	-4.28649	down
Lmdp003286	C21H20O12	Isohyperoside	Flavonoids	Flavonols	35589-21-0	A	6392800	6172000	5505500	6.02343e+06	847470	972240	892050	903920	1.60272	0.150067	-2.73632	down
pme1598	C22H24O11	Hesperetin-5-O-glucoside	Flavonoids	Dihydroflavonol	69651-80-5	B	616920	870620	623480	703673	36217	24931	26674	29274	1.59952	0.0416017	-4.58721	down
Xmsn002700	C21H22O12	Taxifolin-3'-O-glucoside	Flavonoids	Flavonoid	31106-05-5	B	20852	24506	19189	21515.7	9	9	9	9	1.60641	0.0004183	-11.2232	down
Lmfn003760	C21H18O13	Quercetin-4′-O-glucuronide	Flavonoids	Flavonols	201463-36-7	A	3884200	3819400	3277000	3660200	484820	422690	396430	434647	1.6033	0.118749	-3.07401	down
Hmjp003123	C21H18O13	Quercetin-5-O-glucuronide	Flavonoids	Flavonols	-	B	11934000	10114000	9314300	10454100	1245100	863580	890610	999763	1.59888	0.0956336	-3.38634	down
Lmjp003044	C22H22O12	Isorhamnetin-3-O-Glucoside*	Flavonoids	Flavonols	5041-82-7	A	12148000	12687000	10450000	1.17617e+07	433840	408880	423280	422000	1.60604	0.0358793	-4.80071	down
Hmcp002207	C22H22O12	Isorhamnetin-7-O-glucoside (Brassicin)*	Flavonoids	Flavonols	6743-96-0	A	11732000	12408000	9892200	1.13441e+07	458300	380010	403490	413933	1.60543	0.036489	-4.7764	down
Hmln002199	C23H22O13	Quercetin-3-O-(6''-acetyl)galactoside	Flavonoids	Flavonols	-	B	29197	29987	26805	28663	2966.2	1853.9	9	1609.7	1.21929	0.0561595	-4.15433	down
Li512111	C24H24O13	Isorhamnetin-3-O-(6''-acetylglucoside)	Flavonoids	Flavonols	-	B	55913	76793	64429	65711.7	2588.5	9	9	868.833	1.42349	0.0132219	-6.24093	down
Hmln002189	C24H22O15	Quercetin-3-O-(6''-malonyl)galactoside	Flavonoids	Flavonols	-	A	50638	60414	43049	51367	9	9	9	9	1.6063	0.00017521	-12.4786	down
HJAP064	C25H24O15	Isorhamnetin-3-O-(6''-malonylglucoside)	Flavonoids	Flavonoid	-	B	311220	291540	279590	294117	18891	10648	14363	14634	1.60022	0.0497558	-4.32899	down
Lmmp003306	C25H26O15	Quercetin-3-O-xylosyl(1→2)arabinoside	Flavonoids	Flavonols	-	A	1749400	1498700	1232900	1.49367e+06	32109	32363	36613	33695	1.60478	0.0225586	-5.47018	down
Lmnp002741	C27H30O14	Genkwanin-6-C-(2''-O-apiosyl)glucoside	Flavonoids	Flavonoid carbonoside	-	B	146400	175820	122470	148230	9	9	9	9	1.60635	6.07165e-05	-14.0076	down
Hmgp003641	C28H32O14	Chrysoeriol-6-C-rhamnoside-7-O-rhamnoside	Flavonoids	Flavonoid	-	B	36602	83414	70771	63595.7	12988	11137	16137	13420.7	1.50795	0.211031	-2.24447	down
pmp001288	C28H32O14	Acacetin-7-O-rutinoside (Linarin)	Flavonoids	Flavonoid	480-36-4	A	1298300	2763700	2393800	2.15193e+06	442270	364960	454500	420577	1.53495	0.195441	-2.35519	down
mws1290	C30H26O13	Kaempferol-3-O-(6''-p-Coumaroyl)glucoside (Tiliroside)	Flavonoids	Flavonols	20316-62-5	B	45738	60313	58841	54964	9	9	9	9	1.60617	0.000163744	-12.5763	down
Lmjp002596	C26H28O16	Quercetin-3-O-sambubioside	Flavonoids	Flavonols	83048-35-5	A	752730	858200	868650	826527	12071	26853	28696	22540	1.5849	0.0272707	-5.1965	down
Lmtp004044	C26H28O16	Quercetin-3-O-apiosyl(1→2)galactoside	Flavonoids	Flavonols	-	B	22354000	18981000	21271000	2.08687e+07	486360	520990	577600	528317	1.60589	0.0253163	-5.30379	down
Lmmp003091	C27H30O16	Quercetin-3-O-(4''-O-glucosyl)rhamnoside	Flavonoids	Flavonols	59262-54-3	B	218000	143840	127850	163230	5008.5	8681.6	7796	7162.03	1.58805	0.0438769	-4.51039	down
Lmsp004166	C27H30O16	Quercetin-3-O-glucoside-7-O-rhamnoside	Flavonoids	Flavonols	-	B	2720200	2949600	2995700	2888500	51296	36388	60012	49232	1.60394	0.0170441	-5.87458	down
mws0059	C27H30O16	Quercetin-3-O-rutinoside (Rutin)	Flavonoids	Flavonols	153-18-4	A	1241300	1333000	1219600	1.26463e+06	22462	18558	27701	22907	1.60498	0.0181136	-5.78679	down
Lmbp002336	C27H30O16	Quercetin-3-O-(2''-O-rhamnosyl)galactoside	Flavonoids	Flavonols	-	B	3291700	4704700	4336900	4111100	162950	111300	179410	151220	1.59843	0.0367833	-4.7648	down
Lmjp002461	C27H30O16	Quercetin-3-O-neohesperidoside	Flavonoids	Flavonols	117611-67-3	A	2366000	3221700	3116600	2.90143e+06	57211	41762	55138	51370.3	1.60361	0.0177052	-5.81969	down
Hmjp002999	C28H32O16	Isorhamnetin-3-O-rutinoside (Narcissin)	Flavonoids	Flavonoid	604-80-8	B	4415900	3733300	4443200	4.19747e+06	45029	108530	78898	77485.7	1.59038	0.0184601	-5.75945	down
Zmxp002867	C28H32O16	Chrysoeriol-5,7-di-O-glucoside	Flavonoids	Flavonoid	-	B	194490	134560	214320	181123	31899	15636	58263	35266	1.46765	0.194707	-2.36062	down
Lmsp004045	C28H32O16	Isorhamnetin-3-O-glucoside-7-O-rhamnoside	Flavonoids	Flavonols	-	A	8974.5	13646	22480	15033.5	1581.8	5311	4198.5	3697.1	1.34717	0.245924	-2.02371	down
pme1540	C28H32O16	Isorhamnetin-3-O-neohesperidoside	Flavonoids	Flavonols	55033-90-4	A	21845	25916	14656	20805.7	5808.8	4753.5	2077.5	4213.27	1.47516	0.202506	-2.30397	down
Lmtp003677	C27H30O17	Quercetin-3-O-sophoroside (Baimaside)	Flavonoids	Flavonols	18609-17-1	B	31677	35542	49400	38873	4618.2	9	9	1545.4	1.34941	0.0397551	-4.65272	down
Lmsp003729	C27H30O17	Myricetin-3-O-rutinoside	Flavonoids	Flavonols	-	B	76104	148110	113890	112701	9	9	9	9	1.60481	7.98571e-05	-13.6122	down
Hmlp002975	C28H30O17	Isorhamnetin-3-O-glucuronide-7-O-rhamnoside	Flavonoids	Flavonols	-	B	441220	362170	365020	389470	7448.2	13143	20425	13672.1	1.58175	0.0351043	-4.83221	down
Lmmp002560	C27H28O18	Quercetin-3-O-(2''-O-glucosyl)glucuronide	Flavonoids	Flavonols	-	B	242200	143980	208460	198213	9	9	9	9	1.60646	4.54056e-05	-14.4268	down
Hmcp001578	C28H32O17	Isorhamnetin-3,7-O-diglucoside	Flavonoids	Flavonols	6758-51-6	B	62465	74053	69959	68825.7	9	9	9	9	1.60653	0.000130765	-12.9007	down
Lmmp003266	C29H30O19	Quercetin-3-O-(2''-malonyl)glucoside-7-O-arabinoside	Flavonoids	Flavonols	-	A	43505	41544	48434	44494.3	9	9	9	9	1.60672	0.000202273	-12.2714	down
Xmyp004678	C32H38O19	Kaempferol-3-O-(2-O-Xylosyl-6-O-Rhamnosyl)Glucoside	Flavonoids	Flavonoid	-	A	13974	13058	9034.8	12022.3	9	9	9	9	1.6059	0.000748611	-10.3835	down
HJAP061	C32H38O20	Quercetin-3-O-(2''-O-arabinosyl)rutinoside	Flavonoids	Flavonols	-	A	2089800	1123500	2271500	1.82827e+06	87635	110380	108220	102078	1.58586	0.0558334	-4.16273	down
Hmcp001618	C32H38O20	Quercetin-3-O-(2''-O-Xylosyl)rutinoside	Flavonoids	Flavonols	129235-39-8	B	47203	30968	43993	40721.3	9	9	9	9	1.60643	0.000221014	-12.1436	down
Lnrp102163	C33H40O20	Quercetin-3-O-rutinoside-7-O-rhamnoside	Flavonoids	Flavonols	-	A	25632	11608	8902.5	15380.8	9	4601.2	2548.8	2386.33	1.01746	0.15515	-2.68827	down
Hmcp001559	C33H40O20	Isorhamnetin-3-O-rutinoside-7-O-arabinoside	Flavonoids	Flavonols	-	B	36914	31891	25585	31463.3	9	9	9	9	1.60652	0.000286047	-11.7715	down
HJAP127	C33H40O20	Quercetin-3-O-(2''-O-Rhamnosyl)rutinoside	Flavonoids	Flavonols	55696-57-6	A	5382000	8708400	7869800	7.32007e+06	183240	127050	213780	174690	1.59722	0.0238645	-5.38899	down
Hmcp001329	C32H38O21	Quercetin-3-O-xylosyl(1→2)glucosyl(1→2)glucoside	Flavonoids	Flavonols	-	A	10900	20507	16947	16118	9	9	9	9	1.604	0.000558382	-10.8065	down
HJAP128	C34H42O20	Isorhamnetin-3-O-rutinoside-7-O-rhamnoside	Flavonoids	Flavonoid	-	A	981320	1153000	1022000	1.05211e+06	154860	199240	283860	212653	1.56602	0.202121	-2.30671	down
HJAP023	C33H40O21	Kaempferol-6,8-di-C-glucoside-7-O-glucoside	Flavonoids	Flavonoid	-	B	20349	16252	14880	17160.3	9	9	9	9	1.60665	0.000524465	-10.8969	down
Hmcp001589	C34H42O21	Isorhamnetin-3-O-rutinoside-4'-O-glucoside	Flavonoids	Flavonols	111393-97-6	B	137340	149950	153230	146840	9	9	9	9	1.60667	6.12912e-05	-13.994	down
Lmhp003162	C34H42O21	Chrysoeriol-6,8-di-C-glucoside-4'-O-glucoside	Flavonoids	Flavonoid	-	B	46111	47144	55699	49651.3	9	9	9	9	1.60658	0.000181264	-12.4296	down
Lmhp002374	C39H50O25	Quercetin-3-O-glucosyl(1→4)rhamnoside-7-O-rutinoside	Flavonoids	Flavonols	-	B	46702	65998	50323	54341	9	9	9	9	1.60602	0.000165621	-12.5598	down
HJAP123	C40H52O25	Isorhamnetin-3-O-rutinoside-7-O-rutinoside	Flavonoids	Flavonoid	-	A	9083.2	20220	10548	13283.7	2820.7	261.7	4422.7	2501.7	1.23462	0.188328	-2.40868	down
pmp000509	C6H6O3	Maltol	Others	Others	118-71-8	B	804920	702230	841980	783043	196710	243050	274520	238093	1.57833	0.304062	-1.71756	down
Zmgn000447	C3H7O7P	3-Phospho-D-glyceric acid	Others	Saccharides and Alcohols	820-11-1	B	1097100	881400	1041000	1006500	400160	265740	513640	393180	1.49214	0.390641	-1.35609	down
pme3705	C6H10O7	D-Glucoronic acid*	Others	Saccharides and Alcohols	6556-12-3	B	88928	97944	65759	84210.3	42438	34340	37431	38069.7	1.52354	0.452078	-1.14536	down
Lmfp001509	C13H16O9	1-O-Galloyl-rhamnose	Tannins	Tannin	-	B	165560	122370	150970	146300	19619	18247	20287	19384.3	1.60169	0.132497	-2.91597	down
Lmsp005625	C22H18O13	3-O-Methylellagic acid-4'-O-(5''-O-acetyl)arabinoside	Tannins	Tannin	-	B	9421.3	4583.1	7060.4	7021.6	9	9	9	9	1.60452	0.00128176	-9.60766	down
mws0704	C2H8NO4P	O-Phosphorylethanolamine	Alkaloids	Alkaloids	1071-23-4	B	73279	75569	81379	76742.3	32519	18508	27283	26103.3	1.54386	0.340143	-1.55579	down
Lmtp001399	C14H17NO7	5,6-Dihydroxyindole-5-O-β-glucoside	Alkaloids	Alkaloids	-	B	143630	168730	125150	145837	9	9	9	9	1.60647	6.17129e-05	-13.9841	down
pmb0776	C20H20N2O3	N-Feruloyltryptamine	Alkaloids	Phenolamine	53905-13-8	A	56322	47291	47998	50537	11837	12252	15735	13274.7	1.58895	0.262672	-1.92866	down
HJAP050	C19H21NO5	N-Feruloyl-3-methoxytyramine	Alkaloids	Phenolamine	78510-19-7	A	97658	263840	142890	168129	26347	25728	82848	44974.3	1.31957	0.267498	-1.9024	down
Lmhp005872	C25H30N2O6	Diferuloylcadaverine	Alkaloids	Phenolamine	-	B	42576	46026	34806	41136	9	9	9	9	1.60649	0.000218786	-12.1582	down
mws1138	C24H26N2O13	Betanin (Betanidin-5-O-glucoside)	Alkaloids	Alkaloids	7659-95-2	B	61594	57765	66809	62056	2526.2	5640.2	3031.5	3732.63	1.57894	0.0601494	-4.05531	down
Lmrn002746	C6H12O3	2-Hydroxy-4-methylpentanoic acid	Organic acids	Organic acids	498-36-2	A	89688	117230	135640	114186	29228	39550	38748	35842	1.54522	0.313891	-1.67166	down
mws2125	C3H5O6P	Phosphoenolpyruvate	Organic acids	Organic acids	138-08-9	B	290480	296020	424140	336880	133130	84420	169280	128943	1.45365	0.382757	-1.3855	down
Lmgn002555	C8H14O4	2-Propylglutaric acid	Organic acids	Organic acids	32806-62-5	A	374690	368580	487050	410107	96264	154260	128020	126181	1.54239	0.307679	-1.7005	down
mws1189	C6H10O7	D-Galacturonic acid*	Organic acids	Organic acids	685-73-4	B	94319	83303	35350	70990.7	25146	49642	31359	35382.3	1.05888	0.498408	-1.0046	down
pmd0136	C26H54NO7P	LysoPC 18:0(2n isomer)	Lipids	LPC	-	A	151770	61631	114160	109187	34820	72905	38227	48650.7	1.19889	0.445572	-1.16627	down
pme1002	C8H11NO	L-Tyramine	Amino acids and derivatives	Amino acids and derivatives	51-67-2	A	2379100	1896700	1883500	2053100	3717500	8199700	5686900	5.86803e+06	1.45787	2.85813	1.51507	up
pme1228	C11H12N2O3	5-Hydroxy-L-tryptophan	Amino acids and derivatives	Amino acids and derivatives	56-69-9	A	9	9	9	9	10651	11053	8836.6	10180.2	1.60671	1131.13	10.1436	up
mws0715	C13H16N2O4	Phenylacetyl-L-glutamine	Amino acids and derivatives	Amino acids and derivatives	28047-15-6	B	13894	7843.1	7287.2	9674.77	18871	31119	15505	21831.7	1.31075	2.25656	1.17412	up
pme1086	C10H17N3O6S	Glutathione reduced form	Amino acids and derivatives	Amino acids and derivatives	70-18-8	A	97226	66353	85456	83011.7	136880	139240	251930	176017	1.34874	2.12038	1.08433	up
pmb0069	C7H7NO	Benzamide	Phenolic acids	Phenolic acids	55-21-0	B	31712000	30514000	33033000	31753000	45586000	93791000	74501000	7.12927e+07	1.41516	2.24523	1.16686	up
ML10179289	C8H10O	2-Phenylethanol	Phenolic acids	Phenolic acids	60-12-8	B	19580000	18542000	21317000	19813000	29372000	71299000	52099000	5.09233e+07	1.39342	2.5702	1.36188	up
Lmhn003240	C11H10O6	Benzoylmalic acid	Phenolic acids	Phenolic acids	22138-51-8	A	2173100	1689100	2176100	2.01277e+06	6374300	15692000	7624100	9896800	1.51098	4.91701	2.29778	up
mws1297	C13H18O6	Benzyl glucoside	Phenolic acids	Phenolic acids	4304-12-5	A	7603.7	6621.1	9555	7926.6	51727	87697	49999	63141	1.57833	7.96571	2.9938	up
pma3724	C17H20O9	1-O-Feruloylquinic acid	Phenolic acids	Phenolic acids	-	B	87917	64612	91646	81391.7	433530	332470	350590	372197	1.57765	4.57291	2.19311	up
pmb0752	C17H20O9	3-O-Feruloylquinic acid	Phenolic acids	Phenolic acids	1899-29-2	B	62625	88003	78115	76247.7	704710	437310	480960	540993	1.57904	7.09521	2.82685	up
Lmbp002309	C17H22O9	Sinapaldehyde-4-O-Glucoside	Phenolic acids	Phenolic acids	154461-65-1	B	19830	13561	6445.5	13278.8	19524	35337	31859	28906.7	1.2019	2.1769	1.12227	up
pme3200	C2H7N3	1-methylguanidine	Nucleotides and derivatives	Nucleotides and derivatives	471-29-4	B	40113	27467	26454	31344.7	51021	107940	59709	72890	1.3542	2.32544	1.2175	up
pmb0374	C5H5N5	2-Aminopurine	Nucleotides and derivatives	Nucleotides and derivatives	452-06-2	A	50306	29486	75818	51870	94635	432720	308470	278608	1.33851	5.37128	2.42527	up
pme0230	C10H13N5O4	Adenosine	Nucleotides and derivatives	Nucleotides and derivatives	58-61-7	A	825350	370120	688850	628107	914010	3795200	2852600	2.5206e+06	1.27831	4.01302	2.00469	up
Lmqp000329	C8H14N3O7P	5-Aminoimidazole ribonucleotide	Nucleotides and derivatives	Nucleotides and derivatives	25635-88-5	A	210880	338530	236180	261863	1009000	1055600	614780	893127	1.51319	3.41066	1.77005	up
mws0884	C10H12N5O6P	Cyclic 3',5'-Adenylic acid	Nucleotides and derivatives	Nucleotides and derivatives	60-92-4	A	73663	38466	62889	58339.3	119310	435580	327000	293963	1.39935	5.03885	2.3331	up
mws1094	C15H12O6	Aromadendrin (Dihydrokaempferol)	Flavonoids	Dihydroflavonol	480-20-6	B	5844	7158.2	7544.7	6848.97	23530	27563	20730	23941	1.58545	3.49556	1.80553	up
mws2209	C21H20O11	Kaempferol-3-O-glucoside (Astragalin)	Flavonoids	Flavonols	480-10-4	B	4500500	3289500	4924000	4238000	6709400	10585000	12832000	1.00421e+07	1.41667	2.36955	1.24461	up
Xmyp005654	C21H20O11	Kaempferol-4'-O-glucoside	Flavonoids	Flavonoid	-	A	760110	658390	708080	708860	1424900	1936300	1169100	1510100	1.49092	2.13032	1.09107	up
Hmpp003270	C21H20O11	Luteolin-4'-O-glucoside	Flavonoids	Flavonoid	6920-38-3	A	6033700	5304400	5030700	5.45627e+06	9270900	12800000	11176000	11082300	1.54085	2.03111	1.02227	up
pme2459	C21H20O11	Luteolin-7-O-glucoside (Cynaroside)	Flavonoids	Flavonoid	5373-11-5	A	165020	195660	163810	174830	4450000	3165000	2633900	3416300	1.59605	19.5407	4.28841	up
Lmtn002796	C21H22O11	Aromadendrin-7-O-glucoside	Flavonoids	Flavonoid	28189-90-4	B	136850	150210	157000	148020	603880	535660	550250	563263	1.60099	3.80532	1.92802	up
mws0057	C21H22O11	Eriodictyol-7-O-glucoside	Flavonoids	Dihydroflavone	38965-51-4	B	5849	3157	6190.5	5065.5	98693	56940	74542	76725	1.57216	15.1466	3.92092	up
Lmmn004625	C21H22O11	Dihydrokaempferol-7-O-glucoside	Flavonoids	Flavonols	-	B	16829	7608.8	7224.8	10554.2	40412	36211	23649	33424	1.41519	3.16689	1.66307	up
Lmzn001894	C21H18O12	Kaempferol-3-O-glucuronide	Flavonoids	Flavonols	22688-78-4	A	941510	896300	837320	891710	5085600	4329600	5181000	4865400	1.59973	5.45626	2.44791	up
mws4167	C21H18O12	Luteolin-7-O-glucuronide	Flavonoids	Flavonoid	29741-10-4	A	3330800	2653000	2945900	2.97657e+06	17339000	16565000	15231000	1.63783e+07	1.59917	5.50242	2.46007	up
Lmmp003767	C21H18O12	Kaempferol-7-O-glucuronide	Flavonoids	Flavonols	-	B	407370	431510	736080	524987	22636000	22412000	31812000	25620000	1.59677	48.8012	5.60885	up
pmp000583	C22H20O12	Diosmetin-7-O-glucuronide	Flavonoids	Flavonoid	35110-20-4	B	906060	610900	671160	729373	1486300	2884200	1679400	2.01663e+06	1.45716	2.76488	1.46722	up
Lmmp003783	C21H18O13	Quercetin-3-O-glucuronide	Flavonoids	Flavonols	22688-79-5	B	9	9	9	9	110810	36439	90207	79152	1.60003	8794.67	13.1024	up
Lmmn003398	C23H22O12	Kaempferol-3-O-(6''-acetyl)glucoside	Flavonoids	Flavonols	-	B	28884	23182	22602	24889.3	132720	115150	96282	114717	1.58466	4.6091	2.20448	up
pmp000587	C24H22O14	Luteolin-7-O-(6''-malonyl)glucoside	Flavonoids	Flavonoid	-	A	9	2258.5	2261.3	1509.6	17920	11612	24509	18013.7	1.16915	11.9327	3.57685	up
Lmdp004892	C24H22O14	Kaempferol-3-O-(6''-malonyl)galactoside	Flavonoids	Flavonols	-	A	390930	378880	407810	392540	2022500	2663000	3069300	2.58493e+06	1.59443	6.58515	2.71922	up
pmb0608	C25H24O14	Chrysoeriol-7-O-(6''-malonyl)glucoside	Flavonoids	Flavonoid	-	A	21429	18595	20719	20247.7	102480	48679	87248	79469	1.50745	3.92485	1.97264	up
HJAP148	C26H28O15	Kaempferol-3-O-sambubioside	Flavonoids	Flavonoid	27661-51-4	A	734430	921880	965810	874040	17980000	15097000	15332000	1.61363e+07	1.60293	18.4618	4.20647	up
Lmsp004670	C27H30O15	Kaempferol-3-O-glucoside-7-O-rhamnoside	Flavonoids	Flavonols	-	A	317260	461780	539190	439410	2012700	1668700	1729600	1.80367e+06	1.56556	4.10475	2.03729	up
pmp001079	C27H30O15	Luteolin-7-O-neohesperidoside (Lonicerin)*	Flavonoids	Flavonoid	25694-72-8	A	9193.2	14448	3775.7	9138.97	221730	133500	102020	152417	1.53146	16.6777	4.05985	up
pmp000593	C27H30O15	Luteolin-7-O-rutinoside*	Flavonoids	Flavonoid	3563-98-2	A	81157	95822	112230	96403	2079900	1538300	1407800	1.67533e+06	1.59731	17.3784	4.11923	up
Lmjp002867	C27H30O15	Kaempferol-3-O-neohesperidoside*	Flavonoids	Flavonols	32602-81-6	A	320770	486920	555020	454237	1708900	1465900	1939100	1.70463e+06	1.55047	3.75274	1.90795	up
Lmsn002815	C27H30O15	Kaempferol-3-O-rutinoside(Nicotiflorin)*	Flavonoids	Flavonoid	17650-84-9	A	496360	739770	972130	736087	3995000	4965400	5280600	4747000	1.57161	6.44897	2.68907	up
Zmcp003989	C27H30O15	Kaempferol-3-O-rhamnosyl(1→2)glucoside	Flavonoids	Flavonoid	-	A	8299.6	6830.3	1016.9	5382.27	1001900	1309500	938900	1.08343e+06	1.56179	201.297	7.65318	up
Hmjp003008	C27H28O16	Luteolin-7-O-glucuronide-5-O-rhamnoside	Flavonoids	Flavonoid	-	A	2691900	2259600	2063300	2.33827e+06	13013000	19432000	18961000	1.71353e+07	1.59018	7.32822	2.87346	up
pmp000596	C27H30O17	Quercetin-3-O-(2''-O-galactosyl)glucoside	Flavonoids	Flavonols	56782-99-1	A	9	9	9	9	17268	14800	26272	19446.7	1.60459	2160.74	11.0773	up
Zmlp003063	C33H40O19	Luteolin-7-O-(2''-O-rhamnosyl)rutinoside	Flavonoids	Flavonoid	-	B	8855.4	7764	10409	9009.47	1478400	1940800	1648200	1.68913e+06	1.60599	187.484	7.55063	up
Lmsp003881	C33H40O19	Kaempferol-3-O-rutinoside-7-O-rhamnoside	Flavonoids	Flavonols	-	A	298620	245850	243490	262653	34079000	44712000	36298000	38363000	1.6059	146.059	7.19041	up
Hmqp002870	C32H38O20	Luteolin-7-O-Sophoroside-5-O-arabinoside	Flavonoids	Flavonoid	-	B	5590	11626	10916	9377.33	1916500	2723300	1748500	2.12943e+06	1.60153	227.083	7.82708	up
Lmyp003857	C35H28O19	Kaempferol-3-O-(2'',6''-digalloyl)glucoside	Flavonoids	Flavonoid	-	B	9325.2	13907	15691	12974.4	918740	775950	832610	842433	1.60229	64.9304	6.02082	up
pmb0676	C38H40O19	Chrysoeriol-8-C-glucoside-7-O-(6''-feruloyl)glucoside	Flavonoids	Flavonoid carbonoside	-	B	4702.7	6503.1	8269.3	6491.7	363060	271740	246270	293690	1.59812	45.2408	5.49955	up
pmb0382	C19H14O6	O-Feruloyl 4-hydroxycoumarin	Lignans and Coumarins	Coumarins	-	B	9	39462	45483	28318	1393800	669720	711470	924997	1.16366	32.6646	5.02966	up
Lmgp003270	C16H16O10	Scopoletin-7-O-glucuronide	Lignans and Coumarins	Coumarins	132752-65-9	B	52796	42740	44711	46749	413960	257540	216220	295907	1.56315	6.32969	2.66213	up
pma0134	C4H8O4	D-(-)-Threose	Others	Saccharides and Alcohols	95-43-2	B	65541	52116	53302	56986.3	97315	213870	142120	151102	1.43909	2.65154	1.40683	up
Zmjp000624	C8H9NO3	Pyridoxal	Others	Vitamin	66-72-8	A	129330	113870	102140	115113	226490	240270	229040	231933	1.57475	2.01483	1.01066	up
pme1841	C5H14N2	Cadaverine	Alkaloids	Phenolamine	462-94-2	B	7716.9	4021.6	4593.8	5444.1	16163	12261	13391	13938.3	1.46047	2.56026	1.35629	up
mws0491	C8H11N	Phenethylamine	Alkaloids	Alkaloids	64-04-0	A	10039000	9352500	10438000	9.94317e+06	14804000	41514000	29508000	2.86087e+07	1.37463	2.87722	1.52467	up
pma0948	C8H11NO	Phenylethanolamine	Alkaloids	Alkaloids	7568-93-6	B	1084500	787450	800560	890837	1391400	3071900	2197000	2220100	1.4008	2.49215	1.31739	up
Lmlp003024	C20H30O7N4	N'-p-Coumaroylagmatine-glucoside	Alkaloids	Phenolamine	-	B	45240	53168	55959	51455.7	84348	76584	160070	107001	1.30907	2.07947	1.05622	up
Lmsn009589	C30H48O6	2α,3β,19α,23-Tetrahydroxyurs-12-en-28-oic acid	Terpenoids	Triterpene	-	B	9	9	9	9	1452.1	1603.8	1420.4	1492.1	1.60701	165.789	7.3732	up
Wmzn000227	C6H10O4	2,2-Dimethylsuccinic acid	Organic acids	Organic acids	597-43-3	A	30069	17149	22461	23226.3	51027	60352	67849	59742.7	1.50022	2.5722	1.363	up
Zmtn001464	C10H7NO4	4,8-Dihydroxyquinoline-2-carboxylic acid	Organic acids	Organic acids	59-00-7	B	9	3539.9	1797.9	1782.27	59538	50254	39310	49700.7	1.27562	27.8862	4.80148	up
mws0120	C8H20NO6P	Choline Alfoscerate	Lipids	PC	28319-77-9	B	85955	121870	108270	105365	418570	449420	281720	383237	1.55296	3.63723	1.86284	up
YC512118	C18H35NO	Oleamide (9-Octadecenamide)	Lipids	Free fatty acids	301-02-0	A	13141	7909.4	6354.9	9135.1	15418	29743	18906	21355.7	1.33665	2.33776	1.22513	up
Lmhp007598	C27H52NO7P	LysoPC 19:2(2n isomer)	Lipids	LPC	-	A	5566.7	5536.6	6649.5	5917.6	7641.1	16407	18184	14077.4	1.32873	2.3789	1.25029	up
