# Supplementary material for: Elucidating the Differentiation Synthesis Mechanisms of Differently Colored Resistance Quinoa Seedings Using Metabolite Profiling and Transcriptome Analysis
Source: Metabolites. 2023 Oct 10;13(10):1065. doi: 10.3390/metabo13101065 (PMC10609267; doi:10.3390/metabo13101065)
Supplement: Supplementary file 1 [file metabolites-13-01065-s001.zip › Table S9.xlsx]

## Sheet: Sheet1
Table S9 Significantly different metabolites in R-RvsR-Y
Index	Formula	Compounds	Class I	Class II	CAS	Level	R-R1	R-R2	R-R3	R-R average	R-Y1	R-Y2	R-Y3	R-Y average	VIP	Fold_Change	Log2FC	Type
pme2914	C6H10O5	3-Hydroxy-3-methylpentane-1,5-dioic acid	Amino acids and derivatives	Amino acids and derivatives	503-49-1	A	439170	259750	280690	326537	116910	182480	92052	130481	1.2942	0.39959	-1.32341	down
pme2758	C5H9NO5	4-Hydroxy-L-glutamic acid	Amino acids and derivatives	Amino acids and derivatives	3913-68-6	A	103430	51270	58059	70919.7	27379	24163	11600	21047.3	1.27735	0.296777	-1.75255	down
Lmbp000123	C6H13NO2S	L-Homomethionine	Amino acids and derivatives	Amino acids and derivatives	25148-30-5	B	681820	312540	621920	538760	39607	29813	18575	29331.7	1.43285	0.0544429	-4.19911	down
pme2559	C6H9NO5	N-Acetyl-L-Aspartic Acid	Amino acids and derivatives	Amino acids and derivatives	997-55-7	A	49759	33743	39601	41034.3	29785	18140	11627	19850.7	1.15657	0.483758	-1.04764	down
pmb0468	C6H11NO3S	N-Formyl-L-Methionine	Amino acids and derivatives	Amino acids and derivatives	4289-98-9	B	208770	159780	114540	161030	24420	22186	59326	35310.7	1.35656	0.21928	-2.18915	down
mws0736	C8H16N2O3	N-Glycyl-L-leucine*	Amino acids and derivatives	Amino acids and derivatives	869-19-2	B	1743800	386190	654140	928043	363910	303910	332100	333307	1.02111	0.35915	-1.47734	down
mws5041	C8H16N2O3	L-Glycyl-L-isoleucine*	Amino acids and derivatives	Amino acids and derivatives	19461-38-2	B	1445500	310470	516380	757450	294090	251840	267650	271193	1.00403	0.358035	-1.48183	down
Zmjp000182	C7H16N4O2	N-Monomethyl-L-arginine	Amino acids and derivatives	Amino acids and derivatives	17035-90-4	B	98643	81061	114740	98148	53128	50765	29681	44524.7	1.29319	0.453648	-1.14035	down
pme0278	C7H14N2O4	2,6-Diaminooimelic acid	Amino acids and derivatives	Amino acids and derivatives	583-93-7	B	25094	24816	15402	21770.7	5503.8	7228.4	3073.9	5268.7	1.35389	0.242009	-2.04687	down
Lmrj001698	C9H18N2O4	L-Seryl-L-Isoleucine	Amino acids and derivatives	Amino acids and derivatives	91086-51-0	A	2573300	371100	872130	1.27218e+06	285910	90017	140370	172099	1.19564	0.135279	-2.88599	down
mws5042	C11H14N2O3	L-Glycyl-L-phenylalanine	Amino acids and derivatives	Amino acids and derivatives	721-66-4	B	700480	159170	295350	385000	172750	120960	124280	139330	1.02623	0.361896	-1.46635	down
Lmhp001670	C11H22N2O3	L-Valyl-L-Leucine	Amino acids and derivatives	Amino acids and derivatives	3989-97-7	B	2721200	436330	1149000	1435510	382350	150760	215680	249597	1.17666	0.173873	-2.52389	down
mws4176	C12H16N2O3	L-Alanyl-L-Phenylalanine	Amino acids and derivatives	Amino acids and derivatives	3061-90-3	B	237740	34866	110550	127719	28055	15813	23433	22433.7	1.17247	0.175649	-2.50923	down
Lmhp002031	C12H24N2O3	L-Leucyl-L-Leucine	Amino acids and derivatives	Amino acids and derivatives	3303-31-9	B	1242600	246820	668020	719147	199770	115690	143300	152920	1.20169	0.212641	-2.23351	down
Lmhp002001	C14H20N2O3	L-Valyl-L-Phenylalanine	Amino acids and derivatives	Amino acids and derivatives	3918-92-1	B	362700	90740	233270	228903	81431	55016	62377	66274.7	1.17691	0.289531	-1.78821	down
mws5035	C15H22N2O3	L-Leucyl-L-phenylalanine	Amino acids and derivatives	Amino acids and derivatives	56217-82-4	B	491550	92364	164150	249355	31146	33892	40563	35200.3	1.29319	0.141166	-2.82454	down
mws0636	C18H20N2O3	L-Phenylalanyl-L-phenylalanine	Amino acids and derivatives	Amino acids and derivatives	2577-40-4	A	55708	15768	50554	40676.7	9233	9448	8990	9223.67	1.27521	0.226756	-2.14079	down
Zmyn002919	C8H8O2	2-Methylbenzoic acid	Phenolic acids	Phenolic acids	118-90-1	B	9002.9	11604	14551	11719.3	3087.9	422.1	1737	1749	1.2681	0.149241	-2.74428	down
mws1078	C7H7NO2	Anthranilic Acid	Phenolic acids	Phenolic acids	118-92-3	B	656190	514570	554190	574983	290120	281880	217480	263160	1.40733	0.457683	-1.12758	down
Lmbn001981	C7H6O3	2,5-Dihydroxybenzaldehyde*	Phenolic acids	Phenolic acids	1194-98-5	B	3295400	1107200	2042400	2.14833e+06	1387400	779320	598110	921610	1.04149	0.428988	-1.22099	down
Lmxp001668	C9H10O2	2-Methoxy-4-ethenylphenol	Phenolic acids	Phenolic acids	7786-61-0	A	1589600	1772200	1402700	1.58817e+06	529010	617560	458980	535183	1.43995	0.336982	-1.56926	down
pme3083	C8H7NO3	2-(Formylamino)benzoic acid	Phenolic acids	Phenolic acids	3342-77-6	B	433540	135830	268620	279330	116970	100070	108300	108447	1.161	0.388239	-1.36498	down
pme0281	C8H6O4	Terephthalic acid	Phenolic acids	Phenolic acids	100-21-0	A	1052000	948110	1170800	1056970	360420	464450	328600	384490	1.43557	0.363766	-1.45892	down
pme3381	C9H10O3	3-Hydroxyphenylacetic Acid Methyl Ester	Phenolic acids	Phenolic acids	42058-59-3	B	10563	15952	19285	15266.7	4658.3	11547	6050	7418.43	1.13631	0.485924	-1.0412	down
mws0028	C8H8O4	Vanillic acid	Phenolic acids	Phenolic acids	121-34-6	B	430370	161550	261630	284517	116410	44048	40604	67020.7	1.25548	0.23556	-2.08584	down
Hmbp001276	C8H8O4	Gallacetophenone	Phenolic acids	Phenolic acids	528-21-2	B	202770	258090	258760	239873	7474.6	22208	17536	15739.5	1.441	0.065616	-3.92981	down
mws1195	C10H10O3	p-Coumaric acid methyl ester*	Phenolic acids	Phenolic acids	3943-97-3	A	375080	563560	408650	449097	320580	176280	117800	204887	1.14687	0.45622	-1.1322	down
mws2212	C9H8O4	Caffeic acid	Phenolic acids	Phenolic acids	331-39-5	A	3181200	861590	2263400	2.10206e+06	1260200	622350	463370	781973	1.01465	0.372003	-1.42661	down
Lmrn001951	C9H10O4	(S)-2-Hydroxy-3-(4-Hydroxyphenyl)Propanoic Acid	Phenolic acids	Phenolic acids	23508-35-2	B	4035.3	9465	3714.5	5738.27	9	9	9	9	1.46313	0.00156842	-9.31647	down
Xmgn006542	C10H10O4	Dimethyl Phthalate	Phenolic acids	Phenolic acids	131-11-3	B	80179	107770	101380	96443	42189	32226	29805	34740	1.40536	0.360213	-1.47308	down
mws0014	C10H10O4	Ferulic acid	Phenolic acids	Phenolic acids	537-98-4	A	21064000	5506400	12873000	13147800	975870	1723800	1285600	1.32842e+06	1.38751	0.101038	-3.30703	down
Lmdn003756	C10H10O4	Methyl caffeate	Phenolic acids	Phenolic acids	3843-74-1	A	129220	91156	86142	102173	37905	3744.5	2155.8	14601.8	1.20234	0.142913	-2.80679	down
mws1212	C11H12O4	Methyl ferulate	Phenolic acids	Phenolic acids	2309-07-1	A	8954800	12695000	9944800	1.05315e+07	2233800	2744100	1825100	2.26767e+06	1.43687	0.215322	-2.21544	down
pmb2620	C11H12O4	3,4-Dimethoxycinnamic acid	Phenolic acids	Phenolic acids	14737-89-4	A	4325900	6172900	5048200	5.18233e+06	860400	1378800	952120	1.06377e+06	1.4383	0.205269	-2.28441	down
Lmhn003240	C11H10O6	Benzoylmalic acid	Phenolic acids	Phenolic acids	22138-51-8	A	2173100	1689100	2176100	2.01277e+06	78649	95234	107410	93764.3	1.47206	0.0465848	-4.424	down
pmn001669	C12H14O5	Methyl sinapate	Phenolic acids	Phenolic acids	20733-94-2	A	9285.7	20745	8076.9	12702.5	5929.7	3544.5	1362.9	3612.37	1.12518	0.284382	-1.8141	down
Lmhn003373	C11H10O7	p-Hydroxybenzoylmalic acid	Phenolic acids	Phenolic acids	-	B	689170	396010	550790	545323	12034	10695	14128	12285.7	1.46874	0.0225291	-5.47206	down
pme3472	C12H16O7	Arbutin	Phenolic acids	Phenolic acids	497-76-7	B	76222	100240	94333	90265	33686	31739	15330	26918.3	1.33817	0.298215	-1.74558	down
Hmtn001120	C14H20O8	5-(2-Hydroxyethyl)-2-O-glucosylphenol	Phenolic acids	Phenolic acids	-	A	257410	292060	255340	268270	41626	175240	172100	129655	1.05132	0.483302	-1.049	down
pmn001690	C16H24O7	3-Hydroxy-4-isopropylbenzylalcohol-3-O-glucoside	Phenolic acids	Phenolic acids	-	B	308340	210730	271680	263583	107450	45501	43767	65572.7	1.33842	0.248774	-2.00709	down
Lmmn003663	C14H18O9	5-Glucosyloxy-2-Hydroxybenzoic acid methyl ester	Phenolic acids	Phenolic acids	-	B	82981	54811	52246	63346	4361.6	5940.2	8119.6	6140.47	1.4548	0.0969353	-3.36683	down
Zmhn001883	C14H18O9	Vanillic acid-4-O-glucoside	Phenolic acids	Phenolic acids	32142-31-7	B	54340	82784	65934	67686	3232.4	7400.1	3886.2	4839.57	1.44383	0.0715003	-3.80591	down
Lmtn000940	C14H18O10	1-O-(3,4-Dihydroxy-5-methoxy-benzoyl)-glucoside	Phenolic acids	Phenolic acids	-	B	35947	49272	36500	40573	14749	16861	16763	16124.3	1.42884	0.397415	-1.33128	down
Zmhn002422	C16H20O9	1-O-Feruloyl-D-Glucose	Phenolic acids	Phenolic acids	-	A	27040000	25892000	23749000	2.55603e+07	13710000	9832300	7769900	10437400	1.36455	0.408344	-1.29214	down
Hmmn002544	C16H20O9	Ferulic acid-4-O-glucoside	Phenolic acids	Phenolic acids	117405-51-3	A	928760	1189800	1056000	1.05819e+06	88539	177220	88946	118235	1.44081	0.111734	-3.16187	down
Zmhn002334	C16H20O9	6-O-Feruloyl-D-glucose	Phenolic acids	Phenolic acids	137887-25-3	B	4406600	5492900	5283100	5.06087e+06	630400	1021800	606170	752790	1.44733	0.148747	-2.74907	down
pmb2940	C17H22O10	1-O-Glucosyl sinapate	Phenolic acids	Phenolic acids	78185-48-5	B	849110	1484500	1071800	1.13514e+06	548790	569730	287440	468653	1.23366	0.412861	-1.27627	down
pmb3072	C22H26O12	3-O-p-Coumaroylshikimic acid-O-glucoside	Phenolic acids	Phenolic acids	-	B	31397	52493	40082	41324	11993	6566	16258	11605.7	1.32935	0.280846	-1.83215	down
pmb0824	C25H28O13	Syringic acid-4-O-(6''-feruloyl)glucoside	Phenolic acids	Phenolic acids	-	B	157590	163950	171920	164487	20130	20155	12522	17602.3	1.45216	0.107014	-3.22413	down
pme3200	C2H7N3	1-methylguanidine	Nucleotides and derivatives	Nucleotides and derivatives	471-29-4	B	40113	27467	26454	31344.7	9	7407.1	1621.1	3012.4	1.08911	0.0961057	-3.37923	down
mws0255	C4H5N3O	Cytosine	Nucleotides and derivatives	Nucleotides and derivatives	71-30-7	B	10215000	4088000	4845300	6.38277e+06	1588800	1975900	1433100	1.66593e+06	1.34457	0.261005	-1.93785	down
pme0040	C5H5N5	Adenine	Nucleotides and derivatives	Nucleotides and derivatives	73-24-5	A	70529000	27141000	49927000	49199000	23427000	14521000	12021000	1.66563e+07	1.22932	0.33855	-1.56256	down
pme0033	C5H4N4O	Hypoxanthine	Nucleotides and derivatives	Nucleotides and derivatives	68-94-0	B	97997	124040	73575	98537.3	14713	35563	46825	32367	1.26655	0.328474	-1.60615	down
pme1109	C5H5N5O	Guanine	Nucleotides and derivatives	Nucleotides and derivatives	73-40-5	A	1895200	475940	1031000	1.13405e+06	287520	258440	244550	263503	1.26718	0.232357	-2.10559	down
pme3732	C9H13N3O5	Cytidine	Nucleotides and derivatives	Nucleotides and derivatives	65-46-3	B	1373500	407380	699770	826883	311880	269830	196770	259493	1.20404	0.313821	-1.67199	down
mws0248	C9H12N2O6	Uridine	Nucleotides and derivatives	Nucleotides and derivatives	58-96-8	A	1840000	302320	873320	1.00521e+06	197560	187970	156790	180773	1.21071	0.179836	-2.47525	down
pme1178	C10H13N5O5	Guanosine	Nucleotides and derivatives	Nucleotides and derivatives	118-00-3	A	27458000	8689700	15399000	1.71822e+07	9281600	4215600	3102800	5.53333e+06	1.12815	0.322038	-1.6347	down
Lmqp000329	C8H14N3O7P	5-Aminoimidazole ribonucleotide	Nucleotides and derivatives	Nucleotides and derivatives	25635-88-5	A	210880	338530	236180	261863	75346	81911	36591	64616	1.34702	0.246755	-2.01885	down
mws0675	C11H15N2O8P	β-Nicotinamide mononucleotide	Nucleotides and derivatives	Nucleotides and derivatives	1094-61-7	B	647470	234920	559410	480600	82102	122180	83320	95867.3	1.35946	0.199474	-2.32573	down
pmb0998	C10H14N5O8P	Guanosine 5'-monophosphate	Nucleotides and derivatives	Nucleotides and derivatives	85-32-5	A	533200	106960	373760	337973	128080	92439	117610	112710	1.01126	0.333487	-1.5843	down
mws0051	C16H12O5	Acacetin	Flavonoids	Flavonoid	480-44-4	B	275940	1070500	948950	765130	221940	209890	126490	186107	1.16675	0.243235	-2.03958	down
mws0129	C16H12O5	Genkwanin (Apigenin 7-methyl ether)	Flavonoids	Flavonoid	437-64-9	B	269920	1071500	905940	749120	216200	201860	120530	179530	1.16837	0.239655	-2.06097	down
mws1068	C15H10O6	Kaempferol (3,5,7,4'-Tetrahydroxyflavone)	Flavonoids	Flavonols	520-18-3	A	421150	329740	435890	395593	73036	39193	31147	47792	1.41847	0.120811	-3.04918	down
pme2954	C15H10O7	Quercetin	Flavonoids	Flavonols	117-39-5	A	896420	700820	811360	802867	106670	97215	55952	86612.3	1.44107	0.107879	-3.21252	down
mws0066	C16H12O7	Isorhamnetin	Flavonoids	Flavonols	480-19-3	A	2503700	1857300	2068800	2.14327e+06	39857	102190	73252	71766.3	1.4608	0.0334846	-4.90036	down
Lmbp003668	C20H18O10	Kaempferol-3-O-arabinoside	Flavonoids	Flavonoid	-	B	2570200	1208600	1439700	1739500	692780	94605	37916	275100	1.1737	0.158149	-2.66064	down
mws0919	C21H20O10	Kaempferol-3-O-rhamnoside (Afzelin)	Flavonoids	Flavonols	482-39-3	A	77962	39973	45821	54585.3	4006.2	9	9	1341.4	1.22683	0.0245744	-5.3467	down
pme0321	C21H20O10	Kaempferol-7-O-rhamnoside	Flavonoids	Flavonols	20196-89-8	B	22741	17810	16309	18953.3	8519.7	3028.2	3740.8	5096.23	1.31435	0.268883	-1.89495	down
Hmcp002316	C21H20O11	Isorhamnetin-3-O-arabinoside	Flavonoids	Flavonols	-	A	8535900	6706200	5327000	6.85637e+06	853170	1160600	612720	875497	1.43695	0.127691	-2.96927	down
mws2209	C21H20O11	Kaempferol-3-O-glucoside (Astragalin)	Flavonoids	Flavonols	480-10-4	B	4500500	3289500	4924000	4238000	3370800	618780	383330	1.45764e+06	1.06565	0.343944	-1.53975	down
mws0045	C21H20O11	Quercetin-3-O-rhamnoside(Quercitrin)	Flavonoids	Flavonols	522-12-3	B	383920	235480	303030	307477	21135	9	9	7051	1.19896	0.0229318	-5.44651	down
Hmpp003270	C21H20O11	Luteolin-4'-O-glucoside	Flavonoids	Flavonoid	6920-38-3	A	6033700	5304400	5030700	5.45627e+06	894970	461650	404310	586977	1.42716	0.107578	-3.21654	down
Lmlp003531	C21H20O11	Luteolin-3'-O-glucoside	Flavonoids	Flavonoid	5154-41-6	A	7573800	5130000	5543200	6.08233e+06	956150	424090	429110	603117	1.41974	0.0991588	-3.33412	down
HJN086	C21H22O11	Eriodictyol-3'-O-glucoside	Flavonoids	Dihydroflavone	-	B	17047	22312	27933	22430.7	17200	9350.3	5731.6	10760.6	1.08346	0.479729	-1.05971	down
Lmmn004625	C21H22O11	Dihydrokaempferol-7-O-glucoside	Flavonoids	Flavonols	-	B	16829	7608.8	7224.8	10554.2	3574.6	2537	901.55	2337.72	1.23262	0.221496	-2.17465	down
Hmcp002539	C22H22O11	Isorhamnetin-3-O-rhamnoside	Flavonoids	Flavonols	-	B	2863200	2458000	1866900	2.39603e+06	20175	42577	12070	24940.7	1.45206	0.0104091	-6.586	down
HJAP135	C24H24O12	Pinocembrin-7-O-(6''-O-malonyl)glucoside	Flavonoids	Flavonoid	-	A	2765800	3019500	2938100	2907800	1848000	582400	426060	952153	1.18915	0.327448	-1.61066	down
Li512111	C24H24O13	Isorhamnetin-3-O-(6''-acetylglucoside)	Flavonoids	Flavonols	-	B	55913	76793	64429	65711.7	7755.1	4139.9	6345.6	6080.2	1.44355	0.0925285	-3.43396	down
HJAP064	C25H24O15	Isorhamnetin-3-O-(6''-malonylglucoside)	Flavonoids	Flavonoid	-	B	311220	291540	279590	294117	119370	56628	63814	79937.3	1.37626	0.271788	-1.87945	down
Lmnp002741	C27H30O14	Genkwanin-6-C-(2''-O-apiosyl)glucoside	Flavonoids	Flavonoid carbonoside	-	B	146400	175820	122470	148230	9	9	9	9	1.47138	6.07165e-05	-14.0076	down
Hmjn004446	C30H26O13	Luteolin-7-O-(6''-caffeoyl)rhamnoside	Flavonoids	Flavonoid	-	B	500750	480690	465450	482297	72288	39838	31910	48012	1.43074	0.0995487	-3.32845	down
pmp001080	C28H32O15	Diosmetin-7-O-Neohesperidoside (Neodiosmin)	Flavonoids	Flavonoid	38665-01-9	B	195470	158750	149520	167913	65406	64371	64426	64734.3	1.45373	0.385522	-1.37511	down
Hmcp001559	C33H40O20	Isorhamnetin-3-O-rutinoside-7-O-arabinoside	Flavonoids	Flavonols	-	B	36914	31891	25585	31463.3	9	5522.5	6825.6	4119.03	1.00856	0.130915	-2.93329	down
Hmjp002337	C10H8O4	Isoscopoletin (6-Hydroxy-7-Methoxycoumarin)	Lignans and Coumarins	Coumarins	776-86-3	B	342300	303410	340680	328797	135720	119720	52650	102697	1.3095	0.312341	-1.67881	down
Rfmb25702	C28H34O12	Pinoresinol-4-O-(6''-acetyl)glucoside	Lignans and Coumarins	Lignans	-	B	119570	147060	106580	124403	15096	3268.3	5226.5	7863.6	1.38996	0.0632105	-3.98369	down
pmp000509	C6H6O3	Maltol	Others	Others	118-71-8	B	804920	702230	841980	783043	9	9	9	9	1.47228	1.14936e-05	-16.4088	down
pme3705	C6H10O7	D-Glucoronic acid*	Others	Saccharides and Alcohols	6556-12-3	B	88928	97944	65759	84210.3	16262	12937	6114.3	11771.1	1.39107	0.139782	-2.83875	down
Zmzn000079	C4H9O7P	D-Erythrose-4-phosphate	Others	Saccharides and Alcohols	585-18-2	B	154200	101910	149610	135240	51615	76460	65221	64432	1.35118	0.476427	-1.06967	down
pma3101	C11H14NO6+	Nicotinate D-ribonucleoside	Others	Vitamin	17720-18-2	B	3042100	742170	1367700	1.71732e+06	635630	465030	314860	471840	1.16256	0.274753	-1.86379	down
Zmyn000110	C6H14NO8P	D-Glucosamine 1-phosphate	Others	Saccharides and Alcohols	2152-75-2	B	56314	53433	80795	63514	22674	52516	17403	30864.3	1.11475	0.485945	-1.04113	down
mws1090	C6H13O9P	Glucose-1-phosphate*	Others	Saccharides and Alcohols	59-56-3	A	4720800	4312000	4730800	4.58787e+06	2166400	2094800	1807300	2.02283e+06	1.45108	0.440909	-1.18145	down
mws0866	C6H13O9P	D-Glucose 6-phosphate*	Others	Saccharides and Alcohols	56-73-5	A	5852800	5965100	6183900	6000600	2396600	2778900	1845100	2340200	1.42222	0.389994	-1.35847	down
pme3313	C6H13O9P	D-Fructose 6-phosphate*	Others	Saccharides and Alcohols	643-13-0	A	904560	620130	962210	828967	330910	412450	346660	363340	1.39019	0.438305	-1.18999	down
pmb0789	C14H21NO8	Pyridoxine-5'-O-glucoside	Others	Vitamin	-	B	382650	313400	423620	373223	177660	175400	168530	173863	1.43541	0.465843	-1.10209	down
Lmfp001509	C13H16O9	1-O-Galloyl-rhamnose	Tannins	Tannin	-	B	165560	122370	150970	146300	22062	20897	24081	22346.7	1.46773	0.152746	-2.7108	down
Lmsp005625	C22H18O13	3-O-Methylellagic acid-4'-O-(5''-O-acetyl)arabinoside	Tannins	Tannin	-	B	9421.3	4583.1	7060.4	7021.6	9	3511.5	9	1176.5	1.12729	0.167554	-2.5773	down
pme2292	C4H12N2	Putrescine	Alkaloids	Phenolamine	110-60-1	B	103760	37011	52903	64558	18474	24507	22325	21768.7	1.26922	0.337195	-1.56834	down
mws0704	C2H8NO4P	O-Phosphorylethanolamine	Alkaloids	Alkaloids	1071-23-4	B	73279	75569	81379	76742.3	29768	48349	33072	37063	1.37566	0.482954	-1.05004	down
mws0005	C10H12N2	Tryptamine	Alkaloids	Plumerane	61-54-1	A	25655000	12550000	14506000	1.75703e+07	1286800	1859100	2323700	1823200	1.44226	0.103766	-3.2686	down
pmb0774	C10H12N2O	N-Hydroxytryptamine*	Alkaloids	Phenolamine	-	A	6059900	5106600	3820900	4995800	787860	716050	1589800	1.03124e+06	1.3998	0.206421	-2.27634	down
pme2024	C10H12N2O	Serotonin*	Alkaloids	Plumerane	50-67-9	A	7601800	6772800	5234000	6536200	1030200	1060500	2053200	1381300	1.41549	0.211331	-2.24243	down
Zmtn001624	C10H7NO3	N-Acetylisatin	Alkaloids	Plumerane	574-17-4	A	715670	577770	586490	626643	174350	151290	93713	139784	1.4158	0.223068	-2.16444	down
mws0677	C12H14N2O2	N-Acetyl-5-hydroxytryptamine	Alkaloids	Alkaloids	1210-83-9	B	242220	254670	237100	244663	56401	149820	117200	107807	1.2574	0.440634	-1.18235	down
pmp001252	C17H17NO3	p-Coumaroyltyramine	Alkaloids	Phenolamine	36417-86-4	B	3193.3	18476	8119.4	9929.57	9	9	9	9	1.45133	0.000906384	-10.1076	down
Lmtp001399	C14H17NO7	5,6-Dihydroxyindole-5-O-β-glucoside	Alkaloids	Alkaloids	-	B	143630	168730	125150	145837	9	9	9	9	1.47154	6.17129e-05	-13.9841	down
mws0983	C20H39NO2	N-Oleoylethanolamine	Alkaloids	Alkaloids	111-58-0	B	273900	67372	97473	146248	38008	35943	42353	38768	1.20306	0.265083	-1.91548	down
pmb0776	C20H20N2O3	N-Feruloyltryptamine	Alkaloids	Phenolamine	53905-13-8	A	56322	47291	47998	50537	7493.9	9571.3	20198	12421.1	1.38238	0.245782	-2.02455	down
Lmlp003024	C20H30O7N4	N'-p-Coumaroylagmatine-glucoside	Alkaloids	Phenolamine	-	B	45240	53168	55959	51455.7	15073	9	9	5030.33	1.11437	0.0977605	-3.3546	down
Lmhp005872	C25H30N2O6	Diferuloylcadaverine	Alkaloids	Phenolamine	-	B	42576	46026	34806	41136	9	9	7312	2443.33	1.21446	0.0593965	-4.07348	down
mws1138	C24H26N2O13	Betanin (Betanidin-5-O-glucoside)	Alkaloids	Alkaloids	7659-95-2	B	61594	57765	66809	62056	49413	17899	5337	24216.3	1.01257	0.390234	-1.35759	down
Lmsn012425	C30H48O4	Rubusic acid (3β,7α-Dihydroxyolean-12-en-28-oic acid)	Terpenoids	Triterpene	23984-26-1	A	37399	7100.7	15334	19944.6	6065.3	3017.9	6308.9	5130.7	1.10613	0.257248	-1.95877	down
mws0823	C5H8O3	3-Methyl-2-Oxobutanoic acid	Organic acids	Organic acids	759-05-7	B	81993	69378	71250	74207	22968	49129	28496	33531	1.30769	0.451858	-1.14606	down
pme3034	C5H8O4	Ethylmalonic acid	Organic acids	Organic acids	601-75-2	B	32451	22933	30183	28522.3	9777.9	15079	9252.6	11369.8	1.37639	0.398629	-1.32688	down
pme0243	C5H8O4	Glutaric acid	Organic acids	Organic acids	110-94-1	B	788680	520480	657540	655567	296590	433440	199740	309923	1.23791	0.472756	-1.08083	down
Lmmn000806	C5H8O4	Dimethylmalonic acid*	Organic acids	Organic acids	595-46-0	A	247070	153190	303940	234733	95192	141900	49203	95431.7	1.16041	0.406554	-1.29848	down
Lmbn001364	C5H8O4	4-Hydroxy-2-Oxopentanoic Acid*	Organic acids	Organic acids	3318-73-8	B	235720	162150	296620	231497	76675	141610	50675	89653.3	1.21693	0.387277	-1.36856	down
Lmbn001288	C5H8O4	2-Hydroxy-2-methyl-3-oxobutanoic acid*	Organic acids	Organic acids	71698-08-3	B	245470	164060	290430	233320	84465	138900	45463	89609.3	1.19986	0.384062	-1.38059	down
mws0473	C5H8O4	2-Methylsuccinic acid*	Organic acids	Organic acids	498-21-5	A	2716800	1822800	3148700	2.56277e+06	1051200	1691400	564740	1.10245e+06	1.1585	0.430178	-1.21699	down
Lmrn002746	C6H12O3	2-Hydroxy-4-methylpentanoic acid	Organic acids	Organic acids	498-36-2	A	89688	117230	135640	114186	2745.9	44047	33129	26640.6	1.12302	0.233309	-2.09969	down
mws0341	C6H12O3	2-Hydroxyisocaproic acid	Organic acids	Organic acids	20312-37-2	A	90397	29337	55432	58388.7	23207	18524	16644	19458.3	1.22766	0.333255	-1.5853	down
mws0208	C6H10O4	Adipic Acid*	Organic acids	Organic acids	124-04-9	B	992240	664080	647270	767863	340330	483310	293610	372417	1.29431	0.485004	-1.04393	down
Lmbn001609	C6H10O4	2-Acetyl-2-Hydroxybutanoic Acid	Organic acids	Organic acids	-	B	135990	95359	85646	105665	42348	65098	37757	48401	1.29897	0.458061	-1.12639	down
mws0924	C6H10O4	2-Methylglutaric acid*	Organic acids	Organic acids	617-62-9	B	875860	589220	502670	655917	281600	379960	260200	307253	1.30384	0.468433	-1.09408	down
Lmbn001676	C6H10O4	3-Hydroxy-3-Methyl-2-Oxopentanoic Acid	Organic acids	Organic acids	-	B	18676	14618	26550	19948	5338.1	12289	2270.8	6632.63	1.14658	0.332496	-1.58859	down
mws2125	C3H5O6P	Phosphoenolpyruvate	Organic acids	Organic acids	138-08-9	B	290480	296020	424140	336880	74319	116090	162390	117600	1.35049	0.349085	-1.51835	down
Lmgn002555	C8H14O4	2-Propylglutaric acid	Organic acids	Organic acids	32806-62-5	A	374690	368580	487050	410107	25129	272980	143680	147263	1.06556	0.359085	-1.4776	down
mws0242	C8H14O4	Suberic Acid	Organic acids	Organic acids	505-48-6	B	157060	89181	84685	110309	43590	49129	36312	43010.3	1.33509	0.389909	-1.35879	down
mws1189	C6H10O7	D-Galacturonic acid*	Organic acids	Organic acids	685-73-4	B	94319	83303	35350	70990.7	17387	16874	7560.4	13940.5	1.29939	0.19637	-2.34835	down
Lmmn003323	C16H32O3	2-Hydroxyhexadecanoic acid	Organic acids	Organic acids	764-67-0	B	597640	182340	276630	352203	140580	154330	141260	145390	1.10661	0.412801	-1.27648	down
pmb2657	C10H18N4O6	Argininosuccinic acid	Organic acids	Organic acids	2387-71-5	B	264980	225630	227840	239483	121420	100310	70763	97497.7	1.37139	0.407117	-1.29649	down
mws0120	C8H20NO6P	Choline Alfoscerate	Lipids	PC	28319-77-9	B	85955	121870	108270	105365	34629	46841	20055	33841.7	1.32839	0.321185	-1.63852	down
pmb2791	C18H30O4	9-Hydroperoxy-10E,12,15Z-octadecatrienoic acid	Lipids	Free fatty acids	111004-08-1	A	107730	325870	192350	208650	119190	93157	60192	90846.3	1.01639	0.435401	-1.19958	down
Lmhp011562	C21H36O4	1-α-Linolenoyl-glycerol	Lipids	Glycerol ester	-	A	8559000	3461900	6817300	6279400	2416100	2298400	2420100	2378200	1.27571	0.37873	-1.40076	down
Lmhp011388	C21H36O4	2-α-Linolenoyl-glycerol	Lipids	Glycerol ester	55268-58-1	A	4427800	1629000	3439900	3.16557e+06	705430	958390	852200	838673	1.33578	0.264936	-1.91628	down
Lmhp012042	C21H38O4	2-Linoleoylglycerol	Lipids	Glycerol ester	3443-82-1	A	770930	408700	584680	588103	301470	294710	209640	268607	1.28091	0.456734	-1.13057	down
Lmhp112042	C21H38O4	1-Linoleoylglycerol	Lipids	Glycerol ester	2277-28-3	A	854620	424300	579230	619383	304130	285780	224120	271343	1.28761	0.438086	-1.19071	down
Lmhp008337	C19H40NO7P	LysoPE 14:0(2n isomer)	Lipids	LPE	-	B	32267	13159	21920	22448.7	13991	7032.8	11636	10886.6	1.07173	0.484955	-1.04408	down
pmb0864	C19H40NO7P	LysoPE 14:0	Lipids	LPE	-	B	153900	49416	89175	97497	52061	32793	38607	41153.7	1.09408	0.422102	-1.24434	down
Lmhp008440	C20H40NO7P	LysoPE 15:1	Lipids	LPE	-	A	7375.1	3975.4	5244.7	5531.73	9	9	9	9	1.47151	0.00162698	-9.26359	down
Lmhp008273	C20H40NO7P	LysoPE 15:1(2n isomer)	Lipids	LPE	-	B	2526.3	721.77	2042.6	1763.56	365.38	429.11	586.32	460.27	1.24946	0.26099	-1.93794	down
Lmhp009187	C20H42NO7P	LysoPE 15:0	Lipids	LPE	-	A	85275	28327	46863	53488.3	30841	19192	22352	24128.3	1.0615	0.451095	-1.1485	down
Lmhp007836	C21H38NO7P	LysoPE 16:3	Lipids	LPE	-	A	61512	39912	58377	53267	30246	18767	21024	23345.7	1.32092	0.438276	-1.19009	down
Lmhp008763	C21H42NO7P	LysoPE 16:1(2n isomer)	Lipids	LPE	-	A	108420	44549	77698	76889	26028	17459	16262	19916.3	1.3398	0.259027	-1.94883	down
Lmhp009034	C21H42NO7P	LysoPE 16:1	Lipids	LPE	-	A	212310	92850	148120	151093	90248	44510	62989	65915.7	1.16325	0.436258	-1.19675	down
pmb0876	C21H44NO7P	LysoPE 16:0	Lipids	LPE	53862-35-4	A	16050000	4390200	7858300	9.43283e+06	4087900	2966800	4007200	3687300	1.07894	0.390901	-1.35513	down
Lmhp009464	C22H44NO7P	LysoPE 17:1(2n isomer)	Lipids	LPE	-	A	43941	15266	23619	27608.7	12037	7139.4	13432	10869.5	1.14461	0.393698	-1.34484	down
Lmhp009769	C22H44NO7P	LysoPE 17:1	Lipids	LPE	-	A	47945	14824	26116	29628.3	13564	9323.7	9538.3	10808.7	1.16176	0.364808	-1.45479	down
pmd0130	C22H46NO7P	LysoPC 14:0	Lipids	LPC	20559-16-4	A	61124	35672	62456	53084	26570	22111	23150	23943.7	1.32296	0.451052	-1.14863	down
Lmhp008233	C23H40NO7P	LysoPE 18:4	Lipids	LPE	-	A	4835.5	3196.9	5840.6	4624.33	2165	1968.9	1065.3	1733.07	1.26924	0.374771	-1.41592	down
Lmhp008589	C23H42NO7P	LysoPE 18:3(2n isomer)	Lipids	LPE	-	A	7425400	3322300	5570900	5.43953e+06	2149500	2227600	1583400	1.98683e+06	1.30403	0.365258	-1.45301	down
pmb0874	C23H44NO7P	LysoPE 18:2(2n isomer)	Lipids	LPE	-	A	30136000	13909000	23153000	2.23993e+07	9423600	8147300	6237100	7936000	1.31192	0.354296	-1.49697	down
pmb0881	C23H44NO7P	LysoPE 18:2	Lipids	LPE	-	A	14127000	6364300	10698000	1.03964e+07	5363600	3760400	3928800	4.35093e+06	1.25239	0.418502	-1.25669	down
pmb2260	C23H46NO7P	LysoPC 15:1	Lipids	LPC	-	A	16793	10701	17762	15085.3	3394.7	4895.8	5289.1	4526.53	1.40715	0.300062	-1.73667	down
pmb0856	C23H46NO7P	LysoPE 18:1(2n isomer)	Lipids	LPE	-	A	4719700	1315800	2932800	2.98943e+06	1106000	1105600	1221700	1.14443e+06	1.11804	0.382826	-1.38524	down
pmb0883	C23H48NO7P	LysoPE 18:0	Lipids	LPE	69747-55-3	A	143080	30120	61795	78331.7	19017	14395	21194	18202	1.20669	0.232371	-2.1055	down
Lmhp009129	C23H48NO7P	LysoPC 15:0(2n isomer)	Lipids	LPC	-	A	40128	18087	33338	30517.7	18417	10627	11493	13512.3	1.17604	0.442771	-1.17537	down
Hmyn007168	C22H45O9P	LysoPG 16:0	Lipids	Glycerol ester	-	B	9466900	3899600	5776300	6.38093e+06	2799600	3210600	2326100	2.77877e+06	1.21627	0.43548	-1.19932	down
pmb0863	C24H46NO7P	LysoPC 16:2(2n isomer)	Lipids	LPC	-	A	59912	39258	69082	56084	27864	26357	22100	25440.3	1.33042	0.453611	-1.14047	down
Lmhp008833	C24H48NO7P	LysoPC 16:1(2n isomer)	Lipids	LPC	-	A	592720	296810	570540	486690	167640	156660	120370	148223	1.35699	0.304554	-1.71523	down
Lmhp010040	C25H46NO7P	LysoPE 20:3	Lipids	LPE	-	A	28262	10231	20161	19551.3	10110	6415.3	7044.1	7856.47	1.16686	0.401838	-1.31531	down
Lmhp009802	C25H46NO7P	LysoPE 20:3(2n isomer)	Lipids	LPE	-	A	30086	8535.2	20189	19603.4	10023	7244	8157.8	8474.93	1.02285	0.43232	-1.20983	down
Lmhp010514	C25H48NO7P	LysoPE 20:2(2n isomer)	Lipids	LPE	-	A	28310	10293	16349	18317.3	6686.2	5039.3	5517.5	5747.67	1.291	0.313783	-1.67216	down
Lmhp008718	C25H48NO7P	LysoPC 17:2	Lipids	LPC	-	A	69809	27594	60204	52535.7	18258	15106	12297	15220.3	1.30674	0.289714	-1.7873	down
Lmhp010757	C25H48NO7P	LysoPE 20:2	Lipids	LPE	-	A	74464	18250	42091	44935	18471	10828	13181	14160	1.12836	0.315122	-1.66602	down
Hmqp006235	C26H46NO7P	LysoPC 18:4	Lipids	LPC	-	A	26945	13562	24537	21681.3	8564.7	10964	6322.4	8617.03	1.27497	0.39744	-1.33119	down
pmp001251	C26H50NO7P	LysoPC 18:2(2n isomer)	Lipids	LPC	-	A	3154300	1505700	2935800	2.53193e+06	1091200	977610	820480	963097	1.2999	0.38038	-1.39449	down
Lmhp010190	C26H52NO7P	LysoPC 18:1(2n isomer)	Lipids	LPC	-	A	45722000	16699000	39712000	3.40443e+07	14806000	16220000	16880000	1.59687e+07	1.09405	0.469055	-1.09217	down
mws0126	C26H54NO7P	LysoPC 18:0	Lipids	LPC	19420-57-6	A	830230	321110	586550	579297	241950	212180	246150	233427	1.23807	0.402948	-1.31133	down
pmd0136	C26H54NO7P	LysoPC 18:0(2n isomer)	Lipids	LPC	-	A	151770	61631	114160	109187	62064	38546	51026	50545.3	1.13954	0.462924	-1.11115	down
Lmhp007840	C27H52NO7P	LysoPC 19:2	Lipids	LPC	-	A	44823	14032	29432	29429	6357.8	5475.2	5163.9	5665.63	1.35238	0.192519	-2.37693	down
Lmhp010908	C27H54NO7P	LysoPC 19:1	Lipids	LPC	-	A	36585	7942	22575	22367.3	7380.1	9475.5	8397.6	8417.73	1.00077	0.37634	-1.40989	down
pmd0146	C28H54NO7P	LysoPC 20:2(2n isomer)	Lipids	LPC	-	A	69907	29820	59599	53108.7	28184	22489	21402	24025	1.18751	0.452374	-1.14441	down
Lmhp011549	C28H56NO7P	LysoPC 20:1	Lipids	LPC	-	A	55967	20263	37285	37838.3	11915	16675	23254	17281.3	1.10166	0.456715	-1.13063	down
pme0170	C8H16N4O3	N-Acetyl-L-Arginine	Amino acids and derivatives	Amino acids and derivatives	155-84-0	A	16896	20507	15964	17789	41366	35259	31782	36135.7	1.42457	2.03135	1.02244	up
pme1228	C11H12N2O3	5-Hydroxy-L-tryptophan	Amino acids and derivatives	Amino acids and derivatives	56-69-9	A	9	9	9	9	20680	10555	12420	14551.7	1.47263	1616.85	10.659	up
mws0715	C13H16N2O4	Phenylacetyl-L-glutamine	Amino acids and derivatives	Amino acids and derivatives	28047-15-6	B	13894	7843.1	7287.2	9674.77	35588	15404	12171	21054.3	1.02398	2.17621	1.12182	up
mws2213	C9H8O2	Cinnamic acid	Phenolic acids	Phenolic acids	140-10-3	A	6443	3642.1	7247	5777.37	15771	34584	32192	27515.7	1.3325	4.76267	2.25177	up
mws0009	C10H10O3	Coniferaldehyde	Phenolic acids	Phenolic acids	20649-42-7	B	52775	66320	72851	63982	99813	187610	145930	144451	1.28974	2.25768	1.17484	up
Lmhn002629	C11H10O7	Benzoyltartaric acid	Phenolic acids	Phenolic acids	-	B	9	9	9	9	1162200	921700	765490	949797	1.4729	105533	16.6873	up
mws1297	C13H18O6	Benzyl glucoside	Phenolic acids	Phenolic acids	4304-12-5	A	7603.7	6621.1	9555	7926.6	52692	86708	90168	76522.7	1.43909	9.65391	3.27111	up
Lmhn001477	C13H12O9	2-Caffeoyl-L-tartaric acid (Caftaric acid)	Phenolic acids	Phenolic acids	67879-58-7	A	9	9	9	9	79789	58994	72481	70421.3	1.47247	7824.59	12.9338	up
Lmmn002179	C14H18O8	Methyl salicylate-2-O-glucoside	Phenolic acids	Phenolic acids	10019-60-0	B	39987	52622	48385	46998	88260	94726	99523	94169.7	1.42871	2.0037	1.00266	up
Lmhn002140	C14H14O9	Feruloyltartaric acid (Fertaric acid)	Phenolic acids	Phenolic acids	-	B	9	9	9	9	4660700	2764100	2634400	3.35307e+06	1.47307	372563	18.5071	up
pmn001517	C15H22O8	3,4,5-Trimethoxyphenyl-1-O-Glucoside	Phenolic acids	Phenolic acids	-	B	3469100	2379800	2494600	2.78117e+06	8710700	9064200	6291100	8022000	1.40618	2.8844	1.52827	up
pmb3107	C15H20O10	Glucosyringic Acid	Phenolic acids	Phenolic acids	-	B	25958	49528	35413	36966.3	44077	96691	137440	92736	1.07048	2.50866	1.32692	up
pma3724	C17H20O9	1-O-Feruloylquinic acid	Phenolic acids	Phenolic acids	-	B	87917	64612	91646	81391.7	196760	197180	95959	163300	1.16069	2.00634	1.00457	up
pmb0752	C17H20O9	3-O-Feruloylquinic acid	Phenolic acids	Phenolic acids	1899-29-2	B	62625	88003	78115	76247.7	316590	280160	113730	236827	1.2642	3.10602	1.63507	up
Lmbp002309	C17H22O9	Sinapaldehyde-4-O-Glucoside	Phenolic acids	Phenolic acids	154461-65-1	B	19830	13561	6445.5	13278.8	73176	536500	385590	331755	1.31569	24.9838	4.64292	up
pmn001695	C16H20O10	Trihydroxycinnamoylquinic acid	Phenolic acids	Phenolic acids	-	B	44838	42162	33975	40325	224190	206940	172860	201330	1.46167	4.99268	2.31982	up
mws0011	C17H24O9	Syringin	Phenolic acids	Phenolic acids	118-34-3	B	39764	29988	12950	27567.3	572180	1009800	549230	710403	1.43033	25.7698	4.68761	up
Zmhn002227	C17H22O10	4-O-Glucosyl-sinapate	Phenolic acids	Phenolic acids	-	B	5372.6	11401	3562.7	6778.77	25065	16832	18826	20241	1.28016	2.98594	1.57819	up
pmb2654	C19H27NO12	Anthranilate-1-O-Sophoroside	Phenolic acids	Phenolic acids	-	B	50562	101730	79732	77341.3	312490	156680	174700	214623	1.29957	2.77501	1.4725	up
pme2459	C21H20O11	Luteolin-7-O-glucoside (Cynaroside)	Flavonoids	Flavonoid	5373-11-5	A	165020	195660	163810	174830	2672200	1186400	374480	1.41103e+06	1.27094	8.07085	3.01272	up
mws0057	C21H22O11	Eriodictyol-7-O-glucoside	Flavonoids	Dihydroflavone	38965-51-4	B	5849	3157	6190.5	5065.5	44423	33295	18893	32203.7	1.39101	6.35745	2.66845	up
Lmmp003767	C21H18O12	Kaempferol-7-O-glucuronide	Flavonoids	Flavonols	-	B	407370	431510	736080	524987	14959000	12948000	10739000	12882000	1.46261	24.5378	4.61693	up
mws1329	C21H20O12	Quercetin-7-O-glucoside*	Flavonoids	Flavonols	491-50-9	A	404890	522730	367450	431690	1697700	726790	656380	1.02696e+06	1.17768	2.37892	1.25031	up
mws0091	C21H20O12	Quercetin-3-O-glucoside (Isoquercitrin)*	Flavonoids	Flavonols	482-35-9	A	787620	909670	647090	781460	3077700	1189600	1273900	1.84707e+06	1.165	2.36361	1.24099	up
mws0061	C21H20O12	Quercetin-3-O-galactoside (Hyperin)	Flavonoids	Flavonols	482-36-0	A	914220	1417200	987530	1.10632e+06	4843700	1841500	1941000	2875400	1.19426	2.59908	1.378	up
pme1598	C22H24O11	Hesperetin-5-O-glucoside	Flavonoids	Dihydroflavonol	69651-80-5	B	616920	870620	623480	703673	2741000	1382900	764750	1629550	1.04701	2.31578	1.2115	up
Lmmp003783	C21H18O13	Quercetin-3-O-glucuronide	Flavonoids	Flavonols	22688-79-5	B	9	9	9	9	4756500	4697400	3512000	4.32197e+06	1.47252	480219	18.8733	up
Zmxp005470	C26H26O15	Tricin-7-O-(6''-O-malonyl)glucoside	Flavonoids	Flavonoid	-	B	9	9	9	9	30219	18939	40047	29735	1.46978	3303.89	11.6899	up
HJAP148	C26H28O15	Kaempferol-3-O-sambubioside	Flavonoids	Flavonoid	27661-51-4	A	734430	921880	965810	874040	2856000	2148100	3888100	2.96407e+06	1.40218	3.39123	1.76181	up
Lmsp004670	C27H30O15	Kaempferol-3-O-glucoside-7-O-rhamnoside	Flavonoids	Flavonols	-	A	317260	461780	539190	439410	1109400	872920	1527200	1169840	1.33693	2.6623	1.41267	up
pmp001079	C27H30O15	Luteolin-7-O-neohesperidoside (Lonicerin)*	Flavonoids	Flavonoid	25694-72-8	A	9193.2	14448	3775.7	9138.97	91677	37728	23096	50833.7	1.25107	5.5623	2.47568	up
pmp000593	C27H30O15	Luteolin-7-O-rutinoside*	Flavonoids	Flavonoid	3563-98-2	A	81157	95822	112230	96403	1127000	590300	345820	687707	1.39504	7.13366	2.83464	up
Lmjp002867	C27H30O15	Kaempferol-3-O-neohesperidoside*	Flavonoids	Flavonols	32602-81-6	A	320770	486920	555020	454237	1214700	873290	1701700	1263230	1.31792	2.781	1.4756	up
Lmsn002815	C27H30O15	Kaempferol-3-O-rutinoside(Nicotiflorin)*	Flavonoids	Flavonoid	17650-84-9	A	496360	739770	972130	736087	1419100	1440300	3902500	2.25397e+06	1.16415	3.06209	1.61452	up
Zmcp003989	C27H30O15	Kaempferol-3-O-rhamnosyl(1→2)glucoside	Flavonoids	Flavonoid	-	A	8299.6	6830.3	1016.9	5382.27	86174	50820	39328	58774	1.30864	10.9199	3.44889	up
Lmbp002336	C27H30O16	Quercetin-3-O-(2''-O-rhamnosyl)galactoside	Flavonoids	Flavonols	-	B	3291700	4704700	4336900	4111100	8716800	9624600	9991800	9444400	1.42148	2.29729	1.19993	up
pmp000596	C27H30O17	Quercetin-3-O-(2''-O-galactosyl)glucoside	Flavonoids	Flavonols	56782-99-1	A	9	9	9	9	23613	29449	23334	25465.3	1.47156	2829.48	11.4663	up
Lmsp003729	C27H30O17	Myricetin-3-O-rutinoside	Flavonoids	Flavonols	-	B	76104	148110	113890	112701	208030	233110	389080	276740	1.25226	2.45552	1.29603	up
Xmyp004678	C32H38O19	Kaempferol-3-O-(2-O-Xylosyl-6-O-Rhamnosyl)Glucoside	Flavonoids	Flavonoid	-	A	13974	13058	9034.8	12022.3	132130	104560	60252	98980.7	1.43488	8.23311	3.04144	up
Zmlp003063	C33H40O19	Luteolin-7-O-(2''-O-rhamnosyl)rutinoside	Flavonoids	Flavonoid	-	B	8855.4	7764	10409	9009.47	104550	71224	43086	72953.3	1.43381	8.09741	3.01746	up
Lmsp003881	C33H40O19	Kaempferol-3-O-rutinoside-7-O-rhamnoside	Flavonoids	Flavonols	-	A	298620	245850	243490	262653	3116600	2554300	2068500	2579800	1.4657	9.82207	3.29603	up
Hmqp002870	C32H38O20	Luteolin-7-O-Sophoroside-5-O-arabinoside	Flavonoids	Flavonoid	-	B	5590	11626	10916	9377.33	172370	138150	73848	128123	1.43611	13.663	3.7722	up
Lmyp003857	C35H28O19	Kaempferol-3-O-(2'',6''-digalloyl)glucoside	Flavonoids	Flavonoid	-	B	9325.2	13907	15691	12974.4	360120	361510	319440	347023	1.46786	26.7468	4.74129	up
Lnrp102163	C33H40O20	Quercetin-3-O-rutinoside-7-O-rhamnoside	Flavonoids	Flavonols	-	A	25632	11608	8902.5	15380.8	36564	38499	31632	35565	1.20491	2.31229	1.20932	up
HJAP127	C33H40O20	Quercetin-3-O-(2''-O-Rhamnosyl)rutinoside	Flavonoids	Flavonols	55696-57-6	A	5382000	8708400	7869800	7.32007e+06	18992000	20721000	16026000	1.85797e+07	1.40156	2.53818	1.3438	up
Hmcp001329	C32H38O21	Quercetin-3-O-xylosyl(1→2)glucosyl(1→2)glucoside	Flavonoids	Flavonols	-	A	10900	20507	16947	16118	69218	121410	128180	106269	1.409	6.59321	2.72098	up
Lmyp003588	C35H28O20	Quercetin-3-O-(2'',6''-digalloyl)-glucoside	Flavonoids	Flavonols	-	B	26721	28190	36707	30539.3	654300	679840	604060	646067	1.46932	21.1552	4.40294	up
HJAP023	C33H40O21	Kaempferol-6,8-di-C-glucoside-7-O-glucoside	Flavonoids	Flavonoid	-	B	20349	16252	14880	17160.3	28264	33360	51881	37835	1.27602	2.20479	1.14064	up
pmb0676	C38H40O19	Chrysoeriol-8-C-glucoside-7-O-(6''-feruloyl)glucoside	Flavonoids	Flavonoid carbonoside	-	B	4702.7	6503.1	8269.3	6491.7	143700	93705	109830	115745	1.46306	17.8297	4.15621	up
HJAP123	C40H52O25	Isorhamnetin-3-O-rutinoside-7-O-rutinoside	Flavonoids	Flavonoid	-	A	9083.2	20220	10548	13283.7	56248	89822	77793	74621	1.40341	5.61747	2.48992	up
mws4173	C11H10O4	5,7-Dimethoxycoumarin (Limettin)(Citropten)	Lignans and Coumarins	Coumarins	487-06-9	B	9	9	9	9	251740	316390	178720	248950	1.47189	27661.1	14.7556	up
mws1014	C10H8O5	Fraxetin (7,8-Dihydroxy-6-methoxycoumarin)	Lignans and Coumarins	Coumarins	574-84-5	B	179290	140300	134740	151443	578930	552520	178870	436773	1.14939	2.88407	1.52811	up
pmb0382	C19H14O6	O-Feruloyl 4-hydroxycoumarin	Lignans and Coumarins	Coumarins	-	B	9	39462	45483	28318	648200	758250	617760	674737	1.05323	23.8271	4.57453	up
Lmgp003270	C16H16O10	Scopoletin-7-O-glucuronide	Lignans and Coumarins	Coumarins	132752-65-9	B	52796	42740	44711	46749	144150	107590	46467	99402.3	1.04203	2.1263	1.08834	up
pmb0764	C6H9NOS	4-Methyl-5-thiazoleethanol	Others	Others	137-00-8	B	1943.3	3420.2	4375.2	3246.23	5622	10578	4681.1	6960.37	1.09194	2.14414	1.1004	up
pme1261	C9H19NO4	D-Panthenol	Others	Saccharides and Alcohols	81-13-0	B	17971	6989.4	10753	11904.5	23540	56027	249990	109852	1.10829	9.22782	3.20599	up
Hmyp002656	C11H11NO4	Methyl dioxindole-3-acetate	Others	Others	57061-18-4	A	9228.2	5297.1	4618.2	6381.17	21841	16561	9387.4	15929.8	1.20651	2.49638	1.31984	up
mws1080	C12H22O11	Galactinol	Others	Saccharides and Alcohols	3687-64-7	A	406000	548720	653240	535987	2051400	1687900	1419300	1.71953e+06	1.42368	3.20816	1.68175	up
Lmsn000381	C12H22O11	D-Maltose*	Others	Saccharides and Alcohols	133-99-3	A	223400	507550	244020	324990	1538900	1003100	845450	1129150	1.34578	3.47441	1.79677	up
mws5038	C12H22O11	Isomaltulose*	Others	Saccharides and Alcohols	13718-94-0	A	255490	743660	425080	474743	1486000	1135300	1025800	1215700	1.26458	2.56075	1.35657	up
mws0264	C12H22O11	D-Trehalose*	Others	Saccharides and Alcohols	99-20-7	A	165000	279740	305270	250003	799300	426500	453160	559653	1.23939	2.23858	1.16259	up
pme0519	C12H22O11	D-Sucrose*	Others	Saccharides and Alcohols	57-50-1	A	182650	244490	262910	230017	895510	835780	808190	846493	1.45595	3.68014	1.87976	up
pmb0801	C14H19NO9	4-Pyridoxic acid-O-glucoside	Others	Vitamin	-	A	26244	25465	39220	30309.7	69396	64937	77846	70726.3	1.38812	2.33346	1.22247	up
mws5040	C12H21O11Na	Turanose	Others	Saccharides and Alcohols	547-25-1	B	131310	330720	195980	219337	603550	609790	547740	587027	1.32658	2.67637	1.42028	up
mws0146	C7H7NO2	Nicotinic Acid Methyl Ester(Methyl Nicotinate)	Alkaloids	Alkaloids	93-60-7	B	28030	50608	30533	36390.3	88681	88258	50946	75961.7	1.23075	2.08741	1.06172	up
pme1137	C6H5NO3	6-Hydroxynicotinic acid	Alkaloids	Alkaloids	5006-66-6	B	20753	25761	38807	28440.3	132180	83059	42942	86060.3	1.22296	3.026	1.59741	up
Hmtp000776	C8H9NO3	4,5,6-Trihydroxy-2-cyclohexen-1-ylideneacetonitrile	Alkaloids	Alkaloids	-	B	195140	196600	239480	210407	640430	434830	239430	438230	1.13167	2.08278	1.05851	up
Lmsn009589	C30H48O6	2α,3β,19α,23-Tetrahydroxyurs-12-en-28-oic acid	Terpenoids	Triterpene	-	B	9	9	9	9	3662.4	1979.9	1258.9	2300.4	1.46874	255.6	7.99774	up
Lmsn006130	C36H56O12	2α,3β,19α-Trihydroxyurs-12-en-23,28-dioic acid-28-O-glucoside	Terpenoids	Triterpene	-	A	10729	8946.6	14029	11234.9	19495	29105	29544	26048	1.32265	2.3185	1.21319	up
mws0972	C6H12O3	6-Hydroxyhexanoic acid	Organic acids	Organic acids	1191-25-9	A	258380	258080	309670	275377	581400	863240	684130	709590	1.40956	2.5768	1.36558	up
Wmzn000227	C6H10O4	2,2-Dimethylsuccinic acid	Organic acids	Organic acids	597-43-3	A	30069	17149	22461	23226.3	81279	65450	52155	66294.7	1.37434	2.85429	1.51313	up
pme3154	C6H12O4	Mevalonic acid	Organic acids	Organic acids	150-97-0	B	163780	144700	306880	205120	386770	964220	1011800	787597	1.24198	3.83969	1.94099	up
Zmjn001813	C7H12O4	Pimelic acid*	Organic acids	Organic acids	111-16-0	B	17555	17102	13911	16189.3	132640	48714	49176	76843.3	1.35395	4.74654	2.24688	up
Zmtn001464	C10H7NO4	4,8-Dihydroxyquinoline-2-carboxylic acid	Organic acids	Organic acids	59-00-7	B	9	3539.9	1797.9	1782.27	27644	12213	11616	17157.7	1.05075	9.62688	3.26707	up
mws5045	C12H24O3	12-Hydroxydodecanoic acid	Lipids	Free fatty acids	505-95-3	A	1687.8	1043	1146	1292.27	5147.3	6544.7	6778	6156.67	1.42775	4.76424	2.25225	up
YC512118	C18H35NO	Oleamide (9-Octadecenamide)	Lipids	Free fatty acids	301-02-0	A	13141	7909.4	6354.9	9135.1	23827	18939	72796	38520.7	1.17488	4.21678	2.07614	up
