# Supplementary material for: Elucidating the Differentiation Synthesis Mechanisms of Differently Colored Resistance Quinoa Seedings Using Metabolite Profiling and Transcriptome Analysis
Source: Metabolites. 2023 Oct 10;13(10):1065. doi: 10.3390/metabo13101065 (PMC10609267; doi:10.3390/metabo13101065)
Supplement: Supplementary file 1 [file metabolites-13-01065-s001.zip › Table S10.xlsx]

## Sheet: Sheet1
Table S10 Significantly different metabolites in R-RvsR-B
Index	Formula	Compounds	Class I	Class II	CAS	Level	R-R1	R-R2	R-R3	R-R average	R-B1	R-B2	R-B3	R-B average	VIP	Fold_Change	Log2FC	Type
pme3017	C4H9NO2	2-Aminoisobutyric acid	Amino acids and derivatives	Amino acids and derivatives	62-57-7	B	3700300	1767500	3457100	2.97497e+06	1720400	690670	570290	993787	1.17984	0.33405	-1.58187	down
pme0193	C5H10N2O3	L-Glutamine	Amino acids and derivatives	Amino acids and derivatives	56-85-9	A	4956400	3063200	3894100	3.97123e+06	2056200	2079700	1605400	1.91377e+06	1.31901	0.481907	-1.05317	down
pme0026	C6H14N2O2	L-Lysine	Amino acids and derivatives	Amino acids and derivatives	56-87-1	B	5291600	3239400	4069400	4.20013e+06	2147900	2023400	1642600	1.93797e+06	1.33108	0.461406	-1.11589	down
pme2758	C5H9NO5	4-Hydroxy-L-glutamic acid	Amino acids and derivatives	Amino acids and derivatives	3913-68-6	A	103430	51270	58059	70919.7	22223	47700	21110	30344.3	1.13815	0.427869	-1.22476	down
Lmbp000123	C6H13NO2S	L-Homomethionine	Amino acids and derivatives	Amino acids and derivatives	25148-30-5	B	681820	312540	621920	538760	20514	77809	78354	58892.3	1.33198	0.109311	-3.19349	down
pmb0468	C6H11NO3S	N-Formyl-L-Methionine	Amino acids and derivatives	Amino acids and derivatives	4289-98-9	B	208770	159780	114540	161030	11979	17875	15185	15013	1.42525	0.0932311	-3.42305	down
Lmrj001698	C9H18N2O4	L-Seryl-L-Isoleucine	Amino acids and derivatives	Amino acids and derivatives	91086-51-0	A	2573300	371100	872130	1.27218e+06	111770	79194	52642	81202	1.30919	0.0638292	-3.96964	down
mws5042	C11H14N2O3	L-Glycyl-L-phenylalanine	Amino acids and derivatives	Amino acids and derivatives	721-66-4	B	700480	159170	295350	385000	159850	132130	125750	139243	1.0195	0.361671	-1.46725	down
Lmhp001670	C11H22N2O3	L-Valyl-L-Leucine	Amino acids and derivatives	Amino acids and derivatives	3989-97-7	B	2721200	436330	1149000	1435510	184510	135920	138000	152810	1.28357	0.10645	-3.23175	down
mws4176	C12H16N2O3	L-Alanyl-L-Phenylalanine	Amino acids and derivatives	Amino acids and derivatives	3061-90-3	B	237740	34866	110550	127719	18609	14108	8707	13808	1.24609	0.108113	-3.20939	down
Lmhp002031	C12H24N2O3	L-Leucyl-L-Leucine	Amino acids and derivatives	Amino acids and derivatives	3303-31-9	B	1242600	246820	668020	719147	105570	117500	97374	106815	1.27527	0.14853	-2.75118	down
Lmhp002001	C14H20N2O3	L-Valyl-L-Phenylalanine	Amino acids and derivatives	Amino acids and derivatives	3918-92-1	B	362700	90740	233270	228903	52632	60922	45324	52959.3	1.23196	0.231361	-2.11178	down
pme2890	C8H16N2O4S2	L-Homocystine	Amino acids and derivatives	Amino acids and derivatives	626-72-2	B	33534	4007.1	16102	17881	3472.7	3313.7	4596.6	3794.33	1.03352	0.212199	-2.23651	down
mws5035	C15H22N2O3	L-Leucyl-L-phenylalanine	Amino acids and derivatives	Amino acids and derivatives	56217-82-4	B	491550	92364	164150	249355	59438	39152	47683	48757.7	1.1891	0.195535	-2.3545	down
mws0636	C18H20N2O3	L-Phenylalanyl-L-phenylalanine	Amino acids and derivatives	Amino acids and derivatives	2577-40-4	A	55708	15768	50554	40676.7	12060	8418	6322.5	8933.5	1.22755	0.219622	-2.1869	down
Lmbn001930	C7H6O2	2-Hydroxybenzaldehyde (Salicylaldehyde)	Phenolic acids	Phenolic acids	90-02-8	B	51779	36896	53394	47356.3	24293	32505	12698	23165.3	1.12495	0.489171	-1.03159	down
Zmyn002919	C8H8O2	2-Methylbenzoic acid	Phenolic acids	Phenolic acids	118-90-1	B	9002.9	11604	14551	11719.3	1425.7	2914.9	2585.5	2308.7	1.37698	0.197	-2.34373	down
Hmgn001653	C7H6O3	Protocatechualdehyde*	Phenolic acids	Phenolic acids	139-85-5	B	3247000	1120500	2022100	2.12987e+06	220500	340290	184220	248337	1.37042	0.116597	-3.10039	down
mws0749	C7H6O3	4-Hydroxybenzoic acid	Phenolic acids	Phenolic acids	99-96-7	B	3418100	1110600	2006900	2.17853e+06	188580	369970	234240	264263	1.36035	0.121303	-3.04331	down
Lmbn001981	C7H6O3	2,5-Dihydroxybenzaldehyde*	Phenolic acids	Phenolic acids	1194-98-5	B	3295400	1107200	2042400	2.14833e+06	132760	313460	210040	218753	1.36709	0.101825	-3.29584	down
pme3083	C8H7NO3	2-(Formylamino)benzoic acid	Phenolic acids	Phenolic acids	3342-77-6	B	433540	135830	268620	279330	121410	86340	96656	101469	1.16239	0.363257	-1.46094	down
pme0281	C8H6O4	Terephthalic acid	Phenolic acids	Phenolic acids	100-21-0	A	1052000	948110	1170800	1056970	338810	429710	117260	295260	1.23822	0.279346	-1.83988	down
pme3381	C9H10O3	3-Hydroxyphenylacetic Acid Methyl Ester	Phenolic acids	Phenolic acids	42058-59-3	B	10563	15952	19285	15266.7	5228.9	4257.1	11126	6870.67	1.14235	0.450044	-1.15186	down
mws0028	C8H8O4	Vanillic acid	Phenolic acids	Phenolic acids	121-34-6	B	430370	161550	261630	284517	10887	26231	18950	18689.3	1.39617	0.065688	-3.92823	down
Hmbp001276	C8H8O4	Gallacetophenone	Phenolic acids	Phenolic acids	528-21-2	B	202770	258090	258760	239873	12513	27598	11335	17148.7	1.40663	0.0714905	-3.8061	down
pme2598	C8H8O4	3,4-Dihydroxybenzeneacetic acid	Phenolic acids	Phenolic acids	102-32-9	B	157300	34407	67755	86487.3	44769	19517	22611	28965.7	1.01466	0.334912	-1.57814	down
pmb2795	C10H10O3	4-Methoxycinnamic acid*	Phenolic acids	Phenolic acids	830-09-1	A	263710	379090	272000	304933	162980	180760	96405	146715	1.21778	0.481138	-1.05548	down
mws1195	C10H10O3	p-Coumaric acid methyl ester*	Phenolic acids	Phenolic acids	3943-97-3	A	375080	563560	408650	449097	197190	214700	112490	174793	1.27901	0.389211	-1.36138	down
mws2212	C9H8O4	Caffeic acid	Phenolic acids	Phenolic acids	331-39-5	A	3181200	861590	2263400	2.10206e+06	488900	401830	410920	433883	1.27931	0.206408	-2.27643	down
Xmgn006542	C10H10O4	Dimethyl Phthalate	Phenolic acids	Phenolic acids	131-11-3	B	80179	107770	101380	96443	37917	31310	24238	31155	1.38339	0.323041	-1.63021	down
mws0014	C10H10O4	Ferulic acid	Phenolic acids	Phenolic acids	537-98-4	A	21064000	5506400	12873000	13147800	4419000	2350600	2244300	3.00463e+06	1.22272	0.228527	-2.12956	down
mws0027	C9H10O5	Syringic acid	Phenolic acids	Phenolic acids	530-57-4	B	6898.4	4162.1	1488.2	4182.9	9	9	4484.3	1500.77	1.00352	0.358786	-1.4788	down
mws1212	C11H12O4	Methyl ferulate	Phenolic acids	Phenolic acids	2309-07-1	A	8954800	12695000	9944800	1.05315e+07	2799000	1183800	1977600	1986800	1.37926	0.188652	-2.4062	down
pmb2620	C11H12O4	3,4-Dimethoxycinnamic acid	Phenolic acids	Phenolic acids	14737-89-4	A	4325900	6172900	5048200	5.18233e+06	1403900	517820	1098800	1006840	1.35804	0.194283	-2.36377	down
Lmhn003240	C11H10O6	Benzoylmalic acid	Phenolic acids	Phenolic acids	22138-51-8	A	2173100	1689100	2176100	2.01277e+06	53632	158990	77186	96602.7	1.41303	0.047995	-4.38097	down
pmn001669	C12H14O5	Methyl sinapate	Phenolic acids	Phenolic acids	20733-94-2	A	9285.7	20745	8076.9	12702.5	3299.5	1600.8	2354.5	2418.27	1.31529	0.190377	-2.39307	down
Lmhn003373	C11H10O7	p-Hydroxybenzoylmalic acid	Phenolic acids	Phenolic acids	-	B	689170	396010	550790	545323	12438	56891	18604	29311	1.37901	0.0537498	-4.2176	down
pme3472	C12H16O7	Arbutin	Phenolic acids	Phenolic acids	497-76-7	B	76222	100240	94333	90265	26051	84458	19898	43469	1.01721	0.481571	-1.05418	down
pmb3142	C13H16O8	Salicylic acid-2-O-glucoside	Phenolic acids	Phenolic acids	10366-91-3	A	10306000	7892700	7857700	8.68547e+06	2515800	5386800	2645600	3.51607e+06	1.2636	0.404822	-1.30464	down
pmn001690	C16H24O7	3-Hydroxy-4-isopropylbenzylalcohol-3-O-glucoside	Phenolic acids	Phenolic acids	-	B	308340	210730	271680	263583	26697	23466	29140	26434.3	1.44092	0.100288	-3.31777	down
Lmmn003663	C14H18O9	5-Glucosyloxy-2-Hydroxybenzoic acid methyl ester	Phenolic acids	Phenolic acids	-	B	82981	54811	52246	63346	14838	11824	4918.6	10526.9	1.33895	0.16618	-2.58918	down
Zmhn001883	C14H18O9	Vanillic acid-4-O-glucoside	Phenolic acids	Phenolic acids	32142-31-7	B	54340	82784	65934	67686	2519.2	12072	2064.8	5552	1.32834	0.0820258	-3.60778	down
Zmhn002422	C16H20O9	1-O-Feruloyl-D-Glucose	Phenolic acids	Phenolic acids	-	A	27040000	25892000	23749000	2.55603e+07	13345000	6199900	13006000	10850300	1.27468	0.424498	-1.23617	down
Hmmn002544	C16H20O9	Ferulic acid-4-O-glucoside	Phenolic acids	Phenolic acids	117405-51-3	A	928760	1189800	1056000	1.05819e+06	85275	83404	156910	108530	1.42486	0.102562	-3.28543	down
Zmhn002334	C16H20O9	6-O-Feruloyl-D-glucose	Phenolic acids	Phenolic acids	137887-25-3	B	4406600	5492900	5283100	5.06087e+06	1400100	425170	836560	887277	1.35318	0.175321	-2.51193	down
pmb2940	C17H22O10	1-O-Glucosyl sinapate	Phenolic acids	Phenolic acids	78185-48-5	B	849110	1484500	1071800	1.13514e+06	360380	271890	289390	307220	1.38402	0.270646	-1.88552	down
pmb3072	C22H26O12	3-O-p-Coumaroylshikimic acid-O-glucoside	Phenolic acids	Phenolic acids	-	B	31397	52493	40082	41324	16307	18117	18575	17666.3	1.34827	0.427508	-1.22598	down
Hmbn002692	C22H30O14	6'-O-Feruloyl-D-sucrose	Phenolic acids	Phenolic acids	118230-77-6	B	690060	514070	568010	590713	280350	204800	363650	282933	1.31356	0.478969	-1.062	down
pmb0824	C25H28O13	Syringic acid-4-O-(6''-feruloyl)glucoside	Phenolic acids	Phenolic acids	-	B	157590	163950	171920	164487	39160	10231	20347	23246	1.35856	0.141325	-2.82292	down
pme3200	C2H7N3	1-methylguanidine	Nucleotides and derivatives	Nucleotides and derivatives	471-29-4	B	40113	27467	26454	31344.7	9	9	9	9	1.44576	0.00028713	-11.766	down
mws0255	C4H5N3O	Cytosine	Nucleotides and derivatives	Nucleotides and derivatives	71-30-7	B	10215000	4088000	4845300	6.38277e+06	645670	2018100	787670	1150480	1.28792	0.180248	-2.47195	down
pme0040	C5H5N5	Adenine	Nucleotides and derivatives	Nucleotides and derivatives	73-24-5	A	70529000	27141000	49927000	49199000	8318200	9646500	5941000	7.96857e+06	1.36472	0.161966	-2.62624	down
pme1109	C5H5N5O	Guanine	Nucleotides and derivatives	Nucleotides and derivatives	73-40-5	A	1895200	475940	1031000	1.13405e+06	82685	141760	124000	116148	1.35125	0.102419	-3.28744	down
pme3732	C9H13N3O5	Cytidine	Nucleotides and derivatives	Nucleotides and derivatives	65-46-3	B	1373500	407380	699770	826883	300100	358450	277980	312177	1.12036	0.377534	-1.40532	down
ML10180524	C9H13N3O5	Cytarabine	Nucleotides and derivatives	Nucleotides and derivatives	147-94-4	B	724260	212250	551610	496040	151450	247660	144390	181167	1.08496	0.365226	-1.45314	down
mws0248	C9H12N2O6	Uridine	Nucleotides and derivatives	Nucleotides and derivatives	58-96-8	A	1840000	302320	873320	1.00521e+06	313570	347080	121400	260683	1.00727	0.259331	-1.94713	down
Hmhp001812	C11H15N5O4	2'-O-Methyladenosine	Nucleotides and derivatives	Nucleotides and derivatives	2140-79-6	A	386510	58434	124840	189928	39254	52603	40637	44164.7	1.06368	0.232534	-2.10449	down
pme1178	C10H13N5O5	Guanosine	Nucleotides and derivatives	Nucleotides and derivatives	118-00-3	A	27458000	8689700	15399000	1.71822e+07	6989200	7708600	3033000	5.91027e+06	1.09568	0.343975	-1.53962	down
Lmqp000329	C8H14N3O7P	5-Aminoimidazole ribonucleotide	Nucleotides and derivatives	Nucleotides and derivatives	25635-88-5	A	210880	338530	236180	261863	75364	159300	35556	90073.3	1.13696	0.343971	-1.53964	down
pme3188	C9H13N2O9P	Uridine 5'-monophosphate	Nucleotides and derivatives	Nucleotides and derivatives	58-97-9	B	1457200	107470	392570	652413	25593	13918	40518	26676.3	1.26666	0.0408887	-4.61215	down
mws0675	C11H15N2O8P	β-Nicotinamide mononucleotide	Nucleotides and derivatives	Nucleotides and derivatives	1094-61-7	B	647470	234920	559410	480600	214550	124040	74499	137696	1.1832	0.286509	-1.80335	down
pmb0998	C10H14N5O8P	Guanosine 5'-monophosphate	Nucleotides and derivatives	Nucleotides and derivatives	85-32-5	A	533200	106960	373760	337973	60168	59868	84534	68190	1.19855	0.201761	-2.30928	down
pme0376	C15H12O5	Naringenin (5,7,4'-Trihydroxyflavanone)	Flavonoids	Dihydroflavone	480-41-1	A	48556	51882	57019	52485.7	18388	20735	13433	17518.7	1.39459	0.33378	-1.58303	down
mws1068	C15H10O6	Kaempferol (3,5,7,4'-Tetrahydroxyflavone)	Flavonoids	Flavonols	520-18-3	A	421150	329740	435890	395593	53857	117310	39156	70107.7	1.34863	0.177222	-2.49637	down
pme2954	C15H10O7	Quercetin	Flavonoids	Flavonols	117-39-5	A	896420	700820	811360	802867	155420	205590	149960	170323	1.42717	0.212144	-2.23688	down
mws0066	C16H12O7	Isorhamnetin	Flavonoids	Flavonols	480-19-3	A	2503700	1857300	2068800	2.14327e+06	81308	176130	51038	102825	1.40195	0.047976	-4.38154	down
Lmbp003668	C20H18O10	Kaempferol-3-O-arabinoside	Flavonoids	Flavonoid	-	B	2570200	1208600	1439700	1739500	34838	231450	23901	96729.7	1.31584	0.0556077	-4.16857	down
mws0919	C21H20O10	Kaempferol-3-O-rhamnoside (Afzelin)	Flavonoids	Flavonols	482-39-3	A	77962	39973	45821	54585.3	9	14293	2277.1	5526.37	1.0156	0.101243	-3.30411	down
pme0321	C21H20O10	Kaempferol-7-O-rhamnoside	Flavonoids	Flavonols	20196-89-8	B	22741	17810	16309	18953.3	2351.2	12535	2499.6	5795.27	1.14939	0.305765	-1.7095	down
mws2186	C20H18O11	Avicularin(Quercetin-3-O-α-L-arabinofuranoside)	Flavonoids	Flavonols	572-30-5	A	2845600	1712200	1764000	2.10727e+06	326780	666670	272340	421930	1.34551	0.200226	-2.3203	down
Lmdp003509	C20H18O11	Quercetin-3-O-xyloside (Reynoutrin)	Flavonoids	Flavonols	549-32-6	B	4106100	683850	2592100	2.46068e+06	419060	943140	416500	592900	1.05406	0.240949	-2.0532	down
HJN087	C21H22O10	Naringenin-4'-O-glucoside	Flavonoids	Flavonoid	-	B	100740	66039	73940	80239.7	26592	38437	22401	29143.3	1.34085	0.363204	-1.46115	down
Hmcp002316	C21H20O11	Isorhamnetin-3-O-arabinoside	Flavonoids	Flavonols	-	A	8535900	6706200	5327000	6.85637e+06	160740	912930	108090	393920	1.33024	0.0574532	-4.12147	down
mws2209	C21H20O11	Kaempferol-3-O-glucoside (Astragalin)	Flavonoids	Flavonols	480-10-4	B	4500500	3289500	4924000	4238000	838540	1912000	536930	1.09582e+06	1.26677	0.258571	-1.95137	down
mws0045	C21H20O11	Quercetin-3-O-rhamnoside(Quercitrin)	Flavonoids	Flavonols	522-12-3	B	383920	235480	303030	307477	41896	60604	29571	44023.7	1.39797	0.143177	-2.80413	down
Hmpp003270	C21H20O11	Luteolin-4'-O-glucoside	Flavonoids	Flavonoid	6920-38-3	A	6033700	5304400	5030700	5.45627e+06	889790	2204300	657530	1250540	1.30458	0.229193	-2.12536	down
Lmlp003531	C21H20O11	Luteolin-3'-O-glucoside	Flavonoids	Flavonoid	5154-41-6	A	7573800	5130000	5543200	6.08233e+06	744970	1873300	613250	1.07717e+06	1.33812	0.177099	-2.49737	down
Lmmn004625	C21H22O11	Dihydrokaempferol-7-O-glucoside	Flavonoids	Flavonols	-	B	16829	7608.8	7224.8	10554.2	9	9	9	9	1.4432	0.000852741	-10.1956	down
Hmcp002539	C22H22O11	Isorhamnetin-3-O-rhamnoside	Flavonoids	Flavonols	-	B	2863200	2458000	1866900	2.39603e+06	43338	157260	17147	72581.7	1.3606	0.0302924	-5.0449	down
Lmjp003044	C22H22O12	Isorhamnetin-3-O-Glucoside*	Flavonoids	Flavonols	5041-82-7	A	12148000	12687000	10450000	1.17617e+07	1548900	7953100	1102300	3.53477e+06	1.12902	0.300533	-1.73441	down
Hmcp002207	C22H22O12	Isorhamnetin-7-O-glucoside (Brassicin)*	Flavonoids	Flavonols	6743-96-0	A	11732000	12408000	9892200	1.13441e+07	1449400	8622200	1106000	3.72587e+06	1.09199	0.328442	-1.60629	down
HJAP135	C24H24O12	Pinocembrin-7-O-(6''-O-malonyl)glucoside	Flavonoids	Flavonoid	-	A	2765800	3019500	2938100	2907800	478060	2302900	634510	1138490	1.1069	0.39153	-1.35281	down
Li512111	C24H24O13	Isorhamnetin-3-O-(6''-acetylglucoside)	Flavonoids	Flavonols	-	B	55913	76793	64429	65711.7	9	30461	9	10159.7	1.07078	0.15461	-2.6933	down
pmp000587	C24H22O14	Luteolin-7-O-(6''-malonyl)glucoside	Flavonoids	Flavonoid	-	A	9	2258.5	2261.3	1509.6	9	9	9	9	1.0051	0.00596184	-7.39003	down
mws0047	C27H30O14	Apigenin-7-O-neohesperidoside (Rhoifolin)	Flavonoids	Flavonoid	17306-46-6	B	60804	49385	54581	54923.3	17405	45029	19214	27216	1.13435	0.495527	-1.01296	down
Lmnp002741	C27H30O14	Genkwanin-6-C-(2''-O-apiosyl)glucoside	Flavonoids	Flavonoid carbonoside	-	B	146400	175820	122470	148230	18935	24944	18109	20662.7	1.42667	0.139396	-2.84274	down
Hmjn004446	C30H26O13	Luteolin-7-O-(6''-caffeoyl)rhamnoside	Flavonoids	Flavonoid	-	B	500750	480690	465450	482297	43052	150390	73694	89045.3	1.33938	0.184628	-2.43731	down
pmp001080	C28H32O15	Diosmetin-7-O-Neohesperidoside (Neodiosmin)	Flavonoids	Flavonoid	38665-01-9	B	195470	158750	149520	167913	35565	69047	30785	45132.3	1.34408	0.268783	-1.89548	down
Hmlp002975	C28H30O17	Isorhamnetin-3-O-glucuronide-7-O-rhamnoside	Flavonoids	Flavonols	-	B	441220	362170	365020	389470	123760	300870	90901	171844	1.13187	0.441224	-1.18042	down
pmp001105	C33H40O20	Kaempferol-3-O-neohesperidoside-7-O-glucoside	Flavonoids	Flavonols	-	A	53668	70319	84472	69486.3	23542	13789	51384	29571.7	1.13338	0.425575	-1.23251	down
Hmcp001559	C33H40O20	Isorhamnetin-3-O-rutinoside-7-O-arabinoside	Flavonoids	Flavonols	-	B	36914	31891	25585	31463.3	1235.5	6478.6	2916.3	3543.47	1.33587	0.112622	-3.15044	down
Hmcp001589	C34H42O21	Isorhamnetin-3-O-rutinoside-4'-O-glucoside	Flavonoids	Flavonols	111393-97-6	B	137340	149950	153230	146840	3942.4	63337	18936	28738.5	1.1572	0.195713	-2.35319	down
Lmhp003162	C34H42O21	Chrysoeriol-6,8-di-C-glucoside-4'-O-glucoside	Flavonoids	Flavonoid	-	B	46111	47144	55699	49651.3	6678.5	9	9	2232.17	1.18562	0.0449568	-4.47532	down
Rfmb25702	C28H34O12	Pinoresinol-4-O-(6''-acetyl)glucoside	Lignans and Coumarins	Lignans	-	B	119570	147060	106580	124403	12264	47544	7926	22578	1.25375	0.18149	-2.46204	down
Rfmb26201	C30H38O14	Syringaresinol-4'-O-(6''-acetyl)glucoside	Lignans and Coumarins	Lignans	-	B	46774	84940	46635	59449.7	6616.5	17996	11102	11904.8	1.32306	0.200251	-2.32012	down
pmp000509	C6H6O3	Maltol	Others	Others	118-71-8	B	804920	702230	841980	783043	58213	67571	55135	60306.3	1.44218	0.0770153	-3.69871	down
pme0534	C6H12O7	Gluconic acid	Others	Saccharides and Alcohols	526-95-4	A	264040	167160	203170	211457	64319	157470	45775	89188	1.1213	0.421779	-1.24544	down
pma3101	C11H14NO6+	Nicotinate D-ribonucleoside	Others	Vitamin	17720-18-2	B	3042100	742170	1367700	1.71732e+06	415140	429740	432410	425763	1.21898	0.247923	-2.01204	down
Lmfp001509	C13H16O9	1-O-Galloyl-rhamnose	Tannins	Tannin	-	B	165560	122370	150970	146300	30082	20031	37213	29108.7	1.41269	0.198966	-2.32941	down
Lmsp005625	C22H18O13	3-O-Methylellagic acid-4'-O-(5''-O-acetyl)arabinoside	Tannins	Tannin	-	B	9421.3	4583.1	7060.4	7021.6	9	9	9	9	1.4445	0.00128176	-9.60766	down
pmb0484	C5H13NO	Choline	Alkaloids	Alkaloids	62-49-7	B	26383000	16152000	25387000	2.26407e+07	16618000	7203200	5506500	9775900	1.13124	0.431785	-1.21162	down
mws0005	C10H12N2	Tryptamine	Alkaloids	Plumerane	61-54-1	A	25655000	12550000	14506000	1.75703e+07	622890	1305300	769120	899103	1.41678	0.0511717	-4.28851	down
pme1651	C10H9NO2	Indole 3-acetic acid (IAA)	Alkaloids	Plumerane	87-51-4	B	33930	35386	33848	34388	18744	15868	8937	14516.3	1.28176	0.422134	-1.24423	down
pmb0774	C10H12N2O	N-Hydroxytryptamine*	Alkaloids	Phenolamine	-	A	6059900	5106600	3820900	4995800	237660	463180	400580	367140	1.42337	0.0734897	-3.76631	down
pme2024	C10H12N2O	Serotonin*	Alkaloids	Plumerane	50-67-9	A	7601800	6772800	5234000	6536200	255240	561950	490510	435900	1.42081	0.0666901	-3.90638	down
Lmlp003161	C14H20N2O3	N-Feruloylputrescine	Alkaloids	Phenolamine	501-13-3	B	22723	25301	11388	19804	11851	4400.5	7948.2	8066.57	1.11858	0.40732	-1.29577	down
pmp001252	C17H17NO3	p-Coumaroyltyramine	Alkaloids	Phenolamine	36417-86-4	B	3193.3	18476	8119.4	9929.57	9	9	8859.8	2959.27	1.01514	0.298026	-1.74649	down
mws0983	C20H39NO2	N-Oleoylethanolamine	Alkaloids	Alkaloids	111-58-0	B	273900	67372	97473	146248	28481	33859	26513	29617.7	1.24996	0.202516	-2.30389	down
pmb0776	C20H20N2O3	N-Feruloyltryptamine	Alkaloids	Phenolamine	53905-13-8	A	56322	47291	47998	50537	1379.6	2200.3	1038.1	1539.33	1.43109	0.0304595	-5.03696	down
HJAP050	C19H21NO5	N-Feruloyl-3-methoxytyramine	Alkaloids	Phenolamine	78510-19-7	A	97658	263840	142890	168129	9	129070	9	43029.3	1.01644	0.25593	-1.96618	down
Lmlp003024	C20H30O7N4	N'-p-Coumaroylagmatine-glucoside	Alkaloids	Phenolamine	-	B	45240	53168	55959	51455.7	10420	9	9	3479.33	1.15197	0.0676181	-3.88645	down
Lmhp005872	C25H30N2O6	Diferuloylcadaverine	Alkaloids	Phenolamine	-	B	42576	46026	34806	41136	2599.3	20350	5720.5	9556.6	1.19397	0.232317	-2.10583	down
pmb0492	C34H37N3O6	N',N'',N'''-p-Coumaroyl-cinnamoyl-caffeoyl spermidine	Alkaloids	Phenolamine	-	B	364580	102530	178570	215227	79690	98413	52834	76979	1.08821	0.357665	-1.48332	down
Lmsn012425	C30H48O4	Rubusic acid (3β,7α-Dihydroxyolean-12-en-28-oic acid)	Terpenoids	Triterpene	23984-26-1	A	37399	7100.7	15334	19944.6	1991.1	679.05	1190.7	1286.95	1.33515	0.0645263	-3.95397	down
Lmmn004145	C38H60O10	3-O-(2-O-Acetyl-glucosyl)oleanolic acid	Terpenoids	Triterpene	-	A	9064000	4368700	10024000	7818900	4118700	3912000	1448400	3159700	1.06045	0.404111	-1.30718	down
pmn001505	C41H64O13	Oleanolic acid-3-O-xylosyl(1→3)glucuronide	Terpenoids	Triterpene	-	A	137030	34713	97060	89601	35077	24608	8953.1	22879.4	1.09784	0.255347	-1.96947	down
pme3034	C5H8O4	Ethylmalonic acid	Organic acids	Organic acids	601-75-2	B	32451	22933	30183	28522.3	9496	13787	12086	11789.7	1.37213	0.413349	-1.27457	down
pme0243	C5H8O4	Glutaric acid	Organic acids	Organic acids	110-94-1	B	788680	520480	657540	655567	298340	374230	246360	306310	1.31762	0.467245	-1.09775	down
Lmmn000806	C5H8O4	Dimethylmalonic acid*	Organic acids	Organic acids	595-46-0	A	247070	153190	303940	234733	69350	110410	16411	65390.3	1.10734	0.278573	-1.84387	down
Lmbn001364	C5H8O4	4-Hydroxy-2-Oxopentanoic Acid*	Organic acids	Organic acids	3318-73-8	B	235720	162150	296620	231497	62776	102740	18490	61335.3	1.16254	0.264951	-1.9162	down
Lmbn001288	C5H8O4	2-Hydroxy-2-methyl-3-oxobutanoic acid*	Organic acids	Organic acids	71698-08-3	B	245470	164060	290430	233320	69738	97812	18544	62031.3	1.16359	0.265864	-1.91124	down
mws0473	C5H8O4	2-Methylsuccinic acid*	Organic acids	Organic acids	498-21-5	A	2716800	1822800	3148700	2.56277e+06	806890	1251000	225130	761007	1.13111	0.296947	-1.75172	down
Lmrn002746	C6H12O3	2-Hydroxy-4-methylpentanoic acid	Organic acids	Organic acids	498-36-2	A	89688	117230	135640	114186	46798	28340	47394	40844	1.34535	0.357697	-1.48319	down
mws0208	C6H10O4	Adipic Acid*	Organic acids	Organic acids	124-04-9	B	992240	664080	647270	767863	370050	437150	225650	344283	1.23752	0.448365	-1.15725	down
Lmbn001609	C6H10O4	2-Acetyl-2-Hydroxybutanoic Acid	Organic acids	Organic acids	-	B	135990	95359	85646	105665	59371	61833	33491	51565	1.19807	0.488005	-1.03503	down
Lmbn001676	C6H10O4	3-Hydroxy-3-Methyl-2-Oxopentanoic Acid	Organic acids	Organic acids	-	B	18676	14618	26550	19948	5296.5	12467	2836.7	6866.73	1.13539	0.344232	-1.53855	down
Lmbn000216	C5H8O5	3-Methylmalic acid	Organic acids	Organic acids	152204-30-3	A	42849	23045	31280	32391.3	10830	12140	20720	14563.3	1.22745	0.449606	-1.15327	down
pme0282	C8H6O4	Phthalic acid	Organic acids	Organic acids	88-99-3	A	157080	100670	171540	143097	69464	80714	49210	66462.7	1.24671	0.46446	-1.10637	down
Lmgn002555	C8H14O4	2-Propylglutaric acid	Organic acids	Organic acids	32806-62-5	A	374690	368580	487050	410107	199800	51609	150540	133983	1.20968	0.326703	-1.61395	down
mws0242	C8H14O4	Suberic Acid	Organic acids	Organic acids	505-48-6	B	157060	89181	84685	110309	44867	34302	31638	36935.7	1.33729	0.334839	-1.57846	down
Lmmn003323	C16H32O3	2-Hydroxyhexadecanoic acid	Organic acids	Organic acids	764-67-0	B	597640	182340	276630	352203	105840	115730	136230	119267	1.18264	0.33863	-1.56222	down
pmb2657	C10H18N4O6	Argininosuccinic acid	Organic acids	Organic acids	2387-71-5	B	264980	225630	227840	239483	101390	103530	120460	108460	1.42792	0.452892	-1.14276	down
mws0120	C8H20NO6P	Choline Alfoscerate	Lipids	PC	28319-77-9	B	85955	121870	108270	105365	46582	68423	25115	46706.7	1.16106	0.443284	-1.1737	down
Lmbn005923	C18H30O2	Crepenynic acid	Lipids	Free fatty acids	2277-31-8	A	459140	256350	364380	359957	211670	154990	163830	176830	1.26998	0.491254	-1.02546	down
mws0367	C18H30O2	α-Linolenic Acid*	Lipids	Free fatty acids	463-40-1	A	28308000	15863000	23776000	22649000	12367000	9510000	9177700	1.03516e+07	1.29382	0.457043	-1.1296	down
mws0366	C18H30O2	γ-Linolenic Acid*	Lipids	Free fatty acids	506-26-3	A	30900000	18204000	22934000	2.40127e+07	13738000	10072000	10290000	1.13667e+07	1.30208	0.473361	-1.07899	down
Lmbn006152	C18H32O2	(9Z,11E)-Octadecadienoic acid	Lipids	Free fatty acids	2540-56-9	B	35482	17552	28547	27193.7	15016	13073	10986	13025	1.22153	0.478972	-1.06199	down
Zmyn004548	C18H28O3	12-Oxo-phytodienoic acid	Lipids	Free fatty acids	85551-10-6	B	17283	4395	9573.9	10417.3	4301	1986.4	2679.9	2989.1	1.14903	0.286936	-1.8012	down
pmb2786	C18H30O3	9-Hydroxy-10,12,15-octadecatrienoic acid*	Lipids	Free fatty acids	89886-42-0	B	25601	9074.9	18699	17791.6	7995.5	6650.3	8035.1	7560.3	1.14151	0.424936	-1.23468	down
Lmbn005443	C18H30O3	13-KODE; (9Z,11E)-13-Oxooctadeca-9,11-dienoic acid*	Lipids	Free fatty acids	54739-30-9	B	25669	10951	17504	18041.3	9070.4	5687.4	8807	7854.93	1.18886	0.435385	-1.19964	down
Lmhp011562	C21H36O4	1-α-Linolenoyl-glycerol	Lipids	Glycerol ester	-	A	8559000	3461900	6817300	6279400	2286900	940710	1219100	1.48224e+06	1.2891	0.236047	-2.08285	down
Lmhp011388	C21H36O4	2-α-Linolenoyl-glycerol	Lipids	Glycerol ester	55268-58-1	A	4427800	1629000	3439900	3.16557e+06	978920	392400	501210	624177	1.30023	0.197177	-2.34244	down
Lmhp012042	C21H38O4	2-Linoleoylglycerol	Lipids	Glycerol ester	3443-82-1	A	770930	408700	584680	588103	204840	129370	121300	151837	1.36127	0.25818	-1.95355	down
Lmhp112042	C21H38O4	1-Linoleoylglycerol	Lipids	Glycerol ester	2277-28-3	A	854620	424300	579230	619383	212270	134650	135910	160943	1.35742	0.259844	-1.94428	down
pmb0296	C21H40O4	1-Oleoyl-Sn-Glycerol	Lipids	Glycerol ester	129784-87-8	A	504820	224030	452970	393940	188030	164630	95801	149487	1.18892	0.379466	-1.39796	down
pmd0152	C19H39O7P	LysoPA 16:0 (2n isomer)	Lipids	Glycerol ester	-	B	12927	9	8102.9	7012.97	9	9	9	9	1.03702	0.00128334	-9.60588	down
Lmhp008337	C19H40NO7P	LysoPE 14:0(2n isomer)	Lipids	LPE	-	B	32267	13159	21920	22448.7	9543.7	2923.6	3144.1	5203.8	1.24648	0.231809	-2.10899	down
pmb0864	C19H40NO7P	LysoPE 14:0	Lipids	LPE	-	B	153900	49416	89175	97497	40734	13343	10102	21393	1.20313	0.219422	-2.18822	down
Lmhp008440	C20H40NO7P	LysoPE 15:1	Lipids	LPE	-	A	7375.1	3975.4	5244.7	5531.73	1910.6	9	9	642.867	1.13573	0.116214	-3.10514	down
Lmhp008273	C20H40NO7P	LysoPE 15:1(2n isomer)	Lipids	LPE	-	B	2526.3	721.77	2042.6	1763.56	9	9	9	9	1.43315	0.00510332	-7.61435	down
Lmhp009187	C20H42NO7P	LysoPE 15:0	Lipids	LPE	-	A	85275	28327	46863	53488.3	19567	11683	8179.7	13143.2	1.24597	0.245721	-2.0249	down
Lmhp008885	C20H42NO7P	LysoPE 15:0(2n isomer)	Lipids	LPE	-	A	17351	7332.1	11009	11897.4	5008	2172	1664.7	2948.23	1.25589	0.247806	-2.01272	down
Lmhp007836	C21H38NO7P	LysoPE 16:3	Lipids	LPE	-	A	61512	39912	58377	53267	33180	14830	7627.5	18545.8	1.15567	0.348167	-1.52215	down
Lmhp009034	C21H42NO7P	LysoPE 16:1	Lipids	LPE	-	A	212310	92850	148120	151093	91117	73391	24138	62882	1.01919	0.41618	-1.26472	down
pmd0160	C21H44NO7P	LysoPE 16:0(2n isomer)	Lipids	LPE	-	A	3505600	1047700	1790400	2.11457e+06	924940	288270	297060	503423	1.18825	0.238074	-2.07052	down
pmb0876	C21H44NO7P	LysoPE 16:0	Lipids	LPE	53862-35-4	A	16050000	4390200	7858300	9.43283e+06	3833400	1268900	1263400	2121900	1.19042	0.224948	-2.15233	down
Lmhp009464	C22H44NO7P	LysoPE 17:1(2n isomer)	Lipids	LPE	-	A	43941	15266	23619	27608.7	11667	5341.7	4331.8	7113.5	1.22526	0.257655	-1.95649	down
Lmhp009769	C22H44NO7P	LysoPE 17:1	Lipids	LPE	-	A	47945	14824	26116	29628.3	13811	5006.4	4678.9	7832.1	1.17805	0.264345	-1.91951	down
pmd0130	C22H46NO7P	LysoPC 14:0	Lipids	LPC	20559-16-4	A	61124	35672	62456	53084	29488	16562	8081.2	18043.7	1.17256	0.339909	-1.55678	down
Lmhp008233	C23H40NO7P	LysoPE 18:4	Lipids	LPE	-	A	4835.5	3196.9	5840.6	4624.33	2976.4	1240.7	966.08	1727.73	1.17198	0.373616	-1.42037	down
Lmhp008589	C23H42NO7P	LysoPE 18:3(2n isomer)	Lipids	LPE	-	A	7425400	3322300	5570900	5.43953e+06	3428900	2714900	1005700	2.38317e+06	1.01793	0.43812	-1.1906	down
Lmhp008801	C23H42NO7P	LysoPE 18:3	Lipids	LPE	-	A	4297000	2136300	3382400	3271900	2318500	1232300	683050	1.41128e+06	1.07715	0.431334	-1.21312	down
pmb0874	C23H44NO7P	LysoPE 18:2(2n isomer)	Lipids	LPE	-	A	30136000	13909000	23153000	2.23993e+07	12314000	9429700	3150100	8.29793e+06	1.08121	0.370454	-1.43263	down
pmb0881	C23H44NO7P	LysoPE 18:2	Lipids	LPE	-	A	14127000	6364300	10698000	1.03964e+07	5814700	3138800	1545200	3.49957e+06	1.14436	0.336612	-1.57084	down
pmb2260	C23H46NO7P	LysoPC 15:1	Lipids	LPC	-	A	16793	10701	17762	15085.3	4422.7	3193.8	2149.6	3255.37	1.36633	0.215797	-2.21225	down
mws0289	C23H46NO7P	LysoPE 18:1	Lipids	LPE	89576-29-4	A	3305500	1050700	2073400	2143200	1343700	645730	644750	878060	1.04829	0.409696	-1.28738	down
pmb0856	C23H46NO7P	LysoPE 18:1(2n isomer)	Lipids	LPE	-	A	4719700	1315800	2932800	2.98943e+06	1620600	1027200	776810	1.14154e+06	1.04305	0.381857	-1.38889	down
pmb0883	C23H48NO7P	LysoPE 18:0	Lipids	LPE	69747-55-3	A	143080	30120	61795	78331.7	18207	8694.3	7038.2	11313.2	1.25429	0.144426	-2.79159	down
pmb2319	C23H48NO7P	LysoPC 15:0	Lipids	LPC	108273-89-8	A	119010	66030	100940	95326.7	46934	43338	29143	39805	1.27675	0.417564	-1.25993	down
pmb0880	C23H48NO7P	LysoPE 18:0(2n isomer)	Lipids	LPE	-	A	42076	13065	27875	27672	16506	8009.1	7614.3	10709.8	1.06569	0.387027	-1.3695	down
Lmhp009129	C23H48NO7P	LysoPC 15:0(2n isomer)	Lipids	LPC	-	A	40128	18087	33338	30517.7	10104	14396	7796.6	10765.5	1.2473	0.352764	-1.50322	down
Hmyn007168	C22H45O9P	LysoPG 16:0	Lipids	Glycerol ester	-	B	9466900	3899600	5776300	6.38093e+06	3268800	3008700	1779500	2.68567e+06	1.14865	0.420889	-1.24849	down
pmb0863	C24H46NO7P	LysoPC 16:2(2n isomer)	Lipids	LPC	-	A	59912	39258	69082	56084	35483	26309	11034	24275.3	1.09051	0.432839	-1.2081	down
Lmhp008833	C24H48NO7P	LysoPC 16:1(2n isomer)	Lipids	LPC	-	A	592720	296810	570540	486690	223980	295020	73285	197428	1.03304	0.405655	-1.30167	down
pmb0855	C24H50NO7P	LysoPC 16:0	Lipids	LPC	17364-16-8	A	28877000	14161000	23287000	2.21083e+07	10954000	7244000	6721400	8.30647e+06	1.27712	0.375717	-1.41228	down
pmd0132	C24H50NO7P	LysoPC 16:0(2n isomer)	Lipids	LPC	-	A	5636200	2519800	4412700	4.18957e+06	2004700	1185400	1080600	1.42357e+06	1.25843	0.339789	-1.55729	down
Lmhp010040	C25H46NO7P	LysoPE 20:3	Lipids	LPE	-	A	28262	10231	20161	19551.3	9047.9	3430.3	2673.9	5050.7	1.20125	0.25833	-1.95271	down
Lmhp009802	C25H46NO7P	LysoPE 20:3(2n isomer)	Lipids	LPE	-	A	30086	8535.2	20189	19603.4	10295	4445.9	2541.3	5760.73	1.09093	0.293864	-1.76678	down
Lmhp010514	C25H48NO7P	LysoPE 20:2(2n isomer)	Lipids	LPE	-	A	28310	10293	16349	18317.3	10075	3555.5	2382.5	5337.67	1.1424	0.2914	-1.77893	down
Lmhp008718	C25H48NO7P	LysoPC 17:2	Lipids	LPC	-	A	69809	27594	60204	52535.7	22672	21267	6269.3	16736.1	1.10073	0.318566	-1.65033	down
Lmhp010757	C25H48NO7P	LysoPE 20:2	Lipids	LPE	-	A	74464	18250	42091	44935	20163	4987.4	5804.2	10318.2	1.14343	0.229625	-2.12265	down
Lmhp010515	C25H52NO7P	LysoPC 17:0(2n isomer)	Lipids	LPC	-	A	42017	23264	35142	33474.3	10896	17716	8369.7	12327.2	1.26211	0.368259	-1.44121	down
pmb2406	C25H52NO7P	LysoPC 17:0	Lipids	LPC	50930-23-9	A	22643	21301	19214	21052.7	6263.4	10984	3784.3	7010.57	1.26717	0.333001	-1.5864	down
Hmqp006235	C26H46NO7P	LysoPC 18:4	Lipids	LPC	-	A	26945	13562	24537	21681.3	9439.5	12634	4238.6	8770.7	1.11038	0.404528	-1.30569	down
pmp001251	C26H50NO7P	LysoPC 18:2(2n isomer)	Lipids	LPC	-	A	3154300	1505700	2935800	2.53193e+06	1354900	1158600	392980	968827	1.07756	0.382643	-1.38593	down
pmp001273	C26H50NO7P	LysoPC 18:2	Lipids	LPC	-	A	1409100	876300	1382200	1.22253e+06	751490	542450	328270	540737	1.19177	0.442308	-1.17688	down
mws0126	C26H54NO7P	LysoPC 18:0	Lipids	LPC	19420-57-6	A	830230	321110	586550	579297	211780	159070	150460	173770	1.29142	0.299967	-1.73712	down
pmd0136	C26H54NO7P	LysoPC 18:0(2n isomer)	Lipids	LPC	-	A	151770	61631	114160	109187	47990	23168	29851	33669.7	1.25602	0.308367	-1.69728	down
Lmhp007840	C27H52NO7P	LysoPC 19:2	Lipids	LPC	-	A	44823	14032	29432	29429	9621.4	5294	2733.3	5882.9	1.23348	0.199901	-2.32264	down
Lmhp011549	C28H56NO7P	LysoPC 20:1	Lipids	LPC	-	A	55967	20263	37285	37838.3	20589	11996	13869	15484.7	1.14094	0.409232	-1.28901	down
Lmhp008744	C33H56O14	1-α-Linolenoyl-glycerol-2,3-di-O-glucoside	Lipids	Glycerol ester	-	A	206500	112820	200860	173393	101920	51284	33764	62322.7	1.18547	0.359429	-1.47622	down
Lmhp008513	C33H56O14	2-α-Linolenoyl-glycerol-1,3-di-O-glucoside	Lipids	Glycerol ester	-	A	316490	207920	356140	293517	102080	103070	69515	91555	1.35747	0.311924	-1.68073	down
Lmhp009190	C33H58O14	2-Linoleoylglycerol-1,3-di-O-glucoside	Lipids	Glycerol ester	-	A	26008	8628.5	17743	17459.8	7093.5	7255.4	2047.1	5465.33	1.0819	0.313023	-1.67566	down
Lmhp009384	C33H58O14	1-Linoleoylglycerol-2,3-di-O-glucoside	Lipids	Glycerol ester	-	A	13203	7520.5	10402	10375.2	6151.5	2865.7	3212	4076.4	1.2472	0.3929	-1.34777	down
pme1002	C8H11NO	L-Tyramine	Amino acids and derivatives	Amino acids and derivatives	51-67-2	A	2379100	1896700	1883500	2053100	4767400	5616600	4479800	4954600	1.40876	2.41323	1.27096	up
pme3827	C9H11NO4	3,4-Dihydroxy-L-phenylalanine (L-Dopa)	Amino acids and derivatives	Amino acids and derivatives	59-92-7	B	16387	26234	19993	20871.3	97550	259430	121290	159423	1.38012	7.63839	2.93327	up
mws0715	C13H16N2O4	Phenylacetyl-L-glutamine	Amino acids and derivatives	Amino acids and derivatives	28047-15-6	B	13894	7843.1	7287.2	9674.77	24391	20552	26204	23715.7	1.29889	2.45129	1.29354	up
pme1086	C10H17N3O6S	Glutathione reduced form	Amino acids and derivatives	Amino acids and derivatives	70-18-8	A	97226	66353	85456	83011.7	498440	612480	382750	497890	1.42021	5.99783	2.58444	up
mws2213	C9H8O2	Cinnamic acid	Phenolic acids	Phenolic acids	140-10-3	A	6443	3642.1	7247	5777.37	61754	50312	53884	55316.7	1.41637	9.57472	3.25923	up
mws0009	C10H10O3	Coniferaldehyde	Phenolic acids	Phenolic acids	20649-42-7	B	52775	66320	72851	63982	222170	137620	203960	187917	1.37147	2.93702	1.55436	up
Lmdn003756	C10H10O4	Methyl caffeate	Phenolic acids	Phenolic acids	3843-74-1	A	129220	91156	86142	102173	1831400	1789400	1190500	1.60377e+06	1.43355	15.6966	3.97238	up
pme3443	C11H12O4	Sinapinaldehyde	Phenolic acids	Phenolic acids	4206-58-0	B	11157	9313.6	9263.5	9911.37	23200	19886	22774	21953.3	1.4127	2.21497	1.14728	up
mws0853	C11H14O4	Sinapyl alcohol	Phenolic acids	Phenolic acids	537-33-7	B	9	2681.1	1550.5	1413.53	9980.8	9196.4	15260	11479.1	1.01924	8.12083	3.02163	up
Lmhn002629	C11H10O7	Benzoyltartaric acid	Phenolic acids	Phenolic acids	-	B	9	9	9	9	403020	740570	695590	613060	1.44465	68117.8	16.0557	up
mws1297	C13H18O6	Benzyl glucoside	Phenolic acids	Phenolic acids	4304-12-5	A	7603.7	6621.1	9555	7926.6	88000	73386	106790	89392	1.43098	11.2775	3.49537	up
Lmhn102068	C13H12O8	2-O-Caffeoylmalic acid	Phenolic acids	Phenolic acids	53755-04-7	B	5472.3	4893.3	5433.4	5266.33	20778	25131	34136	26681.7	1.4155	5.06646	2.34098	up
Zmhn001926	C13H16O8	1-O-Salicyl-D-glucose	Phenolic acids	Phenolic acids	60517-74-0	A	25315000	13157000	16059000	18177000	44886000	45779000	30565000	40410000	1.25445	2.22314	1.1526	up
Zmhn000892	C13H18O8	4-O-Glucosyl-3,4-dihydroxybenzyl alcohol	Phenolic acids	Phenolic acids	-	A	109530	169390	103920	127613	253740	297530	330490	293920	1.34289	2.30321	1.20364	up
Lmhn001477	C13H12O9	2-Caffeoyl-L-tartaric acid (Caftaric acid)	Phenolic acids	Phenolic acids	67879-58-7	A	9	9	9	9	471620	764040	601070	612243	1.4455	68027	16.0538	up
pmn001367	C13H16O9	Protocatechuic acid-4-O-glucoside*	Phenolic acids	Phenolic acids	-	A	254350	250300	271790	258813	442640	889000	292740	541460	1.02956	2.09209	1.06494	up
Hmtn001120	C14H20O8	5-(2-Hydroxyethyl)-2-O-glucosylphenol	Phenolic acids	Phenolic acids	-	A	257410	292060	255340	268270	799750	559210	895860	751607	1.38134	2.80168	1.48629	up
Lmhn002140	C14H14O9	Feruloyltartaric acid (Fertaric acid)	Phenolic acids	Phenolic acids	-	B	9	9	9	9	1888300	2544600	1774700	2069200	1.44602	229911	17.8107	up
pmn001517	C15H22O8	3,4,5-Trimethoxyphenyl-1-O-Glucoside	Phenolic acids	Phenolic acids	-	B	3469100	2379800	2494600	2.78117e+06	7722900	4369600	7339000	6.47717e+06	1.26596	2.32894	1.21967	up
Lmtn000940	C14H18O10	1-O-(3,4-Dihydroxy-5-methoxy-benzoyl)-glucoside	Phenolic acids	Phenolic acids	-	B	35947	49272	36500	40573	108370	109940	121150	113153	1.41714	2.78888	1.47969	up
pmb0752	C17H20O9	3-O-Feruloylquinic acid	Phenolic acids	Phenolic acids	1899-29-2	B	62625	88003	78115	76247.7	190280	143250	146390	159973	1.36692	2.09808	1.06907	up
Lmbp002309	C17H22O9	Sinapaldehyde-4-O-Glucoside	Phenolic acids	Phenolic acids	154461-65-1	B	19830	13561	6445.5	13278.8	160910	88045	149900	132952	1.37013	10.0123	3.3237	up
pmn001695	C16H20O10	Trihydroxycinnamoylquinic acid	Phenolic acids	Phenolic acids	-	B	44838	42162	33975	40325	171110	108660	169080	149617	1.39156	3.71027	1.89152	up
Zmhn002227	C17H22O10	4-O-Glucosyl-sinapate	Phenolic acids	Phenolic acids	-	B	5372.6	11401	3562.7	6778.77	18931	10522	20092	16515	1.11659	2.43628	1.28468	up
pmb2654	C19H27NO12	Anthranilate-1-O-Sophoroside	Phenolic acids	Phenolic acids	-	B	50562	101730	79732	77341.3	152810	195730	481090	276543	1.18718	3.57562	1.83819	up
pmb0374	C5H5N5	2-Aminopurine	Nucleotides and derivatives	Nucleotides and derivatives	452-06-2	A	50306	29486	75818	51870	145340	141020	94307	126889	1.21578	2.44629	1.29059	up
pme0033	C5H4N4O	Hypoxanthine	Nucleotides and derivatives	Nucleotides and derivatives	68-94-0	B	97997	124040	73575	98537.3	380170	375290	458260	404573	1.40799	4.10579	2.03766	up
mws1060	C10H12N4O5	9-(Arabinosyl)hypoxanthine	Nucleotides and derivatives	Nucleotides and derivatives	7013-16-3	A	118530	92488	93084	101367	270140	282670	103280	218697	1.04474	2.15747	1.10934	up
mws0884	C10H12N5O6P	Cyclic 3',5'-Adenylic acid	Nucleotides and derivatives	Nucleotides and derivatives	60-92-4	A	73663	38466	62889	58339.3	187400	183510	100610	157173	1.25862	2.69412	1.42982	up
Lmmn004912	C16H12O7	3-O-Methylquercetin	Flavonoids	Flavonols	1486-70-0	B	2381.7	5810.8	3369.5	3854	9059.6	5923.5	18029	11004	1.11042	2.85522	1.5136	up
pme2459	C21H20O11	Luteolin-7-O-glucoside (Cynaroside)	Flavonoids	Flavonoid	5373-11-5	A	165020	195660	163810	174830	1067100	4062800	1148700	2.09287e+06	1.35869	11.9709	3.58146	up
mws0057	C21H22O11	Eriodictyol-7-O-glucoside	Flavonoids	Dihydroflavone	38965-51-4	B	5849	3157	6190.5	5065.5	17962	79544	35861	44455.7	1.30681	8.77617	3.13359	up
Lmmp003767	C21H18O12	Kaempferol-7-O-glucuronide	Flavonoids	Flavonols	-	B	407370	431510	736080	524987	9989500	13857000	10204000	1.13502e+07	1.43407	21.6199	4.43429	up
Lmmp003783	C21H18O13	Quercetin-3-O-glucuronide	Flavonoids	Flavonols	22688-79-5	B	9	9	9	9	3355000	5389100	4274100	4339400	1.4456	482156	18.8791	up
Zmxp005470	C26H26O15	Tricin-7-O-(6''-O-malonyl)glucoside	Flavonoids	Flavonoid	-	B	9	9	9	9	7089.2	4198.4	20910	10732.5	1.42756	1192.5	10.2198	up
pmp001079	C27H30O15	Luteolin-7-O-neohesperidoside (Lonicerin)*	Flavonoids	Flavonoid	25694-72-8	A	9193.2	14448	3775.7	9138.97	53170	156040	48280	85830	1.30816	9.39165	3.23138	up
pmp000593	C27H30O15	Luteolin-7-O-rutinoside*	Flavonoids	Flavonoid	3563-98-2	A	81157	95822	112230	96403	647920	1807900	522660	992827	1.37014	10.2987	3.36439	up
Lmsn002815	C27H30O15	Kaempferol-3-O-rutinoside(Nicotiflorin)*	Flavonoids	Flavonoid	17650-84-9	A	496360	739770	972130	736087	1365500	2090200	2504400	1986700	1.27704	2.699	1.43243	up
Zmcp003989	C27H30O15	Kaempferol-3-O-rhamnosyl(1→2)glucoside	Flavonoids	Flavonoid	-	A	8299.6	6830.3	1016.9	5382.27	44181	67839	34199	48739.7	1.26301	9.0556	3.17881	up
Lmbp002336	C27H30O16	Quercetin-3-O-(2''-O-rhamnosyl)galactoside	Flavonoids	Flavonols	-	B	3291700	4704700	4336900	4111100	8316000	9330300	9045200	8.89717e+06	1.39538	2.16418	1.11382	up
Lmyn001269	C27H30O16	Kaempferol-3-O-sophoroside	Flavonoids	Flavonoid	19895-95-5	B	592550	396070	564030	517550	1157500	1102400	903600	1054500	1.33654	2.03748	1.02679	up
pmp000596	C27H30O17	Quercetin-3-O-(2''-O-galactosyl)glucoside	Flavonoids	Flavonols	56782-99-1	A	9	9	9	9	32368	9	36739	23038.7	1.00552	2559.85	11.3218	up
Lmsp003729	C27H30O17	Myricetin-3-O-rutinoside	Flavonoids	Flavonols	-	B	76104	148110	113890	112701	311020	273070	445350	343147	1.32823	3.04474	1.60632	up
Xmyp004678	C32H38O19	Kaempferol-3-O-(2-O-Xylosyl-6-O-Rhamnosyl)Glucoside	Flavonoids	Flavonoid	-	A	13974	13058	9034.8	12022.3	90046	134400	72358	98934.7	1.41734	8.22929	3.04077	up
Zmlp003063	C33H40O19	Luteolin-7-O-(2''-O-rhamnosyl)rutinoside	Flavonoids	Flavonoid	-	B	8855.4	7764	10409	9009.47	54617	83577	35151	57781.7	1.39546	6.41344	2.6811	up
Lmsp003881	C33H40O19	Kaempferol-3-O-rutinoside-7-O-rhamnoside	Flavonoids	Flavonols	-	A	298620	245850	243490	262653	1986500	3557000	1648700	2397400	1.41559	9.12762	3.19024	up
Hmqp002870	C32H38O20	Luteolin-7-O-Sophoroside-5-O-arabinoside	Flavonoids	Flavonoid	-	B	5590	11626	10916	9377.33	81406	161400	54767	99191	1.38128	10.5777	3.40296	up
Lmyp003857	C35H28O19	Kaempferol-3-O-(2'',6''-digalloyl)glucoside	Flavonoids	Flavonoid	-	B	9325.2	13907	15691	12974.4	254090	377010	286800	305967	1.43805	23.5823	4.55963	up
Lnrp102163	C33H40O20	Quercetin-3-O-rutinoside-7-O-rhamnoside	Flavonoids	Flavonols	-	A	25632	11608	8902.5	15380.8	42399	41044	28042	37161.7	1.1754	2.4161	1.27268	up
HJAP127	C33H40O20	Quercetin-3-O-(2''-O-Rhamnosyl)rutinoside	Flavonoids	Flavonols	55696-57-6	A	5382000	8708400	7869800	7.32007e+06	14230000	13578000	18546000	1.54513e+07	1.31282	2.11082	1.0778	up
Hmcp001329	C32H38O21	Quercetin-3-O-xylosyl(1→2)glucosyl(1→2)glucoside	Flavonoids	Flavonols	-	A	10900	20507	16947	16118	47457	72213	51247	56972.3	1.37304	3.5347	1.82159	up
Lmyp003588	C35H28O20	Quercetin-3-O-(2'',6''-digalloyl)-glucoside	Flavonoids	Flavonols	-	B	26721	28190	36707	30539.3	580320	589070	518250	562547	1.44339	18.4204	4.20323	up
pmb0676	C38H40O19	Chrysoeriol-8-C-glucoside-7-O-(6''-feruloyl)glucoside	Flavonoids	Flavonoid carbonoside	-	B	4702.7	6503.1	8269.3	6491.7	45635	37014	45818	42822.3	1.42247	6.59647	2.7217	up
HJAP123	C40H52O25	Isorhamnetin-3-O-rutinoside-7-O-rutinoside	Flavonoids	Flavonoid	-	A	9083.2	20220	10548	13283.7	35345	83954	38020	52439.7	1.28382	3.94766	1.981	up
mws4173	C11H10O4	5,7-Dimethoxycoumarin (Limettin)(Citropten)	Lignans and Coumarins	Coumarins	487-06-9	B	9	9	9	9	336350	14184	195490	182008	1.41084	20223.1	14.3037	up
mws1014	C10H8O5	Fraxetin (7,8-Dihydroxy-6-methoxycoumarin)	Lignans and Coumarins	Coumarins	574-84-5	B	179290	140300	134740	151443	499770	491670	564640	518693	1.42187	3.425	1.7761	up
pmb0382	C19H14O6	O-Feruloyl 4-hydroxycoumarin	Lignans and Coumarins	Coumarins	-	B	9	39462	45483	28318	828820	1147500	1129100	1035140	1.06996	36.5541	5.19196	up
pma0134	C4H8O4	D-(-)-Threose	Others	Saccharides and Alcohols	95-43-2	B	65541	52116	53302	56986.3	137290	153030	126410	138910	1.41615	2.4376	1.28546	up
pmb0764	C6H9NOS	4-Methyl-5-thiazoleethanol	Others	Others	137-00-8	B	1943.3	3420.2	4375.2	3246.23	7887.7	11522	8794	9401.23	1.31393	2.89604	1.53408	up
mws1080	C12H22O11	Galactinol	Others	Saccharides and Alcohols	3687-64-7	A	406000	548720	653240	535987	1047800	1290400	2055200	1.46447e+06	1.29045	2.73228	1.45011	up
Lmsn000381	C12H22O11	D-Maltose*	Others	Saccharides and Alcohols	133-99-3	A	223400	507550	244020	324990	815030	768470	1427200	1.00357e+06	1.25833	3.08799	1.62667	up
mws5038	C12H22O11	Isomaltulose*	Others	Saccharides and Alcohols	13718-94-0	A	255490	743660	425080	474743	910580	758570	1447600	1.03892e+06	1.09512	2.18838	1.12986	up
pme0519	C12H22O11	D-Sucrose*	Others	Saccharides and Alcohols	57-50-1	A	182650	244490	262910	230017	556120	606250	1065200	742523	1.33237	3.22813	1.6907	up
pmb0801	C14H19NO9	4-Pyridoxic acid-O-glucoside	Others	Vitamin	-	A	26244	25465	39220	30309.7	56537	51851	103740	70709.3	1.20652	2.3329	1.22212	up
pme1841	C5H14N2	Cadaverine	Alkaloids	Phenolamine	462-94-2	B	7716.9	4021.6	4593.8	5444.1	14433	17881	14749	15687.7	1.34339	2.88159	1.52687	up
mws0146	C7H7NO2	Nicotinic Acid Methyl Ester(Methyl Nicotinate)	Alkaloids	Alkaloids	93-60-7	B	28030	50608	30533	36390.3	158260	64699	126960	116640	1.25275	3.20524	1.68043	up
pma0948	C8H11NO	Phenylethanolamine	Alkaloids	Alkaloids	7568-93-6	B	1084500	787450	800560	890837	1808300	2094400	1612600	1.83843e+06	1.36309	2.06372	1.04524	up
pmb0037	C10H15NO	Hordenine	Alkaloids	Alkaloids	539-15-1	B	486980	596890	554790	546220	1304600	887330	1576100	1256010	1.3138	2.29946	1.20129	up
Lmsn009589	C30H48O6	2α,3β,19α,23-Tetrahydroxyurs-12-en-28-oic acid	Terpenoids	Triterpene	-	B	9	9	9	9	1659	3013.1	662.43	1778.18	1.43042	197.575	7.62626	up
Wmzn000227	C6H10O4	2,2-Dimethylsuccinic acid	Organic acids	Organic acids	597-43-3	A	30069	17149	22461	23226.3	110380	124800	35099	90093	1.1968	3.87892	1.95565	up
pme3154	C6H12O4	Mevalonic acid	Organic acids	Organic acids	150-97-0	B	163780	144700	306880	205120	410840	528230	375880	438317	1.22871	2.13688	1.09551	up
Zmjn001813	C7H12O4	Pimelic acid*	Organic acids	Organic acids	111-16-0	B	17555	17102	13911	16189.3	74203	52969	146100	91090.7	1.34193	5.62659	2.49226	up
Lmbn002072	C7H12O4	2-Propylsuccinic acid*	Organic acids	Organic acids	618-57-5	B	27505	22734	22386	24208.3	65073	32484	106470	68009	1.13108	2.80932	1.49022	up
Zmtn001464	C10H7NO4	4,8-Dihydroxyquinoline-2-carboxylic acid	Organic acids	Organic acids	59-00-7	B	9	3539.9	1797.9	1782.27	26573	16347	9467.9	17462.6	1.02992	9.79799	3.29249	up
mws5045	C12H24O3	12-Hydroxydodecanoic acid	Lipids	Free fatty acids	505-95-3	A	1687.8	1043	1146	1292.27	36291	18529	44739	33186.3	1.41345	25.6807	4.68261	up
Zmpn003368	C18H30O3	13S-Hydroxy-9Z,11E,15Z-octadecatrienoic acid	Lipids	Free fatty acids	87984-82-5	B	125380	81260	79466	95368.7	427970	263620	680950	457513	1.32222	4.79731	2.26223	up
Hmqn003054	C18H34O5	9,10,11-Trihydroxy-12-octadecenoic acid	Lipids	Free fatty acids	61911-67-9	A	20419	24757	25660	23612	52006	40538	50171	47571.7	1.3846	2.01472	1.01058	up
Lmbn003970	C18H34O5	9,12,13-TriHOME; 9(S),12(S),13(S)-Trihydroxy-10(E)-octadecenoic acid	Lipids	Free fatty acids	97134-11-7	A	29783	28959	26339	28360.3	85452	86039	92280	87923.7	1.43932	3.10023	1.63238	up
