# Supplementary material for: Elucidating the Differentiation Synthesis Mechanisms of Differently Colored Resistance Quinoa Seedings Using Metabolite Profiling and Transcriptome Analysis
Source: Metabolites. 2023 Oct 10;13(10):1065. doi: 10.3390/metabo13101065 (PMC10609267; doi:10.3390/metabo13101065)
Supplement: Supplementary file 1 [file metabolites-13-01065-s001.zip › Table S11.xlsx]

## Sheet: Sheet1
Table S11 Significantly different metabolites in R-WvsR-Y
Index	Formula	Compounds	Class I	Class II	CAS	Level	R-W1	R-W2	R-W3	R-W average	R-Y1	R-Y2	R-Y3	R-Y average	VIP	Fold_Change	Log2FC	Type
pme3017	C4H9NO2	2-Aminoisobutyric acid	Amino acids and derivatives	Amino acids and derivatives	62-57-7	B	2459900	4501300	3770400	3577200	1578800	1496600	1423000	1.49947e+06	1.36123	0.419173	-1.25438	down
pme1002	C8H11NO	L-Tyramine	Amino acids and derivatives	Amino acids and derivatives	51-67-2	A	3717500	8199700	5686900	5.86803e+06	2349500	2465900	1311600	2.04233e+06	1.27271	0.348044	-1.52266	down
pme2758	C5H9NO5	4-Hydroxy-L-glutamic acid	Amino acids and derivatives	Amino acids and derivatives	3913-68-6	A	40438	60205	68309	56317.3	27379	24163	11600	21047.3	1.25221	0.373727	-1.41994	down
Lmbp000123	C6H13NO2S	L-Homomethionine	Amino acids and derivatives	Amino acids and derivatives	25148-30-5	B	87365	155730	295490	179528	39607	29813	18575	29331.7	1.32544	0.163382	-2.61368	down
pme2559	C6H9NO5	N-Acetyl-L-Aspartic Acid	Amino acids and derivatives	Amino acids and derivatives	997-55-7	A	34519	56545	38458	43174	29785	18140	11627	19850.7	1.18013	0.459783	-1.12098	down
pmb0468	C6H11NO3S	N-Formyl-L-Methionine	Amino acids and derivatives	Amino acids and derivatives	4289-98-9	B	125610	158680	126840	137043	24420	22186	59326	35310.7	1.36787	0.257661	-1.95646	down
pme0278	C7H14N2O4	2,6-Diaminooimelic acid	Amino acids and derivatives	Amino acids and derivatives	583-93-7	B	18992	34169	37768	30309.7	5503.8	7228.4	3073.9	5268.7	1.37771	0.173829	-2.52426	down
mws4176	C12H16N2O3	L-Alanyl-L-Phenylalanine	Amino acids and derivatives	Amino acids and derivatives	3061-90-3	B	30228	102840	158440	97169.3	28055	15813	23433	22433.7	1.14791	0.230872	-2.11484	down
Lmhp002001	C14H20N2O3	L-Valyl-L-Phenylalanine	Amino acids and derivatives	Amino acids and derivatives	3918-92-1	B	97327	273850	372230	247802	81431	55016	62377	66274.7	1.20609	0.26745	-1.90266	down
mws5035	C15H22N2O3	L-Leucyl-L-phenylalanine	Amino acids and derivatives	Amino acids and derivatives	56217-82-4	B	131480	421980	442210	331890	31146	33892	40563	35200.3	1.38523	0.10606	-3.23704	down
mws0636	C18H20N2O3	L-Phenylalanyl-L-phenylalanine	Amino acids and derivatives	Amino acids and derivatives	2577-40-4	A	21526	57554	44436	41172	9233	9448	8990	9223.67	1.37	0.224028	-2.15825	down
pmb0069	C7H7NO	Benzamide	Phenolic acids	Phenolic acids	55-21-0	B	45586000	93791000	74501000	7.12927e+07	47135000	24667000	11821000	2.78743e+07	1.11114	0.390985	-1.35482	down
ML10179289	C8H10O	2-Phenylethanol	Phenolic acids	Phenolic acids	60-12-8	B	29372000	71299000	52099000	5.09233e+07	31096000	15435000	6766400	17765800	1.10675	0.348873	-1.51922	down
Zmyn002919	C8H8O2	2-Methylbenzoic acid	Phenolic acids	Phenolic acids	118-90-1	B	4702.1	4758.7	3420.3	4293.7	3087.9	422.1	1737	1749	1.0487	0.407341	-1.29569	down
pme1439	C9H8O3	p-Coumaric acid	Phenolic acids	Phenolic acids	501-98-4	A	5277700	3980600	2601600	3953300	846230	1534100	2173100	1517810	1.22812	0.383935	-1.38107	down
pme3083	C8H7NO3	2-(Formylamino)benzoic acid	Phenolic acids	Phenolic acids	3342-77-6	B	191890	435020	466040	364317	116970	100070	108300	108447	1.32209	0.297671	-1.74821	down
Hmbp001276	C8H8O4	Gallacetophenone	Phenolic acids	Phenolic acids	528-21-2	B	125800	132080	97885	118588	7474.6	22208	17536	15739.5	1.40969	0.132724	-2.9135	down
Lmrn001951	C9H10O4	(S)-2-Hydroxy-3-(4-Hydroxyphenyl)Propanoic Acid	Phenolic acids	Phenolic acids	23508-35-2	B	10469	7389.5	5677.4	7845.3	9	9	9	9	1.4789	0.00114718	-9.76769	down
Lmdn003756	C10H10O4	Methyl caffeate	Phenolic acids	Phenolic acids	3843-74-1	A	96931	170920	431690	233180	37905	3744.5	2155.8	14601.8	1.2693	0.0626201	-3.99723	down
Lmhn003240	C11H10O6	Benzoylmalic acid	Phenolic acids	Phenolic acids	22138-51-8	A	6374300	15692000	7624100	9896800	78649	95234	107410	93764.3	1.47214	0.00947421	-6.72178	down
Lmhn003373	C11H10O7	p-Hydroxybenzoylmalic acid	Phenolic acids	Phenolic acids	-	B	502780	1311600	462440	758940	12034	10695	14128	12285.7	1.46464	0.0161879	-5.94894	down
pme3472	C12H16O7	Arbutin	Phenolic acids	Phenolic acids	497-76-7	B	106980	221360	95393	141244	33686	31739	15330	26918.3	1.35225	0.19058	-2.39153	down
pmn001690	C16H24O7	3-Hydroxy-4-isopropylbenzylalcohol-3-O-glucoside	Phenolic acids	Phenolic acids	-	B	155370	244830	199310	199837	107450	45501	43767	65572.7	1.3021	0.328131	-1.60765	down
Lmmn003663	C14H18O9	5-Glucosyloxy-2-Hydroxybenzoic acid methyl ester	Phenolic acids	Phenolic acids	-	B	61872	77926	53027	64275	4361.6	5940.2	8119.6	6140.47	1.46308	0.0955343	-3.38784	down
Zmhn001883	C14H18O9	Vanillic acid-4-O-glucoside	Phenolic acids	Phenolic acids	32142-31-7	B	37299	29741	39965	35668.3	3232.4	7400.1	3886.2	4839.57	1.42644	0.135682	-2.88169	down
Hmmn002544	C16H20O9	Ferulic acid-4-O-glucoside	Phenolic acids	Phenolic acids	117405-51-3	A	268030	239380	393150	300187	88539	177220	88946	118235	1.26943	0.393872	-1.3442	down
Zmhn002334	C16H20O9	6-O-Feruloyl-D-glucose	Phenolic acids	Phenolic acids	137887-25-3	B	2723400	1760300	1617800	2.03383e+06	630400	1021800	606170	752790	1.33414	0.370134	-1.43388	down
pma3724	C17H20O9	1-O-Feruloylquinic acid	Phenolic acids	Phenolic acids	-	B	433530	332470	350590	372197	196760	197180	95959	163300	1.26409	0.438746	-1.18854	down
pmb0752	C17H20O9	3-O-Feruloylquinic acid	Phenolic acids	Phenolic acids	1899-29-2	B	704710	437310	480960	540993	316590	280160	113730	236827	1.14323	0.437763	-1.19178	down
pmb3072	C22H26O12	3-O-p-Coumaroylshikimic acid-O-glucoside	Phenolic acids	Phenolic acids	-	B	34816	19969	21809	25531.3	11993	6566	16258	11605.7	1.18526	0.454566	-1.13744	down
pmb0824	C25H28O13	Syringic acid-4-O-(6''-feruloyl)glucoside	Phenolic acids	Phenolic acids	-	B	35030	34288	44227	37848.3	20130	20155	12522	17602.3	1.3318	0.465076	-1.10446	down
pme3200	C2H7N3	1-methylguanidine	Nucleotides and derivatives	Nucleotides and derivatives	471-29-4	B	51021	107940	59709	72890	9	7407.1	1621.1	3012.4	1.14515	0.041328	-4.59674	down
mws0255	C4H5N3O	Cytosine	Nucleotides and derivatives	Nucleotides and derivatives	71-30-7	B	2021600	4700000	3757000	3.49287e+06	1588800	1975900	1433100	1.66593e+06	1.16629	0.476953	-1.06808	down
pmb0374	C5H5N5	2-Aminopurine	Nucleotides and derivatives	Nucleotides and derivatives	452-06-2	A	94635	432720	308470	278608	69177	64912	45513	59867.3	1.21502	0.21488	-2.2184	down
pme1109	C5H5N5O	Guanine	Nucleotides and derivatives	Nucleotides and derivatives	73-40-5	A	301260	986570	1152000	813277	287520	258440	244550	263503	1.11479	0.324002	-1.62593	down
mws0863	C5H11O7P	2-Deoxyribose-5'-phosphate	Nucleotides and derivatives	Nucleotides and derivatives	102916-66-5	B	21046	52574	22601	32073.7	14259	21090	9439.9	14929.6	1.03001	0.465479	-1.10321	down
pme1194	C9H13N3O4	2'-Deoxycytidine	Nucleotides and derivatives	Nucleotides and derivatives	951-77-9	B	25048	75122	34935	45035	29048	17174	15161	20461	1.02527	0.454336	-1.13817	down
ML10180524	C9H13N3O5	Cytarabine	Nucleotides and derivatives	Nucleotides and derivatives	147-94-4	B	235430	906380	755690	632500	291920	206760	140880	213187	1.06392	0.337054	-1.56895	down
mws0248	C9H12N2O6	Uridine	Nucleotides and derivatives	Nucleotides and derivatives	58-96-8	A	224070	1557400	998350	926607	197560	187970	156790	180773	1.12257	0.195092	-2.35778	down
pme3961	C10H13N5O3	2'-Deoxyadenosine	Nucleotides and derivatives	Nucleotides and derivatives	958-09-8	A	139800	456530	415830	337387	157470	113670	82190	117777	1.10859	0.349085	-1.51835	down
pme0230	C10H13N5O4	Adenosine	Nucleotides and derivatives	Nucleotides and derivatives	58-61-7	A	914010	3795200	2852600	2.5206e+06	623680	442250	416480	494137	1.26647	0.196039	-2.35079	down
Lmqp000329	C8H14N3O7P	5-Aminoimidazole ribonucleotide	Nucleotides and derivatives	Nucleotides and derivatives	25635-88-5	A	1009000	1055600	614780	893127	75346	81911	36591	64616	1.43935	0.0723481	-3.7889	down
pmb0197	C11H15N5O5	N7-Methylguanosine	Nucleotides and derivatives	Nucleotides and derivatives	20244-86-4	B	95253	74427	64559	78079.7	43414	39434	31404	38084	1.36245	0.487758	-1.03576	down
mws0884	C10H12N5O6P	Cyclic 3',5'-Adenylic acid	Nucleotides and derivatives	Nucleotides and derivatives	60-92-4	A	119310	435580	327000	293963	80821	52834	49381	61012	1.28449	0.20755	-2.26847	down
mws0675	C11H15N2O8P	β-Nicotinamide mononucleotide	Nucleotides and derivatives	Nucleotides and derivatives	1094-61-7	B	250030	970870	473850	564917	82102	122180	83320	95867.3	1.32654	0.169702	-2.55893	down
mws0609	C10H12N5O7P	Guanosine 3',5'-cyclic monophosphate	Nucleotides and derivatives	Nucleotides and derivatives	7665-99-8	A	108420	178080	293450	193317	82073	56278	109240	82530.3	1.12812	0.426918	-1.22797	down
pme0376	C15H12O5	Naringenin (5,7,4'-Trihydroxyflavanone)	Flavonoids	Dihydroflavone	480-41-1	A	71031	78951	64544	71508.7	49155	26538	26545	34079.3	1.30018	0.476576	-1.06922	down
mws1068	C15H10O6	Kaempferol (3,5,7,4'-Tetrahydroxyflavone)	Flavonoids	Flavonols	520-18-3	A	746400	726760	862770	778643	73036	39193	31147	47792	1.45307	0.0613786	-4.02612	down
mws1094	C15H12O6	Aromadendrin (Dihydrokaempferol)	Flavonoids	Dihydroflavonol	480-20-6	B	23530	27563	20730	23941	7415.9	7019.8	8358.8	7598.17	1.46624	0.31737	-1.65576	down
Lmbp003668	C20H18O10	Kaempferol-3-O-arabinoside	Flavonoids	Flavonoid	-	B	1480300	2128100	1318200	1642200	692780	94605	37916	275100	1.20489	0.167519	-2.5776	down
mws0919	C21H20O10	Kaempferol-3-O-rhamnoside (Afzelin)	Flavonoids	Flavonols	482-39-3	A	37332	63849	52065	51082	4006.2	9	9	1341.4	1.25601	0.0262597	-5.251	down
pme0321	C21H20O10	Kaempferol-7-O-rhamnoside	Flavonoids	Flavonols	20196-89-8	B	33407	32975	26933	31105	8519.7	3028.2	3740.8	5096.23	1.40369	0.16384	-2.60964	down
mws2209	C21H20O11	Kaempferol-3-O-glucoside (Astragalin)	Flavonoids	Flavonols	480-10-4	B	6709400	10585000	12832000	1.00421e+07	3370800	618780	383330	1.45764e+06	1.27059	0.145152	-2.78436	down
Hmpp003270	C21H20O11	Luteolin-4'-O-glucoside	Flavonoids	Flavonoid	6920-38-3	A	9270900	12800000	11176000	11082300	894970	461650	404310	586977	1.45717	0.0529652	-4.23881	down
Lmlp003531	C21H20O11	Luteolin-3'-O-glucoside	Flavonoids	Flavonoid	5154-41-6	A	7955800	11524000	12408000	1.06293e+07	956150	424090	429110	603117	1.44863	0.0567411	-4.13946	down
pme2459	C21H20O11	Luteolin-7-O-glucoside (Cynaroside)	Flavonoids	Flavonoid	5373-11-5	A	4450000	3165000	2633900	3416300	2672200	1186400	374480	1.41103e+06	1.01708	0.413028	-1.27569	down
Lmtn002796	C21H22O11	Aromadendrin-7-O-glucoside	Flavonoids	Flavonoid	28189-90-4	B	603880	535660	550250	563263	137710	101510	136660	125293	1.46845	0.222442	-2.1685	down
mws0057	C21H22O11	Eriodictyol-7-O-glucoside	Flavonoids	Dihydroflavone	38965-51-4	B	98693	56940	74542	76725	44423	33295	18893	32203.7	1.22035	0.419728	-1.25247	down
Lmmn004625	C21H22O11	Dihydrokaempferol-7-O-glucoside	Flavonoids	Flavonols	-	B	40412	36211	23649	33424	3574.6	2537	901.55	2337.72	1.40478	0.0699413	-3.83771	down
Lmzn001894	C21H18O12	Kaempferol-3-O-glucuronide	Flavonoids	Flavonols	22688-78-4	A	5085600	4329600	5181000	4865400	2012400	914080	803490	1.24332e+06	1.36699	0.255544	-1.96836	down
mws4167	C21H18O12	Luteolin-7-O-glucuronide	Flavonoids	Flavonoid	29741-10-4	A	17339000	16565000	15231000	1.63783e+07	5438900	2935200	3433700	3.93593e+06	1.43431	0.240313	-2.05701	down
pmp000583	C22H20O12	Diosmetin-7-O-glucuronide	Flavonoids	Flavonoid	35110-20-4	B	1486300	2884200	1679400	2.01663e+06	972510	736570	309280	672787	1.21189	0.333619	-1.58373	down
Lmmn003398	C23H22O12	Kaempferol-3-O-(6''-acetyl)glucoside	Flavonoids	Flavonols	-	B	132720	115150	96282	114717	50225	3865.8	12380	22156.9	1.2192	0.193144	-2.37225	down
HJAP135	C24H24O12	Pinocembrin-7-O-(6''-O-malonyl)glucoside	Flavonoids	Flavonoid	-	A	3318300	2226000	2306100	2616800	1848000	582400	426060	952153	1.16475	0.363862	-1.45854	down
pmp000587	C24H22O14	Luteolin-7-O-(6''-malonyl)glucoside	Flavonoids	Flavonoid	-	A	17920	11612	24509	18013.7	4384.7	9	9	1467.57	1.17586	0.0814696	-3.61759	down
Lmdp004892	C24H22O14	Kaempferol-3-O-(6''-malonyl)galactoside	Flavonoids	Flavonols	-	A	2022500	2663000	3069300	2.58493e+06	489890	68537	111390	223272	1.35898	0.0863745	-3.53325	down
pmb0608	C25H24O14	Chrysoeriol-7-O-(6''-malonyl)glucoside	Flavonoids	Flavonoid	-	A	102480	48679	87248	79469	67849	12990	15998	32279	1.04305	0.406184	-1.2998	down
HJAP148	C26H28O15	Kaempferol-3-O-sambubioside	Flavonoids	Flavonoid	27661-51-4	A	17980000	15097000	15332000	1.61363e+07	2856000	2148100	3888100	2.96407e+06	1.45464	0.183689	-2.44466	down
Hmjn004446	C30H26O13	Luteolin-7-O-(6''-caffeoyl)rhamnoside	Flavonoids	Flavonoid	-	B	596500	622230	914860	711197	72288	39838	31910	48012	1.44596	0.0675088	-3.88878	down
pmp001079	C27H30O15	Luteolin-7-O-neohesperidoside (Lonicerin)*	Flavonoids	Flavonoid	25694-72-8	A	221730	133500	102020	152417	91677	37728	23096	50833.7	1.16909	0.333518	-1.58416	down
pmp000593	C27H30O15	Luteolin-7-O-rutinoside*	Flavonoids	Flavonoid	3563-98-2	A	2079900	1538300	1407800	1.67533e+06	1127000	590300	345820	687707	1.18617	0.410489	-1.28458	down
Lmsn002815	C27H30O15	Kaempferol-3-O-rutinoside(Nicotiflorin)*	Flavonoids	Flavonoid	17650-84-9	A	3995000	4965400	5280600	4747000	1419100	1440300	3902500	2.25397e+06	1.17081	0.474819	-1.07455	down
Zmcp003989	C27H30O15	Kaempferol-3-O-rhamnosyl(1→2)glucoside	Flavonoids	Flavonoid	-	A	1001900	1309500	938900	1.08343e+06	86174	50820	39328	58774	1.45876	0.0542479	-4.20429	down
Hmjp003008	C27H28O16	Luteolin-7-O-glucuronide-5-O-rhamnoside	Flavonoids	Flavonoid	-	A	13013000	19432000	18961000	1.71353e+07	2260400	3708600	4167300	3.37877e+06	1.42954	0.197181	-2.34241	down
pmp001080	C28H32O15	Diosmetin-7-O-Neohesperidoside (Neodiosmin)	Flavonoids	Flavonoid	38665-01-9	B	123100	204460	153660	160407	65406	64371	64426	64734.3	1.41064	0.403564	-1.30913	down
Zmlp003063	C33H40O19	Luteolin-7-O-(2''-O-rhamnosyl)rutinoside	Flavonoids	Flavonoid	-	B	1478400	1940800	1648200	1.68913e+06	104550	71224	43086	72953.3	1.45736	0.0431898	-4.53317	down
Lmsp003881	C33H40O19	Kaempferol-3-O-rutinoside-7-O-rhamnoside	Flavonoids	Flavonols	-	A	34079000	44712000	36298000	38363000	3116600	2554300	2068500	2579800	1.47162	0.0672471	-3.89438	down
Hmqp002870	C32H38O20	Luteolin-7-O-Sophoroside-5-O-arabinoside	Flavonoids	Flavonoid	-	B	1916500	2723300	1748500	2.12943e+06	172370	138150	73848	128123	1.44919	0.0601675	-4.05487	down
Lmyp003857	C35H28O19	Kaempferol-3-O-(2'',6''-digalloyl)glucoside	Flavonoids	Flavonoid	-	B	918740	775950	832610	842433	360120	361510	319440	347023	1.46117	0.41193	-1.27953	down
pmb0676	C38H40O19	Chrysoeriol-8-C-glucoside-7-O-(6''-feruloyl)glucoside	Flavonoids	Flavonoid carbonoside	-	B	363060	271740	246270	293690	143700	93705	109830	115745	1.39261	0.394106	-1.34334	down
Lmgp003270	C16H16O10	Scopoletin-7-O-glucuronide	Lignans and Coumarins	Coumarins	132752-65-9	B	413960	257540	216220	295907	144150	107590	46467	99402.3	1.21468	0.335925	-1.57379	down
Rfmb25702	C28H34O12	Pinoresinol-4-O-(6''-acetyl)glucoside	Lignans and Coumarins	Lignans	-	B	69866	77697	134320	93961	15096	3268.3	5226.5	7863.6	1.38454	0.08369	-3.5788	down
pma0134	C4H8O4	D-(-)-Threose	Others	Saccharides and Alcohols	95-43-2	B	97315	213870	142120	151102	85721	80394	48872	71662.3	1.15521	0.474266	-1.07623	down
pmp000509	C6H6O3	Maltol	Others	Others	118-71-8	B	196710	243050	274520	238093	9	9	9	9	1.48001	3.78003e-05	-14.6912	down
pme3705	C6H10O7	D-Glucoronic acid*	Others	Saccharides and Alcohols	6556-12-3	B	42438	34340	37431	38069.7	16262	12937	6114.3	11771.1	1.32047	0.309199	-1.69339	down
Zmzn000079	C4H9O7P	D-Erythrose-4-phosphate	Others	Saccharides and Alcohols	585-18-2	B	117650	143950	140170	133923	51615	76460	65221	64432	1.39535	0.481111	-1.05556	down
pma3101	C11H14NO6+	Nicotinate D-ribonucleoside	Others	Vitamin	17720-18-2	B	519270	1818100	1995400	1.44426e+06	635630	465030	314860	471840	1.06406	0.326701	-1.61396	down
Zmyn000110	C6H14NO8P	D-Glucosamine 1-phosphate	Others	Saccharides and Alcohols	2152-75-2	B	80312	67747	101390	83149.7	22674	52516	17403	30864.3	1.22511	0.37119	-1.42977	down
pmb0789	C14H21NO8	Pyridoxine-5'-O-glucoside	Others	Vitamin	-	B	486820	485050	522610	498160	177660	175400	168530	173863	1.4763	0.349011	-1.51866	down
pme2292	C4H12N2	Putrescine	Alkaloids	Phenolamine	110-60-1	B	48504	96358	91373	78745	18474	24507	22325	21768.7	1.38594	0.276445	-1.85494	down
mws0491	C8H11N	Phenethylamine	Alkaloids	Alkaloids	64-04-0	A	14804000	41514000	29508000	2.86087e+07	16134000	7601900	3274900	9003600	1.11014	0.314716	-1.66788	down
pma0948	C8H11NO	Phenylethanolamine	Alkaloids	Alkaloids	7568-93-6	B	1391400	3071900	2197000	2220100	978610	1019600	524410	840873	1.23355	0.378755	-1.40066	down
mws0005	C10H12N2	Tryptamine	Alkaloids	Plumerane	61-54-1	A	9835200	23290000	13673000	15599400	1286800	1859100	2323700	1823200	1.42948	0.116876	-3.09695	down
pmb0774	C10H12N2O	N-Hydroxytryptamine*	Alkaloids	Phenolamine	-	A	4116600	4784500	3845200	4.24877e+06	787860	716050	1589800	1.03124e+06	1.40887	0.242714	-2.04267	down
pme2024	C10H12N2O	Serotonin*	Alkaloids	Plumerane	50-67-9	A	5173200	5863800	4746000	5261000	1030200	1060500	2053200	1381300	1.41442	0.262555	-1.92931	down
Zmtn001624	C10H7NO3	N-Acetylisatin	Alkaloids	Plumerane	574-17-4	A	702140	746890	557250	668760	174350	151290	93713	139784	1.42901	0.20902	-2.25829	down
pmp001252	C17H17NO3	p-Coumaroyltyramine	Alkaloids	Phenolamine	36417-86-4	B	9	3192.6	4625.6	2609.07	9	9	9	9	1.04681	0.00344951	-8.17939	down
Lmlp003024	C20H30O7N4	N'-p-Coumaroylagmatine-glucoside	Alkaloids	Phenolamine	-	B	84348	76584	160070	107001	15073	9	9	5030.33	1.19332	0.0470122	-4.41082	down
Lmsn012425	C30H48O4	Rubusic acid (3β,7α-Dihydroxyolean-12-en-28-oic acid)	Terpenoids	Triterpene	23984-26-1	A	5002.5	25951	21727	17560.2	6065.3	3017.9	6308.9	5130.7	1.01779	0.292178	-1.77508	down
Lmmn004145	C38H60O10	3-O-(2-O-Acetyl-glucosyl)oleanolic acid	Terpenoids	Triterpene	-	A	8279200	14132000	13660000	1.20237e+07	5443800	5071100	5486300	5.33373e+06	1.35579	0.4436	-1.17267	down
pmn001505	C41H64O13	Oleanolic acid-3-O-xylosyl(1→3)glucuronide	Terpenoids	Triterpene	-	A	56503	149810	121710	109341	44219	33019	40158	39132	1.24989	0.35789	-1.48241	down
pme0275	C5H8O3	4-Oxopentanoic Acid	Organic acids	Organic acids	123-76-2	B	12744	16422	13079	14081.7	4741.2	6876.6	7913	6510.27	1.36523	0.462322	-1.11303	down
mws0823	C5H8O3	3-Methyl-2-Oxobutanoic acid	Organic acids	Organic acids	759-05-7	B	52394	96473	55644	68170.3	22968	49129	28496	33531	1.14407	0.491871	-1.02365	down
mws0208	C6H10O4	Adipic Acid*	Organic acids	Organic acids	124-04-9	B	1136800	1605000	827540	1189780	340330	483310	293610	372417	1.36621	0.313013	-1.67571	down
Lmbn001609	C6H10O4	2-Acetyl-2-Hydroxybutanoic Acid	Organic acids	Organic acids	-	B	165610	226710	121710	171343	42348	65098	37757	48401	1.38115	0.28248	-1.82378	down
mws0924	C6H10O4	2-Methylglutaric acid*	Organic acids	Organic acids	617-62-9	B	985410	1429400	701710	1038840	281600	379960	260200	307253	1.38059	0.295766	-1.75747	down
mws0159	C9H8O3	Phenylpyruvic acid	Organic acids	Organic acids	156-06-9	B	302470	169580	145420	205823	81805	101420	122340	101855	1.18786	0.494866	-1.01489	down
mws0344	C5H10O6	D-Xylonic acid	Organic acids	Organic acids	526-91-0	A	4037500	5216700	4517500	4.59057e+06	2331800	1545400	997410	1624870	1.33385	0.353958	-1.49835	down
mws0242	C8H14O4	Suberic Acid	Organic acids	Organic acids	505-48-6	B	151460	162920	75910	130097	43590	49129	36312	43010.3	1.33592	0.330603	-1.59683	down
mws1189	C6H10O7	D-Galacturonic acid*	Organic acids	Organic acids	685-73-4	B	25146	49642	31359	35382.3	17387	16874	7560.4	13940.5	1.20202	0.393995	-1.34375	down
Zmtn001464	C10H7NO4	4,8-Dihydroxyquinoline-2-carboxylic acid	Organic acids	Organic acids	59-00-7	B	59538	50254	39310	49700.7	27644	12213	11616	17157.7	1.30217	0.34522	-1.53441	down
Lmmn003323	C16H32O3	2-Hydroxyhexadecanoic acid	Organic acids	Organic acids	764-67-0	B	159900	414110	316050	296687	140580	154330	141260	145390	1.11138	0.490046	-1.02901	down
mws0120	C8H20NO6P	Choline Alfoscerate	Lipids	PC	28319-77-9	B	418570	449420	281720	383237	34629	46841	20055	33841.7	1.43848	0.0883049	-3.50136	down
Lmbn004685	C18H32O4	5S,8R-DiHODE; (5S,8R,9Z,12Z)-5,8-Dihydroxyoctadeca-9,12-dienoate	Lipids	Free fatty acids	-	A	27147	80233	9814.6	39064.9	8562.6	6687.7	5801.9	7017.4	1.12248	0.179635	-2.47686	down
Lmhp011562	C21H36O4	1-α-Linolenoyl-glycerol	Lipids	Glycerol ester	-	A	3437400	7829600	5664300	5.64377e+06	2416100	2298400	2420100	2378200	1.28095	0.421385	-1.24679	down
Lmhp011388	C21H36O4	2-α-Linolenoyl-glycerol	Lipids	Glycerol ester	55268-58-1	A	1447000	3596300	2610300	2551200	705430	958390	852200	838673	1.31053	0.328737	-1.605	down
Lmhp012042	C21H38O4	2-Linoleoylglycerol	Lipids	Glycerol ester	3443-82-1	A	504830	864500	544690	638007	301470	294710	209640	268607	1.33421	0.421009	-1.24808	down
Lmhp112042	C21H38O4	1-Linoleoylglycerol	Lipids	Glycerol ester	2277-28-3	A	519880	867700	555620	647733	304130	285780	224120	271343	1.35965	0.418912	-1.25528	down
Lmhp008337	C19H40NO7P	LysoPE 14:0(2n isomer)	Lipids	LPE	-	B	13347	44099	19165	25537	13991	7032.8	11636	10886.6	1.02862	0.426307	-1.23004	down
pmb0864	C19H40NO7P	LysoPE 14:0	Lipids	LPE	-	B	56088	233240	96071	128466	52061	32793	38607	41153.7	1.1193	0.320346	-1.6423	down
Lmhp008440	C20H40NO7P	LysoPE 15:1	Lipids	LPE	-	A	2219.3	9963.5	5030.8	5737.87	9	9	9	9	1.46852	0.00156853	-9.31637	down
Lmhp008273	C20H40NO7P	LysoPE 15:1(2n isomer)	Lipids	LPE	-	B	706.12	2973.4	927.71	1535.74	365.38	429.11	586.32	460.27	1.1156	0.299705	-1.73838	down
Lmhp009187	C20H42NO7P	LysoPE 15:0	Lipids	LPE	-	A	41224	113640	70903	75255.7	30841	19192	22352	24128.3	1.27494	0.320618	-1.64107	down
Lmhp008885	C20H42NO7P	LysoPE 15:0(2n isomer)	Lipids	LPE	-	A	7691	20299	14066	14018.7	6943.2	4935.5	7531.4	6470.03	1.13072	0.46153	-1.1155	down
Lmhp008763	C21H42NO7P	LysoPE 16:1(2n isomer)	Lipids	LPE	-	A	34661	65767	48455	49627.7	26028	17459	16262	19916.3	1.31429	0.401315	-1.31719	down
Lmhp009034	C21H42NO7P	LysoPE 16:1	Lipids	LPE	-	A	108180	331840	147740	195920	90248	44510	62989	65915.7	1.18604	0.336442	-1.57157	down
pmd0160	C21H44NO7P	LysoPE 16:0(2n isomer)	Lipids	LPE	-	A	1236400	4181300	2122200	2513300	1183100	716340	1014800	971413	1.11468	0.386509	-1.37143	down
pmb0876	C21H44NO7P	LysoPE 16:0	Lipids	LPE	53862-35-4	A	5161700	19769000	10975000	1.19686e+07	4087900	2966800	4007200	3687300	1.1854	0.308082	-1.69861	down
Lmhp009464	C22H44NO7P	LysoPE 17:1(2n isomer)	Lipids	LPE	-	A	17111	61212	35163	37828.7	12037	7139.4	13432	10869.5	1.21426	0.287334	-1.7992	down
Lmhp009769	C22H44NO7P	LysoPE 17:1	Lipids	LPE	-	A	18614	63149	32045	37936	13564	9323.7	9538.3	10808.7	1.24869	0.284918	-1.81138	down
Lmhp008233	C23H40NO7P	LysoPE 18:4	Lipids	LPE	-	A	3035.4	7087.9	4909.7	5011	2165	1968.9	1065.3	1733.07	1.24734	0.345852	-1.53177	down
Lmhp008589	C23H42NO7P	LysoPE 18:3(2n isomer)	Lipids	LPE	-	A	2121900	6996300	4204200	4440800	2149500	2227600	1583400	1.98683e+06	1.03394	0.447404	-1.16035	down
Lmhp008801	C23H42NO7P	LysoPE 18:3	Lipids	LPE	-	A	1967200	6253700	2760600	3660500	1969600	1459600	1497700	1642300	1.04224	0.448655	-1.15632	down
pmb0874	C23H44NO7P	LysoPE 18:2(2n isomer)	Lipids	LPE	-	A	11036000	31849000	20624000	2.11697e+07	9423600	8147300	6237100	7936000	1.19813	0.374876	-1.41551	down
pmb0881	C23H44NO7P	LysoPE 18:2	Lipids	LPE	-	A	6543400	17049000	8785200	1.07925e+07	5363600	3760400	3928800	4.35093e+06	1.20855	0.403143	-1.31064	down
pmb2260	C23H46NO7P	LysoPC 15:1	Lipids	LPC	-	A	7239.5	26033	10985	14752.5	3394.7	4895.8	5289.1	4526.53	1.19178	0.306832	-1.70448	down
pmb0883	C23H48NO7P	LysoPE 18:0	Lipids	LPE	69747-55-3	A	24472	89637	44725	52944.7	19017	14395	21194	18202	1.15343	0.343793	-1.54039	down
pmb2319	C23H48NO7P	LysoPC 15:0	Lipids	LPC	108273-89-8	A	87974	179680	119830	129161	68795	49410	58745	58983.3	1.27595	0.456664	-1.13079	down
Lmhp009129	C23H48NO7P	LysoPC 15:0(2n isomer)	Lipids	LPC	-	A	23640	35513	27864	29005.7	18417	10627	11493	13512.3	1.30988	0.465852	-1.10206	down
pmp001270	C24H48NO7P	LysoPC 16:1	Lipids	LPC	76790-27-7	A	298370	707400	322100	442623	274730	185530	195680	218647	1.09103	0.493979	-1.01748	down
Lmhp008833	C24H48NO7P	LysoPC 16:1(2n isomer)	Lipids	LPC	-	A	217770	543720	289760	350417	167640	156660	120370	148223	1.20375	0.422992	-1.2413	down
pmb0855	C24H50NO7P	LysoPC 16:0	Lipids	LPC	17364-16-8	A	16464000	42906000	23244000	27538000	12009000	11142000	13401000	12184000	1.18681	0.442443	-1.17644	down
Lmhp010040	C25H46NO7P	LysoPE 20:3	Lipids	LPE	-	A	10230	41778	16327	22778.3	10110	6415.3	7044.1	7856.47	1.08096	0.34491	-1.53571	down
Lmhp009802	C25H46NO7P	LysoPE 20:3(2n isomer)	Lipids	LPE	-	A	9820.9	45046	16330	23732.3	10023	7244	8157.8	8474.93	1.01227	0.357105	-1.48558	down
Lmhp010514	C25H48NO7P	LysoPE 20:2(2n isomer)	Lipids	LPE	-	A	7661.7	32325	11652	17212.9	6686.2	5039.3	5517.5	5747.67	1.08647	0.333916	-1.58244	down
Lmhp008718	C25H48NO7P	LysoPC 17:2	Lipids	LPC	-	A	32236	129640	46123	69333	18258	15106	12297	15220.3	1.25388	0.219525	-2.18754	down
Lmhp010757	C25H48NO7P	LysoPE 20:2	Lipids	LPE	-	A	19265	109890	36410	55188.3	18471	10828	13181	14160	1.08945	0.256576	-1.96254	down
Lmhp009590	C25H50NO7P	LysoPC 17:1	Lipids	LPC	-	A	36866	95585	50845	61098.7	27309	24675	28807	26930.3	1.19049	0.440768	-1.18191	down
pmp001251	C26H50NO7P	LysoPC 18:2(2n isomer)	Lipids	LPC	-	A	1395900	4967200	2105300	2822800	1091200	977610	820480	963097	1.15599	0.341185	-1.55137	down
pmp001273	C26H50NO7P	LysoPC 18:2	Lipids	LPC	-	A	1001200	2507300	1139900	1.54947e+06	803270	612490	685610	700457	1.15236	0.452063	-1.1454	down
mws0126	C26H54NO7P	LysoPC 18:0	Lipids	LPC	19420-57-6	A	272160	780920	422500	491860	241950	212180	246150	233427	1.09036	0.474579	-1.07528	down
Lmhp007840	C27H52NO7P	LysoPC 19:2	Lipids	LPC	-	A	6838.4	33061	21970	20623.1	6357.8	5475.2	5163.9	5665.63	1.12685	0.274722	-1.86395	down
Lmhp009190	C33H58O14	2-Linoleoylglycerol-1,3-di-O-glucoside	Lipids	Glycerol ester	-	A	18459	30982	39617	29686	11976	10981	8864.4	10607.1	1.32276	0.357311	-1.48475	down
pme3388	C7H16N4O2	Homoarginine	Amino acids and derivatives	Amino acids and derivatives	156-86-5	B	7843.3	6262.5	12838	8981.27	9005.2	77169	73484	53219.4	1.04356	5.9256	2.56696	up
mws2213	C9H8O2	Cinnamic acid	Phenolic acids	Phenolic acids	140-10-3	A	5057.4	8270.1	18485	10604.2	15771	34584	32192	27515.7	1.12325	2.5948	1.37562	up
Lmxp001668	C9H10O2	2-Methoxy-4-ethenylphenol	Phenolic acids	Phenolic acids	7786-61-0	A	145100	109600	25633	93444.3	529010	617560	458980	535183	1.28843	5.7273	2.51785	up
pme2362	C8H8O3	Mandelic acid	Phenolic acids	Phenolic acids	90-64-2	B	44417	33312	28606	35445	100870	100070	108520	103153	1.43563	2.91024	1.54114	up
mws0458	C8H8O3	Vanillin	Phenolic acids	Phenolic acids	121-33-5	B	16679	44362	45089	35376.7	139460	190800	273390	201217	1.35714	5.68784	2.50788	up
mws0183	C7H6O4	3,4-Dihydroxybenzoic acid (Protocatechuic acid)*	Phenolic acids	Phenolic acids	99-50-3	A	21305	28042	15342	21563	41818	61613	65303	56244.7	1.33284	2.60839	1.38316	up
pme3381	C9H10O3	3-Hydroxyphenylacetic Acid Methyl Ester	Phenolic acids	Phenolic acids	42058-59-3	B	1132	1289.4	2851.5	1757.63	4658.3	11547	6050	7418.43	1.31308	4.22069	2.07748	up
mws0009	C10H10O3	Coniferaldehyde	Phenolic acids	Phenolic acids	20649-42-7	B	26800	16015	62845	35220	99813	187610	145930	144451	1.29966	4.10139	2.03611	up
Lmhn002629	C11H10O7	Benzoyltartaric acid	Phenolic acids	Phenolic acids	-	B	9	9	9	9	1162200	921700	765490	949797	1.48051	105533	16.6873	up
Lmhn001477	C13H12O9	2-Caffeoyl-L-tartaric acid (Caftaric acid)	Phenolic acids	Phenolic acids	67879-58-7	A	9	9	9	9	79789	58994	72481	70421.3	1.47983	7824.59	12.9338	up
Lmhn002140	C14H14O9	Feruloyltartaric acid (Fertaric acid)	Phenolic acids	Phenolic acids	-	B	9	9	9	9	4660700	2764100	2634400	3.35307e+06	1.48007	372563	18.5071	up
pmn001517	C15H22O8	3,4,5-Trimethoxyphenyl-1-O-Glucoside	Phenolic acids	Phenolic acids	-	B	2181400	4697800	1844800	2908000	8710700	9064200	6291100	8022000	1.27974	2.7586	1.46393	up
Lmtn000940	C14H18O10	1-O-(3,4-Dihydroxy-5-methoxy-benzoyl)-glucoside	Phenolic acids	Phenolic acids	-	B	9277.7	3968.4	6205.9	6484	14749	16861	16763	16124.3	1.32345	2.48679	1.31428	up
pmb3107	C15H20O10	Glucosyringic Acid	Phenolic acids	Phenolic acids	-	B	40717	29322	45952	38663.7	44077	96691	137440	92736	1.08841	2.39853	1.26215	up
Lmbp002309	C17H22O9	Sinapaldehyde-4-O-Glucoside	Phenolic acids	Phenolic acids	154461-65-1	B	19524	35337	31859	28906.7	73176	536500	385590	331755	1.27304	11.4768	3.52065	up
pmn001695	C16H20O10	Trihydroxycinnamoylquinic acid	Phenolic acids	Phenolic acids	-	B	85342	79753	71778	78957.7	224190	206940	172860	201330	1.455	2.54985	1.35041	up
mws0011	C17H24O9	Syringin	Phenolic acids	Phenolic acids	118-34-3	B	38911	37058	49991	41986.7	572180	1009800	549230	710403	1.4679	16.9197	4.08064	up
Lmtn002324	C19H28O11	Benzyl-(2''-O-glucosyl)glucoside	Phenolic acids	Phenolic acids	-	B	18663	6274.2	17638	14191.7	37096	23464	27686	29415.3	1.10138	2.07271	1.05152	up
pmb2654	C19H27NO12	Anthranilate-1-O-Sophoroside	Phenolic acids	Phenolic acids	-	B	189340	43215	63127	98560.7	312490	156680	174700	214623	1.02667	2.17758	1.12272	up
Zmhn002508	C21H28O12	4-p-Cumaroyl-rhamnosyl-(1→6)-D-glucose	Phenolic acids	Phenolic acids	-	B	9	9	9	9	39750	52453	3731.1	31978	1.45291	3553.11	11.7949	up
Zmhn004909	C21H18O13	3,4-Digalloylshikimic acid	Phenolic acids	Phenolic acids	-	B	13789	13883	15731	14467.7	115870	102740	71348	96652.7	1.4665	6.6806	2.73998	up
Lmnn002886	C23H26O11	1'-O-(3,4-Dihydroxyphenethyl)-O-caffeoyl-glucoside	Phenolic acids	Phenolic acids	-	B	3654400	3309100	3588700	3517400	30632000	21474000	15856000	22654000	1.45331	6.44055	2.68718	up
Hmln002149	C29H36O15	Acteoside	Phenolic acids	Phenolic acids	61276-17-3	B	9	9	11479	3832.33	13275	9541	11665	11493.7	1.06139	2.99913	1.58454	up
Cmsp004086	C16H14O6	Dihydrokaempferide	Flavonoids	Flavonols	137225-59-3	B	32542	28892	24411	28615	526750	314980	167910	336547	1.42753	11.7612	3.55596	up
mws0044	C15H12O7	Dihydroquercetin(Taxifolin)	Flavonoids	Dihydroflavonol	480-18-2	B	9	9	9	9	30992	27193	11147	23110.7	1.4777	2567.85	11.3263	up
mws2186	C20H18O11	Avicularin(Quercetin-3-O-α-L-arabinofuranoside)	Flavonoids	Flavonols	572-30-5	A	6415.3	4114.6	363.97	3631.29	2021500	618300	221300	953700	1.38057	262.634	8.03691	up
Lmdp003509	C20H18O11	Quercetin-3-O-xyloside (Reynoutrin)	Flavonoids	Flavonols	549-32-6	B	8058.6	7802.2	4769.7	6876.83	2526500	762260	364820	1217860	1.44166	177.096	7.46839	up
Hmcp002316	C21H20O11	Isorhamnetin-3-O-arabinoside	Flavonoids	Flavonols	-	A	48149	67177	68961	61429	853170	1160600	612720	875497	1.4648	14.2522	3.83311	up
mws0913	C21H20O11	Kaempferol-3-O-galactoside (Trifolin)	Flavonoids	Flavonols	23627-87-4	B	13955	30359	21714	22009.3	191690	125880	124680	147417	1.42497	6.69792	2.74371	up
HJN086	C21H22O11	Eriodictyol-3'-O-glucoside	Flavonoids	Dihydroflavone	-	B	9	9	1542.6	520.2	17200	9350.3	5731.6	10760.6	1.24908	20.6856	4.37055	up
mws1329	C21H20O12	Quercetin-7-O-glucoside*	Flavonoids	Flavonols	491-50-9	A	18287	19521	13370	17059.3	1697700	726790	656380	1.02696e+06	1.46154	60.1991	5.91167	up
mws0091	C21H20O12	Quercetin-3-O-glucoside (Isoquercitrin)*	Flavonoids	Flavonols	482-35-9	A	47499	24988	31777	34754.7	3077700	1189600	1273900	1.84707e+06	1.45795	53.1459	5.73189	up
mws0061	C21H20O12	Quercetin-3-O-galactoside (Hyperin)	Flavonoids	Flavonols	482-36-0	A	67859	45321	56894	56691.3	4843700	1841500	1941000	2875400	1.46019	50.7203	5.66449	up
Lmdp003286	C21H20O12	Isohyperoside	Flavonoids	Flavonols	35589-21-0	A	847470	972240	892050	903920	26260000	9475900	6042700	13926200	1.40446	15.4065	3.94546	up
Lmzp002365	C22H24O11	Hesperetin-7-O-glucoside	Flavonoids	Flavonoid	31712-49-9	B	103680	42212	76506	74132.7	974360	1316300	904850	1065170	1.45432	14.3684	3.84483	up
pme1598	C22H24O11	Hesperetin-5-O-glucoside	Flavonoids	Dihydroflavonol	69651-80-5	B	36217	24931	26674	29274	2741000	1382900	764750	1629550	1.45628	55.6654	5.79871	up
Xmsn002700	C21H22O12	Taxifolin-3'-O-glucoside	Flavonoids	Flavonoid	31106-05-5	B	9	9	9	9	67881	24052	22782	38238.3	1.47559	4248.7	12.0528	up
Lmmp003783	C21H18O13	Quercetin-3-O-glucuronide	Flavonoids	Flavonols	22688-79-5	B	110810	36439	90207	79152	4756500	4697400	3512000	4.32197e+06	1.46374	54.6034	5.77092	up
Lmfn003760	C21H18O13	Quercetin-4′-O-glucuronide	Flavonoids	Flavonols	201463-36-7	A	484820	422690	396430	434647	3594500	2719900	1860300	2724900	1.44963	6.26923	2.64829	up
Hmjp003123	C21H18O13	Quercetin-5-O-glucuronide	Flavonoids	Flavonols	-	B	1245100	863580	890610	999763	11353000	8410600	3516100	7759900	1.39348	7.76174	2.95638	up
Lmjp003044	C22H22O12	Isorhamnetin-3-O-Glucoside*	Flavonoids	Flavonols	5041-82-7	A	433840	408880	423280	422000	8450200	10174000	6486600	8.37027e+06	1.47756	19.8348	4.30996	up
Hmcp002207	C22H22O12	Isorhamnetin-7-O-glucoside (Brassicin)*	Flavonoids	Flavonols	6743-96-0	A	458300	380010	403490	413933	8509400	9651600	6467100	8.20937e+06	1.47764	19.8326	4.3098	up
Hmln002199	C23H22O13	Quercetin-3-O-(6''-acetyl)galactoside	Flavonoids	Flavonols	-	B	2966.2	1853.9	9	1609.7	67592	7041.6	14771	29801.5	1.03225	18.5137	4.21052	up
Li512111	C24H24O13	Isorhamnetin-3-O-(6''-acetylglucoside)	Flavonoids	Flavonols	-	B	2588.5	9	9	868.833	7755.1	4139.9	6345.6	6080.2	1.14248	6.99812	2.80697	up
Hmln002189	C24H22O15	Quercetin-3-O-(6''-malonyl)galactoside	Flavonoids	Flavonols	-	A	9	9	9	9	154400	19356	25417	66391	1.46355	7376.78	12.8488	up
HJAP064	C25H24O15	Isorhamnetin-3-O-(6''-malonylglucoside)	Flavonoids	Flavonoid	-	B	18891	10648	14363	14634	119370	56628	63814	79937.3	1.40486	5.46244	2.44955	up
Lmmp003306	C25H26O15	Quercetin-3-O-xylosyl(1→2)arabinoside	Flavonoids	Flavonols	-	A	32109	32363	36613	33695	1350600	1395700	1497800	1414700	1.47994	41.9855	5.39182	up
Zmxp005470	C26H26O15	Tricin-7-O-(6''-O-malonyl)glucoside	Flavonoids	Flavonoid	-	B	9	9	9	9	30219	18939	40047	29735	1.47668	3303.89	11.6899	up
Hmgp003641	C28H32O14	Chrysoeriol-6-C-rhamnoside-7-O-rhamnoside	Flavonoids	Flavonoid	-	B	12988	11137	16137	13420.7	46335	65920	62663	58306	1.45258	4.34449	2.11919	up
pmp001288	C28H32O14	Acacetin-7-O-rutinoside (Linarin)	Flavonoids	Flavonoid	480-36-4	A	442270	364960	454500	420577	1571300	2299800	2333700	2.06827e+06	1.45668	4.91769	2.29798	up
mws1290	C30H26O13	Kaempferol-3-O-(6''-p-Coumaroyl)glucoside (Tiliroside)	Flavonoids	Flavonols	20316-62-5	B	9	9	9	9	61914	81648	75571	73044.3	1.48022	8116.04	12.9866	up
Lmjp002596	C26H28O16	Quercetin-3-O-sambubioside	Flavonoids	Flavonols	83048-35-5	A	12071	26853	28696	22540	1277100	1691200	1562700	1.51033e+06	1.4669	67.0068	6.06624	up
Lmtp004044	C26H28O16	Quercetin-3-O-apiosyl(1→2)galactoside	Flavonoids	Flavonols	-	B	486360	520990	577600	528317	36182000	38139000	36845000	3.70553e+07	1.48043	70.1385	6.13213	up
Lmmp003091	C27H30O16	Quercetin-3-O-(4''-O-glucosyl)rhamnoside	Flavonoids	Flavonols	59262-54-3	B	5008.5	8681.6	7796	7162.03	267810	140220	179840	195957	1.46196	27.3605	4.77402	up
Lmsp004166	C27H30O16	Quercetin-3-O-glucoside-7-O-rhamnoside	Flavonoids	Flavonols	-	B	51296	36388	60012	49232	2888000	3555200	3076800	3.17333e+06	1.47854	64.4567	6.01026	up
mws0059	C27H30O16	Quercetin-3-O-rutinoside (Rutin)	Flavonoids	Flavonols	153-18-4	A	22462	18558	27701	22907	1539300	1365500	1443300	1.44937e+06	1.47935	63.2718	5.98349	up
Lmbp002336	C27H30O16	Quercetin-3-O-(2''-O-rhamnosyl)galactoside	Flavonoids	Flavonols	-	B	162950	111300	179410	151220	8716800	9624600	9991800	9444400	1.47814	62.4547	5.96474	up
Lmjp002461	C27H30O16	Quercetin-3-O-neohesperidoside	Flavonoids	Flavonols	117611-67-3	A	57211	41762	55138	51370.3	3211900	2848600	3083700	3.04807e+06	1.47938	59.3352	5.89082	up
Hmjp002999	C28H32O16	Isorhamnetin-3-O-rutinoside (Narcissin)	Flavonoids	Flavonoid	604-80-8	B	45029	108530	78898	77485.7	3932600	4737400	2189000	3.61967e+06	1.45911	46.714	5.54578	up
Zmxp002867	C28H32O16	Chrysoeriol-5,7-di-O-glucoside	Flavonoids	Flavonoid	-	B	31899	15636	58263	35266	213630	131050	132090	158923	1.33086	4.50642	2.17198	up
Lmsp004045	C28H32O16	Isorhamnetin-3-O-glucoside-7-O-rhamnoside	Flavonoids	Flavonols	-	A	1581.8	5311	4198.5	3697.1	13111	22721	29185	21672.3	1.3288	5.86198	2.55139	up
pme1540	C28H32O16	Isorhamnetin-3-O-neohesperidoside	Flavonoids	Flavonols	55033-90-4	A	5808.8	4753.5	2077.5	4213.27	24950	27518	23592	25353.3	1.3976	6.0175	2.58916	up
Lmtp003677	C27H30O17	Quercetin-3-O-sophoroside (Baimaside)	Flavonoids	Flavonols	18609-17-1	B	4618.2	9	9	1545.4	96100	61466	49597	69054.3	1.26477	44.6838	5.48168	up
Lmsp003729	C27H30O17	Myricetin-3-O-rutinoside	Flavonoids	Flavonols	-	B	9	9	9	9	208030	233110	389080	276740	1.47837	30748.9	14.9082	up
Hmlp002975	C28H30O17	Isorhamnetin-3-O-glucuronide-7-O-rhamnoside	Flavonoids	Flavonols	-	B	7448.2	13143	20425	13672.1	100860	337700	241310	226623	1.40655	16.5756	4.05099	up
Lmmp002560	C27H28O18	Quercetin-3-O-(2''-O-glucosyl)glucuronide	Flavonoids	Flavonols	-	B	9	9	9	9	171140	146950	116410	144833	1.48057	16092.6	13.9741	up
Hmcp001578	C28H32O17	Isorhamnetin-3,7-O-diglucoside	Flavonoids	Flavonols	6758-51-6	B	9	9	9	9	94839	73497	82040	83458.7	1.48012	9273.19	13.1788	up
Lmmp003266	C29H30O19	Quercetin-3-O-(2''-malonyl)glucoside-7-O-arabinoside	Flavonoids	Flavonols	-	A	9	9	9	9	62213	24699	40980	42630.7	1.47672	4736.74	12.2097	up
Xmyp004678	C32H38O19	Kaempferol-3-O-(2-O-Xylosyl-6-O-Rhamnosyl)Glucoside	Flavonoids	Flavonoid	-	A	9	9	9	9	132130	104560	60252	98980.7	1.47984	10997.9	13.4249	up
HJAP061	C32H38O20	Quercetin-3-O-(2''-O-arabinosyl)rutinoside	Flavonoids	Flavonols	-	A	87635	110380	108220	102078	2580200	3001800	3113700	2.89857e+06	1.47751	28.3955	4.82759	up
Hmcp001618	C32H38O20	Quercetin-3-O-(2''-O-Xylosyl)rutinoside	Flavonoids	Flavonols	129235-39-8	B	9	9	9	9	57041	60481	42230	53250.7	1.48073	5916.74	12.5306	up
Lnrp102163	C33H40O20	Quercetin-3-O-rutinoside-7-O-rhamnoside	Flavonoids	Flavonols	-	A	9	4601.2	2548.8	2386.33	36564	38499	31632	35565	1.08625	14.9036	3.89759	up
Hmcp001559	C33H40O20	Isorhamnetin-3-O-rutinoside-7-O-arabinoside	Flavonoids	Flavonols	-	B	9	9	9	9	9	5522.5	6825.6	4119.03	1.04151	457.67	8.83817	up
HJAP127	C33H40O20	Quercetin-3-O-(2''-O-Rhamnosyl)rutinoside	Flavonoids	Flavonols	55696-57-6	A	183240	127050	213780	174690	18992000	20721000	16026000	1.85797e+07	1.47929	106.358	6.73278	up
Hmcp001329	C32H38O21	Quercetin-3-O-xylosyl(1→2)glucosyl(1→2)glucoside	Flavonoids	Flavonols	-	A	9	9	9	9	69218	121410	128180	106269	1.47874	11807.7	13.5274	up
Lmyp003588	C35H28O20	Quercetin-3-O-(2'',6''-digalloyl)-glucoside	Flavonoids	Flavonols	-	B	21734	10690	14611	15678.3	654300	679840	604060	646067	1.47358	41.2076	5.36484	up
HJAP128	C34H42O20	Isorhamnetin-3-O-rutinoside-7-O-rhamnoside	Flavonoids	Flavonoid	-	A	154860	199240	283860	212653	908160	1824600	1472100	1401620	1.42548	6.5911	2.72052	up
HJAP023	C33H40O21	Kaempferol-6,8-di-C-glucoside-7-O-glucoside	Flavonoids	Flavonoid	-	B	9	9	9	9	28264	33360	51881	37835	1.47789	4203.89	12.0375	up
Hmcp001589	C34H42O21	Isorhamnetin-3-O-rutinoside-4'-O-glucoside	Flavonoids	Flavonols	111393-97-6	B	9	9	9	9	77359	125950	152080	118463	1.47847	13162.6	13.6842	up
Lmhp003162	C34H42O21	Chrysoeriol-6,8-di-C-glucoside-4'-O-glucoside	Flavonoids	Flavonoid	-	B	9	9	9	9	17662	41451	64307	41140	1.4728	4571.11	12.1583	up
Lmhp002374	C39H50O25	Quercetin-3-O-glucosyl(1→4)rhamnoside-7-O-rutinoside	Flavonoids	Flavonols	-	B	9	9	9	9	141210	67296	64886	91130.7	1.47859	10125.6	13.3057	up
HJAP123	C40H52O25	Isorhamnetin-3-O-rutinoside-7-O-rutinoside	Flavonoids	Flavonoid	-	A	2820.7	261.7	4422.7	2501.7	56248	89822	77793	74621	1.3585	29.8281	4.8986	up
mws4173	C11H10O4	5,7-Dimethoxycoumarin (Limettin)(Citropten)	Lignans and Coumarins	Coumarins	487-06-9	B	9	9	9	9	251740	316390	178720	248950	1.48065	27661.1	14.7556	up
Hmyp002656	C11H11NO4	Methyl dioxindole-3-acetate	Others	Others	57061-18-4	A	9573.9	4675.9	6557.3	6935.7	21841	16561	9387.4	15929.8	1.17812	2.29678	1.19961	up
mws1080	C12H22O11	Galactinol	Others	Saccharides and Alcohols	3687-64-7	A	1429900	349540	459630	746357	2051400	1687900	1419300	1.71953e+06	1.12482	2.3039	1.20408	up
mws5038	C12H22O11	Isomaltulose*	Others	Saccharides and Alcohols	13718-94-0	A	1105300	159120	419330	561250	1486000	1135300	1025800	1215700	1.01725	2.16606	1.11507	up
pme0519	C12H22O11	D-Sucrose*	Others	Saccharides and Alcohols	57-50-1	A	605660	190810	212560	336343	895510	835780	808190	846493	1.22078	2.51675	1.33156	up
mws5040	C12H21O11Na	Turanose	Others	Saccharides and Alcohols	547-25-1	B	436670	131850	245460	271327	603550	609790	547740	587027	1.17689	2.16354	1.1134	up
pme1137	C6H5NO3	6-Hydroxynicotinic acid	Alkaloids	Alkaloids	5006-66-6	B	32087	54367	27310	37921.3	132180	83059	42942	86060.3	1.04353	2.26944	1.18234	up
HJAP050	C19H21NO5	N-Feruloyl-3-methoxytyramine	Alkaloids	Phenolamine	78510-19-7	A	26347	25728	82848	44974.3	48173	257890	313710	206591	1.04866	4.59353	2.1996	up
mws1138	C24H26N2O13	Betanin (Betanidin-5-O-glucoside)	Alkaloids	Alkaloids	7659-95-2	B	2526.2	5640.2	3031.5	3732.63	49413	17899	5337	24216.3	1.12021	6.48773	2.69771	up
Lmsn006130	C36H56O12	2α,3β,19α-Trihydroxyurs-12-en-23,28-dioic acid-28-O-glucoside	Terpenoids	Triterpene	-	A	10315	9366.7	10224	9968.57	19495	29105	29544	26048	1.41913	2.61301	1.38571	up
pme3154	C6H12O4	Mevalonic acid	Organic acids	Organic acids	150-97-0	B	221800	280300	478620	326907	386770	964220	1011800	787597	1.09542	2.40924	1.26858	up
Zmjn001813	C7H12O4	Pimelic acid*	Organic acids	Organic acids	111-16-0	B	20967	31784	19466	24072.3	132640	48714	49176	76843.3	1.21761	3.19218	1.67454	up
pme3186	C3H7O6P	DL-Glyceraldehyde-3-phosphate	Organic acids	Organic acids	591-59-3	B	17899	41277	25667	28281	43789	94602	67801	68730.7	1.18945	2.43028	1.28112	up
mws5045	C12H24O3	12-Hydroxydodecanoic acid	Lipids	Free fatty acids	505-95-3	A	2488.7	1311.2	1777.5	1859.13	5147.3	6544.7	6778	6156.67	1.40741	3.31158	1.72752	up
Hmbp003234	C12H14O6	1-O-Caffeoylglycerol	Lipids	Glycerol ester	-	B	44518	26299	52185	41000.7	131790	64276	53973	83346.3	1.05405	2.0328	1.02347	up
