# Supplementary material for: Elucidating the Differentiation Synthesis Mechanisms of Differently Colored Resistance Quinoa Seedings Using Metabolite Profiling and Transcriptome Analysis
Source: Metabolites. 2023 Oct 10;13(10):1065. doi: 10.3390/metabo13101065 (PMC10609267; doi:10.3390/metabo13101065)
Supplement: Supplementary file 1 [file metabolites-13-01065-s001.zip › Table S12.xlsx]

## Sheet: Sheet1
Table S12 Significantly different metabolites in R-WvsR-B
Index	Formula	Compounds	Class I	Class II	CAS	Level	R-W1	R-W2	R-W3	R-W average	R-B1	R-B2	R-B3	R-B average	VIP	Fold_Change	Log2FC	Type
pme3017	C4H9NO2	2-Aminoisobutyric acid	Amino acids and derivatives	Amino acids and derivatives	62-57-7	B	2459900	4501300	3770400	3577200	1720400	690670	570290	993787	1.26297	0.277811	-1.84782	down
Lmbp000123	C6H13NO2S	L-Homomethionine	Amino acids and derivatives	Amino acids and derivatives	25148-30-5	B	87365	155730	295490	179528	20514	77809	78354	58892.3	1.02675	0.328039	-1.60806	down
pmb0468	C6H11NO3S	N-Formyl-L-Methionine	Amino acids and derivatives	Amino acids and derivatives	4289-98-9	B	125610	158680	126840	137043	11979	17875	15185	15013	1.43693	0.109549	-3.19035	down
Lmrj001698	C9H18N2O4	L-Seryl-L-Isoleucine	Amino acids and derivatives	Amino acids and derivatives	91086-51-0	A	124540	503900	1340800	656413	111770	79194	52642	81202	1.10159	0.123706	-3.01502	down
pme1228	C11H12N2O3	5-Hydroxy-L-tryptophan	Amino acids and derivatives	Amino acids and derivatives	56-69-9	A	10651	11053	8836.6	10180.2	9	9	9	9	1.44709	0.000884069	-10.1436	down
Lmhp001670	C11H22N2O3	L-Valyl-L-Leucine	Amino acids and derivatives	Amino acids and derivatives	3989-97-7	B	244170	1005300	1683300	977590	184510	135920	138000	152810	1.1626	0.156313	-2.67749	down
mws4176	C12H16N2O3	L-Alanyl-L-Phenylalanine	Amino acids and derivatives	Amino acids and derivatives	3061-90-3	B	30228	102840	158440	97169.3	18609	14108	8707	13808	1.2314	0.142102	-2.815	down
Lmhp002031	C12H24N2O3	L-Leucyl-L-Leucine	Amino acids and derivatives	Amino acids and derivatives	3303-31-9	B	129580	501820	795810	475737	105570	117500	97374	106815	1.0847	0.224525	-2.15505	down
Lmhp002001	C14H20N2O3	L-Valyl-L-Phenylalanine	Amino acids and derivatives	Amino acids and derivatives	3918-92-1	B	97327	273850	372230	247802	52632	60922	45324	52959.3	1.24241	0.213716	-2.22623	down
pme2890	C8H16N2O4S2	L-Homocystine	Amino acids and derivatives	Amino acids and derivatives	626-72-2	B	6025.6	15571	20820	14138.9	3472.7	3313.7	4596.6	3794.33	1.21612	0.268362	-1.89775	down
mws5035	C15H22N2O3	L-Leucyl-L-phenylalanine	Amino acids and derivatives	Amino acids and derivatives	56217-82-4	B	131480	421980	442210	331890	59438	39152	47683	48757.7	1.31583	0.146909	-2.767	down
mws0636	C18H20N2O3	L-Phenylalanyl-L-phenylalanine	Amino acids and derivatives	Amino acids and derivatives	2577-40-4	A	21526	57554	44436	41172	12060	8418	6322.5	8933.5	1.31141	0.21698	-2.20437	down
Hmgn001653	C7H6O3	Protocatechualdehyde*	Phenolic acids	Phenolic acids	139-85-5	B	1115500	4404100	1593600	2.37107e+06	220500	340290	184220	248337	1.33767	0.104736	-3.25517	down
mws0749	C7H6O3	4-Hydroxybenzoic acid	Phenolic acids	Phenolic acids	99-96-7	B	1048900	4082100	1417300	2.18277e+06	188580	369970	234240	264263	1.32069	0.121068	-3.04611	down
Lmbn001981	C7H6O3	2,5-Dihydroxybenzaldehyde*	Phenolic acids	Phenolic acids	1194-98-5	B	1085400	4246800	1480900	2.27103e+06	132760	313460	210040	218753	1.33493	0.0963233	-3.37597	down
pme3083	C8H7NO3	2-(Formylamino)benzoic acid	Phenolic acids	Phenolic acids	3342-77-6	B	191890	435020	466040	364317	121410	86340	96656	101469	1.29679	0.278518	-1.84416	down
pme0281	C8H6O4	Terephthalic acid	Phenolic acids	Phenolic acids	100-21-0	A	634870	908490	618890	720750	338810	429710	117260	295260	1.1104	0.409657	-1.28751	down
NK10253223	C8H9NO3	2-Amino-3-methoxybenzoic acid	Phenolic acids	Phenolic acids	3177-80-8	B	231680	230530	226930	229713	90668	132970	80014	101217	1.3541	0.440625	-1.18238	down
mws0028	C8H8O4	Vanillic acid	Phenolic acids	Phenolic acids	121-34-6	B	47760	393660	83122	174847	10887	26231	18950	18689.3	1.18627	0.106889	-3.22581	down
Hmbp001276	C8H8O4	Gallacetophenone	Phenolic acids	Phenolic acids	528-21-2	B	125800	132080	97885	118588	12513	27598	11335	17148.7	1.38563	0.144607	-2.78979	down
Lmhn003240	C11H10O6	Benzoylmalic acid	Phenolic acids	Phenolic acids	22138-51-8	A	6374300	15692000	7624100	9896800	53632	158990	77186	96602.7	1.42525	0.009761	-6.67876	down
pmn001669	C12H14O5	Methyl sinapate	Phenolic acids	Phenolic acids	20733-94-2	A	9778	5232.2	3164.9	6058.37	3299.5	1600.8	2354.5	2418.27	1.08254	0.399161	-1.32496	down
Lmhn003373	C11H10O7	p-Hydroxybenzoylmalic acid	Phenolic acids	Phenolic acids	-	B	502780	1311600	462440	758940	12438	56891	18604	29311	1.37373	0.038621	-4.69447	down
pme3472	C12H16O7	Arbutin	Phenolic acids	Phenolic acids	497-76-7	B	106980	221360	95393	141244	26051	84458	19898	43469	1.13848	0.307757	-1.70013	down
pmn001690	C16H24O7	3-Hydroxy-4-isopropylbenzylalcohol-3-O-glucoside	Phenolic acids	Phenolic acids	-	B	155370	244830	199310	199837	26697	23466	29140	26434.3	1.43538	0.13228	-2.91834	down
Lmmn003663	C14H18O9	5-Glucosyloxy-2-Hydroxybenzoic acid methyl ester	Phenolic acids	Phenolic acids	-	B	61872	77926	53027	64275	14838	11824	4918.6	10526.9	1.3536	0.163779	-2.61018	down
Zmhn001883	C14H18O9	Vanillic acid-4-O-glucoside	Phenolic acids	Phenolic acids	32142-31-7	B	37299	29741	39965	35668.3	2519.2	12072	2064.8	5552	1.27464	0.155656	-2.68356	down
Hmmn002544	C16H20O9	Ferulic acid-4-O-glucoside	Phenolic acids	Phenolic acids	117405-51-3	A	268030	239380	393150	300187	85275	83404	156910	108530	1.2964	0.361541	-1.46777	down
Zmhn002334	C16H20O9	6-O-Feruloyl-D-glucose	Phenolic acids	Phenolic acids	137887-25-3	B	2723400	1760300	1617800	2.03383e+06	1400100	425170	836560	887277	1.11818	0.436258	-1.19675	down
pma3724	C17H20O9	1-O-Feruloylquinic acid	Phenolic acids	Phenolic acids	-	B	433530	332470	350590	372197	137450	136080	72589	115373	1.34747	0.309979	-1.68976	down
pmb0752	C17H20O9	3-O-Feruloylquinic acid	Phenolic acids	Phenolic acids	1899-29-2	B	704710	437310	480960	540993	190280	143250	146390	159973	1.3889	0.295703	-1.75778	down
pmn001707	C30H46O5	Quillaic acid	Phenolic acids	Phenolic acids	631-01-6	B	1157500	1313400	2235100	1.56867e+06	709650	606650	278150	531483	1.20806	0.338812	-1.56144	down
Hmbn002692	C22H30O14	6'-O-Feruloyl-D-sucrose	Phenolic acids	Phenolic acids	118230-77-6	B	1051500	592530	527920	723983	280350	204800	363650	282933	1.25422	0.390801	-1.35549	down
pme3200	C2H7N3	1-methylguanidine	Nucleotides and derivatives	Nucleotides and derivatives	471-29-4	B	51021	107940	59709	72890	9	9	9	9	1.4463	0.000123474	-12.9835	down
mws0255	C4H5N3O	Cytosine	Nucleotides and derivatives	Nucleotides and derivatives	71-30-7	B	2021600	4700000	3757000	3.49287e+06	645670	2018100	787670	1150480	1.16495	0.32938	-1.60218	down
pme0040	C5H5N5	Adenine	Nucleotides and derivatives	Nucleotides and derivatives	73-24-5	A	10931000	31275000	37704000	2.66367e+07	8318200	9646500	5941000	7.96857e+06	1.15349	0.299158	-1.74102	down
pme1109	C5H5N5O	Guanine	Nucleotides and derivatives	Nucleotides and derivatives	73-40-5	A	301260	986570	1152000	813277	82685	141760	124000	116148	1.29431	0.142815	-2.80778	down
ML10180524	C9H13N3O5	Cytarabine	Nucleotides and derivatives	Nucleotides and derivatives	147-94-4	B	235430	906380	755690	632500	151450	247660	144390	181167	1.12646	0.28643	-1.80375	down
Lmqp000329	C8H14N3O7P	5-Aminoimidazole ribonucleotide	Nucleotides and derivatives	Nucleotides and derivatives	25635-88-5	A	1009000	1055600	614780	893127	75364	159300	35556	90073.3	1.3491	0.100852	-3.30969	down
pme3188	C9H13N2O9P	Uridine 5'-monophosphate	Nucleotides and derivatives	Nucleotides and derivatives	58-97-9	B	125790	239210	647990	337663	25593	13918	40518	26676.3	1.30592	0.0790028	-3.66195	down
mws0675	C11H15N2O8P	β-Nicotinamide mononucleotide	Nucleotides and derivatives	Nucleotides and derivatives	1094-61-7	B	250030	970870	473850	564917	214550	124040	74499	137696	1.17209	0.243746	-2.03655	down
mws0609	C10H12N5O7P	Guanosine 3',5'-cyclic monophosphate	Nucleotides and derivatives	Nucleotides and derivatives	7665-99-8	A	108420	178080	293450	193317	67850	60992	83486	70776	1.21038	0.366114	-1.44963	down
pmb0998	C10H14N5O8P	Guanosine 5'-monophosphate	Nucleotides and derivatives	Nucleotides and derivatives	85-32-5	A	100150	405720	412080	305983	60168	59868	84534	68190	1.17685	0.222855	-2.16582	down
pme0376	C15H12O5	Naringenin (5,7,4'-Trihydroxyflavanone)	Flavonoids	Dihydroflavone	480-41-1	A	71031	78951	64544	71508.7	18388	20735	13433	17518.7	1.41793	0.244987	-2.02923	down
mws1068	C15H10O6	Kaempferol (3,5,7,4'-Tetrahydroxyflavone)	Flavonoids	Flavonols	520-18-3	A	746400	726760	862770	778643	53857	117310	39156	70107.7	1.39332	0.0900382	-3.47332	down
mws1094	C15H12O6	Aromadendrin (Dihydrokaempferol)	Flavonoids	Dihydroflavonol	480-20-6	B	23530	27563	20730	23941	1860.7	6093.9	3375.9	3776.83	1.36087	0.157756	-2.66423	down
Lmbp003668	C20H18O10	Kaempferol-3-O-arabinoside	Flavonoids	Flavonoid	-	B	1480300	2128100	1318200	1642200	34838	231450	23901	96729.7	1.3242	0.0589025	-4.08553	down
mws0919	C21H20O10	Kaempferol-3-O-rhamnoside (Afzelin)	Flavonoids	Flavonols	482-39-3	A	37332	63849	52065	51082	9	14293	2277.1	5526.37	1.00715	0.108186	-3.20841	down
pme0321	C21H20O10	Kaempferol-7-O-rhamnoside	Flavonoids	Flavonols	20196-89-8	B	33407	32975	26933	31105	2351.2	12535	2499.6	5795.27	1.26023	0.186313	-2.4242	down
mws2209	C21H20O11	Kaempferol-3-O-glucoside (Astragalin)	Flavonoids	Flavonols	480-10-4	B	6709400	10585000	12832000	1.00421e+07	838540	1912000	536930	1.09582e+06	1.35406	0.109123	-3.19598	down
Hmpp003270	C21H20O11	Luteolin-4'-O-glucoside	Flavonoids	Flavonoid	6920-38-3	A	9270900	12800000	11176000	11082300	889790	2204300	657530	1250540	1.37181	0.112841	-3.14763	down
Lmlp003531	C21H20O11	Luteolin-3'-O-glucoside	Flavonoids	Flavonoid	5154-41-6	A	7955800	11524000	12408000	1.06293e+07	744970	1873300	613250	1.07717e+06	1.37696	0.10134	-3.30272	down
Lmtn002796	C21H22O11	Aromadendrin-7-O-glucoside	Flavonoids	Flavonoid	28189-90-4	B	603880	535660	550250	563263	80780	94139	86709	87209.3	1.44319	0.154829	-2.69126	down
Lmmn004625	C21H22O11	Dihydrokaempferol-7-O-glucoside	Flavonoids	Flavonols	-	B	40412	36211	23649	33424	9	9	9	9	1.44655	0.000269268	-11.8587	down
Lmzn001894	C21H18O12	Kaempferol-3-O-glucuronide	Flavonoids	Flavonols	22688-78-4	A	5085600	4329600	5181000	4865400	387310	606790	416200	470100	1.43182	0.096621	-3.37152	down
mws4167	C21H18O12	Luteolin-7-O-glucuronide	Flavonoids	Flavonoid	29741-10-4	A	17339000	16565000	15231000	1.63783e+07	1368600	1799200	1457700	1.54183e+06	1.44218	0.0941386	-3.40907	down
Lmmp003767	C21H18O12	Kaempferol-7-O-glucuronide	Flavonoids	Flavonols	-	B	22636000	22412000	31812000	25620000	9989500	13857000	10204000	1.13502e+07	1.33881	0.44302	-1.17456	down
HJAP135	C24H24O12	Pinocembrin-7-O-(6''-O-malonyl)glucoside	Flavonoids	Flavonoid	-	A	3318300	2226000	2306100	2616800	478060	2302900	634510	1138490	1.0436	0.43507	-1.20068	down
pmp000587	C24H22O14	Luteolin-7-O-(6''-malonyl)glucoside	Flavonoids	Flavonoid	-	A	17920	11612	24509	18013.7	9	9	9	9	1.44243	0.000499621	-10.9669	down
Lmdp004892	C24H22O14	Kaempferol-3-O-(6''-malonyl)galactoside	Flavonoids	Flavonols	-	A	2022500	2663000	3069300	2.58493e+06	28795	1320900	42974	464223	1.12308	0.179588	-2.47724	down
HJAP148	C26H28O15	Kaempferol-3-O-sambubioside	Flavonoids	Flavonoid	27661-51-4	A	17980000	15097000	15332000	1.61363e+07	978140	904230	1788500	1.22362e+06	1.42918	0.0758303	-3.72108	down
Hmjn004446	C30H26O13	Luteolin-7-O-(6''-caffeoyl)rhamnoside	Flavonoids	Flavonoid	-	B	596500	622230	914860	711197	43052	150390	73694	89045.3	1.35784	0.125205	-2.99764	down
Lmsp004670	C27H30O15	Kaempferol-3-O-glucoside-7-O-rhamnoside	Flavonoids	Flavonols	-	A	2012700	1668700	1729600	1.80367e+06	623410	969740	781200	791450	1.36838	0.438801	-1.18836	down
Lmsn002815	C27H30O15	Kaempferol-3-O-rutinoside(Nicotiflorin)*	Flavonoids	Flavonoid	17650-84-9	A	3995000	4965400	5280600	4747000	1365500	2090200	2504400	1986700	1.32421	0.418517	-1.25664	down
Zmcp003989	C27H30O15	Kaempferol-3-O-rhamnosyl(1→2)glucoside	Flavonoids	Flavonoid	-	A	1001900	1309500	938900	1.08343e+06	44181	67839	34199	48739.7	1.43184	0.0449863	-4.47437	down
Hmjp003008	C27H28O16	Luteolin-7-O-glucuronide-5-O-rhamnoside	Flavonoids	Flavonoid	-	A	13013000	19432000	18961000	1.71353e+07	1885300	2808600	2007200	2233700	1.42376	0.130356	-2.93947	down
pmp001080	C28H32O15	Diosmetin-7-O-Neohesperidoside (Neodiosmin)	Flavonoids	Flavonoid	38665-01-9	B	123100	204460	153660	160407	35565	69047	30785	45132.3	1.32226	0.281362	-1.8295	down
Zmlp003063	C33H40O19	Luteolin-7-O-(2''-O-rhamnosyl)rutinoside	Flavonoids	Flavonoid	-	B	1478400	1940800	1648200	1.68913e+06	54617	83577	35151	57781.7	1.42833	0.0342079	-4.86953	down
Lmsp003881	C33H40O19	Kaempferol-3-O-rutinoside-7-O-rhamnoside	Flavonoids	Flavonols	-	A	34079000	44712000	36298000	38363000	1986500	3557000	1648700	2397400	1.42387	0.0624925	-4.00017	down
Hmqp002870	C32H38O20	Luteolin-7-O-Sophoroside-5-O-arabinoside	Flavonoids	Flavonoid	-	B	1916500	2723300	1748500	2.12943e+06	81406	161400	54767	99191	1.41255	0.0465809	-4.42412	down
Lmyp003857	C35H28O19	Kaempferol-3-O-(2'',6''-digalloyl)glucoside	Flavonoids	Flavonoid	-	B	918740	775950	832610	842433	254090	377010	286800	305967	1.40017	0.363194	-1.46119	down
pmp001105	C33H40O20	Kaempferol-3-O-neohesperidoside-7-O-glucoside	Flavonoids	Flavonols	-	A	63572	140880	128080	110844	23542	13789	51384	29571.7	1.22527	0.266786	-1.90624	down
pmb0676	C38H40O19	Chrysoeriol-8-C-glucoside-7-O-(6''-feruloyl)glucoside	Flavonoids	Flavonoid carbonoside	-	B	363060	271740	246270	293690	45635	37014	45818	42822.3	1.4342	0.145808	-2.77786	down
Lmgp003270	C16H16O10	Scopoletin-7-O-glucuronide	Lignans and Coumarins	Coumarins	132752-65-9	B	413960	257540	216220	295907	82367	99306	60516	80729.7	1.35079	0.272821	-1.87397	down
Rfmb25702	C28H34O12	Pinoresinol-4-O-(6''-acetyl)glucoside	Lignans and Coumarins	Lignans	-	B	69866	77697	134320	93961	12264	47544	7926	22578	1.18001	0.240291	-2.05714	down
Rfmb26201	C30H38O14	Syringaresinol-4'-O-(6''-acetyl)glucoside	Lignans and Coumarins	Lignans	-	B	75200	35905	75406	62170.3	6616.5	17996	11102	11904.8	1.30703	0.191487	-2.38468	down
pmn001368	C32H44O17	Olivil-4,4'-Di-O-glucoside	Lignans and Coumarins	Lignans	-	B	126340	184070	181520	163977	56744	45499	57967	53403.3	1.40303	0.325676	-1.61849	down
pmp000509	C6H6O3	Maltol	Others	Others	118-71-8	B	196710	243050	274520	238093	58213	67571	55135	60306.3	1.42387	0.253289	-1.98115	down
Zmjp000624	C8H9NO3	Pyridoxal	Others	Vitamin	66-72-8	A	226490	240270	229040	231933	116980	151530	79029	115846	1.27472	0.499481	-1.0015	down
pme0516	C6H12O6	Inositol	Others	Saccharides and Alcohols	87-89-8	B	214400	199450	175840	196563	64385	111060	83292	86245.7	1.34386	0.438768	-1.18847	down
mws4174	C8H15NO6	N-Acetyl-D-mannosamine	Others	Saccharides and Alcohols	7772-94-3	B	32381	63148	49318	48282.3	16316	16840	26875	20010.3	1.26268	0.414444	-1.27075	down
mws2608	C8H15NO6	N-Acetyl-D-galactosamine	Others	Saccharides and Alcohols	1811-31-0	B	26771	32087	32270	30376	11162	7546.2	16073	11593.7	1.32713	0.381674	-1.38959	down
pma3101	C11H14NO6+	Nicotinate D-ribonucleoside	Others	Vitamin	17720-18-2	B	519270	1818100	1995400	1.44426e+06	415140	429740	432410	425763	1.12216	0.294798	-1.7622	down
pme3163	C7H15O10P	D-Sedoheptuiose 7-phosphate	Others	Saccharides and Alcohols	2646-35-7	B	1391300	877810	1468400	1.24584e+06	594410	671060	512010	592493	1.27712	0.475579	-1.07224	down
pmb0789	C14H21NO8	Pyridoxine-5'-O-glucoside	Others	Vitamin	-	B	486820	485050	522610	498160	192060	250120	229680	223953	1.41533	0.449561	-1.15341	down
pmb0484	C5H13NO	Choline	Alkaloids	Alkaloids	62-49-7	B	20851000	28952000	26763000	25522000	16618000	7203200	5506500	9775900	1.21117	0.383038	-1.38444	down
mws0005	C10H12N2	Tryptamine	Alkaloids	Plumerane	61-54-1	A	9835200	23290000	13673000	15599400	622890	1305300	769120	899103	1.41048	0.057637	-4.11686	down
pmb0774	C10H12N2O	N-Hydroxytryptamine*	Alkaloids	Phenolamine	-	A	4116600	4784500	3845200	4.24877e+06	237660	463180	400580	367140	1.42731	0.086411	-3.53264	down
pme2024	C10H12N2O	Serotonin*	Alkaloids	Plumerane	50-67-9	A	5173200	5863800	4746000	5261000	255240	561950	490510	435900	1.42059	0.082855	-3.59327	down
mws0983	C20H39NO2	N-Oleoylethanolamine	Alkaloids	Alkaloids	111-58-0	B	34456	81635	84716	66935.7	28481	33859	26513	29617.7	1.12063	0.44248	-1.17632	down
pmb0776	C20H20N2O3	N-Feruloyltryptamine	Alkaloids	Phenolamine	53905-13-8	A	11837	12252	15735	13274.7	1379.6	2200.3	1038.1	1539.33	1.40843	0.11596	-3.1083	down
Lmlp003024	C20H30O7N4	N'-p-Coumaroylagmatine-glucoside	Alkaloids	Phenolamine	-	B	84348	76584	160070	107001	10420	9	9	3479.33	1.19536	0.0325169	-4.94267	down
pmb0492	C34H37N3O6	N',N'',N'''-p-Coumaroyl-cinnamoyl-caffeoyl spermidine	Alkaloids	Phenolamine	-	B	88056	250620	238820	192499	79690	98413	52834	76979	1.06529	0.399894	-1.32231	down
Lmsn012425	C30H48O4	Rubusic acid (3β,7α-Dihydroxyolean-12-en-28-oic acid)	Terpenoids	Triterpene	23984-26-1	A	5002.5	25951	21727	17560.2	1991.1	679.05	1190.7	1286.95	1.3049	0.073288	-3.77028	down
Lmmn004145	C38H60O10	3-O-(2-O-Acetyl-glucosyl)oleanolic acid	Terpenoids	Triterpene	-	A	8279200	14132000	13660000	1.20237e+07	4118700	3912000	1448400	3159700	1.26588	0.262789	-1.92803	down
pmn001505	C41H64O13	Oleanolic acid-3-O-xylosyl(1→3)glucuronide	Terpenoids	Triterpene	-	A	56503	149810	121710	109341	35077	24608	8953.1	22879.4	1.2265	0.209248	-2.25672	down
mws0208	C6H10O4	Adipic Acid*	Organic acids	Organic acids	124-04-9	B	1136800	1605000	827540	1189780	370050	437150	225650	344283	1.32602	0.289367	-1.78903	down
Lmbn001609	C6H10O4	2-Acetyl-2-Hydroxybutanoic Acid	Organic acids	Organic acids	-	B	165610	226710	121710	171343	59371	61833	33491	51565	1.32628	0.300945	-1.73243	down
mws0924	C6H10O4	2-Methylglutaric acid*	Organic acids	Organic acids	617-62-9	B	985410	1429400	701710	1038840	353640	444390	220110	339380	1.28728	0.326691	-1.614	down
mws0344	C5H10O6	D-Xylonic acid	Organic acids	Organic acids	526-91-0	A	4037500	5216700	4517500	4.59057e+06	1212000	2501800	944840	1552880	1.27977	0.338276	-1.56373	down
mws0242	C8H14O4	Suberic Acid	Organic acids	Organic acids	505-48-6	B	151460	162920	75910	130097	44867	34302	31638	36935.7	1.33606	0.283909	-1.8165	down
Zmtn001464	C10H7NO4	4,8-Dihydroxyquinoline-2-carboxylic acid	Organic acids	Organic acids	59-00-7	B	59538	50254	39310	49700.7	26573	16347	9467.9	17462.6	1.25187	0.351356	-1.50899	down
Lmmn003323	C16H32O3	2-Hydroxyhexadecanoic acid	Organic acids	Organic acids	764-67-0	B	159900	414110	316050	296687	105840	115730	136230	119267	1.19745	0.401995	-1.31475	down
mws0120	C8H20NO6P	Choline Alfoscerate	Lipids	PC	28319-77-9	B	418570	449420	281720	383237	46582	68423	25115	46706.7	1.38406	0.121874	-3.03654	down
Lmbn006152	C18H32O2	(9Z,11E)-Octadecadienoic acid	Lipids	Free fatty acids	2540-56-9	B	22335	29359	33619	28437.7	15016	13073	10986	13025	1.34369	0.458019	-1.12652	down
Zmyn004548	C18H28O3	12-Oxo-phytodienoic acid	Lipids	Free fatty acids	85551-10-6	B	3693.5	8749.9	11500	7981.13	4301	1986.4	2679.9	2989.1	1.08498	0.374521	-1.41688	down
pmb2786	C18H30O3	9-Hydroxy-10,12,15-octadecatrienoic acid*	Lipids	Free fatty acids	89886-42-0	B	9605.4	18656	22042	16767.8	7995.5	6650.3	8035.1	7560.3	1.18316	0.450882	-1.14918	down
Lmbn005443	C18H30O3	13-KODE; (9Z,11E)-13-Oxooctadeca-9,11-dienoic acid*	Lipids	Free fatty acids	54739-30-9	B	10353	19078	19285	16238.7	9070.4	5687.4	8807	7854.93	1.18113	0.483718	-1.04776	down
Lmhp011562	C21H36O4	1-α-Linolenoyl-glycerol	Lipids	Glycerol ester	-	A	3437400	7829600	5664300	5.64377e+06	2286900	940710	1219100	1.48224e+06	1.287	0.262633	-1.92888	down
Lmhp011388	C21H36O4	2-α-Linolenoyl-glycerol	Lipids	Glycerol ester	55268-58-1	A	1447000	3596300	2610300	2551200	978920	392400	501210	624177	1.28024	0.24466	-2.03115	down
Lmhp012042	C21H38O4	2-Linoleoylglycerol	Lipids	Glycerol ester	3443-82-1	A	504830	864500	544690	638007	204840	129370	121300	151837	1.38024	0.237986	-2.07105	down
Lmhp112042	C21H38O4	1-Linoleoylglycerol	Lipids	Glycerol ester	2277-28-3	A	519880	867700	555620	647733	212270	134650	135910	160943	1.38544	0.248472	-2.00885	down
pmb0296	C21H40O4	1-Oleoyl-Sn-Glycerol	Lipids	Glycerol ester	129784-87-8	A	383860	499580	759230	547557	188030	164630	95801	149487	1.31397	0.273007	-1.87299	down
Lmhp008337	C19H40NO7P	LysoPE 14:0(2n isomer)	Lipids	LPE	-	B	13347	44099	19165	25537	9543.7	2923.6	3144.1	5203.8	1.22564	0.203775	-2.29495	down
pmb0864	C19H40NO7P	LysoPE 14:0	Lipids	LPE	-	B	56088	233240	96071	128466	40734	13343	10102	21393	1.21611	0.166526	-2.58618	down
Lmhp008440	C20H40NO7P	LysoPE 15:1	Lipids	LPE	-	A	2219.3	9963.5	5030.8	5737.87	1910.6	9	9	642.867	1.12187	0.112039	-3.15792	down
Lmhp008273	C20H40NO7P	LysoPE 15:1(2n isomer)	Lipids	LPE	-	B	706.12	2973.4	927.71	1535.74	9	9	9	9	1.42914	0.00586035	-7.4148	down
Lmhp009187	C20H42NO7P	LysoPE 15:0	Lipids	LPE	-	A	41224	113640	70903	75255.7	19567	11683	8179.7	13143.2	1.3234	0.174648	-2.51748	down
Lmhp008885	C20H42NO7P	LysoPE 15:0(2n isomer)	Lipids	LPE	-	A	7691	20299	14066	14018.7	5008	2172	1664.7	2948.23	1.27295	0.210308	-2.24943	down
Lmhp007836	C21H38NO7P	LysoPE 16:3	Lipids	LPE	-	A	26683	56733	42348	41921.3	33180	14830	7627.5	18545.8	1.01599	0.442396	-1.17659	down
Lmhp009034	C21H42NO7P	LysoPE 16:1	Lipids	LPE	-	A	108180	331840	147740	195920	91117	73391	24138	62882	1.0723	0.320958	-1.63955	down
pmd0160	C21H44NO7P	LysoPE 16:0(2n isomer)	Lipids	LPE	-	A	1236400	4181300	2122200	2513300	924940	288270	297060	503423	1.22939	0.200304	-2.31974	down
pmb0876	C21H44NO7P	LysoPE 16:0	Lipids	LPE	53862-35-4	A	5161700	19769000	10975000	1.19686e+07	3833400	1268900	1263400	2121900	1.23705	0.177289	-2.49582	down
Lmhp009464	C22H44NO7P	LysoPE 17:1(2n isomer)	Lipids	LPE	-	A	17111	61212	35163	37828.7	11667	5341.7	4331.8	7113.5	1.25587	0.188045	-2.41085	down
Lmhp009769	C22H44NO7P	LysoPE 17:1	Lipids	LPE	-	A	18614	63149	32045	37936	13811	5006.4	4678.9	7832.1	1.23281	0.206456	-2.2761	down
pmd0130	C22H46NO7P	LysoPC 14:0	Lipids	LPC	20559-16-4	A	35273	65416	38841	46510	29488	16562	8081.2	18043.7	1.1266	0.387954	-1.36604	down
Lmhp008233	C23H40NO7P	LysoPE 18:4	Lipids	LPE	-	A	3035.4	7087.9	4909.7	5011	2976.4	1240.7	966.08	1727.73	1.16406	0.344787	-1.53622	down
Lmhp008801	C23H42NO7P	LysoPE 18:3	Lipids	LPE	-	A	1967200	6253700	2760600	3660500	2318500	1232300	683050	1.41128e+06	1.01318	0.385544	-1.37503	down
pmb0874	C23H44NO7P	LysoPE 18:2(2n isomer)	Lipids	LPE	-	A	11036000	31849000	20624000	2.11697e+07	12314000	9429700	3150100	8.29793e+06	1.00014	0.391973	-1.35117	down
pmb0881	C23H44NO7P	LysoPE 18:2	Lipids	LPE	-	A	6543400	17049000	8785200	1.07925e+07	5814700	3138800	1545200	3.49957e+06	1.13039	0.324258	-1.62479	down
pmb2260	C23H46NO7P	LysoPC 15:1	Lipids	LPC	-	A	7239.5	26033	10985	14752.5	4422.7	3193.8	2149.6	3255.37	1.24236	0.220665	-2.18007	down
mws0289	C23H46NO7P	LysoPE 18:1	Lipids	LPE	89576-29-4	A	1217600	2661400	2137500	2005500	1343700	645730	644750	878060	1.13162	0.437826	-1.19157	down
pmb0883	C23H48NO7P	LysoPE 18:0	Lipids	LPE	69747-55-3	A	24472	89637	44725	52944.7	18207	8694.3	7038.2	11313.2	1.22917	0.213679	-2.22648	down
pmb2319	C23H48NO7P	LysoPC 15:0	Lipids	LPC	108273-89-8	A	87974	179680	119830	129161	46934	43338	29143	39805	1.32778	0.30818	-1.69815	down
pmb0880	C23H48NO7P	LysoPE 18:0(2n isomer)	Lipids	LPE	-	A	15746	34022	28745	26171	16506	8009.1	7614.3	10709.8	1.15899	0.409224	-1.28904	down
Lmhp009129	C23H48NO7P	LysoPC 15:0(2n isomer)	Lipids	LPC	-	A	23640	35513	27864	29005.7	10104	14396	7796.6	10765.5	1.33096	0.371153	-1.42991	down
pma1303	C24H46NO7P	LysoPC 16:2	Lipids	LPC	-	A	85740	207210	126780	139910	83328	36913	35554	51931.7	1.16615	0.371179	-1.42981	down
pmp001270	C24H48NO7P	LysoPC 16:1	Lipids	LPC	76790-27-7	A	298370	707400	322100	442623	227860	252030	116410	198767	1.05583	0.449065	-1.155	down
pmb0855	C24H50NO7P	LysoPC 16:0	Lipids	LPC	17364-16-8	A	16464000	42906000	23244000	27538000	10954000	7244000	6721400	8.30647e+06	1.27285	0.301637	-1.72912	down
pmd0132	C24H50NO7P	LysoPC 16:0(2n isomer)	Lipids	LPC	-	A	2832800	6696400	3789300	4439500	2004700	1185400	1080600	1.42357e+06	1.26442	0.320659	-1.64089	down
Lmhp010040	C25H46NO7P	LysoPE 20:3	Lipids	LPE	-	A	10230	41778	16327	22778.3	9047.9	3430.3	2673.9	5050.7	1.16473	0.221733	-2.17311	down
Lmhp009802	C25H46NO7P	LysoPE 20:3(2n isomer)	Lipids	LPE	-	A	9820.9	45046	16330	23732.3	10295	4445.9	2541.3	5760.73	1.09481	0.242738	-2.04253	down
Lmhp010514	C25H48NO7P	LysoPE 20:2(2n isomer)	Lipids	LPE	-	A	7661.7	32325	11652	17212.9	10075	3555.5	2382.5	5337.67	1.01602	0.310097	-1.68921	down
Lmhp008718	C25H48NO7P	LysoPC 17:2	Lipids	LPC	-	A	32236	129640	46123	69333	22672	21267	6269.3	16736.1	1.10492	0.241387	-2.05058	down
Lmhp010757	C25H48NO7P	LysoPE 20:2	Lipids	LPE	-	A	19265	109890	36410	55188.3	20163	4987.4	5804.2	10318.2	1.12592	0.186963	-2.41917	down
Lmhp009590	C25H50NO7P	LysoPC 17:1	Lipids	LPC	-	A	36866	95585	50845	61098.7	26757	18980	12836	19524.3	1.22762	0.319554	-1.64587	down
Lmhp010515	C25H52NO7P	LysoPC 17:0(2n isomer)	Lipids	LPC	-	A	22348	38881	30843	30690.7	10896	17716	8369.7	12327.2	1.24815	0.401661	-1.31595	down
pmb2406	C25H52NO7P	LysoPC 17:0	Lipids	LPC	50930-23-9	A	14059	23413	19249	18907	6263.4	10984	3784.3	7010.57	1.21141	0.370792	-1.43132	down
Lmhp009526	C27H46O9	2-α-Linolenoyl-glycerol-1-O-glucoside	Lipids	Glycerol ester	-	A	94485	117980	178600	130355	63471	91147	33114	62577.3	1.05877	0.480053	-1.05873	down
Lmhp009773	C27H46O9	1-α-Linolenoyl-glycerol-3-O-glucoside	Lipids	Glycerol ester	-	A	170740	325770	197380	231297	157590	58032	57857	91159.7	1.15671	0.394124	-1.34328	down
Lmhp010334	C27H48O9	2-Linoleoylglycerol-1-O-glucoside	Lipids	Glycerol ester	-	A	2142.4	7624	6582.3	5449.57	1761.6	1955.3	1087.6	1601.5	1.13657	0.293877	-1.76672	down
Lmhp010573	C27H48O9	1-Linoleoylglycerol-3-O-glucoside	Lipids	Glycerol ester	-	A	4232.2	15247	7737	9072.07	3363.3	418.57	1526.2	1769.36	1.15148	0.195033	-2.35821	down
pmp001251	C26H50NO7P	LysoPC 18:2(2n isomer)	Lipids	LPC	-	A	1395900	4967200	2105300	2822800	1354900	1158600	392980	968827	1.01491	0.343215	-1.54282	down
pmp001273	C26H50NO7P	LysoPC 18:2	Lipids	LPC	-	A	1001200	2507300	1139900	1.54947e+06	751490	542450	328270	540737	1.17462	0.348982	-1.51877	down
mws0126	C26H54NO7P	LysoPC 18:0	Lipids	LPC	19420-57-6	A	272160	780920	422500	491860	211780	159070	150460	173770	1.21012	0.353292	-1.50107	down
Lmhp007840	C27H52NO7P	LysoPC 19:2	Lipids	LPC	-	A	6838.4	33061	21970	20623.1	9621.4	5294	2733.3	5882.9	1.02455	0.285257	-1.80966	down
Lmhp007598	C27H52NO7P	LysoPC 19:2(2n isomer)	Lipids	LPC	-	A	7641.1	16407	18184	14077.4	4825.7	8797.4	6472.4	6698.5	1.06225	0.475835	-1.07147	down
Lmhp011549	C28H56NO7P	LysoPC 20:1	Lipids	LPC	-	A	18088	67089	31659	38945.3	20589	11996	13869	15484.7	1.02646	0.3976	-1.33061	down
Lmhp008744	C33H56O14	1-α-Linolenoyl-glycerol-2,3-di-O-glucoside	Lipids	Glycerol ester	-	A	110460	288130	265270	221287	101920	51284	33764	62322.7	1.18959	0.281638	-1.82809	down
Lmhp008513	C33H56O14	2-α-Linolenoyl-glycerol-1,3-di-O-glucoside	Lipids	Glycerol ester	-	A	242530	381650	480270	368150	102080	103070	69515	91555	1.36044	0.248689	-2.00758	down
Lmhp009190	C33H58O14	2-Linoleoylglycerol-1,3-di-O-glucoside	Lipids	Glycerol ester	-	A	18459	30982	39617	29686	7093.5	7255.4	2047.1	5465.33	1.26898	0.184105	-2.4414	down
Lmhp009384	C33H58O14	1-Linoleoylglycerol-2,3-di-O-glucoside	Lipids	Glycerol ester	-	A	10621	17990	13712	14107.7	6151.5	2865.7	3212	4076.4	1.32824	0.288949	-1.79111	down
pme0128	C6H12N2O3	L-Alanyl-L-Alanine	Amino acids and derivatives	Amino acids and derivatives	1948-31-8	B	7475	11465	16295	11745	27882	25953	30985	28273.3	1.29766	2.40727	1.2674	up
pme3827	C9H11NO4	3,4-Dihydroxy-L-phenylalanine (L-Dopa)	Amino acids and derivatives	Amino acids and derivatives	59-92-7	B	21334	16640	13999	17324.3	97550	259430	121290	159423	1.38841	9.20228	3.20199	up
pme1086	C10H17N3O6S	Glutathione reduced form	Amino acids and derivatives	Amino acids and derivatives	70-18-8	A	136880	139240	251930	176017	498440	612480	382750	497890	1.3306	2.82865	1.50011	up
mws2213	C9H8O2	Cinnamic acid	Phenolic acids	Phenolic acids	140-10-3	A	5057.4	8270.1	18485	10604.2	61754	50312	53884	55316.7	1.33742	5.2165	2.38308	up
Lmxp001668	C9H10O2	2-Methoxy-4-ethenylphenol	Phenolic acids	Phenolic acids	7786-61-0	A	145100	109600	25633	93444.3	1559300	1040100	2178400	1592600	1.34049	17.0433	4.09113	up
mws0458	C8H8O3	Vanillin	Phenolic acids	Phenolic acids	121-33-5	B	16679	44362	45089	35376.7	233680	178480	333470	248543	1.35115	7.02563	2.81263	up
mws0183	C7H6O4	3,4-Dihydroxybenzoic acid (Protocatechuic acid)*	Phenolic acids	Phenolic acids	99-50-3	A	21305	28042	15342	21563	51528	45674	206390	101197	1.12453	4.6931	2.23054	up
pme3381	C9H10O3	3-Hydroxyphenylacetic Acid Methyl Ester	Phenolic acids	Phenolic acids	42058-59-3	B	1132	1289.4	2851.5	1757.63	5228.9	4257.1	11126	6870.67	1.24092	3.90904	1.96682	up
mws0009	C10H10O3	Coniferaldehyde	Phenolic acids	Phenolic acids	20649-42-7	B	26800	16015	62845	35220	222170	137620	203960	187917	1.32124	5.33551	2.41563	up
mws1350	C9H10O4	Syringaldehyde; 4-Hydroxy-3,5-Dimethoxybenzaldehyde	Phenolic acids	Phenolic acids	134-96-3	B	9	9	9	9	8105.6	9	4862.4	4325.67	1.01075	480.63	8.90878	up
Lmdn003756	C10H10O4	Methyl caffeate	Phenolic acids	Phenolic acids	3843-74-1	A	96931	170920	431690	233180	1831400	1789400	1190500	1.60377e+06	1.33559	6.8778	2.78195	up
pme3443	C11H12O4	Sinapinaldehyde	Phenolic acids	Phenolic acids	4206-58-0	B	8172.7	8718.9	11385	9425.53	23200	19886	22774	21953.3	1.40279	2.32913	1.21979	up
Lmhn002629	C11H10O7	Benzoyltartaric acid	Phenolic acids	Phenolic acids	-	B	9	9	9	9	403020	740570	695590	613060	1.4459	68117.8	16.0557	up
Lmhn102068	C13H12O8	2-O-Caffeoylmalic acid	Phenolic acids	Phenolic acids	53755-04-7	B	9335.5	5116.8	1141.2	5197.83	20778	25131	34136	26681.7	1.19175	5.13323	2.35987	up
Zmhn001926	C13H16O8	1-O-Salicyl-D-glucose	Phenolic acids	Phenolic acids	60517-74-0	A	7395400	11698000	6249200	8.44753e+06	44886000	45779000	30565000	40410000	1.38519	4.78364	2.25811	up
Zmhn000892	C13H18O8	4-O-Glucosyl-3,4-dihydroxybenzyl alcohol	Phenolic acids	Phenolic acids	-	A	157160	78599	95076	110278	253740	297530	330490	293920	1.33102	2.66526	1.41427	up
Lmhn001477	C13H12O9	2-Caffeoyl-L-tartaric acid (Caftaric acid)	Phenolic acids	Phenolic acids	67879-58-7	A	9	9	9	9	471620	764040	601070	612243	1.44653	68027	16.0538	up
pmb2871	C13H16O9	1-O-Gentisoyl-D-glucoside*	Phenolic acids	Phenolic acids	23445-11-6	A	304990	321020	218610	281540	598490	1270900	476360	781917	1.20038	2.77728	1.47367	up
pmn001367	C13H16O9	Protocatechuic acid-4-O-glucoside*	Phenolic acids	Phenolic acids	-	A	196140	231500	157690	195110	442640	889000	292740	541460	1.16734	2.77515	1.47257	up
Hmtn001120	C14H20O8	5-(2-Hydroxyethyl)-2-O-glucosylphenol	Phenolic acids	Phenolic acids	-	A	101270	32517	59252	64346.3	799750	559210	895860	751607	1.39592	11.6806	3.54605	up
Lmhn002140	C14H14O9	Feruloyltartaric acid (Fertaric acid)	Phenolic acids	Phenolic acids	-	B	9	9	9	9	1888300	2544600	1774700	2069200	1.44686	229911	17.8107	up
pmn001517	C15H22O8	3,4,5-Trimethoxyphenyl-1-O-Glucoside	Phenolic acids	Phenolic acids	-	B	2181400	4697800	1844800	2908000	7722900	4369600	7339000	6.47717e+06	1.11046	2.22736	1.15534	up
Lmtn000940	C14H18O10	1-O-(3,4-Dihydroxy-5-methoxy-benzoyl)-glucoside	Phenolic acids	Phenolic acids	-	B	9277.7	3968.4	6205.9	6484	108370	109940	121150	113153	1.42939	17.4512	4.12525	up
Lmbp002309	C17H22O9	Sinapaldehyde-4-O-Glucoside	Phenolic acids	Phenolic acids	154461-65-1	B	19524	35337	31859	28906.7	160910	88045	149900	132952	1.36141	4.59934	2.20143	up
Cmjn004337	C18H26O10	Benzyl-(2''-O-xylosyl)glucoside	Phenolic acids	Phenolic acids	-	B	24865	12709	13717	17097	54581	46129	53733	51481	1.35273	3.01111	1.5903	up
pmb2654	C19H27NO12	Anthranilate-1-O-Sophoroside	Phenolic acids	Phenolic acids	-	B	189340	43215	63127	98560.7	152810	195730	481090	276543	1.01427	2.80582	1.48842	up
Zmhn002508	C21H28O12	4-p-Cumaroyl-rhamnosyl-(1→6)-D-glucose	Phenolic acids	Phenolic acids	-	B	9	9	9	9	9058.8	26787	16791	17545.6	1.4423	1949.51	10.9289	up
Zmhn004909	C21H18O13	3,4-Digalloylshikimic acid	Phenolic acids	Phenolic acids	-	B	13789	13883	15731	14467.7	96778	85690	68971	83813	1.43872	5.79312	2.53434	up
Lmnn002886	C23H26O11	1'-O-(3,4-Dihydroxyphenethyl)-O-caffeoyl-glucoside	Phenolic acids	Phenolic acids	-	B	3654400	3309100	3588700	3517400	20775000	22972000	17247000	2.03313e+07	1.44215	5.78022	2.53112	up
pme0033	C5H4N4O	Hypoxanthine	Nucleotides and derivatives	Nucleotides and derivatives	68-94-0	B	33019	10016	6448.1	16494.4	380170	375290	458260	404573	1.38886	24.528	4.61636	up
mws1060	C10H12N4O5	9-(Arabinosyl)hypoxanthine	Nucleotides and derivatives	Nucleotides and derivatives	7013-16-3	A	110620	85872	96207	97566.3	270140	282670	103280	218697	1.07091	2.24152	1.16448	up
mws0668	C10H12N4O6	Xanthosine	Nucleotides and derivatives	Nucleotides and derivatives	146-80-5	A	544850	419960	533680	499497	1172800	1316300	555350	1.01482e+06	1.10834	2.03168	1.02267	up
pme2954	C15H10O7	Quercetin	Flavonoids	Flavonols	117-39-5	A	87570	36640	56787	60332.3	155420	205590	149960	170323	1.30699	2.82309	1.49727	up
Cmsp004086	C16H14O6	Dihydrokaempferide	Flavonoids	Flavonols	137225-59-3	B	32542	28892	24411	28615	221780	307640	194990	241470	1.43177	8.43858	3.077	up
mws0044	C15H12O7	Dihydroquercetin(Taxifolin)	Flavonoids	Dihydroflavonol	480-18-2	B	9	9	9	9	44609	62399	28313	45107	1.44573	5011.89	12.2911	up
mws0066	C16H12O7	Isorhamnetin	Flavonoids	Flavonols	480-19-3	A	36418	43270	50130	43272.7	81308	176130	51038	102825	1.03583	2.37622	1.24867	up
Lmmn004912	C16H12O7	3-O-Methylquercetin	Flavonoids	Flavonols	1486-70-0	B	4791.4	2664.4	5218.7	4224.83	9059.6	5923.5	18029	11004	1.0934	2.60461	1.38107	up
mws2186	C20H18O11	Avicularin(Quercetin-3-O-α-L-arabinofuranoside)	Flavonoids	Flavonols	572-30-5	A	6415.3	4114.6	363.97	3631.29	326780	666670	272340	421930	1.35602	116.193	6.86038	up
Lmdp003509	C20H18O11	Quercetin-3-O-xyloside (Reynoutrin)	Flavonoids	Flavonols	549-32-6	B	8058.6	7802.2	4769.7	6876.83	419060	943140	416500	592900	1.43171	86.217	6.4299	up
Hmcp002316	C21H20O11	Isorhamnetin-3-O-arabinoside	Flavonoids	Flavonols	-	A	48149	67177	68961	61429	160740	912930	108090	393920	1.06829	6.41261	2.68091	up
mws0045	C21H20O11	Quercetin-3-O-rhamnoside(Quercitrin)	Flavonoids	Flavonols	522-12-3	B	9	9	9	9	41896	60604	29571	44023.7	1.446	4891.52	12.2561	up
mws0913	C21H20O11	Kaempferol-3-O-galactoside (Trifolin)	Flavonoids	Flavonols	23627-87-4	B	13955	30359	21714	22009.3	50685	164900	54817	90134	1.19938	4.09526	2.03396	up
HJN086	C21H22O11	Eriodictyol-3'-O-glucoside	Flavonoids	Dihydroflavone	-	B	9	9	1542.6	520.2	30650	6638.7	23886	20391.6	1.24673	39.1995	5.29276	up
Hmcp002539	C22H22O11	Isorhamnetin-3-O-rhamnoside	Flavonoids	Flavonols	-	B	7624.3	10076	18094	11931.4	43338	157260	17147	72581.7	1.07391	6.08323	2.60484	up
mws1329	C21H20O12	Quercetin-7-O-glucoside*	Flavonoids	Flavonols	491-50-9	A	18287	19521	13370	17059.3	291680	553570	428160	424470	1.43179	24.882	4.63703	up
mws0091	C21H20O12	Quercetin-3-O-glucoside (Isoquercitrin)*	Flavonoids	Flavonols	482-35-9	A	47499	24988	31777	34754.7	623740	1055900	621530	767057	1.43097	22.0706	4.46405	up
mws0061	C21H20O12	Quercetin-3-O-galactoside (Hyperin)	Flavonoids	Flavonols	482-36-0	A	67859	45321	56894	56691.3	827570	1998500	1184300	1336790	1.42695	23.5801	4.5595	up
Lmdp003286	C21H20O12	Isohyperoside	Flavonoids	Flavonols	35589-21-0	A	847470	972240	892050	903920	4447700	7794200	5550300	5.93073e+06	1.42448	6.56113	2.71394	up
Lmzp002365	C22H24O11	Hesperetin-7-O-glucoside	Flavonoids	Flavonoid	31712-49-9	B	103680	42212	76506	74132.7	511460	612580	445710	523250	1.40192	7.05829	2.81932	up
pme1598	C22H24O11	Hesperetin-5-O-glucoside	Flavonoids	Dihydroflavonol	69651-80-5	B	36217	24931	26674	29274	530540	968680	664790	721337	1.43625	24.6409	4.62298	up
Xmsn002700	C21H22O12	Taxifolin-3'-O-glucoside	Flavonoids	Flavonoid	31106-05-5	B	9	9	9	9	15412	21215	14548	17058.3	1.44662	1895.37	10.8883	up
Lmmp003783	C21H18O13	Quercetin-3-O-glucuronide	Flavonoids	Flavonols	22688-79-5	B	110810	36439	90207	79152	3355000	5389100	4274100	4339400	1.42909	54.8236	5.77673	up
Lmfn003760	C21H18O13	Quercetin-4′-O-glucuronide	Flavonoids	Flavonols	201463-36-7	A	484820	422690	396430	434647	2503900	2644300	2027100	2.39177e+06	1.4381	5.50278	2.46016	up
Hmjp003123	C21H18O13	Quercetin-5-O-glucuronide	Flavonoids	Flavonols	-	B	1245100	863580	890610	999763	7848600	6085900	5736600	6.55703e+06	1.42965	6.55859	2.71338	up
Lmjp003044	C22H22O12	Isorhamnetin-3-O-Glucoside*	Flavonoids	Flavonols	5041-82-7	A	433840	408880	423280	422000	1548900	7953100	1102300	3.53477e+06	1.19353	8.37622	3.0663	up
Hmcp002207	C22H22O12	Isorhamnetin-7-O-glucoside (Brassicin)*	Flavonoids	Flavonols	6743-96-0	A	458300	380010	403490	413933	1449400	8622200	1106000	3.72587e+06	1.17717	9.00113	3.17011	up
Hmln002189	C24H22O15	Quercetin-3-O-(6''-malonyl)galactoside	Flavonoids	Flavonols	-	A	9	9	9	9	18505	196880	13633	76339.3	1.42134	8482.15	13.0502	up
Lmmp003306	C25H26O15	Quercetin-3-O-xylosyl(1→2)arabinoside	Flavonoids	Flavonols	-	A	32109	32363	36613	33695	1452400	1039500	1271300	1254400	1.44432	37.2281	5.21832	up
Zmxp005470	C26H26O15	Tricin-7-O-(6''-O-malonyl)glucoside	Flavonoids	Flavonoid	-	B	9	9	9	9	7089.2	4198.4	20910	10732.5	1.43049	1192.5	10.2198	up
Lmnp002741	C27H30O14	Genkwanin-6-C-(2''-O-apiosyl)glucoside	Flavonoids	Flavonoid carbonoside	-	B	9	9	9	9	18935	24944	18109	20662.7	1.44674	2295.85	11.1648	up
Hmgp003641	C28H32O14	Chrysoeriol-6-C-rhamnoside-7-O-rhamnoside	Flavonoids	Flavonoid	-	B	12988	11137	16137	13420.7	57564	42199	100020	66594.3	1.362	4.96207	2.31094	up
pmp001288	C28H32O14	Acacetin-7-O-rutinoside (Linarin)	Flavonoids	Flavonoid	480-36-4	A	442270	364960	454500	420577	1925200	1319900	3379700	2.20827e+06	1.35964	5.25057	2.39247	up
mws1290	C30H26O13	Kaempferol-3-O-(6''-p-Coumaroyl)glucoside (Tiliroside)	Flavonoids	Flavonols	20316-62-5	B	9	9	9	9	86115	13976	109650	69913.7	1.42803	7768.19	12.9234	up
Lmjp002596	C26H28O16	Quercetin-3-O-sambubioside	Flavonoids	Flavonols	83048-35-5	A	12071	26853	28696	22540	1083400	1837200	1204200	1.37493e+06	1.43066	60.9997	5.93073	up
Lmtp004044	C26H28O16	Quercetin-3-O-apiosyl(1→2)galactoside	Flavonoids	Flavonols	-	B	486360	520990	577600	528317	29638000	33497000	24475000	2.92033e+07	1.44616	55.2762	5.78859	up
Lmmp003091	C27H30O16	Quercetin-3-O-(4''-O-glucosyl)rhamnoside	Flavonoids	Flavonols	59262-54-3	B	5008.5	8681.6	7796	7162.03	80259	195980	123660	133300	1.41538	18.612	4.21816	up
Lmsp004166	C27H30O16	Quercetin-3-O-glucoside-7-O-rhamnoside	Flavonoids	Flavonols	-	B	51296	36388	60012	49232	2766200	3670500	3090400	3175700	1.44488	64.5048	6.01133	up
mws0059	C27H30O16	Quercetin-3-O-rutinoside (Rutin)	Flavonoids	Flavonols	153-18-4	A	22462	18558	27701	22907	1200600	1268100	1256900	1.24187e+06	1.44628	54.2134	5.76058	up
Lmbp002336	C27H30O16	Quercetin-3-O-(2''-O-rhamnosyl)galactoside	Flavonoids	Flavonols	-	B	162950	111300	179410	151220	8316000	9330300	9045200	8.89717e+06	1.44534	58.8359	5.87863	up
Lmjp002461	C27H30O16	Quercetin-3-O-neohesperidoside	Flavonoids	Flavonols	117611-67-3	A	57211	41762	55138	51370.3	2722000	3642500	2801800	3.05543e+06	1.44571	59.4786	5.8943	up
Lmyn001269	C27H30O16	Kaempferol-3-O-sophoroside	Flavonoids	Flavonoid	19895-95-5	B	516810	653180	369670	513220	1157500	1102400	903600	1054500	1.28848	2.05467	1.03891	up
Hmjp002999	C28H32O16	Isorhamnetin-3-O-rutinoside (Narcissin)	Flavonoids	Flavonoid	604-80-8	B	45029	108530	78898	77485.7	1580000	5634500	1140200	2784900	1.37878	35.9408	5.16755	up
Zmxp002867	C28H32O16	Chrysoeriol-5,7-di-O-glucoside	Flavonoids	Flavonoid	-	B	31899	15636	58263	35266	78538	88684	191810	119677	1.17368	3.39356	1.7628	up
Lmsp004045	C28H32O16	Isorhamnetin-3-O-glucoside-7-O-rhamnoside	Flavonoids	Flavonols	-	A	1581.8	5311	4198.5	3697.1	11578	30163	8430	16723.7	1.17633	4.52346	2.17743	up
pme1540	C28H32O16	Isorhamnetin-3-O-neohesperidoside	Flavonoids	Flavonols	55033-90-4	A	5808.8	4753.5	2077.5	4213.27	20545	49565	12666	27592	1.26076	6.54884	2.71124	up
Lmtp003677	C27H30O17	Quercetin-3-O-sophoroside (Baimaside)	Flavonoids	Flavonols	18609-17-1	B	4618.2	9	9	1545.4	27636	27135	27068	27279.7	1.18678	17.6522	4.14177	up
Lmsp003729	C27H30O17	Myricetin-3-O-rutinoside	Flavonoids	Flavonols	-	B	9	9	9	9	311020	273070	445350	343147	1.44566	38127.4	15.2185	up
Hmlp002975	C28H30O17	Isorhamnetin-3-O-glucuronide-7-O-rhamnoside	Flavonoids	Flavonols	-	B	7448.2	13143	20425	13672.1	123760	300870	90901	171844	1.36308	12.569	3.65179	up
Lmmp002560	C27H28O18	Quercetin-3-O-(2''-O-glucosyl)glucuronide	Flavonoids	Flavonols	-	B	9	9	9	9	82692	138410	102650	107917	1.44636	11990.8	13.5496	up
Hmcp001578	C28H32O17	Isorhamnetin-3,7-O-diglucoside	Flavonoids	Flavonols	6758-51-6	B	9	9	9	9	9	52571	13502	22027.3	1.01855	2447.48	11.2571	up
Lmmp003266	C29H30O19	Quercetin-3-O-(2''-malonyl)glucoside-7-O-arabinoside	Flavonoids	Flavonols	-	A	9	9	9	9	17730	228090	46025	97281.7	1.42811	10809.1	13.4	up
Xmyp004678	C32H38O19	Kaempferol-3-O-(2-O-Xylosyl-6-O-Rhamnosyl)Glucoside	Flavonoids	Flavonoid	-	A	9	9	9	9	90046	134400	72358	98934.7	1.44641	10992.7	13.4243	up
HJAP061	C32H38O20	Quercetin-3-O-(2''-O-arabinosyl)rutinoside	Flavonoids	Flavonols	-	A	87635	110380	108220	102078	1745600	2663100	2473100	2.29393e+06	1.43994	22.4723	4.49007	up
Hmcp001618	C32H38O20	Quercetin-3-O-(2''-O-Xylosyl)rutinoside	Flavonoids	Flavonols	129235-39-8	B	9	9	9	9	47131	60249	48097	51825.7	1.44681	5758.41	12.4915	up
Lnrp102163	C33H40O20	Quercetin-3-O-rutinoside-7-O-rhamnoside	Flavonoids	Flavonols	-	A	9	4601.2	2548.8	2386.33	42399	41044	28042	37161.7	1.06327	15.5727	3.96095	up
Hmcp001559	C33H40O20	Isorhamnetin-3-O-rutinoside-7-O-arabinoside	Flavonoids	Flavonols	-	B	9	9	9	9	1235.5	6478.6	2916.3	3543.47	1.42855	393.719	8.62102	up
HJAP127	C33H40O20	Quercetin-3-O-(2''-O-Rhamnosyl)rutinoside	Flavonoids	Flavonols	55696-57-6	A	183240	127050	213780	174690	14230000	13578000	18546000	1.54513e+07	1.44354	88.45	6.46679	up
Hmcp001329	C32H38O21	Quercetin-3-O-xylosyl(1→2)glucosyl(1→2)glucoside	Flavonoids	Flavonols	-	A	9	9	9	9	47457	72213	51247	56972.3	1.44656	6330.26	12.628	up
Lmyp003588	C35H28O20	Quercetin-3-O-(2'',6''-digalloyl)-glucoside	Flavonoids	Flavonols	-	B	21734	10690	14611	15678.3	580320	589070	518250	562547	1.43964	35.8805	5.16513	up
HJAP128	C34H42O20	Isorhamnetin-3-O-rutinoside-7-O-rhamnoside	Flavonoids	Flavonoid	-	A	154860	199240	283860	212653	925880	2773000	528480	1409120	1.24447	6.62637	2.72822	up
HJAP023	C33H40O21	Kaempferol-6,8-di-C-glucoside-7-O-glucoside	Flavonoids	Flavonoid	-	B	9	9	9	9	18857	3558.6	50136	24183.9	1.41241	2687.1	11.3918	up
Hmcp001589	C34H42O21	Isorhamnetin-3-O-rutinoside-4'-O-glucoside	Flavonoids	Flavonols	111393-97-6	B	9	9	9	9	3942.4	63337	18936	28738.5	1.41639	3193.16	11.6408	up
Lmhp002374	C39H50O25	Quercetin-3-O-glucosyl(1→4)rhamnoside-7-O-rutinoside	Flavonoids	Flavonols	-	B	9	9	9	9	101190	61971	119250	94137	1.44465	10459.7	13.3525	up
HJAP123	C40H52O25	Isorhamnetin-3-O-rutinoside-7-O-rutinoside	Flavonoids	Flavonoid	-	A	2820.7	261.7	4422.7	2501.7	35345	83954	38020	52439.7	1.2962	20.9616	4.38968	up
mws4173	C11H10O4	5,7-Dimethoxycoumarin (Limettin)(Citropten)	Lignans and Coumarins	Coumarins	487-06-9	B	9	9	9	9	336350	14184	195490	182008	1.41277	20223.1	14.3037	up
mws1014	C10H8O5	Fraxetin (7,8-Dihydroxy-6-methoxycoumarin)	Lignans and Coumarins	Coumarins	574-84-5	B	72732	212640	294390	193254	499770	491670	564640	518693	1.16121	2.684	1.42438	up
Zmgn000447	C3H7O7P	3-Phospho-D-glyceric acid	Others	Saccharides and Alcohols	820-11-1	B	400160	265740	513640	393180	1096500	460190	2081600	1.21276e+06	1.03587	3.0845	1.62504	up
pme0519	C12H22O11	D-Sucrose*	Others	Saccharides and Alcohols	57-50-1	A	605660	190810	212560	336343	556120	606250	1065200	742523	1.05151	2.20764	1.1425	up
pmb0037	C10H15NO	Hordenine	Alkaloids	Alkaloids	539-15-1	B	534380	176930	210840	307383	1304600	887330	1576100	1256010	1.28946	4.08614	2.03074	up
Lmtp001399	C14H17NO7	5,6-Dihydroxyindole-5-O-β-glucoside	Alkaloids	Alkaloids	-	B	9	9	9	9	187710	253940	178680	206777	1.44681	22975.2	14.4878	up
pmb2211	C19H38N2O3	Cocamidopropyl betaine	Alkaloids	Alkaloids	4292-10-8	A	16168	12673	27882	18907.7	36981	37110	58968	44353	1.23137	2.34577	1.23006	up
Lmhp005872	C25H30N2O6	Diferuloylcadaverine	Alkaloids	Phenolamine	-	B	9	9	9	9	2599.3	20350	5720.5	9556.6	1.42552	1061.84	10.0524	up
mws1138	C24H26N2O13	Betanin (Betanidin-5-O-glucoside)	Alkaloids	Alkaloids	7659-95-2	B	2526.2	5640.2	3031.5	3732.63	14514	131880	22748	56380.7	1.23106	15.1048	3.91693	up
Lmsn006130	C36H56O12	2α,3β,19α-Trihydroxyurs-12-en-23,28-dioic acid-28-O-glucoside	Terpenoids	Triterpene	-	A	10315	9366.7	10224	9968.57	22125	18484	19592	20067	1.42683	2.01303	1.00937	up
mws0596	C7H7NO3	3-Hydroxyanthranilic acid	Organic acids	Organic acids	548-93-6	B	22919	22073	8451.5	17814.5	39607	24672	54170	39483	1.02566	2.21634	1.14818	up
Zmjn001813	C7H12O4	Pimelic acid*	Organic acids	Organic acids	111-16-0	B	20967	31784	19466	24072.3	74203	52969	146100	91090.7	1.26282	3.78404	1.91993	up
mws5045	C12H24O3	12-Hydroxydodecanoic acid	Lipids	Free fatty acids	505-95-3	A	2488.7	1311.2	1777.5	1859.13	36291	18529	44739	33186.3	1.40984	17.8504	4.15789	up
Zmpn003368	C18H30O3	13S-Hydroxy-9Z,11E,15Z-octadecatrienoic acid	Lipids	Free fatty acids	87984-82-5	B	78333	99422	321360	166372	427970	263620	680950	457513	1.08069	2.74995	1.4594	up
pmn001606	C20H38O2	Eicosenoic acid	Lipids	Free fatty acids	26764-41-0	A	777760	288680	707870	591437	1057900	1288100	1256700	1200900	1.14155	2.03048	1.02182	up
Hmqn003054	C18H34O5	9,10,11-Trihydroxy-12-octadecenoic acid	Lipids	Free fatty acids	61911-67-9	A	22688	19581	26866	23045	52006	40538	50171	47571.7	1.379	2.06429	1.04565	up
Lmbn003970	C18H34O5	9,12,13-TriHOME; 9(S),12(S),13(S)-Trihydroxy-10(E)-octadecenoic acid	Lipids	Free fatty acids	97134-11-7	A	27084	33932	30417	30477.7	85452	86039	92280	87923.7	1.43138	2.88486	1.5285	up
