# Supplementary material for: Elucidating the Differentiation Synthesis Mechanisms of Differently Colored Resistance Quinoa Seedings Using Metabolite Profiling and Transcriptome Analysis
Source: Metabolites. 2023 Oct 10;13(10):1065. doi: 10.3390/metabo13101065 (PMC10609267; doi:10.3390/metabo13101065)
Supplement: Supplementary file 1 [file metabolites-13-01065-s001.zip › Table S13.xlsx]

## Sheet: Sheet1
Table S13 Significantly different metabolites in R-YvsR-B
Index	Formula	Compounds	Class I	Class II	CAS	Level	R-Y1	R-Y2	R-Y3	R-Y average	R-B1	R-B2	R-B3	R-B average	VIP	Fold_Change	Log2FC	Type
pmb0468	C6H11NO3S	N-Formyl-L-Methionine	Amino acids and derivatives	Amino acids and derivatives	4289-98-9	B	24420	22186	59326	35310.7	11979	17875	15185	15013	1.4485	0.425169	-1.23389	down
pme3388	C7H16N4O2	Homoarginine	Amino acids and derivatives	Amino acids and derivatives	156-86-5	B	9005.2	77169	73484	53219.4	7856.4	13251	8901.1	10002.8	1.2676	0.187955	-2.41154	down
pmb2873	C13H13NO2	3-(2-Naphthyl)-L-alanine	Amino acids and derivatives	Amino acids and derivatives	58438-03-2	B	10351	10313	19910	13524.7	7143.5	9	9606.7	5586.4	1.00628	0.413053	-1.2756	down
Lmrj001698	C9H18N2O4	L-Seryl-L-Isoleucine	Amino acids and derivatives	Amino acids and derivatives	91086-51-0	A	285910	90017	140370	172099	111770	79194	52642	81202	1.24621	0.471833	-1.08365	down
pme1228	C11H12N2O3	5-Hydroxy-L-tryptophan	Amino acids and derivatives	Amino acids and derivatives	56-69-9	A	20680	10555	12420	14551.7	9	9	9	9	1.88226	0.000618486	-10.659	down
Hmgn001653	C7H6O3	Protocatechualdehyde*	Phenolic acids	Phenolic acids	139-85-5	B	1557100	771500	568100	965567	220500	340290	184220	248337	1.64067	0.257193	-1.95908	down
mws0749	C7H6O3	4-Hydroxybenzoic acid	Phenolic acids	Phenolic acids	99-96-7	B	1577700	872090	530140	993310	188580	369970	234240	264263	1.59587	0.266043	-1.91027	down
Lmbn001981	C7H6O3	2,5-Dihydroxybenzaldehyde*	Phenolic acids	Phenolic acids	1194-98-5	B	1387400	779320	598110	921610	132760	313460	210040	218753	1.66995	0.23736	-2.07485	down
pme2362	C8H8O3	Mandelic acid	Phenolic acids	Phenolic acids	90-64-2	B	100870	100070	108520	103153	48027	29240	57140	44802.3	1.72939	0.434328	-1.20314	down
mws0028	C8H8O4	Vanillic acid	Phenolic acids	Phenolic acids	121-34-6	B	116410	44048	40604	67020.7	10887	26231	18950	18689.3	1.52605	0.278859	-1.84239	down
pmn001690	C16H24O7	3-Hydroxy-4-isopropylbenzylalcohol-3-O-glucoside	Phenolic acids	Phenolic acids	-	B	107450	45501	43767	65572.7	26697	23466	29140	26434.3	1.52403	0.40313	-1.31068	down
mws0011	C17H24O9	Syringin	Phenolic acids	Phenolic acids	118-34-3	B	572180	1009800	549230	710403	186660	29046	111180	108962	1.65397	0.15338	-2.70481	down
pmn001707	C30H46O5	Quillaic acid	Phenolic acids	Phenolic acids	631-01-6	B	1129600	832320	1307800	1.08991e+06	709650	606650	278150	531483	1.47542	0.487641	-1.03611	down
pme3200	C2H7N3	1-methylguanidine	Nucleotides and derivatives	Nucleotides and derivatives	471-29-4	B	9	7407.1	1621.1	3012.4	9	9	9	9	1.30492	0.00298765	-8.38677	down
pme0040	C5H5N5	Adenine	Nucleotides and derivatives	Nucleotides and derivatives	73-24-5	A	23427000	14521000	12021000	1.66563e+07	8318200	9646500	5941000	7.96857e+06	1.53877	0.478411	-1.06368	down
pme1109	C5H5N5O	Guanine	Nucleotides and derivatives	Nucleotides and derivatives	73-40-5	A	287520	258440	244550	263503	82685	141760	124000	116148	1.72991	0.440785	-1.18185	down
pme3188	C9H13N2O9P	Uridine 5'-monophosphate	Nucleotides and derivatives	Nucleotides and derivatives	58-97-9	B	217070	57215	67246	113844	25593	13918	40518	26676.3	1.50831	0.234324	-2.09342	down
mws1094	C15H12O6	Aromadendrin (Dihydrokaempferol)	Flavonoids	Dihydroflavonol	480-20-6	B	7415.9	7019.8	8358.8	7598.17	1860.7	6093.9	3375.9	3776.83	1.40739	0.497072	-1.00847	down
HJN087	C21H22O10	Naringenin-4'-O-glucoside	Flavonoids	Flavonoid	-	B	49109	76497	54544	60050	26592	38437	22401	29143.3	1.60554	0.485318	-1.043	down
HJN055	C21H24O10	Dihydrocharcone-4'-O-glucoside	Flavonoids	Chalcones	-	A	835680	752530	726970	771727	326840	359760	394930	360510	1.84967	0.467147	-1.09805	down
mws2118	C21H24O10	Phloretin-2'-O-glucoside (Phlorizin)	Flavonoids	Chalcones	60-81-1	A	446860	392430	387830	409040	189780	181830	176100	182570	1.87019	0.446338	-1.16379	down
Hmcp002316	C21H20O11	Isorhamnetin-3-O-arabinoside	Flavonoids	Flavonols	-	A	853170	1160600	612720	875497	160740	912930	108090	393920	1.20879	0.449939	-1.1522	down
Lmmn004625	C21H22O11	Dihydrokaempferol-7-O-glucoside	Flavonoids	Flavonols	-	B	3574.6	2537	901.55	2337.72	9	9	9	9	1.85442	0.00384991	-8.02096	down
Lmzn001894	C21H18O12	Kaempferol-3-O-glucuronide	Flavonoids	Flavonols	22688-78-4	A	2012400	914080	803490	1.24332e+06	387310	606790	416200	470100	1.52286	0.3781	-1.40316	down
mws4167	C21H18O12	Luteolin-7-O-glucuronide	Flavonoids	Flavonoid	29741-10-4	A	5438900	2935200	3433700	3.93593e+06	1368600	1799200	1457700	1.54183e+06	1.71916	0.391733	-1.35206	down
mws1329	C21H20O12	Quercetin-7-O-glucoside*	Flavonoids	Flavonols	491-50-9	A	1697700	726790	656380	1.02696e+06	291680	553570	428160	424470	1.40557	0.413328	-1.27464	down
mws0091	C21H20O12	Quercetin-3-O-glucoside (Isoquercitrin)*	Flavonoids	Flavonols	482-35-9	A	3077700	1189600	1273900	1.84707e+06	623740	1055900	621530	767057	1.40842	0.415284	-1.26783	down
mws0061	C21H20O12	Quercetin-3-O-galactoside (Hyperin)	Flavonoids	Flavonols	482-36-0	A	4843700	1841500	1941000	2875400	827570	1998500	1184300	1336790	1.23631	0.464906	-1.10499	down
Lmdp003286	C21H20O12	Isohyperoside	Flavonoids	Flavonols	35589-21-0	A	26260000	9475900	6042700	13926200	4447700	7794200	5550300	5.93073e+06	1.08823	0.425869	-1.23152	down
Lmzp002365	C22H24O11	Hesperetin-7-O-glucoside	Flavonoids	Flavonoid	31712-49-9	B	974360	1316300	904850	1065170	511460	612580	445710	523250	1.71014	0.491236	-1.02551	down
pme1598	C22H24O11	Hesperetin-5-O-glucoside	Flavonoids	Dihydroflavonol	69651-80-5	B	2741000	1382900	764750	1629550	530540	968680	664790	721337	1.19916	0.44266	-1.17573	down
Xmsn002700	C21H22O12	Taxifolin-3'-O-glucoside	Flavonoids	Flavonoid	31106-05-5	B	67881	24052	22782	38238.3	15412	21215	14548	17058.3	1.2605	0.446106	-1.16454	down
Lmjp003044	C22H22O12	Isorhamnetin-3-O-Glucoside*	Flavonoids	Flavonols	5041-82-7	A	8450200	10174000	6486600	8.37027e+06	1548900	7953100	1102300	3.53477e+06	1.2865	0.4223	-1.24366	down
Hmcp002207	C22H22O12	Isorhamnetin-7-O-glucoside (Brassicin)*	Flavonoids	Flavonols	6743-96-0	A	8509400	9651600	6467100	8.20937e+06	1449400	8622200	1106000	3.72587e+06	1.24065	0.453856	-1.13969	down
Zmxp005470	C26H26O15	Tricin-7-O-(6''-O-malonyl)glucoside	Flavonoids	Flavonoid	-	B	30219	18939	40047	29735	7089.2	4198.4	20910	10732.5	1.45789	0.360939	-1.47017	down
HJAP148	C26H28O15	Kaempferol-3-O-sambubioside	Flavonoids	Flavonoid	27661-51-4	A	2856000	2148100	3888100	2.96407e+06	978140	904230	1788500	1.22362e+06	1.63857	0.412819	-1.27642	down
Lmtp003677	C27H30O17	Quercetin-3-O-sophoroside (Baimaside)	Flavonoids	Flavonols	18609-17-1	B	96100	61466	49597	69054.3	27636	27135	27068	27279.7	1.71685	0.395046	-1.33991	down
Hmcp001578	C28H32O17	Isorhamnetin-3,7-O-diglucoside	Flavonoids	Flavonols	6758-51-6	B	94839	73497	82040	83458.7	9	52571	13502	22027.3	1.05156	0.263931	-1.92177	down
pmp001105	C33H40O20	Kaempferol-3-O-neohesperidoside-7-O-glucoside	Flavonoids	Flavonols	-	A	110690	90687	155400	118926	23542	13789	51384	29571.7	1.67898	0.248657	-2.00777	down
Hmcp001589	C34H42O21	Isorhamnetin-3-O-rutinoside-4'-O-glucoside	Flavonoids	Flavonols	111393-97-6	B	77359	125950	152080	118463	3942.4	63337	18936	28738.5	1.39718	0.242594	-2.04338	down
Lmhp003162	C34H42O21	Chrysoeriol-6,8-di-C-glucoside-4'-O-glucoside	Flavonoids	Flavonoid	-	B	17662	41451	64307	41140	6678.5	9	9	2232.17	1.54442	0.0542578	-4.20403	down
pmb0676	C38H40O19	Chrysoeriol-8-C-glucoside-7-O-(6''-feruloyl)glucoside	Flavonoids	Flavonoid carbonoside	-	B	143700	93705	109830	115745	45635	37014	45818	42822.3	1.82191	0.369971	-1.43451	down
Rfmb26201	C30H38O14	Syringaresinol-4'-O-(6''-acetyl)glucoside	Lignans and Coumarins	Lignans	-	B	59696	18099	21422	33072.3	6616.5	17996	11102	11904.8	1.32399	0.359964	-1.47408	down
pme1137	C6H5NO3	6-Hydroxynicotinic acid	Alkaloids	Alkaloids	5006-66-6	B	132180	83059	42942	86060.3	17810	33155	25654	25539.7	1.5461	0.296765	-1.75261	down
mws0005	C10H12N2	Tryptamine	Alkaloids	Plumerane	61-54-1	A	1286800	1859100	2323700	1823200	622890	1305300	769120	899103	1.48113	0.493146	-1.01991	down
pmb0774	C10H12N2O	N-Hydroxytryptamine*	Alkaloids	Phenolamine	-	A	787860	716050	1589800	1.03124e+06	237660	463180	400580	367140	1.59803	0.356019	-1.48997	down
pme2024	C10H12N2O	Serotonin*	Alkaloids	Plumerane	50-67-9	A	1030200	1060500	2053200	1381300	255240	561950	490510	435900	1.63866	0.315572	-1.66396	down
Lmlp003161	C14H20N2O3	N-Feruloylputrescine	Alkaloids	Phenolamine	501-13-3	B	24220	16554	12102	17625.3	11851	4400.5	7948.2	8066.57	1.44602	0.457669	-1.12762	down
pmb0776	C20H20N2O3	N-Feruloyltryptamine	Alkaloids	Phenolamine	53905-13-8	A	7493.9	9571.3	20198	12421.1	1379.6	2200.3	1038.1	1539.33	1.77891	0.123929	-3.01241	down
HJAP050	C19H21NO5	N-Feruloyl-3-methoxytyramine	Alkaloids	Phenolamine	78510-19-7	A	48173	257890	313710	206591	9	129070	9	43029.3	1.30995	0.208283	-2.26339	down
Lmsn012425	C30H48O4	Rubusic acid (3β,7α-Dihydroxyolean-12-en-28-oic acid)	Terpenoids	Triterpene	23984-26-1	A	6065.3	3017.9	6308.9	5130.7	1991.1	679.05	1190.7	1286.95	1.68871	0.250833	-1.9952	down
YC512118	C18H35NO	Oleamide (9-Octadecenamide)	Lipids	Free fatty acids	301-02-0	A	23827	18939	72796	38520.7	10710	11719	29554	17327.7	1.11594	0.449828	-1.15256	down
pmb0296	C21H40O4	1-Oleoyl-Sn-Glycerol	Lipids	Glycerol ester	129784-87-8	A	353840	297520	334700	328687	188030	164630	95801	149487	1.6812	0.454801	-1.13669	down
pmd0152	C19H39O7P	LysoPA 16:0 (2n isomer)	Lipids	Glycerol ester	-	B	9	5328.6	8498.1	4611.9	9	9	9	9	1.33426	0.00195147	-9.00122	down
Lmhp008337	C19H40NO7P	LysoPE 14:0(2n isomer)	Lipids	LPE	-	B	13991	7032.8	11636	10886.6	9543.7	2923.6	3144.1	5203.8	1.36558	0.478	-1.06492	down
Lmhp008273	C20H40NO7P	LysoPE 15:1(2n isomer)	Lipids	LPE	-	B	365.38	429.11	586.32	460.27	9	9	9	9	1.88285	0.0195537	-5.67641	down
Lmhp008885	C20H42NO7P	LysoPE 15:0(2n isomer)	Lipids	LPE	-	A	6943.2	4935.5	7531.4	6470.03	5008	2172	1664.7	2948.23	1.50199	0.455675	-1.13392	down
Lmhp010334	C27H48O9	2-Linoleoylglycerol-1-O-glucoside	Lipids	Glycerol ester	-	A	2769.2	4591.8	2642.2	3334.4	1761.6	1955.3	1087.6	1601.5	1.51674	0.480296	-1.058	down
Lmhp010573	C27H48O9	1-Linoleoylglycerol-3-O-glucoside	Lipids	Glycerol ester	-	A	4046.3	4262	6658.2	4988.83	3363.3	418.57	1526.2	1769.36	1.41216	0.354663	-1.49548	down
Lmhp008744	C33H56O14	1-α-Linolenoyl-glycerol-2,3-di-O-glucoside	Lipids	Glycerol ester	-	A	298910	91348	177020	189093	101920	51284	33764	62322.7	1.46393	0.329588	-1.60126	down
Lmhp008513	C33H56O14	2-α-Linolenoyl-glycerol-1,3-di-O-glucoside	Lipids	Glycerol ester	-	A	264380	229610	295870	263287	102080	103070	69515	91555	1.82243	0.347739	-1.52392	down
Lmhp009384	C33H58O14	1-Linoleoylglycerol-2,3-di-O-glucoside	Lipids	Glycerol ester	-	A	7876.2	12061	9144.6	9693.93	6151.5	2865.7	3212	4076.4	1.63073	0.42051	-1.24979	down
pme1002	C8H11NO	L-Tyramine	Amino acids and derivatives	Amino acids and derivatives	51-67-2	A	2349500	2465900	1311600	2.04233e+06	4767400	5616600	4479800	4954600	1.74046	2.42595	1.27855	up
pme0128	C6H12N2O3	L-Alanyl-L-Alanine	Amino acids and derivatives	Amino acids and derivatives	1948-31-8	B	19296	11590	7613.2	12833.1	27882	25953	30985	28273.3	1.60387	2.20316	1.13958	up
pme0278	C7H14N2O4	2,6-Diaminooimelic acid	Amino acids and derivatives	Amino acids and derivatives	583-93-7	B	5503.8	7228.4	3073.9	5268.7	13220	24878	4945.4	14347.8	1.22927	2.72321	1.44531	up
pme3827	C9H11NO4	3,4-Dihydroxy-L-phenylalanine (L-Dopa)	Amino acids and derivatives	Amino acids and derivatives	59-92-7	B	29232	17914	19827	22324.3	97550	259430	121290	159423	1.79082	7.14124	2.83617	up
pme1086	C10H17N3O6S	Glutathione reduced form	Amino acids and derivatives	Amino acids and derivatives	70-18-8	A	182000	94531	114640	130390	498440	612480	382750	497890	1.77877	3.81846	1.93299	up
ML10179289	C8H10O	2-Phenylethanol	Phenolic acids	Phenolic acids	60-12-8	B	31096000	15435000	6766400	17765800	25377000	68203000	19300000	3.76267e+07	1.0913	2.11793	1.08265	up
mws2213	C9H8O2	Cinnamic acid	Phenolic acids	Phenolic acids	140-10-3	A	15771	34584	32192	27515.7	61754	50312	53884	55316.7	1.55092	2.01037	1.00746	up
Lmxp001668	C9H10O2	2-Methoxy-4-ethenylphenol	Phenolic acids	Phenolic acids	7786-61-0	A	529010	617560	458980	535183	1559300	1040100	2178400	1592600	1.7249	2.9758	1.57328	up
Lmrn001951	C9H10O4	(S)-2-Hydroxy-3-(4-Hydroxyphenyl)Propanoic Acid	Phenolic acids	Phenolic acids	23508-35-2	B	9	9	9	9	5442.4	7480.1	6949.1	6623.87	1.88469	735.985	9.52353	up
mws0014	C10H10O4	Ferulic acid	Phenolic acids	Phenolic acids	537-98-4	A	975870	1723800	1285600	1.32842e+06	4419000	2350600	2244300	3.00463e+06	1.54708	2.2618	1.17747	up
Lmdn003756	C10H10O4	Methyl caffeate	Phenolic acids	Phenolic acids	3843-74-1	A	37905	3744.5	2155.8	14601.8	1831400	1789400	1190500	1.60377e+06	1.79569	109.834	6.77918	up
Lmhn003373	C11H10O7	p-Hydroxybenzoylmalic acid	Phenolic acids	Phenolic acids	-	B	12034	10695	14128	12285.7	12438	56891	18604	29311	1.12461	2.38579	1.25447	up
Lmhn102068	C13H12O8	2-O-Caffeoylmalic acid	Phenolic acids	Phenolic acids	53755-04-7	B	1596.6	4301.7	6593.8	4164.03	20778	25131	34136	26681.7	1.71393	6.40765	2.6798	up
Zmhn001926	C13H16O8	1-O-Salicyl-D-glucose	Phenolic acids	Phenolic acids	60517-74-0	A	26156000	11241000	7502100	1.49664e+07	44886000	45779000	30565000	40410000	1.55813	2.70005	1.43299	up
Lmhn001477	C13H12O9	2-Caffeoyl-L-tartaric acid (Caftaric acid)	Phenolic acids	Phenolic acids	67879-58-7	A	79789	58994	72481	70421.3	471620	764040	601070	612243	1.86461	8.694	3.12002	up
pmb2871	C13H16O9	1-O-Gentisoyl-D-glucoside*	Phenolic acids	Phenolic acids	23445-11-6	A	378620	345240	322000	348620	598490	1270900	476360	781917	1.47462	2.24289	1.16536	up
pmn001367	C13H16O9	Protocatechuic acid-4-O-glucoside*	Phenolic acids	Phenolic acids	-	A	285260	234970	180540	233590	442640	889000	292740	541460	1.41217	2.31799	1.21288	up
Hmtn001120	C14H20O8	5-(2-Hydroxyethyl)-2-O-glucosylphenol	Phenolic acids	Phenolic acids	-	A	41626	175240	172100	129655	799750	559210	895860	751607	1.66862	5.79696	2.5353	up
Lmtn000940	C14H18O10	1-O-(3,4-Dihydroxy-5-methoxy-benzoyl)-glucoside	Phenolic acids	Phenolic acids	-	B	14749	16861	16763	16124.3	108370	109940	121150	113153	1.88115	7.01755	2.81097	up
pmb0374	C5H5N5	2-Aminopurine	Nucleotides and derivatives	Nucleotides and derivatives	452-06-2	A	69177	64912	45513	59867.3	145340	141020	94307	126889	1.69835	2.1195	1.08373	up
pme0033	C5H4N4O	Hypoxanthine	Nucleotides and derivatives	Nucleotides and derivatives	68-94-0	B	14713	35563	46825	32367	380170	375290	458260	404573	1.81421	12.4996	3.64381	up
pme0230	C10H13N5O4	Adenosine	Nucleotides and derivatives	Nucleotides and derivatives	58-61-7	A	623680	442250	416480	494137	1381300	1325900	774580	1.16059e+06	1.66463	2.34873	1.23188	up
mws1060	C10H12N4O5	9-(Arabinosyl)hypoxanthine	Nucleotides and derivatives	Nucleotides and derivatives	7013-16-3	A	96379	80953	94065	90465.7	270140	282670	103280	218697	1.44197	2.41745	1.27349	up
mws0884	C10H12N5O6P	Cyclic 3',5'-Adenylic acid	Nucleotides and derivatives	Nucleotides and derivatives	60-92-4	A	80821	52834	49381	61012	187400	183510	100610	157173	1.65724	2.57611	1.36519	up
Lmmn004912	C16H12O7	3-O-Methylquercetin	Flavonoids	Flavonols	1486-70-0	B	5594.1	1672	3274.5	3513.53	9059.6	5923.5	18029	11004	1.42065	3.1319	1.64704	up
mws0045	C21H20O11	Quercetin-3-O-rhamnoside(Quercitrin)	Flavonoids	Flavonols	522-12-3	B	21135	9	9	7051	41896	60604	29571	44023.7	1.4127	6.24361	2.64238	up
Hmpp003270	C21H20O11	Luteolin-4'-O-glucoside	Flavonoids	Flavonoid	6920-38-3	A	894970	461650	404310	586977	889790	2204300	657530	1250540	1.1874	2.13048	1.09118	up
Lmnp002741	C27H30O14	Genkwanin-6-C-(2''-O-apiosyl)glucoside	Flavonoids	Flavonoid carbonoside	-	B	9	9	9	9	18935	24944	18109	20662.7	1.88469	2295.85	11.1648	up
Lmyn001269	C27H30O16	Kaempferol-3-O-sophoroside	Flavonoids	Flavonoid	19895-95-5	B	729980	366930	383700	493537	1157500	1102400	903600	1054500	1.6257	2.13662	1.09533	up
mws1013	C9H6O4	Esculetin	Lignans and Coumarins	Coumarins	305-01-1	A	48774	8958.7	9	19247.2	64354	74896	50241	63163.7	1.12561	3.2817	1.71444	up
Rfmb25702	C28H34O12	Pinoresinol-4-O-(6''-acetyl)glucoside	Lignans and Coumarins	Lignans	-	B	15096	3268.3	5226.5	7863.6	12264	47544	7926	22578	1.07718	2.8712	1.52166	up
pmp000509	C6H6O3	Maltol	Others	Others	118-71-8	B	9	9	9	9	58213	67571	55135	60306.3	1.88456	6700.7	12.7101	up
Zmgn000447	C3H7O7P	3-Phospho-D-glyceric acid	Others	Saccharides and Alcohols	820-11-1	B	391760	518150	617290	509067	1096500	460190	2081600	1.21276e+06	1.12202	2.38233	1.25237	up
pme3705	C6H10O7	D-Glucoronic acid*	Others	Saccharides and Alcohols	6556-12-3	B	16262	12937	6114.3	11771.1	42061	63342	59161	54854.7	1.77364	4.66011	2.22037	up
pmn001513	C14H10O9	Digallic Acid	Tannins	Tannin	536-08-3	B	3664.8	4500.5	5478	4547.77	13681	8845.1	8127.7	10217.9	1.66394	2.2468	1.16787	up
pme2292	C4H12N2	Putrescine	Alkaloids	Phenolamine	110-60-1	B	18474	24507	22325	21768.7	56923	83770	15628	52107	1.04224	2.39367	1.25922	up
mws0491	C8H11N	Phenethylamine	Alkaloids	Alkaloids	64-04-0	A	16134000	7601900	3274900	9003600	12793000	37451000	9893000	2.00457e+07	1.09517	2.22641	1.15472	up
pma0948	C8H11NO	Phenylethanolamine	Alkaloids	Alkaloids	7568-93-6	B	978610	1019600	524410	840873	1808300	2094400	1612600	1.83843e+06	1.68192	2.18634	1.12852	up
pmb0037	C10H15NO	Hordenine	Alkaloids	Alkaloids	539-15-1	B	197280	345100	302320	281567	1304600	887330	1576100	1256010	1.79011	4.46079	2.1573	up
Zmtn001624	C10H7NO3	N-Acetylisatin	Alkaloids	Plumerane	574-17-4	A	174350	151290	93713	139784	744650	770610	735130	750130	1.85251	5.36634	2.42394	up
Lmtp001399	C14H17NO7	5,6-Dihydroxyindole-5-O-β-glucoside	Alkaloids	Alkaloids	-	B	9	9	9	9	187710	253940	178680	206777	1.88469	22975.2	14.4878	up
Lmhp005872	C25H30N2O6	Diferuloylcadaverine	Alkaloids	Phenolamine	-	B	9	9	7312	2443.33	2599.3	20350	5720.5	9556.6	1.2604	3.9113	1.96765	up
mws2125	C3H5O6P	Phosphoenolpyruvate	Organic acids	Organic acids	138-08-9	B	74319	116090	162390	117600	396070	129600	835570	453747	1.28062	3.8584	1.948	up
mws1189	C6H10O7	D-Galacturonic acid*	Organic acids	Organic acids	685-73-4	B	17387	16874	7560.4	13940.5	26641	66548	44770	45986.3	1.631	3.29877	1.72193	up
pmb0302	C2H8NO3P	2-Aminoethylphosphonate	Lipids	Glycerol ester	2041-14-7	B	18395	10949	13272	14205.3	13254	30403	43905	29187.3	1.20418	2.05467	1.03891	up
mws5045	C12H24O3	12-Hydroxydodecanoic acid	Lipids	Free fatty acids	505-95-3	A	5147.3	6544.7	6778	6156.67	36291	18529	44739	33186.3	1.7682	5.39031	2.43037	up
Zmpn003368	C18H30O3	13S-Hydroxy-9Z,11E,15Z-octadecatrienoic acid	Lipids	Free fatty acids	87984-82-5	B	167820	164990	121400	151403	427970	263620	680950	457513	1.63839	3.02182	1.59542	up
pmb2791	C18H30O4	9-Hydroperoxy-10E,12,15Z-octadecatrienoic acid	Lipids	Free fatty acids	111004-08-1	A	119190	93157	60192	90846.3	265360	284800	141380	230513	1.60348	2.5374	1.34335	up
Lmbn004685	C18H32O4	5S,8R-DiHODE; (5S,8R,9Z,12Z)-5,8-Dihydroxyoctadeca-9,12-dienoate	Lipids	Free fatty acids	-	A	8562.6	6687.7	5801.9	7017.4	18349	16791	13233	16124.3	1.77919	2.29776	1.20023	up
Lmbn003970	C18H34O5	9,12,13-TriHOME; 9(S),12(S),13(S)-Trihydroxy-10(E)-octadecenoic acid	Lipids	Free fatty acids	97134-11-7	A	37023	49249	36418	40896.7	85452	86039	92280	87923.7	1.83906	2.1499	1.10427	up
