# Supplementary material for: Elucidating the Differentiation Synthesis Mechanisms of Differently Colored Resistance Quinoa Seedings Using Metabolite Profiling and Transcriptome Analysis
Source: Metabolites. 2023 Oct 10;13(10):1065. doi: 10.3390/metabo13101065 (PMC10609267; doi:10.3390/metabo13101065)
Supplement: Supplementary file 1 [file metabolites-13-01065-s001.zip › Table S14.xlsx]

## Sheet: ALL
Index	Formula	Compounds	物质	Class I	物质一级分类	Class II	物质二级分类	CAS	Level	R-R_vs_R-W	R-R_vs_R-Y	R-R_vs_R-B	R-W_vs_R-Y	R-W_vs_R-B	R-Y_vs_R-B	R-R1	R-R2	R-R3	R-W1	R-W2	R-W3	R-Y1	R-Y2	R-Y3	R-B1	R-B2	R-B3	cpd_ID	kegg_map
pme0282	C8H6O4	Phthalic acid	邻苯二甲酸	Organic acids	有机酸	Organic acids	有机酸	88-99-3	A	FALSE	FALSE	down	FALSE	FALSE	FALSE	157080	100670	171540	105360	178620	114000	68547	98641	65126	69464	80714	49210	C01606	ko01100,ko02010
mws0183	C7H6O4	3,4-Dihydroxybenzoic acid (Protocatechuic acid)*	3,4-二羟基苯甲酸; 原儿茶酸*	Phenolic acids	酚酸类	Phenolic acids	酚酸类	99-50-3	A	down	FALSE	FALSE	up	up	FALSE	87331	109190	96513	21305	28042	15342	41818	61613	65303	51528	45674	206390	C00230	ko01100,ko01110
Zmyn002919	C8H8O2	2-Methylbenzoic acid	2-甲基苯甲酸	Phenolic acids	酚酸类	Phenolic acids	酚酸类	118-90-1	B	down	down	down	down	FALSE	FALSE	9002.9	11604	14551	4702.1	4758.7	3420.3	3087.9	422.1	1737	1425.7	2914.9	2585.5	C07215	ko01100
Lmbn001930	C7H6O2	2-Hydroxybenzaldehyde (Salicylaldehyde)	2-羟基苯甲醛 (水杨醛)	Phenolic acids	酚酸类	Phenolic acids	酚酸类	90-02-8	B	FALSE	FALSE	down	FALSE	FALSE	FALSE	51779	36896	53394	35318	47550	41917	29814	38405	21311	24293	32505	12698	C06202	ko01100
pme0281	C8H6O4	Terephthalic acid	对苯二甲酸	Phenolic acids	酚酸类	Phenolic acids	酚酸类	100-21-0	A	FALSE	down	down	FALSE	down	FALSE	1052000	948110	1170800	634870	908490	618890	360420	464450	328600	338810	429710	117260	C06337	ko01100
mws0208	C6H10O4	Adipic Acid*	己二酸*	Organic acids	有机酸	Organic acids	有机酸	124-04-9	B	FALSE	down	down	down	down	FALSE	992240	664080	647270	1136800	1605000	827540	340330	483310	293610	370050	437150	225650	C06104	ko01100
pmn001606	C20H38O2	Eicosenoic acid	二十碳烯酸	Lipids	脂质	Free fatty acids	游离脂肪酸	26764-41-0	A	FALSE	FALSE	FALSE	FALSE	up	FALSE	720230	1599400	807180	777760	288680	707870	766930	923610	1426300	1057900	1288100	1256700	C16526	ko01040
mws0458	C8H8O3	Vanillin	香草醛	Phenolic acids	酚酸类	Phenolic acids	酚酸类	121-33-5	B	down	FALSE	FALSE	up	up	FALSE	316460	239060	288770	16679	44362	45089	139460	190800	273390	233680	178480	333470	C00755	ko00998,ko01100,ko01110
Lmbp000123	C6H13NO2S	L-Homomethionine	L-高甲硫氨酸	Amino acids and derivatives	氨基酸及其衍生物	Amino acids and derivatives	氨基酸及其衍生物	25148-30-5	B	down	down	down	down	down	FALSE	681820	312540	621920	87365	155730	295490	39607	29813	18575	20514	77809	78354	C17213	ko00966,ko01110,ko01210
mws1138	C24H26N2O13	Betanin (Betanidin-5-O-glucoside)	甜菜红苷 (甜菜苷-5-O-葡萄糖苷)	Alkaloids	生物碱	Alkaloids	生物碱	7659-95-2	B	down	down	FALSE	up	up	FALSE	61594	57765	66809	2526.2	5640.2	3031.5	49413	17899	5337	14514	131880	22748	C08540	ko00965,ko01110
Hmgn001653	C7H6O3	Protocatechualdehyde*	原儿茶醛*	Phenolic acids	酚酸类	Phenolic acids	酚酸类	139-85-5	B	FALSE	FALSE	down	FALSE	down	down	3247000	1120500	2022100	1115500	4404100	1593600	1557100	771500	568100	220500	340290	184220	C16700	ko00950
mws2209	C21H20O11	Kaempferol-3-O-glucoside (Astragalin)	山奈酚-3-O-葡萄糖苷(紫云英苷)(黄芪苷)	Flavonoids	黄酮	Flavonols	黄酮醇	480-10-4	B	up	down	down	down	down	FALSE	4500500	3289500	4924000	6709400	10585000	12832000	3370800	618780	383330	838540	1912000	536930	C12249	ko00944,ko01110
Lmsn002815	C27H30O15	Kaempferol-3-O-rutinoside(Nicotiflorin)*	山奈酚-3-O-芸香糖苷(烟花苷)*	Flavonoids	黄酮	Flavonoid	黄酮	17650-84-9	A	up	up	up	down	down	FALSE	496360	739770	972130	3995000	4965400	5280600	1419100	1440300	3902500	1365500	2090200	2504400	C21833	ko00944,ko01110
mws0091	C21H20O12	Quercetin-3-O-glucoside (Isoquercitrin)*	槲皮素-3-O-葡萄糖苷(异槲皮苷)*	Flavonoids	黄酮	Flavonols	黄酮醇	482-35-9	A	down	up	FALSE	up	up	down	787620	909670	647090	47499	24988	31777	3077700	1189600	1273900	623740	1055900	621530	C05623	ko00944,ko01100,ko01110
mws0059	C27H30O16	Quercetin-3-O-rutinoside (Rutin)	槲皮素-3-O-芸香糖苷 (芦丁)	Flavonoids	黄酮	Flavonols	黄酮醇	153-18-4	A	down	FALSE	FALSE	up	up	FALSE	1241300	1333000	1219600	22462	18558	27701	1539300	1365500	1443300	1200600	1268100	1256900	C05625	ko00944,ko01100,ko01110
mws0045	C21H20O11	Quercetin-3-O-rhamnoside(Quercitrin)	槲皮素-3-O-鼠李糖苷(槲皮苷)	Flavonoids	黄酮	Flavonols	黄酮醇	522-12-3	B	down	down	down	FALSE	up	up	383920	235480	303030	9	9	9	21135	9	9	41896	60604	29571	C01750	ko00944
mws0913	C21H20O11	Kaempferol-3-O-galactoside (Trifolin)	山奈酚-3-O-半乳糖苷(三叶豆苷)	Flavonoids	黄酮	Flavonols	黄酮醇	23627-87-4	B	down	FALSE	FALSE	up	up	FALSE	120950	93007	77013	13955	30359	21714	191690	125880	124680	50685	164900	54817	C12626	ko00944
Lmjp002596	C26H28O16	Quercetin-3-O-sambubioside	槲皮素-3-O-桑布双糖苷	Flavonoids	黄酮	Flavonols	黄酮醇	83048-35-5	A	down	FALSE	FALSE	up	up	FALSE	752730	858200	868650	12071	26853	28696	1277100	1691200	1562700	1083400	1837200	1204200	C12637	ko00944
Lmtp003677	C27H30O17	Quercetin-3-O-sophoroside (Baimaside)	槲皮素-3-O-槐糖苷(白麻苷)	Flavonoids	黄酮	Flavonols	黄酮醇	18609-17-1	B	down	FALSE	FALSE	up	up	down	31677	35542	49400	4618.2	9	9	96100	61466	49597	27636	27135	27068	C12667	ko00944
Hmcp001618	C32H38O20	Quercetin-3-O-(2''-O-Xylosyl)rutinoside	槲皮素-3-O-(2''-O-木糖基)芸香糖苷	Flavonoids	黄酮	Flavonols	黄酮醇	129235-39-8	B	down	FALSE	FALSE	up	up	FALSE	47203	30968	43993	9	9	9	57041	60481	42230	47131	60249	48097	C10175	ko00944
mws0051	C16H12O5	Acacetin	金合欢素	Flavonoids	黄酮	Flavonoid	黄酮	480-44-4	B	FALSE	down	FALSE	FALSE	FALSE	FALSE	275940	1070500	948950	821060	117970	912160	221940	209890	126490	141540	554040	268080	C01470	ko00944
Lmmn004912	C16H12O7	3-O-Methylquercetin	3-O-甲基槲皮素	Flavonoids	黄酮	Flavonols	黄酮醇	1486-70-0	B	FALSE	FALSE	up	FALSE	up	up	2381.7	5810.8	3369.5	4791.4	2664.4	5218.7	5594.1	1672	3274.5	9059.6	5923.5	18029	C04443	ko00944
mws0919	C21H20O10	Kaempferol-3-O-rhamnoside (Afzelin)	山奈酚-3-O-鼠李糖苷 (阿福豆苷)	Flavonoids	黄酮	Flavonols	黄酮醇	482-39-3	A	FALSE	down	down	down	down	FALSE	77962	39973	45821	37332	63849	52065	4006.2	9	9	9	14293	2277.1	C16911	ko00944
mws0047	C27H30O14	Apigenin-7-O-neohesperidoside (Rhoifolin)	芹菜素-7-O-新橙皮糖苷 (野漆树苷)	Flavonoids	黄酮	Flavonoid	黄酮	17306-46-6	B	FALSE	FALSE	down	FALSE	FALSE	FALSE	60804	49385	54581	35303	50194	37921	25498	39137	41737	17405	45029	19214	C12627	ko00944
Lmyn001269	C27H30O16	Kaempferol-3-O-sophoroside	山奈酚-3-O-槐糖苷 (槐属黄酮苷)	Flavonoids	黄酮	Flavonoid	黄酮	19895-95-5	B	FALSE	FALSE	up	FALSE	up	up	592550	396070	564030	516810	653180	369670	729980	366930	383700	1157500	1102400	903600	C12634	ko00944
pme2459	C21H20O11	Luteolin-7-O-glucoside (Cynaroside)	木犀草素-7-O-葡萄糖苷 (木犀草苷)	Flavonoids	黄酮	Flavonoid	黄酮	5373-11-5	A	up	up	up	down	FALSE	FALSE	165020	195660	163810	4450000	3165000	2633900	2672200	1186400	374480	1067100	4062800	1148700	C03951	ko00944
mws4167	C21H18O12	Luteolin-7-O-glucuronide	木犀草素-7-O-葡萄糖醛酸苷	Flavonoids	黄酮	Flavonoid	黄酮	29741-10-4	A	up	FALSE	FALSE	down	down	down	3330800	2653000	2945900	17339000	16565000	15231000	5438900	2935200	3433700	1368600	1799200	1457700	C03515	ko00944
pmp001079	C27H30O15	Luteolin-7-O-neohesperidoside (Lonicerin)*	木犀草素-7-O-新橘皮糖苷 (忍冬苷)*	Flavonoids	黄酮	Flavonoid	黄酮	25694-72-8	A	up	up	up	down	FALSE	FALSE	9193.2	14448	3775.7	221730	133500	102020	91677	37728	23096	53170	156040	48280	C12630	ko00944
mws2118	C21H24O10	Phloretin-2'-O-glucoside (Phlorizin)	根皮苷	Flavonoids	黄酮	Chalcones	查耳酮	60-81-1	A	FALSE	FALSE	FALSE	FALSE	FALSE	down	230170	266730	202950	314010	258980	351180	446860	392430	387830	189780	181830	176100	C01604	ko00941,ko01110
mws0044	C15H12O7	Dihydroquercetin(Taxifolin)	二氢槲皮素(花旗松素)	Flavonoids	黄酮	Dihydroflavonol	二氢黄酮醇	480-18-2	B	down	FALSE	FALSE	up	up	FALSE	19018	34956	44948	9	9	9	30992	27193	11147	44609	62399	28313	C01617	ko00941,ko01100,ko01110
mws1094	C15H12O6	Aromadendrin (Dihydrokaempferol)	香橙素 (二氢山奈酚)	Flavonoids	黄酮	Dihydroflavonol	二氢黄酮醇	480-20-6	B	up	FALSE	FALSE	down	down	down	5844	7158.2	7544.7	23530	27563	20730	7415.9	7019.8	8358.8	1860.7	6093.9	3375.9	C00974	ko00941,ko01100,ko01110
pme2954	C15H10O7	Quercetin	槲皮素	Flavonoids	黄酮	Flavonols	黄酮醇	117-39-5	A	down	down	down	FALSE	up	FALSE	896420	700820	811360	87570	36640	56787	106670	97215	55952	155420	205590	149960	C00389	ko00941,ko00944,ko01100,ko01110
mws1068	C15H10O6	Kaempferol (3,5,7,4'-Tetrahydroxyflavone)	山奈酚	Flavonoids	黄酮	Flavonols	黄酮醇	520-18-3	A	FALSE	down	down	down	down	FALSE	421150	329740	435890	746400	726760	862770	73036	39193	31147	53857	117310	39156	C05903	ko00941,ko00944,ko01100,ko01110
pme0376	C15H12O5	Naringenin (5,7,4'-Trihydroxyflavanone)	柚皮素	Flavonoids	黄酮	Dihydroflavone	二氢黄酮	480-41-1	A	FALSE	FALSE	down	down	down	FALSE	48556	51882	57019	71031	78951	64544	49155	26538	26545	18388	20735	13433	C00509	ko00941,ko00943,ko01100,ko01110
mws1174	C17H14O6	3-O-Acetylpinobanksin	3-O-乙酰短叶松黄烷酮	Flavonoids	黄酮	Dihydroflavonol	二氢黄酮醇	52117-69-8	A	down	FALSE	FALSE	FALSE	FALSE	FALSE	312.58	12459	22017	4070.1	9	9	9	3302.6	4552.8	27003	9	9	C16418	ko00941
Lmzp002365	C22H24O11	Hesperetin-7-O-glucoside	橙皮素-7-O-葡萄糖苷	Flavonoids	黄酮	Flavonoid	黄酮	31712-49-9	B	FALSE	FALSE	FALSE	up	up	down	5949700	3315500	9	103680	42212	76506	974360	1316300	904850	511460	612580	445710	C16422	ko00941
mws2212	C9H8O4	Caffeic acid	咖啡酸	Phenolic acids	酚酸类	Phenolic acids	酚酸类	331-39-5	A	down	down	down	FALSE	FALSE	FALSE	3181200	861590	2263400	436900	1329500	819360	1260200	622350	463370	488900	401830	410920	C01197	ko00940,ko01100,ko01110
mws0014	C10H10O4	Ferulic acid	阿魏酸	Phenolic acids	酚酸类	Phenolic acids	酚酸类	537-98-4	A	down	down	down	FALSE	FALSE	up	21064000	5506400	12873000	787950	3046200	2570100	975870	1723800	1285600	4419000	2350600	2244300	C01494	ko00940,ko01100,ko01110
mws0009	C10H10O3	Coniferaldehyde	松柏醛	Phenolic acids	酚酸类	Phenolic acids	酚酸类	20649-42-7	B	FALSE	up	up	up	up	FALSE	52775	66320	72851	26800	16015	62845	99813	187610	145930	222170	137620	203960	C02666	ko00940,ko01100,ko01110
pme3443	C11H12O4	Sinapinaldehyde	芥子醛	Phenolic acids	酚酸类	Phenolic acids	酚酸类	4206-58-0	B	FALSE	FALSE	up	FALSE	up	FALSE	11157	9313.6	9263.5	8172.7	8718.9	11385	14842	14220	10249	23200	19886	22774	C05610	ko00940,ko01100,ko01110
mws0853	C11H14O4	Sinapyl alcohol	芥子醇	Phenolic acids	酚酸类	Phenolic acids	酚酸类	537-33-7	B	FALSE	FALSE	up	FALSE	FALSE	FALSE	9	2681.1	1550.5	2687.3	3038.5	11552	3448	14273	10759	9980.8	9196.4	15260	C02325	ko00940,ko01100,ko01110
mws0011	C17H24O9	Syringin	紫丁香苷	Phenolic acids	酚酸类	Phenolic acids	酚酸类	118-34-3	B	FALSE	up	FALSE	up	FALSE	down	39764	29988	12950	38911	37058	49991	572180	1009800	549230	186660	29046	111180	C01533	ko00940
pme3154	C6H12O4	Mevalonic acid	3,5-二羟基-3-甲基戊酸	Organic acids	有机酸	Organic acids	有机酸	150-97-0	B	FALSE	up	up	up	FALSE	FALSE	163780	144700	306880	221800	280300	478620	386770	964220	1011800	410840	528230	375880	C00418	ko00900,ko01100,ko01110
Zmjn001813	C7H12O4	Pimelic acid*	庚二酸*	Organic acids	有机酸	Organic acids	有机酸	111-16-0	B	FALSE	up	up	up	up	FALSE	17555	17102	13911	20967	31784	19466	132640	48714	49176	74203	52969	146100	C02656	ko00780,ko01100
pme1261	C9H19NO4	D-Panthenol	D-泛酰醇	Others	其它类	Saccharides and Alcohols	糖及醇类	81-13-0	B	FALSE	up	FALSE	FALSE	FALSE	FALSE	17971	6989.4	10753	23956	12551	105390	23540	56027	249990	117220	69573	5385.5	C05944	ko00770
mws0675	C11H15N2O8P	β-Nicotinamide mononucleotide	β-烟酰胺单核苷酸	Nucleotides and derivatives	核苷酸及其衍生物	Nucleotides and derivatives	核苷酸及其衍生物	1094-61-7	B	FALSE	down	down	down	down	FALSE	647470	234920	559410	250030	970870	473850	82102	122180	83320	214550	124040	74499	C00455	ko00760,ko01100
pma3101	C11H14NO6+	Nicotinate D-ribonucleoside	烟酸核糖核苷	Others	其它类	Vitamin	维生素	17720-18-2	B	FALSE	down	down	down	down	FALSE	3042100	742170	1367700	519270	1818100	1995400	635630	465030	314860	415140	429740	432410	C05841	ko00760,ko01100
pme1137	C6H5NO3	6-Hydroxynicotinic acid	6-羟基烟酸	Alkaloids	生物碱	Alkaloids	生物碱	5006-66-6	B	FALSE	up	FALSE	up	FALSE	down	20753	25761	38807	32087	54367	27310	132180	83059	42942	17810	33155	25654	C01020	ko00760,ko01100
Zmjp000624	C8H9NO3	Pyridoxal	吡哆醛	Others	其它类	Vitamin	维生素	66-72-8	A	up	FALSE	FALSE	FALSE	down	FALSE	129330	113870	102140	226490	240270	229040	95589	134070	130630	116980	151530	79029	C00250	ko00750,ko01100
pmb0764	C6H9NOS	4-Methyl-5-thiazoleethanol	4-甲基-5-噻唑乙醇	Others	其它类	Others	其它	137-00-8	B	FALSE	up	up	FALSE	FALSE	FALSE	1943.3	3420.2	4375.2	4630	4715.5	6700.1	5622	10578	4681.1	7887.7	11522	8794	C04294	ko00730,ko01100
pmb2791	C18H30O4	9-Hydroperoxy-10E,12,15Z-octadecatrienoic acid	9-羟基过氧-10E,12,15Z-十八碳三烯酸	Lipids	脂质	Free fatty acids	游离脂肪酸	111004-08-1	A	FALSE	down	FALSE	FALSE	FALSE	up	107730	325870	192350	366440	433580	74059	119190	93157	60192	265360	284800	141380	C16321	ko00592,ko01110
Zmyn004548	C18H28O3	12-Oxo-phytodienoic acid	12-氧-植物二烯酸	Lipids	脂质	Free fatty acids	游离脂肪酸	85551-10-6	B	FALSE	FALSE	down	FALSE	down	FALSE	17283	4395	9573.9	3693.5	8749.9	11500	2597.5	3199.5	6971.4	4301	1986.4	2679.9	C01226	ko00592,ko01100,ko01110
mws0367	C18H30O2	α-Linolenic Acid*	α-亚麻酸*	Lipids	脂质	Free fatty acids	游离脂肪酸	463-40-1	A	FALSE	FALSE	down	FALSE	FALSE	FALSE	28308000	15863000	23776000	13449000	21183000	25330000	16790000	13447000	15140000	12367000	9510000	9177700	C06427	ko00592,ko01040,ko01100,ko01110
pmb2786	C18H30O3	9-Hydroxy-10,12,15-octadecatrienoic acid*	9-羟基-10,12,15-十八碳三烯酸*	Lipids	脂质	Free fatty acids	游离脂肪酸	89886-42-0	B	FALSE	FALSE	down	FALSE	down	FALSE	25601	9074.9	18699	9605.4	18656	22042	11239	9486.7	13988	7995.5	6650.3	8035.1	C16326	ko00592
Zmpn003368	C18H30O3	13S-Hydroxy-9Z,11E,15Z-octadecatrienoic acid	13S-羟基-9Z,11E,15Z-十八碳三烯酸	Lipids	脂质	Free fatty acids	游离脂肪酸	87984-82-5	B	FALSE	FALSE	up	FALSE	up	up	125380	81260	79466	78333	99422	321360	167820	164990	121400	427970	263620	680950	C16316	ko00592
mws0366	C18H30O2	γ-Linolenic Acid*	γ-亚麻酸*	Lipids	脂质	Free fatty acids	游离脂肪酸	506-26-3	A	FALSE	FALSE	down	FALSE	FALSE	FALSE	30900000	18204000	22934000	14514000	22982000	26985000	17913000	14204000	15197000	13738000	10072000	10290000	C06426	ko00591,ko01040,ko01100
Lmbn005923	C18H30O2	Crepenynic acid	顺式十八碳-9-烯-12-炔酸	Lipids	脂质	Free fatty acids	游离脂肪酸	2277-31-8	A	FALSE	FALSE	down	FALSE	FALSE	FALSE	459140	256350	364380	231310	351460	402230	266000	205760	230860	211670	154990	163830	C07289	ko00591
Lmbn006152	C18H32O2	(9Z,11E)-Octadecadienoic acid	(9Z,11E)-十八碳二烯酸	Lipids	脂质	Free fatty acids	游离脂肪酸	2540-56-9	B	FALSE	FALSE	down	FALSE	down	FALSE	35482	17552	28547	22335	29359	33619	25031	17215	15900	15016	13073	10986	C04056	ko00591
Lmbn005443	C18H30O3	13-KODE; (9Z,11E)-13-Oxooctadeca-9,11-dienoic acid*	13-氧代十八碳-9,11-二烯酸*	Lipids	脂质	Free fatty acids	游离脂肪酸	54739-30-9	B	FALSE	FALSE	down	FALSE	down	FALSE	25669	10951	17504	10353	19078	19285	10412	10184	11362	9070.4	5687.4	8807	C14765	ko00591
Lmbn004685	C18H32O4	5S,8R-DiHODE; (5S,8R,9Z,12Z)-5,8-Dihydroxyoctadeca-9,12-dienoate	5,8-二羟基-9,12-十八碳二烯酸	Lipids	脂质	Free fatty acids	游离脂肪酸	-	A	FALSE	FALSE	FALSE	down	FALSE	up	8181.4	34458	14858	27147	80233	9814.6	8562.6	6687.7	5801.9	18349	16791	13233	C20186	ko00591
Lmbn003970	C18H34O5	9,12,13-TriHOME; 9(S),12(S),13(S)-Trihydroxy-10(E)-octadecenoic acid	9(S),12(S),13(S)-三羟基-10(E)-十八烯酸	Lipids	脂质	Free fatty acids	游离脂肪酸	97134-11-7	A	FALSE	FALSE	up	FALSE	up	up	29783	28959	26339	27084	33932	30417	37023	49249	36418	85452	86039	92280	C14833	ko00591
mws0704	C2H8NO4P	O-Phosphorylethanolamine	磷酸乙醇胺	Alkaloids	生物碱	Alkaloids	生物碱	1071-23-4	B	down	down	FALSE	FALSE	FALSE	FALSE	73279	75569	81379	32519	18508	27283	29768	48349	33072	39262	27512	64017	C00346	ko00564,ko00600,ko01100
mws0120	C8H20NO6P	Choline Alfoscerate	甘磷酸胆碱 GPC	Lipids	脂质	PC	磷脂酰胆碱	28319-77-9	B	up	down	down	down	down	FALSE	85955	121870	108270	418570	449420	281720	34629	46841	20055	46582	68423	25115	C00670	ko00564,ko00565
pmp000509	C6H6O3	Maltol	麦芽酚	Others	其它类	Others	其它	118-71-8	B	down	down	down	down	down	up	804920	702230	841980	196710	243050	274520	9	9	9	58213	67571	55135	C11918	ko00523,ko01110
mws4174	C8H15NO6	N-Acetyl-D-mannosamine	N-乙酰-D-甘露糖胺	Others	其它类	Saccharides and Alcohols	糖及醇类	7772-94-3	B	FALSE	FALSE	FALSE	FALSE	down	FALSE	34373	19672	36585	32381	63148	49318	33996	31537	14823	16316	16840	26875	C00645	ko00520,ko01100
Zmyn000110	C6H14NO8P	D-Glucosamine 1-phosphate	D-氨基葡萄糖-1-磷酸	Others	其它类	Saccharides and Alcohols	糖及醇类	2152-75-2	B	FALSE	down	FALSE	down	FALSE	FALSE	56314	53433	80795	80312	67747	101390	22674	52516	17403	49390	59815	37133	C06156	ko00520,ko01100
mws0264	C12H22O11	D-Trehalose*	D-海藻糖*	Others	其它类	Saccharides and Alcohols	糖及醇类	99-20-7	A	FALSE	up	FALSE	FALSE	FALSE	FALSE	165000	279740	305270	661080	116820	203270	799300	426500	453160	324420	426390	700200	C01083	ko00500,ko01100,ko01110,ko02010
mws0866	C6H13O9P	D-Glucose 6-phosphate*	D-葡萄糖-6-磷酸*	Others	其它类	Saccharides and Alcohols	糖及醇类	56-73-5	A	FALSE	down	FALSE	FALSE	FALSE	FALSE	5852800	5965100	6183900	4266400	3963100	3273000	2396600	2778900	1845100	3678500	2685400	3851900	C00092	ko00500,ko00562,ko00998,ko01100,ko01110
pmb0302	C2H8NO3P	2-Aminoethylphosphonate	2-氨基乙基磷酸酯	Lipids	脂质	Glycerol ester	甘油酯	2041-14-7	B	FALSE	FALSE	FALSE	FALSE	FALSE	up	11263	16312	13654	29612	14802	20238	18395	10949	13272	13254	30403	43905	C03557	ko00440,ko01100,ko02010
pme1651	C10H9NO2	Indole 3-acetic acid (IAA)	吲哚-3-乙酸	Alkaloids	生物碱	Plumerane	吲哚类生物碱	87-51-4	B	FALSE	FALSE	down	FALSE	FALSE	FALSE	33930	35386	33848	31741	35885	19126	20544	17709	13801	18744	15868	8937	C00954	ko00380,ko01100,ko04075
pme3083	C8H7NO3	2-(Formylamino)benzoic acid	2-(甲酰氨基)苯甲酸	Phenolic acids	酚酸类	Phenolic acids	酚酸类	3342-77-6	B	FALSE	down	down	down	down	FALSE	433540	135830	268620	191890	435020	466040	116970	100070	108300	121410	86340	96656	C05653	ko00380,ko01100
pmb0774	C10H12N2O	N-Hydroxytryptamine*	N-羟基色胺*	Alkaloids	生物碱	Phenolamine	酚胺	-	A	FALSE	down	down	down	down	down	6059900	5106600	3820900	4116600	4784500	3845200	787860	716050	1589800	237660	463180	400580	C17203	ko00380,ko01100
pme2024	C10H12N2O	Serotonin*	五羟色胺*	Alkaloids	生物碱	Plumerane	吲哚类生物碱	50-67-9	A	FALSE	down	down	down	down	down	7601800	6772800	5234000	5173200	5863800	4746000	1030200	1060500	2053200	255240	561950	490510	C00780	ko00380,ko01100
mws0677	C12H14N2O2	N-Acetyl-5-hydroxytryptamine	N-乙酰-5-羟基色胺	Alkaloids	生物碱	Alkaloids	生物碱	1210-83-9	B	FALSE	down	FALSE	FALSE	FALSE	FALSE	242220	254670	237100	248020	204080	165850	56401	149820	117200	172440	117360	118860	C00978	ko00380,ko01100
mws0596	C7H7NO3	3-Hydroxyanthranilic acid	3-羟基-2-氨基苯甲酸	Organic acids	有机酸	Organic acids	有机酸	548-93-6	B	FALSE	FALSE	FALSE	FALSE	up	FALSE	9	23579	11675	22919	22073	8451.5	20844	31777	29716	39607	24672	54170	C00632	ko00380,ko01100
pme1228	C11H12N2O3	5-Hydroxy-L-tryptophan	5-羟基-L-色氨酸	Amino acids and derivatives	氨基酸及其衍生物	Amino acids and derivatives	氨基酸及其衍生物	56-69-9	A	up	up	FALSE	FALSE	down	down	9	9	9	10651	11053	8836.6	20680	10555	12420	9	9	9	C00643	ko00380,ko01100
mws0005	C10H12N2	Tryptamine	色胺	Alkaloids	生物碱	Plumerane	吲哚类生物碱	61-54-1	A	FALSE	down	down	down	down	down	25655000	12550000	14506000	9835200	23290000	13673000	1286800	1859100	2323700	622890	1305300	769120	C00398	ko00380,ko00901,ko01100,ko01110
mws1078	C7H7NO2	Anthranilic Acid	邻氨基苯甲酸	Phenolic acids	酚酸类	Phenolic acids	酚酸类	118-92-3	B	FALSE	down	FALSE	FALSE	FALSE	FALSE	656190	514570	554190	303700	558820	416750	290120	281880	217480	299230	438300	525690	C00108	ko00380,ko00400,ko00998,ko01058,ko01100,ko01110,ko01230
NK10253223	C8H9NO3	2-Amino-3-methoxybenzoic acid	2-氨基-3-甲氧基苯甲酸	Phenolic acids	酚酸类	Phenolic acids	酚酸类	3177-80-8	B	FALSE	FALSE	FALSE	FALSE	down	FALSE	134110	123300	113110	231680	230530	226930	103630	140170	104550	90668	132970	80014	C05831	ko00380
Zmtn001624	C10H7NO3	N-Acetylisatin	N-乙酰靛红	Alkaloids	生物碱	Plumerane	吲哚类生物碱	574-17-4	A	FALSE	down	FALSE	down	FALSE	up	715670	577770	586490	702140	746890	557250	174350	151290	93713	744650	770610	735130	C02172	ko00380
Zmtn001464	C10H7NO4	4,8-Dihydroxyquinoline-2-carboxylic acid	4,8-二羟基喹啉-2-羧酸	Organic acids	有机酸	Organic acids	有机酸	59-00-7	B	up	up	up	down	down	FALSE	9	3539.9	1797.9	59538	50254	39310	27644	12213	11616	26573	16347	9467.9	C02470	ko00380
Lmbn001364	C5H8O4	4-Hydroxy-2-Oxopentanoic Acid*	4-羟基-2-氧代戊酸*	Organic acids	有机酸	Organic acids	有机酸	3318-73-8	B	FALSE	down	down	FALSE	FALSE	FALSE	235720	162150	296620	79721	187120	116750	76675	141610	50675	62776	102740	18490	C03589	ko00360,ko01100
mws0491	C8H11N	Phenethylamine	2-苯乙胺	Alkaloids	生物碱	Alkaloids	生物碱	64-04-0	A	up	FALSE	FALSE	down	FALSE	up	10039000	9352500	10438000	14804000	41514000	29508000	16134000	7601900	3274900	12793000	37451000	9893000	C05332	ko00360,ko01100
mws0159	C9H8O3	Phenylpyruvic acid	苯丙酮酸	Organic acids	有机酸	Organic acids	有机酸	156-06-9	B	FALSE	FALSE	FALSE	down	FALSE	FALSE	105810	219220	139610	302470	169580	145420	81805	101420	122340	118230	160700	136140	C00166	ko00360,ko00400,ko00960,ko01100,ko01110,ko01210,ko01230
mws0715	C13H16N2O4	Phenylacetyl-L-glutamine	N-苯乙酰基-L-谷氨酰胺	Amino acids and derivatives	氨基酸及其衍生物	Amino acids and derivatives	氨基酸及其衍生物	28047-15-6	B	up	up	up	FALSE	FALSE	FALSE	13894	7843.1	7287.2	18871	31119	15505	35588	15404	12171	24391	20552	26204	C04148	ko00360
ML10179289	C8H10O	2-Phenylethanol	2-苯乙醇	Phenolic acids	酚酸类	Phenolic acids	酚酸类	60-12-8	B	up	FALSE	FALSE	down	FALSE	up	19580000	18542000	21317000	29372000	71299000	52099000	31096000	15435000	6766400	25377000	68203000	19300000	C05853	ko00360
mws0180	C7H6O4	2,5-Dihydroxybenzoic acid; Gentisic Acid*	2,5-二羟基苯甲酸; 龙胆酸*	Phenolic acids	酚酸类	Phenolic acids	酚酸类	490-79-9	A	down	FALSE	FALSE	FALSE	FALSE	FALSE	56864	88284	35424	25741	30532	13132	26881	30285	33434	22252	41674	126490	C00628	ko00350,ko01100
Lmbn001981	C7H6O3	2,5-Dihydroxybenzaldehyde*	2,5-二羟基苯甲醛*	Phenolic acids	酚酸类	Phenolic acids	酚酸类	1194-98-5	B	FALSE	down	down	FALSE	down	down	3295400	1107200	2042400	1085400	4246800	1480900	1387400	779320	598110	132760	313460	210040	C05585	ko00350,ko01100
pme2598	C8H8O4	3,4-Dihydroxybenzeneacetic acid	3,4-二羟基苯乙酸	Phenolic acids	酚酸类	Phenolic acids	酚酸类	102-32-9	B	FALSE	FALSE	down	FALSE	FALSE	FALSE	157300	34407	67755	11075	69229	60900	55582	12247	11202	44769	19517	22611	C01161	ko00350,ko01100
pmb0037	C10H15NO	Hordenine	大麦芽碱	Alkaloids	生物碱	Alkaloids	生物碱	539-15-1	B	FALSE	FALSE	up	FALSE	up	up	486980	596890	554790	534380	176930	210840	197280	345100	302320	1304600	887330	1576100	C06199	ko00350,ko01100
pme1002	C8H11NO	L-Tyramine	L-酪胺	Amino acids and derivatives	氨基酸及其衍生物	Amino acids and derivatives	氨基酸及其衍生物	51-67-2	A	up	FALSE	up	down	FALSE	up	2379100	1896700	1883500	3717500	8199700	5686900	2349500	2465900	1311600	4767400	5616600	4479800	C00483	ko00350,ko00950,ko01100,ko01110
pme3827	C9H11NO4	3,4-Dihydroxy-L-phenylalanine (L-Dopa)	3,4-二羟基-L-苯丙氨酸 (左旋多巴)	Amino acids and derivatives	氨基酸及其衍生物	Amino acids and derivatives	氨基酸及其衍生物	59-92-7	B	FALSE	FALSE	up	FALSE	up	up	16387	26234	19993	21334	16640	13999	29232	17914	19827	97550	259430	121290	C00355	ko00350,ko00950,ko00965,ko01100,ko01110
Lmlp003161	C14H20N2O3	N-Feruloylputrescine	阿魏酰腐胺	Alkaloids	生物碱	Phenolamine	酚胺	501-13-3	B	FALSE	FALSE	down	FALSE	FALSE	down	22723	25301	11388	18081	11904	14262	24220	16554	12102	11851	4400.5	7948.2	C10497	ko00330,ko01100
pme2292	C4H12N2	Putrescine	腐胺	Alkaloids	生物碱	Phenolamine	酚胺	110-60-1	B	FALSE	down	FALSE	down	FALSE	up	103760	37011	52903	48504	96358	91373	18474	24507	22325	56923	83770	15628	C00134	ko00330,ko00472,ko00480,ko00960,ko01100,ko01110,ko02010
pme1841	C5H14N2	Cadaverine	尸胺	Alkaloids	生物碱	Phenolamine	酚胺	462-94-2	B	up	FALSE	up	FALSE	FALSE	FALSE	7716.9	4021.6	4593.8	16163	12261	13391	11250	10097	10076	14433	17881	14749	C01672	ko00310,ko00480,ko00960,ko01100,ko01110
pme0278	C7H14N2O4	2,6-Diaminooimelic acid	2,6-二氨基庚二酸	Amino acids and derivatives	氨基酸及其衍生物	Amino acids and derivatives	氨基酸及其衍生物	583-93-7	B	FALSE	down	FALSE	down	FALSE	up	25094	24816	15402	18992	34169	37768	5503.8	7228.4	3073.9	13220	24878	4945.4	C00666	ko00300,ko01100,ko01110,ko01230
pme0026	C6H14N2O2	L-Lysine	L-赖氨酸	Amino acids and derivatives	氨基酸及其衍生物	Amino acids and derivatives	氨基酸及其衍生物	56-87-1	B	FALSE	FALSE	down	FALSE	FALSE	FALSE	5291600	3239400	4069400	2580200	2803400	3217200	2346600	2621900	1962400	2147900	2023400	1642600	C00047	ko00300,ko00310,ko00780,ko00960,ko00970,ko01100,ko01110,ko01210,ko01230,ko02010
Lmbn001676	C6H10O4	3-Hydroxy-3-Methyl-2-Oxopentanoic Acid	3-羟基-3-甲基-2-氧代戊酸	Organic acids	有机酸	Organic acids	有机酸	-	B	FALSE	down	down	FALSE	FALSE	FALSE	18676	14618	26550	5961.9	19649	11099	5338.1	12289	2270.8	5296.5	12467	2836.7	C14463	ko00290,ko01110,ko01210
Lmbn001609	C6H10O4	2-Acetyl-2-Hydroxybutanoic Acid	2-乙酰-2-羟基丁酸	Organic acids	有机酸	Organic acids	有机酸	-	B	FALSE	down	down	down	down	FALSE	135990	95359	85646	165610	226710	121710	42348	65098	37757	59371	61833	33491	C06006	ko00290,ko01100,ko01110,ko01210,ko01230
Lmbn000216	C5H8O5	3-Methylmalic acid	3-甲基苹果酸	Organic acids	有机酸	Organic acids	有机酸	152204-30-3	A	FALSE	FALSE	down	FALSE	FALSE	FALSE	42849	23045	31280	15637	21194	29410	20620	9783.4	28502	10830	12140	20720	C06032	ko00290,ko00660,ko01100,ko01210,ko01230
Lmbn001288	C5H8O4	2-Hydroxy-2-methyl-3-oxobutanoic acid*	2-羟基-2-甲基-3-氧代丁酸*	Organic acids	有机酸	Organic acids	有机酸	71698-08-3	B	FALSE	down	down	FALSE	FALSE	FALSE	245470	164060	290430	81397	176890	127320	84465	138900	45463	69738	97812	18544	C06010	ko00290,ko00650,ko00660,ko00770,ko01100,ko01110,ko01210,ko01230
mws0823	C5H8O3	3-Methyl-2-Oxobutanoic acid	3-甲基-2-氧代-丁酸	Organic acids	有机酸	Organic acids	有机酸	759-05-7	B	FALSE	down	FALSE	down	FALSE	FALSE	81993	69378	71250	52394	96473	55644	22968	49129	28496	40952	52940	28349	C00141	ko00280,ko00290,ko00770,ko00966,ko01100,ko01110,ko01210,ko01230
pme1086	C10H17N3O6S	Glutathione reduced form	谷胱甘肽还原型	Amino acids and derivatives	氨基酸及其衍生物	Amino acids and derivatives	氨基酸及其衍生物	70-18-8	A	up	FALSE	up	FALSE	up	up	97226	66353	85456	136880	139240	251930	182000	94531	114640	498440	612480	382750	C00051	ko00270,ko00480,ko01100,ko02010
pmb0468	C6H11NO3S	N-Formyl-L-Methionine	N-甲酰-L-蛋氨酸	Amino acids and derivatives	氨基酸及其衍生物	Amino acids and derivatives	氨基酸及其衍生物	4289-98-9	B	FALSE	down	down	down	down	down	208770	159780	114540	125610	158680	126840	24420	22186	59326	11979	17875	15185	C03145	ko00270
pme2890	C8H16N2O4S2	L-Homocystine	L-高胱氨酸	Amino acids and derivatives	氨基酸及其衍生物	Amino acids and derivatives	氨基酸及其衍生物	626-72-2	B	FALSE	FALSE	down	FALSE	down	FALSE	33534	4007.1	16102	6025.6	15571	20820	11725	4306	5131.1	3472.7	3313.7	4596.6	C01817	ko00270
pmb0484	C5H13NO	Choline	胆碱	Alkaloids	生物碱	Alkaloids	生物碱	62-49-7	B	FALSE	FALSE	down	FALSE	down	FALSE	26383000	16152000	25387000	20851000	28952000	26763000	15254000	15319000	14851000	16618000	7203200	5506500	C00114	ko00260,ko00564,ko01100,ko02010
pme2559	C6H9NO5	N-Acetyl-L-Aspartic Acid	N-乙酰-L-天冬氨酸	Amino acids and derivatives	氨基酸及其衍生物	Amino acids and derivatives	氨基酸及其衍生物	997-55-7	A	FALSE	down	FALSE	down	FALSE	FALSE	49759	33743	39601	34519	56545	38458	29785	18140	11627	27093	30974	12659	C01042	ko00250,ko01100
pme1194	C9H13N3O4	2'-Deoxycytidine	2'-脱氧胞苷	Nucleotides and derivatives	核苷酸及其衍生物	Nucleotides and derivatives	核苷酸及其衍生物	951-77-9	B	FALSE	FALSE	FALSE	down	FALSE	FALSE	35035	20425	31932	25048	75122	34935	29048	17174	15161	18374	29529	12420	C00881	ko00240,ko01100,ko02010
pme3732	C9H13N3O5	Cytidine	胞苷	Nucleotides and derivatives	核苷酸及其衍生物	Nucleotides and derivatives	核苷酸及其衍生物	65-46-3	B	FALSE	down	down	FALSE	FALSE	FALSE	1373500	407380	699770	248040	800640	758300	311880	269830	196770	300100	358450	277980	C00475	ko00240,ko01100,ko02010
mws0248	C9H12N2O6	Uridine	尿嘧啶核苷	Nucleotides and derivatives	核苷酸及其衍生物	Nucleotides and derivatives	核苷酸及其衍生物	58-96-8	A	FALSE	down	down	down	FALSE	FALSE	1840000	302320	873320	224070	1557400	998350	197560	187970	156790	313570	347080	121400	C00299	ko00240,ko01100,ko02010
mws0255	C4H5N3O	Cytosine	胞嘧啶	Nucleotides and derivatives	核苷酸及其衍生物	Nucleotides and derivatives	核苷酸及其衍生物	71-30-7	B	FALSE	down	down	down	down	FALSE	10215000	4088000	4845300	2021600	4700000	3757000	1588800	1975900	1433100	645670	2018100	787670	C00380	ko00240,ko01100
pme3188	C9H13N2O9P	Uridine 5'-monophosphate	尿苷 5'-单磷酸	Nucleotides and derivatives	核苷酸及其衍生物	Nucleotides and derivatives	核苷酸及其衍生物	58-97-9	B	FALSE	FALSE	down	FALSE	down	down	1457200	107470	392570	125790	239210	647990	217070	57215	67246	25593	13918	40518	C00105	ko00240,ko01100
pme3961	C10H13N5O3	2'-Deoxyadenosine	2'-脱氧腺苷	Nucleotides and derivatives	核苷酸及其衍生物	Nucleotides and derivatives	核苷酸及其衍生物	958-09-8	A	FALSE	FALSE	FALSE	down	FALSE	FALSE	299520	125110	164360	139800	456530	415830	157470	113670	82190	182630	205030	113820	C00559	ko00230,ko01100,ko02010
pme1178	C10H13N5O5	Guanosine	鸟苷	Nucleotides and derivatives	核苷酸及其衍生物	Nucleotides and derivatives	核苷酸及其衍生物	118-00-3	A	FALSE	down	down	FALSE	FALSE	FALSE	27458000	8689700	15399000	5584300	17904000	14280000	9281600	4215600	3102800	6989200	7708600	3033000	C00387	ko00230,ko01100,ko02010
pme0230	C10H13N5O4	Adenosine	腺苷	Nucleotides and derivatives	核苷酸及其衍生物	Nucleotides and derivatives	核苷酸及其衍生物	58-61-7	A	up	FALSE	FALSE	down	FALSE	up	825350	370120	688850	914010	3795200	2852600	623680	442250	416480	1381300	1325900	774580	C00212	ko00230,ko01100,ko02010
pme0033	C5H4N4O	Hypoxanthine	次黄嘌呤	Nucleotides and derivatives	核苷酸及其衍生物	Nucleotides and derivatives	核苷酸及其衍生物	68-94-0	B	down	down	up	FALSE	up	up	97997	124040	73575	33019	10016	6448.1	14713	35563	46825	380170	375290	458260	C00262	ko00230,ko01100
pme1109	C5H5N5O	Guanine	鸟嘌呤	Nucleotides and derivatives	核苷酸及其衍生物	Nucleotides and derivatives	核苷酸及其衍生物	73-40-5	A	FALSE	down	down	down	down	down	1895200	475940	1031000	301260	986570	1152000	287520	258440	244550	82685	141760	124000	C00242	ko00230,ko01100
mws0609	C10H12N5O7P	Guanosine 3',5'-cyclic monophosphate	鸟苷 3',5'-环单磷酸	Nucleotides and derivatives	核苷酸及其衍生物	Nucleotides and derivatives	核苷酸及其衍生物	7665-99-8	A	FALSE	FALSE	FALSE	down	down	FALSE	178240	60133	136130	108420	178080	293450	82073	56278	109240	67850	60992	83486	C00942	ko00230,ko01100
pmb0998	C10H14N5O8P	Guanosine 5'-monophosphate	鸟苷 5'-单磷酸	Nucleotides and derivatives	核苷酸及其衍生物	Nucleotides and derivatives	核苷酸及其衍生物	85-32-5	A	FALSE	down	down	FALSE	down	FALSE	533200	106960	373760	100150	405720	412080	128080	92439	117610	60168	59868	84534	C00144	ko00230,ko01100
mws0884	C10H12N5O6P	Cyclic 3',5'-Adenylic acid	环-3',5'-腺嘌呤核苷酸	Nucleotides and derivatives	核苷酸及其衍生物	Nucleotides and derivatives	核苷酸及其衍生物	60-92-4	A	up	FALSE	up	down	FALSE	up	73663	38466	62889	119310	435580	327000	80821	52834	49381	187400	183510	100610	C00575	ko00230,ko01100
pme0040	C5H5N5	Adenine	腺嘌呤	Nucleotides and derivatives	核苷酸及其衍生物	Nucleotides and derivatives	核苷酸及其衍生物	73-24-5	A	FALSE	down	down	FALSE	down	down	70529000	27141000	49927000	10931000	31275000	37704000	23427000	14521000	12021000	8318200	9646500	5941000	C00147	ko00230,ko00908,ko01100
mws0668	C10H12N4O6	Xanthosine	黄苷	Nucleotides and derivatives	核苷酸及其衍生物	Nucleotides and derivatives	核苷酸及其衍生物	146-80-5	A	FALSE	FALSE	FALSE	FALSE	up	FALSE	860790	640380	780200	544850	419960	533680	846390	524330	338150	1172800	1316300	555350	C01762	ko00230,ko00232,ko01100,ko01110,ko02010
pmb2657	C10H18N4O6	Argininosuccinic acid	精氨基琥珀酸	Organic acids	有机酸	Organic acids	有机酸	2387-71-5	B	FALSE	down	down	FALSE	FALSE	FALSE	264980	225630	227840	183980	209590	138960	121420	100310	70763	101390	103530	120460	C03406	ko00220,ko00250,ko01100,ko01110,ko01230
pme0193	C5H10N2O3	L-Glutamine	L-谷氨酰胺	Amino acids and derivatives	氨基酸及其衍生物	Amino acids and derivatives	氨基酸及其衍生物	56-85-9	A	FALSE	FALSE	down	FALSE	FALSE	FALSE	4956400	3063200	3894100	2407100	2695400	3150800	2365900	2442200	1834700	2056200	2079700	1605400	C00064	ko00220,ko00230,ko00240,ko00250,ko00630,ko00750,ko00910,ko00970,ko01100,ko01230,ko02010
mws0749	C7H6O3	4-Hydroxybenzoic acid	对羟基苯甲酸	Phenolic acids	酚酸类	Phenolic acids	酚酸类	99-96-7	B	FALSE	FALSE	down	FALSE	down	down	3418100	1110600	2006900	1048900	4082100	1417300	1577700	872090	530140	188580	369970	234240	C00156	ko00130,ko00790,ko01100,ko01110
mws2213	C9H8O2	Cinnamic acid	肉桂酸	Phenolic acids	酚酸类	Phenolic acids	酚酸类	140-10-3	A	FALSE	up	up	up	up	up	6443	3642.1	7247	5057.4	8270.1	18485	15771	34584	32192	61754	50312	53884	C00423	ko00130,ko00360,ko00940,ko00998,ko01100,ko01110
pme1439	C9H8O3	p-Coumaric acid	对香豆酸	Phenolic acids	酚酸类	Phenolic acids	酚酸类	501-98-4	A	FALSE	FALSE	FALSE	down	FALSE	FALSE	1500300	2813200	2972900	5277700	3980600	2601600	846230	1534100	2173100	1998500	2063900	1948300	C00811	ko00130,ko00350,ko00940,ko00950,ko00998,ko01100,ko01110
pme0243	C5H8O4	Glutaric acid	戊二酸	Organic acids	有机酸	Organic acids	有机酸	110-94-1	B	FALSE	down	down	FALSE	FALSE	FALSE	788680	520480	657540	407000	763800	429250	296590	433440	199740	298340	374230	246360	C00489	ko00071,ko00310,ko01100
mws2608	C8H15NO6	N-Acetyl-D-galactosamine	N-乙酰-D-半乳糖胺	Others	其它类	Saccharides and Alcohols	糖及醇类	1811-31-0	B	FALSE	FALSE	FALSE	FALSE	down	FALSE	27786	18511	16338	26771	32087	32270	18292	20631	14248	11162	7546.2	16073	C01132	ko00052,ko01100
mws1080	C12H22O11	Galactinol	肌醇半乳糖苷	Others	其它类	Saccharides and Alcohols	糖及醇类	3687-64-7	A	FALSE	up	up	up	FALSE	FALSE	406000	548720	653240	1429900	349540	459630	2051400	1687900	1419300	1047800	1290400	2055200	C01235	ko00052,ko01100
pme0519	C12H22O11	D-Sucrose*	D-蔗糖*	Others	其它类	Saccharides and Alcohols	糖及醇类	57-50-1	A	FALSE	up	up	up	up	FALSE	182650	244490	262910	605660	190810	212560	895510	835780	808190	556120	606250	1065200	C00089	ko00052,ko00500,ko01100,ko01110,ko02010
pme3313	C6H13O9P	D-Fructose 6-phosphate*	D-果糖-6-磷酸*	Others	其它类	Saccharides and Alcohols	糖及醇类	643-13-0	A	FALSE	down	FALSE	FALSE	FALSE	FALSE	904560	620130	962210	532590	403650	380120	330910	412450	346660	599510	349430	863050	C00085	ko00052,ko00500,ko00710,ko01100,ko01110,ko01200
pme0516	C6H12O6	Inositol	肌醇	Others	其它类	Saccharides and Alcohols	糖及醇类	87-89-8	B	FALSE	FALSE	FALSE	FALSE	down	FALSE	129500	94197	92131	214400	199450	175840	152280	155140	95749	64385	111060	83292	C00137	ko00052,ko00053,ko00562,ko01100,ko01110,ko02010,ko04070
mws0344	C5H10O6	D-Xylonic acid	D-木糖酸	Organic acids	有机酸	Organic acids	有机酸	526-91-0	A	FALSE	FALSE	FALSE	down	down	FALSE	2775500	2214100	2427100	4037500	5216700	4517500	2331800	1545400	997410	1212000	2501800	944840	C00502	ko00040,ko01100
mws1189	C6H10O7	D-Galacturonic acid*	D-半乳糖醛酸*	Organic acids	有机酸	Organic acids	有机酸	685-73-4	B	down	down	FALSE	down	FALSE	up	94319	83303	35350	25146	49642	31359	17387	16874	7560.4	26641	66548	44770	C00333	ko00040,ko00053,ko00520,ko01100,ko02010
pme3705	C6H10O7	D-Glucoronic acid*	D-葡萄糖醛酸*	Others	其它类	Saccharides and Alcohols	糖及醇类	6556-12-3	B	down	down	FALSE	down	FALSE	up	88928	97944	65759	42438	34340	37431	16262	12937	6114.3	42061	63342	59161	C00191	ko00040,ko00053,ko00520,ko00562,ko01100
pme0534	C6H12O7	Gluconic acid	葡萄糖酸	Others	其它类	Saccharides and Alcohols	糖及醇类	526-95-4	A	FALSE	FALSE	down	FALSE	FALSE	FALSE	264040	167160	203170	165130	213420	144420	192830	137500	80515	64319	157470	45775	C00257	ko00030,ko01100,ko01110,ko01200
mws0863	C5H11O7P	2-Deoxyribose-5'-phosphate	2-脱氧核糖-5'-磷酸	Nucleotides and derivatives	核苷酸及其衍生物	Nucleotides and derivatives	核苷酸及其衍生物	102916-66-5	B	FALSE	FALSE	FALSE	down	FALSE	FALSE	24454	35059	21968	21046	52574	22601	14259	21090	9439.9	19409	31748	18461	C00673	ko00030,ko01100
Zmzn000079	C4H9O7P	D-Erythrose-4-phosphate	D-赤藓糖-4-磷酸	Others	其它类	Saccharides and Alcohols	糖及醇类	585-18-2	B	FALSE	down	FALSE	down	FALSE	FALSE	154200	101910	149610	117650	143950	140170	51615	76460	65221	91017	91976	122780	C00279	ko00030,ko00400,ko00710,ko00750,ko00998,ko01100,ko01110,ko01200,ko01230
mws1090	C6H13O9P	Glucose-1-phosphate*	葡萄糖-1-磷酸*	Others	其它类	Saccharides and Alcohols	糖及醇类	59-56-3	A	FALSE	down	FALSE	FALSE	FALSE	FALSE	4720800	4312000	4730800	3462000	3208600	2660200	2166400	2094800	1807300	2955400	2474700	3068600	C00103	ko00010,ko00040,ko00052,ko00500,ko00520,ko00523,ko00561,ko01100,ko01110
Zmgn000447	C3H7O7P	3-Phospho-D-glyceric acid	3-磷酸-D-甘油酸	Others	其它类	Saccharides and Alcohols	糖及醇类	820-11-1	B	down	FALSE	FALSE	FALSE	up	up	1097100	881400	1041000	400160	265740	513640	391760	518150	617290	1096500	460190	2081600	C00197	ko00010,ko00030,ko00260,ko00270,ko00561,ko00630,ko00710,ko01100,ko01110,ko01200,ko01230
mws2125	C3H5O6P	Phosphoenolpyruvate	磷酸烯醇式丙酮酸	Organic acids	有机酸	Organic acids	有机酸	138-08-9	B	down	down	FALSE	FALSE	FALSE	up	290480	296020	424140	133130	84420	169280	74319	116090	162390	396070	129600	835570	C00074	ko00010,ko00020,ko00400,ko00440,ko00620,ko00710,ko00998,ko01100,ko01110,ko01200,ko01230
pme3472	C12H16O7	Arbutin	熊果苷	Phenolic acids	酚酸类	Phenolic acids	酚酸类	497-76-7	B	FALSE	down	down	down	down	FALSE	76222	100240	94333	106980	221360	95393	33686	31739	15330	26051	84458	19898	C06186	ko00010
Lmxp001668	C9H10O2	2-Methoxy-4-ethenylphenol	2-甲氧基-4-乙烯基苯酚	Phenolic acids	酚酸类	Phenolic acids	酚酸类	7786-61-0	A	down	down	FALSE	up	up	up	1589600	1772200	1402700	145100	109600	25633	529010	617560	458980	1559300	1040100	2178400	C17883	--
pme2362	C8H8O3	Mandelic acid	扁桃酸	Phenolic acids	酚酸类	Phenolic acids	酚酸类	90-64-2	B	down	FALSE	FALSE	up	FALSE	down	72062	95616	68364	44417	33312	28606	100870	100070	108520	48027	29240	57140	C01984	--
pme3381	C9H10O3	3-Hydroxyphenylacetic Acid Methyl Ester	3-羟基苯基乙酸甲酯	Phenolic acids	酚酸类	Phenolic acids	酚酸类	42058-59-3	B	down	down	down	up	up	FALSE	10563	15952	19285	1132	1289.4	2851.5	4658.3	11547	6050	5228.9	4257.1	11126	--	--
Hmbp001276	C8H8O4	Gallacetophenone	没食子苯乙酮	Phenolic acids	酚酸类	Phenolic acids	酚酸类	528-21-2	B	down	down	down	down	down	FALSE	202770	258090	258760	125800	132080	97885	7474.6	22208	17536	12513	27598	11335	--	--
Xmgn006542	C10H10O4	Dimethyl Phthalate	邻苯二甲酸二甲酯	Phenolic acids	酚酸类	Phenolic acids	酚酸类	131-11-3	B	down	down	down	FALSE	FALSE	FALSE	80179	107770	101380	51157	15782	19573	42189	32226	29805	37917	31310	24238	C11233	--
mws1212	C11H12O4	Methyl ferulate	阿魏酸甲酯	Phenolic acids	酚酸类	Phenolic acids	酚酸类	2309-07-1	A	down	down	down	FALSE	FALSE	FALSE	8954800	12695000	9944800	4570800	1970500	1615200	2233800	2744100	1825100	2799000	1183800	1977600	--	--
pmb2620	C11H12O4	3,4-Dimethoxycinnamic acid	3,4-二甲氧基肉桂酸	Phenolic acids	酚酸类	Phenolic acids	酚酸类	14737-89-4	A	down	down	down	FALSE	FALSE	FALSE	4325900	6172900	5048200	2135200	1075700	842300	860400	1378800	952120	1403900	517820	1098800	--	--
pmn001669	C12H14O5	Methyl sinapate	芥子酸甲酯	Phenolic acids	酚酸类	Phenolic acids	酚酸类	20733-94-2	A	down	down	down	FALSE	down	FALSE	9285.7	20745	8076.9	9778	5232.2	3164.9	5929.7	3544.5	1362.9	3299.5	1600.8	2354.5	--	--
pmp000086	C13H16O6	1-Feruloyl-sn-glycerol	1-阿魏酰-sn-甘油	Phenolic acids	酚酸类	Phenolic acids	酚酸类	-	B	down	FALSE	FALSE	FALSE	FALSE	FALSE	6360400	5439900	6720400	2786000	2675100	3069900	4681300	4831900	5381100	4611500	2227000	5022900	--	--
Zmhn001926	C13H16O8	1-O-Salicyl-D-glucose	1-O-水杨酰-D-葡萄糖	Phenolic acids	酚酸类	Phenolic acids	酚酸类	60517-74-0	A	down	FALSE	up	FALSE	up	up	25315000	13157000	16059000	7395400	11698000	6249200	26156000	11241000	7502100	44886000	45779000	30565000	--	--
Hmtn001120	C14H20O8	5-(2-Hydroxyethyl)-2-O-glucosylphenol	5-(2-羟乙基)-2-O-葡萄糖基苯酚	Phenolic acids	酚酸类	Phenolic acids	酚酸类	-	A	down	down	up	FALSE	up	up	257410	292060	255340	101270	32517	59252	41626	175240	172100	799750	559210	895860	--	--
Lmtn000940	C14H18O10	1-O-(3,4-Dihydroxy-5-methoxy-benzoyl)-glucoside	1-O-(3,4-二羟基-5-甲氧基-苯甲酰)-葡萄糖苷	Phenolic acids	酚酸类	Phenolic acids	酚酸类	-	B	down	down	up	up	up	up	35947	49272	36500	9277.7	3968.4	6205.9	14749	16861	16763	108370	109940	121150	--	--
Hmmn002544	C16H20O9	Ferulic acid-4-O-glucoside	阿魏酸-4-O-葡萄糖苷	Phenolic acids	酚酸类	Phenolic acids	酚酸类	117405-51-3	A	down	down	down	down	down	FALSE	928760	1189800	1056000	268030	239380	393150	88539	177220	88946	85275	83404	156910	--	--
Zmhn002334	C16H20O9	6-O-Feruloyl-D-glucose	6-O-阿魏酰-D-葡萄糖	Phenolic acids	酚酸类	Phenolic acids	酚酸类	137887-25-3	B	down	down	down	down	down	FALSE	4406600	5492900	5283100	2723400	1760300	1617800	630400	1021800	606170	1400100	425170	836560	--	--
pmb2940	C17H22O10	1-O-Glucosyl sinapate	1-O-葡萄糖基芥子酸	Phenolic acids	酚酸类	Phenolic acids	酚酸类	78185-48-5	B	down	down	down	FALSE	FALSE	FALSE	849110	1484500	1071800	605070	387930	324020	548790	569730	287440	360380	271890	289390	--	--
Cmjn004337	C18H26O10	Benzyl-(2''-O-xylosyl)glucoside	苄基-(2''-O-木糖基)葡萄糖苷	Phenolic acids	酚酸类	Phenolic acids	酚酸类	-	B	down	FALSE	FALSE	FALSE	up	FALSE	26861	48696	41411	24865	12709	13717	10779	37167	49470	54581	46129	53733	--	--
Zmhn002508	C21H28O12	4-p-Cumaroyl-rhamnosyl-(1→6)-D-glucose	4-对香豆酰鼠李糖基-(1→6)-D-葡萄糖	Phenolic acids	酚酸类	Phenolic acids	酚酸类	-	B	down	FALSE	FALSE	up	up	FALSE	14034	15857	16776	9	9	9	39750	52453	3731.1	9058.8	26787	16791	--	--
Zmhn004909	C21H18O13	3,4-Digalloylshikimic acid	3,4-二没食子酰莽草酸	Phenolic acids	酚酸类	Phenolic acids	酚酸类	-	B	down	FALSE	FALSE	up	up	FALSE	91751	133920	109720	13789	13883	15731	115870	102740	71348	96778	85690	68971	--	--
Lmnn002886	C23H26O11	1'-O-(3,4-Dihydroxyphenethyl)-O-caffeoyl-glucoside	1'-O-(3,4-二羟基苯乙基)-O-咖啡酰基-葡萄糖苷	Phenolic acids	酚酸类	Phenolic acids	酚酸类	-	B	down	FALSE	FALSE	up	up	FALSE	27182000	30744000	26740000	3654400	3309100	3588700	30632000	21474000	15856000	20775000	22972000	17247000	--	--
pmb0824	C25H28O13	Syringic acid-4-O-(6''-feruloyl)glucoside	丁香酸-4-O-(6''-阿魏酰)葡萄糖苷	Phenolic acids	酚酸类	Phenolic acids	酚酸类	-	B	down	down	down	down	FALSE	FALSE	157590	163950	171920	35030	34288	44227	20130	20155	12522	39160	10231	20347	--	--
Hmln002149	C29H36O15	Acteoside	毛蕊花糖苷	Phenolic acids	酚酸类	Phenolic acids	酚酸类	61276-17-3	B	down	FALSE	FALSE	up	FALSE	FALSE	10562	8530.2	6505.6	9	9	11479	13275	9541	11665	5794.1	4438.3	9217.5	C10501	--
pmp000001	C16H12O6	Hispidulin (5,7,4'-Trihydroxy-6-methoxyflavone)	高车前素	Flavonoids	黄酮	Flavonoid	黄酮	1447-88-7	B	down	FALSE	FALSE	FALSE	FALSE	FALSE	17722	14977	14103	7888	7118.1	5742	9205.5	4856.2	21168	30075	7859.8	7329.4	C10058	--
Cmsp004086	C16H14O6	Dihydrokaempferide	二氢山奈素	Flavonoids	黄酮	Flavonols	黄酮醇	137225-59-3	B	down	FALSE	FALSE	up	up	FALSE	308620	179310	360430	32542	28892	24411	526750	314980	167910	221780	307640	194990	--	--
mws0066	C16H12O7	Isorhamnetin	异鼠李素	Flavonoids	黄酮	Flavonols	黄酮醇	480-19-3	A	down	down	down	FALSE	up	FALSE	2503700	1857300	2068800	36418	43270	50130	39857	102190	73252	81308	176130	51038	C10084	--
mws2186	C20H18O11	Avicularin(Quercetin-3-O-α-L-arabinofuranoside)	扁蓄苷(广寄生苷)	Flavonoids	黄酮	Flavonols	黄酮醇	572-30-5	A	down	FALSE	down	up	up	FALSE	2845600	1712200	1764000	6415.3	4114.6	363.97	2021500	618300	221300	326780	666670	272340	--	--
Lmdp003509	C20H18O11	Quercetin-3-O-xyloside (Reynoutrin)	槲皮素-3-O-木糖苷 (瑞诺苷)	Flavonoids	黄酮	Flavonols	黄酮醇	549-32-6	B	down	FALSE	down	up	up	FALSE	4106100	683850	2592100	8058.6	7802.2	4769.7	2526500	762260	364820	419060	943140	416500	--	--
Hmcp002316	C21H20O11	Isorhamnetin-3-O-arabinoside	异鼠李素-3-O-阿拉伯糖苷	Flavonoids	黄酮	Flavonols	黄酮醇	-	A	down	down	down	up	up	down	8535900	6706200	5327000	48149	67177	68961	853170	1160600	612720	160740	912930	108090	--	--
HJN086	C21H22O11	Eriodictyol-3'-O-glucoside	圣草酚-3'-O-葡萄糖苷	Flavonoids	黄酮	Dihydroflavone	二氢黄酮	-	B	down	down	FALSE	up	up	FALSE	17047	22312	27933	9	9	1542.6	17200	9350.3	5731.6	30650	6638.7	23886	--	--
Hmcp002539	C22H22O11	Isorhamnetin-3-O-rhamnoside	异鼠李素-3-O-鼠李糖苷	Flavonoids	黄酮	Flavonols	黄酮醇	-	B	down	down	down	FALSE	up	FALSE	2863200	2458000	1866900	7624.3	10076	18094	20175	42577	12070	43338	157260	17147	--	--
pmp000579	C22H22O11	Diosmetin-7-O-galactoside	香叶木素-7-O-半乳糖苷	Flavonoids	黄酮	Flavonoid	黄酮	-	A	down	FALSE	FALSE	FALSE	FALSE	FALSE	496720	496910	487800	228990	218570	231980	479000	295530	206870	245190	300170	413350	--	--
mws1329	C21H20O12	Quercetin-7-O-glucoside*	槲皮素-7-O-葡萄糖苷*	Flavonoids	黄酮	Flavonols	黄酮醇	491-50-9	A	down	up	FALSE	up	up	down	404890	522730	367450	18287	19521	13370	1697700	726790	656380	291680	553570	428160	C12639	--
mws0061	C21H20O12	Quercetin-3-O-galactoside (Hyperin)	槲皮素-3-O-半乳糖苷 (金丝桃苷)	Flavonoids	黄酮	Flavonols	黄酮醇	482-36-0	A	down	up	FALSE	up	up	down	914220	1417200	987530	67859	45321	56894	4843700	1841500	1941000	827570	1998500	1184300	C10073	--
Lmdp003286	C21H20O12	Isohyperoside	异金丝桃苷	Flavonoids	黄酮	Flavonols	黄酮醇	35589-21-0	A	down	FALSE	FALSE	up	up	down	6392800	6172000	5505500	847470	972240	892050	26260000	9475900	6042700	4447700	7794200	5550300	--	--
pme1598	C22H24O11	Hesperetin-5-O-glucoside	橙皮素-5-O-葡萄糖苷	Flavonoids	黄酮	Dihydroflavonol	二氢黄酮醇	69651-80-5	B	down	up	FALSE	up	up	down	616920	870620	623480	36217	24931	26674	2741000	1382900	764750	530540	968680	664790	--	--
Xmsn002700	C21H22O12	Taxifolin-3'-O-glucoside	花旗松素-3'-O-葡萄糖苷	Flavonoids	黄酮	Flavonoid	黄酮	31106-05-5	B	down	FALSE	FALSE	up	up	down	20852	24506	19189	9	9	9	67881	24052	22782	15412	21215	14548	--	--
Lmfn003760	C21H18O13	Quercetin-4′-O-glucuronide	槲皮素-4′-O-葡萄糖醛酸苷	Flavonoids	黄酮	Flavonols	黄酮醇	201463-36-7	A	down	FALSE	FALSE	up	up	FALSE	3884200	3819400	3277000	484820	422690	396430	3594500	2719900	1860300	2503900	2644300	2027100	--	--
Hmjp003123	C21H18O13	Quercetin-5-O-glucuronide	槲皮素-5-O-葡萄糖醛酸苷	Flavonoids	黄酮	Flavonols	黄酮醇	-	B	down	FALSE	FALSE	up	up	FALSE	11934000	10114000	9314300	1245100	863580	890610	11353000	8410600	3516100	7848600	6085900	5736600	--	--
Lmjp003044	C22H22O12	Isorhamnetin-3-O-Glucoside*	异鼠李素-3-O-葡萄糖苷*	Flavonoids	黄酮	Flavonols	黄酮醇	5041-82-7	A	down	FALSE	down	up	up	down	12148000	12687000	10450000	433840	408880	423280	8450200	10174000	6486600	1548900	7953100	1102300	--	--
Hmcp002207	C22H22O12	Isorhamnetin-7-O-glucoside (Brassicin)*	异鼠李素-7-O-葡萄糖苷 (蔓菁苷)*	Flavonoids	黄酮	Flavonols	黄酮醇	6743-96-0	A	down	FALSE	down	up	up	down	11732000	12408000	9892200	458300	380010	403490	8509400	9651600	6467100	1449400	8622200	1106000	--	--
Hmln002199	C23H22O13	Quercetin-3-O-(6''-acetyl)galactoside	槲皮素-3-O-(6''-乙酰)半乳糖苷	Flavonoids	黄酮	Flavonols	黄酮醇	-	B	down	FALSE	FALSE	up	FALSE	FALSE	29197	29987	26805	2966.2	1853.9	9	67592	7041.6	14771	7365.7	67638	5893.7	--	--
Li512111	C24H24O13	Isorhamnetin-3-O-(6''-acetylglucoside)	异鼠李素-3-O-(6''-乙酰)葡萄糖苷	Flavonoids	黄酮	Flavonols	黄酮醇	-	B	down	down	down	up	FALSE	FALSE	55913	76793	64429	2588.5	9	9	7755.1	4139.9	6345.6	9	30461	9	--	--
Hmln002189	C24H22O15	Quercetin-3-O-(6''-malonyl)galactoside	槲皮素-3-O-(6''-丙二酰)半乳糖苷	Flavonoids	黄酮	Flavonols	黄酮醇	-	A	down	FALSE	FALSE	up	up	FALSE	50638	60414	43049	9	9	9	154400	19356	25417	18505	196880	13633	--	--
HJAP064	C25H24O15	Isorhamnetin-3-O-(6''-malonylglucoside)	异鼠李素-3-O-(6''-丙二酰)葡萄糖苷	Flavonoids	黄酮	Flavonoid	黄酮	-	B	down	down	FALSE	up	FALSE	FALSE	311220	291540	279590	18891	10648	14363	119370	56628	63814	18145	332030	34330	--	--
Lmmp003306	C25H26O15	Quercetin-3-O-xylosyl(1→2)arabinoside	槲皮素-3-O-木糖基(1→2)阿拉伯糖苷	Flavonoids	黄酮	Flavonols	黄酮醇	-	A	down	FALSE	FALSE	up	up	FALSE	1749400	1498700	1232900	32109	32363	36613	1350600	1395700	1497800	1452400	1039500	1271300	--	--
Lmnp002741	C27H30O14	Genkwanin-6-C-(2''-O-apiosyl)glucoside	芜花素-6-C-(2''-O-芹糖基)葡萄糖苷	Flavonoids	黄酮	Flavonoid carbonoside	黄酮碳糖苷	-	B	down	down	down	FALSE	up	up	146400	175820	122470	9	9	9	9	9	9	18935	24944	18109	--	--
Hmgp003641	C28H32O14	Chrysoeriol-6-C-rhamnoside-7-O-rhamnoside	金圣草黄素-6-C-鼠李糖苷-7-O-鼠李糖苷	Flavonoids	黄酮	Flavonoid	黄酮	-	B	down	FALSE	FALSE	up	up	FALSE	36602	83414	70771	12988	11137	16137	46335	65920	62663	57564	42199	100020	--	--
pmp001288	C28H32O14	Acacetin-7-O-rutinoside (Linarin)	金合欢素-7-O-芸香糖苷 (蒙花苷)	Flavonoids	黄酮	Flavonoid	黄酮	480-36-4	A	down	FALSE	FALSE	up	up	FALSE	1298300	2763700	2393800	442270	364960	454500	1571300	2299800	2333700	1925200	1319900	3379700	--	--
mws1290	C30H26O13	Kaempferol-3-O-(6''-p-Coumaroyl)glucoside (Tiliroside)	山奈酚-3-O-(6''-对香豆酰)葡萄糖苷 (银锻苷)	Flavonoids	黄酮	Flavonols	黄酮醇	20316-62-5	B	down	FALSE	FALSE	up	up	FALSE	45738	60313	58841	9	9	9	61914	81648	75571	86115	13976	109650	C17140	--
Lmtp004044	C26H28O16	Quercetin-3-O-apiosyl(1→2)galactoside	槲皮素-3-O-芹糖基(1→2)半乳糖苷	Flavonoids	黄酮	Flavonols	黄酮醇	-	B	down	FALSE	FALSE	up	up	FALSE	22354000	18981000	21271000	486360	520990	577600	36182000	38139000	36845000	29638000	33497000	24475000	--	--
Lmmp003091	C27H30O16	Quercetin-3-O-(4''-O-glucosyl)rhamnoside	槲皮素-3-O-(4''-O-葡萄糖基)鼠李糖苷	Flavonoids	黄酮	Flavonols	黄酮醇	59262-54-3	B	down	FALSE	FALSE	up	up	FALSE	218000	143840	127850	5008.5	8681.6	7796	267810	140220	179840	80259	195980	123660	C17563	--
Lmsp004166	C27H30O16	Quercetin-3-O-glucoside-7-O-rhamnoside	槲皮素-3-O-葡萄糖苷-7-O-鼠李糖苷	Flavonoids	黄酮	Flavonols	黄酮醇	-	B	down	FALSE	FALSE	up	up	FALSE	2720200	2949600	2995700	51296	36388	60012	2888000	3555200	3076800	2766200	3670500	3090400	--	--
Lmbp002336	C27H30O16	Quercetin-3-O-(2''-O-rhamnosyl)galactoside	槲皮素-3-O-(2''-O-鼠李糖基)半乳糖苷	Flavonoids	黄酮	Flavonols	黄酮醇	-	B	down	up	up	up	up	FALSE	3291700	4704700	4336900	162950	111300	179410	8716800	9624600	9991800	8316000	9330300	9045200	--	--
Lmjp002461	C27H30O16	Quercetin-3-O-neohesperidoside	槲皮素 3-O-新橘皮糖苷	Flavonoids	黄酮	Flavonols	黄酮醇	117611-67-3	A	down	FALSE	FALSE	up	up	FALSE	2366000	3221700	3116600	57211	41762	55138	3211900	2848600	3083700	2722000	3642500	2801800	--	--
Hmjp002999	C28H32O16	Isorhamnetin-3-O-rutinoside (Narcissin)	异鼠李素-3-O-芸香糖苷 (水仙苷)	Flavonoids	黄酮	Flavonoid	黄酮	604-80-8	B	down	FALSE	FALSE	up	up	FALSE	4415900	3733300	4443200	45029	108530	78898	3932600	4737400	2189000	1580000	5634500	1140200	--	--
Zmxp002867	C28H32O16	Chrysoeriol-5,7-di-O-glucoside	金圣草黄素-5,7-二-O-葡萄糖苷	Flavonoids	黄酮	Flavonoid	黄酮	-	B	down	FALSE	FALSE	up	up	FALSE	194490	134560	214320	31899	15636	58263	213630	131050	132090	78538	88684	191810	--	--
Lmsp004045	C28H32O16	Isorhamnetin-3-O-glucoside-7-O-rhamnoside	异鼠李素-3-O-葡萄糖苷-7-O-鼠李糖苷	Flavonoids	黄酮	Flavonols	黄酮醇	-	A	down	FALSE	FALSE	up	up	FALSE	8974.5	13646	22480	1581.8	5311	4198.5	13111	22721	29185	11578	30163	8430	--	--
pme1540	C28H32O16	Isorhamnetin-3-O-neohesperidoside	异鼠李素-3-O-新橙皮糖苷	Flavonoids	黄酮	Flavonols	黄酮醇	55033-90-4	A	down	FALSE	FALSE	up	up	FALSE	21845	25916	14656	5808.8	4753.5	2077.5	24950	27518	23592	20545	49565	12666	--	--
Lmsp003729	C27H30O17	Myricetin-3-O-rutinoside	杨梅素-3-O-芸香糖苷	Flavonoids	黄酮	Flavonols	黄酮醇	-	B	down	up	up	up	up	FALSE	76104	148110	113890	9	9	9	208030	233110	389080	311020	273070	445350	--	--
Hmlp002975	C28H30O17	Isorhamnetin-3-O-glucuronide-7-O-rhamnoside	异鼠李素-3-O-葡萄糖醛酸苷-7-O-鼠李糖苷	Flavonoids	黄酮	Flavonols	黄酮醇	-	B	down	FALSE	down	up	up	FALSE	441220	362170	365020	7448.2	13143	20425	100860	337700	241310	123760	300870	90901	--	--
Lmmp002560	C27H28O18	Quercetin-3-O-(2''-O-glucosyl)glucuronide	槲皮素-3-O-(2''-O-葡萄糖基)葡萄糖醛酸苷	Flavonoids	黄酮	Flavonols	黄酮醇	-	B	down	FALSE	FALSE	up	up	FALSE	242200	143980	208460	9	9	9	171140	146950	116410	82692	138410	102650	--	--
Hmcp001578	C28H32O17	Isorhamnetin-3,7-O-diglucoside	异鼠李素-3,7-O-二葡萄糖苷	Flavonoids	黄酮	Flavonols	黄酮醇	6758-51-6	B	down	FALSE	FALSE	up	up	down	62465	74053	69959	9	9	9	94839	73497	82040	9	52571	13502	--	--
Lmmp003266	C29H30O19	Quercetin-3-O-(2''-malonyl)glucoside-7-O-arabinoside	槲皮素-3-O-(2''-丙二酰)葡萄糖苷-7-O-阿拉伯糖苷	Flavonoids	黄酮	Flavonols	黄酮醇	-	A	down	FALSE	FALSE	up	up	FALSE	43505	41544	48434	9	9	9	62213	24699	40980	17730	228090	46025	--	--
Xmyp004678	C32H38O19	Kaempferol-3-O-(2-O-Xylosyl-6-O-Rhamnosyl)Glucoside	山奈酚-3-O-(2''-O-木糖基-6''-O-鼠李糖基)葡萄糖苷	Flavonoids	黄酮	Flavonoid	黄酮	-	A	down	up	up	up	up	FALSE	13974	13058	9034.8	9	9	9	132130	104560	60252	90046	134400	72358	--	--
HJAP061	C32H38O20	Quercetin-3-O-(2''-O-arabinosyl)rutinoside	槲皮素-3-O-(2''-O-阿拉伯糖基)芸香糖苷	Flavonoids	黄酮	Flavonols	黄酮醇	-	A	down	FALSE	FALSE	up	up	FALSE	2089800	1123500	2271500	87635	110380	108220	2580200	3001800	3113700	1745600	2663100	2473100	--	--
Lnrp102163	C33H40O20	Quercetin-3-O-rutinoside-7-O-rhamnoside	槲皮素-3-O-芸香糖苷-7-O-鼠李糖苷	Flavonoids	黄酮	Flavonols	黄酮醇	-	A	down	up	up	up	up	FALSE	25632	11608	8902.5	9	4601.2	2548.8	36564	38499	31632	42399	41044	28042	--	--
Hmcp001559	C33H40O20	Isorhamnetin-3-O-rutinoside-7-O-arabinoside	异鼠李素-3-O-芸香糖苷-7-O-阿拉伯糖苷	Flavonoids	黄酮	Flavonols	黄酮醇	-	B	down	down	down	up	up	FALSE	36914	31891	25585	9	9	9	9	5522.5	6825.6	1235.5	6478.6	2916.3	--	--
HJAP127	C33H40O20	Quercetin-3-O-(2''-O-Rhamnosyl)rutinoside	槲皮素-3-O-(2''-O-鼠李糖基)芸香糖苷	Flavonoids	黄酮	Flavonols	黄酮醇	55696-57-6	A	down	up	up	up	up	FALSE	5382000	8708400	7869800	183240	127050	213780	18992000	20721000	16026000	14230000	13578000	18546000	--	--
Hmcp001329	C32H38O21	Quercetin-3-O-xylosyl(1→2)glucosyl(1→2)glucoside	槲皮素-3-O-木糖基(1→2)葡萄糖基(1→2)葡萄糖苷	Flavonoids	黄酮	Flavonols	黄酮醇	-	A	down	up	up	up	up	FALSE	10900	20507	16947	9	9	9	69218	121410	128180	47457	72213	51247	--	--
HJAP128	C34H42O20	Isorhamnetin-3-O-rutinoside-7-O-rhamnoside	异鼠李素-3-O-芸香糖苷-7-O-鼠李糖苷	Flavonoids	黄酮	Flavonoid	黄酮	-	A	down	FALSE	FALSE	up	up	FALSE	981320	1153000	1022000	154860	199240	283860	908160	1824600	1472100	925880	2773000	528480	--	--
HJAP023	C33H40O21	Kaempferol-6,8-di-C-glucoside-7-O-glucoside	山奈酚-6,8-二-C-葡萄糖苷-7-O-葡萄糖苷	Flavonoids	黄酮	Flavonoid	黄酮	-	B	down	up	FALSE	up	up	FALSE	20349	16252	14880	9	9	9	28264	33360	51881	18857	3558.6	50136	--	--
Hmcp001589	C34H42O21	Isorhamnetin-3-O-rutinoside-4'-O-glucoside	异鼠李素-3-O-芸香糖苷-4'-O-葡萄糖苷	Flavonoids	黄酮	Flavonols	黄酮醇	111393-97-6	B	down	FALSE	down	up	up	down	137340	149950	153230	9	9	9	77359	125950	152080	3942.4	63337	18936	--	--
Lmhp003162	C34H42O21	Chrysoeriol-6,8-di-C-glucoside-4'-O-glucoside	金圣草黄素-6,8-二-C-葡萄糖苷-4'-O-葡萄糖苷	Flavonoids	黄酮	Flavonoid	黄酮	-	B	down	FALSE	down	up	FALSE	down	46111	47144	55699	9	9	9	17662	41451	64307	6678.5	9	9	--	--
Lmhp002374	C39H50O25	Quercetin-3-O-glucosyl(1→4)rhamnoside-7-O-rutinoside	槲皮素-3-O-葡萄糖基-(1→4)-鼠李糖苷-7-O-芸香糖苷	Flavonoids	黄酮	Flavonols	黄酮醇	-	B	down	FALSE	FALSE	up	up	FALSE	46702	65998	50323	9	9	9	141210	67296	64886	101190	61971	119250	--	--
HJAP123	C40H52O25	Isorhamnetin-3-O-rutinoside-7-O-rutinoside	异鼠李素-3-O-芸香糖苷-7-O-芸香糖苷	Flavonoids	黄酮	Flavonoid	黄酮	-	A	down	up	up	up	up	FALSE	9083.2	20220	10548	2820.7	261.7	4422.7	56248	89822	77793	35345	83954	38020	--	--
Lmfp001509	C13H16O9	1-O-Galloyl-rhamnose	1-O-没食子酰-鼠李糖	Tannins	鞣质	Tannin	鞣质	-	B	down	down	down	FALSE	FALSE	FALSE	165560	122370	150970	19619	18247	20287	22062	20897	24081	30082	20031	37213	--	--
Lmsp005625	C22H18O13	3-O-Methylellagic acid-4'-O-(5''-O-acetyl)arabinoside	3-O-甲基鞣花酸-4'-O-(5''-O-乙酰)阿拉伯糖苷	Tannins	鞣质	Tannin	鞣质	-	B	down	down	down	FALSE	FALSE	FALSE	9421.3	4583.1	7060.4	9	9	9	9	3511.5	9	9	9	9	--	--
Lmtp001399	C14H17NO7	5,6-Dihydroxyindole-5-O-β-glucoside	5,6-二吲哚乙酸-5-O-β-葡萄糖苷	Alkaloids	生物碱	Alkaloids	生物碱	-	B	down	down	FALSE	FALSE	up	up	143630	168730	125150	9	9	9	9	9	9	187710	253940	178680	--	--
pmb0776	C20H20N2O3	N-Feruloyltryptamine	N-阿魏酰色胺	Alkaloids	生物碱	Phenolamine	酚胺	53905-13-8	A	down	down	down	FALSE	down	down	56322	47291	47998	11837	12252	15735	7493.9	9571.3	20198	1379.6	2200.3	1038.1	--	--
HJAP050	C19H21NO5	N-Feruloyl-3-methoxytyramine	N-阿魏酰-3-甲氧基酪胺	Alkaloids	生物碱	Phenolamine	酚胺	78510-19-7	A	down	FALSE	down	up	FALSE	down	97658	263840	142890	26347	25728	82848	48173	257890	313710	9	129070	9	--	--
Lmhp005872	C25H30N2O6	Diferuloylcadaverine	二阿魏酰尸胺	Alkaloids	生物碱	Phenolamine	酚胺	-	B	down	down	down	FALSE	up	up	42576	46026	34806	9	9	9	9	9	7312	2599.3	20350	5720.5	--	--
Lmrn002746	C6H12O3	2-Hydroxy-4-methylpentanoic acid	2-羟基-4-甲基戊酸	Organic acids	有机酸	Organic acids	有机酸	498-36-2	A	down	down	down	FALSE	FALSE	FALSE	89688	117230	135640	29228	39550	38748	2745.9	44047	33129	46798	28340	47394	--	--
Lmgn002555	C8H14O4	2-Propylglutaric acid	2-丙基戊二酸	Organic acids	有机酸	Organic acids	有机酸	32806-62-5	A	down	down	down	FALSE	FALSE	FALSE	374690	368580	487050	96264	154260	128020	25129	272980	143680	199800	51609	150540	C16658	--
pmd0136	C26H54NO7P	LysoPC 18:0(2n isomer)	溶血磷脂酰胆碱 18:0(2n异构)	Lipids	脂质	LPC	溶血磷脂酰胆碱	-	A	down	down	down	FALSE	FALSE	FALSE	151770	61631	114160	34820	72905	38227	62064	38546	51026	47990	23168	29851	--	--
pme3017	C4H9NO2	2-Aminoisobutyric acid	2-氨基异丁酸	Amino acids and derivatives	氨基酸及其衍生物	Amino acids and derivatives	氨基酸及其衍生物	62-57-7	B	FALSE	FALSE	down	down	down	FALSE	3700300	1767500	3457100	2459900	4501300	3770400	1578800	1496600	1423000	1720400	690670	570290	C03665	--
pme0128	C6H12N2O3	L-Alanyl-L-Alanine	L-丙氨酰-L-丙氨酸	Amino acids and derivatives	氨基酸及其衍生物	Amino acids and derivatives	氨基酸及其衍生物	1948-31-8	B	FALSE	FALSE	FALSE	FALSE	up	up	19218	16275	15035	7475	11465	16295	19296	11590	7613.2	27882	25953	30985	--	--
pme2914	C6H10O5	3-Hydroxy-3-methylpentane-1,5-dioic acid	3-羟基-3-甲基谷氨酸	Amino acids and derivatives	氨基酸及其衍生物	Amino acids and derivatives	氨基酸及其衍生物	503-49-1	A	FALSE	down	FALSE	FALSE	FALSE	FALSE	439170	259750	280690	123320	222950	248980	116910	182480	92052	345320	137300	252910	C03761	--
pme2758	C5H9NO5	4-Hydroxy-L-glutamic acid	4-羟基-L-谷氨酸	Amino acids and derivatives	氨基酸及其衍生物	Amino acids and derivatives	氨基酸及其衍生物	3913-68-6	A	FALSE	down	down	down	FALSE	FALSE	103430	51270	58059	40438	60205	68309	27379	24163	11600	22223	47700	21110	C03079	--
mws0736	C8H16N2O3	N-Glycyl-L-leucine*	N-甘氨酰-L-亮氨酸*	Amino acids and derivatives	氨基酸及其衍生物	Amino acids and derivatives	氨基酸及其衍生物	869-19-2	B	FALSE	down	FALSE	FALSE	FALSE	FALSE	1743800	386190	654140	266020	603260	973600	363910	303910	332100	351650	386700	334710	C02155	--
mws5041	C8H16N2O3	L-Glycyl-L-isoleucine*	L-甘氨酰-L-异亮氨酸*	Amino acids and derivatives	氨基酸及其衍生物	Amino acids and derivatives	氨基酸及其衍生物	19461-38-2	B	FALSE	down	FALSE	FALSE	FALSE	FALSE	1445500	310470	516380	209990	469050	841140	294090	251840	267650	288210	329610	231110	--	--
Zmjp000182	C7H16N4O2	N-Monomethyl-L-arginine	N-单甲基-L-精氨酸	Amino acids and derivatives	氨基酸及其衍生物	Amino acids and derivatives	氨基酸及其衍生物	17035-90-4	B	FALSE	down	FALSE	FALSE	FALSE	FALSE	98643	81061	114740	96000	59188	58548	53128	50765	29681	63517	56572	40242	C03884	--
pme3388	C7H16N4O2	Homoarginine	高精氨酸	Amino acids and derivatives	氨基酸及其衍生物	Amino acids and derivatives	氨基酸及其衍生物	156-86-5	B	FALSE	FALSE	FALSE	up	FALSE	down	14351	1900.2	13222	7843.3	6262.5	12838	9005.2	77169	73484	7856.4	13251	8901.1	C01924	--
pmb2873	C13H13NO2	3-(2-Naphthyl)-L-alanine	3-(2-萘基)-L-丙氨酸	Amino acids and derivatives	氨基酸及其衍生物	Amino acids and derivatives	氨基酸及其衍生物	58438-03-2	B	FALSE	FALSE	FALSE	FALSE	FALSE	down	10595	6800.8	16061	9	28589	12871	10351	10313	19910	7143.5	9	9606.7	--	--
pme0170	C8H16N4O3	N-Acetyl-L-Arginine	N-乙酰-L-精氨酸	Amino acids and derivatives	氨基酸及其衍生物	Amino acids and derivatives	氨基酸及其衍生物	155-84-0	A	FALSE	up	FALSE	FALSE	FALSE	FALSE	16896	20507	15964	23958	13517	18886	41366	35259	31782	30425	33375	39037	--	--
Lmrj001698	C9H18N2O4	L-Seryl-L-Isoleucine	L-丝氨酰-L-异亮氨酸	Amino acids and derivatives	氨基酸及其衍生物	Amino acids and derivatives	氨基酸及其衍生物	91086-51-0	A	FALSE	down	down	FALSE	down	down	2573300	371100	872130	124540	503900	1340800	285910	90017	140370	111770	79194	52642	--	--
mws5042	C11H14N2O3	L-Glycyl-L-phenylalanine	L-甘氨酰-L-苯丙氨酸	Amino acids and derivatives	氨基酸及其衍生物	Amino acids and derivatives	氨基酸及其衍生物	721-66-4	B	FALSE	down	down	FALSE	FALSE	FALSE	700480	159170	295350	114730	194500	385660	172750	120960	124280	159850	132130	125750	--	--
Lmhp001670	C11H22N2O3	L-Valyl-L-Leucine	L-缬氨酰-L-亮氨酸	Amino acids and derivatives	氨基酸及其衍生物	Amino acids and derivatives	氨基酸及其衍生物	3989-97-7	B	FALSE	down	down	FALSE	down	FALSE	2721200	436330	1149000	244170	1005300	1683300	382350	150760	215680	184510	135920	138000	--	--
mws4176	C12H16N2O3	L-Alanyl-L-Phenylalanine	L-丙氨酰-L-苯丙氨酸	Amino acids and derivatives	氨基酸及其衍生物	Amino acids and derivatives	氨基酸及其衍生物	3061-90-3	B	FALSE	down	down	down	down	FALSE	237740	34866	110550	30228	102840	158440	28055	15813	23433	18609	14108	8707	--	--
Lmhp002031	C12H24N2O3	L-Leucyl-L-Leucine	L-亮氨酰-L-亮氨酸	Amino acids and derivatives	氨基酸及其衍生物	Amino acids and derivatives	氨基酸及其衍生物	3303-31-9	B	FALSE	down	down	FALSE	down	FALSE	1242600	246820	668020	129580	501820	795810	199770	115690	143300	105570	117500	97374	--	--
Lmhp002001	C14H20N2O3	L-Valyl-L-Phenylalanine	L-缬氨酰-L-苯丙氨酸	Amino acids and derivatives	氨基酸及其衍生物	Amino acids and derivatives	氨基酸及其衍生物	3918-92-1	B	FALSE	down	down	down	down	FALSE	362700	90740	233270	97327	273850	372230	81431	55016	62377	52632	60922	45324	--	--
mws5035	C15H22N2O3	L-Leucyl-L-phenylalanine	L-亮氨酰-L-苯丙氨酸	Amino acids and derivatives	氨基酸及其衍生物	Amino acids and derivatives	氨基酸及其衍生物	56217-82-4	B	FALSE	down	down	down	down	FALSE	491550	92364	164150	131480	421980	442210	31146	33892	40563	59438	39152	47683	--	--
mws0636	C18H20N2O3	L-Phenylalanyl-L-phenylalanine	L-苯丙氨酰-L-苯丙氨酸	Amino acids and derivatives	氨基酸及其衍生物	Amino acids and derivatives	氨基酸及其衍生物	2577-40-4	A	FALSE	down	down	down	down	FALSE	55708	15768	50554	21526	57554	44436	9233	9448	8990	12060	8418	6322.5	--	--
mws0028	C8H8O4	Vanillic acid	香草酸	Phenolic acids	酚酸类	Phenolic acids	酚酸类	121-34-6	B	FALSE	down	down	FALSE	down	down	430370	161550	261630	47760	393660	83122	116410	44048	40604	10887	26231	18950	C06672	--
pmb2795	C10H10O3	4-Methoxycinnamic acid*	4-甲氧基肉桂酸*	Phenolic acids	酚酸类	Phenolic acids	酚酸类	830-09-1	A	FALSE	FALSE	down	FALSE	FALSE	FALSE	263710	379090	272000	427630	266890	124640	240840	138310	99356	162980	180760	96405	--	--
mws1195	C10H10O3	p-Coumaric acid methyl ester*	对香豆酸甲酯*	Phenolic acids	酚酸类	Phenolic acids	酚酸类	3943-97-3	A	FALSE	down	down	FALSE	FALSE	FALSE	375080	563560	408650	662810	375130	178100	320580	176280	117800	197190	214700	112490	--	--
Lmrn001951	C9H10O4	(S)-2-Hydroxy-3-(4-Hydroxyphenyl)Propanoic Acid	2-羟基-(4-羟基苯基)丙酸	Phenolic acids	酚酸类	Phenolic acids	酚酸类	23508-35-2	B	FALSE	down	FALSE	down	FALSE	up	4035.3	9465	3714.5	10469	7389.5	5677.4	9	9	9	5442.4	7480.1	6949.1	--	--
mws1350	C9H10O4	Syringaldehyde; 4-Hydroxy-3,5-Dimethoxybenzaldehyde	丁香醛; 4-羟基-3,5-二甲氧基苯甲醛	Phenolic acids	酚酸类	Phenolic acids	酚酸类	134-96-3	B	FALSE	FALSE	FALSE	FALSE	up	FALSE	9	2407.3	9	9	9	9	9	9	5526.1	8105.6	9	4862.4	--	--
Lmdn003756	C10H10O4	Methyl caffeate	咖啡酸甲酯	Phenolic acids	酚酸类	Phenolic acids	酚酸类	3843-74-1	A	FALSE	down	up	down	up	up	129220	91156	86142	96931	170920	431690	37905	3744.5	2155.8	1831400	1789400	1190500	C10477	--
mws0027	C9H10O5	Syringic acid	丁香酸	Phenolic acids	酚酸类	Phenolic acids	酚酸类	530-57-4	B	FALSE	FALSE	down	FALSE	FALSE	FALSE	6898.4	4162.1	1488.2	3029	1793.9	2238.4	5450.4	9	5717.7	9	9	4484.3	C10833	--
Lmhn002629	C11H10O7	Benzoyltartaric acid	苯甲酰酒石酸	Phenolic acids	酚酸类	Phenolic acids	酚酸类	-	B	FALSE	up	up	up	up	FALSE	9	9	9	9	9	9	1162200	921700	765490	403020	740570	695590	--	--
Lmhn003373	C11H10O7	p-Hydroxybenzoylmalic acid	对羟基苯甲酰苹果酸	Phenolic acids	酚酸类	Phenolic acids	酚酸类	-	B	FALSE	down	down	down	down	up	689170	396010	550790	502780	1311600	462440	12034	10695	14128	12438	56891	18604	--	--
Lmhn102068	C13H12O8	2-O-Caffeoylmalic acid	2-O-咖啡酰苹果酸	Phenolic acids	酚酸类	Phenolic acids	酚酸类	53755-04-7	B	FALSE	FALSE	up	FALSE	up	up	5472.3	4893.3	5433.4	9335.5	5116.8	1141.2	1596.6	4301.7	6593.8	20778	25131	34136	--	--
pmb3142	C13H16O8	Salicylic acid-2-O-glucoside	水杨酸-2-O-葡萄糖苷	Phenolic acids	酚酸类	Phenolic acids	酚酸类	10366-91-3	A	FALSE	FALSE	down	FALSE	FALSE	FALSE	10306000	7892700	7857700	5178700	10077000	5182600	5588300	6820000	3527100	2515800	5386800	2645600	--	--
Zmhn000892	C13H18O8	4-O-Glucosyl-3,4-dihydroxybenzyl alcohol	4-O-葡萄糖基-3,4-二羟基苄醇	Phenolic acids	酚酸类	Phenolic acids	酚酸类	-	A	FALSE	FALSE	up	FALSE	up	FALSE	109530	169390	103920	157160	78599	95076	145160	196580	184480	253740	297530	330490	--	--
Lmhn001477	C13H12O9	2-Caffeoyl-L-tartaric acid (Caftaric acid)	咖啡酰酒石酸	Phenolic acids	酚酸类	Phenolic acids	酚酸类	67879-58-7	A	FALSE	up	up	up	up	up	9	9	9	9	9	9	79789	58994	72481	471620	764040	601070	--	--
Lmmn002179	C14H18O8	Methyl salicylate-2-O-glucoside	水杨酸甲酯-2-O-葡萄糖苷	Phenolic acids	酚酸类	Phenolic acids	酚酸类	10019-60-0	B	FALSE	up	FALSE	FALSE	FALSE	FALSE	39987	52622	48385	54321	50956	38210	88260	94726	99523	80562	47082	109100	--	--
pmb2871	C13H16O9	1-O-Gentisoyl-D-glucoside*	1-O-龙胆酰-D-葡萄糖*	Phenolic acids	酚酸类	Phenolic acids	酚酸类	23445-11-6	A	FALSE	FALSE	FALSE	FALSE	up	up	482740	457090	497390	304990	321020	218610	378620	345240	322000	598490	1270900	476360	--	--
pmn001367	C13H16O9	Protocatechuic acid-4-O-glucoside*	原儿茶酸-4-O-葡萄糖苷*	Phenolic acids	酚酸类	Phenolic acids	酚酸类	-	A	FALSE	FALSE	up	FALSE	up	up	254350	250300	271790	196140	231500	157690	285260	234970	180540	442640	889000	292740	--	--
Lmhn002140	C14H14O9	Feruloyltartaric acid (Fertaric acid)	阿魏酰酒石酸	Phenolic acids	酚酸类	Phenolic acids	酚酸类	-	B	FALSE	up	up	up	up	FALSE	9	9	9	9	9	9	4660700	2764100	2634400	1888300	2544600	1774700	--	--
pmn001690	C16H24O7	3-Hydroxy-4-isopropylbenzylalcohol-3-O-glucoside	3-羟基-4-异丙基苯甲醇-3-O-葡萄糖苷	Phenolic acids	酚酸类	Phenolic acids	酚酸类	-	B	FALSE	down	down	down	down	down	308340	210730	271680	155370	244830	199310	107450	45501	43767	26697	23466	29140	--	--
Lmmn003663	C14H18O9	5-Glucosyloxy-2-Hydroxybenzoic acid methyl ester	5-葡萄糖氧基-2-羟基苯甲酸甲酯	Phenolic acids	酚酸类	Phenolic acids	酚酸类	-	B	FALSE	down	down	down	down	FALSE	82981	54811	52246	61872	77926	53027	4361.6	5940.2	8119.6	14838	11824	4918.6	--	--
Zmhn001883	C14H18O9	Vanillic acid-4-O-glucoside	香草酸-4-O-葡萄糖苷	Phenolic acids	酚酸类	Phenolic acids	酚酸类	32142-31-7	B	FALSE	down	down	down	down	FALSE	54340	82784	65934	37299	29741	39965	3232.4	7400.1	3886.2	2519.2	12072	2064.8	--	--
pmn001517	C15H22O8	3,4,5-Trimethoxyphenyl-1-O-Glucoside	3,4,5-三甲氧基苯基-1-O-葡萄糖苷	Phenolic acids	酚酸类	Phenolic acids	酚酸类	-	B	FALSE	up	up	up	up	FALSE	3469100	2379800	2494600	2181400	4697800	1844800	8710700	9064200	6291100	7722900	4369600	7339000	--	--
Zmhn002422	C16H20O9	1-O-Feruloyl-D-Glucose	1-O-阿魏酰-D-葡萄糖	Phenolic acids	酚酸类	Phenolic acids	酚酸类	-	A	FALSE	down	down	FALSE	FALSE	FALSE	27040000	25892000	23749000	14396000	18602000	16609000	13710000	9832300	7769900	13345000	6199900	13006000	C17759	--
pmb3107	C15H20O10	Glucosyringic Acid	葡萄糖基丁香酸	Phenolic acids	酚酸类	Phenolic acids	酚酸类	-	B	FALSE	up	FALSE	up	FALSE	FALSE	25958	49528	35413	40717	29322	45952	44077	96691	137440	48423	43856	90499	--	--
pmn001695	C16H20O10	Trihydroxycinnamoylquinic acid	三羟基肉桂酰奎宁酸	Phenolic acids	酚酸类	Phenolic acids	酚酸类	-	B	FALSE	up	up	up	FALSE	FALSE	44838	42162	33975	85342	79753	71778	224190	206940	172860	171110	108660	169080	--	--
Zmhn002227	C17H22O10	4-O-Glucosyl-sinapate	4-O-葡萄糖基芥子酸	Phenolic acids	酚酸类	Phenolic acids	酚酸类	-	B	FALSE	up	up	FALSE	FALSE	FALSE	5372.6	11401	3562.7	6749.5	11991	18272	25065	16832	18826	18931	10522	20092	C02919	--
Lmtn002324	C19H28O11	Benzyl-(2''-O-glucosyl)glucoside	苄基-(2''-O-葡萄糖基)葡萄糖苷	Phenolic acids	酚酸类	Phenolic acids	酚酸类	-	B	FALSE	FALSE	FALSE	up	FALSE	FALSE	18717	20124	21729	18663	6274.2	17638	37096	23464	27686	23131	21940	15929	C17564	--
pmb2654	C19H27NO12	Anthranilate-1-O-Sophoroside	邻氨基苯甲酸-1-O-槐糖苷	Phenolic acids	酚酸类	Phenolic acids	酚酸类	-	B	FALSE	up	up	up	up	FALSE	50562	101730	79732	189340	43215	63127	312490	156680	174700	152810	195730	481090	--	--
pmb3072	C22H26O12	3-O-p-Coumaroylshikimic acid-O-glucoside	3-O-对香豆酰莽草酸-O-葡萄糖苷	Phenolic acids	酚酸类	Phenolic acids	酚酸类	-	B	FALSE	down	down	down	FALSE	FALSE	31397	52493	40082	34816	19969	21809	11993	6566	16258	16307	18117	18575	--	--
pmn001707	C30H46O5	Quillaic acid	皂皮酸	Phenolic acids	酚酸类	Phenolic acids	酚酸类	631-01-6	B	FALSE	FALSE	FALSE	FALSE	down	down	826390	548570	1282000	1157500	1313400	2235100	1129600	832320	1307800	709650	606650	278150	C08972	--
Hmbn002692	C22H30O14	6'-O-Feruloyl-D-sucrose	6'-O-阿魏酰-D-蔗糖	Phenolic acids	酚酸类	Phenolic acids	酚酸类	118230-77-6	B	FALSE	FALSE	down	FALSE	down	FALSE	690060	514070	568010	1051500	592530	527920	625970	367580	159060	280350	204800	363650	--	--
ML10180524	C9H13N3O5	Cytarabine	胞嘧啶阿拉伯糖苷	Nucleotides and derivatives	核苷酸及其衍生物	Nucleotides and derivatives	核苷酸及其衍生物	147-94-4	B	FALSE	FALSE	down	down	down	FALSE	724260	212250	551610	235430	906380	755690	291920	206760	140880	151450	247660	144390	C02961	--
mws1060	C10H12N4O5	9-(Arabinosyl)hypoxanthine	9-(阿拉伯糖基)次黄嘌呤	Nucleotides and derivatives	核苷酸及其衍生物	Nucleotides and derivatives	核苷酸及其衍生物	7013-16-3	A	FALSE	FALSE	up	FALSE	up	up	118530	92488	93084	110620	85872	96207	96379	80953	94065	270140	282670	103280	--	--
Hmhp001812	C11H15N5O4	2'-O-Methyladenosine	2-甲氧基腺苷	Nucleotides and derivatives	核苷酸及其衍生物	Nucleotides and derivatives	核苷酸及其衍生物	2140-79-6	A	FALSE	FALSE	down	FALSE	FALSE	FALSE	386510	58434	124840	42749	80923	137220	78967	36116	34768	39254	52603	40637	--	--
pmb0197	C11H15N5O5	N7-Methylguanosine	N7-甲基鸟苷	Nucleotides and derivatives	核苷酸及其衍生物	Nucleotides and derivatives	核苷酸及其衍生物	20244-86-4	B	FALSE	FALSE	FALSE	down	FALSE	FALSE	47529	45523	50382	95253	74427	64559	43414	39434	31404	63829	54413	54822	C20674	--
mws0129	C16H12O5	Genkwanin (Apigenin 7-methyl ether)	芫花素 (5,4'-二羟基-7-甲氧基黄酮)	Flavonoids	黄酮	Flavonoid	黄酮	437-64-9	B	FALSE	down	FALSE	FALSE	FALSE	FALSE	269920	1071500	905940	784960	110850	902080	216200	201860	120530	145820	545080	260950	C10046	--
Lmbp003668	C20H18O10	Kaempferol-3-O-arabinoside	山奈酚-3-O-阿拉伯糖苷	Flavonoids	黄酮	Flavonoid	黄酮	-	B	FALSE	down	down	down	down	FALSE	2570200	1208600	1439700	1480300	2128100	1318200	692780	94605	37916	34838	231450	23901	--	--
pme0321	C21H20O10	Kaempferol-7-O-rhamnoside	山奈酚-7-O-鼠李糖苷	Flavonoids	黄酮	Flavonols	黄酮醇	20196-89-8	B	FALSE	down	down	down	down	FALSE	22741	17810	16309	33407	32975	26933	8519.7	3028.2	3740.8	2351.2	12535	2499.6	--	--
HJN087	C21H22O10	Naringenin-4'-O-glucoside	柚皮素-4'-O-葡萄糖苷	Flavonoids	黄酮	Flavonoid	黄酮	-	B	FALSE	FALSE	down	FALSE	FALSE	down	100740	66039	73940	29319	79112	43822	49109	76497	54544	26592	38437	22401	--	--
HJN055	C21H24O10	Dihydrocharcone-4'-O-glucoside	二氢查尔酮-4'-O-葡萄糖苷	Flavonoids	黄酮	Chalcones	查耳酮	-	A	FALSE	FALSE	FALSE	FALSE	FALSE	down	409070	549750	435850	617940	521230	640300	835680	752530	726970	326840	359760	394930	--	--
Lmlp003531	C21H20O11	Luteolin-3'-O-glucoside	木犀草素-3'-O-葡萄糖苷	Flavonoids	黄酮	Flavonoid	黄酮	5154-41-6	A	FALSE	down	down	down	down	FALSE	7573800	5130000	5543200	7955800	11524000	12408000	956150	424090	429110	744970	1873300	613250	--	--
HJAP135	C24H24O12	Pinocembrin-7-O-(6''-O-malonyl)glucoside	乔松素-7-O-(6''-O-丙二酰)葡萄糖苷	Flavonoids	黄酮	Flavonoid	黄酮	-	A	FALSE	down	down	down	down	FALSE	2765800	3019500	2938100	3318300	2226000	2306100	1848000	582400	426060	478060	2302900	634510	--	--
Zmxp005470	C26H26O15	Tricin-7-O-(6''-O-malonyl)glucoside	苜蓿素-7-O-(6''-O-丙二酰)葡萄糖苷	Flavonoids	黄酮	Flavonoid	黄酮	-	B	FALSE	up	up	up	up	down	9	9	9	9	9	9	30219	18939	40047	7089.2	4198.4	20910	--	--
Hmjn004446	C30H26O13	Luteolin-7-O-(6''-caffeoyl)rhamnoside	木犀草素-7-O-(6''-咖啡酰)鼠李糖苷	Flavonoids	黄酮	Flavonoid	黄酮	-	B	FALSE	down	down	down	down	FALSE	500750	480690	465450	596500	622230	914860	72288	39838	31910	43052	150390	73694	--	--
pmp001080	C28H32O15	Diosmetin-7-O-Neohesperidoside (Neodiosmin)	香叶木素-7-O-新橘皮糖苷	Flavonoids	黄酮	Flavonoid	黄酮	38665-01-9	B	FALSE	down	down	down	down	FALSE	195470	158750	149520	123100	204460	153660	65406	64371	64426	35565	69047	30785	--	--
pmp001105	C33H40O20	Kaempferol-3-O-neohesperidoside-7-O-glucoside	山奈酚-3-O-新橙皮糖苷-7-O-葡萄糖苷	Flavonoids	黄酮	Flavonols	黄酮醇	-	A	FALSE	FALSE	down	FALSE	down	down	53668	70319	84472	63572	140880	128080	110690	90687	155400	23542	13789	51384	--	--
Lmyp003588	C35H28O20	Quercetin-3-O-(2'',6''-digalloyl)-glucoside	槲皮素-3-O-(2'',6''-二没食子酰)葡萄糖苷	Flavonoids	黄酮	Flavonols	黄酮醇	-	B	FALSE	up	up	up	up	FALSE	26721	28190	36707	21734	10690	14611	654300	679840	604060	580320	589070	518250	--	--
mws1013	C9H6O4	Esculetin	秦皮乙素	Lignans and Coumarins	木脂素和香豆素	Coumarins	香豆素	305-01-1	A	FALSE	FALSE	FALSE	FALSE	FALSE	up	29866	72802	79531	220520	83165	67967	48774	8958.7	9	64354	74896	50241	C09263	--
Hmjp002337	C10H8O4	Isoscopoletin (6-Hydroxy-7-Methoxycoumarin)	异莨菪亭	Lignans and Coumarins	木脂素和香豆素	Coumarins	香豆素	776-86-3	B	FALSE	down	FALSE	FALSE	FALSE	FALSE	342300	303410	340680	102550	177330	296560	135720	119720	52650	183050	126020	192400	C18079	--
mws4173	C11H10O4	5,7-Dimethoxycoumarin (Limettin)(Citropten)	5,7-二甲氧基香豆素 (柠檬内酯)(柠檬油素)	Lignans and Coumarins	木脂素和香豆素	Coumarins	香豆素	487-06-9	B	FALSE	up	up	up	up	FALSE	9	9	9	9	9	9	251740	316390	178720	336350	14184	195490	--	--
mws1014	C10H8O5	Fraxetin (7,8-Dihydroxy-6-methoxycoumarin)	秦皮素	Lignans and Coumarins	木脂素和香豆素	Coumarins	香豆素	574-84-5	B	FALSE	up	up	FALSE	up	FALSE	179290	140300	134740	72732	212640	294390	578930	552520	178870	499770	491670	564640	C09265	--
Rfmb25702	C28H34O12	Pinoresinol-4-O-(6''-acetyl)glucoside	松脂醇-4-O-(6''-乙酰)葡萄糖苷	Lignans and Coumarins	木脂素和香豆素	Lignans	木脂素	-	B	FALSE	down	down	down	down	up	119570	147060	106580	69866	77697	134320	15096	3268.3	5226.5	12264	47544	7926	--	--
Rfmb26201	C30H38O14	Syringaresinol-4'-O-(6''-acetyl)glucoside	丁香树脂酚-4'-O-(6''-乙酰)葡萄糖苷	Lignans and Coumarins	木脂素和香豆素	Lignans	木脂素	-	B	FALSE	FALSE	down	FALSE	down	down	46774	84940	46635	75200	35905	75406	59696	18099	21422	6616.5	17996	11102	--	--
pmn001368	C32H44O17	Olivil-4,4'-Di-O-glucoside	橄榄树脂素-4,4'-二-O-葡萄糖苷	Lignans and Coumarins	木脂素和香豆素	Lignans	木脂素	-	B	FALSE	FALSE	FALSE	FALSE	down	FALSE	86754	94742	69574	126340	184070	181520	92508	105090	92099	56744	45499	57967	--	--
Hmyp002656	C11H11NO4	Methyl dioxindole-3-acetate	甲基-二氧吲哚-乙酸	Others	其它类	Others	其它	57061-18-4	A	FALSE	up	FALSE	up	FALSE	FALSE	9228.2	5297.1	4618.2	9573.9	4675.9	6557.3	21841	16561	9387.4	14157	9056.4	7915.1	--	--
pme3163	C7H15O10P	D-Sedoheptuiose 7-phosphate	D-景天庚酮糖 7-磷酸	Others	其它类	Saccharides and Alcohols	糖及醇类	2646-35-7	B	FALSE	FALSE	FALSE	FALSE	down	FALSE	770540	1335600	778090	1391300	877810	1468400	1088900	493210	404400	594410	671060	512010	--	--
pmb0789	C14H21NO8	Pyridoxine-5'-O-glucoside	吡哆醇-5'-O-葡萄糖苷	Others	其它类	Vitamin	维生素	-	B	FALSE	down	FALSE	down	down	FALSE	382650	313400	423620	486820	485050	522610	177660	175400	168530	192060	250120	229680	C03996	--
Lmsn000381	C12H22O11	D-Maltose*	D-麦芽糖*	Others	其它类	Saccharides and Alcohols	糖及醇类	133-99-3	A	FALSE	up	up	FALSE	FALSE	FALSE	223400	507550	244020	1143500	175250	274260	1538900	1003100	845450	815030	768470	1427200	C01971	--
mws5038	C12H22O11	Isomaltulose*	异麦芽酮糖*	Others	其它类	Saccharides and Alcohols	糖及醇类	13718-94-0	A	FALSE	up	up	up	FALSE	FALSE	255490	743660	425080	1105300	159120	419330	1486000	1135300	1025800	910580	758570	1447600	C01742	--
pmb0801	C14H19NO9	4-Pyridoxic acid-O-glucoside	4-吡哆酸-O-葡萄糖苷	Others	其它类	Vitamin	维生素	-	A	FALSE	up	up	FALSE	FALSE	FALSE	26244	25465	39220	43208	35788	65559	69396	64937	77846	56537	51851	103740	--	--
mws5040	C12H21O11Na	Turanose	松二糖	Others	其它类	Saccharides and Alcohols	糖及醇类	547-25-1	B	FALSE	up	FALSE	up	FALSE	FALSE	131310	330720	195980	436670	131850	245460	603550	609790	547740	327580	259620	985720	C19636	--
pmn001513	C14H10O9	Digallic Acid	双没食子酸	Tannins	鞣质	Tannin	鞣质	536-08-3	B	FALSE	FALSE	FALSE	FALSE	FALSE	up	8876.1	8355.8	6845	4020.1	5958.2	15333	3664.8	4500.5	5478	13681	8845.1	8127.7	C01572	--
mws0146	C7H7NO2	Nicotinic Acid Methyl Ester(Methyl Nicotinate)	烟酸甲酯	Alkaloids	生物碱	Alkaloids	生物碱	93-60-7	B	FALSE	up	up	FALSE	FALSE	FALSE	28030	50608	30533	103530	30266	42557	88681	88258	50946	158260	64699	126960	--	--
Hmtp000776	C8H9NO3	4,5,6-Trihydroxy-2-cyclohexen-1-ylideneacetonitrile	4,5,6-三羟基-2-环己烯-1-亚乙乙腈	Alkaloids	生物碱	Alkaloids	生物碱	-	B	FALSE	up	FALSE	FALSE	FALSE	FALSE	195140	196600	239480	328320	312740	232740	640430	434830	239430	624710	352630	247380	--	--
pmp001252	C17H17NO3	p-Coumaroyltyramine	对香豆酰酪胺	Alkaloids	生物碱	Phenolamine	酚胺	36417-86-4	B	FALSE	down	down	down	FALSE	FALSE	3193.3	18476	8119.4	9	3192.6	4625.6	9	9	9	9	9	8859.8	--	--
mws0983	C20H39NO2	N-Oleoylethanolamine	油酰单乙醇胺	Alkaloids	生物碱	Alkaloids	生物碱	111-58-0	B	FALSE	down	down	FALSE	down	FALSE	273900	67372	97473	34456	81635	84716	38008	35943	42353	28481	33859	26513	C20792	--
pmb2211	C19H38N2O3	Cocamidopropyl betaine	椰油酰胺丙基甜菜碱	Alkaloids	生物碱	Alkaloids	生物碱	4292-10-8	A	FALSE	FALSE	FALSE	FALSE	up	FALSE	21381	36508	17619	16168	12673	27882	23104	23151	47341	36981	37110	58968	--	--
pmb0492	C34H37N3O6	N',N'',N'''-p-Coumaroyl-cinnamoyl-caffeoyl spermidine	N',N'',N'''-对香豆酰肉桂酰咖啡酰亚精胺	Alkaloids	生物碱	Phenolamine	酚胺	-	B	FALSE	FALSE	down	FALSE	down	FALSE	364580	102530	178570	88056	250620	238820	178750	119780	61219	79690	98413	52834	--	--
Lmsn012425	C30H48O4	Rubusic acid (3β,7α-Dihydroxyolean-12-en-28-oic acid)	3β,7α-二羟基齐墩果-12-烯-28-酸	Terpenoids	萜类	Triterpene	三萜	23984-26-1	A	FALSE	down	down	down	down	down	37399	7100.7	15334	5002.5	25951	21727	6065.3	3017.9	6308.9	1991.1	679.05	1190.7	--	--
Lmmn004145	C38H60O10	3-O-(2-O-Acetyl-glucosyl)oleanolic acid	3-O-(2-O-乙酰基-葡萄糖基)齐墩果酸	Terpenoids	萜类	Triterpene	三萜	-	A	FALSE	FALSE	down	down	down	FALSE	9064000	4368700	10024000	8279200	14132000	13660000	5443800	5071100	5486300	4118700	3912000	1448400	--	--
Lmsn006130	C36H56O12	2α,3β,19α-Trihydroxyurs-12-en-23,28-dioic acid-28-O-glucoside	2α,3β,19α-三羟基熊果-12-烯-23,28-二酸-28-O-葡萄糖苷	Terpenoids	萜类	Triterpene	三萜	-	A	FALSE	up	FALSE	up	up	FALSE	10729	8946.6	14029	10315	9366.7	10224	19495	29105	29544	22125	18484	19592	--	--
pmn001505	C41H64O13	Oleanolic acid-3-O-xylosyl(1→3)glucuronide	齐墩果酸-3-O-木糖基(1→3)葡萄糖醛酸苷	Terpenoids	萜类	Triterpene	三萜	-	A	FALSE	FALSE	down	down	down	FALSE	137030	34713	97060	56503	149810	121710	44219	33019	40158	35077	24608	8953.1	--	--
pme0275	C5H8O3	4-Oxopentanoic Acid	4-氧代戊酸	Organic acids	有机酸	Organic acids	有机酸	123-76-2	B	FALSE	FALSE	FALSE	down	FALSE	FALSE	15288	11050	11861	12744	16422	13079	4741.2	6876.6	7913	10206	10116	5680.1	--	--
pme3034	C5H8O4	Ethylmalonic acid	乙基丙二酸	Organic acids	有机酸	Organic acids	有机酸	601-75-2	B	FALSE	down	down	FALSE	FALSE	FALSE	32451	22933	30183	14687	31307	12320	9777.9	15079	9252.6	9496	13787	12086	--	--
Lmmn000806	C5H8O4	Dimethylmalonic acid*	二甲基丙二酸*	Organic acids	有机酸	Organic acids	有机酸	595-46-0	A	FALSE	down	down	FALSE	FALSE	FALSE	247070	153190	303940	78772	191830	115240	95192	141900	49203	69350	110410	16411	--	--
mws0473	C5H8O4	2-Methylsuccinic acid*	2-甲基丁二酸*	Organic acids	有机酸	Organic acids	有机酸	498-21-5	A	FALSE	down	down	FALSE	FALSE	FALSE	2716800	1822800	3148700	952970	2243900	1365600	1051200	1691400	564740	806890	1251000	225130	--	--
mws0341	C6H12O3	2-Hydroxyisocaproic acid	2-羟基异己酸	Organic acids	有机酸	Organic acids	有机酸	20312-37-2	A	FALSE	down	FALSE	FALSE	FALSE	FALSE	90397	29337	55432	9374.7	22492	56338	23207	18524	16644	16932	62307	12784	C03264	--
mws0972	C6H12O3	6-Hydroxyhexanoic acid	6-羟基己酸	Organic acids	有机酸	Organic acids	有机酸	1191-25-9	A	FALSE	up	FALSE	FALSE	FALSE	FALSE	258380	258080	309670	387080	354670	678690	581400	863240	684130	439130	602040	297130	C06103	--
mws0924	C6H10O4	2-Methylglutaric acid*	2-甲基戊二酸*	Organic acids	有机酸	Organic acids	有机酸	617-62-9	B	FALSE	down	FALSE	down	down	FALSE	875860	589220	502670	985410	1429400	701710	281600	379960	260200	353640	444390	220110	--	--
Lmbn002072	C7H12O4	2-Propylsuccinic acid*	2-丙基琥珀酸*	Organic acids	有机酸	Organic acids	有机酸	618-57-5	B	FALSE	FALSE	up	FALSE	FALSE	FALSE	27505	22734	22386	29773	38582	16813	114900	25966	35829	65073	32484	106470	C16657	--
pme3186	C3H7O6P	DL-Glyceraldehyde-3-phosphate	DL-甘油醛-3-磷酸	Organic acids	有机酸	Organic acids	有机酸	591-59-3	B	FALSE	FALSE	FALSE	up	FALSE	FALSE	77040	18597	65895	17899	41277	25667	43789	94602	67801	49927	37988	80904	C00661	--
mws0242	C8H14O4	Suberic Acid	辛二酸	Organic acids	有机酸	Organic acids	有机酸	505-48-6	B	FALSE	down	down	down	down	FALSE	157060	89181	84685	151460	162920	75910	43590	49129	36312	44867	34302	31638	C08278	--
Lmmn003323	C16H32O3	2-Hydroxyhexadecanoic acid	2-羟基十六烷酸	Organic acids	有机酸	Organic acids	有机酸	764-67-0	B	FALSE	down	down	down	down	FALSE	597640	182340	276630	159900	414110	316050	140580	154330	141260	105840	115730	136230	--	--
mws5045	C12H24O3	12-Hydroxydodecanoic acid	12-羟基十二酸	Lipids	脂质	Free fatty acids	游离脂肪酸	505-95-3	A	FALSE	up	up	up	up	up	1687.8	1043	1146	2488.7	1311.2	1777.5	5147.3	6544.7	6778	36291	18529	44739	C08317	--
Hmbp003234	C12H14O6	1-O-Caffeoylglycerol	1-O-咖啡酰单甘油	Lipids	脂质	Glycerol ester	甘油酯	-	B	FALSE	FALSE	FALSE	up	FALSE	FALSE	49460	60834	60463	44518	26299	52185	131790	64276	53973	54956	42139	67931	--	--
Hmqn003054	C18H34O5	9,10,11-Trihydroxy-12-octadecenoic acid	9,10,11-三羟基-12-十八碳烯酸	Lipids	脂质	Free fatty acids	游离脂肪酸	61911-67-9	A	FALSE	FALSE	up	FALSE	up	FALSE	20419	24757	25660	22688	19581	26866	22831	34361	35242	52006	40538	50171	--	--
Lmhp011562	C21H36O4	1-α-Linolenoyl-glycerol	1-α-亚麻酸甘油酯	Lipids	脂质	Glycerol ester	甘油酯	-	A	FALSE	down	down	down	down	FALSE	8559000	3461900	6817300	3437400	7829600	5664300	2416100	2298400	2420100	2286900	940710	1219100	--	--
Lmhp011388	C21H36O4	2-α-Linolenoyl-glycerol	2-α-亚麻酸甘油酯	Lipids	脂质	Glycerol ester	甘油酯	55268-58-1	A	FALSE	down	down	down	down	FALSE	4427800	1629000	3439900	1447000	3596300	2610300	705430	958390	852200	978920	392400	501210	--	--
Lmhp012042	C21H38O4	2-Linoleoylglycerol	2-亚油酰甘油酯	Lipids	脂质	Glycerol ester	甘油酯	3443-82-1	A	FALSE	down	down	down	down	FALSE	770930	408700	584680	504830	864500	544690	301470	294710	209640	204840	129370	121300	--	--
Lmhp112042	C21H38O4	1-Linoleoylglycerol	1-亚油酰甘油酯	Lipids	脂质	Glycerol ester	甘油酯	2277-28-3	A	FALSE	down	down	down	down	FALSE	854620	424300	579230	519880	867700	555620	304130	285780	224120	212270	134650	135910	--	--
pmb0296	C21H40O4	1-Oleoyl-Sn-Glycerol	单酰甘油酯(18:1)	Lipids	脂质	Glycerol ester	甘油酯	129784-87-8	A	FALSE	FALSE	down	FALSE	down	down	504820	224030	452970	383860	499580	759230	353840	297520	334700	188030	164630	95801	--	--
pmd0152	C19H39O7P	LysoPA 16:0 (2n isomer)	溶血卵磷脂酸 16:0(2n异构)	Lipids	脂质	Glycerol ester	甘油酯	-	B	FALSE	FALSE	down	FALSE	FALSE	down	12927	9	8102.9	9	34372	9	9	5328.6	8498.1	9	9	9	--	--
Lmhp008337	C19H40NO7P	LysoPE 14:0(2n isomer)	溶血磷脂酰乙醇胺 14:0(2n异构)	Lipids	脂质	LPE	溶血磷脂酰乙醇胺	-	B	FALSE	down	down	down	down	down	32267	13159	21920	13347	44099	19165	13991	7032.8	11636	9543.7	2923.6	3144.1	--	--
pmb0864	C19H40NO7P	LysoPE 14:0	溶血磷脂酰乙醇胺 14:0	Lipids	脂质	LPE	溶血磷脂酰乙醇胺	-	B	FALSE	down	down	down	down	FALSE	153900	49416	89175	56088	233240	96071	52061	32793	38607	40734	13343	10102	--	--
Lmhp008440	C20H40NO7P	LysoPE 15:1	溶血磷脂酰乙醇胺 15:1	Lipids	脂质	LPE	溶血磷脂酰乙醇胺	-	A	FALSE	down	down	down	down	FALSE	7375.1	3975.4	5244.7	2219.3	9963.5	5030.8	9	9	9	1910.6	9	9	--	--
Lmhp008273	C20H40NO7P	LysoPE 15:1(2n isomer)	溶血磷脂酰乙醇胺 15:1(2n异构)	Lipids	脂质	LPE	溶血磷脂酰乙醇胺	-	B	FALSE	down	down	down	down	down	2526.3	721.77	2042.6	706.12	2973.4	927.71	365.38	429.11	586.32	9	9	9	--	--
Lmhp009187	C20H42NO7P	LysoPE 15:0	溶血磷脂酰乙醇胺 15:0	Lipids	脂质	LPE	溶血磷脂酰乙醇胺	-	A	FALSE	down	down	down	down	FALSE	85275	28327	46863	41224	113640	70903	30841	19192	22352	19567	11683	8179.7	--	--
Lmhp008885	C20H42NO7P	LysoPE 15:0(2n isomer)	溶血磷脂酰乙醇胺 15:0(2n异构)	Lipids	脂质	LPE	溶血磷脂酰乙醇胺	-	A	FALSE	FALSE	down	down	down	down	17351	7332.1	11009	7691	20299	14066	6943.2	4935.5	7531.4	5008	2172	1664.7	--	--
Lmhp007836	C21H38NO7P	LysoPE 16:3	溶血磷脂酰乙醇胺 16:3	Lipids	脂质	LPE	溶血磷脂酰乙醇胺	-	A	FALSE	down	down	FALSE	down	FALSE	61512	39912	58377	26683	56733	42348	30246	18767	21024	33180	14830	7627.5	--	--
Lmhp008763	C21H42NO7P	LysoPE 16:1(2n isomer)	溶血磷脂酰乙醇胺 16:1(2n异构)	Lipids	脂质	LPE	溶血磷脂酰乙醇胺	-	A	FALSE	down	FALSE	down	FALSE	FALSE	108420	44549	77698	34661	65767	48455	26028	17459	16262	39547	50227	10785	--	--
Lmhp009034	C21H42NO7P	LysoPE 16:1	溶血磷脂酰乙醇胺 16:1	Lipids	脂质	LPE	溶血磷脂酰乙醇胺	-	A	FALSE	down	down	down	down	FALSE	212310	92850	148120	108180	331840	147740	90248	44510	62989	91117	73391	24138	--	--
pmd0160	C21H44NO7P	LysoPE 16:0(2n isomer)	溶血磷脂酰乙醇胺 16:0(2n异构)	Lipids	脂质	LPE	溶血磷脂酰乙醇胺	-	A	FALSE	FALSE	down	down	down	FALSE	3505600	1047700	1790400	1236400	4181300	2122200	1183100	716340	1014800	924940	288270	297060	--	--
pmb0876	C21H44NO7P	LysoPE 16:0	溶血磷脂酰乙醇胺 16:0	Lipids	脂质	LPE	溶血磷脂酰乙醇胺	53862-35-4	A	FALSE	down	down	down	down	FALSE	16050000	4390200	7858300	5161700	19769000	10975000	4087900	2966800	4007200	3833400	1268900	1263400	--	--
Lmhp009464	C22H44NO7P	LysoPE 17:1(2n isomer)	溶血磷脂酰乙醇胺 17:1(2n异构)	Lipids	脂质	LPE	溶血磷脂酰乙醇胺	-	A	FALSE	down	down	down	down	FALSE	43941	15266	23619	17111	61212	35163	12037	7139.4	13432	11667	5341.7	4331.8	--	--
Lmhp009769	C22H44NO7P	LysoPE 17:1	溶血磷脂酰乙醇胺 17:1	Lipids	脂质	LPE	溶血磷脂酰乙醇胺	-	A	FALSE	down	down	down	down	FALSE	47945	14824	26116	18614	63149	32045	13564	9323.7	9538.3	13811	5006.4	4678.9	--	--
pmd0130	C22H46NO7P	LysoPC 14:0	溶血磷脂酰胆碱 14:0	Lipids	脂质	LPC	溶血磷脂酰胆碱	20559-16-4	A	FALSE	down	down	FALSE	down	FALSE	61124	35672	62456	35273	65416	38841	26570	22111	23150	29488	16562	8081.2	--	--
Lmhp008233	C23H40NO7P	LysoPE 18:4	溶血磷脂酰乙醇胺 18:4	Lipids	脂质	LPE	溶血磷脂酰乙醇胺	-	A	FALSE	down	down	down	down	FALSE	4835.5	3196.9	5840.6	3035.4	7087.9	4909.7	2165	1968.9	1065.3	2976.4	1240.7	966.08	--	--
Lmhp008589	C23H42NO7P	LysoPE 18:3(2n isomer)	溶血磷脂酰乙醇胺 18:3(2n异构)	Lipids	脂质	LPE	溶血磷脂酰乙醇胺	-	A	FALSE	down	down	down	FALSE	FALSE	7425400	3322300	5570900	2121900	6996300	4204200	2149500	2227600	1583400	3428900	2714900	1005700	--	--
Lmhp008801	C23H42NO7P	LysoPE 18:3	溶血磷脂酰乙醇胺 18:3	Lipids	脂质	LPE	溶血磷脂酰乙醇胺	-	A	FALSE	FALSE	down	down	down	FALSE	4297000	2136300	3382400	1967200	6253700	2760600	1969600	1459600	1497700	2318500	1232300	683050	--	--
pmb0874	C23H44NO7P	LysoPE 18:2(2n isomer)	溶血磷脂酰乙醇胺 18:2(2n异构)	Lipids	脂质	LPE	溶血磷脂酰乙醇胺	-	A	FALSE	down	down	down	down	FALSE	30136000	13909000	23153000	11036000	31849000	20624000	9423600	8147300	6237100	12314000	9429700	3150100	--	--
pmb0881	C23H44NO7P	LysoPE 18:2	溶血磷脂酰乙醇胺 18:2	Lipids	脂质	LPE	溶血磷脂酰乙醇胺	-	A	FALSE	down	down	down	down	FALSE	14127000	6364300	10698000	6543400	17049000	8785200	5363600	3760400	3928800	5814700	3138800	1545200	--	--
pmb2260	C23H46NO7P	LysoPC 15:1	溶血磷脂酰胆碱 15:1	Lipids	脂质	LPC	溶血磷脂酰胆碱	-	A	FALSE	down	down	down	down	FALSE	16793	10701	17762	7239.5	26033	10985	3394.7	4895.8	5289.1	4422.7	3193.8	2149.6	--	--
mws0289	C23H46NO7P	LysoPE 18:1	溶血磷脂酰乙醇胺 18:1	Lipids	脂质	LPE	溶血磷脂酰乙醇胺	89576-29-4	A	FALSE	FALSE	down	FALSE	down	FALSE	3305500	1050700	2073400	1217600	2661400	2137500	1285400	951080	1368600	1343700	645730	644750	--	--
pmb0856	C23H46NO7P	LysoPE 18:1(2n isomer)	溶血磷脂酰乙醇胺 18:1(2n异构)	Lipids	脂质	LPE	溶血磷脂酰乙醇胺	-	A	FALSE	down	down	FALSE	FALSE	FALSE	4719700	1315800	2932800	1094700	2572200	2989000	1106000	1105600	1221700	1620600	1027200	776810	--	--
pmb0883	C23H48NO7P	LysoPE 18:0	溶血磷脂酰乙醇胺 18:0	Lipids	脂质	LPE	溶血磷脂酰乙醇胺	69747-55-3	A	FALSE	down	down	down	down	FALSE	143080	30120	61795	24472	89637	44725	19017	14395	21194	18207	8694.3	7038.2	--	--
pmb2319	C23H48NO7P	LysoPC 15:0	溶血磷脂酰胆碱 15:0	Lipids	脂质	LPC	溶血磷脂酰胆碱	108273-89-8	A	FALSE	FALSE	down	down	down	FALSE	119010	66030	100940	87974	179680	119830	68795	49410	58745	46934	43338	29143	--	--
pmb0880	C23H48NO7P	LysoPE 18:0(2n isomer)	溶血磷脂酰乙醇胺 18:0(2n异构)	Lipids	脂质	LPE	溶血磷脂酰乙醇胺	-	A	FALSE	FALSE	down	FALSE	down	FALSE	42076	13065	27875	15746	34022	28745	16283	13827	17208	16506	8009.1	7614.3	--	--
Lmhp009129	C23H48NO7P	LysoPC 15:0(2n isomer)	溶血磷脂酰胆碱 15:0(2n异构)	Lipids	脂质	LPC	溶血磷脂酰胆碱	-	A	FALSE	down	down	down	down	FALSE	40128	18087	33338	23640	35513	27864	18417	10627	11493	10104	14396	7796.6	--	--
Hmyn007168	C22H45O9P	LysoPG 16:0	溶血磷脂酰甘油 16:0	Lipids	脂质	Glycerol ester	甘油酯	-	B	FALSE	down	down	FALSE	FALSE	FALSE	9466900	3899600	5776300	2631800	6802300	6049800	2799600	3210600	2326100	3268800	3008700	1779500	--	--
pma1303	C24H46NO7P	LysoPC 16:2	溶血磷脂酰胆碱 16:2	Lipids	脂质	LPC	溶血磷脂酰胆碱	-	A	FALSE	FALSE	FALSE	FALSE	down	FALSE	98441	63986	97930	85740	207210	126780	84746	60417	68462	83328	36913	35554	--	--
pmb0863	C24H46NO7P	LysoPC 16:2(2n isomer)	溶血磷脂酰胆碱 16:2(2n异构)	Lipids	脂质	LPC	溶血磷脂酰胆碱	-	A	FALSE	down	down	FALSE	FALSE	FALSE	59912	39258	69082	30273	77254	32368	27864	26357	22100	35483	26309	11034	--	--
pmp001270	C24H48NO7P	LysoPC 16:1	溶血磷脂酰胆碱 16:1	Lipids	脂质	LPC	溶血磷脂酰胆碱	76790-27-7	A	FALSE	FALSE	FALSE	down	down	FALSE	423740	265420	419930	298370	707400	322100	274730	185530	195680	227860	252030	116410	--	--
Lmhp008833	C24H48NO7P	LysoPC 16:1(2n isomer)	溶血磷脂酰胆碱 16:1(2n异构)	Lipids	脂质	LPC	溶血磷脂酰胆碱	-	A	FALSE	down	down	down	FALSE	FALSE	592720	296810	570540	217770	543720	289760	167640	156660	120370	223980	295020	73285	--	--
pmb0855	C24H50NO7P	LysoPC 16:0	溶血磷脂酰胆碱 16:0	Lipids	脂质	LPC	溶血磷脂酰胆碱	17364-16-8	A	FALSE	FALSE	down	down	down	FALSE	28877000	14161000	23287000	16464000	42906000	23244000	12009000	11142000	13401000	10954000	7244000	6721400	--	--
pmd0132	C24H50NO7P	LysoPC 16:0(2n isomer)	溶血磷脂酰胆碱 16:0(2n异构)	Lipids	脂质	LPC	溶血磷脂酰胆碱	-	A	FALSE	FALSE	down	FALSE	down	FALSE	5636200	2519800	4412700	2832800	6696400	3789300	2248900	1956300	2481500	2004700	1185400	1080600	--	--
Lmhp010040	C25H46NO7P	LysoPE 20:3	溶血磷脂酰乙醇胺 20:3	Lipids	脂质	LPE	溶血磷脂酰乙醇胺	-	A	FALSE	down	down	down	down	FALSE	28262	10231	20161	10230	41778	16327	10110	6415.3	7044.1	9047.9	3430.3	2673.9	--	--
Lmhp009802	C25H46NO7P	LysoPE 20:3(2n isomer)	溶血磷脂酰乙醇胺 20:3(2n异构)	Lipids	脂质	LPE	溶血磷脂酰乙醇胺	-	A	FALSE	down	down	down	down	FALSE	30086	8535.2	20189	9820.9	45046	16330	10023	7244	8157.8	10295	4445.9	2541.3	--	--
Lmhp010514	C25H48NO7P	LysoPE 20:2(2n isomer)	溶血磷脂酰乙醇胺 20:2(2n异构)	Lipids	脂质	LPE	溶血磷脂酰乙醇胺	-	A	FALSE	down	down	down	down	FALSE	28310	10293	16349	7661.7	32325	11652	6686.2	5039.3	5517.5	10075	3555.5	2382.5	--	--
Lmhp008718	C25H48NO7P	LysoPC 17:2	溶血磷脂酰胆碱 17:2	Lipids	脂质	LPC	溶血磷脂酰胆碱	-	A	FALSE	down	down	down	down	FALSE	69809	27594	60204	32236	129640	46123	18258	15106	12297	22672	21267	6269.3	--	--
Lmhp010757	C25H48NO7P	LysoPE 20:2	溶血磷脂酰乙醇胺 20:2	Lipids	脂质	LPE	溶血磷脂酰乙醇胺	-	A	FALSE	down	down	down	down	FALSE	74464	18250	42091	19265	109890	36410	18471	10828	13181	20163	4987.4	5804.2	--	--
Lmhp009590	C25H50NO7P	LysoPC 17:1	溶血磷脂酰胆碱 17:1	Lipids	脂质	LPC	溶血磷脂酰胆碱	-	A	FALSE	FALSE	FALSE	down	down	FALSE	53081	18139	49191	36866	95585	50845	27309	24675	28807	26757	18980	12836	--	--
Lmhp010515	C25H52NO7P	LysoPC 17:0(2n isomer)	溶血磷脂酰胆碱 17:0(2n异构)	Lipids	脂质	LPC	溶血磷脂酰胆碱	-	A	FALSE	FALSE	down	FALSE	down	FALSE	42017	23264	35142	22348	38881	30843	20504	14252	16156	10896	17716	8369.7	--	--
pmb2406	C25H52NO7P	LysoPC 17:0	溶血磷脂酰胆碱 17:0	Lipids	脂质	LPC	溶血磷脂酰胆碱	50930-23-9	A	FALSE	FALSE	down	FALSE	down	FALSE	22643	21301	19214	14059	23413	19249	12618	12069	14737	6263.4	10984	3784.3	--	--
Lmhp009526	C27H46O9	2-α-Linolenoyl-glycerol-1-O-glucoside	2-α-亚麻酸甘油酯-1-O-葡萄糖苷	Lipids	脂质	Glycerol ester	甘油酯	-	A	FALSE	FALSE	FALSE	FALSE	down	FALSE	80810	71775	106340	94485	117980	178600	86933	96026	121070	63471	91147	33114	--	--
Lmhp009773	C27H46O9	1-α-Linolenoyl-glycerol-3-O-glucoside	1-α-亚麻酸甘油酯-3-O-葡萄糖苷	Lipids	脂质	Glycerol ester	甘油酯	-	A	FALSE	FALSE	FALSE	FALSE	down	FALSE	186970	100590	190430	170740	325770	197380	153020	137360	199750	157590	58032	57857	--	--
Hmqp006235	C26H46NO7P	LysoPC 18:4	溶血磷脂酰胆碱 18:4	Lipids	脂质	LPC	溶血磷脂酰胆碱	-	A	FALSE	down	down	FALSE	FALSE	FALSE	26945	13562	24537	9839.4	32709	11356	8564.7	10964	6322.4	9439.5	12634	4238.6	--	--
Lmhp010334	C27H48O9	2-Linoleoylglycerol-1-O-glucoside	2-亚油酰甘油酯-1-O-葡萄糖苷	Lipids	脂质	Glycerol ester	甘油酯	-	A	FALSE	FALSE	FALSE	FALSE	down	down	4686.8	1063.5	4239.7	2142.4	7624	6582.3	2769.2	4591.8	2642.2	1761.6	1955.3	1087.6	--	--
Lmhp010573	C27H48O9	1-Linoleoylglycerol-3-O-glucoside	1-亚油酰甘油酯-3-O-葡萄糖苷	Lipids	脂质	Glycerol ester	甘油酯	-	A	FALSE	FALSE	FALSE	FALSE	down	down	6466.7	2140.1	5065.6	4232.2	15247	7737	4046.3	4262	6658.2	3363.3	418.57	1526.2	--	--
pmp001251	C26H50NO7P	LysoPC 18:2(2n isomer)	溶血磷脂酰胆碱 18:2(2n异构)	Lipids	脂质	LPC	溶血磷脂酰胆碱	-	A	FALSE	down	down	down	down	FALSE	3154300	1505700	2935800	1395900	4967200	2105300	1091200	977610	820480	1354900	1158600	392980	--	--
pmp001273	C26H50NO7P	LysoPC 18:2	溶血磷脂酰胆碱 18:2	Lipids	脂质	LPC	溶血磷脂酰胆碱	-	A	FALSE	FALSE	down	down	down	FALSE	1409100	876300	1382200	1001200	2507300	1139900	803270	612490	685610	751490	542450	328270	--	--
Lmhp010190	C26H52NO7P	LysoPC 18:1(2n isomer)	溶血磷脂酰胆碱 18:1(2n异构)	Lipids	脂质	LPC	溶血磷脂酰胆碱	-	A	FALSE	down	FALSE	FALSE	FALSE	FALSE	45722000	16699000	39712000	16024000	44715000	28779000	14806000	16220000	16880000	24186000	15600000	8544200	--	--
mws0126	C26H54NO7P	LysoPC 18:0	溶血磷脂酰胆碱 18:0	Lipids	脂质	LPC	溶血磷脂酰胆碱	19420-57-6	A	FALSE	down	down	down	down	FALSE	830230	321110	586550	272160	780920	422500	241950	212180	246150	211780	159070	150460	--	--
Lmhp007840	C27H52NO7P	LysoPC 19:2	溶血磷脂酰胆碱 19:2	Lipids	脂质	LPC	溶血磷脂酰胆碱	-	A	FALSE	down	down	down	down	FALSE	44823	14032	29432	6838.4	33061	21970	6357.8	5475.2	5163.9	9621.4	5294	2733.3	--	--
Lmhp010908	C27H54NO7P	LysoPC 19:1	溶血磷脂酰胆碱 19:1	Lipids	脂质	LPC	溶血磷脂酰胆碱	-	A	FALSE	down	FALSE	FALSE	FALSE	FALSE	36585	7942	22575	8736.6	41794	16351	7380.1	9475.5	8397.6	11129	8141.8	6167.7	--	--
pmd0146	C28H54NO7P	LysoPC 20:2(2n isomer)	溶血磷脂酰胆碱 20:2(2n异构)	Lipids	脂质	LPC	溶血磷脂酰胆碱	-	A	FALSE	down	FALSE	FALSE	FALSE	FALSE	69907	29820	59599	24436	91141	32121	28184	22489	21402	68548	20125	25928	--	--
Lmhp011549	C28H56NO7P	LysoPC 20:1	溶血磷脂酰胆碱 20:1	Lipids	脂质	LPC	溶血磷脂酰胆碱	-	A	FALSE	down	down	FALSE	down	FALSE	55967	20263	37285	18088	67089	31659	11915	16675	23254	20589	11996	13869	--	--
Lmhp008744	C33H56O14	1-α-Linolenoyl-glycerol-2,3-di-O-glucoside	1-α-亚麻酸甘油酯-2,3-二-O-葡萄糖苷	Lipids	脂质	Glycerol ester	甘油酯	-	A	FALSE	FALSE	down	FALSE	down	down	206500	112820	200860	110460	288130	265270	298910	91348	177020	101920	51284	33764	--	--
Lmhp008513	C33H56O14	2-α-Linolenoyl-glycerol-1,3-di-O-glucoside	2-α-亚麻酸甘油酯-1,3-二-O-葡萄糖苷	Lipids	脂质	Glycerol ester	甘油酯	-	A	FALSE	FALSE	down	FALSE	down	down	316490	207920	356140	242530	381650	480270	264380	229610	295870	102080	103070	69515	--	--
Lmhp009190	C33H58O14	2-Linoleoylglycerol-1,3-di-O-glucoside	2-亚油酰甘油酯-1,3-二-O-葡萄糖苷	Lipids	脂质	Glycerol ester	甘油酯	-	A	FALSE	FALSE	down	down	down	FALSE	26008	8628.5	17743	18459	30982	39617	11976	10981	8864.4	7093.5	7255.4	2047.1	--	--
Lmhp009384	C33H58O14	1-Linoleoylglycerol-2,3-di-O-glucoside	1-亚油酰甘油酯-2,3-二-O-葡萄糖苷	Lipids	脂质	Glycerol ester	甘油酯	-	A	FALSE	FALSE	down	FALSE	down	down	13203	7520.5	10402	10621	17990	13712	7876.2	12061	9144.6	6151.5	2865.7	3212	--	--
pmb0069	C7H7NO	Benzamide	苯甲酰胺	Phenolic acids	酚酸类	Phenolic acids	酚酸类	55-21-0	B	up	FALSE	FALSE	down	FALSE	FALSE	31712000	30514000	33033000	45586000	93791000	74501000	47135000	24667000	11821000	40880000	91435000	31708000	C09815	--
Lmhn003240	C11H10O6	Benzoylmalic acid	苯甲酰苹果酸	Phenolic acids	酚酸类	Phenolic acids	酚酸类	22138-51-8	A	up	down	down	down	down	FALSE	2173100	1689100	2176100	6374300	15692000	7624100	78649	95234	107410	53632	158990	77186	--	--
mws1297	C13H18O6	Benzyl glucoside	苄基葡萄糖苷	Phenolic acids	酚酸类	Phenolic acids	酚酸类	4304-12-5	A	up	up	up	FALSE	FALSE	FALSE	7603.7	6621.1	9555	51727	87697	49999	52692	86708	90168	88000	73386	106790	--	--
pma3724	C17H20O9	1-O-Feruloylquinic acid	1-O-阿魏酰奎宁酸	Phenolic acids	酚酸类	Phenolic acids	酚酸类	-	B	up	up	FALSE	down	down	FALSE	87917	64612	91646	433530	332470	350590	196760	197180	95959	137450	136080	72589	--	--
pmb0752	C17H20O9	3-O-Feruloylquinic acid	3-O-阿魏酰奎宁酸	Phenolic acids	酚酸类	Phenolic acids	酚酸类	1899-29-2	B	up	up	up	down	down	FALSE	62625	88003	78115	704710	437310	480960	316590	280160	113730	190280	143250	146390	C02572	--
Lmbp002309	C17H22O9	Sinapaldehyde-4-O-Glucoside	芥子醛-4-O-葡萄糖苷	Phenolic acids	酚酸类	Phenolic acids	酚酸类	154461-65-1	B	up	up	up	up	up	FALSE	19830	13561	6445.5	19524	35337	31859	73176	536500	385590	160910	88045	149900	--	--
pme3200	C2H7N3	1-methylguanidine	1-甲基胍	Nucleotides and derivatives	核苷酸及其衍生物	Nucleotides and derivatives	核苷酸及其衍生物	471-29-4	B	up	down	down	down	down	down	40113	27467	26454	51021	107940	59709	9	7407.1	1621.1	9	9	9	C02294	--
pmb0374	C5H5N5	2-Aminopurine	2-氨基嘌呤	Nucleotides and derivatives	核苷酸及其衍生物	Nucleotides and derivatives	核苷酸及其衍生物	452-06-2	A	up	FALSE	up	down	FALSE	up	50306	29486	75818	94635	432720	308470	69177	64912	45513	145340	141020	94307	--	--
Lmqp000329	C8H14N3O7P	5-Aminoimidazole ribonucleotide	5-氨基咪唑核糖核苷酸	Nucleotides and derivatives	核苷酸及其衍生物	Nucleotides and derivatives	核苷酸及其衍生物	25635-88-5	A	up	down	down	down	down	FALSE	210880	338530	236180	1009000	1055600	614780	75346	81911	36591	75364	159300	35556	--	--
Xmyp005654	C21H20O11	Kaempferol-4'-O-glucoside	山奈酚-4'-O-葡萄糖苷	Flavonoids	黄酮	Flavonoid	黄酮	-	A	up	FALSE	FALSE	FALSE	FALSE	FALSE	760110	658390	708080	1424900	1936300	1169100	5295700	970490	654620	456850	2443100	407300	--	--
Hmpp003270	C21H20O11	Luteolin-4'-O-glucoside	木犀草素-4'-O-葡萄糖苷	Flavonoids	黄酮	Flavonoid	黄酮	6920-38-3	A	up	down	down	down	down	up	6033700	5304400	5030700	9270900	12800000	11176000	894970	461650	404310	889790	2204300	657530	--	--
Lmtn002796	C21H22O11	Aromadendrin-7-O-glucoside	香橙素-7-O-葡萄糖苷	Flavonoids	黄酮	Flavonoid	黄酮	28189-90-4	B	up	FALSE	FALSE	down	down	FALSE	136850	150210	157000	603880	535660	550250	137710	101510	136660	80780	94139	86709	--	--
mws0057	C21H22O11	Eriodictyol-7-O-glucoside	圣草酚-7-O-葡萄糖苷	Flavonoids	黄酮	Dihydroflavone	二氢黄酮	38965-51-4	B	up	up	up	down	FALSE	FALSE	5849	3157	6190.5	98693	56940	74542	44423	33295	18893	17962	79544	35861	--	--
Lmmn004625	C21H22O11	Dihydrokaempferol-7-O-glucoside	二氢山奈酚-7-O-葡萄糖苷	Flavonoids	黄酮	Flavonols	黄酮醇	-	B	up	down	down	down	down	down	16829	7608.8	7224.8	40412	36211	23649	3574.6	2537	901.55	9	9	9	--	--
Lmzn001894	C21H18O12	Kaempferol-3-O-glucuronide	山奈酚-3-O-葡萄糖醛酸苷	Flavonoids	黄酮	Flavonols	黄酮醇	22688-78-4	A	up	FALSE	FALSE	down	down	down	941510	896300	837320	5085600	4329600	5181000	2012400	914080	803490	387310	606790	416200	--	--
Lmmp003767	C21H18O12	Kaempferol-7-O-glucuronide	山奈酚-7-O-葡萄糖醛酸苷	Flavonoids	黄酮	Flavonols	黄酮醇	-	B	up	up	up	FALSE	down	FALSE	407370	431510	736080	22636000	22412000	31812000	14959000	12948000	10739000	9989500	13857000	10204000	--	--
pmp000583	C22H20O12	Diosmetin-7-O-glucuronide	香叶木素-7-O-葡萄糖醛酸苷	Flavonoids	黄酮	Flavonoid	黄酮	35110-20-4	B	up	FALSE	FALSE	down	FALSE	FALSE	906060	610900	671160	1486300	2884200	1679400	972510	736570	309280	936910	1392900	269660	--	--
Lmmp003783	C21H18O13	Quercetin-3-O-glucuronide	槲皮素-3-O-葡萄糖醛酸苷	Flavonoids	黄酮	Flavonols	黄酮醇	22688-79-5	B	up	up	up	up	up	FALSE	9	9	9	110810	36439	90207	4756500	4697400	3512000	3355000	5389100	4274100	--	--
Lmmn003398	C23H22O12	Kaempferol-3-O-(6''-acetyl)glucoside	山奈酚-3-O-(6''-O-乙酰)葡萄糖苷	Flavonoids	黄酮	Flavonols	黄酮醇	-	B	up	FALSE	FALSE	down	FALSE	FALSE	28884	23182	22602	132720	115150	96282	50225	3865.8	12380	3835.4	122270	6774.5	--	--
pmp000587	C24H22O14	Luteolin-7-O-(6''-malonyl)glucoside	木犀草素-7-O-(6''-丙二酰)葡萄糖苷	Flavonoids	黄酮	Flavonoid	黄酮	-	A	up	FALSE	down	down	down	FALSE	9	2258.5	2261.3	17920	11612	24509	4384.7	9	9	9	9	9	C10103	--
Lmdp004892	C24H22O14	Kaempferol-3-O-(6''-malonyl)galactoside	山奈酚-3-O-(6''-丙二酰)半乳糖苷	Flavonoids	黄酮	Flavonols	黄酮醇	-	A	up	FALSE	FALSE	down	down	FALSE	390930	378880	407810	2022500	2663000	3069300	489890	68537	111390	28795	1320900	42974	--	--
pmb0608	C25H24O14	Chrysoeriol-7-O-(6''-malonyl)glucoside	金圣草黄素-7-O-(6''-丙二酰)葡萄糖苷	Flavonoids	黄酮	Flavonoid	黄酮	-	A	up	FALSE	FALSE	down	FALSE	FALSE	21429	18595	20719	102480	48679	87248	67849	12990	15998	7539.2	76762	15857	--	--
HJAP148	C26H28O15	Kaempferol-3-O-sambubioside	山奈酚-3-O-桑布双糖苷	Flavonoids	黄酮	Flavonoid	黄酮	27661-51-4	A	up	up	FALSE	down	down	down	734430	921880	965810	17980000	15097000	15332000	2856000	2148100	3888100	978140	904230	1788500	--	--
Lmsp004670	C27H30O15	Kaempferol-3-O-glucoside-7-O-rhamnoside	山奈酚-3-O-葡萄糖苷-7-O-鼠李糖苷	Flavonoids	黄酮	Flavonols	黄酮醇	-	A	up	up	FALSE	FALSE	down	FALSE	317260	461780	539190	2012700	1668700	1729600	1109400	872920	1527200	623410	969740	781200	--	--
pmp000593	C27H30O15	Luteolin-7-O-rutinoside*	木犀草素-7-O-芸香糖苷*	Flavonoids	黄酮	Flavonoid	黄酮	3563-98-2	A	up	up	up	down	FALSE	FALSE	81157	95822	112230	2079900	1538300	1407800	1127000	590300	345820	647920	1807900	522660	--	--
Lmjp002867	C27H30O15	Kaempferol-3-O-neohesperidoside*	山奈酚-3-O-新橙皮糖苷*	Flavonoids	黄酮	Flavonols	黄酮醇	32602-81-6	A	up	up	FALSE	FALSE	FALSE	FALSE	320770	486920	555020	1708900	1465900	1939100	1214700	873290	1701700	710610	1014700	856510	--	--
Zmcp003989	C27H30O15	Kaempferol-3-O-rhamnosyl(1→2)glucoside	山奈酚-3 -O-鼠李糖基(1→2)葡萄糖苷	Flavonoids	黄酮	Flavonoid	黄酮	-	A	up	up	up	down	down	FALSE	8299.6	6830.3	1016.9	1001900	1309500	938900	86174	50820	39328	44181	67839	34199	--	--
Hmjp003008	C27H28O16	Luteolin-7-O-glucuronide-5-O-rhamnoside	木犀草素-7-O-葡萄糖醛酸苷-5-O-鼠李糖苷	Flavonoids	黄酮	Flavonoid	黄酮	-	A	up	FALSE	FALSE	down	down	FALSE	2691900	2259600	2063300	13013000	19432000	18961000	2260400	3708600	4167300	1885300	2808600	2007200	--	--
pmp000596	C27H30O17	Quercetin-3-O-(2''-O-galactosyl)glucoside	槲皮素-3-O-(2''-O-半乳糖基)葡萄糖苷	Flavonoids	黄酮	Flavonols	黄酮醇	56782-99-1	A	up	up	up	FALSE	FALSE	FALSE	9	9	9	17268	14800	26272	23613	29449	23334	32368	9	36739	--	--
Zmlp003063	C33H40O19	Luteolin-7-O-(2''-O-rhamnosyl)rutinoside	木犀草素-7-O-(2''-O-鼠李糖基)芸香糖苷	Flavonoids	黄酮	Flavonoid	黄酮	-	B	up	up	up	down	down	FALSE	8855.4	7764	10409	1478400	1940800	1648200	104550	71224	43086	54617	83577	35151	--	--
Lmsp003881	C33H40O19	Kaempferol-3-O-rutinoside-7-O-rhamnoside	山奈酚-3-O-芸香糖苷-7-O-鼠李糖苷	Flavonoids	黄酮	Flavonols	黄酮醇	-	A	up	up	up	down	down	FALSE	298620	245850	243490	34079000	44712000	36298000	3116600	2554300	2068500	1986500	3557000	1648700	--	--
Hmqp002870	C32H38O20	Luteolin-7-O-Sophoroside-5-O-arabinoside	木犀草素-7-O-槐糖苷-5-O-阿拉伯糖苷	Flavonoids	黄酮	Flavonoid	黄酮	-	B	up	up	up	down	down	FALSE	5590	11626	10916	1916500	2723300	1748500	172370	138150	73848	81406	161400	54767	--	--
Lmyp003857	C35H28O19	Kaempferol-3-O-(2'',6''-digalloyl)glucoside	山奈酚-3-O-(2'',6''-二没食子酰)葡萄糖苷	Flavonoids	黄酮	Flavonoid	黄酮	-	B	up	up	up	down	down	FALSE	9325.2	13907	15691	918740	775950	832610	360120	361510	319440	254090	377010	286800	--	--
pmb0676	C38H40O19	Chrysoeriol-8-C-glucoside-7-O-(6''-feruloyl)glucoside	金圣草黄素-8-C-葡萄糖苷-7-O-(6''-阿魏酰)葡萄糖苷	Flavonoids	黄酮	Flavonoid carbonoside	黄酮碳糖苷	-	B	up	up	up	down	down	down	4702.7	6503.1	8269.3	363060	271740	246270	143700	93705	109830	45635	37014	45818	--	--
pmb0382	C19H14O6	O-Feruloyl 4-hydroxycoumarin	阿魏酰 4-羟基香豆素	Lignans and Coumarins	木脂素和香豆素	Coumarins	香豆素	-	B	up	up	up	FALSE	FALSE	FALSE	9	39462	45483	1393800	669720	711470	648200	758250	617760	828820	1147500	1129100	--	--
Lmgp003270	C16H16O10	Scopoletin-7-O-glucuronide	东莨菪内酯-7-O-葡萄糖醛酸苷	Lignans and Coumarins	木脂素和香豆素	Coumarins	香豆素	132752-65-9	B	up	up	FALSE	down	down	FALSE	52796	42740	44711	413960	257540	216220	144150	107590	46467	82367	99306	60516	--	--
pma0134	C4H8O4	D-(-)-Threose	D-(-)-苏阿糖	Others	其它类	Saccharides and Alcohols	糖及醇类	95-43-2	B	up	FALSE	up	down	FALSE	FALSE	65541	52116	53302	97315	213870	142120	85721	80394	48872	137290	153030	126410	C06463	--
pma0948	C8H11NO	Phenylethanolamine	苯基乙醇胺	Alkaloids	生物碱	Alkaloids	生物碱	7568-93-6	B	up	FALSE	up	down	FALSE	up	1084500	787450	800560	1391400	3071900	2197000	978610	1019600	524410	1808300	2094400	1612600	C02735	--
Lmlp003024	C20H30O7N4	N'-p-Coumaroylagmatine-glucoside	N'-对香豆酰丁胺葡萄糖苷	Alkaloids	生物碱	Phenolamine	酚胺	-	B	up	down	down	down	down	FALSE	45240	53168	55959	84348	76584	160070	15073	9	9	10420	9	9	--	--
Lmsn009589	C30H48O6	2α,3β,19α,23-Tetrahydroxyurs-12-en-28-oic acid	2α,3β,19α,23-四羟基熊果-12-烯-28-酸	Terpenoids	萜类	Triterpene	三萜	-	B	up	up	up	FALSE	FALSE	FALSE	9	9	9	1452.1	1603.8	1420.4	3662.4	1979.9	1258.9	1659	3013.1	662.43	--	--
Wmzn000227	C6H10O4	2,2-Dimethylsuccinic acid	2,2-二甲基琥珀酸	Organic acids	有机酸	Organic acids	有机酸	597-43-3	A	up	up	up	FALSE	FALSE	FALSE	30069	17149	22461	51027	60352	67849	81279	65450	52155	110380	124800	35099	--	--
YC512118	C18H35NO	Oleamide (9-Octadecenamide)	油酸酰胺 (9-十八碳烯酰胺)	Lipids	脂质	Free fatty acids	游离脂肪酸	301-02-0	A	up	up	FALSE	FALSE	FALSE	down	13141	7909.4	6354.9	15418	29743	18906	23827	18939	72796	10710	11719	29554	C19670	--
Lmhp007598	C27H52NO7P	LysoPC 19:2(2n isomer)	溶血磷脂酰胆碱 19:2(2n异构)	Lipids	脂质	LPC	溶血磷脂酰胆碱	-	A	up	FALSE	FALSE	FALSE	down	FALSE	5566.7	5536.6	6649.5	7641.1	16407	18184	10291	7592.3	6169.2	4825.7	8797.4	6472.4	--	--

## Sheet: Sheet1
Table S14 A total of differentially significant metabolites in R-R, R-W, R-Y and R-B
Index	Formula	Compounds	Class I	Class II	Level	R-R_vs_R-W	R-R_vs_R-Y	R-R_vs_R-B	R-W_vs_R-Y	R-W_vs_R-B	R-Y_vs_R-B	R-R1	R-R2	R-R3	R-W1	R-W2	R-W3	R-Y1	R-Y2	R-Y3	R-B1	R-B2	R-B3	cpd_ID	kegg_map
pme3200	C2H7N3	1-methylguanidine	Nucleotides and derivatives	Nucleotides and derivatives	B	up	down	down	down	down	down	40113	27467	26454	51021	107940	59709	9	7407.1	1621.1	9	9	9	C02294	--
Lmmn004625	C21H22O11	Dihydrokaempferol-7-O-glucoside	Flavonoids	Flavonols	B	up	down	down	down	down	down	16829	7608.8	7224.8	40412	36211	23649	3574.6	2537	901.55	9	9	9	--	--
pmb0676	C38H40O19	Chrysoeriol-8-C-glucoside-7-O-(6''-feruloyl)glucoside	Flavonoids	Flavonoid carbonoside	B	up	up	up	down	down	down	4702.7	6503.1	8269.3	363060	271740	246270	143700	93705	109830	45635	37014	45818	--	--
Hmcp002316	C21H20O11	Isorhamnetin-3-O-arabinoside	Flavonoids	Flavonols	A	down	down	down	up	up	down	8535900	6706200	5327000	48149	67177	68961	853170	1160600	612720	160740	912930	108090	--	--
pmp000509	C6H6O3	Maltol	Others	Others	B	down	down	down	down	down	up	804920	702230	841980	196710	243050	274520	9	9	9	58213	67571	55135	C11918	ko00523,ko01110
Hmpp003270	C21H20O11	Luteolin-4'-O-glucoside	Flavonoids	Flavonoid	A	up	down	down	down	down	up	6033700	5304400	5030700	9270900	12800000	11176000	894970	461650	404310	889790	2204300	657530	--	--
Lmtn000940	C14H18O10	1-O-(3,4-Dihydroxy-5-methoxy-benzoyl)-glucoside	Phenolic acids	Phenolic acids	B	down	down	up	up	up	up	35947	49272	36500	9277.7	3968.4	6205.9	14749	16861	16763	108370	109940	121150	--	--
