# Supplementary material for: Elucidating the Differentiation Synthesis Mechanisms of Differently Colored Resistance Quinoa Seedings Using Metabolite Profiling and Transcriptome Analysis
Source: Metabolites. 2023 Oct 10;13(10):1065. doi: 10.3390/metabo13101065 (PMC10609267; doi:10.3390/metabo13101065)
Supplement: Supplementary file 1 [file metabolites-13-01065-s001.zip › Table S15.xlsx]

## Sheet: Sheet1
Table S15 Number of differential genes in R-RvsR-W
ID	R-R1_fpkm	R-R2_fpkm	R-R3_fpkm	R-W1_fpkm	R-W2_fpkm	R-W3_fpkm	R-R1_count	R-R2_count	R-R3_count	R-W1_count	R-W2_count	R-W3_count	FoldChange	log2FoldChange	pvalue	padj	regulated	chr	start	end	strand	gene_name	gene_description	KEGG	NR	Swissprot	Tremble	KOG	GO	Pfam
gene-CDC77_pgt016	8.43	66.96	2.29	3.02	1.16	3.48	15	117	4	5	2	6	0.073	-3.784	0.00154439	0.0255832	down	NC_034949.1	47057	47705	+	trnL-UAA	--	--	--	--	--	--	--	--
gene-LOC110681673	100.5	86.85	87.48	58.61	47.69	51.46	4591	3898	3932	2494	2121	2278	0.479	-1.063	4.6567e-05	0.00133183	down	NW_018742244.1	2770991	2775852	+	LOC110681673	--	K01626 3-deoxy-7-phosphoheptulonate synthase [EC:2.5.1.54] | (RefSeq) phospho-2-dehydro-3-deoxyheptonate aldolase 2, chloroplastic-like (A)	phospho-2-dehydro-3-deoxyheptonate aldolase 2, chloroplastic-like [Chenopodium quinoa]	RecName: Full=Phospho-2-dehydro-3-deoxyheptonate aldolase 2, chloroplastic; EC=2.5.1.54; AltName: Full=3-deoxy-D-arabino-heptulosonate 7-phosphate synthase 2; AltName: Full=DAHP synthase 2; AltName: Full=Phospho-2-keto-3-deoxyheptonate aldolase 2; Flags: Precursor;	RecName: Full=Phospho-2-dehydro-3-deoxyheptonate aldolase {ECO:0000256|RuleBase:RU363071}; EC=2.5.1.54 {ECO:0000256|RuleBase:RU363071};	--	GO:0009507,chloroplast; GO:0009534,chloroplast thylakoid; GO:0003849,3-deoxy-7-phosphoheptulonate synthase activity; GO:0009073,aromatic amino acid family biosynthetic process; GO:0009423,chorismate biosynthetic process	Class-II DAHP synthetase family
gene-LOC110681692	2.8	1.98	4	0.09	0.13	0.04	66	46	93	2	3	1	0.026	-5.265	5.12162e-14	6.74619e-12	down	NW_018742244.1	2783509	2785966	-	LOC110681692	--	K17744 L-galactose dehydrogenase [EC:1.1.1.316] | (RefSeq) L-galactose dehydrogenase-like (A)	L-galactose dehydrogenase-like [Chenopodium quinoa]	RecName: Full=L-galactose dehydrogenase; Short=At-GalDH; Short=L-GalDH; EC=1.1.1.316;	SubName: Full=Uncharacterized protein {ECO:0000313|EMBL:KNA10025.1};	Predicted oxidoreductase	GO:0005829,cytosol; GO:0010349,L-galactose dehydrogenase activity; GO:0006012,galactose metabolic process; GO:0019853,L-ascorbic acid biosynthetic process	Aldo/keto reductase family
gene-LOC110681714	20.82	20.29	23.37	9.86	10.34	11.93	852	816	941	376	412	473	0.42	-1.252	3.73954e-08	2.0512e-06	down	NW_018742244.1	2789270	2801375	+	LOC110681714	--	--	2-carboxy-1,4-naphthoquinone phytyltransferase, chloroplastic-like isoform X1 [Chenopodium quinoa]	RecName: Full=2-carboxy-1,4-naphthoquinone phytyltransferase, chloroplastic; EC=2.5.1.130 {ECO:0000269|PubMed:15686525}; AltName: Full=1,4-dihydroxy-2-naphthoate phytyltransferase; AltName: Full=1,4-dihydroxy-2-naphthoate polyprenyltransferase; AltName: Full=Protein ABERRANT CHLOROPLAST DEVELOPMENT 4; AltName: Full=menA-like protein; Short=AtMENA; Flags: Precursor;	SubName: Full=Uncharacterized protein {ECO:0000313|EMBL:KNA23347.1};	Predicted membrane protein	GO:0009507,chloroplast; GO:0031969,chloroplast membrane; GO:0016021,integral component of membrane; GO:0046428,1,4-dihydroxy-2-naphthoate octaprenyltransferase activity; GO:0004659,prenyltransferase activity; GO:0009772,photosynthetic electron transport in photosystem II; GO:0042372,phylloquinone biosynthetic process; GO:0010236,plastoquinone biosynthetic process; GO:0032194,ubiquinone biosynthet…	UbiA prenyltransferase family
gene-LOC110681738	4.65	3.89	4.24	1.62	1.94	1.8	503	414	452	163	204	189	0.349	-1.519	1.81879e-10	1.46687e-08	down	NW_018743574.1	913577	924422	-	LOC110681738	--	--	--	--	--	--	--	--
gene-LOC110681934	297.95	294.06	231.98	201.85	156.98	133.57	6377	6183	4885	4024	3271	2770	0.489	-1.033	0.00134391	0.0228591	down	NW_018743574.1	1743602	1746109	+	LOC110681934	--	K02899 large subunit ribosomal protein L27 | (RefSeq) 50S ribosomal protein L27, chloroplastic-like (A)	50S ribosomal protein L27, chloroplastic-like [Chenopodium quinoa]	RecName: Full=50S ribosomal protein L27, chloroplastic {ECO:0000303|PubMed:10874046}; AltName: Full=CL27; AltName: Full=Chloroplastic large ribosomal subunit protein bL27c {ECO:0000303|PubMed:28007896}; Flags: Precursor;	SubName: Full=Uncharacterized protein {ECO:0000313|EMBL:KJB33993.1};	Mitochondrial ribosomal protein MRP7 (L2)	GO:0009507,chloroplast; GO:0005840,ribosome; GO:0003735,structural constituent of ribosome; GO:0006412,translation	Ribosomal L27 protein
gene-LOC110681981	0.42	2.03	0.2	0.08	0.04	0.12	11	52	5	2	1	3	0.068	-3.872	0.00107283	0.0190571	down	NW_018743574.1	2208169	2209471	+	LOC110681981	--	--	uncharacterized protein LOC110681981 [Chenopodium quinoa]	--	SubName: Full=Uncharacterized protein {ECO:0000313|EMBL:KNA20593.1};	--	GO:0016021,integral component of membrane	--
gene-LOC110682026	2	1.26	2.69	0.79	0.87	0.44	71	44	94	26	30	15	0.302	-1.73	9.53381e-06	0.000329631	down	NW_018742244.1	3026560	3029685	-	LOC110682026	--	--	--	--	--	--	--	--
gene-LOC110682029	2.47	15.23	1.48	1.01	0.93	0.97	68	412	40	26	25	26	0.112	-3.16	0.000270562	0.00599503	down	NW_018743574.1	2707671	2709048	+	LOC110682029	--	K19040 E3 ubiquitin-protein ligase ATL10/75/76/77/78 [EC:2.3.2.27] | (RefSeq) RING-H2 finger protein ATL78-like (A)	RING-H2 finger protein ATL78-like [Chenopodium quinoa]	RecName: Full=RING-H2 finger protein ATL78; EC=2.3.2.27 {ECO:0000305}; AltName: Full=RING-type E3 ubiquitin transferase ATL78 {ECO:0000305};	SubName: Full=Uncharacterized protein {ECO:0000313|EMBL:KNA25175.1};	FOG: Predicted E3 ubiquitin ligase	GO:0016021,integral component of membrane; GO:0046872,metal ion binding; GO:0061630,ubiquitin protein ligase activity; GO:0043161,proteasome-mediated ubiquitin-dependent protein catabolic process	Ring finger domain
gene-LOC110682042	3.64	2.25	5.27	2.37	2.3	1.33	99	60	141	60	61	35	0.466	-1.101	0.0018475	0.0295871	down	NW_018743574.1	2868246	2869606	+	LOC110682042	--	--	uncharacterized protein LOC110682042 [Chenopodium quinoa]	--	SubName: Full=Uncharacterized protein {ECO:0000313|EMBL:KNA23938.1};	--	GO:0016021,integral component of membrane	--
gene-LOC110682088	4.8	2.98	4.69	1.81	1.98	1.93	77	47	74	27	31	30	0.39	-1.358	8.12045e-05	0.00213187	down	NW_018743574.1	3372129	3372931	+	LOC110682088	--	--	protein SKIP34-like [Chenopodium quinoa]	--	--	--	--	Type II secretion system (T2SS), protein F
gene-LOC110682268	0.14	0.54	0.18	0	0	0	4	15	5	0	0	0	0.018	-5.764	0.000841857	0.0156403	down	NW_018743574.1	5267369	5270337	+	LOC110682268	--	K15634 probable phosphoglycerate mutase [EC:5.4.2.12] | (RefSeq) phosphoglycerate mutase-like protein 4 isoform X1 (A)	phosphoglycerate mutase-like protein 4 isoform X1 [Chenopodium quinoa]	RecName: Full=Phosphoglycerate mutase-like protein 4 {ECO:0000305};	SubName: Full=Uncharacterized protein {ECO:0000313|EMBL:KNA24193.1};	Phosphoglycerate mutase	GO:0005829,cytosol; GO:0016791,phosphatase activity	Histidine phosphatase superfamily (branch 1)
gene-LOC110682269	21.06	30.63	12.04	6.56	6.85	5.97	455	650	256	132	144	125	0.238	-2.07	1.15087e-05	0.000391162	down	NW_018743574.1	5255519	5258232	+	LOC110682269	--	K15634 probable phosphoglycerate mutase [EC:5.4.2.12] | (RefSeq) phosphoglycerate mutase-like protein 4 (A)	phosphoglycerate mutase-like protein 4 [Chenopodium quinoa]	RecName: Full=Phosphoglycerate mutase-like protein 4 {ECO:0000305};	SubName: Full=Uncharacterized protein {ECO:0000313|EMBL:KNA24193.1};	Phosphoglycerate mutase	GO:0005829,cytosol; GO:0016791,phosphatase activity	Histidine phosphatase superfamily (branch 1)
gene-LOC110682333	0.65	1.34	0.36	0.02	0	0	29	59	16	1	0	0	0.008	-6.927	1.26706e-06	5.24274e-05	down	NW_018742244.1	3426327	3428561	-	LOC110682333	--	--	--	--	--	--	--	--
gene-LOC110682342	0.13	0.11	0.2	0.02	0	0.02	9	7	13	1	0	1	0.062	-4.008	0.00189678	0.030123	down	NW_018742244.1	3417157	3420707	-	LOC110682342	--	--	--	--	--	--	--	--
gene-LOC110682361	0.36	0.14	0.4	0.07	0.04	0.04	27	10	29	5	3	3	0.151	-2.727	0.000202064	0.0046703	down	NW_018742244.1	3411740	3416567	+	LOC110682361	--	K19747 BAHD acyltransferase [EC:2.3.1.-] | (RefSeq) BAHD acyltransferase DCR-like (A)	uncharacterized acetyltransferase At3g50280-like [Chenopodium quinoa]	RecName: Full=Uncharacterized acetyltransferase At3g50280; EC=2.3.1.-;	SubName: Full=Uncharacterized protein {ECO:0000313|EMBL:KNA08733.1};	--	GO:0016747,transferase activity, transferring acyl groups other than amino-acyl groups	Transferase family
gene-LOC110682435	9.82	7.64	7.19	5.53	4.79	4.17	204	156	147	107	97	84	0.486	-1.042	0.00136234	0.0231002	down	NW_018743574.1	7300719	7303710	-	LOC110682435	--	--	uncharacterized protein LOC110682435 [Chenopodium quinoa]	--	SubName: Full=Uncharacterized protein {ECO:0000313|EMBL:KNA12099.1}; Flags: Fragment;	--	--	--
gene-LOC110682672	0.81	0.45	2.33	0.13	0.08	0	33	18	94	5	3	0	0.052	-4.253	1.67642e-06	6.75304e-05	down	NW_018743575.1	684570	687212	+	LOC110682672	--	--	uncharacterized protein LOC110682672 [Chenopodium quinoa]	--	SubName: Full=Uncharacterized protein {ECO:0000313|EMBL:KZM83783.1};	--	--	--
gene-LOC110682699	0.66	0.29	0.4	0	0	0	56	24	33	0	0	0	0.004	-7.883	3.24113e-09	2.09119e-07	down	NW_018743591.1	276232	280709	-	LOC110682699	--	--	--	--	--	--	--	--
gene-LOC110682750	0.39	0.71	1.41	0	0	0	10	18	36	0	0	0	0.008	-6.996	7.69435e-07	3.30961e-05	down	NW_018743593.1	778475	779906	+	LOC110682750	--	K17609 nucleoredoxin [EC:1.8.1.8] | (RefSeq) hypothetical protein (A)	uncharacterized protein LOC110682750 [Chenopodium quinoa]	--	SubName: Full=Uncharacterized protein {ECO:0000313|EMBL:KMS95847.1};	--	--	--
gene-LOC110682751	0.06	0.09	0.23	0	0	0	5	7	18	0	0	0	0.017	-5.881	0.000190119	0.00442917	down	NW_018742249.1	105369	109443	+	LOC110682751	--	K17604 zinc finger SWIM domain-containing protein 3 | (RefSeq) LOW QUALITY PROTEIN: uncharacterized protein LOC111898448 (A)	uncharacterized protein LOC110682751 [Chenopodium quinoa]	--	SubName: Full=uncharacterized protein LOC109000249 {ECO:0000313|RefSeq:XP_018832622.1};	--	--	--
gene-LOC110682803	6.72	5.51	10.77	0	0	0	227	183	358	0	0	0	0.001	-10.6	2.28278e-18	5.95775e-16	down	NW_018743593.1	3182145	3183903	+	LOC110682803	--	--	--	--	--	--	--	--
gene-LOC110682827	1.32	0.61	1.69	0	0	0.1	42	19	53	0	0	3	0.024	-5.373	2.00153e-07	9.55986e-06	down	NW_018743593.1	779901	781491	+	LOC110682827	--	K17609 nucleoredoxin [EC:1.8.1.8] | (RefSeq) probable nucleoredoxin 1 (A)	probable nucleoredoxin 1, partial [Chenopodium quinoa]	RecName: Full=Probable nucleoredoxin 1; Short=AtNrx1; EC=1.8.1.8;	SubName: Full=Uncharacterized protein {ECO:0000313|EMBL:KMS95847.1};	Thioredoxin, nucleoredoxin and related proteins	GO:0005829,cytosol; GO:0047134,protein-disulfide reductase activity; GO:0004791,thioredoxin-disulfide reductase activity; GO:0045454,cell redox homeostasis; GO:0009860,pollen tube growth; GO:0010183,pollen tube guidance; GO:0080092,regulation of pollen tube growth; GO:0046686,response to cadmium ion	Thioredoxin-like
gene-LOC110682845	0.72	0.86	0.59	0.18	0.07	0.2	30	35	24	7	3	8	0.173	-2.531	0.000120333	0.00299336	down	NW_018743593.1	2296901	2302048	-	LOC110682845	--	K01535 H+-transporting ATPase [EC:7.1.2.1] | (RefSeq) plasma membrane ATPase 1-like (A)	plasma membrane ATPase 1-like [Chenopodium quinoa]	RecName: Full=ATPase 11, plasma membrane-type; EC=3.6.3.6; AltName: Full=Proton pump 11;	SubName: Full=Uncharacterized protein {ECO:0000313|EMBL:PKI78027.1};	Plasma membrane H+-transporting ATPase	GO:0016021,integral component of membrane; GO:0016020,membrane; GO:0005886,plasma membrane; GO:0005524,ATP binding; GO:0008553,proton-exporting ATPase activity, phosphorylative mechanism; GO:0046872,metal ion binding; GO:0006754,ATP biosynthetic process	E1-E2 ATPase
gene-LOC110682883	4.12	4.4	5.32	2.23	2.91	2.12	240	252	305	121	165	120	0.439	-1.187	7.61111e-08	3.96351e-06	down	NW_018743608.1	475677	478594	-	LOC110682883	--	K17964 leucine-rich PPR motif-containing protein, mitochondrial | (RefSeq) hypothetical protein (A)	pentatricopeptide repeat-containing protein At1g79080, chloroplastic-like [Chenopodium quinoa]	RecName: Full=Pentatricopeptide repeat-containing protein At1g79080, chloroplastic; Flags: Precursor;	SubName: Full=Uncharacterized protein {ECO:0000313|EMBL:KNA09301.1};	FOG: PPR repeat	GO:0009507,chloroplast; GO:0043231,intracellular membrane-bounded organelle; GO:0004519,endonuclease activity; GO:0003723,RNA binding; GO:0009451,RNA modification	PPR repeat family
gene-LOC110682964	5.81	3.94	7.76	2.75	2.97	2.05	354	236	465	156	176	121	0.382	-1.39	2.70022e-09	1.77223e-07	down	NW_018743616.1	193724	202563	-	LOC110682964	--	K16609 tubulin--tyrosine ligase-like protein 12 | (RefSeq) tubulin--tyrosine ligase-like protein 12 isoform X1 (A)	tubulin--tyrosine ligase-like protein 12 isoform X1 [Chenopodium quinoa]	--	SubName: Full=Uncharacterized protein {ECO:0000313|EMBL:KNA13239.1};	Tubulin-tyrosine ligase-related protein	GO:0005524,ATP binding; GO:0003824,catalytic activity; GO:0006464,cellular protein modification process	Tubulin-tyrosine ligase family
gene-LOC110683018	1.88	2.17	1.95	0.71	1.22	0.94	54	61	55	19	34	26	0.393	-1.347	0.000734736	0.0139846	down	NW_018743616.1	1772321	1773755	-	LOC110683018	--	K11982 E3 ubiquitin-protein ligase RNF115/126 [EC:2.3.2.27] | (RefSeq) E3 ubiquitin-protein ligase RING1-like (A)	E3 ubiquitin-protein ligase SGR9, amyloplastic-like [Chenopodium quinoa]	RecName: Full=E3 ubiquitin-protein ligase SGR9, amyloplastic; EC=2.3.2.27; AltName: Full=Protein SHOOT GRAVITROPISM 9; AltName: Full=RING-type E3 ubiquitin transferase SGR9 {ECO:0000305}; Flags: Precursor;	SubName: Full=Uncharacterized protein {ECO:0000313|EMBL:KNA22040.1};	FOG: Predicted E3 ubiquitin ligase	GO:0009501,amyloplast; GO:0046872,metal ion binding; GO:0061630,ubiquitin protein ligase activity; GO:0004842,ubiquitin-protein transferase activity; GO:0009630,gravitropism; GO:0043161,proteasome-mediated ubiquitin-dependent protein catabolic process; GO:0000209,protein polyubiquitination; GO:0042787,NA	Ring finger domain
gene-LOC110683029	0.31	0.32	2.45	0	0.11	0.05	6	6	46	0	2	1	0.05	-4.323	0.000964019	0.0175585	down	NW_018742204.1	18978603	18979557	+	LOC110683029	--	K23260 scopoletin glucosyltransferase [EC:2.4.1.128] | (RefSeq) scopoletin glucosyltransferase-like (A)	UDP-glycosyltransferase 89A2-like, partial [Chenopodium quinoa]	RecName: Full=UDP-glycosyltransferase 89A2; EC=2.4.1.-;	SubName: Full=Uncharacterized protein {ECO:0000313|EMBL:KNA15373.1};	UDP-glucuronosyl and UDP-glucosyl transferase	GO:0043231,intracellular membrane-bounded organelle; GO:0080043,quercetin 3-O-glucosyltransferase activity; GO:0080044,quercetin 7-O-glucosyltransferase activity; GO:0035251,UDP-glucosyltransferase activity; GO:0008194,UDP-glycosyltransferase activity; GO:0008152,metabolic process	UDP-glucoronosyl and UDP-glucosyl transferase
gene-LOC110683163	0.51	0.73	0.93	0.33	0.45	0.15	36	51	65	22	31	10	0.356	-1.491	0.00215007	0.0331363	down	NW_018743623.1	212737	216401	+	LOC110683163	--	K15078 structure-specific endonuclease subunit SLX1 [EC:3.6.1.-] | (RefSeq) putative disease resistance protein RGA3 (A)	putative disease resistance protein RGA4 [Chenopodium quinoa]	RecName: Full=Putative disease resistance protein RGA3; AltName: Full=Blight resistance protein B149; AltName: Full=RGA1-blb;	SubName: Full=Uncharacterized protein {ECO:0000313|EMBL:KMS96021.1};	Apoptotic ATPase	GO:0043531,ADP binding; GO:0005524,ATP binding; GO:0006952,defense response	NB-ARC domain
gene-LOC110683191	1.41	1.32	2.28	0.03	0	0.03	91	84	145	2	0	2	0.011	-6.486	2.95463e-16	5.28047e-14	down	NW_018743623.1	861779	866062	+	LOC110683191	--	--	--	--	--	--	--	--
gene-LOC110683195	1.95	2.27	2.35	0.96	0.54	0.98	70	80	83	32	19	34	0.319	-1.647	7.79292e-05	0.00206009	down	NW_018743623.1	931064	936099	-	LOC110683195	--	K17964 leucine-rich PPR motif-containing protein, mitochondrial | (RefSeq) putative pentatricopeptide repeat-containing protein At1g19290 (A)	pentatricopeptide repeat-containing protein At2g20710, mitochondrial-like [Chenopodium quinoa]	RecName: Full=Pentatricopeptide repeat-containing protein At2g20710, mitochondrial; Flags: Precursor;	SubName: Full=Uncharacterized protein {ECO:0000313|EMBL:KNA13220.1};	FOG: PPR repeat	GO:0043231,intracellular membrane-bounded organelle; GO:0005739,mitochondrion; GO:0004519,endonuclease activity; GO:0003723,RNA binding; GO:0009451,RNA modification	PPR repeat
gene-LOC110683216	0.41	0.28	0.28	0	0	0	12	8	8	0	0	0	0.017	-5.887	0.000112055	0.00283428	down	NW_018742263.1	6753529	6755311	+	LOC110683216	--	--	uncharacterized protein LOC110683216 [Chenopodium quinoa]	--	SubName: Full=Uncharacterized protein {ECO:0000313|EMBL:KNA03285.1}; Flags: Fragment;	--	--	Plant transposase (Ptta/En/Spm family)
gene-LOC110683225	1.91	1.7	1.3	0	0	0	78	68	52	0	0	0	0.002	-8.732	9.20524e-12	8.8266e-10	down	NW_018742263.1	6778078	6780906	+	LOC110683225	--	--	--	--	--	--	--	--
gene-LOC110683230	0.36	0.73	0.67	0	0	0.06	6	12	11	0	0	1	0.032	-4.976	0.000795835	0.0149679	down	NW_018743636.1	50476	51309	+	LOC110683230	--	K15121 solute carrier family 25, member 44 | (RefSeq) uncharacterized protein LOC112037286 (A)	uncharacterized protein LOC110683230 [Chenopodium quinoa]	--	SubName: Full=Uncharacterized protein {ECO:0000313|EMBL:KNA11865.1};	--	GO:0016021,integral component of membrane	Domain of unknown function
gene-LOC110683300	1.83	1.04	1.89	0	0	0	61	34	62	0	0	0	0.003	-8.328	4.67288e-11	4.08926e-09	down	NW_018743669.1	2654157	2655919	+	LOC110683300	--	K15255 ATP-dependent DNA helicase PIF1 [EC:3.6.4.12] | (RefSeq) ATP-dependent DNA helicase PIF2-like (A)	ATP-dependent DNA helicase PIF2-like [Chenopodium quinoa]	--	RecName: Full=ATP-dependent DNA helicase {ECO:0000256|RuleBase:RU363044}; EC=3.6.4.12 {ECO:0000256|RuleBase:RU363044};	DNA helicase PIF1/RRM3	GO:0005524,ATP binding; GO:0003678,DNA helicase activity; GO:0006310,DNA recombination; GO:0006281,DNA repair; GO:0000723,telomere maintenance	PIF1-like helicase
gene-LOC110683324	0.56	0.36	0.83	0	0	0	11	7	16	0	0	0	0.015	-6.096	3.32613e-05	0.000988412	down	NW_018743669.1	2249306	2250370	-	LOC110683324	--	K02218 casein kinase 1 [EC:2.7.11.1] | (RefSeq) uncharacterized protein LOC8069780 (A)	putative nuclease HARBI1 [Chenopodium quinoa]	RecName: Full=Protein ALP1-like {ECO:0000305}; EC=3.1.-.-;	SubName: Full=PIF-like transposase {ECO:0000313|EMBL:ABB83644.1};	Predicted transposase	GO:0005634,nucleus; GO:0046872,metal ion binding; GO:0004518,nuclease activity	DDE superfamily endonuclease
gene-LOC110683330	2.09	1.98	5.02	0	0	0	30	28	71	0	0	0	0.004	-7.995	8.66084e-10	6.19903e-08	down	NW_018743669.1	2653315	2654111	+	LOC110683330	--	K15255 ATP-dependent DNA helicase PIF1 [EC:3.6.4.12] | (RefSeq) uncharacterized protein LOC110712983 (A)	uncharacterized protein LOC110683330 [Chenopodium quinoa]	--	SubName: Full=Uncharacterized protein {ECO:0000313|EnsemblPlants:ORUFI11G24680.1};	DNA helicase PIF1/RRM3	--	--
gene-LOC110683402	71.92	86.97	21.19	22.97	7.27	20.75	2225	2643	645	662	219	622	0.225	-2.151	0.00130623	0.022328	down	NW_018743669.1	605402	608199	+	LOC110683402	--	K00799 glutathione S-transferase [EC:2.5.1.18] | (RefSeq) probable glutathione S-transferase (A)	probable glutathione S-transferase [Chenopodium quinoa]	RecName: Full=Probable glutathione S-transferase; EC=2.5.1.18; AltName: Full=Auxin-induced protein PCNT107;	SubName: Full=Uncharacterized protein {ECO:0000313|EMBL:KNA21418.1};	Glutathione S-transferase	GO:0004364,glutathione transferase activity; GO:0009734,auxin-activated signaling pathway	Glutathione S-transferase, N-terminal domain
gene-LOC110683482	34.64	43.26	20.43	19.3	12.6	16.21	1451	1780	842	753	514	658	0.392	-1.35	0.00262598	0.0389979	down	NW_018743669.1	1294026	1305842	-	LOC110683482	--	K17871 NADH:ubiquinone reductase (non-electrogenic) [EC:1.6.5.9] | (RefSeq) internal alternative NAD(P)H-ubiquinone oxidoreductase A1, mitochondrial-like (A)	internal alternative NAD(P)H-ubiquinone oxidoreductase A1, mitochondrial-like [Chenopodium quinoa]	RecName: Full=Internal alternative NAD(P)H-ubiquinone oxidoreductase A1, mitochondrial; EC=1.6.5.9; AltName: Full=Internal alternative NADH dehydrogenase NDA1; AltName: Full=Internal non-phosphorylating NAD(P)H dehydrogenase 1; Short=StNDI1; AltName: Full=NADH:ubiquinone reductase (non-electrogenic) NDA1; Flags: Precursor;	SubName: Full=Uncharacterized protein {ECO:0000313|EMBL:KNA22463.1};	NADH-dehydrogenase (ubiquinone)	GO:0005743,mitochondrial inner membrane; GO:0005759,mitochondrial matrix; GO:0005777,peroxisome; GO:0003959,NADPH dehydrogenase activity; GO:0055114,oxidation-reduction process	Pyridine nucleotide-disulphide oxidoreductase
gene-LOC110683523	1.17	0.98	0.95	0.19	0.18	0.45	40	33	32	6	6	15	0.223	-2.163	0.000279095	0.00616259	down	NW_018743669.1	1661988	1667293	-	LOC110683523	--	K16297 serine carboxypeptidase-like clade II [EC:3.4.16.-] | (RefSeq) serine carboxypeptidase II-3-like (A)	serine carboxypeptidase II-3-like [Chenopodium quinoa]	RecName: Full=Serine carboxypeptidase II-3; EC=3.4.16.6; AltName: Full=CP-MII.3; Contains: RecName: Full=Serine carboxypeptidase II-3 chain A; Contains: RecName: Full=Serine carboxypeptidase II-3 chain B; Flags: Precursor;	RecName: Full=Carboxypeptidase {ECO:0000256|RuleBase:RU361156}; EC=3.4.16.- {ECO:0000256|RuleBase:RU361156}; Flags: Fragment;	Serine carboxypeptidases (lysosomal cathepsin A)	GO:0004185,serine-type carboxypeptidase activity	Serine carboxypeptidase
gene-LOC110683569	17.51	13.75	23.95	0	0	0	512	395	689	0	0	0	0	-11.668	2.54245e-22	1.07537e-19	down	NW_018743669.1	2252608	2255668	-	LOC110683569	--	K13484 5-hydroxyisourate hydrolase / 2-oxo-4-hydroxy-4-carboxy-5-ureidoimidazoline decarboxylase [EC:3.5.2.17 4.1.1.97] | (RefSeq) L10-interacting MYB domain-containing protein-like (A)	L10-interacting MYB domain-containing protein-like [Chenopodium quinoa]	RecName: Full=L10-interacting MYB domain-containing protein {ECO:0000303|PubMed:25707794};	SubName: Full=Uncharacterized protein {ECO:0000313|EMBL:KNA13501.1};	--	GO:0005634,nucleus; GO:0006355,regulation of transcription, DNA-templated; GO:0006351,transcription, DNA-templated	Myb/SANT-like DNA-binding domain
gene-LOC110683644	1.4	0.8	2.21	0.47	0.45	0.68	119	67	185	37	37	56	0.323	-1.632	3.38551e-05	0.00100293	down	NW_018743689.1	881670	913389	-	LOC110683644	--	K01303 acylaminoacyl-peptidase [EC:3.4.19.1] | (RefSeq) uncharacterized LOC101311565 (A)	uncharacterized protein LOC110683644 [Chenopodium quinoa]	RecName: Full=Uncharacterized mitochondrial protein AtMg00860; AltName: Full=ORF158;	SubName: Full=Uncharacterized protein {ECO:0000313|EMBL:KOM35206.1};	FOG: Transposon-encoded proteins with TYA, reverse transcriptase, integrase domains in various combinations	GO:0005739,mitochondrion	RNase H-like domain found in reverse transcriptase
gene-LOC110683670	0.17	0.51	0.44	0.02	0.04	0.06	8	24	21	1	2	3	0.097	-3.37	0.000318	0.00694636	down	NW_018743689.1	2187575	2194648	+	LOC110683670	--	--	--	--	--	--	--	--
gene-LOC110683690	0.7	0.56	1.54	0	0	0	32	25	69	0	0	0	0.004	-7.958	1.07255e-09	7.51912e-08	down	NW_018743691.1	4351536	4353819	-	LOC110683690	--	K01322 prolyl oligopeptidase [EC:3.4.21.26] | (RefSeq) putative F-box/LRR-repeat protein At3g18150 (A)	F-box/FBD/LRR-repeat protein At5g22660-like [Chenopodium quinoa]	RecName: Full=F-box/FBD/LRR-repeat protein At5g22660;	SubName: Full=Uncharacterized protein {ECO:0000313|EMBL:KNA11711.1};	--	--	FBD
gene-LOC110683709	0.35	0.03	0.81	0	0	0	11	1	25	0	0	0	0.015	-6.099	0.000677185	0.0131054	down	NW_018742263.1	1877142	1879104	+	LOC110683709	--	--	--	--	--	--	--	--
gene-LOC110683793	6.84	8.87	10.17	4.85	4.11	3.8	106	135	155	70	62	57	0.415	-1.268	2.67603e-05	0.000819537	down	NW_018743691.1	3683323	3684912	+	LOC110683793	--	--	--	--	--	--	--	--
gene-LOC110683801	3.71	3.71	5.82	0	0	0	380	373	586	0	0	0	0	-11.421	2.30742e-21	8.69671e-19	down	NW_018743691.1	3798707	3805658	-	LOC110683801	--	K07466 replication factor A1 | (RefSeq) uncharacterized protein LOC109229888 (A)	uncharacterized protein LOC110683801 [Chenopodium quinoa]	--	SubName: Full=Uncharacterized protein {ECO:0000313|EMBL:KNA06089.1}; Flags: Fragment;	--	--	Replication factor-A C terminal domain
gene-LOC110683802	2.03	1.71	4.03	0	0	0	120	99	234	0	0	0	0.001	-9.817	2.07239e-15	3.3147e-13	down	NW_018743691.1	3806244	3811416	-	LOC110683802	--	K15255 ATP-dependent DNA helicase PIF1 [EC:3.6.4.12] | (RefSeq) uncharacterized protein LOC107022360 (A)	uncharacterized protein LOC110683802 isoform X1 [Chenopodium quinoa]	--	SubName: Full=uncharacterized protein LOC108984871 {ECO:0000313|RefSeq:XP_018812501.1};	DNA helicase PIF1/RRM3	--	Helitron helicase-like domain at N-terminus
gene-LOC110683818	1.22	1.42	2.68	0	0.15	0	49	56	106	0	6	0	0.025	-5.347	1.77502e-10	1.4346e-08	down	NW_018743691.1	4039827	4041835	-	LOC110683818	--	--	F-box/FBD/LRR-repeat protein At1g16930-like [Chenopodium quinoa]	RecName: Full=F-box/FBD/LRR-repeat protein At1g16930;	SubName: Full=Uncharacterized protein {ECO:0000313|EMBL:KNA11711.1};	--	--	FBD
gene-LOC110683827	0.63	1.32	1.49	0	0	0	19	39	44	0	0	0	0.005	-7.733	7.39626e-09	4.51932e-07	down	NW_018743691.1	4344280	4346089	-	LOC110683827	--	--	putative FBD-associated F-box protein At1g78730 [Chenopodium quinoa]	RecName: Full=Putative FBD-associated F-box protein At1g78730;	SubName: Full=Uncharacterized protein {ECO:0000313|EMBL:KNA11712.1};	--	--	--
gene-LOC110683910	0.64	0.88	1.27	0.41	0.46	0.13	20	27	39	12	14	4	0.303	-1.72	0.00328473	0.0459537	down	NW_018743691.1	4069836	4071395	+	LOC110683910	--	--	FBD-associated F-box protein At2g26860-like [Chenopodium quinoa]	RecName: Full=FBD-associated F-box protein At2g26860;	SubName: Full=Uncharacterized protein {ECO:0000313|EMBL:KMS95810.1};	--	--	FBD
gene-LOC110683926	0.42	0.64	0.35	0	0	0	6	9	5	0	0	0	0.023	-5.447	0.00102211	0.0183446	down	NW_018743691.1	4633427	4634591	-	LOC110683926	--	K05349 beta-glucosidase [EC:3.2.1.21] | (RefSeq) probable beta-glucosidase F (A)	uncharacterized protein LOC110683926 [Chenopodium quinoa]	--	SubName: Full=Uncharacterized protein {ECO:0000313|EMBL:KNA22414.1};	--	--	--
gene-LOC110683938	0.15	0.73	0.06	0	0	0.04	7	34	3	0	0	2	0.035	-4.821	0.00309407	0.0439486	down	NW_018743693.1	7576	19927	-	LOC110683938	--	--	--	--	--	--	--	--
gene-LOC110684012	6.29	5.46	8.5	0.03	0.08	0.16	245	209	326	1	3	6	0.011	-6.468	5.69788e-35	7.74647e-32	down	NW_018742263.1	6372494	6376047	+	LOC110684012	--	--	--	--	--	--	--	--
gene-LOC110684174	2.21	1.53	3.03	0.83	0.97	0.69	63	43	85	22	27	19	0.316	-1.663	2.7661e-06	0.000107009	down	NW_018743697.1	2257715	2261720	+	LOC110684174	--	--	--	--	--	--	--	--
gene-LOC110684197	1.7	1.73	0.22	0.14	0.22	0.13	39	39	5	3	5	3	0.104	-3.269	0.000711715	0.0136626	down	NW_018743697.1	2437865	2440076	-	LOC110684197	--	K00799 glutathione S-transferase [EC:2.5.1.18] | (RefSeq) protein IN2-1 homolog B-like (A)	protein IN2-1 homolog B-like [Chenopodium quinoa]	RecName: Full=Protein IN2-1 homolog B; AltName: Full=Glutathione S-transferase GSTZ5;	SubName: Full=Uncharacterized protein {ECO:0000313|EMBL:KNA08771.1};	Glutathione S-transferase	GO:0005737,cytoplasm; GO:0004364,glutathione transferase activity; GO:0006749,glutathione metabolic process; GO:0010731,protein glutathionylation	Glutathione S-transferase, N-terminal domain
gene-LOC110684267	12.85	12.77	7.08	3.86	4.17	2.13	168	164	91	47	53	27	0.246	-2.023	1.77738e-05	0.000570484	down	NW_018742271.1	450360	451013	+	LOC110684267	--	K16465 centrin-1 | (RefSeq) calcium-binding protein PBP1-like (A)	calcium-binding protein PBP1-like [Chenopodium quinoa]	RecName: Full=Calcium-binding protein PBP1; AltName: Full=KIC-related protein 2; AltName: Full=PINOID-binding protein 1;	SubName: Full=Uncharacterized protein {ECO:0000313|EMBL:KMS98389.1};	Ca2+-binding protein (centrin/caltractin), EF-Hand superfamily protein	GO:0005509,calcium ion binding; GO:0009733,response to auxin	EF-hand domain pair
gene-LOC110684329	0.18	0.55	0.6	0.05	0.14	0	8	24	26	2	6	0	0.115	-3.125	0.00184122	0.0295487	down	NW_018743697.1	3794442	3798375	+	LOC110684329	--	--	--	--	--	--	--	--
gene-LOC110684350	3.8	2.31	5.09	0	0	0	266	159	350	0	0	0	0.001	-10.609	3.55969e-18	8.97396e-16	down	NW_018743697.1	4000926	4006221	+	LOC110684350	--	K02218 casein kinase 1 [EC:2.7.11.1] | (RefSeq) uncharacterized protein LOC8069780 (A)	putative nuclease HARBI1 isoform X1 [Chenopodium quinoa]	RecName: Full=Protein ALP1-like {ECO:0000305}; EC=3.1.-.-;	SubName: Full=Uncharacterized protein {ECO:0000313|EnsemblPlants:TRIAE_CS42_3DS_TGACv1_271976_AA0912150.1};	Predicted transposase	GO:0005634,nucleus; GO:0046872,metal ion binding; GO:0004518,nuclease activity	DDE superfamily endonuclease
gene-LOC110684712	5.8	4.77	6.7	0.05	0.1	0.14	125	101	142	1	2	3	0.014	-6.134	1.51806e-20	5.40074e-18	down	NW_018743742.1	415001	417536	+	LOC110684712	--	K00549 5-methyltetrahydropteroyltriglutamate--homocysteine methyltransferase [EC:2.1.1.14] | (RefSeq) 5-methyltetrahydropteroyltriglutamate--homocysteine methyltransferase (A)	uncharacterized protein LOC110684712 [Chenopodium quinoa]	RecName: Full=5-methyltetrahydropteroyltriglutamate--homocysteine methyltransferase; EC=2.1.1.14; AltName: Full=Cobalamin-independent methionine synthase isozyme; AltName: Full=Vitamin-B12-independent methionine synthase isozyme;	SubName: Full=Methionine synthase {ECO:0000313|EMBL:BAE07181.1};	Methionine synthase II (cobalamin-independent)	GO:0005737,cytoplasm; GO:0003871,5-methyltetrahydropteroyltriglutamate-homocysteine S-methyltransferase activity; GO:0008270,zinc ion binding; GO:0009086,methionine biosynthetic process	Cobalamin-independent synthase, Catalytic domain
gene-LOC110684714	0.73	0.43	0.95	0.32	0.32	0.34	47	27	60	19	20	21	0.401	-1.317	0.0011919	0.0207274	down	NW_018743742.1	518958	522381	+	LOC110684714	--	K13435 serine/threonine-protein kinase Pto | (RefSeq) receptor-like protein kinase HERK 1 (A)	probable receptor-like protein kinase At5g59700 [Chenopodium quinoa]	RecName: Full=Probable receptor-like protein kinase At5g59700; EC=2.7.11.-; Flags: Precursor;	SubName: Full=Uncharacterized protein {ECO:0000313|EMBL:KNA22421.1};	Serine/threonine protein kinase	GO:0016021,integral component of membrane; GO:0005886,plasma membrane; GO:0009506,plasmodesma; GO:0005524,ATP binding; GO:0004674,protein serine/threonine kinase activity	Protein tyrosine kinase
gene-LOC110684837	1.75	1.31	1.71	0.02	0.05	0.02	79	58	76	1	2	1	0.016	-5.943	2.42425e-13	2.96399e-11	down	NW_018743783.1	2554894	2576861	+	LOC110684837	--	K17675 ATP-dependent RNA helicase SUPV3L1/SUV3 [EC:3.6.4.13] | (RefSeq) DExH-box ATP-dependent RNA helicase DExH16, mitochondrial-like isoform X1 (A)	DExH-box ATP-dependent RNA helicase DExH16, mitochondrial-like isoform X1 [Chenopodium quinoa]	RecName: Full=DExH-box ATP-dependent RNA helicase DExH16, mitochondrial {ECO:0000305}; EC=3.6.4.13 {ECO:0000269|PubMed:10570936}; AltName: Full=ATP-dependent RNA helicase SUV3 {ECO:0000303|PubMed:10570936}; Short=AtSUV3 {ECO:0000303|PubMed:10570936}; AltName: Full=Protein EMBRYO SAC DEVELOPMENT ARREST 15 {ECO:0000303|PubMed:15634699}; AltName: Full=Protein POLLEN DEVELOPMENT DEFECTIVE 17 {ECO:000…	SubName: Full=Uncharacterized protein {ECO:0000313|EMBL:KNA22974.1};	Mitochondrial RNA helicase SUV3, DEAD-box superfamily	GO:0045025,mitochondrial degradosome; GO:0042645,mitochondrial nucleoid; GO:0005739,mitochondrion; GO:0005634,nucleus; GO:0005524,ATP binding; GO:0004004,ATP-dependent RNA helicase activity; GO:0003723,RNA binding; GO:0009561,megagametogenesis; GO:0000965,mitochondrial RNA 3'-end processing; GO:0009555,pollen development; GO:0006401,RNA catabolic process; GO:0016070,RNA metabolic process	Mitochondrial degradasome RNA helicase subunit C terminal
gene-LOC110684918	5.77	6.8	7.28	0	0	0	203	235	252	0	0	0	0.001	-10.502	7.18368e-18	1.68405e-15	down	NW_018743787.1	1927821	1930605	+	LOC110684918	--	--	--	--	--	--	--	--
gene-LOC110684959	5.32	4.19	7.18	1.6	1.92	1.52	339	262	450	95	119	94	0.259	-1.951	7.63213e-23	3.50039e-20	down	NW_018743791.1	8423	28932	-	LOC110684959	--	K02154 V-type H+-transporting ATPase subunit a | (RefSeq) V-type proton ATPase subunit a1-like isoform X1 (A)	V-type proton ATPase subunit a1-like isoform X1 [Chenopodium quinoa]	RecName: Full=V-type proton ATPase subunit a1; Short=V-ATPase subunit a1; AltName: Full=V-type proton ATPase 95 kDa subunit a isoform 1; Short=V-ATPase 95 kDa isoform a1; AltName: Full=Vacuolar H(+)-ATPase subunit a isoform 1; AltName: Full=Vacuolar proton pump subunit a1; AltName: Full=Vacuolar proton translocating ATPase 95 kDa subunit a isoform 1;	RecName: Full=V-type proton ATPase subunit a {ECO:0000256|RuleBase:RU361189};	Vacuolar H+-ATPase V0 sector, subunit a	GO:0005768,endosome; GO:0005794,Golgi apparatus; GO:0016021,integral component of membrane; GO:0000325,plant-type vacuole; GO:0005802,trans-Golgi network; GO:0012510,trans-Golgi network transport vesicle membrane; GO:0016471,vacuolar proton-transporting V-type ATPase complex; GO:0000220,vacuolar proton-transporting V-type ATPase, V0 domain; GO:0005773,vacuole; GO:0051117,ATPase binding; GO:004696…	V-type ATPase 116kDa subunit family
gene-LOC110685022	13.37	67.61	1.8	0.51	0.12	1.95	226	1123	30	8	2	32	0.024	-5.396	0.000676971	0.0131054	down	NW_018743791.1	731573	732418	+	LOC110685022	--	K13449 pathogenesis-related protein 1 | (RefSeq) pathogenesis-related protein PR-1 type-like (A)	pathogenesis-related protein PR-1 type-like [Chenopodium quinoa]	RecName: Full=Pathogenesis-related protein PR-1 type; Flags: Precursor;	SubName: Full=Uncharacterized protein {ECO:0000313|EMBL:KNA21092.1};	Defense-related protein containing SCP domain	GO:0005576,extracellular region; GO:0006952,defense response; GO:0009607,response to biotic stimulus	Cysteine-rich secretory protein family
gene-LOC110685024	0.58	1.72	0.1	0	0	0.05	12	35	2	0	0	1	0.017	-5.906	0.000527234	0.010653	down	NW_018743791.1	737599	738637	-	LOC110685024	--	K13449 pathogenesis-related protein 1 | (RefSeq) pathogenesis-related protein PRB1-3-like (A)	pathogenesis-related protein PRB1-3-like [Chenopodium quinoa]	RecName: Full=Pathogenesis-related protein 1; Flags: Precursor;	SubName: Full=Pathogenesis-related protein 1a {ECO:0000313|EMBL:AFR90191.1};	Defense-related protein containing SCP domain	GO:0005576,extracellular region; GO:0006952,defense response; GO:0009607,response to biotic stimulus	Cysteine-rich secretory protein family
gene-LOC110685040	11.95	12.01	13.16	6.09	6.69	7.07	468	462	507	222	255	268	0.448	-1.159	4.46493e-07	1.9996e-05	down	NW_018743791.1	893620	896583	-	LOC110685040	--	K03100 signal peptidase I [EC:3.4.21.89] | (RefSeq) uncharacterized protein LOC18104955 (A)	uncharacterized protein LOC110685040 [Chenopodium quinoa]	--	SubName: Full=Uncharacterized protein {ECO:0000313|EMBL:KNA11138.1};	--	--	--
gene-LOC110685214	12.14	11.17	7.74	5.15	6.17	6.57	271	245	170	107	134	142	0.468	-1.095	0.00306586	0.0436292	down	NW_018743792.1	4294347	4327719	+	LOC110685214	--	K23336 armadillo repeat-containing protein 8 | (RefSeq) hypothetical protein (A)	uncharacterized protein LOC110685214 [Chenopodium quinoa]	--	SubName: Full=Uncharacterized protein {ECO:0000313|EMBL:KNA20432.1};	--	GO:0016021,integral component of membrane	CPBP intramembrane metalloprotease
gene-LOC110685227	4.52	4.47	4.92	2.94	3.52	1.79	99	96	106	60	75	38	0.491	-1.027	0.00177652	0.0287529	down	NW_018743792.1	5716962	5720366	-	LOC110685227	--	--	--	--	--	--	--	--
gene-LOC110685240	3.2	1.81	2.99	0	0	0	214	119	197	0	0	0	0.001	-10.091	2.13964e-16	3.86018e-14	down	NW_018743792.1	8130637	8134765	+	LOC110685240	--	--	--	--	--	--	--	--
gene-LOC110685485	0.45	0.55	0.27	0.09	0.04	0.09	26	31	15	5	2	5	0.14	-2.838	0.000243337	0.00548763	down	NW_018743814.1	975632	988158	+	LOC110685485	--	K14494 DELLA protein | (RefSeq) uncharacterized protein LOC18106830 (A)	protein NLP6-like [Chenopodium quinoa]	RecName: Full=Protein NLP6; Short=AtNLP6; AltName: Full=NIN-like protein 6; AltName: Full=Nodule inception protein-like protein 6;	SubName: Full=Uncharacterized protein {ECO:0000313|EMBL:KNA07705.1};	--	GO:0005634,nucleus; GO:0003677,DNA binding; GO:0003700,DNA-binding transcription factor activity; GO:0006351,transcription, DNA-templated	RWP-RK domain
gene-LOC110685539	0.35	0.98	0.59	0.16	0.22	0.19	23	63	38	10	14	12	0.24	-2.06	0.000704948	0.0135669	down	NW_018743828.1	970837	974537	-	LOC110685539	--	K08176 MFS transporter, PHS family, inorganic phosphate transporter | (RefSeq) probable inorganic phosphate transporter 1-8 (A)	probable inorganic phosphate transporter 1-8 [Chenopodium quinoa]	RecName: Full=Probable inorganic phosphate transporter 1-9; Short=AtPht1;9; AltName: Full=H(+)/Pi cotransporter;	SubName: Full=Uncharacterized protein {ECO:0000313|EMBL:KNA17198.1};	Inorganic phosphate transporter	GO:0005887,integral component of plasma membrane; GO:0005886,plasma membrane; GO:0015415,ATPase-coupled phosphate ion transmembrane transporter activity; GO:0015114,phosphate ion transmembrane transporter activity; GO:0015293,symporter activity; GO:1901684,arsenate ion transmembrane transport; GO:0006817,phosphate ion transport	Sugar (and other) transporter
gene-LOC110685629	2.53	1.78	2.48	0.25	0.28	0	55	38	53	5	6	0	0.065	-3.948	2.59918e-09	1.71776e-07	down	NW_018743850.1	4245292	4247020	-	LOC110685629	--	--	--	--	--	--	--	--
gene-LOC110685733	0.13	0.09	0.41	0	0	0	6	4	18	0	0	0	0.019	-5.745	0.000419114	0.00876136	down	NW_018743850.1	7258444	7261420	-	LOC110685733	--	K17604 zinc finger SWIM domain-containing protein 3 | (RefSeq) protein FAR1-RELATED SEQUENCE 5-like (A)	PKS-NRPS hybrid synthetase CHGG_01239-like [Chenopodium quinoa]	RecName: Full=Protein FAR1-RELATED SEQUENCE 5;	SubName: Full=Uncharacterized protein {ECO:0000313|EMBL:OMO51093.1};	--	GO:0005634,nucleus; GO:0008270,zinc ion binding; GO:0006355,regulation of transcription, DNA-templated	MULE transposase domain
gene-LOC110685742	3	2.41	3.46	0.64	0.94	0.33	95	75	108	19	29	10	0.18	-2.476	3.93337e-10	3.02488e-08	down	NW_018743850.1	13124	14926	+	LOC110685742	--	K17710 pentatricopeptide repeat domain-containing protein 1 | (RefSeq) pentatricopeptide repeat-containing protein At2g18940, chloroplastic (A)	pentatricopeptide repeat-containing protein At5g67570, chloroplastic-like [Chenopodium quinoa]	RecName: Full=Pentatricopeptide repeat-containing protein At5g67570, chloroplastic; AltName: Full=Protein DELAYED GREENING 1; AltName: Full=Protein EMBRYO DEFECTIVE 1408; Flags: Precursor;	SubName: Full=Uncharacterized protein {ECO:0000313|EMBL:KNA08688.1};	FOG: PPR repeat	GO:0009507,chloroplast; GO:0004519,endonuclease activity; GO:0003723,RNA binding; GO:0009658,chloroplast organization; GO:0009451,RNA modification; GO:0042793,plastid transcription	PPR repeat family
gene-LOC110685804	2.89	8.29	0.34	0	0	0	70	197	8	0	0	0	0.002	-9.37	3.27355e-05	0.000976473	down	NW_018743850.1	650502	656017	-	LOC110685804	--	K15397 3-ketoacyl-CoA synthase [EC:2.3.1.199] | (RefSeq) 3-ketoacyl-CoA synthase 17-like (A)	protein RADIALIS-like 3 [Chenopodium quinoa]	RecName: Full=Transcription factor RADIALIS;	SubName: Full=Uncharacterized protein {ECO:0000313|EMBL:KNA12251.1};	Zuotin and related molecular chaperones (DnaJ superfamily), contains DNA-binding domains	GO:0005634,nucleus; GO:0003677,DNA binding; GO:0048262,determination of dorsal/ventral asymmetry; GO:0009908,flower development; GO:0006355,regulation of transcription, DNA-templated; GO:0006351,transcription, DNA-templated	Myb-like DNA-binding domain
gene-LOC110685850	6.71	1.98	2.13	0.58	0.74	0.63	186	54	58	15	20	17	0.148	-2.755	5.92416e-06	0.000213152	down	NW_018743850.1	1065348	1067710	+	LOC110685850	--	K00430 peroxidase [EC:1.11.1.7] | (RefSeq) peroxidase 72-like (A)	peroxidase 72-like [Chenopodium quinoa]	RecName: Full=Peroxidase 72; Short=Atperox P72; EC=1.11.1.7; AltName: Full=ATP6a; AltName: Full=PRXR8; Flags: Precursor;	RecName: Full=Peroxidase {ECO:0000256|RuleBase:RU362060, ECO:0000256|SAAS:SAAS00709852}; EC=1.11.1.7 {ECO:0000256|RuleBase:RU362060, ECO:0000256|SAAS:SAAS00709852};	--	GO:0005576,extracellular region; GO:0020037,heme binding; GO:0046872,metal ion binding; GO:0004601,peroxidase activity; GO:0042744,hydrogen peroxide catabolic process; GO:0009809,lignin biosynthetic process; GO:0006979,response to oxidative stress	Peroxidase
gene-LOC110685871	4.39	4.05	5.46	0.33	0.85	0.75	85	77	104	6	16	14	0.117	-3.092	5.34272e-14	6.96511e-12	down	NW_018743850.1	1219711	1221592	-	LOC110685871	--	K03676 glutaredoxin 3 | (RefSeq) glutaredoxin-C3-like (A)	glutaredoxin-C3-like [Chenopodium quinoa]	RecName: Full=Glutaredoxin-C3; Short=AtGrxC3;	SubName: Full=Uncharacterized protein {ECO:0000313|EMBL:KNA13331.1};	Glutaredoxin and related proteins	GO:0005794,Golgi apparatus; GO:0009055,electron transfer activity; GO:0015035,protein disulfide oxidoreductase activity; GO:0045454,cell redox homeostasis	Glutaredoxin
gene-LOC110685895	0.37	0.33	0.71	0.13	0.12	0.15	39	34	74	13	12	15	0.247	-2.02	6.08609e-06	0.00021816	down	NW_018743850.1	1589434	1595884	-	LOC110685895	--	K16302 metal transporter CNNM | (RefSeq) probable methyltransferase PMT28 (A)	probable methyltransferase PMT27 [Chenopodium quinoa]	RecName: Full=Probable methyltransferase PMT27; EC=2.1.1.-;	SubName: Full=Uncharacterized protein {ECO:0000313|EMBL:KNA13332.1};	--	GO:0005737,cytoplasm; GO:0005789,endoplasmic reticulum membrane; GO:0016021,integral component of membrane; GO:0008757,S-adenosylmethionine-dependent methyltransferase activity; GO:0032259,methylation	Putative S-adenosyl-L-methionine-dependent methyltransferase
gene-LOC110685950	0.3	0.73	0.42	0.04	0	0.08	8	19	11	1	0	2	0.067	-3.902	0.00104274	0.0186182	down	NW_018743850.1	2859693	2861325	-	LOC110685950	--	K03283 heat shock 70kDa protein 1/2/6/8 | (RefSeq) heat shock 70 kDa protein 18-like isoform X1 (A)	probable mediator of RNA polymerase II transcription subunit 37c [Chenopodium quinoa]	RecName: Full=Probable mediator of RNA polymerase II transcription subunit 37c; AltName: Full=Heat shock 70 kDa protein 4; AltName: Full=Heat shock cognate 70 kDa protein 4; AltName: Full=Heat shock cognate protein 70-4; Short=AtHsc70-4; AltName: Full=Heat shock protein 70-4; Short=AtHsp70-4;	SubName: Full=Uncharacterized protein {ECO:0000313|EMBL:KZM85565.1};	Molecular chaperones HSP70/HSC70, HSP70 superfamily	GO:0048046,apoplast; GO:0005618,cell wall; GO:0005829,cytosol; GO:0005794,Golgi apparatus; GO:0005739,mitochondrion; GO:0005634,nucleus; GO:0005886,plasma membrane; GO:0005774,vacuolar membrane; GO:0005524,ATP binding; GO:0031625,ubiquitin protein ligase binding; GO:0016567,protein ubiquitination; GO:0006355,regulation of transcription, DNA-templated; GO:0009617,response to bacterium; GO:0046686,…	Hsp70 protein
gene-LOC110685991	1.27	3.18	2.31	0.87	0.83	0.56	33	81	59	21	21	14	0.271	-1.882	0.000426277	0.00887696	down	NW_018743850.1	3691259	3692555	-	LOC110685991	--	--	--	--	--	--	--	--
gene-LOC110686003	6.78	10.28	2.21	1.08	0.83	0.69	243	362	78	36	29	24	0.103	-3.274	3.58661e-07	1.62925e-05	down	NW_018743850.1	3845717	3847614	-	LOC110686003	--	K00993 ethanolaminephosphotransferase [EC:2.7.8.1] | (RefSeq) uncharacterized protein LOC106453259 (A)	uncharacterized protein LOC110686003 [Chenopodium quinoa]	--	SubName: Full=Uncharacterized protein {ECO:0000313|EMBL:KNA03271.1};	--	--	Protein of unknown function (DUF1262)
gene-LOC110686166	44.38	59.07	73.94	17.78	19.24	22.09	1294	1692	2121	483	546	624	0.284	-1.818	1.52854e-12	1.69148e-10	down	NW_018743850.1	6973887	6975945	-	LOC110686166	--	K08235 xyloglucan:xyloglucosyl transferase [EC:2.4.1.207] | (RefSeq) probable xyloglucan endotransglucosylase/hydrolase protein 6 (A)	probable xyloglucan endotransglucosylase/hydrolase protein 6 [Chenopodium quinoa]	RecName: Full=Probable xyloglucan endotransglucosylase/hydrolase protein 7; Short=At-XTH7; Short=XTH-7; EC=2.4.1.207; Flags: Precursor;	RecName: Full=Xyloglucan endotransglucosylase/hydrolase {ECO:0000256|RuleBase:RU361120}; EC=2.4.1.207 {ECO:0000256|RuleBase:RU361120};	--	GO:0048046,apoplast; GO:0005618,cell wall; GO:0004553,hydrolase activity, hydrolyzing O-glycosyl compounds; GO:0016762,xyloglucan:xyloglucosyl transferase activity; GO:0042546,cell wall biogenesis; GO:0071555,cell wall organization; GO:0010411,xyloglucan metabolic process	Glycosyl hydrolases family 16
gene-LOC110686207	29.55	33.25	25.93	14.72	17.58	4.91	901	996	778	418	522	145	0.334	-1.583	0.000628138	0.0123254	down	NW_018742292.1	1209895	1217464	+	LOC110686207	--	K02116 ATP synthase protein I | (RefSeq) uncharacterized protein LOC110686207 (A)	uncharacterized protein LOC110686207 [Chenopodium quinoa]	--	SubName: Full=Uncharacterized protein {ECO:0000313|EMBL:KMS99284.1};	--	GO:0009534,chloroplast thylakoid; GO:0016021,integral component of membrane; GO:0033614,chloroplast proton-transporting ATP synthase complex assembly	--
gene-LOC110686223	27.56	26.13	18.91	11.23	12.64	9.05	569	530	384	216	254	181	0.366	-1.45	1.44418e-05	0.00047722	down	NW_018743850.1	7736886	7737918	+	LOC110686223	--	K13448 calcium-binding protein CML | (RefSeq) probable calcium-binding protein CML41 (A)	probable calcium-binding protein CML41 [Chenopodium quinoa]	RecName: Full=Probable calcium-binding protein CML41; AltName: Full=Calmodulin-like protein 41;	SubName: Full=Uncharacterized protein {ECO:0000313|EMBL:KNA05311.1}; Flags: Fragment;	Calmodulin and related proteins (EF-Hand superfamily)	GO:0005509,calcium ion binding	EF-hand domain pair
gene-LOC110686229	2.06	2.24	2.48	0.75	1.01	1.02	44	47	52	15	21	21	0.344	-1.538	0.000104426	0.00266076	down	NW_018742292.1	1280709	1281956	+	LOC110686229	--	--	--	--	--	--	--	--
gene-LOC110686376	10.84	10.33	9.96	0	0	0	283	265	256	0	0	0	0.001	-10.735	1.69989e-18	4.55701e-16	down	NW_018743858.1	1109949	1117228	-	LOC110686376	--	K22522 cytokinin riboside 5'-monophosphate phosphoribohydrolase [EC:3.2.2.-] | (RefSeq) probable cytokinin riboside 5'-monophosphate phosphoribohydrolase LOGL10 isoform X1 (A)	probable cytokinin riboside 5'-monophosphate phosphoribohydrolase LOGL10 isoform X1 [Chenopodium quinoa]	RecName: Full=Cytokinin riboside 5'-monophosphate phosphoribohydrolase LOG7; EC=3.2.2.n1; AltName: Full=Protein LONELY GUY 7;	RecName: Full=Cytokinin riboside 5'-monophosphate phosphoribohydrolase {ECO:0000256|RuleBase:RU363015}; EC=3.2.2.n1 {ECO:0000256|RuleBase:RU363015};	--	GO:0005829,cytosol; GO:0005634,nucleus; GO:0016787,hydrolase activity; GO:0009691,cytokinin biosynthetic process	Possible lysine decarboxylase
gene-LOC110686411	0.88	1.35	0.82	0.26	0.08	0.08	22	33	20	6	2	2	0.112	-3.153	6.2787e-05	0.00172571	down	NW_018742292.1	2394682	2397362	-	LOC110686411	--	K20855 beta-1,3-galactosyltransferase 1/2/3/4/5/7/8 [EC:2.4.1.-] | (RefSeq) beta-1,3-galactosyltransferase 7-like (A)	beta-1,3-galactosyltransferase 7-like [Chenopodium quinoa]	RecName: Full=Probable beta-1,3-galactosyltransferase 4; EC=2.4.1.-;	RecName: Full=Hexosyltransferase {ECO:0000256|RuleBase:RU363063}; EC=2.4.1.- {ECO:0000256|RuleBase:RU363063};	Galactosyltransferases	GO:0000139,Golgi membrane; GO:0016021,integral component of membrane; GO:0008378,galactosyltransferase activity; GO:0006486,protein glycosylation	Galactosyltransferase
gene-LOC110686613	0.35	0.77	1.78	0	0	0	6	13	30	0	0	0	0.01	-6.591	1.21115e-05	0.000409095	down	NW_018742292.1	1129454	1130762	+	LOC110686613	--	K17086 transmembrane 9 superfamily member 2/4 | (RefSeq) uncharacterized LOC101300290 (A)	uncharacterized protein LOC110686613 [Chenopodium quinoa]	--	SubName: Full=Uncharacterized protein {ECO:0000313|EMBL:KNA10075.1}; Flags: Fragment;	--	GO:0003677,DNA binding; GO:0004803,transposase activity; GO:0006313,transposition, DNA-mediated	MULE transposase domain
gene-LOC110686616	0.42	0.33	0.66	0.08	0.03	0	17	13	26	3	1	0	0.064	-3.963	4.87428e-05	0.00138573	down	NW_018743893.1	1042903	1047596	-	LOC110686616	--	--	--	--	--	--	--	--
gene-LOC110686627	15	22.44	10.29	7.46	8.78	8.79	486	714	328	225	277	276	0.415	-1.269	0.00362072	0.0496327	down	NW_018743893.1	60438	67154	-	LOC110686627	--	K06195 ApaG protein | (RefSeq) uncharacterized protein LOC109816810 isoform X1 (A)	uncharacterized protein LOC110686627 [Chenopodium quinoa]	RecName: Full=F-box protein SKIP16; AltName: Full=SKP1-interacting partner 16;	SubName: Full=Uncharacterized protein {ECO:0000313|EMBL:KNA25754.1};	Putative Mg2+ and Co2+ transporter CorD	GO:0019005,SCF ubiquitin ligase complex; GO:0016567,protein ubiquitination	ApaG domain
gene-LOC110686737	43.46	32.62	49.46	17.5	23.05	22.2	792	584	887	297	409	392	0.425	-1.234	6.6983e-10	4.90605e-08	down	NW_018743893.1	296882	297793	+	LOC110686737	--	--	uncharacterized protein LOC110686737 [Chenopodium quinoa]	--	SubName: Full=Uncharacterized protein {ECO:0000313|EMBL:KNA25044.1};	--	--	Protein of unknown function (DUF1645)
gene-LOC110686743	2.24	1.76	5.68	0.1	0.07	0.05	101	78	252	4	3	2	0.019	-5.687	3.46107e-18	8.81506e-16	down	NW_018743893.1	486220	491760	+	LOC110686743	--	--	--	--	--	--	--	--
gene-LOC110686772	6.72	5.2	12.45	0	0	0	129	98	235	0	0	0	0.001	-9.846	1.52208e-15	2.48673e-13	down	NW_018743893.1	1157860	1159004	-	LOC110686772	--	K22696 protein-lysine N-methyltransferase EEF2KMT [EC:2.1.1.-] | (RefSeq) uncharacterized protein LOC108202480 isoform X1 (A)	uncharacterized protein LOC110686772 [Chenopodium quinoa]	--	SubName: Full=Mariner transposase {ECO:0000313|EMBL:AFK13835.1};	--	--	Transposase
gene-LOC110686834	1.59	1.44	1.88	0.51	0.79	0.77	107	95	124	32	52	50	0.357	-1.486	7.93745e-07	3.39882e-05	down	NW_018743894.1	1994371	2006908	+	LOC110686834	--	--	uncharacterized protein LOC110686834 isoform X1 [Chenopodium quinoa]	--	SubName: Full=Uncharacterized protein {ECO:0000313|EMBL:GAV72178.1};	--	GO:0016021,integral component of membrane	--
gene-LOC110686840	1.05	0.83	1.6	0	0	0	18	14	27	0	0	0	0.008	-6.902	3.18239e-07	1.46486e-05	down	NW_018743894.1	3053054	3058433	+	LOC110686840	--	--	--	--	--	--	--	--
gene-LOC110686859	3.55	4.45	3.03	1.91	1.24	0.39	56	69	47	28	19	6	0.258	-1.957	0.0013327	0.0227083	down	NW_018743894.1	4867854	4870001	-	LOC110686859	--	--	uncharacterized protein LOC110686859 [Chenopodium quinoa]	--	SubName: Full=Uncharacterized protein {ECO:0000313|EMBL:KNA06477.1}; Flags: Fragment;	--	--	--
gene-LOC110686953	2.22	1.79	3.51	0	0	0	34	27	53	0	0	0	0.004	-7.85	8.37573e-10	6.0272e-08	down	NW_018743906.1	1670972	1672471	+	LOC110686953	--	--	--	--	--	--	--	--
gene-LOC110686966	94.05	63.69	71.81	0	0	0	2026	1348	1522	0	0	0	0	-13.332	8.42768e-28	6.54728e-25	down	NW_018743906.1	2010501	2011578	+	LOC110686966	--	K09286 EREBP-like factor | (RefSeq) ethylene-responsive transcription factor 11-like (A)	ethylene-responsive transcription factor 11-like [Chenopodium quinoa]	RecName: Full=Ethylene-responsive transcription factor 8; Short=AtERF8; AltName: Full=Ethylene-responsive element-binding factor 8; Short=EREBP-8;	SubName: Full=Uncharacterized protein {ECO:0000313|EMBL:KNA16822.1};	--	GO:0005634,nucleus; GO:0003677,DNA binding; GO:0003700,DNA-binding transcription factor activity; GO:0009873,ethylene-activated signaling pathway; GO:0006351,transcription, DNA-templated	AP2 domain
gene-LOC110686969	62.24	124.25	35.16	16.96	8.23	23.91	1056	2071	587	268	136	393	0.176	-2.509	7.88282e-05	0.00208097	down	NW_018743906.1	2050869	2053592	+	LOC110686969	--	--	protein PLANT CADMIUM RESISTANCE 2-like [Chenopodium quinoa]	RecName: Full=Protein PLANT CADMIUM RESISTANCE 2; Short=AtPCR2;	SubName: Full=Uncharacterized protein {ECO:0000313|EMBL:KNA19790.1};	--	GO:0016021,integral component of membrane; GO:0005886,plasma membrane; GO:0006979,response to oxidative stress	PLAC8 family
gene-LOC110687098	1.54	0.84	2.56	0	0	0	30	16	49	0	0	0	0.005	-7.554	1.37181e-08	8.07119e-07	down	NW_018743919.1	3566536	3567890	+	LOC110687098	--	--	--	--	--	--	--	--
gene-LOC110687103	4.63	3.78	6.42	0.53	0.47	2.01	121	97	165	13	12	51	0.182	-2.461	5.1599e-05	0.0014593	down	NW_018743919.1	3867631	3868938	+	LOC110687103	--	K22312 hydroxyjasmonate sulfotransferase [EC:2.8.2.39] | (RefSeq) cytosolic sulfotransferase 5-like (A)	cytosolic sulfotransferase 5-like [Chenopodium quinoa]	RecName: Full=Cytosolic sulfotransferase 5; Short=AtSOT5; EC=2.8.2.-; AltName: Full=Flavonoid 7-sulfotransferase 3a; Short=AtST3a;	RecName: Full=Sulfotransferase {ECO:0000256|RuleBase:RU361155}; EC=2.8.2.- {ECO:0000256|RuleBase:RU361155};	Sulfotransferase	GO:0005737,cytoplasm; GO:1990135,flavonoid sulfotransferase activity; GO:0008146,sulfotransferase activity; GO:0009812,flavonoid metabolic process	Sulfotransferase domain
gene-LOC110687161	4.51	2.52	4.58	0	0	0	40	22	40	0	0	0	0.005	-7.706	2.79144e-09	1.82486e-07	down	NW_018743919.1	1388574	1389921	+	LOC110687161	--	K01183 chitinase [EC:3.2.1.14] | (RefSeq) chitinase-3-like protein 2 (A)	putative cysteine-rich receptor-like protein kinase 35 [Chenopodium quinoa]	RecName: Full=Putative cysteine-rich receptor-like protein kinase 35; Short=Cysteine-rich RLK35; EC=2.7.11.-; Flags: Precursor;	SubName: Full=Uncharacterized protein {ECO:0000313|EMBL:CCB54970.1};	--	GO:0016021,integral component of membrane; GO:0005886,plasma membrane; GO:0005524,ATP binding; GO:0004674,protein serine/threonine kinase activity; GO:0042742,defense response to bacterium; GO:0006468,protein phosphorylation	--
gene-LOC110687162	0.22	0.27	0.27	0.03	0.07	0.02	9	11	11	1	3	1	0.137	-2.873	0.00322998	0.0454079	down	NW_018743919.1	1395844	1398760	-	LOC110687162	--	--	--	--	--	--	--	--
gene-LOC110687182	0.64	0.8	1.75	0.08	0	0	9	11	24	1	0	0	0.022	-5.494	9.90114e-05	0.00254667	down	NW_018743919.1	1822234	1826346	-	LOC110687182	--	K06883 uncharacterized protein | (RefSeq) LOW QUALITY PROTEIN: uncharacterized protein LOC104799061 (A)	cysteine-rich receptor-like protein kinase 24 [Chenopodium quinoa]	RecName: Full=G-type lectin S-receptor-like serine/threonine-protein kinase At4g03230; EC=2.7.11.1; Flags: Precursor;	SubName: Full=Cysteine-rich receptor-like protein kinase 25 {ECO:0000313|EMBL:EXB97657.1};	--	GO:0016021,integral component of membrane; GO:0005886,plasma membrane; GO:0005524,ATP binding; GO:0005516,calmodulin binding; GO:0030246,carbohydrate binding; GO:0004674,protein serine/threonine kinase activity; GO:0006468,protein phosphorylation; GO:0048544,recognition of pollen	Protein tyrosine kinase
gene-LOC110687256	1.57	2.13	0.87	0.32	0.36	0.43	53	71	29	10	12	14	0.192	-2.379	8.0791e-05	0.00212248	down	NW_018743919.1	929185	930878	+	LOC110687256	--	K10260 F-box and WD-40 domain protein 7 | (RefSeq) WD40/YVTN repeat-like-containing domain (A)	U-box domain-containing protein 20-like [Chenopodium quinoa]	RecName: Full=U-box domain-containing protein 20; EC=2.3.2.27; AltName: Full=Plant U-box protein 20; AltName: Full=RING-type E3 ubiquitin transferase PUB20 {ECO:0000305};	RecName: Full=RING-type E3 ubiquitin transferase {ECO:0000256|SAAS:SAAS00702733}; EC=2.3.2.27 {ECO:0000256|SAAS:SAAS00702733};	--	GO:0004842,ubiquitin-protein transferase activity; GO:0010200,response to chitin	U-box domain
gene-LOC110687280	5.85	2.76	6.66	1.93	2.84	2.36	597	277	669	183	282	233	0.404	-1.308	1.52738e-05	0.000500369	down	NW_018743919.1	1345782	1368242	+	LOC110687280	--	K20606 mitogen-activated protein kinase kinase kinase ANP1 [EC:2.7.11.25] | (RefSeq) receptor-like serine/threonine-protein kinase SD1-7 isoform X1 (A)	putative receptor-like protein kinase At4g00960 isoform X2 [Chenopodium quinoa]	RecName: Full=Cysteine-rich receptor-like protein kinase 10; Short=Cysteine-rich RLK10; EC=2.7.11.-; AltName: Full=Receptor-like protein kinase 4; Flags: Precursor;	SubName: Full=Uncharacterized protein {ECO:0000313|EMBL:ESW15154.1};	--	GO:0016021,integral component of membrane; GO:0005886,plasma membrane; GO:0005524,ATP binding; GO:0004674,protein serine/threonine kinase activity; GO:0042742,defense response to bacterium; GO:0006468,protein phosphorylation	Protein kinase domain
gene-LOC110687295	0.97	2.83	0.49	0.04	0.04	0.04	24	69	12	1	1	1	0.022	-5.494	4.14254e-06	0.000154602	down	NW_018743919.1	1477851	1480072	+	LOC110687295	--	--	cysteine-rich receptor-like protein kinase 15 [Chenopodium quinoa]	RecName: Full=Cysteine-rich receptor-like protein kinase 8; Short=Cysteine-rich RLK8; EC=2.7.11.-; Flags: Precursor;	SubName: Full=cysteine-rich receptor-like protein kinase 25 {ECO:0000313|RefSeq:XP_016681094.1};	--	GO:0016021,integral component of membrane; GO:0005886,plasma membrane; GO:0005524,ATP binding; GO:0004674,protein serine/threonine kinase activity; GO:0042742,defense response to bacterium; GO:0006468,protein phosphorylation	Salt stress response/antifungal
gene-LOC110687300	33.31	37.79	36.12	1.36	0.28	0.17	1844	2055	1967	70	15	9	0.014	-6.149	5.61455e-20	1.92549e-17	down	NW_018743919.1	1830377	1834642	-	LOC110687300	--	K06883 uncharacterized protein | (RefSeq) LOW QUALITY PROTEIN: uncharacterized protein LOC104799061 (A)	cysteine-rich receptor-like protein kinase 25 [Chenopodium quinoa]	RecName: Full=Cysteine-rich receptor-like protein kinase 25; Short=Cysteine-rich RLK25; EC=2.7.11.-; Flags: Precursor;	SubName: Full=Uncharacterized protein {ECO:0000313|EMBL:KDO37422.1};	--	GO:0016021,integral component of membrane; GO:0005886,plasma membrane; GO:0005524,ATP binding; GO:0004674,protein serine/threonine kinase activity; GO:0042742,defense response to bacterium; GO:0006468,protein phosphorylation	Protein tyrosine kinase
gene-LOC110687318	2.7	5.62	3.1	1.11	1.3	1.2	139	284	157	53	65	60	0.252	-1.988	1.18943e-05	0.000402829	down	NW_018743919.1	1960324	1967407	-	LOC110687318	--	K20890 xylan alpha-glucuronosyltransferase [EC:2.4.1.-] | (RefSeq) UDP-glucuronate:xylan alpha-glucuronosyltransferase 1-like (A)	ankyrin repeat-containing protein ITN1-like [Chenopodium quinoa]	RecName: Full=Ankyrin repeat-containing protein ITN1; AltName: Full=Protein INCREASED TOLERANCE TO NACL {ECO:0000303|PubMed:18643991};	SubName: Full=Uncharacterized protein {ECO:0000313|EMBL:KMS96652.1};	FOG: Ankyrin repeat	GO:0016021,integral component of membrane; GO:0005634,nucleus; GO:0005886,plasma membrane; GO:0034613,cellular protein localization; GO:0009651,response to salt stress; GO:0007165,signal transduction	Domain of unknown function
gene-LOC110687322	0.52	1.45	0.8	0.03	0.16	0.13	17	47	26	1	5	4	0.09	-3.469	2.82037e-05	0.000854925	down	NW_018743919.1	2001457	2004376	+	LOC110687322	--	K02183 calmodulin | (RefSeq) calmodulin-like (A)	uncharacterized protein LOC110687322 [Chenopodium quinoa]	RecName: Full=Calmodulin; Short=CaM;	SubName: Full=Uncharacterized protein {ECO:0000313|EMBL:KNA15067.1};	Calmodulin and related proteins (EF-Hand superfamily)	GO:0005737,cytoplasm; GO:0005509,calcium ion binding; GO:0019904,protein domain specific binding	EF-hand domain pair
gene-LOC110687694	12.67	16.11	10.56	8.08	7.68	6.83	461	576	378	274	272	241	0.464	-1.107	0.00144902	0.0242461	down	NW_018743920.1	2691224	2697295	+	LOC110687694	--	K08869 aarF domain-containing kinase | (RefSeq) uncharacterized protein LOC110687694 (A)	uncharacterized protein LOC110687694, partial [Chenopodium quinoa]	RecName: Full=Protein ACTIVITY OF BC1 COMPLEX KINASE 8, chloroplastic {ECO:0000303|PubMed:22694836}; Short=ABC1-LIKE KINASE 8 {ECO:0000303|PubMed:22694836}; EC=2.7.11.1 {ECO:0000250|UniProtKB:Q9MA15}; AltName: Full=ABC2 homolog protein 13 {ECO:0000303|PubMed:11346655}; Short=AtATH13 {ECO:0000303|PubMed:11346655}; AltName: Full=Oxidative stress-related ABC1-like protein 1, chloroplastic {ECO:00003…	SubName: Full=Uncharacterized protein {ECO:0000313|EMBL:KNA23206.1};	Predicted unusual protein kinase	GO:0009507,chloroplast; GO:0009941,chloroplast envelope; GO:0031969,chloroplast membrane; GO:0016021,integral component of membrane; GO:0005524,ATP binding; GO:0016301,kinase activity; GO:0005215,transporter activity; GO:0034599,cellular response to oxidative stress; GO:0007623,circadian rhythm; GO:0055072,iron ion homeostasis; GO:0010150,leaf senescence; GO:0046467,membrane lipid biosynthetic pr…	ABC1 family
gene-LOC110687753	2	3.14	1.31	0.16	0.24	1	68	105	44	5	8	33	0.177	-2.498	0.0016528	0.0270496	down	NW_018743920.1	403353	406655	+	LOC110687753	--	K13456 RPM1-interacting protein 4 | (RefSeq) RPM1-interacting protein 4-like isoform X1 (A)	RPM1-interacting protein 4-like isoform X1 [Chenopodium quinoa]	RecName: Full=RPM1-interacting protein 4;	SubName: Full=Uncharacterized protein {ECO:0000313|EMBL:KNA21186.1};	--	GO:0012505,endomembrane system; GO:0019897,extrinsic component of plasma membrane; GO:0016020,membrane; GO:0005886,plasma membrane; GO:0010204,defense response signaling pathway, resistance gene-independent; GO:0009816,defense response to bacterium, incompatible interaction; GO:0034051,negative regulation of plant-type hypersensitive response; GO:0009626,plant-type hypersensitive response; GO:000…	Cleavage site for pathogenic type III effector avirulence factor Avr
gene-LOC110687779	26.33	16.55	22.92	2.01	2.19	5.22	703	434	602	50	57	135	0.124	-3.015	4.38262e-11	3.86055e-09	down	NW_018743920.1	600461	604600	-	LOC110687779	--	K10949 ER lumen protein retaining receptor | (RefSeq) putative ER lumen protein-retaining receptor C28H8.4 (A)	putative ER lumen protein-retaining receptor C28H8.4 [Chenopodium quinoa]	RecName: Full=ER lumen protein-retaining receptor B;	SubName: Full=Uncharacterized protein {ECO:0000313|EMBL:KMS97095.1};	ER lumen protein retaining receptor	GO:0005789,endoplasmic reticulum membrane; GO:0005794,Golgi apparatus; GO:0000139,Golgi membrane; GO:0016021,integral component of membrane; GO:0046923,ER retention sequence binding; GO:0010204,defense response signaling pathway, resistance gene-independent; GO:0006621,protein retention in ER lumen; GO:0015031,protein transport; GO:0016192,vesicle-mediated transport	ER lumen protein retaining receptor
gene-LOC110687785	15.32	9.46	24.32	4.1	4.39	2.04	534	324	834	133	149	69	0.187	-2.421	5.5709e-12	5.61025e-10	down	NW_018743920.1	703582	705329	-	LOC110687785	--	K22794 flavonol-3-O-glucoside/galactoside glucosyltransferase [EC:2.4.1.239 2.4.1.-] | (RefSeq) anthocyanidin 3-O-glucoside 2''-O-glucosyltransferase-like (A)	LOW QUALITY PROTEIN: anthocyanidin 3-O-glucosyltransferase-like [Chenopodium quinoa]	RecName: Full=Anthocyanidin 3-O-glucosyltransferase; EC=2.4.1.115; AltName: Full=Anthocyanin rhamnosyl transferase; AltName: Full=Flavonol 3-O-glucosyltransferase; AltName: Full=UDP-glucose flavonoid 3-O-glucosyltransferase;	SubName: Full=Uncharacterized protein {ECO:0000313|EMBL:KMS97086.1};	UDP-glucuronosyl and UDP-glucosyl transferase	GO:0047213,anthocyanidin 3-O-glucosyltransferase activity; GO:0009718,anthocyanin-containing compound biosynthetic process	UDP-glucoronosyl and UDP-glucosyl transferase
gene-LOC110687833	8.31	7.23	7.77	0.24	0.07	0.35	515	440	474	14	4	21	0.024	-5.372	1.72784e-26	1.17453e-23	down	NW_018743920.1	1545967	1550175	+	LOC110687833	--	--	--	--	--	--	--	--
gene-LOC110687834	19.62	37.55	17.86	5.62	4.59	5.19	768	1444	688	205	175	197	0.163	-2.613	7.09973e-09	4.36616e-07	down	NW_018743920.1	1551695	1553765	+	LOC110687834	--	K07418 cytochrome P450 family 2 subfamily J [EC:1.14.14.1 1.14.14.73 1.14.14.74 1.14.14.75] | (RefSeq) cytochrome P450 71A26-like (A)	cytochrome P450 71A3-like [Chenopodium quinoa]	RecName: Full=Cytochrome P450 71A4; EC=1.14.-.-; AltName: Full=CYPLXXIA4; AltName: Full=Cytochrome P-450EG2;	SubName: Full=Uncharacterized protein {ECO:0000313|EMBL:CAN67678.1};	Cytochrome P450 CYP2 subfamily	GO:0016021,integral component of membrane; GO:0020037,heme binding; GO:0005506,iron ion binding; GO:0004497,monooxygenase activity; GO:0016705,oxidoreductase activity, acting on paired donors, with incorporation or reduction of molecular oxygen	Cytochrome P450
gene-LOC110687835	0.34	0.21	0.21	0.02	0	0.04	20	12	12	1	0	2	0.059	-4.075	0.000253082	0.00566709	down	NW_018743920.1	1555361	1558492	+	LOC110687835	--	K07418 cytochrome P450 family 2 subfamily J [EC:1.14.14.1] | (RefSeq) cytochrome P450 71A8-like (A)	cytochrome P450 71A21-like [Chenopodium quinoa]	RecName: Full=Cytochrome P450 71A21; EC=1.14.-.-;	SubName: Full=Uncharacterized protein {ECO:0000313|EMBL:OAY30793.1};	Cytochrome P450 CYP2 subfamily	GO:0016021,integral component of membrane; GO:0016020,membrane; GO:0020037,heme binding; GO:0005506,iron ion binding; GO:0016709,oxidoreductase activity, acting on paired donors, with incorporation or reduction of molecular oxygen, NAD(P)H as one donor, and incorporation of one atom of oxygen; GO:0044550,secondary metabolite biosynthetic process	Cytochrome P450
gene-LOC110687863	0.53	0.49	1.08	0.3	0.33	0.11	36	33	72	19	22	7	0.304	-1.72	0.000787237	0.0148355	down	NW_018743920.1	2006865	2011855	-	LOC110687863	--	--	--	--	--	--	--	--
gene-LOC110687889	0.25	0.16	0.85	0	0	0	13	8	43	0	0	0	0.008	-6.92	2.85735e-06	0.000109427	down	NW_018743920.1	2545051	2549657	+	LOC110687889	--	--	putative B3 domain-containing protein Os03g0621600 [Chenopodium quinoa]	RecName: Full=B3 domain-containing protein Os01g0905400;	SubName: Full=Uncharacterized protein {ECO:0000313|EMBL:KNA11404.1};	--	GO:0005634,nucleus; GO:0003677,DNA binding; GO:0006355,regulation of transcription, DNA-templated; GO:0006351,transcription, DNA-templated	B3 DNA binding domain
gene-LOC110688074	3.98	2.5	5.32	0.11	0.38	0.34	227	140	299	6	21	19	0.061	-4.029	1.84675e-21	7.10105e-19	down	NW_018743920.1	4843327	4846183	-	LOC110688074	--	K13754 solute carrier family 24 (sodium/potassium/calcium exchanger), member 6 | (RefSeq) cation/calcium exchanger 4-like (A)	cation/calcium exchanger 4-like [Chenopodium quinoa]	RecName: Full=Cation/calcium exchanger 4; Short=AtCCX4; AltName: Full=Protein CATION CALCIUM EXCHANGER 4; AltName: Full=Protein CATION EXCHANGER 10;	SubName: Full=Uncharacterized protein {ECO:0000313|EMBL:KNA20363.1};	K+-dependent Na+:Ca2+ antiporter	GO:0016021,integral component of membrane; GO:0015297,antiporter activity; GO:0006812,cation transport; GO:0006813,potassium ion transport; GO:0006814,sodium ion transport	Sodium/calcium exchanger protein
gene-LOC110688271	25.77	35.47	5.93	5.59	4.67	9.13	1104	1493	250	223	195	379	0.224	-2.157	0.00148493	0.0247707	down	NW_018743920.1	7095407	7098515	+	LOC110688271	--	K11778 ditrans,polycis-polyprenyl diphosphate synthase [EC:2.5.1.87] | (RefSeq) dehydrodolichyl diphosphate synthase 2-like (A)	dehydrodolichyl diphosphate synthase 2-like [Chenopodium quinoa]	RecName: Full=Dehydrodolichyl diphosphate synthase 2; Short=Dedol-PP synthase 2; EC=2.5.1.-;	RecName: Full=Alkyl transferase {ECO:0000256|RuleBase:RU363018}; EC=2.5.1.- {ECO:0000256|RuleBase:RU363018};	Cis-prenyltransferase	GO:0009507,chloroplast; GO:0009570,chloroplast stroma; GO:0005829,cytosol; GO:0002094,polyprenyltransferase activity; GO:0009668,plastid membrane organization; GO:0016094,polyprenol biosynthetic process; GO:0006486,protein glycosylation	Putative undecaprenyl diphosphate synthase
gene-LOC110688306	0.93	2.18	1.26	0.18	0.12	0.32	39	90	52	7	5	13	0.116	-3.105	2.2021e-06	8.68676e-05	down	NW_018743920.1	7416364	7419334	-	LOC110688306	--	K05909 laccase [EC:1.10.3.2] | (RefSeq) laccase-4-like (A)	laccase-4-like [Chenopodium quinoa]	RecName: Full=Laccase-4; EC=1.10.3.2; AltName: Full=Benzenediol:oxygen oxidoreductase 4; AltName: Full=Diphenol oxidase 4; AltName: Full=Protein IRREGULAR XYLEM 12; AltName: Full=Urishiol oxidase 4; Flags: Precursor;	RecName: Full=Laccase {ECO:0000256|RuleBase:RU361119}; EC=1.10.3.2 {ECO:0000256|RuleBase:RU361119}; AltName: Full=Benzenediol:oxygen oxidoreductase {ECO:0000256|RuleBase:RU361119}; AltName: Full=Diphenol oxidase {ECO:0000256|RuleBase:RU361119}; AltName: Full=Urishiol oxidase {ECO:0000256|RuleBase:RU361119};	Multicopper oxidases	GO:0048046,apoplast; GO:0005507,copper ion binding; GO:0052716,hydroquinone:oxygen oxidoreductase activity; GO:0016491,oxidoreductase activity; GO:0016722,oxidoreductase activity, oxidizing metal ions; GO:0009809,lignin biosynthetic process; GO:0046274,lignin catabolic process; GO:0009834,plant-type secondary cell wall biogenesis	Multicopper oxidase
gene-LOC110688347	75.09	107.34	42.31	33.75	31.51	39.19	1481	2080	821	620	605	749	0.368	-1.444	0.00215232	0.0331575	down	NW_018743920.1	7761505	7763399	+	LOC110688347	--	--	universal stress protein PHOS34-like [Chenopodium quinoa]	RecName: Full=Universal stress protein A-like protein;	SubName: Full=Uncharacterized protein {ECO:0000313|EMBL:ESW04023.1};	--	GO:0005886,plasma membrane; GO:0016208,AMP binding; GO:0006950,response to stress	Universal stress protein family
gene-LOC110688371	7.08	6.55	9.6	4.88	3.52	4.82	341	310	455	219	165	225	0.491	-1.027	0.000112476	0.00284116	down	NW_018743920.1	7934449	7936858	-	LOC110688371	--	K01176 alpha-amylase [EC:3.2.1.1] | (RefSeq) lectin-domain containing receptor kinase VI.3-like (A)	L-type lectin-domain containing receptor kinase IV.2-like [Chenopodium quinoa]	RecName: Full=L-type lectin-domain containing receptor kinase IV.2 {ECO:0000303|PubMed:19773388}; Short=Arabidopsis thaliana lectin-receptor kinase a4 {ECO:0000303|PubMed:19773388}; Short=AthlecRK-a4 {ECO:0000303|Ref.6}; Short=LecRK-IV.2 {ECO:0000303|PubMed:19773388}; EC=2.7.11.1 {ECO:0000255|PROSITE-ProRule:PRU00159}; AltName: Full=Protein SMALL, GLUED-TOGETHER, AND COLLAPSED POLLEN {ECO:0000303…	SubName: Full=Uncharacterized protein {ECO:0000313|EMBL:OAY61180.1};	--	GO:0016021,integral component of membrane; GO:0005886,plasma membrane; GO:0005524,ATP binding; GO:0030246,carbohydrate binding; GO:0004674,protein serine/threonine kinase activity; GO:0042742,defense response to bacterium; GO:0009555,pollen development	Legume lectin domain
gene-LOC110688372	2.07	1.46	3.46	1.18	1.5	0.95	162	112	266	86	114	72	0.452	-1.147	8.22234e-05	0.00215427	down	NW_018743920.1	7938241	7942151	-	LOC110688372	--	K01176 alpha-amylase [EC:3.2.1.1] | (RefSeq) lectin-domain containing receptor kinase VI.3-like (A)	L-type lectin-domain containing receptor kinase IV.1-like [Chenopodium quinoa]	RecName: Full=L-type lectin-domain containing receptor kinase IV.2 {ECO:0000303|PubMed:19773388}; Short=Arabidopsis thaliana lectin-receptor kinase a4 {ECO:0000303|PubMed:19773388}; Short=AthlecRK-a4 {ECO:0000303|Ref.6}; Short=LecRK-IV.2 {ECO:0000303|PubMed:19773388}; EC=2.7.11.1 {ECO:0000255|PROSITE-ProRule:PRU00159}; AltName: Full=Protein SMALL, GLUED-TOGETHER, AND COLLAPSED POLLEN {ECO:0000303…	SubName: Full=Uncharacterized protein {ECO:0000313|EMBL:KNA02682.1};	--	GO:0016021,integral component of membrane; GO:0005886,plasma membrane; GO:0005524,ATP binding; GO:0030246,carbohydrate binding; GO:0004674,protein serine/threonine kinase activity; GO:0042742,defense response to bacterium; GO:0009555,pollen development	Legume lectin domain
gene-LOC110688374	1.1	1.69	1.01	0.59	0.32	0.52	52	79	47	26	15	24	0.309	-1.696	0.00126292	0.0217619	down	NW_018743920.1	7950748	7953123	-	LOC110688374	--	K01176 alpha-amylase [EC:3.2.1.1] | (RefSeq) lectin-domain containing receptor kinase VI.3-like (A)	L-type lectin-domain containing receptor kinase IV.2-like [Chenopodium quinoa]	RecName: Full=L-type lectin-domain containing receptor kinase IV.2 {ECO:0000303|PubMed:19773388}; Short=Arabidopsis thaliana lectin-receptor kinase a4 {ECO:0000303|PubMed:19773388}; Short=AthlecRK-a4 {ECO:0000303|Ref.6}; Short=LecRK-IV.2 {ECO:0000303|PubMed:19773388}; EC=2.7.11.1 {ECO:0000255|PROSITE-ProRule:PRU00159}; AltName: Full=Protein SMALL, GLUED-TOGETHER, AND COLLAPSED POLLEN {ECO:0000303…	SubName: Full=Uncharacterized protein {ECO:0000313|EMBL:KNA02682.1};	--	GO:0016021,integral component of membrane; GO:0005886,plasma membrane; GO:0005524,ATP binding; GO:0030246,carbohydrate binding; GO:0004674,protein serine/threonine kinase activity; GO:0042742,defense response to bacterium; GO:0009555,pollen development	Legume lectin domain
gene-LOC110688397	6.61	5.21	7.26	3.48	4.16	2.78	400	310	432	196	245	163	0.459	-1.124	4.46578e-08	2.41133e-06	down	NW_018743920.1	8193136	8196163	+	LOC110688397	--	K14494 DELLA protein | (RefSeq) DELLA protein GAI-like (A)	scarecrow-like protein 30 [Chenopodium quinoa]	RecName: Full=Scarecrow-like protein 14; Short=AtSCL14; AltName: Full=GRAS family protein 2; Short=AtGRAS-2;	SubName: Full=Uncharacterized protein {ECO:0000313|EMBL:KNA10642.1};	--	GO:0005829,cytosol; GO:0005634,nucleus; GO:0003700,DNA-binding transcription factor activity; GO:0043565,sequence-specific DNA binding; GO:0045893,positive regulation of transcription, DNA-templated; GO:0006355,regulation of transcription, DNA-templated; GO:0009410,response to xenobiotic stimulus; GO:0006351,transcription, DNA-templated	GRAS domain family
gene-LOC110688407	2.4	2.41	1.95	0.93	1.33	0.98	91	90	73	33	49	36	0.39	-1.357	0.000246201	0.00553581	down	NW_018743920.1	8280494	8284018	+	LOC110688407	--	K00729 dolichyl-phosphate beta-glucosyltransferase [EC:2.4.1.117] | (RefSeq) dolichyl-phosphate beta-glucosyltransferase-like (A)	RHOMBOID-like protein 1 [Chenopodium quinoa]	RecName: Full=RHOMBOID-like protein 1 {ECO:0000303|PubMed:16223493, ECO:0000303|PubMed:17181860}; Short=AtRBL1 {ECO:0000303|PubMed:16223493, ECO:0000303|PubMed:17181860}; EC=3.4.21.- {ECO:0000305};	RecName: Full=Rhomboid-like protein {ECO:0000256|RuleBase:RU362115}; EC=3.4.21.- {ECO:0000256|RuleBase:RU362115};	Rhomboid family proteins	GO:0005794,Golgi apparatus; GO:0000139,Golgi membrane; GO:0016021,integral component of membrane; GO:0004252,serine-type endopeptidase activity	Rhomboid family
gene-LOC110688529	2.05	1.29	5.64	0.62	1.43	0.81	71	44	192	20	48	27	0.286	-1.806	0.000598494	0.0118639	down	NW_018743920.1	9638536	9643611	+	LOC110688529	--	--	--	--	--	--	--	--
gene-LOC110688533	862.45	612.2	436.89	336.74	183.54	267.9	28145	19627	14028	10236	5831	8471	0.34	-1.558	0.000279871	0.00617615	down	NW_018742309.1	5293395	5299115	-	LOC110688533	--	K00499 choline monooxygenase [EC:1.14.15.7] | (RefSeq) choline monooxygenase, chloroplastic-like (A)	choline monooxygenase, chloroplastic-like [Chenopodium quinoa]	RecName: Full=Choline monooxygenase, chloroplastic; EC=1.14.15.7; Flags: Precursor;	SubName: Full=Choline monooxygenase {ECO:0000313|EMBL:AFG28558.1};	--	GO:0009570,chloroplast stroma; GO:0051537,2 iron, 2 sulfur cluster binding; GO:0019133,choline monooxygenase activity; GO:0005506,iron ion binding; GO:0016708,oxidoreductase activity, acting on paired donors, with incorporation or reduction of molecular oxygen, NAD(P)H as one donor, and incorporation of two atoms of oxygen into one donor; GO:0019439,aromatic compound catabolic process; GO:0019285…	Ring hydroxylating alpha subunit (catalytic domain)
gene-LOC110688683	0.91	0.59	2.07	0	0.03	0	68	43	152	0	2	0	0.007	-7.164	4.72972e-10	3.56527e-08	down	NW_018743937.1	465339	471523	+	LOC110688683	--	--	--	--	--	--	--	--
gene-LOC110688705	0.41	0.09	0.58	0.02	0	0	18	4	25	1	0	0	0.021	-5.551	0.000192939	0.00448115	down	NW_018743937.1	1800033	1812604	+	LOC110688705	--	--	uncharacterized protein LOC110688705 isoform X1 [Chenopodium quinoa]	--	SubName: Full=Uncharacterized protein {ECO:0000313|EMBL:KNA05129.1};	--	--	--
gene-LOC110688707	1.1	0.87	1.32	0.29	0.4	0.36	107	83	126	26	38	34	0.272	-1.881	1.58043e-10	1.29381e-08	down	NW_018743937.1	1830929	1838388	-	LOC110688707	--	K00620 glutamate N-acetyltransferase / amino-acid N-acetyltransferase [EC:2.3.1.35 2.3.1.1] | (RefSeq) arginine biosynthesis bifunctional protein ArgJ, chloroplastic-like (A)	uncharacterized protein LOC110688707 isoform X1 [Chenopodium quinoa]	RecName: Full=Arginine biosynthesis bifunctional protein ArgJ, chloroplastic {ECO:0000255|HAMAP-Rule:MF_03124}; Includes: RecName: Full=Glutamate N-acetyltransferase {ECO:0000255|HAMAP-Rule:MF_03124}; Short=GAT {ECO:0000255|HAMAP-Rule:MF_03124}; EC=2.3.1.35 {ECO:0000255|HAMAP-Rule:MF_03124}; AltName: Full=Ornithine acetyltransferase {ECO:0000255|HAMAP-Rule:MF_03124}; Short=OATase {ECO:0000255|HAM…	RecName: Full=Arginine biosynthesis bifunctional protein ArgJ, chloroplastic {ECO:0000256|HAMAP-Rule:MF_03124}; Includes: RecName: Full=Amino-acid acetyltransferase {ECO:0000256|HAMAP-Rule:MF_03124}; EC=2.3.1.1 {ECO:0000256|HAMAP-Rule:MF_03124}; AltName: Full=N-acetylglutamate synthase {ECO:0000256|HAMAP-Rule:MF_03124}; Short=AGS {ECO:0000256|HAMAP-Rule:MF_03124}; Includes: RecName: Full=Glutamat…	--	GO:0009507,chloroplast; GO:0004042,acetyl-CoA:L-glutamate N-acetyltransferase activity; GO:0004358,glutamate N-acetyltransferase activity; GO:0103045,methione N-acyltransferase activity; GO:0006526,arginine biosynthetic process	--
gene-LOC110688718	0.64	0.42	0.86	0.21	0.17	0.11	53	34	70	16	14	9	0.222	-2.174	7.00022e-07	3.02815e-05	down	NW_018743937.1	2253593	2258082	-	LOC110688718	--	--	--	--	--	--	--	--
gene-LOC110688738	3.56	3.67	5.31	0	0	0	145	147	213	0	0	0	0.001	-10.022	1.4886e-16	2.83333e-14	down	NW_018743937.1	3574337	3577326	+	LOC110688738	--	--	--	--	--	--	--	--
gene-LOC110688740	0.41	0.32	0.97	0.2	0.09	0.08	27	21	63	12	6	5	0.193	-2.375	0.000131931	0.00323806	down	NW_018743937.1	3589853	3593975	-	LOC110688740	--	K17604 zinc finger SWIM domain-containing protein 3 | (RefSeq) protein FAR-RED IMPAIRED RESPONSE 1-like (A)	protein FAR1-RELATED SEQUENCE 8-like [Chenopodium quinoa]	RecName: Full=Protein FAR-RED IMPAIRED RESPONSE 1;	SubName: Full=Uncharacterized protein {ECO:0000313|EMBL:ONH89763.1};	--	GO:0005634,nucleus; GO:0003700,DNA-binding transcription factor activity; GO:0008270,zinc ion binding; GO:0010018,far-red light signaling pathway; GO:0042753,positive regulation of circadian rhythm; GO:0045893,positive regulation of transcription, DNA-templated; GO:0010017,red or far-red light signaling pathway; GO:0009585,red, far-red light phototransduction; GO:0010218,response to far red light…	MULE transposase domain
gene-LOC110688752	2.57	1.92	2.24	1.11	1.18	1.25	234	172	201	94	105	110	0.441	-1.182	1.28449e-05	0.000432331	down	NW_018743937.1	4345596	4355696	-	LOC110688752	--	K21444 poly(rC)-binding protein 3/4 | (RefSeq) KH domain-containing protein HEN4-like (A)	KH domain-containing protein HEN4-like [Chenopodium quinoa]	RecName: Full=RNA-binding KH domain-containing protein RCF3 {ECO:0000305|PubMed:23087326}; AltName: Full=Protein ENHANCED STRESS RESPONSE 1 {ECO:0000303|PubMed:25985302}; AltName: Full=Protein HIGH OSMOTIC STRESS GENE EXPRESSION 5 {ECO:0000303|PubMed:24146632}; AltName: Full=Protein REGULATOR OF CBF GENE EXPRESSION 3 {ECO:0000303|PubMed:23087326}; AltName: Full=Protein SHINY 1 {ECO:0000303|PubMed…	SubName: Full=Uncharacterized protein {ECO:0000313|EMBL:KNA22988.1};	PolyC-binding proteins alphaCP-1 and related KH domain proteins	GO:0010445,nuclear dicing body; GO:0016607,nuclear speck; GO:0070878,primary miRNA binding; GO:0010286,heat acclimation; GO:0009867,jasmonic acid mediated signaling pathway; GO:0006397,mRNA processing; GO:0031053,primary miRNA processing; GO:1900150,regulation of defense response to fungus; GO:0010468,regulation of gene expression; GO:0006970,response to osmotic stress; GO:0008380,RNA splicing	KH domain
gene-LOC110688832	0.35	0.24	0.76	0.04	0.08	0	9	6	19	1	2	0	0.08	-3.651	0.00186444	0.0297584	down	NW_018743942.1	1458441	1459800	-	LOC110688832	--	K15042 importin subunit alpha-6/7 | (RefSeq) importin subunit alpha-4-like (A)	uncharacterized protein LOC110688832 [Chenopodium quinoa]	--	SubName: Full=Uncharacterized protein {ECO:0000313|EMBL:KMT08054.1};	--	--	--
gene-LOC110688896	8.48	8.11	7.39	3.25	4.45	2.86	98	92	84	35	50	32	0.361	-1.471	2.51574e-05	0.000774185	down	NW_018743942.1	324700	325925	+	LOC110688896	--	--	--	--	--	--	--	--
gene-LOC110688935	1.77	2.25	2.18	0.4	0.53	0.08	24	30	29	5	7	1	0.132	-2.921	2.13447e-05	0.00067151	down	NW_018743946.1	4277854	4281917	-	LOC110688935	--	K14964 Set1/Ash2 histone methyltransferase complex subunit ASH2 | (RefSeq) hypothetical protein (A)	uncharacterized protein LOC110688935 [Chenopodium quinoa]	--	SubName: Full=Uncharacterized protein {ECO:0000313|EMBL:KNA18197.1};	--	--	Universal stress protein family
gene-LOC110689175	4.97	7.42	6.17	0	0	0	45	66	55	0	0	0	0.003	-8.469	3.99456e-11	3.54967e-09	down	NW_018742329.1	6282751	6284353	+	LOC110689175	--	--	--	--	--	--	--	--
gene-LOC110689187	20.66	20.05	16.15	8.85	6.62	6.74	962	917	740	384	300	304	0.321	-1.639	3.91952e-07	1.77413e-05	down	NW_018743955.1	3163865	3182678	+	LOC110689187	--	K10268 F-box and leucine-rich repeat protein 2/20 | (RefSeq) F-box protein At3g58530-like (A)	F-box protein At3g58530-like [Chenopodium quinoa]	RecName: Full=F-box protein At3g58530;	SubName: Full=Uncharacterized protein {ECO:0000313|EMBL:KNA17980.1};	Leucine rich repeat proteins, some proteins contain F-box	GO:0005829,cytosol	Leucine Rich repeat
gene-LOC110689194	8.75	12.24	5.63	2.6	2.22	3.75	166	228	105	46	41	69	0.259	-1.948	0.000126171	0.00312084	down	NW_018743955.1	3398439	3399387	+	LOC110689194	--	K01870 isoleucyl-tRNA synthetase [EC:6.1.1.5] | (RefSeq) isoleucine--tRNA ligase, chloroplastic/mitochondrial-like (A)	dirigent protein 23-like [Chenopodium quinoa]	RecName: Full=Dirigent protein 23; Short=AtDIR23; Flags: Precursor;	RecName: Full=Dirigent protein {ECO:0000256|RuleBase:RU363099};	--	GO:0048046,apoplast; GO:0016853,isomerase activity	Dirigent-like protein
gene-LOC110689195	4.5	5.44	3.1	1.4	1.03	2.53	90	107	61	26	20	49	0.312	-1.681	0.00227942	0.0346996	down	NW_018743955.1	3401605	3402605	+	LOC110689195	--	--	--	--	--	--	--	--
gene-LOC110689220	54.56	68.07	28.95	23.75	20.09	26.75	1063	1303	555	431	381	505	0.371	-1.43	0.0019894	0.0312619	down	NW_018743955.1	4750544	4758557	-	LOC110689220	--	K03671 thioredoxin 1 | (RefSeq) Thioredoxin H-type (A)	thioredoxin-like 3-1, chloroplastic [Chenopodium quinoa]	RecName: Full=Thioredoxin-like 3-1, chloroplastic; AltName: Full=Thioredoxin WCRKC-1; Flags: Precursor;	SubName: Full=Uncharacterized protein {ECO:0000313|EMBL:KNA22536.1};	Thioredoxin	GO:0009570,chloroplast stroma; GO:0016671,oxidoreductase activity, acting on a sulfur group of donors, disulfide as acceptor; GO:0015035,protein disulfide oxidoreductase activity; GO:0047134,protein-disulfide reductase activity; GO:0004791,thioredoxin-disulfide reductase activity; GO:0045454,cell redox homeostasis; GO:0034599,cellular response to oxidative stress; GO:0006662,glycerol ether metabo…	Thioredoxin
gene-LOC110689221	0.89	1.56	0.12	0.03	0.19	0.03	29	50	4	1	6	1	0.071	-3.817	0.000923132	0.0169517	down	NW_018743955.1	4769555	4771644	-	LOC110689221	--	K13390 (R,S)-reticuline 7-O-methyltransferase [EC:2.1.1.291] | (RefSeq) (R,S)-reticuline 7-O-methyltransferase (A)	(R,S)-reticuline 7-O-methyltransferase-like [Chenopodium quinoa]	RecName: Full=(R,S)-reticuline 7-O-methyltransferase {ECO:0000303|PubMed:14675446}; Short=7OMT {ECO:0000303|PubMed:14675446}; EC=2.1.1.291 {ECO:0000269|PubMed:14675446};	SubName: Full=Uncharacterized protein {ECO:0000313|EMBL:KNA13417.1};	Hydroxyindole-O-methyltransferase and related SAM-dependent methyltransferases	GO:0102918,(R)-reticuline 7-O-methyltransferase activity; GO:0102917,(S)-reticuline 7-O-methyltransferase activity; GO:0042802,identical protein binding; GO:0008171,O-methyltransferase activity; GO:0046983,protein dimerization activity; GO:0009821,alkaloid biosynthetic process	O-methyltransferase domain
gene-LOC110689234	2.27	1.84	3.07	0.28	1.3	1.13	79	63	105	9	44	38	0.32	-1.643	0.00186861	0.0298	down	NW_018743955.1	5472400	5476268	+	LOC110689234	--	--	--	--	--	--	--	--
gene-LOC110689254	0.65	1.46	0.44	0.35	0.24	0.15	44	97	29	22	16	10	0.226	-2.148	0.00176309	0.0285598	down	NW_018743955.1	6054253	6057771	+	LOC110689254	--	K13466 EIX receptor 1/2 | (RefSeq) LRR receptor-like serine/threonine-protein kinase GSO1 (A)	LRR receptor-like serine/threonine-protein kinase FLS2 [Chenopodium quinoa]	RecName: Full=Receptor-like protein EIX2 {ECO:0000305}; AltName: Full=EIX receptor 2 {ECO:0000312|EMBL:AAR28378.1}; Flags: Precursor;	SubName: Full=Uncharacterized protein {ECO:0000313|EMBL:KNA24898.1};	FOG: Leucine rich repeat	GO:0016021,integral component of membrane; GO:0005886,plasma membrane; GO:0050832,defense response to fungus	Leucine rich repeat
gene-LOC110689352	5.06	6.18	4.34	1.79	1.78	1.27	70	84	59	23	24	17	0.252	-1.99	5.57203e-06	0.000201818	down	NW_018743955.1	7260818	7263271	+	LOC110689352	--	--	--	--	--	--	--	--
gene-LOC110689388	2.36	3.25	1.77	0.84	0.81	1.4	96	130	71	32	32	55	0.335	-1.577	0.00165722	0.0271016	down	NW_018743955.1	7641727	7647334	-	LOC110689388	--	K14638 solute carrier family 15 (peptide/histidine transporter), member 3/4 | (RefSeq) protein NRT1/ PTR FAMILY 5.2-like (A)	protein NRT1/ PTR FAMILY 5.2-like [Chenopodium quinoa]	RecName: Full=Protein NRT1/ PTR FAMILY 5.2; Short=AtNPF5.2; AltName: Full=Peptide transporter PTR3-A; Short=AtPTR3;	SubName: Full=Uncharacterized protein {ECO:0000313|EMBL:KNA23392.1};	H+/oligopeptide symporter	GO:0016021,integral component of membrane; GO:0042936,NA; GO:0022857,transmembrane transporter activity; GO:0042937,tripeptide transmembrane transporter activity; GO:0042742,defense response to bacterium; GO:0042938,dipeptide transport; GO:0042538,hyperosmotic salinity response; GO:0009737,response to abscisic acid; GO:0080052,response to histidine; GO:0009753,response to jasmonic acid; GO:004320…	POT family
gene-LOC110689493	2.67	3.48	1.09	0.11	0	0	25	32	10	1	0	0	0.013	-6.27	1.45137e-05	0.00047918	down	NW_018743955.1	6120922	6121865	+	LOC110689493	--	K13466 EIX receptor 1/2 | (RefSeq) LRR receptor-like serine/threonine-protein kinase GSO1 (A)	uncharacterized protein LOC110689493 [Chenopodium quinoa]	RecName: Full=Receptor-like protein EIX2 {ECO:0000305}; AltName: Full=EIX receptor 2 {ECO:0000312|EMBL:AAR28378.1}; Flags: Precursor;	SubName: Full=Uncharacterized protein {ECO:0000313|EMBL:KNA06913.1};	FOG: Leucine rich repeat	GO:0016021,integral component of membrane; GO:0005886,plasma membrane; GO:0050832,defense response to fungus	--
gene-LOC110689494	8.65	13.53	2.31	0.11	0.11	0.29	248	381	65	3	3	8	0.016	-5.96	4.28616e-13	5.09878e-11	down	NW_018743955.1	6122368	6123885	+	LOC110689494	--	K13466 EIX receptor 1/2 | (RefSeq) LRR receptor-like serine/threonine-protein kinase GSO1 (A)	probable LRR receptor-like serine/threonine-protein kinase At1g12460 [Chenopodium quinoa]	RecName: Full=Receptor-like protein EIX2 {ECO:0000305}; AltName: Full=EIX receptor 2 {ECO:0000312|EMBL:AAR28378.1}; Flags: Precursor;	SubName: Full=Uncharacterized protein {ECO:0000313|EMBL:KNA02687.1};	FOG: Leucine rich repeat	GO:0016021,integral component of membrane; GO:0005886,plasma membrane; GO:0050832,defense response to fungus	Leucine rich repeat
gene-LOC110689694	5.33	8.92	3.73	2.33	1.47	2.42	250	411	172	102	67	110	0.277	-1.853	0.000324307	0.00706257	down	NW_018743977.1	1135635	1139127	+	LOC110689694	--	K13429 chitin elicitor receptor kinase 1 | (RefSeq) lysM domain receptor-like kinase 3 (A)	serine/threonine receptor-like kinase NFP [Chenopodium quinoa]	RecName: Full=Serine/threonine receptor-like kinase NFP {ECO:0000303|PubMed:16723404}; Short=RLK NFP {ECO:0000303|PubMed:16723404}; AltName: Full=Nod factor perception protein {ECO:0000303|PubMed:12753588}; EC=2.7.10.- {ECO:0000255|PROSITE-ProRule:PRU00159}; AltName: Full=Nod-factor receptor 5; Flags: Precursor;	SubName: Full=Uncharacterized protein {ECO:0000313|EMBL:KNA21988.1};	--	GO:0016021,integral component of membrane; GO:0005886,plasma membrane; GO:0005775,vacuolar lumen; GO:0005524,ATP binding; GO:0004713,protein tyrosine kinase activity; GO:0006952,defense response; GO:0009877,nodulation; GO:1902290,positive regulation of defense response to oomycetes; GO:0006486,protein glycosylation; GO:1900150,regulation of defense response to fungus; GO:0002237,response to molec…	Protein kinase domain
gene-LOC110689730	25.52	28.59	16.12	10.86	12.87	15.11	666	733	414	264	327	382	0.445	-1.168	0.003566	0.0490416	down	NW_018743977.1	1757923	1762734	+	LOC110689730	--	K15631 molybdenum cofactor sulfurtransferase [EC:2.8.1.9] | (RefSeq) molybdenum cofactor sulfurase (A)	mitochondrial amidoxime-reducing component 1-like [Chenopodium quinoa]	RecName: Full=Molybdenum cofactor sulfurase {ECO:0000255|HAMAP-Rule:MF_03050}; Short=MCS {ECO:0000255|HAMAP-Rule:MF_03050}; Short=MOS {ECO:0000255|HAMAP-Rule:MF_03050}; Short=MoCo sulfurase {ECO:0000255|HAMAP-Rule:MF_03050}; EC=2.8.1.9 {ECO:0000255|HAMAP-Rule:MF_03050}; AltName: Full=Molybdenum cofactor sulfurase-like protein 3 {ECO:0000255|HAMAP-Rule:MF_03050}; AltName: Full=Molybdenum cofactor …	SubName: Full=Uncharacterized protein {ECO:0000313|EMBL:KNA08213.1};	Uncharacterized Fe-S protein	GO:0008265,Mo-molybdopterin cofactor sulfurase activity; GO:0102867,molybdenum cofactor sulfurtransferase activity; GO:0030151,molybdenum ion binding; GO:0030170,pyridoxal phosphate binding; GO:0006777,Mo-molybdopterin cofactor biosynthetic process	MOSC N-terminal beta barrel domain
gene-LOC110689747	2.76	1.37	2.53	0	0	0	70	34	63	0	0	0	0.003	-8.419	3.90572e-11	3.48194e-09	down	NW_018743977.1	1996516	1998702	-	LOC110689747	--	--	--	--	--	--	--	--
gene-LOC110689750	3.35	2.81	3.01	1.73	0.68	0.91	201	166	178	97	40	53	0.306	-1.707	9.81397e-05	0.00252937	down	NW_018743977.1	2057128	2068053	-	LOC110689750	--	K05941 glutathione gamma-glutamylcysteinyltransferase [EC:2.3.2.15] | (RefSeq) glutathione gamma-glutamylcysteinyltransferase 3-like isoform X1 (A)	glutathione gamma-glutamylcysteinyltransferase 3-like isoform X1 [Chenopodium quinoa]	RecName: Full=Glutathione gamma-glutamylcysteinyltransferase 1; EC=2.3.2.15; AltName: Full=LjPCS1-8R; AltName: Full=Phytochelatin synthase 1;	SubName: Full=Uncharacterized protein {ECO:0000313|EMBL:KNA23608.1};	Phytochelatin synthase	GO:0016756,glutathione gamma-glutamylcysteinyltransferase activity; GO:0046872,metal ion binding; GO:0046938,phytochelatin biosynthetic process; GO:0010038,response to metal ion	Phytochelatin synthase
gene-LOC110689821	15.66	17.95	11.21	3.52	2.97	3.46	602	678	424	126	111	129	0.18	-2.474	6.31548e-11	5.4269e-09	down	NW_018743977.1	3812839	3817280	+	LOC110689821	--	--	--	--	--	--	--	--
gene-LOC110689882	0.78	0.42	1.38	0	0	0	19	10	33	0	0	0	0.008	-6.932	6.17262e-07	2.70084e-05	down	NW_018742329.1	1301550	1302940	-	LOC110689882	--	--	uncharacterized protein LOC110689882 [Chenopodium quinoa]	--	--	--	--	--
gene-LOC110689952	4.17	2.88	4.27	0.36	2.33	0.78	149	101	150	12	81	27	0.249	-2.003	0.000572234	0.0114468	down	NW_018743979.1	3107468	3109600	-	LOC110689952	--	K01303 acylaminoacyl-peptidase [EC:3.4.19.1] | (RefSeq) uncharacterized LOC101311565 (A)	uncharacterized protein LOC110689952 [Chenopodium quinoa]	RecName: Full=Uncharacterized mitochondrial protein AtMg00860; AltName: Full=ORF158;	SubName: Full=Putative reverse transcriptase domain, Ribonuclease H-like domain protein {ECO:0000313|EMBL:OTG24365.1};	FOG: Transposon-encoded proteins with TYA, reverse transcriptase, integrase domains in various combinations	GO:0005739,mitochondrion	RNase H-like domain found in reverse transcriptase
gene-LOC110689958	2.34	2.64	2.75	0	0	0	45	50	52	0	0	0	0.003	-8.273	6.16237e-11	5.31451e-09	down	NW_018742329.1	1869560	1872939	-	LOC110689958	--	--	--	--	--	--	--	--
gene-LOC110690005	0.32	0.12	0.43	0	0	0	46	17	62	0	0	0	0.004	-7.947	2.54084e-09	1.68213e-07	down	NW_018743979.1	2029221	2039007	+	LOC110690005	--	K00850 6-phosphofructokinase 1 [EC:2.7.1.11] | (RefSeq) uncharacterized protein LOC110711464 (A)	uncharacterized protein LOC110690005 [Chenopodium quinoa]	--	--	--	--	--
gene-LOC110690120	8.98	5.65	12.73	3.29	5.1	4.2	170	105	237	58	94	77	0.399	-1.325	6.56517e-06	0.000233567	down	NW_018743987.1	1104878	1106644	+	LOC110690120	--	--	--	--	--	--	--	--
gene-LOC110690250	2.38	1.64	2.74	0	0	0	183	124	207	0	0	0	0.001	-10.042	1.4267e-16	2.74295e-14	down	NW_018742329.1	2970922	2974769	+	LOC110690250	--	K15078 structure-specific endonuclease subunit SLX1 [EC:3.6.1.-] | (RefSeq) putative disease resistance protein RGA3 (A)	putative disease resistance protein RGA3 [Chenopodium quinoa]	RecName: Full=Putative disease resistance protein RGA4; AltName: Full=RGA4-blb;	SubName: Full=CC-NBS-LRR type resistance protein {ECO:0000313|EMBL:AFK13849.1};	Apoptotic ATPase	GO:0043531,ADP binding; GO:0005524,ATP binding; GO:0006952,defense response	NB-ARC domain
gene-LOC110690276	3.53	2.99	4.18	0.63	1.95	1.35	54	45	63	9	29	20	0.308	-1.7	0.000171155	0.00406195	down	NW_018744026.1	649602	650917	+	LOC110690276	--	--	--	--	--	--	--	--
gene-LOC110690310	40.86	64.49	32.31	19.02	17.43	27.26	761	1180	592	330	316	492	0.373	-1.424	0.00165154	0.0270404	down	NW_018742329.1	3014806	3016416	-	LOC110690310	--	K01255 leucyl aminopeptidase [EC:3.4.11.1] | (RefSeq) leucyl aminopeptidase (A)	cyclin-U1-1-like [Chenopodium quinoa]	RecName: Full=Cyclin-U1-1; Short=CycU1;1; AltName: Full=Cyclin-P2.1; Short=CycP2;1;	SubName: Full=Uncharacterized protein {ECO:0000313|EMBL:KMS95843.1};	Cyclin	GO:0019901,protein kinase binding; GO:0007049,cell cycle; GO:0051301,cell division; GO:0000079,regulation of cyclin-dependent protein serine/threonine kinase activity	Cyclin
gene-LOC110690425	8.84	6.97	14.75	0	0	0	270	209	443	0	0	0	0.001	-10.855	4.12813e-19	1.25717e-16	down	NW_018744041.1	1035904	1037639	+	LOC110690425	--	--	uncharacterized protein LOC110690425 isoform X1 [Chenopodium quinoa]	--	SubName: Full=Fgenesh protein 21 {ECO:0000313|EMBL:ABD83280.1};	--	--	Ciliary protein causing Leber congenital amaurosis disease
gene-LOC110690428	0.32	0.18	0.18	0	0	0	18	10	10	0	0	0	0.012	-6.33	1.67813e-05	0.000542749	down	NW_018744041.1	1042070	1045027	+	LOC110690428	--	K10405 kinesin family member C1 | (RefSeq) kinesin-like protein KIN-14N isoform X1 (A)	probable serine/threonine-protein kinase PBL3 [Chenopodium quinoa]	RecName: Full=Probable serine/threonine-protein kinase PBL3 {ECO:0000305}; EC=2.7.11.1 {ECO:0000305}; AltName: Full=PBS1-like protein 3 {ECO:0000303|PubMed:20413097}; AltName: Full=Protein kinase 2B {ECO:0000305};	SubName: Full=Uncharacterized protein {ECO:0000313|EMBL:KNA08744.1};	Serine/threonine protein kinase	GO:0005737,cytoplasm; GO:0005634,nucleus; GO:0005886,plasma membrane; GO:0005524,ATP binding; GO:0004675,transmembrane receptor protein serine/threonine kinase activity; GO:0007166,cell surface receptor signaling pathway; GO:0006952,defense response; GO:0006468,protein phosphorylation	Protein kinase domain
gene-LOC110690439	1.67	1.37	2.19	0.61	0.69	0.44	62	50	80	21	25	16	0.283	-1.819	2.18596e-07	1.04016e-05	down	NW_018744041.1	1189566	1195589	+	LOC110690439	--	--	--	--	--	--	--	--
gene-LOC110690513	5.52	4.84	6.17	2.73	2.69	1.79	150	129	165	69	71	47	0.365	-1.453	9.79844e-08	5.00667e-06	down	NW_018744041.1	1900735	1904053	-	LOC110690513	--	--	uncharacterized protein LOC110690513 [Chenopodium quinoa]	--	SubName: Full=Uncharacterized protein {ECO:0000313|EMBL:KNA25617.1};	--	GO:0016831,carboxy-lyase activity; GO:0016787,hydrolase activity	Amidohydrolase
gene-LOC110690651	1.53	1.65	1.55	0.93	0.68	1.03	83	88	83	47	36	54	0.467	-1.097	0.00350203	0.048389	down	NW_018744062.1	457664	470302	+	LOC110690651	--	--	uncharacterized protein LOC110690651 [Chenopodium quinoa]	--	SubName: Full=Uncharacterized protein {ECO:0000313|EMBL:KNA07318.1}; Flags: Fragment;	--	--	--
gene-LOC110690741	1.19	1.46	1.18	0.81	0.77	0.58	85	103	83	54	54	40	0.462	-1.114	0.00219359	0.0336572	down	NW_018744062.1	1739141	1747617	+	LOC110690741	--	K13430 serine/threonine-protein kinase PBS1 [EC:2.7.11.1] | (RefSeq) serine/threonine-protein kinase PBS1-like (A)	probable LRR receptor-like serine/threonine-protein kinase At1g06840 [Chenopodium quinoa]	RecName: Full=Probable LRR receptor-like serine/threonine-protein kinase At1g06840; EC=2.7.11.1; Flags: Precursor;	SubName: Full=Uncharacterized protein {ECO:0000313|EMBL:KNA15883.1}; Flags: Fragment;	--	GO:0016021,integral component of membrane; GO:0016020,membrane; GO:0005886,plasma membrane; GO:0005524,ATP binding; GO:0004674,protein serine/threonine kinase activity	Protein kinase domain
gene-LOC110690912	1.73	1.7	0.28	0.27	0	0.1	56	54	9	8	0	3	0.077	-3.702	0.00083574	0.0155646	down	NW_018744066.1	1171784	1173731	+	LOC110690912	--	K01183 chitinase [EC:3.2.1.14] | (RefSeq) acidic mammalian chitinase-like (A)	acidic mammalian chitinase-like [Chenopodium quinoa]	RecName: Full=Class V chitinase {ECO:0000303|PubMed:22936594}; Short=AtChiC {ECO:0000303|PubMed:22936594}; EC=3.2.1.14 {ECO:0000269|PubMed:21390509, ECO:0000269|PubMed:22936594}; Flags: Precursor;	SubName: Full=Uncharacterized protein {ECO:0000313|EMBL:KNA14195.1};	Chitinase	GO:0005618,cell wall; GO:0005576,extracellular region; GO:0008061,chitin binding; GO:0004568,chitinase activity; GO:0008843,endochitinase activity; GO:0035885,exochitinase activity; GO:0005975,carbohydrate metabolic process; GO:0006032,chitin catabolic process; GO:0009737,response to abscisic acid; GO:0009753,response to jasmonic acid; GO:0009651,response to salt stress	Glycosyl hydrolases family 18
gene-LOC110690935	4.9	2.8	6.57	0.67	1.1	0.65	219	123	289	28	48	28	0.146	-2.771	1.58885e-16	2.97944e-14	down	NW_018744066.1	1431655	1433890	+	LOC110690935	--	K15507 21S rRNA (GM2251-2'-O)-methyltransferase [EC:2.1.1.-] | (RefSeq) uncharacterized protein LOC110690935 (A)	uncharacterized protein LOC110690935 [Chenopodium quinoa]	--	SubName: Full=Uncharacterized protein {ECO:0000313|EMBL:KNA12979.1};	RNA Methylase, SpoU family	GO:0003723,RNA binding; GO:0008173,RNA methyltransferase activity; GO:0006396,RNA processing	SpoU rRNA Methylase family
gene-LOC110690955	4.07	6.01	5.24	2.69	1.11	1.16	109	158	138	67	29	30	0.269	-1.893	9.28872e-05	0.00241143	down	NW_018744066.1	1767044	1768383	-	LOC110690955	--	--	uncharacterized protein LOC110690955 [Chenopodium quinoa]	--	SubName: Full=Uncharacterized protein {ECO:0000313|EMBL:KNA13955.1};	--	--	Cotton fibre expressed protein
gene-LOC110691109	0.62	1.1	0.44	0	0	0	20	35	14	0	0	0	0.006	-7.266	4.24166e-07	1.91312e-05	down	NW_018744066.1	1186854	1189134	-	LOC110691109	--	--	--	--	--	--	--	--
gene-LOC110691348	1.43	2.06	1.39	0.38	0.67	0.43	24	34	23	6	11	7	0.246	-2.022	0.000681935	0.013184	down	NW_018742329.1	7212053	7214193	+	LOC110691348	--	--	--	--	--	--	--	--
gene-LOC110691386	57.01	37.99	43.19	22.57	19.37	17.49	1874	1227	1397	691	620	557	0.359	-1.479	1.00014e-07	5.10355e-06	down	NW_018744080.1	322573	327700	+	LOC110691386	--	K13415 protein brassinosteroid insensitive 1 [EC:2.7.10.1 2.7.11.1] | (RefSeq) uncharacterized protein LOC103413440 isoform X1 (A)	squamosa promoter-binding-like protein 17 isoform X1 [Chenopodium quinoa]	RecName: Full=Squamosa promoter-binding-like protein 17;	SubName: Full=Uncharacterized protein {ECO:0000313|EMBL:KNA10822.1};	--	GO:0005634,nucleus; GO:0003677,DNA binding; GO:0046872,metal ion binding; GO:0006355,regulation of transcription, DNA-templated; GO:0006351,transcription, DNA-templated	SBP domain
gene-LOC110691548	3.19	3.51	4.58	0.2	0	0.06	51	55	72	3	0	1	0.02	-5.661	9.08145e-12	8.72989e-10	down	NW_018744080.1	3869630	3872842	-	LOC110691548	--	--	protein FATTY ACID EXPORT 7-like [Chenopodium quinoa]	RecName: Full=Protein FATTY ACID EXPORT 7 {ECO:0000303|PubMed:25646734}; Short=At-FAX7 {ECO:0000303|PubMed:25646734};	SubName: Full=Uncharacterized protein {ECO:0000313|EMBL:KNA13616.1};	Predicted membrane protein	GO:0016021,integral component of membrane; GO:0005739,mitochondrion	Transmembrane proteins 14C
gene-LOC110691791	9.25	6.16	8.74	3.44	5.99	4.87	257	168	239	89	162	131	0.497	-1.008	0.000445203	0.00921061	down	NW_018744092.1	1664707	1667571	+	LOC110691791	--	K01456 peptide-N4-(N-acetyl-beta-glucosaminyl)asparagine amidase [EC:3.5.1.52] | (RefSeq) peptide-N(4)-(N-acetyl-beta- glucosaminyl)asparagine amidase isoform X1 (A)	probable aldo-keto reductase 4 [Chenopodium quinoa]	RecName: Full=Probable aldo-keto reductase 2; EC=1.1.1.-;	SubName: Full=Uncharacterized protein {ECO:0000313|EMBL:KNA12253.1};	Voltage-gated shaker-like K+ channel, subunit beta/KCNAB	GO:0016491,oxidoreductase activity	Aldo/keto reductase family
gene-LOC110691882	3.56	1.13	3.74	0.58	1.26	0.25	119	37	123	18	41	8	0.21	-2.254	0.000241682	0.00545677	down	NW_018744092.1	3361634	3367979	-	LOC110691882	--	K09458 3-oxoacyl-[acyl-carrier-protein] synthase II [EC:2.3.1.179] | (RefSeq) 3-oxoacyl-[acyl-carrier-protein] synthase, mitochondrial-like (A)	3-oxoacyl-[acyl-carrier-protein]	RecName: Full=3-oxoacyl-[acyl-carrier-protein] synthase, mitochondrial; EC=2.3.1.41; AltName: Full=Beta-ketoacyl-ACP synthase; AltName: Full=mtKAS; Flags: Precursor;	RecName: Full=3-oxoacyl-[acyl-carrier-protein] synthase {ECO:0000256|PIRNR:PIRNR000447};	3-oxoacyl-(acyl-carrier-protein) synthase (I and II)	GO:0005739,mitochondrion; GO:0004315,3-oxoacyl-[acyl-carrier-protein] synthase activity; GO:0006633,fatty acid biosynthetic process; GO:0010027,thylakoid membrane organization	Beta-ketoacyl synthase, N-terminal domain
gene-LOC110691899	8.13	9.83	7.18	4.06	3.48	4.26	144	171	125	67	60	73	0.385	-1.376	0.000216048	0.00495141	down	NW_018744092.1	3583532	3588542	-	LOC110691899	--	K01052 lysosomal acid lipase/cholesteryl ester hydrolase [EC:3.1.1.13] | (RefSeq) triacylglycerol lipase 2-like (A)	uncharacterized protein LOC110691899 [Chenopodium quinoa]	--	SubName: Full=Uncharacterized protein {ECO:0000313|EMBL:KNA20587.1};	--	GO:0016021,integral component of membrane	--
gene-LOC110692150	1.19	0.87	1.02	0	0	0	50	36	42	0	0	0	0.004	-8.067	2.64126e-10	2.07737e-08	down	NW_018744093.1	3087717	3095810	+	LOC110692150	--	--	--	--	--	--	--	--
gene-LOC110692151	1.48	1.66	1.41	0.55	0.73	0.59	96	106	90	33	46	37	0.336	-1.575	7.17636e-06	0.000253129	down	NW_018744093.1	3116955	3127676	+	LOC110692151	--	--	probable folate-biopterin transporter 3 [Chenopodium quinoa]	RecName: Full=Probable folate-biopterin transporter 3;	SubName: Full=Uncharacterized protein {ECO:0000313|EMBL:KNA13644.1};	--	GO:0016021,integral component of membrane	BT1 family
gene-LOC110692176	5.06	3.73	5.27	1.43	1.6	0.8	202	146	207	53	62	31	0.228	-2.134	4.72599e-12	4.78468e-10	down	NW_018744093.1	4079708	4091208	+	LOC110692176	--	K14318 nuclear pore complex protein Nup88 | (RefSeq) nuclear pore complex protein NUP88-like isoform X1 (A)	zinc finger protein-like 1 homolog [Chenopodium quinoa]	--	SubName: Full=Uncharacterized protein {ECO:0000313|EMBL:KNA10256.1};	Predicted E3 ubiquitin ligase	GO:0016021,integral component of membrane	--
gene-LOC110692289	9.12	10.87	12.09	0	0	0	164	192	214	0	0	0	0.001	-10.222	5.63352e-17	1.12869e-14	down	NW_018744100.1	731673	733844	-	LOC110692289	--	K01047 secretory phospholipase A2 [EC:3.1.1.4] | (RefSeq) phospholipase A2-alpha-like (A)	phospholipase A2-alpha-like [Chenopodium quinoa]	RecName: Full=Phospholipase A2-alpha {ECO:0000303|PubMed:16140037}; EC=3.1.1.4 {ECO:0000269|PubMed:16140037}; AltName: Full=Secretory phospholipase A2-alpha; Short=AtsPLA2-alpha; Flags: Precursor;	SubName: Full=Uncharacterized protein {ECO:0000313|EMBL:KNA21363.1};	--	GO:0031410,cytoplasmic vesicle; GO:0005576,extracellular region; GO:0005794,Golgi apparatus; GO:0005634,nucleus; GO:0005773,vacuole; GO:0005509,calcium ion binding; GO:0004623,phospholipase A2 activity; GO:0102567,phospholipase A2 activity (consuming 1,2-dipalmitoylphosphatidylcholine); GO:0102568,phospholipase A2 activity consuming 1,2-dioleoylphosphatidylethanolamine); GO:0050482,arachidonic ac…	Phospholipase A2
gene-LOC110692335	7.73	7.36	14.46	3.69	6.7	5.49	308	288	567	137	260	212	0.466	-1.103	0.000149302	0.00360627	down	NW_018744100.1	1489575	1493503	-	LOC110692335	--	--	uncharacterized protein LOC110692335 [Chenopodium quinoa]	--	SubName: Full=Uncharacterized protein {ECO:0000313|EMBL:KNA21356.1};	--	--	Protein of unknown function (DUF1005)
gene-LOC110692419	5.19	4.84	6.43	0	0	0	205	188	250	0	0	0	0.001	-10.381	8.52085e-18	1.97783e-15	down	NW_018744111.1	877199	879837	-	LOC110692419	--	--	--	--	--	--	--	--
gene-LOC110692624	2.06	2.4	3.69	1.12	1.64	0.9	71	81	125	36	55	30	0.381	-1.391	3.028e-05	0.000913269	down	NW_018744118.1	509106	514762	+	LOC110692624	--	--	ran GTPase-activating protein 1-like [Chenopodium quinoa]	--	SubName: Full=Uncharacterized protein {ECO:0000313|EMBL:KNA16085.1}; Flags: Fragment;	--	GO:0016021,integral component of membrane	DMPK coiled coil domain like
gene-LOC110692648	1.46	1.56	1.81	0.38	0.23	0.42	111	116	135	27	17	31	0.182	-2.456	1.13221e-10	9.49338e-09	down	NW_018744124.1	378693	383544	+	LOC110692648	--	--	--	--	--	--	--	--
gene-LOC110692681	4.95	6.62	2.64	1.81	0.58	1.23	229	301	120	78	26	55	0.205	-2.289	0.000143965	0.0034951	down	NW_018744128.1	432363	435326	-	LOC110692681	--	K20181 vacuolar protein sorting-associated protein 18 | (RefSeq) vacuolar sorting-associated-like protein (A)	receptor kinase-like protein Xa21 [Chenopodium quinoa]	RecName: Full=Receptor kinase-like protein Xa21 {ECO:0000303|Ref.1}; EC=2.7.11.1 {ECO:0000255|PROSITE-ProRule:PRU00159, ECO:0000269|PubMed:11927577}; Contains: RecName: Full=Receptor kinase-like protein Xa21, processed {ECO:0000250|UniProtKB:Q2R2D5}; Flags: Precursor;	SubName: Full=Uncharacterized protein {ECO:0000313|EMBL:KMS99691.1};	--	GO:0005789,endoplasmic reticulum membrane; GO:0016021,integral component of membrane; GO:0005634,nucleus; GO:0005886,plasma membrane; GO:0005524,ATP binding; GO:0004674,protein serine/threonine kinase activity; GO:0006952,defense response; GO:0031349,positive regulation of defense response; GO:1900426,positive regulation of defense response to bacterium; GO:0046777,protein autophosphorylation	Protein kinase domain
gene-LOC110692905	0.32	0.38	0.62	0	0.03	0	11	13	21	0	1	0	0.021	-5.558	5.52426e-05	0.00154968	down	NW_018744136.1	30407	34187	+	LOC110692905	--	K21435 ankyrin repeat domain-containing protein 6 | (RefSeq) espin (A)	ankyrin repeat-containing protein ITN1-like [Chenopodium quinoa]	RecName: Full=Ankyrin repeat-containing protein ITN1; AltName: Full=Protein INCREASED TOLERANCE TO NACL {ECO:0000303|PubMed:18643991};	SubName: Full=Uncharacterized protein {ECO:0000313|EMBL:KMS94826.1};	FOG: Ankyrin repeat	GO:0016021,integral component of membrane; GO:0005634,nucleus; GO:0005886,plasma membrane; GO:0034613,cellular protein localization; GO:0009651,response to salt stress; GO:0007165,signal transduction	Domain of unknown function
gene-LOC110692915	3.86	10.32	0.8	0.51	0.35	0.46	113	297	23	14	10	13	0.066	-3.924	6.2882e-06	0.000224552	down	NW_018744137.1	180247	181712	+	LOC110692915	--	K01183 chitinase [EC:3.2.1.14] | (RefSeq) acidic endochitinase SE2-like (A)	acidic endochitinase SE2-like [Chenopodium quinoa]	RecName: Full=Acidic endochitinase SE2; EC=3.2.1.14; Flags: Precursor;	SubName: Full=Uncharacterized protein {ECO:0000313|EMBL:KMT16484.1};	Chitinase	GO:0005615,extracellular space; GO:0004568,chitinase activity; GO:0006032,chitin catabolic process; GO:0000272,polysaccharide catabolic process	Glycosyl hydrolases family 18
gene-LOC110692966	1.49	1.44	3.28	0.8	1.24	0.99	42	40	91	21	34	27	0.426	-1.231	0.00214822	0.0331212	down	NW_018742334.1	1055993	1061164	-	LOC110692966	--	--	--	--	--	--	--	--
gene-LOC110692978	30.93	38.51	14.32	14.03	8.62	8.24	542	663	247	229	147	140	0.291	-1.782	0.000599454	0.0118674	down	NW_018744137.1	819832	821835	+	LOC110692978	--	K11968 ariadne-1 [EC:2.3.2.31] | (RefSeq) probable E3 ubiquitin-protein ligase ARI2 isoform X1 (A)	non-symbiotic hemoglobin 2-like [Chenopodium quinoa]	RecName: Full=Non-symbiotic hemoglobin 2; AltName: Full=Hb2; AltName: Full=SOLly GLB2;	SubName: Full=Non-symbiotic hemoglobin class 2 {ECO:0000313|EMBL:AHB20279.1};	Globins and related hemoproteins	GO:0020037,heme binding; GO:0046872,metal ion binding; GO:0019825,oxygen binding; GO:0006631,fatty acid metabolic process; GO:0019432,triglyceride biosynthetic process	Globin
gene-LOC110692989	11.82	8.94	12.41	4.96	9.29	5.11	179	133	185	70	137	75	0.486	-1.041	0.000509621	0.010341	down	NW_018744137.1	933900	936996	+	LOC110692989	--	--	stress-response A/B barrel domain-containing protein HS1-like [Chenopodium quinoa]	RecName: Full=Stress-response A/B barrel domain-containing protein HS1 {ECO:0000305}; AltName: Full=Pop3 family protein At3g17210 {ECO:0000305}; AltName: Full=Protein HEAT STABLE 1 {ECO:0000303|PubMed:17720140}; Short=AtHS1 {ECO:0000303|PubMed:17720140};	SubName: Full=Uncharacterized protein {ECO:0000313|EMBL:KNA25561.1};	--	GO:0005829,cytosol; GO:0005886,plasma membrane; GO:0046872,metal ion binding; GO:0042742,defense response to bacterium; GO:0050832,defense response to fungus	Stress responsive A/B Barrel Domain
gene-LOC110693087	0.95	3.53	0.91	0	0	0	17	62	16	0	0	0	0.005	-7.775	2.47856e-07	1.16483e-05	down	NW_018744137.1	158391	172876	+	LOC110693087	--	--	--	--	--	--	--	--
gene-LOC110693111	0.51	1.16	0.06	0	0	0	9	20	1	0	0	0	0.014	-6.151	0.00109099	0.0192808	down	NW_018742334.1	1211305	1212943	-	LOC110693111	--	--	uncharacterized protein LOC110693111 [Chenopodium quinoa]	RecName: Full=Jasmonate-induced protein homolog;	SubName: Full=Uncharacterized protein {ECO:0000313|EMBL:KNA05789.1};	--	--	--
gene-LOC110693125	0.54	0.5	1.25	0.16	0.15	0	11	10	25	3	3	0	0.117	-3.09	0.00108661	0.0192569	down	NW_018744137.1	943682	946143	+	LOC110693125	--	--	--	--	--	--	--	--
gene-LOC110693132	2.73	9.25	0.11	0.23	0.27	0.27	52	173	2	4	5	5	0.046	-4.444	0.000153835	0.00369933	down	NW_018742334.1	1220184	1230840	-	LOC110693132	--	--	jasmonate-induced protein homolog [Chenopodium quinoa]	RecName: Full=Jasmonate-induced protein homolog;	SubName: Full=Uncharacterized protein {ECO:0000313|EMBL:KNA11535.1};	--	--	--
gene-LOC110693137	10.41	12.04	9.36	4.94	6.6	7.54	235	267	208	104	145	165	0.492	-1.023	0.00339706	0.0472992	down	NW_018744143.1	24586	25715	-	LOC110693137	--	--	uncharacterized protein LOC110693137 [Chenopodium quinoa]	--	SubName: Full=Uncharacterized protein {ECO:0000313|EMBL:KNA08342.1};	--	--	Domain of unknown function (DUF1995)
gene-LOC110693142	1.85	5.12	0.4	0.45	0.18	0.48	75	204	16	17	7	19	0.114	-3.129	0.000621693	0.0122305	down	NW_018744143.1	82157	84462	-	LOC110693142	--	K13993 HSP20 family protein | (RefSeq) 18.1 kDa class I heat shock protein-like (A)	21.7 kDa class VI heat shock protein-like isoform X1 [Chenopodium quinoa]	RecName: Full=21.7 kDa class VI heat shock protein; AltName: Full=21.7 kDa heat shock protein; Short=AtHsp21.7;	SubName: Full=Uncharacterized protein {ECO:0000313|EMBL:GAY54777.1};	--	GO:0005737,cytoplasm	Hsp20/alpha crystallin family
gene-LOC110693421	0.13	0.15	0.07	0	0	0	8	9	4	0	0	0	0.022	-5.531	0.000911776	0.0167593	down	NW_018744151.1	30036	33804	-	LOC110693421	--	K06883 uncharacterized protein | (RefSeq) LOW QUALITY PROTEIN: uncharacterized protein LOC104799061 (A)	putative receptor-like protein kinase At4g00960 [Chenopodium quinoa]	RecName: Full=Cysteine-rich receptor-like protein kinase 10; Short=Cysteine-rich RLK10; EC=2.7.11.-; AltName: Full=Receptor-like protein kinase 4; Flags: Precursor;	SubName: Full=Uncharacterized protein {ECO:0000313|EMBL:BAT93993.1};	--	GO:0016021,integral component of membrane; GO:0005886,plasma membrane; GO:0005524,ATP binding; GO:0004674,protein serine/threonine kinase activity; GO:0042742,defense response to bacterium; GO:0006468,protein phosphorylation	Protein kinase domain
gene-LOC110693422	0.51	0.78	0.36	0	0.05	0.06	35	52	24	0	3	4	0.051	-4.286	1.05083e-06	4.43973e-05	down	NW_018744151.1	25602	29598	-	LOC110693422	--	K06883 uncharacterized protein | (RefSeq) LOW QUALITY PROTEIN: uncharacterized protein LOC104799061 (A)	putative receptor-like protein kinase At4g00960 isoform X1 [Chenopodium quinoa]	RecName: Full=Cysteine-rich receptor-like protein kinase 10; Short=Cysteine-rich RLK10; EC=2.7.11.-; AltName: Full=Receptor-like protein kinase 4; Flags: Precursor;	SubName: Full=Uncharacterized protein {ECO:0000313|EMBL:BAT93993.1};	--	GO:0016021,integral component of membrane; GO:0005886,plasma membrane; GO:0005524,ATP binding; GO:0004674,protein serine/threonine kinase activity; GO:0042742,defense response to bacterium; GO:0006468,protein phosphorylation	Protein kinase domain
gene-LOC110693427	1.66	6.43	1.55	0.61	0.35	0.77	73	278	67	25	15	33	0.14	-2.84	0.000116659	0.0029197	down	NW_018744151.1	147584	152011	-	LOC110693427	--	--	--	--	--	--	--	--
gene-LOC110693442	1.88	6.24	1.39	0.55	0.51	0.53	121	394	88	33	32	33	0.127	-2.974	1.02552e-05	0.000351699	down	NW_018744151.1	189052	193980	-	LOC110693442	--	K06883 uncharacterized protein | (RefSeq) LOW QUALITY PROTEIN: uncharacterized protein LOC104799061 (A)	cysteine-rich receptor-like protein kinase 15 [Chenopodium quinoa]	RecName: Full=Cysteine-rich receptor-like protein kinase 25; Short=Cysteine-rich RLK25; EC=2.7.11.-; Flags: Precursor;	SubName: Full=Uncharacterized protein {ECO:0000313|EMBL:CAN74851.1};	--	GO:0016021,integral component of membrane; GO:0005886,plasma membrane; GO:0005524,ATP binding; GO:0004674,protein serine/threonine kinase activity; GO:0042742,defense response to bacterium; GO:0006468,protein phosphorylation	Protein kinase domain
gene-LOC110693443	0.85	1.92	0.37	0	0	0	35	78	15	0	0	0	0.003	-8.211	2.97019e-08	1.66163e-06	down	NW_018744151.1	154828	157879	-	LOC110693443	--	--	--	--	--	--	--	--
gene-LOC110693444	1.07	1.18	0.48	0.2	0.13	0.36	52	56	23	9	6	17	0.204	-2.292	0.000938487	0.0171757	down	NW_018744151.1	245811	249560	+	LOC110693444	--	K20606 mitogen-activated protein kinase kinase kinase ANP1 [EC:2.7.11.25] | (RefSeq) receptor-like serine/threonine-protein kinase SD1-7 isoform X1 (A)	cysteine-rich receptor-like protein kinase 7 [Chenopodium quinoa]	RecName: Full=Cysteine-rich receptor-like protein kinase 25; Short=Cysteine-rich RLK25; EC=2.7.11.-; Flags: Precursor;	SubName: Full=Uncharacterized protein {ECO:0000313|EMBL:KDP20812.1};	--	GO:0016021,integral component of membrane; GO:0005886,plasma membrane; GO:0005524,ATP binding; GO:0004674,protein serine/threonine kinase activity; GO:0042742,defense response to bacterium; GO:0006468,protein phosphorylation	Protein tyrosine kinase
gene-LOC110693446	0.86	0.36	0.32	0.04	0.04	0.04	22	9	8	1	1	1	0.065	-3.936	0.000678136	0.0131172	down	NW_018744151.1	244046	245331	+	LOC110693446	--	--	cysteine-rich repeat secretory protein 38-like [Chenopodium quinoa]	RecName: Full=Cysteine-rich receptor-like protein kinase 26; Short=Cysteine-rich RLK26; EC=2.7.11.-; Flags: Precursor;	SubName: Full=Uncharacterized protein {ECO:0000313|EMBL:KNA14734.1};	--	GO:0016021,integral component of membrane; GO:0005886,plasma membrane; GO:0005524,ATP binding; GO:0004674,protein serine/threonine kinase activity; GO:0042742,defense response to bacterium; GO:0006468,protein phosphorylation	Salt stress response/antifungal
gene-LOC110693462	2.43	1.67	4.21	0.02	0.25	0	120	81	205	1	12	0	0.027	-5.189	1.11524e-10	9.39245e-09	down	NW_018744151.1	505519	528808	-	LOC110693462	--	K14175 (3S,6E)-nerolidol synthase [EC:4.2.3.48] | (RefSeq) (3S,6E)-nerolidol synthase 1-like (A)	(3S,6E)-nerolidol synthase 1-like [Chenopodium quinoa]	RecName: Full=(3S,6E)-nerolidol synthase 1; Short=FaNES1; EC=4.2.3.48;	SubName: Full=Uncharacterized protein {ECO:0000313|EMBL:KMT04064.1};	--	GO:0005829,cytosol; GO:0000287,magnesium ion binding; GO:0010333,terpene synthase activity; GO:0016114,terpenoid biosynthetic process	Terpene synthase family, metal binding domain
gene-LOC110693488	1.15	0.76	0.98	0.49	0.55	0.49	75	49	63	30	35	31	0.445	-1.167	0.000852471	0.0158143	down	NW_018744151.1	961416	965287	-	LOC110693488	--	--	--	--	--	--	--	--
gene-LOC110693610	1.1	0.41	2.38	0.2	0.46	0.31	47	17	100	8	19	13	0.227	-2.137	0.000639451	0.0124895	down	NW_018744151.1	3096950	3100929	-	LOC110693610	--	K17710 pentatricopeptide repeat domain-containing protein 1 | (RefSeq) pentatricopeptide repeat-containing protein At2g18940, chloroplastic-like isoform X1 (A)	pentatricopeptide repeat-containing protein At4g21705, mitochondrial-like [Chenopodium quinoa]	RecName: Full=Pentatricopeptide repeat-containing protein At4g21705, mitochondrial; Flags: Precursor;	SubName: Full=Uncharacterized protein {ECO:0000313|EMBL:KNA11298.1};	FOG: PPR repeat	GO:0043231,intracellular membrane-bounded organelle; GO:0005739,mitochondrion; GO:0004519,endonuclease activity; GO:0003723,RNA binding; GO:0009451,RNA modification	PPR repeat family
gene-LOC110693637	11	9.53	12.23	2.27	2.52	1.76	296	252	324	57	66	46	0.168	-2.574	3.71697e-27	2.82988e-24	down	NW_018744151.1	3629436	3635840	-	LOC110693637	--	--	--	--	--	--	--	--
gene-LOC110693814	15.31	25.4	10.02	1.52	2.15	2.72	564	919	363	52	77	97	0.099	-3.335	7.28682e-11	6.23342e-09	down	NW_018744167.1	652475	670492	+	LOC110693814	--	K12867 pre-mRNA-splicing factor SYF1 | (RefSeq) hypothetical protein (A)	probable inactive purple acid phosphatase 29 [Chenopodium quinoa]	RecName: Full=Probable inactive purple acid phosphatase 29; Flags: Precursor;	SubName: Full=Uncharacterized protein {ECO:0000313|EMBL:KDP28382.1};	Predicted DNA repair exonuclease SIA1	GO:0005576,extracellular region; GO:0003993,acid phosphatase activity; GO:0046872,metal ion binding	Calcineurin-like phosphoesterase
gene-LOC110693959	4.83	2.53	1.74	0.08	0	0	62	32	22	1	0	0	0.008	-7.006	2.84461e-07	1.32217e-05	down	NW_018742345.1	664503	665228	-	LOC110693959	--	--	--	--	--	--	--	--
gene-LOC110694096	23.87	25.81	7.41	2.3	2.39	2.23	1025	1089	313	92	100	93	0.094	-3.407	5.13166e-10	3.84556e-08	down	NW_018744239.1	1317582	1325185	-	LOC110694096	--	K23809 cytochrome P450 family 72 subfamily A polypeptide 68 | (GenBank) cytochrome P450 family 709 protein (A)	cytochrome P450 CYP72A219-like [Chenopodium quinoa]	RecName: Full=Cytochrome P450 CYP72A219; EC=1.14.-.-; AltName: Full=Cytochrome P450 CYP72A129;	SubName: Full=Uncharacterized protein {ECO:0000313|EMBL:KNA06618.1};	Cytochrome P450 CYP4/CYP19/CYP26 subfamilies	GO:0016021,integral component of membrane; GO:0020037,heme binding; GO:0005506,iron ion binding; GO:0004497,monooxygenase activity; GO:0016705,oxidoreductase activity, acting on paired donors, with incorporation or reduction of molecular oxygen	Cytochrome P450
gene-LOC110694097	0.53	3.34	0.51	0.25	0.18	0.27	18	111	17	8	6	9	0.122	-3.036	0.00102124	0.0183375	down	NW_018744239.1	1358171	1369927	-	LOC110694097	--	--	--	--	--	--	--	--
gene-LOC110694102	0.11	0.05	0.13	0	0.01	0	19	8	23	0	2	0	0.035	-4.826	0.000165138	0.00393632	down	NW_018744239.1	1606220	1620537	+	LOC110694102	--	K17086 transmembrane 9 superfamily member 2/4 | (RefSeq) uncharacterized LOC101300290 (A)	uncharacterized protein LOC110694102 [Chenopodium quinoa]	--	SubName: Full=Uncharacterized protein {ECO:0000313|EMBL:CAN65999.1};	--	GO:0008270,zinc ion binding	MULE transposase domain
gene-LOC110694117	92.36	187.9	37.39	24.35	9.96	38.44	3038	6072	1210	746	319	1225	0.18	-2.472	0.000586689	0.0116807	down	NW_018744239.1	2065057	2066702	-	LOC110694117	--	K01381 saccharopepsin [EC:3.4.23.25] | (RefSeq) aspartic proteinase CDR1-like (A)	aspartic proteinase CDR1-like [Chenopodium quinoa]	RecName: Full=Aspartic proteinase CDR1; EC=3.4.23.-; AltName: Full=Protein CONSTITUTIVE DISEASE RESISTANCE 1; Flags: Precursor;	SubName: Full=Uncharacterized protein {ECO:0000313|EMBL:KNA06676.1};	Aspartyl protease	GO:0048046,apoplast; GO:0004190,aspartic-type endopeptidase activity; GO:0042742,defense response to bacterium; GO:0030163,protein catabolic process; GO:0010310,regulation of hydrogen peroxide metabolic process; GO:0010337,regulation of salicylic acid metabolic process	Xylanase inhibitor N-terminal
gene-LOC110694119	12.94	22.07	5.03	2.83	1.9	3.82	392	657	150	80	56	112	0.167	-2.583	5.22898e-05	0.00147664	down	NW_018744239.1	2071675	2075454	-	LOC110694119	--	K01381 saccharopepsin [EC:3.4.23.25] | (RefSeq) aspartic proteinase CDR1-like (A)	aspartic proteinase CDR1-like [Chenopodium quinoa]	RecName: Full=Aspartic proteinase CDR1; EC=3.4.23.-; AltName: Full=Protein CONSTITUTIVE DISEASE RESISTANCE 1; Flags: Precursor;	SubName: Full=Uncharacterized protein {ECO:0000313|EMBL:KNA06676.1};	Aspartyl protease	GO:0048046,apoplast; GO:0004190,aspartic-type endopeptidase activity; GO:0042742,defense response to bacterium; GO:0030163,protein catabolic process; GO:0010310,regulation of hydrogen peroxide metabolic process; GO:0010337,regulation of salicylic acid metabolic process	Xylanase inhibitor N-terminal
gene-LOC110694120	3.14	9.08	0.96	0.18	0.06	0.11	113	321	34	6	2	4	0.02	-5.643	1.40056e-09	9.64109e-08	down	NW_018744239.1	2078610	2080410	-	LOC110694120	--	K01381 saccharopepsin [EC:3.4.23.25] | (RefSeq) aspartic proteinase CDR1-like (A)	aspartic proteinase CDR1-like [Chenopodium quinoa]	RecName: Full=Aspartic proteinase CDR1; EC=3.4.23.-; AltName: Full=Protein CONSTITUTIVE DISEASE RESISTANCE 1; Flags: Precursor;	SubName: Full=Uncharacterized protein {ECO:0000313|EMBL:KNA06676.1};	Aspartyl protease	GO:0048046,apoplast; GO:0004190,aspartic-type endopeptidase activity; GO:0042742,defense response to bacterium; GO:0030163,protein catabolic process; GO:0010310,regulation of hydrogen peroxide metabolic process; GO:0010337,regulation of salicylic acid metabolic process	Xylanase inhibitor N-terminal
gene-LOC110694122	11.5	20.45	9.87	4.2	4.38	8.05	391	683	330	133	145	265	0.321	-1.642	0.0011857	0.0206573	down	NW_018744239.1	2088018	2089718	-	LOC110694122	--	K01381 saccharopepsin [EC:3.4.23.25] | (RefSeq) aspartic proteinase CDR1-like (A)	aspartic proteinase CDR1-like [Chenopodium quinoa]	RecName: Full=Aspartic proteinase CDR1; EC=3.4.23.-; AltName: Full=Protein CONSTITUTIVE DISEASE RESISTANCE 1; Flags: Precursor;	SubName: Full=Uncharacterized protein {ECO:0000313|EMBL:KNA06676.1};	Aspartyl protease	GO:0048046,apoplast; GO:0004190,aspartic-type endopeptidase activity; GO:0042742,defense response to bacterium; GO:0030163,protein catabolic process; GO:0010310,regulation of hydrogen peroxide metabolic process; GO:0010337,regulation of salicylic acid metabolic process	Xylanase inhibitor N-terminal
gene-LOC110694144	1.4	4.32	0.12	0.04	0.04	0.33	35	106	3	1	1	8	0.054	-4.21	0.000947206	0.017302	down	NW_018744239.1	2700365	2701947	+	LOC110694144	--	--	uncharacterized protein LOC110694144 [Chenopodium quinoa]	--	SubName: Full=Uncharacterized protein {ECO:0000313|EMBL:KMS95661.1};	--	--	--
gene-LOC110694153	5.36	5.59	5.47	0	0	0	245	251	246	0	0	0	0.001	-10.617	3.66778e-18	9.18562e-16	down	NW_018742345.1	2800240	2808611	+	LOC110694153	--	K10746 exonuclease 1 [EC:3.1.-.-] | (RefSeq) exonuclease 1-like (A)	exonuclease 1-like [Chenopodium quinoa]	RecName: Full=Exonuclease 1; EC=3.1.-.-;	SubName: Full=Uncharacterized protein {ECO:0000313|EMBL:KNA19257.1};	5'-3' exonuclease	GO:0005634,nucleus; GO:0035312,5'-3' exodeoxyribonuclease activity; GO:0003677,DNA binding; GO:0004519,endonuclease activity; GO:0046872,metal ion binding; GO:0006281,DNA repair	XPG N-terminal domain
gene-LOC110694170	9.72	8.47	13.36	0	0	0	621	532	840	0	0	0	0	-11.997	1.26309e-23	6.49755e-21	down	NW_018742345.1	3208797	3213827	+	LOC110694170	--	K15042 importin subunit alpha-6/7 | (RefSeq) importin subunit alpha-4-like (A)	uncharacterized protein LOC110694170 isoform X1 [Chenopodium quinoa]	--	SubName: Full=Uncharacterized protein {ECO:0000313|EMBL:KMT08054.1};	--	--	--
gene-LOC110694185	42.39	37.46	45.18	9.81	10.84	10.85	1169	1015	1226	252	291	290	0.212	-2.239	1.2453e-29	1.07739e-26	down	NW_018744239.1	3251245	3255959	-	LOC110694185	--	K19042 E3 ubiquitin-protein ligase BOI and related proteins [EC:2.3.2.27] | (RefSeq) LOW QUALITY PROTEIN: E3 ubiquitin-protein ligase BOI-like (A)	LOW QUALITY PROTEIN: E3 ubiquitin-protein ligase BOI-like [Chenopodium quinoa]	RecName: Full=Probable BOI-related E3 ubiquitin-protein ligase 2; EC=2.3.2.27 {ECO:0000250|UniProtKB:Q9FHE4}; AltName: Full=RING-type E3 ubiquitin transferase BRG2 {ECO:0000305};	SubName: Full=Uncharacterized protein {ECO:0000313|EMBL:KNA13187.1}; Flags: Fragment;	Predicted E3 ubiquitin ligase	GO:0046872,metal ion binding; GO:0016740,transferase activity; GO:0006952,defense response; GO:0043161,proteasome-mediated ubiquitin-dependent protein catabolic process; GO:0043067,regulation of programmed cell death	Zinc finger, C3HC4 type (RING finger)
gene-LOC110694186	9.86	9.14	15.24	0.89	1.33	1.05	213	194	324	18	28	22	0.082	-3.608	6.69032e-36	1.01872e-32	down	NW_018744239.1	3255999	3257431	-	LOC110694186	--	--	--	--	--	--	--	--
gene-LOC110694242	3.33	4.58	3.95	2.52	2.36	1.79	71	96	83	50	49	37	0.463	-1.112	0.00232021	0.0352448	down	NW_018744239.1	4782051	4784364	-	LOC110694242	--	--	uncharacterized protein LOC110694242 [Chenopodium quinoa]	--	SubName: Full=Uncharacterized protein {ECO:0000313|EMBL:KNA19852.1};	--	GO:0016021,integral component of membrane	--
gene-LOC110694406	0.73	1.48	1.91	0	0	0	12	24	31	0	0	0	0.007	-7.111	2.71345e-07	1.2674e-05	down	NW_018742204.1	17421447	17422271	+	LOC110694406	--	K19027 zinc finger FYVE domain-containing protein 26 | (RefSeq) hypothetical protein (A)	disease resistance response protein 206-like [Chenopodium quinoa]	RecName: Full=Disease resistance response protein 206; AltName: Full=Dirigent protein PI206; Flags: Precursor;	RecName: Full=Dirigent protein {ECO:0000256|RuleBase:RU363099};	--	GO:0048046,apoplast; GO:0016853,isomerase activity; GO:0006952,defense response; GO:0009607,response to biotic stimulus	Dirigent-like protein
gene-LOC110694407	0.16	0.28	0.78	0	0	0	11	19	53	0	0	0	0.006	-7.332	2.85217e-07	1.32407e-05	down	NW_018742345.1	4667448	4673622	+	LOC110694407	--	--	uncharacterized protein LOC110694407 [Chenopodium quinoa]	--	SubName: Full=Uncharacterized protein {ECO:0000313|EMBL:KNA25579.1}; Flags: Fragment;	--	--	--
gene-LOC110694410	0.82	0.67	0.95	0.29	0.28	0.2	21	17	24	7	7	5	0.268	-1.901	0.000997081	0.0180399	down	NW_018744239.1	6844624	6848090	+	LOC110694410	--	--	--	--	--	--	--	--
gene-LOC110694434	73.3	128.86	35.51	28.7	20.78	17.01	1330	2297	634	485	367	299	0.216	-2.213	7.93851e-05	0.00209277	down	NW_018744239.1	7530631	7532570	-	LOC110694434	--	--	NAD(P)H-quinone oxidoreductase subunit L, chloroplastic-like [Chenopodium quinoa]	RecName: Full=NAD(P)H-quinone oxidoreductase subunit L, chloroplastic; EC=1.6.5.- {ECO:0000305}; AltName: Full=NAD(P)H dehydrogenase subunit L {ECO:0000303|PubMed:21785130}; Short=NDH subunit L {ECO:0000305}; Short=NDH-L {ECO:0000305}; AltName: Full=NADH-plastoquinone oxidoreductase subunit L {ECO:0000305}; AltName: Full=Protein CHLORORESPIRATORY REDUCTION 23 {ECO:0000303|PubMed:18388109}; Flags:…	SubName: Full=Uncharacterized protein {ECO:0000313|EMBL:KNA17248.1};	--	GO:0009535,chloroplast thylakoid membrane; GO:0016021,integral component of membrane; GO:0010598,NAD(P)H dehydrogenase complex (plastoquinone); GO:0042651,thylakoid membrane; GO:0016655,oxidoreductase activity, acting on NAD(P)H, quinone or similar compound as acceptor; GO:0048038,quinone binding; GO:0010258,NADH dehydrogenase complex (plastoquinone) assembly; GO:0009773,photosynthetic electron t…	NADH dehydrogenase transmembrane subunit
gene-LOC110694460	4.05	2.83	3.92	2.51	1.58	1.87	147	101	140	85	56	66	0.471	-1.085	0.00103445	0.0184875	down	NW_018744239.1	8899289	8903757	-	LOC110694460	--	--	--	--	--	--	--	--
gene-LOC110694518	1.16	0.95	1.06	0	0	0	10	8	9	0	0	0	0.018	-5.823	0.000120389	0.00299336	down	NW_018744239.1	663153	664188	-	LOC110694518	--	--	--	--	--	--	--	--
gene-LOC110694523	58.62	52.67	53.92	38.67	17.63	29.27	895	790	810	550	262	433	0.438	-1.19	0.00186628	0.0297753	down	NW_018744239.1	1661028	1662287	+	LOC110694523	--	K10781 fatty acyl-ACP thioesterase B [EC:3.1.2.14 3.1.2.21] | (RefSeq) uncharacterized protein LOC113347984 isoform X1 (A)	MLP-like protein 423 [Chenopodium quinoa]	RecName: Full=MLP-like protein 423;	SubName: Full=Uncharacterized protein {ECO:0000313|EMBL:KNA24457.1};	--	GO:0016020,membrane; GO:0006952,defense response; GO:0009607,response to biotic stimulus	Pathogenesis-related protein Bet v I family
gene-LOC110694528	2.8	2.89	2.19	1.42	1.68	1.46	91	92	70	43	53	46	0.473	-1.081	0.00342203	0.0475772	down	NW_018744239.1	2043875	2045498	-	LOC110694528	--	K01381 saccharopepsin [EC:3.4.23.25] | (RefSeq) aspartic proteinase CDR1-like (A)	aspartic proteinase CDR1-like [Chenopodium quinoa]	RecName: Full=Aspartic proteinase CDR1; EC=3.4.23.-; AltName: Full=Protein CONSTITUTIVE DISEASE RESISTANCE 1; Flags: Precursor;	SubName: Full=Uncharacterized protein {ECO:0000313|EMBL:KNA18019.1}; Flags: Fragment;	Aspartyl protease	GO:0048046,apoplast; GO:0004190,aspartic-type endopeptidase activity; GO:0042742,defense response to bacterium; GO:0030163,protein catabolic process; GO:0010310,regulation of hydrogen peroxide metabolic process; GO:0010337,regulation of salicylic acid metabolic process	Xylanase inhibitor N-terminal
gene-LOC110694535	5.57	11.86	0.91	0	0.53	0.15	75	157	12	0	7	2	0.027	-5.224	4.01168e-06	0.00015016	down	NW_018744239.1	2657844	2658851	+	LOC110694535	--	--	--	--	--	--	--	--
gene-LOC110694536	8.96	48	0.32	0	0.08	0.08	115	605	4	0	1	1	0.002	-8.967	1.29749e-05	0.000435933	down	NW_018744239.1	2691088	2692042	-	LOC110694536	--	--	uncharacterized protein LOC110694148 [Chenopodium quinoa]	RecName: Full=60 kDa jasmonate-induced protein; EC=3.2.2.22; AltName: Full=rRNA N-glycosidase;	SubName: Full=Uncharacterized protein {ECO:0000313|EMBL:KMT11885.1};	--	GO:0030598,rRNA N-glycosylase activity; GO:0090729,toxin activity; GO:0006952,defense response; GO:0017148,negative regulation of translation	--
gene-LOC110694700	0.51	1.95	1.15	0.18	0	0	9	34	20	3	0	0	0.04	-4.635	0.000231043	0.00524769	down	NW_018744240.1	837250	846332	-	LOC110694700	--	--	uncharacterized protein LOC110694700 [Chenopodium quinoa]	--	SubName: Full=Uncharacterized protein {ECO:0000313|EMBL:KNA16894.1};	--	GO:0016021,integral component of membrane	Small subunit of serine palmitoyltransferase-like
gene-LOC110694701	2.37	2.51	3.34	0	0	0	118	123	164	0	0	0	0.001	-9.712	1.59966e-15	2.60231e-13	down	NW_018744240.1	847326	853104	+	LOC110694701	--	K10772 AP endonuclease 2 [EC:4.2.99.18] | (RefSeq) DNA-(apurinic or apyrimidinic site) lyase 2-like isoform X1 (A)	DNA-(apurinic or apyrimidinic site) lyase 2-like isoform X1 [Chenopodium quinoa]	RecName: Full=DNA-(apurinic or apyrimidinic site) lyase 2 {ECO:0000303|PubMed:19172180}; EC=4.2.99.18 {ECO:0000269|PubMed:25569774}; AltName: Full=Apurinic-apyrimidinic endonuclease 2;	SubName: Full=Uncharacterized protein {ECO:0000313|EMBL:KNA19961.1};	Apurinic/apyrimidinic endonuclease and related enzymes	GO:0005634,nucleus; GO:0140078,class I DNA-(apurinic or apyrimidinic site) endonuclease activity; GO:0140080,class III/IV DNA-(apurinic or apyrimidinic site) endonuclease activity; GO:0003906,DNA-(apurinic or apyrimidinic site) endonuclease activity; GO:0008311,double-stranded DNA 3'-5' exodeoxyribonuclease activity; GO:0004519,endonuclease activity; GO:0008270,zinc ion binding; GO:0006284,base-e…	Endonuclease/Exonuclease/phosphatase family
gene-LOC110694838	8.33	10.36	7.98	3.57	3.69	3.46	283	346	267	113	122	114	0.328	-1.606	4.74358e-07	2.11445e-05	down	NW_018744251.1	107844	134189	+	LOC110694838	--	K00981 phosphatidate cytidylyltransferase [EC:2.7.7.41] | (RefSeq) phosphatidate cytidylyltransferase 4, chloroplastic-like isoform X1 (A)	phosphatidate cytidylyltransferase 4, chloroplastic-like isoform X1 [Chenopodium quinoa]	RecName: Full=Phosphatidate cytidylyltransferase 4, chloroplastic {ECO:0000303|PubMed:20442275}; EC=2.7.7.41 {ECO:0000269|PubMed:20442275}; AltName: Full=CDP-DAG synthase 4; AltName: Full=CDP-DG synthase 4; AltName: Full=CDP-diacylglycerol synthase 4; Short=CDS4; AltName: Full=CDP-diglyceride pyrophosphorylase 4; AltName: Full=CDP-diglyceride synthase 4; AltName: Full=CTP:phosphatidate cytidylylt…	RecName: Full=Phosphatidate cytidylyltransferase {ECO:0000256|RuleBase:RU003938}; EC=2.7.7.41 {ECO:0000256|RuleBase:RU003938};	CDP-diacylglycerol synthase	GO:0031969,chloroplast membrane; GO:0009535,chloroplast thylakoid membrane; GO:0016021,integral component of membrane; GO:0009536,plastid; GO:0004605,phosphatidate cytidylyltransferase activity; GO:0016024,CDP-diacylglycerol biosynthetic process; GO:0006655,phosphatidylglycerol biosynthetic process	Cytidylyltransferase family
gene-LOC110694953	2.61	2.26	3.05	0	0	0	134	114	154	0	0	0	0.001	-9.703	1.4986e-15	2.45893e-13	down	NW_018744284.1	828533	833553	+	LOC110694953	--	--	--	--	--	--	--	--
gene-LOC110694958	0.52	0.25	0.49	0	0	0	13	6	12	0	0	0	0.016	-5.985	6.85297e-05	0.00186071	down	NW_018744284.1	1119238	1129535	-	LOC110694958	--	--	--	--	--	--	--	--
gene-LOC110695005	0.48	0.52	0.44	0.03	0.19	0.11	32	34	29	2	12	7	0.183	-2.446	0.000153345	0.00368987	down	NW_018744284.1	3316347	3320729	-	LOC110695005	--	--	--	--	--	--	--	--
gene-LOC110695150	1.65	6.64	0.38	0.18	0.21	0.17	40	158	9	4	5	4	0.047	-4.412	1.75501e-05	0.000564258	down	NW_018744290.1	1245842	1247053	+	LOC110695150	--	--	uncharacterized protein LOC110695150 [Chenopodium quinoa]	--	SubName: Full=Uncharacterized protein {ECO:0000313|EMBL:KNA20593.1};	--	GO:0016021,integral component of membrane	--
gene-LOC110695163	6.11	6.79	5.29	3.31	2.69	3.93	196	214	167	99	84	122	0.452	-1.147	0.00185396	0.0296532	down	NW_018744290.1	1384688	1393362	+	LOC110695163	--	K11407 histone deacetylase 6 [EC:3.5.1.98] | (RefSeq) histone deacetylase 5 (A)	histone deacetylase 14-like [Chenopodium quinoa]	RecName: Full=Histone deacetylase 14; EC=3.5.1.98;	RecName: Full=Histone deacetylase {ECO:0000256|SAAS:SAAS00894283}; EC=3.5.1.98 {ECO:0000256|SAAS:SAAS00894283};	Histone deacetylase complex, catalytic component HDA1	GO:0009507,chloroplast; GO:0005829,cytosol; GO:0005634,nucleus; GO:0043014,alpha-tubulin binding; GO:0048487,beta-tubulin binding; GO:0032041,NAD-dependent histone deacetylase activity (H3-K14 specific); GO:0051721,protein phosphatase 2A binding; GO:0043621,protein self-association; GO:0042903,tubulin deacetylase activity; GO:0006355,regulation of transcription, DNA-templated; GO:0006351,transcri…	Histone deacetylase domain
gene-LOC110695283	0.62	1.03	0.4	0.06	0.16	0.21	24	39	15	2	6	8	0.166	-2.589	0.00106973	0.0190109	down	NW_018744290.1	2629797	2633099	+	LOC110695283	--	K00924 kinase [EC:2.7.1.-] | (RefSeq) aspartic proteinase-like protein 2 (A)	aspartyl protease family protein 1-like [Chenopodium quinoa]	RecName: Full=Aspartyl protease family protein 1 {ECO:0000305}; EC=3.4.23.- {ECO:0000305}; Flags: Precursor;	SubName: Full=Uncharacterized protein {ECO:0000313|EMBL:KNA06741.1}; Flags: Fragment;	Aspartyl protease	GO:0031225,anchored component of membrane; GO:0005886,plasma membrane; GO:0004190,aspartic-type endopeptidase activity; GO:0030163,protein catabolic process; GO:0006508,proteolysis	Xylanase inhibitor N-terminal
gene-LOC110695319	5.26	11.02	1.2	1.27	0.71	1.47	107	220	24	24	14	29	0.151	-2.731	0.000806785	0.0151365	down	NW_018744290.1	1255834	1256850	+	LOC110695319	--	--	uncharacterized protein LOC110695319 [Chenopodium quinoa]	--	SubName: Full=Uncharacterized protein {ECO:0000313|EMBL:EEE90367.1};	--	GO:0016021,integral component of membrane	--
gene-LOC110695402	0.27	0.36	0.41	0.04	0.06	0.18	33	43	49	5	7	21	0.233	-2.101	0.00110212	0.0194324	down	NW_018744297.1	473501	479847	-	LOC110695402	--	K15255 ATP-dependent DNA helicase PIF1 [EC:3.6.4.12] | (RefSeq) uncharacterized protein LOC110712983 (A)	uncharacterized protein LOC110695402 [Chenopodium quinoa]	--	SubName: Full=uncharacterized protein LOC109022076 {ECO:0000313|RefSeq:XP_018860421.1};	DNA helicase PIF1/RRM3	--	PIF1-like helicase
gene-LOC110695494	0.17	0.19	0.48	0.02	0.1	0.04	16	18	45	2	9	4	0.17	-2.56	0.000376073	0.00797103	down	NW_018744301.1	812043	818229	-	LOC110695494	--	--	uncharacterized protein LOC110695494 isoform X1 [Chenopodium quinoa]	--	SubName: Full=Uncharacterized protein {ECO:0000313|EMBL:KMS85024.1}; Flags: Fragment;	--	--	Plant transposase (Ptta/En/Spm family)
gene-LOC110695495	6.26	6.46	5.6	0.04	0	0	151	153	133	1	0	0	0.002	-8.902	6.35519e-13	7.33101e-11	down	NW_018744301.1	821059	824520	+	LOC110695495	--	--	--	--	--	--	--	--
gene-LOC110695528	1.44	1.72	1.7	0.05	0.08	0.03	87	102	101	3	5	2	0.029	-5.091	2.46528e-18	6.34093e-16	down	NW_018744301.1	4148847	4155312	-	LOC110695528	--	--	uncharacterized protein LOC110695528 isoform X1 [Chenopodium quinoa]	--	SubName: Full=Uncharacterized protein {ECO:0000313|EMBL:KMS85024.1}; Flags: Fragment;	--	--	Plant transposase (Ptta/En/Spm family)
gene-LOC110695531	0.44	0.49	1.62	0	0	0	11	12	40	0	0	0	0.008	-6.927	1.50462e-06	6.13896e-05	down	NW_018744301.1	4360665	4365376	+	LOC110695531	--	--	--	--	--	--	--	--
gene-LOC110695533	1.21	0.76	3.51	0.4	0.76	0.21	65	40	186	20	40	11	0.225	-2.154	0.000326708	0.00710268	down	NW_018744301.1	4684123	4690581	+	LOC110695533	--	--	putative B3 domain-containing protein At5g66980 [Chenopodium quinoa]	RecName: Full=Putative B3 domain-containing protein At5g66980;	SubName: Full=Uncharacterized protein {ECO:0000313|EMBL:OWM74464.1};	--	GO:0005634,nucleus; GO:0003677,DNA binding; GO:0006355,regulation of transcription, DNA-templated; GO:0006351,transcription, DNA-templated	B3 DNA binding domain
gene-LOC110695735	63.42	129.22	71.57	47.76	48.96	31.72	1360	2722	1510	954	1022	659	0.385	-1.378	0.00115804	0.0202681	down	NW_018744304.1	5812093	5813165	-	LOC110695735	--	K01166 ribonuclease T2 [EC:3.1.27.1] | (RefSeq) uncharacterized protein LOC111302682 (A)	protein BIC1-like [Chenopodium quinoa]	RecName: Full=Protein BIC1 {ECO:0000303|PubMed:27846570}; AltName: Full=BLUE-LIGHT INHIBITOR OF CRYPTOCHROMES 1 {ECO:0000303|PubMed:27846570};	SubName: Full=Uncharacterized protein {ECO:0000313|EMBL:KNA22867.1};	--	GO:0005634,nucleus; GO:0080167,response to karrikin	CDC45-like protein
gene-LOC110695748	3.98	4.32	1.81	0.59	0.5	1.57	123	131	55	17	15	47	0.214	-2.224	0.000729275	0.0139015	down	NW_018744304.1	6149168	6159609	-	LOC110695748	--	K02952 small subunit ribosomal protein S13 | (RefSeq) 30S ribosomal protein S13, chloroplastic-like (A)	uncharacterized protein LOC110695748 [Chenopodium quinoa]	--	SubName: Full=Uncharacterized protein {ECO:0000313|EMBL:KNA13726.1};	--	--	alpha/beta hydrolase fold
gene-LOC110695812	0.73	0.53	1.32	0	0	0	28	20	50	0	0	0	0.005	-7.61	6.27666e-09	3.89778e-07	down	NW_018744304.1	5878264	5884639	-	LOC110695812	--	--	coiled-coil domain-containing protein 96-like [Chenopodium quinoa]	--	--	--	--	--
gene-LOC110695888	40.95	49.1	32.65	11.9	11.17	14.59	1721	2027	1350	466	457	594	0.25	-1.998	2.71435e-08	1.53532e-06	down	NW_018744311.1	213594	216315	-	LOC110695888	--	K13071 pheophorbide a oxygenase [EC:1.14.15.17] | (RefSeq) pheophorbide a oxygenase, chloroplastic (A)	protochlorophyllide-dependent translocon component 52, chloroplastic-like isoform X1 [Chenopodium quinoa]	RecName: Full=Protochlorophyllide-dependent translocon component 52, chloroplastic; AltName: Full=ACD1-like protein; AltName: Full=Protein TIC 55-IV; AltName: Full=Translocon at the inner envelope membrane of chloroplasts 55-IV; Flags: Precursor;	SubName: Full=Uncharacterized protein {ECO:0000313|EMBL:KNA22695.1};	--	GO:0009507,chloroplast; GO:0009941,chloroplast envelope; GO:0009706,chloroplast inner membrane; GO:0016021,integral component of membrane; GO:0009536,plastid; GO:0051537,2 iron, 2 sulfur cluster binding; GO:0010277,chlorophyllide a oxygenase [overall] activity; GO:0046872,metal ion binding; GO:0015031,protein transport	Pheophorbide a oxygenase
gene-LOC110696049	2.06	4.16	1.07	0.43	0.26	0.34	57	113	29	11	7	9	0.109	-3.2	8.52029e-06	0.000297561	down	NW_018744311.1	1868171	1870948	-	LOC110696049	--	--	--	--	--	--	--	--
gene-LOC110696059	47.73	61.78	30.67	25.04	24.57	23.17	1860	2365	1176	909	932	875	0.413	-1.276	0.00155748	0.0257553	down	NW_018744311.1	1953615	1957546	+	LOC110696059	--	K01177 beta-amylase [EC:3.2.1.2] | (RefSeq) beta-amylase 1, chloroplastic-like (A)	beta-amylase 1, chloroplastic-like [Chenopodium quinoa]	RecName: Full=Beta-amylase 1, chloroplastic; EC=3.2.1.2; AltName: Full=1,4-alpha-D-glucan maltohydrolase; AltName: Full=Beta-amylase 7; AltName: Full=Thioredoxin-regulated beta-amylase; Short=TR-BAMY; Flags: Precursor;	RecName: Full=Beta-amylase {ECO:0000256|RuleBase:RU000509}; EC=3.2.1.2 {ECO:0000256|RuleBase:RU000509};	--	GO:0009507,chloroplast; GO:0005829,cytosol; GO:0005634,nucleus; GO:0102229,amylopectin maltohydrolase activity; GO:0016161,beta-amylase activity; GO:0009414,response to water deprivation; GO:0005983,starch catabolic process	Glycosyl hydrolase family 14
gene-LOC110696109	0.4	0.2	0.87	0	0.03	0	14	7	30	0	1	0	0.02	-5.666	7.22777e-05	0.00193514	down	NW_018744311.1	2643447	2645637	+	LOC110696109	--	K15030 translation initiation factor 3 subunit M | (RefSeq) uncharacterized protein LOC106426879 isoform X2 (A)	F-box protein CPR30-like [Chenopodium quinoa]	RecName: Full=F-box protein CPR1; AltName: Full=Protein CONSTITUTIVE EXPRESSER OF PR GENES 1; AltName: Full=Protein CONSTITUTIVE EXPRESSER OF PR GENES 30 {ECO:0000303|PubMed:19682297};	SubName: Full=Fgenesh protein 115 {ECO:0000313|EMBL:ABD83326.1};	--	GO:0005737,cytoplasm; GO:0005634,nucleus; GO:0004842,ubiquitin-protein transferase activity; GO:0031348,negative regulation of defense response; GO:0042177,negative regulation of protein catabolic process; GO:0009626,plant-type hypersensitive response; GO:0031146,SCF-dependent proteasomal ubiquitin-dependent protein catabolic process	F-box-like
gene-LOC110696240	0.41	0.31	0.29	0	0	0	16	12	11	0	0	0	0.012	-6.371	9.95416e-06	0.000342609	down	NW_018744315.1	160761	167908	-	LOC110696240	--	K01054 acylglycerol lipase [EC:3.1.1.23] | (RefSeq) uncharacterized protein LOC110809085 (A)	uncharacterized protein LOC110696240 isoform X1 [Chenopodium quinoa]	RecName: Full=Caffeoylshikimate esterase; EC=3.1.1.-; AltName: Full=Lysophospholipase 2; Short=LysoPL2;	SubName: Full=Uncharacterized protein {ECO:0000313|EMBL:KNA14431.1};	Lysophospholipase	GO:0005783,endoplasmic reticulum; GO:0005794,Golgi apparatus; GO:0005886,plasma membrane; GO:0009506,plasmodesma; GO:0003846,2-acylglycerol O-acyltransferase activity; GO:0090430,caffeoyl-CoA: alcohol caffeoyl transferase activity; GO:0016787,hydrolase activity; GO:0004622,lysophospholipase activity; GO:0009809,lignin biosynthetic process; GO:0006629,lipid metabolic process; GO:0046686,response t…	Serine aminopeptidase, S33
gene-LOC110696241	0.88	0.82	0.03	0	0	0	27	25	1	0	0	0	0.008	-6.936	0.000119264	0.00297316	down	NW_018744315.1	236995	239115	-	LOC110696241	--	K21435 ankyrin repeat domain-containing protein 6 | (RefSeq) ankyrin repeat and SAM domain-containing protein 1A isoform X1 (A)	ankyrin repeat-containing protein BDA1-like [Chenopodium quinoa]	RecName: Full=Ankyrin repeat-containing protein BDA1 {ECO:0000305}; AltName: Full=Protein BIAN DA 1 {ECO:0000303|PubMed:22740615};	SubName: Full=Uncharacterized protein {ECO:0000313|EMBL:KMS94826.1};	FOG: Ankyrin repeat	GO:0016021,integral component of membrane; GO:0005886,plasma membrane; GO:0045087,innate immune response; GO:0009751,response to salicylic acid	Ankyrin repeats (3 copies)
gene-LOC110696245	7.75	14.48	2.87	0	0	0	189	347	69	0	0	0	0.001	-10.449	7.21862e-14	9.22119e-12	down	NW_018744315.1	279970	281190	-	LOC110696245	--	K21435 ankyrin repeat domain-containing protein 6 | (RefSeq) ankyrin repeat protein (A)	uncharacterized protein LOC110696245 [Chenopodium quinoa]	--	SubName: Full=Uncharacterized protein {ECO:0000313|EMBL:KMS94826.1};	--	GO:0016021,integral component of membrane	Domain of unknown function
gene-LOC110696246	14.06	10.52	22.36	7.85	10.68	5.66	200	147	313	104	148	78	0.443	-1.173	5.15378e-05	0.00145865	down	NW_018744315.1	108748	109459	+	LOC110696246	--	--	lachrymatory-factor synthase-like [Chenopodium quinoa]	RecName: Full=Lachrymatory-factor synthase; Flags: Precursor;	SubName: Full=lachrymatory-factor synthase {ECO:0000313|RefSeq:XP_018845489.1};	--	GO:0005773,vacuole	Polyketide cyclase / dehydrase and lipid transport
gene-LOC110696497	2.19	3.76	0.76	0.81	0.71	0.63	111	187	38	38	35	31	0.244	-2.032	0.00205736	0.0320842	down	NW_018744367.1	1152923	1157625	+	LOC110696497	--	K17470 sulfate transporter 1, high-affinity | (RefSeq) sulfate transporter 1.2-like (A)	sulfate transporter 1.2-like [Chenopodium quinoa]	RecName: Full=Sulfate transporter 1.3;	SubName: Full=Uncharacterized protein {ECO:0000313|EMBL:KNA07942.1};	Sulfate/bicarbonate/oxalate exchanger SAT-1 and related transporters (SLC26 family)	GO:0005887,integral component of plasma membrane; GO:0008271,secondary active sulfate transmembrane transporter activity; GO:0015116,sulfate transmembrane transporter activity; GO:0015293,symporter activity	Sulfate permease family
gene-LOC110696759	0.13	0.17	0.27	0	0	0	4	5	8	0	0	0	0.029	-5.116	0.00257299	0.0384102	down	NW_018744367.1	671627	674220	+	LOC110696759	--	--	--	--	--	--	--	--
gene-LOC110696760	1.67	0.93	2.76	0	0	0	75	41	122	0	0	0	0.002	-8.879	2.66854e-12	2.82176e-10	down	NW_018744367.1	1019690	1023166	+	LOC110696760	--	--	--	--	--	--	--	--
gene-LOC110696761	6.35	5.53	6.41	0	0	0	138	118	137	0	0	0	0.001	-9.685	2.47219e-15	3.8728e-13	down	NW_018744367.1	1025980	1027357	+	LOC110696761	--	--	--	--	--	--	--	--
gene-LOC110696768	18.98	17.74	30.69	0	0	0	110	101	175	0	0	0	0.001	-9.618	3.33682e-15	5.08091e-13	down	NW_018744367.1	3077816	3078361	+	LOC110696768	--	--	--	--	--	--	--	--
gene-LOC110696790	5.15	7.47	6.12	0	0	0	59	84	69	0	0	0	0.002	-8.824	3.80745e-12	3.89718e-10	down	NW_018744367.1	9720263	9721247	+	LOC110696790	--	--	--	--	--	--	--	--
gene-LOC110696824	1.09	0.48	0.91	0	0	0	23	10	19	0	0	0	0.009	-6.737	1.5199e-06	6.19464e-05	down	NW_018744369.1	19627	23972	+	LOC110696824	--	--	--	--	--	--	--	--
gene-LOC110696836	45.51	24.94	59.03	0	0	0	572	308	730	0	0	0	0	-11.658	1.40217e-21	5.50273e-19	down	NW_018742372.1	1762083	1764450	+	LOC110696836	--	--	--	--	--	--	--	--
gene-LOC110696839	0.24	0.85	0.18	0	0	0.04	7	24	5	0	0	1	0.023	-5.417	0.000766677	0.0145344	down	NW_018742204.1	20994996	20996612	-	LOC110696839	--	K15503 serine/threonine-protein phosphatase 6 regulatory ankyrin repeat subunit B | (RefSeq) protein ACCELERATED CELL DEATH 6-like (A)	protein ACCELERATED CELL DEATH 6-like [Chenopodium quinoa]	RecName: Full=Protein ACCELERATED CELL DEATH 6 {ECO:0000303|PubMed:10488236};	SubName: Full=Uncharacterized protein {ECO:0000313|EMBL:KNA14726.1};	FOG: Ankyrin repeat	GO:0030176,integral component of endoplasmic reticulum membrane; GO:0005887,integral component of plasma membrane; GO:0016020,membrane; GO:0008219,cell death; GO:0071446,cellular response to salicylic acid stimulus; GO:0009816,defense response to bacterium, incompatible interaction; GO:1900426,positive regulation of defense response to bacterium; GO:1902290,positive regulation of defense response…	Ankyrin repeats (many copies)
gene-LOC110696840	0.55	0.38	0.74	0.14	0.08	0	22	15	29	5	3	0	0.108	-3.215	9.84644e-05	0.00253431	down	NW_018744369.1	1166790	1181339	+	LOC110696840	--	K00549 5-methyltetrahydropteroyltriglutamate--homocysteine methyltransferase [EC:2.1.1.14] | (RefSeq) 5-methyltetrahydropteroyltriglutamate-- homocysteine methyltransferase-like (A)	uncharacterized protein LOC110696840 [Chenopodium quinoa]	RecName: Full=5-methyltetrahydropteroyltriglutamate--homocysteine methyltransferase; EC=2.1.1.14; AltName: Full=Cobalamin-independent methionine synthase isozyme; AltName: Full=Vitamin-B12-independent methionine synthase isozyme;	SubName: Full=Uncharacterized protein {ECO:0000313|EMBL:GAY32379.1}; Flags: Fragment;	Methionine synthase II (cobalamin-independent)	GO:0005737,cytoplasm; GO:0003871,5-methyltetrahydropteroyltriglutamate-homocysteine S-methyltransferase activity; GO:0008270,zinc ion binding; GO:0009086,methionine biosynthetic process	Cobalamin-independent synthase, Catalytic domain
gene-LOC110696870	48.23	57.22	34.8	7.26	5.56	6.88	1462	1704	1038	205	164	202	0.114	-3.134	3.26591e-16	5.75571e-14	down	NW_018744394.1	273332	297855	-	LOC110696870	--	--	uncharacterized protein LOC110696870 isoform X1 [Chenopodium quinoa]	RecName: Full=CBBY-like protein {ECO:0000303|PubMed:27246049}; Short=AtCbby {ECO:0000303|PubMed:27246049}; EC=3.1.3.- {ECO:0000269|PubMed:27246049}; Flags: Precursor;	SubName: Full=Uncharacterized protein {ECO:0000313|EMBL:KMS96631.1};	--	GO:0009507,chloroplast; GO:0009941,chloroplast envelope; GO:0009570,chloroplast stroma; GO:0016787,hydrolase activity; GO:0046872,metal ion binding; GO:0008152,metabolic process	haloacid dehalogenase-like hydrolase
gene-LOC110696937	13.14	12.9	29.14	1.08	0.99	1.03	367	354	801	28	27	28	0.05	-4.329	5.62414e-38	1.0195e-34	down	NW_018744420.1	731389	738875	-	LOC110696937	--	K11153 retinol dehydrogenase 12 [EC:1.1.1.300] | (RefSeq) short-chain dehydrogenase TIC 32, chloroplastic-like (A)	short-chain dehydrogenase TIC 32, chloroplastic-like [Chenopodium quinoa]	RecName: Full=Short-chain dehydrogenase TIC 32, chloroplastic; EC=1.1.1.-; AltName: Full=Translocon at the inner envelope membrane of chloroplasts 32; Short=PsTIC32;	SubName: Full=Uncharacterized protein {ECO:0000313|EMBL:KNA09660.1};	Dehydrogenases with different specificities (related to short-chain alcohol dehydrogenases)	GO:0009706,chloroplast inner membrane; GO:0005516,calmodulin binding; GO:0016491,oxidoreductase activity; GO:0015031,protein transport	short chain dehydrogenase
gene-LOC110697008	1.12	0.74	1.23	0.55	0.48	0.62	117	76	126	53	49	63	0.46	-1.121	0.000274917	0.00608445	down	NW_018744452.1	202928	208396	+	LOC110697008	--	--	putative FBD-associated F-box protein At1g55030 isoform X1 [Chenopodium quinoa]	RecName: Full=F-box/FBD/LRR-repeat protein At1g13570;	SubName: Full=Uncharacterized protein {ECO:0000313|EMBL:KNA25374.1};	--	--	FBD
gene-LOC110697035	1.22	1.43	1.58	0.56	0.61	0.69	33	38	42	14	16	18	0.369	-1.44	0.000814693	0.0152576	down	NW_018744460.1	65744	67098	-	LOC110697035	--	K13496 UDP-glucosyl transferase 73C [EC:2.4.1.-] | (RefSeq) scopoletin glucosyltransferase (A)	uncharacterized protein LOC110697035 [Chenopodium quinoa]	--	SubName: Full=Uncharacterized protein {ECO:0000313|EMBL:KNA24299.1};	--	GO:0016021,integral component of membrane	--
gene-LOC110697038	1.11	3.02	0.41	0.33	0.22	0.22	36	96	13	10	7	7	0.129	-2.956	0.00057433	0.0114767	down	NW_018744460.1	103437	124321	-	LOC110697038	--	K19882 O-palmitoleoyl-L-serine hydrolase [EC:3.1.1.98] | (RefSeq) pectin acetylesterase 9-like (A)	pectin acetylesterase 9-like [Chenopodium quinoa]	RecName: Full=Pectin acetylesterase 9 {ECO:0000303|PubMed:25115560}; EC=3.1.1.- {ECO:0000305}; Flags: Precursor;	RecName: Full=Pectin acetylesterase {ECO:0000256|RuleBase:RU363114}; EC=3.1.1.- {ECO:0000256|RuleBase:RU363114};	Pectin acetylesterase and similar proteins	GO:0005576,extracellular region; GO:0009505,plant-type cell wall; GO:0052793,pectin acetylesterase activity; GO:0071555,cell wall organization	Pectinacetylesterase
gene-LOC110697163	168.73	139.75	126.42	76.52	117.13	63.96	2249	1830	1658	950	1520	826	0.479	-1.062	0.000575845	0.0114953	down	NW_018744460.1	1559523	1565323	-	LOC110697163	--	K23882 CDGSH iron-sulfur domain-containing protein 2 | (RefSeq) CDGSH iron-sulfur domain-containing protein NEET-like (A)	CDGSH iron-sulfur domain-containing protein NEET-like [Chenopodium quinoa]	RecName: Full=CDGSH iron-sulfur domain-containing protein NEET; Short=At-NEET;	SubName: Full=Uncharacterized protein {ECO:0000313|EMBL:KMS98949.1};	CDGSH-type Zn-finger containing protein	GO:0009507,chloroplast; GO:0009570,chloroplast stroma; GO:0005739,mitochondrion; GO:0051537,2 iron, 2 sulfur cluster binding; GO:0046872,metal ion binding; GO:0055072,iron ion homeostasis; GO:0010150,leaf senescence; GO:0072593,reactive oxygen species metabolic process	Iron-binding zinc finger CDGSH type
gene-LOC110697482	10.88	10.27	12.24	1.19	1.8	0.78	373	346	413	38	60	26	0.093	-3.422	5.24716e-29	4.16133e-26	down	NW_018744464.1	527688	547487	+	LOC110697482	--	K10743 ribonuclease H2 subunit A [EC:3.1.26.4] | (RefSeq) ribonuclease H2 subunit A-like (A)	ribonuclease H2 subunit A-like [Chenopodium quinoa]	RecName: Full=Ribonuclease H2 subunit A; Short=RNase H2 subunit A; EC=3.1.26.4; AltName: Full=Ribonuclease HI large subunit; Short=RNase HI large subunit; AltName: Full=Ribonuclease HI subunit A;	RecName: Full=Ribonuclease {ECO:0000256|RuleBase:RU003515}; EC=3.1.26.- {ECO:0000256|RuleBase:RU003515};	Ribonuclease HI	GO:0032299,ribonuclease H2 complex; GO:0046872,metal ion binding; GO:0003723,RNA binding; GO:0004523,RNA-DNA hybrid ribonuclease activity; GO:0043137,DNA replication, removal of RNA primer; GO:0006298,mismatch repair	Ribonuclease HII
gene-LOC110697499	22.4	17.9	29.79	4.71	8.4	4.63	833	654	1090	163	304	167	0.214	-2.227	6.28668e-19	1.82683e-16	down	NW_018744466.1	551104	557173	-	LOC110697499	--	K00134 glyceraldehyde 3-phosphate dehydrogenase [EC:1.2.1.12] | (RefSeq) glyceraldehyde-3-phosphate dehydrogenase GAPCP2, chloroplastic-like (A)	glyceraldehyde-3-phosphate dehydrogenase GAPCP2, chloroplastic-like [Chenopodium quinoa]	RecName: Full=Glyceraldehyde-3-phosphate dehydrogenase GAPCP2, chloroplastic; EC=1.2.1.12; AltName: Full=Glyceraldehyde-3-phosphate dehydrogenase of plastid 2; AltName: Full=NAD-dependent glyceraldehydephosphate dehydrogenase chloroplastic 2; Flags: Precursor;	RecName: Full=Glyceraldehyde-3-phosphate dehydrogenase {ECO:0000256|RuleBase:RU361160}; EC=1.2.1.- {ECO:0000256|RuleBase:RU361160};	Glyceraldehyde 3-phosphate dehydrogenase	GO:0009570,chloroplast stroma; GO:0009536,plastid; GO:0004365,glyceraldehyde-3-phosphate dehydrogenase (NAD+) (phosphorylating) activity; GO:0051287,NAD binding; GO:0050661,NADP binding; GO:0080144,amino acid homeostasis; GO:0005975,carbohydrate metabolic process; GO:0006006,glucose metabolic process; GO:0006096,glycolytic process; GO:0080022,primary root development	Glyceraldehyde 3-phosphate dehydrogenase, C-terminal domain
gene-LOC110697677	0.39	0.28	1.23	0.05	0	0	24	17	74	3	0	0	0.025	-5.313	2.32342e-06	9.11811e-05	down	NW_018744497.1	295418	298693	+	LOC110697677	--	--	--	--	--	--	--	--
gene-LOC110697744	22.6	21.37	22.08	1.33	1.17	1.41	676	628	650	37	34	41	0.049	-4.339	2.32364e-50	1.10568e-46	down	NW_018744498.1	919864	924138	-	LOC110697744	--	--	--	--	--	--	--	--
gene-LOC110697754	2.02	2.73	1.87	1.04	0.74	1.42	134	178	122	64	48	91	0.399	-1.327	0.003035	0.0432708	down	NW_018744498.1	2757099	2763164	+	LOC110697754	--	K19984 exocyst complex component 5 | (RefSeq) uncharacterized protein LOC112294431 (A)	formin-like protein 3 isoform X1 [Chenopodium quinoa]	RecName: Full=Formin-like protein 5; Short=AtFH5; Short=AtFORMIN-5; AltName: Full=Formin homology 2 domain-containing protein 5;	RecName: Full=Formin-like protein {ECO:0000256|RuleBase:RU361260};	Rho GTPase effector BNI1 and related formins	GO:0005618,cell wall; GO:0005737,cytoplasm; GO:0016021,integral component of membrane; GO:0009524,phragmoplast; GO:0003779,actin binding; GO:0030041,actin filament polymerization; GO:0045010,actin nucleation; GO:0009960,endosperm development; GO:0048317,seed morphogenesis	Formin Homology 2 Domain
gene-LOC110697787	0.17	0.03	0.33	0	0	0	13	2	25	0	0	0	0.013	-6.237	0.000186675	0.00436228	down	NW_018744501.1	229413	234294	-	LOC110697787	--	--	--	--	--	--	--	--
gene-LOC110697788	20.53	18.98	17.56	11.51	9.78	10.2	733	666	617	383	340	353	0.457	-1.128	4.73901e-05	0.00135232	down	NW_018744501.1	251588	255747	-	LOC110697788	--	K08145 MFS transporter, SP family, solute carrier family 2 (facilitated glucose transporter), member 8 | (RefSeq) sugar transporter ERD6-like 7 (A)	sugar transporter ERD6-like 7 [Chenopodium quinoa]	RecName: Full=Sugar transporter ERD6-like 7;	SubName: Full=Uncharacterized protein {ECO:0000313|EMBL:KNA16175.1};	Predicted transporter (major facilitator superfamily)	GO:0009507,chloroplast; GO:0016021,integral component of membrane; GO:0009705,plant-type vacuole membrane; GO:0005774,vacuolar membrane; GO:0005773,vacuole; GO:0005355,glucose transmembrane transporter activity; GO:0005351,carbohydrate:proton symporter activity; GO:0046323,glucose import; GO:0035428,NA; GO:0006829,zinc ion transport	Sugar (and other) transporter
gene-LOC110697793	12.7	8.38	7.63	0.26	0	0.03	421	273	249	8	0	1	0.008	-6.911	1.62281e-20	5.71995e-18	down	NW_018744501.1	401636	408473	+	LOC110697793	--	K15026 translation initiation factor 2A | (RefSeq) EIF2Aa; eukaryotic initiation factor (A)	uncharacterized protein LOC110697793 [Chenopodium quinoa]	RecName: Full=F-box protein SKIP8; AltName: Full=SKP1-interacting partner 8;	SubName: Full=Uncharacterized protein {ECO:0000313|EMBL:KNA08095.1};	--	GO:0016567,protein ubiquitination	SnoaL-like domain
gene-LOC110697931	0.19	0.28	1.03	0	0	0	5	7	26	0	0	0	0.014	-6.18	0.000101787	0.00260223	down	NW_018744501.1	1954713	1956982	-	LOC110697931	--	K14400 pre-mRNA cleavage complex 2 protein Pcf11 | (RefSeq) LOW QUALITY PROTEIN: uncharacterized protein LOC111982967 (A)	protein MAIN-LIKE 1-like [Chenopodium quinoa]	RecName: Full=Protein MAIN-LIKE 1 {ECO:0000303|PubMed:24635680};	SubName: Full=serine/threonine-protein phosphatase 7 long form homolog {ECO:0000313|RefSeq:XP_018818810.1, ECO:0000313|RefSeq:XP_018818811.1};	--	GO:0005634,nucleus; GO:0008483,transaminase activity; GO:0016458,gene silencing; GO:0010073,meristem maintenance; GO:0010082,regulation of root meristem growth	Plant mobile domain
gene-LOC110697940	9.33	12.64	10.51	3.94	4.29	4.79	386	514	428	152	173	192	0.331	-1.597	3.52303e-07	1.60288e-05	down	NW_018744502.1	29005	34843	+	LOC110697940	--	--	--	--	--	--	--	--
gene-LOC110697941	0.55	0.9	0.68	0.03	0.19	0	18	29	22	1	6	0	0.082	-3.614	0.000147087	0.00355729	down	NW_018744502.1	39121	72221	-	LOC110697941	--	K01757 strictosidine synthase [EC:4.3.3.2] | (RefSeq) protein STRICTOSIDINE SYNTHASE-LIKE 12-like (A)	protein STRICTOSIDINE SYNTHASE-LIKE 7-like [Chenopodium quinoa]	RecName: Full=Protein STRICTOSIDINE SYNTHASE-LIKE 7 {ECO:0000303|PubMed:10777701}; Short=AtSSL7 {ECO:0000303|PubMed:10777701}; Flags: Precursor;	SubName: Full=Uncharacterized protein {ECO:0000313|EMBL:KNA11958.1};	Predicted alkaloid synthase/Surface mucin Hemomucin	GO:0005783,endoplasmic reticulum; GO:0016020,membrane; GO:0005773,vacuole; GO:0016788,hydrolase activity, acting on ester bonds; GO:0009058,biosynthetic process; GO:0009723,response to ethylene; GO:0009620,response to fungus; GO:0009753,response to jasmonic acid; GO:0009751,response to salicylic acid; GO:0009615,response to virus; GO:0009611,response to wounding	Strictosidine synthase
gene-LOC110697959	39	33.78	30.26	13.24	8.02	10.97	664	565	507	210	133	181	0.261	-1.94	3.58703e-08	1.97323e-06	down	NW_018744502.1	1048936	1050201	+	LOC110697959	--	--	cold and drought-regulated protein CORA-like [Chenopodium quinoa]	--	--	--	--	Glycine rich protein family
gene-LOC110697983	2.37	2.22	3.25	1.69	0.89	1.16	63	58	85	42	23	30	0.411	-1.282	0.0010498	0.0187092	down	NW_018744502.1	2174176	2175909	+	LOC110697983	--	--	--	--	--	--	--	--
gene-LOC110698000	0.78	1.58	0.84	0.06	0.16	0	15	30	16	1	3	0	0.053	-4.246	5.47237e-05	0.00153739	down	NW_018744502.1	3207900	3210148	-	LOC110698000	--	--	uncharacterized protein LOC110698000 [Chenopodium quinoa]	--	SubName: Full=Uncharacterized protein {ECO:0000313|EMBL:KNA12514.1};	--	--	Plant transposase (Ptta/En/Spm family)
gene-LOC110698048	5.89	3.48	6.58	0	0	0	303	176	333	0	0	0	0.001	-10.693	1.6271e-18	4.4242e-16	down	NW_018744502.1	5736767	5739512	-	LOC110698048	--	--	uncharacterized protein LOC110698048 [Chenopodium quinoa]	--	--	--	--	--
gene-LOC110698085	7.58	9.14	10.75	3.49	3.17	4.73	238	282	332	102	97	144	0.353	-1.501	1.3896e-06	5.71251e-05	down	NW_018744502.1	6537456	6539026	+	LOC110698085	--	K17193 anthocyanidin 3-O-glucoside 2'''-O-xylosyltransferase [EC:2.4.2.51] | (RefSeq) anthocyanidin 3-O-glucoside 2'''-O-xylosyltransferase-like (A)	anthocyanidin 3-O-glucoside 2'''-O-xylosyltransferase-like [Chenopodium quinoa]	RecName: Full=Anthocyanidin 3-O-glucoside 2'''-O-xylosyltransferase; Short=A3G2''XylT; EC=2.4.2.51;	RecName: Full=Glycosyltransferase {ECO:0000256|RuleBase:RU362057}; EC=2.4.1.- {ECO:0000256|RuleBase:RU362057};	UDP-glucuronosyl and UDP-glucosyl transferase	GO:0043231,intracellular membrane-bounded organelle; GO:0102580,cyanidin 3-O-glucoside 2-O''-xylosyltransferase activity; GO:0080043,quercetin 3-O-glucosyltransferase activity; GO:0080044,quercetin 7-O-glucosyltransferase activity; GO:0035252,UDP-xylosyltransferase activity; GO:0009718,anthocyanin-containing compound biosynthetic process; GO:0071368,cellular response to cytokinin stimulus; GO:007…	UDP-glucoronosyl and UDP-glucosyl transferase
gene-LOC110698193	1.7	1.65	1.81	0	0	0	21	20	22	0	0	0	0.008	-7.046	1.39911e-07	6.92586e-06	down	NW_018744502.1	4373004	4374732	-	LOC110698193	--	--	--	--	--	--	--	--
gene-LOC110698240	171.22	211.47	124.06	0	0	0	5235	6352	3732	0	0	0	0	-15.034	3.79778e-33	4.38092e-30	down	NW_018742381.1	1316111	1320803	-	LOC110698240	--	--	calcium sensing receptor, chloroplastic-like [Chenopodium quinoa]	RecName: Full=Calcium sensing receptor, chloroplastic; AltName: Full=Sulfurtransferase 3; Short=AtStr3; Flags: Precursor;	SubName: Full=Uncharacterized protein {ECO:0000313|EMBL:KMS97432.1};	--	GO:0009507,chloroplast; GO:0009534,chloroplast thylakoid; GO:0009535,chloroplast thylakoid membrane; GO:0016021,integral component of membrane; GO:0005739,mitochondrion; GO:0009579,thylakoid; GO:0071277,cellular response to calcium ion; GO:0009704,de-etiolation; GO:0090333,regulation of stomatal closure	Rhodanese-like domain
gene-LOC110698247	0.22	0.21	0.78	0	0	0	12	11	42	0	0	0	0.008	-6.963	1.39963e-06	5.73517e-05	down	NW_018742381.1	1324246	1327091	+	LOC110698247	--	--	--	--	--	--	--	--
gene-LOC110698468	3.26	2.83	3.05	0.89	1.21	1.37	189	161	174	48	68	77	0.317	-1.657	1.11992e-07	5.63172e-06	down	NW_018742381.1	2217886	2227133	-	LOC110698468	--	--	uncharacterized protein LOC110698468 [Chenopodium quinoa]	--	SubName: Full=Uncharacterized protein {ECO:0000313|EMBL:KNA10551.1};	--	--	Shugoshin N-terminal coiled-coil region
gene-LOC110698477	1.23	0.81	2.57	0	0	0	17	11	35	0	0	0	0.008	-6.951	5.55347e-07	2.44964e-05	down	NW_018742204.1	22891595	22892882	-	LOC110698477	--	--	--	--	--	--	--	--
gene-LOC110698572	2.47	1.92	2.48	1.48	0.99	1.5	102	78	101	57	40	60	0.493	-1.02	0.00332537	0.0464199	down	NW_018744537.1	1588894	1593680	+	LOC110698572	--	K05864 peptidyl-prolyl isomerase D [EC:5.2.1.8] | (RefSeq) peptidyl-prolyl cis-trans isomerase CYP40-like (A)	peptidyl-prolyl cis-trans isomerase CYP40-like [Chenopodium quinoa]	RecName: Full=Peptidyl-prolyl cis-trans isomerase CYP40; Short=PPIase CYP40; EC=5.2.1.8; AltName: Full=Cyclophilin of 40 kDa; Short=Cyclophilin-40; AltName: Full=Protein SQUINT; AltName: Full=Rotamase CYP40;	SubName: Full=Uncharacterized protein {ECO:0000313|EMBL:KNA05029.1};	HSP90 co-chaperone CPR7/Cyclophilin	GO:0005737,cytoplasm; GO:0005829,cytosol; GO:0003755,peptidyl-prolyl cis-trans isomerase activity; GO:0010582,floral meristem determinacy; GO:0006457,protein folding; GO:0010050,vegetative phase change	Cyclophilin type peptidyl-prolyl cis-trans isomerase/CLD
gene-LOC110698601	2.32	4.46	1.21	0.54	0.92	0.18	78	147	40	17	30	6	0.154	-2.703	0.000211316	0.00486347	down	NW_018744537.1	1858126	1863056	-	LOC110698601	--	K20892 beta-arabinofuranosyltransferase [EC:2.4.2.-] | (RefSeq) glycosyl transferase family GT77, hemicellulose cell wall biosynthesis (A)	uncharacterized protein At4g15970-like [Chenopodium quinoa]	RecName: Full=Uncharacterized protein At4g15970;	SubName: Full=Uncharacterized protein {ECO:0000313|EMBL:KNA05902.1};	--	GO:0043231,intracellular membrane-bounded organelle; GO:0004519,endonuclease activity; GO:0003723,RNA binding; GO:0009451,RNA modification	Nucleotide-diphospho-sugar transferase
gene-LOC110698672	0.63	2.44	0.21	0	0.14	0.22	18	68	6	0	4	6	0.082	-3.609	0.00279715	0.0408436	down	NW_018744537.1	3058787	3061741	-	LOC110698672	--	--	--	--	--	--	--	--
gene-LOC110698686	0.63	0.35	0.53	0	0.01	0	62	34	51	0	1	0	0.006	-7.289	9.93883e-09	5.94877e-07	down	NW_018744537.1	3232235	3238615	+	LOC110698686	--	K05666 ATP-binding cassette, subfamily C (CFTR/MRP), member 2 | (RefSeq) ABC transporter C family member 3-like (A)	ABC transporter C family member 3-like [Chenopodium quinoa]	RecName: Full=ABC transporter C family member 3; Short=ABC transporter ABCC.3; Short=AtABCC3; EC=3.6.3.44; AltName: Full=ATP-energized glutathione S-conjugate pump 3; AltName: Full=Glutathione S-conjugate-transporting ATPase 3; AltName: Full=Multidrug resistance-associated protein 3;	SubName: Full=ABC transporter C family member 3 {ECO:0000313|RefSeq:XP_018812887.1};	Multidrug resistance-associated protein/mitoxantrone resistance protein, ABC superfamily	GO:0048046,apoplast; GO:0016021,integral component of membrane; GO:0000325,plant-type vacuole; GO:0009506,plasmodesma; GO:0005774,vacuolar membrane; GO:0005773,vacuole; GO:0005524,ATP binding; GO:0042626,ATPase activity, coupled to transmembrane movement of substances; GO:0010290,chlorophyll catabolite transmembrane transporter activity; GO:0015431,glutathione S-conjugate-exporting ATPase activit…	ABC transporter transmembrane region
gene-LOC110698811	3.54	4.36	9.51	0.61	1.17	0.54	81	98	214	13	26	12	0.116	-3.109	6.36337e-12	6.34121e-10	down	NW_018744537.1	5167907	5170830	-	LOC110698811	--	--	probable inactive nicotinamidase At3g16190 [Chenopodium quinoa]	RecName: Full=Probable inactive nicotinamidase At3g16190 {ECO:0000305};	SubName: Full=Uncharacterized protein {ECO:0000313|EMBL:KNA22449.1};	--	GO:0005737,cytoplasm; GO:0003824,catalytic activity; GO:0006212,uracil catabolic process	Isochorismatase family
gene-LOC110698883	0.22	0.24	0.24	0.02	0	0.02	12	13	13	1	0	1	0.046	-4.451	0.000346708	0.00745657	down	NW_018744537.1	2152901	2155644	-	LOC110698883	--	--	--	--	--	--	--	--
gene-LOC110698974	8.12	6.97	11.15	3.31	3.87	3.14	211	178	285	80	98	79	0.336	-1.575	3.99821e-14	5.30314e-12	down	NW_018742385.1	490559	493455	+	LOC110698974	--	--	--	--	--	--	--	--
gene-LOC110699015	29.77	46.73	38.73	15.44	24.32	22.14	1153	1778	1476	557	917	831	0.439	-1.187	0.000338475	0.00731505	down	NW_018744560.1	193618	197622	-	LOC110699015	--	K03781 catalase [EC:1.11.1.6] | (RefSeq) catalase-like (A)	catalase-like [Chenopodium quinoa]	RecName: Full=Catalase; EC=1.11.1.6;	SubName: Full=Uncharacterized protein {ECO:0000313|EMBL:KNA20548.1};	Catalase	GO:0005777,peroxisome; GO:0004096,catalase activity; GO:0020037,heme binding; GO:0046872,metal ion binding; GO:0042744,hydrogen peroxide catabolic process; GO:0006979,response to oxidative stress	Catalase
gene-LOC110699044	14.55	19.63	9.01	6.41	9.22	6.14	614	814	374	252	379	251	0.394	-1.343	0.00199266	0.0312803	down	NW_018744560.1	749135	756187	-	LOC110699044	--	K12890 splicing factor, arginine/serine-rich 1 | (RefSeq) uncharacterized protein LOC103422586 isoform X1 (A)	uncharacterized protein LOC110699044 [Chenopodium quinoa]	--	SubName: Full=Uncharacterized protein {ECO:0000313|EMBL:KNA19776.1};	--	--	--
gene-LOC110699168	5.15	3.6	7.93	2.22	3.4	2.75	302	207	457	121	194	156	0.436	-1.199	4.21209e-06	0.000156737	down	NW_018744582.1	442062	450852	-	LOC110699168	--	K13430 serine/threonine-protein kinase PBS1 [EC:2.7.11.1] | (RefSeq) serine/threonine-protein kinase PBS1-like (A)	receptor-like serine/threonine-protein kinase NCRK [Chenopodium quinoa]	RecName: Full=Receptor-like serine/threonine-protein kinase NCRK; EC=2.7.11.1; Flags: Precursor;	SubName: Full=Uncharacterized protein {ECO:0000313|EMBL:KNA08017.1};	Serine/threonine protein kinase	GO:0012505,endomembrane system; GO:0005768,endosome; GO:0010008,endosome membrane; GO:0016021,integral component of membrane; GO:0031902,late endosome membrane; GO:0005886,plasma membrane; GO:0005524,ATP binding; GO:0051020,GTPase binding; GO:0004675,transmembrane receptor protein serine/threonine kinase activity; GO:0007166,cell surface receptor signaling pathway; GO:0006468,protein phosphorylat…	Protein kinase domain
gene-LOC110699197	2.53	3.42	2.11	1.17	0.99	1.62	95	126	78	41	36	59	0.384	-1.382	0.00273777	0.0402078	down	NW_018744582.1	906219	908491	+	LOC110699197	--	K13493 cytokinin-N-glucosyltransferase [EC:2.4.1.-] | (RefSeq) UDP-glycosyltransferase 76C2 (A)	UDP-glycosyltransferase 76B1-like [Chenopodium quinoa]	RecName: Full=UDP-glycosyltransferase 76B1 {ECO:0000305}; EC=2.4.1.- {ECO:0000305};	SubName: Full=Uncharacterized protein {ECO:0000313|EMBL:KNA24610.1};	UDP-glucuronosyl and UDP-glucosyl transferase	GO:0043231,intracellular membrane-bounded organelle; GO:0046527,glucosyltransferase activity; GO:0080043,quercetin 3-O-glucosyltransferase activity; GO:0080044,quercetin 7-O-glucosyltransferase activity; GO:0052640,salicylic acid glucosyltransferase (glucoside-forming) activity; GO:0006952,defense response; GO:0010150,leaf senescence; GO:0008152,metabolic process; GO:0002239,response to oomycetes	UDP-glucoronosyl and UDP-glucosyl transferase
gene-LOC110699206	9.75	2.75	6.83	2.96	3.62	1.48	177	49	122	50	64	26	0.352	-1.508	0.00348934	0.0482312	down	NW_018744582.1	953119	954026	+	LOC110699206	--	--	--	--	--	--	--	--
gene-LOC110699308	0.55	0.37	0.83	0	0.08	0	21	14	31	0	3	0	0.04	-4.655	1.53312e-05	0.000501816	down	NW_018744582.1	2210060	2212057	+	LOC110699308	--	K15042 importin subunit alpha-6/7 | (RefSeq) importin subunit alpha-4-like (A)	uncharacterized protein LOC110694653 [Chenopodium quinoa]	RecName: Full=Protein FAR-RED IMPAIRED RESPONSE 1;	SubName: Full=Uncharacterized protein {ECO:0000313|EMBL:OMO51093.1};	--	GO:0005634,nucleus; GO:0003700,DNA-binding transcription factor activity; GO:0008270,zinc ion binding; GO:0010018,far-red light signaling pathway; GO:0042753,positive regulation of circadian rhythm; GO:0045893,positive regulation of transcription, DNA-templated; GO:0010017,red or far-red light signaling pathway; GO:0009585,red, far-red light phototransduction; GO:0010218,response to far red light…	MULE transposase domain
gene-LOC110699322	7.58	6.4	8.77	3.44	6.27	1.65	123	102	140	52	99	26	0.41	-1.286	0.00360379	0.0494719	down	NW_018744582.1	2362266	2363210	-	LOC110699322	--	--	--	--	--	--	--	--
gene-LOC110699593	0.22	0.17	0.6	0.02	0	0	15	11	40	1	0	0	0.015	-6.038	1.37554e-05	0.000458117	down	NW_018744593.1	1077118	1080492	-	LOC110699593	--	K14496 abscisic acid receptor PYR/PYL family | (RefSeq) abscisic acid receptor PYL2-like (A)	abscisic acid receptor PYL2-like [Chenopodium quinoa]	RecName: Full=Abscisic acid receptor PYL2; AltName: Full=PYR1-like protein 2; AltName: Full=Regulatory components of ABA receptor 14;	SubName: Full=Abscisic acid receptor PYL3 {ECO:0000313|EMBL:ARB50441.1};	--	GO:0005737,cytoplasm; GO:0005634,nucleus; GO:0005886,plasma membrane; GO:0010427,abscisic acid binding; GO:0042802,identical protein binding; GO:0042803,protein homodimerization activity; GO:0004864,protein phosphatase inhibitor activity; GO:0004872,NA; GO:0009738,abscisic acid-activated signaling pathway	Polyketide cyclase / dehydrase and lipid transport
gene-LOC110699600	15.75	23.41	12.04	7.91	7.82	7.29	658	961	495	308	318	295	0.358	-1.482	0.000247743	0.00556064	down	NW_018744593.1	1216446	1222663	+	LOC110699600	--	K22200 2-carboxy-D-arabinitol-1-phosphatase [EC:3.1.3.63] | (RefSeq) probable 2-carboxy-D-arabinitol-1-phosphatase (A)	probable 2-carboxy-D-arabinitol-1-phosphatase [Chenopodium quinoa]	RecName: Full=Probable 2-carboxy-D-arabinitol-1-phosphatase {ECO:0000305}; EC=3.1.3.63 {ECO:0000250|UniProtKB:W5EP13}; Flags: Precursor;	SubName: Full=Uncharacterized protein {ECO:0000313|EMBL:KNA05241.1};	Phosphoglycerate mutase	GO:0009507,chloroplast; GO:0009570,chloroplast stroma; GO:0047538,2-carboxy-D-arabinitol-1-phosphatase activity	Histidine phosphatase superfamily (branch 1)
gene-LOC110699601	0.54	0.12	0.67	0	0	0	38	8	46	0	0	0	0.006	-7.489	1.70539e-07	8.30168e-06	down	NW_018744593.1	1225579	1230635	+	LOC110699601	--	--	--	--	--	--	--	--
gene-LOC110699625	8.1	6.12	5.21	2.94	2	3.39	237	176	150	80	57	96	0.357	-1.487	0.000288225	0.00634946	down	NW_018744593.1	1996690	2002760	+	LOC110699625	--	K13946 auxin influx carrier (AUX1 LAX family) | (RefSeq) auxin transporter-like protein 4 (A)	GABA transporter 1-like [Chenopodium quinoa]	RecName: Full=GABA transporter 1; Short=AtGAT1; AltName: Full=Bidirectional amino acid transporter 1;	SubName: Full=Uncharacterized protein {ECO:0000313|EMBL:KNA04807.1}; Flags: Fragment;	Amino acid transporters	GO:0016021,integral component of membrane; GO:0005886,plasma membrane; GO:0015171,amino acid transmembrane transporter activity; GO:0015185,gamma-aminobutyric acid transmembrane transporter activity; GO:0003333,amino acid transmembrane transport; GO:0015812,gamma-aminobutyric acid transport	Transmembrane amino acid transporter protein
gene-LOC110699651	0.43	0.16	0.54	0.02	0.13	0.07	24	9	30	1	7	4	0.169	-2.562	0.00126632	0.0217794	down	NW_018744593.1	2614540	2617641	-	LOC110699651	--	--	--	--	--	--	--	--
gene-LOC110699712	11.34	8.23	0.28	0.72	0.28	1.74	289	206	7	17	7	43	0.11	-3.187	0.00296215	0.0425832	down	NW_018744593.1	5053214	5056007	-	LOC110699712	--	K00430 peroxidase [EC:1.11.1.7] | (RefSeq) peroxidase 4-like (A)	peroxidase 4-like [Chenopodium quinoa]	RecName: Full=Peroxidase 4 {ECO:0000250|UniProtKB:Q42578}; EC=1.11.1.7; Flags: Precursor;	RecName: Full=Peroxidase {ECO:0000256|RuleBase:RU362060, ECO:0000256|SAAS:SAAS00709852}; EC=1.11.1.7 {ECO:0000256|RuleBase:RU362060, ECO:0000256|SAAS:SAAS00709852};	--	GO:0005576,extracellular region; GO:0020037,heme binding; GO:0046872,metal ion binding; GO:0004601,peroxidase activity; GO:0042744,hydrogen peroxide catabolic process; GO:0006979,response to oxidative stress	Peroxidase
gene-LOC110699722	0.85	0.76	2.27	0	0	0	16	14	42	0	0	0	0.007	-7.139	2.32545e-07	1.1024e-05	down	NW_018744593.1	5328670	5332218	+	LOC110699722	--	--	uncharacterized protein LOC110699722 isoform X1 [Chenopodium quinoa]	--	SubName: Full=Uncharacterized protein {ECO:0000313|EMBL:KNA23168.1};	--	--	--
gene-LOC110699876	1.53	2.85	0.44	0.2	0.22	0.4	91	167	26	11	13	23	0.131	-2.936	0.000146707	0.00355261	down	NW_018744593.1	7832237	7837645	+	LOC110699876	--	--	--	--	--	--	--	--
gene-LOC110699937	118.3	190.93	56.65	53.21	40.2	60.06	1974	3130	930	827	653	971	0.329	-1.604	0.00320642	0.0451902	down	NW_018744603.1	1233505	1235373	-	LOC110699937	--	--	NAD(P)H-quinone oxidoreductase subunit L, chloroplastic-like [Chenopodium quinoa]	RecName: Full=NAD(P)H-quinone oxidoreductase subunit L, chloroplastic; EC=1.6.5.- {ECO:0000305}; AltName: Full=NAD(P)H dehydrogenase subunit L {ECO:0000303|PubMed:21785130}; Short=NDH subunit L {ECO:0000305}; Short=NDH-L {ECO:0000305}; AltName: Full=NADH-plastoquinone oxidoreductase subunit L {ECO:0000305}; AltName: Full=Protein CHLORORESPIRATORY REDUCTION 23 {ECO:0000303|PubMed:18388109}; Flags:…	SubName: Full=Uncharacterized protein {ECO:0000313|EMBL:KNA17248.1};	--	GO:0009535,chloroplast thylakoid membrane; GO:0016021,integral component of membrane; GO:0010598,NAD(P)H dehydrogenase complex (plastoquinone); GO:0042651,thylakoid membrane; GO:0016655,oxidoreductase activity, acting on NAD(P)H, quinone or similar compound as acceptor; GO:0048038,quinone binding; GO:0010258,NADH dehydrogenase complex (plastoquinone) assembly; GO:0009773,photosynthetic electron t…	NADH dehydrogenase transmembrane subunit
gene-LOC110700062	2.26	1.59	3.62	0	0	0	179	124	282	0	0	0	0.001	-10.195	8.22322e-17	1.62193e-14	down	NW_018744616.1	3828803	3842328	+	LOC110700062	--	--	--	--	--	--	--	--
gene-LOC110700102	0.56	1.35	0.72	0.25	0.27	0.21	19	45	24	8	9	7	0.224	-2.156	0.00104866	0.0187063	down	NW_018744616.1	631142	633973	+	LOC110700102	--	--	--	--	--	--	--	--
gene-LOC110700148	2.13	0.71	4.85	0.07	0.16	0	67	22	150	2	5	0	0.027	-5.202	6.47727e-09	4.00927e-07	down	NW_018744620.1	1027183	1046108	+	LOC110700148	--	K00815 tyrosine aminotransferase [EC:2.6.1.5] | (RefSeq) tyrosine aminotransferase-like (A)	tyrosine aminotransferase-like [Chenopodium quinoa]	RecName: Full=Tyrosine aminotransferase; Short=TAT; EC=2.6.1.5; AltName: Full=L-tyrosine:2-oxoglutarate aminotransferase;	SubName: Full=Uncharacterized protein {ECO:0000313|EMBL:KNA13249.1};	Tyrosine aminotransferase	GO:0005829,cytosol; GO:0080130,L-phenylalanine:2-oxoglutarate aminotransferase activity; GO:0004838,L-tyrosine:2-oxoglutarate aminotransferase activity; GO:0030170,pyridoxal phosphate binding; GO:0009058,biosynthetic process; GO:0006520,cellular amino acid metabolic process; GO:0006559,L-phenylalanine catabolic process; GO:0006572,tyrosine catabolic process	Aminotransferase class I and II
gene-LOC110700156	0.35	0.23	0.6	0.03	0.05	0.02	36	23	61	3	5	2	0.075	-3.738	1.41911e-08	8.3366e-07	down	NW_018744620.1	1240632	1245953	+	LOC110700156	--	--	--	--	--	--	--	--
gene-LOC110700174	9.68	18.83	10.72	5.58	6.48	5.96	201	384	219	108	131	120	0.368	-1.444	0.000621292	0.0122289	down	NW_018744620.1	1971264	1972302	-	LOC110700174	--	--	fasciclin-like arabinogalactan protein 9 [Chenopodium quinoa]	RecName: Full=Fasciclin-like arabinogalactan protein 9; Flags: Precursor;	SubName: Full=Uncharacterized protein {ECO:0000313|EMBL:KNA15304.1};	--	GO:0031225,anchored component of membrane; GO:0046658,anchored component of plasma membrane; GO:0005886,plasma membrane	Fasciclin domain
gene-LOC110700235	1.87	1.49	2.61	0	0	0	51	40	70	0	0	0	0.003	-8.359	2.30899e-11	2.1129e-09	down	NW_018744625.1	121034	126603	-	LOC110700235	--	--	uncharacterized protein LOC110700235 [Chenopodium quinoa]	--	--	--	--	--
gene-LOC110700331	3.61	2.02	4.35	0	0	0	91	50	108	0	0	0	0.002	-8.977	6.15876e-13	7.16958e-11	down	NW_018742390.1	5892722	5894081	+	LOC110700331	--	--	--	--	--	--	--	--
gene-LOC110700412	5.27	6.02	2.8	0.7	2.03	0.38	283	318	148	35	106	20	0.167	-2.583	3.3964e-05	0.00100537	down	NW_018744626.1	1949883	1952571	-	LOC110700412	--	K10260 F-box and WD-40 domain protein 7 | (RefSeq) WD40 repeat protein (A)	U-box domain-containing protein 19-like [Chenopodium quinoa]	RecName: Full=U-box domain-containing protein 19; EC=2.3.2.27; AltName: Full=Plant U-box protein 19; AltName: Full=RING-type E3 ubiquitin transferase PUB19 {ECO:0000305};	RecName: Full=RING-type E3 ubiquitin transferase {ECO:0000256|SAAS:SAAS00702733}; EC=2.3.2.27 {ECO:0000256|SAAS:SAAS00702733};	FOG: Armadillo/beta-catenin-like repeats	GO:0005737,cytoplasm; GO:0005634,nucleus; GO:0004842,ubiquitin-protein transferase activity; GO:0010029,regulation of seed germination	U-box domain
gene-LOC110700427	1.5	4.28	0.51	0.09	0.06	0.4	54	151	18	3	2	14	0.068	-3.884	0.00011713	0.00292955	down	NW_018744626.1	2165633	2168531	+	LOC110700427	--	--	--	--	--	--	--	--
gene-LOC110700437	2.39	1.69	3.53	1.19	1.45	0.44	78	54	113	36	46	14	0.345	-1.534	0.000637961	0.0124732	down	NW_018744626.1	2247849	2252238	-	LOC110700437	--	K15030 translation initiation factor 3 subunit M | (RefSeq) uncharacterized protein LOC106431989 (A)	F-box protein CPR30-like [Chenopodium quinoa]	RecName: Full=F-box protein CPR1; AltName: Full=Protein CONSTITUTIVE EXPRESSER OF PR GENES 1; AltName: Full=Protein CONSTITUTIVE EXPRESSER OF PR GENES 30 {ECO:0000303|PubMed:19682297};	SubName: Full=Uncharacterized protein {ECO:0000313|EMBL:KNA25181.1};	--	GO:0005737,cytoplasm; GO:0005634,nucleus; GO:0004842,ubiquitin-protein transferase activity; GO:0031348,negative regulation of defense response; GO:0042177,negative regulation of protein catabolic process; GO:0009626,plant-type hypersensitive response; GO:0031146,SCF-dependent proteasomal ubiquitin-dependent protein catabolic process	F-box domain
gene-LOC110700453	11.38	10.52	8.41	1.46	3.91	1.49	260	236	189	31	87	33	0.18	-2.477	3.88727e-08	2.1261e-06	down	NW_018744626.1	2461897	2464049	+	LOC110700453	--	--	uncharacterized protein At5g50100, mitochondrial-like [Chenopodium quinoa]	RecName: Full=Uncharacterized protein At5g50100, chloroplastic; Flags: Precursor;	SubName: Full=Uncharacterized protein {ECO:0000313|EMBL:KNA08466.1};	--	GO:0009507,chloroplast; GO:0005739,mitochondrion; GO:0015035,protein disulfide oxidoreductase activity; GO:0042246,tissue regeneration	Protein of unknown function, DUF393
gene-LOC110700625	3.34	2.35	5.18	1.88	2.58	1.31	84	58	128	44	63	32	0.457	-1.131	0.00101916	0.0183324	down	NW_018744626.1	4769557	4772600	-	LOC110700625	--	K19041 E3 ubiquitin-protein ligase RNF38/44 [EC:2.3.2.27] | (RefSeq) anaphase-promoting complex subunit 11 RING-H2 finger protein (A)	NEP1-interacting protein-like 2 [Chenopodium quinoa]	RecName: Full=NEP1-interacting protein-like 2; AltName: Full=RING-H2 finger protein ATL24;	SubName: Full=Uncharacterized protein {ECO:0000313|EMBL:KNA03626.1};	FOG: Predicted E3 ubiquitin ligase	GO:0016021,integral component of membrane; GO:0046872,metal ion binding; GO:0061630,ubiquitin protein ligase activity; GO:0006952,defense response; GO:0043161,proteasome-mediated ubiquitin-dependent protein catabolic process; GO:0010200,response to chitin	Ring finger domain
gene-LOC110700628	13.04	10.87	7.24	5.87	4.94	5.54	260	213	142	109	96	107	0.427	-1.226	0.00211738	0.0327918	down	NW_018744626.1	4813606	4814834	+	LOC110700628	--	K01183 chitinase [EC:3.2.1.14] | (RefSeq) basic endochitinase-like (A)	basic endochitinase-like [Chenopodium quinoa]	RecName: Full=Basic endochitinase; EC=3.2.1.14; Flags: Precursor;	SubName: Full=Chitinase {ECO:0000313|EMBL:BAB92957.1};	Chitinase	GO:0004568,chitinase activity; GO:0006032,chitin catabolic process; GO:0000272,polysaccharide catabolic process	Glycosyl hydrolases family 18
gene-LOC110700687	26.13	4.95	42.94	1.03	0.57	0.13	1036	193	1675	38	22	5	0.021	-5.549	9.38882e-14	1.18739e-11	down	NW_018744626.1	5788513	5793127	+	LOC110700687	--	K05280 flavonoid 3'-monooxygenase [EC:1.14.14.82] | (RefSeq) flavonoid 3'-monooxygenase-like (A)	flavonoid 3'-monooxygenase-like [Chenopodium quinoa]	RecName: Full=Flavonoid 3'-monooxygenase; EC=1.14.13.21; AltName: Full=Cytochrome P450 75B2; AltName: Full=Flavonoid 3'-hydroxylase;	SubName: Full=Flavonoid 3'hydroxylase {ECO:0000313|EMBL:AMQ23620.1};	Cytochrome P450 CYP2 subfamily	GO:0005789,endoplasmic reticulum membrane; GO:0016021,integral component of membrane; GO:0016711,flavonoid 3'-monooxygenase activity; GO:0020037,heme binding; GO:0005506,iron ion binding; GO:0009813,flavonoid biosynthetic process	Cytochrome P450
gene-LOC110700712	0.44	0.42	0.36	0.03	0.08	0.11	16	15	13	1	3	4	0.155	-2.693	0.00113594	0.0199362	down	NW_018744626.1	6077189	6080001	+	LOC110700712	--	--	B3 domain-containing protein Os12g0592300-like [Chenopodium quinoa]	RecName: Full=B3 domain-containing protein Os03g0622200;	SubName: Full=DSBA oxidoreductase family protein isoform 1 {ECO:0000313|EMBL:EOX91266.1};	--	GO:0005634,nucleus; GO:0003677,DNA binding; GO:0006355,regulation of transcription, DNA-templated; GO:0006351,transcription, DNA-templated	B3 DNA binding domain
gene-LOC110700729	1.41	0.13	1.89	0.05	0.32	0.05	32	3	42	1	7	1	0.105	-3.252	0.00293111	0.0422647	down	NW_018744626.1	6217307	6218603	+	LOC110700729	--	--	--	--	--	--	--	--
gene-LOC110700731	0.2	0.46	1.14	0.14	0.23	0.17	20	44	110	13	22	16	0.269	-1.895	0.00182591	0.0294045	down	NW_018744626.1	6250959	6257687	-	LOC110700731	--	--	protein LONGIFOLIA 1-like isoform X1 [Chenopodium quinoa]	RecName: Full=Protein LONGIFOLIA 1; AltName: Full=Protein TON1 RECRUITING MOTIF 2;	SubName: Full=Uncharacterized protein {ECO:0000313|EMBL:KNA03688.1};	--	GO:0005829,cytosol; GO:0005634,nucleus; GO:0051513,regulation of monopolar cell growth	Domain of unknown function (DUF4378)
gene-LOC110700743	0.67	0.68	0.98	0	0	0	30	30	43	0	0	0	0.005	-7.729	1.5924e-09	1.08646e-07	down	NW_018742390.1	8198285	8201542	+	LOC110700743	--	--	--	--	--	--	--	--
gene-LOC110700757	0.25	0.25	0.17	0	0	0	9	9	6	0	0	0	0.019	-5.694	0.000315568	0.0068999	down	NW_018742390.1	8231634	8235240	+	LOC110700757	--	--	--	--	--	--	--	--
gene-LOC110700776	0.14	0.14	0.09	0	0	0	6	6	4	0	0	0	0.029	-5.109	0.00308501	0.0438525	down	NW_018744626.1	1081449	1083849	+	LOC110700776	--	--	--	--	--	--	--	--
gene-LOC110700813	0.93	0.94	1.54	0	0	0	11	11	18	0	0	0	0.012	-6.352	7.45829e-06	0.000262156	down	NW_018744626.1	5096060	5097662	-	LOC110700813	--	--	--	--	--	--	--	--
gene-LOC110700829	0.9	4.16	0.08	0.18	0	0.08	11	50	1	2	0	1	0.037	-4.747	0.00222429	0.0339975	down	NW_018744626.1	176293	176904	-	LOC110700829	--	K13418 somatic embryogenesis receptor kinase 1 [EC:2.7.10.1 2.7.11.1] | (RefSeq) somatic embryogenesis receptor kinase 2 (A)	inactive LRR receptor-like serine/threonine-protein kinase BIR2 [Chenopodium quinoa]	RecName: Full=Probably inactive leucine-rich repeat receptor-like protein kinase At5g48380; Flags: Precursor;	SubName: Full=probably inactive leucine-rich repeat receptor-like protein kinase At5g48380 {ECO:0000313|RefSeq:XP_018817938.1, ECO:0000313|RefSeq:XP_018817939.1, ECO:0000313|RefSeq:XP_018817940.1};	--	GO:0016021,integral component of membrane; GO:0005886,plasma membrane; GO:0009506,plasmodesma; GO:0005524,ATP binding; GO:0016301,kinase activity; GO:0004672,protein kinase activity; GO:0033612,receptor serine/threonine kinase binding; GO:0042742,defense response to bacterium; GO:0060548,negative regulation of cell death; GO:0031348,negative regulation of defense response	Leucine rich repeat
gene-LOC110700846	282.73	408.67	184.97	84.04	130.11	117.44	1712	2431	1102	474	767	689	0.297	-1.749	7.07325e-05	0.00190827	down	NW_018744626.1	771620	771922	+	LOC110700846	--	--	putative lipid-transfer protein DIR1 [Chenopodium quinoa]	RecName: Full=Putative lipid-transfer protein DIR1; AltName: Full=Protein DEFECTIVE IN INDUCED RESISTANCE 1; Flags: Precursor;	SubName: Full=Uncharacterized protein {ECO:0000313|EMBL:KNA05451.1};	--	GO:0048046,apoplast; GO:0005783,endoplasmic reticulum; GO:0009506,plasmodesma; GO:0005504,fatty acid binding; GO:0043621,protein self-association; GO:0008270,zinc ion binding; GO:0006869,lipid transport; GO:0009627,systemic acquired resistance; GO:0009862,systemic acquired resistance, salicylic acid mediated signaling pathway	Probable lipid transfer
gene-LOC110700848	32.8	47.88	27.35	21.13	20.1	18.48	295	423	242	177	176	161	0.443	-1.174	0.00267569	0.0395095	down	NW_018744626.1	901817	902266	+	LOC110700848	--	--	uncharacterized protein LOC110700848 [Chenopodium quinoa]	--	SubName: Full=Uncharacterized protein {ECO:0000313|EMBL:PHT53944.1};	--	--	--
gene-LOC110700897	12.05	12.07	6.4	3.08	0.67	2.1	130	128	68	31	7	22	0.157	-2.668	3.53277e-05	0.00104088	down	NW_018744626.1	3747326	3747865	-	LOC110700897	--	--	nucleolar protein 58-like [Chenopodium quinoa]	--	SubName: Full=Uncharacterized protein {ECO:0000313|EMBL:KNA14496.1};	--	--	--
gene-LOC110700938	14.9	15.81	10.37	8.24	8.26	6.34	165	172	113	85	89	68	0.448	-1.157	0.00234683	0.0355781	down	NW_018744633.1	1917101	1920771	+	LOC110700938	--	--	--	--	--	--	--	--
gene-LOC110700975	0.27	0.19	0.27	0	0	0	16	11	16	0	0	0	0.011	-6.475	3.81354e-06	0.000143307	down	NW_018744633.1	2746086	2751532	-	LOC110700975	--	--	--	--	--	--	--	--
gene-LOC110701066	2.37	3.2	5.18	1.24	1.58	1.56	226	300	487	110	147	144	0.352	-1.507	3.09679e-07	1.42892e-05	down	NW_018744633.1	3588538	3598587	+	LOC110701066	--	K11592 endoribonuclease Dicer [EC:3.1.26.-] | (RefSeq) endoribonuclease Dicer homolog 2-like (A)	endoribonuclease Dicer homolog 2-like [Chenopodium quinoa]	RecName: Full=Endoribonuclease Dicer homolog 2; EC=3.1.26.-; AltName: Full=Dicer-like protein 2; Short=AtDCL2;	SubName: Full=Uncharacterized protein {ECO:0000313|EMBL:KNA10399.1};	dsRNA-specific nuclease Dicer and related ribonucleases	GO:0005737,cytoplasm; GO:0005634,nucleus; GO:0016442,RISC complex; GO:0005524,ATP binding; GO:0004386,helicase activity; GO:0046872,metal ion binding; GO:0004525,ribonuclease III activity; GO:0003723,RNA binding; GO:0010216,maintenance of DNA methylation; GO:0010267,production of ta-siRNAs involved in RNA interference; GO:0051214,RNA virus induced gene silencing	Ribonuclease III domain
gene-LOC110701311	6.66	9.5	4.62	0.73	1	1.47	341	478	233	35	50	73	0.124	-3.015	9.83038e-10	6.96858e-08	down	NW_018744633.1	6106390	6110709	-	LOC110701311	--	K00128 aldehyde dehydrogenase (NAD+) [EC:1.2.1.3] | (RefSeq) aldehyde dehydrogenase family 3 member H1-like isoform X1 (A)	aldehyde dehydrogenase family 3 member H1-like isoform X1 [Chenopodium quinoa]	RecName: Full=Aldehyde dehydrogenase family 3 member I1, chloroplastic; Short=AtALDH3; Short=Ath-ALDH3; EC=1.2.1.3; Flags: Precursor;	RecName: Full=Aldehyde dehydrogenase {ECO:0000256|PIRNR:PIRNR036492};	Aldehyde dehydrogenase	GO:0009507,chloroplast; GO:0009941,chloroplast envelope; GO:0009536,plastid; GO:0004028,3-chloroallyl aldehyde dehydrogenase activity; GO:0004029,aldehyde dehydrogenase (NAD) activity; GO:0033721,aldehyde dehydrogenase (NADP+) activity; GO:0004030,aldehyde dehydrogenase [NAD(P)+] activity; GO:0006081,cellular aldehyde metabolic process; GO:0009737,response to abscisic acid; GO:0009414,response to…	Aldehyde dehydrogenase family
gene-LOC110701403	2.95	6.41	1.24	0.64	0.39	0.61	109	233	45	22	14	22	0.119	-3.068	1.63894e-05	0.000532335	down	NW_018744633.1	7180249	7182100	-	LOC110701403	--	K03320 ammonium transporter, Amt family | (RefSeq) ammonium transporter 1 member 2-like (A)	ammonium transporter 1 member 2-like [Chenopodium quinoa]	RecName: Full=Ammonium transporter 1 member 2; AltName: Full=LeAMT1;2;	RecName: Full=Ammonium transporter {ECO:0000256|RuleBase:RU362002};	Ammonia permease	GO:0005887,integral component of plasma membrane; GO:0008519,ammonium transmembrane transporter activity; GO:0072488,ammonium transmembrane transport; GO:0015696,ammonium transport; GO:0015843,methylammonium transport; GO:0015695,organic cation transport; GO:0009624,response to nematode	Ammonium Transporter Family
gene-LOC110701422	8.84	8.3	11.61	4.19	4.36	3.74	437	403	565	193	210	179	0.363	-1.463	5.07997e-17	1.03411e-14	down	NW_018742204.1	2864167	2887553	+	LOC110701422	--	--	--	--	--	--	--	--
gene-LOC110701499	9.76	13.15	13.67	0.21	0.47	0.07	148	196	204	3	7	1	0.017	-5.878	4.19802e-25	2.57752e-22	down	NW_018744633.1	931862	932720	-	LOC110701499	--	--	--	--	--	--	--	--
gene-LOC110701564	0.29	0.52	0.45	0	0	0	4	7	6	0	0	0	0.028	-5.175	0.0023656	0.0357488	down	NW_018744633.1	1987111	1987794	+	LOC110701564	--	K02111 F-type H+/Na+-transporting ATPase subunit alpha [EC:7.1.2.2 7.2.2.1] | (RefSeq) LOW QUALITY PROTEIN: uncharacterized protein LOC114822316 (A)	uncharacterized protein LOC110701564 [Chenopodium quinoa]	--	SubName: Full=uncharacterized protein LOC107895497 {ECO:0000313|RefSeq:XP_016676253.1};	--	--	gag-polypeptide of LTR copia-type
gene-LOC110701617	2.54	2.17	1.66	0.68	0.7	0.33	56	47	36	14	15	7	0.217	-2.204	2.74845e-05	0.000838344	down	NW_018742393.1	2035601	2037141	-	LOC110701617	--	--	COBRA-like protein 2 [Chenopodium quinoa]	RecName: Full=COBRA-like protein 2; Flags: Precursor;	SubName: Full=Uncharacterized protein {ECO:0000313|EMBL:PKI70042.1};	--	GO:0031225,anchored component of membrane; GO:0046658,anchored component of plasma membrane; GO:0005794,Golgi apparatus; GO:0016049,cell growth; GO:0010215,cellulose microfibril organization; GO:0048354,mucilage biosynthetic process involved in seed coat development; GO:0009832,plant-type cell wall biogenesis; GO:0052324,plant-type cell wall cellulose biosynthetic process; GO:0009664,plant-type c…	COBRA-like protein
gene-LOC110701727	1.95	1.91	2.51	0.98	0.96	0.92	79	76	100	37	38	36	0.381	-1.393	2.12948e-06	8.43029e-05	down	NW_018742204.1	3362335	3366884	+	LOC110701727	--	--	--	--	--	--	--	--
gene-LOC110701741	22.5	13.66	34.78	10.62	19.61	10.08	357	213	543	157	303	155	0.491	-1.027	0.0018984	0.030133	down	NW_018744656.1	448523	451484	+	LOC110701741	--	--	uncharacterized protein LOC110701741 isoform X1 [Chenopodium quinoa]	--	SubName: Full=Uncharacterized protein {ECO:0000313|EMBL:KNA06093.1};	--	--	--
gene-LOC110701747	2.24	2.14	2.24	1.29	1.17	1.26	114	107	112	61	58	62	0.47	-1.089	0.000254107	0.00568336	down	NW_018744656.1	507010	522960	+	LOC110701747	--	--	--	--	--	--	--	--
gene-LOC110701770	0.87	0.62	1.5	0.45	0.43	0.27	23	16	39	11	11	7	0.335	-1.579	0.00318804	0.0450145	down	NW_018744659.1	138997	141437	-	LOC110701770	--	K13065 shikimate O-hydroxycinnamoyltransferase [EC:2.3.1.133] | (RefSeq) anthranilate N-benzoyltransferase protein 3-like (A)	anthranilate N-benzoyltransferase protein 3-like [Chenopodium quinoa]	RecName: Full=Anthranilate N-benzoyltransferase protein 1; EC=2.3.1.144; AltName: Full=Anthranilate N-hydroxycinnamoyl/benzoyltransferase 1;	SubName: Full=Uncharacterized protein {ECO:0000313|EMBL:KNA19134.1};	--	GO:0047672,anthranilate N-benzoyltransferase activity; GO:0009813,flavonoid biosynthetic process	Transferase family
gene-LOC110701891	36.07	40.29	21.55	3.03	1.51	2.45	883	969	519	69	36	58	0.058	-4.112	3.93728e-18	9.79611e-16	down	NW_018744662.1	521727	526372	+	LOC110701891	--	--	probable plastid-lipid-associated protein 4, chloroplastic [Chenopodium quinoa]	RecName: Full=Probable plastid-lipid-associated protein 4, chloroplastic; AltName: Full=Fibrillin-3a; AltName: Full=Plastoglobulin 25; Short=AtPGL25; Flags: Precursor;	SubName: Full=Uncharacterized protein {ECO:0000313|EMBL:KNA16791.1};	--	GO:0009507,chloroplast; GO:0009534,chloroplast thylakoid; GO:0009535,chloroplast thylakoid membrane; GO:0010287,plastoglobule	PAP_fibrillin
gene-LOC110702015	105.16	156.73	59.44	50.8	30.01	53.24	2318	3394	1289	1043	644	1137	0.333	-1.587	0.00211459	0.032762	down	NW_018744662.1	2401614	2405339	-	LOC110702015	--	K20471 coatomer subunit delta | (RefSeq) coatomer subunit delta-3-like (A)	ATP-dependent Clp protease adapter protein CLPS1, chloroplastic-like [Chenopodium quinoa]	RecName: Full=ATP-dependent Clp protease adapter protein CLPS1, chloroplastic {ECO:0000303|Ref.6}; Flags: Precursor;	SubName: Full=Uncharacterized protein {ECO:0000313|EMBL:KNA06547.1};	--	GO:0009570,chloroplast stroma; GO:0005840,ribosome; GO:0008233,peptidase activity; GO:0030163,protein catabolic process	ATP-dependent Clp protease adaptor protein ClpS
gene-LOC110702215	1.23	1.52	1.63	0.05	0.22	0.76	75	91	98	3	13	45	0.204	-2.295	0.00355232	0.0489187	down	NW_018744676.1	448708	455412	+	LOC110702215	--	K10572 inositol-pentakisphosphate 2-kinase [EC:2.7.1.158] | (RefSeq) inositol-pentakisphosphate 2-kinase-like isoform X1 (A)	inositol-pentakisphosphate 2-kinase-like isoform X1 [Chenopodium quinoa]	RecName: Full=Inositol-pentakisphosphate 2-kinase; EC=2.7.1.158; AltName: Full=Inositol-1,3,4,5,6-pentakisphosphate 2-kinase; AltName: Full=Ins(1,3,4,5,6)P5 2-kinase; Short=AtIPK1; Short=InsP5 2-kinase;	RecName: Full=Inositol-pentakisphosphate 2-kinase {ECO:0000256|RuleBase:RU364126}; EC=2.7.1.158 {ECO:0000256|RuleBase:RU364126};	Inositol polyphosphate kinase	GO:0005737,cytoplasm; GO:0005634,nucleus; GO:0005524,ATP binding; GO:0035299,inositol pentakisphosphate 2-kinase activity; GO:0032942,inositol tetrakisphosphate 2-kinase activity; GO:0046872,metal ion binding; GO:0030643,cellular phosphate ion homeostasis; GO:0042742,defense response to bacterium; GO:0050832,defense response to fungus; GO:0051607,defense response to virus; GO:0040007,growth; GO:0…	Inositol-pentakisphosphate 2-kinase
gene-LOC110702238	0.21	2.61	3.44	0.25	0.33	0.18	7	87	115	8	11	6	0.105	-3.257	0.000182339	0.00426881	down	NW_018742393.1	310401	314273	+	LOC110702238	--	K03978 GTP-binding protein | (RefSeq) GTP-binding protein At2g22870-like (A)	GTP-binding protein At2g22870-like [Chenopodium quinoa]	RecName: Full=GTP-binding protein At2g22870; AltName: Full=Protein EMBRYO DEFECTIVE 2001;	SubName: Full=Uncharacterized protein {ECO:0000313|EMBL:KNA21746.1};	Predicted GTPase	GO:0005737,cytoplasm; GO:0005525,GTP binding; GO:0046872,metal ion binding	50S ribosome-binding GTPase
gene-LOC110702257	2.97	2.45	4.44	1.15	2.74	1.45	89	72	131	32	80	42	0.459	-1.125	0.0023134	0.0351553	down	NW_018744689.1	221466	228374	+	LOC110702257	--	K09571 FK506-binding protein 4/5 [EC:5.2.1.8] | (RefSeq) peptidyl-prolyl cis-trans isomerase FKBP62-like protein (A)	sperm-associated antigen 1-like [Chenopodium quinoa]	RecName: Full=Peptidyl-prolyl cis-trans isomerase FKBP62; Short=PPIase FKBP62; EC=5.2.1.8; AltName: Full=70 kDa peptidyl-prolyl isomerase; AltName: Full=FK506-binding protein 62; Short=AtFKBP62; AltName: Full=Immunophilin FKBP62; AltName: Full=Peptidylprolyl isomerase ROF1; AltName: Full=Protein ROTAMASE FKBP 1; AltName: Full=Rotamase;	SubName: Full=Uncharacterized protein {ECO:0000313|EMBL:KMS95620.1};	--	GO:0005737,cytoplasm; GO:0005634,nucleus; GO:0005516,calmodulin binding; GO:0005528,FK506 binding; GO:0003755,peptidyl-prolyl cis-trans isomerase activity; GO:0070370,cellular heat acclimation; GO:0061077,chaperone-mediated protein folding	Tetratricopeptide repeat
gene-LOC110702310	0.37	0.22	1.85	0	0	0	7	4	34	0	0	0	0.012	-6.372	0.000102739	0.00262482	down	NW_018744693.1	2606622	2607644	-	LOC110702310	--	K00384 thioredoxin reductase (NADPH) [EC:1.8.1.9] | (RefSeq) thioredoxin reductase 2 (A)	glutathione S-transferase T3-like [Chenopodium quinoa]	RecName: Full=Glutathione S-transferase T3; Short=AtGSTT3; EC=2.5.1.18; AltName: Full=GST class-theta member 3; AltName: Full=Glutathione S-transferase 10C;	SubName: Full=Uncharacterized protein {ECO:0000313|EnsemblPlants:Bo6g029440.1};	--	GO:0005737,cytoplasm; GO:0005634,nucleus; GO:0004364,glutathione transferase activity; GO:0006749,glutathione metabolic process; GO:0009407,toxin catabolic process	No apical meristem-associated C-terminal domain
gene-LOC110702399	0.58	0.15	0.24	0	0	0	12	3	5	0	0	0	0.024	-5.383	0.00202597	0.0316884	down	NW_018744693.1	7208813	7212455	+	LOC110702399	--	K10569 endonuclease VIII-like 3 | (RefSeq) hypothetical protein (A)	uncharacterized protein LOC110702399 [Chenopodium quinoa]	--	RecName: Full=DNA topoisomerase {ECO:0000256|RuleBase:RU362092}; EC=5.99.1.2 {ECO:0000256|RuleBase:RU362092};	E3 ubiquitin ligase interacting with arginine methyltransferase	GO:0003677,DNA binding; GO:0003917,DNA topoisomerase type I activity; GO:0008270,zinc ion binding; GO:0006265,DNA topological change	GRF zinc finger
gene-LOC110702471	4.6	10.53	3.24	2.25	1.87	1.51	101	227	70	46	40	32	0.237	-2.08	0.000477079	0.00975347	down	NW_018744693.1	993799	995010	-	LOC110702471	--	K03239 translation initiation factor eIF-2B subunit alpha | (RefSeq) methylthioribose-1-phosphate isomerase (A)	protein LURP-one-related 11-like [Chenopodium quinoa]	RecName: Full=Protein LURP-one-related 11;	SubName: Full=Uncharacterized protein {ECO:0000313|EMBL:KNA19881.1};	--	--	LURP-one-related
gene-LOC110702715	4.56	5.59	7.26	2.88	3.53	3.14	138	166	216	81	104	92	0.465	-1.106	1.35341e-05	0.000452327	down	NW_018742393.1	911225	914076	+	LOC110702715	--	--	protein TAB2 homolog, chloroplastic-like [Chenopodium quinoa]	RecName: Full=Protein TAB2 homolog, chloroplastic {ECO:0000305}; AltName: Full=Protein ATAB2 {ECO:0000303|PubMed:17139246}; Flags: Precursor;	SubName: Full=Uncharacterized protein {ECO:0000313|EMBL:KNA16197.1};	--	GO:0009507,chloroplast; GO:0003723,RNA binding; GO:0009658,chloroplast organization; GO:0009704,de-etiolation; GO:0048564,photosystem I assembly; GO:0006412,translation	RNA-binding protein Tab2/Atab2
gene-LOC110702743	8.86	7.42	9.51	2.55	3.5	3.21	411	338	434	110	158	144	0.302	-1.729	6.03205e-15	8.83161e-13	down	NW_018742204.1	3879173	3896677	+	LOC110702743	--	--	--	--	--	--	--	--
gene-LOC110702789	2.85	4.78	2.71	1.24	1.16	2.12	217	357	203	88	86	156	0.356	-1.49	0.00177856	0.0287737	down	NW_018744702.1	1970646	1981463	+	LOC110702789	--	--	--	--	--	--	--	--
gene-LOC110702821	2.09	1.31	1.82	0	0.58	0.15	70	43	60	0	19	5	0.114	-3.139	0.000275681	0.00609782	down	NW_018744704.1	434918	438180	-	LOC110702821	--	K14209 solute carrier family 36 (proton-coupled amino acid transporter) | (RefSeq) amino acid transporter ANT1-like (A)	lysine histidine transporter-like 2 [Chenopodium quinoa]	RecName: Full=Lysine histidine transporter 1;	SubName: Full=Uncharacterized protein {ECO:0000313|EMBL:KNA08927.1};	Amino acid transporters	GO:0016021,integral component of membrane; GO:0005886,plasma membrane; GO:0015171,amino acid transmembrane transporter activity; GO:0015293,symporter activity; GO:0043090,amino acid import; GO:0080167,response to karrikin	Transmembrane amino acid transporter protein
gene-LOC110702833	0.68	0.23	0.42	0.04	0.04	0.04	33	11	20	2	2	2	0.082	-3.606	3.57359e-05	0.00105128	down	NW_018744704.1	5126063	5129650	+	LOC110702833	--	--	uncharacterized protein LOC110702833 [Chenopodium quinoa]	--	SubName: Full=Uncharacterized protein {ECO:0000313|EMBL:KMS99435.1};	--	--	Proliferating cell nuclear antigen, N-terminal domain
gene-LOC110702834	2.3	0.62	2.5	0	0	0	15	4	16	0	0	0	0.014	-6.119	7.68738e-05	0.00203502	down	NW_018744704.1	5340461	5341276	-	LOC110702834	--	--	--	--	--	--	--	--
gene-LOC110702860	0.37	0.25	0.42	0	0.03	0.03	15	10	17	0	1	1	0.042	-4.581	0.000193418	0.00448681	down	NW_018744704.1	328508	330862	+	LOC110702860	--	--	--	--	--	--	--	--
gene-LOC110702885	2.14	1.78	2.75	0	0	0	87	71	110	0	0	0	0.002	-9.105	1.11662e-13	1.39824e-11	down	NW_018744704.1	1557572	1560504	-	LOC110702885	--	--	--	--	--	--	--	--
gene-LOC110702905	10.6	10.79	14.42	7.96	8.71	3.65	180	180	241	126	144	60	0.474	-1.078	0.00173176	0.0281122	down	NW_018742204.1	3967724	3969722	+	LOC110702905	--	K02951 small subunit ribosomal protein S12e | (RefSeq) 40S ribosomal protein S12-like (A)	40S ribosomal protein S12-like [Chenopodium quinoa]	RecName: Full=40S ribosomal protein S12;	RecName: Full=40S ribosomal protein S12 {ECO:0000256|RuleBase:RU000670};	40S ribosomal protein S12	GO:0005840,ribosome; GO:0003735,structural constituent of ribosome; GO:0006412,translation	Ribosomal protein L7Ae/L30e/S12e/Gadd45 family
gene-LOC110702941	0.33	0.32	0.08	0	0.01	0	25	24	6	0	1	0	0.016	-5.988	6.78058e-05	0.00184369	down	NW_018744704.1	4558460	4576585	+	LOC110702941	--	--	--	--	--	--	--	--
gene-LOC110702995	18.22	14.11	14.48	7.99	8.43	5.69	284	216	222	116	128	86	0.39	-1.36	4.59268e-06	0.000169903	down	NW_018742204.1	4085034	4086791	+	LOC110702995	--	K02951 small subunit ribosomal protein S12e | (RefSeq) 40S ribosomal protein S12-like (A)	40S ribosomal protein S12-like [Chenopodium quinoa]	RecName: Full=40S ribosomal protein S12;	RecName: Full=40S ribosomal protein S12 {ECO:0000256|RuleBase:RU000670};	40S ribosomal protein S12	GO:0005840,ribosome; GO:0003735,structural constituent of ribosome; GO:0006412,translation	Ribosomal protein L7Ae/L30e/S12e/Gadd45 family
gene-LOC110703125	0.87	0.91	0.75	0.03	0	0	33	34	28	1	0	0	0.01	-6.702	2.77013e-07	1.29071e-05	down	NW_018744718.1	2671362	2673263	+	LOC110703125	--	K10268 F-box and leucine-rich repeat protein 2/20 | (RefSeq) F-box/LRR-repeat protein 3-like (A)	F-box/LRR-repeat protein 3-like [Chenopodium quinoa]	RecName: Full=EIN3-binding F-box protein 1; AltName: Full=F-box/LRR-repeat protein 6;	SubName: Full=Uncharacterized protein {ECO:0000313|EMBL:KNA05739.1};	Leucine rich repeat proteins, some proteins contain F-box	GO:0005634,nucleus; GO:0009873,ethylene-activated signaling pathway; GO:0010105,negative regulation of ethylene-activated signaling pathway; GO:0016567,protein ubiquitination; GO:0009723,response to ethylene; GO:0006511,ubiquitin-dependent protein catabolic process	F-box-like
gene-LOC110703146	34.06	91.63	11.66	9.52	6.72	8.28	484	1279	163	126	93	114	0.134	-2.895	6.17761e-05	0.00170285	down	NW_018744718.1	144471	145459	-	LOC110703146	--	K14771 U3 small nucleolar RNA-associated protein 19 | (RefSeq) uncharacterized LOC104415908 (A)	EG45-like domain containing protein [Chenopodium quinoa]	RecName: Full=EG45-like domain containing protein; AltName: Full=Blight-associated protein p12; AltName: Full=Plant natriuretic peptide; Short=PNP; Flags: Precursor;	SubName: Full=Uncharacterized protein {ECO:0000313|EMBL:KNA16851.1};	--	GO:0005576,extracellular region	Lytic transglycolase
gene-LOC110703158	3.79	2.4	2.84	0	0	0	53	33	39	0	0	0	0.004	-8.034	4.66926e-10	3.52668e-08	down	NW_018742204.1	4171951	4173051	-	LOC110703158	--	--	--	--	--	--	--	--
gene-LOC110703211	0.56	0.34	0.91	0	0	0	40	24	64	0	0	0	0.004	-7.994	6.12315e-10	4.52602e-08	down	NW_018744718.1	430267	434958	-	LOC110703211	--	K07478 putative ATPase | (RefSeq) ATPase WRNIP1 (A)	uncharacterized protein LOC110703211 isoform X1 [Chenopodium quinoa]	--	SubName: Full=Uncharacterized protein {ECO:0000313|EMBL:KMS97644.1};	--	--	Myb/SANT-like DNA-binding domain
gene-LOC110703345	2.46	4.66	3.94	1.46	2.03	2.09	56	104	88	31	45	46	0.417	-1.261	0.00294258	0.0423498	down	NW_018744718.1	2290196	2293076	-	LOC110703345	--	--	uncharacterized protein LOC110703345 [Chenopodium quinoa]	--	SubName: Full=Uncharacterized protein {ECO:0000313|EMBL:KNA11572.1};	--	--	Late embryogenesis abundant protein
gene-LOC110703389	1.09	1.15	0.43	0.02	0.16	0.02	49	51	19	1	7	1	0.059	-4.085	5.36142e-06	0.000194931	down	NW_018744718.1	2815358	2821494	-	LOC110703389	--	--	uncharacterized protein LOC110703389 [Chenopodium quinoa]	--	SubName: Full=Uncharacterized protein {ECO:0000313|EMBL:KNA22728.1};	--	--	--
gene-LOC110703406	32.01	33.97	28.45	17.01	13.33	2.49	1273	1327	1113	630	516	96	0.28	-1.838	0.00195214	0.0308094	down	NW_018744718.1	3028089	3030866	+	LOC110703406	--	K19891 glucan endo-1,3-beta-glucosidase 1/2/3 [EC:3.2.1.39] | (RefSeq) hypothetical protein (A)	probable glucan endo-1,3-beta-glucosidase A6 [Chenopodium quinoa]	RecName: Full=Probable glucan endo-1,3-beta-glucosidase A6; EC=3.2.1.39; AltName: Full=(1->3)-beta-glucan endohydrolase; Short=(1->3)-beta-glucanase; AltName: Full=Anther-specific protein A6; AltName: Full=Beta-1,3-endoglucanase; AltName: Full=Protein MATERNAL EFFECT EMBRYO ARREST 48 {ECO:0000303|PubMed:15634699}; Flags: Precursor;	SubName: Full=Uncharacterized protein {ECO:0000313|EMBL:KNA19429.1};	--	GO:0046658,anchored component of plasma membrane; GO:0042973,glucan endo-1,3-beta-D-glucosidase activity; GO:0004553,hydrolase activity, hydrolyzing O-glycosyl compounds; GO:0030247,polysaccharide binding; GO:0005975,carbohydrate metabolic process; GO:0006952,defense response; GO:0009793,embryo development ending in seed dormancy; GO:0010584,pollen exine formation	Glycosyl hydrolases family 17
gene-LOC110703516	14.83	8.2	12.97	5.79	6.7	5.5	784	426	675	285	345	282	0.423	-1.242	9.28113e-07	3.94754e-05	down	NW_018744722.1	207522	233291	-	LOC110703516	--	K16900 two pore calcium channel protein, plant | (RefSeq) LOW QUALITY PROTEIN: two pore calcium channel protein 1B-like (A)	LOW QUALITY PROTEIN: two pore calcium channel protein 1B-like [Chenopodium quinoa]	RecName: Full=Two pore calcium channel protein 1A; AltName: Full=Voltage-dependent calcium channel protein TPC1A; Short=NtTPC1A;	SubName: Full=Uncharacterized protein {ECO:0000313|EMBL:KNA19477.1};	Voltage-gated Ca2+ channels, alpha1 subunits	GO:0016021,integral component of membrane; GO:0005509,calcium ion binding; GO:0005245,voltage-gated calcium channel activity; GO:0006952,defense response; GO:0034765,regulation of ion transmembrane transport	Ion transport protein
gene-LOC110703583	6.87	26.42	4.71	1.17	0.96	4.35	132	499	89	21	18	81	0.133	-2.91	0.000672628	0.0130371	down	NW_018744745.1	7782	9391	-	LOC110703583	--	K03094 S-phase kinase-associated protein 1 | (RefSeq) SKP1-like protein 1A (A)	SKP1-like protein 1A [Chenopodium quinoa]	RecName: Full=SKP1-like protein 4; Short=AtSK4;	SubName: Full=SKP1 component {ECO:0000313|EMBL:OMO97849.1};	SCF ubiquitin ligase, Skp1 component	GO:0005737,cytoplasm; GO:0005730,nucleolus; GO:0005634,nucleus; GO:0019005,SCF ubiquitin ligase complex; GO:0016567,protein ubiquitination; GO:0006511,ubiquitin-dependent protein catabolic process	Skp1 family, dimerisation domain
gene-LOC110703588	0.88	0.15	1.08	0	0	0	30	5	36	0	0	0	0.007	-7.109	2.09007e-06	8.28779e-05	down	NW_018744745.1	515754	518779	+	LOC110703588	--	--	uncharacterized protein LOC110703588 [Chenopodium quinoa]	--	SubName: Full=Uncharacterized protein {ECO:0000313|EMBL:KNA02738.1}; Flags: Fragment;	--	--	--
gene-LOC110703602	0.75	2.41	0.33	0.06	0.06	0.38	39	123	17	3	3	19	0.111	-3.168	0.00184112	0.0295487	down	NW_018742393.1	2084145	2086917	-	LOC110703602	--	--	--	--	--	--	--	--
gene-LOC110703621	0.54	0.26	0.74	0	0.03	0.13	17	8	23	0	1	4	0.096	-3.386	0.00101685	0.0183278	down	NW_018744745.1	934146	944942	-	LOC110703621	--	--	--	--	--	--	--	--
gene-LOC110703622	0.17	0.53	0.15	0.02	0.02	0	9	28	8	1	1	0	0.035	-4.837	0.00047844	0.00977079	down	NW_018744745.1	966651	970461	+	LOC110703622	--	K06883 uncharacterized protein | (RefSeq) LOW QUALITY PROTEIN: uncharacterized protein LOC104799061 (A)	cysteine-rich receptor-like protein kinase 14 [Chenopodium quinoa]	RecName: Full=Cysteine-rich receptor-like protein kinase 25; Short=Cysteine-rich RLK25; EC=2.7.11.-; Flags: Precursor;	SubName: Full=Uncharacterized protein {ECO:0000313|EMBL:KDP20816.1};	--	GO:0016021,integral component of membrane; GO:0005886,plasma membrane; GO:0005524,ATP binding; GO:0004674,protein serine/threonine kinase activity; GO:0042742,defense response to bacterium; GO:0006468,protein phosphorylation	Protein kinase domain
gene-LOC110703634	2.23	2.01	3.06	0	0	0	150	133	203	0	0	0	0.001	-9.964	1.9458e-16	3.57831e-14	down	NW_018744745.1	1445807	1453066	+	LOC110703634	--	--	--	--	--	--	--	--
gene-LOC110703646	0.8	0.99	0.49	0.15	0.21	0.21	23	28	14	4	6	6	0.203	-2.299	0.00108848	0.0192722	down	NW_018744745.1	1715739	1722654	+	LOC110703646	--	K01176 alpha-amylase [EC:3.2.1.1] | (RefSeq) probable alpha-amylase 2 (A)	probable alpha-amylase 2 [Chenopodium quinoa]	RecName: Full=Probable alpha-amylase 2; Short=AtAMY2; EC=3.2.1.1 {ECO:0000250|UniProtKB:P00693}; AltName: Full=1,4-alpha-D-glucan glucanohydrolase;	RecName: Full=Alpha-amylase {ECO:0000256|PIRNR:PIRNR001028}; EC=3.2.1.1 {ECO:0000256|PIRNR:PIRNR001028}; AltName: Full=1,4-alpha-D-glucan glucanohydrolase {ECO:0000256|PIRNR:PIRNR001028};	Alpha-amylase	GO:0005829,cytosol; GO:0005576,extracellular region; GO:0004556,alpha-amylase activity; GO:0103025,alpha-amylase activity (releasing maltohexaose); GO:0005509,calcium ion binding; GO:0005975,carbohydrate metabolic process	Alpha-amylase C-terminal beta-sheet domain
gene-LOC110703677	0.49	0.64	0.1	0.06	0.06	0.04	25	32	5	3	3	2	0.102	-3.296	0.000937776	0.0171709	down	NW_018744745.1	977810	980348	+	LOC110703677	--	K13416 brassinosteroid insensitive 1-associated receptor kinase 1 [EC:2.7.10.1 2.7.11.1] | (RefSeq) BRASSINOSTEROID INSENSITIVE 1-associated receptor kinase 1-like (A)	LOW QUALITY PROTEIN: G-type lectin S-receptor-like serine/threonine-protein kinase LECRK3, partial [Chenopodium quinoa]	RecName: Full=G-type lectin S-receptor-like serine/threonine-protein kinase LECRK3 {ECO:0000305}; Short=OsLecRK3 {ECO:0000303|PubMed:25485617}; EC=2.7.11.1 {ECO:0000305}; AltName: Full=OsRLCK135 {ECO:0000303|PubMed:19825577}; Flags: Precursor;	SubName: Full=Uncharacterized protein {ECO:0000313|EMBL:ONH99250.1};	--	GO:0016021,integral component of membrane; GO:0005886,plasma membrane; GO:0005524,ATP binding; GO:0030246,carbohydrate binding; GO:0004674,protein serine/threonine kinase activity; GO:0006952,defense response; GO:0006468,protein phosphorylation	Protein kinase domain
gene-LOC110703723	0.48	0.12	0.49	0	0	0	8	2	8	0	0	0	0.028	-5.164	0.00347319	0.0481303	down	NW_018744757.1	1666153	1667468	+	LOC110703723	--	--	--	--	--	--	--	--
gene-LOC110703737	2.1	2.52	3.55	0	0	0	60	71	100	0	0	0	0.002	-8.894	7.96059e-13	9.12758e-11	down	NW_018744757.1	1730719	1734343	-	LOC110703737	--	--	--	--	--	--	--	--
gene-LOC110703738	10.72	6.9	16.23	0	0	0.04	302	191	450	0	0	1	0.001	-9.921	4.2802e-16	7.40611e-14	down	NW_018744757.1	1746567	1749684	+	LOC110703738	--	K00025 malate dehydrogenase [EC:1.1.1.37] | (RefSeq) malate dehydrogenase, cytoplasmic-like isoform X1 (A)	malate dehydrogenase, cytoplasmic-like isoform X1 [Chenopodium quinoa]	RecName: Full=Malate dehydrogenase, cytoplasmic; EC=1.1.1.37;	RecName: Full=Malate dehydrogenase {ECO:0000256|RuleBase:RU003405}; EC=1.1.1.37 {ECO:0000256|RuleBase:RU003405};	Malate dehydrogenase	GO:0005737,cytoplasm; GO:0030060,L-malate dehydrogenase activity; GO:0005975,carbohydrate metabolic process; GO:0006108,malate metabolic process; GO:0006099,tricarboxylic acid cycle	lactate/malate dehydrogenase, NAD binding domain
gene-LOC110703817	2.91	2.05	5.68	0.09	0.07	0.08	217	150	417	6	5	6	0.02	-5.648	2.92152e-30	2.64794e-27	down	NW_018744784.1	250625	260353	+	LOC110703817	--	--	--	--	--	--	--	--
gene-LOC110703820	1.85	5.23	1.97	0	0.03	0	66	183	69	0	1	0	0.003	-8.527	3.26404e-10	2.53059e-08	down	NW_018744784.1	282779	285610	-	LOC110703820	--	K21435 ankyrin repeat domain-containing protein 6 | (RefSeq) mucin-17-like (A)	ankyrin repeat-containing protein NPR4-like [Chenopodium quinoa]	RecName: Full=Ankyrin repeat-containing protein BDA1 {ECO:0000305}; AltName: Full=Protein BIAN DA 1 {ECO:0000303|PubMed:22740615};	SubName: Full=Uncharacterized protein {ECO:0000313|EMBL:KNA11865.1};	FOG: Ankyrin repeat	GO:0016021,integral component of membrane; GO:0005886,plasma membrane; GO:0045087,innate immune response; GO:0009751,response to salicylic acid	Ankyrin repeats (3 copies)
gene-LOC110703841	2.05	2.55	2.32	0.24	0.39	0.39	27	33	30	3	5	5	0.123	-3.022	1.27026e-06	5.25028e-05	down	NW_018744790.1	1374437	1375190	+	LOC110703841	--	--	--	--	--	--	--	--
gene-LOC110704124	6.72	9.33	2.36	1.8	0.99	1.73	104	142	36	26	15	26	0.193	-2.372	0.000375469	0.00796266	down	NW_018744821.1	1684506	1685280	+	LOC110704124	--	--	uncharacterized protein LOC110704124 [Chenopodium quinoa]	--	SubName: Full=Acyl-CoA N-acyltransferases (NAT) superfamily protein, putative {ECO:0000313|EMBL:EOY05722.1};	--	GO:0008080,N-acetyltransferase activity	Acetyltransferase (GNAT) domain
gene-LOC110704126	0.85	0.86	0.86	0	0	0	9	9	9	0	0	0	0.018	-5.831	0.000118009	0.00294767	down	NW_018744821.1	1773154	1773684	+	LOC110704126	--	--	uncharacterized protein LOC110704126 [Chenopodium quinoa]	--	SubName: Full=Uncharacterized protein {ECO:0000313|EMBL:CCA66036.1};	FOG: Reverse transcriptase	GO:0003676,nucleic acid binding	zinc-binding in reverse transcriptase
gene-LOC110704197	4.87	4.63	6.89	2.59	3.03	2.83	337	315	469	167	204	190	0.44	-1.185	1.38296e-10	1.14695e-08	down	NW_018744821.1	3366584	3383244	+	LOC110704197	--	K03352 anaphase-promoting complex subunit 5 | (RefSeq) anaphase-promoting complex subunit 5-like isoform X1 (A)	anaphase-promoting complex subunit 5-like isoform X1 [Chenopodium quinoa]	RecName: Full=Anaphase-promoting complex subunit 5; AltName: Full=Cyclosome subunit 5;	SubName: Full=Uncharacterized protein {ECO:0000313|EMBL:KNA12941.1};	Anaphase-promoting complex (APC), subunit 5	GO:0005634,nucleus; GO:0007049,cell cycle; GO:0051301,cell division; GO:0016567,protein ubiquitination	Anaphase-promoting complex subunit 5
gene-LOC110704284	4.66	4.34	8.21	0.6	0.37	0.53	117	107	203	14	9	13	0.076	-3.717	2.14277e-21	8.15688e-19	down	NW_018744830.1	432540	434557	+	LOC110704284	--	K02218 casein kinase 1 [EC:2.7.11.1] | (RefSeq) uncharacterized protein LOC8069780 (A)	uncharacterized protein LOC110704284 [Chenopodium quinoa]	RecName: Full=Protein ALP1-like {ECO:0000305}; EC=3.1.-.-;	SubName: Full=Uncharacterized protein {ECO:0000313|EMBL:KNA24023.1};	Predicted transposase	GO:0005634,nucleus; GO:0046872,metal ion binding; GO:0004518,nuclease activity	DDE superfamily endonuclease
gene-LOC110704317	6.97	6.53	9.58	0.19	0.18	0.07	202	186	273	5	5	2	0.016	-5.975	1.22456e-34	1.60742e-31	down	NW_018744830.1	434560	436663	+	LOC110704317	--	--	uncharacterized protein LOC110704317 [Chenopodium quinoa]	--	SubName: Full=Uncharacterized protein {ECO:0000313|EMBL:KNA03862.1}; Flags: Fragment;	--	--	--
gene-LOC110704394	42.04	94.14	16.54	0	0	0	625	1375	242	0	0	0	0	-12.351	1.85543e-12	2.01802e-10	down	NW_018744835.1	1889488	1890231	+	LOC110704394	--	K01193 beta-fructofuranosidase [EC:3.2.1.26] | (RefSeq) LOC109747879; beta-fructofuranosidase, insoluble isoenzyme 3-like (A)	UPF0481 protein At3g47200-like [Chenopodium quinoa]	RecName: Full=UPF0481 protein At3g47200;	SubName: Full=Uncharacterized protein {ECO:0000313|EMBL:KNA05600.1};	--	GO:0016021,integral component of membrane; GO:0005886,plasma membrane	Plant protein of unknown function
gene-LOC110704421	3.23	3.19	2.04	1.32	1.26	1.46	137	133	85	52	52	60	0.388	-1.367	0.000945069	0.0172712	down	NW_018744835.1	480191	483215	-	LOC110704421	--	K08900 mitochondrial chaperone BCS1 | (RefSeq) AAA-ATPase ASD, mitochondrial-like (A)	AAA-ATPase At3g28580-like [Chenopodium quinoa]	RecName: Full=AAA-ATPase At3g28580; EC=3.6.1.3 {ECO:0000250|UniProtKB:Q9FLD5};	SubName: Full=Uncharacterized protein {ECO:0000313|EMBL:KNA12944.1};	AAA+-type ATPase	GO:0005783,endoplasmic reticulum; GO:0016021,integral component of membrane; GO:0005524,ATP binding; GO:0016887,ATPase activity; GO:0009737,response to abscisic acid; GO:0000304,response to singlet oxygen	Domain associated at C-terminal with AAA
gene-LOC110704422	5.86	4.72	2.45	1.78	1.11	2.16	216	171	89	61	40	77	0.316	-1.664	0.00159379	0.026249	down	NW_018744835.1	491882	494503	-	LOC110704422	--	K08900 mitochondrial chaperone BCS1 | (RefSeq) AAA-ATPase ASD, mitochondrial-like (A)	AAA-ATPase At3g28580-like [Chenopodium quinoa]	RecName: Full=AAA-ATPase At3g28580; EC=3.6.1.3 {ECO:0000250|UniProtKB:Q9FLD5};	SubName: Full=Uncharacterized protein {ECO:0000313|EMBL:KNA12944.1};	AAA+-type ATPase	GO:0005783,endoplasmic reticulum; GO:0016021,integral component of membrane; GO:0005524,ATP binding; GO:0016887,ATPase activity; GO:0009737,response to abscisic acid; GO:0000304,response to singlet oxygen	Domain associated at C-terminal with AAA
gene-LOC110704424	0.12	0.84	0.02	0	0	0	5	34	1	0	0	0	0.01	-6.612	0.000731365	0.0139344	down	NW_018744835.1	540417	544971	+	LOC110704424	--	K08900 mitochondrial chaperone BCS1 | (RefSeq) AAA-ATPase ASD, mitochondrial-like (A)	AAA-ATPase At3g28580-like [Chenopodium quinoa]	RecName: Full=AAA-ATPase At3g28580; EC=3.6.1.3 {ECO:0000250|UniProtKB:Q9FLD5};	SubName: Full=Uncharacterized protein {ECO:0000313|EMBL:KNA17203.1};	AAA+-type ATPase	GO:0005783,endoplasmic reticulum; GO:0016021,integral component of membrane; GO:0005524,ATP binding; GO:0016887,ATPase activity; GO:0009737,response to abscisic acid; GO:0000304,response to singlet oxygen	Domain associated at C-terminal with AAA
gene-LOC110704564	1.52	1.34	1.63	0.72	0.57	0.6	68	59	72	30	25	26	0.355	-1.493	1.62115e-05	0.000527006	down	NW_018744845.1	732315	741250	-	LOC110704564	--	K08101 phytochromobilin:ferredoxin oxidoreductase [EC:1.3.7.4] | (RefSeq) phytochromobilin:ferredoxin oxidoreductase, chloroplastic-like (A)	phytochromobilin:ferredoxin oxidoreductase, chloroplastic-like [Chenopodium quinoa]	RecName: Full=Phytochromobilin:ferredoxin oxidoreductase, chloroplastic; EC=1.3.7.4; AltName: Full=PFB synthase; AltName: Full=PPhiB synthase; AltName: Full=Phytochromobilin synthase; Flags: Precursor;	SubName: Full=Uncharacterized protein {ECO:0000313|EMBL:KNA09847.1};	--	GO:0009507,chloroplast; GO:0050897,cobalt ion binding; GO:0050619,phytochromobilin:ferredoxin oxidoreductase activity; GO:0010019,chloroplast-nucleus signaling pathway; GO:0010024,phytochromobilin biosynthetic process	Ferredoxin-dependent bilin reductase
gene-LOC110704756	0.99	1.36	1.96	0	0	0	20	27	39	0	0	0	0.006	-7.464	1.43427e-08	8.41271e-07	down	NW_018744858.1	591621	611736	+	LOC110704756	--	--	--	--	--	--	--	--
gene-LOC110704773	16.92	23.05	14.11	10.34	8.96	9.17	541	724	444	308	279	284	0.425	-1.234	0.000857933	0.0159002	down	NW_018744858.1	1290222	1302477	+	LOC110704773	--	--	uncharacterized protein LOC110704773 [Chenopodium quinoa]	RecName: Full=Glutamyl-tRNA reductase-binding protein, chloroplastic {ECO:0000303|PubMed:22180625}; Short=AtGluTRBP {ECO:0000303|PubMed:22180625}; Short=GluTR-binding protein {ECO:0000303|PubMed:22180625}; AltName: Full=Protein PROTON GRADIENT REGULATION 7 {ECO:0000303|PubMed:20657737}; Flags: Precursor;	SubName: Full=Uncharacterized protein {ECO:0000313|EMBL:KNA16528.1};	--	GO:0009507,chloroplast; GO:0009570,chloroplast stroma; GO:0009534,chloroplast thylakoid; GO:0043234,NA; GO:0048037,cofactor binding; GO:0043495,protein membrane anchor; GO:0015995,chlorophyll biosynthetic process; GO:0006783,heme biosynthetic process; GO:0009767,photosynthetic electron transport chain; GO:0070455,positive regulation of heme biosynthetic process; GO:0009791,post-embryonic developm…	Protein of unknown function (DUF2470)
gene-LOC110704785	3.96	10.96	5.24	0.64	1.84	3.04	86	234	112	13	39	64	0.219	-2.19	0.00123498	0.0213268	down	NW_018744858.1	1715731	1724209	+	LOC110704785	--	--	uncharacterized protein LOC110704785 [Chenopodium quinoa]	--	SubName: Full=Uncharacterized protein {ECO:0000313|EMBL:KNA22237.1};	--	--	--
gene-LOC110704874	63.64	139.91	37.57	32.01	22.86	19.13	1095	2365	636	513	383	319	0.236	-2.084	0.000305649	0.00669456	down	NW_018742410.1	40380	41607	-	LOC110704874	--	--	uncharacterized protein LOC110704874 [Chenopodium quinoa]	--	SubName: Full=Uncharacterized protein {ECO:0000313|EMBL:KNA05593.1};	--	GO:0005634,nucleus; GO:0003677,DNA binding; GO:0008270,zinc ion binding; GO:0045893,positive regulation of transcription, DNA-templated	GATA-type transcription activator, N-terminal
gene-LOC110704935	0.66	1.1	0.19	0.05	0.06	0.08	43	71	12	3	4	5	0.075	-3.738	2.10845e-05	0.000666078	down	NW_018744874.1	116541	120476	+	LOC110704935	--	K09753 cinnamoyl-CoA reductase [EC:1.2.1.44] | (RefSeq) cinnamoyl-CoA reductase 1-like isoform X1 (A)	F-box/LRR-repeat protein At2g42720-like [Chenopodium quinoa]	RecName: Full=Putative FBD-associated F-box protein At5g56440;	SubName: Full=Uncharacterized protein {ECO:0000313|EMBL:KMS97958.1};	FOG: Transposon-encoded proteins with TYA, reverse transcriptase, integrase domains in various combinations	--	F-box domain
gene-LOC110704988	0.3	0.32	0.26	0.12	0.02	0.04	16	17	14	6	1	2	0.166	-2.59	0.00272577	0.0400625	down	NW_018744874.1	676440	679379	-	LOC110704988	--	--	--	--	--	--	--	--
gene-LOC110705197	1.31	0.69	1.46	0	0	0	31	16	34	0	0	0	0.006	-7.361	2.73237e-08	1.54322e-06	down	NW_018744874.1	2710459	2712646	+	LOC110705197	--	--	--	--	--	--	--	--
gene-LOC110705234	145.5	132.23	173.57	57.93	70.95	57.79	4571	4081	5365	1695	2170	1759	0.348	-1.523	2.71038e-26	1.81011e-23	down	NW_018744874.1	3179624	3185126	-	LOC110705234	--	--	uncharacterized protein LOC110705234 [Chenopodium quinoa]	--	--	--	--	Kelch motif
gene-LOC110705268	9.4	6.12	10.45	1.3	1.37	0.34	311	199	340	40	44	11	0.097	-3.363	6.6625e-14	8.56829e-12	down	NW_018742410.1	471097	475753	+	LOC110705268	--	K00759 adenine phosphoribosyltransferase [EC:2.4.2.7] | (RefSeq) adenine phosphoribosyltransferase 5-like isoform X1 (A)	adenine phosphoribosyltransferase 5-like isoform X1 [Chenopodium quinoa]	RecName: Full=Adenine phosphoribosyltransferase 2; Short=APRT 2; Short=AtAPT2; EC=2.4.2.7;	SubName: Full=Uncharacterized protein {ECO:0000313|EMBL:KNA09788.1};	Adenine phosphoribosyl transferases	GO:0005829,cytosol; GO:0005794,Golgi apparatus; GO:0005886,plasma membrane; GO:0003999,adenine phosphoribosyltransferase activity; GO:0015114,phosphate ion transmembrane transporter activity; GO:0006168,adenine salvage; GO:0044209,AMP salvage; GO:0006166,purine ribonucleoside salvage	Phosphoribosyl transferase domain
gene-LOC110705289	4.75	10.31	2.71	1.25	1.03	0.82	114	243	64	28	24	19	0.134	-2.903	4.71314e-06	0.000173014	down	NW_018744878.1	898476	899928	+	LOC110705289	--	K13424 WRKY transcription factor 33 | (RefSeq) probable WRKY transcription factor 33 (A)	probable WRKY transcription factor 50 isoform X1 [Chenopodium quinoa]	RecName: Full=Probable WRKY transcription factor 50; AltName: Full=WRKY DNA-binding protein 50;	SubName: Full=Uncharacterized protein {ECO:0000313|EMBL:KNA14459.1};	--	GO:0005634,nucleus; GO:0003700,DNA-binding transcription factor activity; GO:0043565,sequence-specific DNA binding; GO:0050832,defense response to fungus; GO:0009867,jasmonic acid mediated signaling pathway; GO:0006351,transcription, DNA-templated	WRKY DNA -binding domain
gene-LOC110705307	0.48	0.72	0.23	0.06	0.06	0.12	17	25	8	2	2	4	0.131	-2.937	0.00149795	0.0249442	down	NW_018744878.1	3143445	3146376	-	LOC110705307	--	K21435 ankyrin repeat domain-containing protein 6 | (RefSeq) mucin-17-like (A)	ankyrin repeat-containing protein At5g02620-like [Chenopodium quinoa]	RecName: Full=Ankyrin repeat-containing protein At2g01680;	SubName: Full=Uncharacterized protein {ECO:0000313|EMBL:KNA11865.1};	FOG: Ankyrin repeat	GO:0016021,integral component of membrane; GO:0005886,plasma membrane	Ankyrin repeats (3 copies)
gene-LOC110705375	12.7	15.89	9.66	6.72	2.51	2.77	270	332	202	133	52	57	0.255	-1.969	0.000162478	0.00388264	down	NW_018744878.1	518595	522186	+	LOC110705375	--	--	uncharacterized protein LOC110705375 isoform X1 [Chenopodium quinoa]	--	SubName: Full=Uncharacterized protein {ECO:0000313|EMBL:KNA12797.1};	--	--	--
gene-LOC110705382	45.4	61.53	27.45	26.78	14.45	18.03	881	1173	524	484	273	339	0.353	-1.504	0.00190216	0.0301706	down	NW_018744878.1	650283	653810	-	LOC110705382	--	--	NAD(P)H-quinone oxidoreductase subunit U, chloroplastic-like [Chenopodium quinoa]	RecName: Full=NAD(P)H-quinone oxidoreductase subunit U, chloroplastic {ECO:0000305}; EC=1.6.5.- {ECO:0000305}; AltName: Full=NAD(P)H dehydrogenase subunit U {ECO:0000303|PubMed:21785130}; Short=NDH subunit U {ECO:0000305}; AltName: Full=NADH-plastoquinone oxidoreductase subunit U {ECO:0000305}; AltName: Full=Protein CHLORORESPIRATORY REDUCTION L {ECO:0000303|PubMed:21505067}; Flags: Precursor;	SubName: Full=Uncharacterized protein {ECO:0000313|EMBL:KNA13470.1};	--	GO:0009507,chloroplast; GO:0009535,chloroplast thylakoid membrane; GO:0016021,integral component of membrane; GO:0010598,NAD(P)H dehydrogenase complex (plastoquinone); GO:0016491,oxidoreductase activity; GO:0048038,quinone binding	DnaJ domain
gene-LOC110705419	1.18	2.18	1.02	0.32	0.54	0.75	47	85	40	12	21	29	0.296	-1.758	0.00311194	0.0441529	down	NW_018744878.1	1141231	1143215	-	LOC110705419	--	--	PREDICTED: uncharacterized protein LOC108465638 [Gossypium arboreum]	--	SubName: Full=Uncharacterized protein {ECO:0000313|EMBL:EOD11390.1, ECO:0000313|EnsemblProtists:EOD11390}; Flags: Fragment;	--	--	--
gene-LOC110705547	0.3	2.19	0.12	0	0.07	0	13	92	5	0	3	0	0.019	-5.717	0.000178901	0.00420644	down	NW_018744878.1	3103420	3107010	-	LOC110705547	--	K21435 ankyrin repeat domain-containing protein 6 | (RefSeq) uncharacterized protein LOC114406990 (A)	ankyrin repeat-containing protein At2g01680-like [Chenopodium quinoa]	RecName: Full=Ankyrin repeat-containing protein At2g01680;	SubName: Full=Uncharacterized protein {ECO:0000313|EMBL:KNA11865.1};	FOG: Ankyrin repeat	GO:0016021,integral component of membrane; GO:0005886,plasma membrane	Ankyrin repeats (3 copies)
gene-LOC110705589	0.78	0.19	2.55	0.14	0.3	0.13	30	7	96	5	11	5	0.152	-2.719	0.00135444	0.022997	down	NW_018744878.1	3736806	3741762	-	LOC110705589	--	--	uncharacterized protein LOC110705589 isoform X1 [Chenopodium quinoa]	--	SubName: Full=Uncharacterized protein {ECO:0000313|EMBL:KNA08668.1};	--	GO:0046872,metal ion binding	--
gene-LOC110705596	21.96	4.07	27.57	0	0.36	0.72	505	92	624	0	8	16	0.018	-5.758	1.61922e-05	0.000526826	down	NW_018744878.1	3787644	3790786	-	LOC110705596	--	K07870 mitochondrial Rho GTPase 1 [EC:3.6.5.-] | (RefSeq) uncharacterized protein LOC103958384 (A)	bark storage protein A-like [Chenopodium quinoa]	RecName: Full=Bark storage protein A; Flags: Precursor;	SubName: Full=uncharacterized protein LOC109007371 isoform X2 {ECO:0000313|RefSeq:XP_018842573.1};	--	GO:0003824,catalytic activity; GO:0045735,nutrient reservoir activity; GO:0009116,nucleoside metabolic process	Phosphorylase superfamily
gene-LOC110705616	1.19	2.01	3.86	0.64	1.09	0.73	44	73	140	22	39	26	0.302	-1.727	0.00015515	0.00372859	down	NW_018744878.1	4162780	4167115	+	LOC110705616	--	K14454 aspartate aminotransferase, cytoplasmic [EC:2.6.1.1] | (RefSeq) aspartate aminotransferase, cytoplasmic-like (A)	aspartate aminotransferase, cytoplasmic-like [Chenopodium quinoa]	RecName: Full=Aspartate aminotransferase 3, chloroplastic; EC=2.6.1.1; AltName: Full=Protein YELLOW-LEAF-SPECIFIC GENE 4; AltName: Full=Transaminase A; Flags: Precursor;	RecName: Full=Aspartate aminotransferase {ECO:0000256|RuleBase:RU000480}; EC=2.6.1.1 {ECO:0000256|RuleBase:RU000480};	Aspartate aminotransferase/Glutamic oxaloacetic transaminase AAT1/GOT2	GO:0009507,chloroplast; GO:0016020,membrane; GO:0005777,peroxisome; GO:0009536,plastid; GO:0004069,L-aspartate:2-oxoglutarate aminotransferase activity; GO:0080130,L-phenylalanine:2-oxoglutarate aminotransferase activity; GO:0030170,pyridoxal phosphate binding; GO:0006103,2-oxoglutarate metabolic process; GO:0006531,aspartate metabolic process; GO:0009058,biosynthetic process; GO:0006536,glutamat…	Aminotransferase class I and II
gene-LOC110705633	56.98	119.86	5.36	1.19	0	1.91	616	1273	57	12	0	20	0.013	-6.236	0.000402324	0.00843353	down	NW_018744878.1	4327708	4332133	+	LOC110705633	--	--	dormancy-associated protein 2-like [Chenopodium quinoa]	--	--	--	--	Glycine rich protein family
gene-LOC110705793	1.01	1.47	1.56	0.23	0.18	0.34	65	93	99	14	11	21	0.156	-2.677	3.37293e-09	2.16887e-07	down	NW_018744878.1	6137553	6141541	-	LOC110705793	--	K13435 serine/threonine-protein kinase Pto | (RefSeq) Pto; serine/threonine protein kinase Pto (A)	receptor-like protein kinase FERONIA [Chenopodium quinoa]	RecName: Full=Receptor-like protein kinase FERONIA; EC=2.7.11.1; AltName: Full=Protein SIRENE; Flags: Precursor;	SubName: Full=Uncharacterized protein {ECO:0000313|EMBL:KNA07837.1};	Serine/threonine protein kinase	GO:0043680,filiform apparatus; GO:0016021,integral component of membrane; GO:0005622,intracellular; GO:0016020,membrane; GO:0005886,plasma membrane; GO:0009506,plasmodesma; GO:0005524,ATP binding; GO:0004672,protein kinase activity; GO:0004674,protein serine/threonine kinase activity; GO:0009738,abscisic acid-activated signaling pathway; GO:0009742,brassinosteroid mediated signaling pathway; GO:0…	Protein tyrosine kinase
gene-LOC110705797	0.62	1.81	0.57	0.27	0.16	0.16	40	115	36	16	10	10	0.151	-2.723	0.000110302	0.00279651	down	NW_018744878.1	6191950	6195947	-	LOC110705797	--	K13435 serine/threonine-protein kinase Pto | (RefSeq) Pto; serine/threonine protein kinase Pto (A)	receptor-like protein kinase FERONIA [Chenopodium quinoa]	RecName: Full=Receptor-like protein kinase FERONIA; EC=2.7.11.1; AltName: Full=Protein SIRENE; Flags: Precursor;	SubName: Full=Uncharacterized protein {ECO:0000313|EMBL:KNA07837.1};	Serine/threonine protein kinase	GO:0043680,filiform apparatus; GO:0016021,integral component of membrane; GO:0005622,intracellular; GO:0016020,membrane; GO:0005886,plasma membrane; GO:0009506,plasmodesma; GO:0005524,ATP binding; GO:0004672,protein kinase activity; GO:0004674,protein serine/threonine kinase activity; GO:0009738,abscisic acid-activated signaling pathway; GO:0009742,brassinosteroid mediated signaling pathway; GO:0…	Protein tyrosine kinase
gene-LOC110705840	26.55	43.6	19.26	17.38	8.11	11.92	269	434	192	164	80	117	0.335	-1.577	0.00259815	0.0386797	down	NW_018744878.1	3019091	3019597	+	LOC110705840	--	--	lachrymatory-factor synthase-like [Chenopodium quinoa]	RecName: Full=Lachrymatory-factor synthase; Flags: Precursor;	SubName: Full=Uncharacterized protein {ECO:0000313|EMBL:KNA14432.1};	--	GO:0005773,vacuole	Polyketide cyclase / dehydrase and lipid transport
gene-LOC110705846	1.63	0.75	2.12	0	0	0	53	24	68	0	0	0	0.003	-8.177	2.74625e-10	2.15106e-08	down	NW_018744878.1	3240137	3242569	-	LOC110705846	--	K17604 zinc finger SWIM domain-containing protein 3 | (RefSeq) protein FAR-RED IMPAIRED RESPONSE 1-like isoform X1 (A)	protein FAR-RED IMPAIRED RESPONSE 1-like [Chenopodium quinoa]	RecName: Full=Protein FAR-RED IMPAIRED RESPONSE 1;	SubName: Full=Uncharacterized protein {ECO:0000313|EMBL:EMJ00283.1}; Flags: Fragment;	--	GO:0005634,nucleus; GO:0003700,DNA-binding transcription factor activity; GO:0008270,zinc ion binding; GO:0010018,far-red light signaling pathway; GO:0042753,positive regulation of circadian rhythm; GO:0045893,positive regulation of transcription, DNA-templated; GO:0010017,red or far-red light signaling pathway; GO:0009585,red, far-red light phototransduction; GO:0010218,response to far red light…	MULE transposase domain
gene-LOC110705979	26.42	28.03	9.37	9.25	4.87	6.7	708	738	247	231	127	174	0.259	-1.95	0.000460712	0.00947484	down	NW_018742410.1	1470573	1474043	+	LOC110705979	--	K18834 WRKY transcription factor 1 | (RefSeq) WRKY transcription factor 1-like (A)	probable WRKY transcription factor 40 [Chenopodium quinoa]	RecName: Full=Probable WRKY transcription factor 40; AltName: Full=WRKY DNA-binding protein 40;	SubName: Full=Uncharacterized protein {ECO:0000313|EMBL:KNA08497.1};	--	GO:0005634,nucleus; GO:0003700,DNA-binding transcription factor activity; GO:0043565,sequence-specific DNA binding; GO:0044212,transcription regulatory region DNA binding; GO:0042742,defense response to bacterium; GO:0050832,defense response to fungus; GO:0045892,negative regulation of transcription, DNA-templated; GO:0031347,regulation of defense response; GO:0010200,response to chitin; GO:00022…	WRKY DNA -binding domain
gene-LOC110706051	3.94	2.66	4.31	2.03	0.75	1.16	119	79	128	57	22	34	0.313	-1.677	0.000205831	0.00474583	down	NW_018744895.1	2682986	2685521	+	LOC110706051	--	--	--	--	--	--	--	--
gene-LOC110706155	1.79	2.17	2.11	0	0.06	0	32	38	37	0	1	0	0.009	-6.858	9.43642e-08	4.83467e-06	down	NW_018744907.1	109890	113595	-	LOC110706155	--	--	uncharacterized protein LOC110706155 [Chenopodium quinoa]	--	SubName: Full=Uncharacterized protein {ECO:0000313|EMBL:KNA23047.1};	--	--	emp24/gp25L/p24 family/GOLD
gene-LOC110706161	6.86	11.15	7.66	0	0.22	0.17	253	404	278	0	8	6	0.012	-6.35	1.00822e-23	5.33055e-21	down	NW_018744917.1	12970	15811	-	LOC110706161	--	K21435 ankyrin repeat domain-containing protein 6 | (RefSeq) ankyrin repeat and SAM domain-containing protein 1A isoform X1 (A)	ankyrin repeat-containing protein BDA1-like [Chenopodium quinoa]	RecName: Full=Ankyrin repeat-containing protein BDA1 {ECO:0000305}; AltName: Full=Protein BIAN DA 1 {ECO:0000303|PubMed:22740615};	SubName: Full=Uncharacterized protein {ECO:0000313|EMBL:KNA11865.1};	FOG: Ankyrin repeat	GO:0016021,integral component of membrane; GO:0005886,plasma membrane; GO:0045087,innate immune response; GO:0009751,response to salicylic acid	Ankyrin repeats (3 copies)
gene-LOC110706162	4.99	5.57	7.6	0.04	0.05	0.09	296	325	444	2	3	5	0.008	-6.927	9.79205e-40	2.04334e-36	down	NW_018744917.1	6518	12654	+	LOC110706162	--	K03665 GTPase | (RefSeq) uncharacterized protein LOC110723279 (A)	uncharacterized protein LOC110706162 isoform X1 [Chenopodium quinoa]	--	SubName: Full=Uncharacterized protein {ECO:0000313|EMBL:KNA08850.1}; Flags: Fragment;	Predicted GTP binding protein	GO:0005525,GTP binding	GTP-binding GTPase N-terminal
gene-LOC110706163	0.17	0.05	0.26	0	0	0	13	4	20	0	0	0	0.014	-6.171	6.55517e-05	0.00179135	down	NW_018744917.1	20824	24923	-	LOC110706163	--	--	--	--	--	--	--	--
gene-LOC110706166	0.41	0.79	0.46	0	0	0	9	17	10	0	0	0	0.013	-6.294	2.81728e-05	0.000854925	down	NW_018744917.1	56601	59276	-	LOC110706166	--	K21435 ankyrin repeat domain-containing protein 6 | (RefSeq) ankyrin repeat and SAM domain-containing protein 1A isoform X1 (A)	ankyrin repeat-containing protein NPR4-like [Chenopodium quinoa]	RecName: Full=Ankyrin repeat-containing protein NPR4 {ECO:0000305}; Short=OsNPR4 {ECO:0000303|PubMed:17309686};	SubName: Full=Uncharacterized protein {ECO:0000313|EMBL:KNA11865.1};	FOG: Ankyrin repeat	GO:0016021,integral component of membrane; GO:0005886,plasma membrane	Ankyrin repeats (3 copies)
gene-LOC110706197	1.95	1.94	3.28	0	0	0	86	84	142	0	0	0	0.002	-9.312	3.33657e-14	4.44102e-12	down	NW_018742204.1	5834720	5837627	+	LOC110706197	--	K00799 glutathione S-transferase [EC:2.5.1.18] | (RefSeq) uncharacterized protein LOC110786294 (A)	uncharacterized protein LOC110706197 isoform X1 [Chenopodium quinoa]	--	SubName: Full=Uncharacterized protein {ECO:0000313|EMBL:CCA66054.1};	--	GO:0003676,nucleic acid binding	Reverse transcriptase-like
gene-LOC110706333	7.6	11.02	4.72	2.23	2.32	1.96	172	245	105	47	51	43	0.22	-2.188	6.09199e-06	0.00021816	down	NW_018744955.1	447303	449693	-	LOC110706333	--	--	pathogen-related protein-like [Chenopodium quinoa]	RecName: Full=Pathogen-related protein;	SubName: Full=Uncharacterized protein {ECO:0000313|EMBL:KNA04900.1};	--	GO:0006952,defense response; GO:0009607,response to biotic stimulus	SnoaL-like polyketide cyclase
gene-LOC110706423	0.46	0.28	0.86	0	0	0	20	12	37	0	0	0	0.007	-7.088	2.24829e-07	1.06849e-05	down	NW_018744955.1	367341	370107	+	LOC110706423	--	K06943 nucleolar GTP-binding protein | (RefSeq) uncharacterized protein LOC108835530 (A)	uncharacterized protein LOC110706423 [Chenopodium quinoa]	RecName: Full=Putative ribonuclease H protein At1g65750; EC=3.1.26.4;	SubName: Full=Reverse transcriptase {ECO:0000313|EMBL:OMO85295.1};	FOG: Reverse transcriptase	GO:0046872,metal ion binding; GO:0003676,nucleic acid binding; GO:0004523,RNA-DNA hybrid ribonuclease activity	Reverse transcriptase (RNA-dependent DNA polymerase)
gene-LOC110706435	1.31	2.54	4.34	0	0	0	20	38	65	0	0	0	0.004	-7.955	2.63928e-09	1.73823e-07	down	NW_018744955.1	1047184	1048096	-	LOC110706435	--	K23280 rhamnogalacturonan I rhamnosyltransferase [EC:2.4.1.351] | (RefSeq) uncharacterized protein LOC101257103 isoform X1 (A)	uncharacterized protein LOC110706435 [Chenopodium quinoa]	RecName: Full=Retrovirus-related Pol polyprotein from transposon RE2; AltName: Full=Retro element 2 {ECO:0000303|PubMed:10689195}; Short=AtRE2 {ECO:0000303|PubMed:10689195}; Includes: RecName: Full=Protease RE2; EC=3.4.23.-; Includes: RecName: Full=Reverse transcriptase RE2; EC=2.7.7.49; Includes: RecName: Full=Endonuclease RE2;	SubName: Full=uncharacterized protein LOC109113939 {ECO:0000313|RefSeq:XP_019051425.1};	--	GO:0004190,aspartic-type endopeptidase activity; GO:0004519,endonuclease activity; GO:0046872,metal ion binding; GO:0003676,nucleic acid binding; GO:0003964,RNA-directed DNA polymerase activity; GO:0015074,DNA integration; GO:0006310,DNA recombination	gag-polypeptide of LTR copia-type
gene-LOC110706613	47.12	30.52	31.84	23.96	17.43	23.89	1083	689	720	513	390	532	0.5	-1	0.00329531	0.0460678	down	NW_018744988.1	1817673	1818822	-	LOC110706613	--	K00020 3-hydroxyisobutyrate dehydrogenase [EC:1.1.1.31] | (RefSeq) 6-phosphogluconate dehydrogenase-like protein (A)	protein EXORDIUM-like [Chenopodium quinoa]	RecName: Full=Protein EXORDIUM; Flags: Precursor;	SubName: Full=Uncharacterized protein {ECO:0000313|EMBL:KNA15759.1};	--	GO:0048046,apoplast; GO:0005618,cell wall; GO:0005615,extracellular space; GO:0005794,Golgi apparatus; GO:0009505,plant-type cell wall; GO:0009741,response to brassinosteroid	Phosphate-induced protein 1 conserved region
gene-LOC110706672	5.56	6.24	4.42	2.56	2.43	3.26	294	324	230	126	125	167	0.417	-1.262	0.000606152	0.0119805	down	NW_018744988.1	2627394	2630149	-	LOC110706672	--	K13435 serine/threonine-protein kinase Pto | (RefSeq) Pto; serine/threonine protein kinase Pto (A)	probable receptor-like protein kinase At2g23200 [Chenopodium quinoa]	RecName: Full=Probable receptor-like protein kinase At2g23200; EC=2.7.11.-; Flags: Precursor;	SubName: Full=Uncharacterized protein {ECO:0000313|EMBL:KNA20919.1};	Serine/threonine protein kinase	GO:0016021,integral component of membrane; GO:0005524,ATP binding; GO:0004674,protein serine/threonine kinase activity	Protein tyrosine kinase
gene-LOC110706684	3.25	2.85	5.11	1.85	2.44	1.31	115	99	178	61	84	45	0.426	-1.23	2.49214e-05	0.000767541	down	NW_018744988.1	2800829	2802598	-	LOC110706684	--	K22422 protein downstream neighbor of Son | (RefSeq) hypothetical protein (A)	heme-binding-like protein At3g10130, chloroplastic [Chenopodium quinoa]	RecName: Full=Heme-binding-like protein At3g10130, chloroplastic; Flags: Precursor;	SubName: Full=Uncharacterized protein {ECO:0000313|EMBL:KNA20909.1};	--	GO:0009507,chloroplast; GO:0009535,chloroplast thylakoid membrane; GO:0010287,plastoglobule	SOUL heme-binding protein
gene-LOC110706790	0.87	3.95	1.23	0.48	0.68	0.43	25	112	35	13	19	12	0.2	-2.321	0.00161553	0.0265766	down	NW_018744991.1	2982580	2984022	+	LOC110706790	--	K19613 leucine-rich repeat protein SHOC2 | (RefSeq) hypothetical protein (A)	receptor-like protein 12 [Chenopodium quinoa]	RecName: Full=Receptor-like protein 9DC3 {ECO:0000312|EMBL:AAT77550.1}; Flags: Precursor;	SubName: Full=Uncharacterized protein {ECO:0000313|EMBL:CCB61737.1};	FOG: Leucine rich repeat	GO:0016021,integral component of membrane; GO:0005886,plasma membrane; GO:0050832,defense response to fungus	Leucine rich repeat
gene-LOC110706799	1.09	0.97	0.45	0	0	0	34	30	14	0	0	0	0.006	-7.422	1.39783e-07	6.92586e-06	down	NW_018744991.1	52362	53929	-	LOC110706799	--	--	uncharacterized protein LOC110706799 [Chenopodium quinoa]	--	SubName: Full=Uncharacterized protein {ECO:0000313|EMBL:KNA18541.1};	--	GO:0016021,integral component of membrane	--
gene-LOC110706843	2.24	3.89	4.37	1.79	1.96	2.13	74	126	142	55	63	68	0.473	-1.08	0.00269044	0.0396504	down	NW_018744991.1	856220	857870	-	LOC110706843	--	K01054 acylglycerol lipase [EC:3.1.1.23] | (RefSeq) caffeoylshikimate esterase-like (A)	caffeoylshikimate esterase-like [Chenopodium quinoa]	RecName: Full=Caffeoylshikimate esterase; EC=3.1.1.-; AltName: Full=Lysophospholipase 2; Short=LysoPL2;	SubName: Full=Uncharacterized protein {ECO:0000313|EMBL:KNA06122.1}; Flags: Fragment;	Lysophospholipase	GO:0005783,endoplasmic reticulum; GO:0005794,Golgi apparatus; GO:0005886,plasma membrane; GO:0009506,plasmodesma; GO:0003846,2-acylglycerol O-acyltransferase activity; GO:0090430,caffeoyl-CoA: alcohol caffeoyl transferase activity; GO:0016787,hydrolase activity; GO:0004622,lysophospholipase activity; GO:0009809,lignin biosynthetic process; GO:0006629,lipid metabolic process; GO:0046686,response t…	Serine aminopeptidase, S33
gene-LOC110706846	5.48	1.45	7.81	0.36	1.26	0.66	196	51	275	12	44	23	0.137	-2.868	1.6102e-06	6.52079e-05	down	NW_018744991.1	876992	879277	-	LOC110706846	--	K23810 (E)-8-carboxylinalool synthase [EC:1.14.14.-] | (RefSeq) geraniol 8-hydroxylase (A)	cytochrome P450 76AD1-like [Chenopodium quinoa]	RecName: Full=Geraniol 8-hydroxylase; EC=1.14.13.152; AltName: Full=Cytochrome P450 76B6; AltName: Full=Geraniol 10-hydroxylase; Short=CrG10H;	SubName: Full=Uncharacterized protein {ECO:0000313|EMBL:ALT04749.1};	Cytochrome P450 CYP2 subfamily	GO:0005789,endoplasmic reticulum membrane; GO:0016021,integral component of membrane; GO:0102811,geraniol 10-hydroxylase activity; GO:0020037,heme binding; GO:0005506,iron ion binding; GO:0016709,oxidoreductase activity, acting on paired donors, with incorporation or reduction of molecular oxygen, NAD(P)H as one donor, and incorporation of one atom of oxygen; GO:0016099,monoterpenoid biosynthetic…	Cytochrome P450
gene-LOC110706932	30.16	34.19	42.82	13.05	13.95	8.94	484	539	676	195	218	139	0.281	-1.831	1.52716e-14	2.12947e-12	down	NW_018744991.1	2278563	2280165	+	LOC110706932	--	--	--	--	--	--	--	--
gene-LOC110707003	180.21	206.06	89.72	71.88	55.94	78.86	2611	2933	1279	970	789	1107	0.347	-1.526	0.000965508	0.0175772	down	NW_018744991.1	3115652	3116376	+	LOC110707003	--	--	uncharacterized protein LOC110707003 [Chenopodium quinoa]	RecName: Full=Outer envelope membrane protein 7 {ECO:0000303|PubMed:11595795}; Short=AtOEP7 {ECO:0000303|PubMed:11595795};	SubName: Full=Uncharacterized protein {ECO:0000313|EMBL:KNA23849.1};	--	GO:0009707,chloroplast outer membrane; GO:0031359,integral component of chloroplast outer membrane	--
gene-LOC110707027	0.83	1.54	1.03	0.12	0.11	0.23	30	55	37	4	4	8	0.111	-3.174	1.33082e-06	5.48866e-05	down	NW_018744991.1	3395517	3401849	-	LOC110707027	--	--	--	--	--	--	--	--
gene-LOC110707034	0.63	0.52	0	0	0.02	0	26	21	0	0	1	0	0.018	-5.801	0.00279872	0.0408507	down	NW_018744991.1	3475085	3478466	+	LOC110707034	--	K07426 cytochrome P450 family 4 subfamily B polypeptide 1 [EC:1.14.14.1] | (RefSeq) cytochrome P450 CYP72A219-like (A)	cytochrome P450 CYP72A219-like [Chenopodium quinoa]	RecName: Full=Cytochrome P450 CYP72A219; EC=1.14.-.-; AltName: Full=Cytochrome P450 CYP72A129;	SubName: Full=Uncharacterized protein {ECO:0000313|EMBL:KNA06618.1};	Cytochrome P450 CYP4/CYP19/CYP26 subfamilies	GO:0016021,integral component of membrane; GO:0020037,heme binding; GO:0005506,iron ion binding; GO:0004497,monooxygenase activity; GO:0016705,oxidoreductase activity, acting on paired donors, with incorporation or reduction of molecular oxygen	Cytochrome P450
gene-LOC110707054	3.68	3.34	2.09	0.02	0.06	0	177	158	99	1	3	0	0.008	-7.049	8.04245e-16	1.36068e-13	down	NW_018744991.1	3664277	3667484	-	LOC110707054	--	K13457 disease resistance protein RPM1 | (RefSeq) disease resistance protein RPM1-like (A)	disease resistance protein RPM1-like [Chenopodium quinoa]	RecName: Full=Disease resistance protein RPM1; AltName: Full=Resistance to Pseudomonas syringae protein 3;	SubName: Full=Uncharacterized protein {ECO:0000313|EMBL:KNA13992.1};	Apoptotic ATPase	GO:0012505,endomembrane system; GO:0019897,extrinsic component of plasma membrane; GO:0005886,plasma membrane; GO:0043531,ADP binding; GO:0005524,ATP binding; GO:0000166,nucleotide binding; GO:0009626,plant-type hypersensitive response; GO:0007165,signal transduction	Leucine rich repeat
gene-LOC110707126	0.5	0.17	0.26	0	0	0	12	4	6	0	0	0	0.022	-5.521	0.000907102	0.0166815	down	NW_018744996.1	2283498	2284785	+	LOC110707126	--	--	uncharacterized protein LOC110707126 [Chenopodium quinoa]	--	--	--	--	--
gene-LOC110707132	23.34	27.21	9.51	0	0	0	728	834	292	0	0	0	0	-12.023	5.97595e-20	1.99912e-17	down	NW_018744996.1	3830395	3833329	-	LOC110707132	--	K15503 serine/threonine-protein phosphatase 6 regulatory ankyrin repeat subunit B | (RefSeq) protein ACCELERATED CELL DEATH 6 (A)	uncharacterized protein LOC110707132 [Chenopodium quinoa]	RecName: Full=Ankyrin repeat-containing protein NPR4 {ECO:0000305}; Short=OsNPR4 {ECO:0000303|PubMed:17309686};	SubName: Full=Uncharacterized protein {ECO:0000313|EMBL:KNA17010.1};	FOG: Ankyrin repeat	GO:0016021,integral component of membrane; GO:0005886,plasma membrane	Domain of unknown function
gene-LOC110707188	0.09	0.11	0.12	0	0.02	0	6	7	8	0	1	0	0.044	-4.492	0.00319276	0.0450645	down	NW_018744996.1	2830353	2833724	+	LOC110707188	--	K15078 structure-specific endonuclease subunit SLX1 [EC:3.6.1.-] | (RefSeq) putative disease resistance protein RGA1 (A)	disease resistance protein RGA2-like [Chenopodium quinoa]	RecName: Full=Putative disease resistance protein RGA4; AltName: Full=RGA4-blb;	SubName: Full=NBS-LRR type resistance protein {ECO:0000313|EMBL:ABJ99599.1};	Apoptotic ATPase	GO:0043531,ADP binding; GO:0005524,ATP binding; GO:0006952,defense response	NB-ARC domain
gene-LOC110707310	7.09	7.27	9.51	2.99	3.79	2.73	298	300	393	117	155	111	0.335	-1.577	2.14496e-14	2.96917e-12	down	NW_018744996.1	2484106	2487235	-	LOC110707310	--	K18134 protein O-GlcNAc transferase [EC:2.4.1.255] | (RefSeq) uncharacterized protein LOC107919046 (A)	uncharacterized protein LOC110707310 [Chenopodium quinoa]	--	SubName: Full=Uncharacterized protein {ECO:0000313|EMBL:KNA05084.1};	Uncharacterized conserved protein	GO:0016021,integral component of membrane; GO:0016757,transferase activity, transferring glycosyl groups	Protein of unknown function (DUF563)
gene-LOC110707323	1.25	1.32	0.62	0.15	0.05	0.39	53	55	26	6	2	16	0.153	-2.712	0.000755949	0.0143453	down	NW_018744996.1	2628063	2632365	+	LOC110707323	--	K13495 cis-zeatin O-glucosyltransferase [EC:2.4.1.215] | (RefSeq) zeatin O-xylosyltransferase-like (A)	zeatin O-xylosyltransferase-like [Chenopodium quinoa]	RecName: Full=Zeatin O-xylosyltransferase; EC=2.4.2.40; AltName: Full=Zeatin O-beta-D-xylosyltransferase;	RecName: Full=Glycosyltransferase {ECO:0000256|RuleBase:RU362057}; EC=2.4.1.- {ECO:0000256|RuleBase:RU362057};	UDP-glucuronosyl and UDP-glucosyl transferase	GO:0016758,transferase activity, transferring hexosyl groups; GO:0050404,zeatin O-beta-D-xylosyltransferase activity; GO:0009690,cytokinin metabolic process; GO:0006486,protein glycosylation	UDP-glucoronosyl and UDP-glucosyl transferase
gene-LOC110707335	90.57	32.64	31.84	2.43	4.3	3.46	1839	651	636	46	85	68	0.053	-4.225	5.60252e-17	1.12842e-14	down	NW_018744996.1	2815640	2816655	+	LOC110707335	--	K00059 3-oxoacyl-[acyl-carrier protein] reductase [EC:1.1.1.100] | (RefSeq) NADPH-dependent aldehyde reductase-like protein, chloroplastic (A)	NADPH-dependent aldehyde reductase-like protein, chloroplastic, partial [Chenopodium quinoa]	RecName: Full=NADPH-dependent aldehyde reductase-like protein, chloroplastic {ECO:0000250|UniProtKB:Q9SQR2}; EC=1.1.1.- {ECO:0000250|UniProtKB:Q9SQR2}; Flags: Precursor;	SubName: Full=Reductase {ECO:0000313|EMBL:PIN07800.1};	Reductases with broad range of substrate specificities	GO:0009507,chloroplast; GO:0016491,oxidoreductase activity	Enoyl-(Acyl carrier protein) reductase
gene-LOC110707344	1.93	2.08	2.92	0.68	0.36	0.41	49	52	73	16	9	10	0.178	-2.489	2.41642e-08	1.37292e-06	down	NW_018744996.1	2931457	2933006	-	LOC110707344	--	K19613 leucine-rich repeat protein SHOC2 | (RefSeq) putative disease resistance protein RGA3 (A)	probable disease resistance protein RPP1 [Chenopodium quinoa]	RecName: Full=Disease resistance protein TAO1 {ECO:0000305}; AltName: Full=Protein TARGET OF AVRB OPERATION 1 {ECO:0000303|PubMed:18424557};	SubName: Full=Uncharacterized protein {ECO:0000313|EMBL:KNA13354.1};	--	GO:0043531,ADP binding; GO:0005524,ATP binding; GO:0042742,defense response to bacterium; GO:0009816,defense response to bacterium, incompatible interaction; GO:0007165,signal transduction	Leucine Rich repeats (2 copies)
gene-LOC110707391	3.58	1.67	5.08	1.48	2.1	1.92	179	82	250	69	102	93	0.469	-1.091	0.00226938	0.0345969	down	NW_018744996.1	3810804	3813305	+	LOC110707391	--	K00764 amidophosphoribosyltransferase [EC:2.4.2.14] | (RefSeq) amidophosphoribosyltransferase, chloroplastic-like (A)	nuclear intron maturase 3, mitochondrial-like [Chenopodium quinoa]	RecName: Full=Nuclear intron maturase 3, mitochondrial {ECO:0000303|PubMed:19946041}; Short=AtnMat3 {ECO:0000303|PubMed:19946041}; EC=3.1.-.-; AltName: Full=Nuclear intron maturase 2 a {ECO:0000303|PubMed:12527773}; Short=AtnMat2a {ECO:0000303|PubMed:12527773}; Flags: Precursor;	SubName: Full=Uncharacterized protein {ECO:0000313|EMBL:KNA14637.1};	FOG: Reverse transcriptase	GO:0005739,mitochondrion; GO:0003677,DNA binding; GO:0004519,endonuclease activity; GO:0046872,metal ion binding; GO:0003964,RNA-directed DNA polymerase activity; GO:0000373,Group II intron splicing; GO:0006314,intron homing; GO:0090615,mitochondrial mRNA processing	Type II intron maturase
gene-LOC110707425	1.22	0.44	0.98	0	0	0	14	5	11	0	0	0	0.016	-5.937	0.000116242	0.00291117	down	NW_018745000.1	3601374	3602537	-	LOC110707425	--	--	--	--	--	--	--	--
gene-LOC110707476	0.33	1.02	0.24	0	0.1	0	7	21	5	0	2	0	0.046	-4.45	0.00345978	0.0480144	down	NW_018745000.1	1213386	1215089	-	LOC110707476	--	--	--	--	--	--	--	--
gene-LOC110707509	60.5	61.79	67.83	37.6	37.36	28.35	1793	1799	1978	1038	1078	814	0.452	-1.145	8.44116e-08	4.35997e-06	down	NW_018745000.1	4228463	4233229	+	LOC110707509	--	K15104 solute carrier family 25 (mitochondrial oxoglutarate transporter), member 11 | (RefSeq) mitochondrial dicarboxylate/tricarboxylate transporter DTC-like (A)	mitochondrial dicarboxylate/tricarboxylate transporter DTC-like [Chenopodium quinoa]	RecName: Full=Mitochondrial dicarboxylate/tricarboxylate transporter DTC; AltName: Full=Dicarboxylate/tricarboxylate carrier;	SubName: Full=Uncharacterized protein {ECO:0000313|EMBL:KNA14762.1};	Mitochondrial oxoglutarate/malate carrier proteins	GO:0005618,cell wall; GO:0009507,chloroplast; GO:0009941,chloroplast envelope; GO:0016021,integral component of membrane; GO:0005743,mitochondrial inner membrane; GO:0005739,mitochondrion; GO:0009506,plasmodesma; GO:0005774,vacuolar membrane; GO:0005310,dicarboxylic acid transmembrane transporter activity; GO:0015367,oxoglutarate:malate antiporter activity; GO:0015142,tricarboxylic acid transmemb…	Mitochondrial carrier protein
gene-LOC110707619	0.45	0.61	1.83	0	0	0	3	4	12	0	0	0	0.027	-5.207	0.0029806	0.0427515	down	NW_018745000.1	7409884	7410216	-	LOC110707619	--	K01184 polygalacturonase [EC:3.2.1.15] | (RefSeq) probable polygalacturonase At3g15720 (A)	uncharacterized protein LOC110707619 [Chenopodium quinoa]	RecName: Full=Uncharacterized mitochondrial protein AtMg00810; AltName: Full=ORF240b;	SubName: Full=Uncharacterized protein {ECO:0000313|EMBL:KYP64090.1};	FOG: Transposon-encoded proteins with TYA, reverse transcriptase, integrase domains in various combinations	GO:0005739,mitochondrion	Reverse transcriptase (RNA-dependent DNA polymerase)
gene-LOC110707620	0.74	0.31	1.56	0	0	0	12	5	25	0	0	0	0.012	-6.339	2.95653e-05	0.000893932	down	NW_018745000.1	7411604	7412487	-	LOC110707620	--	--	uncharacterized protein LOC110707620 [Chenopodium quinoa]	--	SubName: Full=Uncharacterized protein {ECO:0000313|EMBL:KHN41680.1}; Flags: Fragment;	FOG: Transposon-encoded proteins with TYA, reverse transcriptase, integrase domains in various combinations	--	gag-polypeptide of LTR copia-type
gene-LOC110707761	2.89	2.56	3.64	1.07	2.07	1.33	139	121	172	48	97	62	0.413	-1.274	1.20254e-05	0.000406547	down	NW_018745003.1	1158228	1168761	+	LOC110707761	--	K03434 N-acetylglucosaminylphosphatidylinositol deacetylase [EC:3.5.1.89] | (RefSeq) probable N-acetylglucosaminyl-phosphatidylinositol de-N-acetylase (A)	probable N-acetylglucosaminyl-phosphatidylinositol de-N-acetylase [Chenopodium quinoa]	--	SubName: Full=Uncharacterized protein {ECO:0000313|EMBL:KNA24846.1};	N-acetylglucosaminyl phosphatidylinositol de-N-acetylase	--	GlcNAc-PI de-N-acetylase
gene-LOC110707772	30.11	26.17	29.8	8.74	9.21	8.09	876	748	853	237	261	228	0.253	-1.984	1.53144e-21	5.94871e-19	down	NW_018745003.1	1268210	1272656	-	LOC110707772	--	K03100 signal peptidase I [EC:3.4.21.89] | (RefSeq) chloroplast processing peptidase-like (A)	chloroplast processing peptidase-like [Chenopodium quinoa]	RecName: Full=Chloroplast processing peptidase; EC=3.4.21.89; AltName: Full=Signal peptidase I-3; Flags: Precursor;	SubName: Full=Uncharacterized protein {ECO:0000313|EMBL:KNA19808.1};	Mitochondrial inner membrane protease, subunit IMP1	GO:0009507,chloroplast; GO:0009941,chloroplast envelope; GO:0009535,chloroplast thylakoid membrane; GO:0016021,integral component of membrane; GO:0009526,plastid envelope; GO:0055035,plastid thylakoid membrane; GO:0008233,peptidase activity; GO:0008236,serine-type peptidase activity; GO:0051604,protein maturation; GO:0010027,thylakoid membrane organization	Signal peptidase, peptidase S26
gene-LOC110707823	84.86	99.4	66.14	13.76	13.59	15.21	3702	4260	2839	559	577	643	0.138	-2.857	4.84525e-17	9.91634e-15	down	NW_018745003.1	1959889	1966286	+	LOC110707823	--	K03593 ATP-binding protein involved in chromosome partitioning | (RefSeq) hypothetical protein (A)	fe-S cluster assembly factor HCF101, chloroplastic-like [Chenopodium quinoa]	RecName: Full=Fe-S cluster assembly factor HCF101, chloroplastic; AltName: Full=Protein HIGH CHLOROPHYLL FLUORESCENCE 101; Flags: Precursor;	SubName: Full=Uncharacterized protein {ECO:0000313|EMBL:KNA16850.1};	Predicted ATPase, nucleotide-binding	GO:0009507,chloroplast; GO:0009570,chloroplast stroma; GO:0005524,ATP binding; GO:0051536,iron-sulfur cluster binding; GO:0046872,metal ion binding; GO:0016226,iron-sulfur cluster assembly	NUBPL iron-transfer P-loop NTPase
gene-LOC110707849	10.02	10.2	13.97	4.66	5.45	4.6	342	342	469	148	181	152	0.364	-1.457	8.21935e-15	1.18968e-12	down	NW_018745003.1	2174894	2179341	-	LOC110707849	--	--	protein PGR-like [Chenopodium quinoa]	RecName: Full=Protein PGR {ECO:0000303|Ref.6}; Short=AtPGR {ECO:0000303|Ref.6}; AltName: Full=Plasma membrane glucose-responsive regulator {ECO:0000303|Ref.6}; AltName: Full=Transmembrane protein 19-like protein {ECO:0000305}; AltName: Full=VTE6-related protein {ECO:0000303|PubMed:26452599}; Short=VTE6R {ECO:0000303|PubMed:26452599};	SubName: Full=Uncharacterized protein {ECO:0000313|EMBL:KNA10571.1};	Predicted membrane protein	GO:0016021,integral component of membrane; GO:0016020,membrane; GO:0005886,plasma membrane	Integral membrane protein DUF92
gene-LOC110707868	28.86	32.74	27.29	11.2	8.12	17.93	993	1107	924	359	272	598	0.352	-1.507	0.000276914	0.00611799	down	NW_018745003.1	2467563	2471410	+	LOC110707868	--	--	uncharacterized protein LOC110707868 isoform X1 [Chenopodium quinoa]	RecName: Full=Heme-binding-like protein At3g10130, chloroplastic; Flags: Precursor;	SubName: Full=Uncharacterized protein {ECO:0000313|EMBL:ESR64256.1};	--	GO:0009507,chloroplast; GO:0009535,chloroplast thylakoid membrane; GO:0010287,plastoglobule	SOUL heme-binding protein
gene-LOC110707878	6.32	3.24	6.18	1.81	2.16	1.11	135	68	130	36	45	23	0.274	-1.869	4.98987e-07	2.21645e-05	down	NW_018745003.1	2568140	2571765	+	LOC110707878	--	K07936 GTP-binding nuclear protein Ran | (RefSeq) GTP-binding nuclear protein Ran-3-like (A)	GTP-binding nuclear protein Ran-3-like [Chenopodium quinoa]	RecName: Full=GTP-binding nuclear protein Ran-3; AltName: Full=Ras-related nuclear protein 3;	RecName: Full=GTP-binding nuclear protein {ECO:0000256|RuleBase:RU363057};	GTPase Ran/TC4/GSP1 (nuclear protein transport pathway), small G protein superfamily	GO:0005794,Golgi apparatus; GO:0005634,nucleus; GO:0009506,plasmodesma; GO:0005525,GTP binding; GO:0003924,GTPase activity; GO:0006606,protein import into nucleus; GO:0000054,ribosomal subunit export from nucleus	Ras family
gene-LOC110707898	0.62	0.25	0.68	0.04	0.13	0.04	15	6	16	1	3	1	0.119	-3.069	0.00171765	0.0279211	down	NW_018745003.1	2939005	2940624	-	LOC110707898	--	--	uncharacterized protein LOC110707894 [Chenopodium quinoa]	--	SubName: Full=Uncharacterized protein {ECO:0000313|EMBL:KNA14937.1};	--	--	--
gene-LOC110707899	14.57	12.83	21.7	0.11	0.13	0.24	445	385	652	3	4	7	0.008	-6.898	3.91305e-53	2.12797e-49	down	NW_018745003.1	2943799	2950345	-	LOC110707899	--	K00326 cytochrome-b5 reductase [EC:1.6.2.2] | (RefSeq) NADH-cytochrome b5 reductase-like protein (A)	NADH-cytochrome b5 reductase-like protein [Chenopodium quinoa]	RecName: Full=NADH-cytochrome b5 reductase-like protein; Short=B5R; EC=1.6.2.2;	RecName: Full=NADH-cytochrome b5 reductase {ECO:0000256|RuleBase:RU361226}; EC=1.6.2.2 {ECO:0000256|RuleBase:RU361226};	NADH-cytochrome b-5 reductase	GO:0005794,Golgi apparatus; GO:0005758,mitochondrial intermembrane space; GO:0005739,mitochondrion; GO:0009505,plant-type cell wall; GO:0005507,copper ion binding; GO:0004128,cytochrome-b5 reductase activity, acting on NAD(P)H; GO:0009651,response to salt stress	Oxidoreductase NAD-binding domain
gene-LOC110707900	13.9	11.31	16.72	0	0	0.02	588	470	696	0	0	1	0.001	-10.859	1.2775e-19	4.13313e-17	down	NW_018745003.1	2951693	2957032	-	LOC110707900	--	K03426 NAD+ diphosphatase [EC:3.6.1.22] | (RefSeq) nudix hydrolase 19, chloroplastic (A)	uncharacterized protein LOC110707900 [Chenopodium quinoa]	RecName: Full=Nudix hydrolase 19, chloroplastic; Short=AtNUDT19; EC=3.6.1.22; AltName: Full=NADH pyrophosphatase NUDT19; Flags: Precursor;	SubName: Full=uncharacterized protein LOC104595349 {ECO:0000313|RefSeq:XP_010254353.1};	--	GO:0009507,chloroplast; GO:0005829,cytosol; GO:0046872,metal ion binding; GO:0000210,NAD+ diphosphatase activity	Asp/Glu/Hydantoin racemase
gene-LOC110707924	2.99	3.34	3.59	1.01	2.02	1.4	73	80	86	23	48	33	0.37	-1.433	7.65624e-05	0.00202818	down	NW_018745003.1	3274072	3275700	-	LOC110707924	--	--	uncharacterized protein LOC110707924 [Chenopodium quinoa]	--	SubName: Full=Uncharacterized protein {ECO:0000313|EMBL:KNA14937.1};	--	--	--
gene-LOC110708056	4.98	8.19	4.28	2.38	2.83	2.68	518	837	438	231	287	270	0.36	-1.474	0.0003181	0.00694636	down	NW_018745003.1	4932952	4941534	+	LOC110708056	--	--	uncharacterized protein LOC110708056 [Chenopodium quinoa]	--	SubName: Full=Uncharacterized protein {ECO:0000313|EMBL:KNA24774.1};	--	GO:0016021,integral component of membrane	Tweety
gene-LOC110708060	1.68	1.8	1.8	0.62	1.13	1.01	55	58	58	19	36	32	0.434	-1.205	0.0021301	0.0329218	down	NW_018745003.1	4988436	4992246	+	LOC110708060	--	K00131 glyceraldehyde-3-phosphate dehydrogenase (NADP+) [EC:1.2.1.9] | (RefSeq) NADP-dependent glyceraldehyde-3-phosphate dehydrogenase-like (A)	calcium uptake protein, mitochondrial-like [Chenopodium quinoa]	RecName: Full=Calcium uptake protein, mitochondrial {ECO:0000250|UniProtKB:Q9BPX6}; AltName: Full=Mitochondrial calcium uniporter {ECO:0000303|PubMed:26530087}; Flags: Precursor;	SubName: Full=Ca2+ binding protein, contains EF-hand motif {ECO:0000313|EMBL:PIN20320.1};	Ca2+ binding protein, contains EF-hand motifs	GO:0005743,mitochondrial inner membrane; GO:0005758,mitochondrial intermembrane space; GO:0005739,mitochondrion; GO:0005509,calcium ion binding; GO:0006816,calcium ion transport; GO:0051562,negative regulation of mitochondrial calcium ion concentration	EF hand
gene-LOC110708130	0.46	0.31	0.43	0	0	0	12	8	11	0	0	0	0.016	-6.008	4.83235e-05	0.00137689	down	NW_018745003.1	2941809	2943408	-	LOC110708130	--	--	--	--	--	--	--	--
gene-LOC110708198	2.33	2.45	2.57	1.58	1.17	1.35	57	59	62	36	28	32	0.469	-1.094	0.00281609	0.0410099	down	NW_018745013.1	701587	716174	-	LOC110708198	--	--	--	--	--	--	--	--
gene-LOC110708218	0.81	0.48	0.63	0	0.15	0	57	33	44	0	10	0	0.06	-4.065	0.000113563	0.00286481	down	NW_018742418.1	491943	509674	-	LOC110708218	--	K17500 integrin-linked kinase-associated serine/threonine phosphatase 2C [EC:3.1.3.16] | (RefSeq) WAT1-related protein At3g18200 isoform X1 (A)	WAT1-related protein At3g28050-like [Chenopodium quinoa]	RecName: Full=WAT1-related protein At3g28050;	SubName: Full=Uncharacterized protein {ECO:0000313|EMBL:KNA24453.1};	--	GO:0016021,integral component of membrane; GO:0005886,plasma membrane; GO:0022857,transmembrane transporter activity	EamA-like transporter family
gene-LOC110708248	1.85	7.9	0.97	0.41	0.6	0.18	83	348	43	17	26	8	0.08	-3.647	1.65949e-05	0.000537634	down	NW_018745024.1	843830	846170	-	LOC110708248	--	K07418 cytochrome P450 family 2 subfamily J [EC:1.14.14.1] | (RefSeq) cytochrome P450 71A8-like (A)	cytochrome P450 71A1-like [Chenopodium quinoa]	RecName: Full=Cytochrome P450 71A4; EC=1.14.-.-; AltName: Full=CYPLXXIA4; AltName: Full=Cytochrome P-450EG2;	SubName: Full=Uncharacterized protein {ECO:0000313|EMBL:OAY30793.1};	Cytochrome P450 CYP2 subfamily	GO:0016021,integral component of membrane; GO:0020037,heme binding; GO:0005506,iron ion binding; GO:0004497,monooxygenase activity; GO:0016705,oxidoreductase activity, acting on paired donors, with incorporation or reduction of molecular oxygen	Cytochrome P450
gene-LOC110708272	2.33	1.51	3.96	0.32	0.22	0.39	55	35	92	7	5	9	0.106	-3.24	7.08804e-10	5.14925e-08	down	NW_018745024.1	1989226	1993812	+	LOC110708272	--	--	--	--	--	--	--	--
gene-LOC110708300	17.85	14.17	17.84	1.15	2.28	1.85	418	326	411	25	52	42	0.089	-3.498	2.13345e-31	2.13721e-28	down	NW_018745024.1	2772299	2778368	+	LOC110708300	--	K01859 chalcone isomerase [EC:5.5.1.6] | (RefSeq) hypothetical protein (A)	fatty-acid-binding protein 1-like [Chenopodium quinoa]	RecName: Full=Fatty-acid-binding protein 1; Short=AtFAP1; AltName: Full=Chalcone-flavanone isomerase family protein 1;	SubName: Full=Uncharacterized protein {ECO:0000313|EMBL:KNA23529.1};	--	GO:0009507,chloroplast; GO:0009941,chloroplast envelope; GO:0009570,chloroplast stroma; GO:0005739,mitochondrion; GO:0009536,plastid; GO:0005504,fatty acid binding; GO:0016872,intramolecular lyase activity; GO:0006631,fatty acid metabolic process	Chalcone isomerase like
gene-LOC110708347	1.73	1.94	4.2	1.5	1.44	1.14	52	57	124	42	42	33	0.455	-1.137	0.00257751	0.0384325	down	NW_018742418.1	950251	953836	+	LOC110708347	--	K03549 KUP system potassium uptake protein | (RefSeq) potassium transporter 8-like isoform X1 (A)	uncharacterized protein LOC110708347 isoform X1 [Chenopodium quinoa]	RecName: Full=Protein SUPPRESSOR OF QUENCHING 1, chloroplastic {ECO:0000303|PubMed:23818601}; EC=3.1.3.- {ECO:0000250|UniProtKB:P95649}; Flags: Precursor;	SubName: Full=Uncharacterized protein {ECO:0000313|EMBL:KNA18278.1};	--	GO:0009507,chloroplast; GO:0009570,chloroplast stroma; GO:0009534,chloroplast thylakoid; GO:0009535,chloroplast thylakoid membrane; GO:0016021,integral component of membrane; GO:0042651,thylakoid membrane; GO:0016787,hydrolase activity; GO:0046872,metal ion binding; GO:0045454,cell redox homeostasis; GO:0008152,metabolic process; GO:0010196,nonphotochemical quenching	NHL repeat
gene-LOC110708391	1.33	0.85	1.19	0	0	0	43	27	38	0	0	0	0.004	-7.808	1.36019e-09	9.4056e-08	down	NW_018742418.1	1060349	1064043	+	LOC110708391	--	K03283 heat shock 70kDa protein 1/2/6/8 | (RefSeq) heat shock 70 kDa protein 3-like (A)	ABC transporter G family member 41-like [Chenopodium quinoa]	RecName: Full=ABC transporter G family member 41 {ECO:0000303|PubMed:18299247}; Short=OsABCG41 {ECO:0000303|PubMed:18299247}; AltName: Full=Pleiotropic drug resistance protein 2 {ECO:0000303|PubMed:12644668, ECO:0000303|PubMed:16506311}; Short=OsPDR2 {ECO:0000303|PubMed:16506311};	SubName: Full=Uncharacterized protein {ECO:0000313|EMBL:KNA08802.1};	Pleiotropic drug resistance proteins (PDR1-15), ABC superfamily	GO:0016021,integral component of membrane; GO:0005886,plasma membrane; GO:0005524,ATP binding; GO:0042626,ATPase activity, coupled to transmembrane movement of substances	ABC-2 type transporter
gene-LOC110708445	1.87	1.51	3.06	0.65	0.72	0.59	208	165	334	67	78	63	0.263	-1.926	1.08341e-14	1.54465e-12	down	NW_018745024.1	7342198	7352228	-	LOC110708445	--	--	--	--	--	--	--	--
gene-LOC110708482	1.61	2.28	0.96	0.34	0.18	0.07	46	64	27	9	5	2	0.096	-3.388	4.86536e-06	0.000178332	down	NW_018745024.1	8195488	8200606	+	LOC110708482	--	K01738 cysteine synthase [EC:2.5.1.47] | (RefSeq) cysteine synthase-like isoform X1 (A)	cysteine synthase-like isoform X1 [Chenopodium quinoa]	RecName: Full=Cysteine synthase {ECO:0000303|PubMed:8280125}; Short=CSase; EC=2.5.1.47 {ECO:0000269|PubMed:8280125, ECO:0000269|PubMed:9013806}; AltName: Full=Beta-PA/CSase; EC=2.5.1.51 {ECO:0000269|PubMed:8280125, ECO:0000269|PubMed:9013806}; AltName: Full=Beta-pyrazolylalanine synthase {ECO:0000303|PubMed:8280125}; EC=4.2.1.50 {ECO:0000269|PubMed:8280125, ECO:0000269|PubMed:9013806}; AltName: F…	SubName: Full=Cysteine synthase like protein {ECO:0000313|EMBL:BAD08329.1};	Cystathionine beta-synthase and related enzymes	GO:0005737,cytoplasm; GO:0047458,beta-pyrazolylalanine synthase activity; GO:0004124,cysteine synthase activity; GO:0050461,L-mimosine synthase activity; GO:0050234,pyrazolylalanine synthase activity; GO:0006535,cysteine biosynthetic process from serine	Pyridoxal-phosphate dependent enzyme
gene-LOC110708488	2.77	3.03	2.27	0	0	0	82	88	66	0	0	0	0.002	-8.987	1.42326e-12	1.58883e-10	down	NW_018742204.1	6493015	6505787	+	LOC110708488	--	K00162 pyruvate dehydrogenase E1 component beta subunit [EC:1.2.4.1] | (RefSeq) pyruvate dehydrogenase E1 component subunit beta-3, chloroplastic-like (A)	pyruvate dehydrogenase E1 component subunit beta-3, chloroplastic-like [Chenopodium quinoa]	RecName: Full=Pyruvate dehydrogenase E1 component subunit beta-3, chloroplastic; EC=1.2.4.1; Flags: Precursor;	SubName: Full=Uncharacterized protein {ECO:0000313|EMBL:KNA12044.1};	Pyruvate dehydrogenase E1, beta subunit	GO:0009507,chloroplast; GO:0009941,chloroplast envelope; GO:0004739,pyruvate dehydrogenase (acetyl-transferring) activity; GO:0008270,zinc ion binding; GO:0006096,glycolytic process; GO:0048868,pollen tube development	Transketolase, pyrimidine binding domain
gene-LOC110708531	243.04	157.93	250.54	108.93	127.61	52.66	4206	2685	4266	1756	2150	883	0.371	-1.429	1.43844e-05	0.000475736	down	NW_018745024.1	8985184	8990263	+	LOC110708531	--	K04565 superoxide dismutase, Cu-Zn family [EC:1.15.1.1] | (RefSeq) superoxide dismutase [Cu-Zn]-like (A)	superoxide dismutase [Cu-Zn]	RecName: Full=Superoxide dismutase [Cu-Zn]; EC=1.15.1.1;	RecName: Full=Superoxide dismutase [Cu-Zn] {ECO:0000256|RuleBase:RU000393}; EC=1.15.1.1 {ECO:0000256|RuleBase:RU000393};	Cu2+/Zn2+ superoxide dismutase SOD1	GO:0005737,cytoplasm; GO:0046872,metal ion binding; GO:0004784,superoxide dismutase activity	Copper/zinc superoxide dismutase (SODC)
gene-LOC110708533	0.39	0.02	0.67	0.05	0.07	0.04	41	2	69	5	7	4	0.137	-2.873	0.00346144	0.04802	down	NW_018745024.1	9005596	9013411	+	LOC110708533	--	K20283 golgin subfamily A member 4 | (RefSeq) uncharacterized protein LOC18098881 (A)	cingulin-like isoform X1 [Chenopodium quinoa]	RecName: Full=FRIGIDA-like protein 4a;	SubName: Full=Uncharacterized protein {ECO:0000313|EMBL:KNA16734.1};	--	GO:0030154,cell differentiation; GO:0009908,flower development	Frigida-like protein
gene-LOC110708671	0.76	2.57	1.58	0.36	0.41	0.59	36	120	74	16	19	27	0.225	-2.153	0.000347114	0.00746108	down	NW_018745024.1	11076932	11080142	-	LOC110708671	--	K09490 heat shock 70kDa protein 5 | (RefSeq) mediator of RNA polymerase II transcription subunit 37a-like (A)	mediator of RNA polymerase II transcription subunit 37a-like [Chenopodium quinoa]	RecName: Full=Luminal-binding protein 4; Short=BiP 4; AltName: Full=78 kDa glucose-regulated protein homolog 4; Short=GRP-78-4; Flags: Precursor;	SubName: Full=Putative luminal binding protein 7B4 {ECO:0000313|EMBL:AFC88846.1}; Flags: Fragment;	Molecular chaperones GRP78/BiP/KAR2, HSP70 superfamily	GO:0005788,endoplasmic reticulum lumen; GO:0005524,ATP binding	Hsp70 protein
gene-LOC110708742	1.23	2.33	1.27	0.33	0.32	0.55	72	134	73	18	18	31	0.2	-2.32	1.68437e-05	0.000544304	down	NW_018745024.1	11882468	11893199	-	LOC110708742	--	K21989 calcium permeable stress-gated cation channel | (RefSeq) CSC1-like protein RXW8 (A)	calmodulin-binding protein 60 A-like [Chenopodium quinoa]	RecName: Full=Calmodulin-binding protein 60 D {ECO:0000303|PubMed:11782485};	SubName: Full=Uncharacterized protein {ECO:0000313|EMBL:KNA18488.1};	--	GO:0005634,nucleus; GO:0005516,calmodulin binding; GO:0003677,DNA binding; GO:0006355,regulation of transcription, DNA-templated; GO:0006950,response to stress; GO:0006351,transcription, DNA-templated	Calmodulin binding protein-like
gene-LOC110708744	0.39	0.72	0.38	0.04	0.1	0.15	24	43	23	2	6	9	0.156	-2.681	0.000289449	0.00637274	down	NW_018745024.1	11876965	11883685	-	LOC110708744	--	K21989 calcium permeable stress-gated cation channel | (RefSeq) CSC1-like protein RXW8 (A)	calmodulin-binding protein 60 C-like [Chenopodium quinoa]	RecName: Full=Calmodulin-binding protein 60 C {ECO:0000303|PubMed:11782485};	SubName: Full=Uncharacterized protein {ECO:0000313|EMBL:KNA18487.1};	--	GO:0005634,nucleus; GO:0005516,calmodulin binding; GO:0003677,DNA binding; GO:0006355,regulation of transcription, DNA-templated; GO:0006950,response to stress; GO:0006351,transcription, DNA-templated	Calmodulin binding protein-like
gene-LOC110708747	1.73	1.23	3.23	0.14	0.04	0.16	90	63	166	7	2	8	0.05	-4.335	1.3075e-14	1.83663e-12	down	NW_018745024.1	11917994	11926228	+	LOC110708747	--	K09122 uncharacterized protein | (RefSeq) unknown ribonuclease (A)	uncharacterized protein LOC110708747 isoform X1 [Chenopodium quinoa]	RecName: Full=Werner Syndrome-like exonuclease; EC=3.1.-.-;	SubName: Full=Uncharacterized protein {ECO:0000313|EMBL:KMT14285.1};	Predicted 3'-5' exonuclease	GO:0005634,nucleus; GO:0008408,3'-5' exonuclease activity; GO:0003677,DNA binding; GO:0046872,metal ion binding	3'-5' exonuclease
gene-LOC110708920	0.31	0.85	0.25	0.08	0.07	0.07	9	24	7	2	2	2	0.12	-3.058	0.00293628	0.0422911	down	NW_018745024.1	9720214	9721644	+	LOC110708920	--	K04728 serine-protein kinase ATM [EC:2.7.11.1] | (RefSeq) serine/threonine-protein kinase ATM-like (A)	uncharacterized protein LOC110708920 [Chenopodium quinoa]	RecName: Full=Putative ribonuclease H protein At1g65750; EC=3.1.26.4;	SubName: Full=Reverse transcriptase {ECO:0000313|EMBL:OMP05267.1};	FOG: Reverse transcriptase	GO:0046872,metal ion binding; GO:0003676,nucleic acid binding; GO:0004523,RNA-DNA hybrid ribonuclease activity	zinc-binding in reverse transcriptase
gene-LOC110708958	0.73	1.15	0.45	0	0	0	20	31	12	0	0	0	0.007	-7.134	8.37254e-07	3.56906e-05	down	NW_018745024.1	11852955	11854487	+	LOC110708958	--	--	uncharacterized protein LOC110708958 [Chenopodium quinoa]	--	SubName: Full=Uncharacterized protein {ECO:0000313|EMBL:OMO67845.1};	--	--	Plant mobile domain
gene-LOC110708993	2.2	8.19	1.12	0.25	0.42	0.9	38	139	19	4	7	15	0.103	-3.28	0.00034057	0.00735365	down	NW_018745024.1	8749280	8750861	-	LOC110708993	--	K10572 inositol-pentakisphosphate 2-kinase [EC:2.7.1.158] | (RefSeq) inositol-pentakisphosphate 2-kinase-like (A)	heavy metal-associated isoprenylated plant protein 39-like [Chenopodium quinoa]	RecName: Full=Heavy metal-associated isoprenylated plant protein 39 {ECO:0000303|PubMed:21072340, ECO:0000303|PubMed:23368984}; Short=AtHIP39 {ECO:0000303|PubMed:21072340, ECO:0000303|PubMed:23368984}; Flags: Precursor;	SubName: Full=Uncharacterized protein {ECO:0000313|EMBL:KNA19478.1};	Copper chaperone	GO:0005737,cytoplasm; GO:0046914,transition metal ion binding; GO:0046916,cellular transition metal ion homeostasis; GO:0030001,metal ion transport	Heavy-metal-associated domain
gene-LOC110709156	0.26	0.11	0.19	0	0	0	28	12	20	0	0	0	0.008	-6.955	5.25437e-07	2.33122e-05	down	NW_018745054.1	377067	382718	-	LOC110709156	--	K10401 kinesin family member 18/19 | (RefSeq) uncharacterized protein LOC113463215 (A)	uncharacterized protein LOC110709156 isoform X1 [Chenopodium quinoa]	--	SubName: Full=uncharacterized protein LOC104230577 {ECO:0000313|RefSeq:XP_009781721.1};	FOG: Reverse transcriptase	--	Domain of unknown function (DUF4283)
gene-LOC110709176	0.21	0.57	0.09	0.01	0	0	19	50	8	1	0	0	0.011	-6.526	1.97803e-05	0.000630632	down	NW_018745054.1	2475271	2499969	-	LOC110709176	--	K08835 serine/threonine-protein kinase OSR1/STK39 [EC:2.7.11.1] | (RefSeq) serine/threonine-protein kinase OSR1-like (A)	serine/threonine-protein kinase OSR1-like [Chenopodium quinoa]	RecName: Full=Serine/threonine-protein kinase BLUS1; EC=2.7.11.1; AltName: Full=Protein BLUE LIGHT SIGNALING 1;	SubName: Full=Pkinase domain-containing protein {ECO:0000313|EMBL:GAV78078.1};	Ste20-like serine/threonine protein kinase	GO:0005829,cytosol; GO:0005524,ATP binding; GO:0046872,metal ion binding; GO:0004674,protein serine/threonine kinase activity; GO:0032147,activation of protein kinase activity; GO:0007346,regulation of mitotic cell cycle; GO:1902456,regulation of stomatal opening; GO:0023014,signal transduction by protein phosphorylation; GO:0031098,stress-activated protein kinase signaling cascade	Protein kinase domain
gene-LOC110709179	0.65	0.26	0.69	0	0	0	23	9	24	0	0	0	0.009	-6.817	1.1392e-06	4.7694e-05	down	NW_018745054.1	2641932	2645083	+	LOC110709179	--	--	--	--	--	--	--	--
gene-LOC110709188	0.49	0.15	0.75	0	0	0	10	3	15	0	0	0	0.018	-5.771	0.000370054	0.00786974	down	NW_018745054.1	3540394	3541552	+	LOC110709188	--	--	uncharacterized protein LOC110709188 [Chenopodium quinoa]	--	SubName: Full=Uncharacterized protein {ECO:0000313|EMBL:EMJ01277.1}; Flags: Fragment;	--	--	--
gene-LOC110709190	0.81	0.96	1.51	0	0	0	6	7	11	0	0	0	0.02	-5.616	0.000320594	0.00699372	down	NW_018745054.1	3543762	3544234	+	LOC110709190	--	--	--	--	--	--	--	--
gene-LOC110709191	1.02	0.33	1.25	0	0	0	19	6	23	0	0	0	0.011	-6.57	7.15804e-06	0.00025299	down	NW_018745054.1	3541647	3542761	+	LOC110709191	--	--	--	--	--	--	--	--
gene-LOC110709296	3.26	2.85	4.35	0	0	0	174	149	228	0	0	0	0.001	-10.145	4.7705e-17	9.81615e-15	down	NW_018742204.1	7298945	7306968	-	LOC110709296	--	--	--	--	--	--	--	--
gene-LOC110709414	3.92	2.52	4.26	1.79	1.71	1	73	46	78	31	31	18	0.357	-1.487	6.73286e-05	0.00183333	down	NW_018745067.1	608566	609952	+	LOC110709414	--	--	--	--	--	--	--	--
gene-LOC110709442	0.25	0.18	0.23	0	0	0	13	9	12	0	0	0	0.014	-6.143	2.38863e-05	0.000739251	down	NW_018742204.1	7454912	7459604	-	LOC110709442	--	K15255 ATP-dependent DNA helicase PIF1 [EC:3.6.4.12] | (RefSeq) uncharacterized protein LOC108838684 (A)	uncharacterized protein LOC110709442 [Chenopodium quinoa]	--	SubName: Full=Uncharacterized protein {ECO:0000313|EnsemblPlants:TRIAE_CS42_2DL_TGACv1_158210_AA0512500.1};	DNA helicase PIF1/RRM3	--	Helitron helicase-like domain at N-terminus
gene-LOC110709457	1.36	1	1.81	0.45	0.41	0.33	202	146	264	62	59	47	0.244	-2.036	2.32353e-15	3.65495e-13	down	NW_018745068.1	795604	804076	+	LOC110709457	--	--	--	--	--	--	--	--
gene-LOC110709475	1.4	0.31	0.37	0	0	0	23	5	6	0	0	0	0.014	-6.171	0.000191892	0.00445954	down	NW_018745068.1	86692	88337	-	LOC110709475	--	--	protein gar2-like [Chenopodium quinoa]	--	SubName: Full=Uncharacterized protein {ECO:0000313|EMBL:KMS94659.1}; Flags: Fragment;	--	--	--
gene-LOC110709619	10.25	8	5.25	5.13	3.01	2.39	266	204	134	124	76	60	0.363	-1.462	0.0020904	0.0325111	down	NW_018745080.1	5029	9714	-	LOC110709619	--	--	--	--	--	--	--	--
gene-LOC110709626	6.03	8.9	4.78	3.57	2.78	2.66	136	197	106	75	61	58	0.366	-1.448	0.00111373	0.0195917	down	NW_018745080.1	157481	158837	-	LOC110709626	--	K14504 xyloglucan:xyloglucosyl transferase TCH4 [EC:2.4.1.207] | (RefSeq) probable xyloglucan endotransglucosylase/hydrolase protein 23 (A)	probable xyloglucan endotransglucosylase/hydrolase protein 23 [Chenopodium quinoa]	RecName: Full=Probable xyloglucan endotransglucosylase/hydrolase protein 23; Short=At-XTH23; Short=XTH-23; EC=2.4.1.207; Flags: Precursor;	RecName: Full=Xyloglucan endotransglucosylase/hydrolase {ECO:0000256|RuleBase:RU361120}; EC=2.4.1.207 {ECO:0000256|RuleBase:RU361120};	--	GO:0048046,apoplast; GO:0005618,cell wall; GO:0005794,Golgi apparatus; GO:0004553,hydrolase activity, hydrolyzing O-glycosyl compounds; GO:0016762,xyloglucan:xyloglucosyl transferase activity; GO:0042546,cell wall biogenesis; GO:0071555,cell wall organization; GO:0010411,xyloglucan metabolic process	Glycosyl hydrolases family 16
gene-LOC110709695	4.18	9.03	3.31	1.37	1.62	0.63	82	174	64	25	31	12	0.168	-2.573	2.72799e-05	0.000834108	down	NW_018745080.1	1171784	1172765	-	LOC110709695	--	--	uncharacterized protein LOC110709695 [Chenopodium quinoa]	--	SubName: Full=Uncharacterized protein {ECO:0000313|EMBL:KNA12195.1};	--	--	--
gene-LOC110709719	3.76	3.25	2.31	1.44	0.7	1.02	210	178	127	75	38	55	0.279	-1.841	5.81271e-05	0.00162104	down	NW_018745080.1	1741462	1744255	-	LOC110709719	--	K13435 serine/threonine-protein kinase Pto | (RefSeq) Pto; serine/threonine protein kinase Pto (A)	LOW QUALITY PROTEIN: probable receptor-like protein kinase At2g23200 [Chenopodium quinoa]	RecName: Full=Probable receptor-like protein kinase At2g23200; EC=2.7.11.-; Flags: Precursor;	SubName: Full=Uncharacterized protein {ECO:0000313|EMBL:KNA20920.1};	Serine/threonine protein kinase	GO:0016021,integral component of membrane; GO:0005524,ATP binding; GO:0004674,protein serine/threonine kinase activity	Protein tyrosine kinase
gene-LOC110709728	7.68	5.76	7.8	4.01	5.13	3.34	152	112	152	74	99	64	0.493	-1.021	9.11469e-05	0.00237163	down	NW_018745080.1	1902508	1904971	-	LOC110709728	--	K09510 DnaJ homolog subfamily B member 4 | (RefSeq) DNJ7; DnaJ-like protein (A)	uncharacterized protein LOC110709728 [Chenopodium quinoa]	RecName: Full=DnaJ protein ERDJ3B; AltName: Full=Chaperone protein dnaJ 19; Short=AtDjB19; Short=AtJ19; AltName: Full=Endoplasmic reticulum dnaJ domain-containing protein 3B; Short=AtERdj3B; AltName: Full=Protein SCJ1 homolog ERDJ3B; Flags: Precursor;	SubName: Full=Uncharacterized protein {ECO:0000313|EMBL:ESR47095.1};	Molecular chaperone (DnaJ superfamily)	GO:0005783,endoplasmic reticulum; GO:0005788,endoplasmic reticulum lumen; GO:0005886,plasma membrane; GO:0051082,unfolded protein binding; GO:0052033,pathogen-associated molecular pattern dependent induction by symbiont of host innate immune response; GO:0006457,protein folding	DnaJ domain
gene-LOC110709738	13.62	3.54	19.17	1.51	2.19	1.2	447	114	619	46	70	38	0.12	-3.059	1.36973e-09	9.44592e-08	down	NW_018745080.1	2035197	2036838	-	LOC110709738	--	--	--	--	--	--	--	--
gene-LOC110709765	35.08	41.17	66.1	4.16	7.61	5.47	1060	1222	1965	117	224	160	0.103	-3.275	1.70735e-32	1.85697e-29	down	NW_018745080.1	843454	844965	+	LOC110709765	--	K00020 3-hydroxyisobutyrate dehydrogenase [EC:1.1.1.31] | (RefSeq) 6-phosphogluconate dehydrogenase-like protein (A)	protein EXORDIUM-like 1 [Chenopodium quinoa]	RecName: Full=Protein EXORDIUM; Flags: Precursor;	SubName: Full=Uncharacterized protein {ECO:0000313|EMBL:KNA15762.1};	--	GO:0048046,apoplast; GO:0005618,cell wall; GO:0005615,extracellular space; GO:0005794,Golgi apparatus; GO:0009505,plant-type cell wall; GO:0009741,response to brassinosteroid	Phosphate-induced protein 1 conserved region
gene-LOC110709801	2.99	2.19	3.8	0.53	0.67	0.8	128	92	160	21	28	33	0.191	-2.386	7.94379e-14	1.01136e-11	down	NW_018745080.1	2771892	2775414	-	LOC110709801	--	--	uncharacterized protein LOC110709801 [Chenopodium quinoa]	--	SubName: Full=Uncharacterized protein {ECO:0000313|EMBL:KNA15276.1};	--	--	M-phase-specific PLK1-interacting protein
gene-LOC110709889	2.19	1.51	0.47	0	0	0	43	29	9	0	0	0	0.006	-7.493	4.91107e-07	2.18399e-05	down	NW_018745082.1	637923	639190	+	LOC110709889	--	K17609 nucleoredoxin [EC:1.8.1.8] | (RefSeq) probable nucleoredoxin 2 (A)	basic proline-rich protein-like [Chenopodium quinoa]	RecName: Full=Retrovirus-related Pol polyprotein from transposon RE2; AltName: Full=Retro element 2 {ECO:0000303|PubMed:10689195}; Short=AtRE2 {ECO:0000303|PubMed:10689195}; Includes: RecName: Full=Protease RE2; EC=3.4.23.-; Includes: RecName: Full=Reverse transcriptase RE2; EC=2.7.7.49; Includes: RecName: Full=Endonuclease RE2;	SubName: Full=Uncharacterized protein {ECO:0000313|EMBL:CAN69804.1};	FOG: Transposon-encoded proteins with TYA, reverse transcriptase, integrase domains in various combinations	GO:0004190,aspartic-type endopeptidase activity; GO:0004519,endonuclease activity; GO:0046872,metal ion binding; GO:0003676,nucleic acid binding; GO:0003964,RNA-directed DNA polymerase activity; GO:0015074,DNA integration; GO:0006310,DNA recombination	--
gene-LOC110710086	1.37	0.41	1.56	0	0	0	17	5	19	0	0	0	0.012	-6.347	2.31756e-05	0.00071901	down	NW_018745120.1	744663	747455	+	LOC110710086	--	--	--	--	--	--	--	--
gene-LOC110710356	2.29	1.28	3.18	0.44	0	0.03	73	40	100	13	0	1	0.062	-4.005	5.60664e-05	0.00157164	down	NW_018745170.1	121409	127515	-	LOC110710356	--	--	--	--	--	--	--	--
gene-LOC110710383	0.26	0.94	0.27	0	0	0	4	14	4	0	0	0	0.02	-5.648	0.00134714	0.0228936	down	NW_018745170.1	1854186	1855363	-	LOC110710383	--	--	--	--	--	--	--	--
gene-LOC110710397	8.34	14.95	3.46	2.19	0.84	2.62	184	324	75	45	18	56	0.167	-2.586	0.000253778	0.00567934	down	NW_018745170.1	88809	90169	-	LOC110710397	--	K13424 WRKY transcription factor 33 | (RefSeq) WRKY5; probable WRKY transcription factor 33 (A)	probable WRKY transcription factor 50 isoform X1 [Chenopodium quinoa]	RecName: Full=Probable WRKY transcription factor 50; AltName: Full=WRKY DNA-binding protein 50;	SubName: Full=Uncharacterized protein {ECO:0000313|EMBL:KNA14459.1};	--	GO:0005634,nucleus; GO:0003700,DNA-binding transcription factor activity; GO:0043565,sequence-specific DNA binding; GO:0050832,defense response to fungus; GO:0009867,jasmonic acid mediated signaling pathway; GO:0006351,transcription, DNA-templated	WRKY DNA -binding domain
gene-LOC110710508	117.99	212.16	80.42	69.41	39.86	42.3	1785	3153	1197	978	587	620	0.291	-1.781	0.000537319	0.010828	down	NW_018745174.1	2107677	2109283	-	LOC110710508	--	K03860 phosphatidylinositol glycan, class Q | (RefSeq) N-acetylglucosaminyl-phosphatidylinositol biosynthetic protein gpi1-like (A)	protein GAST1-like [Chenopodium quinoa]	RecName: Full=Protein GAST1; Flags: Precursor;	SubName: Full=Uncharacterized protein {ECO:0000313|EMBL:KNA03687.1};	--	GO:0005576,extracellular region	Gibberellin regulated protein
gene-LOC110710603	52.77	53.07	51.69	23.13	26.72	33.59	1487	1469	1433	607	733	917	0.442	-1.179	3.69849e-05	0.001083	down	NW_018742418.1	4866152	4869353	-	LOC110710603	--	K01661 naphthoate synthase [EC:4.1.3.36] | (RefSeq) 1,4-dihydroxy-2-naphthoyl-CoA synthase, peroxisomal-like (A)	1,4-dihydroxy-2-naphthoyl-CoA synthase, peroxisomal-like [Chenopodium quinoa]	RecName: Full=1,4-dihydroxy-2-naphthoyl-CoA synthase, peroxisomal; Short=DHNS; EC=4.1.3.36; AltName: Full=Enoyl-CoA hydratase/isomerase D; Short=ECHID; AltName: Full=Naphthoate synthase;	SubName: Full=Uncharacterized protein {ECO:0000313|EMBL:KNA17594.1};	Enoyl-CoA hydratase	GO:0005777,peroxisome; GO:0008935,1,4-dihydroxy-2-naphthoyl-CoA synthase activity; GO:0016853,isomerase activity; GO:0009234,menaquinone biosynthetic process; GO:0042372,phylloquinone biosynthetic process	Enoyl-CoA hydratase/isomerase
gene-LOC110710688	0.51	0.6	1.04	0	0	0	7	8	14	0	0	0	0.017	-5.878	9.93719e-05	0.00255077	down	NW_018745177.1	3185981	3187039	-	LOC110710688	--	--	uncharacterized protein LOC110710688 [Chenopodium quinoa]	--	SubName: Full=Uncharacterized protein {ECO:0000313|EMBL:KNA03285.1}; Flags: Fragment;	--	--	--
gene-LOC110710744	10.71	9.78	10.76	6.83	6.59	5.28	429	385	424	255	257	205	0.499	-1.004	1.41778e-05	0.000470538	down	NW_018742204.1	8315253	8319044	-	LOC110710744	--	--	uncharacterized protein LOC110710744 isoform X1 [Chenopodium quinoa]	--	--	--	--	--
gene-LOC110710768	0.43	0.31	0.61	0	0	0.01	34	24	48	0	0	1	0.009	-6.785	1.11392e-07	5.60895e-06	down	NW_018745177.1	1406853	1411585	+	LOC110710768	--	K02218 casein kinase 1 [EC:2.7.11.1] | (RefSeq) uncharacterized protein LOC8069780 (A)	protein ALP1-like isoform X1 [Chenopodium quinoa]	RecName: Full=Protein ALP1-like {ECO:0000305}; EC=3.1.-.-;	SubName: Full=Uncharacterized protein {ECO:0000313|EMBL:KNA23802.1};	Predicted transposase	GO:0005634,nucleus; GO:0046872,metal ion binding; GO:0004518,nuclease activity	DDE superfamily endonuclease
gene-LOC110710779	1.16	0.38	2.98	0.12	0.39	0	31	10	78	3	10	0	0.1	-3.327	0.000949311	0.0173321	down	NW_018745177.1	3180041	3184197	-	LOC110710779	--	--	uncharacterized protein LOC110710779 [Chenopodium quinoa]	--	SubName: Full=Uncharacterized protein {ECO:0000313|EMBL:KNA10039.1}; Flags: Fragment;	--	--	YpjP-like protein
gene-LOC110710783	0.25	0.06	0.51	0	0	0	13	3	26	0	0	0	0.013	-6.316	7.96283e-05	0.00209672	down	NW_018745177.1	2382743	2387501	+	LOC110710783	--	--	uncharacterized protein LOC110710783 [Chenopodium quinoa]	--	SubName: Full=Uncharacterized protein {ECO:0000313|EMBL:KNA07589.1};	--	--	--
gene-LOC110710788	0.53	0.16	0.49	0	0	0	20	6	18	0	0	0	0.011	-6.469	1.14687e-05	0.000390152	down	NW_018745177.1	1944396	1955899	+	LOC110710788	--	K00924 kinase [EC:2.7.1.-] | (RefSeq) receptor protein kinase CLAVATA1-like (A)	uncharacterized protein LOC110710788 [Chenopodium quinoa]	--	SubName: Full=Uncharacterized protein {ECO:0000313|EMBL:ACY01924.1};	--	GO:0004190,aspartic-type endopeptidase activity; GO:0003676,nucleic acid binding; GO:0008270,zinc ion binding	gag-polypeptide of LTR copia-type
gene-LOC110710854	3.26	4.74	5.52	0	0	0	101	144	168	0	0	0	0.001	-9.751	3.28145e-15	5.01667e-13	down	NW_018745177.1	689884	693674	-	LOC110710854	--	--	--	--	--	--	--	--
gene-LOC110710877	0.7	2.08	0.15	0.05	0.05	0.15	14	41	3	1	1	3	0.067	-3.905	0.00164211	0.0269209	down	NW_018742418.1	5254218	5256722	+	LOC110710877	--	K00588 caffeoyl-CoA O-methyltransferase [EC:2.1.1.104] | (RefSeq) flavonoid 3',5'-methyltransferase-like (A)	flavonoid 3',5'-methyltransferase-like [Chenopodium quinoa]	RecName: Full=Flavonoid 3',5'-methyltransferase; EC=2.1.1.267 {ECO:0000269|PubMed:19525322, ECO:0000269|PubMed:20580386}; AltName: Full=Anthocyanin-O-methyltransferase; Short=VvAOMT;	SubName: Full=Uncharacterized protein {ECO:0000313|EMBL:KNA05927.1};	O-methyltransferase	GO:0005737,cytoplasm; GO:0046872,metal ion binding; GO:0008171,O-methyltransferase activity; GO:0009718,anthocyanin-containing compound biosynthetic process; GO:0033485,cyanidin 3-O-glucoside biosynthetic process; GO:0033486,delphinidin 3-O-glucoside biosynthetic process; GO:0043473,pigmentation	O-methyltransferase
gene-LOC110711132	1.1	1.53	1.6	0.43	0.53	0.64	30	41	43	11	14	17	0.319	-1.649	0.000426937	0.00888099	down	NW_018745240.1	1974458	1980391	-	LOC110711132	--	--	--	--	--	--	--	--
gene-LOC110711216	5.86	4.05	6.72	0.69	3.66	0.54	156	106	176	17	95	14	0.237	-2.074	0.00137347	0.0232674	down	NW_018742418.1	5820523	5864341	-	LOC110711216	--	K09264 MADS-box transcription factor, plant | (RefSeq) MADS-box protein FLOWERING LOCUS C-like (A)	agamous-like MADS-box protein AGL27 [Chenopodium quinoa]	RecName: Full=MADS-box transcription factor 6; AltName: Full=OsMADS6; AltName: Full=Protein MOSAIC FLORAL ORGANS 1;	SubName: Full=Uncharacterized protein {ECO:0000313|EMBL:KNA15436.1};	MADS box transcription factor	GO:0005634,nucleus; GO:0003677,DNA binding; GO:0003700,DNA-binding transcription factor activity; GO:0046983,protein dimerization activity; GO:0000977,RNA polymerase II regulatory region sequence-specific DNA binding; GO:0030154,cell differentiation; GO:0009553,embryo sac development; GO:0010582,floral meristem determinacy; GO:0048437,floral organ development; GO:0048449,floral organ formation; G…	SRF-type transcription factor (DNA-binding and dimerisation domain)
gene-LOC110711416	1.52	2.76	1.26	0.54	0.24	0.24	33	59	27	11	5	5	0.146	-2.775	6.58842e-05	0.00179915	down	NW_018745272.1	34976	41373	-	LOC110711416	--	K09873 aquaporin TIP | (RefSeq) aquaporin TIP4-1-like (A)	aquaporin TIP4-1-like [Chenopodium quinoa]	RecName: Full=Aquaporin TIP4-1; AltName: Full=Epsilon-tonoplast intrinsic protein; Short=Epsilon-TIP; AltName: Full=Tonoplast intrinsic protein 4-1; Short=AtTIP4;1;	SubName: Full=Uncharacterized protein {ECO:0000313|EMBL:KNA17477.1};	Aquaporin (major intrinsic protein family)	GO:0042807,central vacuole; GO:0005887,integral component of plasma membrane; GO:0009705,plant-type vacuole membrane; GO:0015250,water channel activity; GO:0034220,ion transmembrane transport	Major intrinsic protein
gene-LOC110711562	1.15	1.09	1.3	0.73	0.53	0.52	139	129	154	82	62	61	0.424	-1.237	2.69686e-05	0.000825253	down	NW_018745281.1	1416187	1441041	+	LOC110711562	--	K15078 structure-specific endonuclease subunit SLX1 [EC:3.6.1.-] | (RefSeq) putative disease resistance protein RGA3 (A)	putative disease resistance protein RGA3 [Chenopodium quinoa]	RecName: Full=Putative disease resistance protein RGA3; AltName: Full=Blight resistance protein B149; AltName: Full=RGA1-blb;	SubName: Full=Uncharacterized protein {ECO:0000313|EMBL:KNA20539.1};	Apoptotic ATPase	GO:0043531,ADP binding; GO:0005524,ATP binding; GO:0006952,defense response	NB-ARC domain
gene-LOC110711636	9.58	3.45	12.44	3.86	3.83	3.43	144	51	184	54	56	50	0.387	-1.369	0.00102047	0.0183324	down	NW_018742418.1	6512140	6515384	-	LOC110711636	--	--	--	--	--	--	--	--
gene-LOC110711644	8.37	3.77	4.47	0.52	2.72	1.87	120	53	63	7	38	26	0.252	-1.99	0.00129332	0.0221371	down	NW_018745281.1	15869	20609	+	LOC110711644	--	--	--	--	--	--	--	--
gene-LOC110711796	3.23	2.38	3.9	1.49	1.49	1.98	116	84	138	50	52	69	0.45	-1.153	0.000136376	0.0033364	down	NW_018742418.1	6720504	6723663	+	LOC110711796	--	K16297 serine carboxypeptidase-like clade II [EC:3.4.16.-] | (RefSeq) serine carboxypeptidase-like 45 (A)	serine carboxypeptidase-like 45 [Chenopodium quinoa]	RecName: Full=Serine carboxypeptidase-like 45; EC=3.4.16.-; Flags: Precursor;	RecName: Full=Carboxypeptidase {ECO:0000256|RuleBase:RU361156}; EC=3.4.16.- {ECO:0000256|RuleBase:RU361156};	Serine carboxypeptidases (lysosomal cathepsin A)	GO:0005576,extracellular region; GO:0009505,plant-type cell wall; GO:0009506,plasmodesma; GO:0004185,serine-type carboxypeptidase activity; GO:0051603,proteolysis involved in cellular protein catabolic process	Serine carboxypeptidase
gene-LOC110711841	3.61	3.12	5.07	0	0	0	432	367	596	0	0	0	0	-11.479	1.09898e-21	4.3578e-19	down	NW_018745286.1	6333820	6350743	+	LOC110711841	--	--	uncharacterized protein LOC110711841 isoform X1 [Chenopodium quinoa]	--	--	--	--	--
gene-LOC110711919	0.33	0.48	1.15	0.04	0.19	0.08	9	13	31	1	5	2	0.135	-2.89	0.00103269	0.0184734	down	NW_018745286.1	1417369	1421200	-	LOC110711919	--	--	--	--	--	--	--	--
gene-LOC110711998	0.22	0.44	0.88	0.05	0.09	0.09	5	10	20	1	2	2	0.129	-2.955	0.00361215	0.0495509	down	NW_018745286.1	6200079	6203164	+	LOC110711998	--	--	--	--	--	--	--	--
gene-LOC110712039	1.58	0.59	1.57	0.13	0	0	38	14	37	3	0	0	0.031	-5.025	3.75537e-06	0.000141261	down	NW_018745286.1	2896884	2898083	-	LOC110712039	--	K06943 nucleolar GTP-binding protein | (RefSeq) uncharacterized protein LOC108835530 (A)	uncharacterized protein LOC110712039 [Chenopodium quinoa]	RecName: Full=Putative ribonuclease H protein At1g65750; EC=3.1.26.4;	SubName: Full=Uncharacterized protein {ECO:0000313|EMBL:CCA66040.1};	FOG: Reverse transcriptase	GO:0046872,metal ion binding; GO:0003676,nucleic acid binding; GO:0004523,RNA-DNA hybrid ribonuclease activity	zinc-binding in reverse transcriptase
gene-LOC110712149	32.82	31.12	33.29	11.96	12.74	15.15	1458	1358	1455	495	551	652	0.344	-1.541	5.10245e-10	3.83864e-08	down	NW_018745291.1	1353522	1362581	-	LOC110712149	--	K13071 pheophorbide a oxygenase [EC:1.14.15.17] | (RefSeq) pheophorbide a oxygenase, chloroplastic-like (A)	protein TIC 55, chloroplastic-like [Chenopodium quinoa]	RecName: Full=Protein TIC 55, chloroplastic; AltName: Full=Rieske iron-sulfur protein TIC55; AltName: Full=Translocon at the inner envelope membrane of chloroplasts 55; Short=PsTIC55; Flags: Precursor;	SubName: Full=Uncharacterized protein {ECO:0000313|EMBL:KNA12024.1};	--	GO:0009706,chloroplast inner membrane; GO:0016021,integral component of membrane; GO:0051537,2 iron, 2 sulfur cluster binding; GO:0010277,chlorophyllide a oxygenase [overall] activity; GO:0046872,metal ion binding; GO:0015031,protein transport	Rieske [2Fe-2S] domain
gene-LOC110712181	7.35	4.31	6.5	2.72	3.13	2.06	316	182	275	109	131	86	0.366	-1.449	2.46731e-07	1.16098e-05	down	NW_018745291.1	1325333	1329797	+	LOC110712181	--	K17569 G patch domain-containing protein 2 | (RefSeq) hypothetical protein (A)	zinc finger CCCH domain-containing protein 18-like [Chenopodium quinoa]	RecName: Full=Zinc finger CCCH domain-containing protein 18; Short=OsC3H18;	SubName: Full=Uncharacterized protein {ECO:0000313|EMBL:KMS99354.1};	Predicted RNA-processing protein, contains G-patch domain	GO:0003677,DNA binding; GO:0046872,metal ion binding	G-patch domain
gene-LOC110712192	1.84	1.56	2.76	1.07	1.29	0.96	101	84	149	55	69	51	0.463	-1.11	2.00747e-05	0.000638951	down	NW_018745291.1	709409	712276	-	LOC110712192	--	--	uncharacterized protein LOC110712192 isoform X1 [Chenopodium quinoa]	RecName: Full=Protein MARD1 {ECO:0000303|PubMed:15159630}; AltName: Full=Mediator of ABA-regulated dormancy1 {ECO:0000303|PubMed:15159630}; AltName: Full=Senescence-associated protein SAG102 {ECO:0000303|PubMed:11402199};	SubName: Full=Uncharacterized protein {ECO:0000313|EMBL:KNA09183.1};	--	GO:0010494,cytoplasmic stress granule; GO:0000932,P-body; GO:0046872,metal ion binding; GO:0009737,response to abscisic acid; GO:0010162,seed dormancy process	zinc-finger of the FCS-type, C2-C2
gene-LOC110712232	3.52	2.65	4.27	1.09	1.38	0.7	181	134	216	52	69	35	0.256	-1.965	8.58427e-12	8.29384e-10	down	NW_018745291.1	995388	1001726	-	LOC110712232	--	K16860 phospholipase D3/4 [EC:3.1.4.4] | (RefSeq) phospholipase D Z-like (A)	phospholipase D Z-like [Chenopodium quinoa]	--	SubName: Full=Uncharacterized protein {ECO:0000313|EMBL:KNA11054.1};	Predicted phospholipase D	GO:0003824,catalytic activity	PLD-like domain
gene-LOC110712315	1.15	3.86	0.12	0.12	0	0	10	33	1	1	0	0	0.018	-5.765	0.00128815	0.0220585	down	NW_018745311.1	2915126	2915875	+	LOC110712315	--	--	--	--	--	--	--	--
gene-LOC110712374	2.24	7.94	0.36	0.22	0.1	0.42	44	153	7	4	2	8	0.053	-4.236	0.000101147	0.00258936	down	NW_018745323.1	391304	393965	-	LOC110712374	--	K00588 caffeoyl-CoA O-methyltransferase [EC:2.1.1.104] | (RefSeq) flavonoid 3',5'-methyltransferase-like (A)	flavonoid 3',5'-methyltransferase-like [Chenopodium quinoa]	RecName: Full=Flavonoid 3',5'-methyltransferase; EC=2.1.1.267 {ECO:0000269|PubMed:19525322, ECO:0000269|PubMed:20580386}; AltName: Full=Anthocyanin-O-methyltransferase; Short=VvAOMT;	SubName: Full=Uncharacterized protein {ECO:0000313|EMBL:KNA05927.1};	O-methyltransferase	GO:0005737,cytoplasm; GO:0046872,metal ion binding; GO:0008171,O-methyltransferase activity; GO:0009718,anthocyanin-containing compound biosynthetic process; GO:0033485,cyanidin 3-O-glucoside biosynthetic process; GO:0033486,delphinidin 3-O-glucoside biosynthetic process; GO:0043473,pigmentation	O-methyltransferase
gene-LOC110712381	58.17	61.74	6.14	1.3	0.49	2.8	2060	2148	214	43	17	96	0.029	-5.115	1.01138e-05	0.000347476	down	NW_018745323.1	2409872	2414896	-	LOC110712381	--	K13416 brassinosteroid insensitive 1-associated receptor kinase 1 [EC:2.7.10.1 2.7.11.1] | (RefSeq) BRASSINOSTEROID INSENSITIVE 1-associated receptor kinase 1-like (A)	rust resistance kinase Lr10-like isoform X1 [Chenopodium quinoa]	RecName: Full=Rust resistance kinase Lr10 {ECO:0000312|EMBL:AAC49629.1}; EC=2.7.11.1; AltName: Full=Probable receptor-like serine/threonine-protein kinase LRK10; Flags: Precursor;	SubName: Full=Uncharacterized protein {ECO:0000313|EMBL:KNA25726.1};	Serine/threonine protein kinase	GO:0016021,integral component of membrane; GO:0005886,plasma membrane; GO:0005524,ATP binding; GO:0004674,protein serine/threonine kinase activity	Protein tyrosine kinase
gene-LOC110712560	1.75	2.01	3.32	0.29	0.6	0.46	39	44	73	6	13	10	0.164	-2.611	3.22841e-08	1.7941e-06	down	NW_018745323.1	1358082	1360484	+	LOC110712560	--	K07936 GTP-binding nuclear protein Ran | (RefSeq) GTP-binding nuclear protein Ran, testis-specific isoform-like (A)	GTP-binding nuclear protein Ran, testis-specific isoform-like [Chenopodium quinoa]	RecName: Full=GTP-binding nuclear protein Ran-3; Short=OsRan3; AltName: Full=Ras-related nuclear protein 3;	RecName: Full=GTP-binding nuclear protein {ECO:0000256|RuleBase:RU363057};	GTPase Ran/TC4/GSP1 (nuclear protein transport pathway), small G protein superfamily	GO:0005737,cytoplasm; GO:0005634,nucleus; GO:0005525,GTP binding; GO:0003924,GTPase activity; GO:0006606,protein import into nucleus; GO:0000054,ribosomal subunit export from nucleus	Ras family
gene-LOC110712665	12.43	8.74	15.4	1.7	1.8	1.52	447	309	545	57	63	53	0.118	-3.087	4.42814e-42	1.20404e-38	down	NW_018745324.1	677285	681826	+	LOC110712665	--	K19199 histone-lysine N-methyltransferase SETD3 [EC:2.1.1.43] | (RefSeq) ribulose-1,5 bisphosphate carboxylase oxygenase large subunit N-methyltransferase, putative isoform 1 (A)	histone-lysine N-methyltransferase setd3-like [Chenopodium quinoa]	RecName: Full=[Fructose-bisphosphate aldolase]-lysine N-methyltransferase, chloroplastic; EC=2.1.1.259; AltName: Full=Aldolases N-methyltransferase; AltName: Full=[Ribulose-bisphosphate carboxylase]-lysine N-methyltransferase-like; Short=AtLSMT-L; Short=LSMT-like enzyme; Flags: Precursor;	SubName: Full=Uncharacterized protein {ECO:0000313|EMBL:KNA19815.1};	N-methyltransferase	GO:0009507,chloroplast; GO:0009570,chloroplast stroma; GO:0030785,[ribulose-bisphosphate carboxylase]-lysine N-methyltransferase activity; GO:0016279,protein-lysine N-methyltransferase activity; GO:0018026,peptidyl-lysine monomethylation; GO:0018023,peptidyl-lysine trimethylation	Rubisco LSMT substrate-binding
gene-LOC110712676	0.14	0.32	0.24	0.02	0.04	0.07	10	22	17	1	3	5	0.156	-2.683	0.00186285	0.0297454	down	NW_018745324.1	4596828	4600542	+	LOC110712676	--	--	--	--	--	--	--	--
gene-LOC110712745	5.47	11.16	8.5	4.8	2.86	4.47	202	405	309	165	103	160	0.401	-1.32	0.00256382	0.0383334	down	NW_018742418.1	8429106	8431774	+	LOC110712745	--	K16222 Dof zinc finger protein DOF5.5 | (RefSeq) cyclic dof factor 1-like (A)	cyclic dof factor 1-like [Chenopodium quinoa]	RecName: Full=Cyclic dof factor 2; AltName: Full=Dof zinc finger protein DOF5.2; Short=AtDOF5.2;	SubName: Full=Uncharacterized protein {ECO:0000313|EMBL:KNA07649.1};	--	GO:0005634,nucleus; GO:0003700,DNA-binding transcription factor activity; GO:0046872,metal ion binding; GO:0043565,sequence-specific DNA binding; GO:0009908,flower development; GO:0006355,regulation of transcription, DNA-templated; GO:0006351,transcription, DNA-templated	Dof domain, zinc finger
gene-LOC110712785	1.6	3.68	1.15	0.04	0.04	0	44	99	31	1	1	0	0.009	-6.78	5.22457e-08	2.79331e-06	down	NW_018745336.1	68773	70144	-	LOC110712785	--	--	--	--	--	--	--	--
gene-LOC110712836	33.73	19.07	36.47	8.03	13.77	13.31	722	401	768	160	287	276	0.338	-1.566	2.40051e-07	1.13235e-05	down	NW_018745368.1	198369	199953	-	LOC110712836	--	K22438 trans-aconitate 3-methyltransferase [EC:2.1.1.145] | (RefSeq) trans-aconitate 3-methyltransferase-like (A)	putative methyltransferase DDB_G0268948 isoform X1 [Chenopodium quinoa]	--	SubName: Full=Uncharacterized protein {ECO:0000313|EMBL:KNA09932.1};	Methyltransferase	GO:0008168,methyltransferase activity	Methyltransferase domain
gene-LOC110712859	65.91	64.7	96.62	4.97	5.41	3.7	3090	2980	4457	217	247	168	0.053	-4.249	1.74653e-113	6.64853e-109	down	NW_018745382.1	59027	61485	+	LOC110712859	--	--	--	--	--	--	--	--
gene-LOC110712948	4.83	6.28	5.2	2.98	3.14	1.87	101	129	107	58	64	38	0.4	-1.322	0.000305505	0.00669456	down	NW_018745395.1	509577	512481	-	LOC110712948	--	--	--	--	--	--	--	--
gene-LOC110712962	0.74	1.37	0.15	0.14	0.02	0.02	39	71	8	7	1	1	0.061	-4.039	0.000248426	0.0055694	down	NW_018745395.1	499089	506156	-	LOC110712962	--	K13422 transcription factor MYC2 | (RefSeq) transcription factor MYC2-like (A)	putative transcription factor bHLH041 [Chenopodium quinoa]	RecName: Full=Putative transcription factor bHLH041; AltName: Full=Basic helix-loop-helix protein 41; Short=AtbHLH41; Short=bHLH 41; AltName: Full=Transcription factor EN 51; AltName: Full=bHLH transcription factor bHLH041;	SubName: Full=Uncharacterized protein {ECO:0000313|EMBL:KNA05187.1};	--	GO:0005634,nucleus; GO:0003677,DNA binding; GO:0003700,DNA-binding transcription factor activity; GO:0046983,protein dimerization activity; GO:0006355,regulation of transcription, DNA-templated; GO:0010200,response to chitin; GO:0006351,transcription, DNA-templated	Helix-loop-helix DNA-binding domain
gene-LOC110713038	0.87	3.29	5.08	0.84	0.63	0.18	30	111	172	27	21	6	0.154	-2.703	0.000134754	0.00329882	down	NW_018745403.1	832388	834572	-	LOC110713038	--	K13065 shikimate O-hydroxycinnamoyltransferase [EC:2.3.1.133] | (RefSeq) anthranilate N-benzoyltransferase protein 2-like (A)	anthranilate N-benzoyltransferase protein 2-like [Chenopodium quinoa]	RecName: Full=Anthranilate N-benzoyltransferase protein 2; EC=2.3.1.144; AltName: Full=Anthranilate N-hydroxycinnamoyl/benzoyltransferase 2;	SubName: Full=Uncharacterized protein {ECO:0000313|EMBL:KNA19134.1};	--	GO:0047672,anthranilate N-benzoyltransferase activity; GO:0009813,flavonoid biosynthetic process	Transferase family
gene-LOC110713051	0.63	0.18	0.78	0	0	0	18	5	22	0	0	0	0.011	-6.47	1.51735e-05	0.00049751	down	NW_018745403.1	608086	610664	+	LOC110713051	--	--	--	--	--	--	--	--
gene-LOC110713057	13.87	27.53	4.45	2.05	1.85	4.59	377	735	119	52	49	121	0.144	-2.8	0.000131057	0.00322076	down	NW_018745403.1	940558	942056	+	LOC110713057	--	K07761 metalloendoproteinase 5-MMP [EC:3.4.24.-] | (RefSeq) metalloendoproteinase 5-MMP-like (A)	metalloendoproteinase 3-MMP-like [Chenopodium quinoa]	RecName: Full=Metalloendoproteinase 2-MMP {ECO:0000303|PubMed:10574937}; Short=At2-MMP {ECO:0000303|PubMed:10574937}; EC=3.4.24.- {ECO:0000305}; Flags: Precursor;	SubName: Full=Uncharacterized protein {ECO:0000313|EMBL:KNA11877.1};	Gelatinase A and related matrix metalloproteases	GO:0031225,anchored component of membrane; GO:0031012,extracellular matrix; GO:0005886,plasma membrane; GO:0004222,metalloendopeptidase activity; GO:0008270,zinc ion binding; GO:0080186,developmental vegetative growth; GO:0007275,multicellular organism development; GO:1900056,negative regulation of leaf senescence; GO:2000028,regulation of photoperiodism, flowering; GO:0046686,response to cadmium…	Matrixin
gene-LOC110713059	1.97	1.78	2.55	0	0	0.08	26	23	33	0	0	1	0.012	-6.441	6.13396e-07	2.68701e-05	down	NW_018745403.1	774193	776467	+	LOC110713059	--	--	--	--	--	--	--	--
gene-LOC110713065	2.65	3.36	3.4	0.86	0.77	2.12	280	348	353	85	79	217	0.342	-1.549	0.00142891	0.0240151	down	NW_018745403.1	387911	394291	+	LOC110713065	--	K14400 pre-mRNA cleavage complex 2 protein Pcf11 | (RefSeq) LOW QUALITY PROTEIN: uncharacterized protein LOC111982967 (A)	protein MAIN-LIKE 1-like [Chenopodium quinoa]	RecName: Full=Protein MAIN-LIKE 1 {ECO:0000303|PubMed:24635680};	SubName: Full=Uncharacterized protein {ECO:0000313|EMBL:OMO50399.1};	--	GO:0005634,nucleus; GO:0008483,transaminase activity; GO:0016458,gene silencing; GO:0010073,meristem maintenance; GO:0010082,regulation of root meristem growth	Plant mobile domain
gene-LOC110713106	2.51	1.23	3.21	0	0.04	0	121	58	152	0	2	0	0.005	-7.533	1.12523e-11	1.05763e-09	down	NW_018745410.1	3980676	4000510	+	LOC110713106	--	--	--	--	--	--	--	--
gene-LOC110713114	1.42	0.93	1.66	0	0	0	84	54	97	0	0	0	0.002	-8.907	6.28544e-13	7.29476e-11	down	NW_018745410.1	4021030	4035161	+	LOC110713114	--	--	protein POLLEN DEFECTIVE IN GUIDANCE 1-like [Chenopodium quinoa]	RecName: Full=Protein POLLEN DEFECTIVE IN GUIDANCE 1;	SubName: Full=Uncharacterized protein {ECO:0000313|EMBL:KNA11813.1};	Predicted membrane protein	GO:0005788,endoplasmic reticulum lumen; GO:0016021,integral component of membrane; GO:0009793,embryo development ending in seed dormancy; GO:0035437,maintenance of protein localization in endoplasmic reticulum; GO:0010183,pollen tube guidance	Eukaryotic membrane protein family
gene-LOC110713115	4.05	7.79	7.59	0	0	0	45	85	83	0	0	0	0.002	-8.812	6.74713e-12	6.70609e-10	down	NW_018745410.1	4035596	4036415	-	LOC110713115	--	--	--	--	--	--	--	--
gene-LOC110713129	0.74	0.94	0.96	0.01	0	0.02	66	82	84	1	0	2	0.011	-6.485	2.22796e-12	2.38907e-10	down	NW_018745410.1	909883	915314	-	LOC110713129	--	K02218 casein kinase 1 [EC:2.7.11.1] | (RefSeq) uncharacterized protein LOC8069780 (A)	protein ALP1-like isoform X1 [Chenopodium quinoa]	RecName: Full=Protein ALP1-like {ECO:0000305}; EC=3.1.-.-;	SubName: Full=Uncharacterized protein {ECO:0000313|EMBL:KNA23802.1};	Predicted transposase	GO:0005634,nucleus; GO:0046872,metal ion binding; GO:0004518,nuclease activity	DDE superfamily endonuclease
gene-LOC110713166	2.34	2.03	3.14	1.27	1.56	1.31	103	88	136	52	67	56	0.47	-1.09	1.35481e-05	0.000452383	down	NW_018745410.1	2881603	2885781	-	LOC110713166	--	--	--	--	--	--	--	--
gene-LOC110713183	2.75	3.16	3.39	0.13	0.08	0.24	70	79	85	3	2	6	0.041	-4.614	2.01685e-15	3.23947e-13	down	NW_018745410.1	1197852	1200864	-	LOC110713183	--	K21437 ankyrin repeat domain-containing protein 13 | (RefSeq) uncharacterized protein LOC112523844 (A)	zinc finger BED domain-containing protein RICESLEEPER 1-like [Chenopodium quinoa]	RecName: Full=Zinc finger BED domain-containing protein RICESLEEPER 3; AltName: Full=Transposase-like protein RICESLEEPER 3;	SubName: Full=Uncharacterized protein {ECO:0000313|EMBL:KMS99565.1};	Tam3-transposase (Ac family)	GO:0005634,nucleus; GO:0003700,DNA-binding transcription factor activity; GO:0046872,metal ion binding; GO:0046983,protein dimerization activity; GO:0000977,RNA polymerase II regulatory region sequence-specific DNA binding; GO:0009791,post-embryonic development; GO:0006357,regulation of transcription by RNA polymerase II; GO:0006351,transcription, DNA-templated	hAT family C-terminal dimerisation region
gene-LOC110713216	0.49	0.43	0.89	0	0.1	0.07	15	13	27	0	3	2	0.08	-3.636	7.19332e-05	0.00193109	down	NW_018745410.1	6950960	6952882	+	LOC110713216	--	--	--	--	--	--	--	--
gene-LOC110713219	2.27	1.68	3.82	0	0	0	267	194	442	0	0	0	0.001	-10.819	7.24373e-19	2.08899e-16	down	NW_018745410.1	1213723	1225881	+	LOC110713219	--	--	uncharacterized protein LOC110713219 [Chenopodium quinoa]	--	SubName: Full=Uncharacterized protein {ECO:0000313|EMBL:KMS94884.1};	--	--	--
gene-LOC110713318	5.12	3.34	6.72	2.22	2.04	1.48	406	260	524	164	157	114	0.327	-1.615	2.97596e-10	2.31196e-08	down	NW_018745410.1	2946427	2951685	+	LOC110713318	--	K13420 LRR receptor-like serine/threonine-protein kinase FLS2 [EC:2.7.11.1] | (RefSeq) LRR receptor-like serine/threonine-protein kinase FLS2 (A)	receptor-like protein kinase [Chenopodium quinoa]	RecName: Full=Receptor-like protein kinase; EC=2.7.11.1; Flags: Precursor;	SubName: Full=Uncharacterized protein {ECO:0000313|EMBL:KNA12321.1};	--	GO:0005576,extracellular region; GO:0016021,integral component of membrane; GO:0005886,plasma membrane; GO:0005524,ATP binding; GO:0004674,protein serine/threonine kinase activity; GO:0019199,transmembrane receptor protein kinase activity; GO:0006468,protein phosphorylation	Protein kinase domain
gene-LOC110713336	0.33	0.32	1.15	0.04	0.01	0.06	28	26	95	3	1	5	0.058	-4.108	1.9998e-07	9.55986e-06	down	NW_018745413.1	12301	20108	+	LOC110713336	--	K15718 linoleate 9S-lipoxygenase [EC:1.13.11.58] | (RefSeq) probable linoleate 9S-lipoxygenase 5 (A)	probable linoleate 9S-lipoxygenase 5, partial [Chenopodium quinoa]	RecName: Full=Probable linoleate 9S-lipoxygenase 5; EC=1.13.11.58; AltName: Full=Leaf lipoxygenase;	RecName: Full=Lipoxygenase {ECO:0000256|RuleBase:RU003975}; EC=1.13.11.- {ECO:0000256|RuleBase:RU003975};	--	GO:0005737,cytoplasm; GO:0046872,metal ion binding; GO:0016702,oxidoreductase activity, acting on single donors with incorporation of molecular oxygen, incorporation of two atoms of oxygen; GO:0031408,oxylipin biosynthetic process	Lipoxygenase
gene-LOC110713365	2.24	2.34	2.83	0	0	0	154	158	192	0	0	0	0.001	-10.037	1.51309e-16	2.85142e-14	down	NW_018745413.1	6565764	6574737	+	LOC110713365	--	--	uncharacterized protein LOC110713365 [Chenopodium quinoa]	--	SubName: Full=Uncharacterized protein {ECO:0000313|EMBL:KNA03285.1}; Flags: Fragment;	--	--	--
gene-LOC110713384	0.78	0.65	0.52	0.17	0.14	0.03	29	24	19	6	5	1	0.14	-2.835	0.000137275	0.00335408	down	NW_018745413.1	4290259	4293535	+	LOC110713384	--	--	--	--	--	--	--	--
gene-LOC110713390	1.21	0.7	0.99	0	0	0	108	62	87	0	0	0	0.002	-9.061	4.26547e-13	5.09008e-11	down	NW_018745413.1	326106	335965	-	LOC110713390	--	--	uncharacterized protein LOC110713390 isoform X1 [Chenopodium quinoa]	--	SubName: Full=Uncharacterized protein {ECO:0000313|EMBL:KNA17427.1};	--	--	--
gene-LOC110713450	1.11	1.77	1.1	0.24	0.29	0.23	71	111	69	14	18	14	0.152	-2.72	1.78125e-08	1.03522e-06	down	NW_018745413.1	350667	355306	-	LOC110713450	--	K10706 senataxin [EC:3.6.4.-] | (RefSeq) uncharacterized LOC100262126 (A)	helicase sen1-like [Chenopodium quinoa]	RecName: Full=Probable helicase MAGATAMA 3; EC=3.6.4.-; AltName: Full=SEN1-like protein;	SubName: Full=Uncharacterized protein {ECO:0000313|EMBL:BAM64828.1};	tRNA-splicing endonuclease positive effector (SEN1)	GO:0005634,nucleus; GO:0005524,ATP binding; GO:0004386,helicase activity; GO:0009553,embryo sac development; GO:0010183,pollen tube guidance; GO:0009875,pollen-pistil interaction	AAA domain
gene-LOC110713522	2.32	2.4	1.69	1.11	0.96	1.26	186	189	133	83	75	98	0.427	-1.229	0.00132467	0.0226127	down	NW_018745419.1	585650	590463	-	LOC110713522	--	K01512 acylphosphatase [EC:3.6.1.7] | (RefSeq) uncharacterized protein LOC110713522 (A)	uncharacterized protein LOC110713522 [Chenopodium quinoa]	--	RecName: Full=Acylphosphatase {ECO:0000256|PROSITE-ProRule:PRU00520}; EC=3.6.1.7 {ECO:0000256|PROSITE-ProRule:PRU00520};	Acylphosphatase	GO:0003998,acylphosphatase activity	Acylphosphatase
gene-LOC110713549	2.4	1.82	3.42	0.34	0.22	0.28	157	117	220	21	14	18	0.096	-3.376	1.02065e-22	4.41514e-20	down	NW_018745448.1	6785456	6793519	-	LOC110713549	--	--	--	--	--	--	--	--
gene-LOC110713558	0.64	0.36	0.23	0	0.03	0	20	11	7	0	1	0	0.024	-5.397	0.000276497	0.00611231	down	NW_018745448.1	5838063	5845557	+	LOC110713558	--	K00660 chalcone synthase [EC:2.3.1.74] | (RefSeq) chalcone synthase-like (A)	chalcone synthase-like [Chenopodium quinoa]	RecName: Full=Chalcone synthase; EC=2.3.1.74; AltName: Full=Naringenin-chalcone synthase;	SubName: Full=Uncharacterized protein {ECO:0000313|EMBL:KNA03143.1};	--	GO:0016210,naringenin-chalcone synthase activity; GO:0009813,flavonoid biosynthetic process	Chalcone and stilbene synthases, N-terminal domain
gene-LOC110713561	22.18	60.13	31.23	9.63	9.64	8.33	371	988	514	150	157	135	0.193	-2.375	6.01656e-07	2.63862e-05	down	NW_018745448.1	26443	27279	+	LOC110713561	--	--	uncharacterized protein LOC110713561 [Chenopodium quinoa]	--	SubName: Full=Uncharacterized protein {ECO:0000313|EMBL:KNA21801.1};	--	--	Arabidopsis protein of unknown function
gene-LOC110713660	2.83	5.81	0.66	0.53	0.1	0.77	57	115	13	10	2	15	0.118	-3.088	0.00143138	0.0240368	down	NW_018745448.1	6575767	6577019	+	LOC110713660	--	K03671 thioredoxin 1 | (RefSeq) thioredoxin H1-like (A)	thioredoxin H1-like [Chenopodium quinoa]	RecName: Full=Thioredoxin H2; Short=AtTrxh2; AltName: Full=Thioredoxin 2; Short=AtTRX2;	SubName: Full=Uncharacterized protein {ECO:0000313|EMBL:KNA09715.1};	Thioredoxin	GO:0005829,cytosol; GO:0005739,mitochondrion; GO:0005886,plasma membrane; GO:0016671,oxidoreductase activity, acting on a sulfur group of donors, disulfide as acceptor; GO:0015035,protein disulfide oxidoreductase activity; GO:0047134,protein-disulfide reductase activity; GO:0004791,thioredoxin-disulfide reductase activity; GO:0045454,cell redox homeostasis; GO:0034599,cellular response to oxidati…	Thioredoxin
gene-LOC110713716	13.59	6.28	19.12	4.93	5.08	3.72	302	137	418	102	110	80	0.31	-1.688	9.93021e-07	4.2142e-05	down	NW_018745448.1	182150	184228	+	LOC110713716	--	--	--	--	--	--	--	--
gene-LOC110713899	3.64	4.25	2.46	1.08	0.76	0.97	54	62	36	15	11	14	0.221	-2.179	4.55015e-05	0.00130725	down	NW_018745454.1	541304	542046	-	LOC110713899	--	K11855 ubiquitin carboxyl-terminal hydrolase 36/42 [EC:3.4.19.12] | (RefSeq) ubiquitin carboxyl-terminal hydrolase 36 (A)	putative lipid-binding protein At4g00165 [Chenopodium quinoa]	RecName: Full=Putative lipid-binding protein At4g00165; Flags: Precursor;	SubName: Full=Uncharacterized protein {ECO:0000313|EMBL:KNA22234.1};	--	GO:0005576,extracellular region	Hydrophobic seed protein
gene-LOC110713950	9.47	8.22	12.9	4.47	5.5	5.24	382	326	512	168	216	205	0.425	-1.233	4.39126e-11	3.86055e-09	down	NW_018745454.1	5519549	5527131	+	LOC110713950	--	K23334 Ran-binding protein 9/10 | (RefSeq) ran-binding protein 10-like (A)	ran-binding protein 10-like [Chenopodium quinoa]	RecName: Full=Ran-binding protein M homolog {ECO:0000305}; Short=AtRanBPM {ECO:0000303|PubMed:22676313};	SubName: Full=Uncharacterized protein {ECO:0000313|EMBL:KNA26020.1};	SPRY domain-containing proteins	GO:0005737,cytoplasm; GO:0005634,nucleus; GO:0048471,perinuclear region of cytoplasm	CTLH/CRA C-terminal to LisH motif domain
gene-LOC110713990	21.78	19.95	11.31	3.9	4.52	4.62	599	539	306	100	121	123	0.197	-2.341	1.18804e-08	7.04439e-07	down	NW_018745454.1	4883903	4886739	-	LOC110713990	--	K13066 caffeic acid 3-O-methyltransferase [EC:2.1.1.68] | (RefSeq) caffeic acid 3-O-methyltransferase-like (A)	caffeic acid 3-O-methyltransferase-like [Chenopodium quinoa]	RecName: Full=Caffeic acid 3-O-methyltransferase; Short=CAOMT; Short=COMT; EC=2.1.1.68; AltName: Full=S-adenosysl-L-methionine:caffeic acid 3-O-methyltransferase;	SubName: Full=Uncharacterized protein {ECO:0000313|EMBL:KNA19527.1};	Hydroxyindole-O-methyltransferase and related SAM-dependent methyltransferases	GO:0047763,caffeate O-methyltransferase activity; GO:0046983,protein dimerization activity; GO:0009809,lignin biosynthetic process	O-methyltransferase domain
gene-LOC110714007	16.56	10.1	13.12	0	0	0	227	136	177	0	0	0	0.001	-10.139	2.0237e-16	3.6684e-14	down	NW_018745454.1	5873222	5874306	+	LOC110714007	--	--	--	--	--	--	--	--
gene-LOC110714054	73.81	98.38	25.63	21.72	12.31	31.68	2667	3492	911	731	433	1109	0.264	-1.924	0.00203521	0.0317779	down	NW_018745454.1	3457686	3461178	-	LOC110714054	--	K13459 disease resistance protein RPS2 | (RefSeq) disease resistance protein At4g27190 (A)	probable WRKY transcription factor 41 [Chenopodium quinoa]	RecName: Full=Probable WRKY transcription factor 41; AltName: Full=WRKY DNA-binding protein 41;	SubName: Full=Uncharacterized protein {ECO:0000313|EMBL:KNA14097.1};	--	GO:0005634,nucleus; GO:0003700,DNA-binding transcription factor activity; GO:0043565,sequence-specific DNA binding; GO:0006351,transcription, DNA-templated	WRKY DNA -binding domain
gene-LOC110714115	0.32	0.31	0.52	0.01	0.01	0.01	30	28	48	1	1	1	0.025	-5.316	2.35576e-08	1.34246e-06	down	NW_018745454.1	796774	801668	+	LOC110714115	--	--	uncharacterized protein LOC110714115 [Chenopodium quinoa]	--	SubName: Full=Uncharacterized protein {ECO:0000313|EMBL:KNA07589.1};	--	--	--
gene-LOC110714154	3.15	2.15	0.99	0.68	0.82	0.35	55	37	17	11	14	6	0.232	-2.109	0.00190515	0.0302054	down	NW_018745454.1	2914594	2917151	+	LOC110714154	--	--	desiccation protectant protein Lea14 homolog [Chenopodium quinoa]	RecName: Full=Desiccation protectant protein Lea14 homolog;	SubName: Full=Uncharacterized protein {ECO:0000313|EMBL:KNA19500.1};	--	GO:0009269,response to desiccation	Late embryogenesis abundant protein
gene-LOC110714239	3.55	3.11	6.78	1.35	0.16	0.07	158	136	297	56	7	3	0.105	-3.248	0.000203231	0.00469157	down	NW_018745454.1	3382032	3386141	+	LOC110714239	--	K23877 xyloglucan O-acetyltransferase | (RefSeq) protein ALTERED XYLOGLUCAN 4-like (A)	protein trichome birefringence-like 25 [Chenopodium quinoa]	RecName: Full=Protein trichome birefringence-like 25;	SubName: Full=Uncharacterized protein {ECO:0000313|EMBL:KNA21253.1};	--	GO:0005794,Golgi apparatus; GO:0016021,integral component of membrane; GO:0016413,O-acetyltransferase activity; GO:0071554,cell wall organization or biogenesis	GDSL/SGNH-like Acyl-Esterase family found in Pmr5 and Cas1p
gene-LOC110714409	0.23	0.61	0.38	0.05	0	0	5	13	8	1	0	0	0.034	-4.858	0.00164671	0.026973	down	NW_018745454.1	5575970	5577352	-	LOC110714409	--	--	uncharacterized protein LOC110714409 [Chenopodium quinoa]	--	--	--	--	Domain of unknown function (DUF4407)
gene-LOC110714418	0.81	0.97	0.87	0.02	0.02	0.02	41	48	43	1	1	1	0.019	-5.691	2.4788e-09	1.64678e-07	down	NW_018745454.1	5930921	5933527	+	LOC110714418	--	K13420 LRR receptor-like serine/threonine-protein kinase FLS2 [EC:2.7.11.1] | (RefSeq) LRR receptor-like serine/threonine-protein kinase FLS2 (A)	probable leucine-rich repeat receptor-like protein kinase At1g35710, partial [Chenopodium quinoa]	RecName: Full=LRR receptor-like serine/threonine-protein kinase GSO1 {ECO:0000303|PubMed:18088309}; EC=2.7.11.1 {ECO:0000255|PROSITE-ProRule:PRU00159}; AltName: Full=Protein GASSHO 1 {ECO:0000303|PubMed:18088309}; AltName: Full=Protein SCHENGEN 3 {ECO:0000303|PubMed:25233277}; Flags: Precursor;	SubName: Full=Uncharacterized protein {ECO:0000313|EMBL:KCW54188.1};	--	GO:0048226,Casparian strip; GO:0016021,integral component of membrane; GO:0005886,plasma membrane; GO:0005524,ATP binding; GO:0004674,protein serine/threonine kinase activity; GO:0071555,cell wall organization; GO:0009793,embryo development ending in seed dormancy; GO:0035987,endodermal cell differentiation; GO:0045184,establishment of protein localization; GO:0090558,plant epidermis development;…	Leucine Rich repeats (2 copies)
gene-LOC110714438	4.63	0.95	6.17	1	0.72	0.34	99	20	130	20	15	7	0.157	-2.667	7.06818e-05	0.00190827	down	NW_018745454.1	868301	869533	-	LOC110714438	--	--	uncharacterized protein LOC110714438 [Chenopodium quinoa]	--	SubName: Full=Uncharacterized protein {ECO:0000313|EMBL:KNA19245.1};	--	--	Protein of unknown function (DUF1442)
gene-LOC110714587	228.3	287.58	227.01	58.46	41.94	49.38	14034	17367	13730	3347	2510	2941	0.166	-2.589	1.3348e-15	2.22859e-13	down	NW_018745454.1	4903871	4920057	+	LOC110714587	--	K12133 MYB-related transcription factor LHY | (RefSeq) protein LHY-like isoform X1 (A)	protein LHY-like isoform X1 [Chenopodium quinoa]	RecName: Full=Protein LHY {ECO:0000303|PubMed:9657154}; AltName: Full=MYB-related transcription factor LHY {ECO:0000303|PubMed:9657154}; AltName: Full=Protein LATE ELONGATED HYPOCOTYL {ECO:0000303|PubMed:9657154};	SubName: Full=Uncharacterized protein {ECO:0000313|EMBL:KNA08541.1};	Zuotin and related molecular chaperones (DnaJ superfamily), contains DNA-binding domains	GO:0005634,nucleus; GO:0003700,DNA-binding transcription factor activity; GO:0044212,transcription regulatory region DNA binding; GO:0007623,circadian rhythm; GO:0048574,long-day photoperiodism, flowering; GO:0042754,negative regulation of circadian rhythm; GO:0043433,negative regulation of DNA-binding transcription factor activity; GO:0042752,regulation of circadian rhythm; GO:0006355,regulation…	Myb-like DNA-binding domain
gene-LOC110714652	7.82	10.36	7.54	0.45	0.46	0.84	471	613	447	25	27	49	0.056	-4.159	3.76449e-22	1.57476e-19	down	NW_018745454.1	6233862	6236875	-	LOC110714652	--	K13416 brassinosteroid insensitive 1-associated receptor kinase 1 [EC:2.7.10.1 2.7.11.1] | (RefSeq) BRASSINOSTEROID INSENSITIVE 1-associated receptor kinase 1-like (A)	G-type lectin S-receptor-like serine/threonine-protein kinase At1g34300 [Chenopodium quinoa]	RecName: Full=G-type lectin S-receptor-like serine/threonine-protein kinase At1g34300; EC=2.7.11.1; Flags: Precursor;	RecName: Full=Protein DETOXIFICATION {ECO:0000256|RuleBase:RU004914}; AltName: Full=Multidrug and toxic compound extrusion protein {ECO:0000256|RuleBase:RU004914};	--	GO:0016021,integral component of membrane; GO:0005886,plasma membrane; GO:0005524,ATP binding; GO:0005516,calmodulin binding; GO:0030246,carbohydrate binding; GO:0004674,protein serine/threonine kinase activity; GO:0006468,protein phosphorylation; GO:0048544,recognition of pollen	Protein kinase domain
gene-LOC110714721	2.87	2.51	3.86	0	0	0	179	154	237	0	0	0	0.001	-10.194	3.30003e-17	6.94045e-15	down	NW_018745461.1	15279	20148	+	LOC110714721	--	K23222 nuclease HARBI1 [EC:3.1.-.-] | (RefSeq) uncharacterized protein LOC104242359 (A)	uncharacterized protein LOC110714721 isoform X1 [Chenopodium quinoa]	--	SubName: Full=Uncharacterized protein {ECO:0000313|EnsemblPlants:TRIAE_CS42_3DS_TGACv1_271976_AA0912150.1};	Predicted transposase	--	--
gene-LOC110714780	0.66	0.89	0.41	0.02	0.02	0.02	67	88	41	2	2	2	0.025	-5.318	4.80797e-11	4.19782e-09	down	NW_018745461.1	2588679	2595203	+	LOC110714780	--	K15078 structure-specific endonuclease subunit SLX1 [EC:3.6.1.-] | (RefSeq) putative disease resistance protein RGA3 (A)	putative disease resistance RPP13-like protein 1 [Chenopodium quinoa]	RecName: Full=Putative disease resistance RPP13-like protein 1;	SubName: Full=Uncharacterized protein {ECO:0000313|EMBL:KNA19228.1};	Apoptotic ATPase	GO:0005886,plasma membrane; GO:0043531,ADP binding; GO:0005524,ATP binding; GO:0009626,plant-type hypersensitive response; GO:0007165,signal transduction	Leucine rich repeat
gene-LOC110714880	6.09	9.56	2.82	0.37	0.16	0.58	391	603	178	22	10	36	0.048	-4.387	5.59387e-11	4.83958e-09	down	NW_018745461.1	99391	119076	+	LOC110714880	--	--	--	--	--	--	--	--
gene-LOC110714932	2.52	7.17	2.74	1.47	0.55	1.7	99	277	106	54	21	65	0.241	-2.053	0.00210094	0.0326036	down	NW_018745461.1	759369	761337	-	LOC110714932	--	--	--	--	--	--	--	--
gene-LOC110714950	30.64	55.06	50.67	19.11	28.02	8.46	673	1188	1095	391	599	180	0.328	-1.608	0.000323002	0.0070382	down	NW_018745461.1	960546	962998	+	LOC110714950	--	K08235 xyloglucan:xyloglucosyl transferase [EC:2.4.1.207] | (RefSeq) xyloglucan endotransglucosylase/hydrolase 2-like (A)	xyloglucan endotransglucosylase/hydrolase 2-like [Chenopodium quinoa]	RecName: Full=Xyloglucan endotransglucosylase/hydrolase 2 {ECO:0000250|UniProtKB:Q38857}; EC=2.4.1.207 {ECO:0000250|UniProtKB:Q38857}; AltName: Full=Brassinosteroid-regulated protein BRU1 {ECO:0000303|PubMed:8115544}; Flags: Precursor;	RecName: Full=Xyloglucan endotransglucosylase/hydrolase {ECO:0000256|RuleBase:RU361120}; EC=2.4.1.207 {ECO:0000256|RuleBase:RU361120};	--	GO:0048046,apoplast; GO:0005618,cell wall; GO:0004553,hydrolase activity, hydrolyzing O-glycosyl compounds; GO:0016762,xyloglucan:xyloglucosyl transferase activity; GO:0042546,cell wall biogenesis; GO:0010411,xyloglucan metabolic process	Glycosyl hydrolases family 16
gene-LOC110715014	6.16	5.05	8.63	2.78	2.87	2.39	364	293	502	153	165	137	0.348	-1.524	8.43525e-16	1.42082e-13	down	NW_018745461.1	461449	473480	-	LOC110715014	--	K12309 beta-galactosidase [EC:3.2.1.23] | (RefSeq) BGAL2; beta-galactosidase 2 (A)	beta-galactosidase 9-like [Chenopodium quinoa]	RecName: Full=Beta-galactosidase 9; Short=Lactase 9; EC=3.2.1.23; Flags: Precursor;	RecName: Full=Beta-galactosidase {ECO:0000256|RuleBase:RU000675}; EC=3.2.1.23 {ECO:0000256|RuleBase:RU000675};	Beta-galactosidase	GO:0048046,apoplast; GO:0009505,plant-type cell wall; GO:0005774,vacuolar membrane; GO:0005773,vacuole; GO:0004565,beta-galactosidase activity; GO:0030246,carbohydrate binding; GO:0005975,carbohydrate metabolic process	Glycosyl hydrolases family 35
gene-LOC110715071	0.79	0.64	1.31	0	0	0.02	39	31	64	0	0	1	0.007	-7.116	1.8924e-08	1.0948e-06	down	NW_018742433.1	220291	229520	-	LOC110715071	--	--	uncharacterized protein LOC110715071 [Chenopodium quinoa]	--	SubName: Full=Uncharacterized protein {ECO:0000313|EMBL:KZM80567.1};	--	--	--
gene-LOC110715099	9.27	31.63	2.18	0	0	0.09	108	362	25	0	0	1	0.002	-9.252	1.23921e-09	8.62395e-08	down	NW_018745470.1	1762333	1763623	+	LOC110715099	--	--	--	--	--	--	--	--
gene-LOC110715253	7.07	6.8	7.18	4.76	4.62	2.92	110	104	110	69	70	44	0.484	-1.046	0.000977795	0.0177331	down	NW_018745488.1	595907	599584	+	LOC110715253	--	--	--	--	--	--	--	--
gene-LOC110715466	1.79	1.9	1.82	0.33	0.24	0.24	23	24	23	4	3	3	0.123	-3.025	1.00038e-05	0.000344008	down	NW_018745523.1	2368782	2369423	+	LOC110715466	--	--	uncharacterized protein LOC110715466 [Chenopodium quinoa]	--	SubName: Full=Uncharacterized protein {ECO:0000313|EMBL:KNA12996.1};	--	--	Cotton fibre expressed protein
gene-LOC110715485	1.14	1.4	1.05	0.47	0.49	0.58	57	69	52	22	24	28	0.352	-1.505	0.000430111	0.00893428	down	NW_018745523.1	3366806	3372727	+	LOC110715485	--	K00850 6-phosphofructokinase 1 [EC:2.7.1.11] | (RefSeq) ATP-dependent 6-phosphofructokinase 3-like (A)	ATP-dependent 6-phosphofructokinase 3-like [Chenopodium quinoa]	RecName: Full=ATP-dependent 6-phosphofructokinase 3 {ECO:0000255|HAMAP-Rule:MF_03186}; Short=ATP-PFK 3 {ECO:0000255|HAMAP-Rule:MF_03186}; Short=Phosphofructokinase 3 {ECO:0000255|HAMAP-Rule:MF_03186}; EC=2.7.1.11 {ECO:0000255|HAMAP-Rule:MF_03186}; AltName: Full=Phosphohexokinase 3 {ECO:0000255|HAMAP-Rule:MF_03186};	RecName: Full=ATP-dependent 6-phosphofructokinase {ECO:0000256|HAMAP-Rule:MF_03186}; Short=ATP-PFK {ECO:0000256|HAMAP-Rule:MF_03186}; Short=Phosphofructokinase {ECO:0000256|HAMAP-Rule:MF_03186}; EC=2.7.1.11 {ECO:0000256|HAMAP-Rule:MF_03186}; AltName: Full=Phosphohexokinase {ECO:0000256|HAMAP-Rule:MF_03186};	Pyrophosphate-dependent phosphofructo-1-kinase	GO:0005829,cytosol; GO:0003872,6-phosphofructokinase activity; GO:0005524,ATP binding; GO:0046872,metal ion binding; GO:0006002,fructose 6-phosphate metabolic process; GO:0006096,glycolytic process; GO:0010053,root epidermal cell differentiation	Phosphofructokinase
gene-LOC110715500	13.75	12.65	29.48	3.06	3.6	4.12	831	751	1753	172	212	241	0.171	-2.544	1.17582e-17	2.63294e-15	down	NW_018745523.1	3540429	3550891	-	LOC110715500	--	K16224 senescence-induced receptor-like serine/threonine-protein kinase | (RefSeq) senescence-induced receptor-like serine/threonine-protein kinase (A)	LOW QUALITY PROTEIN: probable LRR receptor-like serine/threonine-protein kinase At4g29180 [Chenopodium quinoa]	RecName: Full=Probable LRR receptor-like serine/threonine-protein kinase At4g29180; EC=2.7.11.1; Flags: Precursor;	SubName: Full=Uncharacterized protein {ECO:0000313|EMBL:KNA18110.1};	--	GO:0016021,integral component of membrane; GO:0005524,ATP binding; GO:0004674,protein serine/threonine kinase activity	Malectin-like domain
gene-LOC110715505	0.24	0.36	0.41	0	0	0	11	16	18	0	0	0	0.011	-6.554	3.1945e-06	0.00012112	down	NW_018745523.1	4611206	4619124	+	LOC110715505	--	--	--	--	--	--	--	--
gene-LOC110715585	0.64	0.49	0.83	0	0	0	25	19	32	0	0	0	0.006	-7.281	2.80134e-08	1.57516e-06	down	NW_018745523.1	4314579	4318532	-	LOC110715585	--	K11843 ubiquitin carboxyl-terminal hydrolase 14 [EC:3.4.19.12] | (RefSeq) FBD-associated F-box protein At4g10400-like (A)	F-box/FBD/LRR-repeat protein At1g51370-like [Chenopodium quinoa]	RecName: Full=Putative F-box/FBD/LRR-repeat protein At5g44950;	SubName: Full=Uncharacterized protein {ECO:0000313|EMBL:ONI15651.1};	--	--	F-box domain
gene-LOC110715674	1.12	6.89	0.36	0.23	0.24	0.15	83	503	26	16	17	11	0.053	-4.234	1.04794e-05	0.000359064	down	NW_018745523.1	3470251	3490168	-	LOC110715674	--	K16224 senescence-induced receptor-like serine/threonine-protein kinase | (RefSeq) hypothetical protein (A)	putative leucine-rich repeat receptor-like serine/threonine-protein kinase At2g19230 isoform X1 [Chenopodium quinoa]	RecName: Full=Putative leucine-rich repeat receptor-like serine/threonine-protein kinase At2g19230; EC=2.7.11.1; Flags: Precursor;	SubName: Full=Uncharacterized protein {ECO:0000313|EMBL:GAY56427.1};	--	GO:0016021,integral component of membrane; GO:0005886,plasma membrane; GO:0005524,ATP binding; GO:0004674,protein serine/threonine kinase activity	Malectin-like domain
gene-LOC110715998	7.41	4.74	9.12	0	0.05	0.05	151	95	183	0	1	1	0.004	-7.918	1.37323e-13	1.71392e-11	down	NW_018745538.1	151025	154744	+	LOC110715998	--	--	uncharacterized protein LOC110715998 [Chenopodium quinoa]	--	--	--	--	--
gene-LOC110715999	4.33	5.74	8.1	0	0	0	145	189	267	0	0	0	0.001	-10.272	5.41734e-17	1.09692e-14	down	NW_018745538.1	146306	150900	-	LOC110715999	--	--	--	--	--	--	--	--
gene-LOC110716066	1	3.33	21.05	0.6	0.5	0.54	27	88	558	15	13	14	0.063	-3.989	2.32087e-06	9.11751e-05	down	NW_018745540.1	1548541	1564590	+	LOC110716066	--	K00059 3-oxoacyl-[acyl-carrier protein] reductase [EC:1.1.1.100] | (RefSeq) short chain dehydrogenase mdpC-like (A)	glucose and ribitol dehydrogenase-like [Chenopodium quinoa]	RecName: Full=Glucose and ribitol dehydrogenase; EC=1.1.1.-; AltName: Full=Carrot ABA-induced in somatic embryos 5 protein;	SubName: Full=Uncharacterized protein {ECO:0000313|EMBL:KNA13602.1};	Reductases with broad range of substrate specificities	GO:0016491,oxidoreductase activity	Enoyl-(Acyl carrier protein) reductase
gene-LOC110716163	0.56	0.68	0.68	0.14	0.17	0.03	21	25	25	5	6	1	0.143	-2.802	6.79421e-05	0.00184608	down	NW_018745544.1	33416	37324	+	LOC110716163	--	K21435 ankyrin repeat domain-containing protein 6 | (RefSeq) espin (A)	ankyrin repeat-containing protein ITN1-like [Chenopodium quinoa]	RecName: Full=Ankyrin repeat-containing protein ITN1; AltName: Full=Protein INCREASED TOLERANCE TO NACL {ECO:0000303|PubMed:18643991};	SubName: Full=Uncharacterized protein {ECO:0000313|EMBL:KMS94826.1};	FOG: Ankyrin repeat	GO:0016021,integral component of membrane; GO:0005634,nucleus; GO:0005886,plasma membrane; GO:0034613,cellular protein localization; GO:0009651,response to salt stress; GO:0007165,signal transduction	Domain of unknown function
gene-LOC110716167	1.88	2.4	0.49	0	0	0.03	66	83	17	0	0	1	0.005	-7.604	1.02765e-07	5.22989e-06	down	NW_018745544.1	98809	102571	+	LOC110716167	--	--	--	--	--	--	--	--
gene-LOC110716196	27.82	34.56	25.29	3.53	2.74	2.79	804	981	719	95	77	78	0.084	-3.568	7.45559e-25	4.50495e-22	down	NW_018745546.1	841467	856456	-	LOC110716196	--	--	uncharacterized protein At4g15545-like [Chenopodium quinoa]	RecName: Full=Uncharacterized protein At4g15545;	SubName: Full=Uncharacterized protein {ECO:0000313|EMBL:KNA24902.1};	--	GO:0016021,integral component of membrane; GO:0005886,plasma membrane; GO:0022857,transmembrane transporter activity	Filament-like plant protein, long coiled-coil
gene-LOC110716330	58.47	63.97	58.82	43.06	15.89	19.55	3210	3450	3177	2202	849	1040	0.363	-1.462	0.00101893	0.0183324	down	NW_018742441.1	625193	639641	-	LOC110716330	--	--	protein LNK2-like [Chenopodium quinoa]	RecName: Full=Protein LNK2 {ECO:0000303|PubMed:23818596}; AltName: Full=Night light-inducible and clock-regulated 2 {ECO:0000303|PubMed:23818596};	SubName: Full=Uncharacterized protein {ECO:0000313|EMBL:KNA11738.1}; Flags: Fragment;	--	GO:0005634,nucleus; GO:0006355,regulation of transcription, DNA-templated; GO:0048511,rhythmic process; GO:0006351,transcription, DNA-templated	--
gene-LOC110716389	4.8	3.42	8.48	1.4	1.69	1.33	253	177	440	69	87	68	0.233	-2.101	2.42931e-13	2.96399e-11	down	NW_018742204.1	10748328	10754302	+	LOC110716389	--	K12135 zinc finger protein CONSTANS | (RefSeq) zinc finger protein CONSTANS (A)	putative zinc finger protein At1g68190 [Chenopodium quinoa]	RecName: Full=Putative zinc finger protein At1g68190;	SubName: Full=Uncharacterized protein {ECO:0000313|EMBL:KNA08945.1};	--	GO:0005634,nucleus; GO:0003700,DNA-binding transcription factor activity; GO:0008270,zinc ion binding; GO:0006355,regulation of transcription, DNA-templated	B-box zinc finger
gene-LOC110716399	2.03	1.07	2	0.86	0.63	0.51	33	17	32	13	10	8	0.335	-1.577	0.00288977	0.0417318	down	NW_018742441.1	939498	941134	+	LOC110716399	--	--	--	--	--	--	--	--
gene-LOC110716429	5.38	4.67	5.73	2.37	4.12	2.22	185	158	194	76	138	74	0.457	-1.13	0.000100915	0.00258516	down	NW_018745584.1	550696	560223	-	LOC110716429	--	--	UNC93-like protein 3 [Chenopodium quinoa]	RecName: Full=UNC93-like protein 3;	SubName: Full=Uncharacterized protein {ECO:0000313|EMBL:KNA09657.1};	Predicted membrane protein	GO:0016021,integral component of membrane	Ion channel regulatory protein UNC-93
gene-LOC110716470	219.58	156.77	123.22	112.85	89.35	86.43	4059	2847	2241	1943	1608	1548	0.473	-1.081	0.00250406	0.0376144	down	NW_018745587.1	673006	675498	+	LOC110716470	--	K17609 nucleoredoxin [EC:1.8.1.8] | (RefSeq) probable nucleoredoxin 1-2 (A)	uncharacterized protein LOC110716470 [Chenopodium quinoa]	RecName: Full=Probable nucleoredoxin 1-1; Short=OsNrx1-1; EC=1.8.1.8;	SubName: Full=Uncharacterized protein {ECO:0000313|EMBL:OAY86123.1};	--	GO:0005737,cytoplasm; GO:0047134,protein-disulfide reductase activity; GO:0004791,thioredoxin-disulfide reductase activity; GO:0045454,cell redox homeostasis	C1 domain
gene-LOC110716479	2.96	3.42	0.04	0.09	0	0.04	68	77	1	2	0	1	0.016	-5.929	5.91964e-05	0.00163648	down	NW_018745587.1	133055	138748	+	LOC110716479	--	K17607 type 2A phosphatase activator TIP41 | (RefSeq) TIP41-like protein (A)	TIP41-like protein [Chenopodium quinoa]	RecName: Full=TIP41-like protein {ECO:0000312|EMBL:AEE86352.1};	SubName: Full=Uncharacterized protein {ECO:0000313|EMBL:KNA10442.1};	Uncharacterized conserved protein	GO:0005829,cytosol	TIP41-like family
gene-LOC110716499	4.16	11.62	0.89	0.34	0.2	0.82	105	288	22	8	5	20	0.062	-4.003	2.35018e-05	0.000728537	down	NW_018745587.1	271732	272993	+	LOC110716499	--	--	uncharacterized protein LOC110716499 [Chenopodium quinoa]	RecName: Full=Basic secretory protease {ECO:0000303|PubMed:22773449}; EC=3.4.24.- {ECO:0000269|PubMed:22773449}; AltName: Full=Boswellia basic secretory protease {ECO:0000303|PubMed:22773449}; Short=BBSP {ECO:0000303|PubMed:22773449}; Flags: Fragments;	SubName: Full=Uncharacterized protein {ECO:0000313|EMBL:PKI71670.1};	--	GO:0046872,metal ion binding; GO:0008237,metallopeptidase activity	Peptidase of plants and bacteria
gene-LOC110716570	35.78	21.9	29.1	1.35	2.47	2.13	1282	771	1026	45	86	74	0.057	-4.126	7.09153e-39	1.34977e-35	down	NW_018745617.1	1776737	1780633	+	LOC110716570	--	K01102 pyruvate dehydrogenase phosphatase [EC:3.1.3.43] | (RefSeq) probable protein phosphatase 2C 63 (A)	probable protein phosphatase 2C 63 [Chenopodium quinoa]	RecName: Full=Probable protein phosphatase 2C 63; Short=AtPP2C63; EC=3.1.3.16;	SubName: Full=Uncharacterized protein {ECO:0000313|EMBL:KNA15680.1};	Protein phosphatase 2C/pyruvate dehydrogenase (lipoamide) phosphatase	GO:0046872,metal ion binding; GO:0004722,protein serine/threonine phosphatase activity	Protein phosphatase 2C
gene-LOC110716659	0.06	0.23	0.06	0	0	0	4	16	4	0	0	0	0.018	-5.786	0.00105174	0.0187304	down	NW_018745617.1	966115	969768	-	LOC110716659	--	K20181 vacuolar protein sorting-associated protein 18 | (RefSeq) vacuolar sorting-associated-like protein (A)	probable LRR receptor-like serine/threonine-protein kinase At3g47570 [Chenopodium quinoa]	RecName: Full=Probable LRR receptor-like serine/threonine-protein kinase At3g47570; EC=2.7.11.1; Flags: Precursor;	SubName: Full=Uncharacterized protein {ECO:0000313|EMBL:KNA05118.1};	--	GO:0016021,integral component of membrane; GO:0005886,plasma membrane; GO:0005524,ATP binding; GO:0004674,protein serine/threonine kinase activity	Protein kinase domain
gene-LOC110716699	1.28	0.38	1.55	0	0.13	0.03	41	12	49	0	4	1	0.044	-4.52	2.67277e-06	0.000103715	down	NW_018745617.1	317498	321497	+	LOC110716699	--	K01047 secretory phospholipase A2 [EC:3.1.1.4] | (RefSeq) phospholipase A2 homolog 3-like (A)	probable phospholipase A2 homolog 1 [Chenopodium quinoa]	RecName: Full=Probable phospholipase A2 homolog 1; EC=3.1.1.4; Flags: Precursor;	SubName: Full=Uncharacterized protein {ECO:0000313|EMBL:KNA06828.1};	--	GO:0005576,extracellular region; GO:0005509,calcium ion binding; GO:0004623,phospholipase A2 activity; GO:0102567,phospholipase A2 activity (consuming 1,2-dipalmitoylphosphatidylcholine); GO:0102568,phospholipase A2 activity consuming 1,2-dioleoylphosphatidylethanolamine); GO:0050482,arachidonic acid secretion; GO:0016042,lipid catabolic process; GO:0006644,phospholipid metabolic process	Phospholipase A2
gene-LOC110716711	3.52	3.02	1.27	0	0.24	0.32	45	38	16	0	3	4	0.058	-4.119	9.10117e-06	0.00031582	down	NW_018745617.1	973378	975118	+	LOC110716711	--	--	--	--	--	--	--	--
gene-LOC110716854	1.87	1.46	1.49	0.46	1.18	0.56	52	40	41	12	32	15	0.371	-1.429	0.00323594	0.0454549	down	NW_018745650.1	2846885	2853648	+	LOC110716854	--	K14684 solute carrier family 25 (mitochondrial phosphate transporter), member 23/24/25/41 | (RefSeq) hypothetical protein (A)	mitochondrial carrier protein CoAc2-like [Chenopodium quinoa]	RecName: Full=Mitochondrial carrier protein CoAc2 {ECO:0000305}; AltName: Full=AtCoAc2 {ECO:0000303|PubMed:23590975}; AltName: Full=Mitochondrial coenzyme A transporter CoAc2 {ECO:0000305};	SubName: Full=Uncharacterized protein {ECO:0000313|EMBL:KNA06358.1};	Mitochondrial solute carrier protein	GO:0016021,integral component of membrane; GO:0005743,mitochondrial inner membrane; GO:0005739,mitochondrion; GO:0015228,coenzyme A transmembrane transporter activity; GO:1990559,mitochondrial coenzyme A transmembrane transport	Mitochondrial carrier protein
gene-LOC110716937	20.54	12.67	18.39	5.63	11.3	5.14	1117	677	984	285	598	271	0.353	-1.503	5.54279e-06	0.00020095	down	NW_018745650.1	2221919	2230397	+	LOC110716937	--	K15920 xylan 1,4-beta-xylosidase [EC:3.2.1.37] | (RefSeq) beta-xylosidase/alpha-L-arabinofuranosidase 2-like (A)	beta-xylosidase/alpha-L-arabinofuranosidase 2-like [Chenopodium quinoa]	RecName: Full=Beta-xylosidase/alpha-L-arabinofuranosidase 2 {ECO:0000303|PubMed:17615411, ECO:0000312|EMBL:ABQ45228.1}; AltName: Full=Xylan 1,4-beta-xylosidase/Alpha-L-arabinofuranosidase 2; Short=MsXyl2 {ECO:0000303|PubMed:17615411}; Includes: RecName: Full=Beta-xylosidase; EC=3.2.1.37; AltName: Full=1,4-beta-D-xylan xylohydrolase {ECO:0000250|UniProtKB:P48792}; AltName: Full=Xylan 1,4-beta-xylo…	SubName: Full=Uncharacterized protein {ECO:0000313|EMBL:KNA08510.1};	--	GO:0005578,NA; GO:0046556,alpha-L-arabinofuranosidase activity; GO:0009044,xylan 1,4-beta-xylosidase activity; GO:0045493,xylan catabolic process	Glycosyl hydrolase family 3 C-terminal domain
gene-LOC110716959	2.04	1.84	2.72	0	0.06	0	35	31	46	0	1	0	0.008	-6.887	5.39323e-08	2.87541e-06	down	NW_018745650.1	4755469	4757387	-	LOC110716959	--	--	--	--	--	--	--	--
gene-LOC110717114	1.78	1.12	3.83	0	0	0	42	26	89	0	0	0	0.003	-8.259	2.7597e-10	2.15716e-08	down	NW_018745653.1	413945	415229	+	LOC110717114	--	--	--	--	--	--	--	--
gene-LOC110717179	1.97	3.94	1.97	0.58	0.94	1.12	58	114	57	16	27	32	0.268	-1.898	0.0005828	0.0116215	down	NW_018745666.1	302494	304218	+	LOC110717179	--	K19891 glucan endo-1,3-beta-glucosidase 1/2/3 [EC:3.2.1.39] | (RefSeq) glucan endo-1,3-beta-glucosidase 3-like (A)	glucan endo-1,3-beta-glucosidase-like [Chenopodium quinoa]	RecName: Full=Probable glucan endo-1,3-beta-glucosidase At4g16260 {ECO:0000305}; EC=3.2.1.39 {ECO:0000305}; Flags: Precursor;	SubName: Full=Uncharacterized protein {ECO:0000313|EMBL:KNA22623.1};	--	GO:0046658,anchored component of plasma membrane; GO:0005618,cell wall; GO:0005576,extracellular region; GO:0005774,vacuolar membrane; GO:0042973,glucan endo-1,3-beta-D-glucosidase activity; GO:0004553,hydrolase activity, hydrolyzing O-glycosyl compounds; GO:0030247,polysaccharide binding; GO:0005975,carbohydrate metabolic process; GO:0009817,defense response to fungus, incompatible interaction; …	Glycosyl hydrolases family 17
gene-LOC110717185	30.25	63.57	13.34	11.74	8.77	10.91	758	1565	329	274	214	265	0.225	-2.151	0.000478063	0.00976835	down	NW_018745666.1	285828	287225	+	LOC110717185	--	K19891 glucan endo-1,3-beta-glucosidase 1/2/3 [EC:3.2.1.39] | (RefSeq) glucan endo-1,3-beta-glucosidase 3-like (A)	glucan endo-1,3-beta-glucosidase-like [Chenopodium quinoa]	RecName: Full=Glucan endo-1,3-beta-glucosidase, basic isoform; EC=3.2.1.39; AltName: Full=(1->3)-beta-glucan endohydrolase; Short=(1->3)-beta-glucanase; AltName: Full=Beta-1,3-endoglucanase; AltName: Full=PpGns1; Flags: Precursor;	SubName: Full=Uncharacterized protein {ECO:0000313|EMBL:KNA19873.1};	--	GO:0042973,glucan endo-1,3-beta-D-glucosidase activity; GO:0005975,carbohydrate metabolic process; GO:0006952,defense response; GO:0009607,response to biotic stimulus	Glycosyl hydrolases family 17
gene-LOC110717253	1.28	1.14	2.8	0.13	0.04	0	32	28	69	3	1	0	0.028	-5.142	1.03899e-08	6.18953e-07	down	NW_018745675.1	2323897	2328685	-	LOC110717253	--	--	--	--	--	--	--	--
gene-LOC110717424	106.44	175.37	80.28	0.08	0	0.07	1489	2410	1105	1	0	1	0	-11.581	1.28675e-24	7.31083e-22	down	NW_018745684.1	6349700	6351047	+	LOC110717424	--	--	uncharacterized protein LOC110717424 [Chenopodium quinoa]	--	SubName: Full=Uncharacterized protein {ECO:0000313|EMBL:KNA05751.1};	--	--	--
gene-LOC110717589	19.01	25.37	6.41	1.87	1.1	7.31	196	257	65	18	11	73	0.163	-2.613	0.00152657	0.0253542	down	NW_018742455.1	1642438	1642953	+	LOC110717589	--	--	uncharacterized protein LOC110717589 [Chenopodium quinoa]	RecName: Full=Sigma factor binding protein 1, chloroplastic; Short=AtsibI; Short=Sigma factor binding protein I; AltName: Full=SigA binding protein; AltName: Full=VQ motif-containing protein 23 {ECO:0000303|PubMed:22535423}; Short=AtVQ23 {ECO:0000303|PubMed:22535423}; Flags: Precursor;	SubName: Full=Uncharacterized protein {ECO:0000313|EMBL:KNA10947.1};	--	GO:0009507,chloroplast; GO:0005634,nucleus; GO:0071482,cellular response to light stimulus; GO:0009816,defense response to bacterium, incompatible interaction; GO:0051091,positive regulation of DNA-binding transcription factor activity	VQ motif
gene-LOC110717749	0.26	0.33	0.28	0	0	0	20	25	21	0	0	0	0.007	-7.136	1.28832e-07	6.41916e-06	down	NW_018745684.1	7215966	7227427	+	LOC110717749	--	--	uncharacterized protein LOC110717749 [Chenopodium quinoa]	--	SubName: Full=Uncharacterized protein {ECO:0000313|EMBL:KMS64717.1}; Flags: Fragment;	--	--	--
gene-LOC110717791	5.93	9.56	2.89	1.16	0.38	1.27	317	502	152	58	20	66	0.123	-3.027	4.6904e-06	0.000172678	down	NW_018745684.1	6557496	6561168	-	LOC110717791	--	--	--	--	--	--	--	--
gene-LOC110717833	5.14	9.42	4.65	3.56	2.69	2.8	110	198	98	71	56	58	0.376	-1.411	0.00325229	0.0456339	down	NW_018745684.1	3003899	3007525	-	LOC110717833	--	--	plastid-lipid-associated protein 6, chloroplastic-like [Chenopodium quinoa]	RecName: Full=Plastid-lipid-associated protein 6, chloroplastic {ECO:0000303|PubMed:16850419}; AltName: Full=Fibrillin-4 {ECO:0000303|PubMed:16461379}; AltName: Full=Fibrillin-6 {ECO:0000303|PubMed:18455927}; AltName: Full=Harpin-binding protein 1 {ECO:0000303|Ref.1}; Short=HrBP1 {ECO:0000303|Ref.1}; AltName: Full=Plastoglobulin 30.4 {ECO:0000303|PubMed:16414959}; Short=AtPGL30.4 {ECO:0000303|Pub…	SubName: Full=Uncharacterized protein {ECO:0000313|EMBL:KNA24114.1};	--	GO:0009507,chloroplast; GO:0009941,chloroplast envelope; GO:0009534,chloroplast thylakoid; GO:0009535,chloroplast thylakoid membrane; GO:0016020,membrane; GO:0005634,nucleus; GO:0005886,plasma membrane; GO:0010287,plastoglobule; GO:0009579,thylakoid; GO:0031977,thylakoid lumen; GO:0009658,chloroplast organization; GO:0042742,defense response to bacterium; GO:0010193,response to ozone	PAP_fibrillin
gene-LOC110717850	1.02	1.24	1.45	0.37	0.28	0.36	67	80	94	23	18	23	0.232	-2.106	1.6456e-08	9.60783e-07	down	NW_018745684.1	9164121	9167419	-	LOC110717850	--	K15078 structure-specific endonuclease subunit SLX1 [EC:3.6.1.-] | (RefSeq) putative disease resistance protein RGA1 (A)	putative disease resistance protein RGA3 [Chenopodium quinoa]	RecName: Full=Putative disease resistance protein RGA3; AltName: Full=Blight resistance protein B149; AltName: Full=RGA1-blb;	SubName: Full=NBS-LRR type resistance protein {ECO:0000313|EMBL:ABJ99600.1};	Apoptotic ATPase	GO:0043531,ADP binding; GO:0005524,ATP binding; GO:0006952,defense response	NB-ARC domain
gene-LOC110717861	3.79	5.83	1.84	0.31	0.05	0.13	247	373	118	19	3	8	0.034	-4.892	4.02344e-11	3.56187e-09	down	NW_018745684.1	5194522	5199017	+	LOC110717861	--	K13466 EIX receptor 1/2 | (RefSeq) LRR receptor-like serine/threonine-protein kinase GSO1 (A)	LRR receptor-like serine/threonine-protein kinase FLS2 [Chenopodium quinoa]	RecName: Full=Receptor-like protein EIX2 {ECO:0000305}; AltName: Full=EIX receptor 2 {ECO:0000312|EMBL:AAR28378.1}; Flags: Precursor;	SubName: Full=Uncharacterized protein {ECO:0000313|EMBL:KNA24898.1};	FOG: Leucine rich repeat	GO:0016021,integral component of membrane; GO:0005886,plasma membrane; GO:0050832,defense response to fungus	Leucine rich repeat
gene-LOC110717864	1.04	2.15	0.33	0.09	0.08	0.42	38	77	12	3	3	15	0.133	-2.912	0.00275131	0.0403444	down	NW_018745684.1	3826322	3828376	+	LOC110717864	--	K08139 MFS transporter, SP family, sugar:H+ symporter | (RefSeq) sugar transport protein 1 (A)	hexose carrier protein HEX6-like [Chenopodium quinoa]	RecName: Full=Hexose carrier protein HEX6;	SubName: Full=Major facilitator superfamily protein {ECO:0000313|EMBL:EOY22822.1};	Predicted transporter (major facilitator superfamily)	GO:0016021,integral component of membrane; GO:0015293,symporter activity; GO:0008643,carbohydrate transport	Sugar (and other) transporter
gene-LOC110717872	7.37	5.22	6.97	2.35	4.68	3.32	259	180	241	77	160	113	0.441	-1.181	0.000104255	0.00265818	down	NW_018745684.1	7335745	7362022	+	LOC110717872	--	K16296 serine carboxypeptidase-like clade I [EC:3.4.16.-] | (RefSeq) serine carboxypeptidase-like 16 isoform X1 (A)	serine carboxypeptidase-like 16 isoform X1 [Chenopodium quinoa]	RecName: Full=Serine carboxypeptidase-like 18; EC=3.4.16.-; Flags: Precursor;	SubName: Full=Uncharacterized protein {ECO:0000313|EMBL:KNA20254.1}; Flags: Fragment;	Serine carboxypeptidases (lysosomal cathepsin A)	GO:0005576,extracellular region; GO:0004180,carboxypeptidase activity; GO:0016747,transferase activity, transferring acyl groups other than amino-acyl groups; GO:0019748,secondary metabolic process	Serine carboxypeptidase
gene-LOC110717948	16.5	15.32	14.74	9.44	10.44	5.61	422	385	371	225	260	139	0.448	-1.16	0.000174616	0.00412097	down	NW_018745684.1	3797177	3800109	+	LOC110717948	--	--	uncharacterized protein LOC110717948 [Chenopodium quinoa]	--	SubName: Full=Uncharacterized protein {ECO:0000313|EMBL:KNA17832.1};	--	--	--
gene-LOC110717951	0.95	2.14	0.39	0.04	0.09	0.43	52	115	21	2	5	23	0.128	-2.963	0.0025255	0.0378348	down	NW_018745684.1	8668614	8672664	+	LOC110717951	--	K05391 cyclic nucleotide gated channel, plant | (RefSeq) cyclic nucleotide-gated ion channel 1-like (A)	putative wall-associated receptor kinase-like 16 [Chenopodium quinoa]	RecName: Full=Wall-associated receptor kinase 1; EC=2.7.11.-; Flags: Precursor;	SubName: Full=Uncharacterized protein {ECO:0000313|EMBL:KMS95257.1}; Flags: Fragment;	--	GO:0016021,integral component of membrane; GO:0009505,plant-type cell wall; GO:0005886,plasma membrane; GO:0005773,vacuole; GO:0005524,ATP binding; GO:0005509,calcium ion binding; GO:0016301,kinase activity; GO:0030247,polysaccharide binding; GO:0004674,protein serine/threonine kinase activity; GO:0050832,defense response to fungus; GO:0009751,response to salicylic acid; GO:0009615,response to vi…	Protein kinase domain
gene-LOC110717971	0.44	0.55	0.78	0	0	0	4	5	7	0	0	0	0.03	-5.042	0.00325392	0.0456401	down	NW_018745684.1	4890583	4891157	+	LOC110717971	--	K00472 prolyl 4-hydroxylase [EC:1.14.11.2] | (RefSeq) probable prolyl 4-hydroxylase 3 (A)	probable prolyl 4-hydroxylase 3 [Chenopodium quinoa]	RecName: Full=Probable prolyl 4-hydroxylase 10 {ECO:0000305}; Short=AtP4H10 {ECO:0000303|Ref.3}; EC=1.14.11.2 {ECO:0000305};	SubName: Full=Uncharacterized protein {ECO:0000313|EMBL:KNA12948.1};	Prolyl 4-hydroxylase alpha subunit	GO:0005789,endoplasmic reticulum membrane; GO:0016021,integral component of membrane; GO:0005506,iron ion binding; GO:0031418,L-ascorbic acid binding; GO:0004656,procollagen-proline 4-dioxygenase activity	2OG-Fe(II) oxygenase superfamily
gene-LOC110718000	3.35	3.26	1.74	0.64	1.22	0.61	45	43	23	8	16	8	0.235	-2.091	0.000524591	0.0106208	down	NW_018745684.1	6469180	6469851	+	LOC110718000	--	--	uncharacterized protein LOC110718000 [Chenopodium quinoa]	--	SubName: Full=Uncharacterized protein {ECO:0000313|EMBL:KNA21669.1};	--	GO:0016021,integral component of membrane	--
gene-LOC110718071	5.05	3.05	5.51	1.47	1.84	1.74	96	57	103	26	34	32	0.317	-1.656	5.44672e-07	2.41374e-05	down	NW_018742455.1	425147	427161	-	LOC110718071	--	K14972 PAX-interacting protein 1 | (RefSeq) mediator of RNA polymerase II transcription subunit 15a-like isoform X1 (A)	mediator of RNA polymerase II transcription subunit 15a-like [Chenopodium quinoa]	RecName: Full=Mediator of RNA polymerase II transcription subunit 15a;	SubName: Full=Uncharacterized protein {ECO:0000313|EMBL:KDP37022.1};	--	GO:0016592,mediator complex; GO:0005634,nucleus; GO:0031490,chromatin DNA binding; GO:0003713,transcription coactivator activity; GO:0045723,positive regulation of fatty acid biosynthetic process; GO:0006355,regulation of transcription, DNA-templated; GO:0009751,response to salicylic acid; GO:0006351,transcription, DNA-templated	KIX domain
gene-LOC110718088	1.2	2.51	0.58	0.02	0.02	0.04	59	121	28	1	1	2	0.015	-6.037	3.59668e-09	2.30496e-07	down	NW_018745684.1	4879161	4881617	-	LOC110718088	--	K13466 EIX receptor 1/2 | (RefSeq) LRR receptor-like serine/threonine-protein kinase GSO1 (A)	LRR receptor-like serine/threonine-protein kinase GSO1 [Chenopodium quinoa]	RecName: Full=Receptor-like protein EIX2 {ECO:0000305}; AltName: Full=EIX receptor 2 {ECO:0000312|EMBL:AAR28378.1}; Flags: Precursor;	SubName: Full=Uncharacterized protein {ECO:0000313|EMBL:KNA24898.1};	FOG: Leucine rich repeat	GO:0016021,integral component of membrane; GO:0005886,plasma membrane; GO:0050832,defense response to fungus	Leucine rich repeat
gene-LOC110718093	8.86	22.83	3.11	1.86	2.55	2.61	200	506	69	39	56	57	0.151	-2.73	0.000163177	0.0038969	down	NW_018745684.1	5330581	5331709	+	LOC110718093	--	K01183 chitinase [EC:3.2.1.14] | (RefSeq) acidic endochitinase SE2-like (A)	acidic endochitinase SE2-like [Chenopodium quinoa]	RecName: Full=Acidic endochitinase SE2; EC=3.2.1.14; Flags: Precursor;	SubName: Full=Uncharacterized protein {ECO:0000313|EMBL:KMT16484.1};	Chitinase	GO:0005615,extracellular space; GO:0004568,chitinase activity; GO:0006032,chitin catabolic process; GO:0000272,polysaccharide catabolic process	Glycosyl hydrolases family 18
gene-LOC110718128	2.04	2.21	3.56	0	0	0	32	34	55	0	0	0	0.004	-7.949	4.51038e-10	3.42708e-08	down	NW_018745684.1	6823480	6826594	+	LOC110718128	--	--	--	--	--	--	--	--
gene-LOC110718129	0.37	0.56	0.09	0.02	0	0.09	25	38	6	1	0	6	0.083	-3.588	0.0032813	0.0459395	down	NW_018745684.1	4821173	4824704	-	LOC110718129	--	K13466 EIX receptor 1/2 | (RefSeq) LRR receptor-like serine/threonine-protein kinase GSO1 (A)	LRR receptor-like serine/threonine-protein kinase GSO1 [Chenopodium quinoa]	RecName: Full=Receptor-like protein EIX2 {ECO:0000305}; AltName: Full=EIX receptor 2 {ECO:0000312|EMBL:AAR28378.1}; Flags: Precursor;	SubName: Full=Uncharacterized protein {ECO:0000313|EMBL:KNA24898.1};	FOG: Leucine rich repeat	GO:0016021,integral component of membrane; GO:0005886,plasma membrane; GO:0050832,defense response to fungus	Leucine rich repeat
gene-LOC110718167	10.82	18.02	10.03	5.77	6.82	6.32	318	520	290	158	195	180	0.389	-1.364	0.000699202	0.0134836	down	NW_018742455.1	677608	679077	+	LOC110718167	--	K14493 gibberellin receptor GID1 [EC:3.-.-.-] | (RefSeq) GID1b-2; hypothetical protein (A)	probable carboxylesterase 6 [Chenopodium quinoa]	RecName: Full=Probable carboxylesterase 6; AltName: Full=AtCXE6; EC=3.1.1.1;	SubName: Full=Uncharacterized protein {ECO:0000313|EMBL:KNA03616.1};	Arylacetamide deacetylase	GO:0052689,carboxylic ester hydrolase activity; GO:0016787,hydrolase activity; GO:0009056,catabolic process	alpha/beta hydrolase fold
gene-LOC110718251	4.07	5.21	6.89	0.07	0.08	0.03	260	327	433	4	5	2	0.009	-6.735	6.0225e-38	1.04208e-34	down	NW_018745684.1	3602719	3632604	-	LOC110718251	--	K13466 EIX receptor 1/2 | (RefSeq) receptor-like protein EIX2 isoform X1 (A)	receptor-like protein 12 isoform X1 [Chenopodium quinoa]	RecName: Full=Receptor-like protein 19 {ECO:0000303|PubMed:18434605}; Short=AtRLP19 {ECO:0000303|PubMed:18434605}; Flags: Precursor;	SubName: Full=Uncharacterized protein {ECO:0000313|EMBL:KNA15783.1};	FOG: Leucine rich repeat	GO:0016021,integral component of membrane	Leucine rich repeat
gene-LOC110718254	8.33	8.03	8.91	0.34	0	0	209	198	220	8	0	0	0.012	-6.436	6.86293e-05	0.00186076	down	NW_018745684.1	3629460	3631036	-	LOC110718254	--	K19613 leucine-rich repeat protein SHOC2 | (RefSeq) receptor-like protein 18 (A)	receptor-like protein 12 [Chenopodium quinoa]	RecName: Full=Receptor like protein 7 {ECO:0000303|PubMed:18434605}; Short=AtRLP7 {ECO:0000303|PubMed:18434605}; Flags: Precursor;	SubName: Full=Uncharacterized protein {ECO:0000313|EMBL:KNA15783.1};	FOG: Leucine rich repeat	GO:0016021,integral component of membrane	Leucine Rich Repeat
gene-LOC110718256	5.54	4.13	9.79	0	0	0	127	93	221	0	0	0	0.001	-9.781	2.21364e-15	3.51111e-13	down	NW_018745684.1	3626785	3628229	+	LOC110718256	--	--	--	--	--	--	--	--
gene-LOC110718312	21.98	40.31	4.25	6.75	1.89	7.11	836	1506	159	239	70	262	0.183	-2.446	0.00283726	0.0411765	down	NW_018745684.1	2510215	2512195	+	LOC110718312	--	--	--	--	--	--	--	--
gene-LOC110718380	0.79	1.4	0.75	0.41	0.28	0.43	60	105	56	29	21	32	0.31	-1.689	0.0012154	0.0210495	down	NW_018742455.1	1873192	1878516	+	LOC110718380	--	K15078 structure-specific endonuclease subunit SLX1 [EC:3.6.1.-] | (RefSeq) putative disease resistance protein RGA1 (A)	putative disease resistance protein At3g14460 [Chenopodium quinoa]	RecName: Full=Putative disease resistance RPP13-like protein 1;	SubName: Full=Uncharacterized protein {ECO:0000313|EMBL:KNA15518.1};	Apoptotic ATPase	GO:0005886,plasma membrane; GO:0043531,ADP binding; GO:0005524,ATP binding; GO:0009626,plant-type hypersensitive response; GO:0007165,signal transduction	NB-ARC domain
gene-LOC110718425	5.49	4.95	9.36	0	0	0	87	77	146	0	0	0	0.002	-9.293	4.25409e-14	5.62294e-12	down	NW_018742461.1	456774	459130	-	LOC110718425	--	K11667 INO80 complex subunit C | (RefSeq) INO80 complex subunit C-like (A)	INO80 complex subunit C-like [Chenopodium quinoa]	--	SubName: Full=Uncharacterized protein {ECO:0000313|EMBL:GAY46031.1};	Uncharacterized conserved protein	--	YL1 nuclear protein C-terminal domain
gene-LOC110718429	0.29	0.62	0.25	0	0	0	8	17	7	0	0	0	0.014	-6.155	9.29299e-05	0.00241143	down	NW_018742461.1	1368811	1370768	-	LOC110718429	--	--	uncharacterized protein LOC110718429 [Chenopodium quinoa]	--	SubName: Full=uncharacterized protein LOC107926635 {ECO:0000313|RefSeq:XP_016713019.1, ECO:0000313|RefSeq:XP_016713020.1};	--	GO:0030247,polysaccharide binding	Wall-associated receptor kinase galacturonan-binding
gene-LOC110718466	28.41	23.02	28.43	13.37	16.05	13.53	260	207	256	114	143	120	0.451	-1.149	2.59892e-07	1.21689e-05	down	NW_018742204.1	11527484	11529758	-	LOC110718466	--	--	--	--	--	--	--	--
gene-LOC110718467	0.79	0.48	1.15	0.4	0.22	0.34	60	36	86	28	16	25	0.347	-1.526	0.000528423	0.0106713	down	NW_018742461.1	92432	97436	-	LOC110718467	--	K15078 structure-specific endonuclease subunit SLX1 [EC:3.6.1.-] | (RefSeq) putative disease resistance protein RGA1 (A)	putative disease resistance protein RGA4 isoform X1 [Chenopodium quinoa]	RecName: Full=Putative disease resistance protein RGA4; AltName: Full=RGA4-blb;	SubName: Full=NBS-LRR type resistance protein {ECO:0000313|EMBL:ABJ99599.1};	Apoptotic ATPase	GO:0043531,ADP binding; GO:0005524,ATP binding; GO:0006952,defense response	NB-ARC domain
gene-LOC110718518	1.43	1.32	2.36	0.9	1.28	0.74	56	51	91	33	49	28	0.489	-1.033	0.00215694	0.0332093	down	NW_018742461.1	592255	597674	-	LOC110718518	--	--	--	--	--	--	--	--
gene-LOC110718557	1.01	1.05	2.53	0	0	0	34	35	84	0	0	0	0.003	-8.244	1.83104e-10	1.47362e-08	down	NW_018742461.1	1140765	1148802	-	LOC110718557	--	--	--	--	--	--	--	--
gene-LOC110718558	27.53	18.52	21.85	8.39	10.95	5.91	976	645	762	277	378	203	0.306	-1.708	6.35619e-09	3.94073e-07	down	NW_018742461.1	1153822	1168242	-	LOC110718558	--	K09264 MADS-box transcription factor, plant | (RefSeq) agamous-like MADS-box protein AGL16 isoform X1 (A)	MADS-box protein AGL24-like isoform X1 [Chenopodium quinoa]	RecName: Full=MADS-box protein AGL24; AltName: Full=Protein AGAMOUS-LIKE 24;	SubName: Full=MADS4 {ECO:0000313|EMBL:APO15554.1};	MADS box transcription factor	GO:0005737,cytoplasm; GO:0005634,nucleus; GO:0003700,DNA-binding transcription factor activity; GO:0046982,protein heterodimerization activity; GO:0000977,RNA polymerase II regulatory region sequence-specific DNA binding; GO:0043565,sequence-specific DNA binding; GO:0030154,cell differentiation; GO:0048438,floral whorl development; GO:0010077,maintenance of inflorescence meristem identity; GO:004…	SRF-type transcription factor (DNA-binding and dimerisation domain)
gene-LOC110718689	4.08	2.75	6.61	1.92	2.93	1.25	192	127	306	84	134	57	0.391	-1.356	0.000120312	0.00299336	down	NW_018742461.1	2293843	2297801	-	LOC110718689	--	K14677 aminoacylase [EC:3.5.1.14] | (RefSeq) aminoacylase-1-like isoform X1 (A)	aminoacylase-1-like isoform X1 [Chenopodium quinoa]	--	SubName: Full=Uncharacterized protein {ECO:0000313|EMBL:KNA12601.1};	Aminoacylase ACY1 and related metalloexopeptidases	GO:0005737,cytoplasm; GO:0004046,aminoacylase activity; GO:0008237,metallopeptidase activity; GO:0006520,cellular amino acid metabolic process	Peptidase family M20/M25/M40
gene-LOC110718703	4.71	6.2	2.49	0.29	0.18	0.46	192	248	100	11	7	18	0.055	-4.178	7.26539e-12	7.16507e-10	down	NW_018742204.1	12307322	12310312	+	LOC110718703	--	K13418 somatic embryogenesis receptor kinase 1 [EC:2.7.10.1 2.7.11.1] | (RefSeq) LRR receptor kinase BAK1-like (A)	LEAF RUST 10 DISEASE-RESISTANCE LOCUS RECEPTOR-LIKE PROTEIN KINASE-like 2.5 [Chenopodium quinoa]	RecName: Full=LEAF RUST 10 DISEASE-RESISTANCE LOCUS RECEPTOR-LIKE PROTEIN KINASE-like 2.5 {ECO:0000303|PubMed:12805585}; EC=2.7.11.1; AltName: Full=Probable receptor-like serine/threonine-protein kinase LRK10L-2.5 {ECO:0000305}; Flags: Precursor;	SubName: Full=Uncharacterized protein {ECO:0000313|EMBL:KNA19548.1};	Serine/threonine protein kinase	GO:0016021,integral component of membrane; GO:0005524,ATP binding; GO:0004674,protein serine/threonine kinase activity	Protein kinase domain
gene-LOC110718718	0.68	0.5	1.34	0	0	0	37	27	72	0	0	0	0.004	-8.074	4.11541e-10	3.15214e-08	down	NW_018742461.1	2707635	2710475	+	LOC110718718	--	--	uncharacterized protein LOC110718718 [Chenopodium quinoa]	--	SubName: Full=Uncharacterized protein {ECO:0000313|EMBL:KZN03945.1};	--	GO:0016021,integral component of membrane; GO:0004970,ionotropic glutamate receptor activity; GO:0006952,defense response	--
gene-LOC110718746	24.92	39.62	20.81	5.41	3.62	9.52	975	1523	801	197	138	361	0.178	-2.491	1.79441e-06	7.14518e-05	down	NW_018742461.1	3056369	3063421	+	LOC110718746	--	K15406 wax-ester synthase / diacylglycerol O-acyltransferase [EC:2.3.1.75 2.3.1.20] | (RefSeq) O-acyltransferase WSD1 (A)	O-acyltransferase WSD1-like [Chenopodium quinoa]	RecName: Full=O-acyltransferase WSD1; AltName: Full=Diacylglycerol O-acyltransferase; Short=DGAT; EC=2.3.1.20; AltName: Full=Long-chain-alcohol O-fatty-acyltransferase; EC=2.3.1.75; AltName: Full=Wax synthase; Short=WS;	SubName: Full=Uncharacterized protein {ECO:0000313|EMBL:CCB56847.1};	--	GO:0005783,endoplasmic reticulum; GO:0005789,endoplasmic reticulum membrane; GO:0016021,integral component of membrane; GO:0005886,plasma membrane; GO:0102966,arachidoyl-CoA:1-dodecanol O-acyltransferase activity; GO:0004144,diacylglycerol O-acyltransferase activity; GO:0047196,long-chain-alcohol O-fatty-acyltransferase activity; GO:0103095,wax ester synthase activity; GO:0019432,triglyceride bio…	Protein of unknown function (DUF1298)
gene-LOC110718899	6.92	3.95	12.91	0	0	0	98	55	180	0	0	0	0.002	-9.351	1.65234e-13	2.0422e-11	down	NW_018742204.1	12869844	12874552	+	LOC110718899	--	--	--	--	--	--	--	--
gene-LOC110719057	0.63	0.57	0.07	0	0.07	0.03	26	23	3	0	3	1	0.059	-4.085	0.00149577	0.0249188	down	NW_018742474.1	9	18225	-	LOC110719057	--	--	--	--	--	--	--	--
gene-LOC110719065	12.25	9.32	12.64	0.13	0.06	0.13	198	148	201	2	1	2	0.008	-6.971	4.61898e-23	2.19788e-20	down	NW_018742476.1	226747	230121	-	LOC110719065	--	--	uncharacterized protein LOC110719065 [Chenopodium quinoa]	--	SubName: Full=Uncharacterized protein {ECO:0000313|EMBL:KNA23774.1};	Uncharacterized conserved protein, contains TBC domain	GO:0016021,integral component of membrane	--
gene-LOC110719109	15.2	16.15	15.31	8.19	10.48	9.25	319	333	316	160	214	188	0.494	-1.018	9.06536e-05	0.0023604	down	NW_018742483.1	957180	959832	+	LOC110719109	--	--	--	--	--	--	--	--
gene-LOC110719143	8.9	4.29	10.1	3.02	5.01	2.32	95	45	106	30	52	24	0.379	-1.4	0.000598695	0.0118639	down	NW_018742204.1	13915671	13916698	-	LOC110719143	--	--	--	--	--	--	--	--
gene-LOC110719175	5.21	4.85	7.09	1.27	3.91	1.71	189	173	253	43	138	60	0.333	-1.588	7.50593e-05	0.0019981	down	NW_018742484.1	4371718	4375849	+	LOC110719175	--	--	--	--	--	--	--	--
gene-LOC110719198	0.32	0.19	0.65	0	0	0	5	3	10	0	0	0	0.028	-5.143	0.00283569	0.0411695	down	NW_018742484.1	5531691	5532476	-	LOC110719198	--	K23280 rhamnogalacturonan I rhamnosyltransferase [EC:2.4.1.351] | (RefSeq) uncharacterized protein LOC101257103 isoform X1 (A)	uncharacterized protein LOC110719198 [Chenopodium quinoa]	--	SubName: Full=uncharacterized protein LOC107791076 {ECO:0000313|RefSeq:XP_016468557.1};	FOG: Transposon-encoded proteins with TYA, reverse transcriptase, integrase domains in various combinations	--	gag-polypeptide of LTR copia-type
gene-LOC110719210	3.61	3.18	1.94	0.04	0	0.13	89	77	47	1	0	3	0.016	-5.98	5.42045e-11	4.70023e-09	down	NW_018742484.1	5835869	5837591	-	LOC110719210	--	K02218 casein kinase 1 [EC:2.7.11.1] | (RefSeq) uncharacterized protein LOC8069780 (A)	protein ALP1-like [Chenopodium quinoa]	RecName: Full=Protein ALP1-like {ECO:0000305}; EC=3.1.-.-;	SubName: Full=Uncharacterized protein {ECO:0000313|EMBL:KNA03300.1};	Predicted transposase	GO:0005634,nucleus; GO:0046872,metal ion binding; GO:0004518,nuclease activity	DDE superfamily endonuclease
gene-LOC110719225	0.7	0.27	0.94	0	0	0	31	12	41	0	0	0	0.006	-7.379	6.0587e-08	3.18119e-06	down	NW_018742484.1	6562227	6577507	+	LOC110719225	--	K14489 arabidopsis histidine kinase 2/3/4 (cytokinin receptor) [EC:2.7.13.3] | (RefSeq) histidine kinase 3-like isoform X1 (A)	histidine kinase CKI1-like [Chenopodium quinoa]	RecName: Full=Histidine kinase CKI1; EC=2.7.13.3; AltName: Full=Protein CYTOKININ-INDEPENDENT 1;	SubName: Full=Uncharacterized protein {ECO:0000313|EMBL:KDP28250.1};	Sensory transduction histidine kinase	GO:0016021,integral component of membrane; GO:0005622,intracellular; GO:0005886,plasma membrane; GO:0009506,plasmodesma; GO:0000155,phosphorelay sensor kinase activity; GO:0004673,protein histidine kinase activity; GO:0042803,protein homodimerization activity; GO:0009736,cytokinin-activated signaling pathway; GO:0009553,embryo sac development; GO:0009116,nucleoside metabolic process; GO:0010087,p…	Histidine kinase-, DNA gyrase B-, and HSP90-like ATPase
gene-LOC110719312	0.41	0.8	0.84	0.27	0.31	0.11	49	94	99	30	36	13	0.278	-1.849	0.000189595	0.00441967	down	NW_018742484.1	462705	471558	+	LOC110719312	--	--	--	--	--	--	--	--
gene-LOC110719315	1.94	2.15	3.77	0	0	0	133	145	255	0	0	0	0.001	-10.077	1.93427e-16	3.57436e-14	down	NW_018742484.1	503193	509869	-	LOC110719315	--	--	uncharacterized protein LOC110719315 isoform X1 [Chenopodium quinoa]	--	SubName: Full=Uncharacterized protein {ECO:0000313|EMBL:KNA08006.1}; Flags: Fragment;	--	--	--
gene-LOC110719357	20.47	7.75	18.3	3.68	3.15	5.05	896	333	788	150	134	214	0.224	-2.159	6.19398e-08	3.24775e-06	down	NW_018742484.1	2012354	2015897	+	LOC110719357	--	K19861 benzyl alcohol O-benzoyltransferase [EC:2.3.1.196 2.3.1.232] | (RefSeq) methanol O-anthraniloyltransferase (A)	methanol O-anthraniloyltransferase-like [Chenopodium quinoa]	RecName: Full=Methanol O-anthraniloyltransferase; EC=2.3.1.232; AltName: Full=Anthraniloyl-CoA:methanol acyltransferase; AltName: Full=Benzyl alcohol O-benzoyltransferase; EC=2.3.1.196;	SubName: Full=Uncharacterized protein {ECO:0000313|EMBL:CCB60353.1};	--	GO:0016747,transferase activity, transferring acyl groups other than amino-acyl groups	Transferase family
gene-LOC110719365	0.27	0.39	0.25	0	0.06	0	10	14	9	0	2	0	0.049	-4.347	0.00136392	0.0231168	down	NW_018742484.1	2205551	2208311	+	LOC110719365	--	K23452 UDP-glucosyltransferase 85A [EC:2.4.1.-] | (RefSeq) UDP-glycosyltransferase 85A2 (A)	7-deoxyloganetic acid glucosyltransferase-like [Chenopodium quinoa]	RecName: Full=7-deoxyloganetic acid glucosyltransferase; EC=2.4.1.323; AltName: Full=UDP-glucose glucosyltransferase 8; Short=CrUGT8; AltName: Full=UDP-glycosyltransferase 709C2;	RecName: Full=Glycosyltransferase {ECO:0000256|RuleBase:RU362057}; EC=2.4.1.- {ECO:0000256|RuleBase:RU362057};	UDP-glucuronosyl and UDP-glucosyl transferase	GO:0102970,7-deoxyloganetic acid glucosyltransferase activity; GO:0035251,UDP-glucosyltransferase activity; GO:1900994,(-)-secologanin biosynthetic process	UDP-glucoronosyl and UDP-glucosyl transferase
gene-LOC110719405	2.07	2.19	2.53	0	0	0	73	76	88	0	0	0	0.002	-8.952	4.55433e-13	5.38416e-11	down	NW_018742484.1	3277739	3280412	-	LOC110719405	--	K08099 chlorophyllase [EC:3.1.1.14] | (RefSeq) chlorophyllase type 0-like (A)	chlorophyllase type 0-like [Chenopodium quinoa]	RecName: Full=Chlorophyllase type 0; EC=3.1.1.14; AltName: Full=CaCLH0; AltName: Full=Chlorophyll-chlorophyllido hydrolase 0; Short=Chlase 0; Flags: Precursor;	SubName: Full=Uncharacterized protein {ECO:0000313|EMBL:KNA19421.1};	--	GO:0047746,chlorophyllase activity; GO:0102293,pheophytinase b activity; GO:0015996,chlorophyll catabolic process	Chlorophyllase
gene-LOC110719406	3.01	2.81	5.52	0.49	0.55	0.29	170	156	307	26	30	16	0.101	-3.302	6.2946e-23	2.95823e-20	down	NW_018742484.1	3286098	3293492	-	LOC110719406	--	--	uncharacterized protein LOC110719406 isoform X1 [Chenopodium quinoa]	--	--	--	--	--
gene-LOC110719475	2.86	5.86	1.43	0.09	0.68	0.04	69	139	34	2	16	1	0.058	-4.114	1.42281e-05	0.000471795	down	NW_018742484.1	4444694	4445902	-	LOC110719475	--	K12173 BRCA1-A complex subunit BRE | (RefSeq) BRCA1-A complex subunit BRE-like (A)	alpha-amylase/trypsin inhibitor-like [Chenopodium quinoa]	RecName: Full=Zeamatin; Flags: Precursor;	SubName: Full=Uncharacterized protein {ECO:0000313|EMBL:KNA04280.1};	--	GO:0050832,defense response to fungus; GO:0031640,killing of cells of other organism; GO:0044130,negative regulation of growth of symbiont in host; GO:0051841,positive regulation by host of cytolysis of symbiont cells	Thaumatin family
gene-LOC110719580	0.17	1.74	0.05	0.03	0	0	7	72	2	1	0	0	0.01	-6.679	0.000213714	0.00490974	down	NW_018742484.1	6489618	6492505	+	LOC110719580	--	K17604 zinc finger SWIM domain-containing protein 3 | (RefSeq) protein FAR1-RELATED SEQUENCE 5-like (A)	PKS-NRPS hybrid synthetase CHGG_01239-like [Chenopodium quinoa]	RecName: Full=Protein FAR1-RELATED SEQUENCE 5;	SubName: Full=Uncharacterized protein {ECO:0000313|EMBL:OMO51093.1};	--	GO:0005634,nucleus; GO:0008270,zinc ion binding; GO:0006355,regulation of transcription, DNA-templated	MULE transposase domain
gene-LOC110719581	5.61	16.84	0.86	0.3	0	0	99	292	15	5	0	0	0.01	-6.68	0.00119024	0.0207079	down	NW_018742484.1	6487462	6489528	+	LOC110719581	--	K12823 ATP-dependent RNA helicase DDX5/DBP2 [EC:3.6.4.13] | (RefSeq) DEAD-box ATP-dependent RNA helicase 40 (A)	heavy metal-associated isoprenylated plant protein 39-like [Chenopodium quinoa]	RecName: Full=Heavy metal-associated isoprenylated plant protein 39 {ECO:0000303|PubMed:21072340, ECO:0000303|PubMed:23368984}; Short=AtHIP39 {ECO:0000303|PubMed:21072340, ECO:0000303|PubMed:23368984}; Flags: Precursor;	SubName: Full=Uncharacterized protein {ECO:0000313|EMBL:KNA20675.1};	Copper chaperone	GO:0005737,cytoplasm; GO:0046914,transition metal ion binding; GO:0046916,cellular transition metal ion homeostasis; GO:0030001,metal ion transport	Heavy-metal-associated domain
gene-LOC110719661	8.91	27.55	1.25	2.19	0.17	1.77	109	331	15	25	2	21	0.084	-3.582	0.00101493	0.018302	down	NW_018742484.1	7564903	7565850	+	LOC110719661	--	--	LOW QUALITY PROTEIN: transcription factor MafB-like [Chenopodium quinoa]	--	SubName: Full=Suaeda glauca salt-induced hydrophilic protein mRNA {ECO:0000313|EMBL:AJK93573.1};	--	--	--
gene-LOC110719698	1.8	2.02	2.05	0.83	0.53	0.64	49	54	55	21	14	17	0.286	-1.807	2.27124e-05	0.000707524	down	NW_018742484.1	7942878	7948115	-	LOC110719698	--	K06268 serine/threonine-protein phosphatase 2B regulatory subunit | (RefSeq) calcineurin B-like protein 7 isoform X1 (A)	calcineurin B-like protein 7 isoform X1 [Chenopodium quinoa]	RecName: Full=Calcineurin B-like protein 7;	SubName: Full=Uncharacterized protein {ECO:0000313|EMBL:PIA34780.1};	Ca2+/calmodulin-dependent protein phosphatase (calcineurin subunit B), EF-Hand superfamily protein	GO:0005886,plasma membrane; GO:0005509,calcium ion binding	EF hand
gene-LOC110719712	0.88	0.57	1.07	0	0.11	0.08	57	36	68	0	7	5	0.065	-3.942	1.86904e-09	1.2615e-07	down	NW_018742484.1	8048088	8055456	-	LOC110719712	--	K10624 E3 ubiquitin-protein ligase RBBP6 [EC:2.3.2.27] | (RefSeq) E3 ubiquitin ligase PQT3-like isoform X1 (A)	uncharacterized protein LOC110719712 [Chenopodium quinoa]	--	SubName: Full=Uncharacterized protein {ECO:0000313|EMBL:KNA10698.1};	--	GO:0005634,nucleus; GO:0003676,nucleic acid binding; GO:0008270,zinc ion binding	--
gene-LOC110719768	3.34	0.26	0.3	0.09	0.13	0.22	79	6	7	2	3	5	0.093	-3.43	0.0027806	0.0406835	down	NW_018742486.1	24311	27382	-	LOC110719768	--	K02731 20S proteasome subunit alpha 4 [EC:3.4.25.1] | (RefSeq) proteasome subunit alpha type-7 (A)	proteasome subunit alpha type-7 [Chenopodium quinoa]	RecName: Full=Proteasome subunit alpha type-7; EC=3.4.25.1; AltName: Full=20S proteasome alpha subunit D; AltName: Full=20S proteasome subunit alpha-4;	RecName: Full=Proteasome subunit alpha type {ECO:0000256|RuleBase:RU000551}; EC=3.4.25.1 {ECO:0000256|RuleBase:RU000551};	20S proteasome, regulatory subunit alpha type PSMA7/PRE6	GO:0005737,cytoplasm; GO:0005634,nucleus; GO:0019773,proteasome core complex, alpha-subunit complex; GO:0004298,threonine-type endopeptidase activity; GO:0006511,ubiquitin-dependent protein catabolic process	Proteasome subunit
gene-LOC110719832	1.18	0.36	1.01	0.19	0.22	0.04	33	10	28	5	6	1	0.149	-2.747	0.000512966	0.0104033	down	NW_018742493.1	88656	92983	-	LOC110719832	--	K11091 U1 small nuclear ribonucleoprotein A | (RefSeq) U1 small nuclear ribonucleoprotein A (A)	uncharacterized protein LOC110719832 isoform X1 [Chenopodium quinoa]	RecName: Full=RNA-binding protein 2 {ECO:0000305};	SubName: Full=Uncharacterized protein {ECO:0000313|EMBL:KNA13750.1};	RNA binding protein (contains RRM repeats)	GO:0003723,RNA binding	RNA recognition motif. (a.k.a. RRM, RBD, or RNP domain)
gene-LOC110719843	7.24	7.02	4.59	1.97	4.23	0.65	253	241	158	64	144	22	0.281	-1.834	0.00232196	0.0352573	down	NW_018742493.1	166722	171543	+	LOC110719843	--	K05350 beta-glucosidase [EC:3.2.1.21] | (RefSeq) beta-glucosidase 44-like (A)	beta-glucosidase 44-like [Chenopodium quinoa]	RecName: Full=Beta-glucosidase 44; Short=AtBGLU44; EC=3.2.1.21; Flags: Precursor;	SubName: Full=Uncharacterized protein {ECO:0000313|EMBL:KNA10671.1};	Beta-glucosidase, lactase phlorizinhydrolase, and related proteins	GO:0005618,cell wall; GO:0022626,cytosolic ribosome; GO:0005576,extracellular region; GO:0009505,plant-type cell wall; GO:0080081,4-methylumbelliferyl-beta-D-glucopyranoside beta-glucosidase activity; GO:0047668,amygdalin beta-glucosidase activity; GO:0080083,beta-gentiobiose beta-glucosidase activity; GO:0008422,beta-glucosidase activity; GO:0004567,beta-mannosidase activity; GO:0080079,cellobio…	Glycosyl hydrolase family 1
gene-LOC110719856	19.29	14.05	19.75	5.18	5.33	4.15	264	189	266	66	71	55	0.233	-2.103	1.22134e-17	2.71887e-15	down	NW_018742493.1	286680	290501	+	LOC110719856	--	--	--	--	--	--	--	--
gene-LOC110719924	1.46	1.8	1.1	0	0	0	19	23	14	0	0	0	0.008	-6.926	8.10427e-07	3.46246e-05	down	NW_018742523.1	4289731	4291240	-	LOC110719924	--	--	--	--	--	--	--	--
gene-LOC110719967	148.6	154.85	98.2	83.74	77.69	81.88	2450	2508	1593	1286	1247	1308	0.49	-1.028	0.00359494	0.0493681	down	NW_018742523.1	1769877	1770701	-	LOC110719967	--	K19035 50S ribosomal protein 6 | (RefSeq) 50S ribosomal protein 6, chloroplastic-like (A)	50S ribosomal protein 6, chloroplastic-like [Chenopodium quinoa]	RecName: Full=50S ribosomal protein 6, chloroplastic {ECO:0000305}; AltName: Full=CL25; AltName: Full=Chloroplastic large ribosomal subunit protein cL38 {ECO:0000303|PubMed:28007896}; AltName: Full=Plastid-specific 50S ribosomal protein 6 {ECO:0000303|PubMed:10874046}; Short=PSRP-6; Flags: Precursor;	SubName: Full=Uncharacterized protein {ECO:0000313|EMBL:KMS99666.1};	--	GO:0009507,chloroplast; GO:0005840,ribosome; GO:0019843,rRNA binding; GO:0003735,structural constituent of ribosome; GO:0006412,translation	Family of unknown function (DUF5323)
gene-LOC110719969	2.13	2.42	1.71	1.12	0.66	1.18	80	89	63	39	24	43	0.391	-1.355	0.00363562	0.0498189	down	NW_018742523.1	1959615	1962217	+	LOC110719969	--	K13260 isoflavone/4'-methoxyisoflavone 2'-hydroxylase [EC:1.14.14.90 1.14.14.89] | (RefSeq) cytochrome P450 81D1-like (A)	isoflavone 3'-hydroxylase-like, partial [Chenopodium quinoa]	RecName: Full=Cytochrome P450 81D1; EC=1.14.-.-;	SubName: Full=Cytochrome P450 81B80 {ECO:0000313|EMBL:BAU59407.1};	Cytochrome P450 CYP2 subfamily	GO:0016021,integral component of membrane; GO:0016020,membrane; GO:0020037,heme binding; GO:0005506,iron ion binding; GO:0016709,oxidoreductase activity, acting on paired donors, with incorporation or reduction of molecular oxygen, NAD(P)H as one donor, and incorporation of one atom of oxygen; GO:0098542,defense response to other organism; GO:0042343,indole glucosinolate metabolic process; GO:004…	Cytochrome P450
gene-LOC110719988	1.21	1.63	0.99	0.02	0.01	0	85	112	68	1	1	0	0.006	-7.326	1.14811e-10	9.6055e-09	down	NW_018742523.1	2508743	2531040	-	LOC110719988	--	--	--	--	--	--	--	--
gene-LOC110720094	0.96	0.89	0.84	0.51	0.29	0.12	58	53	50	29	17	7	0.282	-1.825	0.0012537	0.0216144	down	NW_018742204.1	16267227	16283139	+	LOC110720094	--	--	--	--	--	--	--	--
gene-LOC110720101	0.32	2.03	0	0.03	0	0.06	12	74	0	1	0	2	0.027	-5.231	0.00265466	0.0392904	down	NW_018742541.1	312655	316585	+	LOC110720101	--	K15803 (-)-germacrene D synthase [EC:4.2.3.75] | (RefSeq) sesquiterpene synthase-like (A)	probable sesquiterpene synthase [Chenopodium quinoa]	RecName: Full=Probable sesquiterpene synthase; Short=SmSTPS; EC=4.2.3.-;	SubName: Full=Sesquiterpene synthase {ECO:0000313|EMBL:BAM24405.1};	--	GO:0000287,magnesium ion binding; GO:0010333,terpene synthase activity; GO:0008152,metabolic process	Terpene synthase family, metal binding domain
gene-LOC110720139	2.75	1.42	3.29	0	0	0	152	77	179	0	0	0	0.001	-9.684	5.83125e-15	8.6038e-13	down	NW_018742541.1	1261726	1265459	+	LOC110720139	--	K05349 beta-glucosidase [EC:3.2.1.21] | (RefSeq) probable beta-glucosidase F (A)	uncharacterized protein LOC110720139 isoform X1 [Chenopodium quinoa]	--	SubName: Full=Uncharacterized protein {ECO:0000313|EMBL:KNA09889.1};	--	GO:0005524,ATP binding	--
gene-LOC110720205	0.28	0.28	0.79	0	0	0	5	5	14	0	0	0	0.021	-5.559	0.000605372	0.0119713	down	NW_018742541.1	1010685	1011584	+	LOC110720205	--	K10401 kinesin family member 18/19 | (RefSeq) uncharacterized protein LOC113463215 (A)	uncharacterized protein LOC110720205 [Chenopodium quinoa]	--	SubName: Full=Uncharacterized protein {ECO:0000313|EMBL:CCA65980.1};	FOG: Reverse transcriptase	--	Domain of unknown function (DUF4283)
gene-LOC110720206	0.53	0.81	1.29	0	0	0.14	8	12	19	0	0	2	0.046	-4.435	0.00071456	0.0137033	down	NW_018742541.1	1014191	1014940	+	LOC110720206	--	K10393 kinesin family member 2/24 | (RefSeq) kinesin-13A-like (A)	uncharacterized protein LOC110720206 [Chenopodium quinoa]	--	SubName: Full=Uncharacterized protein {ECO:0000313|EMBL:CCA65981.1};	FOG: Reverse transcriptase	--	zinc-binding in reverse transcriptase
gene-LOC110720249	7.77	8.95	7.92	4.03	3.64	5.5	296	335	297	143	135	203	0.446	-1.165	0.000629891	0.0123442	down	NW_018742204.1	16757245	16764900	-	LOC110720249	--	K15889 prenylcysteine alpha-carboxyl methylesterase [EC:3.1.1.-] | (RefSeq) probable isoprenylcysteine alpha-carbonyl methylesterase ICMEL1 (A)	probable isoprenylcysteine alpha-carbonyl methylesterase ICMEL1 [Chenopodium quinoa]	RecName: Full=Probable isoprenylcysteine alpha-carbonyl methylesterase ICMEL1; EC=3.1.1.n2; AltName: Full=Isoprenylcysteine methylesterase-like protein 1;	SubName: Full=Uncharacterized protein {ECO:0000313|EMBL:KNA07213.1};	Carboxylesterase and related proteins	GO:0005789,endoplasmic reticulum membrane; GO:0000139,Golgi membrane; GO:0016021,integral component of membrane; GO:0010296,prenylcysteine methylesterase activity; GO:0009056,catabolic process; GO:0009737,response to abscisic acid	alpha/beta hydrolase fold
gene-LOC110720300	38.73	50.94	34.02	21.22	30.39	22.76	339	438	293	173	259	193	0.483	-1.051	0.00267743	0.0395103	down	NW_018742556.1	568976	569413	-	LOC110720300	--	--	--	--	--	--	--	--
gene-LOC110720518	1.08	2.19	1.32	0.53	0.69	0.19	24	48	29	11	15	4	0.242	-2.046	0.00191789	0.0303568	down	NW_018742204.1	17096814	17097929	-	LOC110720518	--	K13448 calcium-binding protein CML | (RefSeq) probable calcium-binding protein CML15 (A)	probable calcium-binding protein CML15 [Chenopodium quinoa]	RecName: Full=Probable calcium-binding protein CML15; AltName: Full=Calmodulin-like protein 15;	SubName: Full=Uncharacterized protein {ECO:0000313|EMBL:KNA05832.1};	Calmodulin and related proteins (EF-Hand superfamily)	GO:0005509,calcium ion binding	EF hand
gene-LOC110720758	1.22	0.47	0.97	0.12	0.31	0.08	32	12	25	3	8	2	0.162	-2.623	0.00043527	0.00902965	down	NW_018742577.1	2643250	2646005	-	LOC110720758	--	--	--	--	--	--	--	--
gene-LOC110720759	10.41	29.24	0.76	0.63	0.09	0.43	125	345	9	7	1	5	0.021	-5.562	9.37547e-07	3.98321e-05	down	NW_018742577.1	2884655	2885255	+	LOC110720759	--	K03676 glutaredoxin 3 | (RefSeq) monothiol glutaredoxin-S6-like (A)	monothiol glutaredoxin-S6-like [Chenopodium quinoa]	RecName: Full=Monothiol glutaredoxin-S6; Short=AtGrxS6; AltName: Full=Protein ROXY 17;	SubName: Full=Uncharacterized protein {ECO:0000313|EMBL:KNA07592.1};	Glutaredoxin and related proteins	GO:0005737,cytoplasm; GO:0051537,2 iron, 2 sulfur cluster binding; GO:0009055,electron transfer activity; GO:0046872,metal ion binding; GO:0015035,protein disulfide oxidoreductase activity; GO:0045454,cell redox homeostasis	Glutaredoxin
gene-LOC110720843	2.17	2.04	2.35	1.11	0.73	1.45	134	124	143	64	44	87	0.429	-1.221	0.00143251	0.0240368	down	NW_018742577.1	551339	556726	-	LOC110720843	--	K05387 glutamate receptor, ionotropic, plant | (RefSeq) glutamate receptor 2.7-like (A)	glutamate receptor 2.7-like [Chenopodium quinoa]	RecName: Full=Glutamate receptor 2.8; AltName: Full=Ligand-gated ion channel 2.8; Flags: Precursor;	SubName: Full=Uncharacterized protein {ECO:0000313|EMBL:KNA12477.1};	Glutamate-gated kainate-type ion channel receptor subunit GluR5 and related subunits	GO:0016021,integral component of membrane; GO:0005622,intracellular; GO:0005886,plasma membrane; GO:0005262,calcium channel activity; GO:0008066,glutamate receptor activity; GO:0004970,ionotropic glutamate receptor activity; GO:0006816,calcium ion transport; GO:0019722,calcium-mediated signaling; GO:0071230,cellular response to amino acid stimulus	Receptor family ligand binding region
gene-LOC110720867	0.82	1.27	1.02	0.1	0.09	0.07	36	55	44	4	4	3	0.069	-3.86	1.7524e-09	1.18488e-07	down	NW_018742577.1	970317	975181	+	LOC110720867	--	K10523 speckle-type POZ protein | (RefSeq) protein synthesis inhibitor II-like (A)	60 kDa jasmonate-induced protein-like [Chenopodium quinoa]	RecName: Full=60 kDa jasmonate-induced protein; EC=3.2.2.22; AltName: Full=rRNA N-glycosidase;	RecName: Full=rRNA N-glycosidase {ECO:0000256|RuleBase:RU004915}; EC=3.2.2.22 {ECO:0000256|RuleBase:RU004915};	--	GO:0030598,rRNA N-glycosylase activity; GO:0090729,toxin activity; GO:0006952,defense response; GO:0017148,negative regulation of translation	Ribosome inactivating protein
gene-LOC110720941	1.93	2.19	1.24	0.95	0.72	0.88	116	129	73	53	42	51	0.384	-1.379	0.00215743	0.0332093	down	NW_018742577.1	2259839	2262842	+	LOC110720941	--	K13430 serine/threonine-protein kinase PBS1 [EC:2.7.11.1] | (RefSeq) serine/threonine-protein kinase CDL1-like (A)	G-type lectin S-receptor-like serine/threonine-protein kinase At2g19130 [Chenopodium quinoa]	RecName: Full=G-type lectin S-receptor-like serine/threonine-protein kinase At2g19130; EC=2.7.11.1; Flags: Precursor;	SubName: Full=Uncharacterized protein {ECO:0000313|EMBL:CAN81803.1};	--	GO:0016021,integral component of membrane; GO:0005886,plasma membrane; GO:0005524,ATP binding; GO:0005516,calmodulin binding; GO:0030246,carbohydrate binding; GO:0004674,protein serine/threonine kinase activity; GO:0006468,protein phosphorylation; GO:0048544,recognition of pollen	Protein kinase domain
gene-LOC110720942	1.8	1.87	0.78	0	0.04	0	98	100	42	0	2	0	0.007	-7.23	2.01452e-09	1.35012e-07	down	NW_018742577.1	2264389	2267112	+	LOC110720942	--	K13416 brassinosteroid insensitive 1-associated receptor kinase 1 [EC:2.7.10.1 2.7.11.1] | (RefSeq) BRASSINOSTEROID INSENSITIVE 1-associated receptor kinase 1-like (A)	G-type lectin S-receptor-like serine/threonine-protein kinase At2g19130 [Chenopodium quinoa]	RecName: Full=G-type lectin S-receptor-like serine/threonine-protein kinase At2g19130; EC=2.7.11.1; Flags: Precursor;	SubName: Full=Uncharacterized protein {ECO:0000313|EMBL:CAN81803.1};	--	GO:0016021,integral component of membrane; GO:0005886,plasma membrane; GO:0005524,ATP binding; GO:0005516,calmodulin binding; GO:0030246,carbohydrate binding; GO:0004674,protein serine/threonine kinase activity; GO:0006468,protein phosphorylation; GO:0048544,recognition of pollen	Protein kinase domain
gene-LOC110721015	1.03	0.74	1.3	0.11	0.05	0.09	61	43	76	6	3	5	0.069	-3.85	6.31457e-13	7.30628e-11	down	NW_018742577.1	3597926	3607204	+	LOC110721015	--	--	uncharacterized protein LOC110721015 [Chenopodium quinoa]	--	SubName: Full=Uncharacterized protein {ECO:0000313|EMBL:KNA15484.1};	--	--	--
gene-LOC110721024	6.65	4.14	5.73	0.55	0.7	0.52	157	96	133	12	16	12	0.09	-3.477	1.68404e-19	5.34221e-17	down	NW_018742204.1	18444838	18447231	+	LOC110721024	--	--	--	--	--	--	--	--
gene-LOC110721189	1.82	3.12	1.07	0	0.05	0	38	64	22	0	1	0	0.007	-7.162	2.26811e-07	1.07656e-05	down	NW_018742607.1	1971218	1973338	-	LOC110721189	--	K00030 isocitrate dehydrogenase (NAD+) [EC:1.1.1.41] | (RefSeq) isocitrate dehydrogenase [NAD] catalytic subunit 5, mitochondrial-like (A)	isocitrate dehydrogenase [NAD]	RecName: Full=Isocitrate dehydrogenase [NAD] catalytic subunit 6, mitochondrial; EC=1.1.1.41; AltName: Full=IDH-VI; AltName: Full=Isocitric dehydrogenase 6; AltName: Full=NAD(+)-specific ICDH 6; Flags: Precursor;	RecName: Full=Isocitrate dehydrogenase [NAD] subunit, mitochondrial {ECO:0000256|RuleBase:RU361266};	Isocitrate dehydrogenase, alpha subunit	GO:0005739,mitochondrion; GO:0004449,isocitrate dehydrogenase (NAD+) activity; GO:0000287,magnesium ion binding; GO:0051287,NAD binding; GO:0006102,isocitrate metabolic process; GO:0006099,tricarboxylic acid cycle	--
gene-LOC110721329	0.92	0.15	1.72	0.1	0.15	0	19	3	35	2	3	0	0.082	-3.61	0.00180092	0.0290983	down	NW_018742616.1	438482	439651	+	LOC110721329	--	--	uncharacterized protein LOC110721329 [Chenopodium quinoa]	--	SubName: Full=Uncharacterized protein {ECO:0000313|EMBL:KNA19245.1};	--	--	Protein of unknown function (DUF1442)
gene-LOC110721367	5.24	6.2	4.02	0.79	0.96	1.44	135	157	102	19	24	36	0.168	-2.57	2.74464e-08	1.54786e-06	down	NW_018742616.1	3542429	3543718	+	LOC110721367	--	K13420 LRR receptor-like serine/threonine-protein kinase FLS2 [EC:2.7.11.1] | (RefSeq) LRR receptor-like serine/threonine-protein kinase FLS2 (A)	G-type lectin S-receptor-like serine/threonine-protein kinase LECRK3 [Chenopodium quinoa]	RecName: Full=G-type lectin S-receptor-like serine/threonine-protein kinase LECRK3 {ECO:0000305}; Short=OsLecRK3 {ECO:0000303|PubMed:25485617}; EC=2.7.11.1 {ECO:0000305}; AltName: Full=OsRLCK135 {ECO:0000303|PubMed:19825577}; Flags: Precursor;	SubName: Full=Uncharacterized protein {ECO:0000313|EMBL:KNA13976.1};	--	GO:0016021,integral component of membrane; GO:0005886,plasma membrane; GO:0005524,ATP binding; GO:0030246,carbohydrate binding; GO:0004674,protein serine/threonine kinase activity; GO:0006952,defense response; GO:0006468,protein phosphorylation	D-mannose binding lectin
gene-LOC110721446	7.25	5.03	7.25	2.29	2.01	0.9	248	169	244	73	67	30	0.224	-2.162	5.55323e-09	3.48836e-07	down	NW_018742616.1	526744	534729	-	LOC110721446	--	K01409 N6-L-threonylcarbamoyladenine synthase [EC:2.3.1.234] | (RefSeq) probable tRNA N6-adenosine threonylcarbamoyltransferase, mitochondrial (A)	probable tRNA N6-adenosine threonylcarbamoyltransferase, mitochondrial [Chenopodium quinoa]	RecName: Full=Probable tRNA N6-adenosine threonylcarbamoyltransferase, mitochondrial {ECO:0000255|HAMAP-Rule:MF_03179}; EC=2.3.1.234 {ECO:0000255|HAMAP-Rule:MF_03179}; AltName: Full=Glycoprotease 1 {ECO:0000255|HAMAP-Rule:MF_03179}; AltName: Full=N6-L-threonylcarbamoyladenine synthase {ECO:0000255|HAMAP-Rule:MF_03179}; Short=t(6)A synthase {ECO:0000255|HAMAP-Rule:MF_03179}; AltName: Full=t(6)A37 …	RecName: Full=Probable tRNA N6-adenosine threonylcarbamoyltransferase, mitochondrial {ECO:0000256|HAMAP-Rule:MF_03179}; EC=2.3.1.234 {ECO:0000256|HAMAP-Rule:MF_03179}; AltName: Full=Glycoprotease 1 {ECO:0000256|HAMAP-Rule:MF_03179}; AltName: Full=N6-L-threonylcarbamoyladenine synthase {ECO:0000256|HAMAP-Rule:MF_03179}; AltName: Full=t(6)A37 threonylcarbamoyladenosine biosynthesis protein GCP1 {EC…	Predicted metalloprotease with chaperone activity (RNAse H/HSP70 fold)	GO:0000408,EKC/KEOPS complex; GO:0005743,mitochondrial inner membrane; GO:0046872,metal ion binding; GO:0004222,metalloendopeptidase activity; GO:0061711,N(6)-L-threonylcarbamoyladenine synthase activity; GO:0009793,embryo development ending in seed dormancy; GO:0002949,tRNA threonylcarbamoyladenosine modification	Glycoprotease family
gene-LOC110721468	2.7	3.75	3.61	1.64	2.06	1.45	140	191	184	79	104	73	0.422	-1.243	4.16665e-05	0.00120893	down	NW_018742616.1	721315	723908	+	LOC110721468	--	K06636 structural maintenance of chromosome 1 | (RefSeq) structural maintenance of chromosomes protein 2-2-like (A)	protein GRAVITROPIC IN THE LIGHT 1-like [Chenopodium quinoa]	RecName: Full=Protein GRAVITROPIC IN THE LIGHT 1 {ECO:0000303|PubMed:16640600};	SubName: Full=Uncharacterized protein {ECO:0000313|EMBL:KNA08623.1};	--	GO:0009959,negative gravitropism; GO:0009639,response to red or far red light	Plant protein of unknown function (DUF641)
gene-LOC110721509	8.11	10.29	4.58	2.42	1.89	4.54	216	269	120	60	49	117	0.312	-1.68	0.00255974	0.0382875	down	NW_018742616.1	1225072	1238791	-	LOC110721509	--	K00344 NADPH2:quinone reductase [EC:1.6.5.5] | (RefSeq) quinone oxidoreductase (A)	uncharacterized protein LOC110721509 [Chenopodium quinoa]	--	SubName: Full=Uncharacterized protein {ECO:0000313|EMBL:KNA05907.1};	Predicted phosphoglycerate mutase	--	Histidine phosphatase superfamily (branch 1)
gene-LOC110721528	1.49	1.1	1.07	0.2	0.29	0.26	48	35	34	6	9	8	0.168	-2.577	1.24212e-06	5.15075e-05	down	NW_018742204.1	19304265	19306930	+	LOC110721528	--	--	uncharacterized protein LOC110721528 [Chenopodium quinoa]	--	SubName: Full=Uncharacterized protein {ECO:0000313|EMBL:KNA05827.1};	--	GO:0003676,nucleic acid binding	Reverse transcriptase-like
gene-LOC110721534	4.31	5.33	6.55	2.75	3.36	2.01	153	186	229	91	116	69	0.419	-1.255	6.65373e-06	0.000236276	down	NW_018742616.1	1513688	1522023	-	LOC110721534	--	K15451 tRNA wybutosine-synthesizing protein 4 [EC:2.1.1.290 2.3.1.231] | (RefSeq) tRNA wybutosine-synthesizing protein 4-like (A)	tRNA wybutosine-synthesizing protein 4-like [Chenopodium quinoa]	RecName: Full=Leucine carboxyl methyltransferase 1 homolog {ECO:0000305}; EC=2.1.1.233 {ECO:0000269|PubMed:21558554}; AltName: Full=Protein SUPPRESSOR OF BRI1 {ECO:0000303|PubMed:21558554}; AltName: Full=[Phosphatase 2A protein]-leucine-carboxy methyltransferase 1 {ECO:0000305};	SubName: Full=Uncharacterized protein {ECO:0000313|EMBL:KNA11740.1};	Carboxymethyl transferase	GO:0005829,cytosol; GO:0008757,S-adenosylmethionine-dependent methyltransferase activity; GO:0032259,methylation	Leucine carboxyl methyltransferase
gene-LOC110721557	1.33	1.73	1	0.03	0.03	0.16	43	55	32	1	1	5	0.045	-4.465	5.40552e-08	2.87778e-06	down	NW_018742204.1	19345876	19348548	+	LOC110721557	--	--	uncharacterized protein LOC110721528 [Chenopodium quinoa]	--	SubName: Full=Uncharacterized protein {ECO:0000313|EMBL:KNA05827.1};	--	GO:0003676,nucleic acid binding	Reverse transcriptase-like
gene-LOC110721574	1.79	1.78	1.32	0.36	0.65	0.61	48	47	35	9	17	16	0.271	-1.883	0.000179799	0.00422234	down	NW_018742204.1	19380194	19381650	-	LOC110721574	--	--	--	--	--	--	--	--
gene-LOC110721612	9.61	6.98	15.51	0.24	0.21	0.06	919	656	1459	21	20	6	0.014	-6.171	2.28681e-54	1.45087e-50	down	NW_018742616.1	2381309	2387385	+	LOC110721612	--	--	--	--	--	--	--	--
gene-LOC110721638	1.06	0.61	1.28	0.31	0.43	0.3	48	27	57	13	19	13	0.302	-1.729	5.90609e-05	0.00163511	down	NW_018742616.1	2953812	2961737	-	LOC110721638	--	K01176 alpha-amylase [EC:3.2.1.1] | (RefSeq) probable alpha-amylase 2 isoform X1 (A)	probable alpha-amylase 2 isoform X1 [Chenopodium quinoa]	RecName: Full=Probable alpha-amylase 2; Short=AtAMY2; EC=3.2.1.1 {ECO:0000250|UniProtKB:P00693}; AltName: Full=1,4-alpha-D-glucan glucanohydrolase;	RecName: Full=Alpha-amylase {ECO:0000256|PIRNR:PIRNR001028}; EC=3.2.1.1 {ECO:0000256|PIRNR:PIRNR001028}; AltName: Full=1,4-alpha-D-glucan glucanohydrolase {ECO:0000256|PIRNR:PIRNR001028};	Alpha-amylase	GO:0005829,cytosol; GO:0005576,extracellular region; GO:0004556,alpha-amylase activity; GO:0103025,alpha-amylase activity (releasing maltohexaose); GO:0005509,calcium ion binding; GO:0005975,carbohydrate metabolic process	Alpha-amylase C-terminal beta-sheet domain
gene-LOC110721657	8.05	13.65	4.95	1.98	1.45	2.91	480	799	290	110	84	168	0.189	-2.4	1.34544e-05	0.000450059	down	NW_018742616.1	3473757	3476738	-	LOC110721657	--	K13416 brassinosteroid insensitive 1-associated receptor kinase 1 [EC:2.7.10.1 2.7.11.1] | (RefSeq) BRASSINOSTEROID INSENSITIVE 1-associated receptor kinase 1-like (A)	G-type lectin S-receptor-like serine/threonine-protein kinase LECRK3 [Chenopodium quinoa]	RecName: Full=G-type lectin S-receptor-like serine/threonine-protein kinase LECRK3 {ECO:0000305}; Short=OsLecRK3 {ECO:0000303|PubMed:25485617}; EC=2.7.11.1 {ECO:0000305}; AltName: Full=OsRLCK135 {ECO:0000305}; Flags: Precursor;	SubName: Full=BRASSINOSTEROID INSENSITIVE 1-associated receptor kinase 1, putative {ECO:0000313|EMBL:EEF48838.1}; EC=2.7.10.2 {ECO:0000313|EMBL:EEF48838.1};	--	GO:0016021,integral component of membrane; GO:0005524,ATP binding; GO:0030246,carbohydrate binding; GO:0004674,protein serine/threonine kinase activity; GO:0006952,defense response	Protein kinase domain
gene-LOC110721662	18.66	20.99	17.78	10.5	9.82	8.31	496	548	465	260	254	214	0.409	-1.289	6.93198e-06	0.000245927	down	NW_018742616.1	3555468	3561421	+	LOC110721662	--	K17497 phosphomannomutase [EC:5.4.2.8] | (RefSeq) phosphomannomutase-like (A)	phosphomannomutase-like [Chenopodium quinoa]	RecName: Full=Phosphomannomutase; EC=5.4.2.8; AltName: Full=TaPMM;	RecName: Full=Phosphomannomutase {ECO:0000256|RuleBase:RU361118}; EC=5.4.2.8 {ECO:0000256|RuleBase:RU361118};	Phosphomannomutase	GO:0005737,cytoplasm; GO:0004615,phosphomannomutase activity; GO:0009298,GDP-mannose biosynthetic process	Eukaryotic phosphomannomutase
gene-LOC110721665	125.47	177.48	92.29	69.69	60.55	72.59	3029	4209	2192	1567	1423	1698	0.412	-1.28	0.00158858	0.0262012	down	NW_018742616.1	3638001	3639208	+	LOC110721665	--	K03671 thioredoxin 1 | (RefSeq) thioredoxin H1-like (A)	thioredoxin-like protein CDSP32, chloroplastic [Chenopodium quinoa]	RecName: Full=Thioredoxin-like protein CDSP32, chloroplastic; AltName: Full=Chloroplastic drought-induced stress protein of 32 KDa; Short=AtCDSP32; Flags: Precursor;	SubName: Full=Uncharacterized protein {ECO:0000313|EMBL:KMS95358.1};	Thioredoxin	GO:0009507,chloroplast; GO:0009941,chloroplast envelope; GO:0009570,chloroplast stroma; GO:0016671,oxidoreductase activity, acting on a sulfur group of donors, disulfide as acceptor; GO:0015035,protein disulfide oxidoreductase activity; GO:0047134,protein-disulfide reductase activity; GO:0004791,thioredoxin-disulfide reductase activity; GO:0045454,cell redox homeostasis; GO:0034599,cellular respo…	Thioredoxin
gene-LOC110721794	3.56	2.83	2.83	1.19	1.71	0.8	32	25	25	10	15	7	0.331	-1.596	0.00261882	0.0389264	down	NW_018742630.1	1361010	1361702	+	LOC110721794	--	--	--	--	--	--	--	--
gene-LOC110721916	1.28	5.83	0.57	0.33	0.42	0.11	25	112	11	6	8	2	0.08	-3.641	0.000300795	0.00660344	down	NW_018742630.1	3535419	3536396	-	LOC110721916	--	K03283 heat shock 70kDa protein 1/2/6/8 | (RefSeq) heat shock cognate 70 kDa protein 2-like isoform X1 (A)	uncharacterized protein LOC110721916 [Chenopodium quinoa]	--	SubName: Full=Uncharacterized protein {ECO:0000313|EMBL:KNA20402.1};	--	--	C1 domain
gene-LOC110722007	1.44	2.39	0.92	0.11	0.16	0.28	27	44	17	2	3	5	0.093	-3.431	2.40166e-05	0.000742078	down	NW_018742651.1	1104588	1105630	-	LOC110722007	--	--	uncharacterized protein LOC110722007 [Chenopodium quinoa]	--	SubName: Full=uncharacterized protein LOC101514280 {ECO:0000313|RefSeq:XP_004504096.1};	--	GO:0016021,integral component of membrane	--
gene-LOC110722062	12.79	11.11	16.01	0	0	0	267	228	329	0	0	0	0.001	-10.732	4.84601e-19	1.4412e-16	down	NW_018742651.1	821877	824975	-	LOC110722062	--	--	--	--	--	--	--	--
gene-LOC110722075	3.2	2.71	5.52	0.43	0.24	0.28	177	147	300	22	13	15	0.073	-3.783	9.45688e-25	5.53839e-22	down	NW_018742651.1	1348432	1353448	+	LOC110722075	--	--	--	--	--	--	--	--
gene-LOC110722143	0.31	0.34	0.97	0	0	0	26	28	81	0	0	0	0.004	-8.041	1.59737e-09	1.08778e-07	down	NW_018742651.1	4019471	4023962	+	LOC110722143	--	K17086 transmembrane 9 superfamily member 2/4 | (RefSeq) uncharacterized LOC101300290 (A)	uncharacterized protein LOC110722143 isoform X1 [Chenopodium quinoa]	--	SubName: Full=Uncharacterized protein {ECO:0000313|EMBL:KNA10075.1}; Flags: Fragment;	--	GO:0003677,DNA binding; GO:0004803,transposase activity; GO:0006313,transposition, DNA-mediated	MULE transposase domain
gene-LOC110722151	1.78	2.3	0.57	0.44	0.57	0.31	48	61	15	11	15	8	0.217	-2.207	0.00211898	0.0328032	down	NW_018742204.1	20138091	20140775	+	LOC110722151	--	K18211 synaptosomal-associated protein 25 | (RefSeq) putative SNAP25 homologous protein SNAP30 (A)	putative SNAP25 homologous protein SNAP30 [Chenopodium quinoa]	RecName: Full=Putative SNAP25 homologous protein SNAP30; Short=AtSNAP30; AltName: Full=Synaptosomal-associated protein SNAP25-like 3;	SubName: Full=Uncharacterized protein {ECO:0000313|EMBL:KNA20049.1};	SNAP-25 (synaptosome-associated protein) component of SNARE complex	GO:0005737,cytoplasm; GO:0005886,plasma membrane; GO:0005484,SNAP receptor activity; GO:0061025,membrane fusion; GO:0015031,protein transport; GO:0016192,vesicle-mediated transport	Snare region anchored in the vesicle membrane C-terminus
gene-LOC110722180	0.47	0.17	0.54	0	0	0	22	8	25	0	0	0	0.009	-6.78	1.70678e-06	6.86081e-05	down	NW_018742651.1	4024116	4026730	-	LOC110722180	--	K12524 bifunctional aspartokinase / homoserine dehydrogenase 1 [EC:2.7.2.4 1.1.1.3] | (RefSeq) bifunctional aspartokinase/homoserine dehydrogenase 2, chloroplastic-like (A)	zinc finger MYM-type protein 1-like [Chenopodium quinoa]	--	SubName: Full=Zinc finger MYM-type protein 1 {ECO:0000313|EMBL:KYP64740.1};	--	GO:0046983,protein dimerization activity	Domain of unknown function (DUF4371)
gene-LOC110722287	2.76	3.64	1.21	0.4	0.99	0.61	37	48	16	5	13	8	0.204	-2.291	0.00130238	0.0222721	down	NW_018742669.1	142901	145315	+	LOC110722287	--	--	--	--	--	--	--	--
gene-LOC110722319	1.76	1.23	4.94	0.33	0.63	0.38	86	59	238	15	30	18	0.153	-2.712	8.63191e-08	4.44042e-06	down	NW_018742669.1	304438	306964	+	LOC110722319	--	--	--	--	--	--	--	--
gene-LOC110722321	5.78	6.53	6.09	0	0	0	265	294	275	0	0	0	0.001	-10.79	1.22085e-18	3.41722e-16	down	NW_018742669.1	332372	334666	+	LOC110722321	--	--	--	--	--	--	--	--
gene-LOC110722418	12.39	9.61	10.35	0	0	0	202	154	166	0	0	0	0.001	-10.103	2.00416e-16	3.66789e-14	down	NW_018742681.1	2742122	2743553	-	LOC110722418	--	--	--	--	--	--	--	--
[truncated: 1,620 more rows]
