# Supplementary material for: Elucidating the Differentiation Synthesis Mechanisms of Differently Colored Resistance Quinoa Seedings Using Metabolite Profiling and Transcriptome Analysis
Source: Metabolites. 2023 Oct 10;13(10):1065. doi: 10.3390/metabo13101065 (PMC10609267; doi:10.3390/metabo13101065)
Supplement: Supplementary file 1 [file metabolites-13-01065-s001.zip › Table S16.xlsx]

## Sheet: Sheet1
Table S16 Number of differential genes in R-RvsR-Y
ID	R-R1_fpkm	R-R2_fpkm	R-R3_fpkm	R-Y1_fpkm	R-Y2_fpkm	R-Y3_fpkm	R-R1_count	R-R2_count	R-R3_count	R-Y1_count	R-Y2_count	R-Y3_count	FoldChange	log2FoldChange	pvalue	padj	regulated	chr	start	end	strand	gene_name	gene_description	KEGG	NR	Swissprot	Tremble	KOG	GO	Pfam
gene-LOC110681586	0.53	0.48	0.57	0	0	0	35	31	37	0	0	0	0.006	-7.401	2.59028e-08	1.054e-06	down	NW_018743555.1	3390031	3394211	-	LOC110681586	--	--	uncharacterized protein LOC110681586 [Chenopodium quinoa]	--	SubName: Full=Uncharacterized protein {ECO:0000313|EMBL:KNA13421.1};	--	--	--
gene-LOC110681661	4.84	7.74	3.23	1.3	1.37	2.53	192	302	126	49	58	92	0.34	-1.554	0.00482198	0.0357102	down	NW_018743572.1	401636	406686	+	LOC110681661	--	--	--	--	--	--	--	--
gene-LOC110681669	1.75	2.23	3.3	0.39	0	0	28	35	52	6	0	0	0.056	-4.151	7.39062e-05	0.00130468	down	NW_018743572.1	1225170	1228780	+	LOC110681669	--	--	--	--	--	--	--	--
gene-LOC110681696	0.47	0.38	0.37	0	0.06	0	14	11	11	0	2	0	0.06	-4.055	0.00408282	0.0317659	down	NW_018743574.1	3701064	3716054	+	LOC110681696	--	K14432 ABA responsive element binding factor | (RefSeq) ABSCISIC ACID-INSENSITIVE 5-like protein 2 (A)	protein FD-like [Chenopodium quinoa]	RecName: Full=Protein FD {ECO:0000303|PubMed:16099980}; AltName: Full=bZIP transcription factor 14 {ECO:0000303|PubMed:11906833}; Short=AtbZIP14 {ECO:0000303|PubMed:11906833};	SubName: Full=Uncharacterized protein {ECO:0000313|EMBL:KNA16704.1};	--	GO:0005634,nucleus; GO:0003677,DNA binding; GO:0003700,DNA-binding transcription factor activity; GO:0043621,protein self-association; GO:0009648,photoperiodism; GO:0009911,positive regulation of flower development; GO:0045893,positive regulation of transcription, DNA-templated; GO:0009909,regulation of flower development; GO:2000028,regulation of photoperiodism, flowering; GO:0006355,regulation …	bZIP transcription factor
gene-LOC110681738	4.65	3.89	4.24	0.93	0.18	0.89	503	414	452	96	21	88	0.165	-2.598	1.38059e-06	3.95783e-05	down	NW_018743574.1	913577	924422	-	LOC110681738	--	--	--	--	--	--	--	--
gene-LOC110681741	0.44	0.61	0.92	0.29	0.08	0.06	26	35	53	16	5	3	0.23	-2.12	0.00262772	0.0230143	down	NW_018742244.1	2818981	2822570	+	LOC110681741	--	K10738 DNA helicase MCM9 [EC:3.6.4.12] | (RefSeq) probable DNA helicase MCM9 (A)	probable DNA helicase MCM9 [Chenopodium quinoa]	RecName: Full=Probable DNA helicase MCM9; EC=3.6.4.12; AltName: Full=Minichromosome maintenance 9; Short=AtMCM9;	SubName: Full=Uncharacterized protein {ECO:0000313|EMBL:KNA22946.1};	DNA replication licensing factor, MCM2 component	GO:0005634,nucleus; GO:0005524,ATP binding; GO:0003677,DNA binding; GO:0004386,helicase activity; GO:0046872,metal ion binding; GO:0006281,DNA repair; GO:0006270,DNA replication initiation; GO:0051321,meiotic cell cycle	MCM P-loop domain
gene-LOC110681794	17.15	20.8	26.99	9.26	11.89	7	591	704	915	303	438	221	0.48	-1.059	0.000537258	0.00672112	down	NW_018742244.1	2872935	2874659	-	LOC110681794	--	--	LOW QUALITY PROTEIN: protein EXORDIUM-like 5 [Chenopodium quinoa]	RecName: Full=Protein EXORDIUM-like 5; Flags: Precursor;	SubName: Full=Uncharacterized protein {ECO:0000313|EMBL:KNA13166.1};	--	GO:0048046,apoplast; GO:0005615,extracellular space	Phosphate-induced protein 1 conserved region
gene-LOC110681798	2.24	1.85	2.01	0	0	0	69	56	61	0	0	0	0.003	-8.264	1.12359e-10	6.96028e-09	down	NW_018743574.1	55190	58158	+	LOC110681798	--	--	--	--	--	--	--	--
gene-LOC110681824	3.61	2.52	6.08	2.31	1.54	1.12	179	123	297	109	82	51	0.458	-1.127	0.00167303	0.0164199	down	NW_018742244.1	2911059	2919104	+	LOC110681824	--	K14771 U3 small nucleolar RNA-associated protein 19 | (RefSeq) nucleolar complex protein 4 homolog B-like (A)	nucleolar complex protein 4 homolog B-like [Chenopodium quinoa]	--	SubName: Full=Uncharacterized protein {ECO:0000313|EMBL:KNA05689.1};	Predicted nucleolar protein involved in ribosome biogenesis	GO:0042254,ribosome biogenesis	CBF/Mak21 family
gene-LOC110681890	4.19	4.22	4.69	0.99	0.53	1.32	170	168	187	38	23	49	0.233	-2.1	1.83811e-07	6.37904e-06	down	NW_018743574.1	1301790	1305734	-	LOC110681890	--	K14638 solute carrier family 15 (peptide/histidine transporter), member 3/4 | (RefSeq) protein NRT1/ PTR FAMILY 8.3-like (A)	protein NRT1/ PTR FAMILY 8.3-like [Chenopodium quinoa]	RecName: Full=Protein NRT1/ PTR FAMILY 8.3; Short=AtNPF8.3; AltName: Full=Histidine-transporting protein; AltName: Full=Peptide transporter PTR2;	SubName: Full=Uncharacterized protein {ECO:0000313|EMBL:KNA06464.1};	H+/oligopeptide symporter	GO:0005794,Golgi apparatus; GO:0016021,integral component of membrane; GO:0000325,plant-type vacuole; GO:0009705,plant-type vacuole membrane; GO:0005774,vacuolar membrane; GO:0005773,vacuole; GO:0042936,NA; GO:0015334,high-affinity oligopeptide transmembrane transporter activity; GO:0015197,NA; GO:0042937,tripeptide transmembrane transporter activity; GO:0042938,dipeptide transport; GO:0015833,pe…	POT family
gene-LOC110681898	3.6	3.25	4.45	2.54	1.25	1.12	211	187	256	141	78	60	0.465	-1.103	0.00130664	0.0135616	down	NW_018743574.1	1382429	1389188	-	LOC110681898	--	K03549 KUP system potassium uptake protein | (RefSeq) probable potassium transporter 17 (A)	probable potassium transporter 17 [Chenopodium quinoa]	RecName: Full=Probable potassium transporter 17; AltName: Full=OsHAK17;	RecName: Full=Potassium transporter {ECO:0000256|RuleBase:RU321113};	--	GO:0016021,integral component of membrane; GO:0016020,membrane; GO:0015079,potassium ion transmembrane transporter activity	K+ potassium transporter
gene-LOC110681908	4.94	4.38	4.66	2.08	1.89	1.98	212	185	197	85	87	78	0.461	-1.117	6.26007e-05	0.00113624	down	NW_018743574.1	1503658	1516181	+	LOC110681908	--	--	uncharacterized protein LOC110681908 [Chenopodium quinoa]	--	RecName: Full=Patatin {ECO:0000256|RuleBase:RU361262}; EC=3.1.1.- {ECO:0000256|RuleBase:RU361262};	Adiponutrin and related vesicular transport proteins; predicted alpha/beta hydrolase	GO:0016787,hydrolase activity; GO:0016042,lipid catabolic process	Patatin-like phospholipase
gene-LOC110681929	14.23	4.53	66.72	9.11	2.27	1.94	393	123	1813	239	67	49	0.186	-2.426	0.00271276	0.0235602	down	NW_018743574.1	1699548	1700929	-	LOC110681929	--	K10808 ribonucleoside-diphosphate reductase subunit M2 [EC:1.17.4.1] | (RefSeq) ribonucleoside-diphosphate reductase small chain-like (A)	ribonucleoside-diphosphate reductase small chain-like [Chenopodium quinoa]	RecName: Full=Ribonucleoside-diphosphate reductase small chain; EC=1.17.4.1; AltName: Full=Ribonucleoside-diphosphate reductase R2 subunit; AltName: Full=Ribonucleotide reductase small subunit;	SubName: Full=Uncharacterized protein {ECO:0000313|EMBL:KNA15253.1};	Ribonucleotide reductase, beta subunit	GO:0005737,cytoplasm; GO:0046872,metal ion binding; GO:0004748,ribonucleoside-diphosphate reductase activity, thioredoxin disulfide as acceptor; GO:0009263,deoxyribonucleotide biosynthetic process; GO:0006260,DNA replication	Ribonucleotide reductase, small chain
gene-LOC110681934	297.95	294.06	231.98	155.65	111.75	118.14	6377	6183	4885	3163	2558	2318	0.492	-1.024	0.000516506	0.00650271	down	NW_018743574.1	1743602	1746109	+	LOC110681934	--	K02899 large subunit ribosomal protein L27 | (RefSeq) 50S ribosomal protein L27, chloroplastic-like (A)	50S ribosomal protein L27, chloroplastic-like [Chenopodium quinoa]	RecName: Full=50S ribosomal protein L27, chloroplastic {ECO:0000303|PubMed:10874046}; AltName: Full=CL27; AltName: Full=Chloroplastic large ribosomal subunit protein bL27c {ECO:0000303|PubMed:28007896}; Flags: Precursor;	SubName: Full=Uncharacterized protein {ECO:0000313|EMBL:KJB33993.1};	Mitochondrial ribosomal protein MRP7 (L2)	GO:0009507,chloroplast; GO:0005840,ribosome; GO:0003735,structural constituent of ribosome; GO:0006412,translation	Ribosomal L27 protein
gene-LOC110681958	11.23	15.4	17.89	1.84	1.06	1.97	386	520	605	60	39	62	0.118	-3.078	7.60424e-20	2.06512e-17	down	NW_018743574.1	1973402	1975154	+	LOC110681958	--	--	36.4 kDa proline-rich protein-like [Chenopodium quinoa]	RecName: Full=36.4 kDa proline-rich protein;	SubName: Full=Uncharacterized protein {ECO:0000313|EMBL:CAN77497.1};	--	--	Hydrophobic seed protein
gene-LOC110682009	2.45	2.55	3.29	0	0.05	0	84	86	111	0	2	0	0.008	-6.988	2.04814e-10	1.23e-08	down	NW_018743574.1	2457301	2459115	+	LOC110682009	--	K11866 STAM-binding protein [EC:3.4.19.12] | (RefSeq) probable ubiquitin thioesterase DG1039 (A)	zinc finger BED domain-containing protein RICESLEEPER 1-like [Chenopodium quinoa]	RecName: Full=Zinc finger BED domain-containing protein RICESLEEPER 2; AltName: Full=Transposase-like protein RICESLEEPER 2;	SubName: Full=Uncharacterized protein {ECO:0000313|EMBL:KMS98900.1};	Tam3-transposase (Ac family)	GO:0005634,nucleus; GO:0003700,DNA-binding transcription factor activity; GO:0046872,metal ion binding; GO:0046983,protein dimerization activity; GO:0000977,RNA polymerase II regulatory region sequence-specific DNA binding; GO:0009791,post-embryonic development; GO:0006357,regulation of transcription by RNA polymerase II; GO:0006351,transcription, DNA-templated	hAT family C-terminal dimerisation region
gene-LOC110682026	2	1.26	2.69	0.5	0.24	0.06	71	44	94	17	9	2	0.148	-2.758	1.44206e-05	0.000316304	down	NW_018742244.1	3026560	3029685	-	LOC110682026	--	--	--	--	--	--	--	--
gene-LOC110682038	35.74	53.81	24.5	3.85	3.19	3.17	430	636	290	44	41	35	0.092	-3.446	1.84332e-13	1.83614e-11	down	NW_018743574.1	2842172	2844145	+	LOC110682038	--	K22075 BolA-like protein 3 | (RefSeq) protein BOLA2 (A)	protein BOLA2-like [Chenopodium quinoa]	RecName: Full=Protein BOLA2 {ECO:0000303|PubMed:24203231};	SubName: Full=Uncharacterized protein {ECO:0000313|EMBL:EXB76036.1};	BolA (bacterial stress-induced morphogen)-related protein	GO:0005737,cytoplasm; GO:0005829,cytosol; GO:0005634,nucleus; GO:0010039,response to iron ion; GO:0006979,response to oxidative stress	BolA-like protein
gene-LOC110682042	3.64	2.25	5.27	1.9	1.17	1.56	99	60	141	49	34	39	0.465	-1.105	0.00252276	0.02232	down	NW_018743574.1	2868246	2869606	+	LOC110682042	--	--	uncharacterized protein LOC110682042 [Chenopodium quinoa]	--	SubName: Full=Uncharacterized protein {ECO:0000313|EMBL:KNA23938.1};	--	GO:0016021,integral component of membrane	--
gene-LOC110682052	14.92	3.9	68.53	9.47	3.37	2.09	974	250	4402	587	235	125	0.206	-2.276	0.00428013	0.0327414	down	NW_018743574.1	2957654	2962734	-	LOC110682052	--	K10807 ribonucleoside-diphosphate reductase subunit M1 [EC:1.17.4.1] | (RefSeq) ribonucleoside-diphosphate reductase large subunit-like (A)	ribonucleoside-diphosphate reductase large subunit-like [Chenopodium quinoa]	RecName: Full=Ribonucleoside-diphosphate reductase large subunit {ECO:0000303|PubMed:10542051}; EC=1.17.4.1; AltName: Full=Protein DEFECTIVE IN POLLEN DNA DEGRADATION 2 {ECO:0000303|PubMed:22239102}; AltName: Full=Ribonucleoside-diphosphate reductase R1 subunit {ECO:0000303|PubMed:10542051}; Short=AtRNR1;	RecName: Full=Ribonucleoside-diphosphate reductase {ECO:0000256|RuleBase:RU003410}; EC=1.17.4.1 {ECO:0000256|RuleBase:RU003410};	Ribonucleotide reductase, alpha subunit	GO:0005737,cytoplasm; GO:0005524,ATP binding; GO:0004748,ribonucleoside-diphosphate reductase activity, thioredoxin disulfide as acceptor; GO:0009202,deoxyribonucleoside triphosphate biosynthetic process; GO:0009263,deoxyribonucleotide biosynthetic process; GO:0006260,DNA replication; GO:0046686,response to cadmium ion	Ribonucleotide reductase, barrel domain
gene-LOC110682057	400.89	291.17	432.57	285.78	129.92	103.61	11889	8483	12622	8047	4121	2817	0.493	-1.021	0.00484397	0.0358229	down	NW_018743574.1	3004283	3007359	-	LOC110682057	--	K02925 large subunit ribosomal protein L3e | (RefSeq) 60S ribosomal protein L3 (A)	60S ribosomal protein L3 [Chenopodium quinoa]	RecName: Full=60S ribosomal protein L3;	SubName: Full=Uncharacterized protein {ECO:0000313|EMBL:KCW71110.1};	60S ribosomal protein L3 and related proteins	GO:0022625,cytosolic large ribosomal subunit; GO:0003723,RNA binding; GO:0003735,structural constituent of ribosome; GO:0000027,ribosomal large subunit assembly; GO:0006412,translation	Ribosomal protein L3
gene-LOC110682088	4.8	2.98	4.69	1.44	1.28	1.84	77	47	74	22	22	27	0.403	-1.31	0.00142002	0.0144811	down	NW_018743574.1	3372129	3372931	+	LOC110682088	--	--	protein SKIP34-like [Chenopodium quinoa]	--	--	--	--	Type II secretion system (T2SS), protein F
gene-LOC110682126	7.78	8.99	12.04	6.08	3.91	3.03	361	410	550	268	194	129	0.49	-1.029	0.000485721	0.00620083	down	NW_018743574.1	3793087	3797754	-	LOC110682126	--	--	protein MID1-COMPLEMENTING ACTIVITY 1-like [Chenopodium quinoa]	RecName: Full=Protein MID1-COMPLEMENTING ACTIVITY 1;	SubName: Full=Uncharacterized protein {ECO:0000313|EMBL:KNA21554.1};	--	GO:0005887,integral component of plasma membrane; GO:0005262,calcium channel activity; GO:0006816,calcium ion transport; GO:0033500,carbohydrate homeostasis; GO:0007638,mechanosensory behavior; GO:0007231,osmosensory signaling pathway	PLAC8 family
gene-LOC110682130	9.05	5.49	35.99	4.94	2.52	2.44	396	236	1549	205	118	98	0.235	-2.091	0.000272731	0.00389137	down	NW_018743574.1	3856143	3859388	-	LOC110682130	--	K00108 choline dehydrogenase [EC:1.1.99.1] | (RefSeq) protein HOTHEAD (A)	protein HOTHEAD-like [Chenopodium quinoa]	RecName: Full=Protein HOTHEAD; AltName: Full=Protein ADHESION OF CALYX EDGES; Flags: Precursor;	SubName: Full=Uncharacterized protein {ECO:0000313|EMBL:KNA03049.1};	Glucose dehydrogenase/choline dehydrogenase/mandelonitrile lyase (GMC oxidoreductase family)	GO:0005576,extracellular region; GO:0050660,flavin adenine dinucleotide binding; GO:0046593,mandelonitrile lyase activity; GO:0016614,oxidoreductase activity, acting on CH-OH group of donors; GO:0007267,cell-cell signaling; GO:0009553,embryo sac development; GO:0010430,fatty acid omega-oxidation	GMC oxidoreductase
gene-LOC110682159	3.15	1.74	3.79	1.22	1.01	0.78	114	62	135	42	39	26	0.388	-1.367	0.000229376	0.00338259	down	NW_018742244.1	3240965	3243865	-	LOC110682159	--	K17604 zinc finger SWIM domain-containing protein 3 | (RefSeq) protein FAR1-RELATED SEQUENCE 5-like isoform X1 (A)	protein FAR1-RELATED SEQUENCE 9-like [Chenopodium quinoa]	RecName: Full=Protein FAR1-RELATED SEQUENCE 9;	SubName: Full=Uncharacterized protein {ECO:0000313|EMBL:KNA22826.1};	--	GO:0005634,nucleus; GO:0008270,zinc ion binding; GO:0006355,regulation of transcription, DNA-templated	MULE transposase domain
gene-LOC110682167	5.08	3.99	5.65	1.78	1.47	0.69	201	155	220	67	62	25	0.291	-1.779	2.92305e-06	7.64085e-05	down	NW_018742244.1	3221280	3240728	-	LOC110682167	--	K19041 E3 ubiquitin-protein ligase RNF38/44 [EC:2.3.2.27] | (RefSeq) E3 ubiquitin-protein ligase MBR2 (A)	uncharacterized protein LOC110682167 [Chenopodium quinoa]	RecName: Full=Probable E3 ubiquitin-protein ligase HIP1; EC=2.3.2.27; AltName: Full=HAL3-interacting protein 1; Short=OsHIP1; AltName: Full=RING-H2 finger HIP1; AltName: Full=RING-type E3 ubiquitin transferase HIP1 {ECO:0000305};	SubName: Full=Putative E3 ubiquitin-protein ligase HIP1 {ECO:0000313|EMBL:OAY77426.1};	FOG: Predicted E3 ubiquitin ligase	GO:0046872,metal ion binding; GO:0061630,ubiquitin protein ligase activity; GO:0043161,proteasome-mediated ubiquitin-dependent protein catabolic process; GO:0040008,regulation of growth	Ring finger domain
gene-LOC110682184	50.6	36.96	45.09	31.13	14.5	11.96	1445	1037	1267	844	443	313	0.458	-1.127	0.00218706	0.020094	down	NW_018742244.1	3265177	3267272	-	LOC110682184	--	K15032 mTERF domain-containing protein, mitochondrial | (RefSeq) transcription termination factor MTERF6, chloroplastic/mitochondrial-like (A)	transcription termination factor MTERF6, chloroplastic/mitochondrial-like [Chenopodium quinoa]	RecName: Full=Transcription termination factor MTERF6, chloroplastic/mitochondrial {ECO:0000305}; AltName: Full=Mitochondrial transcription termination factor 6 {ECO:0000303|PubMed:23087700}; AltName: Full=Protein PIGMENT DEFECTIVE 191 {ECO:0000305}; Flags: Precursor;	SubName: Full=Uncharacterized protein {ECO:0000313|EMBL:KNA22834.1};	Mitochondrial transcription termination factor, mTERF	GO:0009507,chloroplast; GO:0005739,mitochondrion; GO:0003690,double-stranded DNA binding; GO:0003723,RNA binding; GO:0006353,DNA-templated transcription, termination; GO:0006355,regulation of transcription, DNA-templated; GO:0008033,tRNA processing	mTERF
gene-LOC110682193	3.24	1.14	4.91	1.1	0.54	0.63	124	43	185	40	22	22	0.278	-1.849	0.000430899	0.00562594	down	NW_018742244.1	3268099	3272060	+	LOC110682193	--	K03457 nucleobase:cation symporter-1, NCS1 family | (RefSeq) pentatricopeptide repeat-containing protein At4g38150 isoform X1 (A)	pentatricopeptide repeat-containing protein At4g38150-like [Chenopodium quinoa]	RecName: Full=Pentatricopeptide repeat-containing protein At4g38150;	SubName: Full=Uncharacterized protein {ECO:0000313|EMBL:KNA22836.1};	FOG: PPR repeat	GO:0043231,intracellular membrane-bounded organelle; GO:0004519,endonuclease activity; GO:0003723,RNA binding; GO:0009451,RNA modification	PPR repeat family
gene-LOC110682211	5.4	3.67	10.76	2.84	1.53	2.14	102	68	200	51	31	37	0.374	-1.419	0.000671632	0.0080514	down	NW_018743574.1	4721371	4722406	+	LOC110682211	--	K02892 large subunit ribosomal protein L23 | (RefSeq) uncharacterized protein LOC110717831 (A)	uncharacterized protein LOC110717831 [Chenopodium quinoa]	RecName: Full=50S ribosomal protein L23, chloroplastic;	SubName: Full=Uncharacterized protein {ECO:0000313|EMBL:KNA22060.1};	Predicted mitochondrial ribosomal protein L23	GO:0009507,chloroplast; GO:0005840,ribosome; GO:0019843,rRNA binding; GO:0003735,structural constituent of ribosome; GO:0006412,translation	Ribosomal protein L23
gene-LOC110682221	2.57	1.97	5.91	1.27	1.13	0.9	121	91	274	57	57	39	0.367	-1.447	0.000305948	0.00427229	down	NW_018743574.1	4820396	4824774	+	LOC110682221	--	--	--	--	--	--	--	--
gene-LOC110682238	2.72	1.82	5.49	0.53	0.45	0.3	120	79	238	22	21	12	0.146	-2.779	7.6787e-10	4.05127e-08	down	NW_018743574.1	4967482	4970989	+	LOC110682238	--	K11717 cysteine desulfurase / selenocysteine lyase [EC:2.8.1.7 4.4.1.16] | (RefSeq) hypothetical protein (A)	uncharacterized protein LOC110682238 [Chenopodium quinoa]	--	SubName: Full=Uncharacterized protein {ECO:0000313|EMBL:KNA04412.1};	Uncharacterized conserved protein with similarity to predicted ATPase of the PP-loop superfamily	GO:0003824,catalytic activity	Aminotransferase class-V
gene-LOC110682240	0.33	0.12	0.81	0.09	0.03	0.06	19	7	46	5	2	3	0.167	-2.585	0.00466381	0.0348663	down	NW_018743574.1	4984409	4989874	-	LOC110682240	--	K01354 oligopeptidase B [EC:3.4.21.83] | (RefSeq) prolyl endopeptidase-like (A)	uncharacterized protein LOC110682240 [Chenopodium quinoa]	--	SubName: Full=Uncharacterized protein {ECO:0000313|EMBL:KNA16379.1};	Predicted serine protease	GO:0004252,serine-type endopeptidase activity; GO:0070008,serine-type exopeptidase activity	Prolyl oligopeptidase, N-terminal beta-propeller domain
gene-LOC110682269	21.06	30.63	12.04	5.75	5.32	9.39	455	650	256	118	123	186	0.331	-1.597	0.00209403	0.0194433	down	NW_018743574.1	5255519	5258232	+	LOC110682269	--	K15634 probable phosphoglycerate mutase [EC:5.4.2.12] | (RefSeq) phosphoglycerate mutase-like protein 4 (A)	phosphoglycerate mutase-like protein 4 [Chenopodium quinoa]	RecName: Full=Phosphoglycerate mutase-like protein 4 {ECO:0000305};	SubName: Full=Uncharacterized protein {ECO:0000313|EMBL:KNA24193.1};	Phosphoglycerate mutase	GO:0005829,cytosol; GO:0016791,phosphatase activity	Histidine phosphatase superfamily (branch 1)
gene-LOC110682276	5.31	2.28	5.86	2.31	0.69	1.11	230	97	250	95	32	44	0.333	-1.585	0.00121929	0.0128915	down	NW_018743574.1	5313628	5316977	-	LOC110682276	--	K04708 3-dehydrosphinganine reductase [EC:1.1.1.102] | (RefSeq) hypothetical protein (A)	uncharacterized protein LOC110682276 isoform X1 [Chenopodium quinoa]	--	SubName: Full=Uncharacterized protein {ECO:0000313|EMBL:KNA07499.1};	17 beta-hydroxysteroid dehydrogenase type 3, HSD17B3	--	short chain dehydrogenase
gene-LOC110682322	0.68	1.29	2.86	0.56	0.18	0.16	14	26	58	11	4	3	0.209	-2.258	0.0042422	0.0325587	down	NW_018743574.1	5924520	5926244	+	LOC110682322	--	K00588 caffeoyl-CoA O-methyltransferase [EC:2.1.1.104] | (RefSeq) caffeoyl-CoA O-methyltransferase 1-like (A)	caffeoyl-CoA O-methyltransferase 1-like [Chenopodium quinoa]	RecName: Full=Caffeoyl-CoA O-methyltransferase 2; EC=2.1.1.104; AltName: Full=Trans-caffeoyl-CoA 3-O-methyltransferase 2; Short=CCoAMT-2; Short=CCoAOMT-2;	SubName: Full=Uncharacterized protein {ECO:0000313|EMBL:EMJ02436.1};	O-methyltransferase	GO:0042409,caffeoyl-CoA O-methyltransferase activity; GO:0046872,metal ion binding; GO:0009809,lignin biosynthetic process	O-methyltransferase
gene-LOC110682333	0.65	1.34	0.36	0	0	0	29	59	16	0	0	0	0.005	-7.536	4.80449e-07	1.52868e-05	down	NW_018742244.1	3426327	3428561	-	LOC110682333	--	--	--	--	--	--	--	--
gene-LOC110682361	0.36	0.14	0.4	0.01	0	0	27	10	29	1	0	0	0.019	-5.741	5.85077e-05	0.00107554	down	NW_018742244.1	3411740	3416567	+	LOC110682361	--	K19747 BAHD acyltransferase [EC:2.3.1.-] | (RefSeq) BAHD acyltransferase DCR-like (A)	uncharacterized acetyltransferase At3g50280-like [Chenopodium quinoa]	RecName: Full=Uncharacterized acetyltransferase At3g50280; EC=2.3.1.-;	SubName: Full=Uncharacterized protein {ECO:0000313|EMBL:KNA08733.1};	--	GO:0016747,transferase activity, transferring acyl groups other than amino-acyl groups	Transferase family
gene-LOC110682382	176.31	121.64	169.02	97.96	52.5	50.6	2942	1994	2775	1552	937	774	0.461	-1.116	0.000133889	0.00214924	down	NW_018743574.1	6736896	6739318	+	LOC110682382	--	K15223 upstream activation factor subunit UAF30 | (RefSeq) uncharacterized protein LOC111811315 (A)	upstream activation factor subunit UAF30-like [Chenopodium quinoa]	RecName: Full=SWI/SNF complex component SNF12 homolog;	SubName: Full=Uncharacterized protein {ECO:0000313|EMBL:KNA17246.1};	RNA polymerase I transcription factor UAF	GO:0005634,nucleus; GO:0016569,covalent chromatin modification; GO:0006281,DNA repair; GO:0009909,regulation of flower development; GO:0010468,regulation of gene expression; GO:2000024,regulation of leaf development; GO:0006355,regulation of transcription, DNA-templated; GO:0010224,response to UV-B; GO:0048364,root development; GO:0006351,transcription, DNA-templated	SWIB/MDM2 domain
gene-LOC110682423	5.44	1.71	20.53	3.43	1.4	0.69	207	64	768	124	57	24	0.238	-2.069	0.00698268	0.0466102	down	NW_018743574.1	7194499	7204075	-	LOC110682423	--	K19891 glucan endo-1,3-beta-glucosidase 1/2/3 [EC:3.2.1.39] | (RefSeq) hypothetical protein (A)	glucan endo-1,3-beta-glucosidase 12-like isoform X1 [Chenopodium quinoa]	RecName: Full=Glucan endo-1,3-beta-glucosidase 1; EC=3.2.1.39; AltName: Full=(1->3)-beta-glucan endohydrolase 1; Short=(1->3)-beta-glucanase 1; AltName: Full=Beta-1,3-endoglucanase 1; Short=Beta-1,3-glucanase 1; Flags: Precursor;	SubName: Full=Glycoside hydrolase {ECO:0000313|EMBL:OVA09367.1};	--	GO:0046658,anchored component of plasma membrane; GO:0042973,glucan endo-1,3-beta-D-glucosidase activity; GO:0004553,hydrolase activity, hydrolyzing O-glycosyl compounds; GO:0030247,polysaccharide binding; GO:0005975,carbohydrate metabolic process; GO:0006952,defense response	X8 domain
gene-LOC110682424	10.08	4.48	7.67	2.25	1.39	2.17	401	175	300	85	59	79	0.285	-1.812	2.08688e-06	5.68587e-05	down	NW_018743574.1	7209570	7213418	-	LOC110682424	--	K04498 E1A/CREB-binding protein [EC:2.3.1.48] | (RefSeq) histone acetyltransferase HAC1-like (A)	BTB/POZ and TAZ domain-containing protein 4-like [Chenopodium quinoa]	RecName: Full=BTB/POZ and TAZ domain-containing protein 4; AltName: Full=BTB and TAZ domain protein 4;	SubName: Full=BTB/POZ and TAZ domain-containing protein 4-like isoform X3 {ECO:0000313|RefSeq:XP_018809310.1};	CREB binding protein/P300 and related TAZ Zn-finger proteins	GO:0005737,cytoplasm; GO:0005634,nucleus; GO:0019005,SCF ubiquitin ligase complex; GO:0005774,vacuolar membrane; GO:0005516,calmodulin binding; GO:0004402,histone acetyltransferase activity; GO:0003712,transcription coregulator activity; GO:0031625,ubiquitin protein ligase binding; GO:0008270,zinc ion binding; GO:0043161,proteasome-mediated ubiquitin-dependent protein catabolic process; GO:004278…	BTB/POZ domain
gene-LOC110682431	236.85	143.14	223.38	142.68	53.35	58.1	3815	2265	3540	2182	919	858	0.448	-1.158	0.00271192	0.0235584	down	NW_018743574.1	7271269	7272074	-	LOC110682431	--	K02898 large subunit ribosomal protein L26e | (RefSeq) 60S ribosomal protein L26-1 (A)	60S ribosomal protein L26-1 [Chenopodium quinoa]	RecName: Full=60S ribosomal protein L26-1;	SubName: Full=60S ribosomal protein L26-1-like {ECO:0000313|RefSeq:XP_016508756.1};	60S ribosomal protein L26	GO:0009507,chloroplast; GO:0005829,cytosol; GO:0022625,cytosolic large ribosomal subunit; GO:0022626,cytosolic ribosome; GO:0016020,membrane; GO:0005730,nucleolus; GO:0005634,nucleus; GO:0005886,plasma membrane; GO:0042788,polysomal ribosome; GO:0005774,vacuolar membrane; GO:0003729,mRNA binding; GO:0003723,RNA binding; GO:0003735,structural constituent of ribosome; GO:0002181,cytoplasmic transla…	Ribosomal proteins L26 eukaryotic, L24P archaeal
gene-LOC110682435	9.82	7.64	7.19	4.1	3.42	3.41	204	156	147	81	76	65	0.474	-1.077	0.00124793	0.0131089	down	NW_018743574.1	7300719	7303710	-	LOC110682435	--	--	uncharacterized protein LOC110682435 [Chenopodium quinoa]	--	SubName: Full=Uncharacterized protein {ECO:0000313|EMBL:KNA12099.1}; Flags: Fragment;	--	--	--
gene-LOC110682549	3.92	3.6	4.4	2.63	1.48	1.32	94	85	104	60	38	29	0.489	-1.032	0.00447095	0.0337594	down	NW_018743574.1	8568678	8573360	+	LOC110682549	--	K15115 solute carrier family 25 (mitochondrial folate transporter), member 32 | (RefSeq) folate transporter 1, chloroplastic-like isoform X1 (A)	folate transporter 1, chloroplastic-like isoform X1 [Chenopodium quinoa]	RecName: Full=Folate transporter 1, chloroplastic; Short=AtFOLT1;	SubName: Full=Uncharacterized protein {ECO:0000313|EMBL:KNA17903.1};	Mitochondrial FAD carrier protein	GO:0009507,chloroplast; GO:0009941,chloroplast envelope; GO:0031969,chloroplast membrane; GO:0016021,integral component of membrane; GO:0015230,FAD transmembrane transporter activity; GO:0006839,mitochondrial transport	Mitochondrial carrier protein
gene-LOC110682644	1.69	1.61	1.22	0.63	0.25	0.18	31	29	22	11	5	3	0.244	-2.036	0.00417724	0.0322523	down	NW_018743575.1	1109963	1112845	+	LOC110682644	--	K20537 mitogen-activated protein kinase 7/14 [EC:2.7.11.24] | (RefSeq) mitogen-activated protein kinase 7-like (A)	uncharacterized protein LOC110682644 [Chenopodium quinoa]	--	SubName: Full=Uncharacterized protein {ECO:0000313|EMBL:KNA14823.1}; Flags: Fragment;	--	GO:0003676,nucleic acid binding	Reverse transcriptase-like
gene-LOC110682669	9.52	2.47	9.29	0.65	1.02	0.47	200	51	192	13	23	9	0.116	-3.105	1.66068e-07	5.80292e-06	down	NW_018743575.1	565120	568762	+	LOC110682669	--	K15730 cytosolic prostaglandin-E synthase [EC:5.3.99.3] | (RefSeq) uncharacterized protein OsI_027940-like (A)	uncharacterized protein At3g03773-like isoform X1 [Chenopodium quinoa]	RecName: Full=Uncharacterized protein OsI_027940;	SubName: Full=Uncharacterized protein {ECO:0000313|EMBL:KNA20957.1};	HSP90 co-chaperone p23	GO:0005829,cytosol; GO:0005634,nucleus; GO:0005886,plasma membrane; GO:0009506,plasmodesma; GO:0080037,negative regulation of cytokinin-activated signaling pathway; GO:0010628,positive regulation of gene expression; GO:2000012,regulation of auxin polar transport; GO:0010449,root meristem growth	CS domain
gene-LOC110682672	0.81	0.45	2.33	0	0.02	0	33	18	94	0	1	0	0.009	-6.799	1.19947e-06	3.46787e-05	down	NW_018743575.1	684570	687212	+	LOC110682672	--	--	uncharacterized protein LOC110682672 [Chenopodium quinoa]	--	SubName: Full=Uncharacterized protein {ECO:0000313|EMBL:KZM83783.1};	--	--	--
gene-LOC110682711	3.86	2.32	6.2	2.63	1.5	1.31	232	137	366	150	96	72	0.492	-1.022	0.00556727	0.0395511	down	NW_018743591.1	883845	901955	+	LOC110682711	--	K14552 NET1-associated nuclear protein 1 (U3 small nucleolar RNA-associated protein 17) | (RefSeq) WD repeat-containing protein 75-like (A)	WD repeat-containing protein 75-like [Chenopodium quinoa]	--	SubName: Full=Uncharacterized protein {ECO:0000313|EMBL:KNA25055.1};	WD40 repeat protein	--	WD domain, G-beta repeat
gene-LOC110682720	0.24	0.12	0.31	0	0	0	8	4	10	0	0	0	0.029	-5.12	0.0042251	0.0324875	down	NW_018743593.1	1109971	1113823	-	LOC110682720	--	K00679 phospholipid:diacylglycerol acyltransferase [EC:2.3.1.158] | (RefSeq) hypothetical protein (A)	GDSL esterase/lipase At1g71691-like [Chenopodium quinoa]	RecName: Full=GDSL esterase/lipase At1g71691; EC=3.1.1.-; AltName: Full=Extracellular lipase At1g71691; Flags: Precursor;	SubName: Full=Uncharacterized protein {ECO:0000313|EMBL:KNA25329.1};	--	GO:0005576,extracellular region; GO:0016788,hydrolase activity, acting on ester bonds; GO:0016042,lipid catabolic process	GDSL-like Lipase/Acylhydrolase
gene-LOC110682803	6.72	5.51	10.77	0.06	0	0	227	183	358	2	0	0	0.003	-8.405	4.80696e-15	6.45897e-13	down	NW_018743593.1	3182145	3183903	+	LOC110682803	--	--	--	--	--	--	--	--
gene-LOC110682883	4.12	4.4	5.32	1.88	1.57	1.37	240	252	305	104	98	73	0.379	-1.399	1.88619e-08	7.83725e-07	down	NW_018743608.1	475677	478594	-	LOC110682883	--	K17964 leucine-rich PPR motif-containing protein, mitochondrial | (RefSeq) hypothetical protein (A)	pentatricopeptide repeat-containing protein At1g79080, chloroplastic-like [Chenopodium quinoa]	RecName: Full=Pentatricopeptide repeat-containing protein At1g79080, chloroplastic; Flags: Precursor;	SubName: Full=Uncharacterized protein {ECO:0000313|EMBL:KNA09301.1};	FOG: PPR repeat	GO:0009507,chloroplast; GO:0043231,intracellular membrane-bounded organelle; GO:0004519,endonuclease activity; GO:0003723,RNA binding; GO:0009451,RNA modification	PPR repeat family
gene-LOC110682884	109.99	39.8	146.89	34.76	41.76	10.29	5049	1795	6634	1515	2050	433	0.337	-1.571	0.00454133	0.0341628	down	NW_018743608.1	509410	512447	+	LOC110682884	--	K03283 heat shock 70kDa protein 1/2/6/8 | (RefSeq) probable mediator of RNA polymerase II transcription subunit 37c (A)	probable mediator of RNA polymerase II transcription subunit 37c [Chenopodium quinoa]	RecName: Full=Probable mediator of RNA polymerase II transcription subunit 37c; AltName: Full=Heat shock 70 kDa protein 4; AltName: Full=Heat shock cognate 70 kDa protein 4; AltName: Full=Heat shock cognate protein 70-4; Short=AtHsc70-4; AltName: Full=Heat shock protein 70-4; Short=AtHsp70-4;	SubName: Full=Heat shock protein 70 {ECO:0000313|EMBL:AOZ81417.1};	Molecular chaperones HSP70/HSC70, HSP70 superfamily	GO:0048046,apoplast; GO:0005618,cell wall; GO:0005829,cytosol; GO:0005794,Golgi apparatus; GO:0005739,mitochondrion; GO:0005634,nucleus; GO:0005886,plasma membrane; GO:0005774,vacuolar membrane; GO:0005524,ATP binding; GO:0031625,ubiquitin protein ligase binding; GO:0016567,protein ubiquitination; GO:0006355,regulation of transcription, DNA-templated; GO:0009617,response to bacterium; GO:0046686,…	Hsp70 protein
gene-LOC110682944	1.69	0	1.83	0.04	0	0	46	0	49	1	0	0	0.014	-6.201	0.00127398	0.0133116	down	NW_018743616.1	821794	823154	-	LOC110682944	--	--	auxin-binding protein ABP19a-like [Chenopodium quinoa]	RecName: Full=Auxin-binding protein ABP19a; Flags: Precursor;	SubName: Full=Uncharacterized protein {ECO:0000313|EMBL:KMS96205.1};	--	GO:0048046,apoplast; GO:0005618,cell wall; GO:0030145,manganese ion binding; GO:0045735,nutrient reservoir activity; GO:0009734,auxin-activated signaling pathway	Cupin
gene-LOC110683012	1.26	1.74	1.82	0	0	0	31	42	44	0	0	0	0.005	-7.593	1.11219e-08	4.81401e-07	down	NW_018743616.1	1639665	1641226	+	LOC110683012	--	--	--	--	--	--	--	--
gene-LOC110683028	4.91	2.92	7.55	3.06	1.55	1.47	142	83	215	84	48	39	0.441	-1.181	0.00321308	0.0267249	down	NW_018743616.1	2059064	2063246	+	LOC110683028	--	K15263 cell growth-regulating nucleolar protein | (RefSeq) UBP1-associated proteins 1C-like isoform X1 (A)	UBP1-associated proteins 1C-like isoform X1 [Chenopodium quinoa]	RecName: Full=UBP1-associated proteins 1C;	SubName: Full=Uncharacterized protein {ECO:0000313|EMBL:KNA09822.1};	Cell growth-regulating nucleolar protein	GO:0005634,nucleus; GO:0003723,RNA binding; GO:0008270,zinc ion binding	LYAR-type C2HC zinc finger
gene-LOC110683032	15.2	14.01	12.55	7.37	5.55	6.61	517	468	420	238	202	206	0.498	-1.007	0.000440568	0.00572616	down	NW_018743616.1	2148337	2161410	+	LOC110683032	--	K20603 mitogen-activated protein kinase kinase 2 [EC:2.7.12.2] | (RefSeq) LOW QUALITY PROTEIN: mitogen-activated protein kinase kinase 2-like (A)	LOW QUALITY PROTEIN: mitogen-activated protein kinase kinase 2-like [Chenopodium quinoa]	RecName: Full=Mitogen-activated protein kinase kinase 2; Short=AtMAP2Kbeta; Short=AtMKK2; Short=MAP kinase kinase 2; EC=2.7.12.2 {ECO:0000269|PubMed:15225555};	SubName: Full=Mitogen activated protein kinase kinase {ECO:0000313|EMBL:AFR11233.1};	Mitogen-activated protein kinase kinase (MAP2K)	GO:0005737,cytoplasm; GO:0005886,plasma membrane; GO:0005524,ATP binding; GO:0004708,MAP kinase kinase activity; GO:0004674,protein serine/threonine kinase activity; GO:0060918,auxin transport; GO:0009631,cold acclimation; GO:0009814,defense response, incompatible interaction; GO:0007346,regulation of mitotic cell cycle; GO:0009409,response to cold; GO:0009651,response to salt stress; GO:0031098,…	Protein kinase domain
gene-LOC110683053	1.07	0.68	1.56	0	0	0	61	38	87	0	0	0	0.003	-8.2	1.97841e-10	1.19004e-08	down	NW_018743616.1	2720512	2725983	+	LOC110683053	--	K15446 tRNA:m4X modification enzyme [EC:2.1.1.225] | (RefSeq) tRNA:m(4)X modification enzyme TRM13 homolog (A)	uncharacterized protein LOC110683053 isoform X1 [Chenopodium quinoa]	RecName: Full=tRNA:m(4)X modification enzyme TRM13 {ECO:0000305}; EC=2.1.1.225 {ECO:0000305|PubMed:28369540}; AltName: Full=tRNA methylase 13 {ECO:0000305}; Short=OsTRM13 {ECO:0000303|PubMed:28369540};	SubName: Full=Uncharacterized protein {ECO:0000313|EMBL:KNA19593.1};	Uncharacterized conserved protein	GO:0005737,cytoplasm; GO:0005634,nucleus; GO:0046872,metal ion binding; GO:0008175,tRNA methyltransferase activity; GO:0009651,response to salt stress; GO:0030488,tRNA methylation	Methyltransferase TRM13
gene-LOC110683088	4.52	3.13	7.81	3.27	1.48	1.15	240	163	408	165	84	56	0.424	-1.239	0.00384937	0.0303481	down	NW_018743616.1	3471175	3473830	+	LOC110683088	--	K17964 leucine-rich PPR motif-containing protein, mitochondrial | (RefSeq) pentatricopeptide repeat-containing protein At5g61990, mitochondrial (A)	pentatricopeptide repeat-containing protein At2g37230-like [Chenopodium quinoa]	RecName: Full=Pentatricopeptide repeat-containing protein At2g37230;	SubName: Full=Uncharacterized protein {ECO:0000313|EMBL:KNA18800.1};	FOG: PPR repeat	GO:0009534,chloroplast thylakoid; GO:0009535,chloroplast thylakoid membrane; GO:0043231,intracellular membrane-bounded organelle; GO:0004519,endonuclease activity; GO:0003729,mRNA binding; GO:0003723,RNA binding; GO:0009409,response to cold; GO:0009451,RNA modification	PPR repeat family
gene-LOC110683158	1.35	0.82	1.55	0.53	0.19	0.44	54	32	61	20	8	16	0.338	-1.565	0.00265838	0.0231849	down	NW_018743623.1	173487	180410	-	LOC110683158	--	--	LOW QUALITY PROTEIN: probable transcriptional regulatory protein At2g25830 [Chenopodium quinoa]	RecName: Full=Probable transcriptional regulatory protein At2g25830;	SubName: Full=Uncharacterized protein {ECO:0000313|EMBL:EMJ23890.1};	Uncharacterized conserved protein	GO:0009507,chloroplast	Transcriptional regulator
gene-LOC110683177	1.53	0.78	1.13	0	0	0	18	9	13	0	0	0	0.015	-6.032	0.000104075	0.00173721	down	NW_018743623.1	567969	569716	+	LOC110683177	--	--	--	--	--	--	--	--
gene-LOC110683191	1.41	1.32	2.28	0.91	0.52	0.49	91	84	145	56	36	29	0.422	-1.243	0.000423003	0.00555585	down	NW_018743623.1	861779	866062	+	LOC110683191	--	--	--	--	--	--	--	--
gene-LOC110683193	6.45	7.74	5.12	2.88	2.51	2.93	151	178	118	64	63	63	0.454	-1.139	0.00381049	0.0301434	down	NW_018743623.1	923217	928786	-	LOC110683193	--	--	EEF1A lysine methyltransferase 1-like [Chenopodium quinoa]	--	RecName: Full=Protein-lysine N-methyltransferase SOVF_118840 {ECO:0000256|HAMAP-Rule:MF_03187}; EC=2.1.1.- {ECO:0000256|HAMAP-Rule:MF_03187};	Uncharacterized conserved protein	GO:0005737,cytoplasm; GO:0003676,nucleic acid binding; GO:0016279,protein-lysine N-methyltransferase activity	Probable N6-adenine methyltransferase
gene-LOC110683216	0.41	0.28	0.28	0	0	0	12	8	8	0	0	0	0.021	-5.541	0.00088337	0.0100357	down	NW_018742263.1	6753529	6755311	+	LOC110683216	--	--	uncharacterized protein LOC110683216 [Chenopodium quinoa]	--	SubName: Full=Uncharacterized protein {ECO:0000313|EMBL:KNA03285.1}; Flags: Fragment;	--	--	Plant transposase (Ptta/En/Spm family)
gene-LOC110683225	1.91	1.7	1.3	0	0	0	78	68	52	0	0	0	0.003	-8.384	1.40085e-10	8.60648e-09	down	NW_018742263.1	6778078	6780906	+	LOC110683225	--	--	--	--	--	--	--	--
gene-LOC110683230	0.36	0.73	0.67	0	0	0	6	12	11	0	0	0	0.021	-5.59	0.000837864	0.00960913	down	NW_018743636.1	50476	51309	+	LOC110683230	--	K15121 solute carrier family 25, member 44 | (RefSeq) uncharacterized protein LOC112037286 (A)	uncharacterized protein LOC110683230 [Chenopodium quinoa]	--	SubName: Full=Uncharacterized protein {ECO:0000313|EMBL:KNA11865.1};	--	GO:0016021,integral component of membrane	Domain of unknown function
gene-LOC110683232	3.3	2.86	3.48	0	0	0	27	23	28	0	0	0	0.008	-6.999	3.23297e-07	1.064e-05	down	NW_018742263.1	6914099	6915305	+	LOC110683232	--	--	--	--	--	--	--	--
gene-LOC110683300	1.83	1.04	1.89	0	0	0	61	34	62	0	0	0	0.004	-7.981	8.32117e-10	4.36558e-08	down	NW_018743669.1	2654157	2655919	+	LOC110683300	--	K15255 ATP-dependent DNA helicase PIF1 [EC:3.6.4.12] | (RefSeq) ATP-dependent DNA helicase PIF2-like (A)	ATP-dependent DNA helicase PIF2-like [Chenopodium quinoa]	--	RecName: Full=ATP-dependent DNA helicase {ECO:0000256|RuleBase:RU363044}; EC=3.6.4.12 {ECO:0000256|RuleBase:RU363044};	DNA helicase PIF1/RRM3	GO:0005524,ATP binding; GO:0003678,DNA helicase activity; GO:0006310,DNA recombination; GO:0006281,DNA repair; GO:0000723,telomere maintenance	PIF1-like helicase
gene-LOC110683324	0.56	0.36	0.83	0	0	0	11	7	16	0	0	0	0.019	-5.749	0.000324693	0.00449201	down	NW_018743669.1	2249306	2250370	-	LOC110683324	--	K02218 casein kinase 1 [EC:2.7.11.1] | (RefSeq) uncharacterized protein LOC8069780 (A)	putative nuclease HARBI1 [Chenopodium quinoa]	RecName: Full=Protein ALP1-like {ECO:0000305}; EC=3.1.-.-;	SubName: Full=PIF-like transposase {ECO:0000313|EMBL:ABB83644.1};	Predicted transposase	GO:0005634,nucleus; GO:0046872,metal ion binding; GO:0004518,nuclease activity	DDE superfamily endonuclease
gene-LOC110683330	2.09	1.98	5.02	0	0	0	30	28	71	0	0	0	0.005	-7.648	1.36083e-08	5.76987e-07	down	NW_018743669.1	2653315	2654111	+	LOC110683330	--	K15255 ATP-dependent DNA helicase PIF1 [EC:3.6.4.12] | (RefSeq) uncharacterized protein LOC110712983 (A)	uncharacterized protein LOC110683330 [Chenopodium quinoa]	--	SubName: Full=Uncharacterized protein {ECO:0000313|EnsemblPlants:ORUFI11G24680.1};	DNA helicase PIF1/RRM3	--	--
gene-LOC110683385	0.1	0.1	0.29	0	0	0	7	7	21	0	0	0	0.019	-5.747	0.000509447	0.00644601	down	NW_018743669.1	423949	429725	-	LOC110683385	--	K15333 tRNA guanosine-2'-O-methyltransferase [EC:2.1.1.34] | (RefSeq) uncharacterized protein LOC104224633 (A)	subtilisin-like protease SBT4.3 [Chenopodium quinoa]	RecName: Full=Subtilisin-like protease SBT4.4 {ECO:0000303|PubMed:16193095}; EC=3.4.21.- {ECO:0000255|PROSITE-ProRule:PRU10082}; AltName: Full=Subtilase subfamily 4 member 4 {ECO:0000303|PubMed:16193095}; Short=AtSBT4.4 {ECO:0000303|PubMed:16193095}; Flags: Precursor;	SubName: Full=Uncharacterized protein {ECO:0000313|EMBL:KNA04724.1};	--	GO:0005576,extracellular region; GO:0004252,serine-type endopeptidase activity	Subtilase family
gene-LOC110683389	42.16	34.05	88.65	35.08	21.1	15.65	1472	1168	3045	1163	788	501	0.492	-1.023	0.00442574	0.0335475	down	NW_018743669.1	490022	492311	-	LOC110683389	--	K07375 tubulin beta | (RefSeq) tubulin beta-2 chain-like (A)	tubulin beta-2 chain-like [Chenopodium quinoa]	RecName: Full=Tubulin beta-3 chain;	RecName: Full=Tubulin beta chain {ECO:0000256|RuleBase:RU000352};	Beta tubulin	GO:0005737,cytoplasm; GO:0005874,microtubule; GO:0005525,GTP binding; GO:0003924,GTPase activity; GO:0005200,structural constituent of cytoskeleton; GO:0007017,microtubule-based process	Tubulin/FtsZ family, GTPase domain
gene-LOC110683395	13.62	5.39	51.74	10.24	2.71	2.48	329	128	1230	235	70	55	0.257	-1.961	0.00708433	0.0471204	down	NW_018743669.1	542870	545257	-	LOC110683395	--	K04802 proliferating cell nuclear antigen | (RefSeq) proliferating cell nuclear antigen (A)	proliferating cell nuclear antigen [Chenopodium quinoa]	RecName: Full=Proliferating cell nuclear antigen; Short=PCNA;	RecName: Full=Proliferating cell nuclear antigen {ECO:0000256|RuleBase:RU000641};	DNA polymerase delta processivity factor (proliferating cell nuclear antigen)	GO:0005634,nucleus; GO:0003677,DNA binding; GO:0030337,DNA polymerase processivity factor activity; GO:0006260,DNA replication; GO:0006275,regulation of DNA replication	Proliferating cell nuclear antigen, C-terminal domain
gene-LOC110683402	71.92	86.97	21.19	15.83	24.27	17.74	2225	2643	645	465	803	503	0.327	-1.613	0.00620146	0.0427082	down	NW_018743669.1	605402	608199	+	LOC110683402	--	K00799 glutathione S-transferase [EC:2.5.1.18] | (RefSeq) probable glutathione S-transferase (A)	probable glutathione S-transferase [Chenopodium quinoa]	RecName: Full=Probable glutathione S-transferase; EC=2.5.1.18; AltName: Full=Auxin-induced protein PCNT107;	SubName: Full=Uncharacterized protein {ECO:0000313|EMBL:KNA21418.1};	Glutathione S-transferase	GO:0004364,glutathione transferase activity; GO:0009734,auxin-activated signaling pathway	Glutathione S-transferase, N-terminal domain
gene-LOC110683439	229.36	166.83	226.29	139.76	39.85	43.54	1948	1392	1891	1127	362	339	0.375	-1.415	0.0019568	0.0185002	down	NW_018743669.1	932316	932851	-	LOC110683439	--	--	--	--	--	--	--	--
gene-LOC110683499	208.31	182.13	233.82	150.91	56.85	47.92	2864	2460	3163	1970	836	604	0.431	-1.214	0.00287719	0.0246444	down	NW_018743669.1	1511536	1513337	-	LOC110683499	--	K02908 large subunit ribosomal protein L30e | (RefSeq) 60S ribosomal protein L30 (A)	60S ribosomal protein L30 [Chenopodium quinoa]	RecName: Full=60S ribosomal protein L30;	SubName: Full=Uncharacterized protein {ECO:0000313|EMBL:KNA16188.1}; Flags: Fragment;	60S ribosomal protein L30	GO:0005840,ribosome; GO:0003735,structural constituent of ribosome; GO:0006412,translation	Ribosomal protein L7Ae/L30e/S12e/Gadd45 family
gene-LOC110683565	0.28	0.29	0.39	0.09	0	0	14	14	19	4	0	0	0.091	-3.455	0.00525025	0.0378518	down	NW_018743669.1	2205479	2207938	+	LOC110683565	--	K10260 F-box and WD-40 domain protein 7 | (RefSeq) predicted protein (A)	E3 ubiquitin-protein ligase PUB23-like [Chenopodium quinoa]	RecName: Full=E3 ubiquitin-protein ligase PUB23; EC=2.3.2.27; AltName: Full=Plant U-box protein 23; AltName: Full=RING-type E3 ubiquitin transferase PUB23 {ECO:0000305}; AltName: Full=U-box domain-containing protein 23;	RecName: Full=RING-type E3 ubiquitin transferase {ECO:0000256|SAAS:SAAS00702733}; EC=2.3.2.27 {ECO:0000256|SAAS:SAAS00702733};	--	GO:0005829,cytosol; GO:0004842,ubiquitin-protein transferase activity; GO:0006952,defense response; GO:0051865,protein autoubiquitination; GO:0016567,protein ubiquitination; GO:0010200,response to chitin; GO:0009414,response to water deprivation	U-box domain
gene-LOC110683569	17.51	13.75	23.95	0	0	0	512	395	689	0	0	0	0	-11.321	6.96441e-21	2.08119e-18	down	NW_018743669.1	2252608	2255668	-	LOC110683569	--	K13484 5-hydroxyisourate hydrolase / 2-oxo-4-hydroxy-4-carboxy-5-ureidoimidazoline decarboxylase [EC:3.5.2.17 4.1.1.97] | (RefSeq) L10-interacting MYB domain-containing protein-like (A)	L10-interacting MYB domain-containing protein-like [Chenopodium quinoa]	RecName: Full=L10-interacting MYB domain-containing protein {ECO:0000303|PubMed:25707794};	SubName: Full=Uncharacterized protein {ECO:0000313|EMBL:KNA13501.1};	--	GO:0005634,nucleus; GO:0006355,regulation of transcription, DNA-templated; GO:0006351,transcription, DNA-templated	Myb/SANT-like DNA-binding domain
gene-LOC110683577	0.17	0.35	0.9	0.1	0.02	0.03	7	14	36	4	1	1	0.122	-3.039	0.00411933	0.0319689	down	NW_018743669.1	2344727	2347097	+	LOC110683577	--	K03452 magnesium/proton exchanger | (RefSeq) pentatricopeptide repeat-containing protein At3g62890-like (A)	pentatricopeptide repeat-containing protein At1g05750, chloroplastic-like [Chenopodium quinoa]	RecName: Full=Pentatricopeptide repeat-containing protein At1g05750, chloroplastic; AltName: Full=Protein PIGMENT DEFECTIVE 247; Flags: Precursor;	SubName: Full=Uncharacterized protein {ECO:0000313|EMBL:KNA03178.1};	FOG: PPR repeat	GO:0009507,chloroplast; GO:0004519,endonuclease activity; GO:0003723,RNA binding; GO:0009451,RNA modification	PPR repeat family
gene-LOC110683625	0.86	0.45	1.19	0.32	0.05	0.18	31	16	42	11	2	6	0.243	-2.04	0.00580738	0.0407608	down	NW_018742263.1	339938	342025	+	LOC110683625	--	--	--	--	--	--	--	--
gene-LOC110683686	0.07	0.03	0.26	0	0	0	7	3	24	0	0	0	0.02	-5.642	0.00173436	0.0168976	down	NW_018743691.1	3626172	3633086	-	LOC110683686	--	--	--	--	--	--	--	--
gene-LOC110683697	0.44	0.27	1.08	0.05	0	0	10	6	24	1	0	0	0.032	-4.968	0.00136927	0.0140627	down	NW_018743691.1	229245	230743	-	LOC110683697	--	--	--	--	--	--	--	--
gene-LOC110683722	70.28	49.18	73.06	41.95	16.82	12.82	1184	814	1211	671	303	198	0.394	-1.342	0.00128378	0.0133839	down	NW_018743691.1	1607468	1610233	-	LOC110683722	--	K02953 small subunit ribosomal protein S13e | (RefSeq) 40S ribosomal protein S13 (A)	40S ribosomal protein S13 [Chenopodium quinoa]	RecName: Full=40S ribosomal protein S13;	SubName: Full=Uncharacterized protein {ECO:0000313|EMBL:KNA15977.1};	40S ribosomal protein S13	GO:0022627,cytosolic small ribosomal subunit; GO:0005730,nucleolus; GO:0070181,small ribosomal subunit rRNA binding; GO:0003735,structural constituent of ribosome; GO:0006412,translation	Ribosomal S13/S15 N-terminal domain
gene-LOC110683725	133.83	104.53	183.37	81.01	31.16	33.64	4461	3423	6014	2564	1111	1028	0.373	-1.421	7.66201e-05	0.00134432	down	NW_018743691.1	1654034	1656734	+	LOC110683725	--	K03231 elongation factor 1-alpha | (RefSeq) elongation factor 1-alpha (A)	elongation factor 1-alpha [Chenopodium quinoa]	RecName: Full=Elongation factor 1-alpha; Short=EF-1-alpha;	RecName: Full=Elongation factor 1-alpha {ECO:0000256|RuleBase:RU000325};	Translation elongation factor EF-1 alpha/Tu	GO:0005737,cytoplasm; GO:0005525,GTP binding; GO:0003924,GTPase activity; GO:0003746,translation elongation factor activity	Elongation factor Tu GTP binding domain
gene-LOC110683728	5.94	4.3	6.98	1.95	0.43	0.72	90	64	104	28	7	10	0.192	-2.384	1.34606e-05	0.000298402	down	NW_018743691.1	2026426	2027333	-	LOC110683728	--	--	--	--	--	--	--	--
gene-LOC110683731	253.69	197.08	270.81	187.58	75.76	61.48	8867	6767	9313	6225	2832	1970	0.476	-1.071	0.00648072	0.0441834	down	NW_018743691.1	2097663	2100528	+	LOC110683731	--	K03231 elongation factor 1-alpha | (RefSeq) elongation factor 1-alpha (A)	elongation factor 1-alpha [Chenopodium quinoa]	RecName: Full=Elongation factor 1-alpha; Short=EF-1-alpha;	RecName: Full=Elongation factor 1-alpha {ECO:0000256|RuleBase:RU000325};	Translation elongation factor EF-1 alpha/Tu	GO:0005737,cytoplasm; GO:0005525,GTP binding; GO:0003924,GTPase activity; GO:0003746,translation elongation factor activity	Elongation factor Tu GTP binding domain
gene-LOC110683769	1.24	0.78	2.77	0.05	0.01	0.04	102	63	225	4	1	3	0.024	-5.366	9.58414e-14	1.01418e-11	down	NW_018743691.1	2998818	3005674	-	LOC110683769	--	K01303 acylaminoacyl-peptidase [EC:3.4.19.1] | (RefSeq) uncharacterized LOC101311565 (A)	uncharacterized protein LOC110683769 [Chenopodium quinoa]	RecName: Full=RNA-directed DNA polymerase homolog; EC=2.7.7.48; AltName: Full=Reverse transcriptase homolog;	SubName: Full=Uncharacterized protein {ECO:0000313|EMBL:CAN65719.1};	FOG: Transposon-encoded proteins with TYA, reverse transcriptase, integrase domains in various combinations	GO:0005739,mitochondrion; GO:0003968,RNA-directed 5'-3' RNA polymerase activity; GO:0003964,RNA-directed DNA polymerase activity	Reverse transcriptase (RNA-dependent DNA polymerase)
gene-LOC110683773	0.7	0.11	2.8	0.25	0.08	0.01	52	8	205	18	6	1	0.114	-3.13	0.00380467	0.0301211	down	NW_018743691.1	3045365	3052896	+	LOC110683773	--	--	TORTIFOLIA1-like protein 2 isoform X1 [Chenopodium quinoa]	RecName: Full=TORTIFOLIA1-like protein 2 {ECO:0000303|PubMed:15324671};	SubName: Full=Uncharacterized protein {ECO:0000313|EMBL:KNA11318.1};	--	GO:0005874,microtubule; GO:0008017,microtubule binding	HEAT repeat
gene-LOC110683793	6.84	8.87	10.17	1.97	2.84	1.62	106	135	155	29	47	23	0.274	-1.866	2.19042e-06	5.93335e-05	down	NW_018743691.1	3683323	3684912	+	LOC110683793	--	--	--	--	--	--	--	--
gene-LOC110683801	3.71	3.71	5.82	0	0	0	380	373	586	0	0	0	0	-11.073	5.6721e-20	1.56945e-17	down	NW_018743691.1	3798707	3805658	-	LOC110683801	--	K07466 replication factor A1 | (RefSeq) uncharacterized protein LOC109229888 (A)	uncharacterized protein LOC110683801 [Chenopodium quinoa]	--	SubName: Full=Uncharacterized protein {ECO:0000313|EMBL:KNA06089.1}; Flags: Fragment;	--	--	Replication factor-A C terminal domain
gene-LOC110683802	2.03	1.71	4.03	0	0	0	120	99	234	0	0	0	0.001	-9.47	3.96966e-14	4.59079e-12	down	NW_018743691.1	3806244	3811416	-	LOC110683802	--	K15255 ATP-dependent DNA helicase PIF1 [EC:3.6.4.12] | (RefSeq) uncharacterized protein LOC107022360 (A)	uncharacterized protein LOC110683802 isoform X1 [Chenopodium quinoa]	--	SubName: Full=uncharacterized protein LOC108984871 {ECO:0000313|RefSeq:XP_018812501.1};	DNA helicase PIF1/RRM3	--	Helitron helicase-like domain at N-terminus
gene-LOC110683908	2.27	0.89	7.13	0.92	0.65	0.48	88	34	272	34	27	17	0.24	-2.056	0.00155554	0.0155695	down	NW_018742263.1	5198825	5202448	+	LOC110683908	--	K20720 reticulon-4 | (RefSeq) reticulon-like protein B21 (A)	reticulon-like protein B17 isoform X1 [Chenopodium quinoa]	RecName: Full=Reticulon-like protein B18; Short=AtRTNLB18;	RecName: Full=Reticulon-like protein {ECO:0000256|RuleBase:RU363132};	--	GO:0005789,endoplasmic reticulum membrane; GO:0016021,integral component of membrane	Reticulon
gene-LOC110683920	14.38	7.12	17.84	7.49	3.95	4.54	259	126	316	128	76	75	0.451	-1.148	0.00161312	0.0159916	down	NW_018742263.1	5288771	5291933	-	LOC110683920	--	K07466 replication factor A1 | (RefSeq) hypothetical protein (A)	uncharacterized protein At4g28440-like [Chenopodium quinoa]	RecName: Full=Uncharacterized protein At4g28440;	SubName: Full=Uncharacterized protein {ECO:0000313|EMBL:KMS96367.1};	--	GO:0005829,cytosol; GO:0003729,mRNA binding	--
gene-LOC110683921	1.76	1.34	4.33	0.5	0.09	0.3	52	39	126	14	3	8	0.135	-2.89	1.05281e-05	0.000238778	down	NW_018743691.1	4306034	4307512	-	LOC110683921	--	K11843 ubiquitin carboxyl-terminal hydrolase 14 [EC:3.4.19.12] | (RefSeq) FBD-associated F-box protein At4g10400-like (A)	F-box/FBD/LRR-repeat protein At5g22660-like [Chenopodium quinoa]	RecName: Full=F-box/FBD/LRR-repeat protein At1g16930;	SubName: Full=Uncharacterized protein {ECO:0000313|EMBL:KNA19781.1};	--	--	FBD
gene-LOC110683926	0.42	0.64	0.35	0	0	0	6	9	5	0	0	0	0.029	-5.099	0.00536064	0.0384267	down	NW_018743691.1	4633427	4634591	-	LOC110683926	--	K05349 beta-glucosidase [EC:3.2.1.21] | (RefSeq) probable beta-glucosidase F (A)	uncharacterized protein LOC110683926 [Chenopodium quinoa]	--	SubName: Full=Uncharacterized protein {ECO:0000313|EMBL:KNA22414.1};	--	--	--
gene-LOC110683929	7.13	5.91	4.85	1.86	0.76	2	97	79	65	24	11	25	0.27	-1.887	0.000274158	0.0039064	down	NW_018742263.1	5370421	5373910	-	LOC110683929	--	--	--	--	--	--	--	--
gene-LOC110683969	1.53	0.34	3.02	0.3	0	0	32	7	62	6	0	0	0.068	-3.871	0.00313805	0.0262822	down	NW_018743697.1	3449438	3450482	+	LOC110683969	--	K09286 EREBP-like factor | (RefSeq) dehydration-responsive element-binding protein 1B-like (A)	dehydration-responsive element-binding protein 1F-like [Chenopodium quinoa]	RecName: Full=Dehydration-responsive element-binding protein 1F; Short=Protein DREB1F; AltName: Full=Protein C-repeat-binding factor 2; Short=rCBF2;	SubName: Full=Uncharacterized protein {ECO:0000313|EMBL:KNA05652.1};	--	GO:0005634,nucleus; GO:0003677,DNA binding; GO:0003700,DNA-binding transcription factor activity; GO:0006351,transcription, DNA-templated	AP2 domain
gene-LOC110683983	2.21	4.46	5.46	1.38	1.06	1.53	49	97	119	29	25	31	0.359	-1.478	0.0013621	0.0140126	down	NW_018743697.1	4964244	4965351	-	LOC110683983	--	K07441 beta-1,4-N-acetylglucosaminyltransferase [EC:2.4.1.141] | (RefSeq) UDP-N-acetylglucosamine transferase subunit ALG14 homolog (A)	auxin-responsive protein SAUR41-like [Chenopodium quinoa]	RecName: Full=Auxin-responsive protein SAUR41 {ECO:0000305}; AltName: Full=Protein SMALL AUXIN UP RNA 41 {ECO:0000303|PubMed:12036261};	SubName: Full=Uncharacterized protein {ECO:0000313|EMBL:KNA03323.1};	--	GO:0005737,cytoplasm; GO:0060918,auxin transport; GO:0009734,auxin-activated signaling pathway; GO:0009958,positive gravitropism; GO:0040008,regulation of growth; GO:0090057,root radial pattern formation	Auxin responsive protein
gene-LOC110684005	3.43	0.93	10.08	1.58	0.86	0.44	206	55	595	90	55	24	0.238	-2.074	0.00339363	0.0277403	down	NW_018743697.1	369048	374470	+	LOC110684005	--	--	--	--	--	--	--	--
gene-LOC110684012	6.29	5.46	8.5	0.14	0.1	0.03	245	209	326	5	4	1	0.014	-6.13	5.66229e-30	4.06749e-27	down	NW_018742263.1	6372494	6376047	+	LOC110684012	--	--	--	--	--	--	--	--
gene-LOC110684081	3.35	3.72	5.39	2.11	0.97	2	146	159	231	87	45	80	0.445	-1.168	0.00124164	0.0130643	down	NW_018743697.1	1370814	1372991	-	LOC110684081	--	--	uncharacterized protein LOC110684081 [Chenopodium quinoa]	--	SubName: Full=Uncharacterized protein {ECO:0000313|EMBL:KNA21061.1};	--	GO:0016021,integral component of membrane	--
gene-LOC110684104	175.72	37.06	625.6	92.81	20.51	16.35	2732	566	9570	1370	341	233	0.182	-2.456	0.00275631	0.0238497	down	NW_018743697.1	1616575	1617506	+	LOC110684104	--	K11251 histone H2A | (RefSeq) histone H2A-like (A)	histone H2A-like [Chenopodium quinoa]	RecName: Full=Histone H2A;	RecName: Full=Histone H2A {ECO:0000256|RuleBase:RU003767};	Histone 2A	GO:0000786,nucleosome; GO:0005634,nucleus; GO:0003677,DNA binding; GO:0046982,protein heterodimerization activity	C-terminus of histone H2A
gene-LOC110684106	151.84	67.22	370.87	87.99	37.74	46.04	3626	1577	8714	1995	964	1008	0.34	-1.558	0.00185408	0.0177219	down	NW_018743697.1	1627120	1631360	-	LOC110684106	--	K11252 histone H2B | (RefSeq) probable histone H2B.1 (A)	PREDICTED: probable histone H2B.1 isoform X1 [Beta vulgaris subsp. vulgaris]	RecName: Full=Probable histone H2B.1;	RecName: Full=Histone H2B {ECO:0000256|RuleBase:RU000451};	Histone H2B	GO:0000786,nucleosome; GO:0005634,nucleus; GO:0003677,DNA binding; GO:0046982,protein heterodimerization activity	Core histone H2A/H2B/H3/H4
gene-LOC110684107	144.47	125.84	137.33	102.96	47.02	40.89	2301	1969	2152	1557	801	597	0.491	-1.025	0.00421388	0.0324346	down	NW_018743697.1	1643277	1645306	+	LOC110684107	--	K02957 small subunit ribosomal protein S15Ae | (RefSeq) 40S ribosomal protein S15a-1-like (A)	40S ribosomal protein S15a-1-like [Chenopodium quinoa]	RecName: Full=40S ribosomal protein S15a-1;	SubName: Full=Uncharacterized protein {ECO:0000313|EnsemblPlants:OGLUM07G06670.2};	40S ribosomal protein S15/S22	GO:0005618,cell wall; GO:0005829,cytosol; GO:0022626,cytosolic ribosome; GO:0022627,cytosolic small ribosomal subunit; GO:0016020,membrane; GO:0005886,plasma membrane; GO:0009506,plasmodesma; GO:0042788,polysomal ribosome; GO:0005774,vacuolar membrane; GO:0003735,structural constituent of ribosome; GO:0006412,translation	Ribosomal protein S8
gene-LOC110684110	0.73	0.56	2.4	0.4	0.24	0.28	37	28	119	19	13	13	0.292	-1.774	0.00321131	0.0267221	down	NW_018743697.1	1665218	1667744	+	LOC110684110	--	K03452 magnesium/proton exchanger | (RefSeq) uncharacterized LOC18613571 (A)	pentatricopeptide repeat-containing protein At5g66520-like isoform X1 [Chenopodium quinoa]	RecName: Full=Pentatricopeptide repeat-containing protein At5g66520;	SubName: Full=Uncharacterized protein {ECO:0000313|EMBL:KNA11900.1};	FOG: PPR repeat	GO:0009507,chloroplast; GO:0004519,endonuclease activity; GO:0003723,RNA binding; GO:0008270,zinc ion binding; GO:1900865,chloroplast RNA modification; GO:0016554,cytidine to uridine editing	PPR repeat
gene-LOC110684168	162.04	118.28	173.9	113.98	45.22	45	3005	2155	3173	2007	897	765	0.479	-1.063	0.00366061	0.0292426	down	NW_018743697.1	2229048	2231292	-	LOC110684168	--	K02872 large subunit ribosomal protein L13Ae | (RefSeq) 60S ribosomal protein L13a-4-like (A)	60S ribosomal protein L13a-4-like [Chenopodium quinoa]	RecName: Full=60S ribosomal protein L13a-4;	SubName: Full=Uncharacterized protein {ECO:0000313|EMBL:KNA23023.1};	60S ribosomal protein L13a	GO:0022625,cytosolic large ribosomal subunit; GO:0022626,cytosolic ribosome; GO:0003729,mRNA binding; GO:0003735,structural constituent of ribosome; GO:0006412,translation	Ribosomal protein L13
gene-LOC110684212	4.63	1.77	0.9	0.41	0.07	0.25	120	45	23	10	2	6	0.1	-3.316	0.000127649	0.002067	down	NW_018743697.1	2573468	2575465	+	LOC110684212	--	K00430 peroxidase [EC:1.11.1.7] | (RefSeq) peroxidase P7-like (A)	peroxidase P7-like [Chenopodium quinoa]	RecName: Full=Peroxidase 4 {ECO:0000250|UniProtKB:Q42578}; EC=1.11.1.7; Flags: Precursor;	RecName: Full=Peroxidase {ECO:0000256|RuleBase:RU362060, ECO:0000256|SAAS:SAAS00709852}; EC=1.11.1.7 {ECO:0000256|RuleBase:RU362060, ECO:0000256|SAAS:SAAS00709852}; Flags: Fragment;	--	GO:0005576,extracellular region; GO:0020037,heme binding; GO:0046872,metal ion binding; GO:0004601,peroxidase activity; GO:0042744,hydrogen peroxide catabolic process; GO:0006979,response to oxidative stress	Peroxidase
gene-LOC110684244	243.55	197.28	254.64	167.78	78.04	70.41	4984	3966	5127	3260	1708	1321	0.483	-1.051	0.00159195	0.015812	down	NW_018743697.1	2930115	2932887	-	LOC110684244	--	K02865 large subunit ribosomal protein L10Ae | (RefSeq) 60S ribosomal protein L10a (A)	60S ribosomal protein L10a [Chenopodium quinoa]	RecName: Full=60S ribosomal protein L10a {ECO:0000303|PubMed:21205822};	RecName: Full=Ribosomal protein {ECO:0000256|RuleBase:RU000659};	60S ribosomal protein L10A	GO:0022625,cytosolic large ribosomal subunit; GO:0003723,RNA binding; GO:0003735,structural constituent of ribosome; GO:0000470,maturation of LSU-rRNA; GO:0006412,translation	Ribosomal protein L1p/L10e family
gene-LOC110684267	12.85	12.77	7.08	3.47	1.5	3.84	168	164	91	43	21	46	0.277	-1.852	0.0004859	0.006201	down	NW_018742271.1	450360	451013	+	LOC110684267	--	K16465 centrin-1 | (RefSeq) calcium-binding protein PBP1-like (A)	calcium-binding protein PBP1-like [Chenopodium quinoa]	RecName: Full=Calcium-binding protein PBP1; AltName: Full=KIC-related protein 2; AltName: Full=PINOID-binding protein 1;	SubName: Full=Uncharacterized protein {ECO:0000313|EMBL:KMS98389.1};	Ca2+-binding protein (centrin/caltractin), EF-Hand superfamily protein	GO:0005509,calcium ion binding; GO:0009733,response to auxin	EF-hand domain pair
gene-LOC110684281	420.36	294.87	386.84	245.85	114.37	106.69	6292	4336	5697	3494	1831	1464	0.449	-1.154	0.000668374	0.00802005	down	NW_018743697.1	3333663	3335823	+	LOC110684281	--	K02943 large subunit ribosomal protein LP2 | (RefSeq) 60S acidic ribosomal protein P2-4-like (A)	60S acidic ribosomal protein P2-4-like [Chenopodium quinoa]	RecName: Full=60S acidic ribosomal protein P2;	SubName: Full=60S acidic ribosomal protein P2-2-like {ECO:0000313|RefSeq:XP_016578631.1};	60S acidic ribosomal protein P2	GO:0005840,ribosome; GO:0003735,structural constituent of ribosome; GO:0006414,translational elongation	60s Acidic ribosomal protein
gene-LOC110684313	75.79	26.88	276	30.51	8.01	4.48	3432	1196	12297	1312	388	186	0.133	-2.912	0.00014181	0.00225412	down	NW_018743697.1	3609975	3615470	+	LOC110684313	--	K15403 fatty acid omega-hydroxy dehydrogenase [EC:1.1.-.-] | (RefSeq) protein HOTHEAD-like (A)	protein HOTHEAD-like [Chenopodium quinoa]	RecName: Full=Protein HOTHEAD; AltName: Full=Protein ADHESION OF CALYX EDGES; Flags: Precursor;	SubName: Full=Uncharacterized protein {ECO:0000313|EMBL:KNA09388.1};	Glucose dehydrogenase/choline dehydrogenase/mandelonitrile lyase (GMC oxidoreductase family)	GO:0005576,extracellular region; GO:0050660,flavin adenine dinucleotide binding; GO:0046593,mandelonitrile lyase activity; GO:0016614,oxidoreductase activity, acting on CH-OH group of donors; GO:0007267,cell-cell signaling; GO:0009553,embryo sac development; GO:0010430,fatty acid omega-oxidation	GMC oxidoreductase
gene-LOC110684329	0.18	0.55	0.6	0.05	0.02	0.05	8	24	26	2	1	2	0.096	-3.388	0.000886567	0.0100598	down	NW_018743697.1	3794442	3798375	+	LOC110684329	--	--	--	--	--	--	--	--
gene-LOC110684350	3.8	2.31	5.09	0	0	0	266	159	350	0	0	0	0.001	-10.263	7.84879e-17	1.35733e-14	down	NW_018743697.1	4000926	4006221	+	LOC110684350	--	K02218 casein kinase 1 [EC:2.7.11.1] | (RefSeq) uncharacterized protein LOC8069780 (A)	putative nuclease HARBI1 isoform X1 [Chenopodium quinoa]	RecName: Full=Protein ALP1-like {ECO:0000305}; EC=3.1.-.-;	SubName: Full=Uncharacterized protein {ECO:0000313|EnsemblPlants:TRIAE_CS42_3DS_TGACv1_271976_AA0912150.1};	Predicted transposase	GO:0005634,nucleus; GO:0046872,metal ion binding; GO:0004518,nuclease activity	DDE superfamily endonuclease
gene-LOC110684361	2.66	2.46	4.94	2.18	0.93	1.01	121	110	221	94	45	42	0.45	-1.152	0.00384805	0.0303481	down	NW_018743697.1	4190482	4196084	+	LOC110684361	--	K06630 14-3-3 protein epsilon | (RefSeq) uncharacterized protein LOC110789589 (A)	protein Brevis radix-like 2 [Chenopodium quinoa]	RecName: Full=Protein Brevis radix-like 2; Short=AtBRXL2;	SubName: Full=Uncharacterized protein {ECO:0000313|EMBL:KNA18830.1};	--	GO:0005634,nucleus	Transcription factor regulating root and shoot growth via Pin3
gene-LOC110684571	0.99	0.86	1.97	0.6	0.39	0.56	69	59	135	40	29	36	0.46	-1.119	0.00407935	0.0317493	down	NW_018743722.1	1711542	1717302	+	LOC110684571	--	K01881 prolyl-tRNA synthetase [EC:6.1.1.15] | (RefSeq) proline--tRNA ligase, cytoplasmic-like isoform X1 (A)	protein transport protein SEC23-1-like [Chenopodium quinoa]	RecName: Full=Protein transport protein Sec24-like At3g07100;	SubName: Full=Uncharacterized protein {ECO:0000313|EMBL:KCW46751.1};	Vesicle coat complex COPII, subunit SEC23	GO:0030127,COPII vesicle coat; GO:0005789,endoplasmic reticulum membrane; GO:0033116,endoplasmic reticulum-Golgi intermediate compartment membrane; GO:0000139,Golgi membrane; GO:0008270,zinc ion binding; GO:0007029,endoplasmic reticulum organization; GO:0080119,ER body organization; GO:0006888,ER to Golgi vesicle-mediated transport; GO:0007030,Golgi organization; GO:0006886,intracellular protein …	Sec23/Sec24 trunk domain
gene-LOC110684580	0.65	0.82	0.87	0	0	0	12	15	16	0	0	0	0.014	-6.147	4.57494e-05	0.0008719	down	NW_018743722.1	2663906	2670638	-	LOC110684580	--	--	uncharacterized protein LOC110684580 [Chenopodium quinoa]	--	SubName: Full=Uncharacterized protein {ECO:0000313|EMBL:KNA16564.1};	--	GO:0016021,integral component of membrane	--
gene-LOC110684622	270.92	204.17	290.2	179.16	87.47	72.45	5192	3844	5472	3260	1793	1273	0.473	-1.079	0.0012231	0.0129244	down	NW_018743732.1	31691	34460	+	LOC110684622	--	K02865 large subunit ribosomal protein L10Ae | (RefSeq) 60S ribosomal protein L10a (A)	60S ribosomal protein L10a [Chenopodium quinoa]	RecName: Full=60S ribosomal protein L10a {ECO:0000303|PubMed:21205822};	RecName: Full=Ribosomal protein {ECO:0000256|RuleBase:RU000659};	60S ribosomal protein L10A	GO:0022625,cytosolic large ribosomal subunit; GO:0003723,RNA binding; GO:0003735,structural constituent of ribosome; GO:0000470,maturation of LSU-rRNA; GO:0006412,translation	Ribosomal protein L1p/L10e family
gene-LOC110684624	11.43	12.78	16.69	7.97	5.4	5.32	204	224	293	135	103	87	0.497	-1.008	9.61334e-05	0.00162487	down	NW_018743732.1	48389	50552	+	LOC110684624	--	K02639 ferredoxin | (RefSeq) ferredoxin, root R-B2-like (A)	ferredoxin, root R-B2-like [Chenopodium quinoa]	RecName: Full=Ferredoxin-3, chloroplastic; AltName: Full=Ferredoxin III; Short=Fd III; Flags: Precursor;	RecName: Full=Ferredoxin {ECO:0000256|RuleBase:RU364001}; Flags: Fragment;	--	GO:0009507,chloroplast; GO:0009570,chloroplast stroma; GO:0009578,etioplast stroma; GO:0051537,2 iron, 2 sulfur cluster binding; GO:0009055,electron transfer activity; GO:0046872,metal ion binding; GO:0022900,electron transport chain	2Fe-2S iron-sulfur cluster binding domain
gene-LOC110684666	2.4	3.85	2.59	0.69	0.37	1.15	66	104	70	18	11	29	0.263	-1.927	0.000786757	0.00912687	down	NW_018743732.1	479944	482319	-	LOC110684666	--	K09841 xanthoxin dehydrogenase [EC:1.1.1.288] | (RefSeq) xanthoxin dehydrogenase-like (A)	short-chain dehydrogenase reductase 2a-like [Chenopodium quinoa]	RecName: Full=Short-chain dehydrogenase reductase 2a; Short=AtSDR2a; EC=1.1.1.-;	SubName: Full=Uncharacterized protein {ECO:0000313|EMBL:KNA18268.1};	Reductases with broad range of substrate specificities	GO:0016491,oxidoreductase activity	Enoyl-(Acyl carrier protein) reductase
gene-LOC110684690	0.3	0.07	2.23	0	0	0.04	9	2	66	0	0	1	0.018	-5.783	0.00102257	0.0111883	down	NW_018743732.1	95225	99171	+	LOC110684690	--	--	--	--	--	--	--	--
gene-LOC110684714	0.73	0.43	0.95	0.11	0.04	0.08	47	27	60	7	3	5	0.127	-2.975	1.61704e-06	4.51443e-05	down	NW_018743742.1	518958	522381	+	LOC110684714	--	K13435 serine/threonine-protein kinase Pto | (RefSeq) receptor-like protein kinase HERK 1 (A)	probable receptor-like protein kinase At5g59700 [Chenopodium quinoa]	RecName: Full=Probable receptor-like protein kinase At5g59700; EC=2.7.11.-; Flags: Precursor;	SubName: Full=Uncharacterized protein {ECO:0000313|EMBL:KNA22421.1};	Serine/threonine protein kinase	GO:0016021,integral component of membrane; GO:0005886,plasma membrane; GO:0009506,plasmodesma; GO:0005524,ATP binding; GO:0004674,protein serine/threonine kinase activity	Protein tyrosine kinase
gene-LOC110684752	0.65	0.33	1.17	0.24	0.02	0	26	13	46	9	1	0	0.131	-2.93	0.00765084	0.0499894	down	NW_018742275.1	557055	561299	-	LOC110684752	--	K01193 beta-fructofuranosidase [EC:3.2.1.26] | (RefSeq) LOC109747879; beta-fructofuranosidase, insoluble isoenzyme 3-like (A)	UPF0481 protein At3g47200-like [Chenopodium quinoa]	RecName: Full=UPF0481 protein At3g47200;	SubName: Full=Uncharacterized protein {ECO:0000313|EMBL:KNA18694.1};	--	GO:0016021,integral component of membrane; GO:0005886,plasma membrane	Plant protein of unknown function
gene-LOC110684790	2.92	2.85	4.33	1.49	1.09	1.38	120	115	175	58	48	52	0.433	-1.209	1.88724e-05	0.000402374	down	NW_018743783.1	158421	161785	-	LOC110684790	--	--	--	--	--	--	--	--
gene-LOC110684795	2.22	0.69	11.02	1.16	0.68	0.48	147	45	718	73	48	29	0.206	-2.282	0.00296893	0.0252278	down	NW_018743783.1	343693	349143	+	LOC110684795	--	K11498 centromeric protein E | (RefSeq) kinesin-like protein NACK1 (A)	kinesin-like protein NACK1 [Chenopodium quinoa]	RecName: Full=Kinesin-like protein NACK1; AltName: Full=NPK1-activating kinesin-1;	RecName: Full=Kinesin-like protein {ECO:0000256|RuleBase:RU000394};	Kinesin-like protein	GO:0005874,microtubule; GO:0005634,nucleus; GO:0009524,phragmoplast; GO:0005524,ATP binding; GO:0008017,microtubule binding; GO:0003777,microtubule motor activity; GO:0000919,cell plate assembly; GO:0007018,microtubule-based movement	Kinesin motor domain
gene-LOC110684818	0.19	0.22	0.27	0	0	0	18	20	25	0	0	0	0.01	-6.684	2.15812e-06	5.85435e-05	down	NW_018743783.1	1687241	1692148	+	LOC110684818	--	--	--	--	--	--	--	--
gene-LOC110684837	1.75	1.31	1.71	0.05	0.12	0.12	79	58	76	2	6	5	0.068	-3.879	5.24954e-11	3.47064e-09	down	NW_018743783.1	2554894	2576861	+	LOC110684837	--	K17675 ATP-dependent RNA helicase SUPV3L1/SUV3 [EC:3.6.4.13] | (RefSeq) DExH-box ATP-dependent RNA helicase DExH16, mitochondrial-like isoform X1 (A)	DExH-box ATP-dependent RNA helicase DExH16, mitochondrial-like isoform X1 [Chenopodium quinoa]	RecName: Full=DExH-box ATP-dependent RNA helicase DExH16, mitochondrial {ECO:0000305}; EC=3.6.4.13 {ECO:0000269|PubMed:10570936}; AltName: Full=ATP-dependent RNA helicase SUV3 {ECO:0000303|PubMed:10570936}; Short=AtSUV3 {ECO:0000303|PubMed:10570936}; AltName: Full=Protein EMBRYO SAC DEVELOPMENT ARREST 15 {ECO:0000303|PubMed:15634699}; AltName: Full=Protein POLLEN DEVELOPMENT DEFECTIVE 17 {ECO:000…	SubName: Full=Uncharacterized protein {ECO:0000313|EMBL:KNA22974.1};	Mitochondrial RNA helicase SUV3, DEAD-box superfamily	GO:0045025,mitochondrial degradosome; GO:0042645,mitochondrial nucleoid; GO:0005739,mitochondrion; GO:0005634,nucleus; GO:0005524,ATP binding; GO:0004004,ATP-dependent RNA helicase activity; GO:0003723,RNA binding; GO:0009561,megagametogenesis; GO:0000965,mitochondrial RNA 3'-end processing; GO:0009555,pollen development; GO:0006401,RNA catabolic process; GO:0016070,RNA metabolic process	Mitochondrial degradasome RNA helicase subunit C terminal
gene-LOC110684840	1.34	0.32	5.78	0.57	0.31	0.17	102	24	432	41	25	12	0.173	-2.533	0.00213548	0.0197349	down	NW_018743783.1	2719940	2725829	+	LOC110684840	--	K21776 protein lin-54 | (RefSeq) CRC domain-containing protein TSO1-like (A)	protein tesmin/TSO1-like CXC 2 isoform X1 [Chenopodium quinoa]	RecName: Full=Protein tesmin/TSO1-like CXC 2; Short=AtTCX2; AltName: Full=Protein TSO1-like 2; Short=Protein SOL2;	SubName: Full=Uncharacterized protein {ECO:0000313|EMBL:KNA14172.1};	Metallothionein-like protein	GO:0005634,nucleus; GO:0003700,DNA-binding transcription factor activity; GO:0046872,metal ion binding; GO:0043565,sequence-specific DNA binding; GO:0007275,multicellular organism development; GO:0006355,regulation of transcription, DNA-templated	Tesmin/TSO1-like CXC domain, cysteine-rich domain
gene-LOC110684906	0.34	0.25	0.69	0	0	0	7	5	14	0	0	0	0.025	-5.337	0.00203598	0.0190511	down	NW_018743787.1	416103	419112	-	LOC110684906	--	--	--	--	--	--	--	--
gene-LOC110684944	3.79	2.18	4.67	1.93	0.89	1.22	159	90	193	77	40	47	0.418	-1.257	0.000764683	0.00890398	down	NW_018743788.1	84935	97641	-	LOC110684944	--	K03754 translation initiation factor eIF-2B subunit beta | (RefSeq) translation initiation factor eIF-2B subunit beta-like (A)	translation initiation factor eIF-2B subunit beta-like [Chenopodium quinoa]	RecName: Full=Methylthioribose-1-phosphate isomerase {ECO:0000255|HAMAP-Rule:MF_03119}; Short=M1Pi {ECO:0000255|HAMAP-Rule:MF_03119}; Short=MTR-1-P isomerase {ECO:0000255|HAMAP-Rule:MF_03119}; EC=5.3.1.23 {ECO:0000255|HAMAP-Rule:MF_03119}; AltName: Full=Protein IRON DEFICIENCY INDUCIBLE 2; Short=ZmIDI2; AltName: Full=S-methyl-5-thioribose-1-phosphate isomerase {ECO:0000255|HAMAP-Rule:MF_03119}; A…	SubName: Full=Uncharacterized protein {ECO:0000313|EMBL:KNA04108.1};	Translation initiation factor 2B, beta subunit (eIF-2Bbeta/GCD7)	GO:0005737,cytoplasm; GO:0005634,nucleus; GO:0009506,plasmodesma; GO:0046523,S-methyl-5-thioribose-1-phosphate isomerase activity; GO:0071369,cellular response to ethylene stimulus; GO:0071281,cellular response to iron ion; GO:0071732,cellular response to nitric oxide; GO:0019509,L-methionine salvage from methylthioadenosine	Initiation factor 2 subunit family
gene-LOC110684987	0.56	0.43	1.62	0	0	0	12	9	34	0	0	0	0.012	-6.384	3.40267e-05	0.000672149	down	NW_018742287.1	629673	634093	-	LOC110684987	--	--	--	--	--	--	--	--
gene-LOC110685005	359.66	270.21	408.44	265.19	102.48	98.25	7475	5517	8352	5233	2278	1872	0.478	-1.065	0.00459143	0.0344394	down	NW_018743791.1	540767	542579	+	LOC110685005	--	K02938 large subunit ribosomal protein L8e | (RefSeq) 60S ribosomal protein L8-1 (A)	60S ribosomal protein L8-1 [Chenopodium quinoa]	RecName: Full=60S ribosomal protein L8; AltName: Full=L2; AltName: Full=Ribosomal protein TL2;	SubName: Full=Uncharacterized protein {ECO:0000313|EMBL:KNA08895.1};	60s ribosomal protein L2/L8	GO:0022625,cytosolic large ribosomal subunit; GO:0003723,RNA binding; GO:0003735,structural constituent of ribosome; GO:0002181,cytoplasmic translation	Ribosomal Proteins L2, C-terminal domain
gene-LOC110685014	1.21	0.6	6.73	0.82	0.41	0.18	82	40	448	53	30	11	0.202	-2.308	0.00412694	0.0319895	down	NW_018743791.1	681494	685664	+	LOC110685014	--	--	uncharacterized protein LOC110685014 [Chenopodium quinoa]	--	SubName: Full=Uncharacterized protein {ECO:0000313|EMBL:KNA09351.1};	--	GO:0016021,integral component of membrane	--
gene-LOC110685063	5.08	4.2	11.14	3.66	2.06	1.75	332	270	717	227	144	105	0.414	-1.274	0.000672812	0.00806296	down	NW_018743791.1	1112021	1116883	+	LOC110685063	--	K04728 ataxia telangiectasia mutated family protein [EC:2.7.11.1] | (RefSeq) serine/threonine-protein kinase ATM (A)	uncharacterized protein LOC110685063 [Chenopodium quinoa]	RecName: Full=Serine/threonine-protein kinase ATM; EC=2.7.11.1; AltName: Full=Ataxia telangiectasia mutated homolog; Short=AtATM;	SubName: Full=Uncharacterized protein {ECO:0000313|EMBL:KNA23453.1};	Protein kinase ATM/Tel1, involved in telomere length regulation and DNA repair	GO:0005634,nucleus; GO:0005524,ATP binding; GO:0003677,DNA binding; GO:0004674,protein serine/threonine kinase activity; GO:0006974,cellular response to DNA damage stimulus; GO:0051321,meiotic cell cycle	--
gene-LOC110685064	46.2	33.54	57.87	22.12	13.61	12.25	2336	1666	2879	1062	736	568	0.382	-1.389	2.81679e-08	1.1375e-06	down	NW_018743791.1	1118438	1122379	-	LOC110685064	--	K04043 molecular chaperone DnaK | (RefSeq) heat shock 70 kDa protein, mitochondrial-like (A)	heat shock 70 kDa protein, mitochondrial-like [Chenopodium quinoa]	RecName: Full=Heat shock 70 kDa protein, mitochondrial; Flags: Precursor;	SubName: Full=Heat shock 70 protein {ECO:0000313|EMBL:AAB96660.1};	Molecular chaperones mortalin/PBP74/GRP75, HSP70 superfamily	GO:0005739,mitochondrion; GO:0005524,ATP binding; GO:0051082,unfolded protein binding; GO:0006457,protein folding	Hsp70 protein
gene-LOC110685065	0.16	0.27	0.43	0.06	0.02	0.02	8	13	21	3	1	1	0.133	-2.908	0.00499054	0.0365666	down	NW_018743791.1	1123429	1126699	-	LOC110685065	--	--	uncharacterized protein LOC110685065 [Chenopodium quinoa]	--	SubName: Full=Uncharacterized protein {ECO:0000313|EMBL:KNA23450.1};	--	GO:0016021,integral component of membrane; GO:0046873,metal ion transmembrane transporter activity	CorA-like Mg2+ transporter protein
gene-LOC110685190	0.25	0.07	0.37	0	0	0.04	15	4	22	0	0	2	0.06	-4.06	0.00686737	0.0461208	down	NW_018743792.1	1833192	1850148	-	LOC110685190	--	K17607 type 2A phosphatase activator TIP41 | (RefSeq) TIP41-like protein (A)	uncharacterized protein LOC110685190 isoform X1 [Chenopodium quinoa]	RecName: Full=TIP41-like protein {ECO:0000312|EMBL:AEE86352.1};	SubName: Full=Uncharacterized protein {ECO:0000313|EnsemblPlants:PGSC0003DMT400066188};	Uncharacterized conserved protein	GO:0005829,cytosol	TIP41-like family
gene-LOC110685233	0.93	0.5	1.82	0.14	0.06	0.07	68	36	130	10	5	5	0.1	-3.327	4.32098e-08	1.6726e-06	down	NW_018743792.1	6743899	6748152	-	LOC110685233	--	--	--	--	--	--	--	--
gene-LOC110685292	11.65	10.57	15.64	5.02	3.84	1.84	193	172	255	79	68	28	0.309	-1.695	7.48738e-06	0.000176562	down	NW_018743799.1	237826	239121	-	LOC110685292	--	--	--	--	--	--	--	--
gene-LOC110685330	6.48	8.89	4.13	2.18	2.39	2.42	172	232	108	55	68	59	0.372	-1.425	0.00287394	0.0246279	down	NW_018743812.1	218234	220138	+	LOC110685330	--	--	--	--	--	--	--	--
gene-LOC110685368	15.36	8.46	24.07	10.68	4.39	3.95	1234	668	1903	815	377	291	0.441	-1.182	0.00522169	0.0377274	down	NW_018743812.1	818186	823795	+	LOC110685368	--	K01955 carbamoyl-phosphate synthase large subunit [EC:6.3.5.5] | (RefSeq) carbamoyl-phosphate synthase large chain, chloroplastic-like (A)	carbamoyl-phosphate synthase large chain, chloroplastic-like [Chenopodium quinoa]	RecName: Full=Carbamoyl-phosphate synthase large chain, chloroplastic; EC=6.3.5.5; AltName: Full=Carbamoyl-phosphate synthetase ammonia chain; AltName: Full=Protein VENOSA 6; Flags: Precursor;	SubName: Full=Uncharacterized protein {ECO:0000313|EMBL:KNA17608.1};	Multifunctional pyrimidine synthesis protein CAD (includes carbamoyl-phophate synthetase, aspartate transcarbamylase, and glutamine amidotransferase)	GO:0005951,carbamoyl-phosphate synthase complex; GO:0009507,chloroplast; GO:0009570,chloroplast stroma; GO:0016020,membrane; GO:0005524,ATP binding; GO:0004087,carbamoyl-phosphate synthase (ammonia) activity; GO:0004088,carbamoyl-phosphate synthase (glutamine-hydrolyzing) activity; GO:0046872,metal ion binding; GO:0044205,'de novo' UMP biosynthetic process; GO:0006526,arginine biosynthetic proces…	Carbamoyl-phosphate synthase L chain, ATP binding domain
gene-LOC110685407	0.2	0.2	0.4	0	0	0.03	7	7	14	0	0	1	0.044	-4.508	0.00428833	0.0327848	down	NW_018742287.1	2374618	2381380	-	LOC110685407	--	K09419 heat shock transcription factor, other eukaryote | (RefSeq) heat stress transcription factor A-6b-like (A)	heat stress transcription factor A-6b-like [Chenopodium quinoa]	RecName: Full=Heat stress transcription factor A-6b; Short=AtHsfA6b; AltName: Full=AtHsf-07;	SubName: Full=Uncharacterized protein {ECO:0000313|EMBL:OAY55693.1};	Heat shock transcription factor	GO:0005737,cytoplasm; GO:0005634,nucleus; GO:0003700,DNA-binding transcription factor activity; GO:0043565,sequence-specific DNA binding; GO:0006351,transcription, DNA-templated	HSF-type DNA-binding
gene-LOC110685484	1.48	1.16	3.31	0	0.51	0.05	30	23	66	0	11	1	0.117	-3.092	0.00454266	0.0341628	down	NW_018743814.1	929515	931232	+	LOC110685484	--	--	--	--	--	--	--	--
gene-LOC110685629	2.53	1.78	2.48	0.1	0.3	0.05	55	38	53	2	7	1	0.075	-3.73	2.92753e-07	9.72907e-06	down	NW_018743850.1	4245292	4247020	-	LOC110685629	--	--	--	--	--	--	--	--
gene-LOC110685733	0.13	0.09	0.41	0	0	0	6	4	18	0	0	0	0.024	-5.398	0.0024515	0.0218448	down	NW_018743850.1	7258444	7261420	-	LOC110685733	--	K17604 zinc finger SWIM domain-containing protein 3 | (RefSeq) protein FAR1-RELATED SEQUENCE 5-like (A)	PKS-NRPS hybrid synthetase CHGG_01239-like [Chenopodium quinoa]	RecName: Full=Protein FAR1-RELATED SEQUENCE 5;	SubName: Full=Uncharacterized protein {ECO:0000313|EMBL:OMO51093.1};	--	GO:0005634,nucleus; GO:0008270,zinc ion binding; GO:0006355,regulation of transcription, DNA-templated	MULE transposase domain
gene-LOC110685829	24.95	24.73	28.23	19.53	7.88	8.28	838	816	933	623	283	255	0.482	-1.052	0.00359234	0.0289075	down	NW_018743850.1	803627	809115	+	LOC110685829	--	K03595 GTPase | (RefSeq) uncharacterized protein LOC110685829 (A)	uncharacterized protein LOC110685829 [Chenopodium quinoa]	RecName: Full=GTPase ERA-like, chloroplastic {ECO:0000305}; AltName: Full=GTP-binding protein Era-like {ECO:0000305}; Flags: Precursor;	SubName: Full=Ras-like GTPase ERA {ECO:0000313|EMBL:PIN15773.1};	Ras-like GTPase ERA	GO:0009507,chloroplast; GO:0042644,chloroplast nucleoid; GO:0005525,GTP binding; GO:0003723,RNA binding; GO:0042254,ribosome biogenesis; GO:0006364,rRNA processing	50S ribosome-binding GTPase
gene-LOC110685850	6.71	1.98	2.13	1.18	0.37	0.47	186	54	58	31	11	12	0.192	-2.381	0.000593868	0.00730436	down	NW_018743850.1	1065348	1067710	+	LOC110685850	--	K00430 peroxidase [EC:1.11.1.7] | (RefSeq) peroxidase 72-like (A)	peroxidase 72-like [Chenopodium quinoa]	RecName: Full=Peroxidase 72; Short=Atperox P72; EC=1.11.1.7; AltName: Full=ATP6a; AltName: Full=PRXR8; Flags: Precursor;	RecName: Full=Peroxidase {ECO:0000256|RuleBase:RU362060, ECO:0000256|SAAS:SAAS00709852}; EC=1.11.1.7 {ECO:0000256|RuleBase:RU362060, ECO:0000256|SAAS:SAAS00709852};	--	GO:0005576,extracellular region; GO:0020037,heme binding; GO:0046872,metal ion binding; GO:0004601,peroxidase activity; GO:0042744,hydrogen peroxide catabolic process; GO:0009809,lignin biosynthetic process; GO:0006979,response to oxidative stress	Peroxidase
gene-LOC110685875	0.37	0.05	1.49	0.08	0	0	15	2	60	3	0	0	0.047	-4.397	0.00515574	0.0373666	down	NW_018743850.1	1237078	1239121	+	LOC110685875	--	K20718 LRR receptor-like serine/threonine-protein kinase ERECTA [EC:2.7.11.1] | (RefSeq) LRR receptor-like serine/threonine-protein kinase ERECTA (A)	LRR receptor-like serine/threonine-protein kinase ERL1 [Chenopodium quinoa]	RecName: Full=Probable inactive leucine-rich repeat receptor kinase XIAO {ECO:0000305}; Flags: Precursor;	SubName: Full=Uncharacterized protein {ECO:0000313|EMBL:KNA22794.1};	FOG: Leucine rich repeat	GO:0016021,integral component of membrane; GO:0005886,plasma membrane; GO:0005524,ATP binding; GO:0004672,protein kinase activity; GO:0009742,brassinosteroid mediated signaling pathway; GO:0090696,post-embryonic plant organ development	Leucine rich repeat
gene-LOC110685886	23.93	25.57	31.53	13.05	5.19	5.49	871	914	1129	451	202	183	0.31	-1.688	2.95061e-06	7.69672e-05	down	NW_018743850.1	1369435	1372060	-	LOC110685886	--	K01051 pectinesterase [EC:3.1.1.11] | (RefSeq) probable pectinesterase 53 isoform X1 (A)	probable pectinesterase 53 isoform X1 [Chenopodium quinoa]	RecName: Full=Probable pectinesterase 53; Short=PE 53; EC=3.1.1.11; AltName: Full=Pectin methylesterase 53; Short=AtPME53; Flags: Precursor;	RecName: Full=Pectinesterase {ECO:0000256|RuleBase:RU000589}; EC=3.1.1.11 {ECO:0000256|RuleBase:RU000589};	--	GO:0005618,cell wall; GO:0005737,cytoplasm; GO:0005576,extracellular region; GO:0045330,aspartyl esterase activity; GO:0030599,pectinesterase activity; GO:0042545,cell wall modification; GO:0045490,pectin catabolic process	Pectinesterase
gene-LOC110685888	2.6	2.02	6.04	1.9	0.95	0.94	202	154	462	140	79	67	0.404	-1.307	0.00162294	0.0160634	down	NW_018743850.1	1388448	1396744	+	LOC110685888	--	K11498 centromeric protein E | (RefSeq) kinesin-like protein KIN-7E isoform X1 (A)	kinesin-like protein KIN-7E isoform X1 [Chenopodium quinoa]	RecName: Full=Kinesin-like protein KIN-7H {ECO:0000305};	SubName: Full=Uncharacterized protein {ECO:0000313|EMBL:KNA21547.1};	Kinesin-like protein	GO:0005871,kinesin complex; GO:0005874,microtubule; GO:0009506,plasmodesma; GO:0005524,ATP binding; GO:0016887,ATPase activity; GO:0008017,microtubule binding; GO:0003777,microtubule motor activity; GO:0007018,microtubule-based movement	Kinesin motor domain
gene-LOC110685895	0.37	0.33	0.71	0.05	0.09	0.03	39	34	74	5	10	3	0.139	-2.842	4.78296e-06	0.000118085	down	NW_018743850.1	1589434	1595884	-	LOC110685895	--	K16302 metal transporter CNNM | (RefSeq) probable methyltransferase PMT28 (A)	probable methyltransferase PMT27 [Chenopodium quinoa]	RecName: Full=Probable methyltransferase PMT27; EC=2.1.1.-;	SubName: Full=Uncharacterized protein {ECO:0000313|EMBL:KNA13332.1};	--	GO:0005737,cytoplasm; GO:0005789,endoplasmic reticulum membrane; GO:0016021,integral component of membrane; GO:0008757,S-adenosylmethionine-dependent methyltransferase activity; GO:0032259,methylation	Putative S-adenosyl-L-methionine-dependent methyltransferase
gene-LOC110685921	5.24	2.72	5.13	2.88	0.76	0.68	245	125	236	128	38	29	0.349	-1.519	0.0066087	0.0448757	down	NW_018743850.1	2252115	2259289	+	LOC110685921	--	K02945 small subunit ribosomal protein S1 | (RefSeq) uncharacterized protein LOC110685921 isoform X1 (A)	uncharacterized protein LOC110685921 isoform X1 [Chenopodium quinoa]	RecName: Full=30S ribosomal protein S1, chloroplastic {ECO:0000303|PubMed:10874039}; AltName: Full=CS1; AltName: Full=Chloroplastic small ribosomal subunit protein bS1c {ECO:0000303|PubMed:28007896}; Flags: Precursor;	SubName: Full=Uncharacterized protein {ECO:0000313|EMBL:KNA19506.1};	--	GO:0009507,chloroplast; GO:0005840,ribosome; GO:0003723,RNA binding	S1 RNA binding domain
gene-LOC110685958	0.74	0.18	2.48	0.16	0.08	0	25	6	82	5	3	0	0.085	-3.553	0.00176219	0.0171193	down	NW_018742292.1	200033	204172	+	LOC110685958	--	K23877 xyloglucan O-acetyltransferase | (RefSeq) protein ALTERED XYLOGLUCAN 4 (A)	protein trichome birefringence-like 43 [Chenopodium quinoa]	RecName: Full=Protein trichome birefringence-like 1;	SubName: Full=Uncharacterized protein {ECO:0000313|EMBL:KMS96429.1};	--	GO:0005794,Golgi apparatus; GO:0016021,integral component of membrane; GO:0016413,O-acetyltransferase activity; GO:0071554,cell wall organization or biogenesis; GO:0030244,cellulose biosynthetic process	GDSL/SGNH-like Acyl-Esterase family found in Pmr5 and Cas1p
gene-LOC110685959	1.52	0.94	3.11	0	0	0	59	36	119	0	0	0	0.003	-8.364	2.14387e-10	1.27458e-08	down	NW_018743850.1	3026453	3028400	-	LOC110685959	--	--	--	--	--	--	--	--
gene-LOC110686013	0.48	0.12	1.29	0	0	0	16	4	42	0	0	0	0.011	-6.51	8.23548e-05	0.00143016	down	NW_018743850.1	4237813	4243812	+	LOC110686013	--	--	--	--	--	--	--	--
gene-LOC110686057	2.44	2.49	1.93	0.18	0.37	0.11	117	117	91	8	19	5	0.105	-3.256	1.09325e-08	4.74301e-07	down	NW_018743850.1	5224582	5237689	+	LOC110686057	--	--	uncharacterized protein LOC110686057 [Chenopodium quinoa]	--	--	--	--	--
gene-LOC110686136	79.47	68.63	89.3	41	28.83	35.36	2309	1959	2553	1131	896	942	0.482	-1.054	1.43652e-08	6.07009e-07	down	NW_018742292.1	1029523	1033442	-	LOC110686136	--	K06630 14-3-3 protein epsilon | (RefSeq) 14-3-3-like protein D (A)	14-3-3-like protein D [Chenopodium quinoa]	RecName: Full=14-3-3-like protein D; AltName: Full=SGF14D;	SubName: Full=Uncharacterized protein {ECO:0000313|EMBL:KNA24255.1};	Multifunctional chaperone (14-3-3 family)	GO:0019904,protein domain specific binding	14-3-3 protein
gene-LOC110686223	27.56	26.13	18.91	11.38	4.89	9.93	569	530	384	223	108	188	0.375	-1.417	0.000612179	0.00748031	down	NW_018743850.1	7736886	7737918	+	LOC110686223	--	K13448 calcium-binding protein CML | (RefSeq) probable calcium-binding protein CML41 (A)	probable calcium-binding protein CML41 [Chenopodium quinoa]	RecName: Full=Probable calcium-binding protein CML41; AltName: Full=Calmodulin-like protein 41;	SubName: Full=Uncharacterized protein {ECO:0000313|EMBL:KNA05311.1}; Flags: Fragment;	Calmodulin and related proteins (EF-Hand superfamily)	GO:0005509,calcium ion binding	EF-hand domain pair
gene-LOC110686367	12.08	11.33	13.43	0	0	0	243	224	266	0	0	0	0.001	-10.233	4.83072e-17	8.75955e-15	down	NW_018743858.1	679926	682907	-	LOC110686367	--	--	--	--	--	--	--	--
gene-LOC110686387	0.33	0.41	1.11	0	0	0	27	33	90	0	0	0	0.004	-7.849	9.79478e-09	4.2943e-07	down	NW_018743858.1	1832115	1837170	+	LOC110686387	--	--	--	--	--	--	--	--
gene-LOC110686394	4.76	4.16	7.2	1.84	1.76	1.63	207	178	308	76	82	65	0.363	-1.462	4.6086e-09	2.1332e-07	down	NW_018743858.1	2187700	2197730	-	LOC110686394	--	K13513 lysocardiolipin and lysophospholipid acyltransferase [EC:2.3.1.- 2.3.1.51] | (RefSeq) probable 1-acyl-sn-glycerol-3-phosphate acyltransferase 5 (A)	probable 1-acyl-sn-glycerol-3-phosphate acyltransferase 5 [Chenopodium quinoa]	RecName: Full=Probable 1-acyl-sn-glycerol-3-phosphate acyltransferase 4; EC=2.3.1.51; AltName: Full=Lysophosphatidyl acyltransferase 4;	SubName: Full=Uncharacterized protein {ECO:0000313|EMBL:KNA10418.1};	Lysophosphatidic acid acyltransferase LPAAT and related acyltransferases	GO:0016021,integral component of membrane; GO:0003841,1-acylglycerol-3-phosphate O-acyltransferase activity; GO:0016024,CDP-diacylglycerol biosynthetic process	Acyltransferase
gene-LOC110686411	0.88	1.35	0.82	0.04	0.08	0	22	33	20	1	2	0	0.042	-4.576	4.19835e-05	0.00080796	down	NW_018742292.1	2394682	2397362	-	LOC110686411	--	K20855 beta-1,3-galactosyltransferase 1/2/3/4/5/7/8 [EC:2.4.1.-] | (RefSeq) beta-1,3-galactosyltransferase 7-like (A)	beta-1,3-galactosyltransferase 7-like [Chenopodium quinoa]	RecName: Full=Probable beta-1,3-galactosyltransferase 4; EC=2.4.1.-;	RecName: Full=Hexosyltransferase {ECO:0000256|RuleBase:RU363063}; EC=2.4.1.- {ECO:0000256|RuleBase:RU363063};	Galactosyltransferases	GO:0000139,Golgi membrane; GO:0016021,integral component of membrane; GO:0008378,galactosyltransferase activity; GO:0006486,protein glycosylation	Galactosyltransferase
gene-LOC110686449	33.25	48.12	22.95	4.2	5.11	5.05	517	735	351	62	85	72	0.143	-2.804	8.00141e-10	4.21558e-08	down	NW_018743858.1	4964973	4966527	+	LOC110686449	--	--	gibberellin-regulated protein 1-like [Chenopodium quinoa]	RecName: Full=Snakin-2; Flags: Precursor;	SubName: Full=Uncharacterized protein {ECO:0000313|EMBL:KNA07106.1};	--	GO:0005618,cell wall; GO:0005576,extracellular region; GO:0006952,defense response	Gibberellin regulated protein
gene-LOC110686450	0.71	0.27	1.77	0	0	0	35	13	86	0	0	0	0.005	-7.642	1.44196e-07	5.10065e-06	down	NW_018743858.1	4984954	4987605	+	LOC110686450	--	--	uncharacterized protein LOC110686450 [Chenopodium quinoa]	--	SubName: Full=Uncharacterized protein {ECO:0000313|EMBL:KNA12732.1};	--	--	Amiloride-sensitive sodium channel
gene-LOC110686490	24.84	18.54	20.38	0	0	0	270	198	218	0	0	0	0.001	-10.149	2.13755e-16	3.533e-14	down	NW_018743863.1	1109554	1110643	-	LOC110686490	--	--	--	--	--	--	--	--
gene-LOC110686497	1.98	1.55	2.01	0	0.11	0	35	27	35	0	2	0	0.023	-5.46	5.14177e-06	0.000125822	down	NW_018743863.1	353816	355769	-	LOC110686497	--	--	--	--	--	--	--	--
gene-LOC110686499	0.62	0.11	0.49	0	0.03	0	23	4	18	0	1	0	0.027	-5.187	0.00106972	0.0116192	down	NW_018743863.1	530988	533532	+	LOC110686499	--	--	--	--	--	--	--	--
gene-LOC110686593	7.35	6.13	5.81	0	0	0	72	59	56	0	0	0	0.003	-8.284	1.4387e-10	8.81004e-09	down	NW_018743882.1	13966	15135	-	LOC110686593	--	--	--	--	--	--	--	--
gene-LOC110686613	0.35	0.77	1.78	0	0	0	6	13	30	0	0	0	0.013	-6.242	0.000100999	0.00169407	down	NW_018742292.1	1129454	1130762	+	LOC110686613	--	K17086 transmembrane 9 superfamily member 2/4 | (RefSeq) uncharacterized LOC101300290 (A)	uncharacterized protein LOC110686613 [Chenopodium quinoa]	--	SubName: Full=Uncharacterized protein {ECO:0000313|EMBL:KNA10075.1}; Flags: Fragment;	--	GO:0003677,DNA binding; GO:0004803,transposase activity; GO:0006313,transposition, DNA-mediated	MULE transposase domain
gene-LOC110686628	2.86	2.36	5.26	1.27	1.38	1.26	116	94	210	49	60	47	0.427	-1.228	0.00024321	0.00355017	down	NW_018743893.1	103999	108208	+	LOC110686628	--	K19042 E3 ubiquitin-protein ligase BOI and related proteins [EC:2.3.2.27] | (RefSeq) E3 ubiquitin-protein ligase BOI-like isoform X1 (A)	E3 ubiquitin-protein ligase BOI-like isoform X1 [Chenopodium quinoa]	RecName: Full=Probable BOI-related E3 ubiquitin-protein ligase 3; EC=2.3.2.27 {ECO:0000250|UniProtKB:Q9FHE4}; AltName: Full=RING-type E3 ubiquitin transferase BRG3 {ECO:0000305};	SubName: Full=Uncharacterized protein {ECO:0000313|EMBL:KNA25753.1};	Predicted E3 ubiquitin ligase	GO:0005634,nucleus; GO:0046872,metal ion binding; GO:0016740,transferase activity; GO:0006952,defense response; GO:0043161,proteasome-mediated ubiquitin-dependent protein catabolic process; GO:0043067,regulation of programmed cell death	Zinc finger, C3HC4 type (RING finger)
gene-LOC110686637	10.21	7.71	12.11	0	0	0	120	89	140	0	0	0	0.002	-9.14	1.50043e-13	1.52717e-11	down	NW_018743893.1	268876	269777	+	LOC110686637	--	--	--	--	--	--	--	--
gene-LOC110686649	3.99	3.31	6.22	2.15	0.88	1.15	174	142	267	89	41	46	0.338	-1.563	1.9882e-05	0.000420921	down	NW_018743893.1	375926	382907	-	LOC110686649	--	K01968 3-methylcrotonyl-CoA carboxylase alpha subunit [EC:6.4.1.4] | (RefSeq) LOW QUALITY PROTEIN: methylcrotonoyl-CoA carboxylase subunit alpha, mitochondrial-like (A)	serine/threonine-protein kinase HT1-like [Chenopodium quinoa]	RecName: Full=Serine/threonine-protein kinase HT1; EC=2.7.11.1; AltName: Full=High leaf temperature protein 1;	SubName: Full=Uncharacterized protein {ECO:0000313|EMBL:KNA08307.1};	Tyrosine kinase specific for activated (GTP-bound) p21cdc42Hs	GO:0005737,cytoplasm; GO:0005524,ATP binding; GO:0004672,protein kinase activity; GO:0004674,protein serine/threonine kinase activity; GO:0004871,NA; GO:0035556,intracellular signal transduction	Protein tyrosine kinase
gene-LOC110686686	1.35	1.62	2.43	0	0.05	0.24	56	66	99	0	2	9	0.059	-4.087	2.00845e-06	5.48419e-05	down	NW_018743893.1	929764	935575	+	LOC110686686	--	--	--	--	--	--	--	--
gene-LOC110686731	346.05	247.22	333.15	196.17	98.18	88.83	5477	3844	5188	2948	1662	1289	0.441	-1.182	0.00021009	0.00314283	down	NW_018743893.1	1595297	1596088	-	LOC110686731	--	K02960 small subunit ribosomal protein S16e | (RefSeq) 40S ribosomal protein S16-like (A)	40S ribosomal protein S16-like [Chenopodium quinoa]	RecName: Full=40S ribosomal protein S16;	SubName: Full=Uncharacterized protein {ECO:0000313|EMBL:KNA16602.1};	40S ribosomal protein S16	GO:0005840,ribosome; GO:0003735,structural constituent of ribosome; GO:0006412,translation	Ribosomal protein S9/S16
gene-LOC110686772	6.72	5.2	12.45	0	0	0	129	98	235	0	0	0	0.001	-9.5	2.96358e-14	3.48119e-12	down	NW_018743893.1	1157860	1159004	-	LOC110686772	--	K22696 protein-lysine N-methyltransferase EEF2KMT [EC:2.1.1.-] | (RefSeq) uncharacterized protein LOC108202480 isoform X1 (A)	uncharacterized protein LOC110686772 [Chenopodium quinoa]	--	SubName: Full=Mariner transposase {ECO:0000313|EMBL:AFK13835.1};	--	--	Transposase
gene-LOC110686792	8.19	8.99	10.66	4.65	4.04	2.91	89	96	114	48	47	29	0.454	-1.139	0.000716312	0.00847281	down	NW_018743894.1	4610775	4611716	+	LOC110686792	--	--	--	--	--	--	--	--
gene-LOC110686840	1.05	0.83	1.6	0	0.33	0.06	18	14	27	0	6	1	0.135	-2.892	0.00691771	0.0463007	down	NW_018743894.1	3053054	3058433	+	LOC110686840	--	--	--	--	--	--	--	--
gene-LOC110686878	1.95	1.35	5.25	0.66	0.39	0	28	19	74	9	6	0	0.142	-2.815	0.00211752	0.0196176	down	NW_018743894.1	2852381	2853294	+	LOC110686878	--	K11294 nucleolin | (RefSeq) nucleolin-like (A)	uncharacterized protein LOC110686878 [Chenopodium quinoa]	--	SubName: Full=Uncharacterized protein {ECO:0000313|EMBL:CCA66043.1};	FOG: Reverse transcriptase	GO:0003676,nucleic acid binding; GO:0008270,zinc ion binding	Domain of unknown function (DUF4283)
gene-LOC110686899	0.71	0.75	0.94	0.33	0.4	0.34	145	151	191	65	88	65	0.497	-1.009	0.00047893	0.0061372	down	NW_018743906.1	90306	111424	-	LOC110686899	--	K00012 UDPglucose 6-dehydrogenase [EC:1.1.1.22] | (RefSeq) UDP-glucose 6-dehydrogenase 3-like (A)	UDP-glucose 6-dehydrogenase 3-like [Chenopodium quinoa]	RecName: Full=UDP-glucose 6-dehydrogenase 3; Short=UDP-Glc dehydrogenase 3; Short=UDP-GlcDH 3; Short=UDPGDH 3; EC=1.1.1.22; AltName: Full=At-UGD3;	RecName: Full=UDP-glucose 6-dehydrogenase {ECO:0000256|PIRNR:PIRNR000124}; EC=1.1.1.22 {ECO:0000256|PIRNR:PIRNR000124};	UDP-glucose/GDP-mannose dehydrogenase	GO:0005618,cell wall; GO:0005829,cytosol; GO:0005634,nucleus; GO:0051287,NAD binding; GO:0003979,UDP-glucose 6-dehydrogenase activity; GO:0005975,carbohydrate metabolic process; GO:0052546,cell wall pectin metabolic process; GO:0006024,glycosaminoglycan biosynthetic process; GO:0006065,UDP-glucuronate biosynthetic process	UDP-glucose/GDP-mannose dehydrogenase family, UDP binding domain
gene-LOC110686906	3.48	2.29	3.04	1.68	0.96	0.94	142	92	122	65	42	35	0.436	-1.198	0.00094063	0.0105104	down	NW_018743906.1	265797	274586	-	LOC110686906	--	K00791 tRNA dimethylallyltransferase [EC:2.5.1.75] | (RefSeq) tRNA dimethylallyltransferase 9-like (A)	tRNA dimethylallyltransferase 9-like [Chenopodium quinoa]	RecName: Full=tRNA dimethylallyltransferase 9; EC=2.5.1.75; AltName: Full=Isopentenyl-diphosphate: tRNA isopentenyltransferase 9; Short=AtIPT9; Short=IPP transferase 9; Short=IPPT 9;	SubName: Full=Uncharacterized protein {ECO:0000313|EMBL:KNA03920.1};	tRNA delta(2)-isopentenylpyrophosphate transferase	GO:0005739,mitochondrion; GO:0005524,ATP binding; GO:0052381,tRNA dimethylallyltransferase activity; GO:0009691,cytokinin biosynthetic process; GO:0006400,tRNA modification	IPP transferase
gene-LOC110686915	24.34	17.58	40.71	17.29	7.85	7.66	829	588	1364	559	286	239	0.44	-1.186	0.000944102	0.0105303	down	NW_018743906.1	486226	490008	+	LOC110686915	--	K00655 1-acyl-sn-glycerol-3-phosphate acyltransferase [EC:2.3.1.51] | (RefSeq) uncharacterized protein LOC105166581 (A)	multiple organellar RNA editing factor 8, chloroplastic/mitochondrial-like isoform X1 [Chenopodium quinoa]	RecName: Full=Multiple organellar RNA editing factor 8, chloroplastic/mitochondrial {ECO:0000305}; AltName: Full=RNA editing-interacting protein 1 {ECO:0000303|PubMed:22566615}; Flags: Precursor;	SubName: Full=Uncharacterized protein {ECO:0000313|EMBL:KNA21044.1};	--	GO:0009507,chloroplast; GO:0005739,mitochondrion; GO:0050897,cobalt ion binding; GO:0016554,cytidine to uridine editing; GO:0080156,mitochondrial mRNA modification; GO:0006397,mRNA processing; GO:0009451,RNA modification	--
gene-LOC110686944	48.49	7.27	186.63	17.94	5.82	4.32	686	101	2598	241	88	56	0.14	-2.841	0.000738005	0.00867173	down	NW_018743906.1	1524218	1524925	+	LOC110686944	--	K11253 histone H3 | (RefSeq) histone H3.2 (A)	PREDICTED: histone H3.2 [Musa acuminata subsp. malaccensis]	RecName: Full=Histone H3.2;	RecName: Full=Histone H3 {ECO:0000256|RuleBase:RU004471};	Histones H3 and H4	GO:0000786,nucleosome; GO:0005634,nucleus; GO:0003677,DNA binding; GO:0046982,protein heterodimerization activity	Core histone H2A/H2B/H3/H4
gene-LOC110686945	20.7	4.33	85.65	7.46	1.72	0.77	292	60	1189	100	26	10	0.107	-3.23	0.000445657	0.00578425	down	NW_018743906.1	1478036	1478741	+	LOC110686945	--	K11253 histone H3 | (RefSeq) histone H3.2 (A)	PREDICTED: histone H3.2 [Musa acuminata subsp. malaccensis]	RecName: Full=Histone H3.2;	RecName: Full=Histone H3 {ECO:0000256|RuleBase:RU004471};	Histones H3 and H4	GO:0000786,nucleosome; GO:0005634,nucleus; GO:0003677,DNA binding; GO:0046982,protein heterodimerization activity	Core histone H2A/H2B/H3/H4
gene-LOC110686946	3.26	2.58	4.84	1.36	0.73	0.56	63	49	92	25	15	10	0.274	-1.87	3.81305e-05	0.000743386	down	NW_018743906.1	1511692	1513022	+	LOC110686946	--	--	--	--	--	--	--	--
gene-LOC110687033	0.21	0.34	0.25	0	0	0	5	8	6	0	0	0	0.031	-5	0.00658592	0.0447373	down	NW_018743911.1	523316	525972	+	LOC110687033	--	K08488 syntaxin 7 | (RefSeq) syntaxin-22-like isoform X1 (A)	syntaxin-22-like isoform X1 [Chenopodium quinoa]	RecName: Full=Syntaxin-22; Short=AtSYP22; Short=AtVAM3; AltName: Full=Protein SHOOT GRAVITROPISM 3;	SubName: Full=Uncharacterized protein {ECO:0000313|EMBL:KNA06610.1};	SNARE protein PEP12/VAM3/Syntaxin 7/Syntaxin 17	GO:0016021,integral component of membrane; GO:0031902,late endosome membrane; GO:0000325,plant-type vacuole; GO:0009705,plant-type vacuole membrane; GO:0031201,SNARE complex; GO:0005773,vacuole; GO:0005484,SNAP receptor activity; GO:0000149,SNARE binding; GO:0009660,amyloplast organization; GO:0006886,intracellular protein transport; GO:0009959,negative gravitropism; GO:0010118,stomatal movement;…	Syntaxin-like protein
gene-LOC110687041	2.78	1.9	4.54	0.9	0.06	0	127	85	204	39	3	0	0.108	-3.205	0.00321534	0.0267317	down	NW_018743911.1	19626	22250	-	LOC110687041	--	--	--	--	--	--	--	--
gene-LOC110687098	1.54	0.84	2.56	0	0	0	30	16	49	0	0	0	0.007	-7.207	2.0745e-07	7.08324e-06	down	NW_018743919.1	3566536	3567890	+	LOC110687098	--	--	--	--	--	--	--	--
gene-LOC110687103	4.63	3.78	6.42	2.9	1.22	0.75	121	97	165	72	34	18	0.354	-1.498	0.0019319	0.0183111	down	NW_018743919.1	3867631	3868938	+	LOC110687103	--	K22312 hydroxyjasmonate sulfotransferase [EC:2.8.2.39] | (RefSeq) cytosolic sulfotransferase 5-like (A)	cytosolic sulfotransferase 5-like [Chenopodium quinoa]	RecName: Full=Cytosolic sulfotransferase 5; Short=AtSOT5; EC=2.8.2.-; AltName: Full=Flavonoid 7-sulfotransferase 3a; Short=AtST3a;	RecName: Full=Sulfotransferase {ECO:0000256|RuleBase:RU361155}; EC=2.8.2.- {ECO:0000256|RuleBase:RU361155};	Sulfotransferase	GO:0005737,cytoplasm; GO:1990135,flavonoid sulfotransferase activity; GO:0008146,sulfotransferase activity; GO:0009812,flavonoid metabolic process	Sulfotransferase domain
gene-LOC110687144	1.92	1.01	3.51	0.85	0.39	0.25	50	26	90	21	11	6	0.262	-1.932	0.00162941	0.0161094	down	NW_018743919.1	1081709	1083013	+	LOC110687144	--	K17710 pentatricopeptide repeat domain-containing protein 1 | (RefSeq) pentatricopeptide repeat-containing protein At1g63130, mitochondrial-like (A)	pentatricopeptide repeat-containing protein At1g55890, mitochondrial-like [Chenopodium quinoa]	RecName: Full=Pentatricopeptide repeat-containing protein At1g55890, mitochondrial; Flags: Precursor;	SubName: Full=Uncharacterized protein {ECO:0000313|EMBL:KNA10241.1};	FOG: PPR repeat	GO:0043231,intracellular membrane-bounded organelle; GO:0005739,mitochondrion; GO:0004519,endonuclease activity; GO:0003723,RNA binding; GO:0009451,RNA modification	PPR repeat family
gene-LOC110687157	1.12	1.93	1.3	0.41	0.42	0.77	94	159	107	33	38	59	0.393	-1.348	0.00654286	0.0445028	down	NW_018743919.1	1302753	1324422	-	LOC110687157	--	K06883 uncharacterized protein | (RefSeq) LOW QUALITY PROTEIN: uncharacterized protein LOC104799061 (A)	cysteine-rich receptor-like protein kinase 8 [Chenopodium quinoa]	RecName: Full=Cysteine-rich receptor-like protein kinase 25; Short=Cysteine-rich RLK25; EC=2.7.11.-; Flags: Precursor;	SubName: Full=Uncharacterized protein {ECO:0000313|EMBL:GAY34240.1}; Flags: Fragment;	--	GO:0016021,integral component of membrane; GO:0005886,plasma membrane; GO:0005524,ATP binding; GO:0004674,protein serine/threonine kinase activity; GO:0042742,defense response to bacterium; GO:0006468,protein phosphorylation	Protein tyrosine kinase
gene-LOC110687161	4.51	2.52	4.58	0	0	0	40	22	40	0	0	0	0.006	-7.36	4.6647e-08	1.7908e-06	down	NW_018743919.1	1388574	1389921	+	LOC110687161	--	K01183 chitinase [EC:3.2.1.14] | (RefSeq) chitinase-3-like protein 2 (A)	putative cysteine-rich receptor-like protein kinase 35 [Chenopodium quinoa]	RecName: Full=Putative cysteine-rich receptor-like protein kinase 35; Short=Cysteine-rich RLK35; EC=2.7.11.-; Flags: Precursor;	SubName: Full=Uncharacterized protein {ECO:0000313|EMBL:CCB54970.1};	--	GO:0016021,integral component of membrane; GO:0005886,plasma membrane; GO:0005524,ATP binding; GO:0004674,protein serine/threonine kinase activity; GO:0042742,defense response to bacterium; GO:0006468,protein phosphorylation	--
gene-LOC110687269	83.69	48.37	189.75	54.49	31.96	37.67	1430	812	3190	884	584	590	0.448	-1.158	0.00357087	0.0287905	down	NW_018743919.1	1190457	1191779	-	LOC110687269	--	K11251 histone H2A | (RefSeq) probable histone H2A.3 (A)	probable histone H2A.3 [Chenopodium quinoa]	RecName: Full=Protein H2A.7; AltName: Full=wcH2A-10; AltName: Full=wcH2A-4;	RecName: Full=Histone H2A {ECO:0000256|RuleBase:RU003767};	Histone 2A	GO:0000786,nucleosome; GO:0005634,nucleus; GO:0003677,DNA binding; GO:0046982,protein heterodimerization activity	C-terminus of histone H2A
gene-LOC110687299	0.21	0.43	0.82	0.13	0.1	0.05	10	20	38	6	5	2	0.216	-2.208	0.00688643	0.0461989	down	NW_018743919.1	1773127	1800630	+	LOC110687299	--	K06883 uncharacterized protein | (RefSeq) LOW QUALITY PROTEIN: uncharacterized protein LOC104799061 (A)	cysteine-rich receptor-like protein kinase 5 isoform X1 [Chenopodium quinoa]	RecName: Full=Cysteine-rich receptor-like protein kinase 25; Short=Cysteine-rich RLK25; EC=2.7.11.-; Flags: Precursor;	SubName: Full=Uncharacterized protein {ECO:0000313|EMBL:OAY26006.1};	--	GO:0016021,integral component of membrane; GO:0005886,plasma membrane; GO:0005524,ATP binding; GO:0004674,protein serine/threonine kinase activity; GO:0042742,defense response to bacterium; GO:0006468,protein phosphorylation	Protein kinase domain
gene-LOC110687300	33.31	37.79	36.12	5.16	5.79	7.41	1844	2055	1967	271	343	376	0.186	-2.428	8.46983e-16	1.26049e-13	down	NW_018743919.1	1830377	1834642	-	LOC110687300	--	K06883 uncharacterized protein | (RefSeq) LOW QUALITY PROTEIN: uncharacterized protein LOC104799061 (A)	cysteine-rich receptor-like protein kinase 25 [Chenopodium quinoa]	RecName: Full=Cysteine-rich receptor-like protein kinase 25; Short=Cysteine-rich RLK25; EC=2.7.11.-; Flags: Precursor;	SubName: Full=Uncharacterized protein {ECO:0000313|EMBL:KDO37422.1};	--	GO:0016021,integral component of membrane; GO:0005886,plasma membrane; GO:0005524,ATP binding; GO:0004674,protein serine/threonine kinase activity; GO:0042742,defense response to bacterium; GO:0006468,protein phosphorylation	Protein tyrosine kinase
gene-LOC110687364	5.94	3.5	13.4	4.23	2.34	1.85	228	132	506	154	96	65	0.424	-1.239	0.00688114	0.0461801	down	NW_018743919.1	2575614	2580627	-	LOC110687364	--	--	uncharacterized GPI-anchored protein At1g61900-like [Chenopodium quinoa]	RecName: Full=Uncharacterized GPI-anchored protein At1g61900; Flags: Precursor;	SubName: Full=Uncharacterized protein {ECO:0000313|EMBL:KNA05468.1};	--	GO:0031225,anchored component of membrane; GO:0046658,anchored component of plasma membrane; GO:0005886,plasma membrane; GO:0009506,plasmodesma	--
gene-LOC110687401	379.64	283.86	437.14	265.8	99.46	102.01	7177	5272	8131	4771	2011	1768	0.453	-1.143	0.0022849	0.0207144	down	NW_018743919.1	3196989	3199445	-	LOC110687401	--	K02877 large subunit ribosomal protein L15e | (RefSeq) 60S ribosomal protein L15-2 (A)	60S ribosomal protein L15-2 [Chenopodium quinoa]	RecName: Full=60S ribosomal protein L15;	RecName: Full=Ribosomal protein L15 {ECO:0000256|RuleBase:RU000663};	60s ribosomal protein L15	GO:0005840,ribosome; GO:0003735,structural constituent of ribosome; GO:0006412,translation	Ribosomal L15
gene-LOC110687403	3.86	3.67	4.65	1.03	1.23	1.62	91	85	108	23	31	35	0.351	-1.51	5.82335e-05	0.00107155	down	NW_018743919.1	3225740	3229938	+	LOC110687403	--	K22736 vacuolar iron transporter family protein | (RefSeq) vacuolar iron transporter 1-like (A)	vacuolar iron transporter 1-like [Chenopodium quinoa]	RecName: Full=Vacuolar iron transporter 1; Short=AtVIT1;	SubName: Full=Uncharacterized protein {ECO:0000313|EMBL:KNA10933.1};	Uncharacterized membrane protein	GO:0016021,integral component of membrane; GO:0005774,vacuolar membrane; GO:0005384,manganese ion transmembrane transporter activity; GO:0030026,cellular manganese ion homeostasis; GO:0071281,cellular response to iron ion; GO:0006880,intracellular sequestering of iron ion; GO:0055072,iron ion homeostasis; GO:0071421,manganese ion transmembrane transport	VIT family
gene-LOC110687441	2.8	2.16	4.56	1.72	0.36	0.62	103	78	165	60	14	21	0.307	-1.706	0.00211834	0.0196202	down	NW_018743919.1	3793386	3797146	-	LOC110687441	--	K12462 Rho GDP-dissociation inhibitor | (RefSeq) rho GDP-dissociation inhibitor 1-like (A)	rho GDP-dissociation inhibitor 1-like [Chenopodium quinoa]	RecName: Full=Rho GDP-dissociation inhibitor 1; Short=AtRhoGDI1; Short=Rho GDI-1;	SubName: Full=Uncharacterized protein {ECO:0000313|EMBL:KMT04212.1};	Rho GDP-dissociation inhibitor	GO:0005737,cytoplasm; GO:0005096,GTPase activator activity; GO:0005094,Rho GDP-dissociation inhibitor activity; GO:0009932,cell tip growth; GO:0010053,root epidermal cell differentiation	RHO protein GDP dissociation inhibitor
gene-LOC110687443	28.6	17.33	22.18	14.05	7.57	8.24	519	309	396	242	147	137	0.468	-1.097	0.00095759	0.0106553	down	NW_018743919.1	3797824	3801429	-	LOC110687443	--	--	uncharacterized protein LOC110687443 [Chenopodium quinoa]	--	SubName: Full=Uncharacterized protein {ECO:0000313|EMBL:KNA12438.1};	--	--	--
gene-LOC110687501	0.24	0.53	0.23	0	0.03	0.04	14	30	13	0	2	2	0.074	-3.751	0.00103035	0.0112543	down	NW_018743919.1	4435507	4438463	+	LOC110687501	--	--	--	--	--	--	--	--
gene-LOC110687539	4.93	5.98	5.49	2.35	2.2	1.79	42	50	46	19	20	14	0.416	-1.264	0.00576803	0.0405684	down	NW_018743919.1	3761980	3762405	-	LOC110687539	--	--	acyl-CoA--sterol O-acyltransferase 1-like [Chenopodium quinoa]	RecName: Full=Acyl-CoA--sterol O-acyltransferase 1; EC=2.3.1.-; AltName: Full=Sterol O-acyltransferase 1;	SubName: Full=Uncharacterized protein {ECO:0000313|EMBL:KMT04215.1};	--	GO:0016021,integral component of membrane; GO:0008374,O-acyltransferase activity; GO:0016127,sterol catabolic process; GO:0034434,sterol esterification	Membrane bound O-acyl transferase family
gene-LOC110687735	7.23	5.25	11.66	5.38	2.93	2.56	293	209	465	207	127	95	0.5	-1	0.00317077	0.0264851	down	NW_018743920.1	239779	243602	-	LOC110687735	--	--	protein XRI1-like isoform X1 [Chenopodium quinoa]	RecName: Full=Protein XRI1; AltName: Full=Protein X-RAY INDUCED 1;	SubName: Full=Uncharacterized protein {ECO:0000313|EMBL:KNA14647.1};	--	GO:0005634,nucleus; GO:0006281,DNA repair; GO:0007143,female meiotic nuclear division; GO:0007140,male meiotic nuclear division; GO:0009555,pollen development; GO:0010165,response to X-ray	--
gene-LOC110687752	1.46	1.72	3.31	1.23	0.65	0.73	50	58	112	40	24	23	0.448	-1.158	0.00728992	0.0481244	down	NW_018743920.1	395618	400431	-	LOC110687752	--	K14009 B-cell receptor-associated protein 31 | (RefSeq) B-cell receptor-associated protein 31-like (A)	B-cell receptor-associated protein 31-like [Chenopodium quinoa]	--	SubName: Full=Uncharacterized protein {ECO:0000313|EMBL:KNA21184.1};	B-cell receptor-associated protein and related proteins	GO:0005783,endoplasmic reticulum; GO:0016021,integral component of membrane; GO:0006886,intracellular protein transport	Protein of unknown function (DUF724)
gene-LOC110687885	0.22	0.7	0.08	0	0	0	11	34	4	0	0	0	0.011	-6.496	0.000236073	0.00345945	down	NW_018743920.1	2479668	2482137	+	LOC110687885	--	--	--	--	--	--	--	--
gene-LOC110687892	4.8	3.25	8.79	3.51	1.48	1.5	240	160	433	167	79	69	0.43	-1.216	0.00359727	0.0289284	down	NW_018743920.1	2568690	2580812	-	LOC110687892	--	K20285 Rab9 effector protein with kelch motifs | (Kazusa) Lj0g3v0120939.2; - (A)	kelch domain-containing protein 4-like [Chenopodium quinoa]	RecName: Full=Acyl-CoA-binding domain-containing protein 4; Short=Acyl-CoA binding protein 4;	SubName: Full=Uncharacterized protein {ECO:0000313|EMBL:KNA11407.1};	Protein containing repeated kelch motifs	GO:0005737,cytoplasm; GO:0005829,cytosol; GO:0005634,nucleus; GO:0000062,fatty-acyl-CoA binding; GO:0008289,lipid binding; GO:0006869,lipid transport; GO:0009723,response to ethylene; GO:0009753,response to jasmonic acid; GO:0009416,response to light stimulus	Kelch motif
gene-LOC110687896	1.8	0.43	3.17	0.19	0.17	0.07	30	7	52	3	3	1	0.093	-3.427	0.000408307	0.00538556	down	NW_018743920.1	2627736	2630939	+	LOC110687896	--	--	30S ribosomal protein S21, chloroplastic-like [Chenopodium quinoa]	RecName: Full=30S ribosomal protein S21, chloroplastic {ECO:0000303|PubMed:10874039}; AltName: Full=Chloroplastic small ribosomal subunit protein bS21c {ECO:0000303|PubMed:28007896}; Flags: Precursor;	SubName: Full=Uncharacterized protein {ECO:0000313|EMBL:KNA11413.1};	--	GO:0009507,chloroplast; GO:0005840,ribosome; GO:0019843,rRNA binding; GO:0003735,structural constituent of ribosome; GO:0006412,translation	Ribosomal protein S21
gene-LOC110687905	179.27	148.77	204.67	107.2	46.94	41.33	2214	1805	2487	1257	620	468	0.39	-1.357	0.000120316	0.00196686	down	NW_018743920.1	2706465	2707082	-	LOC110687905	--	K02929 large subunit ribosomal protein L44e | (RefSeq) 60S ribosomal protein L44-like (A)	60S ribosomal protein L44-like [Chenopodium quinoa]	RecName: Full=60S ribosomal protein L44;	SubName: Full=BnaA01g23850D protein {ECO:0000313|EMBL:CDY18124.1};	60S ribosomal protein L44	GO:0005840,ribosome; GO:0003735,structural constituent of ribosome; GO:0006412,translation	Ribosomal protein L44
gene-LOC110687942	2.95	1.57	3.17	1.34	0.85	0.62	88	46	93	38	27	17	0.402	-1.315	0.00251537	0.0222599	down	NW_018743920.1	3193629	3197401	+	LOC110687942	--	--	uncharacterized protein LOC110687942 [Chenopodium quinoa]	--	SubName: Full=Uncharacterized protein {ECO:0000313|EMBL:KNA20167.1};	--	--	Subunit CCDC53 of WASH complex
gene-LOC110687948	0.99	0.43	2.16	0.39	0.16	0.06	35	15	75	13	6	2	0.195	-2.362	0.00306181	0.0258115	down	NW_018743920.1	3260388	3265001	-	LOC110687948	--	--	--	--	--	--	--	--
gene-LOC110687949	5.36	4.15	8.37	2.82	1.52	1.69	142	108	218	71	43	41	0.374	-1.42	2.14149e-05	0.000448392	down	NW_018743920.1	3268452	3271435	+	LOC110687949	--	K14684 solute carrier family 25 (mitochondrial phosphate transporter), member 23/24/25/41 | (RefSeq) adenine nucleotide transporter BT1, chloroplastic/mitochondrial (A)	probable mitochondrial adenine nucleotide transporter BTL1 [Chenopodium quinoa]	RecName: Full=Probable mitochondrial adenine nucleotide transporter BTL1; AltName: Full=Adenine nucleotide transporter BT1-like protein 1;	SubName: Full=Uncharacterized protein {ECO:0000313|EMBL:KNA20175.1};	Mitochondrial solute carrier protein	GO:0016021,integral component of membrane; GO:0005743,mitochondrial inner membrane; GO:0022857,transmembrane transporter activity; GO:0006839,mitochondrial transport	Mitochondrial carrier protein
gene-LOC110687972	11.76	8.05	15.24	6.13	3.92	4.85	418	281	533	207	149	158	0.471	-1.086	1.09852e-05	0.000248091	down	NW_018743920.1	3448619	3453669	-	LOC110687972	--	--	uncharacterized protein LOC110687972 [Chenopodium quinoa]	--	SubName: Full=Uncharacterized protein {ECO:0000313|EMBL:KNA10428.1};	--	GO:0048037,cofactor binding	Pyridoxamine 5'-phosphate oxidase
gene-LOC110687997	15.48	11.15	26.4	10.34	2.86	2.94	476	337	799	302	94	83	0.331	-1.593	0.00139103	0.0142436	down	NW_018743920.1	3783884	3790479	-	LOC110687997	--	K11518 mitochondrial import receptor subunit TOM40 | (RefSeq) mitochondrial import receptor subunit TOM40-1-like (A)	mitochondrial import receptor subunit TOM40-1-like [Chenopodium quinoa]	RecName: Full=Mitochondrial import receptor subunit TOM40-1; AltName: Full=Translocase of outer membrane 40 kDa subunit homolog 1; Contains: RecName: Full=Mitochondrial import receptor subunit TOM40-1, N-terminally processed;	SubName: Full=Uncharacterized protein {ECO:0000313|EMBL:KNA09614.1};	Translocase of outer mitochondrial membrane complex, subunit TOM40	GO:0005743,mitochondrial inner membrane; GO:0005741,mitochondrial outer membrane; GO:0005739,mitochondrion; GO:0046930,pore complex; GO:0005774,vacuolar membrane; GO:0015450,P-P-bond-hydrolysis-driven protein transmembrane transporter activity; GO:0015288,porin activity; GO:0015266,NA; GO:0006811,ion transport; GO:0030150,protein import into mitochondrial matrix; GO:0006626,protein targeting to m…	Eukaryotic porin
gene-LOC110688043	256.41	194.22	289.02	175.66	87.27	72.93	6769	5037	7507	4403	2464	1765	0.487	-1.037	0.00136358	0.0140215	down	NW_018743920.1	4355090	4357358	-	LOC110688043	--	K02998 small subunit ribosomal protein SAe | (RefSeq) 40S ribosomal protein SA-like (A)	40S ribosomal protein SA-like [Chenopodium quinoa]	RecName: Full=40S ribosomal protein SA {ECO:0000255|HAMAP-Rule:MF_03015}; AltName: Full=p40;	RecName: Full=40S ribosomal protein SA {ECO:0000256|HAMAP-Rule:MF_03015};	40S ribosomal protein SA (P40)/Laminin receptor 1	GO:0015935,small ribosomal subunit; GO:0003735,structural constituent of ribosome; GO:0006412,translation	Ribosomal protein S2
gene-LOC110688092	0.61	0.12	5.85	0.17	0.22	0.15	26	5	244	7	10	6	0.11	-3.188	0.0029975	0.025407	down	NW_018743920.1	5182935	5187574	-	LOC110688092	--	K09285 AP2-like factor, ANT lineage | (RefSeq) LOW QUALITY PROTEIN: AP2-like ethylene-responsive transcription factor AIL1 (A)	LOW QUALITY PROTEIN: AP2-like ethylene-responsive transcription factor AIL1 [Chenopodium quinoa]	RecName: Full=AP2-like ethylene-responsive transcription factor AIL1; AltName: Full=Protein AINTEGUMENTA-LIKE 1;	SubName: Full=Uncharacterized protein {ECO:0000313|EMBL:KNA18841.1};	--	GO:0005634,nucleus; GO:0003677,DNA binding; GO:0003700,DNA-binding transcription factor activity; GO:0009873,ethylene-activated signaling pathway; GO:0007275,multicellular organism development; GO:0006351,transcription, DNA-templated	AP2 domain
gene-LOC110688106	1.03	1.24	0.95	0	0.09	0	11	13	10	0	1	0	0.034	-4.875	0.00137484	0.0141049	down	NW_018743920.1	5387029	5387646	+	LOC110688106	--	K01772 protoporphyrin/coproporphyrin ferrochelatase [EC:4.99.1.1 4.99.1.9] | (RefSeq) LOW QUALITY PROTEIN: ferrochelatase-1, chloroplastic-like (A)	uncharacterized protein LOC110703771 [Chenopodium quinoa]	--	SubName: Full=Uncharacterized protein {ECO:0000313|EMBL:OMO67845.1};	--	--	Plant mobile domain
gene-LOC110688115	0.82	0.74	1.44	0.36	0.32	0.3	36	32	62	15	15	12	0.367	-1.448	0.00184969	0.0176981	down	NW_018743920.1	5524963	5527150	-	LOC110688115	--	K15121 solute carrier family 25, member 44 | (RefSeq) solute carrier family 25 member 44-like (A)	solute carrier family 25 member 44-like [Chenopodium quinoa]	RecName: Full=Probable S-adenosylmethionine carrier 2, chloroplastic; Flags: Precursor;	SubName: Full=Uncharacterized protein {ECO:0000313|EMBL:KNA04222.1};	Predicted mitochondrial carrier protein	GO:0009941,chloroplast envelope; GO:0031969,chloroplast membrane; GO:0016021,integral component of membrane; GO:0005743,mitochondrial inner membrane; GO:0000095,S-adenosyl-L-methionine transmembrane transporter activity; GO:0006839,mitochondrial transport	Mitochondrial carrier protein
gene-LOC110688116	2.46	3.56	1.79	0.78	0.52	0.64	147	209	105	44	33	35	0.254	-1.978	3.26013e-05	0.000647416	down	NW_018743920.1	5533769	5538967	-	LOC110688116	--	K21435 ankyrin repeat domain-containing protein 6 | (RefSeq) ankyrin repeat-containing protein At3g12360-like (A)	ankyrin repeat-containing protein At2g01680-like [Chenopodium quinoa]	RecName: Full=Ankyrin repeat-containing protein BDA1 {ECO:0000305}; AltName: Full=Protein BIAN DA 1 {ECO:0000303|PubMed:22740615};	SubName: Full=Uncharacterized protein {ECO:0000313|EMBL:KNA04223.1};	FOG: Ankyrin repeat	GO:0016021,integral component of membrane; GO:0005886,plasma membrane; GO:0045087,innate immune response; GO:0009751,response to salicylic acid	Ankyrin repeats (3 copies)
gene-LOC110688204	5.03	1.62	13.1	2.15	1.43	1.74	224	71	574	91	68	71	0.324	-1.626	0.00496321	0.0364235	down	NW_018743920.1	6521947	6526124	-	LOC110688204	--	K05349 beta-glucosidase [EC:3.2.1.21] | (RefSeq) uncharacterized protein LOC110688204 (A)	uncharacterized protein LOC110688204 [Chenopodium quinoa]	RecName: Full=Probable beta-D-xylosidase 6; Short=AtBXL6; EC=3.2.1.-; Flags: Precursor;	SubName: Full=Uncharacterized protein {ECO:0000313|EMBL:KNA21260.1};	--	GO:0005578,NA; GO:0005774,vacuolar membrane; GO:0005773,vacuole; GO:0009044,xylan 1,4-beta-xylosidase activity; GO:0005975,carbohydrate metabolic process	Glycosyl hydrolase family 3 N terminal domain
gene-LOC110688230	238.14	191.98	251.07	166.7	65.22	51.43	3298	2612	3421	2192	966	653	0.438	-1.191	0.00367642	0.0293375	down	NW_018743920.1	6701120	6702938	+	LOC110688230	--	K02908 large subunit ribosomal protein L30e | (RefSeq) 60S ribosomal protein L30 (A)	60S ribosomal protein L30 [Chenopodium quinoa]	RecName: Full=60S ribosomal protein L30;	SubName: Full=Uncharacterized protein {ECO:0000313|EMBL:KNA16188.1}; Flags: Fragment;	60S ribosomal protein L30	GO:0005840,ribosome; GO:0003735,structural constituent of ribosome; GO:0006412,translation	Ribosomal protein L7Ae/L30e/S12e/Gadd45 family
gene-LOC110688260	1.81	2.17	3.05	0.44	0.5	0.38	121	142	200	28	36	23	0.21	-2.255	4.14709e-11	2.80127e-09	down	NW_018743920.1	7003242	7009618	-	LOC110688260	--	K13667 protein glucosyltransferase [EC:2.4.1.-] | (RefSeq) O-glucosyltransferase rumi (A)	O-glucosyltransferase rumi homolog [Chenopodium quinoa]	--	SubName: Full=Uncharacterized protein {ECO:0000313|EMBL:KNA16620.1};	Endoplasmic reticulum protein EP58, contains filamin rod domain and KDEL motif	--	Glycosyl transferase family 90
gene-LOC110688285	255.1	196.94	271.05	154.08	53.71	50.28	2136	1620	2233	1225	481	386	0.376	-1.411	0.000689011	0.00822016	down	NW_018743920.1	7165176	7165717	+	LOC110688285	--	--	--	--	--	--	--	--
gene-LOC110688336	33.48	21.74	76.35	22.66	11.36	9.1	1080	689	2423	694	392	269	0.374	-1.418	0.00111026	0.0119553	down	NW_018743920.1	7658994	7661176	+	LOC110688336	--	K07375 tubulin beta | (RefSeq) tubulin beta-2 chain-like (A)	tubulin beta-2 chain-like [Chenopodium quinoa]	RecName: Full=Tubulin beta-3 chain;	RecName: Full=Tubulin beta chain {ECO:0000256|RuleBase:RU000352};	Beta tubulin	GO:0005737,cytoplasm; GO:0005874,microtubule; GO:0005525,GTP binding; GO:0003924,GTPase activity; GO:0005200,structural constituent of cytoskeleton; GO:0007017,microtubule-based process	Tubulin/FtsZ family, GTPase domain
gene-LOC110688423	0.1	0.65	0.26	0.02	0	0.04	5	33	13	1	0	2	0.062	-4.021	0.00321704	0.0267399	down	NW_018743920.1	8416095	8419432	-	LOC110688423	--	--	protein TRM32-like [Chenopodium quinoa]	RecName: Full=Protein TRM32; AltName: Full=TON1-RECRUITING MOTIF protein 32;	SubName: Full=Uncharacterized protein {ECO:0000313|EMBL:KNA06602.1};	--	--	Domain of unknown function (DUF4378)
gene-LOC110688434	18.27	8.99	35.74	12.61	3.1	3.67	749	362	1442	491	136	138	0.344	-1.541	0.00626742	0.0430287	down	NW_018743920.1	8605927	8607978	+	LOC110688434	--	K11131 H/ACA ribonucleoprotein complex subunit 4 [EC:5.4.99.-] | (RefSeq) H/ACA ribonucleoprotein complex subunit 4-like (A)	H/ACA ribonucleoprotein complex subunit 4-like [Chenopodium quinoa]	RecName: Full=H/ACA ribonucleoprotein complex subunit 4; EC=5.4.99.-; AltName: Full=CBF5 homolog; AltName: Full=Dyskerin; AltName: Full=Nopp-140-associated protein of 57 kDa homolog; Short=AtNAP57; AltName: Full=Nucleolar protein NAP57 homolog;	SubName: Full=Uncharacterized protein {ECO:0000313|EMBL:KNA15312.1};	Pseudouridine synthase	GO:0031429,box H/ACA snoRNP complex; GO:0005829,cytosol; GO:0005730,nucleolus; GO:0009506,plasmodesma; GO:0009982,pseudouridine synthase activity; GO:0003723,RNA binding; GO:0000495,box H/ACA snoRNA 3'-end processing; GO:1990481,mRNA pseudouridine synthesis; GO:0031118,rRNA pseudouridine synthesis; GO:0031120,snRNA pseudouridine synthesis	DKCLD (NUC011) domain
gene-LOC110688446	76.23	22.83	102.91	14.19	19.88	4.85	3586	1055	4763	634	1000	209	0.225	-2.155	0.000222152	0.00329542	down	NW_018743920.1	8710638	8713855	-	LOC110688446	--	K03283 heat shock 70kDa protein 1/2/6/8 | (RefSeq) probable mediator of RNA polymerase II transcription subunit 37c (A)	probable mediator of RNA polymerase II transcription subunit 37c [Chenopodium quinoa]	RecName: Full=Probable mediator of RNA polymerase II transcription subunit 37c; AltName: Full=Heat shock 70 kDa protein 4; AltName: Full=Heat shock cognate 70 kDa protein 4; AltName: Full=Heat shock cognate protein 70-4; Short=AtHsc70-4; AltName: Full=Heat shock protein 70-4; Short=AtHsp70-4;	SubName: Full=Heat shock protein 70 {ECO:0000313|EMBL:AOZ81415.1};	Molecular chaperones HSP70/HSC70, HSP70 superfamily	GO:0048046,apoplast; GO:0005618,cell wall; GO:0005829,cytosol; GO:0005794,Golgi apparatus; GO:0005739,mitochondrion; GO:0005634,nucleus; GO:0005886,plasma membrane; GO:0005774,vacuolar membrane; GO:0005524,ATP binding; GO:0031625,ubiquitin protein ligase binding; GO:0016567,protein ubiquitination; GO:0006355,regulation of transcription, DNA-templated; GO:0009617,response to bacterium; GO:0046686,…	Hsp70 protein
gene-LOC110688470	175.8	31.14	590.07	88.56	22.28	17.95	2649	461	8748	1267	359	248	0.191	-2.387	0.00331179	0.0272967	down	NW_018743920.1	8877668	8878778	+	LOC110688470	--	K11251 histone H2A | (RefSeq) histone H2A-like (A)	histone H2A-like [Chenopodium quinoa]	RecName: Full=Histone H2A;	RecName: Full=Histone H2A {ECO:0000256|RuleBase:RU003767};	Histone 2A	GO:0000786,nucleosome; GO:0005634,nucleus; GO:0003677,DNA binding; GO:0046982,protein heterodimerization activity	C-terminus of histone H2A
gene-LOC110688472	164.18	141.76	159.89	110.64	48.62	45.16	2510	2129	2405	1606	795	633	0.461	-1.117	0.00164106	0.0161595	down	NW_018743920.1	8903777	8905845	+	LOC110688472	--	K02957 small subunit ribosomal protein S15Ae | (RefSeq) 40S ribosomal protein S15a-1-like (A)	40S ribosomal protein S15a-1-like [Chenopodium quinoa]	RecName: Full=40S ribosomal protein S15a-1;	SubName: Full=Uncharacterized protein {ECO:0000313|EnsemblPlants:OGLUM07G06670.2};	40S ribosomal protein S15/S22	GO:0005618,cell wall; GO:0005829,cytosol; GO:0022626,cytosolic ribosome; GO:0022627,cytosolic small ribosomal subunit; GO:0016020,membrane; GO:0005886,plasma membrane; GO:0009506,plasmodesma; GO:0042788,polysomal ribosome; GO:0005774,vacuolar membrane; GO:0003735,structural constituent of ribosome; GO:0006412,translation	Ribosomal protein S8
gene-LOC110688522	212.57	158.91	236.5	137.96	61.53	55.79	4044	2970	4427	2492	1252	973	0.449	-1.155	0.000752517	0.00878697	down	NW_018743920.1	9583752	9586194	-	LOC110688522	--	K02872 large subunit ribosomal protein L13Ae | (RefSeq) 60S ribosomal protein L13a-4 (A)	60S ribosomal protein L13a-4 [Chenopodium quinoa]	RecName: Full=60S ribosomal protein L13a-4;	SubName: Full=Uncharacterized protein {ECO:0000313|EMBL:KNA23023.1};	60S ribosomal protein L13a	GO:0022625,cytosolic large ribosomal subunit; GO:0022626,cytosolic ribosome; GO:0003729,mRNA binding; GO:0003735,structural constituent of ribosome; GO:0006412,translation	Ribosomal protein L13
gene-LOC110688718	0.64	0.42	0.86	0.11	0.13	0.03	53	34	70	9	12	2	0.163	-2.614	2.62304e-05	0.000532794	down	NW_018743937.1	2253593	2258082	-	LOC110688718	--	--	--	--	--	--	--	--
gene-LOC110688826	131.48	82.41	144.15	87.25	29.2	34.16	2998	1846	3234	1889	712	714	0.45	-1.152	0.00424117	0.0325587	down	NW_018743942.1	1205430	1208348	-	LOC110688826	--	K02985 small subunit ribosomal protein S3e | (RefSeq) 40S ribosomal protein S3-3-like (A)	40S ribosomal protein S3-3-like [Chenopodium quinoa]	RecName: Full=40S ribosomal protein S3-3;	SubName: Full=Uncharacterized protein {ECO:0000313|EMBL:KNA17375.1};	40S ribosomal protein S3	GO:0005829,cytosol; GO:0022626,cytosolic ribosome; GO:0022627,cytosolic small ribosomal subunit; GO:0016020,membrane; GO:0005730,nucleolus; GO:0005634,nucleus; GO:0009506,plasmodesma; GO:0003684,damaged DNA binding; GO:0008534,oxidized purine nucleobase lesion DNA N-glycosylase activity; GO:0003723,RNA binding; GO:0003735,structural constituent of ribosome; GO:0002181,cytoplasmic translation; GO:…	Ribosomal protein S3, C-terminal domain
gene-LOC110688828	120.96	92.9	130.89	86.7	35.94	28.92	1825	1377	1943	1242	580	400	0.466	-1.101	0.00478125	0.0354926	down	NW_018743942.1	1381282	1383736	+	LOC110688828	--	K02912 large subunit ribosomal protein L32e | (RefSeq) 60S ribosomal protein L32-1 (A)	60S ribosomal protein L32-1 [Chenopodium quinoa]	RecName: Full=60S ribosomal protein L32-1;	SubName: Full=Uncharacterized protein {ECO:0000313|EMBL:KNA17331.1};	60S ribosomal protein L32	GO:0005829,cytosol; GO:0022625,cytosolic large ribosomal subunit; GO:0022626,cytosolic ribosome; GO:0005730,nucleolus; GO:0042788,polysomal ribosome; GO:0003735,structural constituent of ribosome; GO:0006412,translation	Ribosomal protein L32
gene-LOC110688844	14.03	11.56	12.99	8.14	4.32	5.23	325	263	296	179	107	111	0.488	-1.035	0.000613501	0.00749402	down	NW_018743942.1	1727642	1730739	-	LOC110688844	--	K00588 caffeoyl-CoA O-methyltransferase [EC:2.1.1.104] | (RefSeq) tricin synthase 1-like (A)	uncharacterized protein LOC110688844 [Chenopodium quinoa]	RecName: Full=Tricin synthase 1; EC=2.1.1.175; AltName: Full=Caffeoyl-CoA 3-O-methyltransferase ROMT15;	SubName: Full=Uncharacterized protein {ECO:0000313|EMBL:KNA06877.1}; Flags: Fragment;	O-methyltransferase	GO:0005634,nucleus; GO:0046872,metal ion binding; GO:0008171,O-methyltransferase activity; GO:0008757,S-adenosylmethionine-dependent methyltransferase activity; GO:0032259,methylation	O-methyltransferase
gene-LOC110688922	1.49	0.17	5.52	0.25	0.11	0	89	10	324	14	7	0	0.06	-4.058	0.000422687	0.00555366	down	NW_018743945.1	28842	46347	-	LOC110688922	--	K15404 aldehyde decarbonylase [EC:4.1.99.5] | (RefSeq) protein ECERIFERUM 1-like (A)	protein ECERIFERUM 1-like [Chenopodium quinoa]	RecName: Full=Protein ECERIFERUM 1;	SubName: Full=Uncharacterized protein {ECO:0000313|EMBL:KNA09075.1};	--	GO:0005789,endoplasmic reticulum membrane; GO:0016021,integral component of membrane; GO:0005506,iron ion binding; GO:0016491,oxidoreductase activity; GO:0043447,alkane biosynthetic process; GO:0042742,defense response to bacterium; GO:0050832,defense response to fungus; GO:0008610,lipid biosynthetic process; GO:0006629,lipid metabolic process; GO:0009414,response to water deprivation; GO:0010025…	WAX2 C-terminal domain
gene-LOC110688935	1.77	2.25	2.18	0.16	0.07	0.48	24	30	29	2	1	6	0.121	-3.042	0.000277006	0.00393433	down	NW_018743946.1	4277854	4281917	-	LOC110688935	--	K14964 Set1/Ash2 histone methyltransferase complex subunit ASH2 | (RefSeq) hypothetical protein (A)	uncharacterized protein LOC110688935 [Chenopodium quinoa]	--	SubName: Full=Uncharacterized protein {ECO:0000313|EMBL:KNA18197.1};	--	--	Universal stress protein family
gene-LOC110688974	1.03	0.5	0.93	0.17	0.15	0.2	44	21	39	7	7	8	0.238	-2.069	0.00049408	0.00628605	down	NW_018743946.1	1669955	1673384	-	LOC110688974	--	K03860 phosphatidylinositol glycan, class Q | (RefSeq) N-acetylglucosaminyl-phosphatidylinositol biosynthetic protein gpi1-like (A)	gibberellin-regulated protein 4-like [Chenopodium quinoa]	RecName: Full=Gibberellin-regulated protein 4; AltName: Full=GAST1 protein homolog 4; Flags: Precursor;	SubName: Full=Uncharacterized protein {ECO:0000313|EMBL:OAY31028.1};	--	GO:0005623,cell; GO:0005576,extracellular region; GO:0045454,cell redox homeostasis; GO:0009740,gibberellic acid mediated signaling pathway; GO:0009739,response to gibberellin	Gibberellin regulated protein
gene-LOC110688993	0.59	0.09	0.96	0	0	0	13	2	21	0	0	0	0.018	-5.758	0.00139655	0.0142923	down	NW_018743946.1	2768682	2769868	+	LOC110688993	--	--	uncharacterized protein LOC110688993 [Chenopodium quinoa]	--	--	--	--	Zinc knuckle
gene-LOC110689005	24.02	22.64	37.89	15.11	13.15	7.34	514	476	798	307	301	144	0.466	-1.1	0.000372487	0.0049996	down	NW_018743946.1	3429201	3432697	-	LOC110689005	--	K22128 piezo-type mechanosensitive ion channel component 1/2 | (RefSeq) hypothetical protein (A)	lamin-like protein [Chenopodium quinoa]	RecName: Full=Lamin-like protein; Flags: Precursor;	SubName: Full=Plastocyanin-like protein {ECO:0000313|EMBL:OMO79374.1};	--	GO:0031225,anchored component of membrane; GO:0046658,anchored component of plasma membrane; GO:0005886,plasma membrane; GO:0005773,vacuole; GO:0009055,electron transfer activity	Plastocyanin-like domain
gene-LOC110689014	3.29	2.48	2.98	0	0	0	73	54	65	0	0	0	0.003	-8.302	8.16529e-11	5.20277e-09	down	NW_018743946.1	3788390	3791498	-	LOC110689014	--	K13201 nucleolysin TIA-1/TIAR | (RefSeq) oligouridylate-binding protein 1-like isoform X1 (A)	uncharacterized protein LOC110689014 [Chenopodium quinoa]	--	SubName: Full=Uncharacterized protein {ECO:0000313|EMBL:KNA26131.1};	--	GO:0016021,integral component of membrane	GRF zinc finger
gene-LOC110689061	0.45	0.3	0.68	0	0	0	12	8	18	0	0	0	0.017	-5.909	0.000152667	0.0023971	down	NW_018743946.1	3249469	3250969	+	LOC110689061	--	--	uncharacterized protein LOC110689061 [Chenopodium quinoa]	--	SubName: Full=Uncharacterized protein {ECO:0000313|EMBL:KOM55435.1};	--	--	--
gene-LOC110689066	0.92	1.05	2.49	0.29	0.2	0.12	17	19	45	5	4	2	0.156	-2.684	0.000429103	0.00561425	down	NW_018743946.1	1680848	1682755	+	LOC110689066	--	--	--	--	--	--	--	--
gene-LOC110689069	1.01	0.41	2.73	0	0	0	20	8	53	0	0	0	0.008	-6.913	6.23567e-06	0.000149408	down	NW_018743946.1	1875885	1877368	-	LOC110689069	--	--	--	--	--	--	--	--
gene-LOC110689072	9.47	5.88	15.12	4.79	1.72	1.34	77	47	121	37	15	10	0.284	-1.815	0.000986037	0.0108875	down	NW_018743946.1	2330566	2331130	+	LOC110689072	--	--	--	--	--	--	--	--
gene-LOC110689118	77.35	55.33	85.6	41.39	28.59	24.31	2600	1827	2831	1321	1028	749	0.471	-1.087	3.3024e-06	8.51918e-05	down	NW_018743955.1	56236	58705	+	LOC110689118	--	K02930 large subunit ribosomal protein L4e | (RefSeq) 60S ribosomal protein L4-like (A)	60S ribosomal protein L4-like [Chenopodium quinoa]	RecName: Full=60S ribosomal protein L4-1; Short=L1;	SubName: Full=Uncharacterized protein {ECO:0000313|EMBL:KNA18419.1};	Ribosomal protein RPL1/RPL2/RL4L4	GO:0005618,cell wall; GO:0009507,chloroplast; GO:0005829,cytosol; GO:0022625,cytosolic large ribosomal subunit; GO:0022626,cytosolic ribosome; GO:0016020,membrane; GO:0005730,nucleolus; GO:0005886,plasma membrane; GO:0009506,plasmodesma; GO:0042788,polysomal ribosome; GO:0005773,vacuole; GO:0003729,mRNA binding; GO:0003735,structural constituent of ribosome; GO:0002181,cytoplasmic translation	Ribosomal protein L4/L1 family
gene-LOC110689121	0.68	0.8	0.8	0	0	0	39	45	45	0	0	0	0.005	-7.739	3.79236e-09	1.79316e-07	down	NW_018743955.1	86839	93247	+	LOC110689121	--	--	--	--	--	--	--	--
gene-LOC110689144	3.31	0.65	5.95	1.1	0.13	0.2	73	14	129	23	3	4	0.161	-2.632	0.00424732	0.0325797	down	NW_018743955.1	822912	825513	+	LOC110689144	--	K09286 EREBP-like factor | (RefSeq) ethylene-responsive transcription factor RAP2-3-like (A)	ethylene-responsive transcription factor RAP2-3-like [Chenopodium quinoa]	RecName: Full=Ethylene-responsive transcription factor RAP2-3; AltName: Full=Cadmium-induced protein AS30; AltName: Full=Ethylene response factor 72; Short=ERF72; AltName: Full=Ethylene-responsive element binding protein; Short=AtEBP; AltName: Full=Protein RELATED TO APETALA2 3; Short=Related to AP2 3;	SubName: Full=Uncharacterized protein {ECO:0000313|EMBL:KMS95596.1};	--	GO:0005737,cytoplasm; GO:0005634,nucleus; GO:0005886,plasma membrane; GO:0003677,DNA binding; GO:0003700,DNA-binding transcription factor activity; GO:0043565,sequence-specific DNA binding; GO:0008219,cell death; GO:0009873,ethylene-activated signaling pathway; GO:0010286,heat acclimation; GO:0045893,positive regulation of transcription, DNA-templated; GO:0009735,response to cytokinin; GO:0009723…	AP2 domain
gene-LOC110689157	1	0.48	3.07	0.48	0.27	0.17	102	48	308	47	30	16	0.243	-2.044	0.00117631	0.0125292	down	NW_018743955.1	1401768	1414589	-	LOC110689157	--	--	--	--	--	--	--	--
gene-LOC110689175	4.97	7.42	6.17	0	0	0.24	45	66	55	0	0	2	0.013	-6.245	8.74892e-08	3.21189e-06	down	NW_018742329.1	6282751	6284353	+	LOC110689175	--	--	--	--	--	--	--	--
gene-LOC110689182	30.58	5.16	97.06	12.31	1.99	2.05	374	62	1168	143	26	23	0.144	-2.799	0.00154733	0.015504	down	NW_018743955.1	2685708	2686319	+	LOC110689182	--	K11254 histone H4 | (RefSeq) histone H4 (A)	hypothetical protein SETIT_032292mg, partial [Setaria italica]	RecName: Full=Histone H4;	RecName: Full=Histone H4 {ECO:0000256|RuleBase:RU000528}; Flags: Fragment;	Histone H4	GO:0009507,chloroplast; GO:0005829,cytosol; GO:0000788,nuclear nucleosome; GO:0005730,nucleolus; GO:0005886,plasma membrane; GO:0009506,plasmodesma; GO:0009579,thylakoid; GO:0005774,vacuolar membrane; GO:0003677,DNA binding; GO:0042393,histone binding; GO:0046982,protein heterodimerization activity; GO:0006334,nucleosome assembly; GO:0009414,response to water deprivation	Centromere kinetochore component CENP-T histone fold
gene-LOC110689187	20.66	20.05	16.15	2.67	2.69	2.25	962	917	740	118	134	96	0.142	-2.813	8.70869e-19	2.04594e-16	down	NW_018743955.1	3163865	3182678	+	LOC110689187	--	K10268 F-box and leucine-rich repeat protein 2/20 | (RefSeq) F-box protein At3g58530-like (A)	F-box protein At3g58530-like [Chenopodium quinoa]	RecName: Full=F-box protein At3g58530;	SubName: Full=Uncharacterized protein {ECO:0000313|EMBL:KNA17980.1};	Leucine rich repeat proteins, some proteins contain F-box	GO:0005829,cytosol	Leucine Rich repeat
gene-LOC110689192	412.13	324.43	441.79	308.46	115.13	104.04	6490	5019	6845	4612	1939	1502	0.473	-1.081	0.00654965	0.0445395	down	NW_018743955.1	3299875	3301642	-	LOC110689192	--	K02889 large subunit ribosomal protein L21e | (RefSeq) 60S ribosomal protein L21-1 (A)	60S ribosomal protein L21-1 [Chenopodium quinoa]	RecName: Full=60S ribosomal protein L21-1;	SubName: Full=Uncharacterized protein {ECO:0000313|EMBL:KNA14872.1};	60S ribosomal protein L21	GO:0009507,chloroplast; GO:0022625,cytosolic large ribosomal subunit; GO:0022626,cytosolic ribosome; GO:0005730,nucleolus; GO:0003735,structural constituent of ribosome; GO:0006412,translation	Ribosomal protein L21e
gene-LOC110689198	5.66	8.3	10.09	4.23	2.73	1.26	93	134	163	66	48	19	0.368	-1.442	0.00221889	0.0203049	down	NW_018743955.1	3484459	3485280	+	LOC110689198	--	K01870 isoleucyl-tRNA synthetase [EC:6.1.1.5] | (RefSeq) isoleucine--tRNA ligase, chloroplastic/mitochondrial-like (A)	dirigent protein 22-like [Chenopodium quinoa]	RecName: Full=Dirigent protein 3; Short=AtDIR3; Flags: Precursor;	RecName: Full=Dirigent protein {ECO:0000256|RuleBase:RU363099};	--	GO:0048046,apoplast; GO:0016853,isomerase activity	Dirigent-like protein
gene-LOC110689213	31.24	26.87	31.56	16.08	11.63	11.45	839	709	834	410	334	282	0.471	-1.088	7.31053e-07	2.22376e-05	down	NW_018743955.1	4243500	4245854	-	LOC110689213	--	--	uncharacterized protein LOC110689213 [Chenopodium quinoa]	--	SubName: Full=Uncharacterized protein {ECO:0000313|EMBL:KNA06973.1};	--	--	--
gene-LOC110689214	11.4	10.91	13.28	6.52	5.09	3.65	446	419	511	242	213	131	0.464	-1.108	2.54737e-05	0.000519402	down	NW_018743955.1	4320023	4323209	-	LOC110689214	--	K14709 solute carrier family 39 (zinc transporter), member 1/2/3 | (RefSeq) ZIP zinc/iron transport family protein (A)	metal tolerance protein 4-like isoform X1 [Chenopodium quinoa]	RecName: Full=Metal tolerance protein 4; Short=OsMTP4;	SubName: Full=Uncharacterized protein {ECO:0000313|EMBL:KNA15330.1};	Mitochondrial Fe2+ transporter MMT1 and related transporters (cation diffusion facilitator superfamily)	GO:0016021,integral component of membrane; GO:0005774,vacuolar membrane; GO:0008324,cation transmembrane transporter activity	Cation efflux family
gene-LOC110689268	0.29	0.19	0.46	0.05	0.04	0.04	30	20	48	5	4	4	0.152	-2.718	3.81228e-05	0.000743386	down	NW_018743955.1	6339979	6345234	-	LOC110689268	--	--	--	--	--	--	--	--
gene-LOC110689285	3.29	4.37	3.77	0.94	1.5	1.35	125	163	141	34	61	47	0.361	-1.47	0.000306749	0.00428188	down	NW_018743955.1	6596451	6602864	-	LOC110689285	--	K03660 N-glycosylase/DNA lyase [EC:3.2.2.- 4.2.99.18] | (RefSeq) LOW QUALITY PROTEIN: N-glycosylase/DNA lyase OGG1-like (A)	LOW QUALITY PROTEIN: N-glycosylase/DNA lyase OGG1-like [Chenopodium quinoa]	RecName: Full=N-glycosylase/DNA lyase OGG1; Includes: RecName: Full=8-oxoguanine DNA glycosylase 1; Short=AtOGG1; EC=3.2.2.-; Includes: RecName: Full=DNA-(apurinic or apyrimidinic site) lyase; Short=AP lyase; EC=4.2.99.18;	SubName: Full=Uncharacterized protein {ECO:0000313|EMBL:KNA23615.1};	8-oxoguanine DNA glycosylase	GO:0005634,nucleus; GO:0140078,class I DNA-(apurinic or apyrimidinic site) endonuclease activity; GO:0140080,class III/IV DNA-(apurinic or apyrimidinic site) endonuclease activity; GO:0003684,damaged DNA binding; GO:0008534,oxidized purine nucleobase lesion DNA N-glycosylase activity; GO:0006284,base-excision repair; GO:0006281,DNA repair; GO:0006289,nucleotide-excision repair	8-oxoguanine DNA glycosylase, N-terminal domain
gene-LOC110689308	5.5	6.95	6.81	2.14	2.26	2.39	173	215	211	64	76	69	0.382	-1.387	1.08001e-05	0.000244206	down	NW_018743955.1	6795362	6801495	-	LOC110689308	--	K00031 isocitrate dehydrogenase [EC:1.1.1.42] | (RefSeq) isocitrate dehydrogenase [NADP]-like (A)	isocitrate dehydrogenase [NADP]	RecName: Full=Isocitrate dehydrogenase [NADP]; Short=IDH; EC=1.1.1.42; AltName: Full=IDP; AltName: Full=NADP(+)-specific ICDH; AltName: Full=Oxalosuccinate decarboxylase;	RecName: Full=Isocitrate dehydrogenase [NADP] {ECO:0000256|PIRNR:PIRNR000108}; EC=1.1.1.42 {ECO:0000256|PIRNR:PIRNR000108};	NADP-dependent isocitrate dehydrogenase	GO:0005737,cytoplasm; GO:0004450,isocitrate dehydrogenase (NADP+) activity; GO:0000287,magnesium ion binding; GO:0051287,NAD binding; GO:0006097,glyoxylate cycle; GO:0006102,isocitrate metabolic process; GO:0006099,tricarboxylic acid cycle	Isocitrate/isopropylmalate dehydrogenase
gene-LOC110689355	0.3	0.09	0.59	0	0.03	0	16	5	31	0	2	0	0.046	-4.449	0.00229231	0.0207379	down	NW_018743955.1	7305351	7308033	-	LOC110689355	--	K19891 glucan endo-1,3-beta-glucosidase 1/2/3 [EC:3.2.1.39] | (RefSeq) glucan endo-1,3-beta-glucosidase 3-like isoform X1 (A)	glucan endo-1,3-beta-glucosidase, acidic-like [Chenopodium quinoa]	RecName: Full=Glucan endo-1,3-beta-glucosidase; EC=3.2.1.39; AltName: Full=(1->3)-beta-glucan endohydrolase; Short=(1->3)-beta-glucanase; AltName: Full=Beta-1,3-endoglucanase; Flags: Precursor;	SubName: Full=Uncharacterized protein {ECO:0000313|EMBL:KNA23566.1};	--	GO:0005578,NA; GO:0042973,glucan endo-1,3-beta-D-glucosidase activity; GO:0005975,carbohydrate metabolic process; GO:0009626,plant-type hypersensitive response; GO:0009607,response to biotic stimulus	Glycosyl hydrolases family 17
gene-LOC110689406	1.89	0.44	6.97	0.49	0.15	0.1	106	24	384	26	9	5	0.095	-3.401	9.06494e-05	0.00155255	down	NW_018743955.1	7873534	7877564	+	LOC110689406	--	K10398 kinesin family member 11 | (RefSeq) kinesin-like protein KIN-10A (A)	kinesin-like protein KIN-10A [Chenopodium quinoa]	RecName: Full=Kinesin-like protein KIN-10A {ECO:0000305}; AltName: Full=Phragmoplast-associated kinesin-related protein 2 {ECO:0000303|PubMed:11701879}; Short=AtPAKRP2 {ECO:0000303|PubMed:11701879};	SubName: Full=Uncharacterized protein {ECO:0000313|EMBL:KNA24113.1};	Kinesin-like protein	GO:0005737,cytoplasm; GO:0005871,kinesin complex; GO:0005874,microtubule; GO:0009524,phragmoplast; GO:0005524,ATP binding; GO:0008574,ATP-dependent microtubule motor activity, plus-end-directed; GO:0008017,microtubule binding; GO:0007018,microtubule-based movement; GO:0047496,vesicle transport along microtubule	Kinesin motor domain
gene-LOC110689409	196.88	146.4	188.59	120.01	44.72	37.41	2939	2147	2770	1701	714	512	0.399	-1.327	0.00158112	0.015737	down	NW_018743955.1	7946306	7948108	+	LOC110689409	--	K02875 large subunit ribosomal protein L14e | (RefSeq) 60S ribosomal protein L14-2-like (A)	60S ribosomal protein L14-2-like [Chenopodium quinoa]	RecName: Full=60S ribosomal protein L14-2;	SubName: Full=Uncharacterized protein {ECO:0000313|EMBL:PIA45452.1};	60S ribosomal protein L14	GO:0009507,chloroplast; GO:0005829,cytosol; GO:0022625,cytosolic large ribosomal subunit; GO:0022626,cytosolic ribosome; GO:0005783,endoplasmic reticulum; GO:0005730,nucleolus; GO:0009506,plasmodesma; GO:0042788,polysomal ribosome; GO:0005774,vacuolar membrane; GO:0005773,vacuole; GO:0003729,mRNA binding; GO:0003723,RNA binding; GO:0003735,structural constituent of ribosome; GO:0042273,ribosomal …	Ribosomal protein L14
gene-LOC110689415	0.13	0.13	0.49	0.05	0	0	8	8	30	3	0	0	0.075	-3.73	0.00746934	0.0490782	down	NW_018743955.1	8005140	8008268	-	LOC110689415	--	K06180 23S rRNA pseudouridine1911/1915/1917 synthase [EC:5.4.99.23] | (RefSeq) pentatricopeptide repeat-containing protein At1g20230 isoform X1 (A)	putative pentatricopeptide repeat-containing protein At3g23330 [Chenopodium quinoa]	RecName: Full=Putative pentatricopeptide repeat-containing protein At3g23330;	SubName: Full=Uncharacterized protein {ECO:0000313|EMBL:KNA12952.1};	FOG: PPR repeat	GO:0043231,intracellular membrane-bounded organelle; GO:0004519,endonuclease activity; GO:0003723,RNA binding; GO:0008270,zinc ion binding; GO:0009451,RNA modification	PPR repeat
gene-LOC110689493	2.67	3.48	1.09	0	0	0	25	32	10	0	0	0	0.008	-6.882	7.53235e-06	0.000177404	down	NW_018743955.1	6120922	6121865	+	LOC110689493	--	K13466 EIX receptor 1/2 | (RefSeq) LRR receptor-like serine/threonine-protein kinase GSO1 (A)	uncharacterized protein LOC110689493 [Chenopodium quinoa]	RecName: Full=Receptor-like protein EIX2 {ECO:0000305}; AltName: Full=EIX receptor 2 {ECO:0000312|EMBL:AAR28378.1}; Flags: Precursor;	SubName: Full=Uncharacterized protein {ECO:0000313|EMBL:KNA06913.1};	FOG: Leucine rich repeat	GO:0016021,integral component of membrane; GO:0005886,plasma membrane; GO:0050832,defense response to fungus	--
gene-LOC110689494	8.65	13.53	2.31	0	0	0	248	381	65	0	0	0	0.001	-10.293	4.04199e-13	3.77461e-11	down	NW_018743955.1	6122368	6123885	+	LOC110689494	--	K13466 EIX receptor 1/2 | (RefSeq) LRR receptor-like serine/threonine-protein kinase GSO1 (A)	probable LRR receptor-like serine/threonine-protein kinase At1g12460 [Chenopodium quinoa]	RecName: Full=Receptor-like protein EIX2 {ECO:0000305}; AltName: Full=EIX receptor 2 {ECO:0000312|EMBL:AAR28378.1}; Flags: Precursor;	SubName: Full=Uncharacterized protein {ECO:0000313|EMBL:KNA02687.1};	FOG: Leucine rich repeat	GO:0016021,integral component of membrane; GO:0005886,plasma membrane; GO:0050832,defense response to fungus	Leucine rich repeat
gene-LOC110689495	1.19	0.16	0.81	0	0	0	15	2	10	0	0	0	0.023	-5.418	0.00371406	0.0295621	down	NW_018743955.1	6265125	6265754	+	LOC110689495	--	K11253 histone H3 | (RefSeq) uncharacterized protein LOC110788621 (A)	uncharacterized protein LOC110689495 [Chenopodium quinoa]	--	SubName: Full=Uncharacterized protein {ECO:0000313|EMBL:CDP10229.1};	--	GO:0003676,nucleic acid binding; GO:0008270,zinc ion binding	SWIM zinc finger
gene-LOC110689515	0.96	0.13	2.48	0.07	0	0	15	2	38	1	0	0	0.024	-5.365	0.00148815	0.015028	down	NW_018743955.1	7308701	7309479	-	LOC110689515	--	--	--	--	--	--	--	--
gene-LOC110689631	1.63	0.93	5.46	1.15	0.7	0.48	217	122	714	145	100	59	0.346	-1.531	0.0062573	0.0429982	down	NW_018743975.1	372945	395018	-	LOC110689631	--	K02324 DNA polymerase epsilon subunit 1 [EC:2.7.7.7] | (RefSeq) DNA polymerase epsilon catalytic subunit A-like (A)	DNA polymerase epsilon catalytic subunit A-like [Chenopodium quinoa]	RecName: Full=DNA polymerase epsilon catalytic subunit A; EC=2.7.7.7; AltName: Full=DNA polymerase 2 a; Short=AtPOL2a; AltName: Full=DNA polymerase II subunit a; AltName: Full=Protein ABA OVERLY SENSITIVE a; AltName: Full=Protein EARLY IN SHORT DAYS 7; AltName: Full=Protein EMBRYO DEFECTIVE 142; AltName: Full=Protein EMBRYO DEFECTIVE 2284; AltName: Full=Protein EMBRYO DEFECTIVE 529; AltName: Full…	SubName: Full=Uncharacterized protein {ECO:0000313|EMBL:KNA12254.1};	DNA polymerase epsilon, catalytic subunit A	GO:0048046,apoplast; GO:0008622,epsilon DNA polymerase complex; GO:0051539,4 iron, 4 sulfur cluster binding; GO:0003677,DNA binding; GO:0003887,DNA-directed DNA polymerase activity; GO:0000166,nucleotide binding; GO:0008310,single-stranded DNA 3'-5' exodeoxyribonuclease activity; GO:0008270,zinc ion binding; GO:0006287,base-excision repair, gap-filling; GO:0045004,DNA replication proofreading; GO…	Domain of unknown function (DUF1744)
gene-LOC110689635	394.53	297.18	362.91	248.98	108.08	109.87	5519	4084	4995	3307	1617	1409	0.467	-1.098	0.00146278	0.0148319	down	NW_018743975.1	397487	399523	+	LOC110689635	--	K02943 large subunit ribosomal protein LP2 | (RefSeq) 60S acidic ribosomal protein P2-2-like (A)	60S acidic ribosomal protein P2-2-like [Chenopodium quinoa]	RecName: Full=60S acidic ribosomal protein P2;	SubName: Full=60S acidic ribosomal protein P2-2-like {ECO:0000313|RefSeq:XP_016578631.1};	60S acidic ribosomal protein P2	GO:0005840,ribosome; GO:0003735,structural constituent of ribosome; GO:0006414,translational elongation	60s Acidic ribosomal protein
gene-LOC110689749	3.21	1.97	6.04	1.54	0.35	0.76	189	114	350	86	22	41	0.263	-1.928	0.000300899	0.00421199	down	NW_018743977.1	2032394	2039780	-	LOC110689749	--	K17756 long-chain-alcohol oxidase [EC:1.1.3.20] | (RefSeq) long-chain-alcohol oxidase FAO2-like (A)	long-chain-alcohol oxidase FAO2-like [Chenopodium quinoa]	RecName: Full=Long-chain-alcohol oxidase FAO2; EC=1.1.3.20; AltName: Full=Long-chain fatty alcohol oxidase 2;	RecName: Full=Long-chain-alcohol oxidase {ECO:0000256|PIRNR:PIRNR028937}; EC=1.1.3.20 {ECO:0000256|PIRNR:PIRNR028937};	--	GO:0016021,integral component of membrane; GO:0050660,flavin adenine dinucleotide binding; GO:0046577,long-chain-alcohol oxidase activity	GMC oxidoreductase
gene-LOC110689764	264.13	165.3	253.62	156.54	53.99	46.72	4798	2950	4533	2700	1049	778	0.398	-1.331	0.00253209	0.0223761	down	NW_018742329.1	397685	399567	-	LOC110689764	--	K02882 large subunit ribosomal protein L18Ae | (RefSeq) 60S ribosomal protein L18a-2 (A)	60S ribosomal protein L18a-2 [Chenopodium quinoa]	RecName: Full=60S ribosomal protein L18a-2;	RecName: Full=60S ribosomal protein L18a {ECO:0000256|PIRNR:PIRNR002190};	60S ribosomal protein L18A	GO:0005829,cytosol; GO:0022625,cytosolic large ribosomal subunit; GO:0022626,cytosolic ribosome; GO:0005634,nucleus; GO:0005886,plasma membrane; GO:0042788,polysomal ribosome; GO:0005774,vacuolar membrane; GO:0003729,mRNA binding; GO:0003735,structural constituent of ribosome; GO:0009793,embryo development ending in seed dormancy; GO:0009860,pollen tube growth; GO:0006412,translation	Ribosomal proteins 50S-L18Ae/60S-L20/60S-L18A
gene-LOC110689768	3.02	1.03	9.97	1.82	0.6	0.55	234	78	759	134	50	39	0.251	-1.994	0.00431806	0.0329648	down	NW_018743977.1	2442883	2448213	-	LOC110689768	--	K00770 1,4-beta-D-xylan synthase [EC:2.4.2.24] | (RefSeq) cellulose synthase-like protein D5 (A)	cellulose synthase-like protein D5 [Chenopodium quinoa]	RecName: Full=Cellulose synthase-like protein D5; Short=AtCslD5; EC=2.4.1.-;	SubName: Full=Uncharacterized protein {ECO:0000313|EMBL:KNA05973.1};	--	GO:0005794,Golgi apparatus; GO:0000139,Golgi membrane; GO:0016021,integral component of membrane; GO:0016760,cellulose synthase (UDP-forming) activity; GO:0046527,glucosyltransferase activity; GO:0051753,mannan synthase activity; GO:0000919,cell plate assembly; GO:0042546,cell wall biogenesis; GO:0071555,cell wall organization; GO:0030244,cellulose biosynthetic process; GO:0071669,plant-type cell…	Cellulose synthase
gene-LOC110689781	0.16	0.22	1.1	0	0	0	3	4	20	0	0	0	0.025	-5.312	0.00524902	0.0378518	down	NW_018743977.1	2633415	2634898	+	LOC110689781	--	K05387 glutamate receptor, ionotropic, plant | (RefSeq) LOW QUALITY PROTEIN: glutamate receptor 2.3-like (A)	pathogenesis-related protein STH-21-like [Chenopodium quinoa]	RecName: Full=Pathogenesis-related protein STH-21;	SubName: Full=Uncharacterized protein {ECO:0000313|EMBL:KNA07829.1};	--	GO:0006952,defense response; GO:0009607,response to biotic stimulus	Pathogenesis-related protein Bet v I family
gene-LOC110689789	466.82	322.93	479.12	303.36	132.66	139.25	8564	5820	8648	5284	2603	2342	0.485	-1.045	0.00158386	0.015756	down	NW_018743977.1	2800125	2802166	-	LOC110689789	--	K02885 large subunit ribosomal protein L19e | (RefSeq) 60S ribosomal protein L19-3-like (A)	60S ribosomal protein L19-3-like [Chenopodium quinoa]	RecName: Full=60S ribosomal protein L19-1; AltName: Full=Protein EMBRYO DEFECTIVE 2386;	RecName: Full=Ribosomal protein L19 {ECO:0000256|RuleBase:RU000574};	60s ribosomal protein L19	GO:0005829,cytosol; GO:0022625,cytosolic large ribosomal subunit; GO:0022626,cytosolic ribosome; GO:0016020,membrane; GO:0005730,nucleolus; GO:0005886,plasma membrane; GO:0009506,plasmodesma; GO:0042788,polysomal ribosome; GO:0003729,mRNA binding; GO:0003735,structural constituent of ribosome; GO:0006412,translation	Ribosomal protein L19e
gene-LOC110689791	2.34	3.14	2.11	0.99	0.38	0.29	35	46	31	14	6	4	0.224	-2.16	0.00125671	0.0131788	down	NW_018743977.1	2868429	2870164	+	LOC110689791	--	--	proline-rich protein 1-like [Chenopodium quinoa]	--	SubName: Full=Uncharacterized protein {ECO:0000313|EMBL:KNA16054.1};	--	--	Pollen proteins Ole e I like
gene-LOC110689808	2.86	2.73	3.79	0.92	1.09	1.21	49	46	64	15	20	19	0.381	-1.393	0.000971404	0.0107673	down	NW_018742204.1	22829088	22829945	+	LOC110689808	--	--	uncharacterized protein LOC110689808 [Chenopodium quinoa]	--	SubName: Full=Uncharacterized protein {ECO:0000313|EMBL:KNA06600.1};	--	GO:0004852,uroporphyrinogen-III synthase activity; GO:0033014,tetrapyrrole biosynthetic process	Uroporphyrinogen-III synthase HemD
gene-LOC110689809	4.11	5.81	4.59	1.19	0.62	1.16	62	86	68	17	10	16	0.215	-2.217	8.24988e-06	0.000192483	down	NW_018743977.1	3441714	3443782	-	LOC110689809	--	--	--	--	--	--	--	--
gene-LOC110689821	15.66	17.95	11.21	3.2	4.35	6.1	602	678	424	117	179	215	0.324	-1.625	0.000210283	0.00314283	down	NW_018743977.1	3812839	3817280	+	LOC110689821	--	--	--	--	--	--	--	--
gene-LOC110689822	188.3	138.37	172.46	125.84	50.53	46.93	3571	2578	3218	2266	1025	816	0.47	-1.088	0.00452413	0.034092	down	NW_018743977.1	3823128	3825388	-	LOC110689822	--	K02883 large subunit ribosomal protein L18e | (RefSeq) 60S ribosomal protein L18-3-like (A)	60S ribosomal protein L18-3-like [Chenopodium quinoa]	RecName: Full=60S ribosomal protein L18-3;	SubName: Full=Uncharacterized protein {ECO:0000313|EMBL:KNA10844.1};	60s ribosomal protein L18	GO:0005829,cytosol; GO:0022625,cytosolic large ribosomal subunit; GO:0022626,cytosolic ribosome; GO:0016020,membrane; GO:0009506,plasmodesma; GO:0005773,vacuole; GO:0003729,mRNA binding; GO:0003723,RNA binding; GO:0003735,structural constituent of ribosome; GO:0006412,translation	Ribosomal protein 60S L18 and 50S L18e
gene-LOC110689835	9.02	5.31	9.03	0.15	0.13	0.15	64	37	63	1	1	1	0.02	-5.61	6.13402e-09	2.79087e-07	down	NW_018743977.1	4052107	4053784	+	LOC110689835	--	K11096 small nuclear ribonucleoprotein D2 | (RefSeq) small nuclear ribonucleoprotein Sm D2-like (A)	small nuclear ribonucleoprotein Sm D2-like [Chenopodium quinoa]	RecName: Full=Sm-like protein LSM3B {ECO:0000305}; Short=AtLSM3B {ECO:0000303|PubMed:23620288}; AltName: Full=U6 snRNA-associated Sm-like protein LSM3B {ECO:0000305};	SubName: Full=Uncharacterized protein {ECO:0000313|EMBL:OIT08708.1};	Small nuclear ribonucleoprotein (snRNP) Sm core protein	GO:0071013,catalytic step 2 spliceosome; GO:1990726,Lsm1-7-Pat1 complex; GO:0000932,P-body; GO:0071011,precatalytic spliceosome; GO:0046540,U4/U6 x U5 tri-snRNP complex; GO:0005688,U6 snRNP; GO:0003723,RNA binding; GO:0033962,cytoplasmic mRNA processing body assembly; GO:0000398,mRNA splicing, via spliceosome; GO:0000956,nuclear-transcribed mRNA catabolic process	LSM domain
gene-LOC110689882	0.78	0.42	1.38	0	0	0	19	10	33	0	0	0	0.01	-6.585	7.79443e-06	0.000182885	down	NW_018742329.1	1301550	1302940	-	LOC110689882	--	--	uncharacterized protein LOC110689882 [Chenopodium quinoa]	--	--	--	--	--
gene-LOC110689952	4.17	2.88	4.27	0	0	0	149	101	150	0	0	0	0.002	-9.344	4.37215e-14	5.02515e-12	down	NW_018743979.1	3107468	3109600	-	LOC110689952	--	K01303 acylaminoacyl-peptidase [EC:3.4.19.1] | (RefSeq) uncharacterized LOC101311565 (A)	uncharacterized protein LOC110689952 [Chenopodium quinoa]	RecName: Full=Uncharacterized mitochondrial protein AtMg00860; AltName: Full=ORF158;	SubName: Full=Putative reverse transcriptase domain, Ribonuclease H-like domain protein {ECO:0000313|EMBL:OTG24365.1};	FOG: Transposon-encoded proteins with TYA, reverse transcriptase, integrase domains in various combinations	GO:0005739,mitochondrion	RNase H-like domain found in reverse transcriptase
gene-LOC110689953	1.52	0.77	3.13	0	0	0	38	19	77	0	0	0	0.005	-7.677	2.75093e-08	1.1121e-06	down	NW_018743979.1	3109990	3111703	-	LOC110689953	--	K01303 acylaminoacyl-peptidase [EC:3.4.19.1] | (RefSeq) uncharacterized LOC101311565 (A)	uncharacterized protein LOC110689953 [Chenopodium quinoa]	--	SubName: Full=uncharacterized protein LOC104590968 {ECO:0000313|RefSeq:XP_010248043.1};	FOG: Transposon-encoded proteins with TYA, reverse transcriptase, integrase domains in various combinations	--	--
gene-LOC110689982	3.27	3.17	5.8	2.15	1.58	1.38	186	177	324	116	96	72	0.466	-1.103	7.53996e-05	0.00132478	down	NW_018743979.1	356307	408334	+	LOC110689982	--	K06207 GTP-binding protein | (RefSeq) uncharacterized protein LOC110689982 isoform X1 (A)	uncharacterized protein LOC110689982 isoform X1 [Chenopodium quinoa]	RecName: Full=Putative elongation factor TypA-like SVR3, chloroplastic; AltName: Full=Protein HAPPY ON NORFLURAZON 23 {ECO:0000303|PubMed:21208309}; AltName: Full=Protein SUPPRESSOR OF VARIEGATION 3 {ECO:0000303|PubMed:21187014}; Flags: Precursor;	SubName: Full=Uncharacterized protein {ECO:0000313|EMBL:KNA26008.1};	Elongation factor-type GTP-binding protein	GO:0009507,chloroplast; GO:0005525,GTP binding; GO:0003924,GTPase activity; GO:0003746,translation elongation factor activity; GO:0050821,protein stabilization; GO:0009409,response to cold; GO:0006364,rRNA processing	Elongation factor Tu GTP binding domain
gene-LOC110690032	0.4	0.18	0.91	0.02	0	0.03	27	12	61	1	0	2	0.036	-4.779	2.81678e-05	0.000569054	down	NW_018743979.1	3568552	3573519	+	LOC110690032	--	--	--	--	--	--	--	--
gene-LOC110690050	1.79	1.82	2.53	0.94	0.95	0.51	46	46	64	23	26	12	0.431	-1.214	0.00587374	0.0411261	down	NW_018743979.1	4845897	4848213	-	LOC110690050	--	--	--	--	--	--	--	--
gene-LOC110690096	11.35	9.08	7.77	3.29	0.87	1.77	98	77	66	27	8	14	0.217	-2.205	6.80675e-05	0.00121947	down	NW_018743981.1	14066	14611	+	LOC110690096	--	--	--	--	--	--	--	--
gene-LOC110690108	5.07	1.93	20.25	2.87	0.91	1.06	104	39	409	56	20	20	0.213	-2.233	0.00266121	0.0231988	down	NW_018743987.1	258479	259505	+	LOC110690108	--	--	G patch domain-containing protein 4-like [Chenopodium quinoa]	--	SubName: Full=Uncharacterized protein {ECO:0000313|EMBL:KNA11023.1};	--	--	Transmembrane domain of transglycosylase PBP1 at N-terminal
gene-LOC110690110	7.68	8.28	6.82	1.23	1.79	0.92	237	251	207	36	59	26	0.186	-2.426	4.04987e-09	1.89941e-07	down	NW_018743987.1	418073	430215	-	LOC110690110	--	K01719 uroporphyrinogen-III synthase [EC:4.2.1.75] | (RefSeq) LOW QUALITY PROTEIN: uroporphyrinogen-III synthase, chloroplastic-like (A)	LOW QUALITY PROTEIN: uroporphyrinogen-III synthase, chloroplastic-like [Chenopodium quinoa]	RecName: Full=Uroporphyrinogen-III synthase, chloroplastic; EC=4.2.1.75; AltName: Full=Hydroxymethylbilane hydrolyase [cyclizing]; AltName: Full=Uroporphyrinogen-III cosynthase; Flags: Precursor;	SubName: Full=Uncharacterized protein {ECO:0000313|EMBL:KNA24430.1};	--	GO:0009507,chloroplast; GO:0004852,uroporphyrinogen-III synthase activity; GO:0015995,chlorophyll biosynthetic process; GO:0006782,protoporphyrinogen IX biosynthetic process; GO:0006780,uroporphyrinogen III biosynthetic process	Uroporphyrinogen-III synthase HemD
gene-LOC110690116	1.4	1.21	1.09	0.38	0.42	0.42	47	40	36	12	15	13	0.354	-1.498	0.00312363	0.026185	down	NW_018743987.1	691556	693669	+	LOC110690116	--	--	--	--	--	--	--	--
gene-LOC110690120	8.98	5.65	12.73	3.95	2.47	3.46	170	105	237	71	50	60	0.404	-1.307	6.1756e-05	0.00112364	down	NW_018743987.1	1104878	1106644	+	LOC110690120	--	--	--	--	--	--	--	--
gene-LOC110690208	0.19	0.1	0.62	0.02	0.01	0.03	12	6	38	1	1	2	0.088	-3.506	0.00219494	0.02014	down	NW_018744006.1	31	10945	-	LOC110690208	--	--	--	--	--	--	--	--
gene-LOC110690209	1.38	0.89	3.13	0.5	0.44	0.31	79	50	176	27	27	16	0.268	-1.898	9.53817e-05	0.00161594	down	NW_018744006.1	16783	26895	+	LOC110690209	--	K08286 protein-serine/threonine kinase [EC:2.7.11.-] | (RefSeq) serine/threonine-protein kinase D6PK-like (A)	serine/threonine-protein kinase D6PKL1-like isoform X1 [Chenopodium quinoa]	RecName: Full=Serine/threonine-protein kinase D6PKL2; EC=2.7.11.1; AltName: Full=D6 protein kinase-like 2; AltName: Full=Serine/threonine-protein kinase AtPK5;	SubName: Full=Uncharacterized protein {ECO:0000313|EMBL:KNA17119.1};	Putative serine/threonine protein kinase	GO:0005737,cytoplasm; GO:0005730,nucleolus; GO:0005634,nucleus; GO:0005886,plasma membrane; GO:0005524,ATP binding; GO:0016301,kinase activity; GO:0004672,protein kinase activity; GO:0004674,protein serine/threonine kinase activity; GO:0009734,auxin-activated signaling pathway; GO:0010540,basipetal auxin transport; GO:0035556,intracellular signal transduction; GO:0006468,protein phosphorylation	Protein kinase domain
gene-LOC110690221	0.59	0.43	1.12	0.2	0.14	0.23	65	47	122	21	16	23	0.299	-1.743	0.000113781	0.00187323	down	NW_018744020.1	582	12171	+	LOC110690221	--	--	uncharacterized protein LOC110735351 isoform X1 [Chenopodium quinoa]	--	SubName: Full=Uncharacterized protein {ECO:0000313|EMBL:KNA24204.1}; Flags: Fragment;	--	--	Plant transposase (Ptta/En/Spm family)
gene-LOC110690235	2.39	1	3.32	0	0	0	22	9	30	0	0	0	0.011	-6.572	9.24923e-06	0.000212613	down	NW_018744020.1	419635	420647	-	LOC110690235	--	--	--	--	--	--	--	--
gene-LOC110690290	154.01	97.54	144.15	93.12	37.73	40.26	2099	1306	1933	1205	550	503	0.46	-1.12	0.00216785	0.0199637	down	NW_018742329.1	2990208	2992351	-	LOC110690290	--	K02918 large subunit ribosomal protein L35e | (RefSeq) 60S ribosomal protein L35 (A)	60S ribosomal protein L35 [Chenopodium quinoa]	RecName: Full=60S ribosomal protein L35;	SubName: Full=Uncharacterized protein {ECO:0000313|EMBL:KNA16592.1};	60S ribosomal protein L35	GO:0005840,ribosome; GO:0003735,structural constituent of ribosome; GO:0006412,translation	Ribosomal L29 protein
gene-LOC110690317	251.61	166.05	223.19	152.08	61.46	58.36	3560	2308	3107	2043	930	757	0.448	-1.159	0.00248909	0.022085	down	NW_018742329.1	3021843	3024099	+	LOC110690317	--	K02918 large subunit ribosomal protein L35e | (RefSeq) 60S ribosomal protein L35 (A)	60S ribosomal protein L35 [Chenopodium quinoa]	RecName: Full=60S ribosomal protein L35;	SubName: Full=Uncharacterized protein {ECO:0000313|EMBL:KNA16592.1};	60S ribosomal protein L35	GO:0005840,ribosome; GO:0003735,structural constituent of ribosome; GO:0006412,translation	Ribosomal L29 protein
gene-LOC110690383	229.33	148.66	232.48	131.21	51.49	47.72	3098	1973	3090	1683	744	591	0.402	-1.315	0.000717754	0.0084851	down	NW_018744041.1	118120	120920	+	LOC110690383	--	K02915 large subunit ribosomal protein L34e | (RefSeq) 60S ribosomal protein L34 (A)	60S ribosomal protein L34 [Chenopodium quinoa]	RecName: Full=60S ribosomal protein L34;	SubName: Full=Uncharacterized protein {ECO:0000313|EMBL:KNA22879.1};	60s ribosomal protein L34	GO:0005840,ribosome; GO:0003735,structural constituent of ribosome; GO:0006412,translation	Ribosomal protein L34e
gene-LOC110690387	0.51	0.62	0.98	0.16	0	0	10	12	19	3	0	0	0.08	-3.646	0.00520497	0.037634	down	NW_018744041.1	139896	140879	+	LOC110690387	--	--	kunitz trypsin inhibitor 2-like [Chenopodium quinoa]	RecName: Full=Kunitz trypsin inhibitor 2 {ECO:0000305}; Short=AtKTI2 {ECO:0000305}; Flags: Precursor;	SubName: Full=Uncharacterized protein {ECO:0000313|EMBL:KNA14862.1};	--	GO:0048046,apoplast; GO:0005618,cell wall; GO:0004866,endopeptidase inhibitor activity	Trypsin and protease inhibitor
gene-LOC110690411	96.98	68.23	127.65	69.55	28	26.99	1752	1211	2269	1193	541	447	0.46	-1.119	0.00256174	0.0225954	down	NW_018744041.1	722448	725345	+	LOC110690411	--	K02997 small subunit ribosomal protein S9e | (RefSeq) 40S ribosomal protein S9-2 (A)	40S ribosomal protein S9-2 [Chenopodium quinoa]	RecName: Full=40S ribosomal protein S9-1;	SubName: Full=Uncharacterized protein {ECO:0000313|EMBL:KNA14636.1};	Ribosomal protein S4	GO:0005618,cell wall; GO:0009507,chloroplast; GO:0005829,cytosol; GO:0022626,cytosolic ribosome; GO:0022627,cytosolic small ribosomal subunit; GO:0016020,membrane; GO:0005730,nucleolus; GO:0009506,plasmodesma; GO:0042788,polysomal ribosome; GO:0005774,vacuolar membrane; GO:0003729,mRNA binding; GO:0019843,rRNA binding; GO:0003735,structural constituent of ribosome; GO:0045903,positive regulation …	S4 domain
gene-LOC110690414	4.66	1.47	7.41	0.62	0.25	0.49	426	132	667	54	24	41	0.115	-3.118	4.64078e-09	2.13751e-07	down	NW_018742329.1	3360659	3365381	-	LOC110690414	--	K13420 LRR receptor-like serine/threonine-protein kinase FLS2 [EC:2.7.11.1] | (RefSeq) LRR receptor-like serine/threonine-protein kinase FLS2 (A)	LRR receptor-like serine/threonine-protein kinase FLS2 [Chenopodium quinoa]	RecName: Full=LRR receptor-like serine/threonine-protein kinase FLS2; EC=2.7.11.1; AltName: Full=Protein FLAGELLIN-SENSING 2; AltName: Full=Protein FLAGELLIN-SENSITIVE 2; Flags: Precursor;	SubName: Full=Uncharacterized protein {ECO:0000313|EMBL:KNA06626.1};	--	GO:0005768,endosome; GO:0010008,endosome membrane; GO:0016021,integral component of membrane; GO:0016020,membrane; GO:0005886,plasma membrane; GO:0005524,ATP binding; GO:0004675,transmembrane receptor protein serine/threonine kinase activity; GO:0052544,defense response by callose deposition in cell wall; GO:0042742,defense response to bacterium; GO:0016045,detection of bacterium; GO:0006898,rece…	Leucine rich repeat
gene-LOC110690424	10.51	10.5	31.25	7.73	4.75	7	321	315	939	224	155	196	0.433	-1.209	0.00245972	0.0218971	down	NW_018744041.1	993312	997937	-	LOC110690424	--	K15275 solute carrier family 35 (UDP-galactose transporter), member B1 | (RefSeq) UDP-galactose/UDP-glucose transporter 3-like (A)	UDP-galactose/UDP-glucose transporter 3-like [Chenopodium quinoa]	RecName: Full=UDP-galactose/UDP-glucose transporter 3 {ECO:0000303|PubMed:12042319}; Short=AtUTr3 {ECO:0000303|PubMed:12042319};	SubName: Full=Uncharacterized protein {ECO:0000313|EMBL:KNA11156.1};	UDP-galactose transporter related protein	GO:0030176,integral component of endoplasmic reticulum membrane; GO:0030173,integral component of Golgi membrane; GO:0015297,antiporter activity; GO:0005459,UDP-galactose transmembrane transporter activity; GO:0005460,UDP-glucose transmembrane transporter activity; GO:0008643,carbohydrate transport; GO:0009553,embryo sac development; GO:0030968,endoplasmic reticulum unfolded protein response; GO:…	UAA transporter family
gene-LOC110690449	4.59	20.94	0.66	0	0.2	0	64	287	9	0	3	0	0.008	-6.998	0.000706635	0.00838421	down	NW_018744041.1	1290889	1292158	+	LOC110690449	--	K01742 thebaine synthase [EC:4.2.99.24] | (RefSeq) major latex protein 149-like (A)	MLP-like protein 28 [Chenopodium quinoa]	RecName: Full=MLP-like protein 28;	SubName: Full=Uncharacterized protein {ECO:0000313|EMBL:KNA22635.1};	--	GO:0006952,defense response; GO:0009607,response to biotic stimulus	Pathogenesis-related protein Bet v I family
gene-LOC110690457	1.99	1.6	2.73	0.32	0.28	0.56	66	52	89	10	10	17	0.204	-2.292	1.15721e-06	3.35871e-05	down	NW_018744041.1	1340981	1345073	-	LOC110690457	--	K12900 FUS-interacting serine-arginine-rich protein 1 | (RefSeq) serine/arginine-rich SC35-like splicing factor SCL30A (A)	ethylene-responsive transcription factor ERF113-like isoform X1 [Chenopodium quinoa]	RecName: Full=Ethylene-responsive transcription factor ERF114 {ECO:0000303|PubMed:16407444}; AltName: Full=ERF bud enhancer {ECO:0000303|PubMed:23616605};	SubName: Full=Uncharacterized protein {ECO:0000313|EMBL:KNA23729.1};	--	GO:0005634,nucleus; GO:0003700,DNA-binding transcription factor activity; GO:0043565,sequence-specific DNA binding; GO:0050832,defense response to fungus; GO:0009873,ethylene-activated signaling pathway; GO:0007275,multicellular organism development; GO:0006351,transcription, DNA-templated	AP2 domain
gene-LOC110690479	1.7	0.83	7.59	0.83	0.37	0.57	52	25	228	24	12	16	0.212	-2.237	0.00238465	0.0213971	down	NW_018744041.1	1575047	1581151	-	LOC110690479	--	K13464 jasmonate ZIM domain-containing protein | (RefSeq) protein TIFY 9-like isoform X1 (A)	protein TIFY 9-like isoform X1 [Chenopodium quinoa]	RecName: Full=Protein TIFY 9; AltName: Full=Jasmonate ZIM domain-containing protein 10; AltName: Full=Protein JASMONATE-ASSOCIATED 1; AltName: Full=Protein JAZ10;	SubName: Full=Uncharacterized protein {ECO:0000313|EMBL:KNA14931.1};	--	GO:0005634,nucleus; GO:0042803,protein homodimerization activity; GO:0003714,transcription corepressor activity; GO:0006952,defense response; GO:1903507,negative regulation of nucleic acid-templated transcription; GO:2000022,regulation of jasmonic acid mediated signaling pathway; GO:0010112,regulation of systemic acquired resistance; GO:0006355,regulation of transcription, DNA-templated; GO:00097…	tify domain
gene-LOC110690541	37.6	27.53	59.19	15.48	8.37	14.8	399	287	618	156	95	144	0.348	-1.522	1.50972e-06	4.25937e-05	down	NW_018744041.1	2333523	2336217	+	LOC110690541	--	--	stress-associated endoplasmic reticulum protein 2-like [Chenopodium quinoa]	--	SubName: Full=Uncharacterized protein {ECO:0000313|EMBL:KNA07038.1};	Predicted membrane protein	GO:0005783,endoplasmic reticulum; GO:0016021,integral component of membrane	Ribosome associated membrane protein RAMP4
gene-LOC110690551	5.06	3.53	6.16	1.99	1.65	1.93	209	143	250	78	73	73	0.419	-1.253	1.57831e-06	4.42947e-05	down	NW_018744041.1	2411379	2414721	-	LOC110690551	--	K10765 alkylated DNA repair protein alkB homolog 1 [EC:1.14.11.51 4.2.99.18 1.14.11.-] | (RefSeq) alpha-ketoglutarate-dependent dioxygenase alkB-like (A)	alpha-ketoglutarate-dependent dioxygenase alkB-like [Chenopodium quinoa]	RecName: Full=Alpha-ketoglutarate-dependent dioxygenase alkB; EC=1.14.11.-; AltName: Full=Alkylated DNA repair protein alkB homolog;	SubName: Full=Uncharacterized protein {ECO:0000313|EMBL:KNA13169.1};	DNA alkylation damage repair protein	GO:0005739,mitochondrion; GO:0005719,nuclear euchromatin; GO:0043734,DNA-N1-methyladenine dioxygenase activity; GO:0008198,ferrous iron binding; GO:0070579,methylcytosine dioxygenase activity; GO:0006281,DNA repair; GO:0035552,oxidative single-stranded DNA demethylation; GO:0042245,RNA repair	2OG-Fe(II) oxygenase superfamily
gene-LOC110690568	364.88	264.3	362.79	253.78	90.53	91.47	6949	4945	6798	4589	1844	1597	0.463	-1.11	0.00529447	0.0380912	down	NW_018742329.1	4217127	4219216	-	LOC110690568	--	K02997 small subunit ribosomal protein S9e | (RefSeq) 40S ribosomal protein S9-2 (A)	40S ribosomal protein S9-2 [Chenopodium quinoa]	RecName: Full=40S ribosomal protein S9-1;	SubName: Full=Uncharacterized protein {ECO:0000313|EMBL:KNA14636.1};	Ribosomal protein S4	GO:0005618,cell wall; GO:0009507,chloroplast; GO:0005829,cytosol; GO:0022626,cytosolic ribosome; GO:0022627,cytosolic small ribosomal subunit; GO:0016020,membrane; GO:0005730,nucleolus; GO:0009506,plasmodesma; GO:0042788,polysomal ribosome; GO:0005774,vacuolar membrane; GO:0003729,mRNA binding; GO:0019843,rRNA binding; GO:0003735,structural constituent of ribosome; GO:0045903,positive regulation …	S4 domain
gene-LOC110690620	4.49	3.63	6.07	2.34	1.38	1.46	97	77	129	48	32	29	0.402	-1.316	8.28379e-05	0.00143588	down	NW_018744052.1	161690	164620	-	LOC110690620	--	--	--	--	--	--	--	--
gene-LOC110690623	22.45	33.98	15.15	6.24	4.3	4.61	860	1279	571	227	176	162	0.215	-2.216	6.24714e-07	1.94139e-05	down	NW_018744052.1	275788	282761	+	LOC110690623	--	K12890 splicing factor, arginine/serine-rich 1 | (RefSeq) uncharacterized protein LOC103422586 isoform X1 (A)	uncharacterized protein LOC110690623 [Chenopodium quinoa]	--	SubName: Full=Uncharacterized protein {ECO:0000313|EMBL:KNA19776.1};	--	--	--
gene-LOC110690639	0.34	0.29	1.63	0.03	0	0	13	11	61	1	0	0	0.016	-6.006	6.63609e-05	0.00119382	down	NW_018744062.1	215105	219404	+	LOC110690639	--	K15803 (-)-germacrene D synthase [EC:4.2.3.75] | (RefSeq) 5-epiaristolochene synthase-like (A)	viridiflorene synthase-like isoform X1 [Chenopodium quinoa]	RecName: Full=Probable terpene synthase 6; Short=RcSeTPS6; EC=4.2.3.-;	SubName: Full=Uncharacterized protein {ECO:0000313|EMBL:KNA11925.1};	--	GO:0000287,magnesium ion binding; GO:0010333,terpene synthase activity; GO:0008152,metabolic process	Terpene synthase family, metal binding domain
gene-LOC110690640	2.73	1.01	8.89	1.07	0.66	0.63	113	41	362	42	29	24	0.225	-2.149	0.000916721	0.0103391	down	NW_018744062.1	260865	270098	+	LOC110690640	--	--	WEB family protein At2g38370-like [Chenopodium quinoa]	RecName: Full=WEB family protein At2g38370;	SubName: Full=Uncharacterized protein {ECO:0000313|EMBL:KNA20692.1};	--	GO:0005829,cytosol; GO:0009904,chloroplast accumulation movement; GO:0009903,chloroplast avoidance movement	Weak chloroplast movement under blue light
gene-LOC110690652	4.09	3.84	5.02	1.19	1.14	0.71	232	214	280	64	69	37	0.257	-1.96	2.98763e-11	2.05904e-09	down	NW_018742329.1	4611633	4622369	-	LOC110690652	--	K15333 tRNA guanosine-2'-O-methyltransferase [EC:2.1.1.34] | (RefSeq) uncharacterized protein LOC104224633 (A)	subtilisin-like protease SBT5.6 [Chenopodium quinoa]	RecName: Full=Subtilisin-like protease SBT5.6 {ECO:0000303|PubMed:16193095}; EC=3.4.21.- {ECO:0000255|PROSITE-ProRule:PRU10082}; AltName: Full=Subtilase subfamily 5 member 6 {ECO:0000303|PubMed:16193095}; Short=AtSBT5.6 {ECO:0000303|PubMed:16193095}; Flags: Precursor;	SubName: Full=Uncharacterized protein {ECO:0000313|EMBL:KNA09728.1};	--	GO:0005576,extracellular region; GO:0004252,serine-type endopeptidase activity	Subtilase family
gene-LOC110690663	67.4	53.91	71.15	48.35	16.53	13.11	1060	833	1101	722	278	189	0.425	-1.236	0.00647191	0.0441395	down	NW_018744062.1	762517	764725	-	LOC110690663	--	K02976 small subunit ribosomal protein S26e | (RefSeq) 40S ribosomal protein S26-1-like (A)	40S ribosomal protein S26-1-like [Chenopodium quinoa]	RecName: Full=40S ribosomal protein S26-1;	RecName: Full=40S ribosomal protein S26 {ECO:0000256|RuleBase:RU363128};	40s ribosomal protein S26	GO:0022627,cytosolic small ribosomal subunit; GO:0003729,mRNA binding; GO:0003735,structural constituent of ribosome; GO:0006412,translation	Ribosomal protein S26e
gene-LOC110690681	281.21	217.07	287.81	200.48	82.03	85.98	5305	4023	5342	3591	1655	1487	0.497	-1.009	0.00379088	0.0300412	down	NW_018744062.1	1003624	1006050	-	LOC110690681	--	K02947 small subunit ribosomal protein S10e | (RefSeq) 40S ribosomal protein S10-3-like (A)	40S ribosomal protein S10-3-like [Chenopodium quinoa]	RecName: Full=40S ribosomal protein S10-3;	SubName: Full=Uncharacterized protein {ECO:0000313|EMBL:KNA17791.1};	40s ribosomal protein s10	GO:0005618,cell wall; GO:0022626,cytosolic ribosome; GO:0022627,cytosolic small ribosomal subunit; GO:0016020,membrane; GO:0042788,polysomal ribosome; GO:0003729,mRNA binding; GO:0003723,RNA binding; GO:0003735,structural constituent of ribosome; GO:0000028,ribosomal small subunit assembly	Plectin/S10 domain
gene-LOC110690704	85.76	58.25	81.03	55.61	24.77	21.32	1803	1203	1676	1110	557	411	0.48	-1.06	0.00397617	0.0310956	down	NW_018744062.1	1320602	1325918	+	LOC110690704	--	K02356 elongation factor P | (RefSeq) uncharacterized protein LOC110690704 (A)	uncharacterized protein LOC110690704 [Chenopodium quinoa]	--	SubName: Full=Uncharacterized protein {ECO:0000313|EMBL:CBI18035.3};	--	GO:0005737,cytoplasm; GO:0003746,translation elongation factor activity	Elongation factor P (EF-P) KOW-like domain
gene-LOC110690756	5.3	3.97	6.38	3.71	1.34	1.99	200	147	237	133	54	69	0.485	-1.044	0.00611953	0.0423313	down	NW_018742329.1	5106281	5109819	-	LOC110690756	--	K01230 mannosyl-oligosaccharide alpha-1,2-mannosidase [EC:3.2.1.113] | (RefSeq) mannosyl-oligosaccharide 1,2-alpha-mannosidase MNS1 (A)	uncharacterized protein LOC110690756 [Chenopodium quinoa]	--	SubName: Full=Putative HAT dimerization domain, Ribonuclease H-like domain protein {ECO:0000313|EMBL:OTG22452.1};	--	GO:0046983,protein dimerization activity	hAT family C-terminal dimerisation region
gene-LOC110690785	0.23	0.67	0.75	0.06	0.12	0.05	16	45	51	4	9	3	0.157	-2.669	0.000491669	0.00625964	down	NW_018742329.1	5296594	5300860	+	LOC110690785	--	--	uncharacterized protein LOC110690785 [Chenopodium quinoa]	--	SubName: Full=Uncharacterized protein {ECO:0000313|EMBL:KNA17427.1};	--	--	--
gene-LOC110690849	5.86	4.52	5.61	3.23	1.67	1.87	466	353	439	244	142	136	0.452	-1.146	0.000122472	0.00199774	down	NW_018744066.1	297142	301478	+	LOC110690849	--	K17710 pentatricopeptide repeat domain-containing protein 1 | (RefSeq) pentatricopeptide repeat-containing protein At2g18940, chloroplastic-like (A)	pentatricopeptide repeat-containing protein At2g18940, chloroplastic-like [Chenopodium quinoa]	RecName: Full=Pentatricopeptide repeat-containing protein At2g18940, chloroplastic; Flags: Precursor;	SubName: Full=Uncharacterized protein {ECO:0000313|EMBL:KNA25392.1};	FOG: PPR repeat	GO:0009507,chloroplast; GO:0043231,intracellular membrane-bounded organelle; GO:0004519,endonuclease activity; GO:0003729,mRNA binding; GO:0003723,RNA binding; GO:0009451,RNA modification	PPR repeat family
gene-LOC110690869	7.97	5.72	13.4	6	2.68	2.26	200	141	331	143	72	52	0.447	-1.163	0.00497729	0.036491	down	NW_018744066.1	537346	543007	-	LOC110690869	--	K19306 18S rRNA (guanine1575-N7)-methyltransferase [EC:2.1.1.309] | (RefSeq) probable 18S rRNA (guanine-N(7))-methyltransferase (A)	probable 18S rRNA (guanine-N(7))-methyltransferase [Chenopodium quinoa]	RecName: Full=18S rRNA (guanine-N(7))-methyltransferase RID2 {ECO:0000305}; EC=2.1.1.309 {ECO:0000250|UniProtKB:P25627}; AltName: Full=Protein ROOT INITIATION DEFECTIVE 2 {ECO:0000303|PubMed:14522871};	SubName: Full=S-adenosyl-L-methionine-dependent methyltransferases superfamily protein isoform 1 {ECO:0000313|EMBL:EOY31953.1};	Predicted protein carboxyl methylase	GO:0005730,nucleolus; GO:0005654,nucleoplasm; GO:0005634,nucleus; GO:0048471,perinuclear region of cytoplasm; GO:0016435,rRNA (guanine) methyltransferase activity; GO:1990110,callus formation; GO:0048527,lateral root development; GO:0010078,maintenance of root meristem identity; GO:0048364,root development; GO:0070476,rRNA (guanine-N7)-methylation; GO:0006364,rRNA processing	Methyltransferase involved in Williams-Beuren syndrome
gene-LOC110690882	247.89	192.02	295.45	175.78	82.49	71.07	6544	4980	7674	4406	2329	1720	0.481	-1.056	0.00153135	0.0153687	down	NW_018744066.1	753074	756459	+	LOC110690882	--	K02932 large subunit ribosomal protein L5e | (RefSeq) 60S ribosomal protein L5-like (A)	60S ribosomal protein L5-like [Chenopodium quinoa]	RecName: Full=60S ribosomal protein L5;	SubName: Full=Uncharacterized protein {ECO:0000313|EMBL:KNA10155.1};	60S ribosomal protein L5	GO:0005634,nucleus; GO:0005840,ribosome; GO:0008097,5S rRNA binding; GO:0003735,structural constituent of ribosome; GO:0006412,translation	Ribosomal large subunit proteins 60S L5, and 50S L18
gene-LOC110690988	9.64	9.94	14.4	5.84	3.33	3.28	311	315	457	179	115	97	0.399	-1.326	1.62163e-06	4.52385e-05	down	NW_018744066.1	2266661	2270625	-	LOC110690988	--	K14484 auxin-responsive protein IAA | (RefSeq) auxin-responsive protein IAA27-like (A)	auxin-responsive protein IAA27-like [Chenopodium quinoa]	RecName: Full=Auxin-responsive protein IAA27; AltName: Full=Auxin-induced protein 27; AltName: Full=Indoleacetic acid-induced protein 27; AltName: Full=Phytochrome-associated protein 2;	RecName: Full=Auxin-responsive protein {ECO:0000256|RuleBase:RU004549};	--	GO:0005634,nucleus; GO:0003700,DNA-binding transcription factor activity; GO:0009734,auxin-activated signaling pathway; GO:0009733,response to auxin; GO:0006351,transcription, DNA-templated	AUX/IAA family
gene-LOC110690991	6.97	4.7	10.51	4.98	1.92	1.76	190	126	282	129	56	44	0.428	-1.225	0.00523565	0.0378049	down	NW_018744066.1	2322289	2325542	+	LOC110690991	--	K04392 Ras-related C3 botulinum toxin substrate 1 | (RefSeq) rac-like GTP-binding protein ARAC7 (A)	rac-like GTP-binding protein ARAC7 [Chenopodium quinoa]	RecName: Full=Rac-like GTP-binding protein ARAC7; AltName: Full=GTPase protein ROP9;	SubName: Full=Uncharacterized protein {ECO:0000313|EMBL:KNA17668.1};	Ras-related small GTPase, Rho type	GO:0005622,intracellular; GO:0005886,plasma membrane; GO:0005525,GTP binding; GO:0003924,GTPase activity; GO:0009738,abscisic acid-activated signaling pathway; GO:0007264,small GTPase mediated signal transduction	Ras family
gene-LOC110690999	2.39	0.83	4.38	0.66	0.24	0.33	103	35	186	27	11	13	0.185	-2.433	7.31374e-05	0.00129232	down	NW_018744066.1	2414929	2417087	+	LOC110690999	--	--	uncharacterized protein LOC110690999 [Chenopodium quinoa]	--	SubName: Full=Uncharacterized protein {ECO:0000313|EMBL:KNA09414.1};	--	--	--
gene-LOC110691109	0.62	1.1	0.44	0	0	0	20	35	14	0	0	0	0.008	-6.914	4.08549e-06	0.000103045	down	NW_018744066.1	1186854	1189134	-	LOC110691109	--	--	--	--	--	--	--	--
gene-LOC110691191	0.58	0.42	0.56	0.13	0	0	24	17	23	5	0	0	0.083	-3.591	0.00210842	0.0195503	down	NW_018744072.1	56149	58676	-	LOC110691191	--	--	uncharacterized protein LOC110691191 [Chenopodium quinoa]	RecName: Full=F-box protein At5g49610;	SubName: Full=Uncharacterized protein {ECO:0000313|EMBL:KNA24624.1};	--	GO:0016567,protein ubiquitination	F-box domain
gene-LOC110691262	23.19	12.88	21.16	7.26	4.42	2.74	1281	699	1150	381	261	139	0.272	-1.879	5.14077e-07	1.62323e-05	down	NW_018744072.1	2574783	2577546	+	LOC110691262	--	K10525 allene oxide cyclase [EC:5.3.99.6] | (RefSeq) allene oxide cyclase, chloroplastic-like (A)	allene oxide cyclase, chloroplastic-like [Chenopodium quinoa]	RecName: Full=Allene oxide cyclase, chloroplastic {ECO:0000303|Ref.1, ECO:0000303|Ref.2}; Short=OsAOC {ECO:0000303|Ref.1}; EC=5.3.99.6 {ECO:0000269|PubMed:23347338}; AltName: Full=Protein COLEOPTILE PHOTOMORPHOGENESIS 2 {ECO:0000303|PubMed:23347338}; AltName: Full=Protein HEBIBA {ECO:0000303|PubMed:14605232}; Flags: Precursor;	SubName: Full=Uncharacterized protein {ECO:0000313|EMBL:ABK96763.1};	--	GO:0009507,chloroplast; GO:0046423,allene-oxide cyclase activity; GO:0009734,auxin-activated signaling pathway; GO:0007623,circadian rhythm; GO:0050832,defense response to fungus; GO:0080186,developmental vegetative growth; GO:0009908,flower development; GO:0009864,induced systemic resistance, jasmonic acid mediated signaling pathway; GO:0009695,jasmonic acid biosynthetic process; GO:0048573,phot…	Allene oxide cyclase
gene-LOC110691319	2.23	1.25	1.07	0	0	0	40	22	19	0	0	0	0.007	-7.087	7.59441e-07	2.29888e-05	down	NW_018744072.1	1933885	1936234	+	LOC110691319	--	--	--	--	--	--	--	--
gene-LOC110691386	57.01	37.99	43.19	19.58	11.75	20.94	1874	1227	1397	611	413	631	0.406	-1.3	6.97405e-05	0.00124348	down	NW_018744080.1	322573	327700	+	LOC110691386	--	K13415 protein brassinosteroid insensitive 1 [EC:2.7.10.1 2.7.11.1] | (RefSeq) uncharacterized protein LOC103413440 isoform X1 (A)	squamosa promoter-binding-like protein 17 isoform X1 [Chenopodium quinoa]	RecName: Full=Squamosa promoter-binding-like protein 17;	SubName: Full=Uncharacterized protein {ECO:0000313|EMBL:KNA10822.1};	--	GO:0005634,nucleus; GO:0003677,DNA binding; GO:0046872,metal ion binding; GO:0006355,regulation of transcription, DNA-templated; GO:0006351,transcription, DNA-templated	SBP domain
gene-LOC110691403	250.15	198.13	251.44	156.35	67.97	78.38	5079	3952	5023	3014	1476	1459	0.459	-1.123	0.000433179	0.00564978	down	NW_018744080.1	724529	727218	+	LOC110691403	--	K02934 large subunit ribosomal protein L6e | (RefSeq) 60S ribosomal protein L6-like (A)	60S ribosomal protein L6-like [Chenopodium quinoa]	RecName: Full=60S ribosomal protein L6; AltName: Full=YL16-like;	RecName: Full=60S ribosomal protein L6 {ECO:0000256|RuleBase:RU000662};	60s ribosomal protein L6	GO:0005840,ribosome; GO:0003735,structural constituent of ribosome; GO:0006412,translation	Ribosomal protein L6e
gene-LOC110691414	2.2	1.12	6.99	1.27	0.12	0.61	102	51	318	56	6	26	0.225	-2.152	0.00629459	0.0431507	down	NW_018744080.1	887949	890470	+	LOC110691414	--	--	--	--	--	--	--	--
gene-LOC110691429	4.79	5.07	7.35	1.81	1.75	2.69	223	232	337	80	87	115	0.404	-1.306	2.79789e-05	0.000566187	down	NW_018744080.1	1504194	1508912	-	LOC110691429	--	--	transcription factor bHLH130-like [Chenopodium quinoa]	RecName: Full=Transcription factor bHLH130; AltName: Full=Basic helix-loop-helix protein 130; Short=AtbHLH130; Short=bHLH 130; AltName: Full=Transcription factor EN 69; AltName: Full=bHLH transcription factor bHLH130;	SubName: Full=Uncharacterized protein {ECO:0000313|EMBL:KNA10511.1};	--	GO:0005634,nucleus; GO:0001046,core promoter sequence-specific DNA binding; GO:0003700,DNA-binding transcription factor activity; GO:0046983,protein dimerization activity; GO:0001228,DNA-binding transcription activator activity, RNA polymerase II-specific; GO:0048573,photoperiodism, flowering; GO:0006355,regulation of transcription, DNA-templated; GO:0006366,transcription by RNA polymerase II	Helix-loop-helix DNA-binding domain
gene-LOC110691436	3.79	0.27	6.91	0.07	0.06	0.21	58	4	104	1	1	3	0.038	-4.723	5.33348e-05	0.000992165	down	NW_018744080.1	1663539	1675226	+	LOC110691436	--	--	uncharacterized protein LOC110691436 [Chenopodium quinoa]	RecName: Full=Trypsin inhibitor 2; AltName: Full=SOTI II; AltName: Full=Trypsin inhibitor II;	SubName: Full=Uncharacterized protein {ECO:0000313|EMBL:KNA13657.1};	--	GO:0004867,serine-type endopeptidase inhibitor activity	Trypsin inhibitors 1,2 and 3
gene-LOC110691453	7.47	7.45	7.87	1.82	1.09	2.11	328	321	340	76	51	85	0.237	-2.078	5.30834e-10	2.89894e-08	down	NW_018744080.1	1987251	1998254	+	LOC110691453	--	K08266 target of rapamycin complex subunit LST8 | (RefSeq) protein LST8 homolog (A)	protein LST8 homolog [Chenopodium quinoa]	RecName: Full=Dynein assembly factor with WDR repeat domains 1; AltName: Full=Outer row dynein assembly protein 16;	SubName: Full=Uncharacterized protein {ECO:0000313|EMBL:KNA19762.1};	G-protein beta subunit-like protein (contains WD40 repeats)	GO:0005737,cytoplasm; GO:0005856,cytoskeleton; GO:0031514,motile cilium	WD domain, G-beta repeat
gene-LOC110691474	5.99	3.78	5.15	0.14	0.31	0.18	181	112	153	4	10	5	0.047	-4.407	6.61222e-18	1.32792e-15	down	NW_018744080.1	2556036	2558485	-	LOC110691474	--	--	--	--	--	--	--	--
gene-LOC110691488	424.92	320.29	462.34	280.05	125.97	112.42	9553	7074	10227	5978	3029	2317	0.458	-1.126	0.00101205	0.0111141	down	NW_018744080.1	2899838	2901990	+	LOC110691488	--	K02981 small subunit ribosomal protein S2e | (RefSeq) 40S ribosomal protein S2-4-like (A)	40S ribosomal protein S2-4-like [Chenopodium quinoa]	RecName: Full=40S ribosomal protein S2-2;	SubName: Full=Uncharacterized protein {ECO:0000313|EMBL:KNA19414.1};	40S ribosomal protein S2/30S ribosomal protein S5	GO:0005618,cell wall; GO:0022627,cytosolic small ribosomal subunit; GO:0016020,membrane; GO:0009506,plasmodesma; GO:0003729,mRNA binding; GO:0003735,structural constituent of ribosome; GO:0006412,translation	Ribosomal protein S5, N-terminal domain
gene-LOC110691501	1.15	1.43	1.57	0	0	0	41	50	55	0	0	0	0.004	-7.908	1.17263e-09	6.02508e-08	down	NW_018744080.1	3090824	3093275	+	LOC110691501	--	--	--	--	--	--	--	--
gene-LOC110691615	22.99	18.36	29.41	0.26	0.09	0.05	464	364	584	5	2	1	0.006	-7.306	4.22751e-37	4.78528e-34	down	NW_018744080.1	4081431	4084887	+	LOC110691615	--	K01070 S-formylglutathione hydrolase [EC:3.1.2.12] | (RefSeq) S-formylglutathione hydrolase-like (A)	S-formylglutathione hydrolase-like [Chenopodium quinoa]	RecName: Full=S-formylglutathione hydrolase; Short=AtSFGH; EC=3.1.2.12; AltName: Full=Esterase D;	RecName: Full=S-formylglutathione hydrolase {ECO:0000256|RuleBase:RU363068}; EC=3.1.2.12 {ECO:0000256|RuleBase:RU363068};	Esterase D	GO:0048046,apoplast; GO:0052689,carboxylic ester hydrolase activity; GO:0018738,S-formylglutathione hydrolase activity; GO:0046294,formaldehyde catabolic process; GO:0046686,response to cadmium ion	Putative esterase
gene-LOC110691682	4.66	6.65	2.93	0	0.04	0	97	136	60	0	1	0	0.004	-8.033	1.55914e-09	7.87028e-08	down	NW_018744092.1	297763	299415	+	LOC110691682	--	K15918 D-glycerate 3-kinase [EC:2.7.1.31] | (RefSeq) D-glycerate 3-kinase, chloroplastic-like (A)	D-glycerate 3-kinase, chloroplastic-like, partial [Chenopodium quinoa]	RecName: Full=D-glycerate 3-kinase, chloroplastic {ECO:0000305}; Short=AtGLYK {ECO:0000303|PubMed:15980259}; EC=2.7.1.31 {ECO:0000269|PubMed:15980259}; Flags: Precursor;	SubName: Full=Uncharacterized protein {ECO:0000313|EMBL:KNA12067.1};	Predicted kinase	GO:0009507,chloroplast; GO:0009941,chloroplast envelope; GO:0009570,chloroplast stroma; GO:0005737,cytoplasm; GO:0005829,cytosol; GO:0005524,ATP binding; GO:0008887,glycerate kinase activity; GO:0004849,uridine kinase activity; GO:0009854,oxidative photosynthetic carbon pathway; GO:0009853,photorespiration; GO:0006206,pyrimidine nucleobase metabolic process; GO:0043097,pyrimidine nucleoside salva…	SRP54-type protein, GTPase domain
gene-LOC110691747	0.96	0.93	1.42	0.44	0.47	0.5	46	44	67	20	24	22	0.473	-1.08	0.00687791	0.046175	down	NW_018744092.1	806528	808933	+	LOC110691747	--	--	uncharacterized protein LOC110691747 [Chenopodium quinoa]	RecName: Full=Protein NUCLEAR FUSION DEFECTIVE 4 {ECO:0000303|PubMed:16698901};	SubName: Full=Uncharacterized protein {ECO:0000313|EMBL:KNA05260.1};	--	GO:0016021,integral component of membrane; GO:0000741,karyogamy; GO:0010197,polar nucleus fusion; GO:0009651,response to salt stress	Nodulin-like
gene-LOC110691761	18.37	18.8	23.63	2.92	4.29	5.64	192	193	243	29	48	54	0.235	-2.09	1.68406e-08	7.05227e-07	down	NW_018744092.1	1026056	1027110	+	LOC110691761	--	--	--	--	--	--	--	--
gene-LOC110691791	9.25	6.16	8.74	5.61	1.75	1.45	257	168	239	148	52	37	0.383	-1.385	0.00609628	0.0422174	down	NW_018744092.1	1664707	1667571	+	LOC110691791	--	K01456 peptide-N4-(N-acetyl-beta-glucosaminyl)asparagine amidase [EC:3.5.1.52] | (RefSeq) peptide-N(4)-(N-acetyl-beta- glucosaminyl)asparagine amidase isoform X1 (A)	probable aldo-keto reductase 4 [Chenopodium quinoa]	RecName: Full=Probable aldo-keto reductase 2; EC=1.1.1.-;	SubName: Full=Uncharacterized protein {ECO:0000313|EMBL:KNA12253.1};	Voltage-gated shaker-like K+ channel, subunit beta/KCNAB	GO:0016491,oxidoreductase activity	Aldo/keto reductase family
gene-LOC110691828	10.33	3.62	22.81	4.91	3.56	3.07	572	197	1243	258	211	156	0.372	-1.427	0.00472516	0.0351938	down	NW_018744092.1	2360474	2367545	-	LOC110691828	--	K09487 heat shock protein 90kDa beta | (RefSeq) heat shock protein 90-6, mitochondrial-like isoform X1 (A)	heat shock protein 90-6, mitochondrial-like isoform X1 [Chenopodium quinoa]	RecName: Full=Heat shock protein 90-6, mitochondrial {ECO:0000305}; Short=AtHSP90.6 {ECO:0000305}; Short=AtHsp90-6 {ECO:0000303|PubMed:11599565}; AltName: Full=Heat shock protein 89-1 {ECO:0000305}; Short=Hsp89-1 {ECO:0000303|PubMed:11599565}; Flags: Precursor;	SubName: Full=Uncharacterized protein {ECO:0000313|EMBL:KNA10954.1};	Molecular chaperone (HSP90 family)	GO:0005618,cell wall; GO:0009570,chloroplast stroma; GO:0005739,mitochondrion; GO:0005524,ATP binding; GO:0051082,unfolded protein binding; GO:0006457,protein folding; GO:0006950,response to stress	Hsp90 protein
gene-LOC110691875	221.77	188.89	212.89	154.75	72.77	62.58	3479	2911	3286	2305	1221	900	0.49	-1.03	0.003109	0.0260974	down	NW_018744092.1	3297889	3300240	-	LOC110691875	--	K02893 large subunit ribosomal protein L23Ae | (RefSeq) 60S ribosomal protein L23A (A)	60S ribosomal protein L23A [Chenopodium quinoa]	RecName: Full=60S ribosomal protein L23a;	SubName: Full=Uncharacterized protein {ECO:0000313|EMBL:EEF05190.1};	60s ribosomal protein L23	GO:0005840,ribosome; GO:0019843,rRNA binding; GO:0003735,structural constituent of ribosome; GO:0006412,translation	Ribosomal protein L23, N-terminal domain
gene-LOC110691882	3.56	1.13	3.74	0.35	0.48	0.55	119	37	123	11	17	17	0.188	-2.413	1.32951e-05	0.000295434	down	NW_018744092.1	3361634	3367979	-	LOC110691882	--	K09458 3-oxoacyl-[acyl-carrier-protein] synthase II [EC:2.3.1.179] | (RefSeq) 3-oxoacyl-[acyl-carrier-protein] synthase, mitochondrial-like (A)	3-oxoacyl-[acyl-carrier-protein]	RecName: Full=3-oxoacyl-[acyl-carrier-protein] synthase, mitochondrial; EC=2.3.1.41; AltName: Full=Beta-ketoacyl-ACP synthase; AltName: Full=mtKAS; Flags: Precursor;	RecName: Full=3-oxoacyl-[acyl-carrier-protein] synthase {ECO:0000256|PIRNR:PIRNR000447};	3-oxoacyl-(acyl-carrier-protein) synthase (I and II)	GO:0005739,mitochondrion; GO:0004315,3-oxoacyl-[acyl-carrier-protein] synthase activity; GO:0006633,fatty acid biosynthetic process; GO:0010027,thylakoid membrane organization	Beta-ketoacyl synthase, N-terminal domain
gene-LOC110692111	1.5	1.73	2.24	0	0	0	160	181	235	0	0	0	0.001	-9.873	8.33527e-16	1.24542e-13	down	NW_018744093.1	840205	848596	+	LOC110692111	--	--	uncharacterized protein LOC110692111 [Chenopodium quinoa]	--	SubName: Full=uncharacterized protein LOC104600335 isoform X4 {ECO:0000313|RefSeq:XP_010261527.1};	--	--	Plant transposase (Ptta/En/Spm family)
gene-LOC110692128	1.71	0.55	4.53	0.55	0.28	0.38	121	38	316	37	21	25	0.213	-2.23	0.000481042	0.0061516	down	NW_018744093.1	2019535	2025946	+	LOC110692128	--	--	kinase-interacting family protein-like [Chenopodium quinoa]	RecName: Full=Kinase-interacting family protein {ECO:0000305|PubMed:22840520}; Short=KIP1-like family protein {ECO:0000305|PubMed:22840520};	SubName: Full=Uncharacterized protein {ECO:0000313|EMBL:KNA08039.1};	--	GO:0005737,cytoplasm; GO:0003779,actin binding	KIP1-like protein
gene-LOC110692140	6.15	7.35	7.34	2.7	1.79	2.34	103	121	121	43	32	36	0.352	-1.508	1.53007e-05	0.000333455	down	NW_018744093.1	2656999	2660551	+	LOC110692140	--	--	uncharacterized protein LOC110692140 [Chenopodium quinoa]	--	SubName: Full=Uncharacterized protein {ECO:0000313|EMBL:KNA10353.1};	--	GO:0016021,integral component of membrane	--
gene-LOC110692151	1.48	1.66	1.41	0.65	0.65	0.76	96	106	90	40	45	45	0.484	-1.046	0.00539807	0.038643	down	NW_018744093.1	3116955	3127676	+	LOC110692151	--	--	probable folate-biopterin transporter 3 [Chenopodium quinoa]	RecName: Full=Probable folate-biopterin transporter 3;	SubName: Full=Uncharacterized protein {ECO:0000313|EMBL:KNA13644.1};	--	GO:0016021,integral component of membrane	BT1 family
gene-LOC110692153	1.79	2.03	1.95	1.01	0.65	0.56	69	77	74	37	27	20	0.412	-1.28	0.00150716	0.0151911	down	NW_018744093.1	3127808	3130821	-	LOC110692153	--	K22683 aspartyl protease family protein [EC:3.4.23.-] | (RefSeq) aspartyl protease family protein 2 (A)	aspartyl protease family protein At5g10770-like [Chenopodium quinoa]	RecName: Full=Aspartyl protease family protein At5g10770; EC=3.4.23.- {ECO:0000305}; Flags: Precursor;	SubName: Full=Uncharacterized protein {ECO:0000313|EMBL:KNA13645.1};	Aspartyl protease	GO:0031225,anchored component of membrane; GO:0005886,plasma membrane; GO:0004190,aspartic-type endopeptidase activity; GO:0030163,protein catabolic process; GO:0006508,proteolysis	Xylanase inhibitor N-terminal
gene-LOC110692225	1.1	0.35	1.17	0	0	0	19	6	20	0	0	0	0.014	-6.145	9.51677e-05	0.00161366	down	NW_018744093.1	3245252	3247327	+	LOC110692225	--	--	--	--	--	--	--	--
gene-LOC110692271	9.96	10.72	6.47	3.43	4.5	3.12	352	372	225	115	170	101	0.429	-1.221	0.00338449	0.027676	down	NW_018744100.1	576339	582589	+	LOC110692271	--	K09833 homogentisate phytyltransferase / homogentisate geranylgeranyltransferase [EC:2.5.1.115 2.5.1.116] | (RefSeq) homogentisate phytyltransferase 1, chloroplastic-like (A)	homogentisate phytyltransferase 1, chloroplastic-like [Chenopodium quinoa]	RecName: Full=Homogentisate phytyltransferase 1, chloroplastic; Short=AtHPT1; EC=2.5.1.115; AltName: Full=Tocopherol polyprenyltransferase 1; AltName: Full=Vitamin E pathway gene 2-1 protein; Short=AtVTE2-1; Flags: Precursor;	SubName: Full=Uncharacterized protein {ECO:0000313|EMBL:KNA23057.1};	--	GO:0009507,chloroplast; GO:0031969,chloroplast membrane; GO:0016021,integral component of membrane; GO:0010176,homogentisate phytyltransferase activity; GO:0071555,cell wall organization; GO:0009915,phloem sucrose loading; GO:0031347,regulation of defense response; GO:0009266,response to temperature stimulus; GO:0006636,unsaturated fatty acid biosynthetic process; GO:0010189,vitamin E biosyntheti…	UbiA prenyltransferase family
gene-LOC110692288	14.87	11.12	21.22	11.42	5.22	4.86	354	260	497	258	133	106	0.497	-1.008	0.00445863	0.0336937	down	NW_018744100.1	724020	729769	-	LOC110692288	--	K19306 18S rRNA (guanine1575-N7)-methyltransferase [EC:2.1.1.309] | (RefSeq) probable 18S rRNA (guanine-N(7))-methyltransferase (A)	probable 18S rRNA (guanine-N(7))-methyltransferase [Chenopodium quinoa]	RecName: Full=18S rRNA (guanine-N(7))-methyltransferase RID2 {ECO:0000305}; EC=2.1.1.309 {ECO:0000250|UniProtKB:P25627}; AltName: Full=Protein ROOT INITIATION DEFECTIVE 2 {ECO:0000303|PubMed:14522871};	SubName: Full=S-adenosyl-L-methionine-dependent methyltransferases superfamily protein isoform 1 {ECO:0000313|EMBL:EOY31953.1};	Predicted protein carboxyl methylase	GO:0005730,nucleolus; GO:0005654,nucleoplasm; GO:0005634,nucleus; GO:0048471,perinuclear region of cytoplasm; GO:0016435,rRNA (guanine) methyltransferase activity; GO:1990110,callus formation; GO:0048527,lateral root development; GO:0010078,maintenance of root meristem identity; GO:0048364,root development; GO:0070476,rRNA (guanine-N7)-methylation; GO:0006364,rRNA processing	Methyltransferase involved in Williams-Beuren syndrome
gene-LOC110692289	9.12	10.87	12.09	7.44	3.59	3.7	164	192	214	127	69	61	0.488	-1.035	0.00336869	0.0276013	down	NW_018744100.1	731673	733844	-	LOC110692289	--	K01047 secretory phospholipase A2 [EC:3.1.1.4] | (RefSeq) phospholipase A2-alpha-like (A)	phospholipase A2-alpha-like [Chenopodium quinoa]	RecName: Full=Phospholipase A2-alpha {ECO:0000303|PubMed:16140037}; EC=3.1.1.4 {ECO:0000269|PubMed:16140037}; AltName: Full=Secretory phospholipase A2-alpha; Short=AtsPLA2-alpha; Flags: Precursor;	SubName: Full=Uncharacterized protein {ECO:0000313|EMBL:KNA21363.1};	--	GO:0031410,cytoplasmic vesicle; GO:0005576,extracellular region; GO:0005794,Golgi apparatus; GO:0005634,nucleus; GO:0005773,vacuole; GO:0005509,calcium ion binding; GO:0004623,phospholipase A2 activity; GO:0102567,phospholipase A2 activity (consuming 1,2-dipalmitoylphosphatidylcholine); GO:0102568,phospholipase A2 activity consuming 1,2-dioleoylphosphatidylethanolamine); GO:0050482,arachidonic ac…	Phospholipase A2
gene-LOC110692392	183.22	162.52	158.36	0.03	0.09	0.21	5763	5022	4901	1	3	6	0.001	-10.483	1.87555e-79	3.50297e-75	down	NW_018744111.1	957637	960397	-	LOC110692392	--	K09060 plant G-box-binding factor | (RefSeq) bZIP transcription factor 16-like (A)	UV-B-induced protein At3g17800, chloroplastic-like [Chenopodium quinoa]	RecName: Full=UV-B-induced protein At3g17800, chloroplastic {ECO:0000305}; Flags: Precursor;	SubName: Full=Uncharacterized protein {ECO:0000313|EMBL:KNA17639.1};	--	GO:0009507,chloroplast; GO:0010193,response to ozone; GO:0010224,response to UV-B; GO:0009611,response to wounding	Protein of unknown function (DUF760)
gene-LOC110692408	17.78	11.87	14.37	5.84	4.56	4.06	215	141	171	67	59	45	0.354	-1.497	4.13321e-06	0.000104108	down	NW_018744111.1	85183	88107	-	LOC110692408	--	--	--	--	--	--	--	--
gene-LOC110692429	5.79	4.6	6.6	1.41	2.26	1.71	355	277	398	82	148	96	0.354	-1.499	2.07242e-06	5.65059e-05	down	NW_018744111.1	2219055	2236528	+	LOC110692429	--	--	--	--	--	--	--	--
gene-LOC110692481	51.81	25.57	92.36	21.33	10.49	8.8	2139	1037	3752	836	463	333	0.271	-1.882	1.11401e-05	0.000251133	down	NW_018744113.1	1349414	1354382	-	LOC110692481	--	K04077 chaperonin GroEL | (RefSeq) chaperonin CPN60, mitochondrial-like (A)	chaperonin CPN60, mitochondrial-like [Chenopodium quinoa]	RecName: Full=Chaperonin CPN60, mitochondrial; AltName: Full=HSP60; Flags: Precursor;	SubName: Full=Uncharacterized protein {ECO:0000313|EMBL:KNA24891.1};	Mitochondrial chaperonin, Cpn60/Hsp60p	GO:0005829,cytosol; GO:0022626,cytosolic ribosome; GO:0005759,mitochondrial matrix; GO:0005739,mitochondrion; GO:0042788,polysomal ribosome; GO:0005774,vacuolar membrane; GO:0005524,ATP binding; GO:0005507,copper ion binding; GO:0044183,protein binding involved in protein folding; GO:0003735,structural constituent of ribosome; GO:0051082,unfolded protein binding; GO:0006458,'de novo' protein fold…	TCP-1/cpn60 chaperonin family
gene-LOC110692597	8.84	5.3	12.58	1.94	1.2	0.83	302	178	423	63	44	26	0.166	-2.591	5.97176e-12	4.61841e-10	down	NW_018742334.1	245952	250584	+	LOC110692597	--	K14826 FK506-binding nuclear protein [EC:5.2.1.8] | (RefSeq) peptidyl-prolyl cis-trans isomerase FKBP53-like (A)	peptidyl-prolyl cis-trans isomerase FKBP53-like [Chenopodium quinoa]	RecName: Full=Peptidyl-prolyl cis-trans isomerase FKBP53; Short=PPIase FKBP53; EC=5.2.1.8; AltName: Full=FK506-binding protein 53; Short=AtFKBP53; AltName: Full=Immunophilin FKBP53; AltName: Full=Rotamase;	RecName: Full=FK506-binding protein {ECO:0000256|PIRNR:PIRNR001473};	FKBP-type peptidyl-prolyl cis-trans isomerase	GO:0005829,cytosol; GO:0005730,nucleolus; GO:0005634,nucleus; GO:0005528,FK506 binding; GO:0042393,histone binding; GO:0003755,peptidyl-prolyl cis-trans isomerase activity; GO:0000412,histone peptidyl-prolyl isomerization; GO:0006334,nucleosome assembly	FKBP-type peptidyl-prolyl cis-trans isomerase
gene-LOC110692624	2.06	2.4	3.69	0.49	0.71	0.44	71	81	125	16	26	14	0.227	-2.14	3.62985e-07	1.18007e-05	down	NW_018744118.1	509106	514762	+	LOC110692624	--	--	ran GTPase-activating protein 1-like [Chenopodium quinoa]	--	SubName: Full=Uncharacterized protein {ECO:0000313|EMBL:KNA16085.1}; Flags: Fragment;	--	GO:0016021,integral component of membrane	DMPK coiled coil domain like
gene-LOC110692627	6.44	3.88	11.71	3.55	1.55	1.6	132	78	236	69	34	30	0.342	-1.549	0.00064811	0.0078424	down	NW_018742334.1	313283	317256	+	LOC110692627	--	K05019 chloride channel, nucleotide-sensitive, 1A | (RefSeq) chloride conductance regulatory protein ICln-like (A)	chloride conductance regulatory protein ICln-like [Chenopodium quinoa]	RecName: Full=Chloride conductance regulatory protein ICln; Short=I(Cln); AltName: Full=Chloride ion current inducer protein; Short=ClCI;	SubName: Full=Uncharacterized protein {ECO:0000313|EMBL:KNA17726.1};	Chloride ion current inducer protein	GO:0005829,cytosol; GO:0034709,methylosome; GO:0005634,nucleus; GO:0034715,pICln-Sm protein complex; GO:0005886,plasma membrane; GO:0006884,cell volume homeostasis; GO:0006821,chloride transport; GO:0000387,spliceosomal snRNP assembly	Regulator of volume decrease after cellular swelling
gene-LOC110692637	269.56	224.43	307.9	200.92	89.24	78.44	4191	3428	4710	2966	1484	1118	0.489	-1.031	0.00296162	0.0252	down	NW_018742334.1	320861	323014	+	LOC110692637	--	K02969 small subunit ribosomal protein S20e | (RefSeq) 40S ribosomal protein S20-2 (A)	40S ribosomal protein S20-2 [Chenopodium quinoa]	RecName: Full=40S ribosomal protein S20-2;	SubName: Full=Uncharacterized protein {ECO:0000313|EMBL:KMS95107.1};	40S ribosomal protein S20	GO:0005618,cell wall; GO:0005829,cytosol; GO:0022626,cytosolic ribosome; GO:0022627,cytosolic small ribosomal subunit; GO:0016020,membrane; GO:0005730,nucleolus; GO:0009506,plasmodesma; GO:0042788,polysomal ribosome; GO:0003729,mRNA binding; GO:0003735,structural constituent of ribosome; GO:0002181,cytoplasmic translation	Ribosomal protein S10p/S20e
gene-LOC110692663	5.9	3.38	11.45	3.23	2.15	2.35	208	117	397	108	81	76	0.429	-1.221	0.00157865	0.0157208	down	NW_018744128.1	103858	108816	+	LOC110692663	--	--	protein SLOW GREEN 1, chloroplastic-like [Chenopodium quinoa]	RecName: Full=protein SLOW GREEN 1, chloroplastic {ECO:0000303|PubMed:24420572}; Flags: Precursor;	SubName: Full=Uncharacterized protein {ECO:0000313|EMBL:KNA24360.1};	--	GO:0009507,chloroplast; GO:0009941,chloroplast envelope; GO:0009536,plastid; GO:0009658,chloroplast organization	Tetratricopeptide repeat
gene-LOC110692666	27.27	19.65	26.08	16.71	8.43	7.16	1047	741	985	609	346	252	0.471	-1.086	0.00121058	0.0128284	down	NW_018744128.1	112035	149810	+	LOC110692666	--	K15111 solute carrier family 25 (mitochondrial S-adenosylmethionine transporter), member 26 | (RefSeq) S-adenosylmethionine carrier 1, chloroplastic/mitochondrial-like isoform X1 (A)	S-adenosylmethionine carrier 1, chloroplastic/mitochondrial-like isoform X1 [Chenopodium quinoa]	RecName: Full=S-adenosylmethionine carrier 1, chloroplastic/mitochondrial; AltName: Full=S-adenosylmethionine transporter 1; Short=AtSAMT1; Flags: Precursor;	SubName: Full=Uncharacterized protein {ECO:0000313|EMBL:KNA20406.1};	Mitochondrial carrier protein PET8	GO:0009507,chloroplast; GO:0009941,chloroplast envelope; GO:0031969,chloroplast membrane; GO:0016021,integral component of membrane; GO:0005743,mitochondrial inner membrane; GO:0005739,mitochondrion; GO:0009536,plastid; GO:0000095,S-adenosyl-L-methionine transmembrane transporter activity; GO:0009658,chloroplast organization; GO:0006839,mitochondrial transport; GO:0015805,S-adenosyl-L-methionine …	Mitochondrial carrier protein
gene-LOC110692675	1.01	0.39	3.88	0.46	0.29	0.1	32	12	121	14	10	3	0.198	-2.335	0.00690235	0.0462559	down	NW_018744128.1	275072	276658	-	LOC110692675	--	K15777 4,5-DOPA dioxygenase extradiol [EC:1.13.11.-] | (RefSeq) uncharacterized protein LOC110630336 (A)	zinc-finger homeodomain protein 1-like [Chenopodium quinoa]	RecName: Full=Zinc-finger homeodomain protein 2; Short=OsZHD2;	SubName: Full=Uncharacterized protein {ECO:0000313|EMBL:GAY38767.1};	--	GO:0005634,nucleus; GO:0003677,DNA binding; GO:0046872,metal ion binding; GO:0006355,regulation of transcription, DNA-templated; GO:0006351,transcription, DNA-templated	ZF-HD protein dimerisation region
gene-LOC110692746	3.34	2.53	6.03	1.72	0.94	0.95	219	163	389	107	66	57	0.34	-1.557	6.88287e-06	0.000163447	down	NW_018744128.1	1280410	1284257	+	LOC110692746	--	K13199 plasminogen activator inhibitor 1 RNA-binding protein | (RefSeq) nuclear RNA-binding-like protein (A)	subtilisin-like protease SBT5.4 isoform X1 [Chenopodium quinoa]	RecName: Full=Subtilisin-like protease SBT5.4 {ECO:0000303|PubMed:16193095}; EC=3.4.21.- {ECO:0000305}; AltName: Full=Subtilase subfamily 5 member 4 {ECO:0000303|PubMed:16193095}; Short=AtSBT5.4 {ECO:0000303|PubMed:16193095}; Flags: Precursor;	SubName: Full=Uncharacterized protein {ECO:0000313|EMBL:KNA11376.1};	--	GO:0005783,endoplasmic reticulum; GO:0005886,plasma membrane; GO:0004252,serine-type endopeptidase activity; GO:0010074,maintenance of meristem identity; GO:0040008,regulation of growth	Fibronectin type-III domain
gene-LOC110692782	14.95	8.09	25.15	9.35	3.23	2.42	653	347	1081	388	151	97	0.345	-1.537	0.00263049	0.0230316	down	NW_018744128.1	1756961	1759146	+	LOC110692782	--	K11131 H/ACA ribonucleoprotein complex subunit 4 [EC:5.4.99.-] | (RefSeq) H/ACA ribonucleoprotein complex subunit 4-like (A)	H/ACA ribonucleoprotein complex subunit 4-like [Chenopodium quinoa]	RecName: Full=H/ACA ribonucleoprotein complex subunit 4; EC=5.4.99.-; AltName: Full=CBF5 homolog; AltName: Full=Dyskerin; AltName: Full=Nopp-140-associated protein of 57 kDa homolog; Short=AtNAP57; AltName: Full=Nucleolar protein NAP57 homolog;	SubName: Full=Uncharacterized protein {ECO:0000313|EMBL:KNA15312.1};	Pseudouridine synthase	GO:0031429,box H/ACA snoRNP complex; GO:0005829,cytosol; GO:0005730,nucleolus; GO:0009506,plasmodesma; GO:0009982,pseudouridine synthase activity; GO:0003723,RNA binding; GO:0000495,box H/ACA snoRNA 3'-end processing; GO:1990481,mRNA pseudouridine synthesis; GO:0031118,rRNA pseudouridine synthesis; GO:0031120,snRNA pseudouridine synthesis	DKCLD (NUC011) domain
gene-LOC110692805	280.93	201.26	315.21	190.83	82.18	77.68	5878	4137	6489	3791	1839	1490	0.471	-1.086	0.00177517	0.0172099	down	NW_018744128.1	1986282	1989493	+	LOC110692805	--	K02873 large subunit ribosomal protein L13e | (RefSeq) 60S ribosomal protein L13-1-like (A)	60S ribosomal protein L13-1-like [Chenopodium quinoa]	RecName: Full=60S ribosomal protein L13-2; AltName: Full=Cold-induced protein C24B;	RecName: Full=60S ribosomal protein L13 {ECO:0000256|RuleBase:RU000572};	60S Ribosomal protein L13	GO:0005840,ribosome; GO:0003735,structural constituent of ribosome; GO:0006412,translation	Ribosomal protein L13e
gene-LOC110692855	2.09	2.75	6.22	1.91	0.51	0.45	61	79	179	53	16	12	0.285	-1.81	0.00372051	0.0296008	down	NW_018742334.1	955757	958280	-	LOC110692855	--	--	cysteine-rich repeat secretory protein 11-like [Chenopodium quinoa]	RecName: Full=Cysteine-rich repeat secretory protein 3; AltName: Full=Plasmodesmata-located protein 2; Short=PDLP2; Flags: Precursor;	SubName: Full=Uncharacterized protein {ECO:0000313|EMBL:KNA06540.1};	--	GO:0016021,integral component of membrane; GO:0009506,plasmodesma; GO:0010497,plasmodesmata-mediated intercellular transport; GO:0046739,transport of virus in multicellular host	Salt stress response/antifungal
gene-LOC110692905	0.32	0.38	0.62	0.06	0	0	11	13	21	2	0	0	0.049	-4.348	0.00137663	0.0141193	down	NW_018744136.1	30407	34187	+	LOC110692905	--	K21435 ankyrin repeat domain-containing protein 6 | (RefSeq) espin (A)	ankyrin repeat-containing protein ITN1-like [Chenopodium quinoa]	RecName: Full=Ankyrin repeat-containing protein ITN1; AltName: Full=Protein INCREASED TOLERANCE TO NACL {ECO:0000303|PubMed:18643991};	SubName: Full=Uncharacterized protein {ECO:0000313|EMBL:KMS94826.1};	FOG: Ankyrin repeat	GO:0016021,integral component of membrane; GO:0005634,nucleus; GO:0005886,plasma membrane; GO:0034613,cellular protein localization; GO:0009651,response to salt stress; GO:0007165,signal transduction	Domain of unknown function
gene-LOC110692923	330.3	230.08	310.08	227.85	76.43	83.3	5043	3451	4658	3303	1248	1166	0.468	-1.095	0.00759793	0.0497482	down	NW_018742334.1	1036469	1038754	+	LOC110692923	--	K02894 large subunit ribosomal protein L23e | (RefSeq) 60S ribosomal protein L23 (A)	60S ribosomal protein L23 [Chenopodium quinoa]	RecName: Full=60S ribosomal protein L23; AltName: Full=Protein EMBRYO DEFECTIVE 2171;	SubName: Full=Uncharacterized protein {ECO:0000313|EMBL:KNA16312.1};	60S ribosomal protein L14/L17/L23	GO:0022625,cytosolic large ribosomal subunit; GO:0005730,nucleolus; GO:0070180,large ribosomal subunit rRNA binding; GO:0003735,structural constituent of ribosome; GO:0006412,translation	Ribosomal protein L14p/L23e
gene-LOC110692941	287.18	226.55	344.66	193.81	83.08	76.84	5320	4123	6282	3409	1646	1305	0.441	-1.18	0.000686331	0.00819604	down	NW_018744137.1	432997	435595	-	LOC110692941	--	K02989 small subunit ribosomal protein S5e | (RefSeq) 40S ribosomal protein S5-like (A)	40S ribosomal protein S5-like [Chenopodium quinoa]	RecName: Full=40S ribosomal protein S5; Flags: Fragment;	SubName: Full=Uncharacterized protein {ECO:0000313|EMBL:KMT16447.1};	Ribosomal protein S7	GO:0015935,small ribosomal subunit; GO:0003723,RNA binding; GO:0003735,structural constituent of ribosome; GO:0006412,translation	Ribosomal protein S7p/S5e
gene-LOC110692966	1.49	1.44	3.28	0.75	0.73	0.81	42	40	91	20	22	21	0.421	-1.248	0.00534081	0.0382992	down	NW_018742334.1	1055993	1061164	-	LOC110692966	--	--	--	--	--	--	--	--
gene-LOC110692991	1.75	0.79	7.82	0.91	0.36	0.35	115	51	505	57	25	21	0.188	-2.408	0.000833788	0.00957139	down	NW_018744137.1	937929	942636	+	LOC110692991	--	--	uncharacterized protein LOC110692991 [Chenopodium quinoa]	--	SubName: Full=Uncharacterized protein {ECO:0000313|EMBL:KNA25562.1};	--	--	--
gene-LOC110693001	47.1	20.89	92.61	5.43	0.73	1.11	1618	705	3130	177	27	35	0.05	-4.321	2.45114e-10	1.43962e-08	down	NW_018744137.1	1089700	1092844	+	LOC110693001	--	K12930 anthocyanidin 3-O-glucosyltransferase [EC:2.4.1.115] | (RefSeq) anthocyanidin 3-O-glucosyltransferase 7-like (A)	anthocyanidin 3-O-glucosyltransferase 7-like [Chenopodium quinoa]	RecName: Full=Anthocyanidin 3-O-glucosyltransferase 2; EC=2.4.1.115 {ECO:0000269|PubMed:9535914}; AltName: Full=Flavonol 3-O-glucosyltransferase; AltName: Full=UDP-glucose flavonoid 3-O-glucosyltransferase;	SubName: Full=UDP-glucose:flavonoid 3-O-glucosyltransferase {ECO:0000313|EMBL:AMQ23635.1};	UDP-glucuronosyl and UDP-glucosyl transferase	GO:0047213,anthocyanidin 3-O-glucosyltransferase activity; GO:0009718,anthocyanin-containing compound biosynthetic process; GO:0033485,cyanidin 3-O-glucoside biosynthetic process; GO:0033330,kaempferol O-glucoside biosynthetic process; GO:0033303,quercetin O-glucoside biosynthetic process	UDP-glucoronosyl and UDP-glucosyl transferase
gene-LOC110693039	2.33	2.79	17.12	2.56	0.54	0.82	68	80	492	71	17	22	0.209	-2.26	0.00344182	0.0279961	down	NW_018744137.1	1355685	1358921	+	LOC110693039	--	K09753 cinnamoyl-CoA reductase [EC:1.2.1.44] | (RefSeq) cinnamoyl-CoA reductase 1-like (A)	cinnamoyl-CoA reductase 2-like [Chenopodium quinoa]	RecName: Full=Cinnamoyl-CoA reductase-like SNL6 {ECO:0000305}; EC=1.2.-.- {ECO:0000305}; AltName: Full=Protein SUPPRESSOR OF NH1-MEDIATED LESION 6 {ECO:0000303|PubMed:20862311};	SubName: Full=Uncharacterized protein {ECO:0000313|EMBL:KNA14845.1};	Flavonol reductase/cinnamoyl-CoA reductase	GO:0003854,3-beta-hydroxy-delta5-steroid dehydrogenase activity; GO:0042742,defense response to bacterium; GO:0009809,lignin biosynthetic process; GO:0006694,steroid biosynthetic process	3-beta hydroxysteroid dehydrogenase/isomerase family
gene-LOC110693087	0.95	3.53	0.91	0	0	0	17	62	16	0	0	0	0.006	-7.419	1.89713e-06	5.20686e-05	down	NW_018744137.1	158391	172876	+	LOC110693087	--	--	--	--	--	--	--	--
gene-LOC110693111	0.51	1.16	0.06	0	0	0	9	20	1	0	0	0	0.018	-5.796	0.00388433	0.0305501	down	NW_018742334.1	1211305	1212943	-	LOC110693111	--	--	uncharacterized protein LOC110693111 [Chenopodium quinoa]	RecName: Full=Jasmonate-induced protein homolog;	SubName: Full=Uncharacterized protein {ECO:0000313|EMBL:KNA05789.1};	--	--	--
gene-LOC110693117	0.14	0.02	0.56	0	0	0	7	1	27	0	0	0	0.02	-5.643	0.00448235	0.033827	down	NW_018744137.1	269231	272368	+	LOC110693117	--	K20222 importin-5 | (RefSeq) importin-5-like isoform X1 (A)	vesicle-associated protein 3-1-like [Chenopodium quinoa]	RecName: Full=Vesicle-associated protein 1-4; AltName: Full=Plant VAP homolog 14; Short=AtPVA14; AltName: Full=VAMP-associated protein 1-4;	SubName: Full=Uncharacterized protein {ECO:0000313|EMBL:KNA18216.1};	VAMP-associated protein involved in inositol metabolism	GO:0005789,endoplasmic reticulum membrane; GO:0007165,signal transduction	MSP (Major sperm protein) domain
gene-LOC110693125	0.54	0.5	1.25	0	0	0	11	10	25	0	0	0	0.014	-6.164	5.56001e-05	0.00102969	down	NW_018744137.1	943682	946143	+	LOC110693125	--	--	--	--	--	--	--	--
gene-LOC110693145	122.47	60.98	325.8	75.33	36.47	32.57	1887	923	4939	1102	601	460	0.331	-1.594	0.00159528	0.01584	down	NW_018744143.1	100286	101513	-	LOC110693145	--	K11251 histone H2A | (RefSeq) probable histone H2A.3 (A)	probable histone H2A.3 [Chenopodium quinoa]	RecName: Full=Probable histone H2A.3; AltName: Full=HTA2;	RecName: Full=Histone H2A {ECO:0000256|RuleBase:RU003767};	Histone 2A	GO:0000790,nuclear chromatin; GO:0000786,nucleosome; GO:0005634,nucleus; GO:0003677,DNA binding; GO:0046982,protein heterodimerization activity; GO:0006342,chromatin silencing	C-terminus of histone H2A
gene-LOC110693148	407.77	345.45	320.88	168.77	131.53	136.23	7774	6470	6019	3055	2682	2381	0.432	-1.21	4.05482e-06	0.000102479	down	NW_018744143.1	184194	188242	-	LOC110693148	--	K02895 large subunit ribosomal protein L24 | (RefSeq) 50S ribosomal protein L24, chloroplastic (A)	50S ribosomal protein L24, chloroplastic [Chenopodium quinoa]	RecName: Full=50S ribosomal protein L24, chloroplastic {ECO:0000303|PubMed:10874046}; AltName: Full=CL24; AltName: Full=Chloroplastic large ribosomal subunit protein uL24c {ECO:0000303|PubMed:28007896}; Flags: Precursor;	SubName: Full=50S ribosomal protein L24, chloroplastic {ECO:0000313|RefSeq:XP_008452322.1};	Mitochondrial/chloroplast ribosomal protein L24	GO:0009507,chloroplast; GO:0005840,ribosome; GO:0019843,rRNA binding; GO:0003735,structural constituent of ribosome; GO:0006412,translation	Ribosomal proteins 50S L24/mitochondrial 39S L24
gene-LOC110693157	2.77	0.17	1.02	0.13	0	0	136	8	49	6	0	0	0.033	-4.921	0.000259437	0.00373161	down	NW_018744143.1	522964	529907	+	LOC110693157	--	K08202 MFS transporter, OCT family, solute carrier family 22 (organic cation transporter), member 4/5 | (RefSeq) organic cation/carnitine transporter 4-like (A)	organic cation/carnitine transporter 4-like [Chenopodium quinoa]	RecName: Full=Organic cation/carnitine transporter 4; Short=AtOCT4;	SubName: Full=Uncharacterized protein {ECO:0000313|EMBL:KNA10575.1};	Synaptic vesicle transporter SVOP and related transporters (major facilitator superfamily)	GO:0009535,chloroplast thylakoid membrane; GO:0016021,integral component of membrane; GO:0009705,plant-type vacuole membrane; GO:0005524,ATP binding; GO:0008514,organic anion transmembrane transporter activity; GO:0042631,cellular response to water deprivation	Sugar (and other) transporter
gene-LOC110693182	8.39	5.78	9.88	3.72	2.28	2.44	378	256	438	159	110	101	0.385	-1.377	1.04385e-07	3.78195e-06	down	NW_018744143.1	1057660	1061411	+	LOC110693182	--	K14786 protein KRI1 | (RefSeq) protein kri1-like (A)	protein kri1-like [Chenopodium quinoa]	--	SubName: Full=Uncharacterized protein {ECO:0000313|EMBL:KNA21345.1};	KRR1-interacting protein involved in 40S ribosome biogenesis	--	KRI1-like family C-terminal
gene-LOC110693278	0.2	0.21	0.21	0	0	0	11	11	11	0	0	0	0.018	-5.774	0.000274701	0.0039105	down	NW_018744143.1	2805701	2809462	-	LOC110693278	--	K03097 casein kinase II subunit alpha [EC:2.7.11.1] | (RefSeq) casein kinase II subunit alpha-like isoform X3 (A)	uncharacterized protein LOC110693278 [Chenopodium quinoa]	--	SubName: Full=Uncharacterized protein {ECO:0000313|EMBL:KNA03826.1};	--	--	Protein of unknown function (DUF642)
gene-LOC110693285	1.13	0.09	1.15	0	0	0	13	1	13	0	0	0	0.024	-5.372	0.0064473	0.0440279	down	NW_018744143.1	312318	312893	+	LOC110693285	--	K10775 phenylalanine ammonia-lyase [EC:4.3.1.24] | (RefSeq) phenylalanine ammonia-lyase-like (A)	dirigent protein 1-like [Chenopodium quinoa]	RecName: Full=Dirigent protein 1; Short=AtDIR1; Flags: Precursor;	RecName: Full=Dirigent protein {ECO:0000256|RuleBase:RU363099};	--	GO:0048046,apoplast; GO:0016853,isomerase activity	Dirigent-like protein
gene-LOC110693397	0.76	0.16	3	0	0.1	0.17	15	3	58	0	2	3	0.086	-3.538	0.0066664	0.0451117	down	NW_018744151.1	2170780	2171763	-	LOC110693397	--	K00384 thioredoxin reductase (NADPH) [EC:1.8.1.9] | (RefSeq) thioredoxin reductase 2 (A)	glutathione S-transferase T3-like [Chenopodium quinoa]	RecName: Full=Glutathione S-transferase T3; Short=AtGSTT3; EC=2.5.1.18; AltName: Full=GST class-theta member 3; AltName: Full=Glutathione S-transferase 10C;	SubName: Full=Uncharacterized protein {ECO:0000313|EMBL:KMT02237.1};	--	GO:0005737,cytoplasm; GO:0005634,nucleus; GO:0004364,glutathione transferase activity; GO:0006749,glutathione metabolic process; GO:0009407,toxin catabolic process	No apical meristem-associated C-terminal domain
gene-LOC110693455	49.38	28.21	155.05	35.41	16.64	18.77	752	422	2323	512	271	262	0.359	-1.477	0.00411532	0.0319525	down	NW_018744151.1	356699	357876	+	LOC110693455	--	K11251 histone H2A | (RefSeq) protein H2A.7-like (A)	protein H2A.7-like [Chenopodium quinoa]	RecName: Full=Protein H2A.7; AltName: Full=wcH2A-10; AltName: Full=wcH2A-4;	RecName: Full=Histone H2A {ECO:0000256|RuleBase:RU003767};	Histone 2A	GO:0000786,nucleosome; GO:0005634,nucleus; GO:0003677,DNA binding; GO:0046982,protein heterodimerization activity	C-terminus of histone H2A
gene-LOC110693469	0.21	0.09	0.6	0	0.03	0	7	3	20	0	1	0	0.044	-4.52	0.00758578	0.0497034	down	NW_018744151.1	617739	619430	-	LOC110693469	--	K20291 conserved oligomeric Golgi complex subunit 4 | (RefSeq) pentatricopeptide repeat-containing protein At4g01400, mitochondrial (A)	pentatricopeptide repeat-containing protein At3g13160, mitochondrial-like [Chenopodium quinoa]	RecName: Full=Pentatricopeptide repeat-containing protein At3g13160, mitochondrial; Flags: Precursor;	SubName: Full=Uncharacterized protein {ECO:0000313|EMBL:KNA16260.1};	FOG: PPR repeat	GO:0043231,intracellular membrane-bounded organelle; GO:0016020,membrane; GO:0005739,mitochondrion; GO:0004519,endonuclease activity; GO:0003723,RNA binding; GO:0009451,RNA modification	PPR repeat family
gene-LOC110693531	37.53	27.17	31.78	12.52	11.08	13.55	1985	1412	1654	629	627	657	0.418	-1.259	6.30838e-07	1.95717e-05	down	NW_018744151.1	1682999	1687808	-	LOC110693531	--	K21989 calcium permeable stress-gated cation channel | (RefSeq) CSC1-like protein RXW8 (A)	calmodulin-binding protein 60 B-like [Chenopodium quinoa]	RecName: Full=Calmodulin-binding protein 60 B {ECO:0000303|PubMed:11782485};	SubName: Full=Uncharacterized protein {ECO:0000313|EMBL:KNA13373.1};	--	GO:0005634,nucleus; GO:0005516,calmodulin binding; GO:0003677,DNA binding; GO:0006355,regulation of transcription, DNA-templated; GO:0006950,response to stress; GO:0006351,transcription, DNA-templated	Calmodulin binding protein-like
gene-LOC110693567	5.94	5.88	4.21	0.82	0.4	0.15	221	215	154	29	16	5	0.088	-3.513	6.10045e-10	3.28826e-08	down	NW_018744151.1	2440622	2445194	+	LOC110693567	--	K16297 serine carboxypeptidase-like clade II [EC:3.4.16.-] | (RefSeq) serine carboxypeptidase-like 31 (A)	serine carboxypeptidase-like 31 [Chenopodium quinoa]	RecName: Full=Serine carboxypeptidase-like 31; EC=3.4.16.-; Flags: Precursor;	RecName: Full=Carboxypeptidase {ECO:0000256|RuleBase:RU361156}; EC=3.4.16.- {ECO:0000256|RuleBase:RU361156};	Serine carboxypeptidases (lysosomal cathepsin A)	GO:0005576,extracellular region; GO:0005773,vacuole; GO:0004185,serine-type carboxypeptidase activity; GO:0051603,proteolysis involved in cellular protein catabolic process	Serine carboxypeptidase
gene-LOC110693593	25.87	17.81	32.2	0	0	0	841	569	1030	0	0	0	0	-11.933	5.51179e-23	2.23791e-20	down	NW_018744151.1	2835941	2839656	-	LOC110693593	--	K00384 thioredoxin reductase (NADPH) [EC:1.8.1.9] | (RefSeq) thioredoxin reductase 2-like (A)	uncharacterized protein LOC110693593 [Chenopodium quinoa]	RecName: Full=Glutathione S-transferase T3; Short=AtGSTT3; EC=2.5.1.18; AltName: Full=GST class-theta member 3; AltName: Full=Glutathione S-transferase 10C;	SubName: Full=Uncharacterized protein {ECO:0000313|EMBL:KNA15804.1};	--	GO:0005737,cytoplasm; GO:0005634,nucleus; GO:0004364,glutathione transferase activity; GO:0006749,glutathione metabolic process; GO:0009407,toxin catabolic process	No apical meristem-associated C-terminal domain
gene-LOC110693627	11.73	3.09	55.21	7.05	2.08	0.88	321	83	1486	183	61	22	0.171	-2.548	0.00369275	0.0294427	down	NW_018744151.1	3388315	3390443	+	LOC110693627	--	--	non-classical arabinogalactan protein 30 [Chenopodium quinoa]	RecName: Full=Non-classical arabinogalactan protein 31 {ECO:0000303|PubMed:17885091}; AltName: Full=Hydroxyproline-rich arabinogalactan protein 31 {ECO:0000305}; Flags: Precursor;	SubName: Full=Uncharacterized protein {ECO:0000313|EMBL:KNA24972.1};	--	GO:0005576,extracellular region; GO:0009505,plant-type cell wall; GO:0005886,plasma membrane; GO:0009506,plasmodesma; GO:0009753,response to jasmonic acid	Pollen proteins Ole e I like
gene-LOC110693683	0.28	0.7	0.87	0.17	0	0	12	29	36	7	0	0	0.096	-3.381	0.0074716	0.0490844	down	NW_018744151.1	4418920	4429048	+	LOC110693683	--	--	NAC domain-containing protein 10-like [Chenopodium quinoa]	RecName: Full=NAC domain-containing protein 73 {ECO:0000303|PubMed:15029955}; Short=ANAC073 {ECO:0000303|PubMed:15029955}; AltName: Full=Protein SECONDARY WALL-ASSOCIATED NAC DOMAIN PROTEIN 2 {ECO:0000303|PubMed:18952777};	SubName: Full=Uncharacterized protein {ECO:0000313|EMBL:KNA15093.1};	--	GO:0005634,nucleus; GO:0003700,DNA-binding transcription factor activity; GO:0043565,sequence-specific DNA binding; GO:0044212,transcription regulatory region DNA binding; GO:0045893,positive regulation of transcription, DNA-templated; GO:2000652,regulation of secondary cell wall biogenesis; GO:0006351,transcription, DNA-templated	No apical meristem (NAM) protein
gene-LOC110693714	77.93	58.71	173.74	63.57	31.7	19.87	2062	1526	4523	1597	897	482	0.418	-1.258	0.00482978	0.0357446	down	NW_018744151.1	4925535	4935008	-	LOC110693714	--	K00679 phospholipid:diacylglycerol acyltransferase [EC:2.3.1.158] | (RefSeq) hypothetical protein (A)	GDSL esterase/lipase At5g45950-like isoform X1 [Chenopodium quinoa]	RecName: Full=GDSL esterase/lipase At5g45950; EC=3.1.1.-; AltName: Full=Extracellular lipase At5g45950; Flags: Precursor;	SubName: Full=Uncharacterized protein {ECO:0000313|EMBL:CCB55647.1};	--	GO:0005576,extracellular region; GO:0016788,hydrolase activity, acting on ester bonds; GO:0016042,lipid catabolic process	GDSL-like Lipase/Acylhydrolase
gene-LOC110693844	48.65	24.44	81.64	31.97	7.57	7.48	1327	655	2191	828	221	187	0.334	-1.584	0.00541677	0.0387547	down	NW_018744167.1	1722432	1726126	+	LOC110693844	--	K14563 rRNA 2'-O-methyltransferase fibrillarin [EC:2.1.1.-] | (RefSeq) mediator of RNA polymerase II transcription subunit 36a-like (A)	mediator of RNA polymerase II transcription subunit 36a-like [Chenopodium quinoa]	RecName: Full=Mediator of RNA polymerase II transcription subunit 36a; AltName: Full=Fibrillarin-like protein 2; AltName: Full=Histone-glutamine methyltransferase; AltName: Full=rRNA 2'-O-methyltransferase fibrillarin 2; EC=2.1.1.-;	SubName: Full=Uncharacterized protein {ECO:0000313|EMBL:KNA24281.1};	Fibrillarin and related nucleolar RNA-binding proteins	GO:0031428,box C/D snoRNP complex; GO:0015030,Cajal body; GO:0016592,mediator complex; GO:0005730,nucleolus; GO:0032040,small-subunit processome; GO:1990259,histone-glutamine methyltransferase activity; GO:0004540,ribonuclease activity; GO:0003723,RNA binding; GO:0008649,rRNA methyltransferase activity; GO:0030515,snoRNA binding; GO:0000494,box C/D snoRNA 3'-end processing; GO:1990258,histone glu…	Fibrillarin
gene-LOC110693848	2.77	1.79	3.17	1.01	0.38	1.1	55	35	62	19	8	20	0.351	-1.511	0.00408363	0.0317659	down	NW_018744167.1	1804847	1806478	-	LOC110693848	--	--	--	--	--	--	--	--
gene-LOC110693855	3.01	1.38	6.72	1.19	0.93	1.14	178	80	391	67	59	62	0.348	-1.522	0.00145165	0.0147431	down	NW_018742345.1	202125	207839	-	LOC110693855	--	K17964 leucine-rich PPR motif-containing protein, mitochondrial | (RefSeq) hypothetical protein (A)	pentatricopeptide repeat-containing protein At3g49240-like [Chenopodium quinoa]	RecName: Full=Pentatricopeptide repeat-containing protein At3g49240, mitochondrial; AltName: Full=Protein EMBRYO DEFECTIVE 1796; Flags: Precursor;	SubName: Full=Uncharacterized protein {ECO:0000313|EMBL:KNA19069.1};	FOG: PPR repeat	GO:0009507,chloroplast; GO:0005739,mitochondrion; GO:0005524,ATP binding; GO:0004519,endonuclease activity; GO:0003723,RNA binding; GO:0009793,embryo development ending in seed dormancy; GO:0009960,endosperm development; GO:0006349,regulation of gene expression by genetic imprinting; GO:0009451,RNA modification	PPR repeat family
gene-LOC110693896	2.78	0.79	4.52	0.73	0.34	0.16	129	36	206	32	17	7	0.174	-2.522	0.000171857	0.0026549	down	NW_018744167.1	2272246	2274564	+	LOC110693896	--	K21370 baicalein 7-O-glucuronosyltransferase [EC:2.4.1.253] | (RefSeq) baicalein 7-O-glucuronosyltransferase-like (A)	UDP-glycosyltransferase 88B1-like [Chenopodium quinoa]	RecName: Full=UDP-glycosyltransferase 88B1 {ECO:0000303|PubMed:15610349}; EC=2.4.1.- {ECO:0000305};	RecName: Full=Glycosyltransferase {ECO:0000256|RuleBase:RU362057}; EC=2.4.1.- {ECO:0000256|RuleBase:RU362057};	UDP-glucuronosyl and UDP-glucosyl transferase	GO:0016758,transferase activity, transferring hexosyl groups; GO:0008152,metabolic process	UDP-glucoronosyl and UDP-glucosyl transferase
gene-LOC110693910	19.71	11.15	46.83	11.5	6.4	6.87	930	517	2174	515	323	297	0.371	-1.432	0.000788305	0.00914199	down	NW_018744167.1	2491157	2498955	+	LOC110693910	--	K00873 pyruvate kinase [EC:2.7.1.40] | (RefSeq) pyruvate kinase isozyme G, chloroplastic-like (A)	pyruvate kinase isozyme G, chloroplastic-like [Chenopodium quinoa]	RecName: Full=Plastidial pyruvate kinase 2; Short=PKp2; EC=2.7.1.40; AltName: Full=Plastidial pyruvate kinase 1; Short=PKP1; AltName: Full=Pyruvate kinase III; AltName: Full=Pyruvate kinase isozyme B1, chloroplastic; Short=PKP-BETA1; Short=Plastidic pyruvate kinase beta subunit 1; Flags: Precursor;	RecName: Full=Pyruvate kinase {ECO:0000256|RuleBase:RU000504}; EC=2.7.1.40 {ECO:0000256|RuleBase:RU000504};	Pyruvate kinase	GO:0009507,chloroplast; GO:0009570,chloroplast stroma; GO:0005739,mitochondrion; GO:0005524,ATP binding; GO:0016301,kinase activity; GO:0000287,magnesium ion binding; GO:0030955,potassium ion binding; GO:0004743,pyruvate kinase activity; GO:0006633,fatty acid biosynthetic process; GO:0006629,lipid metabolic process; GO:0046686,response to cadmium ion; GO:0048316,seed development; GO:0010431,seed …	Pyruvate kinase, barrel domain
gene-LOC110693918	19.73	21.49	16.9	8.4	5.65	6.04	356	381	300	144	109	100	0.363	-1.46	8.38923e-06	0.000195082	down	NW_018744167.1	2553812	2555721	-	LOC110693918	--	--	uncharacterized protein LOC110693918 [Chenopodium quinoa]	--	SubName: Full=Uncharacterized protein {ECO:0000313|EMBL:KNA05785.1};	--	--	Protein of unknown function (DUF3143)
gene-LOC110693959	4.83	2.53	1.74	0	0	0	62	32	22	0	0	0	0.005	-7.621	8.59582e-08	3.16343e-06	down	NW_018742345.1	664503	665228	-	LOC110693959	--	--	--	--	--	--	--	--
gene-LOC110694022	1.33	1.5	1.61	0.58	0.58	0.36	120	133	143	50	56	30	0.373	-1.422	4.0903e-05	0.000788385	down	NW_018744187.1	1369635	1374809	+	LOC110694022	--	--	uncharacterized protein LOC110694022 [Chenopodium quinoa]	--	SubName: Full=Uncharacterized protein {ECO:0000313|EMBL:KNA23100.1}; Flags: Fragment;	--	--	Plant transposase (Ptta/En/Spm family)
gene-LOC110694119	12.94	22.07	5.03	0.07	0.12	0.22	392	657	150	2	4	6	0.01	-6.603	2.78496e-17	5.20147e-15	down	NW_018744239.1	2071675	2075454	-	LOC110694119	--	K01381 saccharopepsin [EC:3.4.23.25] | (RefSeq) aspartic proteinase CDR1-like (A)	aspartic proteinase CDR1-like [Chenopodium quinoa]	RecName: Full=Aspartic proteinase CDR1; EC=3.4.23.-; AltName: Full=Protein CONSTITUTIVE DISEASE RESISTANCE 1; Flags: Precursor;	SubName: Full=Uncharacterized protein {ECO:0000313|EMBL:KNA06676.1};	Aspartyl protease	GO:0048046,apoplast; GO:0004190,aspartic-type endopeptidase activity; GO:0042742,defense response to bacterium; GO:0030163,protein catabolic process; GO:0010310,regulation of hydrogen peroxide metabolic process; GO:0010337,regulation of salicylic acid metabolic process	Xylanase inhibitor N-terminal
gene-LOC110694166	1	0.56	2.09	0.41	0.05	0.12	18	10	37	7	1	2	0.177	-2.494	0.00720705	0.0477664	down	NW_018742204.1	16372243	16375383	-	LOC110694166	--	K08360 cytochrome b-561 [EC:7.2.1.3] | (RefSeq) probable transmembrane ascorbate ferrireductase 4 (A)	probable transmembrane ascorbate ferrireductase 4 [Chenopodium quinoa]	RecName: Full=Probable transmembrane ascorbate ferrireductase 4; EC=1.16.5.1; AltName: Full=Artb561-4; AltName: Full=Cytochrome b-561D; AltName: Full=Protein b561A.tha6;	SubName: Full=Uncharacterized protein {ECO:0000313|EMBL:AFK40290.1};	Cytochrome b	GO:0016021,integral component of membrane; GO:0046872,metal ion binding; GO:0016491,oxidoreductase activity; GO:0055114,oxidation-reduction process	Eukaryotic cytochrome b561
gene-LOC110694185	42.39	37.46	45.18	20.47	18.27	14.48	1169	1015	1226	536	539	366	0.462	-1.114	2.74548e-07	9.20597e-06	down	NW_018744239.1	3251245	3255959	-	LOC110694185	--	K19042 E3 ubiquitin-protein ligase BOI and related proteins [EC:2.3.2.27] | (RefSeq) LOW QUALITY PROTEIN: E3 ubiquitin-protein ligase BOI-like (A)	LOW QUALITY PROTEIN: E3 ubiquitin-protein ligase BOI-like [Chenopodium quinoa]	RecName: Full=Probable BOI-related E3 ubiquitin-protein ligase 2; EC=2.3.2.27 {ECO:0000250|UniProtKB:Q9FHE4}; AltName: Full=RING-type E3 ubiquitin transferase BRG2 {ECO:0000305};	SubName: Full=Uncharacterized protein {ECO:0000313|EMBL:KNA13187.1}; Flags: Fragment;	Predicted E3 ubiquitin ligase	GO:0046872,metal ion binding; GO:0016740,transferase activity; GO:0006952,defense response; GO:0043161,proteasome-mediated ubiquitin-dependent protein catabolic process; GO:0043067,regulation of programmed cell death	Zinc finger, C3HC4 type (RING finger)
gene-LOC110694186	9.86	9.14	15.24	5.51	5.63	3.89	213	194	324	113	130	77	0.49	-1.029	0.000144757	0.00228733	down	NW_018744239.1	3255999	3257431	-	LOC110694186	--	--	--	--	--	--	--	--
gene-LOC110694406	0.73	1.48	1.91	0.19	0	0	12	24	31	3	0	0	0.049	-4.362	0.000349941	0.00477062	down	NW_018742204.1	17421447	17422271	+	LOC110694406	--	K19027 zinc finger FYVE domain-containing protein 26 | (RefSeq) hypothetical protein (A)	disease resistance response protein 206-like [Chenopodium quinoa]	RecName: Full=Disease resistance response protein 206; AltName: Full=Dirigent protein PI206; Flags: Precursor;	RecName: Full=Dirigent protein {ECO:0000256|RuleBase:RU363099};	--	GO:0048046,apoplast; GO:0016853,isomerase activity; GO:0006952,defense response; GO:0009607,response to biotic stimulus	Dirigent-like protein
gene-LOC110694425	4.36	4.44	2.92	0.25	0.04	0.17	111	111	73	6	1	4	0.04	-4.661	9.19371e-12	6.89602e-10	down	NW_018744239.1	7297471	7303001	-	LOC110694425	--	K12486 stromal membrane-associated protein | (RefSeq) probable ADP-ribosylation factor GTPase-activating protein AGD11 (A)	protein C2-DOMAIN ABA-RELATED 7-like [Chenopodium quinoa]	RecName: Full=Protein C2-DOMAIN ABA-RELATED 7 {ECO:0000303|PubMed:25465408};	SubName: Full=Uncharacterized protein {ECO:0000313|EMBL:KNA20518.1};	Predicted Ca2+-dependent phospholipid-binding protein	GO:0005634,nucleus; GO:0005886,plasma membrane; GO:0005096,GTPase activator activity; GO:0046872,metal ion binding; GO:0005543,phospholipid binding; GO:0009738,abscisic acid-activated signaling pathway; GO:0009789,positive regulation of abscisic acid-activated signaling pathway; GO:0043547,positive regulation of GTPase activity	C2 domain
gene-LOC110694460	4.05	2.83	3.92	1.59	1.7	1.5	147	101	140	55	66	50	0.489	-1.033	0.000758393	0.00884209	down	NW_018744239.1	8899289	8903757	-	LOC110694460	--	--	--	--	--	--	--	--
gene-LOC110694510	18.27	12.69	32.78	11.73	6.24	6.18	761	519	1343	464	278	236	0.426	-1.232	0.000255659	0.00369292	down	NW_018742345.1	5285586	5287669	+	LOC110694510	--	K09496 T-complex protein 1 subunit delta | (RefSeq) T-complex protein 1 subunit delta (A)	T-complex protein 1 subunit delta [Chenopodium quinoa]	RecName: Full=T-complex protein 1 subunit delta {ECO:0000303|PubMed:11599560}; Short=TCP-1-delta {ECO:0000303|PubMed:11599560}; AltName: Full=CCT-delta {ECO:0000303|PubMed:11599560}; AltName: Full=Chaperonin CCT4 {ECO:0000305};	RecName: Full=T-complex protein 1 subunit delta {ECO:0000256|RuleBase:RU004192};	Chaperonin complex component, TCP-1 delta subunit (CCT4)	GO:0005832,chaperonin-containing T-complex; GO:0005829,cytosol; GO:0005524,ATP binding; GO:0044183,protein binding involved in protein folding; GO:0051082,unfolded protein binding; GO:0006458,'de novo' protein folding; GO:0061077,chaperone-mediated protein folding; GO:0046686,response to cadmium ion	TCP-1/cpn60 chaperonin family
gene-LOC110694536	8.96	48	0.32	0	0	0	115	605	4	0	0	0	0.001	-10.439	0.000150411	0.00236566	down	NW_018744239.1	2691088	2692042	-	LOC110694536	--	--	uncharacterized protein LOC110694148 [Chenopodium quinoa]	RecName: Full=60 kDa jasmonate-induced protein; EC=3.2.2.22; AltName: Full=rRNA N-glycosidase;	SubName: Full=Uncharacterized protein {ECO:0000313|EMBL:KMT11885.1};	--	GO:0030598,rRNA N-glycosylase activity; GO:0090729,toxin activity; GO:0006952,defense response; GO:0017148,negative regulation of translation	--
gene-LOC110694588	0.42	0.26	1.06	0	0	0.06	8	5	20	0	0	1	0.039	-4.69	0.00336143	0.027572	down	NW_018744239.1	1330473	1331435	+	LOC110694588	--	K14085 aldehyde dehydrogenase family 7 member A1 [EC:1.2.1.31 1.2.1.8 1.2.1.3] | (RefSeq) aldehyde dehydrogenase family 2 member C4-like (A)	uncharacterized protein LOC110694588 [Chenopodium quinoa]	--	SubName: Full=Uncharacterized protein {ECO:0000313|EnsemblPlants:Bo9g169240.1};	--	GO:0016788,hydrolase activity, acting on ester bonds	Plant transposon protein
gene-LOC110694641	1.34	1.83	1.87	0.74	0.23	0.12	38	51	52	20	7	3	0.225	-2.152	0.00168074	0.0164784	down	NW_018744240.1	225057	226473	-	LOC110694641	--	--	uncharacterized protein LOC110694641 [Chenopodium quinoa]	--	SubName: Full=Uncharacterized protein {ECO:0000313|EMBL:KNA18375.1};	--	GO:0016021,integral component of membrane	--
gene-LOC110694645	2.37	1.3	3.6	1	0.99	0.65	87	47	130	35	39	22	0.416	-1.265	0.0028479	0.0244384	down	NW_018744240.1	258704	262592	-	LOC110694645	--	--	protein LAZY 1-like isoform X1 [Chenopodium quinoa]	RecName: Full=Protein LAZY 1 {ECO:0000305}; Short=AtLA1 {ECO:0000303|PubMed:25028496}; Short=AtLAZY1 {ECO:0000303|PubMed:23331961};	SubName: Full=Uncharacterized protein {ECO:0000313|EMBL:KNA25959.1};	--	GO:0016021,integral component of membrane; GO:0005634,nucleus; GO:0005886,plasma membrane; GO:0009959,negative gravitropism; GO:0009958,positive gravitropism; GO:0040008,regulation of growth	--
gene-LOC110694656	1.53	0.84	2.76	0.25	0	0	13	7	23	2	0	0	0.053	-4.238	0.00274264	0.0237534	down	NW_018744240.1	306938	307810	-	LOC110694656	--	--	--	--	--	--	--	--
gene-LOC110694687	1.49	0.37	6.96	0.83	0.34	0.26	74	18	339	39	18	12	0.199	-2.333	0.00625897	0.0430012	down	NW_018744240.1	609359	613095	-	LOC110694687	--	K21777 G2/mitotic-specific cyclin-B, other | (RefSeq) G2/mitotic-specific cyclin-2-like (A)	G2/mitotic-specific cyclin-2-like [Chenopodium quinoa]	RecName: Full=G2/mitotic-specific cyclin-1; AltName: Full=B-like cyclin; AltName: Full=CycMs1;	SubName: Full=Uncharacterized protein {ECO:0000313|EMBL:KNA12800.1};	Cyclin B and related kinase-activating proteins	GO:0005634,nucleus; GO:0007049,cell cycle; GO:0051301,cell division	Cyclin, N-terminal domain
gene-LOC110694695	2.9	1.13	8.86	1.65	0.76	0.52	128	49	384	69	36	21	0.269	-1.894	0.00434544	0.0331061	down	NW_018744240.1	785629	788555	-	LOC110694695	--	--	uncharacterized protein LOC110694695 [Chenopodium quinoa]	--	SubName: Full=Uncharacterized protein {ECO:0000313|EMBL:KNA10535.1};	--	--	--
gene-LOC110694727	1.73	0.58	7.69	0.74	0.19	0.25	76	25	332	31	9	10	0.142	-2.814	0.000728994	0.00859559	down	NW_018744240.1	1176224	1179132	+	LOC110694727	--	K14152 phosphoribosyl-ATP pyrophosphohydrolase / phosphoribosyl-AMP cyclohydrolase / histidinol dehydrogenase [EC:3.6.1.31 3.5.4.19 1.1.1.23] | (RefSeq) uncharacterized protein LOC111783531 (A)	protein POLLENLESS 3-LIKE 2-like [Chenopodium quinoa]	RecName: Full=Protein POLLENLESS 3-LIKE 2 {ECO:0000303|Ref.5};	SubName: Full=Uncharacterized protein {ECO:0000313|EMBL:KNA18667.1};	--	GO:0005634,nucleus; GO:0007049,cell cycle; GO:0051301,cell division	Tetratricopeptide repeat
gene-LOC110694775	6.31	3.64	6.86	0	0	0	173	98	185	0	0	0	0.001	-9.515	1.90722e-14	2.29814e-12	down	NW_018744240.1	711298	713049	-	LOC110694775	--	K15078 structure-specific endonuclease subunit SLX1 [EC:3.6.1.-] | (RefSeq) putative disease resistance protein RGA1 (A)	disease resistance protein RGA2-like [Chenopodium quinoa]	RecName: Full=Putative disease resistance protein RGA4; AltName: Full=RGA4-blb;	SubName: Full=Uncharacterized protein {ECO:0000313|EMBL:KNA19706.1};	Apoptotic ATPase	GO:0043531,ADP binding; GO:0005524,ATP binding; GO:0006952,defense response	NB-ARC domain
gene-LOC110694821	0.65	0.59	1.1	0	0	0	27	24	45	0	0	0	0.007	-7.256	7.11327e-08	2.65179e-06	down	NW_018744249.1	93704	97984	-	LOC110694821	--	--	--	--	--	--	--	--
gene-LOC110694873	2	1.26	2.77	0	0	0	47	29	64	0	0	0	0.005	-7.794	2.73263e-09	1.3205e-07	down	NW_018744268.1	1773953	1776559	+	LOC110694873	--	--	--	--	--	--	--	--
gene-LOC110694894	2.13	0.4	8.66	0.89	0.51	0.27	156	29	625	62	40	18	0.183	-2.449	0.00305523	0.0257793	down	NW_018744268.1	4343383	4349088	+	LOC110694894	--	K11498 centromeric protein E | (RefSeq) kinesin-like protein NACK1 (A)	kinesin-like protein NACK1 [Chenopodium quinoa]	RecName: Full=Kinesin-like protein NACK1; AltName: Full=NPK1-activating kinesin-1;	RecName: Full=Kinesin-like protein {ECO:0000256|RuleBase:RU000394};	Kinesin-like protein	GO:0005874,microtubule; GO:0005634,nucleus; GO:0009524,phragmoplast; GO:0005524,ATP binding; GO:0008017,microtubule binding; GO:0003777,microtubule motor activity; GO:0000919,cell plate assembly; GO:0007018,microtubule-based movement	Kinesin motor domain
gene-LOC110694965	24.1	20.4	37.3	18.06	9.83	8.92	392	326	597	279	171	133	0.495	-1.016	0.000792559	0.00918277	down	NW_018744284.1	1600860	1606493	+	LOC110694965	--	K11087 small nuclear ribonucleoprotein D1 | (RefSeq) small nuclear ribonucleoprotein SmD1a (A)	small nuclear ribonucleoprotein SmD1a [Chenopodium quinoa]	RecName: Full=Small nuclear ribonucleoprotein SmD1a {ECO:0000303|PubMed:15575968}; Short=AtSmD1-a {ECO:0000303|PubMed:15575968};	SubName: Full=Uncharacterized protein {ECO:0000313|EMBL:KNA25193.1};	Small nuclear ribonucleoprotein SMD1 and related snRNPs	GO:0071013,catalytic step 2 spliceosome; GO:0000243,commitment complex; GO:0005829,cytosol; GO:0016607,nuclear speck; GO:0005730,nucleolus; GO:0005634,nucleus; GO:0034715,pICln-Sm protein complex; GO:0071011,precatalytic spliceosome; GO:0071010,prespliceosome; GO:0034719,SMN-Sm protein complex; GO:0097526,spliceosomal tri-snRNP complex; GO:0005685,U1 snRNP; GO:0005689,U12-type spliceosomal comple…	LSM domain
gene-LOC110694997	1.46	0.54	5.02	0.65	0.03	0.1	50	18	169	21	1	3	0.125	-2.998	0.00363361	0.0291161	down	NW_018744284.1	2967747	2970063	-	LOC110694997	--	--	uncharacterized protein LOC110694997 [Chenopodium quinoa]	--	SubName: Full=Uncharacterized protein {ECO:0000313|EMBL:KNA21455.1};	--	--	--
gene-LOC110694998	1.39	1.13	2.4	0.24	0.17	0.5	30	24	51	5	4	10	0.211	-2.246	0.000554883	0.00687922	down	NW_018744284.1	2963689	2967661	+	LOC110694998	--	--	uncharacterized protein LOC110694998 isoform X1 [Chenopodium quinoa]	--	SubName: Full=Uncharacterized protein {ECO:0000313|EMBL:KNA21456.1};	--	--	--
gene-LOC110695045	85.6	62.67	85.23	42.54	21.97	23.2	2696	1939	2641	1272	740	670	0.402	-1.313	3.44435e-06	8.86701e-05	down	NW_018744290.1	103670	107528	+	LOC110695045	--	K11279 nucleosome assembly protein 1-like 1 | (RefSeq) nucleosome assembly protein 1;3-like (A)	nucleosome assembly protein 1;3-like [Chenopodium quinoa]	RecName: Full=Nucleosome assembly protein 1;3; Short=NtNAP1;3; AltName: Full=Nucleosome assembly protein 1-like 3; Short=NtNAP1_L3; Flags: Precursor;	SubName: Full=Uncharacterized protein {ECO:0000313|EMBL:KNA18167.1};	Nucleosome assembly protein NAP-1	GO:0005737,cytoplasm; GO:0005634,nucleus; GO:0006334,nucleosome assembly	Nucleosome assembly protein (NAP)
gene-LOC110695210	12.39	4.75	32.48	3.57	2.92	3.26	377	142	972	103	95	91	0.237	-2.077	9.05856e-05	0.00155217	down	NW_018744290.1	1880291	1884178	+	LOC110695210	--	K00083 cinnamyl-alcohol dehydrogenase [EC:1.1.1.195] | (RefSeq) probable mannitol dehydrogenase (A)	probable mannitol dehydrogenase [Chenopodium quinoa]	RecName: Full=Probable mannitol dehydrogenase; EC=1.1.1.255; AltName: Full=NAD-dependent mannitol dehydrogenase;	SubName: Full=Uncharacterized protein {ECO:0000313|EMBL:CBI37637.3};	Alcohol dehydrogenase, class V	GO:0046029,mannitol dehydrogenase activity; GO:0008270,zinc ion binding	Alcohol dehydrogenase GroES-like domain
gene-LOC110695217	370.33	286.84	429.01	277.5	115.79	101.63	10879	8278	12400	7740	3638	2737	0.486	-1.041	0.00445611	0.0336882	down	NW_018744290.1	1932386	1935502	-	LOC110695217	--	K02925 large subunit ribosomal protein L3e | (RefSeq) 60S ribosomal protein L3-like (A)	60S ribosomal protein L3-like [Chenopodium quinoa]	RecName: Full=60S ribosomal protein L3;	SubName: Full=Uncharacterized protein {ECO:0000313|EMBL:KCW71110.1};	60S ribosomal protein L3 and related proteins	GO:0022625,cytosolic large ribosomal subunit; GO:0003723,RNA binding; GO:0003735,structural constituent of ribosome; GO:0000027,ribosomal large subunit assembly; GO:0006412,translation	Ribosomal protein L3
gene-LOC110695493	4.72	3.41	6.52	1.74	2.25	2.28	120	85	163	42	61	53	0.484	-1.048	0.00181484	0.0174722	down	NW_018744301.1	732950	741186	-	LOC110695493	--	K02258 cytochrome c oxidase assembly protein subunit 11 | (RefSeq) cytochrome c oxidase assembly protein COX11, mitochondrial-like isoform X1 (A)	cytochrome c oxidase assembly protein COX11, mitochondrial-like isoform X1 [Chenopodium quinoa]	RecName: Full=Cytochrome c oxidase assembly protein COX11, mitochondrial; Flags: Precursor;	SubName: Full=Uncharacterized protein {ECO:0000313|EMBL:KNA26021.1};	Cytochrome oxidase assembly factor COX11	GO:0032592,integral component of mitochondrial membrane; GO:0005743,mitochondrial inner membrane; GO:0005739,mitochondrion; GO:0005507,copper ion binding; GO:0043621,protein self-association; GO:0009846,pollen germination; GO:1904960,positive regulation of cytochrome-c oxidase activity; GO:0010101,post-embryonic root morphogenesis	Cytochrome c oxidase assembly protein CtaG/Cox11
gene-LOC110695505	3.25	4.02	4.37	0	0	0.1	37	45	49	0	0	1	0.009	-6.791	1.77869e-07	6.18632e-06	down	NW_018744301.1	1816065	1817019	+	LOC110695505	--	--	--	--	--	--	--	--
gene-LOC110695528	1.44	1.72	1.7	0	0.06	0.04	87	102	101	0	4	2	0.023	-5.463	2.20807e-13	2.16484e-11	down	NW_018744301.1	4148847	4155312	-	LOC110695528	--	--	uncharacterized protein LOC110695528 isoform X1 [Chenopodium quinoa]	--	SubName: Full=Uncharacterized protein {ECO:0000313|EMBL:KMS85024.1}; Flags: Fragment;	--	--	Plant transposase (Ptta/En/Spm family)
gene-LOC110695531	0.44	0.49	1.62	0	0	0	11	12	40	0	0	0	0.01	-6.58	1.54249e-05	0.00033577	down	NW_018744301.1	4360665	4365376	+	LOC110695531	--	--	--	--	--	--	--	--
gene-LOC110695533	1.21	0.76	3.51	0.45	0.09	0.1	65	40	186	23	5	5	0.132	-2.917	8.19364e-05	0.00142603	down	NW_018744301.1	4684123	4690581	+	LOC110695533	--	--	putative B3 domain-containing protein At5g66980 [Chenopodium quinoa]	RecName: Full=Putative B3 domain-containing protein At5g66980;	SubName: Full=Uncharacterized protein {ECO:0000313|EMBL:OWM74464.1};	--	GO:0005634,nucleus; GO:0003677,DNA binding; GO:0006355,regulation of transcription, DNA-templated; GO:0006351,transcription, DNA-templated	B3 DNA binding domain
gene-LOC110695539	0.44	0.53	0.61	0.17	0.11	0.23	27	32	37	10	7	13	0.349	-1.52	0.00702785	0.0468532	down	NW_018742356.1	153274	158709	-	LOC110695539	--	K14300 nuclear pore complex protein Nup133 | (RefSeq) nuclear pore complex protein NUP133 (A)	uncharacterized protein LOC110695539 [Chenopodium quinoa]	--	SubName: Full=uncharacterized protein LOC101515037 {ECO:0000313|RefSeq:XP_004506385.1};	--	--	Domain of unknown function (DUF4218)
gene-LOC110695563	9.92	10.61	13.66	5.6	2.96	3.29	138	145	187	74	44	42	0.374	-1.418	1.07327e-05	0.000242827	down	NW_018744301.1	8142176	8145813	-	LOC110695563	--	--	--	--	--	--	--	--
gene-LOC110695582	0.67	0.88	0.78	0	0	0	34	44	39	0	0	0	0.005	-7.609	1.17952e-08	5.09362e-07	down	NW_018744301.1	1818047	1820870	+	LOC110695582	--	K12524 bifunctional aspartokinase / homoserine dehydrogenase 1 [EC:2.7.2.4 1.1.1.3] | (RefSeq) bifunctional aspartokinase/homoserine dehydrogenase 2, chloroplastic-like (A)	zinc finger MYM-type protein 1-like [Chenopodium quinoa]	--	SubName: Full=OSJNBb0016D16.6 protein {ECO:0000313|EMBL:CAE04315.1};	--	GO:0005737,cytoplasm; GO:0005654,nucleoplasm; GO:0003677,DNA binding; GO:0046983,protein dimerization activity; GO:0000981,DNA-binding transcription factor activity, RNA polymerase II-specific	Domain of unknown function (DUF4371)
gene-LOC110695627	1.47	1.2	1.8	0.35	0.07	0.4	40	32	48	9	2	10	0.198	-2.34	0.000356617	0.00483939	down	NW_018744304.1	2114936	2119329	-	LOC110695627	--	K07893 Ras-related protein Rab-6A | (RefSeq) ras-related protein RABH1e-like isoform X1 (A)	ras-related protein RABH1e-like isoform X1 [Chenopodium quinoa]	RecName: Full=Ras-related protein RABH1e; Short=AtRABH1e;	SubName: Full=Ras-related protein RABH1e {ECO:0000313|EMBL:OAY78225.1};	GTPase Rab6/YPT6/Ryh1, small G protein superfamily	GO:0005829,cytosol; GO:0005794,Golgi apparatus; GO:0000139,Golgi membrane; GO:0005525,GTP binding; GO:0003924,GTPase activity; GO:0006891,intra-Golgi vesicle-mediated transport; GO:0015031,protein transport; GO:0042147,retrograde transport, endosome to Golgi; GO:0006890,retrograde vesicle-mediated transport, Golgi to ER	Ras family
gene-LOC110695643	1.65	1.29	2.43	0	0	0	65	50	94	0	0	0	0.003	-8.382	3.7362e-11	2.55141e-09	down	NW_018744304.1	2967453	2970294	+	LOC110695643	--	K22071 ferredoxin-2, mitochondrial | (RefSeq) adrenodoxin-like protein 2, mitochondrial (A)	uncharacterized protein LOC110695643 [Chenopodium quinoa]	--	SubName: Full=Uncharacterized protein {ECO:0000313|EMBL:KNA07031.1}; Flags: Fragment;	FOG: Transposon-encoded proteins with TYA, reverse transcriptase, integrase domains in various combinations	--	Retrotransposon gag protein
gene-LOC110695644	4.78	3.64	3.77	0.71	0.96	0.88	107	80	83	15	23	18	0.227	-2.138	7.53445e-07	2.28629e-05	down	NW_018744304.1	2974587	2977251	+	LOC110695644	--	--	--	--	--	--	--	--
gene-LOC110695645	5.14	3.21	10.42	3.15	2.1	1.76	220	135	439	128	96	69	0.428	-1.225	0.0018021	0.017391	down	NW_018744304.1	3053722	3064431	-	LOC110695645	--	K17710 pentatricopeptide repeat domain-containing protein 1 | (RefSeq) putative pentatricopeptide repeat-containing protein At2g02150 (A)	pentatricopeptide repeat-containing protein At4g35850, mitochondrial-like isoform X1 [Chenopodium quinoa]	RecName: Full=Pentatricopeptide repeat-containing protein At4g35850, mitochondrial; Flags: Precursor;	SubName: Full=Uncharacterized protein {ECO:0000313|EMBL:KNA10515.1};	FOG: PPR repeat	GO:0043231,intracellular membrane-bounded organelle; GO:0005739,mitochondrion; GO:0004519,endonuclease activity; GO:0003723,RNA binding; GO:0009451,RNA modification	PPR repeat family
gene-LOC110695670	3.03	2.48	3.86	2.27	1.19	0.85	418	336	524	297	175	107	0.495	-1.014	0.00427481	0.0327283	down	NW_018744304.1	4806426	4817007	+	LOC110695670	--	--	uncharacterized protein LOC110695670 isoform X1 [Chenopodium quinoa]	--	SubName: Full=Uncharacterized protein {ECO:0000313|EMBL:KNA08412.1}; Flags: Fragment;	--	--	Plant transposase (Ptta/En/Spm family)
gene-LOC110695673	193.35	147.35	204.32	126.07	65.89	54.9	3350	2508	3483	2074	1221	872	0.485	-1.045	0.000863551	0.00984349	down	NW_018744304.1	4968447	4971151	-	LOC110695673	--	K02953 small subunit ribosomal protein S13e | (RefSeq) 40S ribosomal protein S13-like (A)	40S ribosomal protein S13-like [Chenopodium quinoa]	RecName: Full=40S ribosomal protein S13;	SubName: Full=Uncharacterized protein {ECO:0000313|EMBL:KZM88015.1};	40S ribosomal protein S13	GO:0022627,cytosolic small ribosomal subunit; GO:0005730,nucleolus; GO:0070181,small ribosomal subunit rRNA binding; GO:0003735,structural constituent of ribosome; GO:0006412,translation	Ribosomal S13/S15 N-terminal domain
gene-LOC110695708	0.24	0.16	1.4	0.04	0	0.04	6	4	34	1	0	1	0.057	-4.131	0.00644247	0.044003	down	NW_018744304.1	5449693	5451634	+	LOC110695708	--	K09841 xanthoxin dehydrogenase [EC:1.1.1.288] | (RefSeq) zerumbone synthase-like (A)	secoisolariciresinol dehydrogenase-like [Chenopodium quinoa]	RecName: Full=Secoisolariciresinol dehydrogenase; EC=1.1.1.331; Flags: Fragment;	SubName: Full=Uncharacterized protein {ECO:0000313|EMBL:KNA11984.1};	Reductases with broad range of substrate specificities	GO:0000166,nucleotide binding; GO:0016491,oxidoreductase activity	Enoyl-(Acyl carrier protein) reductase
gene-LOC110695712	83.67	65.1	99.04	56.05	19.01	19	1239	947	1443	788	301	258	0.403	-1.311	0.00149765	0.0151075	down	NW_018744304.1	5488460	5489200	+	LOC110695712	--	K02962 small subunit ribosomal protein S17e | (RefSeq) 40S ribosomal protein S17-like (A)	40S ribosomal protein S17-like [Chenopodium quinoa]	RecName: Full=40S ribosomal protein S17;	SubName: Full=Uncharacterized protein {ECO:0000313|EMBL:KNA19745.1};	40S ribosomal protein S17	GO:0022627,cytosolic small ribosomal subunit; GO:0003735,structural constituent of ribosome; GO:0000028,ribosomal small subunit assembly; GO:0006412,translation	Ribosomal S17
gene-LOC110695739	11.48	8.94	11.94	6.35	3.91	3	217	166	222	114	79	52	0.441	-1.18	0.000288713	0.0040746	down	NW_018744304.1	5983831	5987212	-	LOC110695739	--	K02933 large subunit ribosomal protein L6 | (RefSeq) uncharacterized protein LOC110695739 (A)	uncharacterized protein LOC110695739 [Chenopodium quinoa]	RecName: Full=60S ribosomal protein L6, mitochondrial;	SubName: Full=Uncharacterized protein {ECO:0000313|EMBL:KNA04161.1};	Mitochondrial/chloroplast ribosomal protein L6	GO:0005739,mitochondrion; GO:0005840,ribosome; GO:0019843,rRNA binding; GO:0003735,structural constituent of ribosome; GO:0006412,translation	Ribosomal protein L6
gene-LOC110695748	3.98	4.32	1.81	0.24	0.06	0.56	123	131	55	7	2	16	0.087	-3.52	6.66266e-06	0.000158723	down	NW_018744304.1	6149168	6159609	-	LOC110695748	--	K02952 small subunit ribosomal protein S13 | (RefSeq) 30S ribosomal protein S13, chloroplastic-like (A)	uncharacterized protein LOC110695748 [Chenopodium quinoa]	--	SubName: Full=Uncharacterized protein {ECO:0000313|EMBL:KNA13726.1};	--	--	alpha/beta hydrolase fold
gene-LOC110695749	145.59	105.81	127.53	98.52	40.86	35.22	2895	2067	2495	1860	869	642	0.483	-1.049	0.00734871	0.0484134	down	NW_018744304.1	6182792	6185255	-	LOC110695749	--	K02865 large subunit ribosomal protein L10Ae | (RefSeq) 60S ribosomal protein L10a (A)	60S ribosomal protein L10a [Chenopodium quinoa]	RecName: Full=60S ribosomal protein L10a {ECO:0000303|PubMed:21205822};	RecName: Full=Ribosomal protein {ECO:0000256|RuleBase:RU000659};	60S ribosomal protein L10A	GO:0022625,cytosolic large ribosomal subunit; GO:0003723,RNA binding; GO:0003735,structural constituent of ribosome; GO:0000470,maturation of LSU-rRNA; GO:0006412,translation	Ribosomal protein L1p/L10e family
gene-LOC110695761	2.06	2.44	2.25	1.03	0.84	0.65	55	64	59	26	24	16	0.4	-1.321	0.00202545	0.0189716	down	NW_018744304.1	6678013	6681947	+	LOC110695761	--	K15287 solute carrier family 35, member F1/2 | (RefSeq) solute carrier family 35 member F2-like isoform X1 (A)	solute carrier family 35 member F2-like isoform X1 [Chenopodium quinoa]	--	SubName: Full=Uncharacterized protein {ECO:0000313|EMBL:KNA16917.1};	Predicted membrane protein	GO:0016021,integral component of membrane; GO:0022857,transmembrane transporter activity	Solute carrier family 35
gene-LOC110695812	0.73	0.53	1.32	0	0	0	28	20	50	0	0	0	0.007	-7.262	1.01141e-07	3.67155e-06	down	NW_018744304.1	5878264	5884639	-	LOC110695812	--	--	coiled-coil domain-containing protein 96-like [Chenopodium quinoa]	--	--	--	--	--
gene-LOC110695852	0.36	0.12	1.05	0.03	0	0.08	15	5	43	1	0	3	0.08	-3.637	0.00379114	0.0300412	down	NW_018744304.1	5970912	5972993	+	LOC110695852	--	K23541 Ca2+/H+ antiporter, TMEM165/GDT1 family | (RefSeq) pentatricopeptide repeat-containing protein At4g21065-like (A)	pentatricopeptide repeat-containing protein At2g27610-like [Chenopodium quinoa]	RecName: Full=Pentatricopeptide repeat-containing protein At2g27610;	SubName: Full=pentatricopeptide repeat-containing protein At4g33170-like {ECO:0000313|RefSeq:XP_010244917.1};	FOG: PPR repeat	GO:0043231,intracellular membrane-bounded organelle; GO:0004519,endonuclease activity; GO:0003723,RNA binding; GO:0008270,zinc ion binding; GO:0009451,RNA modification	PPR repeat family
gene-LOC110695895	0.29	0.2	0.23	0	0	0	9	6	7	0	0	0	0.028	-5.181	0.00322891	0.0267938	down	NW_018744311.1	264402	275625	+	LOC110695895	--	--	probable membrane metalloprotease ARASP2, chloroplastic [Chenopodium quinoa]	RecName: Full=Membrane metalloprotease ARASP, chloroplastic {ECO:0000303|PubMed:16413549}; EC=3.4.24.-; Flags: Precursor;	SubName: Full=Uncharacterized protein {ECO:0000313|EMBL:KNA22689.1};	--	GO:0009507,chloroplast; GO:0009706,chloroplast inner membrane; GO:0016021,integral component of membrane; GO:0046872,metal ion binding; GO:0004222,metalloendopeptidase activity; GO:0009658,chloroplast organization	Peptidase family M50
gene-LOC110695896	1.58	3.58	1.91	0.06	0.05	0.12	57	127	68	2	2	4	0.034	-4.893	3.9963e-10	2.23805e-08	down	NW_018744311.1	290826	292634	+	LOC110695896	--	--	probable membrane metalloprotease ARASP2, chloroplastic [Chenopodium quinoa]	RecName: Full=Membrane metalloprotease ARASP, chloroplastic {ECO:0000303|PubMed:16413549}; EC=3.4.24.-; Flags: Precursor;	SubName: Full=Uncharacterized protein {ECO:0000313|EMBL:KNA22689.1};	--	GO:0009507,chloroplast; GO:0009706,chloroplast inner membrane; GO:0016021,integral component of membrane; GO:0046872,metal ion binding; GO:0004222,metalloendopeptidase activity; GO:0009658,chloroplast organization	Peptidase family M50
gene-LOC110695940	0.24	0.18	0.32	0.05	0.03	0.02	15	11	20	3	2	1	0.146	-2.78	0.00252351	0.0223214	down	NW_018744311.1	614089	623663	+	LOC110695940	--	K15271 ATP-dependent DNA helicase HFM1/MER3 [EC:3.6.4.12] | (RefSeq) DExH-box ATP-dependent RNA helicase DExH17 (A)	putative pentatricopeptide repeat-containing protein At3g18840 [Chenopodium quinoa]	RecName: Full=Putative pentatricopeptide repeat-containing protein At3g18840;	SubName: Full=Uncharacterized protein {ECO:0000313|EMBL:KNA15695.1}; Flags: Fragment;	FOG: PPR repeat	GO:0043231,intracellular membrane-bounded organelle; GO:0004519,endonuclease activity; GO:0003723,RNA binding; GO:0009451,RNA modification	PPR repeat
gene-LOC110696003	3.4	2.14	8.93	1.53	1.8	1.5	131	81	338	56	74	53	0.398	-1.328	0.00466933	0.0348906	down	NW_018744311.1	1317431	1321123	-	LOC110696003	--	K08857 NIMA (never in mitosis gene a)-related kinase 1/4/5 [EC:2.7.11.1] | (RefSeq) serine/threonine-protein kinase Nek6-like (A)	serine/threonine-protein kinase Nek6-like [Chenopodium quinoa]	RecName: Full=Serine/threonine-protein kinase Nek6; EC=2.7.11.1; AltName: Full=NimA-related protein kinase 6; Short=AtNek6;	SubName: Full=Uncharacterized protein {ECO:0000313|EMBL:KNA05962.1};	Serine/threonine protein kinase	GO:0005524,ATP binding; GO:0004674,protein serine/threonine kinase activity; GO:0043622,cortical microtubule organization; GO:0010311,lateral root formation; GO:0010366,negative regulation of ethylene biosynthetic process; GO:0006468,protein phosphorylation	Protein kinase domain
gene-LOC110696028	10.89	7.54	15.15	2.32	4.12	6.04	366	249	501	74	148	186	0.428	-1.225	0.00464678	0.0347499	down	NW_018742359.1	2179083	2185435	+	LOC110696028	--	--	rRNA-processing protein EFG1-like [Chenopodium quinoa]	--	SubName: Full=Uncharacterized protein {ECO:0000313|EMBL:KNA24132.1};	Uncharacterized conserved protein	GO:0006364,rRNA processing	rRNA-processing protein Efg1
gene-LOC110696064	0.61	0	2.99	0.02	0.06	0	27	0	130	1	3	0	0.032	-4.95	0.00278492	0.0240471	down	NW_018744311.1	2053691	2058047	+	LOC110696064	--	K20558 transcription factor SPEECHLESS | (RefSeq) transcription factor SPEECHLESS-like (A)	transcription factor SPEECHLESS-like [Chenopodium quinoa]	RecName: Full=Transcription factor SPEECHLESS; AltName: Full=Basic helix-loop-helix protein 98; Short=AtbHLH98; Short=bHLH 98; AltName: Full=Transcription factor EN 19; AltName: Full=bHLH transcription factor bHLH098;	SubName: Full=Uncharacterized protein {ECO:0000313|EMBL:KNA17218.1};	--	GO:0005634,nucleus; GO:0003677,DNA binding; GO:0003700,DNA-binding transcription factor activity; GO:0046983,protein dimerization activity; GO:0006355,regulation of transcription, DNA-templated; GO:0010374,stomatal complex development; GO:0006351,transcription, DNA-templated	Helix-loop-helix DNA-binding domain
gene-LOC110696084	19.48	14.62	15.98	5.78	6.35	9.22	1047	772	845	295	365	454	0.465	-1.104	0.000871299	0.00991667	down	NW_018744311.1	2321167	2327866	+	LOC110696084	--	K05391 cyclic nucleotide gated channel, plant | (RefSeq) cyclic nucleotide-gated ion channel 1-like (A)	cyclic nucleotide-gated ion channel 1-like [Chenopodium quinoa]	RecName: Full=Cyclic nucleotide-gated ion channel 1; Short=AtCNGC1; AltName: Full=Cyclic nucleotide- and calmodulin-regulated ion channel 1;	SubName: Full=Uncharacterized protein {ECO:0000313|EMBL:KNA09522.1};	K+-channel ERG and related proteins, contain PAS/PAC sensor domain	GO:0005887,integral component of plasma membrane; GO:0005886,plasma membrane; GO:0005516,calmodulin binding; GO:0030552,cAMP binding; GO:0030553,cGMP binding; GO:0005216,ion channel activity; GO:0042391,regulation of membrane potential	Ion transport protein
gene-LOC110696098	8.72	5.16	14.66	5.82	3.91	2.29	1323	769	2189	839	635	318	0.475	-1.073	0.00593409	0.0414012	down	NW_018744311.1	2508842	2519738	-	LOC110696098	--	K00264 glutamate synthase (NADH) [EC:1.4.1.14] | (RefSeq) glutamate synthase 1 [NADH], chloroplastic-like isoform X1 (A)	glutamate synthase 1 [NADH]	RecName: Full=Glutamate synthase 1 [NADH], chloroplastic; EC=1.4.1.14; AltName: Full=NADH-dependent glutamate synthase 1; Short=NADH-GOGAT 1; Flags: Precursor;	SubName: Full=Uncharacterized protein {ECO:0000313|EMBL:KNA09359.1};	Glutamate synthase	GO:0009507,chloroplast; GO:0009570,chloroplast stroma; GO:0009536,plastid; GO:0051538,3 iron, 4 sulfur cluster binding; GO:0050660,flavin adenine dinucleotide binding; GO:0010181,FMN binding; GO:0016040,glutamate synthase (NADH) activity; GO:0005506,iron ion binding; GO:0019676,ammonia assimilation cycle; GO:0048589,developmental growth; GO:0006537,glutamate biosynthetic process; GO:0097054,L-glu…	Glutamine amidotransferases class-II
gene-LOC110696223	0.64	0.45	0.7	0	0	0	13	9	14	0	0	0	0.017	-5.865	0.000168488	0.00261367	down	NW_018744315.1	40020	43985	+	LOC110696223	--	K05287 phosphatidylinositol glycan, class F [EC:2.7.-.-] | (RefSeq) phosphatidylinositol-glycan biosynthesis class F protein-like (A)	protein SAWADEE HOMEODOMAIN HOMOLOG 1-like [Chenopodium quinoa]	RecName: Full=Protein SAWADEE HOMEODOMAIN HOMOLOG 1; AltName: Full=DNA-binding transcription factor 1;	SubName: Full=Uncharacterized protein {ECO:0000313|EMBL:KNA14434.1};	--	GO:0005634,nucleus; GO:0003682,chromatin binding; GO:0046872,metal ion binding; GO:0006306,DNA methylation; GO:0031047,gene silencing by RNA; GO:0006346,methylation-dependent chromatin silencing	--
gene-LOC110696226	130.14	157.45	109.21	38.2	43.79	46.12	1342	1595	1108	374	483	436	0.343	-1.544	8.35366e-06	0.000194662	down	NW_018744315.1	140839	141354	+	LOC110696226	--	--	lachrymatory-factor synthase-like [Chenopodium quinoa]	RecName: Full=Lachrymatory-factor synthase; Flags: Precursor;	SubName: Full=Uncharacterized protein {ECO:0000313|EMBL:KNA14432.1};	--	GO:0005773,vacuole	Polyketide cyclase / dehydrase and lipid transport
gene-LOC110696227	4.41	11.03	3.99	0	0	0.21	46	113	41	0	0	2	0.01	-6.576	2.20198e-07	7.46395e-06	down	NW_018744315.1	156736	157257	+	LOC110696227	--	--	lachrymatory-factor synthase-like [Chenopodium quinoa]	RecName: Full=Lachrymatory-factor synthase; Flags: Precursor;	SubName: Full=Uncharacterized protein {ECO:0000313|EMBL:KNA14432.1};	--	GO:0005773,vacuole	Polyketide cyclase / dehydrase and lipid transport
gene-LOC110696231	0.75	0.93	2.3	0.17	0.08	0.11	43	52	129	9	5	6	0.104	-3.268	4.95709e-08	1.89332e-06	down	NW_018744315.1	12970	22247	+	LOC110696231	--	K11793 cereblon | (RefSeq) uncharacterized protein LOC110696231 isoform X1 (A)	uncharacterized protein LOC110696231 isoform X1 [Chenopodium quinoa]	--	SubName: Full=Uncharacterized protein {ECO:0000313|EMBL:KNA14437.1};	Predicted ATP-dependent protease PIL, contains LON domain	GO:0046872,metal ion binding	ATP-dependent protease La (LON) substrate-binding domain
gene-LOC110696232	1.87	2.25	2.47	0.56	0.33	0.02	84	99	109	24	16	1	0.148	-2.759	0.000149608	0.00235602	down	NW_018744315.1	23290	29108	+	LOC110696232	--	K00029 malate dehydrogenase (oxaloacetate-decarboxylating)(NADP+) [EC:1.1.1.40] | (RefSeq) NADP-dependent malic enzyme-like (A)	NADP-dependent malic enzyme-like [Chenopodium quinoa]	RecName: Full=NADP-dependent malic enzyme; Short=NADP-ME; EC=1.1.1.40;	RecName: Full=Malic enzyme {ECO:0000256|RuleBase:RU003426};	NADP+-dependent malic enzyme	GO:0005737,cytoplasm; GO:0004471,malate dehydrogenase (decarboxylating) (NAD+) activity; GO:0004473,malate dehydrogenase (decarboxylating) (NADP+) activity; GO:0046872,metal ion binding; GO:0051287,NAD binding; GO:0008948,oxaloacetate decarboxylase activity	Malic enzyme, NAD binding domain
gene-LOC110696233	2.47	1.89	4.27	0.01	0.04	0	189	142	322	1	3	0	0.007	-7.157	1.35795e-18	3.01933e-16	down	NW_018744315.1	31517	37254	+	LOC110696233	--	K00924 kinase [EC:2.7.1.-] | (RefSeq) receptor protein kinase TMK1 (A)	receptor protein kinase TMK1-like [Chenopodium quinoa]	RecName: Full=Receptor protein kinase TMK1 {ECO:0000303|PubMed:1332795}; EC=2.7.11.1 {ECO:0000269|PubMed:1332795}; AltName: Full=BARK1-like kinase 1 {ECO:0000303|PubMed:23921992}; AltName: Full=Transmembrane kinase 1 {ECO:0000303|PubMed:1332795}; Flags: Precursor;	SubName: Full=Uncharacterized protein {ECO:0000313|EMBL:KNA14435.1};	--	GO:0005576,extracellular region; GO:0016021,integral component of membrane; GO:0005886,plasma membrane; GO:0005524,ATP binding; GO:0004675,transmembrane receptor protein serine/threonine kinase activity; GO:0007165,signal transduction	Protein tyrosine kinase
gene-LOC110696241	0.88	0.82	0.03	0	0	0	27	25	1	0	0	0	0.01	-6.584	0.00050283	0.00637567	down	NW_018744315.1	236995	239115	-	LOC110696241	--	K21435 ankyrin repeat domain-containing protein 6 | (RefSeq) ankyrin repeat and SAM domain-containing protein 1A isoform X1 (A)	ankyrin repeat-containing protein BDA1-like [Chenopodium quinoa]	RecName: Full=Ankyrin repeat-containing protein BDA1 {ECO:0000305}; AltName: Full=Protein BIAN DA 1 {ECO:0000303|PubMed:22740615};	SubName: Full=Uncharacterized protein {ECO:0000313|EMBL:KMS94826.1};	FOG: Ankyrin repeat	GO:0016021,integral component of membrane; GO:0005886,plasma membrane; GO:0045087,innate immune response; GO:0009751,response to salicylic acid	Ankyrin repeats (3 copies)
gene-LOC110696242	1.34	1.18	2.08	0	0	0	38	33	58	0	0	0	0.005	-7.689	3.88954e-09	1.82985e-07	down	NW_018744315.1	251210	261869	-	LOC110696242	--	--	uncharacterized protein LOC110696242 [Chenopodium quinoa]	--	SubName: Full=Uncharacterized protein {ECO:0000313|EMBL:KNA21883.1};	--	--	--
gene-LOC110696244	1.59	2.03	0.62	0	0	0	89	112	34	0	0	0	0.002	-8.697	5.09465e-10	2.7904e-08	down	NW_018744315.1	287010	290528	-	LOC110696244	--	K21435 ankyrin repeat domain-containing protein 6 | (RefSeq) ankyrin repeat-containing protein ITN1-like (A)	uncharacterized protein LOC110696244 [Chenopodium quinoa]	RecName: Full=Protein MAIN-LIKE 1 {ECO:0000303|PubMed:24635680};	SubName: Full=Uncharacterized protein {ECO:0000313|EMBL:KMS94826.1};	--	GO:0005634,nucleus; GO:0008483,transaminase activity; GO:0016458,gene silencing; GO:0010073,meristem maintenance; GO:0010082,regulation of root meristem growth	Plant mobile domain
gene-LOC110696245	7.75	14.48	2.87	0	0	0	189	347	69	0	0	0	0.001	-10.093	7.29032e-13	6.45314e-11	down	NW_018744315.1	279970	281190	-	LOC110696245	--	K21435 ankyrin repeat domain-containing protein 6 | (RefSeq) ankyrin repeat protein (A)	uncharacterized protein LOC110696245 [Chenopodium quinoa]	--	SubName: Full=Uncharacterized protein {ECO:0000313|EMBL:KMS94826.1};	--	GO:0016021,integral component of membrane	Domain of unknown function
gene-LOC110696246	14.06	10.52	22.36	0.07	0.13	0.08	200	147	313	1	2	1	0.007	-7.175	2.26128e-19	5.63118e-17	down	NW_018744315.1	108748	109459	+	LOC110696246	--	--	lachrymatory-factor synthase-like [Chenopodium quinoa]	RecName: Full=Lachrymatory-factor synthase; Flags: Precursor;	SubName: Full=lachrymatory-factor synthase {ECO:0000313|RefSeq:XP_018845489.1};	--	GO:0005773,vacuole	Polyketide cyclase / dehydrase and lipid transport
gene-LOC110696308	6.21	1.73	22.73	2.78	0.75	0.62	132	36	475	56	17	12	0.16	-2.643	0.00117869	0.0125474	down	NW_018744348.1	655158	658697	+	LOC110696308	--	--	uncharacterized protein LOC110696308 [Chenopodium quinoa]	--	SubName: Full=Uncharacterized protein {ECO:0000313|EMBL:KNA04766.1};	--	--	Rdx family
gene-LOC110696312	15.14	16.01	16.45	9.9	3.68	4.59	335	348	358	208	87	93	0.399	-1.324	0.000633362	0.0076937	down	NW_018744348.1	757073	784340	+	LOC110696312	--	--	outer envelope pore protein 24, chloroplastic-like [Chenopodium quinoa]	RecName: Full=Outer envelope pore protein 24, chloroplastic; AltName: Full=Chloroplastic outer envelope pore protein of 24 kDa;	SubName: Full=Uncharacterized protein {ECO:0000313|EMBL:KNA04033.1};	--	GO:0034426,etioplast membrane; GO:0031359,integral component of chloroplast outer membrane; GO:0046930,pore complex; GO:0015288,porin activity; GO:0022843,voltage-gated cation channel activity; GO:0034765,regulation of ion transmembrane transport	--
gene-LOC110696387	4.14	4.54	4.04	0	0	0	78	84	75	0	0	0	0.003	-8.629	1.28569e-11	9.41679e-10	down	NW_018744362.1	1012815	1016476	+	LOC110696387	--	--	--	--	--	--	--	--
gene-LOC110696390	5.76	3.76	5.97	2.3	0.78	1.65	103	66	105	39	15	27	0.329	-1.603	0.000339542	0.00464929	down	NW_018744362.1	1317605	1319164	-	LOC110696390	--	K00799 glutathione S-transferase [EC:2.5.1.18] | (RefSeq) probable glutathione S-transferase parC (A)	probable glutathione S-transferase parC [Chenopodium quinoa]	RecName: Full=Probable glutathione S-transferase parC; EC=2.5.1.18; AltName: Full=Auxin-regulated protein parC;	SubName: Full=Uncharacterized protein {ECO:0000313|EMBL:KMS98021.1};	Glutathione S-transferase	GO:0004364,glutathione transferase activity; GO:0009734,auxin-activated signaling pathway	Glutathione S-transferase, C-terminal domain
gene-LOC110696438	65.2	73.77	39.92	34.14	25.25	22.17	1084	1205	653	539	449	338	0.469	-1.094	0.00618211	0.0425948	down	NW_018742204.1	20284969	20286209	+	LOC110696438	--	--	uncharacterized protein LOC110696438 [Chenopodium quinoa]	--	SubName: Full=Uncharacterized protein {ECO:0000313|EMBL:KNA12838.1};	--	--	--
gene-LOC110696471	0.62	0.43	0.9	0	0	0	16	11	23	0	0	0	0.013	-6.311	1.89636e-05	0.000404087	down	NW_018744367.1	429425	433099	-	LOC110696471	--	--	--	--	--	--	--	--
gene-LOC110696482	153.28	118.49	181.32	108.87	40.75	49.27	2423	1840	2820	1634	689	714	0.47	-1.09	0.00199152	0.0187213	down	NW_018744367.1	642292	643082	+	LOC110696482	--	K02977 small subunit ribosomal protein S27Ae | (RefSeq) ubiquitin-40S ribosomal protein S27a (A)	hypothetical protein POPTR_002G190000v3 [Populus trichocarpa]	RecName: Full=Ubiquitin-40S ribosomal protein S27a; Contains: RecName: Full=Ubiquitin; Contains: RecName: Full=40S ribosomal protein S27a; Flags: Precursor;	SubName: Full=Uncharacterized protein {ECO:0000313|EMBL:GAY66909.1};	Ubiquitin/40S ribosomal protein S27a fusion	GO:0005634,nucleus; GO:0005840,ribosome; GO:0046872,metal ion binding; GO:0003735,structural constituent of ribosome; GO:0006412,translation	Ubiquitin family
gene-LOC110696518	3.52	4.23	2.57	0	0	0	106	125	76	0	0	0	0.002	-9.036	3.52309e-12	2.87968e-10	down	NW_018744367.1	1831117	1836423	+	LOC110696518	--	--	--	--	--	--	--	--
gene-LOC110696524	124.83	96.35	136.63	73.92	37.14	38.09	4368	3312	4704	2456	1390	1222	0.448	-1.16	4.5126e-05	0.000861777	down	NW_018744367.1	1990451	1994001	-	LOC110696524	--	K03233 elongation factor 1-gamma | (RefSeq) elongation factor 1-gamma 2-like (A)	elongation factor 1-gamma 2-like [Chenopodium quinoa]	RecName: Full=Elongation factor 1-gamma 2; Short=EF-1-gamma 2; AltName: Full=eEF-1B gamma 2;	SubName: Full=Uncharacterized protein {ECO:0000313|EMBL:KNA06800.1};	Glutathione S-transferase	GO:0005737,cytoplasm; GO:0005634,nucleus; GO:0004364,glutathione transferase activity; GO:0003746,translation elongation factor activity; GO:0006749,glutathione metabolic process	Elongation factor 1 gamma, conserved domain
gene-LOC110696549	27.96	21.91	30	18.87	6.07	6.84	504	388	532	323	117	113	0.42	-1.253	0.00309226	0.0259992	down	NW_018742372.1	13536	15763	-	LOC110696549	--	K02891 large subunit ribosomal protein L22e | (RefSeq) 60S ribosomal protein L22-3 (A)	PREDICTED: 60S ribosomal protein L22-3 [Beta vulgaris subsp. vulgaris]	RecName: Full=60S ribosomal protein L22-2;	SubName: Full=Uncharacterized protein {ECO:0000313|EMBL:KNA18998.1};	60S ribosomal protein L22	GO:0005829,cytosol; GO:0022625,cytosolic large ribosomal subunit; GO:0022626,cytosolic ribosome; GO:0005730,nucleolus; GO:0005886,plasma membrane; GO:0009506,plasmodesma; GO:0042788,polysomal ribosome; GO:0003729,mRNA binding; GO:0003723,RNA binding; GO:0003735,structural constituent of ribosome; GO:0002181,cytoplasmic translation	Ribosomal L22e protein family
gene-LOC110696558	57.32	55.98	69.04	47.12	17.86	15.95	984	944	1166	768	328	251	0.467	-1.098	0.00612559	0.0423549	down	NW_018742372.1	76682	78865	-	LOC110696558	--	K02891 large subunit ribosomal protein L22e | (RefSeq) 60S ribosomal protein L22-3 (A)	PREDICTED: 60S ribosomal protein L22-3 [Beta vulgaris subsp. vulgaris]	RecName: Full=60S ribosomal protein L22-2;	SubName: Full=Uncharacterized protein {ECO:0000313|EMBL:KNA18998.1};	60S ribosomal protein L22	GO:0005829,cytosol; GO:0022625,cytosolic large ribosomal subunit; GO:0022626,cytosolic ribosome; GO:0005730,nucleolus; GO:0005886,plasma membrane; GO:0009506,plasmodesma; GO:0042788,polysomal ribosome; GO:0003729,mRNA binding; GO:0003723,RNA binding; GO:0003735,structural constituent of ribosome; GO:0002181,cytoplasmic translation	Ribosomal L22e protein family
gene-LOC110696601	0.65	0.85	1.36	0.04	0	0	18	23	37	1	0	0	0.016	-6.002	1.16033e-05	0.000260475	down	NW_018744367.1	5774180	5776417	-	LOC110696601	--	--	--	--	--	--	--	--
gene-LOC110696607	12.95	7.42	18.16	8.51	4.21	3.04	279	157	385	174	97	60	0.452	-1.147	0.00597087	0.0415646	down	NW_018744367.1	6212073	6214349	+	LOC110696607	--	K09377 cysteine and glycine-rich protein | (RefSeq) LIM domain-containing protein WLIM1-like (A)	LIM domain-containing protein WLIM1-like [Chenopodium quinoa]	RecName: Full=LIM domain-containing protein WLIM1 {ECO:0000305}; AltName: Full=Widely-expressed LIM protein 1 {ECO:0000303|PubMed:11085265}; Short=AtWLIM1;	SubName: Full=Uncharacterized protein {ECO:0000313|EMBL:KNA17338.1};	Regulatory protein MLP and related LIM proteins	GO:0005737,cytoplasm; GO:0005856,cytoskeleton; GO:0005886,plasma membrane; GO:0051015,actin filament binding; GO:0046872,metal ion binding; GO:0003729,mRNA binding; GO:0051017,actin filament bundle assembly	LIM domain
gene-LOC110696641	4.7	4.35	7.03	1.14	0.65	0.63	196	178	288	45	29	24	0.165	-2.6	1.42078e-16	2.3799e-14	down	NW_018744367.1	8937710	8941448	+	LOC110696641	--	K11294 nucleolin | (RefSeq) nucleolin 2-like (A)	nucleolin 2-like [Chenopodium quinoa]	RecName: Full=28 kDa ribonucleoprotein, chloroplastic; Short=28RNP;	SubName: Full=Uncharacterized protein {ECO:0000313|EMBL:KNA24556.1};	FOG: RRM domain	GO:0009507,chloroplast; GO:0030529,NA; GO:0003723,RNA binding; GO:0006397,mRNA processing	RNA recognition motif. (a.k.a. RRM, RBD, or RNP domain)
gene-LOC110696760	1.67	0.93	2.76	0	0	0	75	41	122	0	0	0	0.003	-8.533	4.64288e-11	3.09697e-09	down	NW_018744367.1	1019690	1023166	+	LOC110696760	--	--	--	--	--	--	--	--
gene-LOC110696761	6.35	5.53	6.41	0	0	0	138	118	137	0	0	0	0.002	-9.337	4.61548e-14	5.22728e-12	down	NW_018744367.1	1025980	1027357	+	LOC110696761	--	--	--	--	--	--	--	--
gene-LOC110696768	18.98	17.74	30.69	0	0	0	110	101	175	0	0	0	0.002	-9.27	6.59706e-14	7.29073e-12	down	NW_018744367.1	3077816	3078361	+	LOC110696768	--	--	--	--	--	--	--	--
gene-LOC110696775	0.4	0.16	0.25	0	0	0	10	4	6	0	0	0	0.031	-5.034	0.00646296	0.0440864	down	NW_018744367.1	3858560	3859881	+	LOC110696775	--	--	uncharacterized protein LOC110696775 [Chenopodium quinoa]	--	--	--	--	--
gene-LOC110696805	69.63	52.22	74	41.1	13.06	14.35	942	694	985	528	189	178	0.369	-1.438	0.000706042	0.00838056	down	NW_018742372.1	1413530	1414206	-	LOC110696805	--	K02901 large subunit ribosomal protein L27e | (RefSeq) 60S ribosomal protein L27-1-like (A)	60S ribosomal protein L27-1-like [Chenopodium quinoa]	RecName: Full=60S ribosomal protein L27-1;	RecName: Full=60S ribosomal protein L27 {ECO:0000256|RuleBase:RU000575};	60S ribosomal protein L27	GO:0022625,cytosolic large ribosomal subunit; GO:0016020,membrane; GO:0003735,structural constituent of ribosome; GO:0006412,translation	Ribosomal L27e protein family
gene-LOC110696824	1.09	0.48	0.91	0	0	0	23	10	19	0	0	0	0.012	-6.391	1.83871e-05	0.000393374	down	NW_018744369.1	19627	23972	+	LOC110696824	--	--	--	--	--	--	--	--
gene-LOC110696833	2.82	0.93	4.9	0	0	0.2	31	10	53	0	0	2	0.026	-5.266	7.11714e-05	0.00126356	down	NW_018744369.1	1083088	1085047	-	LOC110696833	--	--	--	--	--	--	--	--
gene-LOC110696840	0.55	0.38	0.74	0.05	0.07	0.08	22	15	29	2	3	3	0.138	-2.858	0.0002964	0.0041623	down	NW_018744369.1	1166790	1181339	+	LOC110696840	--	K00549 5-methyltetrahydropteroyltriglutamate--homocysteine methyltransferase [EC:2.1.1.14] | (RefSeq) 5-methyltetrahydropteroyltriglutamate-- homocysteine methyltransferase-like (A)	uncharacterized protein LOC110696840 [Chenopodium quinoa]	RecName: Full=5-methyltetrahydropteroyltriglutamate--homocysteine methyltransferase; EC=2.1.1.14; AltName: Full=Cobalamin-independent methionine synthase isozyme; AltName: Full=Vitamin-B12-independent methionine synthase isozyme;	SubName: Full=Uncharacterized protein {ECO:0000313|EMBL:GAY32379.1}; Flags: Fragment;	Methionine synthase II (cobalamin-independent)	GO:0005737,cytoplasm; GO:0003871,5-methyltetrahydropteroyltriglutamate-homocysteine S-methyltransferase activity; GO:0008270,zinc ion binding; GO:0009086,methionine biosynthetic process	Cobalamin-independent synthase, Catalytic domain
gene-LOC110696846	2.55	1.2	3.25	0.34	0.49	0.21	39	18	49	5	8	3	0.172	-2.54	0.00016459	0.00256384	down	NW_018744369.1	737140	738716	+	LOC110696846	--	--	--	--	--	--	--	--
gene-LOC110696891	1.62	0.69	1.12	0.34	0.03	0.04	50	21	34	10	1	1	0.122	-3.035	0.00109867	0.0118646	down	NW_018744410.1	6805	12458	+	LOC110696891	--	K23553 post-GPI attachment to proteins factor 3 | (RefSeq) post-GPI attachment to proteins factor 3-like (A)	post-GPI attachment to proteins factor 3-like [Chenopodium quinoa]	--	SubName: Full=Uncharacterized protein {ECO:0000313|EMBL:KNA22127.1};	Predicted membrane protein	GO:0016021,integral component of membrane	Per1-like family
gene-LOC110696930	5.29	4.15	5.59	1.63	1.24	1.93	284	219	295	83	71	95	0.349	-1.519	1.04968e-07	3.79938e-06	down	NW_018744420.1	391330	395060	+	LOC110696930	--	--	uncharacterized protein LOC110696930 isoform X1 [Chenopodium quinoa]	--	SubName: Full=Uncharacterized protein {ECO:0000313|EMBL:KNA13421.1};	--	--	--
gene-LOC110697006	17.33	4.39	54.41	4.37	2.43	2.57	213	53	658	51	32	29	0.15	-2.741	6.71322e-05	0.00120618	down	NW_018744452.1	147613	148227	+	LOC110697006	--	K11252 histone H2B | (RefSeq) probable histone H2B.1 (A)	PREDICTED: probable histone H2B.1 isoform X1 [Beta vulgaris subsp. vulgaris]	RecName: Full=Histone H2B.11;	RecName: Full=Histone H2B {ECO:0000256|RuleBase:RU000451};	Histone H2B	GO:0000786,nucleosome; GO:0005634,nucleus; GO:0003677,DNA binding; GO:0046982,protein heterodimerization activity	Core histone H2A/H2B/H3/H4
gene-LOC110697076	265.1	187.31	261.08	171.91	69.34	55.4	5319	3692	5154	3275	1488	1019	0.439	-1.187	0.00323469	0.026827	down	NW_018744460.1	650665	652972	-	LOC110697076	--	K02896 large subunit ribosomal protein L24e | (RefSeq) 60S ribosomal protein L24 (A)	60S ribosomal protein L24 [Chenopodium quinoa]	RecName: Full=60S ribosomal protein L24;	SubName: Full=Uncharacterized protein {ECO:0000313|EMBL:KNA23907.1};	60s ribosomal protein L24	GO:0005840,ribosome	Ribosomal protein L24e
gene-LOC110697091	83.91	34.53	105.11	23.07	12.79	21.23	2988	1208	3683	780	487	693	0.289	-1.792	1.73355e-06	4.79414e-05	down	NW_018744460.1	790514	796734	-	LOC110697091	--	--	protein IQ-DOMAIN 14-like [Chenopodium quinoa]	--	SubName: Full=Uncharacterized protein {ECO:0000313|EMBL:KNA17091.1};	--	--	Protein of unknown function (DUF4005)
gene-LOC110697182	13.66	7.55	19.29	7.97	3.16	2.02	457	248	635	253	113	62	0.355	-1.493	0.00227954	0.0206964	down	NW_018744460.1	1765386	1771145	+	LOC110697182	--	K14826 FK506-binding nuclear protein [EC:5.2.1.8] | (RefSeq) peptidyl-prolyl cis-trans isomerase FKBP53-like (A)	peptidyl-prolyl cis-trans isomerase FKBP53-like [Chenopodium quinoa]	RecName: Full=Peptidyl-prolyl cis-trans isomerase FKBP53; Short=PPIase FKBP53; EC=5.2.1.8; AltName: Full=FK506-binding protein 53; Short=AtFKBP53; AltName: Full=Immunophilin FKBP53; AltName: Full=Rotamase;	RecName: Full=FK506-binding protein {ECO:0000256|PIRNR:PIRNR001473};	FKBP-type peptidyl-prolyl cis-trans isomerase	GO:0005829,cytosol; GO:0005730,nucleolus; GO:0005634,nucleus; GO:0005528,FK506 binding; GO:0042393,histone binding; GO:0003755,peptidyl-prolyl cis-trans isomerase activity; GO:0000412,histone peptidyl-prolyl isomerization; GO:0006334,nucleosome assembly	FKBP-type peptidyl-prolyl cis-trans isomerase
gene-LOC110697189	208.85	191.63	241.55	171.07	67.28	62.61	3631	3273	4132	2824	1251	998	0.495	-1.015	0.00692414	0.0463188	down	NW_018744460.1	1847034	1849269	+	LOC110697189	--	K02969 small subunit ribosomal protein S20e | (RefSeq) 40S ribosomal protein S20-2-like (A)	40S ribosomal protein S20-2-like [Chenopodium quinoa]	RecName: Full=40S ribosomal protein S20-2;	SubName: Full=Uncharacterized protein {ECO:0000313|EMBL:KMS95107.1};	40S ribosomal protein S20	GO:0005618,cell wall; GO:0005829,cytosol; GO:0022626,cytosolic ribosome; GO:0022627,cytosolic small ribosomal subunit; GO:0016020,membrane; GO:0005730,nucleolus; GO:0009506,plasmodesma; GO:0042788,polysomal ribosome; GO:0003729,mRNA binding; GO:0003735,structural constituent of ribosome; GO:0002181,cytoplasmic translation	Ribosomal protein S10p/S20e
gene-LOC110697198	9.79	9.76	9.19	4.44	3.62	5.19	144	141	133	62	57	70	0.495	-1.013	0.00279583	0.0241134	down	NW_018744460.1	1921889	1923903	-	LOC110697198	--	--	--	--	--	--	--	--
gene-LOC110697208	9.12	6.79	18.52	4.8	1.74	2.2	466	341	931	233	95	103	0.284	-1.817	1.7138e-05	0.000369189	down	NW_018744460.1	2037974	2046062	+	LOC110697208	--	K00382 dihydrolipoamide dehydrogenase [EC:1.8.1.4] | (RefSeq) dihydrolipoyl dehydrogenase 2, chloroplastic-like (A)	dihydrolipoyl dehydrogenase 2, chloroplastic-like [Chenopodium quinoa]	RecName: Full=Dihydrolipoyl dehydrogenase 1, chloroplastic; Short=ptLPD1; EC=1.8.1.4; AltName: Full=Dihydrolipoamide dehydrogenase 1; AltName: Full=Protein LIPOAMIDE DEHYDROGENASE 1; AltName: Full=Pyruvate dehydrogenase complex E3 subunit 1; Short=E3-1; Short=PDC-E3 1; Flags: Precursor;	RecName: Full=Dihydrolipoyl dehydrogenase {ECO:0000256|RuleBase:RU003692}; EC=1.8.1.4 {ECO:0000256|RuleBase:RU003692};	Dihydrolipoamide dehydrogenase	GO:0009507,chloroplast; GO:0009941,chloroplast envelope; GO:0009570,chloroplast stroma; GO:0005730,nucleolus; GO:0004148,dihydrolipoyl dehydrogenase activity; GO:0050660,flavin adenine dinucleotide binding; GO:0006086,acetyl-CoA biosynthetic process from pyruvate; GO:0045454,cell redox homeostasis; GO:0046685,response to arsenic-containing substance	Pyridine nucleotide-disulphide oxidoreductase
gene-LOC110697209	225.54	150.59	193.82	121.6	41.51	51.01	2479	1626	2096	1269	488	514	0.395	-1.341	0.000807387	0.00931412	down	NW_018744460.1	2048571	2049340	-	LOC110697209	--	K02905 large subunit ribosomal protein L29e | (RefSeq) 60S ribosomal protein L29-1-like (A)	60S ribosomal protein L29-1-like [Chenopodium quinoa]	RecName: Full=60S ribosomal protein L29-1;	RecName: Full=60S ribosomal protein L29 {ECO:0000256|RuleBase:RU364026};	60S ribosomal protein L29	GO:0022625,cytosolic large ribosomal subunit; GO:0005730,nucleolus; GO:0003735,structural constituent of ribosome; GO:0002181,cytoplasmic translation	Ribosomal L29e protein family
gene-LOC110697218	1.66	1.01	5.63	0.45	0.25	0	50	30	167	13	8	0	0.099	-3.333	0.000334427	0.00459271	down	NW_018744460.1	2158871	2160783	-	LOC110697218	--	K16292 KDEL-tailed cysteine endopeptidase [EC:3.4.22.-] | (RefSeq) vignain-like (A)	vignain-like [Chenopodium quinoa]	RecName: Full=KDEL-tailed cysteine endopeptidase CEP1; EC=3.4.22.-; AltName: Full=Cysteine proteinase CP56; Short=AtCP56; Flags: Precursor;	SubName: Full=Uncharacterized protein {ECO:0000313|EMBL:KNA07795.1};	Cysteine proteinase Cathepsin L	GO:0005783,endoplasmic reticulum; GO:0005615,extracellular space; GO:0005764,lysosome; GO:0009505,plant-type cell wall; GO:0000325,plant-type vacuole; GO:0004197,cysteine-type endopeptidase activity; GO:0048658,anther wall tapetum development; GO:0050832,defense response to fungus; GO:0009626,plant-type hypersensitive response; GO:0009555,pollen development; GO:0010623,programmed cell death invol…	Papain family cysteine protease
gene-LOC110697248	2.4	2.68	5.51	2.05	0.5	0.56	80	88	181	65	18	17	0.319	-1.647	0.00444207	0.0336365	down	NW_018744460.1	2440203	2442930	-	LOC110697248	--	--	cysteine-rich repeat secretory protein 11-like [Chenopodium quinoa]	RecName: Full=Cysteine-rich repeat secretory protein 3; AltName: Full=Plasmodesmata-located protein 2; Short=PDLP2; Flags: Precursor;	SubName: Full=Uncharacterized protein {ECO:0000313|EMBL:KNA06540.1};	--	GO:0016021,integral component of membrane; GO:0009506,plasmodesma; GO:0010497,plasmodesmata-mediated intercellular transport; GO:0046739,transport of virus in multicellular host	Salt stress response/antifungal
gene-LOC110697253	289.4	183.86	277.07	188.24	61.81	58.5	4430	2765	4173	2736	1012	821	0.433	-1.206	0.00612635	0.0423549	down	NW_018744460.1	2509175	2511869	+	LOC110697253	--	K02894 large subunit ribosomal protein L23e | (RefSeq) 60S ribosomal protein L23 (A)	60S ribosomal protein L23 [Chenopodium quinoa]	RecName: Full=60S ribosomal protein L23; AltName: Full=Protein EMBRYO DEFECTIVE 2171;	SubName: Full=Uncharacterized protein {ECO:0000313|EMBL:KNA16312.1};	60S ribosomal protein L14/L17/L23	GO:0022625,cytosolic large ribosomal subunit; GO:0005730,nucleolus; GO:0070180,large ribosomal subunit rRNA binding; GO:0003735,structural constituent of ribosome; GO:0006412,translation	Ribosomal protein L14p/L23e
gene-LOC110697411	3.71	10.06	1.36	0.19	0.92	0.98	83	221	30	4	22	20	0.14	-2.841	0.00172825	0.0168468	down	NW_018744460.1	1113513	1114631	-	LOC110697411	--	K09286 EREBP-like factor | (RefSeq) dehydration-responsive element-binding protein 1A-like (A)	dehydration-responsive element-binding protein 1A-like [Chenopodium quinoa]	RecName: Full=Dehydration-responsive element-binding protein 1A {ECO:0000303|PubMed:9707537}; Short=Protein DREB1A {ECO:0000303|PubMed:9707537}; AltName: Full=C-repeat/dehydration-responsive element-binding factor 3 {ECO:0000303|PubMed:9881163}; Short=C-repeat-binding factor 3 {ECO:0000303|PubMed:9881163}; Short=CRT/DRE-binding factor 3 {ECO:0000303|PubMed:9881163}; AltName: Full=Cold resistance-…	SubName: Full=Uncharacterized protein {ECO:0000313|EMBL:KNA09465.1};	--	GO:0005634,nucleus; GO:0003677,DNA binding; GO:0003700,DNA-binding transcription factor activity; GO:0009631,cold acclimation; GO:0009409,response to cold; GO:0009414,response to water deprivation; GO:0006351,transcription, DNA-templated	AP2 domain
gene-LOC110697482	10.88	10.27	12.24	0.86	0.33	0.48	373	346	413	28	12	15	0.053	-4.235	9.79386e-32	8.71047e-29	down	NW_018744464.1	527688	547487	+	LOC110697482	--	K10743 ribonuclease H2 subunit A [EC:3.1.26.4] | (RefSeq) ribonuclease H2 subunit A-like (A)	ribonuclease H2 subunit A-like [Chenopodium quinoa]	RecName: Full=Ribonuclease H2 subunit A; Short=RNase H2 subunit A; EC=3.1.26.4; AltName: Full=Ribonuclease HI large subunit; Short=RNase HI large subunit; AltName: Full=Ribonuclease HI subunit A;	RecName: Full=Ribonuclease {ECO:0000256|RuleBase:RU003515}; EC=3.1.26.- {ECO:0000256|RuleBase:RU003515};	Ribonuclease HI	GO:0032299,ribonuclease H2 complex; GO:0046872,metal ion binding; GO:0003723,RNA binding; GO:0004523,RNA-DNA hybrid ribonuclease activity; GO:0043137,DNA replication, removal of RNA primer; GO:0006298,mismatch repair	Ribonuclease HII
gene-LOC110697493	187.43	153.05	207.71	128.79	58.19	57.49	3165	2539	3451	2065	1051	890	0.475	-1.073	0.000893479	0.0101175	down	NW_018744464.1	1104250	1106294	+	LOC110697493	--	K02962 small subunit ribosomal protein S17e | (RefSeq) 40S ribosomal protein S17-like (A)	40S ribosomal protein S17-like [Chenopodium quinoa]	RecName: Full=40S ribosomal protein S17-4;	SubName: Full=Uncharacterized protein {ECO:0000313|EMBL:KMS97926.1};	40S ribosomal protein S17	GO:0022627,cytosolic small ribosomal subunit; GO:0003729,mRNA binding; GO:0003735,structural constituent of ribosome; GO:0000028,ribosomal small subunit assembly; GO:0006412,translation	Ribosomal S17
gene-LOC110697495	7.67	7.48	9.76	0.62	0.58	0.41	432	414	541	33	35	21	0.071	-3.821	1.50133e-42	3.50505e-39	down	NW_018744466.1	77844	80884	+	LOC110697495	--	--	--	--	--	--	--	--
gene-LOC110697499	22.4	17.9	29.79	4.79	2.44	2.41	833	654	1090	169	97	82	0.15	-2.74	4.8121e-21	1.46139e-18	down	NW_018744466.1	551104	557173	-	LOC110697499	--	K00134 glyceraldehyde 3-phosphate dehydrogenase [EC:1.2.1.12] | (RefSeq) glyceraldehyde-3-phosphate dehydrogenase GAPCP2, chloroplastic-like (A)	glyceraldehyde-3-phosphate dehydrogenase GAPCP2, chloroplastic-like [Chenopodium quinoa]	RecName: Full=Glyceraldehyde-3-phosphate dehydrogenase GAPCP2, chloroplastic; EC=1.2.1.12; AltName: Full=Glyceraldehyde-3-phosphate dehydrogenase of plastid 2; AltName: Full=NAD-dependent glyceraldehydephosphate dehydrogenase chloroplastic 2; Flags: Precursor;	RecName: Full=Glyceraldehyde-3-phosphate dehydrogenase {ECO:0000256|RuleBase:RU361160}; EC=1.2.1.- {ECO:0000256|RuleBase:RU361160};	Glyceraldehyde 3-phosphate dehydrogenase	GO:0009570,chloroplast stroma; GO:0009536,plastid; GO:0004365,glyceraldehyde-3-phosphate dehydrogenase (NAD+) (phosphorylating) activity; GO:0051287,NAD binding; GO:0050661,NADP binding; GO:0080144,amino acid homeostasis; GO:0005975,carbohydrate metabolic process; GO:0006006,glucose metabolic process; GO:0006096,glycolytic process; GO:0080022,primary root development	Glyceraldehyde 3-phosphate dehydrogenase, C-terminal domain
gene-LOC110697500	3.59	5.94	4.79	1.58	1.3	1.4	67	109	88	28	26	24	0.319	-1.65	0.000139633	0.0022233	down	NW_018744466.1	780558	782124	+	LOC110697500	--	--	--	--	--	--	--	--
gene-LOC110697563	323.56	234.63	327.32	211.37	81.58	83.07	4287	3054	4267	2659	1156	1009	0.45	-1.152	0.0020028	0.0188113	down	NW_018744469.1	2098089	2098751	+	LOC110697563	--	K02901 large subunit ribosomal protein L27e | (RefSeq) 60S ribosomal protein L27-2-like (A)	60S ribosomal protein L27-2-like [Chenopodium quinoa]	RecName: Full=60S ribosomal protein L27-2;	RecName: Full=60S ribosomal protein L27 {ECO:0000256|RuleBase:RU000575};	60S ribosomal protein L27	GO:0005829,cytosol; GO:0022625,cytosolic large ribosomal subunit; GO:0022626,cytosolic ribosome; GO:0042788,polysomal ribosome; GO:0003735,structural constituent of ribosome; GO:0006412,translation	Ribosomal L27e protein family
gene-LOC110697655	2.28	2.28	6.49	1.59	0.57	0.46	147	144	411	97	39	27	0.265	-1.914	0.000356351	0.00483868	down	NW_018744491.1	55033	60466	-	LOC110697655	--	K17964 leucine-rich PPR motif-containing protein, mitochondrial | (RefSeq) hypothetical protein (A)	putative pentatricopeptide repeat-containing protein At3g16890, mitochondrial [Chenopodium quinoa]	RecName: Full=Putative pentatricopeptide repeat-containing protein At3g16890, mitochondrial; AltName: Full=Protein PENTATRICOPEPTIDE REPEAT 40; Flags: Precursor;	SubName: Full=Uncharacterized protein {ECO:0000313|EMBL:KNA16234.1};	FOG: PPR repeat	GO:0005739,mitochondrion; GO:0004519,endonuclease activity; GO:0003723,RNA binding; GO:0042775,mitochondrial ATP synthesis coupled electron transport; GO:0009737,response to abscisic acid; GO:0006979,response to oxidative stress; GO:0009651,response to salt stress; GO:0009451,RNA modification	PPR repeat family
gene-LOC110697656	0.75	0.97	1.37	0.06	0.17	0.2	25	32	45	2	6	6	0.156	-2.683	9.08084e-05	0.00155456	down	NW_018744491.1	61268	62942	+	LOC110697656	--	--	--	--	--	--	--	--
gene-LOC110697674	50.09	38.31	41.45	26.24	8.02	11.22	969	728	789	482	166	199	0.364	-1.458	0.000636642	0.00772366	down	NW_018744497.1	255214	256181	-	LOC110697674	--	K02870 large subunit ribosomal protein L12e | (RefSeq) 60S ribosomal protein L12-1 (A)	60S ribosomal protein L12-1 [Chenopodium quinoa]	RecName: Full=60S ribosomal protein L12-1;	SubName: Full=Uncharacterized protein {ECO:0000313|EMBL:KNA25907.1};	40S ribosomal protein S2	GO:0009507,chloroplast; GO:0005829,cytosol; GO:0022625,cytosolic large ribosomal subunit; GO:0022626,cytosolic ribosome; GO:0005730,nucleolus; GO:0005634,nucleus; GO:0009506,plasmodesma; GO:0005773,vacuole; GO:0019843,rRNA binding; GO:0003735,structural constituent of ribosome; GO:0008270,zinc ion binding; GO:0009409,response to cold; GO:0000027,ribosomal large subunit assembly; GO:0006412,transl…	Ribosomal protein L11, N-terminal domain
gene-LOC110697677	0.39	0.28	1.23	0	0.02	0	24	17	74	0	1	0	0.011	-6.473	4.30196e-06	0.000107561	down	NW_018744497.1	295418	298693	+	LOC110697677	--	--	--	--	--	--	--	--
gene-LOC110697697	287.18	176.84	312.87	178.32	69.84	54.58	7409	4482	7942	4368	1927	1291	0.417	-1.262	0.00261755	0.0229433	down	NW_018744497.1	1274574	1278135	+	LOC110697697	--	K11294 nucleolin | (RefSeq) 29 kDa ribonucleoprotein A, chloroplastic-like (A)	29 kDa ribonucleoprotein A, chloroplastic-like [Chenopodium quinoa]	RecName: Full=RNA-binding protein CP29B, chloroplastic {ECO:0000305}; AltName: Full=Ribonucleoprotein At2g37220; Flags: Precursor;	SubName: Full=Uncharacterized protein {ECO:0000313|EMBL:KNA09687.1};	FOG: RRM domain	GO:0009507,chloroplast; GO:0009941,chloroplast envelope; GO:0009570,chloroplast stroma; GO:0009534,chloroplast thylakoid; GO:0009535,chloroplast thylakoid membrane; GO:0030529,NA; GO:0010319,stromule; GO:0009579,thylakoid; GO:0003729,mRNA binding; GO:0008266,poly(U) RNA binding; GO:0045087,innate immune response; GO:0006397,mRNA processing; GO:0009737,response to abscisic acid; GO:0009409,respons…	RNA recognition motif. (a.k.a. RRM, RBD, or RNP domain)
gene-LOC110697744	22.6	21.37	22.08	1.23	1.56	1.42	676	628	650	35	50	39	0.069	-3.848	9.07403e-37	9.96916e-34	down	NW_018744498.1	919864	924138	-	LOC110697744	--	--	--	--	--	--	--	--
gene-LOC110697753	1.1	0.56	2.42	0	0	0	38	19	82	0	0	0	0.005	-7.723	2.58856e-08	1.054e-06	down	NW_018744498.1	2588885	2591387	-	LOC110697753	--	--	uncharacterized protein LOC110697753 [Chenopodium quinoa]	--	SubName: Full=Uncharacterized protein {ECO:0000313|EMBL:KNA09792.1}; Flags: Fragment;	--	GO:0008234,cysteine-type peptidase activity	Ulp1 protease family, C-terminal catalytic domain
gene-LOC110697787	0.17	0.03	0.33	0.01	0	0	13	2	25	1	0	0	0.033	-4.934	0.00360014	0.0289436	down	NW_018744501.1	229413	234294	-	LOC110697787	--	--	--	--	--	--	--	--
gene-LOC110697797	39.83	7.38	147.05	20.8	5.53	3.44	593	108	2154	294	88	47	0.182	-2.458	0.00379211	0.0300425	down	NW_018744501.1	604351	605610	-	LOC110697797	--	K11251 histone H2A | (RefSeq) histone H2A, sperm-like (A)	histone H2A, sperm-like [Chenopodium quinoa]	RecName: Full=Histone H2AX;	RecName: Full=Histone H2A {ECO:0000256|RuleBase:RU003767};	Histone 2A	GO:0000786,nucleosome; GO:0005634,nucleus; GO:0003677,DNA binding; GO:0046982,protein heterodimerization activity	C-terminus of histone H2A
gene-LOC110697809	4.31	3.77	11.83	3.49	2.17	1.48	156	134	421	120	84	49	0.412	-1.278	0.00489961	0.0360986	down	NW_018744501.1	946580	957489	-	LOC110697809	--	K13207 CUG-BP- and ETR3-like factor | (RefSeq) RNA-binding protein BRN1-like (A)	RNA-binding protein BRN1-like [Chenopodium quinoa]	RecName: Full=RNA-binding protein BRN1 {ECO:0000305}; AltName: Full=Protein BRUNO-LIKE 1 {ECO:0000303|PubMed:23437850}; Short=AtBRN1 {ECO:0000303|PubMed:23437850}; AltName: Full=Protein RNA-BINDING PROTEIN-DEFENSE RELATED 1 {ECO:0000303|PubMed:20636102}; Short=AtRBP-DR1 {ECO:0000303|PubMed:20636102};	SubName: Full=Uncharacterized protein {ECO:0000313|EMBL:KNA13672.1};	RNA-binding protein CUGBP1/BRUNO (RRM superfamily)	GO:0005737,cytoplasm; GO:0030529,NA; GO:0003729,mRNA binding; GO:0009908,flower development; GO:0006402,mRNA catabolic process; GO:0009626,plant-type hypersensitive response; GO:0080151,positive regulation of salicylic acid mediated signaling pathway; GO:2000028,regulation of photoperiodism, flowering	RNA recognition motif. (a.k.a. RRM, RBD, or RNP domain)
gene-LOC110697832	21.21	14.95	19.86	13.08	4.34	5.65	393	272	362	230	86	96	0.434	-1.203	0.00352381	0.0284996	down	NW_018744501.1	1512756	1513682	+	LOC110697832	--	--	rRNA-processing protein CGR1-like [Chenopodium quinoa]	--	SubName: Full=Uncharacterized protein {ECO:0000313|EMBL:KNA18504.1};	--	--	Cgr1 family
gene-LOC110697848	0.22	0.11	0.92	0	0	0	6	3	25	0	0	0	0.02	-5.631	0.00202718	0.018983	down	NW_018744501.1	1953504	1954974	-	LOC110697848	--	--	uncharacterized protein LOC110697848 [Chenopodium quinoa]	--	SubName: Full=Uncharacterized protein {ECO:0000313|EMBL:KMS99394.1};	--	--	Plant mobile domain
gene-LOC110697931	0.19	0.28	1.03	0	0	0	5	7	26	0	0	0	0.018	-5.833	0.000660216	0.00795283	down	NW_018744501.1	1954713	1956982	-	LOC110697931	--	K14400 pre-mRNA cleavage complex 2 protein Pcf11 | (RefSeq) LOW QUALITY PROTEIN: uncharacterized protein LOC111982967 (A)	protein MAIN-LIKE 1-like [Chenopodium quinoa]	RecName: Full=Protein MAIN-LIKE 1 {ECO:0000303|PubMed:24635680};	SubName: Full=serine/threonine-protein phosphatase 7 long form homolog {ECO:0000313|RefSeq:XP_018818810.1, ECO:0000313|RefSeq:XP_018818811.1};	--	GO:0005634,nucleus; GO:0008483,transaminase activity; GO:0016458,gene silencing; GO:0010073,meristem maintenance; GO:0010082,regulation of root meristem growth	Plant mobile domain
gene-LOC110697940	9.33	12.64	10.51	3.1	3.48	4.03	386	514	428	122	154	153	0.352	-1.508	7.49185e-06	0.000176562	down	NW_018744502.1	29005	34843	+	LOC110697940	--	--	--	--	--	--	--	--
gene-LOC110697941	0.55	0.9	0.68	0	0.09	0	18	29	22	0	3	0	0.046	-4.43	0.000207784	0.00311334	down	NW_018744502.1	39121	72221	-	LOC110697941	--	K01757 strictosidine synthase [EC:4.3.3.2] | (RefSeq) protein STRICTOSIDINE SYNTHASE-LIKE 12-like (A)	protein STRICTOSIDINE SYNTHASE-LIKE 7-like [Chenopodium quinoa]	RecName: Full=Protein STRICTOSIDINE SYNTHASE-LIKE 7 {ECO:0000303|PubMed:10777701}; Short=AtSSL7 {ECO:0000303|PubMed:10777701}; Flags: Precursor;	SubName: Full=Uncharacterized protein {ECO:0000313|EMBL:KNA11958.1};	Predicted alkaloid synthase/Surface mucin Hemomucin	GO:0005783,endoplasmic reticulum; GO:0016020,membrane; GO:0005773,vacuole; GO:0016788,hydrolase activity, acting on ester bonds; GO:0009058,biosynthetic process; GO:0009723,response to ethylene; GO:0009620,response to fungus; GO:0009753,response to jasmonic acid; GO:0009751,response to salicylic acid; GO:0009615,response to virus; GO:0009611,response to wounding	Strictosidine synthase
gene-LOC110697956	0.63	0.11	0.64	0	0	0.03	24	4	24	0	0	1	0.024	-5.373	0.00062017	0.00755572	down	NW_018744502.1	985559	989128	-	LOC110697956	--	--	--	--	--	--	--	--
gene-LOC110697983	2.37	2.22	3.25	0.87	0.39	0.57	63	58	85	22	11	14	0.254	-1.979	4.36172e-06	0.000108719	down	NW_018744502.1	2174176	2175909	+	LOC110697983	--	--	--	--	--	--	--	--
gene-LOC110697992	2.01	1.09	2.16	1.05	0.42	0.35	165	88	174	82	37	26	0.374	-1.42	0.00240124	0.0214942	down	NW_018744502.1	2759839	2765945	-	LOC110697992	--	K03029 26S proteasome regulatory subunit N10 | (RefSeq) 26S proteasome non-ATPase regulatory subunit 4 homolog (A)	uncharacterized protein LOC110697992 [Chenopodium quinoa]	RecName: Full=Nitrate regulatory gene2 protein {ECO:0000303|PubMed:26744214}; Short=NRG2 protein {ECO:0000303|PubMed:26744214};	SubName: Full=Uncharacterized protein {ECO:0000313|EMBL:KNA13193.1};	--	GO:0005634,nucleus; GO:0071249,cellular response to nitrate; GO:0015706,nitrate transport; GO:0071705,nitrogen compound transport; GO:0006355,regulation of transcription, DNA-templated; GO:0010167,response to nitrate; GO:1901698,response to nitrogen compound; GO:0006351,transcription, DNA-templated	Protein of unknown function (DUF632)
gene-LOC110698049	0.59	0.8	1.05	0.05	0.05	0	12	16	21	1	1	0	0.045	-4.474	0.000487729	0.00622008	down	NW_018744502.1	5744925	5747670	-	LOC110698049	--	--	--	--	--	--	--	--
gene-LOC110698050	55.05	78.25	23.17	4.85	2.63	3.4	1077	1504	446	90	55	61	0.069	-3.858	2.38333e-12	1.99612e-10	down	NW_018744502.1	5749696	5752758	-	LOC110698050	--	--	--	--	--	--	--	--
gene-LOC110698061	2.18	1.61	3	0.69	0.02	0.08	113	82	153	34	1	4	0.121	-3.052	0.000779059	0.00904881	down	NW_018744502.1	6008636	6018985	+	LOC110698061	--	K19986 exocyst complex component 8 | (RefSeq) exocyst complex component EXO84A-like (A)	exocyst complex component EXO84A-like [Chenopodium quinoa]	RecName: Full=Exocyst complex component EXO84A; Short=AtExo80a;	SubName: Full=Uncharacterized protein {ECO:0000313|EMBL:KNA10092.1};	Exocyst complex subunit	GO:0000145,exocyst; GO:0001927,exocyst assembly; GO:0051601,exocyst localization	Exocyst component 84 C-terminal
gene-LOC110698123	45.22	33.36	85.63	28.45	17.34	22.76	817	592	1522	488	335	377	0.474	-1.076	0.000349251	0.00476824	down	NW_018744502.1	7436441	7438661	-	LOC110698123	--	--	CASP-like protein 1E1 [Chenopodium quinoa]	RecName: Full=CASP-like protein 1E1; Short=VvCASPL1E1;	RecName: Full=CASP-like protein {ECO:0000256|RuleBase:RU361233};	--	GO:0016021,integral component of membrane; GO:0005886,plasma membrane; GO:0051536,iron-sulfur cluster binding	Domain of unknown function (DUF588)
gene-LOC110698351	13.35	2.26	45.29	6.25	1.29	1.16	650	108	2170	289	67	52	0.168	-2.57	0.00259298	0.0227955	down	NW_018744517.1	41266	44233	+	LOC110698351	--	K11252 histone H2B | (RefSeq) probable histone H2B.1 (A)	PREDICTED: probable histone H2B.1 isoform X1 [Beta vulgaris subsp. vulgaris]	RecName: Full=Probable histone H2B.1;	RecName: Full=Histone H2B {ECO:0000256|RuleBase:RU000451};	Histone H2B	GO:0000786,nucleosome; GO:0005634,nucleus; GO:0003677,DNA binding; GO:0046982,protein heterodimerization activity	Core histone H2A/H2B/H3/H4
gene-LOC110698352	3.48	2.18	5.8	2.34	1.29	1.28	119	73	195	76	47	40	0.481	-1.056	0.00695756	0.0465007	down	NW_018742381.1	1763753	1768467	-	LOC110698352	--	K03111 single-strand DNA-binding protein | (RefSeq) single-stranded DNA-binding protein, mitochondrial-like (A)	single-stranded DNA-binding protein, mitochondrial-like [Chenopodium quinoa]	RecName: Full=Single-stranded DNA-binding protein, mitochondrial; Flags: Precursor;	SubName: Full=Uncharacterized protein {ECO:0000313|EMBL:KNA05586.1};	Single-stranded DNA-binding protein	GO:0005739,mitochondrion; GO:0003697,single-stranded DNA binding	Single-strand binding protein family
gene-LOC110698379	1.87	0.85	3.38	0	0	0	18	8	32	0	0	0	0.011	-6.477	1.87314e-05	0.000399597	down	NW_018744517.1	1559848	1560413	-	LOC110698379	--	--	--	--	--	--	--	--
gene-LOC110698421	0.56	0.29	0.67	0.1	0.06	0.07	18	9	21	3	2	2	0.165	-2.598	0.00337669	0.0276305	down	NW_018744535.1	18714	21047	-	LOC110698421	--	--	uncharacterized protein LOC110698421 [Chenopodium quinoa]	--	SubName: Full=Uncharacterized protein {ECO:0000313|EMBL:KNA16882.1};	--	GO:0016021,integral component of membrane	Protein of unknown function (DUF3537)
gene-LOC110698443	395.23	330.94	424.5	277.43	101.51	106.91	5355	4405	5659	3569	1471	1328	0.445	-1.168	0.0020843	0.019377	down	NW_018744537.1	270431	272495	-	LOC110698443	--	K02975 small subunit ribosomal protein S25e | (RefSeq) 40S ribosomal protein S25 (A)	40S ribosomal protein S25 [Chenopodium quinoa]	RecName: Full=40S ribosomal protein S25;	SubName: Full=Uncharacterized protein {ECO:0000313|EMBL:KNA03267.1};	40S ribosomal protein S25	GO:0005840,ribosome	S25 ribosomal protein
gene-LOC110698449	3.06	1.96	4.68	1.72	1.12	1.39	168	106	253	90	66	70	0.491	-1.025	0.00129472	0.0134699	down	NW_018744537.1	315006	324147	-	LOC110698449	--	K14767 U3 small nucleolar RNA-associated protein 3 | (RefSeq) something about silencing protein 10-like isoform X1 (A)	something about silencing protein 10-like isoform X1 [Chenopodium quinoa]	--	SubName: Full=Uncharacterized protein {ECO:0000313|EMBL:KNA04336.1};	Disrupter of silencing SAS10	--	Sas10 C-terminal domain
gene-LOC110698468	3.26	2.83	3.05	0.84	0.73	0.75	189	161	174	46	45	40	0.274	-1.87	1.01796e-09	5.28859e-08	down	NW_018742381.1	2217886	2227133	-	LOC110698468	--	--	uncharacterized protein LOC110698468 [Chenopodium quinoa]	--	SubName: Full=Uncharacterized protein {ECO:0000313|EMBL:KNA10551.1};	--	--	Shugoshin N-terminal coiled-coil region
gene-LOC110698477	1.23	0.81	2.57	0	0	0	17	11	35	0	0	0	0.01	-6.604	7.00288e-06	0.000165981	down	NW_018742204.1	22891595	22892882	-	LOC110698477	--	--	--	--	--	--	--	--
gene-LOC110698572	2.47	1.92	2.48	1.07	1.04	0.63	102	78	101	42	46	24	0.436	-1.196	0.00101221	0.0111141	down	NW_018744537.1	1588894	1593680	+	LOC110698572	--	K05864 peptidyl-prolyl isomerase D [EC:5.2.1.8] | (RefSeq) peptidyl-prolyl cis-trans isomerase CYP40-like (A)	peptidyl-prolyl cis-trans isomerase CYP40-like [Chenopodium quinoa]	RecName: Full=Peptidyl-prolyl cis-trans isomerase CYP40; Short=PPIase CYP40; EC=5.2.1.8; AltName: Full=Cyclophilin of 40 kDa; Short=Cyclophilin-40; AltName: Full=Protein SQUINT; AltName: Full=Rotamase CYP40;	SubName: Full=Uncharacterized protein {ECO:0000313|EMBL:KNA05029.1};	HSP90 co-chaperone CPR7/Cyclophilin	GO:0005737,cytoplasm; GO:0005829,cytosol; GO:0003755,peptidyl-prolyl cis-trans isomerase activity; GO:0010582,floral meristem determinacy; GO:0006457,protein folding; GO:0010050,vegetative phase change	Cyclophilin type peptidyl-prolyl cis-trans isomerase/CLD
gene-LOC110698586	1.56	0.57	5.69	0.32	0.12	0	36	13	129	7	3	0	0.067	-3.896	0.000188003	0.00286289	down	NW_018744537.1	1676899	1679822	+	LOC110698586	--	K10405 kinesin family member C1 | (RefSeq) kinesin-like protein KIN-14N (A)	B3 domain-containing protein At3g19184-like [Chenopodium quinoa]	RecName: Full=B3 domain-containing protein At3g19184;	SubName: Full=Uncharacterized protein {ECO:0000313|EMBL:KNA21719.1};	--	GO:0005634,nucleus; GO:0003677,DNA binding; GO:0006355,regulation of transcription, DNA-templated; GO:0006351,transcription, DNA-templated	B3 DNA binding domain
gene-LOC110698598	17.84	18.23	15.24	3.33	3.25	3.21	807	810	678	143	157	133	0.203	-2.298	1.26973e-14	1.57423e-12	down	NW_018744537.1	1813180	1818804	+	LOC110698598	--	--	--	--	--	--	--	--
gene-LOC110698606	34.5	49.17	43.96	16	19.63	18.28	595	833	746	262	362	289	0.457	-1.13	0.000349795	0.00477062	down	NW_018744537.1	1932470	1933642	+	LOC110698606	--	K01426 amidase [EC:3.5.1.4] | (RefSeq) LOW QUALITY PROTEIN: uncharacterized protein LOC105643773 (A)	lamin-like protein [Chenopodium quinoa]	RecName: Full=Lamin-like protein; Flags: Precursor;	SubName: Full=Uncharacterized protein {ECO:0000313|EMBL:KNA05280.1};	--	GO:0031225,anchored component of membrane; GO:0046658,anchored component of plasma membrane; GO:0005886,plasma membrane; GO:0005773,vacuole; GO:0009055,electron transfer activity	Plastocyanin-like domain
gene-LOC110698618	12.83	4.22	25.63	6.15	1.37	1.26	288	93	566	131	33	26	0.232	-2.108	0.00228574	0.0207144	down	NW_018744537.1	2149424	2152135	+	LOC110698618	--	--	phosphopantothenoylcysteine decarboxylase subunit VHS3-like [Chenopodium quinoa]	--	SubName: Full=Uncharacterized protein {ECO:0000313|EMBL:KNA17662.1};	--	--	--
gene-LOC110698662	15.64	13.66	31.63	9.7	8.4	8.46	409	351	814	241	235	203	0.498	-1.006	0.000283374	0.00400953	down	NW_018742381.1	2475019	2477948	+	LOC110698662	--	K14399 polyribonucleotide 5'-hydroxyl-kinase [EC:2.7.1.78] | (RefSeq) Clp1-domain-containing protein (A)	random slug protein 5-like [Chenopodium quinoa]	RecName: Full=Phosphatidylinositol/phosphatidylcholine transfer protein SFH1; AltName: Full=Phosphatidylinositol transfer protein 1; Short=AtPITP1; AltName: Full=Protein CAN OF WORMS1; AltName: Full=Protein SEC FOURTEEN HOMOLOGS 1; Short=AtSFH1; AltName: Full=Protein SHORT ROOT HAIR 1;	SubName: Full=Uncharacterized protein {ECO:0000313|EMBL:KNA21569.1};	Phosphatidylinositol transfer protein PDR16 and related proteins	GO:0000139,Golgi membrane; GO:0005886,plasma membrane; GO:0035619,root hair tip; GO:0009932,cell tip growth; GO:0015031,protein transport; GO:0010053,root epidermal cell differentiation; GO:0048768,root hair cell tip growth; GO:0048767,root hair elongation	CRAL/TRIO domain
gene-LOC110698666	0.07	0.19	0.3	0.02	0	0	4	10	16	1	0	0	0.041	-4.614	0.00459976	0.0344742	down	NW_018744537.1	2954958	2957696	+	LOC110698666	--	K19765 heat shock factor-binding protein 1 | (RefSeq) pentatricopeptide repeat-containing protein At1g52640, mitochondrial (A)	pentatricopeptide repeat-containing protein At1g52640, mitochondrial [Chenopodium quinoa]	RecName: Full=Pentatricopeptide repeat-containing protein At1g52640, mitochondrial; Flags: Precursor;	SubName: Full=Uncharacterized protein {ECO:0000313|EMBL:KNA06895.1};	FOG: PPR repeat	GO:0043231,intracellular membrane-bounded organelle; GO:0005739,mitochondrion; GO:0004519,endonuclease activity; GO:0003723,RNA binding; GO:0009451,RNA modification	PPR repeat family
gene-LOC110698727	22.78	23.42	26.67	12.39	6.96	9.43	606	612	698	313	198	230	0.424	-1.239	1.59517e-06	4.47007e-05	down	NW_018744537.1	3863115	3864566	+	LOC110698727	--	--	protein CDI-like [Chenopodium quinoa]	RecName: Full=Protein CDI {ECO:0000305}; AltName: Full=Protein CADMIUM INDUCED {ECO:0000303|PubMed:22569258};	SubName: Full=Uncharacterized protein {ECO:0000313|EMBL:KNA02884.1}; Flags: Fragment;	--	GO:0005829,cytosol; GO:0016740,transferase activity; GO:0009846,pollen germination; GO:0009860,pollen tube growth; GO:0007338,single fertilization	--
gene-LOC110698733	0.36	0.65	0.32	0.06	0	0.09	25	44	22	4	0	6	0.118	-3.089	0.00143882	0.0146406	down	NW_018744537.1	3959164	3962805	-	LOC110698733	--	K13428 LRR receptor-like serine/threonine-protein kinase EFR [EC:2.7.11.1] | (RefSeq) EFR; EF-TU receptor (A)	putative receptor-like protein kinase At3g47110 [Chenopodium quinoa]	RecName: Full=Probable LRR receptor-like serine/threonine-protein kinase At3g47570; EC=2.7.11.1; Flags: Precursor;	SubName: Full=Uncharacterized protein {ECO:0000313|EMBL:KMS99691.1};	--	GO:0016021,integral component of membrane; GO:0005886,plasma membrane; GO:0005524,ATP binding; GO:0004674,protein serine/threonine kinase activity	Protein kinase domain
gene-LOC110698762	79.29	66.28	79.53	47.31	20.2	23.16	1068	877	1054	605	291	286	0.426	-1.23	0.000218258	0.00324813	down	NW_018744537.1	4487562	4488992	+	LOC110698762	--	K02922 large subunit ribosomal protein L37e | (RefSeq) 60S ribosomal protein L37-3 (A)	60S ribosomal protein L37-3 [Chenopodium quinoa]	RecName: Full=60S ribosomal protein L37-3;	RecName: Full=Ribosomal protein L37 {ECO:0000256|RuleBase:RU000576};	60S ribosomal protein L37	GO:0022625,cytosolic large ribosomal subunit; GO:0046872,metal ion binding; GO:0003723,RNA binding; GO:0019843,rRNA binding; GO:0003735,structural constituent of ribosome; GO:0006412,translation	Ribosomal protein L37e
gene-LOC110698811	3.54	4.36	9.51	0.23	0.53	0.29	81	98	214	5	13	6	0.071	-3.823	6.50556e-12	4.98991e-10	down	NW_018744537.1	5167907	5170830	-	LOC110698811	--	--	probable inactive nicotinamidase At3g16190 [Chenopodium quinoa]	RecName: Full=Probable inactive nicotinamidase At3g16190 {ECO:0000305};	SubName: Full=Uncharacterized protein {ECO:0000313|EMBL:KNA22449.1};	--	GO:0005737,cytoplasm; GO:0003824,catalytic activity; GO:0006212,uracil catabolic process	Isochorismatase family
gene-LOC110698818	1.27	0.91	1.86	0.21	0.2	0.08	101	71	145	16	17	6	0.138	-2.856	4.19583e-10	2.33578e-08	down	NW_018744537.1	5239978	5246579	+	LOC110698818	--	K20823 N-alpha-acetyltransferase 35, NatC auxiliary subunit | (RefSeq) N-alpha-acetyltransferase 35, NatC auxiliary subunit-like isoform X1 (A)	uncharacterized protein LOC110698818 [Chenopodium quinoa]	--	SubName: Full=Uncharacterized protein {ECO:0000313|EMBL:KNA16746.1};	--	--	--
gene-LOC110698887	1.45	0.25	6.22	0.24	0	0	58	10	245	9	0	0	0.035	-4.856	0.000326025	0.0045015	down	NW_018744537.1	2548959	2550962	-	LOC110698887	--	K20718 LRR receptor-like serine/threonine-protein kinase ERECTA [EC:2.7.11.1] | (RefSeq) LRR receptor-like serine/threonine-protein kinase ERECTA (A)	protein TOO MANY MOUTHS-like [Chenopodium quinoa]	RecName: Full=Protein TOO MANY MOUTHS {ECO:0000303|PubMed:11536724}; AltName: Full=Receptor-like protein 17 {ECO:0000303|PubMed:18434605}; Short=AtRLP17 {ECO:0000303|PubMed:18434605}; Flags: Precursor;	SubName: Full=Uncharacterized protein {ECO:0000313|EMBL:KNA12222.1};	FOG: Leucine rich repeat	GO:0031225,anchored component of membrane; GO:0016021,integral component of membrane; GO:0016020,membrane; GO:0005886,plasma membrane; GO:0042277,peptide binding; GO:0004872,NA; GO:0008356,asymmetric cell division; GO:0009737,response to abscisic acid	Leucine rich repeat
gene-LOC110698974	8.12	6.97	11.15	3.08	3.96	3.36	211	178	285	76	110	80	0.444	-1.171	2.29087e-05	0.000475478	down	NW_018742385.1	490559	493455	+	LOC110698974	--	--	--	--	--	--	--	--
gene-LOC110699022	2.68	0.47	9.92	1.32	0.56	0.34	122	21	444	57	27	14	0.205	-2.289	0.00708087	0.0471057	down	NW_018744560.1	409124	413055	+	LOC110699022	--	K21777 G2/mitotic-specific cyclin-B, other | (RefSeq) G2/mitotic-specific cyclin-2-like (A)	G2/mitotic-specific cyclin-2-like [Chenopodium quinoa]	RecName: Full=Cyclin-B2-3; AltName: Full=G2/mitotic-specific cyclin-B2-3; Short=CycB2;3;	SubName: Full=Uncharacterized protein {ECO:0000313|EMBL:KNA13359.1}; Flags: Fragment;	Cyclin B and related kinase-activating proteins	GO:0005634,nucleus; GO:0007049,cell cycle; GO:0051301,cell division	Cyclin, N-terminal domain
gene-LOC110699025	3.01	0.93	7.74	1.31	0.72	0.48	102	31	258	42	26	15	0.254	-1.976	0.00321258	0.0267249	down	NW_018744560.1	454566	457124	+	LOC110699025	--	--	uncharacterized protein LOC110699025 isoform X1 [Chenopodium quinoa]	--	SubName: Full=Uncharacterized protein {ECO:0000313|EMBL:KNA06125.1};	--	--	--
gene-LOC110699039	14.48	11.72	22.32	10.91	5.97	4.07	830	660	1259	594	366	214	0.474	-1.078	0.00230209	0.0207912	down	NW_018744560.1	657432	668270	+	LOC110699039	--	K14799 pre-rRNA-processing protein TSR1 | (RefSeq) pre-rRNA-processing protein TSR1 homolog (A)	pre-rRNA-processing protein TSR1 homolog [Chenopodium quinoa]	--	SubName: Full=Uncharacterized protein {ECO:0000313|EMBL:KNA18272.1};	Uncharacterized conserved protein	GO:0005634,nucleus; GO:0042254,ribosome biogenesis	40S ribosome biogenesis protein Tsr1 and BMS1 C-terminal
gene-LOC110699044	14.55	19.63	9.01	3.84	4.43	3.59	614	814	374	154	200	139	0.284	-1.814	5.15929e-05	0.000966016	down	NW_018744560.1	749135	756187	-	LOC110699044	--	K12890 splicing factor, arginine/serine-rich 1 | (RefSeq) uncharacterized protein LOC103422586 isoform X1 (A)	uncharacterized protein LOC110699044 [Chenopodium quinoa]	--	SubName: Full=Uncharacterized protein {ECO:0000313|EMBL:KNA19776.1};	--	--	--
gene-LOC110699053	320.94	226.26	335.6	229.29	90.29	86.42	6311	4371	6493	4281	1899	1558	0.489	-1.032	0.00596075	0.0415097	down	NW_018744560.1	1163398	1166283	+	LOC110699053	--	K02866 large subunit ribosomal protein L10e | (RefSeq) 60S ribosomal protein L10-like (A)	60S ribosomal protein L10-like [Chenopodium quinoa]	RecName: Full=60S ribosomal protein L10; AltName: Full=QM protein homolog;	SubName: Full=Uncharacterized protein {ECO:0000313|EMBL:KNA15700.1};	60s ribosomal protein L10	GO:0005840,ribosome; GO:0003735,structural constituent of ribosome; GO:0006412,translation	Ribosomal protein L16p/L10e
gene-LOC110699168	5.15	3.6	7.93	1.33	2.17	3.02	302	207	457	74	136	162	0.452	-1.146	0.00551228	0.03925	down	NW_018744582.1	442062	450852	-	LOC110699168	--	K13430 serine/threonine-protein kinase PBS1 [EC:2.7.11.1] | (RefSeq) serine/threonine-protein kinase PBS1-like (A)	receptor-like serine/threonine-protein kinase NCRK [Chenopodium quinoa]	RecName: Full=Receptor-like serine/threonine-protein kinase NCRK; EC=2.7.11.1; Flags: Precursor;	SubName: Full=Uncharacterized protein {ECO:0000313|EMBL:KNA08017.1};	Serine/threonine protein kinase	GO:0012505,endomembrane system; GO:0005768,endosome; GO:0010008,endosome membrane; GO:0016021,integral component of membrane; GO:0031902,late endosome membrane; GO:0005886,plasma membrane; GO:0005524,ATP binding; GO:0051020,GTPase binding; GO:0004675,transmembrane receptor protein serine/threonine kinase activity; GO:0007166,cell surface receptor signaling pathway; GO:0006468,protein phosphorylat…	Protein kinase domain
gene-LOC110699195	5.05	4.19	17.15	3.63	1.5	1.34	173	141	578	118	55	42	0.284	-1.818	0.000846836	0.00968545	down	NW_018744582.1	898381	901170	+	LOC110699195	--	K13493 cytokinin-N-glucosyltransferase [EC:2.4.1.-] | (RefSeq) UDP-glycosyltransferase 76C2-like (A)	UDP-glycosyltransferase 76B1-like [Chenopodium quinoa]	RecName: Full=UDP-glycosyltransferase 76B1 {ECO:0000305}; EC=2.4.1.- {ECO:0000305};	RecName: Full=Glycosyltransferase {ECO:0000256|RuleBase:RU362057}; EC=2.4.1.- {ECO:0000256|RuleBase:RU362057};	UDP-glucuronosyl and UDP-glucosyl transferase	GO:0043231,intracellular membrane-bounded organelle; GO:0046527,glucosyltransferase activity; GO:0080043,quercetin 3-O-glucosyltransferase activity; GO:0080044,quercetin 7-O-glucosyltransferase activity; GO:0052640,salicylic acid glucosyltransferase (glucoside-forming) activity; GO:0006952,defense response; GO:0010150,leaf senescence; GO:0008152,metabolic process; GO:0002239,response to oomycetes	UDP-glucoronosyl and UDP-glucosyl transferase
gene-LOC110699206	9.75	2.75	6.83	0.35	0.52	0	177	49	122	6	10	0	0.05	-4.311	9.95862e-08	3.61862e-06	down	NW_018744582.1	953119	954026	+	LOC110699206	--	--	--	--	--	--	--	--
gene-LOC110699253	297.82	222.92	395.23	213.21	81.92	70.32	8505	6254	11105	5781	2502	1841	0.429	-1.22	0.00214633	0.0198058	down	NW_018744582.1	1498170	1500897	-	LOC110699253	--	K02941 large subunit ribosomal protein LP0 | (RefSeq) 60S acidic ribosomal protein P0-like (A)	60S acidic ribosomal protein P0-like [Chenopodium quinoa]	RecName: Full=60S acidic ribosomal protein P0;	RecName: Full=60S acidic ribosomal protein P0 {ECO:0000256|PIRNR:PIRNR039087};	60S acidic ribosomal protein P0	GO:0005840,ribosome; GO:0042254,ribosome biogenesis	60s Acidic ribosomal protein
gene-LOC110699316	0.6	0.18	1.52	0.06	0.16	0	34	10	85	3	10	0	0.12	-3.056	0.0049449	0.0363336	down	NW_018744582.1	2315463	2320420	+	LOC110699316	--	K02178 checkpoint serine/threonine-protein kinase [EC:2.7.11.1] | (RefSeq) uncharacterized protein LOC112273310 (A)	probable inactive serine/threonine-protein kinase bub1 [Chenopodium quinoa]	RecName: Full=Mitotic spindle checkpoint protein BUBR1; AltName: Full=BUB1-related protein 1;	SubName: Full=Uncharacterized protein {ECO:0000313|EMBL:KMS99343.1};	Mitotic checkpoint serine/threonine protein kinase	GO:0010369,chromocenter; GO:0000778,condensed nuclear chromosome kinetochore; GO:0005737,cytoplasm; GO:0000776,kinetochore; GO:0005828,kinetochore microtubule; GO:0005815,microtubule organizing center; GO:0005876,spindle microtubule; GO:0004672,protein kinase activity; GO:0051754,meiotic sister chromatid cohesion, centromeric; GO:0007094,mitotic spindle assembly checkpoint	Mad3/BUB1 homology region 1
gene-LOC110699321	2.53	2.22	2.55	1.29	0.55	0.92	147	127	146	71	34	49	0.401	-1.317	0.000353874	0.00481377	down	NW_018744582.1	2351972	2358259	-	LOC110699321	--	K16302 metal transporter CNNM | (RefSeq) probable methyltransferase PMT28 (A)	probable methyltransferase PMT23 [Chenopodium quinoa]	RecName: Full=Probable methyltransferase PMT23; EC=2.1.1.-;	SubName: Full=Uncharacterized protein {ECO:0000313|EMBL:KMS99332.1};	--	GO:0005737,cytoplasm; GO:0005768,endosome; GO:0005794,Golgi apparatus; GO:0000139,Golgi membrane; GO:0016021,integral component of membrane; GO:0005802,trans-Golgi network; GO:0008757,S-adenosylmethionine-dependent methyltransferase activity; GO:0032259,methylation	Putative S-adenosyl-L-methionine-dependent methyltransferase
gene-LOC110699351	45.26	45.56	60.85	27	18.85	17.23	1183	1170	1565	670	527	413	0.452	-1.145	4.29516e-08	1.66606e-06	down	NW_018744582.1	2629874	2635625	+	LOC110699351	--	--	uncharacterized protein LOC110699351 [Chenopodium quinoa]	--	SubName: Full=Uncharacterized protein {ECO:0000313|EMBL:KNA11168.1};	--	--	Biotin-requiring enzyme
gene-LOC110699385	0.22	0.1	2.74	0	0	0	7	3	84	0	0	0	0.008	-7.018	0.00012606	0.00204732	down	NW_018744582.1	2994831	2997373	+	LOC110699385	--	K23810 (E)-8-carboxylinalool synthase [EC:1.14.14.-] | (RefSeq) geraniol 8-hydroxylase (A)	cytochrome P450 76AD1-like [Chenopodium quinoa]	RecName: Full=Cytochrome P450 76AD1 {ECO:0000303|PubMed:22660548}; EC=1.14.-.- {ECO:0000305};	SubName: Full=CYP76AD1 {ECO:0000313|EMBL:AQS22859.1};	Cytochrome P450 CYP2 subfamily	GO:0016021,integral component of membrane; GO:0020037,heme binding; GO:0005506,iron ion binding; GO:0004497,monooxygenase activity; GO:0016705,oxidoreductase activity, acting on paired donors, with incorporation or reduction of molecular oxygen	Cytochrome P450
gene-LOC110699489	0.53	0.09	0.66	0	0	0	18	3	22	0	0	0	0.015	-6.042	0.00038081	0.00507665	down	NW_018744583.1	527398	532098	+	LOC110699489	--	K23200 putative arabinosyltransferase [EC:2.4.2.-] | (RefSeq) probable arabinosyltransferase ARAD1 isoform X1 (A)	probable arabinosyltransferase ARAD1 isoform X1 [Chenopodium quinoa]	RecName: Full=Probable arabinosyltransferase ARAD1; EC=2.4.2.-; AltName: Full=Arabinan alpha-1,5-arabinosyltransferase; AltName: Full=L-Arabinosyltransferase; AltName: Full=Protein ARABINAN DEFICIENT 1;	SubName: Full=probable arabinosyltransferase ARAD1 {ECO:0000313|RefSeq:XP_009803101.1};	Acetylglucosaminyltransferase EXT1/exostosin 1	GO:0005768,endosome; GO:0005794,Golgi apparatus; GO:0000139,Golgi membrane; GO:0016021,integral component of membrane; GO:0005802,trans-Golgi network; GO:0016757,transferase activity, transferring glycosyl groups; GO:0071555,cell wall organization; GO:0045489,pectin biosynthetic process; GO:0006486,protein glycosylation	Exostosin family
gene-LOC110699517	0.43	0.23	1.17	0	0	0	19	10	51	0	0	0	0.008	-6.908	3.89251e-06	9.87778e-05	down	NW_018744589.1	262780	265544	+	LOC110699517	--	--	--	--	--	--	--	--
gene-LOC110699523	8.89	6.6	12.73	5.45	3.4	2.98	455	332	641	265	186	140	0.464	-1.109	5.86939e-05	0.0010779	down	NW_018744589.1	416987	419634	-	LOC110699523	--	K18213 proteinaceous RNase P [EC:3.1.26.5] | (RefSeq) proteinaceous RNase P 1, chloroplastic/mitochondrial-like (A)	proteinaceous RNase P 1, chloroplastic/mitochondrial-like [Chenopodium quinoa]	RecName: Full=Proteinaceous RNase P 1, chloroplastic/mitochondrial; EC=3.1.26.5 {ECO:0000269|PubMed:20473316, ECO:0000269|PubMed:22549728, ECO:0000269|PubMed:22991464}; AltName: Full=Pentatricopeptide repeat-containing protein At2g32230; Flags: Precursor;	SubName: Full=Uncharacterized protein {ECO:0000313|EMBL:KNA02674.1};	Uncharacterized membrane protein, predicted efflux pump	GO:0009507,chloroplast; GO:0005739,mitochondrion; GO:0046872,metal ion binding; GO:0004526,ribonuclease P activity; GO:0001682,tRNA 5'-leader removal; GO:0008033,tRNA processing	Pentacotripeptide-repeat region of PRORP
gene-LOC110699579	274.79	198.14	285.18	184.43	59.69	54.39	4739	3357	4839	3020	1101	860	0.414	-1.271	0.00404626	0.0315409	down	NW_018744593.1	537590	540014	-	LOC110699579	--	K02903 large subunit ribosomal protein L28e | (RefSeq) 60S ribosomal protein L28-1-like (A)	60S ribosomal protein L28-1-like [Chenopodium quinoa]	RecName: Full=60S ribosomal protein L28-1;	SubName: Full=Uncharacterized protein {ECO:0000313|EMBL:KNA19028.1};	60S ribosomal protein L28	GO:0005618,cell wall; GO:0009507,chloroplast; GO:0022625,cytosolic large ribosomal subunit; GO:0022626,cytosolic ribosome; GO:0005886,plasma membrane; GO:0009506,plasmodesma; GO:0003735,structural constituent of ribosome; GO:0009735,response to cytokinin; GO:0006412,translation	Ribosomal L28e protein family
gene-LOC110699593	0.22	0.17	0.6	0.02	0.03	0	15	11	40	1	2	0	0.053	-4.232	0.000288846	0.0040746	down	NW_018744593.1	1077118	1080492	-	LOC110699593	--	K14496 abscisic acid receptor PYR/PYL family | (RefSeq) abscisic acid receptor PYL2-like (A)	abscisic acid receptor PYL2-like [Chenopodium quinoa]	RecName: Full=Abscisic acid receptor PYL2; AltName: Full=PYR1-like protein 2; AltName: Full=Regulatory components of ABA receptor 14;	SubName: Full=Abscisic acid receptor PYL3 {ECO:0000313|EMBL:ARB50441.1};	--	GO:0005737,cytoplasm; GO:0005634,nucleus; GO:0005886,plasma membrane; GO:0010427,abscisic acid binding; GO:0042802,identical protein binding; GO:0042803,protein homodimerization activity; GO:0004864,protein phosphatase inhibitor activity; GO:0004872,NA; GO:0009738,abscisic acid-activated signaling pathway	Polyketide cyclase / dehydrase and lipid transport
gene-LOC110699597	1.69	1.11	4.64	1.04	0.16	0.42	48	31	130	28	5	11	0.247	-2.017	0.00513907	0.0372675	down	NW_018744593.1	1168958	1183637	-	LOC110699597	--	--	uncharacterized protein LOC110699597 isoform X1 [Chenopodium quinoa]	--	SubName: Full=Uncharacterized protein {ECO:0000313|EMBL:KNA05238.1};	--	--	--
gene-LOC110699625	8.1	6.12	5.21	2.34	2.05	2.09	237	176	150	65	64	56	0.354	-1.498	4.62156e-05	0.000878104	down	NW_018744593.1	1996690	2002760	+	LOC110699625	--	K13946 auxin influx carrier (AUX1 LAX family) | (RefSeq) auxin transporter-like protein 4 (A)	GABA transporter 1-like [Chenopodium quinoa]	RecName: Full=GABA transporter 1; Short=AtGAT1; AltName: Full=Bidirectional amino acid transporter 1;	SubName: Full=Uncharacterized protein {ECO:0000313|EMBL:KNA04807.1}; Flags: Fragment;	Amino acid transporters	GO:0016021,integral component of membrane; GO:0005886,plasma membrane; GO:0015171,amino acid transmembrane transporter activity; GO:0015185,gamma-aminobutyric acid transmembrane transporter activity; GO:0003333,amino acid transmembrane transport; GO:0015812,gamma-aminobutyric acid transport	Transmembrane amino acid transporter protein
gene-LOC110699662	192.98	140.94	204.72	123.06	40.6	40.28	3062	2197	3196	1854	689	586	0.4	-1.323	0.00175218	0.0170356	down	NW_018744593.1	2842517	2843310	-	LOC110699662	--	K02977 small subunit ribosomal protein S27Ae | (RefSeq) ubiquitin-40S ribosomal protein S27a (A)	hypothetical protein POPTR_002G190000v3 [Populus trichocarpa]	RecName: Full=Ubiquitin-40S ribosomal protein S27a; Contains: RecName: Full=Ubiquitin; Contains: RecName: Full=40S ribosomal protein S27a; Flags: Precursor;	SubName: Full=Uncharacterized protein {ECO:0000313|EMBL:GAY66909.1};	Ubiquitin/40S ribosomal protein S27a fusion	GO:0005634,nucleus; GO:0005840,ribosome; GO:0046872,metal ion binding; GO:0003735,structural constituent of ribosome; GO:0006412,translation	Ubiquitin family
gene-LOC110699685	1.07	0.52	0.83	0	0	0	21	10	16	0	0	0	0.013	-6.257	3.45735e-05	0.000681508	down	NW_018744593.1	4018442	4020857	+	LOC110699685	--	--	--	--	--	--	--	--
gene-LOC110699690	1.71	1.33	2.52	0.95	0.44	0.74	55	42	80	29	15	22	0.422	-1.245	0.00410281	0.0318753	down	NW_018744593.1	4296465	4298077	+	LOC110699690	--	K10249 elongation of very long chain fatty acids protein 4 [EC:2.3.1.199] | (RefSeq) GNS1/SUR4 membrane protein (A)	elongation of fatty acids protein 3-like [Chenopodium quinoa]	RecName: Full=Elongation of fatty acids protein 3-like; Short=Protein ELO3-like; EC=2.3.1.-; AltName: Full=Protein HIGH EXPRESSION OF OSMOTICALLY RESPONSIVE GENES 3; AltName: Full=Very long-chain fatty acid condensing enzyme HOS3; Short=VLCFA condensing enzyme HOS3;	SubName: Full=Uncharacterized protein {ECO:0000313|EMBL:KNA25242.1};	Fatty acyl-CoA elongase/Polyunsaturated fatty acid specific elongation enzyme	GO:0030176,integral component of endoplasmic reticulum membrane; GO:0009922,fatty acid elongase activity; GO:0071215,cellular response to abscisic acid stimulus; GO:0030497,fatty acid elongation; GO:0034625,fatty acid elongation, monounsaturated fatty acid; GO:0034626,fatty acid elongation, polyunsaturated fatty acid; GO:0019367,fatty acid elongation, saturated fatty acid; GO:0030148,sphingolipid…	GNS1/SUR4 family
gene-LOC110699738	2.97	2.7	4.35	2.15	0.94	1.22	159	142	229	109	54	60	0.468	-1.095	0.0012337	0.0130106	down	NW_018744593.1	5649882	5681130	+	LOC110699738	--	K06207 GTP-binding protein | (RefSeq) uncharacterized protein LOC110699738 (A)	uncharacterized protein LOC110699738 [Chenopodium quinoa]	RecName: Full=Putative elongation factor TypA-like SVR3, chloroplastic; AltName: Full=Protein HAPPY ON NORFLURAZON 23 {ECO:0000303|PubMed:21208309}; AltName: Full=Protein SUPPRESSOR OF VARIEGATION 3 {ECO:0000303|PubMed:21187014}; Flags: Precursor;	SubName: Full=Uncharacterized protein {ECO:0000313|EMBL:KNA26008.1};	Elongation factor-type GTP-binding protein	GO:0009507,chloroplast; GO:0005525,GTP binding; GO:0003924,GTPase activity; GO:0003746,translation elongation factor activity; GO:0050821,protein stabilization; GO:0009409,response to cold; GO:0006364,rRNA processing	Elongation factor Tu GTP binding domain
gene-LOC110699843	1.09	0.22	5.21	0.58	0.13	0.11	94	19	441	47	12	9	0.151	-2.727	0.00352381	0.0284996	down	NW_018742204.1	1248983	1257940	+	LOC110699843	--	K10683 BRCA1-associated RING domain protein 1 | (RefSeq) protein BREAST CANCER SUSCEPTIBILITY 1 homolog (A)	protein BREAST CANCER SUSCEPTIBILITY 1 homolog [Chenopodium quinoa]	RecName: Full=Protein BREAST CANCER SUSCEPTIBILITY 1 homolog {ECO:0000303|PubMed:12582233}; Short=AtBRCA1 {ECO:0000303|PubMed:12582233};	SubName: Full=Uncharacterized protein {ECO:0000313|EMBL:KNA09341.1};	Transcriptional regulator BRCA1	GO:0070531,BRCA1-A complex; GO:0031436,BRCA1-BARD1 complex; GO:0005634,nucleus; GO:0005886,plasma membrane; GO:0046872,metal ion binding; GO:0004842,ubiquitin-protein transferase activity; GO:0071480,cellular response to gamma radiation; GO:0006310,DNA recombination; GO:0006281,DNA repair; GO:0000724,double-strand break repair via homologous recombination; GO:0045717,negative regulation of fatty …	BRCA1 C Terminus (BRCT) domain
gene-LOC110699893	2.14	5.22	3.91	0.99	1.12	0.65	25	60	45	11	14	7	0.262	-1.931	0.00200358	0.0188139	down	NW_018744593.1	7551408	7552668	-	LOC110699893	--	--	--	--	--	--	--	--
gene-LOC110699918	2.02	2.26	2.48	0	0	0	92	101	111	0	0	0	0.002	-8.968	7.11665e-13	6.31438e-11	down	NW_018744603.1	399442	406415	-	LOC110699918	--	--	--	--	--	--	--	--
gene-LOC110699939	1.23	0.52	4.14	0	0	0	53	22	176	0	0	0	0.003	-8.521	2.68196e-09	1.29938e-07	down	NW_018744603.1	1444134	1446727	-	LOC110699939	--	--	--	--	--	--	--	--
gene-LOC110699954	1.3	0.58	2.3	0.55	0.18	0.28	55	24	96	22	8	11	0.273	-1.876	0.00234486	0.0211213	down	NW_018744603.1	2405382	2407503	-	LOC110699954	--	K17710 pentatricopeptide repeat domain-containing protein 1 | (RefSeq) putative pentatricopeptide repeat-containing protein At2g02150 (A)	pentatricopeptide repeat-containing protein At1g71060, mitochondrial-like [Chenopodium quinoa]	RecName: Full=Pentatricopeptide repeat-containing protein At1g71060, mitochondrial; Flags: Precursor;	SubName: Full=Uncharacterized protein {ECO:0000313|EMBL:KNA15957.1};	FOG: PPR repeat	GO:0043231,intracellular membrane-bounded organelle; GO:0005739,mitochondrion; GO:0004519,endonuclease activity; GO:0003723,RNA binding; GO:0009451,RNA modification	PPR repeat family
gene-LOC110699958	1.1	0.95	1.9	0.46	0.15	0.36	40	34	68	16	6	12	0.273	-1.875	0.000537272	0.00672112	down	NW_018744603.1	2532742	2534921	+	LOC110699958	--	K13116 ATP-dependent RNA helicase DDX41 [EC:3.6.4.13] | (RefSeq) uncharacterized protein LOC110093888 isoform X1 (A)	protein PIN-LIKES 2-like [Chenopodium quinoa]	RecName: Full=Protein PIN-LIKES 2 {ECO:0000303|PubMed:22504182}; AltName: Full=Auxin efflux carrier-like protein 2 {ECO:0000303|PubMed:22504182};	SubName: Full=Uncharacterized protein {ECO:0000313|EMBL:KNA08451.1};	Predicted membrane protein	GO:0005789,endoplasmic reticulum membrane; GO:0016021,integral component of membrane; GO:0010329,auxin efflux transmembrane transporter activity; GO:0010252,auxin homeostasis; GO:0009734,auxin-activated signaling pathway; GO:0010311,lateral root formation; GO:0040009,regulation of growth rate; GO:0009733,response to auxin	Membrane transport protein
gene-LOC110699977	0.42	1.11	0.74	0	0	0	8	21	14	0	0	0	0.014	-6.191	9.70384e-05	0.0016372	down	NW_018744603.1	1227491	1228911	-	LOC110699977	--	K23222 nuclease HARBI1 [EC:3.1.-.-] | (RefSeq) uncharacterized protein LOC104242359 (A)	uncharacterized protein LOC110699977 [Chenopodium quinoa]	--	SubName: Full=Zinc transporter, putative {ECO:0000313|EMBL:ABB55331.1};	Predicted transposase	GO:0016021,integral component of membrane; GO:0046873,metal ion transmembrane transporter activity	DDE superfamily endonuclease
gene-LOC110700017	7.56	4.78	8.48	4.12	1.14	0.69	309	192	341	160	50	26	0.302	-1.728	0.00300912	0.0254821	down	NW_018744616.1	618421	620764	-	LOC110700017	--	--	--	--	--	--	--	--
gene-LOC110700020	3.9	3.51	6.2	2.01	1.83	1.63	162	143	253	79	81	62	0.449	-1.156	1.01928e-05	0.000232727	down	NW_018744616.1	684280	694514	-	LOC110700020	--	K03549 KUP system potassium uptake protein | (RefSeq) potassium transporter 19-like (A)	uncharacterized protein LOC110700020 isoform X1 [Chenopodium quinoa]	--	SubName: Full=Uncharacterized protein {ECO:0000313|EMBL:KNA22348.1};	--	--	Transposase-associated domain
gene-LOC110700024	8.86	4.45	9.6	4.32	2.09	1.31	361	178	385	167	91	49	0.366	-1.449	0.001274	0.0133116	down	NW_018744616.1	857798	869851	+	LOC110700024	--	K01738 cysteine synthase [EC:2.5.1.47] | (RefSeq) cysteine synthase-like (A)	cysteine synthase-like isoform X1 [Chenopodium quinoa]	RecName: Full=Probable S-sulfocysteine synthase, chloroplastic; EC=2.5.1.47; AltName: Full=Beta-substituted Ala synthase 5;1; Short=ARAth-Bsas5;1; AltName: Full=CS26; AltName: Full=O-acetylserine sulfhydrylase; Flags: Precursor;	RecName: Full=Cysteine synthase {ECO:0000256|RuleBase:RU003985}; EC=2.5.1.47 {ECO:0000256|RuleBase:RU003985};	Cystathionine beta-synthase and related enzymes	GO:0009507,chloroplast; GO:0009543,chloroplast thylakoid lumen; GO:0031977,thylakoid lumen; GO:0004124,cysteine synthase activity; GO:0030170,pyridoxal phosphate binding; GO:0016740,transferase activity; GO:0006535,cysteine biosynthetic process from serine; GO:0015979,photosynthesis; GO:0009643,photosynthetic acclimation; GO:0010310,regulation of hydrogen peroxide metabolic process; GO:0090322,re…	Pyridoxal-phosphate dependent enzyme
gene-LOC110700034	11.36	8.24	19.23	4.76	2.34	3.17	254	181	423	101	56	65	0.296	-1.758	2.39782e-07	8.09106e-06	down	NW_018744616.1	1424560	1427037	-	LOC110700034	--	--	--	--	--	--	--	--
gene-LOC110700151	27.55	21.28	29.23	15.94	8.05	10.57	435	330	454	239	136	153	0.477	-1.068	0.000150348	0.00236566	down	NW_018744620.1	1103639	1106991	-	LOC110700151	--	K07466 replication factor A1 | (RefSeq) hypothetical protein (A)	uncharacterized protein At4g28440-like [Chenopodium quinoa]	RecName: Full=Uncharacterized protein At4g28440;	SubName: Full=Uncharacterized protein {ECO:0000313|EMBL:KMS96367.1};	--	GO:0005829,cytosol; GO:0003729,mRNA binding	--
gene-LOC110700152	4.96	4.36	6.18	2.58	1.88	2.16	168	145	206	83	68	67	0.467	-1.097	1.098e-05	0.000248091	down	NW_018744620.1	1137972	1144818	-	LOC110700152	--	--	protein NUCLEAR FUSION DEFECTIVE 6, chloroplastic/mitochondrial-like isoform X1 [Chenopodium quinoa]	RecName: Full=Protein NUCLEAR FUSION DEFECTIVE 6, chloroplastic/mitochondrial {ECO:0000303|PubMed:16698901}; Flags: Precursor;	SubName: Full=Uncharacterized protein {ECO:0000313|EMBL:KNA15885.1};	--	GO:0009507,chloroplast; GO:0005739,mitochondrion; GO:0000741,karyogamy; GO:0010197,polar nucleus fusion	--
gene-LOC110700162	0.62	0.42	0.56	0	0	0.04	18	12	16	0	0	1	0.026	-5.272	0.000263957	0.00378496	down	NW_018744620.1	1499346	1501324	+	LOC110700162	--	--	--	--	--	--	--	--
gene-LOC110700169	2.95	1.99	6.83	1.14	0.79	0.77	101	67	230	37	29	24	0.265	-1.915	2.24111e-05	0.000466116	down	NW_018744620.1	1739992	1742892	-	LOC110700169	--	--	--	--	--	--	--	--
gene-LOC110700174	9.68	18.83	10.72	0.86	1.04	0.63	201	384	219	17	23	12	0.068	-3.888	1.74222e-14	2.11295e-12	down	NW_018744620.1	1971264	1972302	-	LOC110700174	--	--	fasciclin-like arabinogalactan protein 9 [Chenopodium quinoa]	RecName: Full=Fasciclin-like arabinogalactan protein 9; Flags: Precursor;	SubName: Full=Uncharacterized protein {ECO:0000313|EMBL:KNA15304.1};	--	GO:0031225,anchored component of membrane; GO:0046658,anchored component of plasma membrane; GO:0005886,plasma membrane	Fasciclin domain
gene-LOC110700175	9.62	8.13	10.29	6.67	2.11	1.91	307	255	323	202	72	56	0.399	-1.326	0.00482041	0.0357102	down	NW_018744620.1	2121576	2125186	-	LOC110700175	--	--	--	--	--	--	--	--
gene-LOC110700176	2.89	3.53	5.06	2.11	1.04	1.79	65	78	112	45	25	37	0.47	-1.088	0.0055045	0.0392026	down	NW_018744620.1	2148235	2165934	+	LOC110700176	--	--	OPA3-like protein [Chenopodium quinoa]	--	SubName: Full=Uncharacterized protein {ECO:0000313|EMBL:KNA17136.1};	Predicted coiled-coil protein	--	Optic atrophy 3 protein (OPA3)
gene-LOC110700184	9.8	10.7	10.68	0	0	0	206	221	221	0	0	0	0.001	-10.07	2.90318e-16	4.75638e-14	down	NW_018744620.1	390063	391494	+	LOC110700184	--	--	--	--	--	--	--	--
gene-LOC110700235	1.87	1.49	2.61	0	0	0	51	40	70	0	0	0	0.004	-8.012	4.29828e-10	2.38925e-08	down	NW_018744625.1	121034	126603	-	LOC110700235	--	--	uncharacterized protein LOC110700235 [Chenopodium quinoa]	--	--	--	--	--
gene-LOC110700247	97.62	66.1	103.15	59.62	29.9	23.07	2497	1661	2596	1448	818	541	0.453	-1.143	0.00101732	0.0111473	down	NW_018744626.1	70244	73825	+	LOC110700247	--	K02932 large subunit ribosomal protein L5e | (RefSeq) 60S ribosomal protein L5-like (A)	60S ribosomal protein L5-like [Chenopodium quinoa]	RecName: Full=60S ribosomal protein L5;	SubName: Full=Uncharacterized protein {ECO:0000313|EMBL:KNA05112.1};	60S ribosomal protein L5	GO:0005634,nucleus; GO:0005840,ribosome; GO:0008097,5S rRNA binding; GO:0003735,structural constituent of ribosome; GO:0006412,translation	Ribosomal large subunit proteins 60S L5, and 50S L18
gene-LOC110700301	0.62	0.89	1.43	0.31	0.28	0.3	29	41	66	14	14	13	0.341	-1.551	0.00184719	0.0176918	down	NW_018744626.1	612530	617848	-	LOC110700301	--	K19791 iron transport multicopper oxidase | (RefSeq) L-ascorbate oxidase homolog (A)	monocopper oxidase-like protein SKU5 [Chenopodium quinoa]	RecName: Full=Monocopper oxidase-like protein SKU5; AltName: Full=Skewed roots; Flags: Precursor;	SubName: Full=Uncharacterized protein {ECO:0000313|EMBL:KNA21273.1};	Multicopper oxidases	GO:0031225,anchored component of membrane; GO:0046658,anchored component of plasma membrane; GO:0048046,apoplast; GO:0005618,cell wall; GO:0016020,membrane; GO:0009505,plant-type cell wall; GO:0005886,plasma membrane; GO:0009506,plasmodesma; GO:0005774,vacuolar membrane; GO:0005507,copper ion binding; GO:0016722,oxidoreductase activity, oxidizing metal ions; GO:0009932,cell tip growth	Multicopper oxidase
gene-LOC110700307	7.28	5.15	9.7	4.47	2.12	2.15	266	185	349	155	83	72	0.432	-1.212	0.00036366	0.00490935	down	NW_018744626.1	683343	688614	-	LOC110700307	--	--	protein PEP-RELATED DEVELOPMENT ARRESTED 1, chloroplastic-like [Chenopodium quinoa]	RecName: Full=Protein PEP-RELATED DEVELOPMENT ARRESTED 1, chloroplastic {ECO:0000303|PubMed:24132784}; Short=AtPRDA1 {ECO:0000303|PubMed:24132784}; Flags: Precursor;	SubName: Full=Uncharacterized protein isoform 1 {ECO:0000313|EMBL:EOX93757.1};	--	GO:0042644,chloroplast nucleoid; GO:0009658,chloroplast organization; GO:0006355,regulation of transcription, DNA-templated	--
gene-LOC110700331	3.61	2.02	4.35	0	0	0	91	50	108	0	0	0	0.003	-8.631	1.15133e-11	8.5162e-10	down	NW_018742390.1	5892722	5894081	+	LOC110700331	--	--	--	--	--	--	--	--
gene-LOC110700353	2.7	0.59	7.82	1.22	0.42	0.48	79	17	225	34	13	13	0.227	-2.137	0.00671961	0.0453607	down	NW_018744626.1	1172666	1178203	-	LOC110700353	--	K11550 kinetochore protein Spc25, animal type | (RefSeq) probable kinetochore protein SPC25 (A)	probable kinetochore protein SPC25 [Chenopodium quinoa]	--	SubName: Full=Uncharacterized protein {ECO:0000313|EMBL:KNA24366.1};	Uncharacterized conserved protein	--	Chromosome segregation protein Spc25
gene-LOC110700371	2.15	1.24	5.76	1.21	0.6	0.56	138	78	364	74	41	33	0.302	-1.729	0.00103967	0.011339	down	NW_018744626.1	1398361	1416825	-	LOC110700371	--	--	protein MICRORCHIDIA 6-like [Chenopodium quinoa]	RecName: Full=Protein MICRORCHIDIA 6 {ECO:0000303|PubMed:22555433}; Short=AtMORC6 {ECO:0000303|PubMed:22555433}; EC=3.6.-.- {ECO:0000269|PubMed:22560611}; AltName: Full=Protein CRT1-homolog 6 {ECO:0000303|PubMed:19704828}; Short=CRT1-h6 {ECO:0000303|PubMed:19704828}; AltName: Full=Protein DEFECTIVE IN MERISTEM SILENCING 11 {ECO:0000303|PubMed:22560611};	SubName: Full=Uncharacterized protein {ECO:0000313|EMBL:KNA15292.1};	MORC family ATPases	GO:0009941,chloroplast envelope; GO:0005634,nucleus; GO:0009506,plasmodesma; GO:0005524,ATP binding; GO:0016887,ATPase activity; GO:0003677,DNA binding; GO:0004519,endonuclease activity; GO:0042803,protein homodimerization activity; GO:0003723,RNA binding; GO:0016569,covalent chromatin modification; GO:0006952,defense response; GO:0006281,DNA repair; GO:1902290,positive regulation of defense resp…	Morc6 ribosomal protein S5 domain 2-like
gene-LOC110700437	2.39	1.69	3.53	0.52	0.46	0.97	78	54	113	16	16	29	0.289	-1.789	0.000133655	0.0021464	down	NW_018744626.1	2247849	2252238	-	LOC110700437	--	K15030 translation initiation factor 3 subunit M | (RefSeq) uncharacterized protein LOC106431989 (A)	F-box protein CPR30-like [Chenopodium quinoa]	RecName: Full=F-box protein CPR1; AltName: Full=Protein CONSTITUTIVE EXPRESSER OF PR GENES 1; AltName: Full=Protein CONSTITUTIVE EXPRESSER OF PR GENES 30 {ECO:0000303|PubMed:19682297};	SubName: Full=Uncharacterized protein {ECO:0000313|EMBL:KNA25181.1};	--	GO:0005737,cytoplasm; GO:0005634,nucleus; GO:0004842,ubiquitin-protein transferase activity; GO:0031348,negative regulation of defense response; GO:0042177,negative regulation of protein catabolic process; GO:0009626,plant-type hypersensitive response; GO:0031146,SCF-dependent proteasomal ubiquitin-dependent protein catabolic process	F-box domain
gene-LOC110700479	313.44	203.87	298.13	186.57	83.71	73.43	5080	3246	4754	2871	1451	1091	0.449	-1.156	0.00136746	0.0140523	down	NW_018744626.1	2862239	2863049	-	LOC110700479	--	K02960 small subunit ribosomal protein S16e | (RefSeq) 40S ribosomal protein S16-like (A)	40S ribosomal protein S16-like [Chenopodium quinoa]	RecName: Full=40S ribosomal protein S16;	SubName: Full=Uncharacterized protein {ECO:0000313|EMBL:KNA16602.1};	40S ribosomal protein S16	GO:0005840,ribosome; GO:0003735,structural constituent of ribosome; GO:0006412,translation	Ribosomal protein S9/S16
gene-LOC110700533	7.8	5.37	28.44	4.17	3.31	1.82	333	225	1194	169	151	71	0.267	-1.903	0.000479688	0.00614271	down	NW_018744626.1	3565195	3568289	+	LOC110700533	--	K14638 solute carrier family 15 (peptide/histidine transporter), member 3/4 | (RefSeq) protein NRT1/ PTR FAMILY 4.6 (A)	protein NRT1/ PTR FAMILY 4.6-like [Chenopodium quinoa]	RecName: Full=Protein NRT1/ PTR FAMILY 4.6; Short=AtNPF4.6; AltName: Full=Nitrate transporter 1.2; AltName: Full=Nitrate transporter NTL1; AltName: Full=Protein ABA-IMPORTING TRANSPORTER 1;	SubName: Full=Uncharacterized protein {ECO:0000313|EMBL:KNA14366.1};	H+/oligopeptide symporter	GO:0016021,integral component of membrane; GO:0005886,plasma membrane; GO:0090440,abscisic acid transmembrane transporter activity; GO:0015293,symporter activity; GO:0080168,abscisic acid transport; GO:0042128,nitrate assimilation; GO:0010119,regulation of stomatal movement; GO:0009624,response to nematode	POT family
gene-LOC110700539	0.93	0.44	1.35	0.34	0.07	0.16	26	12	37	9	2	4	0.228	-2.13	0.0067515	0.045498	down	NW_018744626.1	3584831	3588247	+	LOC110700539	--	K17286 erythrocyte band 7 integral membrane protein | (RefSeq) erythrocyte band 7 integral membrane protein-like (A)	hypersensitive-induced response protein 1-like isoform X2 [Chenopodium quinoa]	RecName: Full=Hypersensitive-induced response protein 1 {ECO:0000303|PubMed:15060130}; Short=AtHIR1 {ECO:0000303|PubMed:15060130};	SubName: Full=Uncharacterized protein {ECO:0000313|EMBL:KNA14364.1};	Prohibitins and stomatins of the PID superfamily	GO:0005794,Golgi apparatus; GO:0016020,membrane; GO:0005886,plasma membrane; GO:0009506,plasmodesma; GO:0005774,vacuolar membrane; GO:0005773,vacuole; GO:0043424,protein histidine kinase binding	SPFH domain / Band 7 family
gene-LOC110700591	211.02	153.04	183.29	132.76	67.8	54.75	2779	1980	2375	1660	955	661	0.493	-1.021	0.00324134	0.0268464	down	NW_018744626.1	4189732	4192518	-	LOC110700591	--	K02915 large subunit ribosomal protein L34e | (RefSeq) 60S ribosomal protein L34-like (A)	60S ribosomal protein L34-like [Chenopodium quinoa]	RecName: Full=60S ribosomal protein L34;	SubName: Full=Uncharacterized protein {ECO:0000313|EMBL:KNA22879.1};	60s ribosomal protein L34	GO:0005840,ribosome; GO:0003735,structural constituent of ribosome; GO:0006412,translation	Ribosomal protein L34e
gene-LOC110700600	8.96	5.14	12.53	4.27	1.94	2.54	181	102	249	82	42	47	0.365	-1.454	0.000153151	0.00240369	down	NW_018744626.1	4379497	4382289	+	LOC110700600	--	K01855 tRNA pseudouridine38/39 synthase [EC:5.4.99.45] | (RefSeq) pus4; tRNA pseudouridine synthase mitochondrial precursor (A)	protein EMBRYO DEFECTIVE 514-like [Chenopodium quinoa]	RecName: Full=Protein EMBRYO DEFECTIVE 514 {ECO:0000303|PubMed:15341625}; AltName: Full=Protein DOMINO 1 {ECO:0000303|PubMed:15341625};	SubName: Full=Uncharacterized protein {ECO:0000313|EMBL:KNA21101.1};	--	GO:0005634,nucleus; GO:0009793,embryo development ending in seed dormancy; GO:0017126,nucleologenesis; GO:0051302,regulation of cell division	Protein of unknown function (DUF3223)
gene-LOC110700610	2.07	1.77	3.01	0.83	0.43	0.97	63	53	90	24	14	27	0.359	-1.479	0.000706045	0.00838056	down	NW_018744626.1	4483227	4486152	-	LOC110700610	--	K20628 expansin | (RefSeq) expansin-A1 (A)	expansin-A10-like [Chenopodium quinoa]	RecName: Full=Expansin-A10; Short=AtEXPA10; AltName: Full=Alpha-expansin-10; Short=At-EXP10; Short=AtEx10; AltName: Full=Ath-ExpAlpha-1.1; Flags: Precursor;	SubName: Full=Uncharacterized protein {ECO:0000313|EMBL:KNA15350.1};	--	GO:0005618,cell wall; GO:0005576,extracellular region; GO:0016020,membrane; GO:0009664,plant-type cell wall organization	Pollen allergen
gene-LOC110700626	10.66	4.39	11.12	4.52	3.67	2.35	405	164	416	163	149	82	0.449	-1.154	0.00304505	0.0257108	down	NW_018744626.1	4795829	4797730	-	LOC110700626	--	--	--	--	--	--	--	--
gene-LOC110700676	255.92	204.27	249.41	178.17	68.01	63	4475	3509	4291	2958	1272	1010	0.457	-1.129	0.00406939	0.0316948	down	NW_018744626.1	5649683	5652095	-	LOC110700676	--	K02966 small subunit ribosomal protein S19e | (RefSeq) 40S ribosomal protein S19-1 (A)	40S ribosomal protein S19-1 [Chenopodium quinoa]	RecName: Full=40S ribosomal protein S19-1;	SubName: Full=Uncharacterized protein {ECO:0000313|EMBL:KNA16999.1};	40S ribosomal protein S19	GO:0005618,cell wall; GO:0005829,cytosol; GO:0022626,cytosolic ribosome; GO:0022627,cytosolic small ribosomal subunit; GO:0009506,plasmodesma; GO:0042788,polysomal ribosome; GO:0003735,structural constituent of ribosome; GO:0000028,ribosomal small subunit assembly; GO:0006412,translation	Ribosomal protein S19e
gene-LOC110700734	0.13	0.2	0.65	0	0	0	4	6	20	0	0	0	0.022	-5.502	0.00201126	0.0188718	down	NW_018742390.1	8128120	8129685	+	LOC110700734	--	K19747 BAHD acyltransferase [EC:2.3.1.-] | (RefSeq) BAHD acyltransferase DCR (A)	protein ENHANCED PSEUDOMONAS SUSCEPTIBILTY 1-like [Chenopodium quinoa]	RecName: Full=Protein ENHANCED PSEUDOMONAS SUSCEPTIBILTY 1 {ECO:0000303|PubMed:19036031}; EC=2.3.1.- {ECO:0000305};	SubName: Full=Uncharacterized protein {ECO:0000313|EMBL:KNA04600.1};	--	GO:0016747,transferase activity, transferring acyl groups other than amino-acyl groups; GO:0006952,defense response; GO:1900424,regulation of defense response to bacterium; GO:1900150,regulation of defense response to fungus; GO:0009617,response to bacterium; GO:0009753,response to jasmonic acid; GO:0009697,salicylic acid biosynthetic process	Transferase family
gene-LOC110700743	0.67	0.68	0.98	0	0	0	30	30	43	0	0	0	0.006	-7.382	2.74759e-08	1.11196e-06	down	NW_018742390.1	8198285	8201542	+	LOC110700743	--	--	--	--	--	--	--	--
gene-LOC110700746	1.71	1.28	1.28	0.38	0.25	0.1	19	14	14	4	3	1	0.183	-2.453	0.00550402	0.0392026	down	NW_018744626.1	4848966	4851161	+	LOC110700746	--	K01183 chitinase [EC:3.2.1.14] | (RefSeq) basic endochitinase-like (A)	basic endochitinase-like [Chenopodium quinoa]	RecName: Full=Acidic endochitinase; EC=3.2.1.14; Flags: Precursor;	SubName: Full=Chitinase family protein {ECO:0000313|EMBL:EEE99153.2};	Chitinase	GO:0004568,chitinase activity; GO:0006032,chitin catabolic process; GO:0000272,polysaccharide catabolic process	Glycosyl hydrolases family 18
gene-LOC110700757	0.25	0.25	0.17	0	0	0	9	9	6	0	0	0	0.025	-5.347	0.00206778	0.0192526	down	NW_018742390.1	8231634	8235240	+	LOC110700757	--	--	--	--	--	--	--	--
gene-LOC110700936	5.72	3.05	7.05	2.78	0.91	1.46	141	74	171	65	24	33	0.356	-1.49	0.00118981	0.0126333	down	NW_018744633.1	1898314	1902212	+	LOC110700936	--	--	mediator-associated protein 2-like [Chenopodium quinoa]	RecName: Full=Mediator-associated protein 2;	SubName: Full=Uncharacterized protein {ECO:0000313|EMBL:KNA15824.1};	--	GO:0016592,mediator complex; GO:0005730,nucleolus	--
gene-LOC110700940	172.76	116.11	175.38	114.79	41.42	37.49	3373	2227	3369	2128	865	671	0.442	-1.179	0.00453009	0.034111	down	NW_018744633.1	1961803	1964219	-	LOC110700940	--	K02872 large subunit ribosomal protein L13Ae | (RefSeq) 60S ribosomal protein L13a-4-like (A)	60S ribosomal protein L13a-4-like [Chenopodium quinoa]	RecName: Full=60S ribosomal protein L13a-4;	SubName: Full=Uncharacterized protein {ECO:0000313|EMBL:KNA23023.1};	60S ribosomal protein L13a	GO:0022625,cytosolic large ribosomal subunit; GO:0022626,cytosolic ribosome; GO:0003729,mRNA binding; GO:0003735,structural constituent of ribosome; GO:0006412,translation	Ribosomal protein L13
gene-LOC110700950	1.21	0.72	2.41	0.65	0.32	0.42	53	31	104	27	15	17	0.365	-1.452	0.00476385	0.0354127	down	NW_018744633.1	2280822	2283370	+	LOC110700950	--	--	uncharacterized protein LOC110700950 [Chenopodium quinoa]	--	SubName: Full=Uncharacterized protein {ECO:0000313|EMBL:KNA04462.1};	--	--	--
gene-LOC110700975	0.27	0.19	0.27	0	0	0	16	11	16	0	0	0	0.014	-6.128	4.67184e-05	0.000884949	down	NW_018744633.1	2746086	2751532	-	LOC110700975	--	--	--	--	--	--	--	--
gene-LOC110700994	3.04	1.3	5.22	1.47	0.69	0.49	74	31	125	34	18	11	0.315	-1.666	0.00426345	0.0326614	down	NW_018744633.1	2937523	2941096	-	LOC110700994	--	K00599 methyltransferase-like protein 6 [EC:2.1.1.-] | (RefSeq) hypothetical protein (A)	protein N-lysine methyltransferase METTL21A-like [Chenopodium quinoa]	--	SubName: Full=Uncharacterized protein {ECO:0000313|EMBL:KNA19105.1};	--	--	Lysine methyltransferase
gene-LOC110700997	13.7	6.34	15.64	5.63	3.29	3.6	187	85	210	73	48	45	0.39	-1.359	0.00036307	0.00490492	down	NW_018744633.1	2963058	2965745	-	LOC110700997	--	K04078 chaperonin GroES | (RefSeq) 10 kDa chaperonin, mitochondrial-like (A)	10 kDa chaperonin, mitochondrial-like [Chenopodium quinoa]	RecName: Full=10 kDa chaperonin, mitochondrial; AltName: Full=Chaperonin 10; Short=CPN10; AltName: Full=Protein groES; Flags: Precursor;	SubName: Full=Uncharacterized protein {ECO:0000313|EMBL:KNA19109.1};	Mitochondrial chaperonin	GO:0005759,mitochondrial matrix; GO:0005739,mitochondrion; GO:0005524,ATP binding; GO:0051087,chaperone binding; GO:0005507,copper ion binding; GO:0051082,unfolded protein binding; GO:0051085,chaperone cofactor-dependent protein refolding; GO:0009408,response to heat; GO:0006986,response to unfolded protein	Chaperonin 10 Kd subunit
gene-LOC110701015	10.46	7.59	11.84	2.11	1.11	1.64	167	119	186	32	19	24	0.177	-2.496	2.99232e-13	2.86603e-11	down	NW_018744633.1	3151910	3153210	-	LOC110701015	--	K03505 DNA polymerase delta subunit 4 | (RefSeq) uncharacterized protein LOC110701015 (A)	uncharacterized protein LOC110701015 [Chenopodium quinoa]	--	SubName: Full=Uncharacterized protein {ECO:0000313|EMBL:KNA13736.1};	--	GO:0005634,nucleus; GO:0006260,DNA replication	DNA polymerase delta, subunit 4
gene-LOC110701049	18.24	9.26	59.36	10.22	3.91	2.68	327	163	1047	174	75	44	0.226	-2.144	0.000687493	0.00820729	down	NW_018744633.1	3450372	3451268	+	LOC110701049	--	--	uncharacterized protein LOC110701049 [Chenopodium quinoa]	--	SubName: Full=Uncharacterized protein {ECO:0000313|EMBL:KNA16016.1};	--	GO:0016021,integral component of membrane	--
gene-LOC110701065	234.14	181.92	165.57	135.52	50.8	43.02	2784	2125	1937	1530	646	469	0.405	-1.305	0.00360092	0.0289436	down	NW_018744633.1	3583040	3585345	-	LOC110701065	--	K02923 large subunit ribosomal protein L38e | (RefSeq) 60S ribosomal protein L38 (A)	unnamed protein product [Coffea canephora]	RecName: Full=60S ribosomal protein L38;	SubName: Full=Uncharacterized protein {ECO:0000313|EMBL:CDP18171.1};	60S ribosomal protein L38	GO:0022625,cytosolic large ribosomal subunit; GO:0022626,cytosolic ribosome; GO:0003723,RNA binding; GO:0003735,structural constituent of ribosome; GO:0022618,ribonucleoprotein complex assembly; GO:0006412,translation	Ribosomal L38e protein family
gene-LOC110701075	24.33	16.34	27.9	15.29	6.5	7.19	476	314	537	284	136	129	0.457	-1.131	0.00116196	0.0124117	down	NW_018744633.1	3652645	3653623	-	LOC110701075	--	--	protein TIC 20-II, chloroplastic-like [Chenopodium quinoa]	RecName: Full=Protein TIC 20-II, chloroplastic; AltName: Full=Translocon at the inner envelope membrane of chloroplasts 20-II; Short=AtTIC20-II; Flags: Precursor;	SubName: Full=Uncharacterized protein {ECO:0000313|EMBL:KNA21374.1};	--	GO:0009507,chloroplast; GO:0009941,chloroplast envelope; GO:0009706,chloroplast inner membrane; GO:0016021,integral component of membrane; GO:0005739,mitochondrion; GO:0009536,plastid; GO:0015031,protein transport	Chloroplast import apparatus Tic20-like
gene-LOC110701082	12.52	13.21	14.55	5.08	4.2	5.15	493	511	564	190	177	186	0.388	-1.364	7.27562e-09	3.25477e-07	down	NW_018744633.1	3692113	3698581	+	LOC110701082	--	K16296 serine carboxypeptidase-like clade I [EC:3.4.16.-] | (RefSeq) serine carboxypeptidase-like 20 (A)	serine carboxypeptidase-like 20 [Chenopodium quinoa]	RecName: Full=Serine carboxypeptidase-like 20; EC=3.4.16.-; Flags: Precursor;	RecName: Full=Carboxypeptidase {ECO:0000256|RuleBase:RU361156}; EC=3.4.16.- {ECO:0000256|RuleBase:RU361156};	Serine carboxypeptidases (lysosomal cathepsin A)	GO:0005576,extracellular region; GO:0005777,peroxisome; GO:0005773,vacuole; GO:0004180,carboxypeptidase activity; GO:0016747,transferase activity, transferring acyl groups other than amino-acyl groups; GO:0019748,secondary metabolic process	Serine carboxypeptidase
gene-LOC110701173	8.04	6.73	9.25	4.73	2.86	2.98	197	162	223	110	75	67	0.477	-1.068	9.74324e-05	0.00164311	down	NW_018744633.1	4557033	4559463	+	LOC110701173	--	K14823 rRNA-processing protein EBP2 | (RefSeq) probable rRNA-processing protein EBP2 homolog (A)	probable rRNA-processing protein EBP2 homolog [Chenopodium quinoa]	RecName: Full=Probable rRNA-processing protein EBP2 homolog;	SubName: Full=Uncharacterized protein {ECO:0000313|EMBL:KNA03619.1};	Nucleolar protein-like/EBNA1-binding protein	GO:0034399,nuclear periphery; GO:0005730,nucleolus; GO:0030687,preribosome, large subunit precursor; GO:0003924,GTPase activity; GO:0003723,RNA binding; GO:0042273,ribosomal large subunit biogenesis; GO:0006364,rRNA processing	Eukaryotic rRNA processing protein EBP2
gene-LOC110701188	8.28	6.62	10.17	5.74	2.5	2.73	149	117	180	98	48	45	0.471	-1.085	0.00301352	0.025501	down	NW_018744633.1	4697696	4700750	-	LOC110701188	--	--	uncharacterized protein LOC110701188 [Chenopodium quinoa]	--	SubName: Full=Uncharacterized protein {ECO:0000313|EMBL:KNA13063.1};	--	--	IGR protein motif
gene-LOC110701196	65.15	35.66	192.92	24.46	2.51	2.49	1285	691	3744	458	53	45	0.112	-3.163	0.000113179	0.0018657	down	NW_018744633.1	4753485	4754471	+	LOC110701196	--	--	uncharacterized protein LOC110701196 [Chenopodium quinoa]	--	SubName: Full=Uncharacterized protein {ECO:0000313|EMBL:KNA14131.1};	--	--	Protein of unknown function, DUF538
gene-LOC110701203	375.3	482.79	238.23	11.54	16	15.85	12060	15241	7532	352	550	467	0.041	-4.593	5.28766e-26	2.90464e-23	down	NW_018744633.1	4798711	4802645	+	LOC110701203	--	--	--	--	--	--	--	--
gene-LOC110701258	286.61	226.92	271.58	201.82	72.1	75.81	4330	3368	4037	2895	1165	1050	0.466	-1.1	0.0053888	0.0385989	down	NW_018744633.1	5413418	5415304	-	LOC110701258	--	K02910 large subunit ribosomal protein L31e | (RefSeq) 60S ribosomal protein L31-like (A)	60S ribosomal protein L31-like [Chenopodium quinoa]	RecName: Full=60S ribosomal protein L31;	SubName: Full=Uncharacterized protein {ECO:0000313|EMBL:KNA20207.1};	60S ribosomal protein L31	GO:0005840,ribosome; GO:0003735,structural constituent of ribosome; GO:0006412,translation	Ribosomal protein L31e
gene-LOC110701287	1.08	0.96	1.48	0.21	0.02	0.11	55	48	74	10	1	5	0.1	-3.316	4.5893e-07	1.4652e-05	down	NW_018744633.1	5818948	5823286	+	LOC110701287	--	--	uncharacterized protein LOC110701287 [Chenopodium quinoa]	--	SubName: Full=Uncharacterized protein {ECO:0000313|EMBL:KNA09846.1};	--	--	--
gene-LOC110701289	8.88	4.71	16.34	5.2	2.98	3.55	142	74	257	79	51	52	0.449	-1.156	0.00592802	0.0413975	down	NW_018744633.1	5824381	5827433	+	LOC110701289	--	--	RNA polymerase II transcriptional coactivator KIWI-like isoform X1 [Chenopodium quinoa]	RecName: Full=RNA polymerase II transcriptional coactivator KIWI;	SubName: Full=Uncharacterized protein {ECO:0000313|EMBL:KNA09844.1};	Transcriptional coactivator	GO:0005634,nucleus; GO:0005667,transcription factor complex; GO:0003677,DNA binding; GO:0003713,transcription coactivator activity; GO:0060261,positive regulation of transcription initiation from RNA polymerase II promoter; GO:0006351,transcription, DNA-templated	Transcriptional Coactivator p15 (PC4)
gene-LOC110701315	2.63	1.4	5.07	0.77	0.3	0.8	90	47	171	25	11	25	0.235	-2.088	0.000129978	0.00209638	down	NW_018744633.1	6174283	6178254	+	LOC110701315	--	K09580 protein disulfide-isomerase A1 [EC:5.3.4.1] | (RefSeq) protein disulfide-isomerase-like (A)	protein disulfide-isomerase-like [Chenopodium quinoa]	RecName: Full=Protein disulfide-isomerase; Short=PDI; EC=5.3.4.1; Flags: Precursor;	RecName: Full=Protein disulfide-isomerase {ECO:0000256|RuleBase:RU361130}; EC=5.3.4.1 {ECO:0000256|RuleBase:RU361130};	Protein disulfide isomerase (prolyl 4-hydroxylase beta subunit)	GO:0005788,endoplasmic reticulum lumen; GO:0003756,protein disulfide isomerase activity; GO:0045454,cell redox homeostasis	Thioredoxin
gene-LOC110701383	2.14	1.53	2.53	0	0.23	0.44	155	109	180	0	18	29	0.125	-2.994	0.00124588	0.0130947	down	NW_018744633.1	6913918	6918793	+	LOC110701383	--	--	--	--	--	--	--	--
gene-LOC110701422	8.84	8.3	11.61	1.15	1.06	1.06	437	403	565	54	56	48	0.125	-2.997	1.26933e-38	1.82364e-35	down	NW_018742204.1	2864167	2887553	+	LOC110701422	--	--	--	--	--	--	--	--
gene-LOC110701499	9.76	13.15	13.67	0.76	1.23	1.94	148	196	204	11	20	27	0.118	-3.079	2.467e-11	1.71606e-09	down	NW_018744633.1	931862	932720	-	LOC110701499	--	--	--	--	--	--	--	--
gene-LOC110701609	6.64	4.24	7.74	0.37	0	0	75	47	86	4	0	0	0.021	-5.553	8.44591e-10	4.41861e-08	down	NW_018744633.1	848817	851260	-	LOC110701609	--	--	--	--	--	--	--	--
gene-LOC110701687	79.23	57.75	75.36	40.65	12.77	11.52	1433	1026	1341	698	247	191	0.319	-1.647	0.000351837	0.00479129	down	NW_018744647.1	2026244	2027148	+	LOC110701687	--	K02870 large subunit ribosomal protein L12e | (RefSeq) 60S ribosomal protein L12-1 (A)	60S ribosomal protein L12-1 [Chenopodium quinoa]	RecName: Full=60S ribosomal protein L12-1;	SubName: Full=Uncharacterized protein {ECO:0000313|EMBL:KNA25907.1};	40S ribosomal protein S2	GO:0009507,chloroplast; GO:0005829,cytosol; GO:0022625,cytosolic large ribosomal subunit; GO:0022626,cytosolic ribosome; GO:0005730,nucleolus; GO:0005634,nucleus; GO:0009506,plasmodesma; GO:0005773,vacuole; GO:0019843,rRNA binding; GO:0003735,structural constituent of ribosome; GO:0008270,zinc ion binding; GO:0009409,response to cold; GO:0000027,ribosomal large subunit assembly; GO:0006412,transl…	Ribosomal protein L11, N-terminal domain
gene-LOC110701695	1.06	1.2	0.84	0.12	0	0	9	10	7	1	0	0	0.044	-4.496	0.00495741	0.0363953	down	NW_018744656.1	208242	209069	-	LOC110701695	--	--	--	--	--	--	--	--
gene-LOC110701709	3.29	4.08	6.08	1.73	1.13	1.09	280	341	509	140	103	85	0.323	-1.63	1.07073e-08	4.667e-07	down	NW_018744656.1	700439	717379	+	LOC110701709	--	--	uncharacterized protein LOC110701709 [Chenopodium quinoa]	--	--	--	--	--
gene-LOC110701741	22.5	13.66	34.78	9.03	5.54	4.54	357	213	543	136	94	66	0.302	-1.727	7.10632e-07	2.17225e-05	down	NW_018744656.1	448523	451484	+	LOC110701741	--	--	uncharacterized protein LOC110701741 isoform X1 [Chenopodium quinoa]	--	SubName: Full=Uncharacterized protein {ECO:0000313|EMBL:KNA06093.1};	--	--	--
gene-LOC110701770	0.87	0.62	1.5	0	0.04	0	23	16	39	0	1	0	0.016	-5.976	1.3412e-05	0.000297679	down	NW_018744659.1	138997	141437	-	LOC110701770	--	K13065 shikimate O-hydroxycinnamoyltransferase [EC:2.3.1.133] | (RefSeq) anthranilate N-benzoyltransferase protein 3-like (A)	anthranilate N-benzoyltransferase protein 3-like [Chenopodium quinoa]	RecName: Full=Anthranilate N-benzoyltransferase protein 1; EC=2.3.1.144; AltName: Full=Anthranilate N-hydroxycinnamoyl/benzoyltransferase 1;	SubName: Full=Uncharacterized protein {ECO:0000313|EMBL:KNA19134.1};	--	GO:0047672,anthranilate N-benzoyltransferase activity; GO:0009813,flavonoid biosynthetic process	Transferase family
gene-LOC110701871	5.75	2.22	13.25	3.08	1.42	1.65	319	121	723	162	84	84	0.338	-1.563	0.00334585	0.0275046	down	NW_018744662.1	51120	57420	-	LOC110701871	--	K09487 heat shock protein 90kDa beta | (RefSeq) heat shock protein 90-6, mitochondrial-like (A)	heat shock protein 90-6, mitochondrial-like [Chenopodium quinoa]	RecName: Full=Heat shock protein 90-6, mitochondrial {ECO:0000305}; Short=AtHSP90.6 {ECO:0000305}; Short=AtHsp90-6 {ECO:0000303|PubMed:11599565}; AltName: Full=Heat shock protein 89-1 {ECO:0000305}; Short=Hsp89-1 {ECO:0000303|PubMed:11599565}; Flags: Precursor;	SubName: Full=Uncharacterized protein {ECO:0000313|EMBL:KMS96453.1};	Molecular chaperone (HSP90 family)	GO:0005618,cell wall; GO:0009570,chloroplast stroma; GO:0005739,mitochondrion; GO:0005524,ATP binding; GO:0051082,unfolded protein binding; GO:0006457,protein folding; GO:0006950,response to stress	Hsp90 protein
gene-LOC110701903	7.29	4.69	6.81	3.86	1.21	0.99	209	132	192	105	37	26	0.339	-1.563	0.00244617	0.0218077	down	NW_018744662.1	853214	855712	+	LOC110701903	--	K08867 WNK lysine deficient protein kinase [EC:2.7.11.1] | (RefSeq) probable serine/threonine-protein kinase WNK11 (A)	probable serine/threonine-protein kinase WNK11 [Chenopodium quinoa]	RecName: Full=Probable serine/threonine-protein kinase WNK11; Short=AtWNK11; EC=2.7.11.1; AltName: Full=Protein kinase with no lysine 11;	SubName: Full=Uncharacterized protein {ECO:0000313|EMBL:KNA22268.1};	Serine/threonine protein kinase	GO:0005829,cytosol; GO:0005524,ATP binding; GO:0004674,protein serine/threonine kinase activity; GO:0035556,intracellular signal transduction; GO:0006468,protein phosphorylation	Protein kinase domain
gene-LOC110701932	197.28	161.28	191.47	122.59	48.16	42.09	3083	2476	2944	1819	805	603	0.405	-1.302	0.00100862	0.011091	down	NW_018744662.1	1309375	1311760	-	LOC110701932	--	K02893 large subunit ribosomal protein L23Ae | (RefSeq) 60S ribosomal protein L23A (A)	60S ribosomal protein L23A [Chenopodium quinoa]	RecName: Full=60S ribosomal protein L23a;	SubName: Full=Uncharacterized protein {ECO:0000313|EMBL:EEF05190.1};	60s ribosomal protein L23	GO:0005840,ribosome; GO:0019843,rRNA binding; GO:0003735,structural constituent of ribosome; GO:0006412,translation	Ribosomal protein L23, N-terminal domain
gene-LOC110701948	16.45	14.8	30.99	10.88	6.63	8.99	559	494	1036	351	241	280	0.479	-1.063	0.000104459	0.00174195	down	NW_018744662.1	1542508	1547326	+	LOC110701948	--	K09584 protein disulfide-isomerase A6 [EC:5.3.4.1] | (RefSeq) protein disulfide isomerase-like 2-3 (A)	protein disulfide isomerase-like 2-3 [Chenopodium quinoa]	RecName: Full=Protein disulfide isomerase-like 2-3; Short=OsPDIL2-3; EC=5.3.4.1; AltName: Full=Protein disulfide isomerase-like 5-1; Short=OsPDIL5-1; Flags: Precursor;	SubName: Full=Uncharacterized protein {ECO:0000313|EMBL:KNA20590.1};	Thioredoxin/protein disulfide isomerase	GO:0005788,endoplasmic reticulum lumen; GO:0003756,protein disulfide isomerase activity; GO:0045454,cell redox homeostasis; GO:0006457,protein folding; GO:0034976,response to endoplasmic reticulum stress	Thioredoxin
gene-LOC110701964	0.49	0.37	1.06	0	0	0	35	26	75	0	0	0	0.005	-7.718	9.48365e-09	4.16767e-07	down	NW_018744662.1	1771914	1775589	-	LOC110701964	--	--	--	--	--	--	--	--
gene-LOC110701979	13.64	9.11	60.94	8.76	5.97	3.81	410	269	1802	250	192	105	0.268	-1.899	0.00134358	0.0138718	down	NW_018744662.1	1958795	1961797	-	LOC110701979	--	--	protodermal factor 1-like [Chenopodium quinoa]	RecName: Full=Protodermal factor 1; Flags: Precursor;	SubName: Full=Uncharacterized protein {ECO:0000313|EMBL:KMS94996.1};	--	GO:0005576,extracellular region	--
gene-LOC110702007	0.85	0.45	1.18	0.31	0.05	0.04	46	24	63	16	3	2	0.175	-2.516	0.0016354	0.0161354	down	NW_018744662.1	2279902	2284102	+	LOC110702007	--	--	uncharacterized protein LOC110702007 isoform X1 [Chenopodium quinoa]	--	SubName: Full=Uncharacterized protein {ECO:0000313|EMBL:KMS99147.1};	--	GO:0016021,integral component of membrane; GO:0071446,cellular response to salicylic acid stimulus; GO:0031347,regulation of defense response; GO:2000031,regulation of salicylic acid mediated signaling pathway	Ankyrin repeats (many copies)
gene-LOC110702069	51.11	27.15	83.84	27.32	10.92	9.57	2284	1192	3686	1159	522	392	0.329	-1.606	0.000278826	0.00395716	down	NW_018744662.1	3081545	3087217	-	LOC110702069	--	K11294 nucleolin | (RefSeq) nucleolin 1-like (A)	nucleolin 1-like [Chenopodium quinoa]	RecName: Full=Nucleolin 2; AltName: Full=Protein NUCLEOLIN LIKE 2;	SubName: Full=Uncharacterized protein {ECO:0000313|EMBL:KNA22717.1};	Nuclear localization sequence binding protein	GO:0005730,nucleolus; GO:0003723,RNA binding; GO:0006364,rRNA processing	RNA recognition motif. (a.k.a. RRM, RBD, or RNP domain)
gene-LOC110702238	0.21	2.61	3.44	0.19	0.14	0.1	7	87	115	6	5	3	0.075	-3.743	8.37889e-05	0.001449	down	NW_018742393.1	310401	314273	+	LOC110702238	--	K03978 GTP-binding protein | (RefSeq) GTP-binding protein At2g22870-like (A)	GTP-binding protein At2g22870-like [Chenopodium quinoa]	RecName: Full=GTP-binding protein At2g22870; AltName: Full=Protein EMBRYO DEFECTIVE 2001;	SubName: Full=Uncharacterized protein {ECO:0000313|EMBL:KNA21746.1};	Predicted GTPase	GO:0005737,cytoplasm; GO:0005525,GTP binding; GO:0046872,metal ion binding	50S ribosome-binding GTPase
gene-LOC110702251	0.29	0.6	0.13	0	0	0.04	9	18	4	0	0	1	0.035	-4.832	0.00409939	0.0318553	down	NW_018744687.1	8884	11293	-	LOC110702251	--	K03549 KUP system potassium uptake protein | (RefSeq) potassium transporter 19-like (A)	uncharacterized protein LOC110702251 [Chenopodium quinoa]	--	SubName: Full=Uncharacterized protein {ECO:0000313|EMBL:CAN78763.1};	--	--	Domain of unknown function (DUF4218)
gene-LOC110702258	0.15	0.23	0.37	0	0	0	9	14	22	0	0	0	0.014	-6.169	5.49356e-05	0.00101991	down	NW_018744689.1	312830	316626	-	LOC110702258	--	K10638 E3 ubiquitin-protein ligase UHRF1 [EC:2.3.2.27] | (RefSeq) uncharacterized protein LOC113308475 (A)	uncharacterized protein LOC110702258 [Chenopodium quinoa]	RecName: Full=B2 protein;	SubName: Full=Uncharacterized protein {ECO:0000313|EMBL:KNA16471.1};	--	--	Development and cell death domain
gene-LOC110702360	11.86	6.03	15.42	7.19	2.57	1.81	358	179	458	206	83	50	0.378	-1.404	0.00584486	0.0409854	down	NW_018742393.1	604919	610260	-	LOC110702360	--	K09903 uridylate kinase [EC:2.7.4.22] | (RefSeq) uncharacterized protein LOC110702360 (A)	uncharacterized protein LOC110702360 [Chenopodium quinoa]	RecName: Full=Bifunctional aspartokinase/homoserine dehydrogenase 2, chloroplastic; Short=AK-HD 2; Short=AK-HSDH 2; AltName: Full=Beta-aspartyl phosphate homoserine 2; Includes: RecName: Full=Aspartokinase; EC=2.7.2.4; Includes: RecName: Full=Homoserine dehydrogenase; EC=1.1.1.3; Flags: Precursor;	SubName: Full=Uncharacterized protein {ECO:0000313|EMBL:KMT18123.1};	--	GO:0009507,chloroplast; GO:0009570,chloroplast stroma; GO:0004072,aspartate kinase activity; GO:0005524,ATP binding; GO:0004412,homoserine dehydrogenase activity; GO:0050661,NADP binding; GO:0009090,homoserine biosynthetic process; GO:0009089,lysine biosynthetic process via diaminopimelate; GO:0009086,methionine biosynthetic process; GO:0009088,threonine biosynthetic process	Amino acid kinase family
gene-LOC110702388	103.6	76.12	129.22	77.74	26.9	31.69	2236	1614	2744	1593	621	627	0.474	-1.078	0.00481359	0.0356831	down	NW_018742393.1	640411	643183	+	LOC110702388	--	K02934 large subunit ribosomal protein L6e | (RefSeq) 60S ribosomal protein L6-like (A)	60S ribosomal protein L6-like [Chenopodium quinoa]	RecName: Full=60S ribosomal protein L6; AltName: Full=YL16-like;	RecName: Full=60S ribosomal protein L6 {ECO:0000256|RuleBase:RU000662};	60s ribosomal protein L6	GO:0005840,ribosome; GO:0003735,structural constituent of ribosome; GO:0006412,translation	Ribosomal protein L6e
gene-LOC110702407	0.86	0.41	1.27	0.41	0.18	0.24	114	53	166	51	26	29	0.366	-1.451	0.00158738	0.0157784	down	NW_018744693.1	51591	58295	+	LOC110702407	--	K15078 structure-specific endonuclease subunit SLX1 [EC:3.6.1.-] | (RefSeq) putative disease resistance protein RGA1 (A)	putative disease resistance protein RGA1 [Chenopodium quinoa]	RecName: Full=Putative disease resistance protein RGA4; AltName: Full=RGA4-blb;	SubName: Full=Uncharacterized protein {ECO:0000313|EMBL:KNA23085.1};	Apoptotic ATPase	GO:0043531,ADP binding; GO:0005524,ATP binding; GO:0006952,defense response	Leucine-rich repeat
gene-LOC110702461	3.53	2.72	2.97	0.87	0.43	0.55	238	180	197	56	31	34	0.214	-2.228	5.45977e-10	2.97295e-08	down	NW_018744693.1	812437	820731	-	LOC110702461	--	K17679 ATP-dependent RNA helicase MSS116, mitochondrial [EC:3.6.4.13] | (RefSeq) DEAD-box ATP-dependent RNA helicase 31 (A)	DEAD-box ATP-dependent RNA helicase 48-like [Chenopodium quinoa]	RecName: Full=Putative DEAD-box ATP-dependent RNA helicase 33; EC=3.6.4.13;	SubName: Full=Uncharacterized protein {ECO:0000313|EMBL:KNA13451.1};	ATP-dependent RNA helicase pitchoune	GO:0005737,cytoplasm; GO:0005730,nucleolus; GO:0005524,ATP binding; GO:0004004,ATP-dependent RNA helicase activity; GO:0003723,RNA binding; GO:0010501,RNA secondary structure unwinding	DEAD/DEAH box helicase
gene-LOC110702478	29.08	35.9	198.2	26.57	2.33	7.89	559	678	3749	485	48	139	0.162	-2.626	0.00118896	0.012628	down	NW_018744693.1	1078771	1079732	-	LOC110702478	--	K12173 BRCA1-A complex subunit BRE | (RefSeq) BRCA1-A complex subunit BRE-like (A)	alpha-amylase/trypsin inhibitor-like [Chenopodium quinoa]	RecName: Full=Zeamatin; Flags: Precursor;	SubName: Full=Uncharacterized protein {ECO:0000313|EMBL:KNA04280.1};	--	GO:0050832,defense response to fungus; GO:0031640,killing of cells of other organism; GO:0044130,negative regulation of growth of symbiont in host; GO:0051841,positive regulation by host of cytolysis of symbiont cells	Thaumatin family
gene-LOC110702491	54.72	40.6	49.29	30.99	15.02	11.88	889	648	788	478	261	177	0.423	-1.242	0.000722829	0.00853908	down	NW_018744693.1	1262977	1265796	+	LOC110702491	--	K02896 large subunit ribosomal protein L24e | (RefSeq) 60S ribosomal protein L24-like (A)	60S ribosomal protein L24-like [Chenopodium quinoa]	RecName: Full=60S ribosomal protein L24;	SubName: Full=Uncharacterized protein {ECO:0000313|EMBL:KNA23373.1};	60s ribosomal protein L24	GO:0005840,ribosome	Ribosomal protein L24e
gene-LOC110702503	5.77	7.41	7.88	1.69	0.8	2.06	61	77	82	17	9	20	0.232	-2.109	1.55024e-05	0.000337064	down	NW_018744693.1	1514980	1516246	+	LOC110702503	--	--	--	--	--	--	--	--
gene-LOC110702507	0.41	0.25	0.83	0.05	0.04	0.05	18	11	36	2	2	2	0.108	-3.21	0.000384274	0.00511736	down	NW_018744693.1	1601813	1607153	+	LOC110702507	--	--	uncharacterized protein LOC110702507 [Chenopodium quinoa]	--	SubName: Full=Uncharacterized protein {ECO:0000313|EMBL:KNA15962.1};	--	--	--
gene-LOC110702566	7.87	9.98	8.4	2.99	4.14	2.17	158	197	166	57	89	40	0.382	-1.388	0.000649569	0.00785751	down	NW_018744693.1	2434540	2435544	-	LOC110702566	--	--	zinc finger A20 and AN1 domain-containing stress-associated protein 9-like [Chenopodium quinoa]	RecName: Full=Zinc finger A20 and AN1 domain-containing stress-associated protein 1; Short=AtSAP1;	SubName: Full=Uncharacterized protein {ECO:0000313|EMBL:OAY56621.1};	Predicted Zn-finger protein	GO:0003677,DNA binding; GO:0008270,zinc ion binding	A20-like zinc finger
gene-LOC110702662	11.82	6.33	5.22	3.06	2.69	2.9	435	229	189	107	106	98	0.392	-1.351	0.00185286	0.0177194	down	NW_018744693.1	5689336	5700797	-	LOC110702662	--	K13717 OTU domain-containing protein 3 [EC:3.4.19.12] | (RefSeq) Ovarian tumour, otubain (A)	OTU domain-containing protein DDB_G0284757-like [Chenopodium quinoa]	--	SubName: Full=Uncharacterized protein {ECO:0000313|EMBL:KNA08189.1};	OTU (ovarian tumor)-like cysteine protease	--	OTU-like cysteine protease
gene-LOC110702675	3.65	2.64	4.51	0.94	0.5	0.47	273	194	332	67	40	32	0.193	-2.373	2.69051e-13	2.60366e-11	down	NW_018744693.1	6181388	6196558	-	LOC110702675	--	K03655 ATP-dependent DNA helicase RecG [EC:3.6.4.12] | (RefSeq) ATP-dependent DNA helicase homolog RECG, chloroplastic isoform X1 (A)	ATP-dependent DNA helicase At3g02060, chloroplastic isoform X1 [Chenopodium quinoa]	RecName: Full=ATP-dependent DNA helicase At3g02060, chloroplastic; EC=3.6.4.12 {ECO:0000305}; Flags: Precursor;	SubName: Full=Uncharacterized protein {ECO:0000313|EMBL:KJB33194.1};	ATP-dependent RNA helicase	GO:0009507,chloroplast; GO:0005524,ATP binding; GO:0003677,DNA binding; GO:0004386,helicase activity	Helicase conserved C-terminal domain
gene-LOC110702680	230.01	181.37	261.47	154	60.63	53.3	3714	2877	4154	2361	1047	789	0.423	-1.242	0.00125746	0.013183	down	NW_018744693.1	6681260	6683329	-	LOC110702680	--	K02978 small subunit ribosomal protein S27e | (RefSeq) 40S ribosomal protein S27-2-like (A)	40S ribosomal protein S27-2-like [Manihot esculenta]	RecName: Full=40S ribosomal protein S27-2;	RecName: Full=40S ribosomal protein S27 {ECO:0000256|RuleBase:RU000671};	40s ribosomal protein S27	GO:0005618,cell wall; GO:0022626,cytosolic ribosome; GO:0022627,cytosolic small ribosomal subunit; GO:0009506,plasmodesma; GO:0042788,polysomal ribosome; GO:0005840,ribosome; GO:0046872,metal ion binding; GO:0003735,structural constituent of ribosome; GO:0000028,ribosomal small subunit assembly; GO:0006412,translation	Ribosomal protein S27
gene-LOC110702682	4.43	3.79	6.79	0	0	0	114	96	172	0	0	0	0.002	-9.254	7.16894e-14	7.85303e-12	down	NW_018744693.1	6777413	6780740	-	LOC110702682	--	--	--	--	--	--	--	--
gene-LOC110702718	265.81	186.41	274.88	169.49	61.59	63.58	3543	2441	3605	2145	878	777	0.43	-1.218	0.00176432	0.0171269	down	NW_018744697.1	708775	709441	-	LOC110702718	--	K02901 large subunit ribosomal protein L27e | (RefSeq) 60S ribosomal protein L27-2-like (A)	60S ribosomal protein L27-2-like [Chenopodium quinoa]	RecName: Full=60S ribosomal protein L27-2;	RecName: Full=60S ribosomal protein L27 {ECO:0000256|RuleBase:RU000575};	60S ribosomal protein L27	GO:0005829,cytosol; GO:0022625,cytosolic large ribosomal subunit; GO:0022626,cytosolic ribosome; GO:0042788,polysomal ribosome; GO:0003735,structural constituent of ribosome; GO:0006412,translation	Ribosomal L27e protein family
gene-LOC110702735	3.81	1.09	16.39	2.35	1.07	0.47	368	103	1556	215	110	42	0.221	-2.178	0.00561072	0.039769	down	NW_018742393.1	939689	947054	-	LOC110702735	--	K03164 DNA topoisomerase II [EC:5.6.2.2] | (RefSeq) DNA topoisomerase 2-like (A)	DNA topoisomerase 2-like [Chenopodium quinoa]	RecName: Full=DNA topoisomerase 2; EC=5.99.1.3; AltName: Full=DNA topoisomerase II;	RecName: Full=DNA topoisomerase 2 {ECO:0000256|RuleBase:RU362094}; EC=5.99.1.3 {ECO:0000256|RuleBase:RU362094};	DNA topoisomerase type II	GO:0005634,nucleus; GO:0005524,ATP binding; GO:0003677,DNA binding; GO:0003916,DNA topoisomerase activity; GO:0003918,DNA topoisomerase type II (ATP-hydrolyzing) activity; GO:0046872,metal ion binding; GO:0006265,DNA topological change; GO:0044774,mitotic DNA integrity checkpoint; GO:0000712,resolution of meiotic recombination intermediates; GO:0000819,sister chromatid segregation	DNA gyrase/topoisomerase IV, subunit A
gene-LOC110702765	4.68	3.52	7.34	2.93	1.96	1.68	158	117	244	94	71	52	0.472	-1.084	0.00054932	0.00682588	down	NW_018742393.1	961286	966368	+	LOC110702765	--	K00559 sterol 24-C-methyltransferase [EC:2.1.1.41] | (RefSeq) cycloartenol-C-24-methyltransferase-like (A)	cycloartenol-C-24-methyltransferase-like [Chenopodium quinoa]	RecName: Full=Cycloartenol-C-24-methyltransferase; EC=2.1.1.41; AltName: Full=24-sterol C-methyltransferase 1; Short=Sterol C-methyltransferase 1; AltName: Full=Protein CEPHALOPOD; AltName: Full=Protein STEROL METHYLTRANSFERASE 1;	RecName: Full=Methyltransferase {ECO:0000256|RuleBase:RU362025};	SAM-dependent methyltransferases	GO:0005783,endoplasmic reticulum; GO:0009506,plasmodesma; GO:0005773,vacuole; GO:0003838,sterol 24-C-methyltransferase activity; GO:0009793,embryo development ending in seed dormancy; GO:0016126,sterol biosynthetic process	Sterol methyltransferase C-terminal
gene-LOC110702769	3.27	1.91	5.73	2.16	1.36	1.11	186	107	321	117	83	58	0.482	-1.052	0.00696107	0.0465159	down	NW_018744702.1	1257248	1274083	-	LOC110702769	--	K14787 multiple RNA-binding domain-containing protein 1 | (RefSeq) multiple RNA-binding domain-containing protein 1-like (A)	multiple RNA-binding domain-containing protein 1-like [Chenopodium quinoa]	RecName: Full=Polyadenylate-binding protein 8; Short=PABP-8; Short=Poly(A)-binding protein 8;	SubName: Full=Uncharacterized protein {ECO:0000313|EMBL:KNA03603.1}; Flags: Fragment;	RNA-binding protein (RRM superfamily)	GO:0005829,cytosol; GO:0005634,nucleus; GO:0003729,mRNA binding; GO:0006417,regulation of translation; GO:0046686,response to cadmium ion; GO:0016032,viral process	RNA recognition motif. (a.k.a. RRM, RBD, or RNP domain)
gene-LOC110702834	2.3	0.62	2.5	0	0	0	15	4	16	0	0	0	0.018	-5.774	0.000578735	0.00713468	down	NW_018744704.1	5340461	5341276	-	LOC110702834	--	--	--	--	--	--	--	--
gene-LOC110702860	0.37	0.25	0.42	0	0	0	15	10	17	0	0	0	0.015	-6.081	5.92069e-05	0.00108416	down	NW_018744704.1	328508	330862	+	LOC110702860	--	--	--	--	--	--	--	--
gene-LOC110702867	0.83	0.84	1.68	0	0	0	27	27	54	0	0	0	0.006	-7.416	3.3839e-08	1.34185e-06	down	NW_018744704.1	769339	773746	-	LOC110702867	--	K17499 protein phosphatase 1G [EC:3.1.3.16] | (RefSeq) probable protein phosphatase 2C 11 isoform X1 (A)	probable protein phosphatase 2C 11 isoform X1 [Chenopodium quinoa]	RecName: Full=Probable protein phosphatase 2C 11; Short=OsPP2C11; EC=3.1.3.16;	SubName: Full=Uncharacterized protein {ECO:0000313|EMBL:KNA10479.1};	Serine/threonine protein phosphatase	GO:0046872,metal ion binding; GO:0004722,protein serine/threonine phosphatase activity	Protein phosphatase 2C
gene-LOC110702885	2.14	1.78	2.75	0	0	0	87	71	110	0	0	0	0.002	-8.758	2.15879e-12	1.82443e-10	down	NW_018744704.1	1557572	1560504	-	LOC110702885	--	--	--	--	--	--	--	--
gene-LOC110702905	10.6	10.79	14.42	4.34	1.43	2.31	180	180	241	70	26	36	0.241	-2.052	2.90324e-07	9.65697e-06	down	NW_018742204.1	3967724	3969722	+	LOC110702905	--	K02951 small subunit ribosomal protein S12e | (RefSeq) 40S ribosomal protein S12-like (A)	40S ribosomal protein S12-like [Chenopodium quinoa]	RecName: Full=40S ribosomal protein S12;	RecName: Full=40S ribosomal protein S12 {ECO:0000256|RuleBase:RU000670};	40S ribosomal protein S12	GO:0005840,ribosome; GO:0003735,structural constituent of ribosome; GO:0006412,translation	Ribosomal protein L7Ae/L30e/S12e/Gadd45 family
gene-LOC110702909	15.74	14.62	10.97	8.69	4.05	5.4	229	209	157	120	63	72	0.455	-1.137	0.00503598	0.0368057	down	NW_018742393.1	1110678	1113188	-	LOC110702909	--	--	uncharacterized protein LOC110702909 [Chenopodium quinoa]	--	SubName: Full=Uncharacterized protein {ECO:0000313|EMBL:KNA15798.1};	--	--	Protein of unknown function (DUF2462)
gene-LOC110702939	5.69	2.09	7.43	2.83	0.72	0.89	252	91	324	119	34	36	0.32	-1.643	0.00445542	0.0336882	down	NW_018742393.1	1139416	1146536	-	LOC110702939	--	K16297 serine carboxypeptidase-like clade II [EC:3.4.16.-] | (RefSeq) serine carboxypeptidase-like 40 (A)	serine carboxypeptidase-like 40 [Chenopodium quinoa]	RecName: Full=Serine carboxypeptidase-like 40; EC=3.4.16.-; Flags: Precursor;	RecName: Full=Carboxypeptidase {ECO:0000256|RuleBase:RU361156}; EC=3.4.16.- {ECO:0000256|RuleBase:RU361156};	Serine carboxypeptidases (lysosomal cathepsin A)	GO:0005576,extracellular region; GO:0004185,serine-type carboxypeptidase activity; GO:0051603,proteolysis involved in cellular protein catabolic process	Serine carboxypeptidase
gene-LOC110702959	27.59	19.93	40.75	17.56	8.03	7.94	1137	807	1652	687	354	300	0.417	-1.262	0.000178352	0.00273937	down	NW_018744704.1	5574511	5576572	-	LOC110702959	--	K09496 T-complex protein 1 subunit delta | (RefSeq) T-complex protein 1 subunit delta-like (A)	T-complex protein 1 subunit delta-like [Chenopodium quinoa]	RecName: Full=T-complex protein 1 subunit delta {ECO:0000303|PubMed:11599560}; Short=TCP-1-delta {ECO:0000303|PubMed:11599560}; AltName: Full=CCT-delta {ECO:0000303|PubMed:11599560}; AltName: Full=Chaperonin CCT4 {ECO:0000305};	RecName: Full=T-complex protein 1 subunit delta {ECO:0000256|RuleBase:RU004192};	Chaperonin complex component, TCP-1 delta subunit (CCT4)	GO:0005832,chaperonin-containing T-complex; GO:0005829,cytosol; GO:0005524,ATP binding; GO:0044183,protein binding involved in protein folding; GO:0051082,unfolded protein binding; GO:0006458,'de novo' protein folding; GO:0061077,chaperone-mediated protein folding; GO:0046686,response to cadmium ion	TCP-1/cpn60 chaperonin family
gene-LOC110702961	4.35	5.3	3.05	1.13	1.2	1.64	61	73	42	15	18	21	0.328	-1.608	0.00285947	0.0245265	down	NW_018744704.1	5849128	5851377	+	LOC110702961	--	--	--	--	--	--	--	--
gene-LOC110702995	18.22	14.11	14.48	6.08	1.26	2.17	284	216	222	90	21	31	0.209	-2.261	2.53446e-05	0.000517959	down	NW_018742204.1	4085034	4086791	+	LOC110702995	--	K02951 small subunit ribosomal protein S12e | (RefSeq) 40S ribosomal protein S12-like (A)	40S ribosomal protein S12-like [Chenopodium quinoa]	RecName: Full=40S ribosomal protein S12;	RecName: Full=40S ribosomal protein S12 {ECO:0000256|RuleBase:RU000670};	40S ribosomal protein S12	GO:0005840,ribosome; GO:0003735,structural constituent of ribosome; GO:0006412,translation	Ribosomal protein L7Ae/L30e/S12e/Gadd45 family
gene-LOC110703059	5.7	3.18	7.92	2.42	1.63	2.02	265	145	362	107	81	86	0.407	-1.297	4.78383e-05	0.000903414	down	NW_018742393.1	1282656	1284981	+	LOC110703059	--	K17710 pentatricopeptide repeat domain-containing protein 1 | (RefSeq) putative pentatricopeptide repeat-containing protein At2g02150 (A)	pentatricopeptide repeat-containing protein At3g02490, mitochondrial-like [Chenopodium quinoa]	RecName: Full=Pentatricopeptide repeat-containing protein At3g02490, mitochondrial; Flags: Precursor;	SubName: Full=Uncharacterized protein {ECO:0000313|EMBL:KNA23808.1};	FOG: PPR repeat	GO:0005739,mitochondrion; GO:0004519,endonuclease activity; GO:0003723,RNA binding; GO:0009451,RNA modification; GO:0008380,RNA splicing	PPR repeat family
gene-LOC110703085	0.5	0.4	0.37	0.07	0.1	0.16	47	37	34	6	10	14	0.281	-1.83	0.00237324	0.0213306	down	NW_018742393.1	1301209	1309791	-	LOC110703085	--	K11843 ubiquitin carboxyl-terminal hydrolase 14 [EC:3.4.19.12] | (RefSeq) FBD-associated F-box protein At4g10400-like (A)	F-box/FBD/LRR-repeat protein At1g13570-like [Chenopodium quinoa]	RecName: Full=F-box/FBD/LRR-repeat protein At1g13570;	SubName: Full=Uncharacterized protein {ECO:0000313|EMBL:KNA08993.1};	--	--	--
gene-LOC110703125	0.87	0.91	0.75	0	0	0	33	34	28	0	0	0	0.006	-7.316	7.91491e-08	2.93598e-06	down	NW_018744718.1	2671362	2673263	+	LOC110703125	--	K10268 F-box and leucine-rich repeat protein 2/20 | (RefSeq) F-box/LRR-repeat protein 3-like (A)	F-box/LRR-repeat protein 3-like [Chenopodium quinoa]	RecName: Full=EIN3-binding F-box protein 1; AltName: Full=F-box/LRR-repeat protein 6;	SubName: Full=Uncharacterized protein {ECO:0000313|EMBL:KNA05739.1};	Leucine rich repeat proteins, some proteins contain F-box	GO:0005634,nucleus; GO:0009873,ethylene-activated signaling pathway; GO:0010105,negative regulation of ethylene-activated signaling pathway; GO:0016567,protein ubiquitination; GO:0009723,response to ethylene; GO:0006511,ubiquitin-dependent protein catabolic process	F-box-like
gene-LOC110703146	34.06	91.63	11.66	6.52	4.34	19.12	484	1279	163	88	66	249	0.216	-2.214	0.0072491	0.0479686	down	NW_018744718.1	144471	145459	-	LOC110703146	--	K14771 U3 small nucleolar RNA-associated protein 19 | (RefSeq) uncharacterized LOC104415908 (A)	EG45-like domain containing protein [Chenopodium quinoa]	RecName: Full=EG45-like domain containing protein; AltName: Full=Blight-associated protein p12; AltName: Full=Plant natriuretic peptide; Short=PNP; Flags: Precursor;	SubName: Full=Uncharacterized protein {ECO:0000313|EMBL:KNA16851.1};	--	GO:0005576,extracellular region	Lytic transglycolase
gene-LOC110703210	6.34	2.36	15.55	3.19	0.58	0.68	153	56	369	73	15	15	0.208	-2.263	0.00226902	0.0206329	down	NW_018744718.1	409549	411883	+	LOC110703210	--	--	prostatic spermine-binding protein-like [Chenopodium quinoa]	--	SubName: Full=Uncharacterized protein {ECO:0000313|EMBL:KNA17662.1};	--	--	--
gene-LOC110703238	20.59	24.61	25.52	14.66	8.85	8.45	574	674	700	388	264	216	0.481	-1.056	0.000201067	0.00302605	down	NW_018744718.1	824366	828052	+	LOC110703238	--	--	LOW QUALITY PROTEIN: phosphatidylcholine:diacylglycerol cholinephosphotransferase 1-like [Chenopodium quinoa]	RecName: Full=Phosphatidylcholine:diacylglycerol cholinephosphotransferase 1; Short=AtPDCT1; EC=2.7.8.-; AltName: Full=Protein REDUCED OLEATE DESATURATION 1;	SubName: Full=Uncharacterized protein {ECO:0000313|EMBL:KNA20900.1};	--	GO:0016021,integral component of membrane; GO:0004142,diacylglycerol cholinephosphotransferase activity; GO:0046470,phosphatidylcholine metabolic process	PAP2 superfamily
gene-LOC110703258	7.47	5.62	8.9	3.58	1.69	2.41	169	125	198	77	41	50	0.38	-1.396	2.02314e-05	0.000427445	down	NW_018744718.1	1095132	1098183	+	LOC110703258	--	K08234 glyoxylase I family protein | (RefSeq) uncharacterized protein LOC110020254 (A)	uncharacterized protein LOC110703258 [Chenopodium quinoa]	--	SubName: Full=Uncharacterized protein {ECO:0000313|EMBL:KNA15128.1};	--	--	Glyoxalase/Bleomycin resistance protein/Dioxygenase superfamily
gene-LOC110703295	29.19	17.65	53.67	15.46	6.91	9.28	549	326	993	276	139	160	0.356	-1.489	0.000109685	0.00181531	down	NW_018744718.1	1527382	1530877	+	LOC110703295	--	K11251 histone H2A | (RefSeq) probable histone H2A variant 3 (A)	probable histone H2A variant 3 [Chenopodium quinoa]	RecName: Full=Probable histone H2A variant 3; AltName: Full=H2A.F/Z 3; AltName: Full=HTA9;	RecName: Full=Histone H2A {ECO:0000256|RuleBase:RU003767};	Histone 2A	GO:0000790,nuclear chromatin; GO:0000786,nucleosome; GO:0005773,vacuole; GO:0003677,DNA binding; GO:0046982,protein heterodimerization activity; GO:0006342,chromatin silencing; GO:0042742,defense response to bacterium; GO:0009266,response to temperature stimulus	Core histone H2A/H2B/H3/H4
gene-LOC110703302	1.98	0.48	7.05	0.71	0.54	0.38	137	33	481	47	40	24	0.211	-2.243	0.00219175	0.020126	down	NW_018744718.1	1633545	1638214	-	LOC110703302	--	--	uncharacterized protein LOC110703302 [Chenopodium quinoa]	--	SubName: Full=Uncharacterized protein {ECO:0000313|EMBL:KNA18655.1};	--	--	--
gene-LOC110703360	5.75	4.32	8.8	1.86	1.66	1.04	302	223	455	93	93	50	0.271	-1.883	1.16457e-09	6.00017e-08	down	NW_018742393.1	1754189	1760021	+	LOC110703360	--	K23280 rhamnogalacturonan I rhamnosyltransferase [EC:2.4.1.351] | (RefSeq) uncharacterized protein At1g04910-like (A)	uncharacterized protein At1g04910-like isoform X1 [Chenopodium quinoa]	RecName: Full=O-fucosyltransferase 27 {ECO:0000305}; Short=O-FucT-27 {ECO:0000305}; EC=2.4.1.- {ECO:0000305}; AltName: Full=O-fucosyltransferase family protein {ECO:0000312|EMBL:ARJ31433.1};	SubName: Full=Uncharacterized protein {ECO:0000313|EMBL:KNA06452.1};	--	GO:0005768,endosome; GO:0005794,Golgi apparatus; GO:0016021,integral component of membrane; GO:0005802,trans-Golgi network; GO:0016757,transferase activity, transferring glycosyl groups; GO:0006004,fucose metabolic process; GO:0006486,protein glycosylation	GDP-fucose protein O-fucosyltransferase
gene-LOC110703361	114.43	80.96	115.19	72.94	28.6	31.4	1459	1014	1445	883	390	367	0.455	-1.136	0.00171754	0.01676	down	NW_018744718.1	2440738	2442100	+	LOC110703361	--	K02922 large subunit ribosomal protein L37e | (RefSeq) 60S ribosomal protein L37-3 (A)	60S ribosomal protein L37-3 [Chenopodium quinoa]	RecName: Full=60S ribosomal protein L37-3;	RecName: Full=Ribosomal protein L37 {ECO:0000256|RuleBase:RU000576};	60S ribosomal protein L37	GO:0022625,cytosolic large ribosomal subunit; GO:0046872,metal ion binding; GO:0003723,RNA binding; GO:0019843,rRNA binding; GO:0003735,structural constituent of ribosome; GO:0006412,translation	Ribosomal protein L37e
gene-LOC110703389	1.09	1.15	0.43	0	0.04	0.19	49	51	19	0	2	8	0.092	-3.44	0.00121392	0.0128528	down	NW_018744718.1	2815358	2821494	-	LOC110703389	--	--	uncharacterized protein LOC110703389 [Chenopodium quinoa]	--	SubName: Full=Uncharacterized protein {ECO:0000313|EMBL:KNA22728.1};	--	--	--
gene-LOC110703402	0.79	0.94	2.02	0.02	0	0	42	49	105	1	0	0	0.006	-7.302	1.92007e-08	7.96915e-07	down	NW_018744718.1	2968574	2974141	-	LOC110703402	--	K14857 AdoMet-dependent rRNA methyltransferase SPB1 [EC:2.1.1.-] | (RefSeq) putative rRNA methyltransferase (A)	uncharacterized protein LOC110703402 [Chenopodium quinoa]	--	SubName: Full=Uncharacterized protein {ECO:0000313|EMBL:CCA65997.1};	FOG: Reverse transcriptase	GO:0003676,nucleic acid binding; GO:0004523,RNA-DNA hybrid ribonuclease activity	--
gene-LOC110703430	26.88	13.78	39.38	8.61	5.28	8.57	671	338	967	204	141	196	0.319	-1.649	2.5752e-06	6.82514e-05	down	NW_018744718.1	3246099	3250010	+	LOC110703430	--	K10949 ER lumen protein retaining receptor | (RefSeq) putative ER lumen protein-retaining receptor C28H8.4 (A)	putative ER lumen protein-retaining receptor C28H8.4 [Chenopodium quinoa]	RecName: Full=ER lumen protein-retaining receptor A; AltName: Full=HDEL receptor;	SubName: Full=Uncharacterized protein {ECO:0000313|EMBL:KNA20702.1};	ER lumen protein retaining receptor	GO:0005801,cis-Golgi network; GO:0005783,endoplasmic reticulum; GO:0005789,endoplasmic reticulum membrane; GO:0005794,Golgi apparatus; GO:0016021,integral component of membrane; GO:0046923,ER retention sequence binding; GO:0006621,protein retention in ER lumen; GO:0015031,protein transport; GO:0016192,vesicle-mediated transport	ER lumen protein retaining receptor
gene-LOC110703464	5.46	6.71	5.5	4.22	2.01	1.47	365	441	362	268	144	90	0.45	-1.151	0.0066662	0.0451117	down	NW_018744718.1	3700882	3705144	-	LOC110703464	--	K05387 glutamate receptor, ionotropic, plant | (RefSeq) glutamate receptor 3.6-like (A)	glutamate receptor 3.6-like [Chenopodium quinoa]	RecName: Full=Glutamate receptor 3.6; AltName: Full=Ligand-gated ion channel 3.6; Flags: Precursor;	RecName: Full=Glutamate receptor {ECO:0000256|PIRNR:PIRNR037090};	Glutamate-gated kainate-type ion channel receptor subunit GluR5 and related subunits	GO:0016021,integral component of membrane; GO:0005622,intracellular; GO:0005886,plasma membrane; GO:0005262,calcium channel activity; GO:0008066,glutamate receptor activity; GO:0004970,ionotropic glutamate receptor activity; GO:0006816,calcium ion transport; GO:0019722,calcium-mediated signaling; GO:0007267,cell-cell signaling; GO:0071230,cellular response to amino acid stimulus; GO:0009864,induc…	Receptor family ligand binding region
gene-LOC110703493	7.64	9.97	6.71	1.28	1.23	0.77	163	209	141	26	28	15	0.142	-2.819	2.56681e-10	1.50519e-08	down	NW_018742393.1	1879315	1882609	-	LOC110703493	--	K11649 SWI/SNF related-matrix-associated actin-dependent regulator of chromatin subfamily C | (RefSeq) CHB3501; predicted protein (A)	uncharacterized protein LOC110703493 [Chenopodium quinoa]	--	SubName: Full=Uncharacterized protein {ECO:0000313|EMBL:KNA20607.1};	--	GO:0015035,protein disulfide oxidoreductase activity	DSBA-like thioredoxin domain
gene-LOC110703516	14.83	8.2	12.97	2.95	2.07	6.33	784	426	675	148	117	307	0.35	-1.515	0.00137455	0.0141049	down	NW_018744722.1	207522	233291	-	LOC110703516	--	K16900 two pore calcium channel protein, plant | (RefSeq) LOW QUALITY PROTEIN: two pore calcium channel protein 1B-like (A)	LOW QUALITY PROTEIN: two pore calcium channel protein 1B-like [Chenopodium quinoa]	RecName: Full=Two pore calcium channel protein 1A; AltName: Full=Voltage-dependent calcium channel protein TPC1A; Short=NtTPC1A;	SubName: Full=Uncharacterized protein {ECO:0000313|EMBL:KNA19477.1};	Voltage-gated Ca2+ channels, alpha1 subunits	GO:0016021,integral component of membrane; GO:0005509,calcium ion binding; GO:0005245,voltage-gated calcium channel activity; GO:0006952,defense response; GO:0034765,regulation of ion transmembrane transport	Ion transport protein
gene-LOC110703583	6.87	26.42	4.71	1.37	1.36	0.74	132	499	89	25	28	13	0.089	-3.488	3.82028e-06	9.72469e-05	down	NW_018744745.1	7782	9391	-	LOC110703583	--	K03094 S-phase kinase-associated protein 1 | (RefSeq) SKP1-like protein 1A (A)	SKP1-like protein 1A [Chenopodium quinoa]	RecName: Full=SKP1-like protein 4; Short=AtSK4;	SubName: Full=SKP1 component {ECO:0000313|EMBL:OMO97849.1};	SCF ubiquitin ligase, Skp1 component	GO:0005737,cytoplasm; GO:0005730,nucleolus; GO:0005634,nucleus; GO:0019005,SCF ubiquitin ligase complex; GO:0016567,protein ubiquitination; GO:0006511,ubiquitin-dependent protein catabolic process	Skp1 family, dimerisation domain
gene-LOC110703634	2.23	2.01	3.06	0.2	0	0	150	133	203	13	0	0	0.028	-5.166	0.00361674	0.0290349	down	NW_018744745.1	1445807	1453066	+	LOC110703634	--	--	--	--	--	--	--	--
gene-LOC110703637	3.21	3.7	6	1.03	0.44	1.62	82	93	151	25	12	38	0.266	-1.912	0.000214614	0.003199	down	NW_018744745.1	1487566	1488935	+	LOC110703637	--	--	--	--	--	--	--	--
gene-LOC110703641	6.75	4.79	8.04	3.37	2.36	2.96	139	97	163	66	52	56	0.49	-1.03	0.000346873	0.00473925	down	NW_018744745.1	1539643	1542082	+	LOC110703641	--	K17435 large subunit ribosomal protein L54 | (RefSeq) 54S ribosomal protein L37, mitochondrial-like (A)	54S ribosomal protein L37, mitochondrial-like [Chenopodium quinoa]	--	SubName: Full=Uncharacterized protein {ECO:0000313|EMBL:KNA02877.1}; Flags: Fragment;	Mitochondrial/chloroplast ribosomal protein L54/L37	--	Mitochondrial ribosomal protein L37
gene-LOC110703682	0.09	0.2	0.16	0	0	0	4	9	7	0	0	0	0.03	-5.07	0.00593081	0.0414012	down	NW_018742204.1	4595494	4598486	-	LOC110703682	--	K00384 thioredoxin reductase (NADPH) [EC:1.8.1.9] | (RefSeq) thioredoxin reductase 2-like (A)	uncharacterized protein LOC110703682 [Chenopodium quinoa]	RecName: Full=Glutathione S-transferase T3; Short=AtGSTT3; EC=2.5.1.18; AltName: Full=GST class-theta member 3; AltName: Full=Glutathione S-transferase 10C;	SubName: Full=Uncharacterized protein {ECO:0000313|EnsemblPlants:Bo5g027110.1};	--	GO:0005737,cytoplasm; GO:0005634,nucleus; GO:0004364,glutathione transferase activity; GO:0006749,glutathione metabolic process; GO:0009407,toxin catabolic process	--
gene-LOC110703733	28.52	20.92	30.19	18.64	8.05	7.34	530	382	552	329	160	125	0.456	-1.134	0.00206782	0.0192526	down	NW_018744757.1	1021117	1024498	+	LOC110703733	--	--	uncharacterized protein LOC110703733 [Chenopodium quinoa]	--	SubName: Full=Uncharacterized protein {ECO:0000313|EMBL:KNA05005.1};	--	--	Protein of unknown function (DUF2423)
gene-LOC110703744	1.39	0.96	1.67	0	0	0	65	44	77	0	0	0	0.003	-8.224	1.11668e-10	6.92901e-09	down	NW_018744757.1	2257003	2266685	-	LOC110703744	--	--	uncharacterized protein LOC110703744 isoform X1 [Chenopodium quinoa]	--	SubName: Full=Uncharacterized protein {ECO:0000313|EMBL:KNA15125.1};	--	--	Plant transposase (Ptta/En/Spm family)
gene-LOC110703817	2.91	2.05	5.68	0.07	0.03	0.01	217	150	417	5	2	1	0.012	-6.409	1.43148e-22	5.51252e-20	down	NW_018744784.1	250625	260353	+	LOC110703817	--	--	--	--	--	--	--	--
gene-LOC110703820	1.85	5.23	1.97	0.12	0.03	0.03	66	183	69	4	1	1	0.019	-5.716	2.88777e-10	1.68021e-08	down	NW_018744784.1	282779	285610	-	LOC110703820	--	K21435 ankyrin repeat domain-containing protein 6 | (RefSeq) mucin-17-like (A)	ankyrin repeat-containing protein NPR4-like [Chenopodium quinoa]	RecName: Full=Ankyrin repeat-containing protein BDA1 {ECO:0000305}; AltName: Full=Protein BIAN DA 1 {ECO:0000303|PubMed:22740615};	SubName: Full=Uncharacterized protein {ECO:0000313|EMBL:KNA11865.1};	FOG: Ankyrin repeat	GO:0016021,integral component of membrane; GO:0005886,plasma membrane; GO:0045087,innate immune response; GO:0009751,response to salicylic acid	Ankyrin repeats (3 copies)
gene-LOC110703841	2.05	2.55	2.32	0	0	0.08	27	33	30	0	0	1	0.013	-6.266	3.23636e-06	8.3546e-05	down	NW_018744790.1	1374437	1375190	+	LOC110703841	--	--	--	--	--	--	--	--
gene-LOC110703849	18.27	19.08	22.38	13.52	4.38	6.54	195	200	235	137	50	64	0.432	-1.212	0.00337597	0.0276305	down	NW_018744790.1	2882290	2882823	+	LOC110703849	--	K11094 U2 small nuclear ribonucleoprotein B'' | (RefSeq) U2 small nuclear ribonucleoprotein B''-like isoform X1 (A)	uncharacterized protein LOC110703849 [Chenopodium quinoa]	--	SubName: Full=Uncharacterized protein {ECO:0000313|EMBL:KDP22604.1};	--	GO:0016021,integral component of membrane	Protein of unknown function (DUF3339)
gene-LOC110703895	1.91	1.75	1.84	0.2	0.27	0.21	20	18	19	2	3	2	0.134	-2.894	0.000552521	0.00685904	down	NW_018744790.1	109525	110304	+	LOC110703895	--	--	--	--	--	--	--	--
gene-LOC110703901	9.83	8.86	12.71	4.16	4.38	4.78	323	286	411	130	154	144	0.471	-1.087	2.38943e-06	6.3799e-05	down	NW_018742393.1	2448739	2455130	-	LOC110703901	--	K22836 1,3-beta-glucanosyltransferase GAS5 [EC:2.4.1.-] | (RefSeq) 1,3-beta-glucanosyltransferase gel1-like (A)	EEF1A lysine methyltransferase 2-like [Chenopodium quinoa]	--	RecName: Full=Protein-lysine N-methyltransferase SOVF_132040 {ECO:0000256|HAMAP-Rule:MF_03188}; EC=2.1.1.- {ECO:0000256|HAMAP-Rule:MF_03188};	Methyltransferases	GO:0005737,cytoplasm; GO:0016279,protein-lysine N-methyltransferase activity	Methyltransferase domain
gene-LOC110703910	6.1	14.06	9.18	2.75	1.09	1.23	152	344	225	65	29	28	0.176	-2.505	1.39744e-06	3.99692e-05	down	NW_018742393.1	2458417	2459662	-	LOC110703910	--	K03327 multidrug resistance protein, MATE family | (RefSeq) protein DETOXIFICATION 14-like (A)	uncharacterized protein LOC110703910 [Chenopodium quinoa]	--	SubName: Full=Uncharacterized protein {ECO:0000313|EMBL:KNA11767.1};	--	--	Domain of unknown function (DUF4228)
[truncated: 3,796 more rows]
