# Supplementary material for: Elucidating the Differentiation Synthesis Mechanisms of Differently Colored Resistance Quinoa Seedings Using Metabolite Profiling and Transcriptome Analysis
Source: Metabolites. 2023 Oct 10;13(10):1065. doi: 10.3390/metabo13101065 (PMC10609267; doi:10.3390/metabo13101065)
Supplement: Supplementary file 1 [file metabolites-13-01065-s001.zip › Table S17.xlsx]

## Sheet: Sheet1
Table S17 Number of differential genes in R-RvsR-B
ID	R-B1_fpkm	R-B2_fpkm	R-B3_fpkm	R-R1_fpkm	R-R2_fpkm	R-R3_fpkm	R-B1_count	R-B2_count	R-B3_count	R-R1_count	R-R2_count	R-R3_count	FoldChange	log2FoldChange	pvalue	padj	regulated	chr	start	end	strand	gene_name	gene_description	KEGG	NR	Swissprot	Tremble	KOG	GO	Pfam
gene-CDC77_pgt004	11.71	8.54	5.06	0.57	0	0	21	15	8	1	0	0	44.345	5.471	0.000221856	0.00415963	up	NC_034949.1	7750	7837	-	trnS-GCU	--	--	--	--	--	--	--	--
gene-LOC110681619	6.34	3.59	9.97	0.9	1.16	3.19	130	72	180	18	23	63	4.325	2.113	0.000152263	0.00301071	up	NW_018742244.1	2710033	2711038	-	LOC110681619	--	K13993 HSP20 family protein | (RefSeq) uncharacterized protein LOC110681619 (A)	uncharacterized protein LOC110681619 [Chenopodium quinoa]	RecName: Full=14.7 kDa heat shock protein; Short=AtHsp14.7;	SubName: Full=Uncharacterized protein {ECO:0000313|EMBL:CDP09952.1};	--	GO:0005737,cytoplasm	Hsp20/alpha crystallin family
gene-LOC110681662	1	0.74	0.84	0	0	0	62	45	46	0	0	0	302.022	8.239	1.99466e-10	1.4735e-08	up	NW_018743572.1	530480	539094	+	LOC110681662	--	--	--	--	--	--	--	--
gene-LOC110681665	0.67	1.06	1.56	0	0	0	16	25	33	0	0	0	144.635	7.176	2.68332e-07	1.10615e-05	up	NW_018743572.1	582698	588769	+	LOC110681665	--	--	--	--	--	--	--	--
gene-LOC110681692	6.4	11.67	4.95	2.8	1.98	4	154	275	105	66	46	93	2.824	1.498	0.000134487	0.00270409	up	NW_018742244.1	2783509	2785966	-	LOC110681692	--	K17744 L-galactose dehydrogenase [EC:1.1.1.316] | (RefSeq) L-galactose dehydrogenase-like (A)	L-galactose dehydrogenase-like [Chenopodium quinoa]	RecName: Full=L-galactose dehydrogenase; Short=At-GalDH; Short=L-GalDH; EC=1.1.1.316;	SubName: Full=Uncharacterized protein {ECO:0000313|EMBL:KNA10025.1};	Predicted oxidoreductase	GO:0005829,cytosol; GO:0010349,L-galactose dehydrogenase activity; GO:0006012,galactose metabolic process; GO:0019853,L-ascorbic acid biosynthetic process	Aldo/keto reductase family
gene-LOC110681724	15.19	27.82	17.28	0.14	0	0.23	545	977	546	5	0	8	174.989	7.451	1.10793e-43	3.14788e-40	up	NW_018743574.1	8205098	8208856	-	LOC110681724	--	K13422 transcription factor MYC2 | (RefSeq) transcription factor MYC3 (A)	transcription factor bHLH18-like [Chenopodium quinoa]	RecName: Full=Transcription factor NAI1; AltName: Full=Basic helix-loop-helix protein 20; Short=AtbHLH20; Short=bHLH 20; AltName: Full=Transcription factor EN 27; AltName: Full=bHLH transcription factor bHLH020;	SubName: Full=Uncharacterized protein {ECO:0000313|EMBL:KMS95692.1};	--	GO:0005634,nucleus; GO:0003677,DNA binding; GO:0003700,DNA-binding transcription factor activity; GO:0046983,protein dimerization activity; GO:0007029,endoplasmic reticulum organization; GO:0006355,regulation of transcription, DNA-templated; GO:0006351,transcription, DNA-templated	Helix-loop-helix DNA-binding domain
gene-LOC110681742	0.24	0.43	0.36	0.04	0.04	0.14	18	32	24	3	3	10	5.182	2.373	0.000691501	0.0106555	up	NW_018743574.1	1034013	1037765	+	LOC110681742	--	K15078 structure-specific endonuclease subunit SLX1 [EC:3.6.1.-] | (RefSeq) putative disease resistance protein RGA3 (A)	putative disease resistance protein RGA3 [Chenopodium quinoa]	RecName: Full=Putative disease resistance protein RGA1; AltName: Full=RGA3-blb;	SubName: Full=Uncharacterized protein {ECO:0000313|EMBL:KNA17446.1}; Flags: Fragment;	Apoptotic ATPase	GO:0043531,ADP binding; GO:0005524,ATP binding; GO:0006952,defense response	NB-ARC domain
gene-LOC110681777	1.64	1.48	2.13	0.56	0.66	0.57	78	69	89	26	30	26	3.091	1.628	6.3013e-05	0.00140208	up	NW_018742244.1	2853456	2857876	-	LOC110681777	--	K15078 structure-specific endonuclease subunit SLX1 [EC:3.6.1.-] | (RefSeq) putative disease resistance protein RGA3 (A)	putative disease resistance protein RGA3 [Chenopodium quinoa]	RecName: Full=Putative disease resistance protein RGA3; AltName: Full=Blight resistance protein B149; AltName: Full=RGA1-blb;	SubName: Full=disease resistance protein RGA2-like isoform X2 {ECO:0000313|RefSeq:XP_018825449.1};	Apoptotic ATPase	GO:0043531,ADP binding; GO:0005524,ATP binding; GO:0006952,defense response	NB-ARC domain
gene-LOC110681828	0.65	0.91	0.37	0	0.02	0.1	40	55	20	0	1	6	18.742	4.228	4.77922e-06	0.000146009	up	NW_018743574.1	595154	601012	+	LOC110681828	--	K17609 nucleoredoxin [EC:1.8.1.8] | (RefSeq) hypothetical protein (A)	U-box domain-containing protein 33-like isoform X1 [Chenopodium quinoa]	RecName: Full=U-box domain-containing protein 33; AltName: Full=Plant U-box protein 33; Includes: RecName: Full=E3 ubiquitin ligase; EC=2.3.2.27; AltName: Full=RING-type E3 ubiquitin transferase {ECO:0000305}; Includes: RecName: Full=Serine/threonine-protein kinase; EC=2.7.11.-;	SubName: Full=Uncharacterized protein {ECO:0000313|EMBL:KNA19459.1};	--	GO:0005524,ATP binding; GO:0004674,protein serine/threonine kinase activity; GO:0004842,ubiquitin-protein transferase activity	Protein tyrosine kinase
gene-LOC110681829	0.52	0.53	0.36	0	0	0.11	15	15	9	0	0	3	15.2	3.926	0.00214911	0.0262847	up	NW_018743574.1	592337	595439	+	LOC110681829	--	K00924 kinase [EC:2.7.1.-] | (RefSeq) hypothetical protein (A)	U-box domain-containing protein 33-like isoform X1 [Chenopodium quinoa]	RecName: Full=U-box domain-containing protein 33; AltName: Full=Plant U-box protein 33; Includes: RecName: Full=E3 ubiquitin ligase; EC=2.3.2.27; AltName: Full=RING-type E3 ubiquitin transferase {ECO:0000305}; Includes: RecName: Full=Serine/threonine-protein kinase; EC=2.7.11.-;	SubName: Full=Uncharacterized protein {ECO:0000313|EMBL:KNA19460.1};	--	GO:0005524,ATP binding; GO:0004674,protein serine/threonine kinase activity; GO:0004842,ubiquitin-protein transferase activity	Protein tyrosine kinase
gene-LOC110681832	1.84	0.05	0.89	0.02	0.05	0	75	2	32	1	2	0	38.829	5.279	0.000212762	0.0040218	up	NW_018743574.1	647052	655910	+	LOC110681832	--	K03301 ATP:ADP antiporter, AAA family | (RefSeq) uncharacterized protein LOC110681832 (A)	uncharacterized protein LOC110681832 [Chenopodium quinoa]	--	RecName: Full=ADP,ATP carrier protein {ECO:0000256|RuleBase:RU363121};	--	GO:0031969,chloroplast membrane; GO:0016021,integral component of membrane; GO:0005524,ATP binding; GO:0005471,ATP:ADP antiporter activity	TLC ATP/ADP transporter
gene-LOC110681865	0.21	0.34	0.36	0.06	0.02	0.1	18	28	27	5	2	8	5.439	2.443	0.000374612	0.00641478	up	NW_018743574.1	992185	998460	+	LOC110681865	--	K13457 disease resistance protein RPM1 | (RefSeq) disease resistance protein RPM1 (A)	disease resistance protein RPP8-like [Chenopodium quinoa]	RecName: Full=Probable disease resistance protein At1g58390;	SubName: Full=Uncharacterized protein {ECO:0000313|EMBL:KNA17447.1};	Apoptotic ATPase	GO:0005886,plasma membrane; GO:0043531,ADP binding; GO:0005524,ATP binding; GO:0006952,defense response; GO:0007165,signal transduction	NB-ARC domain
gene-LOC110681889	0.4	0.85	0.54	0.02	0.02	0.16	21	44	25	1	1	8	10.278	3.362	7.00706e-05	0.00154239	up	NW_018743574.1	1306514	1314430	-	LOC110681889	--	--	--	--	--	--	--	--
gene-LOC110681891	6.08	4.29	5.81	2.17	2.49	1.93	291	201	245	102	115	89	2.565	1.359	0.000258686	0.00472076	up	NW_018743574.1	1319537	1323612	-	LOC110681891	--	--	--	--	--	--	--	--
gene-LOC110681893	2.48	2.61	1.27	0.46	0.5	1.05	93	96	42	17	18	38	3.517	1.814	0.000207506	0.0039325	up	NW_018743574.1	1329906	1333080	+	LOC110681893	--	K01580 glutamate decarboxylase [EC:4.1.1.15] | (RefSeq) glutamate decarboxylase-like (A)	glutamate decarboxylase-like [Chenopodium quinoa]	RecName: Full=Glutamate decarboxylase; Short=GAD; EC=4.1.1.15; AltName: Full=ERT D1;	RecName: Full=Glutamate decarboxylase {ECO:0000256|RuleBase:RU361171}; EC=4.1.1.15 {ECO:0000256|RuleBase:RU361171};	Glutamate decarboxylase/sphingosine phosphate lyase	GO:0009506,plasmodesma; GO:0005516,calmodulin binding; GO:0004351,glutamate decarboxylase activity; GO:0030170,pyridoxal phosphate binding; GO:0006536,glutamate metabolic process	Pyridoxal-dependent decarboxylase conserved domain
gene-LOC110681925	2.58	1.66	1.78	0.63	0.47	1.05	46	29	28	11	8	18	3.138	1.65	0.00284015	0.032803	up	NW_018743574.1	1641543	1653840	+	LOC110681925	--	K11368 enhancer of yellow 2 transcription factor | (RefSeq) transcription and mRNA export factor SUS1-like (A)	transcription and mRNA export factor SUS1-like [Chenopodium quinoa]	RecName: Full=Transcription and mRNA export factor ENY2 {ECO:0000255|HAMAP-Rule:MF_03046}; AltName: Full=Enhancer of yellow 2 transcription factor homolog {ECO:0000255|HAMAP-Rule:MF_03046};	RecName: Full=Transcription and mRNA export factor ENY2 {ECO:0000256|HAMAP-Rule:MF_03046}; AltName: Full=Enhancer of yellow 2 transcription factor homolog {ECO:0000256|HAMAP-Rule:MF_03046};	Transcription factor e(y)2	GO:0071819,DUBm complex; GO:0005643,nuclear pore; GO:0000124,SAGA complex; GO:0003682,chromatin binding; GO:0003713,transcription coactivator activity; GO:0016578,histone deubiquitination; GO:0016973,poly(A)+ mRNA export from nucleus; GO:0045893,positive regulation of transcription, DNA-templated; GO:0006357,regulation of transcription by RNA polymerase II; GO:0006351,transcription, DNA-templated	Transcription factor e(y)2
gene-LOC110681944	2.09	1.99	1.99	0.07	0.12	0.34	89	83	75	3	5	14	12.702	3.667	8.92031e-12	8.01656e-10	up	NW_018743574.1	1808606	1813071	-	LOC110681944	--	K16871 4-aminobutyrate---pyruvate transaminase [EC:2.6.1.96] | (RefSeq) gamma aminobutyrate transaminase 3, chloroplastic-like (A)	gamma aminobutyrate transaminase 3, chloroplastic-like [Chenopodium quinoa]	RecName: Full=Gamma aminobutyrate transaminase 3, chloroplastic; AltName: Full=Gamma-aminobutyrate transaminase isozyme 3; Short=LeGABA-TP3; Short=SlGABA-T3; EC=2.6.1.96; Flags: Precursor;	SubName: Full=Uncharacterized protein {ECO:0000313|EMBL:KNA24573.1};	Alanine-glyoxylate aminotransferase AGT2	GO:0009507,chloroplast; GO:0034387,4-aminobutyrate:pyruvate transaminase activity; GO:0102351,gamma-aminobutyrate transaminase (glyoxylate dependent) activity; GO:0030170,pyridoxal phosphate binding	Aminotransferase class-III
gene-LOC110681983	3.33	2.09	1.37	0.42	0.47	1.18	88	54	32	11	12	30	3.757	1.91	0.00119483	0.0166098	up	NW_018742244.1	3005326	3006989	+	LOC110681983	--	K16290 xylem cysteine proteinase [EC:3.4.22.-] | (RefSeq) cysteine protease XCP2-like (A)	cysteine protease XCP2-like [Chenopodium quinoa]	RecName: Full=Cysteine protease XCP2 {ECO:0000305}; EC=3.4.22.-; AltName: Full=Xylem cysteine peptidase 2 {ECO:0000303|PubMed:10889267}; Short=AtXCP2 {ECO:0000303|PubMed:10889267}; Flags: Precursor;	SubName: Full=Uncharacterized protein {ECO:0000313|EMBL:KNA18262.1};	Cysteine proteinase Cathepsin L	GO:0005618,cell wall; GO:0005615,extracellular space; GO:0005764,lysosome; GO:0005886,plasma membrane; GO:0004197,cysteine-type endopeptidase activity; GO:0042742,defense response to bacterium; GO:0010623,programmed cell death involved in cell development; GO:0051603,proteolysis involved in cellular protein catabolic process	Papain family cysteine protease
gene-LOC110681988	0.35	0.51	0.4	0.06	0.09	0.16	25	36	25	4	6	11	4.498	2.169	0.000323258	0.00569922	up	NW_018743574.1	2382974	2386934	-	LOC110681988	--	K05681 ATP-binding cassette, subfamily G (WHITE), member 2 | (RefSeq) ABC transporter G family member 5-like (A)	ABC transporter G family member 5-like [Chenopodium quinoa]	RecName: Full=ABC transporter G family member 5; Short=ABC transporter ABCG.5; Short=AtABCG5; AltName: Full=White-brown complex homolog protein 5; Short=AtWBC5;	SubName: Full=Uncharacterized protein {ECO:0000313|EMBL:KNA05409.1};	Transporter, ABC superfamily (Breast cancer resistance protein)	GO:0016021,integral component of membrane; GO:0005886,plasma membrane; GO:0005524,ATP binding; GO:0042626,ATPase activity, coupled to transmembrane movement of substances	ABC-2 type transporter
gene-LOC110682066	2.3	2.34	2.65	1.03	0.55	2.04	207	206	210	91	48	177	2.28	1.189	0.00201665	0.0250714	up	NW_018743574.1	3139694	3144108	+	LOC110682066	--	K13415 protein brassinosteroid insensitive 1 [EC:2.7.10.1 2.7.11.1] | (RefSeq) systemin receptor SR160-like (A)	systemin receptor SR160-like [Chenopodium quinoa]	RecName: Full=Systemin receptor SR160; EC=2.7.11.1; AltName: Full=Brassinosteroid LRR receptor kinase; Flags: Precursor;	SubName: Full=Uncharacterized protein {ECO:0000313|EMBL:KNA23893.1};	--	GO:0016021,integral component of membrane; GO:0005886,plasma membrane; GO:0005524,ATP binding; GO:0004674,protein serine/threonine kinase activity; GO:0005496,steroid binding; GO:0006952,defense response	Leucine rich repeat
gene-LOC110682087	3.24	2.58	2.75	1.05	1.7	1.3	284	222	213	90	144	110	2.211	1.145	0.00253794	0.0299662	up	NW_018743574.1	3380689	3385553	-	LOC110682087	--	K05894 12-oxophytodienoic acid reductase [EC:1.3.1.42] | (RefSeq) artemisinic aldehyde Delta(11(13)) reductase-like isoform X1 (A)	artemisinic aldehyde Delta(11(13)) reductase-like isoform X1 [Chenopodium quinoa]	RecName: Full=12-oxophytodienoate reductase 3; EC=1.3.1.42; AltName: Full=12-oxophytodienoate-10,11-reductase 3; Short=AtOPR3; Short=OPDA-reductase 3; AltName: Full=Delayed dehiscence 1; Contains: RecName: Full=12-oxophytodienoate reductase 3, N-terminally processed;	SubName: Full=Uncharacterized protein {ECO:0000313|EMBL:KNA04621.1};	NADH:flavin oxidoreductase/12-oxophytodienoate reductase	GO:0005777,peroxisome; GO:0016629,12-oxophytodienoate reductase activity; GO:0010181,FMN binding; GO:0009695,jasmonic acid biosynthetic process; GO:0031408,oxylipin biosynthetic process; GO:0009620,response to fungus; GO:0010193,response to ozone; GO:0048443,stamen development	NADH:flavin oxidoreductase / NADH oxidase family
gene-LOC110682155	5.26	6.49	3.98	2.03	2.07	2.35	441	533	294	167	167	190	2.577	1.366	1.83246e-06	6.20934e-05	up	NW_018743574.1	4115653	4120549	-	LOC110682155	--	K05387 glutamate receptor, ionotropic, plant | (RefSeq) glutamate receptor 3.6-like (A)	glutamate receptor 3.6-like [Chenopodium quinoa]	RecName: Full=Glutamate receptor 3.6; AltName: Full=Ligand-gated ion channel 3.6; Flags: Precursor;	RecName: Full=Glutamate receptor {ECO:0000256|PIRNR:PIRNR037090};	Glutamate-gated kainate-type ion channel receptor subunit GluR5 and related subunits	GO:0016021,integral component of membrane; GO:0005622,intracellular; GO:0005886,plasma membrane; GO:0005262,calcium channel activity; GO:0008066,glutamate receptor activity; GO:0004970,ionotropic glutamate receptor activity; GO:0006816,calcium ion transport; GO:0019722,calcium-mediated signaling; GO:0007267,cell-cell signaling; GO:0071230,cellular response to amino acid stimulus; GO:0009864,induc…	Receptor family ligand binding region
gene-LOC110682171	9.33	9.39	8.11	1.11	1.56	1.46	205	202	157	24	33	31	6.87	2.78	7.15352e-16	1.14879e-13	up	NW_018743574.1	4223095	4225391	+	LOC110682171	--	K06123 1-acylglycerone phosphate reductase [EC:1.1.1.101] | (RefSeq) hypothetical protein (A)	NADPH-dependent 1-acyldihydroxyacetone phosphate reductase-like [Chenopodium quinoa]	RecName: Full=11-beta-hydroxysteroid dehydrogenase 1B; EC=1.1.1.146; AltName: Full=17-beta-hydroxysteroid dehydrogenase 1B; EC=1.1.1.-; AltName: Full=Hydroxysteroid dehydrogenase 1; Short=AtHSD1;	SubName: Full=Uncharacterized protein {ECO:0000313|EMBL:KNA06983.1}; Flags: Fragment;	1-Acyl dihydroxyacetone phosphate reductase and related dehydrogenases	GO:0016021,integral component of membrane; GO:0005811,lipid droplet; GO:0070524,11-beta-hydroxysteroid dehydrogenase (NADP+) activity; GO:0006694,steroid biosynthetic process	short chain dehydrogenase
gene-LOC110682187	0.67	1.75	2.05	0	0	0	7	18	19	0	0	0	85.022	6.41	2.77119e-05	0.000686956	up	NW_018743574.1	4355024	4356455	-	LOC110682187	--	--	--	--	--	--	--	--
gene-LOC110682196	29.79	18.53	20.16	10.94	11.86	11.11	550	335	328	198	211	198	2.152	1.106	0.00233137	0.0280147	up	NW_018743574.1	4603229	4604226	+	LOC110682196	--	K14500 BR-signaling kinase [EC:2.7.11.1] | (RefSeq) uncharacterized protein LOC108834630 (A)	PLAT domain-containing protein 3-like [Chenopodium quinoa]	RecName: Full=PLAT domain-containing protein 2 {ECO:0000305}; Short=AtPLAT2 {ECO:0000303|PubMed:25396746}; Short=PLAT domain protein 2 {ECO:0000303|PubMed:25396746}; Flags: Precursor;	SubName: Full=Uncharacterized protein {ECO:0000313|EMBL:KNA03099.1};	--	GO:0009507,chloroplast; GO:0005783,endoplasmic reticulum; GO:0016020,membrane; GO:0009579,thylakoid	PLAT/LH2 domain
gene-LOC110682232	6	7.36	7.06	2.4	2.16	2.25	533	640	552	209	185	193	3.133	1.648	3.27141e-12	3.16316e-10	up	NW_018743574.1	4930190	4939996	+	LOC110682232	--	--	uncharacterized protein LOC110682232 isoform X1 [Chenopodium quinoa]	--	SubName: Full=Uncharacterized protein {ECO:0000313|EMBL:KMT14263.1};	--	--	Plant transposase (Ptta/En/Spm family)
gene-LOC110682275	0.52	0.34	0.49	0.16	0.12	0.19	42	27	35	13	9	15	3.124	1.643	0.0018631	0.023567	up	NW_018743574.1	5307175	5313543	+	LOC110682275	--	--	uncharacterized protein LOC110682275 isoform X1 [Chenopodium quinoa]	RecName: Full=Zinc finger CCCH domain-containing protein 62; Short=OsC3H62;	SubName: Full=Uncharacterized protein {ECO:0000313|EMBL:KNA07500.1};	--	GO:0003677,DNA binding; GO:0046872,metal ion binding	SAP domain
gene-LOC110682315	8.45	15.58	6.48	5.38	3.05	6.61	293	529	198	183	102	221	2.186	1.129	0.00321597	0.0360081	up	NW_018743574.1	5839127	5844721	+	LOC110682315	--	--	PI-PLC X domain-containing protein At5g67130-like [Chenopodium quinoa]	RecName: Full=PI-PLC X domain-containing protein At5g67130; Flags: Precursor;	SubName: Full=Uncharacterized protein {ECO:0000313|EMBL:KMS95399.1};	--	GO:0046658,anchored component of plasma membrane; GO:0005886,plasma membrane; GO:0008081,phosphoric diester hydrolase activity; GO:0006629,lipid metabolic process	--
gene-LOC110682335	3.2	4.91	2.73	1.8	1.21	1.69	96	144	72	53	35	49	2.434	1.283	0.000488455	0.00799583	up	NW_018743574.1	6165266	6177209	-	LOC110682335	--	K11091 U1 small nuclear ribonucleoprotein A | (RefSeq) hypothetical protein (A)	RNA binding protein fox-1 homolog 3-like isoform X1 [Chenopodium quinoa]	--	SubName: Full=Uncharacterized protein {ECO:0000313|EMBL:KNA03590.1}; Flags: Fragment;	RNA binding protein (contains RRM repeats)	GO:0003723,RNA binding	RNA recognition motif. (a.k.a. RRM, RBD, or RNP domain)
gene-LOC110682387	3.45	6.89	3.41	1.38	1.34	2.02	163	319	142	64	61	92	3.072	1.619	4.59483e-06	0.000141076	up	NW_018743574.1	6791317	6793635	-	LOC110682387	--	--	CAR1 transcription factor-like [Chenopodium quinoa]	--	SubName: Full=Uncharacterized protein {ECO:0000313|EMBL:KNA15231.1};	--	--	--
gene-LOC110682401	2.44	3.08	1.89	0.9	0.86	0.92	47	58	32	17	16	17	2.922	1.547	0.00083545	0.0123978	up	NW_018743574.1	6889062	6890180	-	LOC110682401	--	--	protein PFC0760c-like [Chenopodium quinoa]	--	SubName: Full=Uncharacterized protein {ECO:0000313|EMBL:KNA21451.1};	--	GO:0016021,integral component of membrane	--
gene-LOC110682415	41.45	63.29	52.8	18.07	26.89	17.67	1104	1651	1239	472	690	454	2.534	1.342	0.000125892	0.00256337	up	NW_018743574.1	7027395	7028810	-	LOC110682415	--	K21994 LOB domain-containing protein 18 | (RefSeq) LOB domain-containing protein 19 (A)	LOB domain-containing protein 38-like [Chenopodium quinoa]	RecName: Full=LOB domain-containing protein 39; AltName: Full=ASYMMETRIC LEAVES 2-like protein 41; Short=AS2-like protein 41;	SubName: Full=Uncharacterized protein {ECO:0000313|EMBL:KNA03355.1};	--	--	Lateral organ boundaries (LOB) domain
gene-LOC110682416	14.59	11.93	10.86	1.64	4.02	1.59	772	618	506	85	205	81	5.16	2.367	4.34132e-06	0.000134073	up	NW_018743574.1	7035486	7040387	+	LOC110682416	--	K01455 formamidase [EC:3.5.1.49] | (RefSeq) uncharacterized protein LOC110682416 isoform X1 (A)	uncharacterized protein LOC110682416 isoform X1 [Chenopodium quinoa]	--	SubName: Full=Uncharacterized protein {ECO:0000313|EMBL:OAY35542.1};	--	GO:0016811,hydrolase activity, acting on carbon-nitrogen (but not peptide) bonds, in linear amides	Acetamidase/Formamidase family
gene-LOC110682419	0.85	1.47	1.16	0.16	0.18	0.18	39	66	47	7	8	8	7.046	2.817	4.96268e-08	2.3713e-06	up	NW_018743574.1	7131126	7134013	+	LOC110682419	--	--	probable N-acetyltransferase HLS1 [Chenopodium quinoa]	RecName: Full=Probable N-acetyltransferase HLS1-like; EC=2.3.1.-;	SubName: Full=Uncharacterized protein {ECO:0000313|EMBL:KNA07929.1};	--	GO:0008080,N-acetyltransferase activity; GO:0016747,transferase activity, transferring acyl groups other than amino-acyl groups; GO:0006473,protein acetylation	Acetyltransferase (GNAT) family
gene-LOC110682486	4.79	4.46	2.31	1.05	0.69	1.9	167	152	71	36	23	64	3.579	1.84	6.4583e-05	0.00143356	up	NW_018742244.1	3562594	3564302	-	LOC110682486	--	K23260 scopoletin glucosyltransferase [EC:2.4.1.128] | (RefSeq) scopoletin glucosyltransferase-like (A)	scopoletin glucosyltransferase-like [Chenopodium quinoa]	RecName: Full=Scopoletin glucosyltransferase; EC=2.4.1.128; AltName: Full=Phenylpropanoid:glucosyltransferase 1;	RecName: Full=Glycosyltransferase {ECO:0000256|RuleBase:RU362057}; EC=2.4.1.- {ECO:0000256|RuleBase:RU362057};	UDP-glucuronosyl and UDP-glucosyl transferase	GO:0042802,identical protein binding; GO:0050275,scopoletin glucosyltransferase activity; GO:0008152,metabolic process	UDP-glucoronosyl and UDP-glucosyl transferase
gene-LOC110682506	3.42	3.22	3.17	1.79	1.17	1.4	76	70	62	39	25	30	2.392	1.258	0.00119865	0.0166428	up	NW_018743574.1	8188110	8191705	-	LOC110682506	--	K02201 pantetheine-phosphate adenylyltransferase [EC:2.7.7.3] | (RefSeq) phosphopantetheine adenylyltransferase (A)	phosphopantetheine adenylyltransferase [Chenopodium quinoa]	RecName: Full=Phosphopantetheine adenylyltransferase; EC=2.7.7.3; AltName: Full=AtCoaD; AltName: Full=Dephospho-CoA pyrophosphorylase; AltName: Full=Pantetheine-phosphate adenylyltransferase;	SubName: Full=Uncharacterized protein {ECO:0000313|EMBL:KNA17682.1};	Predicted nucleotidyltransferase	GO:0005829,cytosol; GO:0005524,ATP binding; GO:0004595,pantetheine-phosphate adenylyltransferase activity; GO:0015937,coenzyme A biosynthetic process; GO:0040007,growth; GO:0006629,lipid metabolic process; GO:0019915,lipid storage; GO:0080020,regulation of coenzyme A biosynthetic process; GO:0006970,response to osmotic stress; GO:0009651,response to salt stress	Cytidylyltransferase-like
gene-LOC110682510	5.32	5.57	6.82	1.83	1.18	2.25	154	158	174	52	33	63	3.637	1.863	5.18351e-10	3.57459e-08	up	NW_018743574.1	8210478	8214081	-	LOC110682510	--	K16275 E3 ubiquitin-protein ligase BAH [EC:2.3.2.27] | (RefSeq) probable E3 ubiquitin-protein ligase BAH1-like 1 (A)	probable E3 ubiquitin-protein ligase BAH1-like 1 [Chenopodium quinoa]	RecName: Full=Probable E3 ubiquitin-protein ligase BAH1-like 1; EC=2.3.2.27 {ECO:0000305}; AltName: Full=RING-type E3 ubiquitin transferase BAH1-like 1 {ECO:0000305};	SubName: Full=Uncharacterized protein {ECO:0000313|EMBL:ESR57549.1};	--	GO:0046872,metal ion binding; GO:0016740,transferase activity; GO:0016567,protein ubiquitination	Zinc finger, C3HC4 type (RING finger)
gene-LOC110682689	2.3	0	4.32	0	0	0.13	38	0	63	0	0	2	64.214	6.005	0.00113895	0.0159712	up	NW_018743591.1	434040	443919	-	LOC110682689	--	K06268 serine/threonine-protein phosphatase 2B regulatory subunit | (RefSeq) uncharacterized protein LOC110682689 (A)	uncharacterized protein LOC110682689 [Chenopodium quinoa]	RecName: Full=Calcineurin B-like protein 1; AltName: Full=SOS3-like calcium-binding protein 5;	SubName: Full=Uncharacterized protein {ECO:0000313|EMBL:KNA25577.1};	Ca2+/calmodulin-dependent protein phosphatase (calcineurin subunit B), EF-Hand superfamily protein	GO:0005737,cytoplasm; GO:0005886,plasma membrane; GO:0090406,pollen tube; GO:0005509,calcium ion binding; GO:0019900,kinase binding; GO:0009738,abscisic acid-activated signaling pathway; GO:0019722,calcium-mediated signaling; GO:0009860,pollen tube growth; GO:0009409,response to cold; GO:0006970,response to osmotic stress; GO:0009651,response to salt stress; GO:0009414,response to water deprivati…	EF hand
gene-LOC110682715	0.57	0.51	0.51	0.03	0.05	0.05	23	20	18	1	2	2	13.307	3.734	3.43898e-05	0.000825355	up	NW_018743592.1	11446	17270	+	LOC110682715	--	K17604 zinc finger SWIM domain-containing protein 3 | (RefSeq) protein FAR1-RELATED SEQUENCE 6-like (A)	protein FAR1-RELATED SEQUENCE 1-like [Chenopodium quinoa]	RecName: Full=Protein FAR-RED ELONGATED HYPOCOTYL 3;	SubName: Full=Uncharacterized protein {ECO:0000313|EMBL:KMS93850.1}; Flags: Fragment;	--	GO:0005634,nucleus; GO:0003700,DNA-binding transcription factor activity; GO:0008270,zinc ion binding; GO:0007623,circadian rhythm; GO:0010018,far-red light signaling pathway; GO:0042753,positive regulation of circadian rhythm; GO:0045893,positive regulation of transcription, DNA-templated; GO:0010017,red or far-red light signaling pathway; GO:0009585,red, far-red light phototransduction; GO:0010…	--
gene-LOC110682775	0.94	1.62	1.58	0	0	0	25	42	37	0	0	0	201.437	7.654	7.46426e-09	4.15837e-07	up	NW_018742249.1	166834	170854	+	LOC110682775	--	--	uncharacterized protein LOC110682775 [Chenopodium quinoa]	--	--	--	--	--
gene-LOC110682784	1.32	3.14	0.31	0.17	0	0.06	24	56	5	3	0	1	22.202	4.473	0.00027295	0.00493816	up	NW_018742249.1	184607	188312	+	LOC110682784	--	--	uncharacterized protein LOC110682784 [Chenopodium quinoa]	--	SubName: Full=Uncharacterized protein {ECO:0000313|EMBL:KNA23047.1};	--	--	emp24/gp25L/p24 family/GOLD
gene-LOC110682786	0.7	1.15	1.44	0	0	0	5	8	9	0	0	0	42.849	5.421	0.00155178	0.0203879	up	NW_018743593.1	2514665	2515968	-	LOC110682786	--	--	--	--	--	--	--	--
gene-LOC110682806	5.26	3.62	8.71	0	0	0	214	144	312	0	0	0	1337.51	10.385	3.43225e-16	5.8153e-14	up	NW_018743593.1	3268121	3270930	-	LOC110682806	--	--	uncharacterized protein LOC110682806 [Chenopodium quinoa]	--	SubName: Full=Uncharacterized protein {ECO:0000313|EMBL:KNA13421.1};	--	--	--
gene-LOC110682953	33.43	50.2	40.89	0	0	0	387	569	417	0	0	0	2656.16	11.375	5.29065e-21	1.7605e-18	up	NW_018743616.1	2694678	2695659	-	LOC110682953	--	--	--	--	--	--	--	--
gene-LOC110682957	2.01	2.01	2.82	0.64	0.34	1.62	109	107	135	34	18	85	3.014	1.592	0.00101225	0.0144973	up	NW_018743616.1	47323	50842	+	LOC110682957	--	K14514 ethylene-insensitive protein 3 | (RefSeq) ETHYLENE INSENSITIVE 3-like 3 protein isoform X1 (A)	ETHYLENE INSENSITIVE 3-like 3 protein isoform X1 [Chenopodium quinoa]	RecName: Full=ETHYLENE INSENSITIVE 3-like 3 protein;	SubName: Full=Uncharacterized protein {ECO:0000313|EMBL:KNA25430.1};	--	GO:0005634,nucleus; GO:0003677,DNA binding; GO:0003700,DNA-binding transcription factor activity; GO:0071281,cellular response to iron ion; GO:0009873,ethylene-activated signaling pathway; GO:0042762,regulation of sulfur metabolic process; GO:0006355,regulation of transcription, DNA-templated; GO:0006351,transcription, DNA-templated	Ethylene insensitive 3
gene-LOC110682961	18.92	15.22	11.32	5.9	5.45	8.4	782	616	412	239	217	335	2.521	1.334	1.94079e-05	0.000502348	up	NW_018743616.1	119026	122989	-	LOC110682961	--	K00924 kinase [EC:2.7.1.-] | (RefSeq) probable receptor-like protein kinase At3g55450 (A)	serine/threonine-protein kinase RIPK-like [Chenopodium quinoa]	RecName: Full=Serine/threonine-protein kinase RIPK {ECO:0000305}; EC=2.7.11.1 {ECO:0000305|PubMed:21320696}; AltName: Full=ACIK1A/PBL14; AltName: Full=ACRE protein ortholog 264A {ECO:0000305}; Short=AtACRE264a {ECO:0000303|PubMed:15181213}; AltName: Full=PBS1-like protein 14 {ECO:0000303|PubMed:20413097}; AltName: Full=RPM1-induced protein kinase {ECO:0000303|PubMed:21320696};	SubName: Full=Uncharacterized protein {ECO:0000313|EMBL:KMS96228.1};	Serine/threonine protein kinase	GO:0005886,plasma membrane; GO:0005524,ATP binding; GO:0004674,protein serine/threonine kinase activity; GO:0004675,transmembrane receptor protein serine/threonine kinase activity; GO:0007166,cell surface receptor signaling pathway; GO:0042742,defense response to bacterium; GO:0006468,protein phosphorylation	Protein tyrosine kinase
gene-LOC110682970	2.13	3.11	2.96	1.56	0.76	1.9	330	471	403	237	113	283	2.116	1.082	0.000341727	0.0059693	up	NW_018743616.1	341369	351739	-	LOC110682970	--	K01303 acylaminoacyl-peptidase [EC:3.4.19.1] | (RefSeq) uncharacterized LOC101311565 (A)	uncharacterized protein LOC110682970 [Chenopodium quinoa]	RecName: Full=RNA-directed DNA polymerase homolog; EC=2.7.7.48; AltName: Full=Reverse transcriptase homolog;	SubName: Full=Uncharacterized protein {ECO:0000313|EMBL:CAN65719.1};	FOG: Transposon-encoded proteins with TYA, reverse transcriptase, integrase domains in various combinations	GO:0005739,mitochondrion; GO:0003968,RNA-directed 5'-3' RNA polymerase activity; GO:0003964,RNA-directed DNA polymerase activity	Reverse transcriptase (RNA-dependent DNA polymerase)
gene-LOC110683027	1.21	2.08	1.41	0.64	0.75	1.03	67	113	69	35	40	55	2.059	1.042	0.0032	0.0358928	up	NW_018743616.1	1946337	1949053	-	LOC110683027	--	--	serine/arginine repetitive matrix protein 1-like [Chenopodium quinoa]	--	SubName: Full=Uncharacterized protein {ECO:0000313|EMBL:KNA09606.1};	--	GO:0016021,integral component of membrane	Cotton fibre expressed protein
gene-LOC110683064	0.84	0.81	0.9	0.39	0.38	0.43	53	50	50	24	23	26	2.27	1.183	0.00285524	0.0329257	up	NW_018743616.1	2945573	2951348	+	LOC110683064	--	K06889 uncharacterized protein | (RefSeq) uncharacterized protein LOC111284773 (A)	uncharacterized protein LOC110683064 [Chenopodium quinoa]	--	SubName: Full=Uncharacterized protein {ECO:0000313|EMBL:KNA13464.1};	Predicted esterase	--	Serine aminopeptidase, S33
gene-LOC110683083	37.49	45.6	50.74	14.06	16.31	24.91	816	972	973	300	342	523	2.604	1.381	1.74223e-09	1.0868e-07	up	NW_018742263.1	6363631	6364698	-	LOC110683083	--	--	protein E6-like [Chenopodium quinoa]	--	SubName: Full=Uncharacterized protein {ECO:0000313|EMBL:KNA15890.1};	--	--	--
gene-LOC110683095	9.09	11.43	8.97	4.07	5.08	3.99	260	320	226	114	140	110	2.314	1.21	0.000168579	0.00328409	up	NW_018743616.1	3700183	3702998	+	LOC110683095	--	K13066 caffeic acid 3-O-methyltransferase [EC:2.1.1.68] | (RefSeq) COMT1-2; caffeic acid O-methyltransferase (A)	caffeic acid 3-O-methyltransferase-like [Chenopodium quinoa]	RecName: Full=Caffeic acid 3-O-methyltransferase; Short=CAOMT; Short=COMT; EC=2.1.1.68; AltName: Full=S-adenosysl-L-methionine:caffeic acid 3-O-methyltransferase;	SubName: Full=Uncharacterized protein {ECO:0000313|EMBL:KNA19751.1};	Hydroxyindole-O-methyltransferase and related SAM-dependent methyltransferases	GO:0047763,caffeate O-methyltransferase activity; GO:0046983,protein dimerization activity; GO:0009809,lignin biosynthetic process	O-methyltransferase domain
gene-LOC110683155	48.3	40.94	50.04	1.91	3.29	1.06	1705	1415	1556	66	112	36	22.069	4.464	6.50019e-19	1.6558e-16	up	NW_018743623.1	136624	143742	-	LOC110683155	--	K01609 indole-3-glycerol phosphate synthase [EC:4.1.1.48] | (RefSeq) indole-3-glycerol phosphate synthase, chloroplastic-like isoform X1 (A)	indole-3-glycerol phosphate synthase, chloroplastic-like isoform X2 [Chenopodium quinoa]	RecName: Full=Indole-3-glycerol phosphate synthase, chloroplastic {ECO:0000303|PubMed:7610197}; Short=IGPS {ECO:0000303|PubMed:7610197}; EC=4.1.1.48 {ECO:0000269|PubMed:7610197}; Flags: Precursor;	SubName: Full=Uncharacterized protein {ECO:0000313|EMBL:KNA03126.1};	Anthranilate synthase component II	GO:0009507,chloroplast; GO:0009570,chloroplast stroma; GO:0005829,cytosol; GO:0005507,copper ion binding; GO:0004425,indole-3-glycerol-phosphate synthase activity; GO:0000162,tryptophan biosynthetic process	Indole-3-glycerol phosphate synthase
gene-LOC110683171	2460.1	2122.02	2692.65	1281.87	1061.19	918.16	137174	115869	132268	70088	57001	49393	2.322	1.215	8.55735e-05	0.00183294	up	NW_018743623.1	332540	337999	+	LOC110683171	--	K00549 5-methyltetrahydropteroyltriglutamate--homocysteine methyltransferase [EC:2.1.1.14] | (RefSeq) 5-methyltetrahydropteroyltriglutamate-- homocysteine methyltransferase (A)	5-methyltetrahydropteroyltriglutamate--homocysteine methyltransferase [Chenopodium quinoa]	RecName: Full=5-methyltetrahydropteroyltriglutamate--homocysteine methyltransferase; EC=2.1.1.14; AltName: Full=Cobalamin-independent methionine synthase isozyme; AltName: Full=Vitamin-B12-independent methionine synthase isozyme;	SubName: Full=Uncharacterized protein {ECO:0000313|EMBL:KNA04237.1};	Methionine synthase II (cobalamin-independent)	GO:0005737,cytoplasm; GO:0003871,5-methyltetrahydropteroyltriglutamate-homocysteine S-methyltransferase activity; GO:0008270,zinc ion binding; GO:0009086,methionine biosynthetic process	Cobalamin-independent synthase, Catalytic domain
gene-LOC110683189	20.17	15.14	10.01	4.93	5.5	6.28	956	703	418	229	251	287	2.928	1.55	2.4471e-05	0.000614453	up	NW_018743623.1	847019	852822	+	LOC110683189	--	K05349 beta-glucosidase [EC:3.2.1.21] | (RefSeq) uncharacterized protein LOC110683189 (A)	uncharacterized protein LOC110683189 [Chenopodium quinoa]	RecName: Full=Beta-xylosidase/alpha-L-arabinofuranosidase 2 {ECO:0000303|PubMed:17615411, ECO:0000312|EMBL:ABQ45228.1}; AltName: Full=Xylan 1,4-beta-xylosidase/Alpha-L-arabinofuranosidase 2; Short=MsXyl2 {ECO:0000303|PubMed:17615411}; Includes: RecName: Full=Beta-xylosidase; EC=3.2.1.37; AltName: Full=1,4-beta-D-xylan xylohydrolase {ECO:0000250|UniProtKB:P48792}; AltName: Full=Xylan 1,4-beta-xylo…	SubName: Full=Uncharacterized protein {ECO:0000313|EMBL:KNA06938.1};	--	GO:0005578,NA; GO:0046556,alpha-L-arabinofuranosidase activity; GO:0009044,xylan 1,4-beta-xylosidase activity; GO:0045493,xylan catabolic process	Glycosyl hydrolase family 3 N terminal domain
gene-LOC110683223	1461.57	1448.28	1040.83	664.78	571.79	329.99	60318	58530	37841	26902	22732	13139	2.569	1.361	0.000943622	0.0136618	up	NW_018743635.1	37908	46118	+	LOC110683223	--	K05929 phosphoethanolamine N-methyltransferase [EC:2.1.1.103] | (RefSeq) phosphoethanolamine N-methyltransferase (A)	phosphoethanolamine N-methyltransferase [Chenopodium quinoa]	RecName: Full=Phosphoethanolamine N-methyltransferase; EC=2.1.1.103;	SubName: Full=Phosphoethanolamine N-methyltransferase {ECO:0000313|EMBL:AEY75253.1};	SAM-dependent methyltransferases	GO:0005737,cytoplasm; GO:0000234,phosphoethanolamine N-methyltransferase activity; GO:0006656,phosphatidylcholine biosynthetic process	Methyltransferase domain
gene-LOC110683226	0.9	0.03	0.85	0.03	0.06	0.06	34	1	28	1	2	2	14.346	3.843	0.00291071	0.0334297	up	NW_018743636.1	23091	25648	+	LOC110683226	--	K21435 ankyrin repeat domain-containing protein 6 | (RefSeq) mucin-17-like (A)	ankyrin repeat-containing protein ITN1-like [Chenopodium quinoa]	RecName: Full=Ankyrin repeat-containing protein At2g01680;	SubName: Full=Uncharacterized protein {ECO:0000313|EMBL:KNA11865.1};	FOG: Ankyrin repeat	GO:0016021,integral component of membrane; GO:0005886,plasma membrane	Ankyrin repeats (3 copies)
gene-LOC110683293	1.89	5.15	0.47	0.05	0	0.13	77	205	17	2	0	5	47.208	5.561	5.68828e-08	2.69017e-06	up	NW_018743669.1	1373913	1378254	-	LOC110683293	--	K01953 asparagine synthase (glutamine-hydrolysing) [EC:6.3.5.4] | (RefSeq) asparagine synthetase [glutamine-hydrolyzing] 1-like (A)	asparagine synthetase [glutamine-hydrolyzing]	RecName: Full=Asparagine synthetase [glutamine-hydrolyzing]; EC=6.3.5.4; AltName: Full=Glutamine-dependent asparagine synthetase;	SubName: Full=Uncharacterized protein {ECO:0000313|EMBL:KNA18676.1};	Asparagine synthase (glutamine-hydrolyzing)	GO:0004066,asparagine synthase (glutamine-hydrolyzing) activity; GO:0005524,ATP binding; GO:0006541,glutamine metabolic process; GO:0070981,L-asparagine biosynthetic process	Asparagine synthase
gene-LOC110683311	1.47	2.45	1.18	0.08	0	0.06	55	90	39	3	0	2	39.793	5.314	2.12531e-10	1.55755e-08	up	NW_018743669.1	1004322	1007220	-	LOC110683311	--	K01381 saccharopepsin [EC:3.4.23.25] | (RefSeq) aspartic proteinase CDR1-like (A)	aspartic proteinase CDR1-like [Chenopodium quinoa]	RecName: Full=Probable aspartic protease At2g35615; EC=3.4.-.-; Flags: Precursor;	SubName: Full=Uncharacterized protein {ECO:0000313|EMBL:KNA25909.1};	Aspartyl protease	GO:0005576,extracellular region; GO:0004190,aspartic-type endopeptidase activity; GO:0030163,protein catabolic process; GO:0006508,proteolysis	Xylanase inhibitor N-terminal
gene-LOC110683332	1.11	0.8	0.59	0.07	0	0	51	36	24	3	0	0	40.097	5.325	1.01303e-06	3.69008e-05	up	NW_018743669.1	48262	51622	-	LOC110683332	--	K05909 laccase [EC:1.10.3.2] | (RefSeq) laccase-2-like (A)	laccase-2-like [Chenopodium quinoa]	RecName: Full=Laccase-17; EC=1.10.3.2; AltName: Full=Benzenediol:oxygen oxidoreductase 17; AltName: Full=Diphenol oxidase 17; AltName: Full=Urishiol oxidase 17; Flags: Precursor;	RecName: Full=Laccase {ECO:0000256|RuleBase:RU361119}; EC=1.10.3.2 {ECO:0000256|RuleBase:RU361119}; AltName: Full=Benzenediol:oxygen oxidoreductase {ECO:0000256|RuleBase:RU361119}; AltName: Full=Diphenol oxidase {ECO:0000256|RuleBase:RU361119}; AltName: Full=Urishiol oxidase {ECO:0000256|RuleBase:RU361119};	Multicopper oxidases	GO:0048046,apoplast; GO:0005507,copper ion binding; GO:0052716,hydroquinone:oxygen oxidoreductase activity; GO:0016491,oxidoreductase activity; GO:0016722,oxidoreductase activity, oxidizing metal ions; GO:0009809,lignin biosynthetic process; GO:0046274,lignin catabolic process; GO:0009698,phenylpropanoid metabolic process	Multicopper oxidase
gene-LOC110683379	51.42	20.5	26.58	3.9	2.84	2.65	1708	667	778	127	91	85	11.327	3.502	2.34049e-13	2.7185e-11	up	NW_018743669.1	391909	393972	-	LOC110683379	--	K13493 cytokinin-N-glucosyltransferase [EC:2.4.1.-] | (RefSeq) hypothetical protein (A)	UDP-glycosyltransferase 76E4-like [Chenopodium quinoa]	RecName: Full=UDP-glycosyltransferase 76H1 {ECO:0000303|PubMed:15610349}; EC=2.4.1.- {ECO:0000305};	SubName: Full=Uncharacterized protein {ECO:0000313|EMBL:ESR41069.1};	UDP-glucuronosyl and UDP-glucosyl transferase	GO:0016758,transferase activity, transferring hexosyl groups; GO:0008152,metabolic process	UDP-glucoronosyl and UDP-glucosyl transferase
gene-LOC110683401	17.68	18.86	14.53	7.65	5.19	14.91	290	303	210	123	82	236	2.07	1.049	0.00201344	0.0250567	up	NW_018743669.1	565095	566468	+	LOC110683401	--	--	uncharacterized protein LOC110683401 [Chenopodium quinoa]	--	SubName: Full=Uncharacterized protein {ECO:0000313|EMBL:KNA02968.1};	--	--	--
gene-LOC110683422	108.03	56.38	75.25	25.68	24.27	16.42	6880	3516	4222	1604	1489	1009	3.781	1.919	7.11847e-06	0.000208013	up	NW_018743669.1	765434	770633	+	LOC110683422	--	K03147 phosphomethylpyrimidine synthase [EC:4.1.99.17] | (RefSeq) phosphomethylpyrimidine synthase, chloroplastic-like isoform X1 (A)	phosphomethylpyrimidine synthase, chloroplastic-like isoform X1 [Chenopodium quinoa]	RecName: Full=Phosphomethylpyrimidine synthase, chloroplastic; EC=4.1.99.17; AltName: Full=Hydroxymethylpyrimidine phosphate synthase; Short=HMP-P synthase; Short=HMP-phosphate synthase; Short=HMPP synthase; AltName: Full=Protein PYRIMIDINE REQUIRING; AltName: Full=Thiamine biosynthesis protein ThiC; Short=Protein THIAMINE C; Flags: Precursor;	SubName: Full=Uncharacterized protein {ECO:0000313|EMBL:KNA05284.1};	--	GO:0009507,chloroplast; GO:0009570,chloroplast stroma; GO:0009536,plastid; GO:0051539,4 iron, 4 sulfur cluster binding; GO:0080041,ADP-ribose pyrophosphohydrolase activity; GO:0016830,carbon-carbon lyase activity; GO:0051536,iron-sulfur cluster binding; GO:0046872,metal ion binding; GO:0019904,protein domain specific binding; GO:0010266,response to vitamin B1; GO:0009228,thiamine biosynthetic pro…	Radical SAM ThiC family
gene-LOC110683451	2.04	1.6	1.08	0.2	0.39	0.19	124	95	58	12	23	11	6.24	2.641	3.09681e-06	9.92913e-05	up	NW_018743669.1	1000795	1009009	+	LOC110683451	--	--	RING finger protein 141-like [Chenopodium quinoa]	RecName: Full=E3 ubiquitin-protein ligase AIRP2 {ECO:0000305}; EC=2.3.2.27 {ECO:0000269|PubMed:21969385}; AltName: Full=Protein ABA INSENSITIVE RING PROTEIN 2 {ECO:0000303|PubMed:21969385}; Short=AtAIRP2 {ECO:0000303|PubMed:21969385}; AltName: Full=RING-type E3 ubiquitin transferase AIRP2 {ECO:0000305};	SubName: Full=Uncharacterized protein {ECO:0000313|EMBL:KNA25908.1};	Predicted E3 ubiquitin ligase	GO:0005829,cytosol; GO:0061630,ubiquitin protein ligase activity; GO:0009737,response to abscisic acid; GO:0009651,response to salt stress; GO:0006511,ubiquitin-dependent protein catabolic process	Ring finger domain
gene-LOC110683454	2.17	1.99	2.57	0.72	0.3	1.22	68	61	71	22	9	37	3.38	1.757	0.000246835	0.00453813	up	NW_018743669.1	1034683	1036219	-	LOC110683454	--	K22419 Delta4-3-oxosteroid 5beta-reductase [EC:1.3.1.3] | (RefSeq) 3-oxo-Delta(4,5)-steroid 5-beta-reductase (A)	3-oxo-Delta(4,5)-steroid 5-beta-reductase [Chenopodium quinoa]	RecName: Full=3-oxo-Delta(4,5)-steroid 5-beta-reductase; EC=1.3.1.3 {ECO:0000269|PubMed:19166903, ECO:0000269|PubMed:20598327, ECO:0000269|PubMed:22357344}; AltName: Full=Delta(4)-3-oxosteroid 5-beta-reductase; AltName: Full=Delta-4,5-steroid 5-beta-reductase; Short=At5beta-StR; AltName: Full=Progesterone 5-beta-reductase; Short=5beta-POR; AltName: Full=Protein VEIN PATTERNING 1;	SubName: Full=Uncharacterized protein {ECO:0000313|EMBL:KNA25913.1};	--	GO:0005829,cytosol; GO:0047787,delta4-3-oxosteroid 5beta-reductase activity; GO:0035671,enone reductase activity; GO:0009611,response to wounding; GO:0008202,steroid metabolic process; GO:0010051,xylem and phloem pattern formation	NAD dependent epimerase/dehydratase family
gene-LOC110683457	1.95	1.39	1.25	0.58	0.44	1.09	133	93	75	39	29	72	2.445	1.29	0.00206613	0.0255428	up	NW_018743669.1	1052668	1057347	+	LOC110683457	--	K19517 1D-myo-inositol 3-kinase [EC:2.7.1.64] | (RefSeq) inositol 3-kinase-like (A)	inositol 3-kinase-like [Chenopodium quinoa]	RecName: Full=Inositol 3-kinase {ECO:0000305}; EC=2.7.1.64 {ECO:0000250|UniProtKB:Q5GA22}; AltName: Full=Myo-inositol kinase {ECO:0000305}; Short=AtMIK {ECO:0000303|PubMed:21698461};	SubName: Full=Uncharacterized protein {ECO:0000313|EMBL:KNA25918.1};	Ribokinase	GO:0005524,ATP binding; GO:0019140,inositol 3-kinase activity; GO:0010264,myo-inositol hexakisphosphate biosynthetic process	pfkB family carbohydrate kinase
gene-LOC110683476	4.55	6.61	5.92	0.16	0.33	0.68	145	206	166	5	10	21	15.931	3.994	9.76327e-20	2.75279e-17	up	NW_018743669.1	1211000	1213085	-	LOC110683476	--	--	--	--	--	--	--	--
gene-LOC110683504	0.91	1.96	0.71	0	0	0	26	55	18	0	0	0	187.479	7.551	5.4757e-08	2.60296e-06	up	NW_018743669.1	1549697	1552070	-	LOC110683504	--	K15095 (+)-neomenthol dehydrogenase [EC:1.1.1.208] | (RefSeq) (+)-neomenthol dehydrogenase-like (A)	(+)-neomenthol dehydrogenase-like [Chenopodium quinoa]	RecName: Full=(+)-neomenthol dehydrogenase {ECO:0000303|PubMed:18599651}; EC=1.1.1.- {ECO:0000269|PubMed:21169366}; EC=1.1.1.208 {ECO:0000269|PubMed:18599651}; AltName: Full=Menthone:neomenthol reductase; AltName: Full=Short-chain dehydrogenase/reductase 1; Short=AtSDR1;	SubName: Full=Uncharacterized protein {ECO:0000313|EMBL:KDP42906.1};	Dehydrogenases with different specificities (related to short-chain alcohol dehydrogenases)	GO:0005737,cytoplasm; GO:0047501,(+)-neomenthol dehydrogenase activity; GO:0006952,defense response	short chain dehydrogenase
gene-LOC110683534	1.22	1.38	1.71	0.43	0.53	0.94	55	61	68	19	23	41	2.464	1.301	0.00132214	0.0180448	up	NW_018743669.1	1781709	1784655	+	LOC110683534	--	--	uncharacterized protein LOC110683534 [Chenopodium quinoa]	--	SubName: Full=Uncharacterized protein {ECO:0000313|EMBL:KNA18913.1};	--	--	--
gene-LOC110683568	19.85	30.64	13.38	7.62	6.66	8.99	1219	1843	724	459	394	533	2.904	1.538	2.76199e-06	8.99619e-05	up	NW_018743669.1	2239688	2244093	-	LOC110683568	--	--	BEL1-like homeodomain protein 1 [Chenopodium quinoa]	RecName: Full=BEL1-like homeodomain protein 1; Short=BEL1-like protein 1; AltName: Full=Protein EMBRYO SAC DEVELOPMENT ARREST 29;	SubName: Full=Uncharacterized protein {ECO:0000313|EMBL:KNA25228.1};	Transcription factor MEIS1 and related HOX domain proteins	GO:0005737,cytoplasm; GO:0005634,nucleus; GO:0003677,DNA binding; GO:0003700,DNA-binding transcription factor activity; GO:0046982,protein heterodimerization activity; GO:0042803,protein homodimerization activity; GO:0010197,polar nucleus fusion; GO:0009737,response to abscisic acid; GO:0010201,response to continuous far red light stimulus by the high-irradiance response system; GO:0009610,respon…	Associated with HOX
gene-LOC110683635	1.87	2.56	3.72	0.74	0.14	0.61	41	55	72	16	3	13	5.872	2.554	2.04318e-05	0.000527004	up	NW_018743688.1	38540	40495	+	LOC110683635	--	K00850 6-phosphofructokinase 1 [EC:2.7.1.11] | (RefSeq) ATP-dependent 6-phosphofructokinase 5, chloroplastic-like (A)	uncharacterized protein LOC110683635 isoform X1 [Chenopodium quinoa]	--	SubName: Full=Uncharacterized protein {ECO:0000313|EMBL:KNA20858.1};	--	--	Transcriptional activator
gene-LOC110683636	2.4	3.04	3.04	0.04	0	0.05	165	205	184	3	0	3	101.411	6.664	1.77159e-23	7.60879e-21	up	NW_018743688.1	67002	71770	-	LOC110683636	--	K17604 zinc finger SWIM domain-containing protein 3 | (RefSeq) protein FAR-RED IMPAIRED RESPONSE 1-like (A)	protein FAR1-RELATED SEQUENCE 6-like isoform X1 [Chenopodium quinoa]	RecName: Full=Protein FAR-RED ELONGATED HYPOCOTYL 3;	SubName: Full=Uncharacterized protein {ECO:0000313|EMBL:ONH89763.1};	--	GO:0005634,nucleus; GO:0003700,DNA-binding transcription factor activity; GO:0008270,zinc ion binding; GO:0007623,circadian rhythm; GO:0010018,far-red light signaling pathway; GO:0042753,positive regulation of circadian rhythm; GO:0045893,positive regulation of transcription, DNA-templated; GO:0010017,red or far-red light signaling pathway; GO:0009585,red, far-red light phototransduction; GO:0010…	MULE transposase domain
gene-LOC110683639	3.68	3.99	2.08	1.54	1.36	1.61	163	173	81	67	58	69	2.299	1.201	0.00162325	0.0211337	up	NW_018743688.1	82888	89353	-	LOC110683639	--	K11091 U1 small nuclear ribonucleoprotein A | (RefSeq) U1 small nuclear ribonucleoprotein A (A)	uncharacterized protein LOC110683639 [Chenopodium quinoa]	RecName: Full=RNA-binding protein 2 {ECO:0000305};	SubName: Full=Uncharacterized protein {ECO:0000313|EMBL:KNA13750.1};	RNA binding protein (contains RRM repeats)	GO:0003723,RNA binding	RNA recognition motif. (a.k.a. RRM, RBD, or RNP domain)
gene-LOC110683659	0.23	0.5	0.39	0.06	0.06	0.06	8	17	12	2	2	2	6.558	2.713	0.00432772	0.0447505	up	NW_018743689.1	599598	604464	-	LOC110683659	--	--	uncharacterized protein LOC110683659 [Chenopodium quinoa]	--	SubName: Full=Uncharacterized protein {ECO:0000313|EMBL:KNA10379.1}; Flags: Fragment;	--	--	--
gene-LOC110683689	13.08	22.78	14.07	0.15	0.24	1.1	173	295	164	2	3	14	37.398	5.225	9.90065e-21	3.2362e-18	up	NW_018743691.1	4150987	4152452	-	LOC110683689	--	--	uncharacterized protein LOC110683689 [Chenopodium quinoa]	--	--	--	--	--
gene-LOC110683701	0.67	0.76	0.64	0.05	0.08	0.11	26	29	22	2	3	4	9.324	3.221	9.45676e-06	0.000266231	up	NW_018743691.1	484985	492359	+	LOC110683701	--	K14638 solute carrier family 15 (peptide/histidine transporter), member 3/4 | (RefSeq) protein NRT1/ PTR FAMILY 2.3-like (A)	protein NRT1/ PTR FAMILY 2.3-like [Chenopodium quinoa]	RecName: Full=Protein NRT1/ PTR FAMILY 2.3; Short=AtNPF2.3; AltName: Full=Probable nitrate excretion transporter 3; AltName: Full=Protein NAXT1-like 2;	SubName: Full=Uncharacterized protein {ECO:0000313|EMBL:KMS95534.1};	H+/oligopeptide symporter	GO:0016021,integral component of membrane; GO:0005886,plasma membrane; GO:0015112,nitrate transmembrane transporter activity; GO:0071472,cellular response to salt stress; GO:0042128,nitrate assimilation; GO:0015706,nitrate transport; GO:0006857,oligopeptide transport; GO:0009624,response to nematode	POT family
gene-LOC110683707	40.26	68.23	123.37	32.33	32.11	38.79	626	1039	1690	493	481	582	2.335	1.223	0.00179462	0.0228336	up	NW_018743691.1	921903	925276	+	LOC110683707	--	K02973 small subunit ribosomal protein S23e | (RefSeq) 40S ribosomal protein S23 (A)	40S ribosomal protein S23 [Chenopodium quinoa]	RecName: Full=40S ribosomal protein S23;	SubName: Full=Uncharacterized protein {ECO:0000313|EMBL:KRG95930.1, ECO:0000313|EnsemblPlants:GLYMA10G05660.1};	40S ribosomal protein S23	GO:0015935,small ribosomal subunit; GO:0003735,structural constituent of ribosome; GO:0006412,translation	Ribosomal protein S12/S23
gene-LOC110683732	22.27	28.2	23.9	8.08	6.21	8.49	838	1039	792	298	225	308	3.468	1.794	9.26711e-20	2.633e-17	up	NW_018743691.1	2038101	2041156	-	LOC110683732	--	K03231 elongation factor 1-alpha | (RefSeq) elongation factor 1-alpha-like (A)	elongation factor 1-alpha-like [Chenopodium quinoa]	RecName: Full=Elongation factor 1-alpha; Short=EF-1-alpha;	RecName: Full=Elongation factor 1-alpha {ECO:0000256|RuleBase:RU000325};	Translation elongation factor EF-1 alpha/Tu	GO:0005737,cytoplasm; GO:0005622,intracellular; GO:0005525,GTP binding; GO:0003924,GTPase activity; GO:0003746,translation elongation factor activity	Elongation factor Tu GTP binding domain
gene-LOC110683781	0.19	0.17	0.28	0	0	0	7	6	9	0	0	0	43.473	5.442	0.00142085	0.0191082	up	NW_018743691.1	3281397	3287326	+	LOC110683781	--	--	uncharacterized protein LOC110683781 [Chenopodium quinoa]	--	SubName: Full=Uncharacterized protein {ECO:0000313|EMBL:KNA18316.1};	--	GO:0003824,catalytic activity	Orn/Lys/Arg decarboxylase, major domain
gene-LOC110683782	1.19	1.05	1.91	0.33	0.44	0.27	81	70	115	22	29	18	4.081	2.029	3.12184e-05	0.000759606	up	NW_018743691.1	3294433	3299015	-	LOC110683782	--	K01087 trehalose 6-phosphate phosphatase [EC:3.1.3.12] | (RefSeq) trehalose-phosphate phosphatase A-like (A)	protein KINESIN LIGHT CHAIN-RELATED 2-like [Chenopodium quinoa]	RecName: Full=Protein KINESIN LIGHT CHAIN-RELATED 2 {ECO:0000303|PubMed:23204523}; AltName: Full=Kinesin light chain-like protein 1 {ECO:0000303|Ref.1}; Short=AtKLC1 {ECO:0000303|Ref.1};	SubName: Full=Uncharacterized protein {ECO:0000313|EMBL:KNA17424.1};	Kinesin light chain	GO:0005886,plasma membrane; GO:0009860,pollen tube growth; GO:0031347,regulation of defense response	Tetratricopeptide repeat
gene-LOC110683812	5.67	6.78	9.3	3.58	2.69	4.36	317	371	458	196	145	235	2.191	1.131	1.5302e-05	0.000407477	up	NW_018743691.1	3997455	4001661	-	LOC110683812	--	K13172 serine/arginine repetitive matrix protein 2 | (RefSeq) trichohyalin-like (A)	trichohyalin-like [Chenopodium quinoa]	--	SubName: Full=Uncharacterized protein {ECO:0000313|EMBL:KNA19783.1};	Splicing coactivator SRm160/300, subunit SRm300	--	cwf21 domain
gene-LOC110683826	1.51	1.97	1.81	0.42	0.49	0.71	55	70	58	15	17	25	3.501	1.808	4.51321e-06	0.000138801	up	NW_018743691.1	4332995	4334777	+	LOC110683826	--	--	--	--	--	--	--	--
gene-LOC110684050	38.38	81.51	49.24	22.27	26.7	37.77	1167	2427	1319	664	782	1108	2.053	1.038	0.000581428	0.00923286	up	NW_018743697.1	1061024	1064417	+	LOC110684050	--	K20628 expansin | (GenBank) expansin A10 (A)	expansin-A6-like [Chenopodium quinoa]	RecName: Full=Expansin-A4; Short=AtEXPA4; AltName: Full=Alpha-expansin-4; Short=At-EXP4; Short=AtEx4; AltName: Full=Ath-ExpAlpha-1.6; Flags: Precursor;	SubName: Full=Uncharacterized protein {ECO:0000313|EMBL:KNA07594.1};	--	GO:0005829,cytosol; GO:0005576,extracellular region; GO:0016020,membrane; GO:0009505,plant-type cell wall; GO:0009506,plasmodesma; GO:0009664,plant-type cell wall organization; GO:0006949,syncytium formation	Pollen allergen
gene-LOC110684112	81.01	68.77	99.41	48.3	35.95	28.61	1902	1581	2056	1112	813	648	2.284	1.191	0.000910509	0.0132927	up	NW_018743697.1	1671130	1672281	-	LOC110684112	--	K14841 ribosome biogenesis protein NSA1 | (RefSeq) WD repeat-containing protein DDB_G0290555 (A)	zinc finger protein ZAT12-like [Chenopodium quinoa]	RecName: Full=Zinc finger protein ZAT8;	SubName: Full=Uncharacterized protein {ECO:0000313|EMBL:KNA11901.1};	FOG: Zn-finger	GO:0005634,nucleus; GO:0003700,DNA-binding transcription factor activity; GO:0046872,metal ion binding; GO:0003676,nucleic acid binding; GO:0006355,regulation of transcription, DNA-templated; GO:0010200,response to chitin; GO:0006351,transcription, DNA-templated	C2H2-type zinc finger
gene-LOC110684121	1.73	1.94	1.11	0.41	0.21	0.69	60	66	34	14	7	23	4.074	2.027	9.69039e-05	0.00203829	up	NW_018743697.1	1763162	1765570	+	LOC110684121	--	--	uncharacterized protein LOC110684121 [Chenopodium quinoa]	--	SubName: Full=Uncharacterized protein {ECO:0000313|EMBL:KNA05913.1};	--	--	Protein of unknown function (DUF1635)
gene-LOC110684127	0.77	1.92	1.26	0.42	0.37	0.53	30	73	43	16	14	20	3.114	1.639	0.000785909	0.011829	up	NW_018743697.1	1786871	1790485	+	LOC110684127	--	K00423 L-ascorbate oxidase [EC:1.10.3.3] | (RefSeq) L-ascorbate oxidase (A)	F-box protein At5g03100-like [Chenopodium quinoa]	RecName: Full=F-box protein At5g03100;	SubName: Full=Uncharacterized protein {ECO:0000313|EMBL:KMS97958.1};	--	GO:0005777,peroxisome	F-box-like
gene-LOC110684151	0.24	0.87	0.65	0	0	0	5	18	12	0	0	0	66.572	6.057	0.000171143	0.00332701	up	NW_018742265.1	2603	5811	+	LOC110684151	--	--	--	--	--	--	--	--
gene-LOC110684285	0.6	0.52	0.42	0	0	0	13	11	8	0	0	0	62.707	5.971	0.000140128	0.00280552	up	NW_018742271.1	559588	561172	+	LOC110684285	--	K14510 serine/threonine-protein kinase CTR1 [EC:2.7.11.1] | (RefSeq) serine/threonine-protein kinase CTR1-like (A)	mitogen-activated protein kinase kinase kinase 12-like [Chenopodium quinoa]	RecName: Full=Serine/threonine-protein kinase STY46 {ECO:0000305}; EC=2.7.11.1 {ECO:0000269|PubMed:17090544}; AltName: Full=Serine/threonine/tyrosine-protein kinase 46 {ECO:0000303|PubMed:16429265};	SubName: Full=Uncharacterized protein {ECO:0000313|EMBL:KNA25892.1};	Tyrosine kinase specific for activated (GTP-bound) p21cdc42Hs	GO:0005829,cytosol; GO:0005524,ATP binding; GO:0004674,protein serine/threonine kinase activity; GO:0004712,protein serine/threonine/tyrosine kinase activity; GO:0004871,NA; GO:0009658,chloroplast organization; GO:0035556,intracellular signal transduction	Protein tyrosine kinase
gene-LOC110684296	2.24	2.29	1.94	0.09	0.6	0.04	105	105	80	4	27	2	8.337	3.059	0.000480809	0.00788945	up	NW_018743697.1	3504760	3508605	-	LOC110684296	--	K12638 3-epi-6-deoxocathasterone 23-monooxygenase [EC:1.14.14.147] | (RefSeq) 3-epi-6-deoxocathasterone 23-monooxygenase-like (A)	3-epi-6-deoxocathasterone 23-monooxygenase-like [Chenopodium quinoa]	RecName: Full=3-epi-6-deoxocathasterone 23-monooxygenase; EC=1.14.13.112; AltName: Full=Cytochrome P450 90D1;	SubName: Full=3-epi-6-deoxocathasterone 23-monooxygenase {ECO:0000313|RefSeq:XP_018821009.1};	Cytochrome P450 CYP4/CYP19/CYP26 subfamilies	GO:0005789,endoplasmic reticulum membrane; GO:0016021,integral component of membrane; GO:0102097,(22S)-22-hydroxy-5alpha-campestan-3-one C-23 hydroxylase activity; GO:0020037,heme binding; GO:0005506,iron ion binding; GO:0016709,oxidoreductase activity, acting on paired donors, with incorporation or reduction of molecular oxygen, NAD(P)H as one donor, and incorporation of one atom of oxygen; GO:0…	Cytochrome P450
gene-LOC110684365	20.32	29.47	37.07	11.83	7.29	17.66	359	510	577	205	124	301	2.577	1.366	1.08814e-05	0.000302646	up	NW_018742271.1	136747	138212	-	LOC110684365	--	--	uncharacterized protein At5g01610-like [Chenopodium quinoa]	--	SubName: Full=Uncharacterized protein {ECO:0000313|EMBL:KNA02678.1};	--	--	Protein of unknown function, DUF538
gene-LOC110684374	0.49	0.61	0.5	0	0	0	22	27	20	0	0	0	134.089	7.067	2.42913e-07	1.01039e-05	up	NW_018743697.1	4316080	4320077	-	LOC110684374	--	--	uncharacterized protein LOC110684374 [Chenopodium quinoa]	--	--	--	--	--
gene-LOC110684446	405.12	1146.83	145.13	59.73	6.43	96.32	10659	29548	3364	1541	163	2445	11.86	3.568	0.00105552	0.0150006	up	NW_018742271.1	389978	392146	-	LOC110684446	--	--	mannose/glucose-specific lectin-like [Chenopodium quinoa]	RecName: Full=Mannose/glucose-specific lectin; Flags: Fragment;	SubName: Full=Uncharacterized protein {ECO:0000313|EMBL:KNA06854.1};	--	GO:0005536,glucose binding; GO:0005537,mannose binding; GO:0000771,agglutination involved in conjugation	Jacalin-like lectin domain
gene-LOC110684452	0.34	0.22	0.63	0.02	0	0.03	14	9	23	1	0	1	26.103	4.706	0.000416171	0.00696497	up	NW_018743697.1	959269	961737	-	LOC110684452	--	K14494 DELLA protein | (RefSeq) DELLA protein RGL1-like (A)	scarecrow-like protein 30 [Chenopodium quinoa]	RecName: Full=Scarecrow-like protein 30; Short=AtSCL30; AltName: Full=GRAS family protein 17; Short=AtGRAS-17;	SubName: Full=Uncharacterized protein {ECO:0000313|EMBL:KNA11021.1};	--	GO:0005634,nucleus; GO:0003700,DNA-binding transcription factor activity; GO:0043565,sequence-specific DNA binding; GO:0006355,regulation of transcription, DNA-templated; GO:0010200,response to chitin; GO:0006351,transcription, DNA-templated	GRAS domain family
gene-LOC110684463	7.76	7.67	7.32	1.79	3.45	3.59	278	269	231	63	119	124	2.733	1.451	4.83889e-05	0.00111219	up	NW_018742271.1	461462	463219	+	LOC110684463	--	K12135 zinc finger protein CONSTANS | (RefSeq) hypothetical protein (A)	nucleolin-like [Chenopodium quinoa]	RecName: Full=B-box zinc finger protein 32 {ECO:0000303|PubMed:19920209}; AltName: Full=EIP6, EMF1-INTERACTING PROTEIN 6;	SubName: Full=Uncharacterized protein {ECO:0000313|EMBL:KNA20983.1};	--	GO:0005737,cytoplasm; GO:0005634,nucleus; GO:0003700,DNA-binding transcription factor activity; GO:0008270,zinc ion binding; GO:0009785,blue light signaling pathway; GO:0045892,negative regulation of transcription, DNA-templated; GO:0009640,photomorphogenesis; GO:0010017,red or far-red light signaling pathway; GO:0009909,regulation of flower development; GO:0006355,regulation of transcription, DN…	B-box zinc finger
gene-LOC110684538	3.56	0.21	5.38	0.06	0.2	0.34	301	17	401	5	16	28	17.349	4.117	1.16253e-05	0.000320204	up	NW_018743712.1	80992	85522	+	LOC110684538	--	K09874 aquaporin NIP | (RefSeq) probable aquaporin NIP5-1 (A)	pollen-specific leucine-rich repeat extensin-like protein 1 [Chenopodium quinoa]	--	SubName: Full=Uncharacterized protein {ECO:0000313|EMBL:KNA08392.1};	--	--	Zinc knuckle
gene-LOC110684541	0.86	0.04	0.85	0.02	0	0.13	40	2	35	1	0	6	14.144	3.822	0.0040696	0.0429716	up	NW_018743712.1	137994	143468	-	LOC110684541	--	K09775 uncharacterized protein | (RefSeq) uncharacterized protein LOC111283728 isoform X1 (A)	uncharacterized protein LOC110684541 [Chenopodium quinoa]	--	SubName: Full=Uncharacterized protein {ECO:0000313|EMBL:KNA05307.1};	--	GO:0016021,integral component of membrane; GO:0008375,acetylglucosaminyltransferase activity	Core-2/I-Branching enzyme
gene-LOC110684652	10.88	5.98	7.92	3.08	3.51	3.57	505	272	324	140	157	160	2.622	1.391	0.000219492	0.00412159	up	NW_018743732.1	388274	390551	+	LOC110684652	--	K12761 carbon catabolite-derepressing protein kinase [EC:2.7.11.1] | (RefSeq) CBL-interacting serine/threonine-protein kinase 11 (A)	CBL-interacting serine/threonine-protein kinase 11-like [Chenopodium quinoa]	RecName: Full=CBL-interacting serine/threonine-protein kinase 11; EC=2.7.11.1; AltName: Full=SNF1-related kinase 3.22; AltName: Full=SOS2-like protein kinase PKS5; AltName: Full=SOS3-interacting protein 4;	RecName: Full=Non-specific serine/threonine protein kinase {ECO:0000256|SAAS:SAAS00351747}; EC=2.7.11.1 {ECO:0000256|SAAS:SAAS00351747};	Serine/threonine protein kinase	GO:0005622,intracellular; GO:0005524,ATP binding; GO:0004672,protein kinase activity; GO:0004674,protein serine/threonine kinase activity; GO:0035556,intracellular signal transduction; GO:0018105,peptidyl-serine phosphorylation; GO:0018107,peptidyl-threonine phosphorylation; GO:0006468,protein phosphorylation; GO:0009268,response to pH	Protein kinase domain
gene-LOC110684699	33.29	17.32	24.81	11.89	9.46	8.33	2166	1104	1422	759	593	523	2.698	1.432	0.000335713	0.00588847	up	NW_018742275.1	148258	168110	+	LOC110684699	--	K00700 1,4-alpha-glucan branching enzyme [EC:2.4.1.18] | (RefSeq) 1,4-alpha-glucan-branching enzyme 2-2, chloroplastic/amyloplastic-like (A)	1,4-alpha-glucan-branching enzyme 2-2, chloroplastic/amyloplastic-like [Chenopodium quinoa]	RecName: Full=1,4-alpha-glucan-branching enzyme 1, chloroplastic/amyloplastic; EC=2.4.1.18; AltName: Full=Starch branching enzyme I; Flags: Precursor;	SubName: Full=Uncharacterized protein {ECO:0000313|EMBL:KNA13601.1};	1,4-alpha-glucan branching enzyme/starch branching enzyme II	GO:0009501,amyloplast; GO:0009507,chloroplast; GO:0003844,1,4-alpha-glucan branching enzyme activity; GO:0102752,1,4-alpha-glucan branching enzyme activity (using a glucosylated glycogenin as primer for glycogen synthesis); GO:0043169,cation binding; GO:0004553,hydrolase activity, hydrolyzing O-glycosyl compounds; GO:0009793,embryo development ending in seed dormancy; GO:0005978,glycogen biosynth…	Alpha amylase, C-terminal all-beta domain
gene-LOC110684722	2.88	3.77	4.83	1.28	1.43	1.75	46	59	68	20	22	27	2.721	1.444	0.000402987	0.006806	up	NW_018743754.1	959	2903	-	LOC110684722	--	--	--	--	--	--	--	--
gene-LOC110684745	30.39	29.01	26.09	7.23	6.31	3.59	1350	1262	1021	315	270	154	5.084	2.346	6.22943e-09	3.55627e-07	up	NW_018742275.1	445167	451668	+	LOC110684745	--	--	uncharacterized protein LOC110684745 [Chenopodium quinoa]	--	SubName: Full=Uncharacterized protein {ECO:0000313|EMBL:KNA03902.1};	--	--	Domain of unknown function (DUF4378)
gene-LOC110684752	1.21	2.67	1.65	0.65	0.33	1.17	49	106	59	26	13	46	2.807	1.489	0.00215668	0.0263336	up	NW_018742275.1	557055	561299	-	LOC110684752	--	K01193 beta-fructofuranosidase [EC:3.2.1.26] | (RefSeq) LOC109747879; beta-fructofuranosidase, insoluble isoenzyme 3-like (A)	UPF0481 protein At3g47200-like [Chenopodium quinoa]	RecName: Full=UPF0481 protein At3g47200;	SubName: Full=Uncharacterized protein {ECO:0000313|EMBL:KNA18694.1};	--	GO:0016021,integral component of membrane; GO:0005886,plasma membrane	Plant protein of unknown function
gene-LOC110684767	1.33	2.83	2.8	0	0	0	13	27	24	0	0	0	123.55	6.949	8.70626e-07	3.22542e-05	up	NW_018743783.1	604992	606278	+	LOC110684767	--	--	--	--	--	--	--	--
gene-LOC110684808	0.77	0.98	1.25	0.26	0.23	0.14	105	130	149	34	30	18	4.9	2.293	2.20673e-07	9.26224e-06	up	NW_018743783.1	1112009	1120383	+	LOC110684808	--	--	--	--	--	--	--	--
gene-LOC110684819	5.66	10.07	14.63	3.8	3.49	2.99	155	270	353	102	92	79	3.006	1.588	0.000106272	0.00220698	up	NW_018743783.1	1722449	1723792	-	LOC110684819	--	--	uncharacterized protein LOC110684819 [Chenopodium quinoa]	--	SubName: Full=Uncharacterized protein {ECO:0000313|EMBL:KNA03797.1};	--	--	Protein of unknown function (DUF1677)
gene-LOC110684830	1.51	1.52	1.62	0.66	0.56	1.08	95	94	90	41	34	66	2.2	1.137	0.000377242	0.00645681	up	NW_018743783.1	2341815	2346517	+	LOC110684830	--	--	--	--	--	--	--	--
gene-LOC110684834	6.45	7.26	8.11	2.69	2.27	4.24	186	205	206	76	63	118	2.576	1.365	1.39029e-07	6.1206e-06	up	NW_018743783.1	2438688	2443287	-	LOC110684834	--	K14855 ribosome assembly protein 4 | (RefSeq) notchless protein homolog (A)	notchless protein homolog, partial [Chenopodium quinoa]	RecName: Full=Notchless protein homolog {ECO:0000303|PubMed:23572950};	SubName: Full=Uncharacterized protein {ECO:0000313|EMBL:KNA23871.1};	Notchless-like WD40 repeat-containing protein	GO:0080008,Cul4-RING E3 ubiquitin ligase complex; GO:0005730,nucleolus; GO:0005840,ribosome; GO:0009553,embryo sac development; GO:0000027,ribosomal large subunit assembly	WD domain, G-beta repeat
gene-LOC110684906	0.9	1.69	1.88	0.34	0.25	0.69	19	35	35	7	5	14	3.819	1.933	0.00141298	0.0190265	up	NW_018743787.1	416103	419112	-	LOC110684906	--	--	--	--	--	--	--	--
gene-LOC110684924	0.37	0.62	0.69	0.11	0.1	0.36	24	39	39	7	6	22	3.328	1.734	0.00416252	0.0435791	up	NW_018742287.1	209682	212826	+	LOC110684924	--	--	uncharacterized protein LOC110684924 isoform X1 [Chenopodium quinoa]	--	SubName: Full=Uncharacterized protein {ECO:0000313|EMBL:KNA10549.1}; Flags: Fragment;	--	--	--
gene-LOC110685025	2.56	2.29	1.17	0.78	0.23	0.36	104	91	42	31	9	14	4.727	2.241	0.000213985	0.00404284	up	NW_018743791.1	755218	758088	-	LOC110685025	--	K23810 (E)-8-carboxylinalool synthase [EC:1.14.14.-] | (RefSeq) geraniol 8-hydroxylase (A)	cytochrome P450 76AD1-like [Chenopodium quinoa]	RecName: Full=Cytochrome P450 76AD1 {ECO:0000303|PubMed:22660548}; EC=1.14.-.- {ECO:0000305};	SubName: Full=Cytochrome P450 CYP76AD5 {ECO:0000313|EMBL:AJD87473.1};	Cytochrome P450 CYP2 subfamily	GO:0016021,integral component of membrane; GO:0020037,heme binding; GO:0005506,iron ion binding; GO:0004497,monooxygenase activity; GO:0016705,oxidoreductase activity, acting on paired donors, with incorporation or reduction of molecular oxygen	Cytochrome P450
gene-LOC110685031	7.6	6.89	6.29	2.39	2.64	1.93	221	196	161	68	74	54	3.106	1.635	8.79448e-06	0.000249536	up	NW_018743791.1	784184	790125	+	LOC110685031	--	K23871 putative pectin methylesterase [EC:2.1.1.-] | (RefSeq) uncharacterized protein At3g49720-like (A)	uncharacterized protein At3g49720-like [Chenopodium quinoa]	RecName: Full=Uncharacterized protein At3g49720;	SubName: Full=Uncharacterized protein {ECO:0000313|EMBL:KNA15736.1};	--	GO:0009535,chloroplast thylakoid membrane; GO:0005768,endosome; GO:0005794,Golgi apparatus; GO:0016021,integral component of membrane; GO:0016020,membrane; GO:0005886,plasma membrane; GO:0005802,trans-Golgi network; GO:0005774,vacuolar membrane; GO:0040007,growth; GO:0045489,pectin biosynthetic process	Methyltransferase domain
gene-LOC110685173	1.38	0.62	3.19	0.06	0.19	0.29	45	20	92	2	6	9	10.547	3.399	2.7328e-05	0.000678397	up	NW_018743792.1	885186	888276	-	LOC110685173	--	--	--	--	--	--	--	--
gene-LOC110685202	5.16	5.87	7.34	0.86	0.52	0.74	123	137	154	20	12	17	9.214	3.204	2.08381e-17	4.34846e-15	up	NW_018743792.1	2741072	2748817	+	LOC110685202	--	K17345 tetraspanin-5 | (RefSeq) tetraspanin-19-like (A)	tetraspanin-19 isoform X1 [Chenopodium quinoa]	RecName: Full=Tetraspanin-19; AltName: Full=TOM2A homologous protein 3;	SubName: Full=Tetraspannin domain-containing protein {ECO:0000313|EMBL:GAV70435.1};	--	GO:0016021,integral component of membrane; GO:0005774,vacuolar membrane	Tetraspanin family
gene-LOC110685221	0.46	0.52	2.73	0.21	0.16	0.11	9	10	47	4	3	2	7.955	2.992	0.00328449	0.0366513	up	NW_018743792.1	5258257	5261155	-	LOC110685221	--	K15200 general transcription factor 3C polypeptide 2 | (RefSeq) uncharacterized protein LOC110729340 (A)	AT-rich interactive domain-containing protein 4-like isoform X1 [Chenopodium quinoa]	RecName: Full=AT-rich interactive domain-containing protein 4; Short=ARID domain-containing protein 4;	SubName: Full=Uncharacterized protein {ECO:0000313|EMBL:KNA21403.1};	--	GO:0005634,nucleus; GO:0003677,DNA binding; GO:0046872,metal ion binding; GO:0006355,regulation of transcription, DNA-templated; GO:0006351,transcription, DNA-templated	--
gene-LOC110685230	10.41	9.78	3.44	2.46	2.29	3.14	151	139	44	35	32	44	3.252	1.702	0.000914847	0.0133297	up	NW_018743792.1	6437981	6438814	-	LOC110685230	--	--	uncharacterized protein LOC110685230 [Chenopodium quinoa]	--	SubName: Full=Uncharacterized protein {ECO:0000313|EMBL:OVA14505.1};	--	GO:0016021,integral component of membrane	--
gene-LOC110685327	0.38	4.51	0.23	0.14	0.12	0.28	17	198	9	6	5	12	10.018	3.325	0.00121565	0.0168169	up	NW_018743812.1	206148	214131	+	LOC110685327	--	K00028 malate dehydrogenase (decarboxylating) [EC:1.1.1.39] | (RefSeq) LOW QUALITY PROTEIN: NAD-dependent malic enzyme 59 kDa isoform, mitochondrial-like (A)	LOW QUALITY PROTEIN: NAD-dependent malic enzyme 59 kDa isoform, mitochondrial-like [Chenopodium quinoa]	RecName: Full=NAD-dependent malic enzyme 59 kDa isoform, mitochondrial; Short=NAD-ME; EC=1.1.1.39; Flags: Precursor;	RecName: Full=Malic enzyme {ECO:0000256|RuleBase:RU003426};	NADP+-dependent malic enzyme	GO:0005759,mitochondrial matrix; GO:0004471,malate dehydrogenase (decarboxylating) (NAD+) activity; GO:0046872,metal ion binding; GO:0051287,NAD binding	Malic enzyme, NAD binding domain
gene-LOC110685332	0.92	8.86	0.09	0.15	0.16	0.09	81	767	7	13	14	8	22.91	4.518	0.00199528	0.0248811	up	NW_018743812.1	232011	245638	-	LOC110685332	--	--	K(+) efflux antiporter 2, chloroplastic-like [Chenopodium quinoa]	RecName: Full=K(+) efflux antiporter 1, chloroplastic {ECO:0000303|PubMed:11500563}; Short=AtKEA1 {ECO:0000303|PubMed:11500563}; Flags: Precursor;	SubName: Full=Uncharacterized protein {ECO:0000313|EMBL:KNA15026.1};	Predicted K+/H+-antiporter	GO:0009507,chloroplast; GO:0009941,chloroplast envelope; GO:0031969,chloroplast membrane; GO:0016021,integral component of membrane; GO:0016020,membrane; GO:0015386,potassium:proton antiporter activity; GO:0009658,chloroplast organization; GO:0010109,regulation of photosynthesis	Sodium/hydrogen exchanger family
gene-LOC110685338	1.32	6.58	0.78	0.11	0.07	0.07	73	357	38	6	4	4	33.415	5.062	1.51941e-09	9.62621e-08	up	NW_018743812.1	312108	319895	+	LOC110685338	--	K12614 ATP-dependent RNA helicase DDX6/DHH1 [EC:3.6.4.13] | (RefSeq) DEAD-box ATP-dependent RNA helicase 8-like isoform X1 (A)	DEAD-box ATP-dependent RNA helicase 8-like isoform X1 [Chenopodium quinoa]	RecName: Full=DEAD-box ATP-dependent RNA helicase 8; EC=3.6.4.13;	SubName: Full=DEAD-box ATP-dependent RNA helicase 8-like {ECO:0000313|RefSeq:XP_018845393.1};	ATP-dependent RNA helicase	GO:0010494,cytoplasmic stress granule; GO:0005730,nucleolus; GO:0000932,P-body; GO:0005524,ATP binding; GO:0004004,ATP-dependent RNA helicase activity; GO:0003729,mRNA binding; GO:0033962,cytoplasmic mRNA processing body assembly; GO:0006397,mRNA processing; GO:0051028,mRNA transport; GO:0006417,regulation of translation; GO:0010501,RNA secondary structure unwinding; GO:0016032,viral process	DEAD/DEAH box helicase
gene-LOC110685344	0.04	0.91	0.05	0	0	0	2	40	2	0	0	0	78.212	6.289	0.00153768	0.0202624	up	NW_018743812.1	365553	372160	+	LOC110685344	--	K15440 tRNA-specific adenosine deaminase 1 [EC:3.5.4.34] | (RefSeq) tRNA-specific adenosine deaminase 1-like isoform X1 (A)	tRNA-specific adenosine deaminase 1-like isoform X1 [Chenopodium quinoa]	--	SubName: Full=Uncharacterized protein {ECO:0000313|EMBL:KNA04574.1};	tRNA-specific adenosine deaminase 1	GO:0004000,adenosine deaminase activity; GO:0003723,RNA binding; GO:0006396,RNA processing	Adenosine-deaminase (editase) domain
gene-LOC110685413	18.22	10.5	18.93	0.37	0.31	0.46	248	140	227	5	4	6	45.753	5.516	1.74771e-23	7.59451e-21	up	NW_018743813.1	2403309	2404459	+	LOC110685413	--	--	--	--	--	--	--	--
gene-LOC110685422	84.47	66.37	63.78	19.55	14.71	19.41	2837	2183	1887	644	476	629	4.307	2.107	1.56999e-14	2.13195e-12	up	NW_018743813.1	736246	741924	+	LOC110685422	--	K09060 plant G-box-binding factor | (RefSeq) bZIP transcription factor 16-like (A)	UV-B-induced protein At3g17800, chloroplastic-like [Chenopodium quinoa]	RecName: Full=UV-B-induced protein At3g17800, chloroplastic {ECO:0000305}; Flags: Precursor;	SubName: Full=Uncharacterized protein {ECO:0000313|EMBL:KNA17639.1};	--	GO:0009507,chloroplast; GO:0010193,response to ozone; GO:0010224,response to UV-B; GO:0009611,response to wounding	Protein of unknown function (DUF760)
gene-LOC110685432	0.61	1.67	1.25	0	0	0	31	83	56	0	0	0	324.668	8.343	2.3539e-10	1.71486e-08	up	NW_018743813.1	2886328	2890796	+	LOC110685432	--	--	--	--	--	--	--	--
gene-LOC110685470	0.58	0.64	0.64	0.3	0.19	0.4	42	45	41	21	13	28	2.289	1.194	0.00494087	0.0496318	up	NW_018743814.1	216903	221799	-	LOC110685470	--	--	--	--	--	--	--	--
gene-LOC110685540	10.15	9.15	8.93	2.48	3.35	8.01	280	247	217	67	89	213	2.309	1.207	0.00233153	0.0280147	up	NW_018743828.1	968819	970704	+	LOC110685540	--	K16290 xylem cysteine proteinase [EC:3.4.22.-] | (RefSeq) cysteine protease XCP2-like (A)	cysteine protease XCP2-like [Chenopodium quinoa]	RecName: Full=Cysteine protease XCP2 {ECO:0000305}; EC=3.4.22.-; AltName: Full=Xylem cysteine peptidase 2 {ECO:0000303|PubMed:10889267}; Short=AtXCP2 {ECO:0000303|PubMed:10889267}; Flags: Precursor;	SubName: Full=Uncharacterized protein {ECO:0000313|EMBL:KNA17197.1};	Cysteine proteinase Cathepsin L	GO:0005618,cell wall; GO:0005615,extracellular space; GO:0005764,lysosome; GO:0005886,plasma membrane; GO:0004197,cysteine-type endopeptidase activity; GO:0042742,defense response to bacterium; GO:0010623,programmed cell death involved in cell development; GO:0051603,proteolysis involved in cellular protein catabolic process	Papain family cysteine protease
gene-LOC110685634	64.01	59.79	39.49	14.45	10.93	18.87	2335	2136	1269	517	384	664	4.04	2.014	5.7376e-12	5.31138e-10	up	NW_018743850.1	4428047	4429836	-	LOC110685634	--	--	--	--	--	--	--	--
gene-LOC110685786	6.18	6.01	6.29	2.75	2.24	4.5	356	339	319	155	124	250	2.144	1.1	1.09265e-05	0.000303445	up	NW_018743850.1	460861	468750	+	LOC110685786	--	K00234 succinate dehydrogenase (ubiquinone) flavoprotein subunit [EC:1.3.5.1] | (RefSeq) succinate dehydrogenase [ubiquinone] flavoprotein subunit, mitochondrial-like (A)	succinate dehydrogenase [ubiquinone]	RecName: Full=Succinate dehydrogenase [ubiquinone] flavoprotein subunit 1, mitochondrial; EC=1.3.5.1 {ECO:0000250|UniProtKB:P31040}; AltName: Full=Flavoprotein subunit 1 of complex II; Short=FP; Flags: Precursor;	RecName: Full=Succinate dehydrogenase [ubiquinone] flavoprotein subunit, mitochondrial {ECO:0000256|RuleBase:RU362051}; EC=1.3.5.1 {ECO:0000256|RuleBase:RU362051};	Succinate dehydrogenase, flavoprotein subunit	GO:0005618,cell wall; GO:0005749,mitochondrial respiratory chain complex II, succinate dehydrogenase complex (ubiquinone); GO:0005739,mitochondrion; GO:0045273,respiratory chain complex II; GO:0005524,ATP binding; GO:0050897,cobalt ion binding; GO:0009055,electron transfer activity; GO:0050660,flavin adenine dinucleotide binding; GO:0008177,succinate dehydrogenase (ubiquinone) activity; GO:000010…	FAD binding domain
gene-LOC110685800	3.05	2.31	1.68	0.69	0.81	0.77	136	101	66	30	35	33	3.316	1.73	8.06917e-05	0.00173887	up	NW_018743850.1	586350	591372	-	LOC110685800	--	K08145 MFS transporter, SP family, solute carrier family 2 (facilitated glucose transporter), member 8 | (RefSeq) sugar transporter ERD6-like 6 (A)	sugar transporter ERD6-like 6 isoform X1 [Chenopodium quinoa]	RecName: Full=Sugar transporter ERD6-like 6;	SubName: Full=Uncharacterized protein {ECO:0000313|EMBL:KNA13733.1};	Predicted transporter (major facilitator superfamily)	GO:0005794,Golgi apparatus; GO:0016021,integral component of membrane; GO:0009705,plant-type vacuole membrane; GO:0005774,vacuolar membrane; GO:0005355,glucose transmembrane transporter activity; GO:0005351,carbohydrate:proton symporter activity; GO:0042593,glucose homeostasis; GO:0046323,glucose import; GO:0035428,NA; GO:0010030,positive regulation of seed germination	Sugar (and other) transporter
gene-LOC110685836	0.7	1.66	0.82	0.38	0.32	0.34	32	74	33	17	14	15	3.16	1.66	0.00152073	0.0201179	up	NW_018743850.1	931994	934391	+	LOC110685836	--	K08900 mitochondrial chaperone BCS1 | (RefSeq) hypothetical protein (A)	AAA-ATPase At3g50940-like isoform X1 [Chenopodium quinoa]	RecName: Full=Protein HYPER-SENSITIVITY-RELATED 4 {ECO:0000303|PubMed:15181213}; Short=AtHSR4 {ECO:0000303|PubMed:15181213}; EC=3.6.1.3 {ECO:0000250|UniProtKB:Q9FLD5}; AltName: Full=BCS1-like protein;	SubName: Full=Uncharacterized protein {ECO:0000313|EMBL:KNA10079.1};	AAA+-type ATPase	GO:0016021,integral component of membrane; GO:0005740,mitochondrial envelope; GO:0005741,mitochondrial outer membrane; GO:0005739,mitochondrion; GO:0005524,ATP binding; GO:0016887,ATPase activity; GO:0042802,identical protein binding; GO:0008219,cell death; GO:0009626,plant-type hypersensitive response; GO:0009617,response to bacterium; GO:0002237,response to molecule of bacterial origin; GO:0009…	Domain associated at C-terminal with AAA
gene-LOC110685855	2.42	3.11	4.2	1.01	0.84	1.67	152	191	232	62	51	101	2.994	1.582	5.75066e-07	2.22672e-05	up	NW_018743850.1	1085305	1089521	+	LOC110685855	--	K18171 COX assembly mitochondrial protein 1 | (RefSeq) protein GAMETE EXPRESSED 1 (A)	protein GAMETE EXPRESSED 1-like [Chenopodium quinoa]	RecName: Full=Protein GAMETE EXPRESSED 1; Flags: Precursor;	SubName: Full=Uncharacterized protein {ECO:0000313|EMBL:KNA13763.1};	--	GO:0005887,integral component of plasma membrane; GO:0005886,plasma membrane; GO:0042802,identical protein binding; GO:0009793,embryo development ending in seed dormancy; GO:0009553,embryo sac development; GO:0009555,pollen development	Dolichol-phosphate mannosyltransferase subunit 3 (DPM3)
gene-LOC110685914	0.24	0.84	1.11	0	0	0.13	8	27	32	0	0	4	19.761	4.305	0.000461328	0.00762057	up	NW_018743850.1	2073347	2076138	+	LOC110685914	--	--	--	--	--	--	--	--
gene-LOC110685970	2.69	2.17	12.64	0.56	0.37	0.57	137	108	567	28	18	28	12.361	3.628	6.52682e-08	3.04772e-06	up	NW_018743850.1	3255205	3258991	+	LOC110685970	--	--	--	--	--	--	--	--
gene-LOC110685995	0.21	0.43	0.53	0.02	0	0	9	18	20	1	0	0	46.839	5.55	0.000129066	0.00261358	up	NW_018743850.1	3721472	3732440	-	LOC110685995	--	--	uncharacterized protein LOC110685995 isoform X1 [Chenopodium quinoa]	--	SubName: Full=Uncharacterized protein {ECO:0000313|EMBL:KNA12514.1};	--	--	Plant transposase (Ptta/En/Spm family)
gene-LOC110686001	3.04	3.78	3.76	0.74	0.62	2.03	101	123	110	24	20	65	3.505	1.81	1.6281e-05	0.000428928	up	NW_018743850.1	3791054	3793539	-	LOC110686001	--	--	--	--	--	--	--	--
gene-LOC110686019	0.79	0.32	0.84	0.14	0.12	0.21	28	11	26	5	4	7	4.594	2.2	0.0035654	0.0391366	up	NW_018743850.1	4409360	4411360	+	LOC110686019	--	--	--	--	--	--	--	--
gene-LOC110686021	35.87	20.69	21.11	1.83	2.3	1.39	2624	1482	1360	131	162	98	14.687	3.876	1.53796e-18	3.68871e-16	up	NW_018743850.1	4450505	4454093	-	LOC110686021	--	K23260 scopoletin glucosyltransferase [EC:2.4.1.128] | (RefSeq) scopoletin glucosyltransferase-like (A)	scopoletin glucosyltransferase-like [Chenopodium quinoa]	RecName: Full=Scopoletin glucosyltransferase; EC=2.4.1.128; AltName: Full=Phenylpropanoid:glucosyltransferase 1;	SubName: Full=Uncharacterized protein {ECO:0000313|EMBL:KNA05928.1};	UDP-glucuronosyl and UDP-glucosyl transferase	GO:0042802,identical protein binding; GO:0050275,scopoletin glucosyltransferase activity; GO:0008152,metabolic process	UDP-glucoronosyl and UDP-glucosyl transferase
gene-LOC110686024	12.33	10.33	3.58	1.54	1.79	1.09	645	529	165	79	90	55	6.168	2.625	1.64882e-06	5.64418e-05	up	NW_018743850.1	4495150	4497716	-	LOC110686024	--	--	--	--	--	--	--	--
gene-LOC110686055	2.81	0.31	7.67	0.03	0.06	0.09	101	11	243	1	2	3	68.386	6.096	2.42064e-08	1.22814e-06	up	NW_018743850.1	5215747	5221393	+	LOC110686055	--	--	uncharacterized protein LOC110686055 [Chenopodium quinoa]	--	SubName: Full=Uncharacterized protein {ECO:0000313|EMBL:KMS64530.1};	--	--	--
gene-LOC110686070	3.83	0.02	12.56	0	0	0	230	1	664	0	0	0	1844.65	10.849	0.000265989	0.00483018	up	NW_018743850.1	5426605	5430668	+	LOC110686070	--	--	--	--	--	--	--	--
gene-LOC110686077	1.3	1.73	1.88	0	0.15	0.26	36	47	46	0	4	7	13.041	3.705	5.05045e-07	1.9845e-05	up	NW_018743850.1	5554729	5556092	+	LOC110686077	--	K22312 hydroxyjasmonate sulfotransferase [EC:2.8.2.39] | (RefSeq) cytosolic sulfotransferase 15-like (A)	cytosolic sulfotransferase 12-like [Chenopodium quinoa]	RecName: Full=Cytosolic sulfotransferase 5; Short=AtSOT5; EC=2.8.2.-; AltName: Full=Flavonoid 7-sulfotransferase 3a; Short=AtST3a;	RecName: Full=Sulfotransferase {ECO:0000256|RuleBase:RU361155}; EC=2.8.2.- {ECO:0000256|RuleBase:RU361155};	Sulfotransferase	GO:0005737,cytoplasm; GO:1990135,flavonoid sulfotransferase activity; GO:0008146,sulfotransferase activity; GO:0009812,flavonoid metabolic process	Sulfotransferase domain
gene-LOC110686079	0.8	0.93	1.42	0	0.02	0.02	35	40	55	0	1	1	71.38	6.157	9.97039e-08	4.48558e-06	up	NW_018743850.1	5604338	5607035	-	LOC110686079	--	K23288 syndetin | (RefSeq) uncharacterized LOC105761952 (A)	uncharacterized protein LOC110686079 [Chenopodium quinoa]	--	SubName: Full=Putative gag-polypeptide of LTR copia-type {ECO:0000313|EMBL:OTF95102.1};	FOG: Transposon-encoded proteins with TYA, reverse transcriptase, integrase domains in various combinations	--	gag-polypeptide of LTR copia-type
gene-LOC110686134	0.58	0.32	0.3	0	0	0	22	12	10	0	0	0	87.266	6.447	2.2355e-05	0.000571026	up	NW_018743850.1	6481211	6487482	+	LOC110686134	--	K01188 beta-glucosidase [EC:3.2.1.21] | (RefSeq) beta-glucosidase 40 (A)	beta-glucosidase 6-like isoform X1 [Chenopodium quinoa]	RecName: Full=Beta-glucosidase 6 {ECO:0000305}; Short=Os3bglu6 {ECO:0000303|PubMed:17196101}; EC=3.2.1.21 {ECO:0000269|PubMed:19587102}; Flags: Precursor;	SubName: Full=Uncharacterized protein {ECO:0000313|EMBL:KNA14425.1};	Beta-glucosidase, lactase phlorizinhydrolase, and related proteins	GO:0005576,extracellular region; GO:0033907,beta-D-fucosidase activity; GO:0004565,beta-galactosidase activity; GO:0080083,beta-gentiobiose beta-glucosidase activity; GO:0008422,beta-glucosidase activity; GO:0080079,cellobiose glucosidase activity; GO:0042973,glucan endo-1,3-beta-D-glucosidase activity; GO:0016798,hydrolase activity, acting on glycosyl bonds; GO:0102483,scopolin beta-glucosidase …	Glycosyl hydrolase family 1
gene-LOC110686141	29.19	32.72	27.65	17.16	11.2	19.94	2124	2331	1772	1224	785	1400	2.008	1.006	1.83702e-06	6.20934e-05	up	NW_018743850.1	6567948	6579294	-	LOC110686141	--	K00688 glycogen phosphorylase [EC:2.4.1.1] | (RefSeq) alpha-1,4 glucan phosphorylase L-2 isozyme, chloroplastic/amyloplastic-like isoform X1 (A)	alpha-1,4 glucan phosphorylase L-2 isozyme, chloroplastic/amyloplastic-like isoform X1 [Chenopodium quinoa]	RecName: Full=Alpha-1,4 glucan phosphorylase L-2 isozyme, chloroplastic/amyloplastic; EC=2.4.1.1; AltName: Full=Starch phosphorylase L-2; Flags: Precursor;	RecName: Full=Alpha-1,4 glucan phosphorylase {ECO:0000256|RuleBase:RU000587}; EC=2.4.1.1 {ECO:0000256|RuleBase:RU000587};	Glycogen phosphorylase	GO:0009501,amyloplast; GO:0009507,chloroplast; GO:0008184,glycogen phosphorylase activity; GO:0102250,linear malto-oligosaccharide phosphorylase activity; GO:0030170,pyridoxal phosphate binding; GO:0102499,SHG alpha-glucan phosphorylase activity; GO:0005975,carbohydrate metabolic process	Carbohydrate phosphorylase
gene-LOC110686149	2.99	4.34	3.73	0.52	0.72	1.22	99	141	109	17	23	39	4.846	2.277	4.97038e-10	3.43794e-08	up	NW_018743850.1	6686577	6689341	-	LOC110686149	--	--	uncharacterized protein LOC110686149 [Chenopodium quinoa]	--	SubName: Full=Uncharacterized protein {ECO:0000313|EMBL:KNA21093.1};	--	GO:0016021,integral component of membrane; GO:0046872,metal ion binding	RING-type zinc-finger
gene-LOC110686151	297.78	254.84	168.17	69.1	91.43	53.21	5656	4740	2814	1287	1673	975	3.458	1.79	2.13064e-05	0.00054689	up	NW_018743850.1	6722246	6723177	-	LOC110686151	--	--	nodulin-related protein 1-like [Chenopodium quinoa]	RecName: Full=Nodulin-related protein 1 {ECO:0000303|PubMed:20016941}; Short=AtNRP1 {ECO:0000303|PubMed:20016941}; AltName: Full=RPS2-interacting protein 11 {ECO:0000303|Ref.5};	SubName: Full=Uncharacterized protein {ECO:0000313|EMBL:KNA19117.1};	--	GO:0009738,abscisic acid-activated signaling pathway; GO:0006952,defense response; GO:1900426,positive regulation of defense response to bacterium; GO:0009617,response to bacterium; GO:0009409,response to cold; GO:0009408,response to heat; GO:0009651,response to salt stress	--
gene-LOC110686178	0.35	0.46	0.63	0	0	0	10	13	16	0	0	0	76.327	6.254	3.33858e-05	0.000803346	up	NW_018743850.1	7199996	7202594	-	LOC110686178	--	--	putative F-box protein At3g23950 [Chenopodium quinoa]	RecName: Full=F-box protein At5g07610;	SubName: Full=Uncharacterized protein {ECO:0000313|EMBL:KNA25779.1};	--	--	F-box-like
gene-LOC110686179	0.13	0.23	0.27	0	0	0	9	15	16	0	0	0	77.777	6.281	3.07964e-05	0.000749832	up	NW_018743850.1	7205213	7209376	-	LOC110686179	--	--	F-box protein At5g49610-like [Chenopodium quinoa]	RecName: Full=F-box protein At5g49610;	SubName: Full=Uncharacterized protein {ECO:0000313|EMBL:KNA25776.1};	--	GO:0016567,protein ubiquitination	F-box domain
gene-LOC110686218	4.01	4.7	3.22	1.59	0.4	1.76	116	133	82	45	11	49	3.552	1.829	0.000216918	0.00408988	up	NW_018743850.1	7662745	7673893	-	LOC110686218	--	--	elongation of fatty acids protein 3-like [Chenopodium quinoa]	RecName: Full=Elongation of fatty acids protein 3-like; Short=Protein ELO3-like; EC=2.3.1.-; AltName: Full=Protein HIGH EXPRESSION OF OSMOTICALLY RESPONSIVE GENES 3; AltName: Full=Very long-chain fatty acid condensing enzyme HOS3; Short=VLCFA condensing enzyme HOS3;	SubName: Full=Uncharacterized protein {ECO:0000313|EMBL:KNA15430.1};	Fatty acyl-CoA elongase/Polyunsaturated fatty acid specific elongation enzyme	GO:0030176,integral component of endoplasmic reticulum membrane; GO:0009922,fatty acid elongase activity; GO:0071215,cellular response to abscisic acid stimulus; GO:0030497,fatty acid elongation; GO:0034625,fatty acid elongation, monounsaturated fatty acid; GO:0034626,fatty acid elongation, polyunsaturated fatty acid; GO:0019367,fatty acid elongation, saturated fatty acid; GO:0030148,sphingolipid…	GNS1/SUR4 family
gene-LOC110686231	9.01	10.94	13.34	3.3	5.61	5.72	470	559	613	169	282	288	2.38	1.251	0.000104334	0.00217231	up	NW_018743850.1	7827304	7830599	-	LOC110686231	--	--	BTB/POZ domain-containing protein At3g50780-like [Chenopodium quinoa]	RecName: Full=BTB/POZ domain-containing protein At3g50780;	SubName: Full=Uncharacterized protein {ECO:0000313|EMBL:EEE90645.1};	--	GO:0016567,protein ubiquitination	BTB/POZ domain
gene-LOC110686281	2.53	2.85	3.36	0.71	0.78	1.23	47	52	55	13	14	22	3.457	1.79	2.843e-05	0.000703343	up	NW_018743850.1	2615840	2616856	+	LOC110686281	--	K20098 DNA excision repair protein ERCC-6-like 2 [EC:3.6.4.-] | (RefSeq) DNA repair and recombination RAD26-like protein, putative (A)	O-acyltransferase WSD1-like [Chenopodium quinoa]	RecName: Full=O-acyltransferase WSD1; AltName: Full=Diacylglycerol O-acyltransferase; Short=DGAT; EC=2.3.1.20; AltName: Full=Long-chain-alcohol O-fatty-acyltransferase; EC=2.3.1.75; AltName: Full=Wax synthase; Short=WS;	SubName: Full=Uncharacterized protein {ECO:0000313|EMBL:KNA12681.1};	--	GO:0005783,endoplasmic reticulum; GO:0005789,endoplasmic reticulum membrane; GO:0016021,integral component of membrane; GO:0005886,plasma membrane; GO:0102966,arachidoyl-CoA:1-dodecanol O-acyltransferase activity; GO:0004144,diacylglycerol O-acyltransferase activity; GO:0047196,long-chain-alcohol O-fatty-acyltransferase activity; GO:0103095,wax ester synthase activity; GO:0019432,triglyceride bio…	Wax ester synthase-like Acyl-CoA acyltransferase domain
gene-LOC110686282	2.79	3.08	3.76	0.92	0.63	1.95	37	40	44	12	8	25	3.051	1.609	0.001444	0.0193174	up	NW_018743850.1	2617598	2619408	+	LOC110686282	--	--	uncharacterized protein LOC110686282 [Chenopodium quinoa]	--	SubName: Full=Uncharacterized protein {ECO:0000313|EMBL:KNA12680.1};	--	GO:0004144,diacylglycerol O-acyltransferase activity; GO:0045017,glycerolipid biosynthetic process	Protein of unknown function (DUF1298)
gene-LOC110686492	0.31	0.43	0.77	0.02	0	0	19	26	42	1	0	0	87.801	6.456	2.3968e-06	7.88318e-05	up	NW_018743863.1	152007	155933	-	LOC110686492	--	K19984 exocyst complex component 5 | (RefSeq) uncharacterized protein LOC113272286 (A)	uncharacterized protein LOC110686492 [Chenopodium quinoa]	RecName: Full=Zinc finger BED domain-containing protein RICESLEEPER 4; AltName: Full=Transposase-like protein RICESLEEPER 4;	SubName: Full=Uncharacterized protein {ECO:0000313|EMBL:KNA20152.1};	Tam3-transposase (Ac family)	GO:0005634,nucleus; GO:0003700,DNA-binding transcription factor activity; GO:0046872,metal ion binding; GO:0046983,protein dimerization activity; GO:0000977,RNA polymerase II regulatory region sequence-specific DNA binding; GO:0009791,post-embryonic development; GO:0006357,regulation of transcription by RNA polymerase II; GO:0006351,transcription, DNA-templated	BED zinc finger
gene-LOC110686562	8.26	18.05	12.6	5.01	4.51	7.47	479	1025	644	285	252	418	2.427	1.279	8.47916e-06	0.000242404	up	NW_018743878.1	522637	525482	-	LOC110686562	--	K09840 9-cis-epoxycarotenoid dioxygenase [EC:1.13.11.51] | (RefSeq) 9-cis-epoxycarotenoid dioxygenase NCED1, chloroplastic-like (A)	9-cis-epoxycarotenoid dioxygenase NCED1, chloroplastic-like [Chenopodium quinoa]	RecName: Full=9-cis-epoxycarotenoid dioxygenase NCED1, chloroplastic; EC=1.13.11.51; AltName: Full=PvNCED1; Flags: Precursor;	SubName: Full=Uncharacterized protein {ECO:0000313|EMBL:KNA11963.1};	Beta, beta-carotene 15,15'-dioxygenase and related enzymes	GO:0009535,chloroplast thylakoid membrane; GO:0045549,9-cis-epoxycarotenoid dioxygenase activity; GO:0046872,metal ion binding; GO:0009688,abscisic acid biosynthetic process	Retinal pigment epithelial membrane protein
gene-LOC110686622	43.98	36.6	40.61	21.18	14.06	15.47	1529	1246	1244	722	471	519	2.529	1.338	1.04807e-05	0.000292161	up	NW_018743893.1	33397	36957	-	LOC110686622	--	K00766 anthranilate phosphoribosyltransferase [EC:2.4.2.18] | (RefSeq) anthranilate phosphoribosyltransferase, chloroplastic-like (A)	anthranilate phosphoribosyltransferase, chloroplastic-like [Chenopodium quinoa]	RecName: Full=Anthranilate phosphoribosyltransferase, chloroplastic; EC=2.4.2.18; Flags: Precursor;	SubName: Full=Uncharacterized protein {ECO:0000313|EMBL:KNA14878.1};	Anthranilate phosphoribosyltransferase	GO:0009507,chloroplast; GO:0009941,chloroplast envelope; GO:0009570,chloroplast stroma; GO:0009536,plastid; GO:0004048,anthranilate phosphoribosyltransferase activity; GO:0000162,tryptophan biosynthetic process	Glycosyl transferase family, a/b domain
gene-LOC110686648	14.55	10.21	18.73	6.13	7.57	8.52	924	635	1048	382	463	522	2.087	1.061	0.001378	0.0186438	up	NW_018743893.1	362023	365867	-	LOC110686648	--	K01087 trehalose 6-phosphate phosphatase [EC:3.1.3.12] | (RefSeq) trehalose-phosphate phosphatase A-like (A)	protein KINESIN LIGHT CHAIN-RELATED 3-like [Chenopodium quinoa]	RecName: Full=Protein KINESIN LIGHT CHAIN-RELATED 2 {ECO:0000303|PubMed:23204523}; AltName: Full=Kinesin light chain-like protein 1 {ECO:0000303|Ref.1}; Short=AtKLC1 {ECO:0000303|Ref.1};	SubName: Full=Uncharacterized protein {ECO:0000313|EMBL:KNA08306.1}; Flags: Fragment;	Kinesin light chain	GO:0005886,plasma membrane; GO:0009860,pollen tube growth; GO:0031347,regulation of defense response	Tetratricopeptide repeat
gene-LOC110686655	1369.37	2032.53	1022.33	675.24	214.17	557.87	51127	74313	33626	24721	7703	20095	3.31	1.727	3.81329e-05	0.000904029	up	NW_018743893.1	454883	460450	-	LOC110686655	--	K13366 polyamine oxidase [EC:1.5.3.14 1.5.3.16 1.5.3.-] | (RefSeq) polyamine oxidase-like (A)	polyamine oxidase-like [Chenopodium quinoa]	RecName: Full=Polyamine oxidase; EC=1.5.3.14; EC=1.5.3.15; Flags: Precursor;	SubName: Full=Polyamine oxidase {ECO:0000313|EMBL:AAM43922.1}; EC=1.4.3.4 {ECO:0000313|EMBL:AAM43922.1};	Amine oxidase	GO:0052898,N1-acetylspermidine:oxygen oxidoreductase (propane-1,3-diamine-forming) activity; GO:0052893,N1-acetylspermine:oxygen oxidoreductase (propane-1,3-diamine-forming) activity; GO:0052897,N8-acetylspermidine:oxygen oxidoreductase (propane-1,3-diamine-forming) activity; GO:0052896,spermidine oxidase (propane-1,3-diamine-forming) activity; GO:0052900,spermine oxidase (propane-1,3-diamine-for…	Flavin containing amine oxidoreductase
gene-LOC110686657	2283.79	2194.98	1244.04	976.79	687.88	840.04	29974	28211	14384	12571	8697	10637	2.438	1.286	0.000154066	0.00303498	up	NW_018743893.1	549792	553755	-	LOC110686657	--	--	uncharacterized protein LOC110686657 [Chenopodium quinoa]	RecName: Full=Trypsin inhibitor 1; AltName: Full=SOTI I; AltName: Full=Trypsin inhibitor I;	SubName: Full=Uncharacterized protein {ECO:0000313|EMBL:KNA13658.1};	--	GO:0004867,serine-type endopeptidase inhibitor activity	Trypsin inhibitors 1,2 and 3
gene-LOC110686658	8.17	7.24	7.42	4.43	3.64	4.03	235	204	188	125	101	112	2	1	0.000605122	0.00955161	up	NW_018743893.1	597051	599945	+	LOC110686658	--	K03188 urease accessory protein | (RefSeq) uncharacterized protein LOC108224146 isoform X1 (A)	putative F-box protein PP2-B12 [Chenopodium quinoa]	RecName: Full=Putative F-box protein PP2-B12; AltName: Full=Protein PHLOEM PROTEIN 2-LIKE B12; Short=AtPP2-B12;	SubName: Full=Uncharacterized protein {ECO:0000313|EMBL:KNA11847.1};	--	GO:0030246,carbohydrate binding	Phloem protein 2
gene-LOC110686663	17.82	16.29	18.32	4.66	4.81	4.98	761	681	689	195	198	205	3.833	1.939	3.75877e-14	4.87137e-12	up	NW_018743893.1	678100	682283	-	LOC110686663	--	K00128 aldehyde dehydrogenase (NAD+) [EC:1.2.1.3] | (RefSeq) aldehyde dehydrogenase family 2 member B4, mitochondrial-like isoform X1 (A)	aldehyde dehydrogenase family 2 member B4, mitochondrial-like isoform X1 [Chenopodium quinoa]	RecName: Full=Aldehyde dehydrogenase family 2 member B4, mitochondrial; Short=ALDH2a; EC=1.2.1.3; Flags: Precursor;	SubName: Full=Uncharacterized protein {ECO:0000313|EMBL:KNA04660.1};	Aldehyde dehydrogenase	GO:0009507,chloroplast; GO:0005759,mitochondrial matrix; GO:0005739,mitochondrion; GO:0004029,aldehyde dehydrogenase (NAD) activity; GO:0005524,ATP binding; GO:0046686,response to cadmium ion	Aldehyde dehydrogenase family
gene-LOC110686684	1.36	3.22	1.17	0.02	0.15	0.07	58	135	44	1	6	3	24.134	4.593	1.09642e-09	7.15498e-08	up	NW_018743893.1	895634	899416	+	LOC110686684	--	K21483 salicylate 1-O-methyltransferase [EC:2.1.1.274] | (RefSeq) salicylate carboxymethyltransferase-like (A)	salicylate carboxymethyltransferase-like [Chenopodium quinoa]	RecName: Full=Salicylate carboxymethyltransferase; EC=2.1.1.274; AltName: Full=S-adenosyl-L-methionine:salicylate acid carboxylmethyltransferase; Short=CbSAMT; AltName: Full=Salicylate O-methyltransferase;	SubName: Full=Uncharacterized protein {ECO:0000313|EMBL:KNA17621.1};	--	GO:0046872,metal ion binding; GO:0008168,methyltransferase activity	SAM dependent carboxyl methyltransferase
gene-LOC110686685	0.12	0.06	0.17	0	0	0	8	4	10	0	0	0	44.077	5.462	0.00183888	0.0233325	up	NW_018743893.1	911941	916603	+	LOC110686685	--	--	--	--	--	--	--	--
gene-LOC110686689	4.49	6.97	9.76	3.29	2.45	5.31	213	324	408	153	112	243	2.082	1.058	0.00172938	0.0221793	up	NW_018743893.1	1017207	1027465	-	LOC110686689	--	K12862 pleiotropic regulator 1 | (RefSeq) uncharacterized protein LOC9311097 (A)	protease Do-like 9 [Chenopodium quinoa]	RecName: Full=Protease Do-like 9; EC=3.4.21.-;	SubName: Full=Uncharacterized protein {ECO:0000313|EMBL:KDP31134.1};	Serine protease	GO:0009507,chloroplast; GO:0005730,nucleolus; GO:0004252,serine-type endopeptidase activity	PDZ domain
gene-LOC110686715	0.04	0.14	0.47	0	0	0	2	7	21	0	0	0	59.383	5.892	0.00142111	0.0191082	up	NW_018743893.1	1316465	1319251	-	LOC110686715	--	K04079 molecular chaperone HtpG | (RefSeq) F-box/kelch-repeat protein At3g06240-like (A)	F-box/kelch-repeat protein At3g23880-like [Chenopodium quinoa]	RecName: Full=F-box protein CPR1; AltName: Full=Protein CONSTITUTIVE EXPRESSER OF PR GENES 1; AltName: Full=Protein CONSTITUTIVE EXPRESSER OF PR GENES 30 {ECO:0000303|PubMed:19682297};	SubName: Full=Uncharacterized protein {ECO:0000313|EMBL:KNA20051.1};	--	GO:0005737,cytoplasm; GO:0005634,nucleus; GO:0004842,ubiquitin-protein transferase activity; GO:0031348,negative regulation of defense response; GO:0042177,negative regulation of protein catabolic process; GO:0009626,plant-type hypersensitive response; GO:0031146,SCF-dependent proteasomal ubiquitin-dependent protein catabolic process	F-box associated domain
gene-LOC110686716	204.5	122.18	169.54	74.76	65.82	46.79	8073	4723	5896	2894	2503	1782	2.763	1.466	0.000224679	0.00420189	up	NW_018743893.1	1335302	1340873	+	LOC110686716	--	K00130 betaine-aldehyde dehydrogenase [EC:1.2.1.8] | (RefSeq) betaine aldehyde dehydrogenase, chloroplastic-like (A)	betaine aldehyde dehydrogenase, chloroplastic-like [Chenopodium quinoa]	RecName: Full=Betaine aldehyde dehydrogenase, chloroplastic; Short=BADH; EC=1.2.1.8; Flags: Precursor;	SubName: Full=Betaine aldehyde dehydrogenase {ECO:0000313|EMBL:ALA65446.1};	Aldehyde dehydrogenase	GO:0009507,chloroplast; GO:0008802,betaine-aldehyde dehydrogenase activity; GO:0019285,glycine betaine biosynthetic process from choline	Aldehyde dehydrogenase family
gene-LOC110686750	1.45	1.38	3.63	0.39	0.2	0.2	15	14	33	4	2	2	8.468	3.082	0.000502326	0.00817714	up	NW_018743893.1	632336	632842	+	LOC110686750	--	K15706 E3 ubiquitin-protein ligase RNF167 [EC:2.3.2.27] | (RefSeq) RING-H2 finger protein ATL74 (A)	RING-H2 finger protein ATL65-like [Chenopodium quinoa]	RecName: Full=RING-H2 finger protein ATL65; EC=2.3.2.27 {ECO:0000305}; AltName: Full=RING-type E3 ubiquitin transferase ATL65 {ECO:0000305};	SubName: Full=Uncharacterized protein {ECO:0000313|EMBL:KNA11845.1};	FOG: Predicted E3 ubiquitin ligase	GO:0016021,integral component of membrane; GO:0046872,metal ion binding; GO:0061630,ubiquitin protein ligase activity; GO:0043161,proteasome-mediated ubiquitin-dependent protein catabolic process	Ring finger domain
gene-LOC110686755	16.18	12.39	13.28	4.21	6.48	9.84	184	138	133	47	71	108	2.238	1.162	0.00201522	0.0250704	up	NW_018743893.1	743793	744350	+	LOC110686755	--	--	uncharacterized protein LOC110686755 [Chenopodium quinoa]	--	SubName: Full=Uncharacterized protein {ECO:0000313|EMBL:KNA17687.1};	--	--	--
gene-LOC110686775	0.21	0.36	0.24	0.07	0.01	0.04	21	35	21	7	1	4	6.955	2.798	0.000236462	0.00438672	up	NW_018743893.1	1493280	1503457	+	LOC110686775	--	--	--	--	--	--	--	--
gene-LOC110686786	10	0	10.6	0.54	0.14	0.27	76	0	71	4	1	2	24.213	4.598	0.000955265	0.0137988	up	NW_018743894.1	2200249	2200962	-	LOC110686786	--	--	--	--	--	--	--	--
gene-LOC110686832	0.75	0.51	0.9	0	0	0	33	22	35	0	0	0	178.786	7.482	3.85982e-08	1.87341e-06	up	NW_018743894.1	1947434	1971625	-	LOC110686832	--	--	uncharacterized protein LOC110686832 isoform X1 [Chenopodium quinoa]	--	SubName: Full=Uncharacterized protein {ECO:0000313|EMBL:KNA22348.1};	--	--	Plant transposase (Ptta/En/Spm family)
gene-LOC110686844	0.82	1.33	0.97	0.15	0.18	0.13	109	172	113	19	23	16	7.094	2.827	3.15555e-12	3.05915e-10	up	NW_018743894.1	3249346	3265015	-	LOC110686844	--	--	uncharacterized protein LOC110686844 isoform X1 [Chenopodium quinoa]	--	SubName: Full=Uncharacterized protein {ECO:0000313|EMBL:KNA04930.1}; Flags: Fragment;	--	--	HMG (high mobility group) box
gene-LOC110686917	1.26	2.59	2.66	0	0	0	54	109	101	0	0	0	510.16	8.995	1.66279e-12	1.69675e-10	up	NW_018743906.1	570485	575604	-	LOC110686917	--	--	--	--	--	--	--	--
gene-LOC110686922	0.29	0.56	0.6	0	0	0	14	27	26	0	0	0	129.71	7.019	5.54779e-07	2.15925e-05	up	NW_018743906.1	692713	702505	-	LOC110686922	--	--	uncharacterized protein LOC110686922 [Chenopodium quinoa]	--	SubName: Full=Uncharacterized protein {ECO:0000313|EMBL:KNA05185.1}; Flags: Fragment;	--	--	Plant transposase (Ptta/En/Spm family)
gene-LOC110686930	0.13	0.48	0.58	0	0	0	3	11	12	0	0	0	50.095	5.647	0.00118942	0.0165471	up	NW_018743906.1	920615	921847	-	LOC110686930	--	--	uncharacterized protein LOC110686930 [Chenopodium quinoa]	--	--	--	--	--
gene-LOC110686951	3.07	3.38	5.38	0.49	0.93	0.4	103	111	159	16	30	13	6.535	2.708	2.63346e-07	1.08803e-05	up	NW_018743906.1	1566565	1568960	-	LOC110686951	--	--	uncharacterized protein LOC110686951 [Chenopodium quinoa]	--	SubName: Full=Uncharacterized protein {ECO:0000313|EMBL:KNA17450.1};	--	--	Protein of unknown function (DUF1685)
gene-LOC110686952	29.63	37.92	41.07	4.63	2.36	5.95	1239	1553	1513	190	95	240	9.179	3.198	5.1787e-30	4.66538e-27	up	NW_018743906.1	1650961	1653012	+	LOC110686952	--	K17193 anthocyanidin 3-O-glucoside 2'''-O-xylosyltransferase [EC:2.4.2.51] | (RefSeq) UDP-glycosyltransferase 79B6-like (A)	UDP-glycosyltransferase 79B6-like [Chenopodium quinoa]	RecName: Full=UDP-glycosyltransferase 79B6; EC=2.4.1.-;	SubName: Full=Uncharacterized protein {ECO:0000313|EMBL:KNA22368.1};	UDP-glucuronosyl and UDP-glucosyl transferase	GO:0043231,intracellular membrane-bounded organelle; GO:0080043,quercetin 3-O-glucosyltransferase activity; GO:0080044,quercetin 7-O-glucosyltransferase activity; GO:0035251,UDP-glucosyltransferase activity; GO:0008152,metabolic process	UDP-glucoronosyl and UDP-glucosyl transferase
gene-LOC110687018	6.62	0.49	1.85	0.15	0.15	0.1	138	10	34	3	3	2	25.385	4.666	8.7962e-06	0.000249536	up	NW_018743909.1	38334	39356	-	LOC110687018	--	--	miraculin-like [Chenopodium quinoa]	RecName: Full=Miraculin; Short=MIR; Flags: Precursor;	SubName: Full=Uncharacterized protein {ECO:0000313|EMBL:KNA03096.1};	--	GO:0004866,endopeptidase inhibitor activity	Trypsin and protease inhibitor
gene-LOC110687121	1.32	1.96	1.2	0.22	0.34	0.43	157	227	125	25	39	49	4.833	2.273	6.90401e-10	4.64493e-08	up	NW_018743919.1	463128	471549	+	LOC110687121	--	K20606 mitogen-activated protein kinase kinase kinase ANP1 [EC:2.7.11.25] | (RefSeq) receptor-like serine/threonine-protein kinase SD1-7 isoform X1 (A)	uncharacterized protein LOC110687121 [Chenopodium quinoa]	RecName: Full=G-type lectin S-receptor-like serine/threonine-protein kinase At1g11330; EC=2.7.11.1; Flags: Precursor;	SubName: Full=uncharacterized protein LOC107858220 {ECO:0000313|RefSeq:XP_016558400.1};	--	GO:0016021,integral component of membrane; GO:0005886,plasma membrane; GO:0005524,ATP binding; GO:0005516,calmodulin binding; GO:0030246,carbohydrate binding; GO:0004674,protein serine/threonine kinase activity; GO:0006468,protein phosphorylation; GO:0048544,recognition of pollen	Protein kinase domain
gene-LOC110687201	6.58	9.09	10.59	2.29	3.21	3.26	343	464	486	117	161	164	3.123	1.643	3.59156e-08	1.76172e-06	up	NW_018743919.1	18914	21470	+	LOC110687201	--	K08332 vacuolar protein 8 | (RefSeq) U-box domain-containing protein 4 (A)	uncharacterized protein LOC110687201 [Chenopodium quinoa]	RecName: Full=U-box domain-containing protein 4; EC=2.3.2.27; AltName: Full=Plant U-box protein 4; AltName: Full=RING-type E3 ubiquitin transferase PUB4 {ECO:0000305};	SubName: Full=Uncharacterized protein {ECO:0000313|EMBL:KNA09553.1};	FOG: Armadillo/beta-catenin-like repeats	GO:0005634,nucleus; GO:0004842,ubiquitin-protein transferase activity	Armadillo/beta-catenin-like repeat
gene-LOC110687210	0.54	2.72	0.62	0.1	0.15	0.05	11	54	11	2	3	1	12.453	3.638	0.000476755	0.00783685	up	NW_018743919.1	269320	272018	+	LOC110687210	--	K06910 phosphatidylethanolamine-binding protein | (RefSeq) protein MOTHER of FT and TFL1-like (A)	protein MOTHER of FT and TFL1-like [Chenopodium quinoa]	RecName: Full=Protein MOTHER of FT and TFL1;	SubName: Full=protein MOTHER of FT and TFL1-like {ECO:0000313|RefSeq:XP_010268882.1};	Phosphatidylethanolamine binding protein	GO:0005737,cytoplasm; GO:0005634,nucleus; GO:0009738,abscisic acid-activated signaling pathway; GO:0010030,positive regulation of seed germination; GO:0009737,response to abscisic acid	Phosphatidylethanolamine-binding protein
gene-LOC110687236	2.25	2.68	1.57	0.85	0.82	1.78	148	173	91	55	52	113	2.084	1.059	0.00421276	0.0440052	up	NW_018743919.1	663122	672193	+	LOC110687236	--	K20606 mitogen-activated protein kinase kinase kinase ANP1 [EC:2.7.11.25] | (RefSeq) receptor-like serine/threonine-protein kinase SD1-7 isoform X1 (A)	receptor-like serine/threonine-protein kinase SD1-8 [Chenopodium quinoa]	RecName: Full=Receptor-like serine/threonine-protein kinase SD1-8; EC=2.7.11.1; AltName: Full=Arabidopsis thaliana receptor kinase 3; AltName: Full=S-domain-1 (SD1) receptor kinase 8; Short=SD1-8; Flags: Precursor;	SubName: Full=Brassica self-incompatibility locus family protein {ECO:0000313|EMBL:EEE85477.1};	--	GO:0016021,integral component of membrane; GO:0005886,plasma membrane; GO:0009506,plasmodesma; GO:0005773,vacuole; GO:0005524,ATP binding; GO:0030246,carbohydrate binding; GO:0004674,protein serine/threonine kinase activity; GO:0004675,transmembrane receptor protein serine/threonine kinase activity; GO:0031625,ubiquitin protein ligase binding; GO:0006468,protein phosphorylation; GO:0048544,recogn…	Protein tyrosine kinase
gene-LOC110687239	9.69	6.13	10.67	2.97	2.58	3.78	460	285	446	138	118	173	3.089	1.627	8.21683e-07	3.06253e-05	up	NW_018743919.1	691320	693648	+	LOC110687239	--	K10260 F-box and WD-40 domain protein 7 | (RefSeq) WD40/YVTN repeat-like-containing domain (A)	U-box domain-containing protein 8-like [Chenopodium quinoa]	RecName: Full=U-box domain-containing protein 8; EC=2.3.2.27; AltName: Full=Plant U-box protein 8; AltName: Full=RING-type E3 ubiquitin transferase PUB8 {ECO:0000305};	RecName: Full=RING-type E3 ubiquitin transferase {ECO:0000256|SAAS:SAAS00702733}; EC=2.3.2.27 {ECO:0000256|SAAS:SAAS00702733};	FOG: Armadillo/beta-catenin-like repeats	GO:0005737,cytoplasm; GO:0005634,nucleus; GO:0004842,ubiquitin-protein transferase activity; GO:0016567,protein ubiquitination	U-box domain
gene-LOC110687247	16.89	11.32	19.77	0.99	0.85	0.3	349	229	360	20	17	6	22.901	4.517	2.86028e-17	5.72895e-15	up	NW_018743919.1	840179	842060	+	LOC110687247	--	--	23 kDa jasmonate-induced protein-like [Chenopodium quinoa]	RecName: Full=23 kDa jasmonate-induced protein;	SubName: Full=Uncharacterized protein {ECO:0000313|EMBL:KMS94989.1};	--	--	--
gene-LOC110687266	2.23	7.76	3.99	1.15	0.23	0.21	99	337	156	50	10	9	8.719	3.124	1.59776e-05	0.000422139	up	NW_018743919.1	1152959	1157595	-	LOC110687266	--	K14173 alpha-farnesene synthase [EC:4.2.3.46] | (RefSeq) alpha-farnesene synthase-like (A)	alpha-farnesene synthase-like [Chenopodium quinoa]	RecName: Full=Alpha-farnesene synthase; EC=4.2.3.46; AltName: Full=(E,E)-alpha-farnesene synthase; AltName: Full=Terpene synthase 7; Short=RcSeTPS7;	SubName: Full=Uncharacterized protein {ECO:0000313|EMBL:KMS96558.1};	--	GO:0000287,magnesium ion binding; GO:0010334,sesquiterpene synthase activity; GO:0051762,sesquiterpene biosynthetic process	Terpene synthase family, metal binding domain
gene-LOC110687286	2.85	3.88	2.42	1.03	0.5	1.16	135	180	101	48	23	53	3.681	1.88	3.34162e-07	1.35782e-05	up	NW_018743919.1	1376228	1379292	+	LOC110687286	--	--	--	--	--	--	--	--
gene-LOC110687311	1.22	1.76	0.81	0	0	0	72	102	42	0	0	0	414.733	8.696	1.82442e-11	1.58185e-09	up	NW_018743919.1	1643503	1647222	-	LOC110687311	--	--	--	--	--	--	--	--
gene-LOC110687343	3.14	3.35	2.78	1.81	0.94	1.89	170	178	133	96	49	99	2.173	1.12	0.000385957	0.00658463	up	NW_018743919.1	2330124	2335898	-	LOC110687343	--	K14638 solute carrier family 15 (peptide/histidine transporter), member 3/4 | (RefSeq) protein NRT1/ PTR FAMILY 1.2-like (A)	protein NRT1/ PTR FAMILY 1.2-like [Chenopodium quinoa]	RecName: Full=Protein NRT1/ PTR FAMILY 1.2; Short=AtNPF1.2; AltName: Full=Nitrate transporter 1.11;	SubName: Full=Uncharacterized protein {ECO:0000313|EMBL:KNA07630.1};	H+/oligopeptide symporter	GO:0016021,integral component of membrane; GO:0005886,plasma membrane; GO:0080054,low-affinity nitrate transmembrane transporter activity; GO:0015706,nitrate transport	POT family
gene-LOC110687365	3.69	8.71	5.25	1.72	2.2	1.97	103	238	129	47	59	53	3.062	1.615	5.61795e-05	0.0012645	up	NW_018743919.1	2616187	2617555	+	LOC110687365	--	K20855 beta-1,3-galactosyltransferase 1/2/3/4/5/7/8 [EC:2.4.1.-] | (RefSeq) probable beta-1,3-galactosyltransferase 2 (A)	uncharacterized protein LOC110687365 [Chenopodium quinoa]	--	SubName: Full=Uncharacterized protein {ECO:0000313|EMBL:KNA24128.1};	--	--	Senescence regulator
gene-LOC110687372	18.21	19.81	14.85	9.25	6.17	10.08	1825	1944	1311	909	596	975	2.237	1.162	9.98334e-07	3.65094e-05	up	NW_018743919.1	2737288	2750970	+	LOC110687372	--	K00703 starch synthase [EC:2.4.1.21] | (RefSeq) starch synthase 3, chloroplastic/amyloplastic-like isoform X1 (A)	starch synthase 3, chloroplastic/amyloplastic-like isoform X1 [Chenopodium quinoa]	RecName: Full=Soluble starch synthase 3, chloroplastic/amyloplastic; EC=2.4.1.21; AltName: Full=Soluble starch synthase III; Short=SS III; Flags: Precursor;	SubName: Full=Uncharacterized protein {ECO:0000313|EMBL:KNA09182.1};	--	GO:0009501,amyloplast; GO:0009507,chloroplast; GO:0033201,alpha-1,4-glucan synthase activity; GO:0004373,glycogen (starch) synthase activity; GO:2001070,starch binding; GO:0009011,starch synthase activity; GO:0019252,starch biosynthetic process	Starch/carbohydrate-binding module (family 53)
gene-LOC110687390	3.97	4.25	4.9	1.6	2.3	2.22	104	109	113	41	58	56	2.255	1.173	0.000654369	0.0101768	up	NW_018743919.1	2994100	2998141	-	LOC110687390	--	K13347 peroxisomal membrane protein 2 | (RefSeq) peroxisomal membrane protein PMP22-like (A)	peroxisomal membrane protein PMP22-like [Chenopodium quinoa]	RecName: Full=Peroxisomal membrane protein PMP22; AltName: Full=22 kDa peroxisomal membrane protein;	SubName: Full=Uncharacterized protein {ECO:0000313|EMBL:KNA25253.1};	Peroxisomal membrane protein MPV17 and related proteins	GO:0005779,integral component of peroxisomal membrane	Mpv17 / PMP22 family
gene-LOC110687420	13.05	11.11	9.94	5	4.03	9.16	756	630	507	284	225	512	2.098	1.069	0.000373134	0.00639242	up	NW_018743919.1	3461507	3470612	-	LOC110687420	--	K10143 E3 ubiquitin-protein ligase RFWD2 [EC:2.3.2.27] | (RefSeq) E3 ubiquitin-protein ligase COP1-like (A)	E3 ubiquitin-protein ligase COP1-like [Chenopodium quinoa]	RecName: Full=E3 ubiquitin-protein ligase COP1 {ECO:0000303|PubMed:1423630}; EC=2.3.2.27 {ECO:0000269|PubMed:14597662}; AltName: Full=Constitutive photomorphogenesis protein 1 {ECO:0000303|PubMed:1423630}; AltName: Full=RING-type E3 ubiquitin transferase COP1 {ECO:0000303|PubMed:1423630};	SubName: Full=Uncharacterized protein {ECO:0000313|EMBL:KNA04927.1};	--	GO:0080008,Cul4-RING E3 ubiquitin ligase complex; GO:0005737,cytoplasm; GO:0016604,nuclear body; GO:0000152,nuclear ubiquitin ligase complex; GO:0005634,nucleus; GO:0042802,identical protein binding; GO:0046872,metal ion binding; GO:0061630,ubiquitin protein ligase activity; GO:0004842,ubiquitin-protein transferase activity; GO:0046283,anthocyanin-containing compound metabolic process; GO:0006281…	WD domain, G-beta repeat
gene-LOC110687470	1.66	2.48	3.52	0.74	0.36	0.69	62	91	116	27	13	25	4.549	2.186	9.32908e-07	3.42524e-05	up	NW_018743919.1	4078951	4080785	-	LOC110687470	--	K07198 5'-AMP-activated protein kinase, catalytic alpha subunit [EC:2.7.11.11] | (RefSeq) CBL-interacting protein kinase 5-like (A)	CBL-interacting serine/threonine-protein kinase 12-like [Chenopodium quinoa]	RecName: Full=CBL-interacting serine/threonine-protein kinase 12; EC=2.7.11.1; AltName: Full=SNF1-related kinase 3.9; AltName: Full=SOS2-like protein kinase PKS8;	RecName: Full=Non-specific serine/threonine protein kinase {ECO:0000256|SAAS:SAAS00351747}; EC=2.7.11.1 {ECO:0000256|SAAS:SAAS00351747};	Serine/threonine protein kinase	GO:0005622,intracellular; GO:0005524,ATP binding; GO:0004674,protein serine/threonine kinase activity; GO:0035556,intracellular signal transduction; GO:0018105,peptidyl-serine phosphorylation; GO:0018107,peptidyl-threonine phosphorylation	Protein kinase domain
gene-LOC110687475	1.26	2.28	1.29	0.6	0.31	0.87	30	53	27	14	7	20	2.951	1.561	0.00360094	0.0393271	up	NW_018743919.1	4140581	4148645	-	LOC110687475	--	--	accelerated cell death 11-like [Chenopodium quinoa]	RecName: Full=Accelerated cell death 11 {ECO:0000303|PubMed:11850411}; AltName: Full=Ceramide-1-phosphate transfer protein ACD11 {ECO:0000305}; AltName: Full=Glycolipid transfer protein domain-containing protein ACD11 {ECO:0000305};	SubName: Full=Uncharacterized protein {ECO:0000313|EMBL:KNA10422.1};	Uncharacterized conserved protein	GO:0005737,cytoplasm; GO:0120013,intermembrane lipid transfer activity; GO:0008289,lipid binding; GO:0010175,sphingosine transmembrane transporter activity; GO:0008219,cell death; GO:0009816,defense response to bacterium, incompatible interaction; GO:0009751,response to salicylic acid	Glycolipid transfer protein (GLTP)
gene-LOC110687483	1.63	2.43	1.06	0.07	0.12	0.1	68	99	39	3	5	4	18.121	4.18	8.89933e-11	7.05377e-09	up	NW_018743919.1	4211313	4214562	+	LOC110687483	--	K05389 potassium channel subfamily K, other eukaryote | (RefSeq) two-pore potassium channel 1-like (A)	two-pore potassium channel 1-like [Chenopodium quinoa]	RecName: Full=Two-pore potassium channel 1; Short=AtTPK1; AltName: Full=Calcium-activated outward-rectifying potassium channel 1; Short=AtKCO1;	SubName: Full=Uncharacterized protein {ECO:0000313|EMBL:KNA14812.1};	Tandem pore domain K+ channel	GO:0005887,integral component of plasma membrane; GO:0009705,plant-type vacuole membrane; GO:0005774,vacuolar membrane; GO:0005216,ion channel activity; GO:0046872,metal ion binding; GO:0022841,potassium ion leak channel activity; GO:0030007,cellular potassium ion homeostasis; GO:0051260,protein homooligomerization; GO:0010029,regulation of seed germination; GO:0010119,regulation of stomatal move…	Ion channel
gene-LOC110687484	0.61	0.26	0.24	0	0	0.04	29	12	10	0	0	2	30.068	4.91	0.00048169	0.00790039	up	NW_018743919.1	4215964	4221059	+	LOC110687484	--	--	microtubule-associated protein 70-5-like [Chenopodium quinoa]	RecName: Full=Microtubule-associated protein 70-5; Short=AtMAP70-5; AltName: Full=70 kDa microtubule-associated protein 5;	SubName: Full=Uncharacterized protein {ECO:0000313|EMBL:KNA14811.1};	--	GO:0005737,cytoplasm; GO:0005874,microtubule; GO:0008017,microtubule binding; GO:0071555,cell wall organization; GO:0007010,cytoskeleton organization; GO:0009832,plant-type cell wall biogenesis; GO:0010051,xylem and phloem pattern formation	Microtubule-associated protein 70
gene-LOC110687530	33.81	39.1	29.74	18.43	16.22	18.09	649	735	503	347	300	335	2.051	1.036	2.26573e-05	0.000577949	up	NW_018743919.1	3375201	3376142	-	LOC110687530	--	--	uncharacterized protein LOC110687530 [Chenopodium quinoa]	--	SubName: Full=Uncharacterized protein {ECO:0000313|EMBL:KNA25805.1};	--	--	--
gene-LOC110687677	1.09	2.49	0.98	0.43	0.3	0.83	34	76	27	13	9	25	3.193	1.675	0.00344078	0.0381076	up	NW_018743920.1	1225909	1227438	-	LOC110687677	--	K15405 midchain alkane hydroxylase | (RefSeq) alkane hydroxylase MAH1 (A)	alkane hydroxylase MAH1-like [Chenopodium quinoa]	RecName: Full=Alkane hydroxylase MAH1 {ECO:0000303|PubMed:17905869}; EC=1.14.-.- {ECO:0000305|PubMed:17905869}; AltName: Full=Cytochrome P450 96A15 {ECO:0000305}; AltName: Full=Protein MID-CHAIN ALKANE HYDROXYLASE 1 {ECO:0000303|PubMed:17905869};	SubName: Full=Uncharacterized protein {ECO:0000313|EMBL:KNA09819.1};	Cytochrome P450 CYP4/CYP19/CYP26 subfamilies	GO:0005783,endoplasmic reticulum; GO:0005789,endoplasmic reticulum membrane; GO:0016021,integral component of membrane; GO:0020037,heme binding; GO:0005506,iron ion binding; GO:0080133,midchain alkane hydroxylase activity; GO:0010025,wax biosynthetic process	Cytochrome P450
gene-LOC110687740	24.01	22.25	34.76	12.85	7.59	21.71	345	313	440	181	105	301	2.149	1.104	0.00161453	0.0210648	up	NW_018743920.1	272745	275766	-	LOC110687740	--	K12160 small ubiquitin-related modifier | (RefSeq) small ubiquitin-related modifier 1-like (A)	small ubiquitin-related modifier 1-like [Chenopodium quinoa]	RecName: Full=Small ubiquitin-related modifier 2; Short=AtSUMO2;	RecName: Full=Small ubiquitin-related modifier {ECO:0000256|RuleBase:RU361190}; Short=SUMO {ECO:0000256|RuleBase:RU361190};	Ubiquitin-like proteins	GO:0005737,cytoplasm; GO:0005634,nucleus; GO:0016925,protein sumoylation	Ubiquitin-2 like Rad60 SUMO-like
gene-LOC110687784	1.05	1.02	0.99	0.03	0.11	0.08	41	39	34	1	4	3	15.394	3.944	5.66006e-08	2.68026e-06	up	NW_018743920.1	699954	702622	-	LOC110687784	--	--	uncharacterized protein LOC110687784 [Chenopodium quinoa]	--	SubName: Full=Uncharacterized protein {ECO:0000313|EMBL:KMS99394.1};	--	--	Plant mobile domain
gene-LOC110687819	0.47	0.53	1.24	0	0	0	9	10	21	0	0	0	79.187	6.307	5.06419e-05	0.00115392	up	NW_018743920.1	1357081	1360566	+	LOC110687819	--	--	--	--	--	--	--	--
gene-LOC110687821	13.7	9.88	16.14	2.93	2.82	3.75	500	353	519	105	99	132	4.506	2.172	2.26068e-12	2.25677e-10	up	NW_018743920.1	1418808	1421670	-	LOC110687821	--	--	cytochrome b561 and DOMON domain-containing protein At4g12980-like [Chenopodium quinoa]	RecName: Full=Cytochrome b561 and DOMON domain-containing protein At4g12980; AltName: Full=Protein b561A.tha15; Flags: Precursor;	SubName: Full=Uncharacterized protein {ECO:0000313|EMBL:KMS95719.1};	Predicted membrane protein, contains DoH and Cytochrome b-561/ferric reductase transmembrane domains	GO:0016021,integral component of membrane; GO:0046872,metal ion binding; GO:0055114,oxidation-reduction process	Protein of unknown function (DUF568)
gene-LOC110687841	13.75	3.91	6.75	0	0	0	481	134	208	0	0	0	1665.41	10.702	9.08945e-16	1.43473e-13	up	NW_018743920.1	1681755	1683895	+	LOC110687841	--	K07418 cytochrome P450 family 2 subfamily J [EC:1.14.14.1 1.14.14.73 1.14.14.74 1.14.14.75] | (RefSeq) cytochrome P450 71A26-like (A)	cytochrome P450 71A26-like [Chenopodium quinoa]	RecName: Full=Cytochrome P450 71A6; EC=1.14.-.-; Flags: Fragment;	SubName: Full=Uncharacterized protein {ECO:0000313|EMBL:OAY30793.1};	Cytochrome P450 CYP2 subfamily	GO:0016021,integral component of membrane; GO:0020037,heme binding; GO:0005506,iron ion binding; GO:0004497,monooxygenase activity; GO:0016705,oxidoreductase activity, acting on paired donors, with incorporation or reduction of molecular oxygen	Cytochrome P450
gene-LOC110687876	9.48	11.33	12.8	3.24	2.12	6.42	487	570	579	163	105	318	3.195	1.676	2.29325e-07	9.60355e-06	up	NW_018743920.1	2343320	2350140	+	LOC110687876	--	K01376 UFM1-specific protease 2 [EC:3.4.22.-] | (RefSeq) probable Ufm1-specific protease (A)	probable Ufm1-specific protease [Chenopodium quinoa]	RecName: Full=Probable Ufm1-specific protease; Short=UfSP; EC=3.4.22.-;	SubName: Full=Uncharacterized protein {ECO:0000313|EMBL:KNA05939.1};	Uncharacterized conserved protein	GO:0071567,UFM1 hydrolase activity	Peptidase family C78
gene-LOC110687900	0.24	0.39	0.58	0	0.03	0.08	20	31	42	0	2	6	13.27	3.73	2.54812e-05	0.000638084	up	NW_018743920.1	2646125	2655773	+	LOC110687900	--	K15503 serine/threonine-protein phosphatase 6 regulatory ankyrin repeat subunit B | (RefSeq) uncharacterized LOC104891722 (A)	ankyrin-1-like [Chenopodium quinoa]	RecName: Full=Ankyrin repeat-containing protein NPR4 {ECO:0000305}; Short=OsNPR4 {ECO:0000303|PubMed:17309686};	SubName: Full=Uncharacterized protein {ECO:0000313|EMBL:KMS95414.1};	FOG: Ankyrin repeat	GO:0016021,integral component of membrane; GO:0005886,plasma membrane	Ankyrin repeats (3 copies)
gene-LOC110687932	17.63	17.79	10.41	6.06	1.9	4.51	1009	997	525	340	105	249	4.012	2.004	4.90726e-06	0.000149179	up	NW_018743920.1	3022872	3033092	+	LOC110687932	--	K15813 beta-amyrin synthase [EC:5.4.99.39] | (RefSeq) beta-amyrin synthase-like (A)	beta-amyrin synthase-like [Chenopodium quinoa]	RecName: Full=Beta-amyrin synthase; EC=5.4.99.39;	RecName: Full=Terpene cyclase/mutase family member {ECO:0000256|RuleBase:RU362003}; EC=5.4.99.- {ECO:0000256|RuleBase:RU362003};	Oxidosqualene-lanosterol cyclase and related proteins	GO:0042300,beta-amyrin synthase activity; GO:0019745,pentacyclic triterpenoid biosynthetic process	Squalene-hopene cyclase C-terminal domain
gene-LOC110687982	1.77	2.31	5.27	0	0	0.02	87	111	228	0	0	1	432.557	8.757	1.59724e-11	1.3947e-09	up	NW_018743920.1	3618623	3621212	+	LOC110687982	--	--	--	--	--	--	--	--
gene-LOC110688005	1.92	3.27	1.71	1	0.98	1.5	102	170	80	52	50	77	2.116	1.081	0.00224772	0.0272546	up	NW_018743920.1	3887598	3891631	-	LOC110688005	--	K05917 sterol 14alpha-demethylase [EC:1.14.14.154 1.14.15.36] | (RefSeq) sterol 14-demethylase-like (A)	sterol 14-demethylase-like [Chenopodium quinoa]	RecName: Full=Sterol 14-demethylase; EC=1.14.13.70; AltName: Full=Cytochrome P450 51A2; AltName: Full=Cytochrome P450 51G1; Short=AtCYP51; AltName: Full=Obtusifoliol 14-demethylase; AltName: Full=Protein EMBRYO DEFECTIVE 1738;	SubName: Full=Uncharacterized protein {ECO:0000313|EMBL:KNA24085.1};	Cytochrome P450	GO:0005783,endoplasmic reticulum; GO:0005794,Golgi apparatus; GO:0016021,integral component of membrane; GO:0005886,plasma membrane; GO:0020037,heme binding; GO:0005506,iron ion binding; GO:0008168,methyltransferase activity; GO:0008398,sterol 14-demethylase activity; GO:0016126,sterol biosynthetic process	Cytochrome P450
gene-LOC110688022	9.63	6.1	5.05	1.93	2.63	1.69	448	278	207	88	118	76	3.474	1.797	8.31208e-05	0.00178705	up	NW_018743920.1	4070155	4073620	+	LOC110688022	--	K01051 pectinesterase [EC:3.1.1.11] | (RefSeq) uncharacterized protein LOC110634634 (A)	pectinesterase 3-like [Chenopodium quinoa]	RecName: Full=Pectinesterase 3; Short=PE 3; EC=3.1.1.11; AltName: Full=Pectin methylesterase 3; Flags: Precursor;	RecName: Full=Pectinesterase {ECO:0000256|RuleBase:RU000589}; EC=3.1.1.11 {ECO:0000256|RuleBase:RU000589};	--	GO:0005618,cell wall; GO:0005576,extracellular region; GO:0045330,aspartyl esterase activity; GO:0004857,enzyme inhibitor activity; GO:0030599,pectinesterase activity; GO:0042545,cell wall modification; GO:0045490,pectin catabolic process	Pectinesterase
gene-LOC110688036	53.45	30.72	51.39	12.93	11.89	15.26	915	515	775	217	196	252	3.665	1.874	2.57261e-08	1.29635e-06	up	NW_018743920.1	4265217	4266056	-	LOC110688036	--	K13448 calcium-binding protein CML | (RefSeq) probable calcium-binding protein CML44 (A)	uncharacterized protein LOC110688036 [Chenopodium quinoa]	--	SubName: Full=Uncharacterized protein {ECO:0000313|EMBL:KNA22656.1};	--	GO:0005509,calcium ion binding	EF-hand domain pair
gene-LOC110688061	2.95	3.82	3.72	1.29	1.45	2.52	177	225	197	76	84	146	2.16	1.111	5.03079e-05	0.00114773	up	NW_018743920.1	4626378	4629326	+	LOC110688061	--	K07195 exocyst complex component 7 | (RefSeq) exocyst complex component EXO70A1-like (A)	exocyst complex component EXO70A1-like [Chenopodium quinoa]	RecName: Full=Exocyst complex component EXO70A1; Short=AtExo70a1; AltName: Full=Exocyst subunit Exo70 family protein A1;	SubName: Full=Uncharacterized protein {ECO:0000313|EMBL:KNA20375.1};	Exocyst component protein and related proteins	GO:0005618,cell wall; GO:0005856,cytoskeleton; GO:0005829,cytosol; GO:0000145,exocyst; GO:0005576,extracellular region; GO:0009524,phragmoplast; GO:0005886,plasma membrane; GO:0006887,exocytosis	Exo70 exocyst complex subunit
gene-LOC110688066	5.2	2.13	8.48	1.91	1.04	2.22	281	113	404	101	54	116	3.385	1.759	0.000824795	0.0122594	up	NW_018742309.1	2570120	2575314	+	LOC110688066	--	K17604 zinc finger SWIM domain-containing protein 3 | (RefSeq) protein FAR1-RELATED SEQUENCE 5-like (A)	protein FAR1-RELATED SEQUENCE 11-like isoform X1 [Chenopodium quinoa]	RecName: Full=Protein FAR1-RELATED SEQUENCE 11;	SubName: Full=Uncharacterized protein {ECO:0000313|EMBL:KNA21195.1};	--	GO:0005634,nucleus; GO:0008270,zinc ion binding; GO:0006355,regulation of transcription, DNA-templated	FAR1 DNA-binding domain
gene-LOC110688071	37.16	63.54	2.55	0.04	0	0.02	2017	3377	122	2	0	1	1958.72	10.936	2.25486e-12	2.25677e-10	up	NW_018743920.1	4802875	4808051	-	LOC110688071	--	K15333 tRNA guanosine-2'-O-methyltransferase [EC:2.1.1.34] | (RefSeq) uncharacterized protein LOC104224633 (A)	subtilisin-like protease SBT1.4 [Chenopodium quinoa]	RecName: Full=Subtilisin-like protease SBT1.4 {ECO:0000303|PubMed:16193095}; EC=3.4.21.- {ECO:0000255|PROSITE-ProRule:PRU10082}; AltName: Full=Subtilase subfamily 1 member 4 {ECO:0000303|PubMed:16193095}; Short=AtSBT1.4 {ECO:0000303|PubMed:16193095}; Flags: Precursor;	SubName: Full=Uncharacterized protein {ECO:0000313|EMBL:KNA20367.1};	--	GO:0048046,apoplast; GO:0009505,plant-type cell wall; GO:0005774,vacuolar membrane; GO:0005773,vacuole; GO:0004252,serine-type endopeptidase activity; GO:0010150,leaf senescence; GO:0010223,secondary shoot formation	Subtilase family
gene-LOC110688093	2.61	3.62	3.28	0	0	0	142	193	157	0	0	0	955.316	9.9	5.52227e-16	9.18787e-14	up	NW_018743920.1	5220137	5227593	+	LOC110688093	--	K00423 L-ascorbate oxidase [EC:1.10.3.3] | (RefSeq) L-ascorbate oxidase (A)	F-box/FBD/LRR-repeat protein At5g53840-like [Chenopodium quinoa]	RecName: Full=Putative F-box/LRR-repeat protein At5g54820;	SubName: Full=Uncharacterized protein {ECO:0000313|EMBL:KMS95077.1};	--	--	F-box domain
gene-LOC110688094	2.11	2.71	3.25	0	0	0	92	116	125	0	0	0	650.638	9.346	5.00696e-14	6.35522e-12	up	NW_018743920.1	5243468	5247691	+	LOC110688094	--	--	uncharacterized protein LOC110688094 [Chenopodium quinoa]	--	--	--	--	--
gene-LOC110688095	0.22	0.26	0.43	0	0	0	17	20	30	0	0	0	131.784	7.042	5.32012e-07	2.07941e-05	up	NW_018743920.1	5274873	5278715	-	LOC110688095	--	--	--	--	--	--	--	--
gene-LOC110688096	5.52	6.14	6.04	0	0	0	215	234	207	0	0	0	1281.46	10.324	2.01723e-17	4.28209e-15	up	NW_018743920.1	5269106	5274644	+	LOC110688096	--	K00423 L-ascorbate oxidase [EC:1.10.3.3] | (RefSeq) L-ascorbate oxidase (A)	putative F-box/LRR-repeat protein At5g54820 [Chenopodium quinoa]	RecName: Full=Putative F-box/LRR-repeat protein At5g54820;	SubName: Full=Uncharacterized protein {ECO:0000313|EMBL:KMS95075.1};	--	--	F-box domain
gene-LOC110688233	6.18	6.71	11.19	3.19	1.71	2.76	79	84	126	40	21	34	3.346	1.743	3.31066e-05	0.000797148	up	NW_018743920.1	6735929	6738061	+	LOC110688233	--	K03007 DNA-directed RNA polymerases I, II, and III subunit RPABC5 | (RefSeq) DNA-directed RNA polymerases I, II, and III subunit RPABC5 (A)	RNA polymerases N / 8 kDa subunit [Theobroma cacao]	RecName: Full=DNA-directed RNA polymerase subunit 10-like protein {ECO:0000303|PubMed:19110459}; AltName: Full=ABC10 {ECO:0000303|PubMed:19110459}; AltName: Full=DNA-directed RNA polymerase III subunit L {ECO:0000303|PubMed:19110459}; AltName: Full=DNA-directed RNA polymerases I, II, and III subunit RPABC5 {ECO:0000303|PubMed:19110459}; Short=RNA polymerases I, II, and III subunit ABC5 {ECO:00003…	SubName: Full=RNA polymerases N / 8 kDa subunit {ECO:0000313|EMBL:EOY00528.1};	DNA-directed RNA polymerase, subunit RPB10	GO:0005736,RNA polymerase I complex; GO:0005665,RNA polymerase II, core complex; GO:0005666,RNA polymerase III complex; GO:0003677,DNA binding; GO:0003899,DNA-directed 5'-3' RNA polymerase activity; GO:0008270,zinc ion binding; GO:0006360,transcription by RNA polymerase I; GO:0006366,transcription by RNA polymerase II; GO:0006383,transcription by RNA polymerase III	RNA polymerases N / 8 kDa subunit
gene-LOC110688235	49.97	33.44	40.37	12.41	9.6	4.78	1724	1130	1227	420	319	159	4.73	2.242	2.36858e-06	7.80427e-05	up	NW_018743920.1	6769681	6771373	-	LOC110688235	--	K20716 mitogen-activated protein kinase kinase kinase 17/18 | (RefSeq) mitogen-activated protein kinase kinase kinase NPK1-like (A)	mitogen-activated protein kinase kinase kinase 18-like [Chenopodium quinoa]	RecName: Full=Mitogen-activated protein kinase kinase kinase 17 {ECO:0000303|PubMed:25720833}; EC=2.7.11.25 {ECO:0000250|UniProtKB:Q9ZVP5, ECO:0000255|PROSITE-ProRule:PRU00159};	SubName: Full=Uncharacterized protein {ECO:0000313|EMBL:KNA23213.1};	MEKK and related serine/threonine protein kinases	GO:0005737,cytoplasm; GO:0005634,nucleus; GO:0005524,ATP binding; GO:0004709,MAP kinase kinase kinase activity; GO:0004674,protein serine/threonine kinase activity; GO:0004702,NA; GO:0009738,abscisic acid-activated signaling pathway; GO:0032147,activation of protein kinase activity; GO:0007346,regulation of mitotic cell cycle; GO:0009737,response to abscisic acid; GO:0006970,response to osmotic s…	Protein kinase domain
gene-LOC110688251	0.09	0.45	0.25	0	0	0	4	20	10	0	0	0	63.908	5.998	0.000320857	0.00566499	up	NW_018743920.1	6962167	6965374	+	LOC110688251	--	K05857 phosphatidylinositol phospholipase C, delta [EC:3.1.4.11] | (RefSeq) phosphoinositide phospholipase C 6-like (A)	phosphoinositide phospholipase C 6-like [Chenopodium quinoa]	RecName: Full=Phosphoinositide phospholipase C 4; EC=3.1.4.11; AltName: Full=Phosphoinositide phospholipase PLC4; Short=AtPLC4; Short=PI-PLC4;	RecName: Full=Phosphoinositide phospholipase C {ECO:0000256|RuleBase:RU361133}; EC=3.1.4.11 {ECO:0000256|RuleBase:RU361133};	Phosphoinositide-specific phospholipase C	GO:0005829,cytosol; GO:0005886,plasma membrane; GO:0004435,phosphatidylinositol phospholipase C activity; GO:0004871,NA; GO:0035556,intracellular signal transduction; GO:0016042,lipid catabolic process	Phosphatidylinositol-specific phospholipase C, X domain
gene-LOC110688265	2.16	3.82	3.62	0	0	0	157	272	232	0	0	0	1278.27	10.32	4.83315e-17	9.10801e-15	up	NW_018742309.1	3808891	3812971	-	LOC110688265	--	--	K(+) efflux antiporter 5-like isoform X1 [Chenopodium quinoa]	RecName: Full=K(+) efflux antiporter 5 {ECO:0000303|PubMed:11500563}; Short=AtKEA5 {ECO:0000303|PubMed:11500563}; Flags: Precursor;	SubName: Full=Uncharacterized protein {ECO:0000313|EMBL:KNA17736.1};	Predicted K+/H+-antiporter	GO:0016021,integral component of membrane; GO:0016020,membrane; GO:0022890,inorganic cation transmembrane transporter activity; GO:0015299,solute:proton antiporter activity; GO:0006813,potassium ion transport	Sodium/hydrogen exchanger family
gene-LOC110688270	2.16	2.28	1.9	0.82	0.23	1.49	116	120	90	43	12	77	2.88	1.526	0.0035703	0.0391366	up	NW_018743920.1	7085449	7090425	-	LOC110688270	--	K10140 DNA damage-binding protein 2 | (RefSeq) protein DAMAGED DNA-BINDING 2-like (A)	protein DAMAGED DNA-BINDING 2-like [Chenopodium quinoa]	RecName: Full=Protein DAMAGED DNA-BINDING 2; AltName: Full=UV-damaged DNA-binding protein 2;	SubName: Full=Uncharacterized protein {ECO:0000313|EMBL:KNA25911.1};	WD40 protein	GO:0080008,Cul4-RING E3 ubiquitin ligase complex; GO:0005634,nucleus; GO:0003684,damaged DNA binding; GO:0008270,zinc ion binding; GO:0006281,DNA repair; GO:0016567,protein ubiquitination; GO:0010224,response to UV-B	WD domain, G-beta repeat
gene-LOC110688300	31.69	7.38	28.13	2.98	2.17	3.49	1899	433	1485	175	125	202	8.688	3.119	6.73964e-09	3.81803e-07	up	NW_018743920.1	7342916	7348017	-	LOC110688300	--	K03147 phosphomethylpyrimidine synthase [EC:4.1.99.17] | (RefSeq) phosphomethylpyrimidine synthase, chloroplastic isoform X1 (A)	phosphomethylpyrimidine synthase, chloroplastic isoform X1 [Chenopodium quinoa]	RecName: Full=Phosphomethylpyrimidine synthase, chloroplastic; EC=4.1.99.17; AltName: Full=Hydroxymethylpyrimidine phosphate synthase; Short=HMP-P synthase; Short=HMP-phosphate synthase; Short=HMPP synthase; AltName: Full=Protein PYRIMIDINE REQUIRING; AltName: Full=Thiamine biosynthesis protein ThiC; Short=Protein THIAMINE C; Flags: Precursor;	SubName: Full=Uncharacterized protein {ECO:0000313|EMBL:KNA05284.1};	--	GO:0009507,chloroplast; GO:0009570,chloroplast stroma; GO:0009536,plastid; GO:0051539,4 iron, 4 sulfur cluster binding; GO:0080041,ADP-ribose pyrophosphohydrolase activity; GO:0016830,carbon-carbon lyase activity; GO:0051536,iron-sulfur cluster binding; GO:0046872,metal ion binding; GO:0019904,protein domain specific binding; GO:0010266,response to vitamin B1; GO:0009228,thiamine biosynthetic pro…	Radical SAM ThiC family
gene-LOC110688327	11.35	5.13	9.15	0.95	1.48	1.35	183	81	130	15	23	21	7.308	2.87	1.54466e-08	8.17505e-07	up	NW_018743920.1	7580489	7581848	-	LOC110688327	--	--	uncharacterized protein LOC110688327 [Chenopodium quinoa]	--	SubName: Full=Uncharacterized protein {ECO:0000313|EMBL:KNA02968.1};	--	--	--
gene-LOC110688344	43.45	35.17	35.26	13.7	16.72	7.8	912	723	652	282	338	158	3.017	1.593	0.00030625	0.00544614	up	NW_018743920.1	7757230	7758259	+	LOC110688344	--	K14686 solute carrier family 31 (copper transporter), member 1 | (RefSeq) copper transporter 6-like (A)	copper transporter 6-like [Chenopodium quinoa]	RecName: Full=Copper transporter 6; Short=AtCOPT6;	SubName: Full=Uncharacterized protein {ECO:0000313|EMBL:KNA10675.1};	Copper transporter	GO:0016021,integral component of membrane; GO:0005773,vacuole; GO:0005375,copper ion transmembrane transporter activity	Ctr copper transporter family
gene-LOC110688420	1.56	1.99	1.93	0.48	0.84	0.89	124	155	135	37	64	68	2.627	1.393	7.27054e-05	0.00159091	up	NW_018743920.1	8392793	8398808	-	LOC110688420	--	K17710 pentatricopeptide repeat domain-containing protein 1 | (RefSeq) pentatricopeptide repeat-containing protein At2g18940, chloroplastic (A)	pentatricopeptide repeat-containing protein At1g07590, mitochondrial-like [Chenopodium quinoa]	RecName: Full=Pentatricopeptide repeat-containing protein At1g07590, mitochondrial; Flags: Precursor;	SubName: Full=Uncharacterized protein {ECO:0000313|EMBL:KNA06965.1};	FOG: PPR repeat	GO:0043231,intracellular membrane-bounded organelle; GO:0005739,mitochondrion; GO:0004519,endonuclease activity; GO:0003723,RNA binding; GO:0046686,response to cadmium ion; GO:0009451,RNA modification	PPR repeat family
gene-LOC110688454	1.27	1.6	1.46	0.43	0.35	1.1	63	78	64	21	17	53	2.562	1.357	0.0019635	0.0245844	up	NW_018743920.1	8777043	8782099	+	LOC110688454	--	K14399 polyribonucleotide 5'-hydroxyl-kinase [EC:2.7.1.78] | (RefSeq) Clp1-domain-containing protein (A)	uncharacterized protein LOC110688454 [Chenopodium quinoa]	RecName: Full=Phosphatidylinositol/phosphatidylcholine transfer protein SFH2; AltName: Full=Protein SEC FOURTEEN HOMOLOGS 2; Short=AtSFH2;	SubName: Full=uncharacterized protein LOC108992996 {ECO:0000313|RefSeq:XP_018823290.1, ECO:0000313|RefSeq:XP_018823292.1};	Phosphatidylinositol transfer protein SEC14 and related proteins	GO:0000139,Golgi membrane; GO:0005886,plasma membrane; GO:0006656,phosphatidylcholine biosynthetic process; GO:0015031,protein transport	CRAL/TRIO domain
gene-LOC110688460	35.45	18.08	26.59	3.57	9.44	3.6	1450	724	958	143	372	142	4.869	2.284	4.76209e-05	0.0010959	up	NW_018743920.1	8827909	8832835	+	LOC110688460	--	--	--	--	--	--	--	--
gene-LOC110688475	130.15	55.36	155.91	43.95	45.64	25.77	2984	1243	3149	988	1008	570	3.049	1.608	0.00145704	0.0194426	up	NW_018743920.1	9074789	9075913	-	LOC110688475	--	K14841 ribosome biogenesis protein NSA1 | (RefSeq) WD repeat-containing protein DDB_G0290555 (A)	zinc finger protein ZAT8-like [Chenopodium quinoa]	RecName: Full=Zinc finger protein ZAT12; AltName: Full=Protein RESPONSIVE TO HIGH LIGHT 41;	SubName: Full=Uncharacterized protein {ECO:0000313|EMBL:KNA11901.1};	FOG: Zn-finger	GO:0005634,nucleus; GO:0003700,DNA-binding transcription factor activity; GO:0046872,metal ion binding; GO:0043565,sequence-specific DNA binding; GO:0009631,cold acclimation; GO:0042538,hyperosmotic salinity response; GO:0009643,photosynthetic acclimation; GO:0010200,response to chitin; GO:0009409,response to cold; GO:0009408,response to heat; GO:0009416,response to light stimulus; GO:0006979,res…	C2H2-type zinc finger
gene-LOC110688478	1.3	1.93	2	0.83	0.72	1.01	51	74	69	32	27	38	2.169	1.117	0.00172915	0.0221793	up	NW_018742309.1	4991148	4997046	+	LOC110688478	--	K09753 cinnamoyl-CoA reductase [EC:1.2.1.44] | (RefSeq) cinnamoyl-CoA reductase 1-like (A)	tetraketide alpha-pyrone reductase 1-like [Chenopodium quinoa]	RecName: Full=Tetraketide alpha-pyrone reductase 1; EC=1.1.1.-; AltName: Full=Protein DIHYDROFLAVONOL 4-REDUCTASE-LIKE 1;	SubName: Full=Cinnamoyl-CoA reductase 1 {ECO:0000313|EMBL:AIX92147.1};	Flavonol reductase/cinnamoyl-CoA reductase	GO:0005783,endoplasmic reticulum; GO:0005634,nucleus; GO:0050662,coenzyme binding; GO:0016491,oxidoreductase activity; GO:0009555,pollen development; GO:0010584,pollen exine formation; GO:0048316,seed development; GO:0080110,sporopollenin biosynthetic process	NAD dependent epimerase/dehydratase family
gene-LOC110688482	4.24	1.51	3.02	0.96	0.72	0.56	86	30	54	19	14	11	4.204	2.072	0.00088227	0.0129727	up	NW_018743920.1	9150875	9152231	-	LOC110688482	--	K09873 aquaporin TIP | (RefSeq) aquaporin TIP1-3-like (A)	aquaporin TIP1-3-like [Chenopodium quinoa]	RecName: Full=Aquaporin TIP1-3; AltName: Full=Gamma-tonoplast intrinsic protein 3; Short=Gamma-TIP3; AltName: Full=Tonoplast intrinsic protein 1-3; Short=AtTIP1;3;	SubName: Full=Uncharacterized protein {ECO:0000313|EMBL:KNA13069.1};	Aquaporin (major intrinsic protein family)	GO:0042807,central vacuole; GO:0005887,integral component of plasma membrane; GO:0009705,plant-type vacuole membrane; GO:0015204,urea transmembrane transporter activity; GO:0015250,water channel activity; GO:0034220,ion transmembrane transport; GO:0015840,urea transport; GO:0006833,water transport	Major intrinsic protein
gene-LOC110688483	2.85	4.27	2.54	0.74	0.41	0.98	130	191	102	33	18	43	4.938	2.304	7.76713e-10	5.19723e-08	up	NW_018743920.1	9144982	9150537	+	LOC110688483	--	K10703 very-long-chain (3R)-3-hydroxyacyl-CoA dehydratase [EC:4.2.1.134] | (RefSeq) very-long-chain (3R)-3-hydroxyacyl-CoA dehydratase 2-like (A)	very-long-chain (3R)-3-hydroxyacyl-CoA dehydratase 2-like [Chenopodium quinoa]	RecName: Full=Very-long-chain (3R)-3-hydroxyacyl-CoA dehydratase PASTICCINO 2A {ECO:0000305}; EC=4.2.1.134 {ECO:0000250|UniProtKB:Q8VZB2}; AltName: Full=3-hydroxyacyl-CoA dehydratase PASTICCINO 2A; Short=HACD; Short=PAS2A; AltName: Full=Protein tyrosine phosphatase-like protein;	RecName: Full=Very-long-chain (3R)-3-hydroxyacyl-CoA dehydratase {ECO:0000256|RuleBase:RU363109}; EC=4.2.1.134 {ECO:0000256|RuleBase:RU363109};	Protein tyrosine phosphatase-like protein PTPLA (contains Pro instead of catalytic Arg)	GO:0030176,integral component of endoplasmic reticulum membrane; GO:0102343,3-hydroxy-arachidoyl-CoA dehydratase activity; GO:0102344,3-hydroxy-behenoyl-CoA dehydratase activity; GO:0102345,3-hydroxy-lignoceroyl-CoA dehydratase activity; GO:0018812,3-hydroxyacyl-CoA dehydratase activity; GO:0102158,very-long-chain 3-hydroxyacyl-CoA dehydratase activity; GO:0030497,fatty acid elongation; GO:000727…	Protein tyrosine phosphatase-like protein, PTPLA
gene-LOC110688489	4.93	3.81	4.08	0.36	0.54	0.91	152	115	111	11	16	27	7.81	2.965	2.48209e-12	2.44475e-10	up	NW_018743920.1	9200168	9202335	-	LOC110688489	--	K14292 trimethylguanosine synthase [EC:2.1.1.-] | (RefSeq) trimethylguanosine synthase (A)	protein SODIUM POTASSIUM ROOT DEFECTIVE 1-like [Chenopodium quinoa]	RecName: Full=Protein SODIUM POTASSIUM ROOT DEFECTIVE 1 {ECO:0000303|PubMed:21193571}; Short=NaKR1 {ECO:0000303|PubMed:21193571}; AltName: Full=Heavy metal-associated plant protein 2 {ECO:0000303|PubMed:23368984}; Short=AtHPP02 {ECO:0000303|PubMed:23368984}; AltName: Full=Nuclear-enriched phloem companion cell gene 6 {ECO:0000303|PubMed:18354040}; Short=NPCC6 {ECO:0000303|PubMed:18354040};	SubName: Full=Uncharacterized protein {ECO:0000313|EMBL:KNA04420.1};	Copper chaperone	GO:0005737,cytoplasm; GO:0005783,endoplasmic reticulum; GO:0005634,nucleus; GO:0046872,metal ion binding; GO:0046914,transition metal ion binding; GO:0046916,cellular transition metal ion homeostasis; GO:0009908,flower development; GO:0030001,metal ion transport; GO:0010233,phloem transport; GO:0010015,root morphogenesis; GO:0055078,sodium ion homeostasis	Heavy-metal-associated domain
gene-LOC110688507	37.89	27.07	35.07	14.24	11.11	14.81	2000	1399	1631	737	565	754	2.686	1.426	2.18757e-07	9.21325e-06	up	NW_018743920.1	9468501	9471090	-	LOC110688507	--	K07195 exocyst complex component 7 | (RefSeq) exocyst complex component EXO70B1 (A)	exocyst complex component EXO70B1-like [Chenopodium quinoa]	RecName: Full=Exocyst complex component EXO70B1 {ECO:0000303|PubMed:23944713}; Short=AtExo70b1 {ECO:0000303|PubMed:23944713}; AltName: Full=Exocyst subunit Exo70 family protein B1 {ECO:0000303|PubMed:23944713};	SubName: Full=Uncharacterized protein {ECO:0000313|EMBL:KNA10568.1};	Exocyst component protein and related proteins	GO:0005829,cytosol; GO:0012505,endomembrane system; GO:0000145,exocyst; GO:0070062,extracellular exosome; GO:0045335,phagocytic vesicle; GO:0005886,plasma membrane; GO:0042742,defense response to bacterium; GO:0050832,defense response to fungus; GO:0006887,exocytosis; GO:0009789,positive regulation of abscisic acid-activated signaling pathway; GO:0090333,regulation of stomatal closure; GO:0009414…	Exo70 exocyst complex subunit
gene-LOC110688534	0.66	0.97	1.37	0.22	0.08	0.42	18	26	33	6	2	11	4.625	2.209	0.00163076	0.0212015	up	NW_018743920.1	9676797	9678498	-	LOC110688534	--	K08869 aarF domain-containing kinase | (RefSeq) predicted protein (A)	transcription factor DIVARICATA-like [Chenopodium quinoa]	RecName: Full=Transcription factor DIVARICATA;	SubName: Full=Uncharacterized protein {ECO:0000313|EMBL:KNA19213.1};	Zuotin and related molecular chaperones (DnaJ superfamily), contains DNA-binding domains	GO:0005634,nucleus; GO:0003677,DNA binding; GO:0048262,determination of dorsal/ventral asymmetry; GO:0009908,flower development; GO:0006355,regulation of transcription, DNA-templated; GO:0006351,transcription, DNA-templated	Myb-like DNA-binding domain
gene-LOC110688538	14.28	17.5	13.7	2.65	6.87	3.77	110	132	93	20	51	28	3.468	1.794	0.000323255	0.00569922	up	NW_018743920.1	4382786	4383163	+	LOC110688538	--	K07441 beta-1,4-N-acetylglucosaminyltransferase [EC:2.4.1.141] | (RefSeq) UDP-N-acetylglucosamine transferase subunit ALG14 homolog (A)	auxin-responsive protein SAUR41-like [Chenopodium quinoa]	RecName: Full=Auxin-responsive protein SAUR41 {ECO:0000305}; AltName: Full=Protein SMALL AUXIN UP RNA 41 {ECO:0000303|PubMed:12036261};	SubName: Full=Uncharacterized protein {ECO:0000313|EMBL:KNA03323.1};	--	GO:0005737,cytoplasm; GO:0060918,auxin transport; GO:0009734,auxin-activated signaling pathway; GO:0009958,positive gravitropism; GO:0040008,regulation of growth; GO:0090057,root radial pattern formation	Auxin responsive protein
gene-LOC110688682	25.18	26.09	22.27	8.19	5.68	12.8	1499	1521	1168	478	326	735	3.052	1.61	1.59829e-10	1.19989e-08	up	NW_018743937.1	432378	435394	-	LOC110688682	--	--	uncharacterized protein LOC110688682 [Chenopodium quinoa]	--	SubName: Full=Uncharacterized protein {ECO:0000313|EMBL:KNA20503.1};	--	--	von Willebrand factor type A domain
gene-LOC110688684	3.05	3.05	4.09	1.18	0.47	1.9	95	93	112	36	14	57	3.225	1.689	0.00016051	0.0031418	up	NW_018743937.1	543419	547548	-	LOC110688684	--	K13422 transcription factor MYC2 | (RefSeq) transcription factor MYC3-like (A)	transcription factor bHLH61-like [Chenopodium quinoa]	RecName: Full=Transcription factor bHLH93; AltName: Full=Basic helix-loop-helix protein 93; Short=AtbHLH93; Short=bHLH 93; AltName: Full=Transcription factor EN 47; AltName: Full=bHLH transcription factor bHLH093;	SubName: Full=Uncharacterized protein {ECO:0000313|EMBL:KNA15310.1}; Flags: Fragment;	--	GO:0005634,nucleus; GO:0003677,DNA binding; GO:0003700,DNA-binding transcription factor activity; GO:0046983,protein dimerization activity; GO:0045487,gibberellin catabolic process; GO:0007275,multicellular organism development; GO:0010371,regulation of gibberellin biosynthetic process; GO:0006351,transcription, DNA-templated	Helix-loop-helix DNA-binding domain
gene-LOC110688690	0.95	1.18	1.13	0.18	0.43	0.27	55	67	58	10	24	15	3.836	1.94	0.000158495	0.00310865	up	NW_018743937.1	878401	884033	+	LOC110688690	--	--	phosphoglycerate mutase-like protein 1 [Chenopodium quinoa]	RecName: Full=Phosphoglycerate mutase-like protein 1 {ECO:0000305};	SubName: Full=Uncharacterized protein {ECO:0000313|EMBL:KNA09986.1};	Predicted phosphoglycerate mutase	GO:0005829,cytosol	Histidine phosphatase superfamily (branch 1)
gene-LOC110688694	3.51	5.43	5.75	2.56	2.29	2.86	70	106	101	50	44	55	2.002	1.002	0.00209765	0.0258092	up	NW_018743937.1	1207646	1208896	-	LOC110688694	--	--	--	--	--	--	--	--
gene-LOC110688716	86.54	98.27	150.97	40.97	28.78	35.1	3455	3842	5310	1604	1107	1352	3.36	1.749	3.38945e-09	2.01598e-07	up	NW_018743937.1	2251803	2260726	+	LOC110688716	--	K13811 3'-phosphoadenosine 5'-phosphosulfate synthase [EC:2.7.7.4 2.7.1.25] | (RefSeq) ATP sulfurylase 2-like (A)	ATP sulfurylase 2-like [Chenopodium quinoa]	RecName: Full=ATP sulfurylase 2; EC=2.7.7.4; Flags: Precursor;	SubName: Full=Uncharacterized protein {ECO:0000313|EMBL:KNA22192.1};	ATP sulfurylase (sulfate adenylyltransferase)	GO:0009507,chloroplast; GO:0009570,chloroplast stroma; GO:0005829,cytosol; GO:0004020,adenylylsulfate kinase activity; GO:0005524,ATP binding; GO:0004781,sulfate adenylyltransferase (ATP) activity; GO:0009970,cellular response to sulfate starvation; GO:0070814,hydrogen sulfide biosynthetic process; GO:0000103,sulfate assimilation	ATP-sulfurylase
gene-LOC110688719	12.73	19.41	19.54	6.49	6.44	7.27	312	466	422	156	152	172	2.672	1.418	1.56894e-08	8.25504e-07	up	NW_018743937.1	2447692	2448894	+	LOC110688719	--	K14488 SAUR family protein | (RefSeq) auxin-responsive protein SAUR50-like (A)	auxin-responsive protein SAUR50-like [Chenopodium quinoa]	RecName: Full=Auxin-responsive protein SAUR50 {ECO:0000303|PubMed:12036261}; AltName: Full=Protein SMALL AUXIN UP RNA 50 {ECO:0000303|PubMed:12036261};	SubName: Full=Uncharacterized protein {ECO:0000313|EMBL:KMS95424.1};	--	GO:0009734,auxin-activated signaling pathway; GO:0040008,regulation of growth	Auxin responsive protein
gene-LOC110688722	3.89	3.2	3.99	0.5	0.3	0.87	134	108	121	17	10	29	7.342	2.876	2.34795e-12	2.33128e-10	up	NW_018743937.1	2819539	2846001	+	LOC110688722	--	--	--	--	--	--	--	--
gene-LOC110688748	10.26	9.87	11	2.14	1.95	2.95	469	442	443	96	86	130	4.772	2.255	1.4435e-22	5.44053e-20	up	NW_018743937.1	4061237	4069267	+	LOC110688748	--	K00854 xylulokinase [EC:2.7.1.17] | (RefSeq) xylulose kinase-like (A)	xylulose kinase-like [Chenopodium quinoa]	RecName: Full=Xylulose kinase 2 {ECO:0000303|PubMed:16920870}; Short=Atxk-2 {ECO:0000303|PubMed:16920870}; Short=Xylulokinase 2 {ECO:0000305}; EC=2.7.1.17 {ECO:0000269|PubMed:16920870}; AltName: Full=1-Deoxy-D-Xylulokinase {ECO:0000303|PubMed:16920870}; Short=DXK {ECO:0000303|PubMed:16920870};	SubName: Full=Uncharacterized protein {ECO:0000313|EMBL:KNA13003.1};	Sugar (pentulose and hexulose) kinases	GO:0005829,cytosol; GO:0004856,xylulokinase activity; GO:0005997,xylulose metabolic process	FGGY family of carbohydrate kinases, C-terminal domain
gene-LOC110688815	5.78	7.08	5.25	0	0	0	45	54	36	0	0	0	262.082	8.034	4.89723e-10	3.40008e-08	up	NW_018742312.1	148322	149400	+	LOC110688815	--	--	--	--	--	--	--	--
gene-LOC110688825	12.84	13.36	8.64	6.05	4.68	6.53	587	598	348	271	206	288	2.169	1.117	9.44442e-05	0.00199908	up	NW_018743942.1	1198903	1204451	+	LOC110688825	--	K05349 beta-glucosidase [EC:3.2.1.21] | (RefSeq) uncharacterized protein LOC110688825 (A)	uncharacterized protein LOC110688825 [Chenopodium quinoa]	RecName: Full=Beta-xylosidase/alpha-L-arabinofuranosidase 2 {ECO:0000303|PubMed:17615411, ECO:0000312|EMBL:ABQ45228.1}; AltName: Full=Xylan 1,4-beta-xylosidase/Alpha-L-arabinofuranosidase 2; Short=MsXyl2 {ECO:0000303|PubMed:17615411}; Includes: RecName: Full=Beta-xylosidase; EC=3.2.1.37; AltName: Full=1,4-beta-D-xylan xylohydrolase {ECO:0000250|UniProtKB:P48792}; AltName: Full=Xylan 1,4-beta-xylo…	SubName: Full=Uncharacterized protein {ECO:0000313|EMBL:KNA06938.1};	--	GO:0005578,NA; GO:0046556,alpha-L-arabinofuranosidase activity; GO:0009044,xylan 1,4-beta-xylosidase activity; GO:0045493,xylan catabolic process	Glycosyl hydrolase family 3 N terminal domain
gene-LOC110688857	0.1	0.14	0.23	0.01	0	0.01	10	14	21	1	0	1	25.056	4.647	0.000378747	0.00647358	up	NW_018743942.1	2048524	2055853	+	LOC110688857	--	--	uncharacterized protein LOC110688857 [Chenopodium quinoa]	--	SubName: Full=Uncharacterized protein {ECO:0000313|EMBL:KMS95688.1};	--	--	Ulp1 protease family, C-terminal catalytic domain
gene-LOC110688858	0.27	0.24	0.42	0	0	0	14	12	19	0	0	0	88.997	6.476	1.18964e-05	0.000326939	up	NW_018743942.1	2065469	2075796	-	LOC110688858	--	--	--	--	--	--	--	--
gene-LOC110688937	2.6	3.99	3.92	0.04	0.08	0.08	64	96	85	1	2	2	53.049	5.729	3.82167e-14	4.93556e-12	up	NW_018743946.1	71090	73504	-	LOC110688937	--	--	--	--	--	--	--	--
gene-LOC110688954	0.73	1.67	1.23	0.1	0.02	0.02	31	69	46	4	1	1	25.747	4.686	6.7006e-09	3.80174e-07	up	NW_018743946.1	969726	994967	+	LOC110688954	--	K13065 shikimate O-hydroxycinnamoyltransferase [EC:2.3.1.133] | (RefSeq) shikimate O-hydroxycinnamoyltransferase-like (A)	shikimate O-hydroxycinnamoyltransferase-like [Chenopodium quinoa]	RecName: Full=Shikimate O-hydroxycinnamoyltransferase; EC=2.3.1.133; AltName: Full=Hydroxycinnamoyl transferase; AltName: Full=Hydroxycinnamoyl-Coenzyme A shikimate/quinate hydroxycinnamoyltransferase;	SubName: Full=Uncharacterized protein {ECO:0000313|EMBL:CCB45012.1};	--	GO:0047172,shikimate O-hydroxycinnamoyltransferase activity	Transferase family
gene-LOC110688956	61.26	51.92	46.37	29.79	25.23	27.83	4070	3378	2714	1941	1615	1784	2.047	1.034	0.000160228	0.00313795	up	NW_018743946.1	1007699	1018369	-	LOC110688956	--	K00703 starch synthase [EC:2.4.1.21] | (RefSeq) granule-bound starch synthase 2, chloroplastic/amyloplastic-like (A)	granule-bound starch synthase 2, chloroplastic/amyloplastic-like [Chenopodium quinoa]	RecName: Full=Granule-bound starch synthase 2, chloroplastic/amyloplastic; EC=2.4.1.21; AltName: Full=Granule-bound starch synthase II; Short=GBSS-II; Short=SS II; Flags: Precursor;	RecName: Full=Starch synthase, chloroplastic/amyloplastic {ECO:0000256|RuleBase:RU361232}; EC=2.4.1.- {ECO:0000256|RuleBase:RU361232};	--	GO:0009501,amyloplast; GO:0009507,chloroplast; GO:0033201,alpha-1,4-glucan synthase activity; GO:0004373,glycogen (starch) synthase activity; GO:0009011,starch synthase activity; GO:0019252,starch biosynthetic process	Starch synthase catalytic domain
gene-LOC110689184	2.74	0.11	4.05	0	0	0	129	5	168	0	0	0	623.032	9.283	4.27323e-05	0.000999594	up	NW_018743955.1	2891548	2894002	+	LOC110689184	--	--	--	--	--	--	--	--
gene-LOC110689236	1.05	0.8	0.71	0	0	0	20	15	12	0	0	0	92.459	6.531	8.59233e-06	0.000245071	up	NW_018743955.1	5539249	5540339	+	LOC110689236	--	--	--	--	--	--	--	--
gene-LOC110689263	4.16	3.67	4.35	2.09	1.45	2.71	140	121	129	69	47	88	2.125	1.088	0.000317922	0.00561987	up	NW_018743955.1	6250718	6256323	+	LOC110689263	--	K10773 endonuclease III [EC:4.2.99.18] | (RefSeq) endonuclease III homolog 1, chloroplastic-like isoform X1 (A)	endonuclease III homolog 1, chloroplastic-like isoform X1 [Chenopodium quinoa]	RecName: Full=Endonuclease III homolog 1, chloroplastic {ECO:0000255|HAMAP-Rule:MF_03183}; Short=AtNTH1; EC=3.2.2.- {ECO:0000255|HAMAP-Rule:MF_03183}; EC=4.2.99.18 {ECO:0000255|HAMAP-Rule:MF_03183}; AltName: Full=Bifunctional DNA N-glycosylase/DNA-(apurinic or apyrimidinic site) lyase 1 {ECO:0000255|HAMAP-Rule:MF_03183}; Short=DNA glycosylase/AP lyase 1 {ECO:0000255|HAMAP-Rule:MF_03183}; Flags: P…	RecName: Full=Endonuclease III homolog {ECO:0000256|HAMAP-Rule:MF_03183}; EC=3.2.2.- {ECO:0000256|HAMAP-Rule:MF_03183}; EC=4.2.99.18 {ECO:0000256|HAMAP-Rule:MF_03183}; AltName: Full=Bifunctional DNA N-glycosylase/DNA-(apurinic or apyrimidinic site) lyase {ECO:0000256|HAMAP-Rule:MF_03183}; Short=DNA glycosylase/AP lyase {ECO:0000256|HAMAP-Rule:MF_03183};	Endonuclease III	GO:0042644,chloroplast nucleoid; GO:0005634,nucleus; GO:0051539,4 iron, 4 sulfur cluster binding; GO:0140078,class I DNA-(apurinic or apyrimidinic site) endonuclease activity; GO:0140080,class III/IV DNA-(apurinic or apyrimidinic site) endonuclease activity; GO:0003677,DNA binding; GO:0019104,DNA N-glycosylase activity; GO:0003906,DNA-(apurinic or apyrimidinic site) endonuclease activity; GO:0046…	HhH-GPD superfamily base excision DNA repair protein
gene-LOC110689264	3.41	5.22	5.58	2.13	2.49	2.33	88	132	127	54	62	58	2.115	1.08	0.00156331	0.0205052	up	NW_018743955.1	6256279	6261408	-	LOC110689264	--	K05955 protein farnesyltransferase/geranylgeranyltransferase type-1 subunit alpha [EC:2.5.1.58 2.5.1.59] | (RefSeq) protein farnesyltransferase/geranylgeranyltransferase type-1 subunit alpha-like (A)	protein farnesyltransferase/geranylgeranyltransferase type-1 subunit alpha-like [Chenopodium quinoa]	RecName: Full=Protein farnesyltransferase/geranylgeranyltransferase type-1 subunit alpha; EC=2.5.1.58; EC=2.5.1.59; AltName: Full=CAAX farnesyltransferase subunit alpha; AltName: Full=FTase-alpha; AltName: Full=Ras proteins prenyltransferase subunit alpha; AltName: Full=Type I protein geranyl-geranyltransferase subunit alpha; Short=GGTase-I-alpha;	SubName: Full=Uncharacterized protein {ECO:0000313|EMBL:KNA16504.1};	Protein farnesyltransferase, alpha subunit/protein geranylgeranyltransferase type I, alpha subunit	GO:0005953,CAAX-protein geranylgeranyltransferase complex; GO:0005965,protein farnesyltransferase complex; GO:0004662,CAAX-protein geranylgeranyltransferase activity; GO:0004660,protein farnesyltransferase activity; GO:0004661,protein geranylgeranyltransferase activity; GO:0018343,protein farnesylation; GO:0018344,protein geranylgeranylation	Protein prenyltransferase alpha subunit repeat
gene-LOC110689268	0.77	0.8	0.79	0.29	0.19	0.46	83	84	75	30	20	48	2.763	1.466	5.3829e-05	0.00121902	up	NW_018743955.1	6339979	6345234	-	LOC110689268	--	--	--	--	--	--	--	--
gene-LOC110689290	6.63	7.39	7.16	0	0	0	305	333	290	0	0	0	1812.32	10.824	3.7855e-19	9.84657e-17	up	NW_018743955.1	6620608	6625655	+	LOC110689290	--	--	--	--	--	--	--	--
gene-LOC110689334	3.9	1.43	2.35	0.71	0.89	0.54	186	67	99	33	41	25	3.799	1.926	0.000666181	0.0103474	up	NW_018743955.1	7030691	7034444	+	LOC110689334	--	--	--	--	--	--	--	--
gene-LOC110689341	0.48	0.46	0.64	0	0	0.05	21	20	25	0	0	2	37.601	5.233	3.01688e-05	0.00073747	up	NW_018743955.1	7146449	7151395	-	LOC110689341	--	K01657 anthranilate synthase component I [EC:4.1.3.27] | (RefSeq) anthranilate synthase alpha subunit 2, chloroplastic-like (A)	uncharacterized protein LOC110689341 isoform X1 [Chenopodium quinoa]	--	--	--	--	--
gene-LOC110689435	3.12	5.18	4.15	1.67	1.28	3.22	193	314	226	101	76	192	2.219	1.15	0.000279364	0.0050261	up	NW_018743955.1	8224874	8229553	+	LOC110689435	--	K12119 cryptochrome 2 | (RefSeq) cryptochrome-1-like (A)	cryptochrome-1-like [Chenopodium quinoa]	RecName: Full=Cryptochrome-2 {ECO:0000303|Ref.2}; Short=Atcry2 {ECO:0000303|Ref.2}; AltName: Full=Blue light photoreceptor {ECO:0000303|PubMed:9003312}; AltName: Full=Protein PHR homolog 1 {ECO:0000303|PubMed:9003312}; Short=AtPHH1 {ECO:0000303|PubMed:9003312}; AltName: Full=Protein SUPPRESSOR OF elf3 20 {ECO:0000303|PubMed:21296763};	SubName: Full=Uncharacterized protein {ECO:0000313|EMBL:KNA12983.1};	Deoxyribodipyrimidine photolyase/cryptochrome	GO:0005737,cytoplasm; GO:0016604,nuclear body; GO:0005634,nucleus; GO:0016605,PML body; GO:0005773,vacuole; GO:0005524,ATP binding; GO:0009882,blue light photoreceptor activity; GO:0071949,FAD binding; GO:0042802,identical protein binding; GO:0046872,metal ion binding; GO:0009785,blue light signaling pathway; GO:0006325,chromatin organization; GO:0006338,chromatin remodeling; GO:0010617,circadian…	FAD binding domain of DNA photolyase
gene-LOC110689478	0.58	0	0.97	0	0	0	15	0	22	0	0	0	76.374	6.255	0.00415078	0.0434931	up	NW_018743955.1	5501057	5506036	-	LOC110689478	--	K08101 phytochromobilin:ferredoxin oxidoreductase [EC:1.3.7.4] | (RefSeq) phytochromobilin:ferredoxin oxidoreductase, chloroplastic-like (A)	phytochromobilin:ferredoxin oxidoreductase, chloroplastic-like [Chenopodium quinoa]	RecName: Full=Phytochromobilin:ferredoxin oxidoreductase, chloroplastic; EC=1.3.7.4; AltName: Full=PFB synthase; AltName: Full=PPhiB synthase; AltName: Full=Phytochromobilin synthase; Flags: Precursor;	SubName: Full=Uncharacterized protein {ECO:0000313|EMBL:KNA09847.1};	--	GO:0009507,chloroplast; GO:0050897,cobalt ion binding; GO:0050619,phytochromobilin:ferredoxin oxidoreductase activity; GO:0010019,chloroplast-nucleus signaling pathway; GO:0010024,phytochromobilin biosynthetic process	Ferredoxin-dependent bilin reductase
gene-LOC110689479	0.63	1.75	1.95	0	0	0	7	19	19	0	0	0	86.781	6.439	2.44542e-05	0.000614453	up	NW_018743955.1	5540515	5541433	-	LOC110689479	--	--	remorin-like, partial [Chenopodium quinoa]	RecName: Full=Remorin; AltName: Full=pp34;	SubName: Full=Uncharacterized protein {ECO:0000313|EMBL:KMS95286.1};	--	GO:0005886,plasma membrane; GO:0048032,galacturonate binding; GO:0007267,cell-cell signaling	Remorin, C-terminal region
gene-LOC110689583	9.8	7.83	5.2	2.18	0.57	4.59	124	97	58	27	7	56	3.669	1.875	0.00237816	0.0284271	up	NW_018743957.1	7534	8154	-	LOC110689583	--	--	trypsin inhibitor DE-3-like [Chenopodium quinoa]	RecName: Full=Trypsin inhibitor DE-3; AltName: Full=ETIA;	SubName: Full=Uncharacterized protein {ECO:0000313|EMBL:KNA14861.1};	--	GO:0004867,serine-type endopeptidase inhibitor activity	Trypsin and protease inhibitor
gene-LOC110689589	0.02	0.58	0.65	0	0	0.06	1	28	28	0	0	3	22.423	4.487	0.00468162	0.047689	up	NW_018743969.1	2075	12974	-	LOC110689589	--	K09422 transcription factor MYB, plant | (RefSeq) transcription factor MYB3R-3-like (A)	transcription factor MYB3R-3-like [Chenopodium quinoa]	RecName: Full=Transcription factor MYB3R-5 {ECO:0000303|PubMed:11597504}; AltName: Full=Myb-related protein 3R-5 {ECO:0000303|PubMed:11597504};	SubName: Full=Uncharacterized protein {ECO:0000313|EMBL:KNA18437.1};	Transcription factor, Myb superfamily	GO:0005634,nucleus; GO:0003700,DNA-binding transcription factor activity; GO:0000981,DNA-binding transcription factor activity, RNA polymerase II-specific; GO:0043565,sequence-specific DNA binding; GO:0001135,RNA polymerase II transcription regulator recruiting activity; GO:0044212,transcription regulatory region DNA binding; GO:0030154,cell differentiation; GO:0008285,negative regulation of cell…	Myb-like DNA-binding domain
gene-LOC110689711	15.46	13.94	12.06	4.37	3.55	4	429	379	295	119	95	107	3.701	1.888	1.39671e-10	1.06589e-08	up	NW_018743977.1	1373107	1374632	+	LOC110689711	--	--	uncharacterized protein LOC110689711 [Chenopodium quinoa]	--	SubName: Full=Uncharacterized protein {ECO:0000313|EMBL:KNA18133.1};	--	GO:0006396,RNA processing	Tetratricopeptide repeat
gene-LOC110689723	0.75	1.86	1.13	0.32	0.34	0.3	36	88	48	15	16	14	3.975	1.991	9.28535e-05	0.00196879	up	NW_018742329.1	1449	4197	-	LOC110689723	--	K01611 S-adenosylmethionine decarboxylase [EC:4.1.1.50] | (RefSeq) S-adenosylmethionine decarboxylase proenzyme-like (A)	S-adenosylmethionine decarboxylase proenzyme-like [Chenopodium quinoa]	RecName: Full=S-adenosylmethionine decarboxylase proenzyme; Short=AdoMetDC; Short=SAMDC; EC=4.1.1.50; Contains: RecName: Full=S-adenosylmethionine decarboxylase alpha chain; Contains: RecName: Full=S-adenosylmethionine decarboxylase beta chain; Flags: Precursor;	SubName: Full=Uncharacterized protein {ECO:0000313|EMBL:KNA03058.1};	S-adenosylmethionine decarboxylase	GO:0005829,cytosol; GO:0004014,adenosylmethionine decarboxylase activity; GO:0006557,S-adenosylmethioninamine biosynthetic process; GO:0008295,spermidine biosynthetic process; GO:0006597,spermine biosynthetic process	Adenosylmethionine decarboxylase
gene-LOC110689729	0.58	0.91	1.76	0	0	0	13	20	35	0	0	0	133.7	7.063	1.02996e-06	3.72236e-05	up	NW_018743977.1	1753591	1754695	-	LOC110689729	--	--	--	--	--	--	--	--
gene-LOC110689751	0.8	0.27	0.76	0.16	0.15	0.26	51	17	43	10	9	16	3.614	1.854	0.00422299	0.0440482	up	NW_018743977.1	2044909	2051181	-	LOC110689751	--	K05941 glutathione gamma-glutamylcysteinyltransferase [EC:2.3.2.15] | (RefSeq) glutathione gamma-glutamylcysteinyltransferase 3-like (A)	glutathione gamma-glutamylcysteinyltransferase 3-like [Chenopodium quinoa]	RecName: Full=Glutathione gamma-glutamylcysteinyltransferase 1; EC=2.3.2.15; AltName: Full=LjPCS1-8R; AltName: Full=Phytochelatin synthase 1;	SubName: Full=Uncharacterized protein {ECO:0000313|EMBL:KNA23610.1};	Phytochelatin synthase	GO:0016756,glutathione gamma-glutamylcysteinyltransferase activity; GO:0046872,metal ion binding; GO:0046938,phytochelatin biosynthetic process; GO:0010038,response to metal ion	Domain of unknown function (DUF1984)
gene-LOC110689817	14.47	1.64	12.68	0.01	0.01	0	1008	112	778	1	1	0	1058.65	10.048	1.48751e-15	2.31825e-13	up	NW_018743977.1	3601682	3607071	-	LOC110689817	--	K15255 ATP-dependent DNA helicase PIF1 [EC:3.6.4.12] | (RefSeq) uncharacterized protein LOC107022360 (A)	uncharacterized protein LOC110689817 isoform X1 [Chenopodium quinoa]	--	SubName: Full=uncharacterized protein LOC108984871 {ECO:0000313|RefSeq:XP_018812501.1};	DNA helicase PIF1/RRM3	--	Helitron helicase-like domain at N-terminus
gene-LOC110689845	0.59	0	0.53	0	0	0	24	0	19	0	0	0	89.033	6.476	0.00246111	0.029267	up	NW_018743977.1	552767	555196	+	LOC110689845	--	K19984 exocyst complex component 5 | (RefSeq) uncharacterized protein LOC113272286 (A)	zinc finger BED domain-containing protein RICESLEEPER 2-like [Chenopodium quinoa]	RecName: Full=Zinc finger BED domain-containing protein RICESLEEPER 2; AltName: Full=Transposase-like protein RICESLEEPER 2;	SubName: Full=Uncharacterized protein {ECO:0000313|EMBL:KNA20152.1};	Tam3-transposase (Ac family)	GO:0005634,nucleus; GO:0003700,DNA-binding transcription factor activity; GO:0046872,metal ion binding; GO:0046983,protein dimerization activity; GO:0000977,RNA polymerase II regulatory region sequence-specific DNA binding; GO:0009791,post-embryonic development; GO:0006357,regulation of transcription by RNA polymerase II; GO:0006351,transcription, DNA-templated	Domain of unknown function (DUF4413)
gene-LOC110689863	0.38	0.28	0.31	0.01	0.05	0.14	26	19	19	1	3	9	5.681	2.506	0.00213111	0.0260991	up	NW_018743977.1	1725736	1729697	-	LOC110689863	--	K13415 protein brassinosteroid insensitive 1 [EC:2.7.10.1 2.7.11.1] | (RefSeq) brassinosteroid LRR receptor kinase BRI1 (A)	MDIS1-interacting receptor like kinase 2-like [Chenopodium quinoa]	RecName: Full=MDIS1-interacting receptor like kinase 2 {ECO:0000303|PubMed:26863186}; Short=AtMIK2 {ECO:0000303|PubMed:26863186}; AltName: Full=Probable LRR receptor-like serine/threonine-protein kinase At4g08850; EC=2.7.11.1 {ECO:0000305}; Flags: Precursor;	SubName: Full=Uncharacterized protein {ECO:0000313|EMBL:KNA23470.1};	--	GO:0016021,integral component of membrane; GO:0016020,membrane; GO:0005886,plasma membrane; GO:0009506,plasmodesma; GO:0090406,pollen tube; GO:0005524,ATP binding; GO:0004674,protein serine/threonine kinase activity	Leucine rich repeat
gene-LOC110689918	0.5	0.11	0.27	0	0	0	19	4	9	0	0	0	64.958	6.021	0.000427902	0.00713543	up	NW_018743977.1	799222	802096	-	LOC110689918	--	--	uncharacterized protein LOC110689918 [Chenopodium quinoa]	--	--	--	--	--
gene-LOC110690063	3.51	1.12	5.65	1.09	0.98	1.37	427	134	606	130	115	161	3.25	1.7	0.00189598	0.0238847	up	NW_018742329.1	2476301	2486099	-	LOC110690063	--	--	uncharacterized protein LOC110690063 isoform X1 [Chenopodium quinoa]	--	SubName: Full=Uncharacterized protein {ECO:0000313|EMBL:KNA02738.1}; Flags: Fragment;	--	--	--
gene-LOC110690139	4.06	2.93	3.86	0.05	0.13	0.08	160	113	134	2	5	3	44.311	5.47	1.89147e-19	5.02615e-17	up	NW_018742329.1	2746810	2762787	-	LOC110690139	--	K03797 carboxyl-terminal processing protease [EC:3.4.21.102] | (RefSeq) carboxyl-terminal-processing peptidase 1, chloroplastic-like (A)	carboxyl-terminal-processing peptidase 1, chloroplastic-like [Chenopodium quinoa]	RecName: Full=Carboxyl-terminal-processing peptidase 1, chloroplastic; EC=3.4.21.102; AltName: Full=D1 C-terminal processing protease 1; AltName: Full=Photosystem II D1 protein processing peptidase 1; Flags: Precursor;	SubName: Full=Uncharacterized protein {ECO:0000313|EMBL:KNA22820.1};	--	GO:0009543,chloroplast thylakoid lumen; GO:0031977,thylakoid lumen; GO:0004175,endopeptidase activity; GO:0008236,serine-type peptidase activity	Peptidase family S41
gene-LOC110690151	1.39	1.71	0.93	0.3	0.35	1.04	112	135	66	24	27	81	2.703	1.435	0.00349138	0.0385063	up	NW_018743987.1	2828407	2836539	-	LOC110690151	--	K01181 endo-1,4-beta-xylanase [EC:3.2.1.8] | (RefSeq) probable endo-1,4-beta-xylanase C (A)	uncharacterized protein LOC110690151 isoform X1 [Chenopodium quinoa]	RecName: Full=Putative Pol polyprotein from transposon element Bs1; Short=ORF 1;	SubName: Full=Uncharacterized protein {ECO:0000313|EMBL:KNA05790.1};	--	GO:0000166,nucleotide binding	Carbohydrate binding domain
gene-LOC110690203	3.04	3.45	3.18	0.05	0.25	0.1	63	70	58	1	5	2	25.381	4.666	8.99891e-12	8.06757e-10	up	NW_018743992.1	10036	15010	-	LOC110690203	--	--	succinate dehydrogenase assembly factor 2, mitochondrial-like [Chenopodium quinoa]	RecName: Full=Succinate dehydrogenase assembly factor 2, mitochondrial {ECO:0000305}; Short=SDH assembly factor 2 {ECO:0000305}; Flags: Precursor;	SubName: Full=Uncharacterized protein {ECO:0000313|EMBL:KNA10602.1};	Uncharacterized conserved protein	GO:0005739,mitochondrion; GO:0006121,mitochondrial electron transport, succinate to ubiquinone; GO:0034553,mitochondrial respiratory chain complex II assembly; GO:0018293,protein-FAD linkage; GO:0006099,tricarboxylic acid cycle	Flavinator of succinate dehydrogenase
gene-LOC110690204	0.87	0.78	1.51	0	0	0	17	15	26	0	0	0	114.814	6.843	1.83555e-06	6.20934e-05	up	NW_018743992.1	40027	42078	-	LOC110690204	--	--	--	--	--	--	--	--
gene-LOC110690260	4.34	5.33	5.99	0	0	0	212	255	258	0	0	0	1416.36	10.468	7.86428e-18	1.73937e-15	up	NW_018744026.1	3946363	3956101	-	LOC110690260	--	--	--	--	--	--	--	--
gene-LOC110690262	0.63	1.34	1.31	0	0	0	16	33	29	0	0	0	150.551	7.234	1.56377e-07	6.8193e-06	up	NW_018744026.1	4482023	4483500	+	LOC110690262	--	--	uncharacterized protein LOC110690262 [Chenopodium quinoa]	--	SubName: Full=Uncharacterized protein {ECO:0000313|EMBL:KNA09889.1};	--	GO:0005524,ATP binding	--
gene-LOC110690295	7.91	10.49	13.42	0	0	0	305	396	456	0	0	0	2262.45	11.144	7.51933e-20	2.22187e-17	up	NW_018744026.1	3956734	3968732	+	LOC110690295	--	K14778 ATP-dependent RNA helicase DDX49/DBP8 [EC:3.6.4.13] | (RefSeq) DEAD-box ATP-dependent RNA helicase 36-like (A)	DEAD-box ATP-dependent RNA helicase 36-like [Chenopodium quinoa]	RecName: Full=DEAD-box ATP-dependent RNA helicase 36; EC=3.6.4.13;	SubName: Full=Uncharacterized protein {ECO:0000313|EMBL:KNA25385.1};	ATP-dependent RNA helicase	GO:0005737,cytoplasm; GO:0005730,nucleolus; GO:0005634,nucleus; GO:0090406,pollen tube; GO:0005524,ATP binding; GO:0004004,ATP-dependent RNA helicase activity; GO:0003676,nucleic acid binding; GO:0009553,embryo sac development; GO:0009561,megagametogenesis; GO:0009791,post-embryonic development; GO:0010501,RNA secondary structure unwinding; GO:0006364,rRNA processing	DEAD/DEAH box helicase
gene-LOC110690305	26.76	33.62	33.95	4.59	5.1	4.44	1112	1368	1243	187	204	178	6.906	2.788	9.49439e-26	5.2341e-23	up	NW_018744026.1	4746084	4777914	+	LOC110690305	--	K16054 methylthioribulose 1-phosphate dehydratase / enolase-phosphatase E1 [EC:4.2.1.109 3.1.3.77] | (RefSeq) probable bifunctional methylthioribulose-1-phosphate dehydratase/enolase-phosphatase E1 1 (A)	probable bifunctional methylthioribulose-1-phosphate dehydratase/enolase-phosphatase E1 1 [Chenopodium quinoa]	RecName: Full=Probable bifunctional methylthioribulose-1-phosphate dehydratase/enolase-phosphatase E1 1 {ECO:0000255|HAMAP-Rule:MF_03118}; Includes: RecName: Full=Methylthioribulose-1-phosphate dehydratase {ECO:0000255|HAMAP-Rule:MF_03118}; Short=MTRu-1-P dehydratase {ECO:0000255|HAMAP-Rule:MF_03118}; EC=4.2.1.109 {ECO:0000255|HAMAP-Rule:MF_03118}; Includes: RecName: Full=Enolase-phosphatase E1 {…	RecName: Full=Probable bifunctional methylthioribulose-1-phosphate dehydratase/enolase-phosphatase E1 {ECO:0000256|HAMAP-Rule:MF_03118}; Includes: RecName: Full=Enolase-phosphatase E1 {ECO:0000256|HAMAP-Rule:MF_03118}; EC=3.1.3.77 {ECO:0000256|HAMAP-Rule:MF_03118}; AltName: Full=2,3-diketo-5-methylthio-1-phosphopentane phosphatase {ECO:0000256|HAMAP-Rule:MF_03118}; Includes: RecName: Full=Methylt…	Enolase-phosphatase E-1	GO:0005737,cytoplasm; GO:0043874,acireductone synthase activity; GO:0000287,magnesium ion binding; GO:0046570,methylthioribulose 1-phosphate dehydratase activity; GO:0019509,L-methionine salvage from methylthioadenosine	Class II Aldolase and Adducin N-terminal domain
gene-LOC110690367	7.13	9.12	9.1	1.52	0.6	1.34	210	263	236	44	17	38	7.869	2.976	1.15358e-17	2.49174e-15	up	NW_018744032.1	870291	877062	+	LOC110690367	--	K02864 large subunit ribosomal protein L10 | (RefSeq) 50S ribosomal protein L10, chloroplastic-like (A)	50S ribosomal protein L10, chloroplastic-like [Chenopodium quinoa]	RecName: Full=Gamma carbonic anhydrase 1, mitochondrial; Short=AtCA1; Short=GAMMA CA1; EC=4.2.1.-; Flags: Precursor;	SubName: Full=Uncharacterized protein {ECO:0000313|EMBL:KNA15196.1};	--	GO:0031966,mitochondrial membrane; GO:0005747,mitochondrial respiratory chain complex I; GO:0005739,mitochondrion; GO:0045271,respiratory chain complex I; GO:0004089,carbonate dehydratase activity; GO:0046872,metal ion binding; GO:0009853,photorespiration; GO:0070207,protein homotrimerization	Ribosomal protein L10
gene-LOC110690369	0.8	1.69	1.74	0.25	0	0	13	27	25	4	0	0	17.136	4.099	0.000408463	0.00686396	up	NW_018744032.1	901175	904152	+	LOC110690369	--	--	--	--	--	--	--	--
gene-LOC110690434	3.41	5.97	2.94	1.63	1.9	1.96	117	201	89	55	63	65	2.331	1.221	0.00128033	0.01758	up	NW_018744041.1	1109461	1112691	-	LOC110690434	--	--	SNF1-related protein kinase regulatory subunit gamma-1-like [Chenopodium quinoa]	RecName: Full=SNF1-related protein kinase regulatory subunit gamma-1-like; AltName: Full=AKIN subunit gamma-1-like; AltName: Full=CBS domain-containing protein CBSCBS2;	SubName: Full=Uncharacterized protein {ECO:0000313|EMBL:KNA25535.1};	5'-AMP-activated protein kinase, gamma subunit	GO:0005975,carbohydrate metabolic process	CBS domain
gene-LOC110690471	4.31	8.07	3.65	2.2	2.41	2.67	102	187	76	51	55	61	2.293	1.197	0.00255404	0.0301297	up	NW_018744041.1	1461394	1464492	+	LOC110690471	--	--	protein NEOXANTHIN-DEFICIENT 1-like [Chenopodium quinoa]	RecName: Full=Protein NEOXANTHIN-DEFICIENT 1 {ECO:0000303|PubMed:24506237};	SubName: Full=Uncharacterized protein {ECO:0000313|EMBL:KNA23743.1};	--	GO:0016123,xanthophyll biosynthetic process	Acetoacetate decarboxylase (ADC)
gene-LOC110690528	8.02	7.44	6.6	3.6	2.65	3.38	305	277	221	134	97	124	2.451	1.293	4.72612e-06	0.000144507	up	NW_018744041.1	2125043	2159585	+	LOC110690528	--	K09264 MADS-box transcription factor, plant | (RefSeq) MADS-box protein FLOWERING LOCUS C-like (A)	agamous-like MADS-box protein AGL27 [Chenopodium quinoa]	RecName: Full=MADS-box transcription factor 6; AltName: Full=OsMADS6; AltName: Full=Protein MOSAIC FLORAL ORGANS 1;	SubName: Full=Uncharacterized protein {ECO:0000313|EMBL:KNA15436.1};	MADS box transcription factor	GO:0005634,nucleus; GO:0003677,DNA binding; GO:0003700,DNA-binding transcription factor activity; GO:0046983,protein dimerization activity; GO:0000977,RNA polymerase II regulatory region sequence-specific DNA binding; GO:0030154,cell differentiation; GO:0009553,embryo sac development; GO:0010582,floral meristem determinacy; GO:0048437,floral organ development; GO:0048449,floral organ formation; G…	SRF-type transcription factor (DNA-binding and dimerisation domain)
gene-LOC110690574	0.34	0.65	0.45	0	0	0	19	35	22	0	0	0	146.033	7.19	1.53619e-07	6.71486e-06	up	NW_018742329.1	4274823	4279567	-	LOC110690574	--	--	--	--	--	--	--	--
gene-LOC110690579	28.08	10.69	16.45	6.18	2.96	10.05	649	242	335	140	66	224	3.359	1.748	0.000518029	0.00841051	up	NW_018744041.1	1861649	1862782	+	LOC110690579	--	K13448 calcium-binding protein CML | (RefSeq) probable calcium-binding protein CML50 (A)	uncharacterized protein LOC110690579 [Chenopodium quinoa]	RecName: Full=BAG family molecular chaperone regulator 5, mitochondrial; AltName: Full=Bcl-2-associated athanogene 5; Flags: Precursor;	SubName: Full=Uncharacterized protein {ECO:0000313|EMBL:KNA24230.1};	--	GO:0005739,mitochondrion; GO:0009506,plasmodesma; GO:0005516,calmodulin binding; GO:0051087,chaperone binding; GO:0006457,protein folding; GO:0043207,response to external biotic stimulus; GO:0009266,response to temperature stimulus	BAG domain
gene-LOC110690590	8.89	10.8	3.62	1.91	2.53	1.04	142	169	51	30	39	16	4.27	2.094	0.000531219	0.00859068	up	NW_018744041.1	1080335	1081214	+	LOC110690590	--	K10406 kinesin family member C2/C3 | (RefSeq) kinesin-4-like isoform X1 (A)	uncharacterized protein LOC110690590 [Chenopodium quinoa]	--	SubName: Full=Uncharacterized protein {ECO:0000313|EMBL:KNA22952.1};	--	--	EB module
gene-LOC110690596	7.1	0.16	0.18	0	0	0	45	1	1	0	0	0	97.777	6.611	0.00210689	0.0259055	up	NW_018744041.1	1877081	1877976	+	LOC110690596	--	--	--	--	--	--	--	--
gene-LOC110690649	1.07	2.04	1.71	0.12	0.12	0.34	71	133	100	8	8	22	8.891	3.152	2.45927e-11	2.08818e-09	up	NW_018744062.1	423259	435256	+	LOC110690649	--	K17604 zinc finger SWIM domain-containing protein 3 | (RefSeq) protein FAR-RED IMPAIRED RESPONSE 1-like isoform X1 (A)	protein FAR-RED IMPAIRED RESPONSE 1-like isoform X1 [Chenopodium quinoa]	RecName: Full=Protein FAR1-RELATED SEQUENCE 5;	SubName: Full=Uncharacterized protein {ECO:0000313|EMBL:KNA10251.1};	--	GO:0005634,nucleus; GO:0008270,zinc ion binding; GO:0006355,regulation of transcription, DNA-templated	MULE transposase domain
gene-LOC110690658	14.05	9.64	14.38	5.73	6.99	6.7	793	533	715	317	380	365	2.075	1.053	0.00128338	0.0176101	up	NW_018744062.1	634627	643962	-	LOC110690658	--	K08867 WNK lysine deficient protein kinase [EC:2.7.11.1] | (RefSeq) probable serine/threonine-protein kinase WNK5 (A)	probable serine/threonine-protein kinase WNK5 [Chenopodium quinoa]	RecName: Full=Probable serine/threonine-protein kinase WNK5; Short=AtWNK5; EC=2.7.11.1; AltName: Full=Protein kinase with no lysine 5;	SubName: Full=Uncharacterized protein {ECO:0000313|EMBL:OAY41621.1};	Serine/threonine protein kinase	GO:0005829,cytosol; GO:0005524,ATP binding; GO:0043424,protein histidine kinase binding; GO:0004672,protein kinase activity; GO:0004674,protein serine/threonine kinase activity; GO:0035556,intracellular signal transduction; GO:0048573,photoperiodism, flowering; GO:0006468,protein phosphorylation	Protein kinase domain
gene-LOC110690668	10.5	8.46	4.1	0	0.12	0	375	296	129	0	4	0	207.561	7.697	3.68223e-17	7.2344e-15	up	NW_018744062.1	858354	860384	+	LOC110690668	--	K17604 zinc finger SWIM domain-containing protein 3 | (RefSeq) uncharacterized protein LOC111409841 (A)	uncharacterized protein LOC110690668 [Chenopodium quinoa]	--	SubName: Full=uncharacterized protein LOC109000249 {ECO:0000313|RefSeq:XP_018832622.1};	--	--	SWIM zinc finger
gene-LOC110690670	58.52	88.52	44.82	1.43	0.83	8.9	879	1302	593	21	12	129	20.786	4.378	3.73023e-11	3.08232e-09	up	NW_018744062.1	896367	897494	+	LOC110690670	--	--	non-specific lipid-transfer protein 1-like [Chenopodium quinoa]	RecName: Full=Non-specific lipid-transfer protein; Short=LTP; AltName: Full=GH3; Flags: Precursor;	RecName: Full=Non-specific lipid-transfer protein {ECO:0000256|RuleBase:RU000628};	--	GO:0008289,lipid binding; GO:0006869,lipid transport; GO:0090378,seed trichome elongation	Protease inhibitor/seed storage/LTP family
gene-LOC110690680	4.5	6.23	5.07	1.24	2.29	2.65	141	191	140	38	69	80	2.71	1.438	6.181e-05	0.0013778	up	NW_018744062.1	990732	992268	+	LOC110690680	--	K19040 E3 ubiquitin-protein ligase ATL10/75/76/77/78 [EC:2.3.2.27] | (RefSeq) RING-H2 finger protein ATL74-like (A)	RING-H2 finger protein ATL74-like [Chenopodium quinoa]	RecName: Full=RING-H2 finger protein ATL74; EC=2.3.2.27 {ECO:0000305}; AltName: Full=RING-type E3 ubiquitin transferase ATL74 {ECO:0000305};	SubName: Full=Uncharacterized protein {ECO:0000313|EMBL:KNA06290.1};	FOG: Predicted E3 ubiquitin ligase	GO:0016021,integral component of membrane; GO:0046872,metal ion binding; GO:0061630,ubiquitin protein ligase activity; GO:0043161,proteasome-mediated ubiquitin-dependent protein catabolic process	Ring finger domain
gene-LOC110690728	8.78	9.05	8.98	3.58	3.38	5.03	313	316	282	125	116	173	2.411	1.27	1.00691e-08	5.49355e-07	up	NW_018744062.1	1648488	1652158	-	LOC110690728	--	K19355 mannan endo-1,4-beta-mannosidase [EC:3.2.1.78] | (RefSeq) mannan endo-1,4-beta-mannosidase 6-like isoform X1 (A)	mannan endo-1,4-beta-mannosidase 6-like isoform X1 [Chenopodium quinoa]	RecName: Full=Mannan endo-1,4-beta-mannosidase 6; EC=3.2.1.78; AltName: Full=Beta-mannanase 6; AltName: Full=Endo-beta-1,4-mannanase 6; Short=AtMAN6; Flags: Precursor;	SubName: Full=Uncharacterized protein {ECO:0000313|EMBL:KNA11219.1};	--	GO:0005576,extracellular region; GO:0016985,mannan endo-1,4-beta-mannosidase activity; GO:0046355,mannan catabolic process; GO:0009845,seed germination	Cellulase (glycosyl hydrolase family 5)
gene-LOC110690807	5.45	6.37	9.13	0.99	1.29	1.39	118	135	174	21	27	29	6.008	2.587	5.43297e-12	5.05471e-10	up	NW_018744062.1	169110	170171	-	LOC110690807	--	--	uncharacterized protein LOC110690807 [Chenopodium quinoa]	--	SubName: Full=Uncharacterized protein {ECO:0000313|EMBL:KNA16582.1};	--	--	--
gene-LOC110690852	7.32	4.99	9.66	3.7	3.27	3.79	232	155	270	115	100	116	2.174	1.121	0.001895	0.0238847	up	NW_018744066.1	301755	304539	+	LOC110690852	--	K22074 NFU1 iron-sulfur cluster scaffold homolog, mitochondrial | (RefSeq) nifU-like protein 1, chloroplastic (A)	nifU-like protein 3, chloroplastic [Chenopodium quinoa]	RecName: Full=NifU-like protein 3, chloroplastic; Short=AtCNfu3; Short=AtCnfU-IVa; Flags: Precursor;	SubName: Full=Uncharacterized protein {ECO:0000313|EMBL:KNA25391.1};	NifU-like domain-containing proteins	GO:0009507,chloroplast; GO:0009570,chloroplast stroma; GO:0005506,iron ion binding; GO:0051536,iron-sulfur cluster binding; GO:0032947,protein-containing complex scaffold activity; GO:0005198,structural molecule activity; GO:0016226,iron-sulfur cluster assembly; GO:0048564,photosystem I assembly	NifU-like domain
gene-LOC110690925	0.58	0.39	0.41	0.11	0.06	0.06	21	14	13	4	2	2	6.52	2.705	0.00178659	0.0227472	up	NW_018744066.1	1255808	1258249	-	LOC110690925	--	K18980 2-methylene-furan-3-one reductase [EC:1.3.1.105] | (RefSeq) LOW QUALITY PROTEIN: 2-methylene-furan-3-one reductase-like (A)	LOW QUALITY PROTEIN: 2-methylene-furan-3-one reductase-like [Chenopodium quinoa]	RecName: Full=2-methylene-furan-3-one reductase; EC=1.3.1.105 {ECO:0000269|PubMed:16517758, ECO:0000269|PubMed:23589283}; AltName: Full=Enone oxidoreductase; Short=FaEO; AltName: Full=Quinone oxidoreductase; Short=FaQR;	SubName: Full=2-methylene-furan-3-one reductase-like {ECO:0000313|RefSeq:XP_018815084.1};	Zinc-binding oxidoreductase	GO:0102978,furaneol oxidoreductase activity; GO:0008270,zinc ion binding	Zinc-binding dehydrogenase
gene-LOC110690932	41.5	33.29	33.89	15.71	12.31	21.49	1711	1344	1231	635	489	855	2.41	1.269	4.38846e-07	1.7448e-05	up	NW_018744066.1	1412035	1418497	+	LOC110690932	--	K00844 hexokinase [EC:2.7.1.1] | (RefSeq) hexokinase-1-like (A)	hexokinase-1-like [Chenopodium quinoa]	RecName: Full=Hexokinase-1; EC=2.7.1.1; AltName: Full=SoHxK1;	RecName: Full=Phosphotransferase {ECO:0000256|RuleBase:RU362007}; EC=2.7.1.- {ECO:0000256|RuleBase:RU362007};	Hexokinase	GO:0009707,chloroplast outer membrane; GO:0016021,integral component of membrane; GO:0005524,ATP binding; GO:0005536,glucose binding; GO:0004396,hexokinase activity; GO:0001678,cellular glucose homeostasis; GO:0006096,glycolytic process	Hexokinase
gene-LOC110690964	3.16	6.37	7.35	0	0	0	179	354	367	0	0	0	1743.73	10.768	5.94297e-18	1.34668e-15	up	NW_018744066.1	1876167	1879212	+	LOC110690964	--	--	uncharacterized protein LOC110690964 [Chenopodium quinoa]	--	SubName: Full=Uncharacterized protein {ECO:0000313|EMBL:KNA09889.1};	--	GO:0005524,ATP binding	--
gene-LOC110690965	12.44	11.42	7.62	0.86	2.39	2.18	367	330	198	25	68	62	6.141	2.618	2.70513e-08	1.36126e-06	up	NW_018744066.1	1928415	1929862	-	LOC110690965	--	K09286 EREBP-like factor | (RefSeq) ethylene-responsive transcription factor TINY-like (A)	ethylene-responsive transcription factor TINY-like [Chenopodium quinoa]	RecName: Full=Ethylene-responsive transcription factor TINY;	SubName: Full=Uncharacterized protein {ECO:0000313|EMBL:KNA13484.1}; Flags: Fragment;	--	GO:0005634,nucleus; GO:0003677,DNA binding; GO:0003700,DNA-binding transcription factor activity; GO:0006351,transcription, DNA-templated	AP2 domain
gene-LOC110690989	2.37	0.55	2.97	0.05	0.03	0	97	22	107	2	1	0	83.046	6.376	1.29284e-08	6.92062e-07	up	NW_018742329.1	6091177	6095294	+	LOC110690989	--	--	--	--	--	--	--	--
gene-LOC110691049	5.39	15.55	5.75	0.66	0.64	1.8	183	517	172	22	21	59	9.384	3.23	2.60809e-10	1.88517e-08	up	NW_018742329.1	6544508	6549431	-	LOC110691049	--	--	--	--	--	--	--	--
gene-LOC110691147	3.34	3.72	4.52	1.97	1.42	2.71	156	170	186	90	64	122	2.058	1.041	0.000127893	0.0025941	up	NW_018744068.1	839420	845623	+	LOC110691147	--	--	--	--	--	--	--	--
gene-LOC110691174	1.3	0	1.51	0.05	0.02	0.02	76	0	78	3	1	1	34.802	5.121	0.000391494	0.00665983	up	NW_018744069.1	362685	365561	+	LOC110691174	--	K00799 glutathione S-transferase [EC:2.5.1.18] | (RefSeq) uncharacterized protein LOC110786294 (A)	uncharacterized protein LOC110691174 isoform X1 [Chenopodium quinoa]	--	SubName: Full=Uncharacterized protein {ECO:0000313|EMBL:CCA66054.1};	FOG: Reverse transcriptase	GO:0003676,nucleic acid binding	Reverse transcriptase-like
gene-LOC110691193	1.24	2.67	1.83	0	0	0	30	63	39	0	0	0	252.833	7.982	1.245e-09	8.05347e-08	up	NW_018744072.1	302126	304229	+	LOC110691193	--	--	--	--	--	--	--	--
gene-LOC110691196	1.42	1.59	2.06	0.81	0.55	0.87	89	98	114	50	33	53	2.429	1.28	9.96552e-05	0.0020914	up	NW_018744072.1	530138	533886	-	LOC110691196	--	--	--	--	--	--	--	--
gene-LOC110691211	15.25	27.65	14.01	6.51	5.84	3.95	588	1044	476	246	217	147	3.514	1.813	7.10219e-06	0.000207701	up	NW_018744072.1	1258846	1260908	+	LOC110691211	--	K12135 zinc finger protein CONSTANS | (RefSeq) zinc finger protein CONSTANS-LIKE 2-like (A)	zinc finger protein CONSTANS-LIKE 16-like [Chenopodium quinoa]	RecName: Full=Zinc finger protein CONSTANS-LIKE 6;	SubName: Full=Uncharacterized protein {ECO:0000313|EMBL:KNA11686.1};	GATA-4/5/6 transcription factors	GO:0005634,nucleus; GO:0003700,DNA-binding transcription factor activity; GO:0008270,zinc ion binding; GO:0006355,regulation of transcription, DNA-templated	CCT motif
gene-LOC110691218	4.29	8.83	3.72	2.4	2.11	3.23	135	272	103	74	64	98	2.301	1.202	0.0018457	0.0233869	up	NW_018744072.1	1506667	1509612	+	LOC110691218	--	--	phosphatidylinositol transfer protein 1-like [Chenopodium quinoa]	--	SubName: Full=Uncharacterized protein {ECO:0000313|EMBL:KMS96396.1};	Phosphatidylinositol transfer protein	GO:0005622,intracellular; GO:0005548,phospholipid transporter activity	Phosphatidylinositol transfer protein
gene-LOC110691225	29.98	26.46	40.07	9.31	7.74	11.46	575	497	677	175	143	212	3.643	1.865	2.70538e-12	2.64355e-10	up	NW_018744072.1	1743439	1744379	+	LOC110691225	--	--	uncharacterized protein LOC110691225 [Chenopodium quinoa]	--	SubName: Full=Uncharacterized protein {ECO:0000313|EMBL:KNA24409.1};	U4/U6-associated splicing factor PRP4	--	--
gene-LOC110691235	0.5	0.93	0.64	0.17	0.21	0.26	46	84	52	15	19	23	3.409	1.769	4.42558e-05	0.00103262	up	NW_018744072.1	1904055	1915555	+	LOC110691235	--	K19476 vacuolar protein sorting-associated protein IST1 | (RefSeq) uncharacterized protein LOC110691235 isoform X1 (A)	uncharacterized protein LOC110691235 isoform X1 [Chenopodium quinoa]	--	SubName: Full=Uncharacterized protein {ECO:0000313|EMBL:KNA10081.1}; Flags: Fragment;	Spindle pole body protein	GO:0015031,protein transport	Regulator of Vps4 activity in the MVB pathway
gene-LOC110691238	1.92	3.08	3.46	0.71	0.69	0.66	72	113	114	26	25	24	4.247	2.086	8.8714e-08	4.04037e-06	up	NW_018744072.1	1921673	1924118	+	LOC110691238	--	--	--	--	--	--	--	--
gene-LOC110691254	0.88	0.63	0.35	0.04	0.08	0.2	23	16	8	1	2	5	6.649	2.733	0.00398488	0.042319	up	NW_018744072.1	2303389	2304870	+	LOC110691254	--	--	--	--	--	--	--	--
gene-LOC110691424	11.51	3.26	5.7	3.29	1.43	2.69	461	128	201	129	55	104	3.118	1.641	0.00352818	0.0388195	up	NW_018744080.1	1356207	1373826	-	LOC110691424	--	K08726 soluble epoxide hydrolase / lipid-phosphate phosphatase [EC:3.3.2.10 3.1.3.76] | (RefSeq) uncharacterized protein LOC105643456 (A)	uncharacterized protein LOC110691424 isoform X1 [Chenopodium quinoa]	--	SubName: Full=Uncharacterized protein {ECO:0000313|EMBL:KNA09071.1};	Soluble epoxide hydrolase	GO:0003824,catalytic activity	alpha/beta hydrolase fold
gene-LOC110691437	6.47	4.52	3.36	1.58	2.58	2.36	247	169	113	59	95	87	2.35	1.233	0.00491658	0.049455	up	NW_018744080.1	1702327	1705347	+	LOC110691437	--	K01184 polygalacturonase [EC:3.2.1.15] | (RefSeq) LOC109764960; polygalacturonase ADPG1-like (A)	polygalacturonase ADPG2-like [Chenopodium quinoa]	RecName: Full=Probable polygalacturonase; Short=PG {ECO:0000250|UniProtKB:Q7M1E7}; EC=3.2.1.15; AltName: Full=Pectinase {ECO:0000250|UniProtKB:Q7M1E7};	SubName: Full=Uncharacterized protein {ECO:0000313|EMBL:KNA07199.1};	--	GO:0016021,integral component of membrane; GO:0004650,polygalacturonase activity; GO:0005975,carbohydrate metabolic process	Glycosyl hydrolases family 28
gene-LOC110691439	2.77	3.18	2.57	0.21	0.12	0.4	121	136	99	9	5	17	12.814	3.68	4.07473e-17	7.79815e-15	up	NW_018744080.1	1718416	1722615	-	LOC110691439	--	K15803 (-)-germacrene D synthase [EC:4.2.3.75] | (RefSeq) sesquiterpene synthase-like (A)	(-)-germacrene D synthase-like [Chenopodium quinoa]	RecName: Full=(-)-germacrene D synthase; EC=4.2.3.22; EC=4.2.3.75;	SubName: Full=Uncharacterized protein {ECO:0000313|EMBL:CBI31300.3};	--	GO:0005737,cytoplasm; GO:0034004,germacradienol synthase activity; GO:0052577,germacrene-D synthase activity; GO:0000287,magnesium ion binding; GO:0016114,terpenoid biosynthetic process	Terpene synthase family, metal binding domain
gene-LOC110691441	5.6	6.74	7.11	1.5	1.1	4.99	432	509	483	113	82	371	2.974	1.573	0.000485031	0.00794814	up	NW_018744080.1	1759026	1765085	+	LOC110691441	--	--	uncharacterized protein LOC110691441 isoform X1 [Chenopodium quinoa]	--	SubName: Full=Uncharacterized protein {ECO:0000313|EMBL:KNA10864.1};	--	--	DIL domain
gene-LOC110691454	47.72	67.2	54.26	21.79	24.12	44.27	3249	4481	3255	1455	1582	2908	2.042	1.03	2.41151e-05	0.000609663	up	NW_018744080.1	2007913	2014714	+	LOC110691454	--	K13947 auxin efflux carrier family | (RefSeq) auxin efflux carrier component 3-like isoform X1 (A)	auxin efflux carrier component 3-like isoform X1 [Chenopodium quinoa]	RecName: Full=Auxin efflux carrier component 3 {ECO:0000303|PubMed:11845211}; Short=AtPIN3 {ECO:0000303|PubMed:11845211};	RecName: Full=Auxin efflux carrier component {ECO:0000256|RuleBase:RU362108};	--	GO:0009986,cell surface; GO:0005783,endoplasmic reticulum; GO:0016021,integral component of membrane; GO:0016328,lateral plasma membrane; GO:0005886,plasma membrane; GO:0012506,vesicle membrane; GO:0010329,auxin efflux transmembrane transporter activity; GO:0010315,auxin efflux; GO:0010252,auxin homeostasis; GO:0009926,auxin polar transport; GO:0009734,auxin-activated signaling pathway; GO:000963…	Membrane transport protein
gene-LOC110691455	0.8	1.73	1.9	0.38	0.54	0.83	32	68	67	15	21	32	2.675	1.42	0.00365754	0.0398041	up	NW_018744080.1	2151964	2153930	+	LOC110691455	--	K10251 17beta-estradiol 17-dehydrogenase / very-long-chain 3-oxoacyl-CoA reductase [EC:1.1.1.62 1.1.1.330] | (RefSeq) uncharacterized protein LOC111404819 (A)	zinc finger MYM-type protein 1-like [Chenopodium quinoa]	--	SubName: Full=HAT family dimerization domain protein {ECO:0000313|EMBL:ACX94087.1};	--	GO:0046983,protein dimerization activity	Domain of unknown function (DUF4371)
gene-LOC110691490	1.61	1.93	2.4	0	0	0	35	41	46	0	0	0	238.819	7.9	1.27585e-09	8.20986e-08	up	NW_018744080.1	2924644	2927443	+	LOC110691490	--	K11649 SWI/SNF related-matrix-associated actin-dependent regulator of chromatin subfamily C | (RefSeq) CHB3501; predicted protein (A)	uncharacterized protein LOC110691490 [Chenopodium quinoa]	--	SubName: Full=Uncharacterized protein {ECO:0000313|EMBL:KNA20607.1};	--	GO:0015035,protein disulfide oxidoreductase activity	DSBA-like thioredoxin domain
gene-LOC110691510	31.67	40.04	35.52	7.05	7.87	7.04	1333	1650	1317	291	319	286	5.057	2.338	8.57456e-20	2.49378e-17	up	NW_018744080.1	3230790	3232854	-	LOC110691510	--	--	uncharacterized protein LOC110691510 [Chenopodium quinoa]	--	SubName: Full=Uncharacterized protein {ECO:0000313|EMBL:KNA23380.1};	--	--	--
gene-LOC110691518	3.87	3.54	5.49	1.56	1.18	2.49	116	104	145	46	34	72	2.702	1.434	4.95761e-05	0.00113383	up	NW_018742329.1	7505905	7509480	-	LOC110691518	--	--	--	--	--	--	--	--
gene-LOC110691532	10.54	13.52	16.13	5.65	3.8	12.06	866	1088	1168	455	301	956	2.1	1.07	0.00170014	0.0218652	up	NW_018742329.1	7530608	7535560	-	LOC110691532	--	K12811 ATP-dependent RNA helicase DDX46/PRP5 [EC:3.6.4.13] | (RefSeq) uncharacterized protein LOC106427234 (A)	WEB family protein At5g16730, chloroplastic-like [Chenopodium quinoa]	RecName: Full=WEB family protein At5g16730, chloroplastic; Flags: Precursor;	SubName: Full=Uncharacterized protein {ECO:0000313|EMBL:KNA19265.1};	--	GO:0009507,chloroplast; GO:0005875,microtubule associated complex; GO:0000795,synaptonemal complex; GO:0007131,reciprocal meiotic recombination	Weak chloroplast movement under blue light
gene-LOC110691544	14.96	7.5	2.52	0.57	0.49	0.71	479	235	71	18	15	22	15.81	3.983	1.10525e-09	7.19992e-08	up	NW_018744080.1	3810930	3812500	+	LOC110691544	--	K13495 cis-zeatin O-glucosyltransferase [EC:2.4.1.215] | (RefSeq) zeatin O-glucosyltransferase-like (A)	zeatin O-glucosyltransferase-like [Chenopodium quinoa]	RecName: Full=Zeatin O-glucosyltransferase; EC=2.4.1.203; AltName: Full=Trans-zeatin O-beta-D-glucosyltransferase;	RecName: Full=Glycosyltransferase {ECO:0000256|RuleBase:RU362057}; EC=2.4.1.- {ECO:0000256|RuleBase:RU362057};	UDP-glucuronosyl and UDP-glucosyl transferase	GO:0050403,trans-zeatin O-beta-D-glucosyltransferase activity; GO:0050404,zeatin O-beta-D-xylosyltransferase activity; GO:0009690,cytokinin metabolic process; GO:0048439,flower morphogenesis; GO:0009965,leaf morphogenesis; GO:0045926,negative regulation of growth; GO:0006486,protein glycosylation; GO:0010380,regulation of chlorophyll biosynthetic process; GO:0010083,regulation of vegetative meris…	UDP-glucoronosyl and UDP-glucosyl transferase
gene-LOC110691585	34.43	35.04	30.3	0.06	0.06	0.03	1197	1193	928	2	2	1	721.625	9.495	1.90378e-42	5.02271e-39	up	NW_018744080.1	4724522	4766508	-	LOC110691585	--	K00939 adenylate kinase [EC:2.7.4.3] | (RefSeq) hypothetical protein (A)	uncharacterized protein LOC110691585 isoform X1 [Chenopodium quinoa]	--	SubName: Full=Uncharacterized protein {ECO:0000313|EMBL:EXC25279.1};	--	GO:0016021,integral component of membrane	Protein of unknown function (DUF3054)
gene-LOC110691676	0.22	0.28	0.12	0.02	0	0.02	12	15	6	1	0	1	18.107	4.178	0.00229417	0.0276615	up	NW_018744092.1	115368	120417	+	LOC110691676	--	--	--	--	--	--	--	--
gene-LOC110691735	6.3	3.29	4.53	1.29	1.66	2.47	264	135	167	53	67	100	2.884	1.528	0.000226952	0.00423582	up	NW_018744092.1	496911	502825	-	LOC110691735	--	K16298 serine carboxypeptidase-like clade IV [EC:3.4.16.-] | (RefSeq) serine carboxypeptidase-like isoform X1 (A)	serine carboxypeptidase-like isoform X1 [Chenopodium quinoa]	RecName: Full=Serine carboxypeptidase-like 48; EC=3.4.16.-; Flags: Precursor;	RecName: Full=Carboxypeptidase {ECO:0000256|RuleBase:RU361156}; EC=3.4.16.- {ECO:0000256|RuleBase:RU361156};	Serine carboxypeptidases (lysosomal cathepsin A)	GO:0005576,extracellular region; GO:0005773,vacuole; GO:0004185,serine-type carboxypeptidase activity; GO:0051603,proteolysis involved in cellular protein catabolic process	Serine carboxypeptidase
gene-LOC110691748	0.42	0.76	0.33	0.02	0.02	0.02	22	39	15	1	1	1	26.883	4.749	8.14476e-06	0.00023466	up	NW_018744092.1	835903	843122	-	LOC110691748	--	--	uncharacterized protein LOC110691748 [Chenopodium quinoa]	--	SubName: Full=Uncharacterized protein {ECO:0000313|EMBL:AFK44328.1};	--	--	--
gene-LOC110691775	77.92	56.67	49.46	0.79	1.16	0.76	11015	7845	6159	110	158	103	70.639	6.142	8.95622e-54	4.72582e-50	up	NW_018744092.1	1352206	1361510	+	LOC110691775	--	K18757 la-related protein 1 | (RefSeq) la-related protein 1A-like (A)	zinc finger MYM-type protein 1-like isoform X1 [Chenopodium quinoa]	--	SubName: Full=Putative transposase {ECO:0000313|EMBL:AAL86479.1};	--	GO:0005737,cytoplasm; GO:0005654,nucleoplasm; GO:0003677,DNA binding; GO:0046983,protein dimerization activity; GO:0000981,DNA-binding transcription factor activity, RNA polymerase II-specific	Domain of unknown function (DUF4371)
gene-LOC110691801	1.66	5.07	2.8	0.83	1.39	1.54	57	171	85	28	46	51	2.614	1.386	0.00407666	0.0429825	up	NW_018744092.1	1810096	1812366	-	LOC110691801	--	--	fasciclin-like arabinogalactan protein 2 [Chenopodium quinoa]	RecName: Full=Fasciclin-like arabinogalactan protein 2; Flags: Precursor;	SubName: Full=Uncharacterized protein {ECO:0000313|EMBL:KNA19187.1};	--	GO:0031225,anchored component of membrane; GO:0046658,anchored component of plasma membrane; GO:0016020,membrane; GO:0005886,plasma membrane; GO:0005774,vacuolar membrane	Fasciclin domain
gene-LOC110691815	10.94	7.62	10.42	3.27	2.28	5.5	542	370	455	159	109	263	2.943	1.557	2.52378e-06	8.26403e-05	up	NW_018744092.1	2077203	2084856	+	LOC110691815	--	--	--	--	--	--	--	--
gene-LOC110691848	42.24	38.59	36.23	14.64	14.26	11.65	1150	1029	869	391	374	306	3.004	1.587	3.397e-07	1.37428e-05	up	NW_018744092.1	2695795	2700713	+	LOC110691848	--	--	probable plastid-lipid-associated protein 4, chloroplastic [Chenopodium quinoa]	RecName: Full=Probable plastid-lipid-associated protein 4, chloroplastic; AltName: Full=Fibrillin-3a; AltName: Full=Plastoglobulin 25; Short=AtPGL25; Flags: Precursor;	SubName: Full=Uncharacterized protein {ECO:0000313|EMBL:KNA16791.1};	--	GO:0009507,chloroplast; GO:0009534,chloroplast thylakoid; GO:0009535,chloroplast thylakoid membrane; GO:0010287,plastoglobule	PAP_fibrillin
gene-LOC110691946	61.7	48.71	58.06	6.27	7.09	10.76	1807	1397	1498	180	200	304	7.627	2.931	1.13178e-27	7.7414e-25	up	NW_018744092.1	4214487	4217721	-	LOC110691946	--	K05275 pyridoxine 4-dehydrogenase [EC:1.1.1.65] | (RefSeq) pyridoxal reductase, chloroplastic (A)	uncharacterized oxidoreductase At1g06690, chloroplastic-like [Chenopodium quinoa]	RecName: Full=Uncharacterized oxidoreductase At1g06690, chloroplastic; EC=1.-.-.-; Flags: Precursor;	SubName: Full=Uncharacterized protein {ECO:0000313|EMBL:KNA25596.1};	Voltage-gated shaker-like K+ channel, subunit beta/KCNAB	GO:0009507,chloroplast; GO:0009941,chloroplast envelope; GO:0009535,chloroplast thylakoid membrane; GO:0010287,plastoglobule; GO:0016491,oxidoreductase activity	Aldo/keto reductase family
gene-LOC110691952	193.93	626.69	129.11	115.99	50.49	153.54	8130	25727	4768	4768	2039	6210	3.193	1.675	0.00246567	0.0293103	up	NW_018744092.1	4282481	4286618	-	LOC110691952	--	K01177 beta-amylase [EC:3.2.1.2] | (RefSeq) beta-amylase-like (A)	beta-amylase-like [Chenopodium quinoa]	RecName: Full=Beta-amylase; EC=3.2.1.2; AltName: Full=1,4-alpha-D-glucan maltohydrolase;	RecName: Full=Beta-amylase {ECO:0000256|RuleBase:RU000509}; EC=3.2.1.2 {ECO:0000256|RuleBase:RU000509};	--	GO:0102229,amylopectin maltohydrolase activity; GO:0016161,beta-amylase activity; GO:0000272,polysaccharide catabolic process	Glycosyl hydrolase family 14
gene-LOC110691963	0.47	0.62	0.13	0	0	0	17	22	4	0	0	0	82.187	6.361	8.9064e-05	0.00189935	up	NW_018744092.1	4444480	4452773	-	LOC110691963	--	--	--	--	--	--	--	--
gene-LOC110692010	2.94	13.38	1.5	0.78	1.07	0.37	100	446	45	26	35	12	7.621	2.93	0.000239225	0.00442685	up	NW_018744092.1	5349816	5357038	-	LOC110692010	--	--	photosystem II stability/assembly factor HCF136, chloroplastic-like [Chenopodium quinoa]	RecName: Full=Photosystem II stability/assembly factor HCF136, chloroplastic; Flags: Precursor;	SubName: Full=Uncharacterized protein {ECO:0000313|EMBL:KNA22712.1};	Sortilin and related receptors	GO:0009507,chloroplast; GO:0009941,chloroplast envelope; GO:0009570,chloroplast stroma; GO:0009533,chloroplast stromal thylakoid; GO:0009534,chloroplast thylakoid; GO:0009535,chloroplast thylakoid membrane; GO:0009523,photosystem II; GO:0009579,thylakoid; GO:0031977,thylakoid lumen; GO:0015979,photosynthesis; GO:0009657,plastid organization; GO:0006461,NA; GO:0046686,response to cadmium ion; GO:0…	Photosynthesis system II assembly factor YCF48
gene-LOC110692141	14.37	14.88	11.64	0.08	0.08	0.08	370	375	264	2	2	2	182.954	7.515	8.00125e-30	7.03653e-27	up	NW_018744093.1	2766864	2768514	+	LOC110692141	--	--	--	--	--	--	--	--
gene-LOC110692171	2.25	3.17	1.86	0	0	0	89	123	65	0	0	0	534.046	9.061	6.26761e-13	6.8899e-11	up	NW_018744093.1	3958496	3961445	+	LOC110692171	--	--	--	--	--	--	--	--
gene-LOC110692178	0.78	1.66	1.16	0	0	0	13	27	17	0	0	0	109.27	6.772	2.1489e-06	7.16352e-05	up	NW_018744093.1	4205534	4207833	-	LOC110692178	--	--	--	--	--	--	--	--
gene-LOC110692242	0.14	0.44	4.75	0	0	0	1	3	29	0	0	0	66.697	6.06	0.00309514	0.0350044	up	NW_018744100.1	29053	30192	+	LOC110692242	--	--	--	--	--	--	--	--
gene-LOC110692258	27.39	22.93	14.37	10.13	11.59	9.62	422	346	195	153	172	143	2.171	1.118	0.00466427	0.0475516	up	NW_018742329.1	7566206	7566961	-	LOC110692258	--	--	uncharacterized protein LOC110692258 [Chenopodium quinoa]	--	SubName: Full=Uncharacterized protein {ECO:0000313|EMBL:KNA16359.1};	--	--	Protein of unknown function (DUF1685)
gene-LOC110692264	7.06	7.75	10.61	3.85	3.67	5.42	417	448	552	223	209	309	2.102	1.072	1.14603e-05	0.000316682	up	NW_018744100.1	477268	483596	-	LOC110692264	--	K12115 clock-associated PAS protein ZTL | (RefSeq) adagio protein 1-like (A)	adagio protein 1-like [Chenopodium quinoa]	RecName: Full=Adagio protein 1; AltName: Full=Clock-associated PAS protein ZTL; AltName: Full=F-box only protein 2b; Short=FBX2b; AltName: Full=Flavin-binding kelch repeat F-box protein 1-like protein 2; Short=FKF1-like protein 2; AltName: Full=LOV kelch protein 1; AltName: Full=Protein ZEITLUPE;	SubName: Full=Putative LOV domain-containing protein {ECO:0000313|EMBL:AML78118.1};	--	GO:0005737,cytoplasm; GO:0005634,nucleus; GO:0009881,photoreceptor activity; GO:0009908,flower development; GO:0016567,protein ubiquitination; GO:0018298,protein-chromophore linkage; GO:0048511,rhythmic process	Galactose oxidase, central domain
gene-LOC110692269	0.51	0.41	0.6	0.06	0.09	0.16	37	29	38	4	6	11	5.55	2.473	3.72855e-05	0.000886786	up	NW_018744100.1	506078	514181	-	LOC110692269	--	K01535 H+-transporting ATPase [EC:7.1.2.1] | (RefSeq) plasma membrane ATPase 4-like isoform X1 (A)	plasma membrane ATPase 4-like isoform X1 [Chenopodium quinoa]	RecName: Full=Plasma membrane ATPase 4; EC=3.6.3.6; AltName: Full=Proton pump 4;	RecName: Full=Plasma membrane ATPase {ECO:0000256|RuleBase:RU362083}; EC=3.6.3.6 {ECO:0000256|RuleBase:RU362083}; Flags: Fragment;	Plasma membrane H+-transporting ATPase	GO:0016021,integral component of membrane; GO:0005886,plasma membrane; GO:0005524,ATP binding; GO:0008553,proton-exporting ATPase activity, phosphorylative mechanism; GO:0046872,metal ion binding; GO:0006754,ATP biosynthetic process	E1-E2 ATPase
gene-LOC110692294	1.83	2.53	2.45	0.07	0.11	0.45	85	115	100	3	5	20	12.314	3.622	2.17675e-10	1.59208e-08	up	NW_018744100.1	770641	774481	-	LOC110692294	--	K00010 myo-inositol 2-dehydrogenase / D-chiro-inositol 1-dehydrogenase [EC:1.1.1.18 1.1.1.369] | (RefSeq) probable inositol 2-dehydrogenase (A)	uncharacterized oxidoreductase At4g09670-like [Chenopodium quinoa]	RecName: Full=Uncharacterized oxidoreductase At4g09670; EC=1.-.-.-;	SubName: Full=Uncharacterized protein {ECO:0000313|EMBL:EMJ17954.1}; Flags: Fragment;	Dimeric dihydrodiol dehydrogenase	GO:0005829,cytosol; GO:0016491,oxidoreductase activity	Oxidoreductase family, NAD-binding Rossmann fold
gene-LOC110692315	0.63	1.15	0.96	0.22	0.18	0.6	29	52	39	10	8	27	3.009	1.589	0.00371849	0.0403018	up	NW_018744100.1	1096103	1101110	+	LOC110692315	--	--	--	--	--	--	--	--
gene-LOC110692415	0.53	0.27	0.24	0	0	0	10	5	4	0	0	0	37.745	5.238	0.00403763	0.042744	up	NW_018744111.1	680996	684576	-	LOC110692415	--	--	--	--	--	--	--	--
gene-LOC110692464	0.69	0.74	1.22	0.07	0.13	0.38	32	34	50	3	6	17	5.14	2.362	0.000370235	0.00636047	up	NW_018744113.1	474856	478673	-	LOC110692464	--	--	--	--	--	--	--	--
gene-LOC110692483	0.87	1.34	1.67	0.55	0.5	0.89	60	90	101	37	33	59	2.146	1.102	0.00267297	0.0312236	up	NW_018744113.1	1533399	1543579	-	LOC110692483	--	--	--	--	--	--	--	--
gene-LOC110692498	1.02	1.75	0.99	0.29	0.37	0.48	40	67	34	11	14	18	3.508	1.811	0.000195087	0.00372581	up	NW_018744113.1	2771687	2795077	-	LOC110692498	--	K07052 uncharacterized protein | (RefSeq) uncharacterized protein LOC110692498 (A)	uncharacterized protein LOC110692498 [Chenopodium quinoa]	--	--	--	--	CPBP intramembrane metalloprotease
gene-LOC110692653	2.99	2.1	3.17	0.82	0.99	0.39	119	82	111	32	38	15	3.803	1.927	0.000346216	0.00602063	up	NW_018744128.1	20198	22150	+	LOC110692653	--	K15405 midchain alkane hydroxylase | (RefSeq) alkane hydroxylase MAH1 (A)	alkane hydroxylase MAH1-like [Chenopodium quinoa]	RecName: Full=Alkane hydroxylase MAH1 {ECO:0000303|PubMed:17905869}; EC=1.14.-.- {ECO:0000305|PubMed:17905869}; AltName: Full=Cytochrome P450 96A15 {ECO:0000305}; AltName: Full=Protein MID-CHAIN ALKANE HYDROXYLASE 1 {ECO:0000303|PubMed:17905869};	SubName: Full=Uncharacterized protein {ECO:0000313|EMBL:KNA09819.1};	Cytochrome P450 CYP4/CYP19/CYP26 subfamilies	GO:0005783,endoplasmic reticulum; GO:0005789,endoplasmic reticulum membrane; GO:0016021,integral component of membrane; GO:0020037,heme binding; GO:0005506,iron ion binding; GO:0080133,midchain alkane hydroxylase activity; GO:0010025,wax biosynthetic process	Cytochrome P450
gene-LOC110692684	1.42	0.37	0.82	0.25	0.09	0.21	63	16	32	11	4	9	5.277	2.4	0.0015118	0.0200359	up	NW_018744128.1	448512	450688	-	LOC110692684	--	K10664 E3 ubiquitin-protein ligase ATL6/9/15/31/42/55 [EC:2.3.2.27] | (RefSeq) E3 ubiquitin-protein ligase ATL6-like (A)	E3 ubiquitin-protein ligase ATL6-like [Chenopodium quinoa]	RecName: Full=E3 ubiquitin-protein ligase ATL6; EC=2.3.2.27 {ECO:0000269|PubMed:15644464}; AltName: Full=RING-H2 finger protein ATL6; AltName: Full=RING-type E3 ubiquitin transferase ATL6 {ECO:0000305}; Flags: Precursor;	SubName: Full=Uncharacterized protein {ECO:0000313|EMBL:KNA21052.1};	FOG: Predicted E3 ubiquitin ligase	GO:0016021,integral component of membrane; GO:0005886,plasma membrane; GO:0046872,metal ion binding; GO:0061630,ubiquitin protein ligase activity; GO:0004842,ubiquitin-protein transferase activity; GO:0009816,defense response to bacterium, incompatible interaction; GO:0009814,defense response, incompatible interaction; GO:0043161,proteasome-mediated ubiquitin-dependent protein catabolic process; …	Ring finger domain
gene-LOC110692715	0.07	0.05	0.13	0	0	0	11	8	18	0	0	0	73.693	6.203	7.38259e-05	0.0016078	up	NW_018744128.1	819850	852854	+	LOC110692715	--	K09489 heat shock 70kDa protein 4 | (RefSeq) heat shock 70 kDa protein 14-like (A)	uncharacterized protein LOC110692715 [Chenopodium quinoa]	--	SubName: Full=Uncharacterized protein {ECO:0000313|EMBL:KNA23964.1};	Vacuolar protein sorting-associated protein	GO:0016021,integral component of membrane	SHR-binding domain of vacuolar-sorting associated protein 13
gene-LOC110692724	13.29	10.94	13.58	3.62	4.78	10.44	644	519	580	172	223	488	2.258	1.175	0.00113591	0.0159467	up	NW_018744128.1	957169	959787	+	LOC110692724	--	K03063 26S proteasome regulatory subunit T3 | (RefSeq) 26S protease regulatory subunit 6B homolog (A)	BTB/POZ domain-containing protein At5g66560-like [Chenopodium quinoa]	RecName: Full=BTB/POZ domain-containing protein At5g66560;	SubName: Full=Uncharacterized protein {ECO:0000313|EMBL:KNA23958.1}; Flags: Fragment;	--	GO:0005886,plasma membrane; GO:0016567,protein ubiquitination	NPH3 family
gene-LOC110692729	47.01	22.92	32.29	8.62	11.09	5.09	823	393	498	148	187	86	4.24	2.084	3.9863e-05	0.00093842	up	NW_018744128.1	1020147	1021005	+	LOC110692729	--	--	uncharacterized protein LOC110692729 [Chenopodium quinoa]	--	SubName: Full=Uncharacterized protein {ECO:0000313|EMBL:KNA09505.1};	--	--	Domain of unknown function (DUF4228)
gene-LOC110692749	4.47	13.7	9.26	4.66	3	5.07	96	288	175	98	62	105	2.252	1.171	0.00410663	0.0431898	up	NW_018744128.1	1330884	1331936	-	LOC110692749	--	K16281 RING-H2 zinc finger protein RHA1 | (RefSeq) E3 ubiquitin-protein ligase RHA1B-like (A)	E3 ubiquitin-protein ligase RHA1B-like [Chenopodium quinoa]	RecName: Full=E3 ubiquitin-protein ligase RHA1B {ECO:0000305}; EC=2.3.2.27; AltName: Full=RING-H2 finger A1b {ECO:0000303|PubMed:9781696}; AltName: Full=RING-H2 zinc finger protein RHA1b {ECO:0000305}; AltName: Full=RING-type E3 ubiquitin transferase RHA1B {ECO:0000305};	SubName: Full=Uncharacterized protein {ECO:0000313|EMBL:KNA13391.1};	FOG: Predicted E3 ubiquitin ligase	GO:0046872,metal ion binding; GO:0061630,ubiquitin protein ligase activity; GO:0004842,ubiquitin-protein transferase activity; GO:0043161,proteasome-mediated ubiquitin-dependent protein catabolic process; GO:0016567,protein ubiquitination; GO:0046686,response to cadmium ion; GO:0010200,response to chitin	Ring finger domain
gene-LOC110692751	8.98	12.75	12.88	4.3	5.17	5.76	530	737	670	249	294	328	2.378	1.25	2.42638e-07	1.01038e-05	up	NW_018744128.1	1409427	1413166	+	LOC110692751	--	--	BTB/POZ domain-containing protein At1g63850-like [Chenopodium quinoa]	RecName: Full=BTB/POZ domain-containing protein At1g63850;	SubName: Full=Uncharacterized protein {ECO:0000313|EMBL:KNA23186.1};	--	GO:0016567,protein ubiquitination	--
gene-LOC110692761	1.33	1.28	2.6	0.36	0.76	0.55	82	77	141	22	45	33	3.191	1.674	0.0009898	0.0142476	up	NW_018744128.1	1591884	1594999	+	LOC110692761	--	--	--	--	--	--	--	--
gene-LOC110692796	0.53	0.71	0.71	0	0	0	16	21	19	0	0	0	109.011	6.768	1.49993e-06	5.22161e-05	up	NW_018744128.1	1865775	1869954	+	LOC110692796	--	--	--	--	--	--	--	--
gene-LOC110692960	0.35	0	0.3	0	0	0	23	0	17	0	0	0	82.842	6.372	0.0031574	0.0355229	up	NW_018744137.1	645461	655839	-	LOC110692960	--	--	--	--	--	--	--	--
gene-LOC110692962	16.65	24.13	9.56	7.21	6.26	12.5	900	1277	455	382	326	652	2.119	1.084	0.00358021	0.0392034	up	NW_018744137.1	573638	580990	+	LOC110692962	--	--	membrane protein of ER body-like protein [Chenopodium quinoa]	RecName: Full=Membrane protein of ER body 1;	SubName: Full=Uncharacterized protein {ECO:0000313|EMBL:KNA22736.1};	--	GO:0005783,endoplasmic reticulum; GO:0005789,endoplasmic reticulum membrane; GO:0010168,ER body; GO:0016021,integral component of membrane; GO:0016020,membrane; GO:0005381,iron ion transmembrane transporter activity; GO:0005384,manganese ion transmembrane transporter activity; GO:0030026,cellular manganese ion homeostasis; GO:0071281,cellular response to iron ion; GO:0006880,intracellular sequest…	--
gene-LOC110692996	0.33	0.14	0.45	0	0	0	14	6	17	0	0	0	74.386	6.217	9.73578e-05	0.00204667	up	NW_018744137.1	1024279	1029022	+	LOC110692996	--	K12930 anthocyanidin 3-O-glucosyltransferase [EC:2.4.1.115] | (RefSeq) anthocyanidin 3-O-glucosyltransferase 7-like (A)	anthocyanidin 3-O-glucosyltransferase 7-like [Chenopodium quinoa]	RecName: Full=UDP-glycosyltransferase 78D2; EC=2.4.1.-; AltName: Full=Anthocyanin 3-O-glucosyltransferase; AltName: Full=Flavonol 3-O-glucosyltransferase; EC=2.4.1.91; AltName: Full=UDP glucose:flavonoid 3-O-glucosyltransferase;	SubName: Full=UDP-glucose:flavonoid 3-O-glucosyltransferase {ECO:0000313|EMBL:AMQ23635.1};	UDP-glucuronosyl and UDP-glucosyl transferase	GO:0043231,intracellular membrane-bounded organelle; GO:0047213,anthocyanidin 3-O-glucosyltransferase activity; GO:0102360,daphnetin 3-O-glucosyltransferase activity; GO:0047893,flavonol 3-O-glucosyltransferase activity; GO:0102425,myricetin 3-O-glucosyltransferase activity; GO:0080043,quercetin 3-O-glucosyltransferase activity; GO:0080044,quercetin 7-O-glucosyltransferase activity; GO:0035251,UD…	UDP-glucoronosyl and UDP-glucosyl transferase
gene-LOC110693031	6.86	2.86	1.36	0.17	0	0	120	49	21	3	0	0	69.285	6.114	3.11534e-07	1.2757e-05	up	NW_018742334.1	1171595	1172826	+	LOC110693031	--	--	jasmonate-induced protein homolog [Chenopodium quinoa]	RecName: Full=Jasmonate-induced protein homolog;	SubName: Full=Uncharacterized protein {ECO:0000313|EMBL:KNA17196.1};	--	--	--
gene-LOC110693046	12.81	3.84	1.79	0.06	0	0	235	69	29	1	0	0	344.43	8.428	5.47612e-09	3.15547e-07	up	NW_018742334.1	1176143	1177343	+	LOC110693046	--	--	jasmonate-induced protein homolog [Chenopodium quinoa]	RecName: Full=Jasmonate-induced protein homolog;	SubName: Full=Uncharacterized protein {ECO:0000313|EMBL:KNA05789.1};	--	--	--
gene-LOC110693060	43.05	11.29	31.45	8.15	11.06	6.12	1487	382	957	276	368	204	3.552	1.829	0.00137987	0.0186623	up	NW_018744137.1	1600991	1603509	+	LOC110693060	--	K13229 2,4-dihydroxy-1,4-benzoxazin-3-one-glucoside dioxygenase [EC:1.14.11.59] | (RefSeq) DIBOA-glucoside dioxygenase BX6 (A)	1-aminocyclopropane-1-carboxylate oxidase homolog 1-like [Chenopodium quinoa]	RecName: Full=Deacetoxyvindoline 4-hydroxylase {ECO:0000303|PubMed:9290645}; EC=1.14.11.20 {ECO:0000269|PubMed:8449913, ECO:0000269|PubMed:9290645};	SubName: Full=Uncharacterized protein {ECO:0000313|EMBL:KNA12365.1};	Iron/ascorbate family oxidoreductases	GO:0005737,cytoplasm; GO:0005634,nucleus; GO:0050590,desacetoxyvindoline 4-hydroxylase activity; GO:0031418,L-ascorbic acid binding; GO:0046872,metal ion binding; GO:0009820,alkaloid metabolic process	2OG-Fe(II) oxygenase superfamily
gene-LOC110693061	17.6	16.19	12.02	4.74	6.05	7.85	595	536	358	157	197	256	2.655	1.409	4.53801e-06	0.000139447	up	NW_018744137.1	1608866	1610754	+	LOC110693061	--	K13229 2,4-dihydroxy-1,4-benzoxazin-3-one-glucoside dioxygenase [EC:1.14.11.59] | (RefSeq) DIBOA-glucoside dioxygenase BX6 (A)	1-aminocyclopropane-1-carboxylate oxidase homolog 1-like [Chenopodium quinoa]	RecName: Full=Deacetoxyvindoline 4-hydroxylase {ECO:0000303|PubMed:9290645}; EC=1.14.11.20 {ECO:0000269|PubMed:8449913, ECO:0000269|PubMed:9290645};	SubName: Full=Uncharacterized protein {ECO:0000313|EMBL:KNA12364.1}; Flags: Fragment;	Iron/ascorbate family oxidoreductases	GO:0005737,cytoplasm; GO:0005634,nucleus; GO:0050590,desacetoxyvindoline 4-hydroxylase activity; GO:0031418,L-ascorbic acid binding; GO:0046872,metal ion binding; GO:0009820,alkaloid metabolic process	2OG-Fe(II) oxygenase superfamily
gene-LOC110693093	0.48	0.02	0.38	0	0.02	0	29	1	20	0	1	0	52.969	5.727	0.00108046	0.0152962	up	NW_018744137.1	642196	645499	-	LOC110693093	--	K13457 disease resistance protein RPM1 | (RefSeq) disease resistance protein RPM1-like (A)	probable disease resistance protein RXW24L [Chenopodium quinoa]	RecName: Full=Disease resistance RPP8-like protein 3;	SubName: Full=Uncharacterized protein {ECO:0000313|EMBL:KNA24581.1};	Apoptotic ATPase	GO:0005886,plasma membrane; GO:0043531,ADP binding; GO:0005524,ATP binding; GO:0006952,defense response; GO:0007165,signal transduction	NB-ARC domain
gene-LOC110693149	13.9	0.04	5.05	0.02	0	0	719	2	230	1	0	0	1016.19	9.989	3.15517e-05	0.000765699	up	NW_018744143.1	271142	291551	-	LOC110693149	--	K15803 (-)-germacrene D synthase [EC:4.2.3.75] | (RefSeq) (-)-germacrene D synthase-like isoform X1 (A)	(-)-germacrene D synthase-like isoform X1 [Chenopodium quinoa]	RecName: Full=Sesquiterpene synthase; Short=SauSesquiTPS; EC=4.2.3.-;	SubName: Full=Germacrene A synthase {ECO:0000313|EMBL:ADR66821.1};	--	GO:0000287,magnesium ion binding; GO:0010333,terpene synthase activity; GO:0008152,metabolic process	Terpene synthase family, metal binding domain
gene-LOC110693174	3.77	1.6	3.8	0.63	0.33	1.72	152	63	135	25	13	67	4.033	2.012	0.000772889	0.0116758	up	NW_018744143.1	873121	878291	+	LOC110693174	--	K15803 (-)-germacrene D synthase [EC:4.2.3.75] | (RefSeq) probable sesquiterpene synthase (A)	probable sesquiterpene synthase [Chenopodium quinoa]	RecName: Full=Probable sesquiterpene synthase; Short=SmSTPS; EC=4.2.3.-;	SubName: Full=Uncharacterized protein {ECO:0000313|EMBL:KNA15781.1};	--	GO:0000287,magnesium ion binding; GO:0010333,terpene synthase activity; GO:0008152,metabolic process	Terpene synthase family, metal binding domain
gene-LOC110693176	0.69	4.81	2.65	0.18	0.03	0.56	27	184	91	7	1	21	11.983	3.583	2.70552e-05	0.000673043	up	NW_018744143.1	898340	901706	+	LOC110693176	--	K15803 (-)-germacrene D synthase [EC:4.2.3.75] | (RefSeq) probable sesquiterpene synthase (A)	probable sesquiterpene synthase [Chenopodium quinoa]	RecName: Full=Probable sesquiterpene synthase; Short=SmSTPS; EC=4.2.3.-;	SubName: Full=Uncharacterized protein {ECO:0000313|EMBL:KNA15781.1};	--	GO:0000287,magnesium ion binding; GO:0010333,terpene synthase activity; GO:0008152,metabolic process	Terpene synthase family, metal binding domain
gene-LOC110693225	6.94	3.76	7.59	2.53	1.93	4.42	629	334	606	225	169	387	2.316	1.211	0.00168071	0.0216982	up	NW_018744143.1	1795412	1817283	+	LOC110693225	--	K20307 trafficking protein particle complex subunit 10 | (RefSeq) trafficking protein particle complex II-specific subunit 130 homolog isoform X1 (A)	trafficking protein particle complex II-specific subunit 130 homolog isoform X1 [Chenopodium quinoa]	RecName: Full=Trafficking protein particle complex II-specific subunit 130 homolog {ECO:0000305}; Short=AtTRS130 {ECO:0000303|PubMed:20713617}; Short=TRAPP II-specific subunit 130 homolog {ECO:0000305};	SubName: Full=Uncharacterized protein {ECO:0000313|EMBL:KNA16796.1};	Putative transmembrane protein	GO:0005829,cytosol; GO:0005769,early endosome; GO:0005802,trans-Golgi network; GO:1990071,TRAPPII protein complex; GO:0000919,cell plate assembly; GO:0000911,cytokinesis by cell plate formation; GO:0034498,early endosome to Golgi transport; GO:0006891,intra-Golgi vesicle-mediated transport	Trafficking protein particle complex subunit 10, TRAPPC10
gene-LOC110693227	19.39	9.68	25.15	4.77	3.23	5.18	730	357	834	176	117	188	4.494	2.168	1.55421e-07	6.78561e-06	up	NW_018744143.1	1829998	1832608	-	LOC110693227	--	--	uncharacterized protein LOC110693227 [Chenopodium quinoa]	--	SubName: Full=Uncharacterized protein {ECO:0000313|EMBL:KNA18011.1};	--	GO:0016021,integral component of membrane; GO:0008168,methyltransferase activity	Methyltransferase domain
gene-LOC110693232	86.59	51.35	47.4	12.62	27.36	10.28	2924	1698	1410	418	890	335	3.725	1.897	0.000475495	0.00781962	up	NW_018744143.1	1941267	1943146	-	LOC110693232	--	K00521 ferric-chelate reductase [EC:1.16.1.7] | (RefSeq) ferric reduction oxidase 7, chloroplastic-like (A)	NAC domain-containing protein 72-like [Chenopodium quinoa]	RecName: Full=NAC domain-containing protein 72; Short=ANAC072; AltName: Full=Protein RESPONSIVE TO DESICCATION 26;	SubName: Full=Putative NAC transcription factor {ECO:0000313|EMBL:AIM47115.1};	--	GO:0005634,nucleus; GO:0003677,DNA binding; GO:0006355,regulation of transcription, DNA-templated; GO:0006351,transcription, DNA-templated	No apical meristem (NAM) protein
gene-LOC110693245	3.7	2.84	3.22	0.1	0.19	0.17	185	139	142	5	9	8	23.08	4.529	2.20675e-21	7.54707e-19	up	NW_018744143.1	2192899	2195353	-	LOC110693245	--	K01176 alpha-amylase [EC:3.2.1.1] | (RefSeq) lectin-domain containing receptor kinase VI.3-like (A)	L-type lectin-domain containing receptor kinase IX.1-like [Chenopodium quinoa]	RecName: Full=L-type lectin-domain containing receptor kinase IX.1 {ECO:0000303|PubMed:19773388}; Short=LecRK-IX.1 {ECO:0000303|PubMed:19773388}; EC=2.7.11.1 {ECO:0000255|PROSITE-ProRule:PRU00159}; Flags: Precursor;	SubName: Full=Uncharacterized protein {ECO:0000313|EMBL:KMS97961.1};	--	GO:0016021,integral component of membrane; GO:0005886,plasma membrane; GO:0005524,ATP binding; GO:0030246,carbohydrate binding; GO:0004674,protein serine/threonine kinase activity; GO:0002229,defense response to oomycetes; GO:0010942,positive regulation of cell death; GO:0010726,positive regulation of hydrogen peroxide metabolic process	Legume lectin domain
gene-LOC110693339	5.93	0.59	5.62	0.31	0.67	0.27	296	29	247	15	32	13	10.135	3.341	5.36276e-05	0.00121595	up	NW_018744147.1	31639	37057	+	LOC110693339	--	--	--	--	--	--	--	--
gene-LOC110693367	3.92	5.51	3.27	2.05	1.73	2.28	467	643	343	240	199	262	2.216	1.148	1.86855e-05	0.00048775	up	NW_018744151.1	924259	932971	-	LOC110693367	--	K20606 mitogen-activated protein kinase kinase kinase ANP1 [EC:2.7.11.25] | (RefSeq) receptor-like serine/threonine-protein kinase SD1-7 isoform X1 (A)	uncharacterized protein LOC110693367 [Chenopodium quinoa]	RecName: Full=G-type lectin S-receptor-like serine/threonine-protein kinase At1g11330; EC=2.7.11.1; Flags: Precursor;	SubName: Full=uncharacterized protein LOC107858220 {ECO:0000313|RefSeq:XP_016558400.1};	--	GO:0016021,integral component of membrane; GO:0005886,plasma membrane; GO:0005524,ATP binding; GO:0005516,calmodulin binding; GO:0030246,carbohydrate binding; GO:0004674,protein serine/threonine kinase activity; GO:0006468,protein phosphorylation; GO:0048544,recognition of pollen	Protein tyrosine kinase
gene-LOC110693378	6.86	1.21	1.7	0.76	0.57	0.18	780	135	170	85	62	20	6.873	2.781	0.000456019	0.00753962	up	NW_018744151.1	1085600	1093665	-	LOC110693378	--	--	--	--	--	--	--	--
gene-LOC110693415	1.11	1.33	0.52	0.17	0.12	0	39	46	16	6	4	0	10.136	3.341	0.000342603	0.00598033	up	NW_018744151.1	3569718	3577631	+	LOC110693415	--	--	late embryogenesis abundant protein D-29-like [Chenopodium quinoa]	RecName: Full=Late embryogenesis abundant protein At3g53040 {ECO:0000305}; AltName: Full=LEA domain-containing protein At3g53040 {ECO:0000305};	SubName: Full=Uncharacterized protein {ECO:0000313|EMBL:KNA08407.1};	Uncharacterized conserved protein	GO:0005829,cytosol; GO:0010227,floral organ abscission	YtxH-like protein
gene-LOC110693419	0.17	0.11	0.19	0.02	0	0	9	6	9	1	0	0	24.44	4.611	0.00368348	0.0399803	up	NW_018744151.1	76603	80107	-	LOC110693419	--	--	--	--	--	--	--	--
gene-LOC110693420	0.66	0.15	0.53	0	0.05	0.05	40	9	28	0	3	3	14.471	3.855	0.000281634	0.00505955	up	NW_018744151.1	98370	102095	-	LOC110693420	--	K06883 uncharacterized protein | (RefSeq) LOW QUALITY PROTEIN: uncharacterized protein LOC104799061 (A)	putative receptor-like protein kinase At4g00960 [Chenopodium quinoa]	RecName: Full=Cysteine-rich receptor-like protein kinase 10; Short=Cysteine-rich RLK10; EC=2.7.11.-; AltName: Full=Receptor-like protein kinase 4; Flags: Precursor;	SubName: Full=Uncharacterized protein {ECO:0000313|EMBL:BAT93993.1};	--	GO:0016021,integral component of membrane; GO:0005886,plasma membrane; GO:0005524,ATP binding; GO:0004674,protein serine/threonine kinase activity; GO:0042742,defense response to bacterium; GO:0006468,protein phosphorylation	Protein kinase domain
gene-LOC110693423	5.11	7.38	5.57	0	0	0	75	106	72	0	0	0	489.435	8.935	8.38438e-13	9.05513e-11	up	NW_018742345.1	8641322	8642880	+	LOC110693423	--	--	--	--	--	--	--	--
gene-LOC110693426	24.52	14.6	18.74	1.55	0.29	1.28	1129	658	760	70	13	57	20.836	4.381	3.45644e-17	6.86382e-15	up	NW_018744151.1	68489	71324	-	LOC110693426	--	K20606 mitogen-activated protein kinase kinase kinase ANP1 [EC:2.7.11.25] | (RefSeq) receptor-like serine/threonine-protein kinase SD1-7 isoform X1 (A)	putative receptor-like protein kinase At4g00960 [Chenopodium quinoa]	RecName: Full=Cysteine-rich receptor-like protein kinase 10; Short=Cysteine-rich RLK10; EC=2.7.11.-; AltName: Full=Receptor-like protein kinase 4; Flags: Precursor;	SubName: Full=Uncharacterized protein {ECO:0000313|EMBL:CAN74851.1};	--	GO:0016021,integral component of membrane; GO:0005886,plasma membrane; GO:0005524,ATP binding; GO:0004674,protein serine/threonine kinase activity; GO:0042742,defense response to bacterium; GO:0006468,protein phosphorylation	Protein kinase domain
gene-LOC110693433	16.85	10.66	17.69	0.05	0	0.03	626	388	579	2	0	1	592.659	9.211	1.04913e-23	4.78405e-21	up	NW_018744151.1	62082	64349	-	LOC110693433	--	--	--	--	--	--	--	--
gene-LOC110693434	0.56	0.41	0.05	0	0	0	24	17	2	0	0	0	83.894	6.39	0.000246674	0.00453743	up	NW_018744151.1	52377	56639	+	LOC110693434	--	K06883 uncharacterized protein | (RefSeq) LOW QUALITY PROTEIN: uncharacterized protein LOC104799061 (A)	putative receptor-like protein kinase At4g00960 [Chenopodium quinoa]	RecName: Full=Putative cysteine-rich receptor-like protein kinase 20; Short=Cysteine-rich RLK20; EC=2.7.11.-; Flags: Precursor;	SubName: Full=cysteine-rich receptor-like protein kinase 25 {ECO:0000313|RefSeq:XP_018852726.1};	--	GO:0016021,integral component of membrane; GO:0005886,plasma membrane; GO:0005524,ATP binding; GO:0004674,protein serine/threonine kinase activity; GO:0006468,protein phosphorylation	Protein kinase domain
gene-LOC110693439	0.4	0.53	0.46	0.12	0.09	0.12	14	18	14	4	3	4	4.524	2.178	0.00412279	0.0433104	up	NW_018744151.1	5874	7951	+	LOC110693439	--	K01183 chitinase [EC:3.2.1.14] | (RefSeq) chitinase-3-like protein 2 (A)	cysteine-rich receptor-like protein kinase 6 [Chenopodium quinoa]	RecName: Full=Cysteine-rich receptor-like protein kinase 6; Short=Cysteine-rich RLK6; EC=2.7.11.-; AltName: Full=Receptor-like protein kinase 5; Flags: Precursor;	SubName: Full=putative receptor-like protein kinase At4g00960 {ECO:0000313|RefSeq:XP_010278041.1};	--	GO:0016021,integral component of membrane; GO:0005886,plasma membrane; GO:0005524,ATP binding; GO:0004672,protein kinase activity; GO:0004674,protein serine/threonine kinase activity; GO:0042742,defense response to bacterium; GO:0000302,response to reactive oxygen species	Protein kinase domain
gene-LOC110693457	1.43	0.97	1.68	0.23	0.06	0.26	51	34	53	8	2	9	8.264	3.047	1.24995e-06	4.44352e-05	up	NW_018744151.1	396193	406066	+	LOC110693457	--	K14173 alpha-farnesene synthase [EC:4.2.3.46] | (RefSeq) alpha-farnesene synthase-like (A)	alpha-farnesene synthase-like [Chenopodium quinoa]	RecName: Full=Alpha-farnesene synthase; EC=4.2.3.46; AltName: Full=(E,E)-alpha-farnesene synthase; AltName: Full=Terpene synthase 7; Short=RcSeTPS7;	SubName: Full=Uncharacterized protein {ECO:0000313|EMBL:KMS96558.1};	--	GO:0000287,magnesium ion binding; GO:0010334,sesquiterpene synthase activity; GO:0051762,sesquiterpene biosynthetic process	Terpene synthase family, metal binding domain
gene-LOC110693462	12.41	21.93	10.13	2.43	1.67	4.21	626	1083	450	120	81	205	5.867	2.553	2.84762e-12	2.77519e-10	up	NW_018744151.1	505519	528808	-	LOC110693462	--	K14175 (3S,6E)-nerolidol synthase [EC:4.2.3.48] | (RefSeq) (3S,6E)-nerolidol synthase 1-like (A)	(3S,6E)-nerolidol synthase 1-like [Chenopodium quinoa]	RecName: Full=(3S,6E)-nerolidol synthase 1; Short=FaNES1; EC=4.2.3.48;	SubName: Full=Uncharacterized protein {ECO:0000313|EMBL:KMT04064.1};	--	GO:0005829,cytosol; GO:0000287,magnesium ion binding; GO:0010333,terpene synthase activity; GO:0016114,terpenoid biosynthetic process	Terpene synthase family, metal binding domain
gene-LOC110693483	0.7	0.69	0.62	0.03	0.11	0.08	27	26	21	1	4	3	9.949	3.315	2.68963e-05	0.000670791	up	NW_018744151.1	873095	874985	-	LOC110693483	--	K10260 F-box and WD-40 domain protein 7 | (RefSeq) WD40/YVTN repeat-like-containing domain (A)	U-box domain-containing protein 8-like [Chenopodium quinoa]	RecName: Full=U-box domain-containing protein 8; EC=2.3.2.27; AltName: Full=Plant U-box protein 8; AltName: Full=RING-type E3 ubiquitin transferase PUB8 {ECO:0000305};	RecName: Full=RING-type E3 ubiquitin transferase {ECO:0000256|SAAS:SAAS00702733}; EC=2.3.2.27 {ECO:0000256|SAAS:SAAS00702733};	FOG: Armadillo/beta-catenin-like repeats	GO:0005737,cytoplasm; GO:0005634,nucleus; GO:0004842,ubiquitin-protein transferase activity; GO:0016567,protein ubiquitination	U-box domain
gene-LOC110693537	0.31	0.16	0.14	0	0	0	18	9	7	0	0	0	67.547	6.078	0.000158563	0.00310865	up	NW_018744151.1	1747398	1754067	-	LOC110693537	--	--	--	--	--	--	--	--
gene-LOC110693623	78.34	60.04	30.32	13.71	20.2	3.43	2109	1583	719	362	524	89	4.435	2.149	0.00159699	0.0208876	up	NW_018744151.1	3333225	3336584	+	LOC110693623	--	--	uncharacterized protein LOC110693623 [Chenopodium quinoa]	--	SubName: Full=Uncharacterized protein {ECO:0000313|EMBL:KNA08111.1};	--	--	PDDEXK-like family of unknown function
gene-LOC110693686	29.29	27.49	29.95	13.4	15.38	14.59	1471	1352	1325	660	744	707	2.097	1.068	4.51528e-05	0.00104913	up	NW_018744151.1	4481300	4487149	-	LOC110693686	--	K14486 auxin response factor | (RefSeq) auxin response factor 3-like (A)	auxin response factor 3-like [Chenopodium quinoa]	RecName: Full=Auxin response factor 3; AltName: Full=Protein ETTIN;	RecName: Full=Auxin response factor {ECO:0000256|RuleBase:RU004561};	--	GO:0005634,nucleus; GO:0003677,DNA binding; GO:0003700,DNA-binding transcription factor activity; GO:0010158,abaxial cell fate specification; GO:0009850,auxin metabolic process; GO:0009734,auxin-activated signaling pathway; GO:0010582,floral meristem determinacy; GO:0009733,response to auxin; GO:0006351,transcription, DNA-templated; GO:0010050,vegetative phase change	Auxin response factor
gene-LOC110693691	2.08	3.09	1.81	0.9	0.57	1.65	103	150	79	44	27	79	2.474	1.307	0.00105051	0.0149525	up	NW_018744151.1	4640271	4647842	-	LOC110693691	--	--	uncharacterized protein LOC110693691 isoform X1 [Chenopodium quinoa]	--	SubName: Full=Uncharacterized protein {ECO:0000313|EMBL:KNA25221.1};	--	--	TPL-binding domain in jasmonate signalling
gene-LOC110693717	7.36	9.74	7.47	2.28	4.38	1.83	234	303	209	71	134	56	2.866	1.519	0.00154819	0.0203574	up	NW_018744151.1	4950738	4955316	-	LOC110693717	--	K00430 peroxidase [EC:1.11.1.7] | (RefSeq) peroxidase 19-like (A)	peroxidase 19-like [Chenopodium quinoa]	RecName: Full=Peroxidase 19; Short=Atperox P19; EC=1.11.1.7; AltName: Full=ATP51; Flags: Precursor;	RecName: Full=Peroxidase {ECO:0000256|RuleBase:RU362060, ECO:0000256|SAAS:SAAS00709852}; EC=1.11.1.7 {ECO:0000256|RuleBase:RU362060, ECO:0000256|SAAS:SAAS00709852};	--	GO:0005576,extracellular region; GO:0009505,plant-type cell wall; GO:0009506,plasmodesma; GO:0020037,heme binding; GO:0046872,metal ion binding; GO:0004601,peroxidase activity; GO:0042744,hydrogen peroxide catabolic process; GO:0009664,plant-type cell wall organization; GO:0006979,response to oxidative stress	Peroxidase
gene-LOC110693738	0.75	1.64	0.49	0	0	0	7	15	4	0	0	0	49.119	5.618	0.0011184	0.0157368	up	NW_018744151.1	274249	274785	-	LOC110693738	--	--	high mobility group B protein 15-like [Chenopodium quinoa]	RecName: Full=High mobility group B protein 15; AltName: Full=Nucleosome/chromatin assembly factor group D 15;	SubName: Full=Uncharacterized protein {ECO:0000313|EMBL:KNA19399.1};	DNA-binding proteins Bright/BRCAA1/RBP1 and related proteins containing BRIGHT domain	GO:0005634,nucleus; GO:0090406,pollen tube; GO:0003700,DNA-binding transcription factor activity; GO:0000400,four-way junction DNA binding; GO:0043565,sequence-specific DNA binding; GO:0008134,transcription factor binding; GO:0044212,transcription regulatory region DNA binding; GO:0019760,glucosinolate metabolic process; GO:0009846,pollen germination; GO:0009860,pollen tube growth; GO:0006355,reg…	--
gene-LOC110693747	0.99	1.46	1.48	0.25	0.32	0.19	16	23	21	4	5	3	5.278	2.4	0.000992313	0.0142726	up	NW_018744151.1	1105564	1106470	+	LOC110693747	--	--	PH domain-containing protein YHR131C-like [Chenopodium quinoa]	--	SubName: Full=Uncharacterized protein {ECO:0000313|EMBL:KMS95056.1};	--	GO:0005622,intracellular; GO:0008270,zinc ion binding	--
gene-LOC110693821	3.5	2.92	2.14	1.03	0.99	0.66	180	147	97	52	49	33	3.319	1.731	9.68604e-05	0.00203829	up	NW_018744167.1	1340827	1348212	+	LOC110693821	--	K23717 solute carrier family 23 (nucleobase transporter), member 2 | (RefSeq) nucleobase-ascorbate transporter 4-like (A)	LOW QUALITY PROTEIN: nucleobase-ascorbate transporter 3-like [Chenopodium quinoa]	RecName: Full=Nucleobase-ascorbate transporter 3; Short=AtNAT3;	SubName: Full=Uncharacterized protein {ECO:0000313|EMBL:KNA09242.1};	Xanthine/uracil transporters	GO:0016021,integral component of membrane; GO:0005886,plasma membrane; GO:0009506,plasmodesma; GO:0015207,adenine transmembrane transporter activity; GO:0015208,guanine transmembrane transporter activity; GO:0015294,solute:cation symporter activity; GO:0015210,uracil transmembrane transporter activity; GO:0098702,adenine import across plasma membrane; GO:0098710,guanine import across plasma membr…	Permease family
gene-LOC110693867	20.6	29.85	25.03	3.74	9.11	4.9	270	383	289	48	115	62	4.253	2.089	4.69068e-06	0.000143542	up	NW_018742204.1	16121492	16122134	-	LOC110693867	--	--	uncharacterized protein LOC110693867 [Chenopodium quinoa]	--	SubName: Full=Uncharacterized protein {ECO:0000313|EMBL:KMS97389.1};	--	--	DVL family
gene-LOC110693898	2.91	6.86	6.63	2.77	2.14	3.16	107	247	215	100	76	112	2.123	1.086	0.00235925	0.0282376	up	NW_018744167.1	2333252	2335188	-	LOC110693898	--	--	probable membrane-associated kinase regulator 5 [Chenopodium quinoa]	--	SubName: Full=Uncharacterized protein {ECO:0000313|EMBL:KNA24896.1};	--	--	--
gene-LOC110693904	8.72	9.12	10.45	3.06	4.98	2	253	259	267	87	139	56	2.802	1.486	0.00175258	0.0224301	up	NW_018744167.1	2441287	2442709	-	LOC110693904	--	K07052 uncharacterized protein | (RefSeq) uncharacterized LOC109194101 (A)	probable membrane-associated kinase regulator 6 [Chenopodium quinoa]	RecName: Full=Probable membrane-associated kinase regulator 6;	SubName: Full=Uncharacterized protein {ECO:0000313|EMBL:KNA14602.1};	--	GO:0005886,plasma membrane; GO:0009738,abscisic acid-activated signaling pathway	--
gene-LOC110693957	0.25	0.78	0.08	0	0	0	10	31	3	0	0	0	81.313	6.345	0.000219284	0.00411976	up	NW_018744167.1	2016028	2020292	+	LOC110693957	--	K06943 nucleolar GTP-binding protein | (RefSeq) uncharacterized protein LOC108835530 (A)	uncharacterized protein LOC110693957 [Chenopodium quinoa]	RecName: Full=Putative ribonuclease H protein At1g65750; EC=3.1.26.4;	SubName: Full=Uncharacterized protein {ECO:0000313|EMBL:KMS97068.1};	FOG: Reverse transcriptase	GO:0046872,metal ion binding; GO:0003676,nucleic acid binding; GO:0004523,RNA-DNA hybrid ribonuclease activity	Reverse transcriptase (RNA-dependent DNA polymerase)
gene-LOC110694112	6.28	7.71	5.62	1.79	1.38	2.63	104	125	82	29	22	42	3.672	1.876	3.90477e-08	1.89274e-06	up	NW_018744239.1	1810889	1823860	-	LOC110694112	--	K00432 glutathione peroxidase [EC:1.11.1.9] | (RefSeq) probable glutathione peroxidase 5 (A)	uncharacterized protein LOC110694112 [Chenopodium quinoa]	RecName: Full=Probable glutathione peroxidase 5; EC=1.11.1.9;	RecName: Full=Glutathione peroxidase {ECO:0000256|RuleBase:RU000499};	Glutathione peroxidase	GO:0012505,endomembrane system; GO:0005783,endoplasmic reticulum; GO:0005886,plasma membrane; GO:0004602,glutathione peroxidase activity; GO:0009793,embryo development ending in seed dormancy; GO:0006979,response to oxidative stress	Glutathione peroxidase
gene-LOC110694126	4.61	6.68	8.24	2.2	1.7	4.83	284	403	447	133	101	287	2.484	1.313	0.000204456	0.00388067	up	NW_018744239.1	2246655	2252411	-	LOC110694126	--	K03549 KUP system potassium uptake protein | (RefSeq) potassium transporter 6-like (A)	potassium transporter 6-like [Chenopodium quinoa]	RecName: Full=Potassium transporter 6; Short=AtHAK6; Short=AtPOT6;	RecName: Full=Potassium transporter {ECO:0000256|RuleBase:RU321113};	--	GO:0016021,integral component of membrane; GO:0005886,plasma membrane; GO:0015079,potassium ion transmembrane transporter activity	K+ potassium transporter
gene-LOC110694160	1.12	1.73	1.3	0.45	0.33	1.03	67	101	68	26	19	59	2.558	1.355	0.00144636	0.0193351	up	NW_018744239.1	2900495	2906242	-	LOC110694160	--	--	--	--	--	--	--	--
gene-LOC110694205	21.9	10.3	13.58	8.62	5.73	6.68	2315	1066	1265	894	584	681	2.361	1.239	0.00249848	0.0295929	up	NW_018744239.1	3638018	3658767	+	LOC110694205	--	K08244 alpha-glucan, water dikinase [EC:2.7.9.4] | (RefSeq) alpha-glucan water dikinase, chloroplastic-like (A)	alpha-glucan water dikinase, chloroplastic-like [Chenopodium quinoa]	RecName: Full=Alpha-glucan water dikinase, chloroplastic; EC=2.7.9.4; AltName: Full=Starch-related protein R1; Flags: Precursor;	SubName: Full=Uncharacterized protein {ECO:0000313|EMBL:KNA11066.1};	--	GO:0009507,chloroplast; GO:0050521,alpha-glucan, water dikinase activity; GO:0005524,ATP binding; GO:0046872,metal ion binding; GO:0005975,carbohydrate metabolic process	Pyruvate phosphate dikinase, PEP/pyruvate binding domain
gene-LOC110694212	2.5	0.03	2.6	0	0	0	96	1	88	0	0	0	382.977	8.581	0.00095501	0.0137988	up	NW_018744239.1	3885983	3889210	-	LOC110694212	--	--	--	--	--	--	--	--
gene-LOC110694232	1.78	0.74	2.75	0.08	0.25	0.34	22	9	30	1	3	4	8.614	3.107	0.000897334	0.0131419	up	NW_018744239.1	4465973	4468651	+	LOC110694232	--	--	uncharacterized protein LOC110694232 [Chenopodium quinoa]	--	SubName: Full=Uncharacterized protein {ECO:0000313|EMBL:KNA24355.1}; Flags: Fragment;	--	--	Replication factor-A C terminal domain
gene-LOC110694378	1.56	2.74	2.01	0.04	0	0.04	43	74	49	1	0	1	89.972	6.491	9.11524e-09	5.01759e-07	up	NW_018742345.1	4610156	4612841	+	LOC110694378	--	K15255 ATP-dependent DNA helicase PIF1 [EC:3.6.4.12] | (RefSeq) ATP-dependent DNA helicase PIF1-like (A)	uncharacterized protein LOC110694378 isoform X2 [Chenopodium quinoa]	--	SubName: Full=Uncharacterized protein {ECO:0000313|EMBL:KNA09791.1}; Flags: Fragment;	--	GO:0008234,cysteine-type peptidase activity	Ulp1 protease family, C-terminal catalytic domain
gene-LOC110694389	0.18	1.2	0.73	0.04	0	0.11	5	33	18	1	0	3	15.578	3.961	0.00100455	0.0144093	up	NW_018742345.1	4607717	4610136	+	LOC110694389	--	--	uncharacterized protein LOC110694389 [Chenopodium quinoa]	--	SubName: Full=Uncharacterized protein {ECO:0000313|EMBL:KNA25579.1}; Flags: Fragment;	--	--	--
gene-LOC110694414	27.61	26.22	16.63	8.92	3.45	8.07	897	834	476	284	108	253	3.79	1.922	1.05293e-06	3.78684e-05	up	NW_018744239.1	6941337	6942930	+	LOC110694414	--	K09645 vitellogenic carboxypeptidase-like protein [EC:3.4.16.-] | (RefSeq) serine carboxypeptidase-like 50 (A)	serine carboxypeptidase-like 50 [Chenopodium quinoa]	RecName: Full=Serine carboxypeptidase-like 50; EC=3.4.16.-; Flags: Precursor;	RecName: Full=Carboxypeptidase {ECO:0000256|RuleBase:RU361156}; EC=3.4.16.- {ECO:0000256|RuleBase:RU361156};	Serine carboxypeptidases (lysosomal cathepsin A)	GO:0005576,extracellular region; GO:0005773,vacuole; GO:0004185,serine-type carboxypeptidase activity; GO:0051603,proteolysis involved in cellular protein catabolic process	Serine carboxypeptidase
gene-LOC110694424	4.16	2.31	2.97	0.6	0.11	0.92	197	107	124	28	5	42	6.766	2.758	5.0855e-06	0.00015384	up	NW_018744239.1	7255442	7260510	-	LOC110694424	--	K01840 phosphomannomutase [EC:5.4.2.8] | (RefSeq) uncharacterized protein LOC107434468 (A)	uncharacterized protein LOC110694424 [Chenopodium quinoa]	--	SubName: Full=Uncharacterized protein {ECO:0000313|EMBL:KNA03284.1};	Phosphoglucomutase/phosphomannomutase	GO:0016868,intramolecular transferase activity, phosphotransferases; GO:0005975,carbohydrate metabolic process	Phosphoglucomutase/phosphomannomutase, alpha/beta/alpha domain I
gene-LOC110694426	10.91	14.98	12.58	6.5	5.1	8.63	313	421	318	183	141	239	2.041	1.03	7.92964e-07	2.97349e-05	up	NW_018744239.1	7347894	7350515	+	LOC110694426	--	--	uncharacterized protein At4g22758-like [Chenopodium quinoa]	RecName: Full=Uncharacterized protein At4g22758;	SubName: Full=Uncharacterized protein {ECO:0000313|EMBL:KMT08047.1};	FOG: PPR repeat	--	--
gene-LOC110694451	1.77	0.11	0.16	0.07	0	0.04	51	3	4	2	0	1	22.674	4.503	0.00348913	0.0384962	up	NW_018744239.1	8150914	8155159	+	LOC110694451	--	K09510 DnaJ homolog subfamily B member 4 | (RefSeq) dnaJ homolog subfamily B member 1-like (A)	uncharacterized protein LOC110694451 [Chenopodium quinoa]	RecName: Full=DnaJ protein ERDJ3B {ECO:0000305}; AltName: Full=Chaperone protein dnaJ B6 {ECO:0000305}; Short=OsDjB6 {ECO:0000303|PubMed:23160806}; AltName: Full=Endoplasmic reticulum dnaJ domain-containing protein 3B {ECO:0000305}; Short=OsERdj3B {ECO:0000303|PubMed:24153418}; Flags: Precursor;	SubName: Full=dnaJ homolog subfamily B member 7-like isoform X1 {ECO:0000313|RefSeq:XP_018835258.1};	Molecular chaperone (DnaJ superfamily)	GO:0005788,endoplasmic reticulum lumen; GO:0051082,unfolded protein binding; GO:0006457,protein folding	DnaJ domain
gene-LOC110694466	0.66	0.04	0.61	0	0	0	33	2	27	0	0	0	127.632	6.996	5.01648e-05	0.00114517	up	NW_018744239.1	9129619	9134513	+	LOC110694466	--	K14489 arabidopsis histidine kinase 2/3/4 (cytokinin receptor) [EC:2.7.13.3] | (RefSeq) histidine kinase 2-like (A)	histidine kinase 2-like [Chenopodium quinoa]	RecName: Full=Histidine kinase 2; EC=2.7.13.3; AltName: Full=Arabidopsis histidine kinase 2; Short=AtHK2; AltName: Full=Protein AUTHENTIC HIS-KINASE 2;	SubName: Full=Uncharacterized protein {ECO:0000313|EMBL:KNA16447.1};	Sensory transduction histidine kinase	GO:0005789,endoplasmic reticulum membrane; GO:0016021,integral component of membrane; GO:0005886,plasma membrane; GO:0009884,cytokinin receptor activity; GO:0042802,identical protein binding; GO:0019900,kinase binding; GO:0000155,phosphorelay sensor kinase activity; GO:0004673,protein histidine kinase activity; GO:0043424,protein histidine kinase binding; GO:0071215,cellular response to abscisic …	CHASE domain
gene-LOC110694470	0.28	0.55	0.57	0	0.06	0.02	14	27	25	0	3	1	17.181	4.103	7.32687e-05	0.00160133	up	NW_018744239.1	9391132	9394230	-	LOC110694470	--	--	--	--	--	--	--	--
gene-LOC110694475	2.12	2.19	1.84	0	0	0	102	103	78	0	0	0	552.558	9.11	2.64499e-13	3.03402e-11	up	NW_018744239.1	9763133	9766274	-	LOC110694475	--	--	--	--	--	--	--	--
gene-LOC110694480	0.89	2.03	0.84	0.58	0.15	0.4	30	67	25	19	5	13	3.525	1.818	0.00470233	0.0478077	up	NW_018744239.1	9953710	9959800	-	LOC110694480	--	K01778 diaminopimelate epimerase [EC:5.1.1.7] | (RefSeq) LOW QUALITY PROTEIN: diaminopimelate epimerase, chloroplastic-like (A)	LOW QUALITY PROTEIN: diaminopimelate epimerase, chloroplastic-like [Chenopodium quinoa]	RecName: Full=Diaminopimelate epimerase, chloroplastic; Short=DAP epimerase; EC=5.1.1.7; Flags: Precursor;	SubName: Full=Uncharacterized protein {ECO:0000313|EMBL:KNA11730.1};	--	GO:0009507,chloroplast; GO:0009570,chloroplast stroma; GO:0005829,cytosol; GO:0008837,diaminopimelate epimerase activity; GO:0009089,lysine biosynthetic process via diaminopimelate	Diaminopimelate epimerase
gene-LOC110694507	0.42	0.8	1.03	0.1	0.05	0.35	29	54	62	7	3	23	5.155	2.366	0.000536896	0.00865218	up	NW_018744239.1	11905521	11911263	-	LOC110694507	--	K15047 heterogeneous nuclear ribonucleoprotein U-like protein 1 | (RefSeq) heterogeneous nuclear ribonucleoprotein U-like protein 1 (A)	uncharacterized protein LOC110694507 [Chenopodium quinoa]	--	--	--	--	--
gene-LOC110694529	7.85	7.95	2.16	2.25	1.73	1.18	235	233	57	66	50	34	3.61	1.852	0.00184649	0.0233888	up	NW_018744239.1	2053820	2055287	-	LOC110694529	--	K01381 saccharopepsin [EC:3.4.23.25] | (RefSeq) aspartic proteinase CDR1-like (A)	aspartic proteinase CDR1-like [Chenopodium quinoa]	RecName: Full=Aspartic proteinase CDR1; EC=3.4.23.-; AltName: Full=Protein CONSTITUTIVE DISEASE RESISTANCE 1; Flags: Precursor;	SubName: Full=Uncharacterized protein {ECO:0000313|EMBL:KNA06676.1};	Aspartyl protease	GO:0048046,apoplast; GO:0004190,aspartic-type endopeptidase activity; GO:0042742,defense response to bacterium; GO:0030163,protein catabolic process; GO:0010310,regulation of hydrogen peroxide metabolic process; GO:0010337,regulation of salicylic acid metabolic process	Xylanase inhibitor N-terminal
gene-LOC110694642	3.88	4.63	4.33	0.06	0	0	65	76	64	1	0	0	205.127	7.68	8.32554e-10	5.55076e-08	up	NW_018742345.1	6795953	6799788	+	LOC110694642	--	--	--	--	--	--	--	--
gene-LOC110694665	3.95	3.96	4.9	1.55	1.26	2.24	179	176	196	69	55	98	2.752	1.461	9.25725e-08	4.20573e-06	up	NW_018742345.1	6989936	7000144	+	LOC110694665	--	K02563 UDP-N-acetylglucosamine--N-acetylmuramyl-(pentapeptide) pyrophosphoryl-undecaprenol N-acetylglucosamine transferase [EC:2.4.1.227] | (RefSeq) uncharacterized protein LOC110694665 (A)	uncharacterized protein LOC110694665 [Chenopodium quinoa]	--	SubName: Full=Uncharacterized protein {ECO:0000313|EMBL:KNA19339.1};	--	GO:0016021,integral component of membrane; GO:0050511,undecaprenyldiphospho-muramoylpentapeptide beta-N-acetylglucosaminyltransferase activity; GO:0005975,carbohydrate metabolic process; GO:0030259,lipid glycosylation	Glycosyltransferase family 28 C-terminal domain
gene-LOC110694826	1.98	3.45	3.66	0.63	1.01	0.97	51	87	83	16	25	24	3.618	1.855	2.33573e-05	0.000592939	up	NW_018744249.1	219607	222937	-	LOC110694826	--	--	LOW QUALITY PROTEIN: CASP-like protein 4A1 [Chenopodium quinoa]	RecName: Full=CASP-like protein 4A1; Short=AtCASPL4A1;	RecName: Full=CASP-like protein {ECO:0000256|RuleBase:RU361233};	--	GO:0016021,integral component of membrane; GO:0005886,plasma membrane; GO:0051536,iron-sulfur cluster binding	Domain of unknown function (DUF588)
gene-LOC110694882	0.34	1.03	0.83	0.14	0.14	0.34	25	73	53	10	10	24	3.781	1.919	0.000724975	0.0110743	up	NW_018742345.1	8899020	8902811	+	LOC110694882	--	K15078 structure-specific endonuclease subunit SLX1 [EC:3.6.1.-] | (RefSeq) putative disease resistance protein RGA1 (A)	disease resistance protein RGA2-like isoform X1 [Chenopodium quinoa]	RecName: Full=Putative disease resistance protein RGA4; AltName: Full=RGA4-blb;	SubName: Full=Uncharacterized protein {ECO:0000313|EMBL:KNA21314.1};	Apoptotic ATPase	GO:0043531,ADP binding; GO:0005524,ATP binding; GO:0006952,defense response	NB-ARC domain
gene-LOC110694888	3.36	5.08	7.75	0	0	0	145	215	295	0	0	0	1282.49	10.325	1.83953e-16	3.25095e-14	up	NW_018744268.1	3791515	3795826	+	LOC110694888	--	--	--	--	--	--	--	--
gene-LOC110694917	8	11.62	12.26	0	0	0	83	118	112	0	0	0	608.859	9.25	9.34675e-14	1.13191e-11	up	NW_018744268.1	2172676	2174257	-	LOC110694917	--	--	--	--	--	--	--	--
gene-LOC110694955	3.65	4.01	4.15	0.76	0.46	1.23	132	142	132	27	16	43	5.289	2.403	4.66606e-12	4.39657e-10	up	NW_018744284.1	949997	956991	-	LOC110694955	--	K10770 alkylated DNA repair protein alkB homolog 8 [EC:1.14.11.- 2.1.1.229] | (RefSeq) alkylated DNA repair protein alkB homolog 8-like (A)	alkylated DNA repair protein alkB homolog 8-like [Chenopodium quinoa]	RecName: Full=tRNA (carboxymethyluridine(34)-5-O)-methyltransferase {ECO:0000305}; EC=2.1.1.229 {ECO:0000305|PubMed:21653555}; AltName: Full=tRNA methyltransferase 9 homolog {ECO:0000305}; Short=AtTRM9 {ECO:0000303|PubMed:21653555};	SubName: Full=Uncharacterized protein {ECO:0000313|EMBL:KNA20498.1};	Predicted methyltransferase	GO:0005737,cytoplasm; GO:0005634,nucleus; GO:0008198,ferrous iron binding; GO:0016706,oxidoreductase activity, acting on paired donors, with incorporation or reduction of molecular oxygen, 2-oxoglutarate as one donor, and incorporation of one atom each of oxygen into both donors; GO:0016300,tRNA (uracil) methyltransferase activity; GO:0000049,tRNA binding; GO:0008175,tRNA methyltransferase activi…	Methyltransferase domain
gene-LOC110695058	3.33	4.24	3.41	0.12	0.02	0.29	145	181	131	5	1	12	28.645	4.84	1.633e-20	5.1997e-18	up	NW_018744290.1	276041	279893	-	LOC110695058	--	K14638 solute carrier family 15 (peptide/histidine transporter), member 3/4 | (RefSeq) protein NRT1/ PTR FAMILY 8.3-like isoform X1 (A)	protein NRT1/ PTR FAMILY 8.3-like isoform X1 [Chenopodium quinoa]	RecName: Full=Protein NRT1/ PTR FAMILY 8.3; Short=AtNPF8.3; AltName: Full=Histidine-transporting protein; AltName: Full=Peptide transporter PTR2;	SubName: Full=Uncharacterized protein {ECO:0000313|EMBL:KNA06465.1};	H+/oligopeptide symporter	GO:0005794,Golgi apparatus; GO:0016021,integral component of membrane; GO:0000325,plant-type vacuole; GO:0009705,plant-type vacuole membrane; GO:0005774,vacuolar membrane; GO:0005773,vacuole; GO:0042936,NA; GO:0015334,high-affinity oligopeptide transmembrane transporter activity; GO:0015197,NA; GO:0042937,tripeptide transmembrane transporter activity; GO:0042938,dipeptide transport; GO:0015833,pe…	POT family
gene-LOC110695066	0.96	1.82	1.96	0.37	0.25	0.6	55	102	99	21	14	33	4.167	2.059	1.5484e-06	5.36508e-05	up	NW_018744290.1	351800	359839	-	LOC110695066	--	K03549 KUP system potassium uptake protein | (RefSeq) probable potassium transporter 17 isoform X1 (A)	probable potassium transporter 17 isoform X1 [Chenopodium quinoa]	RecName: Full=Probable potassium transporter 17; AltName: Full=OsHAK17;	RecName: Full=Potassium transporter {ECO:0000256|RuleBase:RU321113};	--	GO:0016021,integral component of membrane; GO:0016020,membrane; GO:0015079,potassium ion transmembrane transporter activity	K+ potassium transporter
gene-LOC110695068	4.55	10.03	4.2	0.69	0.72	0.98	371	802	302	55	57	77	8.233	3.041	2.28426e-15	3.42974e-13	up	NW_018744290.1	374393	396302	-	LOC110695068	--	K14726 solute carrier family 9 (sodium/hydrogen exchanger), member 10/11 | (RefSeq) probable sodium/hydrogen antiporter (A)	sodium/hydrogen exchanger 8-like [Chenopodium quinoa]	RecName: Full=Sodium/hydrogen exchanger 7; AltName: Full=Na(+)/H(+) exchanger 7; Short=NHE-7; AltName: Full=Protein SALT OVERLY SENSITIVE 1;	SubName: Full=Salt overly sensitive 1 {ECO:0000313|EMBL:ABS72166.1};	Sodium/hydrogen exchanger protein	GO:0009941,chloroplast envelope; GO:0016021,integral component of membrane; GO:0005886,plasma membrane; GO:0015386,potassium:proton antiporter activity; GO:0015385,sodium:proton antiporter activity; GO:0071805,potassium ion transmembrane transport; GO:0051453,regulation of intracellular pH; GO:2000377,regulation of reactive oxygen species metabolic process; GO:0042542,response to hydrogen peroxid…	Sodium/hydrogen exchanger family
gene-LOC110695081	4	0.19	5.99	0.33	0.16	1.31	234	11	309	19	9	74	6.962	2.799	0.00446497	0.0458871	up	NW_018744290.1	616136	623303	-	LOC110695081	--	K13254 spastin [EC:3.6.4.3] | (RefSeq) spastin-like (A)	ATPase family AAA domain-containing protein FIGL1-like [Chenopodium quinoa]	RecName: Full=ATPase family AAA domain-containing protein FIGL1 {ECO:0000305}; AltName: Full=AAA-ATPase FIDGETIN-LIKE 1 {ECO:0000303|PubMed:26161528}; EC=3.6.4.- {ECO:0000305};	SubName: Full=Uncharacterized protein {ECO:0000313|EMBL:KNA13972.1};	AAA+-type ATPase	GO:0005634,nucleus; GO:0005524,ATP binding; GO:0016787,hydrolase activity; GO:0006310,DNA recombination; GO:0006281,DNA repair; GO:0045128,negative regulation of reciprocal meiotic recombination; GO:0010569,regulation of double-strand break repair via homologous recombination	ATPase family associated with various cellular activities (AAA)
gene-LOC110695121	0.49	0	0.76	0	0	0	16	0	22	0	0	0	78.464	6.294	0.00377211	0.0407269	up	NW_018744290.1	985189	986806	+	LOC110695121	--	--	36.4 kDa proline-rich protein-like [Chenopodium quinoa]	RecName: Full=36.4 kDa proline-rich protein;	SubName: Full=Putative proline-rich cell wall protein {ECO:0000313|EMBL:ABR13301.1}; Flags: Fragment;	--	--	Hydrophobic seed protein
gene-LOC110695165	0.68	1.88	1.22	0.23	0.3	0.73	42	113	66	14	18	43	3.254	1.702	0.001199	0.0166428	up	NW_018744290.1	1398946	1402772	-	LOC110695165	--	--	--	--	--	--	--	--
gene-LOC110695180	1.93	2.12	1.99	0.08	0.05	0.1	78	84	71	3	2	4	28.386	4.827	2.42999e-15	3.63377e-13	up	NW_018744290.1	1535504	1538270	+	LOC110695180	--	K01051 pectinesterase [EC:3.1.1.11] | (RefSeq) pectinesterase-like (A)	probable pectinesterase/pectinesterase inhibitor 51 [Chenopodium quinoa]	RecName: Full=Probable pectinesterase/pectinesterase inhibitor 51; Includes: RecName: Full=Pectinesterase inhibitor 51; AltName: Full=Pectin methylesterase inhibitor 51; Includes: RecName: Full=Pectinesterase 51; Short=PE 51; EC=3.1.1.11; AltName: Full=Pectin methylesterase 51; Short=AtPME51; Flags: Precursor;	SubName: Full=Uncharacterized protein {ECO:0000313|EMBL:KNA11849.1};	--	GO:0071944,cell periphery; GO:0005618,cell wall; GO:0005576,extracellular region; GO:0045330,aspartyl esterase activity; GO:0030599,pectinesterase activity; GO:0046910,pectinesterase inhibitor activity; GO:0042545,cell wall modification; GO:0045490,pectin catabolic process	Pectinesterase
gene-LOC110695193	0.36	0.95	0.4	0.05	0.05	0	8	21	8	1	1	0	18.851	4.237	0.00186609	0.0235966	up	NW_018744290.1	1722086	1723187	+	LOC110695193	--	K19040 E3 ubiquitin-protein ligase ATL10/75/76/77/78 [EC:2.3.2.27] | (RefSeq) RING-H2 finger protein ATL78-like (A)	RING-H2 finger protein ATL78-like [Chenopodium quinoa]	RecName: Full=RING-H2 finger protein ATL78; EC=2.3.2.27 {ECO:0000305}; AltName: Full=RING-type E3 ubiquitin transferase ATL78 {ECO:0000305};	SubName: Full=Uncharacterized protein {ECO:0000313|EMBL:KNA25176.1};	FOG: Predicted E3 ubiquitin ligase	GO:0016021,integral component of membrane; GO:0046872,metal ion binding; GO:0061630,ubiquitin protein ligase activity; GO:0043161,proteasome-mediated ubiquitin-dependent protein catabolic process	Ring finger domain
gene-LOC110695195	3.39	4.79	1.48	0.38	0.85	0.62	91	126	35	10	22	16	5.407	2.435	5.77727e-05	0.00129405	up	NW_018744290.1	1738120	1739438	+	LOC110695195	--	K19040 E3 ubiquitin-protein ligase ATL10/75/76/77/78 [EC:2.3.2.27] | (RefSeq) RING-H2 finger protein ATL78-like (A)	RING-H2 finger protein ATL78-like [Chenopodium quinoa]	RecName: Full=RING-H2 finger protein ATL78; EC=2.3.2.27 {ECO:0000305}; AltName: Full=RING-type E3 ubiquitin transferase ATL78 {ECO:0000305};	SubName: Full=Uncharacterized protein {ECO:0000313|EMBL:KNA10083.1};	FOG: Predicted E3 ubiquitin ligase	GO:0016021,integral component of membrane; GO:0046872,metal ion binding; GO:0061630,ubiquitin protein ligase activity; GO:0043161,proteasome-mediated ubiquitin-dependent protein catabolic process	Ring finger domain
gene-LOC110695227	2.56	1.76	2.94	0.77	0.8	1.66	242	163	245	71	73	151	2.513	1.329	0.000343691	0.00599105	up	NW_018744290.1	2053006	2057644	+	LOC110695227	--	K13415 protein brassinosteroid insensitive 1 [EC:2.7.10.1 2.7.11.1] | (RefSeq) systemin receptor SR160-like (A)	systemin receptor SR160-like [Chenopodium quinoa]	RecName: Full=Systemin receptor SR160; EC=2.7.11.1; AltName: Full=Brassinosteroid LRR receptor kinase; Flags: Precursor;	SubName: Full=Uncharacterized protein {ECO:0000313|EMBL:KNA23893.1};	--	GO:0016021,integral component of membrane; GO:0005886,plasma membrane; GO:0005524,ATP binding; GO:0004674,protein serine/threonine kinase activity; GO:0005496,steroid binding; GO:0006952,defense response	Leucine rich repeat
gene-LOC110695244	0.64	0.74	0.72	0.05	0.12	0.27	27	31	27	2	5	11	5.297	2.405	0.000343142	0.00598691	up	NW_018744290.1	2232359	2238890	-	LOC110695244	--	K16075 magnesium transporter | (RefSeq) magnesium transporter MRS2-I-like (A)	magnesium transporter MRS2-I-like [Chenopodium quinoa]	RecName: Full=Magnesium transporter MRS2-I;	SubName: Full=Uncharacterized protein {ECO:0000313|EMBL:KNA14309.1}; Flags: Fragment;	Magnesium transporters: CorA family	GO:0016021,integral component of membrane; GO:0046873,metal ion transmembrane transporter activity	CorA-like Mg2+ transporter protein
gene-LOC110695254	24.19	16.39	8.83	3.12	6.25	2.16	743	493	239	94	185	64	4.324	2.112	0.000418197	0.00698937	up	NW_018744290.1	2323682	2325794	-	LOC110695254	--	K05894 12-oxophytodienoic acid reductase [EC:1.3.1.42] | (RefSeq) 12-oxophytodienoate reductase 3-like (A)	12-oxophytodienoate reductase 3-like [Chenopodium quinoa]	RecName: Full=12-oxophytodienoate reductase 3; EC=1.3.1.42; AltName: Full=12-oxophytodienoate-10,11-reductase 3; Short=OPDA-reductase 3; AltName: Full=LeOPR3;	SubName: Full=Uncharacterized protein {ECO:0000313|EMBL:KNA04621.1};	NADH:flavin oxidoreductase/12-oxophytodienoate reductase	GO:0005622,intracellular; GO:0005777,peroxisome; GO:0016629,12-oxophytodienoate reductase activity; GO:0010181,FMN binding; GO:0042802,identical protein binding; GO:0009695,jasmonic acid biosynthetic process; GO:0055114,oxidation-reduction process; GO:0031408,oxylipin biosynthetic process	NADH:flavin oxidoreductase / NADH oxidase family
gene-LOC110695320	1.7	2.09	1.84	0.79	0.76	0.96	44	53	42	20	19	24	2.386	1.254	0.00179441	0.0228336	up	NW_018744290.1	1271553	1272824	+	LOC110695320	--	K10260 F-box and WD-40 domain protein 7 | (RefSeq) WD40/YVTN repeat-like-containing domain (A)	U-box domain-containing protein 26-like [Chenopodium quinoa]	RecName: Full=U-box domain-containing protein 26; EC=2.3.2.27; AltName: Full=Plant U-box protein 26; AltName: Full=RING-type E3 ubiquitin transferase PUB26 {ECO:0000305};	RecName: Full=RING-type E3 ubiquitin transferase {ECO:0000256|SAAS:SAAS00702733}; EC=2.3.2.27 {ECO:0000256|SAAS:SAAS00702733};	--	GO:0004842,ubiquitin-protein transferase activity	U-box domain
gene-LOC110695360	1.09	0.53	0.3	0.09	0	0.09	25	12	6	2	0	2	12.291	3.62	0.00243983	0.0290701	up	NW_018744290.1	1483857	1484985	-	LOC110695360	--	--	vegetative cell wall protein gp1-like [Chenopodium quinoa]	--	SubName: Full=Uncharacterized protein {ECO:0000313|EMBL:KNA08087.1};	--	GO:0016021,integral component of membrane	--
gene-LOC110695430	13.41	8.79	7.05	1.14	1.43	2.02	682	438	316	57	70	99	7.025	2.812	6.78026e-13	7.40934e-11	up	NW_018744298.1	49062	54119	+	LOC110695430	--	--	--	--	--	--	--	--
gene-LOC110695432	2.11	2.96	3.07	0	0	0	32	44	41	0	0	0	227.668	7.831	1.81611e-09	1.12361e-07	up	NW_018744298.1	304554	308140	+	LOC110695432	--	--	uncharacterized protein LOC110695432 [Chenopodium quinoa]	--	SubName: Full=Uncharacterized protein {ECO:0000313|EMBL:KNA08153.1};	--	--	--
gene-LOC110695509	0.98	1.19	1.03	0.25	0.23	0.11	63	75	58	16	14	7	5.518	2.464	1.59387e-06	5.48427e-05	up	NW_018744301.1	2047656	2054684	-	LOC110695509	--	K15042 importin subunit alpha-6/7 | (RefSeq) importin subunit alpha-4-like (A)	uncharacterized protein LOC110695509 [Chenopodium quinoa]	--	SubName: Full=Uncharacterized protein {ECO:0000313|EMBL:OMO51093.1};	--	--	--
gene-LOC110695540	3.12	5.67	4	0	0	0	137	244	155	0	0	0	1030.08	10.009	5.10803e-16	8.53711e-14	up	NW_018744301.1	5491711	5495269	-	LOC110695540	--	--	--	--	--	--	--	--
gene-LOC110695541	0.41	0.94	0.99	0.08	0.13	0.06	30	67	64	6	9	4	8.749	3.129	9.18539e-07	3.38594e-05	up	NW_018744301.1	5713958	5718981	-	LOC110695541	--	--	--	--	--	--	--	--
gene-LOC110695595	6.13	2.96	4.7	0	0	0	74	35	50	0	0	0	317.769	8.312	4.38434e-10	3.07871e-08	up	NW_018744301.1	3755126	3756006	-	LOC110695595	--	--	--	--	--	--	--	--
gene-LOC110695599	0.34	0.76	1.22	0	0	0	5	11	16	0	0	0	62.421	5.964	0.00026575	0.00482821	up	NW_018744301.1	5481369	5483131	-	LOC110695599	--	--	--	--	--	--	--	--
gene-LOC110695711	0.55	1.2	0.41	0	0	0	21	45	14	0	0	0	151.355	7.242	3.67409e-07	1.48151e-05	up	NW_018742358.1	41837	45585	+	LOC110695711	--	K23810 (E)-8-carboxylinalool synthase [EC:1.14.14.-] | (RefSeq) geraniol 8-hydroxylase (A)	cytochrome P450 76AD1-like [Chenopodium quinoa]	RecName: Full=Geraniol 8-hydroxylase; EC=1.14.13.152; AltName: Full=Cytochrome P450 76B6; AltName: Full=Geraniol 10-hydroxylase; Short=CrG10H;	SubName: Full=CYP76 {ECO:0000313|EMBL:ALT04746.1};	Cytochrome P450 CYP2 subfamily	GO:0005789,endoplasmic reticulum membrane; GO:0016021,integral component of membrane; GO:0102811,geraniol 10-hydroxylase activity; GO:0020037,heme binding; GO:0005506,iron ion binding; GO:0016709,oxidoreductase activity, acting on paired donors, with incorporation or reduction of molecular oxygen, NAD(P)H as one donor, and incorporation of one atom of oxygen; GO:0016099,monoterpenoid biosynthetic…	Cytochrome P450
gene-LOC110695718	2.84	3.37	2.31	1.43	0.58	0.8	81	94	58	40	16	22	3.2	1.678	0.000380489	0.00650034	up	NW_018742358.1	56132	58847	+	LOC110695718	--	--	cucumber peeling cupredoxin-like [Chenopodium quinoa]	--	SubName: Full=Uncharacterized protein {ECO:0000313|EMBL:KNA17437.1};	--	GO:0016021,integral component of membrane; GO:0009055,electron transfer activity	Plastocyanin-like domain
gene-LOC110695746	0.39	0.57	0.76	0.02	0.13	0.23	21	30	36	1	7	12	4.862	2.281	0.0028482	0.0328754	up	NW_018744304.1	6062813	6066399	-	LOC110695746	--	K20177 vacuolar protein sorting-associated protein 3 | (RefSeq) transforming growth factor-beta receptor-associated protein 1-like (A)	uncharacterized protein LOC110695746 [Chenopodium quinoa]	--	SubName: Full=Uncharacterized protein {ECO:0000313|EMBL:KNA10259.1}; Flags: Fragment;	Vacuolar assembly/sorting proteins VPS39/VAM6/VPS3	GO:0005622,intracellular; GO:0006886,intracellular protein transport; GO:0016192,vesicle-mediated transport	--
gene-LOC110695777	33.49	25.01	26.9	10.88	10.42	13.41	1064	778	753	339	319	411	2.657	1.41	2.18397e-07	9.20859e-06	up	NW_018744304.1	7137048	7150818	+	LOC110695777	--	K01623 fructose-bisphosphate aldolase, class I [EC:4.1.2.13] | (RefSeq) fructose-bisphosphate aldolase 3, chloroplastic-like (A)	fructose-bisphosphate aldolase 3, chloroplastic-like [Chenopodium quinoa]	RecName: Full=Fructose-bisphosphate aldolase 3, chloroplastic {ECO:0000305}; Short=AtFBA3 {ECO:0000303|PubMed:22561114}; EC=4.1.2.13 {ECO:0000305}; AltName: Full=Protein PIGMENT DEFECTIVE 345; Flags: Precursor;	RecName: Full=Fructose-bisphosphate aldolase {ECO:0000256|RuleBase:RU003994, ECO:0000256|SAAS:SAAS00336718}; EC=4.1.2.13 {ECO:0000256|RuleBase:RU003994, ECO:0000256|SAAS:SAAS00336718};	Fructose-biphosphate aldolase	GO:0009507,chloroplast; GO:0009570,chloroplast stroma; GO:0009534,chloroplast thylakoid; GO:0005739,mitochondrion; GO:0009536,plastid; GO:0010287,plastoglobule; GO:0004332,fructose-bisphosphate aldolase activity; GO:0006094,gluconeogenesis; GO:0006096,glycolytic process; GO:0046686,response to cadmium ion; GO:0006979,response to oxidative stress	Fructose-bisphosphate aldolase class-I
gene-LOC110695779	3.19	6.79	4.68	1.23	0.75	1.63	124	258	160	47	28	61	4.341	2.118	4.41201e-09	2.57851e-07	up	NW_018744304.1	7133929	7136753	-	LOC110695779	--	K23222 nuclease HARBI1 [EC:3.1.-.-] | (RefSeq) uncharacterized protein LOC111367135 isoform X1 (A)	uncharacterized protein LOC110695779 [Chenopodium quinoa]	--	SubName: Full=Uncharacterized protein {ECO:0000313|EMBL:KNA03300.1};	Predicted transposase	GO:0016021,integral component of membrane	--
gene-LOC110695871	0.24	0.36	0.34	0.12	0.1	0.15	25	37	32	12	10	15	2.76	1.464	0.00310741	0.035078	up	NW_018742359.1	422709	440723	+	LOC110695871	--	--	--	--	--	--	--	--
gene-LOC110695879	1.67	1.09	4.19	0	0.03	0.09	58	37	128	0	1	3	64.351	6.008	1.92623e-09	1.18777e-07	up	NW_018744311.1	156746	159799	+	LOC110695879	--	--	--	--	--	--	--	--
gene-LOC110695882	4.49	6.22	6.4	2.5	1.65	3.85	110	149	138	60	39	91	2.327	1.218	9.64172e-05	0.00203153	up	NW_018744311.1	161553	167301	+	LOC110695882	--	K02356 elongation factor P | (RefSeq) hypothetical protein (A)	uncharacterized protein LOC110695882 [Chenopodium quinoa]	--	SubName: Full=Uncharacterized protein {ECO:0000313|EMBL:KNA16828.1}; Flags: Fragment;	--	GO:0005737,cytoplasm; GO:0003746,translation elongation factor activity	Elongation factor P (EF-P) OB domain
gene-LOC110695946	2.65	2.81	2.89	1.12	0.97	1.61	154	160	148	64	54	90	2.445	1.29	8.34818e-07	3.10522e-05	up	NW_018744311.1	659518	669050	+	LOC110695946	--	K11684 bromodomain-containing factor 1 | (RefSeq) transcription factor GTE4 (A)	DNA ligase 1-like [Chenopodium quinoa]	RecName: Full=Transcription factor GTE9; AltName: Full=BROMODOMAIN AND EXTRATERMINAL DOMAIN PROTEIN 9; Short=AtBET9; AltName: Full=Bromodomain-containing protein GTE9; AltName: Full=Protein GLOBAL TRANSCRIPTION FACTOR GROUP E9;	SubName: Full=Uncharacterized protein {ECO:0000313|EMBL:KNA25163.1};	--	GO:0005634,nucleus; GO:0006355,regulation of transcription, DNA-templated; GO:0006351,transcription, DNA-templated	Bromodomain
gene-LOC110695967	2.65	2.32	3.83	0.35	0.48	0.74	207	178	264	27	36	56	6.079	2.604	2.37592e-12	2.34644e-10	up	NW_018744311.1	728744	799920	+	LOC110695967	--	K01188 beta-glucosidase [EC:3.2.1.21] | (RefSeq) beta-glucosidase 13-like (A)	beta-glucosidase 24-like isoform X1 [Chenopodium quinoa]	RecName: Full=Beta-glucosidase 24; Short=Os6bglu24; EC=3.2.1.21; Flags: Precursor;	SubName: Full=Uncharacterized protein {ECO:0000313|EMBL:KNA25155.1};	Beta-glucosidase, lactase phlorizinhydrolase, and related proteins	GO:0008422,beta-glucosidase activity; GO:0102483,scopolin beta-glucosidase activity; GO:0005975,carbohydrate metabolic process; GO:1901657,glycosyl compound metabolic process	Glycosyl hydrolase family 1
gene-LOC110695972	13.21	9.66	13.96	7.2	5.29	7.05	781	559	727	417	301	402	2.026	1.019	0.000414789	0.00694717	up	NW_018742359.1	1702160	1707539	-	LOC110695972	--	K01102 pyruvate dehydrogenase phosphatase [EC:3.1.3.43] | (RefSeq) putative protein phosphatase 2C 46 (A)	probable protein phosphatase 2C 40 isoform X1 [Chenopodium quinoa]	RecName: Full=Probable protein phosphatase 2C 40; Short=AtPP2C40; EC=3.1.3.16; AltName: Full=Protein phosphatase 2C homolog 1;	SubName: Full=Uncharacterized protein {ECO:0000313|EMBL:KNA10919.1};	Protein phosphatase 2C/pyruvate dehydrogenase (lipoamide) phosphatase	GO:0046872,metal ion binding; GO:0004722,protein serine/threonine phosphatase activity	Protein phosphatase 2C
gene-LOC110695976	38.26	73.36	14.81	0.94	7.95	4.28	2372	4454	809	57	475	256	9.469	3.243	1.5297e-05	0.000407477	up	NW_018744311.1	903012	908944	-	LOC110695976	--	K00454 lipoxygenase [EC:1.13.11.12] | (RefSeq) linoleate 13S-lipoxygenase 2-1, chloroplastic-like (A)	linoleate 13S-lipoxygenase 2-1, chloroplastic-like [Chenopodium quinoa]	RecName: Full=Linoleate 13S-lipoxygenase 2-1, chloroplastic; EC=1.13.11.12; AltName: Full=Lipoxygenase 2-1; Flags: Precursor;	RecName: Full=Lipoxygenase {ECO:0000256|RuleBase:RU003975}; EC=1.13.11.- {ECO:0000256|RuleBase:RU003975};	--	GO:0009570,chloroplast stroma; GO:0009534,chloroplast thylakoid; GO:0016165,linoleate 13S-lipoxygenase activity; GO:0046872,metal ion binding; GO:0010597,green leaf volatile biosynthetic process; GO:0031408,oxylipin biosynthetic process	Lipoxygenase
gene-LOC110695992	1.69	2.32	1.89	0.59	1.09	1.32	108	145	106	37	67	81	2.09	1.063	0.00411897	0.0433072	up	NW_018744311.1	1187737	1193838	-	LOC110695992	--	K09955 uncharacterized protein | (RefSeq) uncharacterized protein LOC110695992 (A)	uncharacterized protein LOC110695992 [Chenopodium quinoa]	--	SubName: Full=Uncharacterized protein {ECO:0000313|EMBL:KMS97484.1};	--	GO:0003824,catalytic activity	Beta-L-arabinofuranosidase, GH127
gene-LOC110695995	1.72	5.43	3.74	0.27	0.43	1.79	58	179	111	9	14	58	4.949	2.307	0.000398717	0.00675241	up	NW_018744311.1	1214050	1215700	-	LOC110695995	--	K08286 protein-serine/threonine kinase [EC:2.7.11.-] | (RefSeq) serine/threonine-protein kinase UCNL-like (A)	serine/threonine-protein kinase UCNL-like [Chenopodium quinoa]	RecName: Full=Serine/threonine-protein kinase UCNL {ECO:0000305}; EC=2.7.11.1 {ECO:0000250|UniProtKB:Q9SYB9}; AltName: Full=AGC serine/threonine-protein kinase subfamily 2 member 4 {ECO:0000303|PubMed:13678909}; AltName: Full=Protein UNICORN-LIKE {ECO:0000303|PubMed:22927420};	SubName: Full=Uncharacterized protein {ECO:0000313|EMBL:KNA03724.1};	Putative serine/threonine protein kinase	GO:0005737,cytoplasm; GO:0005634,nucleus; GO:0005886,plasma membrane; GO:0005524,ATP binding; GO:0016301,kinase activity; GO:0004674,protein serine/threonine kinase activity; GO:0035556,intracellular signal transduction	Protein kinase domain
gene-LOC110696094	9.99	9.79	9.16	0.09	0.09	0.14	223	214	180	2	2	3	96.59	6.594	7.37642e-26	4.12811e-23	up	NW_018742359.1	2991420	2995593	-	LOC110696094	--	K14490 histidine-containing phosphotransfer peotein | (RefSeq) LOW QUALITY PROTEIN: histidine-containing phosphotransfer protein 1-like (A)	LOW QUALITY PROTEIN: histidine-containing phosphotransfer protein 1-like [Chenopodium quinoa]	RecName: Full=Histidine-containing phosphotransfer protein 5;	SubName: Full=Signal transduction histidine kinase, phosphotransfer (Hpt) domain-containing protein {ECO:0000313|EMBL:KVI07359.1};	Two-component phosphorelay intermediate involved in MAP kinase cascade regulation	GO:0005737,cytoplasm; GO:0005829,cytosol; GO:0005634,nucleus; GO:0009927,histidine phosphotransfer kinase activity; GO:0043424,protein histidine kinase binding; GO:0009557,antipodal cell differentiation; GO:0009736,cytokinin-activated signaling pathway; GO:0009560,embryo sac egg cell differentiation; GO:0000160,phosphorelay signal transduction system	Hpt domain
gene-LOC110696095	0.08	4.86	1.1	0.16	0.08	0.04	2	123	25	4	2	1	20.672	4.37	0.000436307	0.00726248	up	NW_018744311.1	2457219	2459452	+	LOC110696095	--	--	bark storage protein A-like [Chenopodium quinoa]	RecName: Full=Bark storage protein A; Flags: Precursor;	SubName: Full=Uncharacterized protein {ECO:0000313|EMBL:OWM75746.1};	--	GO:0003824,catalytic activity; GO:0045735,nutrient reservoir activity; GO:0009116,nucleoside metabolic process	Phosphorylase superfamily
gene-LOC110696111	0.11	0.38	0.08	0	0	0.02	6	21	4	0	0	1	29.576	4.886	0.00308642	0.0349372	up	NW_018744311.1	2668141	2671319	+	LOC110696111	--	K15030 translation initiation factor 3 subunit M | (RefSeq) uncharacterized protein LOC106426879 isoform X2 (A)	F-box/kelch-repeat protein At3g23880-like isoform X1 [Chenopodium quinoa]	RecName: Full=F-box protein CPR1; AltName: Full=Protein CONSTITUTIVE EXPRESSER OF PR GENES 1; AltName: Full=Protein CONSTITUTIVE EXPRESSER OF PR GENES 30 {ECO:0000303|PubMed:19682297};	SubName: Full=Fgenesh protein 115 {ECO:0000313|EMBL:ABD83326.1};	--	GO:0005737,cytoplasm; GO:0005634,nucleus; GO:0004842,ubiquitin-protein transferase activity; GO:0031348,negative regulation of defense response; GO:0042177,negative regulation of protein catabolic process; GO:0009626,plant-type hypersensitive response; GO:0031146,SCF-dependent proteasomal ubiquitin-dependent protein catabolic process	F-box-like
gene-LOC110696115	18.6	17.48	16.8	6.44	3.83	7.9	539	496	429	183	107	221	3.191	1.674	3.8221e-10	2.6993e-08	up	NW_018744311.1	2713468	2716989	-	LOC110696115	--	K03539 ribonuclease P/MRP protein subunit RPP1 [EC:3.1.26.5] | (RefSeq) uncharacterized LOC105046161 (A)	putative zinc finger protein CONSTANS-LIKE 11 [Chenopodium quinoa]	RecName: Full=Zinc finger protein CO3 {ECO:0000305}; AltName: Full=Protein CONSTANS-like CO3; Short=OsCO3 {ECO:0000303|PubMed:18449564};	SubName: Full=Uncharacterized protein {ECO:0000313|EMBL:KNA17082.1};	--	GO:0005634,nucleus; GO:0003677,DNA binding; GO:0008270,zinc ion binding; GO:0009908,flower development; GO:0048577,negative regulation of short-day photoperiodism, flowering; GO:0009909,regulation of flower development; GO:0006355,regulation of transcription, DNA-templated; GO:0006351,transcription, DNA-templated	CCT motif
gene-LOC110696234	3.46	0.4	3.63	0.26	0	0.29	160	18	148	12	0	13	15.964	3.997	7.97364e-05	0.00172144	up	NW_018744315.1	60238	66079	+	LOC110696234	--	K00029 malate dehydrogenase (oxaloacetate-decarboxylating)(NADP+) [EC:1.1.1.40] | (RefSeq) NADP-dependent malic enzyme-like (A)	NADP-dependent malic enzyme-like [Chenopodium quinoa]	RecName: Full=NADP-dependent malic enzyme; Short=NADP-ME; EC=1.1.1.40;	RecName: Full=Malic enzyme {ECO:0000256|RuleBase:RU003426};	NADP+-dependent malic enzyme	GO:0005737,cytoplasm; GO:0004471,malate dehydrogenase (decarboxylating) (NAD+) activity; GO:0004473,malate dehydrogenase (decarboxylating) (NADP+) activity; GO:0046872,metal ion binding; GO:0051287,NAD binding; GO:0008948,oxaloacetate decarboxylase activity	Malic enzyme, NAD binding domain
gene-LOC110696236	3.63	0.01	3.04	0	0	0	279	1	206	0	0	0	1007.83	9.977	0.000391562	0.00665983	up	NW_018744315.1	71643	77329	+	LOC110696236	--	K00924 kinase [EC:2.7.1.-] | (RefSeq) receptor protein kinase TMK1 (A)	receptor protein kinase TMK1-like [Chenopodium quinoa]	RecName: Full=Receptor protein kinase TMK1 {ECO:0000303|PubMed:1332795}; EC=2.7.11.1 {ECO:0000269|PubMed:1332795}; AltName: Full=BARK1-like kinase 1 {ECO:0000303|PubMed:23921992}; AltName: Full=Transmembrane kinase 1 {ECO:0000303|PubMed:1332795}; Flags: Precursor;	SubName: Full=Uncharacterized protein {ECO:0000313|EMBL:KNA14435.1};	--	GO:0005576,extracellular region; GO:0016021,integral component of membrane; GO:0005886,plasma membrane; GO:0005524,ATP binding; GO:0004675,transmembrane receptor protein serine/threonine kinase activity; GO:0007165,signal transduction	Protein tyrosine kinase
gene-LOC110696250	0.27	0.24	0.48	0	0	0	7	6	11	0	0	0	47.558	5.572	0.000964559	0.0139168	up	NW_018744329.1	15451	17152	-	LOC110696250	--	K14638 solute carrier family 15 (peptide/histidine transporter), member 3/4 | (RefSeq) protein NRT1/ PTR FAMILY 1.1-like (A)	protein NRT1/ PTR FAMILY 1.1-like [Chenopodium quinoa]	RecName: Full=Protein NRT1/ PTR FAMILY 1.1; Short=AtNPF1.1; AltName: Full=Nitrate transporter 1.12;	SubName: Full=Uncharacterized protein {ECO:0000313|EMBL:KNA16733.1};	H+/oligopeptide symporter	GO:0016021,integral component of membrane; GO:0005886,plasma membrane; GO:0080054,low-affinity nitrate transmembrane transporter activity; GO:0015706,nitrate transport	POT family
gene-LOC110696356	0.15	0.28	0.25	0.05	0.02	0	9	16	13	3	1	0	9.865	3.302	0.00380538	0.0409425	up	NW_018744353.1	7753	14455	+	LOC110696356	--	K19199 histone-lysine N-methyltransferase SETD3 [EC:2.1.1.43] | (RefSeq) uncharacterized protein LOC110684701 (A)	uncharacterized protein LOC110696356 isoform X1 [Chenopodium quinoa]	--	SubName: Full=Uncharacterized protein {ECO:0000313|EMBL:KMS96342.1};	--	--	Plant mobile domain
gene-LOC110696414	3.64	16.98	6.55	0.1	0	0.3	75	343	119	2	0	6	73.866	6.207	7.29427e-14	9.01074e-12	up	NW_018744366.1	18986	26515	+	LOC110696414	--	--	--	--	--	--	--	--
gene-LOC110696458	0.09	0.28	0.13	0	0	0	5	15	6	0	0	0	49.053	5.616	0.00100179	0.014392	up	NW_018742364.1	15701	18516	-	LOC110696458	--	--	uncharacterized protein LOC110696458 [Chenopodium quinoa]	RecName: Full=Protein NLP2 {ECO:0000303|PubMed:15785851}; Short=OsNLP2 {ECO:0000303|PubMed:15785851}; AltName: Full=NIN-like protein 2 {ECO:0000303|PubMed:15785851}; AltName: Full=Nodule inception protein-like protein 2 {ECO:0000303|PubMed:15785851};	SubName: Full=Uncharacterized protein {ECO:0000313|EMBL:KNA22025.1};	--	GO:0005634,nucleus; GO:0003677,DNA binding; GO:0006355,regulation of transcription, DNA-templated; GO:0006351,transcription, DNA-templated	PB1 domain
gene-LOC110696461	2.3	0.28	4.7	0.09	0.02	0.06	210	25	379	8	2	5	47.197	5.561	1.36247e-09	8.73467e-08	up	NW_018744367.1	192745	199693	-	LOC110696461	--	K14568 rRNA small subunit pseudouridine methyltransferase Nep1 [EC:2.1.1.260] | (RefSeq) ribosomal RNA small subunit methyltransferase NEP1-like (A)	ribosomal RNA small subunit methyltransferase NEP1-like [Chenopodium quinoa]	--	SubName: Full=Uncharacterized protein {ECO:0000313|EMBL:KNA06836.1};	Protein required for 18S rRNA maturation and 40S ribosome biogenesis	GO:0008168,methyltransferase activity	EMG1/NEP1 methyltransferase
gene-LOC110696467	0.63	0.41	0.25	0	0	0	34	22	12	0	0	0	133.913	7.065	1.09591e-06	3.92236e-05	up	NW_018742364.1	33791	36605	-	LOC110696467	--	--	uncharacterized protein LOC110696458 [Chenopodium quinoa]	RecName: Full=Protein NLP2 {ECO:0000303|PubMed:15785851}; Short=OsNLP2 {ECO:0000303|PubMed:15785851}; AltName: Full=NIN-like protein 2 {ECO:0000303|PubMed:15785851}; AltName: Full=Nodule inception protein-like protein 2 {ECO:0000303|PubMed:15785851};	SubName: Full=Uncharacterized protein {ECO:0000313|EMBL:KNA22025.1};	--	GO:0005634,nucleus; GO:0003677,DNA binding; GO:0006355,regulation of transcription, DNA-templated; GO:0006351,transcription, DNA-templated	PB1 domain
gene-LOC110696490	0.32	0.48	0.58	0	0	0	25	37	40	0	0	0	198.753	7.635	9.2176e-09	5.05886e-07	up	NW_018744367.1	996647	1001379	+	LOC110696490	--	--	--	--	--	--	--	--
gene-LOC110696492	1.17	2.25	1.85	0.01	0.01	0.01	120	225	167	1	1	1	183.454	7.519	1.30692e-16	2.3663e-14	up	NW_018744367.1	1052591	1057801	+	LOC110696492	--	--	--	--	--	--	--	--
gene-LOC110696500	1.46	0.8	1.19	0.19	0.22	0.22	56	30	40	7	8	8	6.007	2.587	1.28468e-05	0.000349932	up	NW_018744367.1	1265366	1273968	+	LOC110696500	--	K01285 lysosomal Pro-X carboxypeptidase [EC:3.4.16.2] | (RefSeq) lysosomal Pro-X carboxypeptidase-like isoform X1 (A)	lysosomal Pro-X carboxypeptidase-like isoform X1 [Chenopodium quinoa]	RecName: Full=Probable serine protease EDA2; EC=3.4.-.-; AltName: Full=Protein EMBRYO SAC DEVELOPMENT ARREST 2; Flags: Precursor;	SubName: Full=Uncharacterized protein {ECO:0000313|EMBL:KNA15013.1}; Flags: Fragment;	Prolylcarboxypeptidase (angiotensinase C)	GO:0005576,extracellular region; GO:0008239,dipeptidyl-peptidase activity; GO:0008236,serine-type peptidase activity; GO:0009561,megagametogenesis; GO:0006508,proteolysis	Serine carboxypeptidase S28
gene-LOC110696604	0.93	0.28	0.43	0.08	0.13	0.03	37	11	15	3	5	1	7.355	2.879	0.00319691	0.0358691	up	NW_018744367.1	6010427	6014700	-	LOC110696604	--	K07297 adiponectin receptor | (RefSeq) heptahelical transmembrane protein 4-like (A)	heptahelical transmembrane protein 4-like [Chenopodium quinoa]	RecName: Full=Heptahelical transmembrane protein 4; AltName: Full=PAQR family protein HHP4;	SubName: Full=Uncharacterized protein {ECO:0000313|EMBL:KNA12479.1};	Predicted membrane proteins, contain hemolysin III domain	GO:0016021,integral component of membrane; GO:0004872,NA; GO:0009725,response to hormone; GO:0009744,response to sucrose	Haemolysin-III related
gene-LOC110696654	1.71	1.7	1.74	0.14	0	0.05	38	37	34	3	0	1	29.872	4.901	8.16238e-08	3.74517e-06	up	NW_018744367.1	9624717	9627286	+	LOC110696654	--	K01110 phosphatidylinositol-3,4,5-trisphosphate 3-phosphatase and dual-specificity protein phosphatase PTEN [EC:3.1.3.16 3.1.3.48 3.1.3.67] | (RefSeq) phosphatidylinositol 3,4,5-trisphosphate 3-phosphatase and protein-tyrosine-phosphatase PTEN2A-like (A)	phosphatidylinositol 3,4,5-trisphosphate 3-phosphatase and protein-tyrosine-phosphatase PTEN2A-like [Chenopodium quinoa]	RecName: Full=Phosphatidylinositol 3,4,5-trisphosphate 3-phosphatase and protein-tyrosine-phosphatase PTEN2A {ECO:0000305}; EC=3.1.3.48 {ECO:0000255|PROSITE-ProRule:PRU10044, ECO:0000269|PubMed:21864294}; EC=3.1.3.67 {ECO:0000269|PubMed:21864294}; AltName: Full=Protein PHOSPHATASE AND TENSIN HOMOLOG 2-a {ECO:0000303|PubMed:21864294}; Short=AtPTEN2 {ECO:0000303|PubMed:12368500}; Short=AtPTEN2a {EC…	SubName: Full=Uncharacterized protein {ECO:0000313|EMBL:KNA04361.1};	Clathrin coat dissociation kinase GAK/PTEN/Auxilin and related tyrosine phosphatases	GO:0005829,cytosol; GO:0070300,phosphatidic acid binding; GO:0052866,phosphatidylinositol phosphate phosphatase activity; GO:0016314,phosphatidylinositol-3,4,5-trisphosphate 3-phosphatase activity; GO:0004725,protein tyrosine phosphatase activity; GO:0008138,protein tyrosine/serine/threonine phosphatase activity; GO:0035335,peptidyl-tyrosine dephosphorylation; GO:0046856,phosphatidylinositol deph…	C2 domain of PTEN tumour-suppressor protein
gene-LOC110696692	0.03	0.01	0.44	0	0	0	2	1	30	0	0	0	67.341	6.073	0.00379919	0.0408878	up	NW_018742372.1	453993	458873	-	LOC110696692	--	K13181 ATP-dependent RNA helicase DDX27 [EC:3.6.4.13] | (RefSeq) DEAD-box ATP-dependent RNA helicase 28-like (A)	uncharacterized protein LOC110696692 [Chenopodium quinoa]	--	--	--	--	--
gene-LOC110696871	18.05	18.22	24.27	3.34	3.22	3.7	2025	2002	2399	367	348	401	6.232	2.64	9.66877e-29	7.00246e-26	up	NW_018744394.1	602817	638591	-	LOC110696871	--	K05665 ATP-binding cassette, subfamily C (CFTR/MRP), member 1 [EC:7.6.2.3] | (RefSeq) ABC transporter C family member 2-like (A)	ABC transporter C family member 2-like [Chenopodium quinoa]	RecName: Full=ABC transporter C family member 2; Short=ABC transporter ABCC.2; Short=AtABCC2; EC=3.6.3.44; AltName: Full=ATP-energized glutathione S-conjugate pump 2; AltName: Full=Glutathione S-conjugate-transporting ATPase 2; AltName: Full=Multidrug resistance-associated protein 2;	SubName: Full=Uncharacterized protein {ECO:0000313|EMBL:KNA13624.1};	Multidrug resistance-associated protein/mitoxantrone resistance protein, ABC superfamily	GO:0016021,integral component of membrane; GO:0000325,plant-type vacuole; GO:0005774,vacuolar membrane; GO:0005773,vacuole; GO:1902417,(+)-abscisic acid D-glucopyranosyl ester transmembrane transporter activity; GO:0005524,ATP binding; GO:0042626,ATPase activity, coupled to transmembrane movement of substances; GO:0005516,calmodulin binding; GO:0008559,xenobiotic transmembrane transporting ATPase…	ABC transporter transmembrane region
gene-LOC110696918	20.64	11.77	21.31	0.06	0	0	376	210	342	1	0	0	951.165	9.894	2.86953e-15	4.18928e-13	up	NW_018744420.1	115926	117830	+	LOC110696918	--	--	--	--	--	--	--	--
gene-LOC110696985	3.49	0.04	6.89	0.02	0	0	185	2	322	1	0	0	539.509	9.076	5.87876e-05	0.00131519	up	NW_018744445.1	170478	177641	+	LOC110696985	--	--	putative leucine-rich repeat-containing protein DDB_G0290503 isoform X2 [Chenopodium quinoa]	--	SubName: Full=Uncharacterized protein {ECO:0000313|EMBL:KNA04462.1};	--	--	--
gene-LOC110697035	3.11	3.22	3.37	1.22	1.43	1.58	86	87	82	33	38	42	2.438	1.286	0.000134191	0.0026996	up	NW_018744460.1	65744	67098	-	LOC110697035	--	K13496 UDP-glucosyl transferase 73C [EC:2.4.1.-] | (RefSeq) scopoletin glucosyltransferase (A)	uncharacterized protein LOC110697035 [Chenopodium quinoa]	--	SubName: Full=Uncharacterized protein {ECO:0000313|EMBL:KNA24299.1};	--	GO:0016021,integral component of membrane	--
gene-LOC110697083	14.14	6.91	4.66	2.63	1.8	2.4	537	257	156	98	66	88	4.153	2.054	4.50596e-05	0.00104806	up	NW_018744460.1	700204	702175	+	LOC110697083	--	K09419 heat shock transcription factor, other eukaryote | (RefSeq) heat stress transcription factor B-2a-like (A)	heat stress transcription factor B-2a-like [Chenopodium quinoa]	RecName: Full=Heat stress transcription factor B-2a; Short=AtHsfB2a; AltName: Full=AtHsf-22; AltName: Full=Heat shock factor protein 6; Short=HSF 6; AltName: Full=Heat shock transcription factor 6; Short=HSTF 6;	SubName: Full=Uncharacterized protein {ECO:0000313|EMBL:KNA17086.1};	Heat shock transcription factor	GO:0005634,nucleus; GO:0003700,DNA-binding transcription factor activity; GO:0043565,sequence-specific DNA binding; GO:0010200,response to chitin; GO:0006351,transcription, DNA-templated	HSF-type DNA-binding
gene-LOC110697090	2.92	3.4	2.21	0	0	0	57	65	38	0	0	0	310.453	8.278	1.3057e-10	1.00683e-08	up	NW_018744460.1	768647	770994	+	LOC110697090	--	--	uncharacterized protein C6G9.01c-like [Chenopodium quinoa]	--	SubName: Full=Uncharacterized protein {ECO:0000313|EMBL:KNA21150.1};	--	--	Eukaryotic protein of unknown function (DUF1764)
gene-LOC110697132	6.75	8.8	6.89	1.67	1.23	5.63	347	443	312	84	61	279	3.052	1.61	0.000471065	0.00776059	up	NW_018744460.1	1253398	1257347	+	LOC110697132	--	K00108 choline dehydrogenase [EC:1.1.99.1] | (RefSeq) protein HOTHEAD-like (A)	protein HOTHEAD-like [Chenopodium quinoa]	RecName: Full=Protein HOTHEAD; AltName: Full=Protein ADHESION OF CALYX EDGES; Flags: Precursor;	SubName: Full=Uncharacterized protein {ECO:0000313|EMBL:KNA11618.1};	Glucose dehydrogenase/choline dehydrogenase/mandelonitrile lyase (GMC oxidoreductase family)	GO:0005576,extracellular region; GO:0050660,flavin adenine dinucleotide binding; GO:0046593,mandelonitrile lyase activity; GO:0016614,oxidoreductase activity, acting on CH-OH group of donors; GO:0007267,cell-cell signaling; GO:0009553,embryo sac development; GO:0010430,fatty acid omega-oxidation	GMC oxidoreductase
gene-LOC110697158	2.78	5.97	3.49	1.68	0.75	1.44	96	202	106	57	25	48	3.332	1.737	3.29529e-05	0.000794484	up	NW_018744460.1	1522199	1524267	+	LOC110697158	--	K01206 alpha-L-fucosidase [EC:3.2.1.51] | (RefSeq) alpha-L-fucosidase 1-like (A)	alpha-L-fucosidase 1-like [Chenopodium quinoa]	RecName: Full=Alpha-L-fucosidase 1; EC=3.2.1.51; AltName: Full=Alpha-1,3/4-fucosidase; Short=AtFUC1; AltName: Full=Alpha-L-fucoside fucohydrolase; Flags: Precursor;	SubName: Full=Uncharacterized protein {ECO:0000313|EMBL:KNA21973.1};	Alpha-L-fucosidase	GO:0048046,apoplast; GO:0005773,vacuole; GO:0004560,alpha-L-fucosidase activity; GO:0005975,carbohydrate metabolic process; GO:0006516,glycoprotein catabolic process	Alpha-L-fucosidase
gene-LOC110697161	0.7	1.26	1.53	0.2	0.43	0.56	39	69	75	11	23	30	3.107	1.636	0.00136297	0.0184744	up	NW_018744460.1	1544369	1547106	-	LOC110697161	--	K20888 xyloglucan galactosyltransferase MUR3 [EC:2.4.1.-] | (RefSeq) xyloglucan galactosyltransferase KATAMARI1 homolog (A)	xyloglucan galactosyltransferase XLT2-like [Chenopodium quinoa]	RecName: Full=Xyloglucan galactosyltransferase XLT2 {ECO:0000305}; EC=2.4.1.- {ECO:0000305}; AltName: Full=Glycosyltransferase 18 {ECO:0000303|PubMed:15020758}; Short=AtGT18 {ECO:0000303|PubMed:15020758}; AltName: Full=Protein XYLOGLUCAN L-SIDE CHAIN GALACTOSYLTRANSFERASE POSITION 2 {ECO:0000303|PubMed:22474179};	SubName: Full=Uncharacterized protein {ECO:0000313|EMBL:KNA21969.1};	Acetylglucosaminyltransferase EXT1/exostosin 1	GO:0005794,Golgi apparatus; GO:0000139,Golgi membrane; GO:0016021,integral component of membrane; GO:0008378,galactosyltransferase activity; GO:0006486,protein glycosylation; GO:0009969,xyloglucan biosynthetic process	Exostosin family
gene-LOC110697162	24.09	24.14	17.66	10.18	10.01	15.02	1132	1111	731	469	453	681	2.029	1.021	4.89225e-05	0.00112236	up	NW_018744460.1	1550669	1552974	-	LOC110697162	--	K20888 xyloglucan galactosyltransferase MUR3 [EC:2.4.1.-] | (RefSeq) xyloglucan galactosyltransferase KATAMARI1 homolog (A)	xyloglucan galactosyltransferase XLT2-like [Chenopodium quinoa]	RecName: Full=Xyloglucan galactosyltransferase XLT2 {ECO:0000305}; EC=2.4.1.- {ECO:0000305}; AltName: Full=Glycosyltransferase 18 {ECO:0000303|PubMed:15020758}; Short=AtGT18 {ECO:0000303|PubMed:15020758}; AltName: Full=Protein XYLOGLUCAN L-SIDE CHAIN GALACTOSYLTRANSFERASE POSITION 2 {ECO:0000303|PubMed:22474179};	SubName: Full=Uncharacterized protein {ECO:0000313|EMBL:KNA17738.1};	Acetylglucosaminyltransferase EXT1/exostosin 1	GO:0005794,Golgi apparatus; GO:0000139,Golgi membrane; GO:0016021,integral component of membrane; GO:0008378,galactosyltransferase activity; GO:0006486,protein glycosylation; GO:0009969,xyloglucan biosynthetic process	Exostosin family
gene-LOC110697197	1.72	1.53	1.78	0.55	0.7	0.63	54	47	49	17	21	19	2.83	1.501	0.000695215	0.0107083	up	NW_018744460.1	1915390	1917753	+	LOC110697197	--	K20896 formylaminopyrimidine deformylase / aminopyrimidine aminohydrolase [EC:3.5.1.- 3.5.99.-] | (RefSeq) probable bifunctional TENA-E protein (A)	probable bifunctional TENA-E protein [Chenopodium quinoa]	RecName: Full=Probable bifunctional TENA-E protein {ECO:0000250|UniProtKB:Q9ASY9}; EC=3.5.1.- {ECO:0000250|UniProtKB:Q9ASY9}; EC=3.5.99.2 {ECO:0000250|UniProtKB:Q9ASY9}; AltName: Full=Aminopyrimidine aminohydrolase {ECO:0000250|UniProtKB:Q9ASY9}; AltName: Full=Formylaminopyrimidine amidohydrolase {ECO:0000250|UniProtKB:Q9ASY9}; AltName: Full=Formylaminopyrimidine deformylase {ECO:0000250|UniProtK…	SubName: Full=Uncharacterized protein {ECO:0000313|EMBL:KNA23257.1};	--	GO:0005829,cytosol; GO:0050334,thiaminase activity; GO:0009228,thiamine biosynthetic process; GO:0009229,thiamine diphosphate biosynthetic process	TENA/THI-4/PQQC family
gene-LOC110697210	5.22	4.23	4.91	2.46	1.85	1.95	357	283	296	165	122	129	2.426	1.278	4.51737e-05	0.00104913	up	NW_018744460.1	2057413	2070436	-	LOC110697210	--	K21596 calmodulin-binding transcription activator | (RefSeq) calmodulin-binding transcription activator 5-like isoform X1 (A)	calmodulin-binding transcription activator 5-like isoform X1 [Chenopodium quinoa]	RecName: Full=Calmodulin-binding transcription activator 5 {ECO:0000303|PubMed:11925432}; Short=AtCAMTA5 {ECO:0000303|PubMed:11925432}; AltName: Full=Ethylene-induced calmodulin-binding protein f {ECO:0000303|PubMed:11782485}; Short=EICBP.f {ECO:0000303|PubMed:11782485}; AltName: Full=Signal-responsive protein 6 {ECO:0000303|PubMed:12218065}; Short=AtSR6 {ECO:0000303|PubMed:12218065};	SubName: Full=Uncharacterized protein {ECO:0000313|EMBL:KNA07165.1};	Uncharacterized conserved protein, contains IPT/TIG domain	GO:0005634,nucleus; GO:0005516,calmodulin binding; GO:0003700,DNA-binding transcription factor activity; GO:0043565,sequence-specific DNA binding; GO:0001077,proximal promoter DNA-binding transcription activator activity, RNA polymerase II-specific; GO:0070417,cellular response to cold; GO:0045944,positive regulation of transcription by RNA polymerase II; GO:0006355,regulation of transcription, D…	CG-1 domain
gene-LOC110697299	6.05	7.67	7.64	2.93	2.76	2.73	257	319	286	122	113	112	2.644	1.403	1.17229e-07	5.22314e-06	up	NW_018744460.1	3025141	3032960	-	LOC110697299	--	K10735 GINS complex subunit 4 | (RefSeq) DNA replication complex GINS protein SLD5-like isoform X1 (A)	DNA replication complex GINS protein SLD5-like isoform X2 [Chenopodium quinoa]	--	RecName: Full=DNA replication complex GINS protein SLD5 {ECO:0000256|PIRNR:PIRNR007764};	Predicted alpha-helical protein, potentially involved in replication/repair	GO:0005634,nucleus; GO:0006261,DNA-dependent DNA replication	DNA replication complex GINS protein SLD5 C-terminus
gene-LOC110697330	4.76	1.92	1.31	0	0	0	329	130	80	0	0	0	1078.21	10.074	9.61271e-14	1.16031e-11	up	NW_018744460.1	134407	146470	-	LOC110697330	--	K13466 EIX receptor 1/2 | (RefSeq) LRR receptor-like serine/threonine-protein kinase GSO2 (A)	receptor-like protein 12 [Chenopodium quinoa]	RecName: Full=Receptor-like protein EIX2 {ECO:0000305}; AltName: Full=EIX receptor 2 {ECO:0000312|EMBL:AAR28378.1}; Flags: Precursor;	SubName: Full=Uncharacterized protein {ECO:0000313|EMBL:KNA11576.1};	FOG: Leucine rich repeat	GO:0016021,integral component of membrane; GO:0005886,plasma membrane; GO:0050832,defense response to fungus	Leucine rich repeat
gene-LOC110697507	1.49	2.38	1.89	0	0	0	42	66	47	0	0	0	299.433	8.226	1.32144e-10	1.01685e-08	up	NW_018744466.1	1521447	1523464	-	LOC110697507	--	--	--	--	--	--	--	--
gene-LOC110697521	26.64	21.86	27.94	11.69	8.84	13.58	1023	822	945	440	327	503	2.427	1.279	1.3664e-07	6.02981e-06	up	NW_018744466.1	3078250	3080133	-	LOC110697521	--	K08238 xyloglucan 6-xylosyltransferase [EC:2.4.2.39] | (RefSeq) xyloglucan 6-xylosyltransferase 2-like (A)	xyloglucan 6-xylosyltransferase 2-like [Chenopodium quinoa]	RecName: Full=Xyloglucan 6-xylosyltransferase 1; Short=AtXT1; EC=2.4.2.39;	SubName: Full=Uncharacterized protein {ECO:0000313|EMBL:KNA10849.1};	Subunit of Golgi mannosyltransferase complex	GO:0005768,endosome; GO:0005794,Golgi apparatus; GO:0000139,Golgi membrane; GO:0016021,integral component of membrane; GO:0005802,trans-Golgi network; GO:0016758,transferase activity, transferring hexosyl groups; GO:0035252,UDP-xylosyltransferase activity; GO:0033843,xyloglucan 6-xylosyltransferase activity; GO:0000271,polysaccharide biosynthetic process; GO:0006486,protein glycosylation; GO:0010…	galactosyl transferase GMA12/MNN10 family
gene-LOC110697559	0.06	0.06	0.37	0	0	0	3	3	16	0	0	0	44.212	5.466	0.00451429	0.046278	up	NW_018744469.1	884503	888629	+	LOC110697559	--	K15201 general transcription factor 3C polypeptide 3 (transcription factor C subunit 4) | (RefSeq) general transcription factor 3C polypeptide 3 (A)	uncharacterized protein LOC110697559 isoform X1 [Chenopodium quinoa]	--	SubName: Full=Uncharacterized protein {ECO:0000313|EMBL:KNA25827.1};	--	--	--
gene-LOC110697569	2.15	1.86	1.84	0	0	0.08	86	73	65	0	0	3	84.105	6.394	3.13105e-11	2.61058e-09	up	NW_018744469.1	2544938	2548821	+	LOC110697569	--	--	--	--	--	--	--	--
gene-LOC110697587	3.96	4.99	5.55	1.53	1.26	3.49	140	173	173	53	43	119	2.57	1.362	0.00013024	0.0026316	up	NW_018744469.1	4937200	4939027	-	LOC110697587	--	K10878 meiotic recombination protein SPO11 | (RefSeq) DNA topoisomerase 6 subunit A-like (A)	DNA topoisomerase 6 subunit A-like [Chenopodium quinoa]	RecName: Full=DNA topoisomerase 6 subunit A {ECO:0000255|HAMAP-Rule:MF_03164}; Short=AtTOP6A; EC=5.99.1.3 {ECO:0000255|HAMAP-Rule:MF_03164}; AltName: Full=Meiotic recombination protein SPO11-3; Short=AtSPO11-3; AltName: Full=Protein BRASSINOSTEROID INSENSITIVE 5; AltName: Full=Protein ROOT HAIRLESS 2;	RecName: Full=DNA topoisomerase 6 subunit A {ECO:0000256|HAMAP-Rule:MF_03164}; EC=5.99.1.3 {ECO:0000256|HAMAP-Rule:MF_03164};	Catalytic subunit of the meiotic double strand break transesterase	GO:0000228,nuclear chromosome; GO:0005634,nucleus; GO:0005524,ATP binding; GO:0003677,DNA binding; GO:0003918,DNA topoisomerase type II (ATP-hydrolyzing) activity; GO:0016889,endodeoxyribonuclease activity, producing 3'-phosphomonoesters; GO:0042802,identical protein binding; GO:0046872,metal ion binding; GO:0000737,DNA catabolic process, endonucleolytic; GO:0006265,DNA topological change; GO:000…	Type IIB DNA topoisomerase
gene-LOC110697699	1.03	1.18	1.16	0.23	0.23	0.42	23	26	23	5	5	9	4.175	2.062	0.000714684	0.0109397	up	NW_018744497.1	1349575	1354709	+	LOC110697699	--	--	--	--	--	--	--	--
gene-LOC110697709	0.59	0.46	0.74	0	0	0	17	13	19	0	0	0	96.989	6.6	5.65515e-06	0.000168451	up	NW_018744497.1	2534431	2537519	+	LOC110697709	--	--	--	--	--	--	--	--
gene-LOC110697792	4.67	3.05	4.53	2.03	1.39	2.48	220	141	188	94	63	113	2.277	1.187	0.000527674	0.00854832	up	NW_018744501.1	366305	381715	-	LOC110697792	--	K11801 WD repeat-containing protein 23 | (RefSeq) LEC14B protein-like (A)	LEC14B protein-like [Chenopodium quinoa]	RecName: Full=LEC14B protein;	SubName: Full=Uncharacterized protein {ECO:0000313|EMBL:KNA08093.1};	WD40 repeat-containing protein	--	WD domain, G-beta repeat
gene-LOC110697838	3.8	1.46	4.23	1.08	1.02	1.33	104	39	102	29	27	35	3.011	1.59	0.00261811	0.0307578	up	NW_018744501.1	1680112	1689688	+	LOC110697838	--	K10144 RING finger and CHY zinc finger domain-containing protein 1 [EC:2.3.2.27] | (RefSeq) E3 ubiquitin-protein ligase MIEL1-like isoform X1 (A)	E3 ubiquitin-protein ligase MIEL1-like isoform X1 [Chenopodium quinoa]	RecName: Full=E3 ubiquitin-protein ligase MIEL1 {ECO:0000303|PubMed:23403577}; EC=2.3.2.27 {ECO:0000305}; AltName: Full=MYB30-interacting E3 ligase 1 {ECO:0000303|PubMed:23403577}; AltName: Full=Pirh2-like protein 1 {ECO:0000303|PubMed:21526181}; Short=AtPILP1 {ECO:0000303|PubMed:21526181}; AltName: Full=RING-type E3 ubiquitin transferase MIEL1 {ECO:0000305};	SubName: Full=Uncharacterized protein {ECO:0000313|EMBL:KNA24018.1};	Zn-finger protein	GO:0005737,cytoplasm; GO:0005634,nucleus; GO:0008134,transcription factor binding; GO:0004842,ubiquitin-protein transferase activity; GO:0008270,zinc ion binding; GO:0006952,defense response; GO:1900425,negative regulation of defense response to bacterium; GO:1901485,positive regulation of transcription factor catabolic process; GO:0016567,protein ubiquitination	Zinc-ribbon
gene-LOC110697849	0.82	0.98	0.68	0	0	0	34	40	25	0	0	0	192.12	7.586	1.08793e-08	5.88344e-07	up	NW_018744501.1	1946822	1950765	-	LOC110697849	--	K05016 chloride channel 7 | (RefSeq) chloride channel protein CLC-d isoform X1 (A)	chloride channel protein CLC-d-like [Chenopodium quinoa]	RecName: Full=Chloride channel protein CLC-d; Short=AtCLC-d; AltName: Full=CBS domain-containing protein CBSCLC2;	RecName: Full=Chloride channel protein {ECO:0000256|RuleBase:RU361221};	Cl- channel CLC-7 and related proteins (CLC superfamily)	GO:0034707,chloride channel complex; GO:0005802,trans-Golgi network; GO:0005247,voltage-gated chloride channel activity; GO:0034765,regulation of ion transmembrane transport; GO:0009826,unidimensional cell growth	Voltage gated chloride channel
gene-LOC110697884	4.03	1.84	3.88	0.39	0.24	0.12	105	47	89	10	6	3	13.679	3.774	1.27987e-08	6.86115e-07	up	NW_018742381.1	643080	655976	+	LOC110697884	--	K09264 MADS-box transcription factor, plant | (RefSeq) truncated transcription factor CAULIFLOWER A-like (A)	truncated transcription factor CAULIFLOWER A-like [Chenopodium quinoa]	RecName: Full=Agamous-like MADS-box protein AGL8 homolog; AltName: Full=POTM1-1;	SubName: Full=Uncharacterized protein {ECO:0000313|EMBL:KMT10844.1};	MADS box transcription factor	GO:0005634,nucleus; GO:0003700,DNA-binding transcription factor activity; GO:0046983,protein dimerization activity; GO:0000977,RNA polymerase II regulatory region sequence-specific DNA binding; GO:0045944,positive regulation of transcription by RNA polymerase II; GO:0006351,transcription, DNA-templated	K-box region
gene-LOC110697960	3.3	5.32	2.91	0.94	0.99	1.89	107	169	83	30	31	59	3.269	1.709	7.96506e-06	0.000229864	up	NW_018742381.1	847520	849110	+	LOC110697960	--	K20043 clathrin coat assembly protein AP180 | (RefSeq) putative clathrin assembly protein At5g35200 (A)	dof zinc finger protein DOF5.4-like [Chenopodium quinoa]	RecName: Full=Dof zinc finger protein DOF5.4; Short=AtDOF5.4; AltName: Full=OBF-binding protein 4;	SubName: Full=Uncharacterized protein {ECO:0000313|EMBL:KNA07311.1};	--	GO:0005634,nucleus; GO:0003700,DNA-binding transcription factor activity; GO:0046872,metal ion binding; GO:0044212,transcription regulatory region DNA binding; GO:0006355,regulation of transcription, DNA-templated; GO:0006351,transcription, DNA-templated	Dof domain, zinc finger
gene-LOC110697965	0.18	2.45	0.28	0.06	0	0	3	39	4	1	0	0	42.49	5.409	0.00207048	0.0255684	up	NW_018744502.1	1333703	1334891	+	LOC110697965	--	--	--	--	--	--	--	Glycine rich protein family
gene-LOC110697991	3.13	3.86	2.55	1.43	1.67	1.5	78	94	56	35	40	36	2.17	1.118	0.00396722	0.0421922	up	NW_018744502.1	2719928	2722318	+	LOC110697991	--	K15014 solute carrier family 29 (equilibrative nucleoside transporter), member 1/2/3 | (RefSeq) equilibrative nucleotide transporter 3-like (A)	NEP1-interacting protein-like 1 [Chenopodium quinoa]	RecName: Full=NEP1-interacting protein 1; AltName: Full=RING-H2 finger protein ATL26;	SubName: Full=NEP1-interacting protein {ECO:0000313|EMBL:CAP03014.1};	FOG: Predicted E3 ubiquitin ligase	GO:0009535,chloroplast thylakoid membrane; GO:0016021,integral component of membrane; GO:0046872,metal ion binding; GO:0061630,ubiquitin protein ligase activity; GO:0043161,proteasome-mediated ubiquitin-dependent protein catabolic process	Ring finger domain
gene-LOC110698009	0.34	0.52	0.45	0.07	0.07	0.09	24	36	28	5	5	6	5.924	2.567	2.43311e-05	0.000613862	up	NW_018744502.1	4018292	4026876	+	LOC110698009	--	--	uncharacterized protein LOC110698009 [Chenopodium quinoa]	--	SubName: Full=Uncharacterized protein {ECO:0000313|EMBL:KNA05185.1}; Flags: Fragment;	--	--	--
gene-LOC110698060	0.22	1.78	0.27	0.05	0.04	0.06	23	185	25	5	4	6	15.746	3.977	6.61393e-06	0.000194037	up	NW_018744502.1	5980838	5993981	-	LOC110698060	--	K02320 DNA polymerase alpha subunit A [EC:2.7.7.7] | (RefSeq) DNA polymerase alpha catalytic subunit-like (A)	DNA polymerase alpha catalytic subunit-like [Chenopodium quinoa]	RecName: Full=DNA polymerase alpha catalytic subunit; EC=2.7.7.7;	RecName: Full=DNA polymerase {ECO:0000256|RuleBase:RU000442}; EC=2.7.7.7 {ECO:0000256|RuleBase:RU000442};	DNA polymerase alpha, catalytic subunit	GO:0005658,alpha DNA polymerase:primase complex; GO:0005634,nucleus; GO:0008408,3'-5' exonuclease activity; GO:0051539,4 iron, 4 sulfur cluster binding; GO:0003677,DNA binding; GO:0003896,DNA primase activity; GO:0003887,DNA-directed DNA polymerase activity; GO:0046872,metal ion binding; GO:0001882,nucleoside binding; GO:0000166,nucleotide binding; GO:0006270,DNA replication initiation; GO:000630…	DNA polymerase family B
gene-LOC110698070	9.2	8.63	8.57	4.54	2.54	6.12	184	169	151	89	49	118	2.209	1.144	0.000307204	0.00546048	up	NW_018744502.1	6168533	6169513	+	LOC110698070	--	K07517 Delta3-Delta2-enoyl-CoA isomerase [EC:5.3.3.8] | (RefSeq) enoyl-CoA delta isomerase 2, peroxisomal-like (A)	enoyl-CoA delta isomerase 2, peroxisomal-like [Chenopodium quinoa]	RecName: Full=Enoyl-CoA delta isomerase 2, peroxisomal {ECO:0000305}; EC=5.3.3.8 {ECO:0000269|PubMed:18657232}; AltName: Full=Delta(3),Delta(2)-enoyl CoA isomerase 2 {ECO:0000303|PubMed:18657232}; Short=AtECI2 {ECO:0000303|PubMed:18657232}; AltName: Full=Indole-3-butyric acid response 10 {ECO:0000303|PubMed:18725356};	SubName: Full=Uncharacterized protein {ECO:0000313|EMBL:KNA19298.1};	--	GO:0005777,peroxisome; GO:0004165,dodecenoyl-CoA delta-isomerase activity; GO:0006635,fatty acid beta-oxidation; GO:0009062,fatty acid catabolic process; GO:0080024,indolebutyric acid metabolic process; GO:0080026,response to indolebutyric acid; GO:0048767,root hair elongation	Enoyl-CoA hydratase/isomerase
gene-LOC110698071	0.8	0.89	0.41	0	0	0	11	12	5	0	0	0	54.195	5.76	0.000470879	0.00776059	up	NW_018744502.1	6173266	6175393	+	LOC110698071	--	--	--	--	--	--	--	--
gene-LOC110698208	18.98	21.32	10.54	5.53	5.91	3.72	280	308	137	80	84	53	3.437	1.781	7.26109e-05	0.00158999	up	NW_018744502.1	7284054	7284777	+	LOC110698208	--	--	senescence associated gene 20 [Chenopodium quinoa]	RecName: Full=Senescence associated gene 20 {ECO:0000303|PubMed:10444084}; AltName: Full=Protein WOUND-INDUCED 12 {ECO:0000303|PubMed:12857840}; Short=AtWI-12 {ECO:0000303|PubMed:12857840};	SubName: Full=Uncharacterized protein {ECO:0000313|EMBL:KNA08915.1};	--	GO:0007568,aging; GO:0010150,leaf senescence; GO:0009620,response to fungus; GO:0002238,response to molecule of fungal origin; GO:0009624,response to nematode; GO:0010193,response to ozone	Wound-induced protein WI12
gene-LOC110698278	1.29	1.61	0.96	0.37	0.21	0.75	64	78	42	18	10	36	3.248	1.7	0.000557861	0.00891611	up	NW_018744504.1	86833	91075	-	LOC110698278	--	K20723 reticulon-3 | (RefSeq) reticulon-like protein B21 (A)	reticulon-like protein B21 [Chenopodium quinoa]	RecName: Full=Reticulon-like protein B21; Short=AtRTNLB21;	RecName: Full=Reticulon-like protein {ECO:0000256|RuleBase:RU363132};	--	GO:0005789,endoplasmic reticulum membrane; GO:0016021,integral component of membrane	Reticulon
gene-LOC110698284	1.79	2.53	2.53	0.53	0.65	1.75	86	119	107	25	30	81	2.61	1.384	0.00144367	0.0193174	up	NW_018744504.1	135740	138098	-	LOC110698284	--	K19041 E3 ubiquitin-protein ligase RNF38/44 [EC:2.3.2.27] | (RefSeq) RING-H2 finger protein ATL43-like (A)	RING-H2 finger protein ATL13-like [Chenopodium quinoa]	RecName: Full=RING-H2 finger protein ATL13; EC=2.3.2.27 {ECO:0000305}; AltName: Full=RING-type E3 ubiquitin transferase ATL13 {ECO:0000305};	SubName: Full=Uncharacterized protein {ECO:0000313|EMBL:KNA18240.1};	FOG: Predicted E3 ubiquitin ligase	GO:0016021,integral component of membrane; GO:0046872,metal ion binding; GO:0061630,ubiquitin protein ligase activity; GO:0043161,proteasome-mediated ubiquitin-dependent protein catabolic process; GO:0080167,response to karrikin	Ring finger domain
gene-LOC110698296	0.17	2.11	1.17	0	0.06	0	3	36	18	0	1	0	54.512	5.769	0.000321585	0.00567513	up	NW_018744504.1	423543	424396	+	LOC110698296	--	--	glycine-rich cell wall structural protein 2-like [Chenopodium quinoa]	--	SubName: Full=Uncharacterized protein {ECO:0000313|EMBL:KNA12298.1};	--	--	--
gene-LOC110698310	0.32	2.89	1.8	0.23	0.05	0.02	14	125	70	10	2	1	16.157	4.014	3.85441e-05	0.000912606	up	NW_018744504.1	593780	597377	-	LOC110698310	--	K01637 isocitrate lyase [EC:4.1.3.1] | (RefSeq) isocitrate lyase-like (A)	isocitrate lyase-like [Chenopodium quinoa]	RecName: Full=Isocitrate lyase {ECO:0000250|UniProtKB:P28297}; Short=ICL {ECO:0000250|UniProtKB:P28297}; EC=4.1.3.1 {ECO:0000250|UniProtKB:P28297}; AltName: Full=Isocitrase {ECO:0000250|UniProtKB:P28297}; AltName: Full=Isocitratsysase {ECO:0000250|UniProtKB:P28297};	RecName: Full=Isocitrate lyase {ECO:0000256|PIRNR:PIRNR001362};	Isocitrate lyase	GO:0009514,glyoxysome; GO:0004451,isocitrate lyase activity; GO:0046872,metal ion binding; GO:0006097,glyoxylate cycle; GO:0006099,tricarboxylic acid cycle	Isocitrate lyase family
gene-LOC110698323	17.21	35.74	37.54	13.11	10.45	24.65	241	490	463	180	141	333	2.038	1.027	0.00344074	0.0381076	up	NW_018744504.1	271751	272649	-	LOC110698323	--	--	--	--	--	--	--	--
gene-LOC110698369	1.51	0.74	0.49	0	0	0	46	22	13	0	0	0	160.98	7.331	5.44866e-07	2.12515e-05	up	NW_018742381.1	1785794	1793942	+	LOC110698369	--	--	uncharacterized protein LOC110698369 [Chenopodium quinoa]	--	SubName: Full=Uncharacterized protein {ECO:0000313|EMBL:KMS97539.1};	--	GO:0006950,response to stress	Universal stress protein family
gene-LOC110698370	7.29	9.07	7.32	0	0	0	156	190	138	0	0	0	940.35	9.877	7.04597e-16	1.13646e-13	up	NW_018744517.1	1939883	1964331	-	LOC110698370	--	K08311 putative (di)nucleoside polyphosphate hydrolase [EC:3.6.1.-] | (RefSeq) predicted protein (A)	nudix hydrolase 26, chloroplastic-like [Chenopodium quinoa]	RecName: Full=Nudix hydrolase 26, chloroplastic; Short=AtNUDT26; EC=3.6.1.-; AltName: Full=Bis(5'-nucleosyl)-tetraphosphatase (asymmetrical); Flags: Precursor;	SubName: Full=Uncharacterized protein {ECO:0000313|EMBL:KMS97908.1};	--	GO:0009507,chloroplast; GO:0034432,bis(5'-adenosyl)-pentaphosphatase activity; GO:0008893,guanosine-3',5'-bis(diphosphate) 3'-diphosphatase activity; GO:0046872,metal ion binding; GO:0006753,nucleoside phosphate metabolic process	NUDIX domain
gene-LOC110698459	99.54	89.02	157.84	31.15	21.91	16.89	1698	1487	2372	521	360	278	5.09	2.348	4.32027e-09	2.5289e-07	up	NW_018744537.1	431172	432262	-	LOC110698459	--	K13195 cold-inducible RNA-binding protein | (RefSeq) glycine-rich RNA-binding, abscisic acid-inducible protein-like (A)	glycine-rich RNA-binding, abscisic acid-inducible protein-like [Chenopodium quinoa]	RecName: Full=Glycine-rich RNA-binding protein;	SubName: Full=Uncharacterized protein {ECO:0000313|EMBL:KZN11015.1};	FOG: RRM domain	GO:0003723,RNA binding	RNA recognition motif. (a.k.a. RRM, RBD, or RNP domain)
gene-LOC110698489	1	2.93	1.17	0	0	0	32	92	33	0	0	0	295.417	8.207	1.32974e-09	8.54178e-08	up	NW_018744537.1	750652	752412	+	LOC110698489	--	K12472 epidermal growth factor receptor substrate 15 | (RefSeq) filaggrin-like (A)	BURP domain-containing protein BNM2A-like isoform X1 [Chenopodium quinoa]	RecName: Full=BURP domain-containing protein BNM2C {ECO:0000303|PubMed:19714473}; Flags: Precursor;	SubName: Full=Uncharacterized protein {ECO:0000313|EMBL:KNA12070.1};	--	GO:0000326,protein storage vacuole	BURP domain
gene-LOC110698504	86.56	69.67	77.51	39.89	40.41	35.63	3140	2475	2477	1419	1412	1247	2.114	1.08	0.000291542	0.0052122	up	NW_018744537.1	986110	990197	-	LOC110698504	--	K03527 4-hydroxy-3-methylbut-2-en-1-yl diphosphate reductase [EC:1.17.7.4] | (RefSeq) 4-hydroxy-3-methylbut-2-enyl diphosphate reductase, chloroplastic-like (A)	4-hydroxy-3-methylbut-2-enyl diphosphate reductase, chloroplastic-like [Chenopodium quinoa]	RecName: Full=4-hydroxy-3-methylbut-2-enyl diphosphate reductase, chloroplastic; EC=1.17.7.4; AltName: Full=Protein CHLOROPLAST BIOGENESIS 6; Flags: Precursor;	SubName: Full=Uncharacterized protein {ECO:0000313|EMBL:KNA10609.1};	--	GO:0009507,chloroplast; GO:0009570,chloroplast stroma; GO:0051538,3 iron, 4 sulfur cluster binding; GO:0051745,4-hydroxy-3-methylbut-2-en-1-yl diphosphate reductase activity; GO:0046429,4-hydroxy-3-methylbut-2-en-1-yl diphosphate synthase activity; GO:0046872,metal ion binding; GO:0050992,dimethylallyl diphosphate biosynthetic process; GO:0019288,isopentenyl diphosphate biosynthetic process, meth…	LytB protein
gene-LOC110698506	156.67	119.14	101.69	34.19	39.84	28.78	7692	5728	4398	1646	1884	1363	3.824	1.935	1.38056e-07	6.08499e-06	up	NW_018744537.1	991494	999087	+	LOC110698506	--	K01256 aminopeptidase N [EC:3.4.11.2] | (RefSeq) hypothetical protein (A)	protein TIC 62, chloroplastic-like [Chenopodium quinoa]	RecName: Full=Protein TIC 62, chloroplastic {ECO:0000303|PubMed:12426385}; AltName: Full=Translocon at the inner envelope membrane of chloroplasts 62 {ECO:0000303|PubMed:12426385}; Short=AtTIC62 {ECO:0000303|PubMed:12426385}; Flags: Precursor;	SubName: Full=Uncharacterized protein {ECO:0000313|EMBL:KNA10610.1};	Predicted dehydrogenase	GO:0009507,chloroplast; GO:0009941,chloroplast envelope; GO:0009706,chloroplast inner membrane; GO:0009570,chloroplast stroma; GO:0009534,chloroplast thylakoid; GO:0009535,chloroplast thylakoid membrane; GO:0098807,chloroplast thylakoid membrane protein complex; GO:0015031,protein transport	NAD(P)H-binding
gene-LOC110698514	1.42	0.67	0.54	0.2	0.29	0.22	80	37	27	11	16	12	3.969	1.989	0.00198295	0.0247607	up	NW_018744537.1	1066633	1071501	+	LOC110698514	--	K11968 ariadne-1 [EC:2.3.2.31] | (RefSeq) probable E3 ubiquitin-protein ligase ARI1 isoform X1 (A)	probable E3 ubiquitin-protein ligase ARI1 isoform X1 [Chenopodium quinoa]	RecName: Full=Probable E3 ubiquitin-protein ligase ARI1; EC=2.3.2.27 {ECO:0000250|UniProtKB:Q9Y4X5}; AltName: Full=ARIADNE-like protein ARI1; AltName: Full=Protein ariadne homolog 1; AltName: Full=RING-type E3 ubiquitin transferase ARI1 {ECO:0000305};	RecName: Full=RING-type E3 ubiquitin transferase {ECO:0000256|SAAS:SAAS00970528}; EC=2.3.2.27 {ECO:0000256|SAAS:SAAS00970528};	Predicted E3 ubiquitin ligase	GO:0005737,cytoplasm; GO:0000151,ubiquitin ligase complex; GO:0046872,metal ion binding; GO:0031624,ubiquitin conjugating enzyme binding; GO:0061630,ubiquitin protein ligase activity; GO:0032436,positive regulation of proteasomal ubiquitin-dependent protein catabolic process; GO:0000209,protein polyubiquitination; GO:0042787,NA	IBR domain, a half RING-finger domain
gene-LOC110698543	2.65	2.76	2.4	0.45	0.49	0.88	113	115	90	19	20	36	4.686	2.228	5.57953e-10	3.83059e-08	up	NW_018744537.1	1315061	1319484	-	LOC110698543	--	--	uncharacterized membrane protein At3g27390-like [Chenopodium quinoa]	RecName: Full=Uncharacterized membrane protein At3g27390;	SubName: Full=Uncharacterized protein {ECO:0000313|EMBL:KNA11585.1};	--	GO:0016021,integral component of membrane; GO:0005886,plasma membrane	--
gene-LOC110698551	0.66	0.55	0.34	0	0	0	11	9	5	0	0	0	48.909	5.612	0.000838731	0.0124383	up	NW_018744537.1	1364156	1367088	-	LOC110698551	--	--	--	--	--	--	--	--
gene-LOC110698554	5.5	2.48	6.01	0.1	0.21	0.05	111	49	107	2	4	1	41.187	5.364	9.74497e-12	8.67326e-10	up	NW_018744537.1	1412213	1413592	+	LOC110698554	--	--	CCG-binding protein 1-like [Chenopodium quinoa]	RecName: Full=CCG-binding protein 1; Short=AtCBP1 {ECO:0000303|PubMed:26462908}; AltName: Full=Protein MATERNAL EFFECT EMBRYO ARREST 14 {ECO:0000305};	SubName: Full=Uncharacterized protein {ECO:0000313|EMBL:KNA18602.1};	--	GO:0009507,chloroplast; GO:0005829,cytosol; GO:0005634,nucleus; GO:0036033,mediator complex binding; GO:0050832,defense response to fungus; GO:0009793,embryo development ending in seed dormancy; GO:0010183,pollen tube guidance	--
gene-LOC110698568	16.56	12.99	12.84	6.68	5.86	7.19	678	521	463	268	231	284	2.309	1.207	1.40854e-05	0.00037892	up	NW_018744537.1	1512585	1516654	-	LOC110698568	--	K14498 serine/threonine-protein kinase SRK2 [EC:2.7.11.1] | (RefSeq) serine/threonine-protein kinase SRK2E (A)	serine/threonine-protein kinase SRK2E [Chenopodium quinoa]	RecName: Full=Serine/threonine-protein kinase SRK2E; EC=2.7.11.1; AltName: Full=Protein OPEN STOMATA 1; AltName: Full=SNF1-related kinase 2.6; Short=SnRK2.6; AltName: Full=Serine/threonine-protein kinase OST1;	SubName: Full=Uncharacterized protein {ECO:0000313|EMBL:KNA15059.1};	Serine/threonine protein kinase	GO:0005737,cytoplasm; GO:0005829,cytosol; GO:0005634,nucleus; GO:0005524,ATP binding; GO:0009931,calcium-dependent protein serine/threonine kinase activity; GO:0042802,identical protein binding; GO:0016301,kinase activity; GO:0004672,protein kinase activity; GO:0019903,protein phosphatase binding; GO:0004674,protein serine/threonine kinase activity; GO:0009738,abscisic acid-activated signaling pa…	Protein kinase domain
gene-LOC110698571	5.71	5.69	5.26	1.34	2.09	1.43	286	279	232	66	101	69	3.53	1.82	9.13975e-07	3.37249e-05	up	NW_018744537.1	1540539	1543886	+	LOC110698571	--	K14491 two-component response regulator ARR-B family | (RefSeq) two-component response regulator ORR24-like (A)	transcription factor HHO6-like [Chenopodium quinoa]	RecName: Full=Myb family transcription factor EFM {ECO:0000303|PubMed:25132385}; AltName: Full=MYB-domain transcription factor HHO4 {ECO:0000305}; AltName: Full=Protein EARLY FLOWERING MYB {ECO:0000303|PubMed:25132385}; AltName: Full=Protein HRS1 HOMOLOG 4 {ECO:0000305};	SubName: Full=Uncharacterized protein {ECO:0000313|EMBL:KNA22891.1};	--	GO:0005634,nucleus; GO:0003677,DNA binding; GO:0003700,DNA-binding transcription factor activity; GO:0009908,flower development; GO:0009740,gibberellic acid mediated signaling pathway; GO:0010452,histone H3-K36 methylation; GO:0048579,negative regulation of long-day photoperiodism, flowering; GO:1903507,negative regulation of nucleic acid-templated transcription; GO:0006355,regulation of transcri…	Myb-like DNA-binding domain
gene-LOC110698584	17.02	19	23.35	9.7	8.12	11.38	442	483	534	247	203	285	2.167	1.116	3.14341e-07	1.28532e-05	up	NW_018744537.1	1658370	1659643	+	LOC110698584	--	K13258 2-hydroxyisoflavanone dehydratase [EC:4.2.1.105] | (RefSeq) 2-hydroxyisoflavanone dehydratase-like (A)	probable carboxylesterase 2 [Chenopodium quinoa]	RecName: Full=Probable carboxylesterase 2; AltName: Full=AtCXE2; EC=3.1.1.1;	SubName: Full=Uncharacterized protein {ECO:0000313|EMBL:KNA11776.1};	Arylacetamide deacetylase	GO:0052689,carboxylic ester hydrolase activity; GO:0016787,hydrolase activity; GO:0009056,catabolic process	alpha/beta hydrolase fold
gene-LOC110698591	8.75	4.82	6.4	0.51	0	0.04	228	123	147	13	0	1	38.768	5.277	5.27386e-09	3.04368e-07	up	NW_018744537.1	1745747	1753543	+	LOC110698591	--	--	uncharacterized protein LOC110698591 [Chenopodium quinoa]	--	SubName: Full=Agglutinin {ECO:0000313|EMBL:AAQ03084.1};	--	--	Agglutinin domain
gene-LOC110698602	35.72	49.78	12.49	9.74	0.38	3.61	883	1205	272	236	9	86	7.697	2.944	0.000548569	0.00880189	up	NW_018744537.1	1866265	1867939	-	LOC110698602	--	--	uncharacterized protein LOC110698602 [Chenopodium quinoa]	--	SubName: Full=Agglutinin {ECO:0000313|EMBL:AAQ03084.1};	--	--	Agglutinin domain
gene-LOC110698624	0.76	1.08	0.61	0.02	0.05	0.02	51	71	36	1	3	1	33.264	5.056	7.58101e-10	5.08189e-08	up	NW_018744537.1	2310445	2315052	-	LOC110698624	--	K13466 EIX receptor 1/2 | (RefSeq) LRR receptor-like serine/threonine-protein kinase GSO2 (A)	LRR receptor-like serine/threonine-protein kinase FLS2 [Chenopodium quinoa]	RecName: Full=Receptor-like protein 14 {ECO:0000303|PubMed:18434605}; Short=AtRLP14 {ECO:0000303|PubMed:18434605}; Flags: Precursor;	SubName: Full=LRR receptor-like serine/threonine-protein kinase FLS2 {ECO:0000313|EMBL:KHN19483.1}; EC=2.7.11.1 {ECO:0000313|EMBL:KHN19483.1};	FOG: Leucine rich repeat	GO:0009507,chloroplast; GO:0016021,integral component of membrane	Leucine rich repeat
gene-LOC110698649	61.8	36.09	45.29	15.52	8.83	13.07	1490	852	962	367	205	304	4.171	2.06	1.37632e-08	7.35684e-07	up	NW_018744537.1	2641302	2644140	-	LOC110698649	--	--	uncharacterized protein LOC110698649 [Chenopodium quinoa]	--	SubName: Full=Uncharacterized protein {ECO:0000313|EMBL:KNA20899.1};	--	--	--
gene-LOC110698651	0.31	0.19	0.23	0	0	0	17	10	11	0	0	0	75.38	6.236	4.67884e-05	0.00107944	up	NW_018744537.1	2646000	2650020	+	LOC110698651	--	K20416 palmitoyl-[glycerolipid] 7-desaturase [EC:1.14.19.42] | (RefSeq) palmitoyl-monogalactosyldiacylglycerol delta-7 desaturase, chloroplastic-like (A)	palmitoyl-monogalactosyldiacylglycerol delta-7 desaturase, chloroplastic-like [Chenopodium quinoa]	RecName: Full=Palmitoyl-monogalactosyldiacylglycerol delta-7 desaturase, chloroplastic {ECO:0000303|PubMed:15579662}; EC=1.14.19.42 {ECO:0000269|PubMed:15579662}; AltName: Full=Acyl-lipid desaturase 3 {ECO:0000303|PubMed:15240892}; AltName: Full=Fatty acid desaturase 5 {ECO:0000303|PubMed:15579662}; Short=FAD5 {ECO:0000303|PubMed:15579662}; AltName: Full=Fatty acid desaturase B {ECO:0000303|PubMe…	SubName: Full=Uncharacterized protein {ECO:0000313|EMBL:KNA20897.1};	Fatty acid desaturase	GO:0031969,chloroplast membrane; GO:0005789,endoplasmic reticulum membrane; GO:0016021,integral component of membrane; GO:0009579,thylakoid; GO:0016717,oxidoreductase activity, acting on paired donors, with oxidation of a pair of donors resulting in the reduction of molecular oxygen to two molecules of water; GO:0031408,oxylipin biosynthetic process; GO:0010205,photoinhibition; GO:0006636,unsatur…	Fatty acid desaturase
gene-LOC110698676	0.56	0.67	0.76	0.01	0	0.01	41	48	49	1	0	1	75.918	6.246	3.54648e-08	1.74193e-06	up	NW_018744537.1	3086704	3092990	-	LOC110698676	--	K01213 galacturan 1,4-alpha-galacturonidase [EC:3.2.1.67] | (RefSeq) probable polygalacturonase At1g80170 (A)	probable polygalacturonase At1g80170 [Chenopodium quinoa]	RecName: Full=Probable polygalacturonase At1g80170; Short=PG; EC=3.2.1.15; AltName: Full=Pectinase At1g80170; Flags: Precursor;	SubName: Full=Uncharacterized protein {ECO:0000313|EMBL:KNA10562.1};	--	GO:0005576,extracellular region; GO:0009505,plant-type cell wall; GO:0004650,polygalacturonase activity; GO:0005975,carbohydrate metabolic process; GO:0071555,cell wall organization	Glycosyl hydrolases family 28
gene-LOC110698691	0.96	0.39	0.18	0	0.03	0	30	12	5	0	1	0	48.125	5.589	0.000414053	0.00693902	up	NW_018744537.1	3278197	3281711	-	LOC110698691	--	K06130 lysophospholipase II [EC:3.1.1.5] | (RefSeq) acyl-protein thioesterase 2-like (A)	acyl-protein thioesterase 2-like [Chenopodium quinoa]	RecName: Full=Probable carboxylesterase Os04g0669500 {ECO:0000305}; EC=3.1.1.- {ECO:0000305};	SubName: Full=Uncharacterized protein {ECO:0000313|EMBL:KNA23291.1};	Lysophospholipase	GO:0005737,cytoplasm; GO:0052689,carboxylic ester hydrolase activity; GO:0008474,palmitoyl-(protein) hydrolase activity; GO:0006631,fatty acid metabolic process; GO:0002084,protein depalmitoylation	Phospholipase/Carboxylesterase
gene-LOC110698704	3.53	0.45	1.26	0.07	0.05	0.12	216	27	68	4	3	7	26.027	4.702	4.61265e-08	2.21551e-06	up	NW_018744537.1	3476203	3482446	-	LOC110698704	--	K06573 solute carrier family 4 (anion exchanger), member 1 | (RefSeq) AE family transporter: anion exchange (A)	boron transporter 4-like [Chenopodium quinoa]	RecName: Full=Boron transporter 4;	SubName: Full=Uncharacterized protein {ECO:0000313|EMBL:KNA11377.1};	Na+-independent Cl/HCO3 exchanger AE1 and related transporters (SLC4 family)	GO:0005887,integral component of plasma membrane; GO:0005886,plasma membrane; GO:0015301,anion:anion antiporter activity; GO:0080139,borate efflux transmembrane transporter activity; GO:0005452,inorganic anion exchanger activity; GO:0046713,borate transport; GO:0080029,cellular response to boron-containing substance levels; GO:0051453,regulation of intracellular pH	HCO3- transporter family
gene-LOC110698715	26.35	32.81	43.04	22.07	11.67	20.19	912	1112	1312	749	389	674	2.022	1.016	0.000531507	0.00859158	up	NW_018744537.1	3676912	3679244	+	LOC110698715	--	K03063 26S proteasome regulatory subunit T3 | (RefSeq) 26S protease regulatory subunit 6B homolog (A)	root phototropism protein 3-like [Chenopodium quinoa]	RecName: Full=Coleoptile phototropism protein 1; AltName: Full=BTB/POZ domain-containing protein CPT1; AltName: Full=Non-phototropic hypocotyl 3-like protein; Short=NPH3-like protein;	SubName: Full=Uncharacterized protein {ECO:0000313|EMBL:KNA11059.1};	--	GO:0005886,plasma membrane; GO:0009638,phototropism; GO:0016567,protein ubiquitination	NPH3 family
gene-LOC110698718	8.49	7.18	6.89	2.9	2.52	3.64	203	168	145	68	58	84	2.696	1.431	1.58151e-06	5.45422e-05	up	NW_018744537.1	3703465	3704637	-	LOC110698718	--	K13346 peroxin-10 | (RefSeq) stress-response A/B barrel domain-containing protein UP3 (A)	stress-response A/B barrel domain-containing protein UP3-like [Chenopodium quinoa]	RecName: Full=Stress-response A/B barrel domain-containing protein UP3 {ECO:0000305}; AltName: Full=Unknown protein 3 {ECO:0000303|PubMed:17951448};	SubName: Full=Uncharacterized protein {ECO:0000313|EMBL:KNA16585.1};	--	GO:0009507,chloroplast; GO:0009570,chloroplast stroma; GO:0005777,peroxisome	Stress responsive A/B Barrel Domain
gene-LOC110698724	7.24	8.51	9.46	3.16	4.03	3.93	252	290	290	108	135	132	2.369	1.244	8.99588e-06	0.00025442	up	NW_018744537.1	3819363	3827001	-	LOC110698724	--	K00837 aromatic aminotransferase [EC:2.6.1.-] | (RefSeq) aromatic aminotransferase ISS1-like (A)	aromatic aminotransferase ISS1-like [Chenopodium quinoa]	RecName: Full=Aromatic aminotransferase ISS1 {ECO:0000303|PubMed:26163189}; EC=2.6.1.27 {ECO:0000269|PubMed:26163189}; EC=2.6.1.5 {ECO:0000269|PubMed:26163189}; EC=2.6.1.88 {ECO:0000269|PubMed:23377040, ECO:0000269|PubMed:26163189}; AltName: Full=Methionine aminotransferase ISS1 {ECO:0000305}; AltName: Full=Phenylalanine aminotransferase ISS1 {ECO:0000305}; AltName: Full=Protein INDOLE SEVERE SEN…	SubName: Full=Uncharacterized protein {ECO:0000313|EMBL:KNA12068.1};	Kynurenine aminotransferase, glutamine transaminase K	GO:0005737,cytoplasm; GO:0005829,cytosol; GO:0080130,L-phenylalanine:2-oxoglutarate aminotransferase activity; GO:0050362,L-tryptophan:2-oxoglutarate aminotransferase activity; GO:0004838,L-tyrosine:2-oxoglutarate aminotransferase activity; GO:0010326,methionine-oxo-acid transaminase activity; GO:0030170,pyridoxal phosphate binding; GO:0008483,transaminase activity; GO:0009072,aromatic amino acid…	Aminotransferase class I and II
gene-LOC110698742	113.71	96.36	77.46	10.85	11.43	11.09	3708	3077	2225	347	359	349	9.116	3.188	1.41652e-25	7.58267e-23	up	NW_018744537.1	4107086	4108685	+	LOC110698742	--	--	F-box/kelch-repeat protein At1g80440-like [Chenopodium quinoa]	RecName: Full=F-box/kelch-repeat protein At1g80440;	SubName: Full=Uncharacterized protein {ECO:0000313|EMBL:KNA14194.1};	FOG: Kelch repeat	GO:0005829,cytosol; GO:0019005,SCF ubiquitin ligase complex; GO:0031625,ubiquitin protein ligase binding; GO:0080037,negative regulation of cytokinin-activated signaling pathway; GO:0043161,proteasome-mediated ubiquitin-dependent protein catabolic process; GO:0042787,NA; GO:2000762,regulation of phenylpropanoid metabolic process; GO:0030162,regulation of proteolysis	Kelch motif
gene-LOC110698749	11.8	27.62	9	0.7	0.61	1.03	500	1146	336	29	25	42	21.908	4.453	3.35137e-23	1.34556e-20	up	NW_018744537.1	4193493	4197440	+	LOC110698749	--	--	--	--	--	--	--	--
gene-LOC110698774	16.11	18.78	17.59	5.3	6.65	8.47	558	637	537	180	222	283	2.74	1.454	3.17432e-10	2.26783e-08	up	NW_018744537.1	4681234	4684204	-	LOC110698774	--	--	uncharacterized protein LOC110698774 [Chenopodium quinoa]	RecName: Full=NDR1/HIN1-like protein 1 {ECO:0000303|Ref.1};	SubName: Full=Uncharacterized protein {ECO:0000313|EMBL:KNA07856.1};	--	GO:0046658,anchored component of plasma membrane; GO:0016021,integral component of membrane; GO:0009506,plasmodesma; GO:0004871,NA; GO:0051607,defense response to virus	Late embryogenesis abundant protein
gene-LOC110698786	1.97	1.48	1	0.55	0.41	0.47	65	48	29	18	13	15	3.341	1.74	0.00104666	0.0149034	up	NW_018742385.1	113600	115222	+	LOC110698786	--	K14841 ribosome biogenesis protein NSA1 | (RefSeq) WD repeat-containing protein DDB_G0290555 (A)	zinc finger protein ZAT12-like [Chenopodium quinoa]	RecName: Full=Zinc finger protein ZAT11;	SubName: Full=Uncharacterized protein {ECO:0000313|EMBL:KNA25614.1};	FOG: Zn-finger	GO:0005634,nucleus; GO:0003700,DNA-binding transcription factor activity; GO:0046872,metal ion binding; GO:0003676,nucleic acid binding; GO:0071289,cellular response to nickel ion; GO:2000280,regulation of root development; GO:0006355,regulation of transcription, DNA-templated; GO:0010200,response to chitin; GO:0006351,transcription, DNA-templated	C2H2-type zinc finger
gene-LOC110698810	14.4	9.69	12.4	7.14	5.93	5.66	290	191	220	141	115	110	2.064	1.045	0.00353617	0.0388726	up	NW_018744537.1	5163040	5167365	-	LOC110698810	--	K17604 zinc finger SWIM domain-containing protein 3 | (RefSeq) protein FAR1-RELATED SEQUENCE 5-like (A)	probable inactive nicotinamidase At3g16190 [Chenopodium quinoa]	RecName: Full=Probable inactive nicotinamidase At3g16190 {ECO:0000305};	SubName: Full=Uncharacterized protein {ECO:0000313|EMBL:KNA22449.1};	--	GO:0005737,cytoplasm; GO:0003824,catalytic activity; GO:0006212,uracil catabolic process	Isochorismatase family
gene-LOC110698817	12.09	19.77	26.68	0	0	0	417	668	811	0	0	0	3698.59	11.853	8.48512e-22	2.98482e-19	up	NW_018744537.1	5235241	5238711	-	LOC110698817	--	K11090 lupus La protein | (RefSeq) la protein 1-like isoform X1 (A)	uncharacterized protein LOC110698817 [Chenopodium quinoa]	--	SubName: Full=Uncharacterized protein {ECO:0000313|EMBL:KNA05774.1}; Flags: Fragment;	--	--	Myb/SANT-like DNA-binding domain
gene-LOC110698863	0.52	0.61	0.7	0.17	0.14	0.44	38	44	45	12	10	31	2.729	1.448	0.00408468	0.0430324	up	NW_018742385.1	331493	339149	+	LOC110698863	--	K15078 structure-specific endonuclease subunit SLX1 [EC:3.6.1.-] | (RefSeq) putative disease resistance protein RGA1 (A)	putative disease resistance protein RGA1 [Chenopodium quinoa]	RecName: Full=Disease resistance protein RGA2; AltName: Full=Blight resistance protein RPI; AltName: Full=RGA2-blb;	SubName: Full=NBS-LRR type resistance protein {ECO:0000313|EMBL:ABJ99600.1};	Apoptotic ATPase	GO:0043531,ADP binding; GO:0005524,ATP binding; GO:0006952,defense response	NB-ARC domain
gene-LOC110699048	28.06	43.5	41.04	4.68	4.73	13.11	967	1468	1246	158	157	436	5.584	2.481	1.88383e-12	1.90113e-10	up	NW_018744560.1	945447	947137	+	LOC110699048	--	--	uncharacterized protein LOC110699048 [Chenopodium quinoa]	--	SubName: Full=Uncharacterized protein {ECO:0000313|EMBL:KNA17610.1};	--	--	Arabidopsis protein of unknown function
gene-LOC110699103	10.41	0.31	0.95	0.44	0.24	0.42	311	9	25	13	7	12	12.563	3.651	0.00074396	0.0113129	up	NW_018744570.1	121124	122709	+	LOC110699103	--	--	--	--	--	--	--	--
gene-LOC110699198	2.84	0.99	0.89	0.28	0.28	0.14	105	36	29	10	10	5	7.257	2.859	0.00013357	0.00269152	up	NW_018744582.1	909080	911756	+	LOC110699198	--	K13493 cytokinin-N-glucosyltransferase [EC:2.4.1.-] | (RefSeq) UDP-glycosyltransferase 76C2 (A)	UDP-glycosyltransferase 76B1-like [Chenopodium quinoa]	RecName: Full=UDP-glycosyltransferase 76B1 {ECO:0000305}; EC=2.4.1.- {ECO:0000305};	SubName: Full=Uncharacterized protein {ECO:0000313|EMBL:KNA24609.1};	UDP-glucuronosyl and UDP-glucosyl transferase	GO:0043231,intracellular membrane-bounded organelle; GO:0046527,glucosyltransferase activity; GO:0080043,quercetin 3-O-glucosyltransferase activity; GO:0080044,quercetin 7-O-glucosyltransferase activity; GO:0052640,salicylic acid glucosyltransferase (glucoside-forming) activity; GO:0006952,defense response; GO:0010150,leaf senescence; GO:0008152,metabolic process; GO:0002239,response to oomycetes	UDP-glucoronosyl and UDP-glucosyl transferase
gene-LOC110699237	5.44	12.51	6.28	3.65	4	4.45	237	534	241	156	168	187	2.066	1.047	0.00317253	0.0356389	up	NW_018744582.1	1313596	1315734	-	LOC110699237	--	K19747 BAHD acyltransferase [EC:2.3.1.-] | (RefSeq) BAHD acyltransferase DCR (A)	uncharacterized acetyltransferase At3g50280-like [Chenopodium quinoa]	RecName: Full=Uncharacterized acetyltransferase At3g50280; EC=2.3.1.-;	SubName: Full=Uncharacterized protein {ECO:0000313|EMBL:KNA16130.1};	--	GO:0016747,transferase activity, transferring acyl groups other than amino-acyl groups	Transferase family
gene-LOC110699238	3.57	4.04	4.23	1.26	1.95	2.95	323	358	337	112	170	258	2.078	1.055	0.000643428	0.0100362	up	NW_018744582.1	1335407	1339848	-	LOC110699238	--	K13415 protein brassinosteroid insensitive 1 [EC:2.7.10.1 2.7.11.1] | (RefSeq) systemin receptor SR160-like (A)	systemin receptor SR160-like [Chenopodium quinoa]	RecName: Full=Systemin receptor SR160; EC=2.7.11.1; AltName: Full=Brassinosteroid LRR receptor kinase; Flags: Precursor;	SubName: Full=Uncharacterized protein {ECO:0000313|EMBL:KNA23893.1};	--	GO:0016021,integral component of membrane; GO:0005886,plasma membrane; GO:0005524,ATP binding; GO:0004674,protein serine/threonine kinase activity; GO:0005496,steroid binding; GO:0006952,defense response	Protein kinase domain
gene-LOC110699306	2.24	2.01	2.74	0.66	0.59	1.03	90	79	97	26	23	40	3.321	1.732	1.83745e-06	6.20934e-05	up	NW_018744582.1	2192590	2194558	-	LOC110699306	--	K15400 omega-hydroxypalmitate O-feruloyl transferase [EC:2.3.1.188] | (RefSeq) omega-hydroxypalmitate O-feruloyl transferase-like (A)	omega-hydroxypalmitate O-feruloyl transferase-like [Chenopodium quinoa]	RecName: Full=Omega-hydroxypalmitate O-feruloyl transferase; EC=2.3.1.188; AltName: Full=Omega-hydroxyacid hydroxycinnamoyltransferase; AltName: Full=Protein ALIPHATIC SUBERIN FERULOYL TRANSFERASE;	SubName: Full=Uncharacterized protein {ECO:0000313|EMBL:KNA13859.1}; Flags: Fragment;	--	GO:0050734,hydroxycinnamoyltransferase activity; GO:0102406,omega-hydroxypalmitate O-sinapoyl transferase activity; GO:0052325,cell wall pectin biosynthetic process; GO:0010345,suberin biosynthetic process	Transferase family
gene-LOC110699331	12.92	26.38	43.14	5.97	3.91	7.57	223	446	656	101	65	126	5.026	2.329	5.41199e-08	2.576e-06	up	NW_018744582.1	2447132	2447978	-	LOC110699331	--	K02898 large subunit ribosomal protein L26e | (RefSeq) 60S ribosomal protein L26-2-like (A)	60S ribosomal protein L26-2-like [Chenopodium quinoa]	RecName: Full=60S ribosomal protein L26-2;	SubName: Full=Putative ribosomal protein L26/L24P, eukaryotic/archaeal {ECO:0000313|EMBL:OTG15646.1};	60S ribosomal protein L26	GO:0022625,cytosolic large ribosomal subunit; GO:0022626,cytosolic ribosome; GO:0042788,polysomal ribosome; GO:0003723,RNA binding; GO:0003735,structural constituent of ribosome; GO:0002181,cytoplasmic translation; GO:0042273,ribosomal large subunit biogenesis	Ribosomal proteins L26 eukaryotic, L24P archaeal
gene-LOC110699353	22.26	14.36	18.95	7.89	10.42	7.28	1151	727	863	400	519	363	2.26	1.177	0.00216216	0.0263744	up	NW_018744582.1	2655929	2664520	+	LOC110699353	--	--	protein RETICULATA-RELATED 6, chloroplastic-like [Chenopodium quinoa]	RecName: Full=Protein RETICULATA-RELATED 5, chloroplastic {ECO:0000303|PubMed:23596191}; Flags: Precursor;	SubName: Full=Uncharacterized protein {ECO:0000313|EMBL:KNA05610.1};	--	GO:0009507,chloroplast; GO:0031969,chloroplast membrane; GO:0016021,integral component of membrane; GO:0015995,chlorophyll biosynthetic process; GO:0007275,multicellular organism development; GO:0009741,response to brassinosteroid	Protein RETICULATA-related
gene-LOC110699356	9.32	4.77	4.77	2.08	1.44	1.43	357	179	161	78	53	53	4.109	2.039	1.2105e-05	0.000331931	up	NW_018744582.1	2698702	2701929	+	LOC110699356	--	--	staphylococcal-like nuclease CAN1 isoform X1 [Chenopodium quinoa]	RecName: Full=Staphylococcal-like nuclease CAN2; EC=3.1.31.-; AltName: Full=Calcium-dependent nuclease 2; Short=AtCAN2; Short=Ca(2+)-dependent nuclease 2;	SubName: Full=Uncharacterized protein {ECO:0000313|EMBL:KNA18940.1};	--	GO:0005737,cytoplasm; GO:0005634,nucleus; GO:0005886,plasma membrane; GO:0004520,endodeoxyribonuclease activity; GO:0004521,endoribonuclease activity; GO:0046872,metal ion binding; GO:0006308,DNA catabolic process; GO:0006401,RNA catabolic process	Staphylococcal nuclease homologue
gene-LOC110699357	8.81	1.74	6.92	1.62	0.93	2.01	227	44	157	41	23	50	4.361	2.125	0.00075518	0.0114693	up	NW_018744582.1	2701937	2705340	-	LOC110699357	--	K17292 tubulin-specific chaperone A | (RefSeq) tubulin-folding cofactor A-like (A)	uncharacterized protein LOC110699357 [Chenopodium quinoa]	--	SubName: Full=Uncharacterized protein {ECO:0000313|EMBL:KNA18941.1};	--	--	--
gene-LOC110699358	7.89	3.92	8.31	1.77	2.75	2.55	360	175	334	79	121	112	3.034	1.601	0.000273005	0.00493816	up	NW_018744582.1	2736818	2739312	-	LOC110699358	--	--	uncharacterized protein LOC110699358 [Chenopodium quinoa]	--	SubName: Full=Uncharacterized protein {ECO:0000313|EMBL:KNA11328.1};	--	GO:0016021,integral component of membrane	Protein of unknown function (DUF2985)
gene-LOC110699376	18.5	10.23	15.45	4.65	5.28	2.13	458	248	337	113	126	51	3.725	1.897	0.00026777	0.00486012	up	NW_018744582.1	2875224	2877281	-	LOC110699376	--	K00430 peroxidase [EC:1.11.1.7] | (RefSeq) peroxidase P7-like (A)	peroxidase P7-like [Chenopodium quinoa]	RecName: Full=Cationic peroxidase 1; EC=1.11.1.7; AltName: Full=PNPC1; Flags: Precursor;	RecName: Full=Peroxidase {ECO:0000256|RuleBase:RU362060, ECO:0000256|SAAS:SAAS00709852}; EC=1.11.1.7 {ECO:0000256|RuleBase:RU362060, ECO:0000256|SAAS:SAAS00709852};	--	GO:0005576,extracellular region; GO:0020037,heme binding; GO:0046872,metal ion binding; GO:0004601,peroxidase activity; GO:0042744,hydrogen peroxide catabolic process; GO:0006979,response to oxidative stress	Peroxidase
gene-LOC110699385	11.89	6.75	4.32	0.22	0.1	2.74	378	210	121	7	3	84	9.764	3.288	0.000300663	0.00536229	up	NW_018744582.1	2994831	2997373	+	LOC110699385	--	K23810 (E)-8-carboxylinalool synthase [EC:1.14.14.-] | (RefSeq) geraniol 8-hydroxylase (A)	cytochrome P450 76AD1-like [Chenopodium quinoa]	RecName: Full=Cytochrome P450 76AD1 {ECO:0000303|PubMed:22660548}; EC=1.14.-.- {ECO:0000305};	SubName: Full=CYP76AD1 {ECO:0000313|EMBL:AQS22859.1};	Cytochrome P450 CYP2 subfamily	GO:0016021,integral component of membrane; GO:0020037,heme binding; GO:0005506,iron ion binding; GO:0004497,monooxygenase activity; GO:0016705,oxidoreductase activity, acting on paired donors, with incorporation or reduction of molecular oxygen	Cytochrome P450
gene-LOC110699387	0.75	0.49	0.64	0	0	0.17	28	18	21	0	0	6	13.735	3.78	0.000771979	0.0116669	up	NW_018744582.1	2956853	2960047	+	LOC110699387	--	--	--	--	--	--	--	--
gene-LOC110699505	3.15	5.44	4.74	0	0	0	55	93	73	0	0	0	427.016	8.738	4.32258e-12	4.08827e-10	up	NW_018744583.1	222413	223565	+	LOC110699505	--	--	--	--	--	--	--	--
gene-LOC110699568	6.93	16.43	17.92	0	0	0	323	750	736	0	0	0	3491.33	11.77	4.9778e-21	1.67146e-18	up	NW_018744593.1	260132	262531	-	LOC110699568	--	--	--	--	--	--	--	--
gene-LOC110699613	20.54	9.78	9.49	5.13	6.45	5.85	506	236	206	124	153	139	2.464	1.301	0.00474829	0.0481322	up	NW_018744593.1	1695315	1696882	+	LOC110699613	--	K01213 galacturan 1,4-alpha-galacturonidase [EC:3.2.1.67] | (RefSeq) exopolygalacturonase-like (A)	uncharacterized protein At4g22758-like [Chenopodium quinoa]	RecName: Full=Uncharacterized protein At4g22758;	SubName: Full=Uncharacterized protein {ECO:0000313|EMBL:KNA24095.1};	FOG: PPR repeat	--	SAPK-interacting protein 1 (Sin1), middle CRIM domain
gene-LOC110699650	0.22	0.15	0.17	0.02	0	0.02	12	8	8	1	0	1	15.746	3.977	0.0040769	0.0429825	up	NW_018744593.1	2518111	2520731	+	LOC110699650	--	K12761 carbon catabolite-derepressing protein kinase [EC:2.7.11.1] | (RefSeq) CIPK07; CBL-interacting serine/threonine-protein kinase 11-like (A)	CBL-interacting serine/threonine-protein kinase 11-like [Chenopodium quinoa]	RecName: Full=CBL-interacting serine/threonine-protein kinase 11; EC=2.7.11.1; AltName: Full=SNF1-related kinase 3.22; AltName: Full=SOS2-like protein kinase PKS5; AltName: Full=SOS3-interacting protein 4;	RecName: Full=Non-specific serine/threonine protein kinase {ECO:0000256|SAAS:SAAS00351747}; EC=2.7.11.1 {ECO:0000256|SAAS:SAAS00351747};	Serine/threonine protein kinase	GO:0005622,intracellular; GO:0005524,ATP binding; GO:0004672,protein kinase activity; GO:0004674,protein serine/threonine kinase activity; GO:0035556,intracellular signal transduction; GO:0018105,peptidyl-serine phosphorylation; GO:0018107,peptidyl-threonine phosphorylation; GO:0006468,protein phosphorylation; GO:0009268,response to pH	Protein kinase domain
gene-LOC110699652	1.65	1.49	1.83	0.34	0.12	0.29	88	78	86	18	6	15	7.172	2.842	8.89564e-10	5.89891e-08	up	NW_018744593.1	2624078	2637836	-	LOC110699652	--	--	--	--	--	--	--	--
gene-LOC110699711	20.15	16.46	18.01	4.03	3	4.42	780	624	614	153	112	165	5.159	2.367	1.17341e-19	3.23442e-17	up	NW_018744593.1	4793018	4806498	+	LOC110699711	--	K14455 aspartate aminotransferase, mitochondrial [EC:2.6.1.1] | (RefSeq) aspartate aminotransferase, mitochondrial-like (A)	aspartate aminotransferase, mitochondrial-like [Chenopodium quinoa]	RecName: Full=Aspartate aminotransferase, mitochondrial; EC=2.6.1.1; AltName: Full=Transaminase A; Flags: Precursor;	RecName: Full=Aspartate aminotransferase {ECO:0000256|RuleBase:RU000480}; EC=2.6.1.1 {ECO:0000256|RuleBase:RU000480}; Flags: Fragment;	Aspartate aminotransferase/Glutamic oxaloacetic transaminase AAT1/GOT2	GO:0005759,mitochondrial matrix; GO:0005739,mitochondrion; GO:0005507,copper ion binding; GO:0004069,L-aspartate:2-oxoglutarate aminotransferase activity; GO:0080130,L-phenylalanine:2-oxoglutarate aminotransferase activity; GO:0030170,pyridoxal phosphate binding; GO:0006103,2-oxoglutarate metabolic process; GO:0006531,aspartate metabolic process; GO:0009058,biosynthetic process; GO:0006536,glutam…	Aminotransferase class I and II
gene-LOC110699761	0.76	0.77	0.8	0.1	0	0.05	16	16	15	2	0	1	17.267	4.11	0.000245336	0.00452408	up	NW_018744593.1	333891	335305	+	LOC110699761	--	K03695 ATP-dependent Clp protease ATP-binding subunit ClpB | (RefSeq) LOW QUALITY PROTEIN: chaperone protein ClpB3, chloroplastic-like (A)	jacalin-related lectin 19-like [Chenopodium quinoa]	RecName: Full=Jacalin-related lectin 19;	SubName: Full=Uncharacterized protein {ECO:0000313|EMBL:EXB34860.1};	--	GO:0030246,carbohydrate binding	Jacalin-like lectin domain
gene-LOC110699924	12.31	2.08	9.27	0.09	0.28	0.14	549	91	364	4	12	6	49.394	5.626	1.08887e-13	1.3058e-11	up	NW_018744603.1	626230	631402	-	LOC110699924	--	K01840 phosphomannomutase [EC:5.4.2.8] | (RefSeq) uncharacterized protein LOC107434468 (A)	uncharacterized protein LOC110699924 [Chenopodium quinoa]	--	SubName: Full=Uncharacterized protein {ECO:0000313|EMBL:KNA03284.1};	Phosphoglucomutase/phosphomannomutase	GO:0016868,intramolecular transferase activity, phosphotransferases; GO:0005975,carbohydrate metabolic process	Phosphoglucomutase/phosphomannomutase, alpha/beta/alpha domain I
gene-LOC110699931	3.43	2.57	3.3	1.1	1.05	1.05	169	124	143	53	50	50	3.082	1.624	3.87827e-06	0.000121294	up	NW_018744603.1	1026508	1039654	-	LOC110699931	--	--	--	--	--	--	--	--
gene-LOC110700014	0.44	0.89	1.04	0	0	0	9	18	19	0	0	0	89.184	6.479	1.34906e-05	0.000364511	up	NW_018744616.1	484747	487468	+	LOC110700014	--	--	--	--	--	--	--	--
gene-LOC110700031	1.25	1.6	3.08	0.11	0.22	0.43	12	15	26	1	2	4	8.488	3.085	0.000737862	0.0112386	up	NW_018744616.1	1404214	1404995	+	LOC110700031	--	--	--	--	--	--	--	--
gene-LOC110700077	1.81	2.95	3.52	1.39	0.95	1.92	93	148	159	70	47	95	2.086	1.061	0.00169187	0.0218119	up	NW_018744616.1	4901152	4906526	-	LOC110700077	--	K14050 geranylgeranyl transferase type-2 subunit alpha [EC:2.5.1.60] | (RefSeq) geranylgeranyl transferase type-2 subunit alpha 1-like (A)	geranylgeranyl transferase type-2 subunit alpha 1-like [Chenopodium quinoa]	RecName: Full=Geranylgeranyl transferase type-2 subunit alpha 1 {ECO:0000305}; EC=2.5.1.60 {ECO:0000269|PubMed:26589801}; AltName: Full=Geranylgeranyl transferase type II subunit alpha 1 {ECO:0000305}; AltName: Full=Rab geranylgeranyl transferase alpha subunit 1 {ECO:0000303|PubMed:26589801}; Short=AtRGTA1 {ECO:0000303|PubMed:26589801}; Short=Rab-GGT alpha 1 {ECO:0000305};	SubName: Full=Uncharacterized protein {ECO:0000313|EMBL:KNA10205.1}; Flags: Fragment;	Protein geranylgeranyltransferase type II, alpha subunit	GO:0005829,cytosol; GO:0005968,Rab-protein geranylgeranyltransferase complex; GO:0004663,Rab geranylgeranyltransferase activity; GO:0018344,protein geranylgeranylation; GO:0046686,response to cadmium ion	Protein prenyltransferase alpha subunit repeat
gene-LOC110700143	0.73	0.01	0.56	0	0	0.02	71	1	48	0	0	2	75.411	6.237	0.000171127	0.00332701	up	NW_018744620.1	826712	851961	-	LOC110700143	--	--	uncharacterized protein LOC110700143 isoform X1 [Chenopodium quinoa]	--	SubName: Full=Uncharacterized protein {ECO:0000313|EMBL:KNA15582.1}; Flags: Fragment;	--	--	--
gene-LOC110700154	18.23	36.44	40.27	6.13	9.18	17.7	534	1045	1039	176	259	500	3.117	1.64	3.0472e-05	0.000743404	up	NW_018744620.1	1180020	1181456	-	LOC110700154	--	--	protein E6-like [Chenopodium quinoa]	--	SubName: Full=Uncharacterized protein {ECO:0000313|EMBL:KNA15890.1};	--	--	--
gene-LOC110700163	1.79	0.6	1.44	0.32	0.25	0.43	52	17	37	9	7	12	4.293	2.102	0.00161513	0.0210652	up	NW_018744620.1	1523584	1537087	-	LOC110700163	--	--	--	--	--	--	--	--
gene-LOC110700298	3.2	3.77	4.06	1.79	1.86	1.76	168	194	188	92	94	89	2.13	1.091	0.000159665	0.00312859	up	NW_018744626.1	587557	598004	-	LOC110700298	--	K03549 KUP system potassium uptake protein | (RefSeq) potassium transporter 8-like isoform X1 (A)	uncharacterized protein LOC110700298 [Chenopodium quinoa]	RecName: Full=Chorismate mutase 1, chloroplastic; Short=AtCM1; EC=5.4.99.5; AltName: Full=CM-1; Flags: Precursor;	SubName: Full=Uncharacterized protein {ECO:0000313|EMBL:KNA18283.1};	--	GO:0009507,chloroplast; GO:0005829,cytosol; GO:0004106,chorismate mutase activity; GO:0016688,L-ascorbate peroxidase activity; GO:0009073,aromatic amino acid family biosynthetic process; GO:0046417,chorismate metabolic process	NHL repeat
gene-LOC110700354	2.13	2.88	2.11	0.29	0.49	0.37	189	251	165	25	42	32	6.402	2.678	1.05245e-12	1.12026e-10	up	NW_018744626.1	1201849	1206374	+	LOC110700354	--	K13420 LRR receptor-like serine/threonine-protein kinase FLS2 [EC:2.7.11.1] | (RefSeq) LRR receptor-like serine/threonine-protein kinase FLS2 (A)	LRR receptor-like serine/threonine-protein kinase [Chenopodium quinoa]	RecName: Full=LRR receptor-like serine/threonine-protein kinase {ECO:0000305}; EC=2.7.11.1 {ECO:0000305}; AltName: Full=LRR receptor-like serine/threonine-protein kinase At4g26540 {ECO:0000305}; AltName: Full=Protein RECEPTOR OF RGF1 {ECO:0000303|PubMed:27229311}; AltName: Full=Protein RGF1 INSENSITIVE 3 {ECO:0000303|PubMed:27229312}; Flags: Precursor;	SubName: Full=Uncharacterized protein {ECO:0000313|EMBL:KNA09672.1};	--	GO:0016021,integral component of membrane; GO:0005886,plasma membrane; GO:0005524,ATP binding; GO:0004674,protein serine/threonine kinase activity	Leucine rich repeat
gene-LOC110700383	3.24	3.42	2.52	1.38	1.37	1.29	86	89	59	36	35	33	2.395	1.26	0.0010149	0.014524	up	NW_018744626.1	1525082	1529810	-	LOC110700383	--	K23978 isoamyl acetate esterase [EC:3.1.1.112] | (RefSeq) GDSL esterase/lipase At5g62930-like (A)	GDSL esterase/lipase At5g62930-like [Chenopodium quinoa]	RecName: Full=GDSL esterase/lipase At5g62930; EC=3.1.1.-;	SubName: Full=Uncharacterized protein {ECO:0000313|EMBL:KNA25747.1};	Isoamyl acetate-hydrolyzing esterase	GO:0005829,cytosol; GO:0016788,hydrolase activity, acting on ester bonds; GO:0016042,lipid catabolic process	GDSL-like Lipase/Acylhydrolase
gene-LOC110700394	92.9	86.75	86.19	29.89	15.07	30.3	2431	2223	1987	767	380	765	3.857	1.947	3.78251e-12	3.61945e-10	up	NW_018744626.1	1676206	1677489	+	LOC110700394	--	--	uncharacterized protein LOC110700394 [Chenopodium quinoa]	--	SubName: Full=Uncharacterized protein {ECO:0000313|EMBL:KNA25044.1};	--	--	Protein of unknown function (DUF1645)
gene-LOC110700436	3.83	1.15	4.21	0.26	0.11	0.32	150	44	145	10	4	12	15.121	3.919	3.51178e-09	2.07538e-07	up	NW_018744626.1	2220069	2223636	+	LOC110700436	--	K21483 salicylate 1-O-methyltransferase [EC:2.1.1.274] | (RefSeq) salicylate carboxymethyltransferase-like (A)	salicylate carboxymethyltransferase-like [Chenopodium quinoa]	RecName: Full=Salicylate carboxymethyltransferase; EC=2.1.1.274; AltName: Full=S-adenosyl-L-methionine:salicylate acid carboxylmethyltransferase; Short=CbSAMT; AltName: Full=Salicylate O-methyltransferase;	SubName: Full=Uncharacterized protein {ECO:0000313|EMBL:KNA17621.1};	--	GO:0046872,metal ion binding; GO:0008168,methyltransferase activity	SAM dependent carboxyl methyltransferase
gene-LOC110700445	9.59	6.83	6.25	2.54	3.3	5.71	235	164	135	61	78	135	2.185	1.127	0.00346401	0.0383074	up	NW_018744626.1	2412313	2413992	+	LOC110700445	--	--	probable serine/threonine-protein kinase samkA [Chenopodium quinoa]	--	SubName: Full=Uncharacterized protein {ECO:0000313|EMBL:KNA23059.1};	--	--	Domain of unknown function (DUF4228)
gene-LOC110700496	100.58	142.61	81.24	23.47	12.68	23.4	1359	1887	967	311	165	305	5.851	2.549	1.10982e-16	2.02933e-14	up	NW_018744626.1	3146367	3147736	-	LOC110700496	--	--	defensin D2-like [Chenopodium quinoa]	RecName: Full=Defensin D2; AltName: Full=Antimicrobial peptide D2; AltName: Full=So-D2; Flags: Fragment;	SubName: Full=Uncharacterized protein {ECO:0000313|EMBL:KNA12297.1};	--	GO:0005618,cell wall; GO:0005576,extracellular region; GO:0042742,defense response to bacterium; GO:0050832,defense response to fungus; GO:0031640,killing of cells of other organism	Gamma-thionin family
gene-LOC110700512	1.53	1.41	1.42	0.34	0.78	0.59	142	128	116	31	70	53	2.645	1.403	0.00141418	0.0190357	up	NW_018744626.1	3321123	3329115	-	LOC110700512	--	--	protein NUCLEAR FUSION DEFECTIVE 4-like [Chenopodium quinoa]	RecName: Full=Protein NUCLEAR FUSION DEFECTIVE 4 {ECO:0000303|PubMed:16698901};	SubName: Full=Uncharacterized protein {ECO:0000313|EMBL:KNA23439.1};	--	GO:0016021,integral component of membrane; GO:0000741,karyogamy; GO:0010197,polar nucleus fusion; GO:0009651,response to salt stress	Nodulin-like
gene-LOC110700515	8.4	10.69	6.09	3.74	3.21	1.19	321	400	205	140	118	44	3.077	1.622	0.00230823	0.027789	up	NW_018744626.1	3332500	3338964	-	LOC110700515	--	--	uncharacterized protein LOC110700515 [Chenopodium quinoa]	RecName: Full=Protein NUCLEAR FUSION DEFECTIVE 4 {ECO:0000303|PubMed:16698901};	SubName: Full=Uncharacterized protein {ECO:0000313|EMBL:KNA08681.1};	--	GO:0016021,integral component of membrane; GO:0000741,karyogamy; GO:0010197,polar nucleus fusion; GO:0009651,response to salt stress	Nodulin-like
gene-LOC110700537	127.92	109.44	139.48	0	0.05	0	2435	2040	2339	0	1	0	6901.17	12.753	6.34004e-26	3.6027e-23	up	NW_018744626.1	3582765	3584368	+	LOC110700537	--	--	uncharacterized protein LOC110700537 [Chenopodium quinoa]	--	SubName: Full=Uncharacterized protein {ECO:0000313|EMBL:KNA14362.1};	--	GO:0016021,integral component of membrane	Protein of unknown function (DUF1118)
gene-LOC110700545	0.47	0.39	0.2	0.05	0.05	0.07	21	17	8	2	2	3	7.194	2.847	0.00192362	0.0241669	up	NW_018744626.1	3649519	3655837	-	LOC110700545	--	K13993 HSP20 family protein | (RefSeq) 22.0 kDa class IV heat shock protein-like (A)	uncharacterized protein LOC110700545 [Chenopodium quinoa]	RecName: Full=17.9 kDa class II heat shock protein;	SubName: Full=Uncharacterized protein {ECO:0000313|EMBL:KNA23798.1};	Molecular chaperone (small heat-shock protein Hsp26/Hsp42)	GO:0005737,cytoplasm	Hsp20/alpha crystallin family
gene-LOC110700571	4.15	10.55	5.43	2.06	1.67	4.48	191	475	220	93	74	199	2.675	1.42	0.000627817	0.0098342	up	NW_018744626.1	3946615	3948871	-	LOC110700571	--	K16221 transcription factor TCP21 (protein CCA1 HIKING EXPEDITION) | (RefSeq) transcription factor TCP7 (A)	transcription factor TCP14-like [Chenopodium quinoa]	RecName: Full=Transcription factor TCP15;	SubName: Full=Uncharacterized protein {ECO:0000313|EMBL:KNA09198.1};	--	GO:0005634,nucleus; GO:0003677,DNA binding; GO:0003700,DNA-binding transcription factor activity; GO:0010252,auxin homeostasis; GO:0008283,cell proliferation; GO:0007623,circadian rhythm; GO:0042023,DNA endoreduplication; GO:0048467,gynoecium development; GO:0010229,inflorescence development; GO:0031540,regulation of anthocyanin biosynthetic process; GO:0006355,regulation of transcription, DNA-te…	TCP family transcription factor
gene-LOC110700586	7.19	9.18	6.66	1.14	1.56	1.29	168	210	137	26	35	29	6.041	2.595	3.77536e-13	4.26442e-11	up	NW_018744626.1	4127270	4129145	-	LOC110700586	--	--	--	--	--	--	--	--
gene-LOC110700652	4.24	3.22	3.45	1.45	0.76	1.91	272	202	195	91	47	118	2.956	1.564	8.94363e-06	0.000253136	up	NW_018744626.1	5159306	5164324	+	LOC110700652	--	--	uncharacterized protein LOC110700652 [Chenopodium quinoa]	--	SubName: Full=Uncharacterized protein {ECO:0000313|EMBL:KNA17648.1};	--	--	Plant protein of unknown function (DUF863)
gene-LOC110700658	17.88	17.88	13.48	7.25	9.45	8.71	870	852	578	346	443	409	2.033	1.023	0.000791247	0.0118899	up	NW_018744626.1	5191371	5195661	-	LOC110700658	--	K12126 phytochrome-interacting factor 3 | (RefSeq) phytochrome-interacting factor 3.1 (A)	transcription factor PIF7-like [Chenopodium quinoa]	RecName: Full=Transcription factor UNE10; AltName: Full=Basic helix-loop-helix protein 16; Short=AtbHLH16; Short=bHLH 16; AltName: Full=Protein UNFERTILIZED EMBRYO SAC 10; AltName: Full=Transcription factor EN 108; AltName: Full=bHLH transcription factor bHLH016;	SubName: Full=Uncharacterized protein {ECO:0000313|EMBL:KNA08762.1};	--	GO:0005634,nucleus; GO:0009506,plasmodesma; GO:0003677,DNA binding; GO:0003700,DNA-binding transcription factor activity; GO:0046983,protein dimerization activity; GO:0009567,double fertilization forming a zygote and endosperm; GO:0006355,regulation of transcription, DNA-templated; GO:0006351,transcription, DNA-templated	Helix-loop-helix DNA-binding domain
gene-LOC110700701	3.43	3.12	3.47	1.35	1.57	2.18	111	99	99	43	49	68	2.119	1.084	0.000687018	0.0106041	up	NW_018744626.1	5960595	5967279	+	LOC110700701	--	K01079 phosphoserine phosphatase [EC:3.1.3.3] | (RefSeq) phosphoserine phosphatase, chloroplastic-like (A)	phosphoserine phosphatase, chloroplastic-like [Chenopodium quinoa]	RecName: Full=Phosphoserine phosphatase, chloroplastic; Short=PSP; Short=PSPase; EC=3.1.3.3; AltName: Full=O-phosphoserine phosphohydrolase; Flags: Precursor;	SubName: Full=Uncharacterized protein {ECO:0000313|EMBL:KNA24817.1};	Phosphoserine phosphatase	GO:0009507,chloroplast; GO:0005509,calcium ion binding; GO:0000287,magnesium ion binding; GO:0004647,phosphoserine phosphatase activity; GO:0009793,embryo development ending in seed dormancy; GO:0006564,L-serine biosynthetic process; GO:0006563,L-serine metabolic process; GO:0009555,pollen development; GO:0048364,root development	haloacid dehalogenase-like hydrolase
gene-LOC110700790	0.77	0.59	0.46	0	0.04	0	80	60	42	0	4	0	46.937	5.553	1.03063e-08	5.6064e-07	up	NW_018742390.1	8390916	8400021	+	LOC110700790	--	--	--	--	--	--	--	--
gene-LOC110700862	94.11	227.71	119.22	50.81	41.68	53.83	3251	7703	3628	1721	1387	1794	3.122	1.642	4.00556e-07	1.6099e-05	up	NW_018744626.1	1789640	1795832	-	LOC110700862	--	K13366 polyamine oxidase [EC:1.5.3.14 1.5.3.16 1.5.3.-] | (RefSeq) polyamine oxidase-like (A)	polyamine oxidase-like [Chenopodium quinoa]	RecName: Full=Polyamine oxidase; EC=1.5.3.14; EC=1.5.3.15; Flags: Precursor;	SubName: Full=Polyamine oxidase {ECO:0000313|EMBL:AAM43922.1}; EC=1.4.3.4 {ECO:0000313|EMBL:AAM43922.1};	Amine oxidase	GO:0052898,N1-acetylspermidine:oxygen oxidoreductase (propane-1,3-diamine-forming) activity; GO:0052893,N1-acetylspermine:oxygen oxidoreductase (propane-1,3-diamine-forming) activity; GO:0052897,N8-acetylspermidine:oxygen oxidoreductase (propane-1,3-diamine-forming) activity; GO:0052896,spermidine oxidase (propane-1,3-diamine-forming) activity; GO:0052900,spermine oxidase (propane-1,3-diamine-for…	Flavin containing amine oxidoreductase
gene-LOC110700869	1.79	5.28	4.37	1.15	0.88	0.39	19	55	41	12	9	4	4.681	2.227	0.00133191	0.0181133	up	NW_018744626.1	1941641	1942162	+	LOC110700869	--	K15692 E3 ubiquitin-protein ligase RNF13 [EC:2.3.2.27] | (RefSeq) RING-H2 finger protein ATL74-like (A)	RING-H2 finger protein ATL65-like [Chenopodium quinoa]	RecName: Full=RING-H2 finger protein ATL65; EC=2.3.2.27 {ECO:0000305}; AltName: Full=RING-type E3 ubiquitin transferase ATL65 {ECO:0000305};	SubName: Full=Uncharacterized protein {ECO:0000313|EMBL:KNA11845.1};	FOG: Predicted E3 ubiquitin ligase	GO:0016021,integral component of membrane; GO:0046872,metal ion binding; GO:0061630,ubiquitin protein ligase activity; GO:0043161,proteasome-mediated ubiquitin-dependent protein catabolic process	Ring finger domain
gene-LOC110700941	3.53	3.72	5.17	1.07	0.8	2.09	128	132	165	38	28	73	3.471	1.795	9.08821e-07	3.35682e-05	up	NW_018744633.1	1972824	1976564	+	LOC110700941	--	--	--	--	--	--	--	--
gene-LOC110700949	23.34	25.94	24.74	10.54	12.1	13.28	847	922	791	375	423	465	2.174	1.12	4.55664e-07	1.8039e-05	up	NW_018742204.1	2047991	2059414	+	LOC110700949	--	K23544 serine incorporator 1/3 | (RefSeq) probable serine incorporator (A)	probable serine incorporator [Chenopodium quinoa]	--	SubName: Full=Uncharacterized protein {ECO:0000313|EMBL:KNA12416.1};	Tumor differentially expressed (TDE) protein	GO:0016021,integral component of membrane	Serine incorporator (Serinc)
gene-LOC110700957	2.4	3.29	2.76	0.43	0.63	0.55	91	122	92	16	23	20	5.492	2.457	1.88757e-10	1.40281e-08	up	NW_018744633.1	2487682	2508960	+	LOC110700957	--	K00253 isovaleryl-CoA dehydrogenase [EC:1.3.8.4] | (RefSeq) isovaleryl-CoA dehydrogenase, mitochondrial-like (A)	isovaleryl-CoA dehydrogenase, mitochondrial-like [Chenopodium quinoa]	RecName: Full=Isovaleryl-CoA dehydrogenase, mitochondrial; Short=IVD; EC=1.3.8.4; AltName: Full=Isovaleryl-CoA dehydrogenase 2; Short=St-IVD2; Flags: Precursor;	SubName: Full=Uncharacterized protein {ECO:0000313|EMBL:KNA06144.1};	Isovaleryl-CoA dehydrogenase	GO:0005739,mitochondrion; GO:0050660,flavin adenine dinucleotide binding; GO:0008470,isovaleryl-CoA dehydrogenase activity; GO:1902198,3-methylbut-2-enoyl-CoA(4-) metabolic process; GO:1902196,isovaleryl-CoA(4-) catabolic process; GO:0006552,leucine catabolic process	Acyl-CoA dehydrogenase, C-terminal domain
gene-LOC110700990	9.06	9.16	11.04	3.06	4	8.79	600	594	644	199	255	562	2.061	1.043	0.00248106	0.0294307	up	NW_018744633.1	2900125	2905972	+	LOC110700990	--	K01640 hydroxymethylglutaryl-CoA lyase [EC:4.1.3.4] | (RefSeq) LOW QUALITY PROTEIN: hydroxymethylglutaryl-CoA lyase, mitochondrial (A)	F-box protein At2g32560-like isoform X1 [Chenopodium quinoa]	RecName: Full=F-box protein At2g32560;	SubName: Full=Uncharacterized protein {ECO:0000313|EMBL:KNA18413.1};	--	--	F-box domain
gene-LOC110701000	2.53	2.36	3.71	0.98	1.22	0.41	58	53	75	22	27	9	3.292	1.719	0.00385251	0.0411975	up	NW_018744633.1	2998049	3000410	-	LOC110701000	--	K11886 proteasome component ECM29 | (RefSeq) proteasome-associated protein ECM29 homolog (A)	blue copper protein-like [Chenopodium quinoa]	RecName: Full=Cucumber peeling cupredoxin; Short=CPC; AltName: Full=Stellacyanin;	SubName: Full=Uncharacterized protein {ECO:0000313|EMBL:KNA24350.1};	--	GO:0009055,electron transfer activity; GO:0046872,metal ion binding	Plastocyanin-like domain
gene-LOC110701113	0.39	1.24	0.71	0.23	0.29	0.32	38	117	60	22	27	30	2.843	1.507	0.00233342	0.0280284	up	NW_018744633.1	4046343	4055599	+	LOC110701113	--	--	--	--	--	--	--	--
gene-LOC110701118	2.78	2.42	3.05	0.62	0.35	1.09	114	97	110	25	14	43	4.457	2.156	9.71944e-08	4.39409e-06	up	NW_018744633.1	3966112	3972345	+	LOC110701118	--	K20860 FMN hydrolase / 5-amino-6-(5-phospho-D-ribitylamino)uracil phosphatase [EC:3.1.3.102 3.1.3.104] | (RefSeq) flavin mononucleotide hydrolase 1, chloroplatic-like (A)	flavin mononucleotide hydrolase 1, chloroplatic-like [Chenopodium quinoa]	RecName: Full=Flavin mononucleotide hydrolase 1, chloroplatic {ECO:0000303|PubMed:22002057}; Short=AtcpFHy1 {ECO:0000303|PubMed:22002057}; EC=3.1.3.102 {ECO:0000269|PubMed:22002057}; AltName: Full=5-amino-6-(5-phospho-D-ribitylamino)uracil phosphatase {ECO:0000305|PubMed:27490826}; Short=AtcpFHy1/PyrP1 {ECO:0000303|PubMed:27490826}; EC=3.1.3.104 {ECO:0000269|PubMed:24123841, ECO:0000269|PubMed:27…	SubName: Full=Uncharacterized protein {ECO:0000313|EMBL:KNA16317.1};	Predicted hydrolase (HAD superfamily)	GO:0009507,chloroplast; GO:0009570,chloroplast stroma; GO:0090711,FMN hydrolase activity; GO:0043621,protein self-association; GO:0009231,riboflavin biosynthetic process	Haloacid dehalogenase-like hydrolase
gene-LOC110701124	0.25	0.82	0.29	0	0	0	15	47	15	0	0	0	144.394	7.174	7.91805e-07	2.97217e-05	up	NW_018744633.1	4087327	4091718	+	LOC110701124	--	K05391 cyclic nucleotide gated channel, plant | (RefSeq) cyclic nucleotide-gated ion channel 1-like (A)	wall-associated receptor kinase-like 8 [Chenopodium quinoa]	RecName: Full=Wall-associated receptor kinase 2; EC=2.7.11.-; Flags: Precursor;	SubName: Full=Uncharacterized protein {ECO:0000313|EMBL:KNA06572.1};	--	GO:0005623,cell; GO:0016021,integral component of membrane; GO:0005524,ATP binding; GO:0005509,calcium ion binding; GO:0030247,polysaccharide binding; GO:0004674,protein serine/threonine kinase activity; GO:0007166,cell surface receptor signaling pathway; GO:0009992,cellular water homeostasis; GO:0009311,oligosaccharide metabolic process; GO:0009751,response to salicylic acid; GO:0009826,unidimen…	Protein kinase domain
gene-LOC110701138	0.43	1.01	1.2	0.06	0	0.06	14	32	34	2	0	2	22.086	4.465	8.67246e-06	0.000246552	up	NW_018744633.1	4190193	4191947	+	LOC110701138	--	K11843 ubiquitin carboxyl-terminal hydrolase 14 [EC:3.4.19.12] | (RefSeq) FBD-associated F-box protein At4g10400-like (A)	putative FBD-associated F-box protein At5g53635 [Chenopodium quinoa]	RecName: Full=Putative FBD-associated F-box protein At5g53635;	SubName: Full=Uncharacterized protein {ECO:0000313|EMBL:KNA24141.1};	--	--	F-box domain
gene-LOC110701154	0.49	0.5	0.41	0	0	0	19	19	14	0	0	0	101.511	6.665	3.05011e-06	9.80496e-05	up	NW_018744633.1	4301196	4304129	-	LOC110701154	--	--	--	--	--	--	--	--
gene-LOC110701306	4.52	7.67	7.37	2.47	1.18	2.74	222	369	319	119	56	130	3.289	1.718	1.61011e-07	6.97196e-06	up	NW_018744633.1	6055418	6063511	-	LOC110701306	--	K12309 beta-galactosidase [EC:3.2.1.23] | (RefSeq) hypothetical protein (A)	beta-galactosidase 6 [Chenopodium quinoa]	RecName: Full=Beta-galactosidase 6; Short=Lactase 6; EC=3.2.1.23; Flags: Precursor;	RecName: Full=Beta-galactosidase {ECO:0000256|RuleBase:RU000675}; EC=3.2.1.23 {ECO:0000256|RuleBase:RU000675};	Beta-galactosidase	GO:0048046,apoplast; GO:0005618,cell wall; GO:0005773,vacuole; GO:0004565,beta-galactosidase activity; GO:0005975,carbohydrate metabolic process; GO:0048354,mucilage biosynthetic process involved in seed coat development; GO:0009827,plant-type cell wall modification	Glycosyl hydrolases family 35
gene-LOC110701367	1.9	0.57	0.52	0	0	0	58	17	14	0	0	0	179.344	7.487	6.82021e-07	2.5997e-05	up	NW_018744633.1	6802929	6806266	+	LOC110701367	--	--	--	--	--	--	--	--
gene-LOC110701395	1.7	2.3	2.58	0.63	0.81	1.06	83	110	111	30	38	50	2.801	1.486	1.25665e-05	0.000343311	up	NW_018744633.1	7054355	7057974	+	LOC110701395	--	K19525 vacuolar protein sorting-associated protein 13A/C | (RefSeq) hypothetical protein (A)	uncharacterized protein LOC110701395 [Chenopodium quinoa]	--	SubName: Full=Uncharacterized protein {ECO:0000313|EMBL:KNA07807.1};	--	--	Vacuolar protein sorting-associated protein 62
gene-LOC110701416	0.5	0.53	0.6	0.14	0.11	0.12	29	30	31	8	6	7	4.649	2.217	9.97356e-05	0.0020919	up	NW_018744633.1	7380134	7382987	-	LOC110701416	--	K17710 pentatricopeptide repeat domain-containing protein 1 | (RefSeq) pentatricopeptide repeat-containing protein At1g12300, mitochondrial-like (A)	putative pentatricopeptide repeat-containing protein At1g12700, mitochondrial [Chenopodium quinoa]	RecName: Full=Putative pentatricopeptide repeat-containing protein At1g12700, mitochondrial; Flags: Precursor;	SubName: Full=Uncharacterized protein {ECO:0000313|EMBL:KNA03660.1}; Flags: Fragment;	FOG: PPR repeat	GO:0005739,mitochondrion; GO:0004519,endonuclease activity; GO:0003723,RNA binding; GO:0080156,mitochondrial mRNA modification; GO:0006397,mRNA processing	PPR repeat family
gene-LOC110701493	5.48	5.18	3.28	1.82	1.15	3.28	286	265	151	93	58	165	2.521	1.334	0.000599086	0.00947254	up	NW_018744633.1	7368792	7378105	+	LOC110701493	--	K03126 transcription initiation factor TFIID subunit 12 | (RefSeq) transcription initiation factor TFIID subunit 12b-like (A)	transcription initiation factor TFIID subunit 12b-like, partial [Chenopodium quinoa]	RecName: Full=Transcription initiation factor TFIID subunit 12b; AltName: Full=Protein CYTOKININ-HYPERSENSITIVE 1; AltName: Full=Protein ENHANCED ETHYLENE RESPONSE 4; AltName: Full=TBP-associated factor 12b; Short=AtTAF12b;	SubName: Full=Uncharacterized protein {ECO:0000313|EMBL:KNA14254.1};	Transcription initiation factor TFIID, subunit TAF12 (also component of histone acetyltransferase SAGA)	GO:0005669,transcription factor TFIID complex; GO:0046982,protein heterodimerization activity; GO:0006352,DNA-templated transcription, initiation; GO:0006355,regulation of transcription, DNA-templated	Transcription initiation factor TFIID subunit A
gene-LOC110701517	19.72	6.6	9.06	0.17	1.81	0.62	598	196	242	5	53	18	13.896	3.797	2.41975e-06	7.94451e-05	up	NW_018744633.1	5586215	5589764	-	LOC110701517	--	K05282 gibberellin-44 dioxygenase [EC:1.14.11.12] | (RefSeq) gibberellin 20 oxidase 2 (A)	gibberellin 20 oxidase 1-like isoform X1 [Chenopodium quinoa]	RecName: Full=Gibberellin 20 oxidase 2; EC=1.14.11.-; AltName: Full=GA 20-oxidase 2; AltName: Full=Gibberellin C-20 oxidase 2;	SubName: Full=GA 20-oxidase {ECO:0000313|EMBL:ABQ52488.1};	Iron/ascorbate family oxidoreductases	GO:0045544,gibberellin 20-oxidase activity; GO:0046872,metal ion binding; GO:0009908,flower development; GO:0009740,gibberellic acid mediated signaling pathway; GO:0009686,gibberellin biosynthetic process; GO:0009739,response to gibberellin; GO:0080167,response to karrikin; GO:0009639,response to red or far red light; GO:0009826,unidimensional cell growth	2OG-Fe(II) oxygenase superfamily
gene-LOC110701537	0.49	0.25	0.44	0	0.05	0	10	5	8	0	1	0	23.553	4.558	0.00478989	0.0484446	up	NW_018744633.1	196234	230007	+	LOC110701537	--	--	--	--	--	--	--	--
gene-LOC110701556	0.42	0.02	0.97	0.02	0	0	23	1	47	1	0	0	74.965	6.228	0.000358716	0.00619427	up	NW_018742393.1	1521881	1526305	+	LOC110701556	--	--	uncharacterized protein LOC110701556 [Chenopodium quinoa]	--	SubName: Full=Uncharacterized protein {ECO:0000313|EMBL:PHT56949.1};	--	--	--
gene-LOC110701632	9.94	0.04	3.7	0	0	0	232	1	76	0	0	0	642.88	9.328	0.000793175	0.0119059	up	NW_018744641.1	31353	34891	-	LOC110701632	--	K00434 L-ascorbate peroxidase [EC:1.11.1.11] | (RefSeq) L-ascorbate peroxidase 3-like (A)	L-ascorbate peroxidase 3-like [Chenopodium quinoa]	RecName: Full=L-ascorbate peroxidase 3; Short=AtAPx03; EC=1.11.1.11;	SubName: Full=Uncharacterized protein {ECO:0000313|EMBL:KNA25519.1};	--	GO:0009507,chloroplast; GO:0009941,chloroplast envelope; GO:0046861,glyoxysomal membrane; GO:0016021,integral component of membrane; GO:0005739,mitochondrion; GO:0005778,peroxisomal membrane; GO:0005777,peroxisome; GO:0009506,plasmodesma; GO:0009536,plastid; GO:0005774,vacuolar membrane; GO:0005773,vacuole; GO:0004130,cytochrome-c peroxidase activity; GO:0020037,heme binding; GO:0016688,L-ascorba…	Peroxidase
gene-LOC110701684	1.51	2.4	2.01	0	0	0	47	73	55	0	0	0	338.475	8.403	3.77045e-11	3.1086e-09	up	NW_018744647.1	1863375	1885734	+	LOC110701684	--	K09250 cellular nucleic acid-binding protein | (RefSeq) cellular nucleic acid-binding protein homolog isoform X1 (A)	cellular nucleic acid-binding protein homolog isoform X1 [Chenopodium quinoa]	RecName: Full=Cold shock protein 1; Short=AtCSP1; AltName: Full=Cold shock domain-containing protein 1;	SubName: Full=Uncharacterized protein {ECO:0000313|EMBL:KNA13855.1};	E3 ubiquitin ligase interacting with arginine methyltransferase	GO:0005737,cytoplasm; GO:0005634,nucleus; GO:0003690,double-stranded DNA binding; GO:0003729,mRNA binding; GO:0003723,RNA binding; GO:0003697,single-stranded DNA binding; GO:0008270,zinc ion binding; GO:0009631,cold acclimation; GO:0032508,DNA duplex unwinding; GO:0006355,regulation of transcription, DNA-templated; GO:0009409,response to cold; GO:0009651,response to salt stress; GO:0009414,respon…	Zinc knuckle
gene-LOC110701742	0.76	0.99	0.24	0	0	0	33	42	9	0	0	0	160.788	7.329	6.1997e-07	2.3779e-05	up	NW_018744656.1	472320	481304	+	LOC110701742	--	K14487 auxin responsive GH3 gene family | (RefSeq) probable indole-3-acetic acid-amido synthetase GH3.1 (A)	probable indole-3-acetic acid-amido synthetase GH3.1 [Chenopodium quinoa]	RecName: Full=Probable indole-3-acetic acid-amido synthetase GH3.1; EC=6.3.2.-; AltName: Full=Auxin-responsive GH3-like protein 1; Short=AtGH3-1;	SubName: Full=Putative indole-3-acetic acid-amido synthetase GH3.1 {ECO:0000313|EMBL:KYP48307.1};	--	GO:0016874,ligase activity; GO:0009733,response to auxin	GH3 auxin-responsive promoter
gene-LOC110701743	1.89	3.15	1.06	0.68	0.63	1.13	71	116	35	25	23	41	2.692	1.429	0.00405436	0.0428842	up	NW_018744656.1	483714	486290	+	LOC110701743	--	K14487 auxin responsive GH3 gene family | (RefSeq) probable indole-3-acetic acid-amido synthetase GH3.1 (A)	probable indole-3-acetic acid-amido synthetase GH3.1 [Chenopodium quinoa]	RecName: Full=Probable indole-3-acetic acid-amido synthetase GH3.1; EC=6.3.2.-; AltName: Full=Auxin-responsive GH3-like protein 1; Short=AtGH3-1;	SubName: Full=probable indole-3-acetic acid-amido synthetase GH3.1 {ECO:0000313|RefSeq:XP_016466293.1};	--	GO:0016874,ligase activity; GO:0009733,response to auxin	GH3 auxin-responsive promoter
gene-LOC110701756	0.08	0.34	0.1	0	0	0	4	16	4	0	0	0	44.629	5.48	0.00247753	0.0294056	up	NW_018744656.1	605024	609331	-	LOC110701756	--	--	--	--	--	--	--	--
gene-LOC110701760	3.69	4.9	4.7	1.35	1.7	2.09	117	152	131	42	52	64	2.735	1.452	1.0693e-06	3.83453e-05	up	NW_018744656.1	643746	645299	+	LOC110701760	--	--	probable serine/threonine-protein kinase irlA [Chenopodium quinoa]	--	SubName: Full=Uncharacterized protein {ECO:0000313|EMBL:KNA15231.1};	--	--	--
gene-LOC110701762	1.13	1.71	1.94	0	0	0	75	111	113	0	0	0	581.955	9.185	1.97302e-13	2.30618e-11	up	NW_018744656.1	669049	677622	-	LOC110701762	--	--	--	--	--	--	--	--
gene-LOC110701859	0.72	0.94	0.36	0	0.04	0	18	23	8	0	1	0	48.385	5.596	0.000127384	0.00258662	up	NW_018744662.1	3924031	3927360	+	LOC110701859	--	--	ribosome-inactivating protein PD-L1/PD-L2-like [Chenopodium quinoa]	RecName: Full=Ribosome-inactivating protein PD-L1/PD-L2 {ECO:0000303|PubMed:10213004}; EC=3.2.2.22; AltName: Full=rRNA N-glycosidase PD-L1/PD-L2 {ECO:0000303|PubMed:10213004};	RecName: Full=rRNA N-glycosidase {ECO:0000256|RuleBase:RU004915}; EC=3.2.2.22 {ECO:0000256|RuleBase:RU004915};	--	GO:0030598,rRNA N-glycosylase activity; GO:0090729,toxin activity; GO:0006952,defense response; GO:0017148,negative regulation of translation	Ribosome inactivating protein
gene-LOC110701868	0.47	0	0.43	0	0	0	24	0	19	0	0	0	89.033	6.476	0.00246111	0.029267	up	NW_018744662.1	4238798	4242369	-	LOC110701868	--	K17604 zinc finger SWIM domain-containing protein 3 | (RefSeq) protein FAR1-RELATED SEQUENCE 5-like (A)	protein FAR1-RELATED SEQUENCE 5-like [Chenopodium quinoa]	RecName: Full=Protein FAR1-RELATED SEQUENCE 5;	SubName: Full=Uncharacterized protein {ECO:0000313|EMBL:KCW84786.1}; Flags: Fragment;	--	GO:0005634,nucleus; GO:0008270,zinc ion binding; GO:0006355,regulation of transcription, DNA-templated	MULE transposase domain
gene-LOC110701912	1.17	0.99	0.81	0	0	0	77	64	47	0	0	0	368.686	8.526	3.03534e-11	2.54803e-09	up	NW_018744662.1	950306	955247	+	LOC110701912	--	--	--	--	--	--	--	--
gene-LOC110701952	2.02	2.28	1.48	0.97	0.68	0.68	68	75	44	32	22	22	2.615	1.387	0.00167836	0.0216918	up	NW_018744662.1	1561891	1568621	-	LOC110701952	--	K01052 lysosomal acid lipase/cholesteryl ester hydrolase [EC:3.1.1.13] | (RefSeq) triacylglycerol lipase 2-like (A)	triacylglycerol lipase 2-like [Chenopodium quinoa]	RecName: Full=Triacylglycerol lipase 2; EC=3.1.1.3; Flags: Precursor;	RecName: Full=Lipase {ECO:0000256|PIRNR:PIRNR000862};	Triglyceride lipase-cholesterol esterase	GO:0005576,extracellular region; GO:0016298,lipase activity; GO:0004806,triglyceride lipase activity; GO:0002213,defense response to insect; GO:0016042,lipid catabolic process	Prolyl oligopeptidase family
gene-LOC110701981	5.66	9.37	15.05	5.34	3.53	6.32	158	256	370	146	95	170	2.107	1.075	0.00475935	0.0482149	up	NW_018744662.1	1996100	2002237	-	LOC110701981	--	K02935 large subunit ribosomal protein L7/L12 | (RefSeq) uncharacterized protein LOC110701981 (A)	uncharacterized protein LOC110701981 [Chenopodium quinoa]	RecName: Full=50S ribosomal protein L12, chloroplastic {ECO:0000255|HAMAP-Rule:MF_00368};	SubName: Full=Uncharacterized protein {ECO:0000313|EMBL:KNA20623.1};	Mitochondrial/chloroplast ribosomal protein L12	GO:0009507,chloroplast; GO:0005840,ribosome; GO:0003735,structural constituent of ribosome; GO:0006412,translation	Ribosomal protein L7/L12 C-terminal domain
gene-LOC110702002	0.21	0.64	0.15	0	0	0	11	33	7	0	0	0	95.142	6.572	2.93056e-05	0.000718269	up	NW_018744662.1	2210458	2215879	-	LOC110702002	--	--	--	--	--	--	--	--
gene-LOC110702033	1.27	2.18	3.06	0	0	0	96	161	203	0	0	0	897.431	9.81	8.14455e-15	1.1352e-12	up	NW_018744662.1	2532313	2536448	-	LOC110702033	--	K20291 conserved oligomeric Golgi complex subunit 4 | (RefSeq) pentatricopeptide repeat-containing protein At4g01400, mitochondrial-like (A)	pentatricopeptide repeat-containing protein At1g61870, mitochondrial-like [Chenopodium quinoa]	RecName: Full=Pentatricopeptide repeat-containing protein At1g61870, mitochondrial; AltName: Full=Protein PENTATRICOPEPTIDE REPEAT 336; Flags: Precursor;	SubName: Full=Uncharacterized protein {ECO:0000313|EMBL:KNA14626.1};	FOG: PPR repeat	GO:0016020,membrane; GO:0005743,mitochondrial inner membrane; GO:0005739,mitochondrion; GO:0004519,endonuclease activity; GO:0000166,nucleotide binding; GO:0003723,RNA binding; GO:0009451,RNA modification	PPR repeat family
gene-LOC110702036	3.22	5.22	7.67	0.13	0.07	0	51	81	107	2	1	0	85.598	6.419	4.02682e-11	3.31258e-09	up	NW_018744662.1	2558036	2560589	+	LOC110702036	--	--	uncharacterized protein LOC110702036 [Chenopodium quinoa]	--	SubName: Full=Uncharacterized protein {ECO:0000313|EMBL:KZM89336.1};	--	--	--
gene-LOC110702086	5.87	4.81	7.97	3.32	3.35	2.91	238	191	285	132	131	114	2.029	1.021	0.00400894	0.0425256	up	NW_018744662.1	3292432	3298990	+	LOC110702086	--	K16297 serine carboxypeptidase-like clade II [EC:3.4.16.-] | (RefSeq) serine carboxypeptidase-like 34 (A)	serine carboxypeptidase-like 34 [Chenopodium quinoa]	RecName: Full=Serine carboxypeptidase-like 34; EC=3.4.16.-; Flags: Precursor;	RecName: Full=Carboxypeptidase {ECO:0000256|RuleBase:RU361156}; EC=3.4.16.- {ECO:0000256|RuleBase:RU361156}; Flags: Fragment;	Serine carboxypeptidases (lysosomal cathepsin A)	GO:0005576,extracellular region; GO:0009505,plant-type cell wall; GO:0005773,vacuole; GO:0004185,serine-type carboxypeptidase activity; GO:0051603,proteolysis involved in cellular protein catabolic process	Serine carboxypeptidase
gene-LOC110702130	7.39	6	5.79	2.27	2.31	1.65	306	243	211	92	92	66	3.205	1.68	8.94217e-06	0.000253136	up	NW_018742393.1	218099	222686	-	LOC110702130	--	K11996 adenylyltransferase and sulfurtransferase [EC:2.7.7.80 2.8.1.11] | (RefSeq) adenylyltransferase and sulfurtransferase MOCS3-like (A)	sulfite exporter TauE/SafE family protein 3-like isoform X1 [Chenopodium quinoa]	RecName: Full=Sulfite exporter TauE/SafE family protein 3 {ECO:0000312|EMBL:AEC07746.1};	SubName: Full=Uncharacterized protein {ECO:0000313|EMBL:KNA21758.1};	--	GO:0016021,integral component of membrane	Sulfite exporter TauE/SafE
gene-LOC110702135	9.81	5.05	6.53	2.17	3.02	1.97	341	172	200	74	101	66	3.137	1.65	0.000386254	0.00658664	up	NW_018744662.1	4113992	4116906	-	LOC110702135	--	--	uncharacterized protein LOC110702135 [Chenopodium quinoa]	--	SubName: Full=Uncharacterized protein {ECO:0000313|EMBL:KNA06461.1};	--	--	--
gene-LOC110702211	4.48	1.02	0.81	0.07	0.18	0	126	28	20	2	5	0	25.452	4.67	2.41924e-05	0.00061078	up	NW_018744676.1	390595	394051	+	LOC110702211	--	K19355 mannan endo-1,4-beta-mannosidase [EC:3.2.1.78] | (RefSeq) mannan endo-1,4-beta-mannosidase 7-like (A)	mannan endo-1,4-beta-mannosidase 7-like [Chenopodium quinoa]	RecName: Full=Mannan endo-1,4-beta-mannosidase 7; EC=3.2.1.78; AltName: Full=Beta-mannanase 7; AltName: Full=Endo-beta-1,4-mannanase 7; Short=AtMAN7; Flags: Precursor;	SubName: Full=Uncharacterized protein {ECO:0000313|EMBL:KNA12536.1};	--	GO:0071944,cell periphery; GO:0005576,extracellular region; GO:0016985,mannan endo-1,4-beta-mannosidase activity; GO:0046355,mannan catabolic process; GO:0009845,seed germination	Cellulase (glycosyl hydrolase family 5)
gene-LOC110702231	3.63	1.03	2.15	0.23	0.37	0	111	31	58	7	11	0	11.205	3.486	0.000352657	0.00611251	up	NW_018744676.1	260797	265329	-	LOC110702231	--	--	--	--	--	--	--	--
gene-LOC110702416	1.57	3.65	1.18	0.31	0.11	0.89	77	175	51	15	5	42	5.609	2.488	0.000234364	0.00435436	up	NW_018744693.1	217656	224691	-	LOC110702416	--	K01687 dihydroxy-acid dehydratase [EC:4.2.1.9] | (RefSeq) dihydroxy-acid dehydratase, chloroplastic-like (A)	dihydroxy-acid dehydratase, chloroplastic-like [Chenopodium quinoa]	RecName: Full=Dihydroxy-acid dehydratase, chloroplastic {ECO:0000255|HAMAP-Rule:MF_00012}; Short=AtDHAD {ECO:0000305}; Short=DAD {ECO:0000255|HAMAP-Rule:MF_00012}; EC=4.2.1.9 {ECO:0000255|HAMAP-Rule:MF_00012}; Flags: Precursor;	SubName: Full=Uncharacterized protein {ECO:0000313|EMBL:KNA24741.1};	Dihydroxy-acid dehydratase	GO:0009507,chloroplast; GO:0009570,chloroplast stroma; GO:0009536,plastid; GO:0051539,4 iron, 4 sulfur cluster binding; GO:0005507,copper ion binding; GO:0004160,dihydroxy-acid dehydratase activity; GO:0016836,hydro-lyase activity; GO:0009082,branched-chain amino acid biosynthetic process; GO:0009553,embryo sac development; GO:0009097,isoleucine biosynthetic process; GO:0009555,pollen development…	Dehydratase family
gene-LOC110702452	0.69	2.48	1.64	0	0	0	12	42	25	0	0	0	149.831	7.227	4.2713e-07	1.70556e-05	up	NW_018744693.1	709666	721975	+	LOC110702452	--	K00799 glutathione S-transferase [EC:2.5.1.18] | (RefSeq) glutathione S-transferase T1-like (A)	glutathione S-transferase T1-like [Chenopodium quinoa]	RecName: Full=Glutathione S-transferase T1; Short=AtGSTT1; EC=2.5.1.18; AltName: Full=GST class-theta member 1; AltName: Full=Glutathione S-transferase 10;	SubName: Full=Uncharacterized protein {ECO:0000313|EMBL:KNA10049.1};	Glutathione S-transferase	GO:0005737,cytoplasm; GO:0005634,nucleus; GO:0005777,peroxisome; GO:0004364,glutathione transferase activity; GO:0004601,peroxidase activity; GO:0006749,glutathione metabolic process; GO:0009407,toxin catabolic process	Glutathione S-transferase, N-terminal domain
gene-LOC110702468	40.96	44.6	81.95	20.6	28.03	26.63	813	867	1433	401	536	510	2.309	1.207	0.000792249	0.0119002	up	NW_018744693.1	910318	913448	-	LOC110702468	--	--	remorin-like [Chenopodium quinoa]	RecName: Full=Remorin; AltName: Full=DNA-binding protein;	SubName: Full=Uncharacterized protein {ECO:0000313|EMBL:KNA19891.1};	--	GO:0005886,plasma membrane	Remorin, C-terminal region
gene-LOC110702477	5.57	8.07	3.68	0	0.19	0.09	122	173	71	0	4	2	64.179	6.004	5.62867e-15	7.96554e-13	up	NW_018744693.1	1076335	1077408	+	LOC110702477	--	K12173 BRCA1-A complex subunit BRE | (RefSeq) BRCA1-A complex subunit BRE-like (A)	osmotin-like protein OSML13 [Chenopodium quinoa]	RecName: Full=Osmotin-like protein OSML13; AltName: Full=PA13; Flags: Precursor;	SubName: Full=Uncharacterized protein {ECO:0000313|EMBL:KNA04278.1};	--	--	Thaumatin family
gene-LOC110702486	105.27	70.07	55.55	40.03	30.39	46.99	4739	3089	2203	1767	1318	2041	2.164	1.113	0.00115829	0.0161788	up	NW_018744693.1	1210525	1212834	+	LOC110702486	--	K09419 heat shock transcription factor, other eukaryote | (RefSeq) heat stress transcription factor B-2b-like (A)	heat stress transcription factor B-2b-like [Chenopodium quinoa]	RecName: Full=Heat stress transcription factor B-2b; Short=AtHsfB2b; AltName: Full=AtHsf-11; AltName: Full=Heat shock factor protein 7; Short=HSF 7; AltName: Full=Heat shock transcription factor 7; Short=HSTF 7;	SubName: Full=Uncharacterized protein {ECO:0000313|EMBL:KNA04285.1};	Heat shock transcription factor	GO:0005634,nucleus; GO:0003700,DNA-binding transcription factor activity; GO:0043565,sequence-specific DNA binding; GO:0045892,negative regulation of transcription, DNA-templated; GO:0010200,response to chitin; GO:0006351,transcription, DNA-templated	HSF-type DNA-binding
gene-LOC110702504	0.18	0.72	0.4	0	0.02	0	8	32	16	0	1	0	54.22	5.761	9.01531e-05	0.00191814	up	NW_018744693.1	1518924	1521165	-	LOC110702504	--	K03327 multidrug resistance protein, MATE family | (RefSeq) protein DETOXIFICATION 49-like (A)	protein DETOXIFICATION 49-like [Chenopodium quinoa]	RecName: Full=Protein DETOXIFICATION 49 {ECO:0000303|PubMed:11739388}; Short=AtDTX49 {ECO:0000303|PubMed:11739388}; AltName: Full=Multidrug and toxic compound extrusion protein 49 {ECO:0000305}; Short=MATE protein 49 {ECO:0000305}; AltName: Full=Protein NOVEL ION CARRIER 1 {ECO:0000303|Ref.1}; Short=Protein NIC1 {ECO:0000303|Ref.1};	SubName: Full=protein DETOXIFICATION 49-like {ECO:0000313|RefSeq:XP_018811915.1};	Uncharacterized membrane protein, predicted efflux pump	GO:0016021,integral component of membrane; GO:0015297,antiporter activity; GO:0015238,drug transmembrane transporter activity; GO:0006855,drug transmembrane transport	MatE
gene-LOC110702518	4.32	6.14	6.07	2.13	1.63	4.97	343	478	425	166	125	381	2.12	1.084	0.00164699	0.021345	up	NW_018744693.1	1762689	1770074	+	LOC110702518	--	--	--	--	--	--	--	--
gene-LOC110702533	41.15	2.92	34.4	0.04	0.08	0.2	1066	74	785	1	2	5	286.402	8.162	2.72203e-17	5.49403e-15	up	NW_018744693.1	1957578	1958848	+	LOC110702533	--	K10249 elongation of very long chain fatty acids protein 4 [EC:2.3.1.199] | (RefSeq) elongation of very long chain fatty acids protein 5-like (A)	putative elongation of fatty acids protein DDB_G0272012 [Chenopodium quinoa]	RecName: Full=Elongation of fatty acids protein 3-like; Short=Protein ELO3-like; EC=2.3.1.-; AltName: Full=Protein HIGH EXPRESSION OF OSMOTICALLY RESPONSIVE GENES 3; AltName: Full=Very long-chain fatty acid condensing enzyme HOS3; Short=VLCFA condensing enzyme HOS3;	SubName: Full=Uncharacterized protein {ECO:0000313|EMBL:KMS96413.1};	Fatty acyl-CoA elongase/Polyunsaturated fatty acid specific elongation enzyme	GO:0030176,integral component of endoplasmic reticulum membrane; GO:0009922,fatty acid elongase activity; GO:0071215,cellular response to abscisic acid stimulus; GO:0030497,fatty acid elongation; GO:0034625,fatty acid elongation, monounsaturated fatty acid; GO:0034626,fatty acid elongation, polyunsaturated fatty acid; GO:0019367,fatty acid elongation, saturated fatty acid; GO:0030148,sphingolipid…	GNS1/SUR4 family
gene-LOC110702567	70	40.06	42.28	24.29	19.12	18.09	1167	654	621	397	307	291	2.645	1.403	0.000356961	0.00617396	up	NW_018744693.1	2444574	2445391	-	LOC110702567	--	--	zinc finger A20 and AN1 domain-containing stress-associated protein 7-like [Chenopodium quinoa]	RecName: Full=Zinc finger A20 and AN1 domain-containing stress-associated protein 1; Short=AtSAP1;	SubName: Full=Uncharacterized protein {ECO:0000313|EMBL:OAY56621.1};	Predicted Zn-finger protein	GO:0003677,DNA binding; GO:0008270,zinc ion binding	A20-like zinc finger
gene-LOC110702595	11.89	11.28	11.55	5.57	4.27	3.76	298	277	255	137	103	91	2.664	1.413	2.17539e-05	0.000557599	up	NW_018744693.1	2985274	2987051	-	LOC110702595	--	--	uncharacterized protein LOC110702595 [Chenopodium quinoa]	--	SubName: Full=Uncharacterized protein {ECO:0000313|EMBL:KNA16276.1};	--	--	Protein of unknown function (DUF1442)
gene-LOC110702596	9.16	12.14	10.46	2.04	4.58	4.37	513	666	516	112	247	236	3.014	1.592	1.94875e-05	0.000504056	up	NW_018744693.1	3005208	3009391	-	LOC110702596	--	K13416 brassinosteroid insensitive 1-associated receptor kinase 1 [EC:2.7.10.1 2.7.11.1] | (RefSeq) BRASSINOSTEROID INSENSITIVE 1-associated receptor kinase 1-like (A)	probable LRR receptor-like serine/threonine-protein kinase At1g34110 [Chenopodium quinoa]	RecName: Full=Protein NSP-INTERACTING KINASE 2; EC=2.7.11.1; AltName: Full=LRR receptor-like serine/threonine-protein kinase NIK2; Flags: Precursor;	SubName: Full=Uncharacterized protein {ECO:0000313|EMBL:KNA13646.1};	--	GO:0016021,integral component of membrane; GO:0005886,plasma membrane; GO:0005524,ATP binding; GO:0004675,transmembrane receptor protein serine/threonine kinase activity; GO:0007166,cell surface receptor signaling pathway; GO:0006952,defense response; GO:0006468,protein phosphorylation; GO:0016032,viral process	Protein tyrosine kinase
gene-LOC110702661	4.96	4.39	4.46	2.02	0.82	2.94	163	141	129	65	26	93	2.693	1.429	0.000452259	0.00748612	up	NW_018744693.1	5614028	5615638	+	LOC110702661	--	K11805 WD repeat-containing protein 68 | (RefSeq) WD repeat-containing protein LWD1 (A)	WD repeat-containing protein LWD1 [Chenopodium quinoa]	RecName: Full=WD repeat-containing protein LWD1; AltName: Full=Protein ANTHOCYANIN 11-A; Short=AtAN11-A; AltName: Full=Protein LIGHT-REGULATED WD1; AltName: Full=WD repeat-containing protein AN11-A;	SubName: Full=Uncharacterized protein {ECO:0000313|EMBL:KNA03141.1};	Conserved WD40 repeat-containing protein AN11	GO:0005634,nucleus; GO:0044212,transcription regulatory region DNA binding; GO:0009718,anthocyanin-containing compound biosynthetic process; GO:0043153,entrainment of circadian clock by photoperiod; GO:0048573,photoperiodism, flowering; GO:0048511,rhythmic process	WD domain, G-beta repeat
gene-LOC110702748	3.14	5.83	3.43	0.34	0.25	1.66	104	189	100	11	8	53	6.404	2.679	1.14909e-05	0.000317212	up	NW_018742393.1	951015	953551	+	LOC110702748	--	K03097 casein kinase II subunit alpha [EC:2.7.11.1] | (RefSeq) casein kinase II subunit alpha-like isoform X3 (A)	uncharacterized protein LOC110702748 [Chenopodium quinoa]	--	SubName: Full=Uncharacterized protein {ECO:0000313|EMBL:KNA16488.1};	--	--	Protein of unknown function (DUF642)
gene-LOC110702753	8.68	1.96	8.28	0.86	0.48	2.63	113	25	95	11	6	33	5.717	2.515	0.000783555	0.0117984	up	NW_018744702.1	225529	249278	+	LOC110702753	--	--	--	--	--	--	--	--
gene-LOC110702780	10.43	2.1	11.65	0.72	1.54	1.5	309	61	304	21	44	43	6.958	2.799	2.61517e-05	0.000653545	up	NW_018744702.1	1603471	1607515	-	LOC110702780	--	--	--	--	--	--	--	--
gene-LOC110702785	1.24	0.81	0.67	0.18	0	0.14	36	23	17	5	0	4	9.594	3.262	0.000247291	0.00454425	up	NW_018744702.1	1827815	1831212	-	LOC110702785	--	K23877 xyloglucan O-acetyltransferase | (RefSeq) protein ALTERED XYLOGLUCAN 4 (A)	protein trichome birefringence-like 38 [Chenopodium quinoa]	RecName: Full=Protein trichome birefringence-like 38;	SubName: Full=Uncharacterized protein {ECO:0000313|EMBL:ESR55606.1};	--	GO:0005794,Golgi apparatus; GO:0016021,integral component of membrane; GO:0016413,O-acetyltransferase activity; GO:0071554,cell wall organization or biogenesis	GDSL/SGNH-like Acyl-Esterase family found in Pmr5 and Cas1p
gene-LOC110702851	55.63	57.82	35.32	17.86	18.37	7.95	1509	1536	844	475	480	208	3.382	1.758	0.000221071	0.00414703	up	NW_018742393.1	1043397	1046079	+	LOC110702851	--	--	uncharacterized protein LOC110702851 [Chenopodium quinoa]	--	SubName: Full=uncharacterized protein LOC106762046 {ECO:0000313|RefSeq:XP_014501216.1};	--	GO:0016021,integral component of membrane	Uncharacterized protein family, UPF0114
gene-LOC110702934	0.77	0.96	0.63	0	0	0	39	48	28	0	0	0	222.716	7.799	2.94338e-09	1.77063e-07	up	NW_018744704.1	4274750	4279489	+	LOC110702934	--	--	--	--	--	--	--	--
gene-LOC110702935	0.24	0.52	0.32	0	0	0	25	52	29	0	0	0	202.683	7.663	1.03439e-08	5.61855e-07	up	NW_018744704.1	4263199	4274734	+	LOC110702935	--	--	--	--	--	--	--	--
gene-LOC110702947	7.48	9.05	5.7	2.65	1.18	2.42	337	399	226	117	51	105	3.853	1.946	4.05179e-08	1.95865e-06	up	NW_018744704.1	4990907	5007861	-	LOC110702947	--	K02563 UDP-N-acetylglucosamine--N-acetylmuramyl-(pentapeptide) pyrophosphoryl-undecaprenol N-acetylglucosamine transferase [EC:2.4.1.227] | (RefSeq) uncharacterized protein LOC110702947 (A)	uncharacterized protein LOC110702947 [Chenopodium quinoa]	--	SubName: Full=Uncharacterized protein {ECO:0000313|EMBL:KNA19339.1};	--	GO:0016021,integral component of membrane; GO:0050511,undecaprenyldiphospho-muramoylpentapeptide beta-N-acetylglucosaminyltransferase activity; GO:0005975,carbohydrate metabolic process; GO:0030259,lipid glycosylation	Glycosyltransferase family 28 C-terminal domain
gene-LOC110702953	7.91	8.34	7.15	1.02	2.48	1.08	182	188	145	23	55	24	5.133	2.36	3.19982e-06	0.000102239	up	NW_018744704.1	5315767	5317811	-	LOC110702953	--	--	uncharacterized protein LOC110702953 [Chenopodium quinoa]	--	SubName: Full=Uncharacterized protein {ECO:0000313|EMBL:KNA19093.1};	--	GO:0016021,integral component of membrane	Protein of unknown function, DUF599
gene-LOC110702955	4.11	3.44	4.41	0.29	0	0.59	72	59	68	5	0	10	15.48	3.952	5.68244e-09	3.26418e-07	up	NW_018744704.1	5430622	5434171	-	LOC110702955	--	K03133 transcription initiation factor TFIID subunit 9B | (RefSeq) transcription initiation factor TFIID subunit 9-like (A)	transcription initiation factor TFIID subunit 9-like [Chenopodium quinoa]	RecName: Full=Transcription initiation factor TFIID subunit 9; AltName: Full=TATA binding protein associated factor 21kDa subunit; AltName: Full=TBP-associated factor 9; Short=AtTAF9;	SubName: Full=Uncharacterized protein {ECO:0000313|EMBL:KNA06924.1};	Transcription initiation factor TFIID, subunit TAF9 (also component of histone acetyltransferase SAGA)	GO:0000124,SAGA complex; GO:0005669,transcription factor TFIID complex; GO:0046982,protein heterodimerization activity; GO:0008134,transcription factor binding; GO:0044212,transcription regulatory region DNA binding; GO:0043966,histone H3 acetylation; GO:0045944,positive regulation of transcription by RNA polymerase II; GO:0051123,RNA polymerase II preinitiation complex assembly; GO:0006366,trans…	Transcription initiation factor IID, 31kD subunit
gene-LOC110702974	24.78	24.85	23.48	6.61	14.46	4.62	612	601	511	160	344	110	2.792	1.481	0.00490778	0.0493934	up	NW_018744704.1	6543417	6545306	-	LOC110702974	--	--	uncharacterized protein LOC110702974 [Chenopodium quinoa]	--	SubName: Full=Uncharacterized protein {ECO:0000313|EMBL:KNA20825.1};	--	--	PAP_fibrillin
gene-LOC110703036	4.14	5.21	3.85	0.04	0	0	94	116	77	1	0	0	285.838	8.159	5.07886e-11	4.11388e-09	up	NW_018744709.1	62253	64509	+	LOC110703036	--	--	--	--	--	--	--	--
gene-LOC110703103	1.82	0.93	0.93	0	0	0	20	10	9	0	0	0	77.547	6.277	5.61712e-05	0.0012645	up	NW_018744718.1	1942692	1943231	+	LOC110703103	--	K23280 rhamnogalacturonan I rhamnosyltransferase [EC:2.4.1.351] | (RefSeq) uncharacterized protein LOC101257103 isoform X1 (A)	uncharacterized protein LOC110703103 [Chenopodium quinoa]	--	SubName: Full=uncharacterized protein LOC104225154 {ECO:0000313|RefSeq:XP_009775227.1};	FOG: Transposon-encoded proteins with TYA, reverse transcriptase, integrase domains in various combinations	--	gag-polypeptide of LTR copia-type
gene-LOC110703104	1.99	1.94	1.02	0	0	0	42	40	19	0	0	0	196.486	7.618	2.3096e-08	1.17382e-06	up	NW_018744718.1	1946091	1947187	+	LOC110703104	--	K13420 LRR receptor-like serine/threonine-protein kinase FLS2 [EC:2.7.11.1] | (RefSeq) LRR receptor-like serine/threonine-protein kinase FLS2 (A)	uncharacterized protein LOC110703104 [Chenopodium quinoa]	RecName: Full=Retrovirus-related Pol polyprotein from transposon RE1; AltName: Full=Retro element 1 {ECO:0000303|PubMed:10689195}; Short=AtRE1 {ECO:0000303|PubMed:10689195}; Includes: RecName: Full=Protease RE1; EC=3.4.23.-; Includes: RecName: Full=Reverse transcriptase RE1; EC=2.7.7.49; Includes: RecName: Full=Endonuclease RE1;	SubName: Full=uncharacterized mitochondrial protein AtMg00810-like {ECO:0000313|RefSeq:XP_016437586.1};	FOG: Transposon-encoded proteins with TYA, reverse transcriptase, integrase domains in various combinations	GO:0004190,aspartic-type endopeptidase activity; GO:0004519,endonuclease activity; GO:0046872,metal ion binding; GO:0003676,nucleic acid binding; GO:0003964,RNA-directed DNA polymerase activity; GO:0015074,DNA integration; GO:0006310,DNA recombination	Reverse transcriptase (RNA-dependent DNA polymerase)
gene-LOC110703106	123.43	65.49	52.96	17.27	19.25	9.5	2762	1435	1044	379	415	205	5.451	2.446	2.22303e-06	7.38397e-05	up	NW_018744718.1	2077811	2078908	+	LOC110703106	--	--	F-box/kelch-repeat protein At1g80440-like [Chenopodium quinoa]	RecName: Full=F-box/kelch-repeat protein At1g80440;	SubName: Full=Uncharacterized protein {ECO:0000313|EMBL:KNA14194.1};	FOG: Kelch repeat	GO:0005829,cytosol; GO:0019005,SCF ubiquitin ligase complex; GO:0031625,ubiquitin protein ligase binding; GO:0080037,negative regulation of cytokinin-activated signaling pathway; GO:0043161,proteasome-mediated ubiquitin-dependent protein catabolic process; GO:0042787,NA; GO:2000762,regulation of phenylpropanoid metabolic process; GO:0030162,regulation of proteolysis	Kelch motif
gene-LOC110703148	0.35	0.19	0.13	0	0	0	15	8	5	0	0	0	55.466	5.794	0.00057544	0.00914957	up	NW_018744718.1	387378	390112	+	LOC110703148	--	K10268 F-box and leucine-rich repeat protein 2/20 | (RefSeq) F-box/LRR-repeat protein 2-like (A)	F-box/LRR-repeat protein 2-like [Chenopodium quinoa]	RecName: Full=EIN3-binding F-box protein 1; AltName: Full=F-box/LRR-repeat protein 6;	SubName: Full=Uncharacterized protein {ECO:0000313|EMBL:KNA05739.1};	Leucine rich repeat proteins, some proteins contain F-box	GO:0005634,nucleus; GO:0009873,ethylene-activated signaling pathway; GO:0010105,negative regulation of ethylene-activated signaling pathway; GO:0016567,protein ubiquitination; GO:0009723,response to ethylene; GO:0006511,ubiquitin-dependent protein catabolic process	Leucine Rich repeats (2 copies)
gene-LOC110703179	0.86	0.78	0.43	0.05	0	0.1	18	16	8	1	0	2	15.798	3.982	0.00081794	0.0121968	up	NW_018742393.1	1454308	1455338	-	LOC110703179	--	K09060 plant G-box-binding factor | (RefSeq) G-box-binding factor 1 (A)	basic leucine zipper 43-like [Chenopodium quinoa]	RecName: Full=Basic leucine zipper 43 {ECO:0000303|PubMed:11906833}; Short=AtbZIP43 {ECO:0000303|PubMed:11906833}; Short=bZIP protein 43 {ECO:0000303|PubMed:11906833};	SubName: Full=Uncharacterized protein {ECO:0000313|EMBL:KNA19416.1};	--	GO:0005634,nucleus; GO:0003677,DNA binding; GO:0003700,DNA-binding transcription factor activity; GO:0006351,transcription, DNA-templated	bZIP transcription factor
gene-LOC110703203	0.05	0.36	0.26	0	0	0	2	14	9	0	0	0	47.153	5.559	0.00228722	0.0276172	up	NW_018742393.1	1477236	1479411	+	LOC110703203	--	K11866 STAM-binding protein [EC:3.4.19.12] | (RefSeq) probable ubiquitin thioesterase DG1039 (A)	zinc finger BED domain-containing protein DAYSLEEPER-like [Chenopodium quinoa]	RecName: Full=Zinc finger BED domain-containing protein DAYSLEEPER; AltName: Full=Transposase-like protein DAYSLEEPER;	SubName: Full=Uncharacterized protein {ECO:0000313|EMBL:KNA03332.1};	Tam3-transposase (Ac family)	GO:0005829,cytosol; GO:0005634,nucleus; GO:0003700,DNA-binding transcription factor activity; GO:0046872,metal ion binding; GO:0046983,protein dimerization activity; GO:0000977,RNA polymerase II regulatory region sequence-specific DNA binding; GO:0009791,post-embryonic development; GO:0006357,regulation of transcription by RNA polymerase II; GO:0006351,transcription, DNA-templated	hAT family C-terminal dimerisation region
gene-LOC110703212	24.95	44.79	39.64	16.09	8.84	29.5	1515	2663	2120	958	517	1728	2.233	1.159	0.000977794	0.0140967	up	NW_018744718.1	558866	565892	-	LOC110703212	--	--	--	--	--	--	--	--
gene-LOC110703213	2.06	3.28	3.24	1.45	1.28	1.8	122	190	169	84	73	103	2.002	1.001	0.000241367	0.00446203	up	NW_018742393.1	1490720	1505972	-	LOC110703213	--	--	WPP domain-interacting tail-anchored protein 1-like isoform X1 [Chenopodium quinoa]	RecName: Full=WPP domain-interacting tail-anchored protein 1;	SubName: Full=Uncharacterized protein {ECO:0000313|EMBL:KNA17601.1};	--	GO:0016021,integral component of membrane; GO:0005635,nuclear envelope; GO:0031965,nuclear membrane	Neurotensin/neuromedin N precursor
gene-LOC110703237	57.96	43.54	43.56	19.68	24.93	15.28	1388	1021	919	462	575	353	2.495	1.319	0.000760424	0.0115236	up	NW_018744718.1	828371	831158	-	LOC110703237	--	--	uncharacterized protein LOC110703237 [Chenopodium quinoa]	--	SubName: Full=Uncharacterized protein {ECO:0000313|EMBL:KNA20899.1};	--	--	--
gene-LOC110703242	19.57	11.34	17.25	3.92	4.58	2.8	550	312	427	108	124	76	4.419	2.144	8.02623e-07	3.00361e-05	up	NW_018744718.1	867212	870266	+	LOC110703242	--	K03239 translation initiation factor eIF-2B subunit alpha | (RefSeq) methylthioribose-1-phosphate isomerase (A)	protein LURP-one-related 12-like [Chenopodium quinoa]	RecName: Full=Protein LURP-one-related 12;	SubName: Full=Uncharacterized protein {ECO:0000313|EMBL:KNA10612.1};	--	--	LURP-one-related
gene-LOC110703260	1.1	0.18	0.63	0	0	0	32	5	16	0	0	0	108.174	6.757	3.13567e-05	0.000761904	up	NW_018744718.1	1126943	1128861	-	LOC110703260	--	K13390 (R,S)-reticuline 7-O-methyltransferase [EC:2.1.1.291] | (RefSeq) (R,S)-reticuline 7-O-methyltransferase (A)	desmethylxanthohumol 6'-O-methyltransferase-like [Chenopodium quinoa]	RecName: Full=(R,S)-reticuline 7-O-methyltransferase {ECO:0000303|PubMed:14675446}; Short=7OMT {ECO:0000303|PubMed:14675446}; EC=2.1.1.291 {ECO:0000269|PubMed:14675446};	SubName: Full=Uncharacterized protein {ECO:0000313|EMBL:KNA13417.1};	Hydroxyindole-O-methyltransferase and related SAM-dependent methyltransferases	GO:0102918,(R)-reticuline 7-O-methyltransferase activity; GO:0102917,(S)-reticuline 7-O-methyltransferase activity; GO:0042802,identical protein binding; GO:0008171,O-methyltransferase activity; GO:0046983,protein dimerization activity; GO:0009821,alkaloid biosynthetic process	O-methyltransferase domain
gene-LOC110703280	1.75	2.32	3.49	0.81	0.56	1.98	117	152	206	53	36	128	2.541	1.345	0.00258085	0.0303684	up	NW_018744718.1	1336655	1343505	-	LOC110703280	--	K14558 periodic tryptophan protein 2 | (RefSeq) LOW QUALITY PROTEIN: periodic tryptophan protein 2-like (A)	LOW QUALITY PROTEIN: periodic tryptophan protein 2-like [Chenopodium quinoa]	RecName: Full=Periodic tryptophan protein 2 {ECO:0000303|PubMed:19929880}; Short=AtPWP2 {ECO:0000303|PubMed:19929880};	SubName: Full=Uncharacterized protein {ECO:0000313|EMBL:KNA23292.1};	WD40-repeat-containing subunit of the 18S rRNA processing complex	GO:0080008,Cul4-RING E3 ubiquitin ligase complex; GO:0005730,nucleolus; GO:0005634,nucleus; GO:0034388,Pwp2p-containing subcomplex of 90S preribosome; GO:0032040,small-subunit processome; GO:0030515,snoRNA binding; GO:0009553,embryo sac development; GO:0000462,maturation of SSU-rRNA from tricistronic rRNA transcript (SSU-rRNA, 5.8S rRNA, LSU-rRNA); GO:0010119,regulation of stomatal movement; GO:0…	WD domain, G-beta repeat
gene-LOC110703288	3.32	2.08	3.18	0.96	0.64	2.19	274	168	231	78	51	174	2.608	1.383	0.00136042	0.0184466	up	NW_018742393.1	1575675	1586406	-	LOC110703288	--	K10908 DNA-directed RNA polymerase, mitochondrial [EC:2.7.7.6] | (RefSeq) DNA-directed RNA polymerase 2, chloroplastic/mitochondrial-like (A)	DNA-directed RNA polymerase 2, chloroplastic/mitochondrial-like [Chenopodium quinoa]	RecName: Full=DNA-directed RNA polymerase 2, chloroplastic/mitochondrial; EC=2.7.7.6; AltName: Full=NsRpoT-B; AltName: Full=T7 bacteriophage-type single subunit RNA polymerase 2; Flags: Precursor;	RecName: Full=DNA-directed RNA polymerase {ECO:0000256|RuleBase:RU003805}; EC=2.7.7.6 {ECO:0000256|RuleBase:RU003805};	Mitochondrial/chloroplast DNA-directed RNA polymerase RPO41, provides primers for DNA replication-initiation	GO:0009507,chloroplast; GO:0005739,mitochondrion; GO:0009536,plastid; GO:0003677,DNA binding; GO:0003899,DNA-directed 5'-3' RNA polymerase activity; GO:0006351,transcription, DNA-templated	DNA-dependent RNA polymerase
gene-LOC110703306	0.86	0.84	1.68	0.16	0.06	0.28	48	46	83	9	3	15	7.555	2.917	1.4315e-06	5.01628e-05	up	NW_018744718.1	1687798	1691696	-	LOC110703306	--	--	uncharacterized protein LOC110703306 [Chenopodium quinoa]	--	SubName: Full=Uncharacterized protein {ECO:0000313|EMBL:KNA09889.1};	--	GO:0005524,ATP binding	--
gene-LOC110703318	2.04	2.78	0.77	0	0	0	24	32	8	0	0	0	122.492	6.937	3.22204e-06	0.000102683	up	NW_018744718.1	1945449	1946025	+	LOC110703318	--	K12447 UDP-sugar pyrophosphorylase [EC:2.7.7.64] | (RefSeq) uncharacterized protein LOC104808371 (A)	uncharacterized protein LOC110703318 [Chenopodium quinoa]	RecName: Full=Retrovirus-related Pol polyprotein from transposon RE1; AltName: Full=Retro element 1 {ECO:0000303|PubMed:10689195}; Short=AtRE1 {ECO:0000303|PubMed:10689195}; Includes: RecName: Full=Protease RE1; EC=3.4.23.-; Includes: RecName: Full=Reverse transcriptase RE1; EC=2.7.7.49; Includes: RecName: Full=Endonuclease RE1;	SubName: Full=Retrovirus-related Pol polyprotein from transposon TNT 1-94 {ECO:0000313|EMBL:KYP54964.1}; Flags: Fragment;	FOG: Transposon-encoded proteins with TYA, reverse transcriptase, integrase domains in various combinations	GO:0004190,aspartic-type endopeptidase activity; GO:0004519,endonuclease activity; GO:0046872,metal ion binding; GO:0003676,nucleic acid binding; GO:0003964,RNA-directed DNA polymerase activity; GO:0015074,DNA integration; GO:0006310,DNA recombination	Reverse transcriptase (RNA-dependent DNA polymerase)
gene-LOC110703332	49.04	20.11	20.61	15.43	6.07	10.67	2020	811	748	623	241	424	3.109	1.636	0.00140753	0.0189601	up	NW_018744718.1	2155025	2161055	+	LOC110703332	--	K12742 isoprene synthase [EC:4.2.3.27] | (RefSeq) tricyclene synthase TPS4, chloroplastic-like (A)	tricyclene synthase TPS4, chloroplastic-like [Chenopodium quinoa]	RecName: Full=Tricyclene synthase EBOS, chloroplastic; EC=4.2.3.105; AltName: Full=(E)-beta-ocimene synthase; Short=LjEBOS; Short=LjEbetaOS; EC=4.2.3.106; AltName: Full=Terpenoid synthase 2; Short=LjTPS2; Flags: Precursor;	SubName: Full=Uncharacterized protein {ECO:0000313|EMBL:KMS95949.1};	--	GO:0009570,chloroplast stroma; GO:0000287,magnesium ion binding; GO:0010333,terpene synthase activity; GO:0102701,tricyclene synthase activity; GO:0006952,defense response; GO:0080027,response to herbivore; GO:0009611,response to wounding; GO:0016114,terpenoid biosynthetic process	Terpene synthase family, metal binding domain
gene-LOC110703470	7.39	9.1	8.41	2.8	1.98	6.31	476	574	477	177	123	392	2.531	1.34	7.76004e-05	0.00168108	up	NW_018744718.1	3787168	3792451	-	LOC110703470	--	K08150 MFS transporter, SP family, solute carrier family 2 (myo-inositol transporter), member 13 | (Kazusa) Lj4g3v0119930.1; - (A)	monosaccharide-sensing protein 2-like [Chenopodium quinoa]	RecName: Full=Monosaccharide-sensing protein 2; AltName: Full=Sugar transporter MSSP2;	SubName: Full=Uncharacterized protein {ECO:0000313|EMBL:KNA13582.1};	Predicted transporter (major facilitator superfamily)	GO:0005794,Golgi apparatus; GO:0016021,integral component of membrane; GO:0005774,vacuolar membrane; GO:0005773,vacuole; GO:0005355,glucose transmembrane transporter activity; GO:0005351,carbohydrate:proton symporter activity; GO:0046323,glucose import; GO:0035428,NA	Sugar (and other) transporter
gene-LOC110703512	12.97	2.44	14.39	3.34	1.16	1.36	396	73	387	100	34	40	5.485	2.456	0.000495037	0.00807984	up	NW_018742393.1	1893684	1900893	-	LOC110703512	--	K09264 MADS-box transcription factor, plant | (RefSeq) truncated transcription factor CAULIFLOWER A-like isoform X1 (A)	truncated transcription factor CAULIFLOWER A-like isoform X1 [Chenopodium quinoa]	RecName: Full=Agamous-like MADS-box protein AGL8 homolog; AltName: Full=POTM1-1;	SubName: Full=Uncharacterized protein {ECO:0000313|EMBL:KNA07693.1};	MADS box transcription factor	GO:0005634,nucleus; GO:0003700,DNA-binding transcription factor activity; GO:0046983,protein dimerization activity; GO:0000977,RNA polymerase II regulatory region sequence-specific DNA binding; GO:0045944,positive regulation of transcription by RNA polymerase II; GO:0006351,transcription, DNA-templated	K-box region
gene-LOC110703625	16.11	14.3	22.43	8.58	8.07	7.46	734	638	900	383	354	328	2.286	1.193	0.000146798	0.00291984	up	NW_018744745.1	1010860	1024452	-	LOC110703625	--	K03686 molecular chaperone DnaJ | (RefSeq) chaperone protein dnaJ A7A, chloroplastic-like isoform X1 (A)	chaperone protein dnaJ A7A, chloroplastic-like isoform X1 [Chenopodium quinoa]	RecName: Full=Chaperone protein dnaJ A6, chloroplastic {ECO:0000305}; Short=atDjA6 {ECO:0000303|PubMed:23894646}; AltName: Full=Chaperone protein dnaJ A26 {ECO:0000303|PubMed:11599562}; Short=AtDjA26 {ECO:0000303|PubMed:11599562}; Flags: Precursor;	SubName: Full=Uncharacterized protein {ECO:0000313|EMBL:KNA13896.1};	Molecular chaperone (DnaJ superfamily)	GO:0009507,chloroplast; GO:0009941,chloroplast envelope; GO:0009535,chloroplast thylakoid membrane; GO:0005524,ATP binding; GO:0031072,heat shock protein binding; GO:0046872,metal ion binding; GO:0051082,unfolded protein binding; GO:0006457,protein folding; GO:0009408,response to heat	DnaJ C terminal domain
gene-LOC110703639	1.54	1.49	2.04	0.74	0.54	0.49	91	86	106	43	31	28	2.971	1.571	9.57584e-05	0.0020229	up	NW_018744745.1	1531952	1539420	-	LOC110703639	--	K23398 activating signal cointegrator 1 | (RefSeq) uncharacterized protein LOC112293566 (A)	uncharacterized protein LOC110703639 isoform X1 [Chenopodium quinoa]	--	SubName: Full=Uncharacterized protein {ECO:0000313|EMBL:KNA06077.1};	DNA alkylation damage repair protein	GO:0016491,oxidoreductase activity; GO:0006281,DNA repair	2OG-Fe(II) oxygenase superfamily
gene-LOC110703658	3.12	5.1	5.11	0.18	0.15	0.24	108	173	156	6	5	8	24.994	4.644	3.35151e-23	1.34556e-20	up	NW_018744745.1	1962248	1969512	-	LOC110703658	--	K14168 cytoplasmic tRNA 2-thiolation protein 1 [EC:2.7.7.-] | (RefSeq) cytoplasmic tRNA 2-thiolation protein 1 (A)	cytoplasmic tRNA 2-thiolation protein 1 [Chenopodium quinoa]	RecName: Full=Cytoplasmic tRNA 2-thiolation protein 1 {ECO:0000255|HAMAP-Rule:MF_03053}; EC=2.7.7.- {ECO:0000255|HAMAP-Rule:MF_03053}; AltName: Full=Cytoplasmic tRNA adenylyltransferase 1 {ECO:0000255|HAMAP-Rule:MF_03053};	RecName: Full=Cytoplasmic tRNA 2-thiolation protein 1 {ECO:0000256|HAMAP-Rule:MF_03053}; EC=2.7.7.- {ECO:0000256|HAMAP-Rule:MF_03053}; AltName: Full=Cytoplasmic tRNA adenylyltransferase 1 {ECO:0000256|HAMAP-Rule:MF_03053};	Uncharacterized conserved protein with similarity to predicted ATPase of the PP-loop superfamily	GO:0005737,cytoplasm; GO:0016740,transferase activity; GO:0000049,tRNA binding; GO:0034227,tRNA thio-modification; GO:0002098,tRNA wobble uridine modification	Zinc-ribbon
gene-LOC110703660	5.66	12.1	10.41	0	0	0	74	155	120	0	0	0	671.291	9.391	8.49971e-14	1.04301e-11	up	NW_018744745.1	2145058	2147444	+	LOC110703660	--	--	--	--	--	--	--	--
gene-LOC110703661	0.6	0.03	0.79	0	0	0	19	1	22	0	0	0	86.408	6.433	0.000506398	0.00823616	up	NW_018744745.1	2181684	2187044	+	LOC110703661	--	--	--	--	--	--	--	--
gene-LOC110703716	4.24	5.11	5.91	0.14	0.03	0	127	150	156	4	1	0	93.502	6.547	1.17052e-18	2.91264e-16	up	NW_018744756.1	20587	27386	-	LOC110703716	--	--	uncharacterized protein LOC110703716 isoform X1 [Chenopodium quinoa]	--	SubName: Full=Uncharacterized protein {ECO:0000313|EMBL:ERP46387.1}; Flags: Fragment;	RNA Methylase, SpoU family	GO:0003723,RNA binding; GO:0008173,RNA methyltransferase activity; GO:0030488,tRNA methylation	SpoU rRNA Methylase family
gene-LOC110703917	2.48	2.33	1.78	0.98	1.2	1.34	192	176	121	74	89	100	2.003	1.002	0.0021796	0.026552	up	NW_018744790.1	856393	865112	-	LOC110703917	--	--	uncharacterized protein LOC110703917 [Chenopodium quinoa]	--	SubName: Full=Uncharacterized protein {ECO:0000313|EMBL:KNA06586.1}; Flags: Fragment;	Uncharacterized conserved protein	--	Chromosome segregation during meiosis
[truncated: 2,448 more rows]
