# Supplementary material for: Elucidating the Differentiation Synthesis Mechanisms of Differently Colored Resistance Quinoa Seedings Using Metabolite Profiling and Transcriptome Analysis
Source: Metabolites. 2023 Oct 10;13(10):1065. doi: 10.3390/metabo13101065 (PMC10609267; doi:10.3390/metabo13101065)
Supplement: Supplementary file 1 [file metabolites-13-01065-s001.zip › Table S18.xlsx]

## Sheet: Sheet1
Table S18 Number of differential genes in R-WvsR-Y
ID	R-W1_fpkm	R-W2_fpkm	R-W3_fpkm	R-Y1_fpkm	R-Y2_fpkm	R-Y3_fpkm	R-W1_count	R-W2_count	R-W3_count	R-Y1_count	R-Y2_count	R-Y3_count	FoldChange	log2FoldChange	pvalue	padj	regulated	chr	start	end	strand	gene_name	gene_description	KEGG	NR	Swissprot	Tremble	KOG	GO	Pfam
gene-CDC77_pgt004	0.61	1.17	0	6.59	4.78	8.06	1	2	0	11	9	13	14.448	3.853	0.00119135	0.00874726	up	NC_034949.1	7750	7837	-	trnS-GCU	--	--	--	--	--	--	--	--
gene-LOC110681608	0.72	0.79	0.71	1.32	0.95	1.21	33	38	34	62	50	55	2.033	1.024	0.00237158	0.0148928	up	NW_018743555.1	882879	889286	-	LOC110681608	--	K14780 ATP-dependent RNA helicase DHX37/DHR1 [EC:3.6.4.13] | (RefSeq) ATP-dependent RNA helicase DEAH13-like isoform X1 (A)	uncharacterized protein LOC110681608, partial [Chenopodium quinoa]	--	SubName: Full=Uncharacterized protein {ECO:0000313|EMBL:KNA12303.1};	Galactosyltransferases	GO:0016021,integral component of membrane	Protein of unknown function, DUF604
gene-LOC110681673	58.61	47.69	51.46	94.27	84.79	99.76	2494	2121	2278	4089	4143	4178	2.291	1.196	4.07684e-09	1.66123e-07	up	NW_018742244.1	2770991	2775852	+	LOC110681673	--	K01626 3-deoxy-7-phosphoheptulonate synthase [EC:2.5.1.54] | (RefSeq) phospho-2-dehydro-3-deoxyheptonate aldolase 2, chloroplastic-like (A)	phospho-2-dehydro-3-deoxyheptonate aldolase 2, chloroplastic-like [Chenopodium quinoa]	RecName: Full=Phospho-2-dehydro-3-deoxyheptonate aldolase 2, chloroplastic; EC=2.5.1.54; AltName: Full=3-deoxy-D-arabino-heptulosonate 7-phosphate synthase 2; AltName: Full=DAHP synthase 2; AltName: Full=Phospho-2-keto-3-deoxyheptonate aldolase 2; Flags: Precursor;	RecName: Full=Phospho-2-dehydro-3-deoxyheptonate aldolase {ECO:0000256|RuleBase:RU363071}; EC=2.5.1.54 {ECO:0000256|RuleBase:RU363071};	--	GO:0009507,chloroplast; GO:0009534,chloroplast thylakoid; GO:0003849,3-deoxy-7-phosphoheptulonate synthase activity; GO:0009073,aromatic amino acid family biosynthetic process; GO:0009423,chorismate biosynthetic process	Class-II DAHP synthetase family
gene-LOC110681692	0.09	0.13	0.04	13.12	10.93	7.63	2	3	1	294	276	165	154.887	7.275	9.14342e-28	4.71926e-25	up	NW_018742244.1	2783509	2785966	-	LOC110681692	--	K17744 L-galactose dehydrogenase [EC:1.1.1.316] | (RefSeq) L-galactose dehydrogenase-like (A)	L-galactose dehydrogenase-like [Chenopodium quinoa]	RecName: Full=L-galactose dehydrogenase; Short=At-GalDH; Short=L-GalDH; EC=1.1.1.316;	SubName: Full=Uncharacterized protein {ECO:0000313|EMBL:KNA10025.1};	Predicted oxidoreductase	GO:0005829,cytosol; GO:0010349,L-galactose dehydrogenase activity; GO:0006012,galactose metabolic process; GO:0019853,L-ascorbic acid biosynthetic process	Aldo/keto reductase family
gene-LOC110681721	0	0	0	0.27	0.14	0.12	0	0	0	7	4	3	31.685	4.986	0.00937561	0.042438	up	NW_018743574.1	7780891	7783560	-	LOC110681721	--	--	--	--	--	--	--	--
gene-LOC110681724	0.15	0.15	0.62	9.04	10.05	14.58	5	5	21	302	378	470	47.302	5.564	7.07795e-23	2.27934e-20	up	NW_018743574.1	8205098	8208856	-	LOC110681724	--	K13422 transcription factor MYC2 | (RefSeq) transcription factor MYC3 (A)	transcription factor bHLH18-like [Chenopodium quinoa]	RecName: Full=Transcription factor NAI1; AltName: Full=Basic helix-loop-helix protein 20; Short=AtbHLH20; Short=bHLH 20; AltName: Full=Transcription factor EN 27; AltName: Full=bHLH transcription factor bHLH020;	SubName: Full=Uncharacterized protein {ECO:0000313|EMBL:KMS95692.1};	--	GO:0005634,nucleus; GO:0003677,DNA binding; GO:0003700,DNA-binding transcription factor activity; GO:0046983,protein dimerization activity; GO:0007029,endoplasmic reticulum organization; GO:0006355,regulation of transcription, DNA-templated; GO:0006351,transcription, DNA-templated	Helix-loop-helix DNA-binding domain
gene-LOC110681828	0.61	0.58	0.72	0.93	1.44	1.49	34	34	42	53	93	82	2.664	1.414	0.000589304	0.00497877	up	NW_018743574.1	595154	601012	+	LOC110681828	--	K17609 nucleoredoxin [EC:1.8.1.8] | (RefSeq) hypothetical protein (A)	U-box domain-containing protein 33-like isoform X1 [Chenopodium quinoa]	RecName: Full=U-box domain-containing protein 33; AltName: Full=Plant U-box protein 33; Includes: RecName: Full=E3 ubiquitin ligase; EC=2.3.2.27; AltName: Full=RING-type E3 ubiquitin transferase {ECO:0000305}; Includes: RecName: Full=Serine/threonine-protein kinase; EC=2.7.11.-;	SubName: Full=Uncharacterized protein {ECO:0000313|EMBL:KNA19459.1};	--	GO:0005524,ATP binding; GO:0004674,protein serine/threonine kinase activity; GO:0004842,ubiquitin-protein transferase activity	Protein tyrosine kinase
gene-LOC110681832	0	0	0	2.21	2.38	2.29	0	0	0	84	102	84	625.434	9.289	6.04787e-14	6.01245e-12	up	NW_018743574.1	647052	655910	+	LOC110681832	--	K03301 ATP:ADP antiporter, AAA family | (RefSeq) uncharacterized protein LOC110681832 (A)	uncharacterized protein LOC110681832 [Chenopodium quinoa]	--	RecName: Full=ADP,ATP carrier protein {ECO:0000256|RuleBase:RU363121};	--	GO:0031969,chloroplast membrane; GO:0016021,integral component of membrane; GO:0005524,ATP binding; GO:0005471,ATP:ADP antiporter activity	TLC ATP/ADP transporter
gene-LOC110681835	0.61	0.91	1.02	1.15	1.26	1.49	27	42	47	52	64	65	2.012	1.009	0.010043	0.0446514	up	NW_018743574.1	679900	682281	-	LOC110681835	--	K06901 putative MFS transporter, AGZA family, xanthine/uracil permease | (RefSeq) adenine/guanine permease AZG1-like (A)	adenine/guanine permease AZG1-like [Chenopodium quinoa]	RecName: Full=Adenine/guanine permease AZG1; AltName: Full=AzgA-homolog protein; AltName: Full=Protein AZAGUANINE RESISTANT 1; Short=AtAzg1;	SubName: Full=Uncharacterized protein {ECO:0000313|EMBL:KNA22970.1};	--	GO:0016021,integral component of membrane; GO:0005345,purine nucleobase transmembrane transporter activity; GO:0005215,transporter activity; GO:0015853,adenine transport; GO:0015854,guanine transport; GO:0006863,purine nucleobase transport	Permease family
gene-LOC110681844	1.23	1.26	1.39	1.38	2.18	4.99	28	30	33	32	57	112	2.933	1.553	0.00797702	0.0375886	up	NW_018743574.1	802896	804688	+	LOC110681844	--	K00430 peroxidase [EC:1.11.1.7] | (RefSeq) peroxidase 55-like (A)	peroxidase 55-like [Chenopodium quinoa]	RecName: Full=Peroxidase 55; Short=Atperox P55; EC=1.11.1.7; AltName: Full=ATP20a; Flags: Precursor;	RecName: Full=Peroxidase {ECO:0000256|RuleBase:RU362060, ECO:0000256|SAAS:SAAS00709852}; EC=1.11.1.7 {ECO:0000256|RuleBase:RU362060, ECO:0000256|SAAS:SAAS00709852};	--	GO:0005576,extracellular region; GO:0020037,heme binding; GO:0046872,metal ion binding; GO:0004601,peroxidase activity; GO:0042744,hydrogen peroxide catabolic process; GO:0006979,response to oxidative stress	Peroxidase
gene-LOC110681846	10.01	9.4	9.21	13.09	16.08	19.12	483	474	462	644	891	908	2.22	1.151	1.08917e-05	0.000184605	up	NW_018743574.1	807858	812023	-	LOC110681846	--	--	protein NUCLEAR FUSION DEFECTIVE 4-like isoform X1 [Chenopodium quinoa]	RecName: Full=Protein NUCLEAR FUSION DEFECTIVE 4 {ECO:0000303|PubMed:16698901};	SubName: Full=Uncharacterized protein {ECO:0000313|EMBL:KNA03865.1};	--	GO:0016021,integral component of membrane; GO:0000741,karyogamy; GO:0010197,polar nucleus fusion; GO:0009651,response to salt stress	Nodulin-like
gene-LOC110681850	3.45	5.48	8.75	15.77	9.84	13.15	44	73	116	205	144	165	2.794	1.483	0.000290581	0.00283273	up	NW_018743574.1	825050	825734	+	LOC110681850	--	K11094 U2 small nuclear ribonucleoprotein B'' | (RefSeq) U2 small nuclear ribonucleoprotein B''-like isoform X1 (A)	uncharacterized protein LOC110681850 [Chenopodium quinoa]	--	SubName: Full=Uncharacterized protein {ECO:0000313|EMBL:KNA06760.1};	--	GO:0016021,integral component of membrane	Protein of unknown function (DUF3339)
gene-LOC110681865	0.35	0.06	0.16	0.45	0.65	0.42	27	5	13	36	58	32	3.444	1.784	0.00999299	0.0444844	up	NW_018743574.1	992185	998460	+	LOC110681865	--	K13457 disease resistance protein RPM1 | (RefSeq) disease resistance protein RPM1 (A)	disease resistance protein RPP8-like [Chenopodium quinoa]	RecName: Full=Probable disease resistance protein At1g58390;	SubName: Full=Uncharacterized protein {ECO:0000313|EMBL:KNA17447.1};	Apoptotic ATPase	GO:0005886,plasma membrane; GO:0043531,ADP binding; GO:0005524,ATP binding; GO:0006952,defense response; GO:0007165,signal transduction	NB-ARC domain
gene-LOC110681889	0.1	0.14	0.04	1.16	0.4	0.48	5	7	2	57	22	23	9.212	3.204	9.57538e-06	0.000165648	up	NW_018743574.1	1306514	1314430	-	LOC110681889	--	--	--	--	--	--	--	--
gene-LOC110681901	4.12	3.35	4.93	4.93	7.55	6.83	310	264	386	378	653	506	2.036	1.026	0.00199108	0.0130583	up	NW_018743574.1	1418798	1441340	-	LOC110681901	--	K14726 solute carrier family 9 (sodium/hydrogen exchanger), member 10/11 | (RefSeq) probable sodium/hydrogen antiporter (A)	sodium/hydrogen exchanger 8-like [Chenopodium quinoa]	RecName: Full=Sodium/hydrogen exchanger 7; AltName: Full=Na(+)/H(+) exchanger 7; Short=NHE-7; AltName: Full=Protein SALT OVERLY SENSITIVE 1;	SubName: Full=Salt overly sensitive 1B {ECO:0000313|EMBL:ACN66494.1};	Sodium/hydrogen exchanger protein	GO:0009941,chloroplast envelope; GO:0016021,integral component of membrane; GO:0005886,plasma membrane; GO:0015386,potassium:proton antiporter activity; GO:0015385,sodium:proton antiporter activity; GO:0071805,potassium ion transmembrane transport; GO:0051453,regulation of intracellular pH; GO:2000377,regulation of reactive oxygen species metabolic process; GO:0042542,response to hydrogen peroxid…	Sodium/hydrogen exchanger family
gene-LOC110681912	0.87	0.29	0.86	1	2.11	2.13	29	10	30	34	81	70	3.386	1.76	0.00479103	0.0253463	up	NW_018743574.1	1548007	1549803	+	LOC110681912	--	K21995 unsaturated fatty acid epoxidase [EC:1.14.-.-] | (RefSeq) cytochrome P450 77A1 (A)	cytochrome P450 89A2-like [Chenopodium quinoa]	RecName: Full=Cytochrome P450 89A9; EC=1.14.-.-;	SubName: Full=Uncharacterized protein {ECO:0000313|EMBL:KNA17697.1};	Cytochrome P450 CYP2 subfamily	GO:0005789,endoplasmic reticulum membrane; GO:0016021,integral component of membrane; GO:0016020,membrane; GO:0020037,heme binding; GO:0005506,iron ion binding; GO:0016709,oxidoreductase activity, acting on paired donors, with incorporation or reduction of molecular oxygen, NAD(P)H as one donor, and incorporation of one atom of oxygen; GO:0044550,secondary metabolite biosynthetic process	Cytochrome P450
gene-LOC110681913	17.53	16.82	27.26	25.58	40.08	50.36	646	648	1045	961	1696	1827	2.47	1.305	0.000723769	0.0058852	up	NW_018743574.1	1550086	1553899	-	LOC110681913	--	K21995 unsaturated fatty acid epoxidase [EC:1.14.-.-] | (RefSeq) cytochrome P450 family 87 protein (A)	cytochrome P450 89A2-like [Chenopodium quinoa]	RecName: Full=Cytochrome P450 89A2; EC=1.14.-.-; AltName: Full=ATH 6-1; AltName: Full=CYPLXXXIX;	SubName: Full=Uncharacterized protein {ECO:0000313|EMBL:KNA17697.1};	Cytochrome P450 CYP2 subfamily	GO:0016021,integral component of membrane; GO:0016020,membrane; GO:0020037,heme binding; GO:0005506,iron ion binding; GO:0016709,oxidoreductase activity, acting on paired donors, with incorporation or reduction of molecular oxygen, NAD(P)H as one donor, and incorporation of one atom of oxygen; GO:0044550,secondary metabolite biosynthetic process	Cytochrome P450
gene-LOC110681919	22.86	14.19	21.66	23.34	31.69	37.04	686	445	676	714	1092	1094	2.044	1.032	0.00292202	0.0174147	up	NW_018742244.1	2965145	2967743	-	LOC110681919	--	K14677 aminoacylase [EC:3.5.1.14] | (RefSeq) uncharacterized protein LOC104719897 (A)	uncharacterized protein LOC110681919 [Chenopodium quinoa]	--	SubName: Full=Uncharacterized protein {ECO:0000313|EMBL:KNA17190.1};	Aminoacylase ACY1 and related metalloexopeptidases	--	--
gene-LOC110681922	14.82	10.29	16.14	21.38	39.39	50.71	459	333	520	675	1401	1546	3.559	1.832	1.16734e-05	0.000195829	up	NW_018743574.1	1625782	1630094	-	LOC110681922	--	--	uncharacterized protein LOC110681922 isoform X1 [Chenopodium quinoa]	--	SubName: Full=Uncharacterized protein {ECO:0000313|EMBL:KNA18353.1};	--	GO:0004222,metalloendopeptidase activity; GO:0071586,CAAX-box protein processing	Peptidase family M48
gene-LOC110681938	926.96	790.46	1161.48	1342.33	1700.23	1728.44	18773	16732	24469	27711	39538	34453	2.157	1.109	0.000109645	0.00127743	up	NW_018743574.1	1761404	1763439	+	LOC110681938	--	K02717 photosystem II oxygen-evolving enhancer protein 2 | (RefSeq) oxygen-evolving enhancer protein 2, chloroplastic-like (A)	oxygen-evolving enhancer protein 2, chloroplastic-like [Chenopodium quinoa]	RecName: Full=Oxygen-evolving enhancer protein 2, chloroplastic; Short=OEE2; AltName: Full=23 kDa subunit of oxygen evolving system of photosystem II; AltName: Full=23 kDa thylakoid membrane protein; AltName: Full=OEC 23 kDa subunit; Flags: Precursor;	SubName: Full=Uncharacterized protein {ECO:0000313|EMBL:KNA13956.1};	--	GO:0009535,chloroplast thylakoid membrane; GO:0019898,extrinsic component of membrane; GO:0009654,photosystem II oxygen evolving complex; GO:0005509,calcium ion binding; GO:0015979,photosynthesis	PsbP
gene-LOC110681944	0.41	0.39	0.27	5.39	10.46	8.71	16	16	11	214	468	334	30.58	4.935	2.34806e-29	1.55211e-26	up	NW_018743574.1	1808606	1813071	-	LOC110681944	--	K16871 4-aminobutyrate---pyruvate transaminase [EC:2.6.1.96] | (RefSeq) gamma aminobutyrate transaminase 3, chloroplastic-like (A)	gamma aminobutyrate transaminase 3, chloroplastic-like [Chenopodium quinoa]	RecName: Full=Gamma aminobutyrate transaminase 3, chloroplastic; AltName: Full=Gamma-aminobutyrate transaminase isozyme 3; Short=LeGABA-TP3; Short=SlGABA-T3; EC=2.6.1.96; Flags: Precursor;	SubName: Full=Uncharacterized protein {ECO:0000313|EMBL:KNA24573.1};	Alanine-glyoxylate aminotransferase AGT2	GO:0009507,chloroplast; GO:0034387,4-aminobutyrate:pyruvate transaminase activity; GO:0102351,gamma-aminobutyrate transaminase (glyoxylate dependent) activity; GO:0030170,pyridoxal phosphate binding	Aminotransferase class-III
gene-LOC110681977	5.81	5.1	6.54	9.72	8.98	8.7	245	225	287	418	435	361	2.026	1.019	8.15264e-06	0.000144689	up	NW_018743574.1	2202444	2207115	-	LOC110681977	--	K01184 polygalacturonase [EC:3.2.1.15] | (RefSeq) probable polygalacturonase At3g15720 (A)	probable polygalacturonase [Chenopodium quinoa]	RecName: Full=Probable polygalacturonase; Short=PG {ECO:0000250|UniProtKB:Q7M1E7}; EC=3.2.1.15; AltName: Full=Pectinase {ECO:0000250|UniProtKB:Q7M1E7};	SubName: Full=Uncharacterized protein {ECO:0000313|EMBL:KNA06024.1};	--	GO:0016021,integral component of membrane; GO:0004650,polygalacturonase activity; GO:0005975,carbohydrate metabolic process	Glycosyl hydrolases family 28
gene-LOC110681979	389.92	341.25	603.37	602.56	949.49	1006.86	5429	4966	8739	8552	15180	13798	2.504	1.324	0.000359353	0.00334314	up	NW_018743574.1	2200856	2201998	+	LOC110681979	--	K02701 photosystem I subunit PsaN | (RefSeq) photosystem I reaction center subunit N, chloroplastic-like (A)	photosystem I reaction center subunit N, chloroplastic-like [Chenopodium quinoa]	RecName: Full=Photosystem I reaction center subunit N, chloroplastic; Short=PSI-N; Flags: Precursor;	SubName: Full=Uncharacterized protein {ECO:0000313|EMBL:KNA06023.1};	--	GO:0009535,chloroplast thylakoid membrane; GO:0009522,photosystem I; GO:0019904,protein domain specific binding; GO:0015979,photosynthesis	Photosystem I reaction centre subunit N (PSAN or PSI-N)
gene-LOC110681981	0.08	0.04	0.12	0.32	0.07	2.01	2	1	3	8	2	48	13.084	3.71	0.00459429	0.0245224	up	NW_018743574.1	2208169	2209471	+	LOC110681981	--	--	uncharacterized protein LOC110681981 [Chenopodium quinoa]	--	SubName: Full=Uncharacterized protein {ECO:0000313|EMBL:KNA20593.1};	--	GO:0016021,integral component of membrane	--
gene-LOC110682029	1.01	0.93	0.97	1.38	1.53	3.05	26	25	26	36	45	77	2.685	1.425	0.00460265	0.0245636	up	NW_018743574.1	2707671	2709048	+	LOC110682029	--	K19040 E3 ubiquitin-protein ligase ATL10/75/76/77/78 [EC:2.3.2.27] | (RefSeq) RING-H2 finger protein ATL78-like (A)	RING-H2 finger protein ATL78-like [Chenopodium quinoa]	RecName: Full=RING-H2 finger protein ATL78; EC=2.3.2.27 {ECO:0000305}; AltName: Full=RING-type E3 ubiquitin transferase ATL78 {ECO:0000305};	SubName: Full=Uncharacterized protein {ECO:0000313|EMBL:KNA25175.1};	FOG: Predicted E3 ubiquitin ligase	GO:0016021,integral component of membrane; GO:0046872,metal ion binding; GO:0061630,ubiquitin protein ligase activity; GO:0043161,proteasome-mediated ubiquitin-dependent protein catabolic process	Ring finger domain
gene-LOC110682087	1.62	1.13	2.03	1.66	2.91	3.54	130	95	169	136	268	279	2.223	1.153	0.00874647	0.0403348	up	NW_018743574.1	3380689	3385553	-	LOC110682087	--	K05894 12-oxophytodienoic acid reductase [EC:1.3.1.42] | (RefSeq) artemisinic aldehyde Delta(11(13)) reductase-like isoform X1 (A)	artemisinic aldehyde Delta(11(13)) reductase-like isoform X1 [Chenopodium quinoa]	RecName: Full=12-oxophytodienoate reductase 3; EC=1.3.1.42; AltName: Full=12-oxophytodienoate-10,11-reductase 3; Short=AtOPR3; Short=OPDA-reductase 3; AltName: Full=Delayed dehiscence 1; Contains: RecName: Full=12-oxophytodienoate reductase 3, N-terminally processed;	SubName: Full=Uncharacterized protein {ECO:0000313|EMBL:KNA04621.1};	NADH:flavin oxidoreductase/12-oxophytodienoate reductase	GO:0005777,peroxisome; GO:0016629,12-oxophytodienoate reductase activity; GO:0010181,FMN binding; GO:0009695,jasmonic acid biosynthetic process; GO:0031408,oxylipin biosynthetic process; GO:0009620,response to fungus; GO:0010193,response to ozone; GO:0048443,stamen development	NADH:flavin oxidoreductase / NADH oxidase family
gene-LOC110682091	3.06	2.22	3.41	4.69	4.25	7.9	178	135	206	278	284	452	2.514	1.33	0.000421473	0.00380274	up	NW_018743574.1	3386152	3391112	-	LOC110682091	--	K17609 nucleoredoxin [EC:1.8.1.8] | (RefSeq) hypothetical protein (A)	putative U-box domain-containing protein 50 [Chenopodium quinoa]	RecName: Full=Putative U-box domain-containing protein 50; EC=2.3.2.27; AltName: Full=Plant U-box protein 50; AltName: Full=RING-type E3 ubiquitin transferase PUB50 {ECO:0000305};	SubName: Full=Uncharacterized protein {ECO:0000313|EMBL:KNA04622.1};	--	GO:0005524,ATP binding; GO:0004672,protein kinase activity; GO:0004842,ubiquitin-protein transferase activity	U-box domain
gene-LOC110682095	3.49	2.8	3.26	6.36	7.15	4.19	142	119	138	264	334	168	2.401	1.264	4.13517e-05	0.000572813	up	NW_018743574.1	3446374	3452370	+	LOC110682095	--	K21444 poly(rC)-binding protein 3/4 | (RefSeq) KH domain-containing protein HEN4-like (A)	KH domain-containing protein HEN4-like [Chenopodium quinoa]	RecName: Full=RNA-binding KH domain-containing protein RCF3 {ECO:0000305|PubMed:23087326}; AltName: Full=Protein ENHANCED STRESS RESPONSE 1 {ECO:0000303|PubMed:25985302}; AltName: Full=Protein HIGH OSMOTIC STRESS GENE EXPRESSION 5 {ECO:0000303|PubMed:24146632}; AltName: Full=Protein REGULATOR OF CBF GENE EXPRESSION 3 {ECO:0000303|PubMed:23087326}; AltName: Full=Protein SHINY 1 {ECO:0000303|PubMed…	SubName: Full=Uncharacterized protein {ECO:0000313|EMBL:KNA06234.1};	PolyC-binding proteins alphaCP-1 and related KH domain proteins	GO:0010445,nuclear dicing body; GO:0016607,nuclear speck; GO:0070878,primary miRNA binding; GO:0010286,heat acclimation; GO:0009867,jasmonic acid mediated signaling pathway; GO:0006397,mRNA processing; GO:0031053,primary miRNA processing; GO:1900150,regulation of defense response to fungus; GO:0010468,regulation of gene expression; GO:0006970,response to osmotic stress; GO:0008380,RNA splicing	KH domain
gene-LOC110682155	2.58	2.06	3.79	7.54	9.15	8.17	198	165	302	589	805	616	3.806	1.928	9.07749e-09	3.46176e-07	up	NW_018743574.1	4115653	4120549	-	LOC110682155	--	K05387 glutamate receptor, ionotropic, plant | (RefSeq) glutamate receptor 3.6-like (A)	glutamate receptor 3.6-like [Chenopodium quinoa]	RecName: Full=Glutamate receptor 3.6; AltName: Full=Ligand-gated ion channel 3.6; Flags: Precursor;	RecName: Full=Glutamate receptor {ECO:0000256|PIRNR:PIRNR037090};	Glutamate-gated kainate-type ion channel receptor subunit GluR5 and related subunits	GO:0016021,integral component of membrane; GO:0005622,intracellular; GO:0005886,plasma membrane; GO:0005262,calcium channel activity; GO:0008066,glutamate receptor activity; GO:0004970,ionotropic glutamate receptor activity; GO:0006816,calcium ion transport; GO:0019722,calcium-mediated signaling; GO:0007267,cell-cell signaling; GO:0071230,cellular response to amino acid stimulus; GO:0009864,induc…	Receptor family ligand binding region
gene-LOC110682157	12.68	9.71	9.97	12.87	18.67	24.6	471	377	385	487	796	899	2.29	1.195	0.000527528	0.00454833	up	NW_018743574.1	4126665	4128659	+	LOC110682157	--	K14209 solute carrier family 36 (proton-coupled amino acid transporter) | (RefSeq) amino acid transporter AVT3C-like (A)	amino acid transporter AVT3C-like [Chenopodium quinoa]	RecName: Full=Amino acid transporter AVT3C {ECO:0000305}; Short=AtAvt3C {ECO:0000303|PubMed:27925655}; AltName: Full=Aromatic and neutral amino acid transporter-like protein 2 {ECO:0000305};	SubName: Full=Uncharacterized protein {ECO:0000313|EMBL:KNA04970.1};	Amino acid transporters	GO:0016021,integral component of membrane; GO:0005774,vacuolar membrane; GO:0015171,amino acid transmembrane transporter activity; GO:0015175,neutral amino acid transmembrane transporter activity; GO:0003333,amino acid transmembrane transport; GO:0015804,neutral amino acid transport	Transmembrane amino acid transporter protein
gene-LOC110682168	1.32	1.66	2.37	2.57	2.92	3.32	58	76	108	115	147	143	2.144	1.1	0.00231036	0.0145836	up	NW_018743574.1	4193163	4198602	-	LOC110682168	--	K14431 transcription factor TGA | (RefSeq) transcription factor TGA4-like isoform X1 (A)	transcription factor TGA4-like isoform X1 [Chenopodium quinoa]	RecName: Full=Transcription factor TGA4; AltName: Full=Ocs element-binding factor 4; Short=OBF4; AltName: Full=bZIP transcription factor 57; Short=AtbZIP57;	SubName: Full=Uncharacterized protein {ECO:0000313|EMBL:KNA18624.1};	--	GO:0005634,nucleus; GO:0003700,DNA-binding transcription factor activity; GO:0043565,sequence-specific DNA binding; GO:0009409,response to cold; GO:0006351,transcription, DNA-templated	Seed dormancy control
gene-LOC110682171	3.44	2.34	3.02	3.91	4.73	7.34	69	49	63	80	109	145	2.379	1.251	0.00259506	0.0159453	up	NW_018743574.1	4223095	4225391	+	LOC110682171	--	K06123 1-acylglycerone phosphate reductase [EC:1.1.1.101] | (RefSeq) hypothetical protein (A)	NADPH-dependent 1-acyldihydroxyacetone phosphate reductase-like [Chenopodium quinoa]	RecName: Full=11-beta-hydroxysteroid dehydrogenase 1B; EC=1.1.1.146; AltName: Full=17-beta-hydroxysteroid dehydrogenase 1B; EC=1.1.1.-; AltName: Full=Hydroxysteroid dehydrogenase 1; Short=AtHSD1;	SubName: Full=Uncharacterized protein {ECO:0000313|EMBL:KNA06983.1}; Flags: Fragment;	1-Acyl dihydroxyacetone phosphate reductase and related dehydrogenases	GO:0016021,integral component of membrane; GO:0005811,lipid droplet; GO:0070524,11-beta-hydroxysteroid dehydrogenase (NADP+) activity; GO:0006694,steroid biosynthetic process	short chain dehydrogenase
gene-LOC110682177	32.64	25.12	36.39	41.77	52.45	58.46	864	695	1002	1127	1594	1523	2.112	1.079	0.00032778	0.00311635	up	NW_018743574.1	4287892	4290058	-	LOC110682177	--	K01802 peptidylprolyl isomerase [EC:5.2.1.8] | (RefSeq) photosynthetic NDH subunit of lumenal location 4, chloroplastic-like (A)	photosynthetic NDH subunit of lumenal location 4, chloroplastic-like [Chenopodium quinoa]	RecName: Full=Photosynthetic NDH subunit of lumenal location 4, chloroplastic {ECO:0000303|PubMed:21785130}; AltName: Full=FK506-binding protein 16-2; Short=AtFKBP16-2; AltName: Full=Immunophilin FKBP16-2; AltName: Full=Peptidyl-prolyl cis-trans isomerase FKBP16-2; Short=PPIase FKBP16-2; EC=5.2.1.8; AltName: Full=Rotamase; Flags: Precursor;	RecName: Full=Peptidylprolyl isomerase {ECO:0000256|PROSITE-ProRule:PRU00277}; EC=5.2.1.8 {ECO:0000256|PROSITE-ProRule:PRU00277};	FKBP-type peptidyl-prolyl cis-trans isomerase	GO:0009507,chloroplast; GO:0009543,chloroplast thylakoid lumen; GO:0009535,chloroplast thylakoid membrane; GO:0009579,thylakoid; GO:0005528,FK506 binding; GO:0003755,peptidyl-prolyl cis-trans isomerase activity; GO:0061077,chaperone-mediated protein folding	FKBP-type peptidyl-prolyl cis-trans isomerase
gene-LOC110682187	1.46	0.6	0.6	7.37	1.27	2.54	14	6	6	72	14	24	5.149	2.364	0.00267209	0.0163254	up	NW_018743574.1	4355024	4356455	-	LOC110682187	--	--	--	--	--	--	--	--
gene-LOC110682194	5.26	3.61	6.4	14.06	22.65	19.15	155	111	196	422	766	555	4.769	2.254	1.55838e-09	6.94872e-08	up	NW_018743574.1	4555399	4558134	+	LOC110682194	--	K01087 trehalose 6-phosphate phosphatase [EC:3.1.3.12] | (RefSeq) probable trehalose-phosphate phosphatase I (A)	probable trehalose-phosphate phosphatase I [Chenopodium quinoa]	RecName: Full=Probable trehalose-phosphate phosphatase J; Short=AtTPPJ; EC=3.1.3.12; AltName: Full=Trehalose 6-phosphate phosphatase;	RecName: Full=Trehalose 6-phosphate phosphatase {ECO:0000256|RuleBase:RU361117}; EC=3.1.3.12 {ECO:0000256|RuleBase:RU361117};	Trehalose-6-phosphate synthase component TPS1 and related subunits	GO:0005730,nucleolus; GO:0005634,nucleus; GO:0004805,trehalose-phosphatase activity; GO:0046686,response to cadmium ion; GO:0005992,trehalose biosynthetic process	Trehalose-phosphatase
gene-LOC110682210	1.68	1.41	2.57	2.12	3.75	3.71	122	107	194	157	312	265	2.214	1.147	0.00652695	0.0321467	up	NW_018743574.1	4722466	4727949	-	LOC110682210	--	K03063 26S proteasome regulatory subunit T3 | (RefSeq) 26S protease regulatory subunit 6B homolog (A)	BTB/POZ domain-containing protein DOT3-like [Chenopodium quinoa]	RecName: Full=BTB/POZ domain-containing protein DOT3; AltName: Full=Protein DEFECTIVELY ORGANIZED TRIBUTARIES 3 {ECO:0000303|PubMed:18643975};	SubName: Full=Uncharacterized protein {ECO:0000313|EMBL:KNA22061.1};	--	GO:0010588,cotyledon vascular tissue pattern formation; GO:0010305,leaf vascular tissue pattern formation; GO:0010087,phloem or xylem histogenesis; GO:0080022,primary root development; GO:0016567,protein ubiquitination; GO:0048367,shoot system development	NPH3 family
gene-LOC110682227	1.05	1.52	1.3	1.38	2.56	3.11	35	53	45	47	98	102	2.44	1.287	0.00463543	0.0247245	up	NW_018743574.1	4857356	4859146	-	LOC110682227	--	--	molybdate transporter 1-like [Chenopodium quinoa]	RecName: Full=Molybdate transporter 1; AltName: Full=Sulfate transporter like protein 5.2;	SubName: Full=Uncharacterized protein {ECO:0000313|EMBL:KNA05899.1};	--	GO:0016021,integral component of membrane; GO:0031966,mitochondrial membrane; GO:0005739,mitochondrion; GO:0005773,vacuole; GO:0015098,molybdate ion transmembrane transporter activity; GO:0015689,molybdate ion transport	Molybdate transporter of MFS superfamily
gene-LOC110682234	3.26	3.89	3.88	4.46	5.68	6.6	102	127	126	142	204	203	2.001	1	0.000960585	0.00738179	up	NW_018743574.1	4915312	4918391	+	LOC110682234	--	K17605 serine/threonine-protein phosphatase 2A activator | (RefSeq) serine/threonine-protein phosphatase 2A activator 2-like isoform X1 (A)	F-box protein FBW2-like [Chenopodium quinoa]	RecName: Full=F-box protein FBW2; AltName: Full=SKP1-interacting partner 18;	SubName: Full=Uncharacterized protein {ECO:0000313|EMBL:KNA15134.1};	Leucine rich repeat proteins, some proteins contain F-box	GO:0005634,nucleus; GO:0010629,negative regulation of gene expression; GO:0010608,posttranscriptional regulation of gene expression; GO:0016567,protein ubiquitination; GO:0009737,response to abscisic acid; GO:0006511,ubiquitin-dependent protein catabolic process	Leucine Rich repeat
gene-LOC110682246	0	0	0	1.22	0.7	0.41	0	0	0	31	20	10	137.023	7.098	8.21657e-07	1.96063e-05	up	NW_018743574.1	5027596	5030183	-	LOC110682246	--	K20802 (R)-mandelonitrile lyase [EC:4.1.2.10] | (RefSeq) MES5; methyl esterase 5 (A)	salicylic acid-binding protein 2-like [Chenopodium quinoa]	RecName: Full=Salicylic acid-binding protein 2; Short=NtSABP2; EC=3.1.1.-; AltName: Full=Methyl salicylate esterase;	SubName: Full=Uncharacterized protein {ECO:0000313|EMBL:KNA19362.1};	--	GO:0016298,lipase activity; GO:0080031,methyl salicylate esterase activity; GO:0009862,systemic acquired resistance, salicylic acid mediated signaling pathway	Alpha/beta hydrolase family
gene-LOC110682268	0	0	0	0.11	0.7	0.78	0	0	0	3	21	20	105.399	6.72	6.19129e-05	0.000797285	up	NW_018743574.1	5267369	5270337	+	LOC110682268	--	K15634 probable phosphoglycerate mutase [EC:5.4.2.12] | (RefSeq) phosphoglycerate mutase-like protein 4 isoform X1 (A)	phosphoglycerate mutase-like protein 4 isoform X1 [Chenopodium quinoa]	RecName: Full=Phosphoglycerate mutase-like protein 4 {ECO:0000305};	SubName: Full=Uncharacterized protein {ECO:0000313|EMBL:KNA24193.1};	Phosphoglycerate mutase	GO:0005829,cytosol; GO:0016791,phosphatase activity	Histidine phosphatase superfamily (branch 1)
gene-LOC110682289	1.02	0.64	1.44	1.98	3.21	4.56	43	28	63	85	155	189	4.109	2.039	6.58753e-05	0.000837964	up	NW_018743574.1	5544785	5549620	-	LOC110682289	--	--	uncharacterized membrane protein At3g27390-like [Chenopodium quinoa]	RecName: Full=Uncharacterized membrane protein At3g27390;	SubName: Full=Uncharacterized protein {ECO:0000313|EMBL:KNA03843.1}; Flags: Fragment;	--	GO:0016021,integral component of membrane; GO:0005886,plasma membrane	--
gene-LOC110682292	0.06	0.34	0.16	0.52	0.55	0.71	3	19	9	28	33	37	4.218	2.077	0.00184019	0.0123165	up	NW_018743574.1	5564938	5570022	+	LOC110682292	--	--	B3 domain-containing protein Os01g0234100-like isoform X2 [Chenopodium quinoa]	RecName: Full=B3 domain-containing protein Os01g0234100;	SubName: Full=Uncharacterized protein {ECO:0000313|EMBL:KNA13590.1};	--	GO:0005634,nucleus; GO:0003677,DNA binding; GO:0006355,regulation of transcription, DNA-templated; GO:0006351,transcription, DNA-templated	B3 DNA binding domain
gene-LOC110682301	4.98	4.66	2.8	5.18	14.03	17.86	193	189	113	205	625	682	4.045	2.016	5.38539e-05	0.000711967	up	NW_018743574.1	5670373	5676049	-	LOC110682301	--	K09843 (+)-abscisic acid 8'-hydroxylase [EC:1.14.14.137] | (RefSeq) abscisic acid 8'-hydroxylase 4-like (A)	abscisic acid 8'-hydroxylase 4-like [Chenopodium quinoa]	RecName: Full=Abscisic acid 8'-hydroxylase 4; Short=ABA 8'-hydroxylase 4; EC=1.14.13.93; AltName: Full=Cytochrome P450 707A4;	SubName: Full=Uncharacterized protein {ECO:0000313|EMBL:KMS95967.1};	Cytochrome P450 CYP4/CYP19/CYP26 subfamilies	GO:0016021,integral component of membrane; GO:0010295,(+)-abscisic acid 8'-hydroxylase activity; GO:0020037,heme binding; GO:0005506,iron ion binding; GO:0046345,abscisic acid catabolic process; GO:0016132,brassinosteroid biosynthetic process; GO:0010268,brassinosteroid homeostasis; GO:0007275,multicellular organism development; GO:0016125,sterol metabolic process	Cytochrome P450
gene-LOC110682304	0.74	0.7	0.45	1.11	1.37	3.02	22	22	14	34	47	89	3.89	1.96	0.000590518	0.00498756	up	NW_018743574.1	5689694	5693430	-	LOC110682304	--	K09419 heat shock transcription factor, other eukaryote | (RefSeq) heat shock factor protein HSF24-like (A)	heat shock factor protein HSF24-like [Chenopodium quinoa]	RecName: Full=Heat shock factor protein HSF24; AltName: Full=Heat shock transcription factor 24; Short=HSTF 24; AltName: Full=Heat stress transcription factor;	SubName: Full=Uncharacterized protein {ECO:0000313|EMBL:KMS95964.1};	Heat shock transcription factor	GO:0005634,nucleus; GO:0003700,DNA-binding transcription factor activity; GO:0043565,sequence-specific DNA binding; GO:0006351,transcription, DNA-templated	HSF-type DNA-binding
gene-LOC110682308	153.51	105.42	147.02	189.41	267.14	282.93	7678	5511	7649	9657	15342	13928	2.38	1.251	7.26183e-05	0.000909612	up	NW_018743574.1	5741523	5748371	-	LOC110682308	--	K09838 zeaxanthin epoxidase [EC:1.14.15.21] | (RefSeq) zeaxanthin epoxidase, chloroplastic-like isoform X1 (A)	zeaxanthin epoxidase, chloroplastic-like isoform X1 [Chenopodium quinoa]	RecName: Full=Zeaxanthin epoxidase, chloroplastic {ECO:0000255|PIRNR:PIRNR036989}; EC=1.14.15.21 {ECO:0000269|PubMed:8521963}; Flags: Precursor;	RecName: Full=Zeaxanthin epoxidase, chloroplastic {ECO:0000256|PIRNR:PIRNR036989}; EC=1.14.15.21 {ECO:0000256|PIRNR:PIRNR036989};	Kynurenine 3-monooxygenase and related flavoprotein monooxygenases	GO:0009535,chloroplast thylakoid membrane; GO:0071949,FAD binding; GO:0009540,zeaxanthin epoxidase [overall] activity; GO:0009688,abscisic acid biosynthetic process	FAD binding domain
gene-LOC110682331	0.9	0.58	0.59	1.37	2.07	1.72	25	17	17	39	66	47	3.279	1.713	0.000245176	0.00247727	up	NW_018743574.1	6087638	6089132	-	LOC110682331	--	K09286 EREBP-like factor | (RefSeq) ethylene-responsive transcription factor ERF010-like (A)	ethylene-responsive transcription factor ERF010-like [Chenopodium quinoa]	RecName: Full=Ethylene-responsive transcription factor ERF010;	SubName: Full=Uncharacterized protein {ECO:0000313|EMBL:KNA07728.1};	--	GO:0005634,nucleus; GO:0003677,DNA binding; GO:0003700,DNA-binding transcription factor activity; GO:0009873,ethylene-activated signaling pathway; GO:0006351,transcription, DNA-templated	AP2 domain
gene-LOC110682335	1.28	1.71	1.58	2.97	2.77	2.45	35	49	45	83	87	66	2.334	1.223	6.35737e-05	0.000815015	up	NW_018743574.1	6165266	6177209	-	LOC110682335	--	K11091 U1 small nuclear ribonucleoprotein A | (RefSeq) hypothetical protein (A)	RNA binding protein fox-1 homolog 3-like isoform X1 [Chenopodium quinoa]	--	SubName: Full=Uncharacterized protein {ECO:0000313|EMBL:KNA03590.1}; Flags: Fragment;	RNA binding protein (contains RRM repeats)	GO:0003723,RNA binding	RNA recognition motif. (a.k.a. RRM, RBD, or RNP domain)
gene-LOC110682357	5.02	5.32	7.73	8.71	8.84	12.22	174	193	279	308	352	417	2.14	1.098	0.000747081	0.00602236	up	NW_018743574.1	6483174	6485849	-	LOC110682357	--	--	putative oxidoreductase TDA3 [Chenopodium quinoa]	--	SubName: Full=Uncharacterized protein {ECO:0000313|EMBL:KNA05926.1};	Possible oxidoreductase	GO:0016491,oxidoreductase activity	FAD dependent oxidoreductase
gene-LOC110682395	40.87	34.57	41.01	52.13	73.14	90.61	913	807	953	1187	1876	1992	2.438	1.286	4.22684e-05	0.000582086	up	NW_018743574.1	6854207	6856774	-	LOC110682395	--	--	uncharacterized protein ycf36-like [Chenopodium quinoa]	RecName: Full=Protein CONSERVED IN THE GREEN LINEAGE AND DIATOMS 27, chloroplastic {ECO:0000303|PubMed:23043051}; Flags: Precursor;	SubName: Full=Uncharacterized protein {ECO:0000313|EMBL:KNA10187.1};	--	GO:0009507,chloroplast; GO:0016021,integral component of membrane; GO:1990641,response to iron ion starvation	Conserved in the green lineage and diatoms 27
gene-LOC110682397	0.79	1.07	0.85	1.87	1.99	1.66	17	24	19	41	49	35	2.667	1.415	0.000535931	0.00461023	up	NW_018743574.1	6855944	6857756	+	LOC110682397	--	--	--	--	--	--	--	--
gene-LOC110682398	3.28	1.49	2.52	17.73	4.44	9.41	126	60	101	695	196	356	5.327	2.413	1.59937e-06	3.54476e-05	up	NW_018742244.1	3484469	3491484	+	LOC110682398	--	K15406 wax-ester synthase / diacylglycerol O-acyltransferase [EC:2.3.1.75 2.3.1.20] | (RefSeq) O-acyltransferase WSD1 (A)	O-acyltransferase WSD1-like [Chenopodium quinoa]	RecName: Full=O-acyltransferase WSD1; AltName: Full=Diacylglycerol O-acyltransferase; Short=DGAT; EC=2.3.1.20; AltName: Full=Long-chain-alcohol O-fatty-acyltransferase; EC=2.3.1.75; AltName: Full=Wax synthase; Short=WS;	SubName: Full=Uncharacterized protein {ECO:0000313|EMBL:CAN72806.1};	--	GO:0005783,endoplasmic reticulum; GO:0005789,endoplasmic reticulum membrane; GO:0016021,integral component of membrane; GO:0005886,plasma membrane; GO:0102966,arachidoyl-CoA:1-dodecanol O-acyltransferase activity; GO:0004144,diacylglycerol O-acyltransferase activity; GO:0047196,long-chain-alcohol O-fatty-acyltransferase activity; GO:0103095,wax ester synthase activity; GO:0019432,triglyceride bio…	Protein of unknown function (DUF1298)
gene-LOC110682401	1.71	1.25	0.98	3.41	3.02	3.24	30	23	18	61	61	56	3.192	1.674	1.69223e-05	0.000269826	up	NW_018743574.1	6889062	6890180	-	LOC110682401	--	--	protein PFC0760c-like [Chenopodium quinoa]	--	SubName: Full=Uncharacterized protein {ECO:0000313|EMBL:KNA21451.1};	--	GO:0016021,integral component of membrane	--
gene-LOC110682409	2.32	3.32	3	6.02	7.46	7.7	87	130	117	230	321	284	3.234	1.693	1.36766e-09	6.18615e-08	up	NW_018743574.1	6981535	6984260	-	LOC110682409	--	--	uncharacterized protein LOC110682409 [Chenopodium quinoa]	--	SubName: Full=Uncharacterized protein {ECO:0000313|EMBL:KNA02750.1};	--	--	--
gene-LOC110682410	2.19	3.25	5.15	6.29	13.24	12.34	58	90	142	170	403	322	3.98	1.993	2.73179e-05	0.000404117	up	NW_018743574.1	6997162	6999821	+	LOC110682410	--	K00430 peroxidase [EC:1.11.1.7] | (RefSeq) peroxidase 50-like (A)	peroxidase 50-like [Chenopodium quinoa]	RecName: Full=Peroxidase 35; Short=Atperox P35; EC=1.11.1.7; AltName: Full=ATP21a; Flags: Precursor;	RecName: Full=Peroxidase {ECO:0000256|RuleBase:RU362060, ECO:0000256|SAAS:SAAS00709852}; EC=1.11.1.7 {ECO:0000256|RuleBase:RU362060, ECO:0000256|SAAS:SAAS00709852};	--	GO:0005576,extracellular region; GO:0020037,heme binding; GO:0046872,metal ion binding; GO:0004601,peroxidase activity; GO:0042744,hydrogen peroxide catabolic process; GO:0006979,response to oxidative stress	Peroxidase
gene-LOC110682419	0.22	0.41	0.16	0.63	0.5	1.04	9	18	7	27	24	43	3.68	1.88	0.00194281	0.0128089	up	NW_018743574.1	7131126	7134013	+	LOC110682419	--	--	probable N-acetyltransferase HLS1 [Chenopodium quinoa]	RecName: Full=Probable N-acetyltransferase HLS1-like; EC=2.3.1.-;	SubName: Full=Uncharacterized protein {ECO:0000313|EMBL:KNA07929.1};	--	GO:0008080,N-acetyltransferase activity; GO:0016747,transferase activity, transferring acyl groups other than amino-acyl groups; GO:0006473,protein acetylation	Acetyltransferase (GNAT) family
gene-LOC110682439	0.08	0.12	0.27	1.03	0.38	0.54	3	5	11	41	17	21	5.177	2.372	0.00126799	0.00919353	up	NW_018743574.1	7323099	7328208	-	LOC110682439	--	--	uncharacterized protein LOC110682439 isoform X1 [Chenopodium quinoa]	--	SubName: Full=Uncharacterized protein {ECO:0000313|EMBL:KNA24060.1};	--	GO:0016021,integral component of membrane; GO:0004553,hydrolase activity, hydrolyzing O-glycosyl compounds; GO:0005975,carbohydrate metabolic process	Glycosyl hydrolases family 43
gene-LOC110682443	0.9	0.71	1.34	1.41	2.88	1.43	59	49	92	95	218	93	2.54	1.345	0.0053631	0.0276432	up	NW_018743574.1	7390815	7412874	-	LOC110682443	--	K14682 amino-acid N-acetyltransferase [EC:2.3.1.1] | (RefSeq) probable amino-acid acetyltransferase NAGS2, chloroplastic isoform X1 (A)	probable amino-acid acetyltransferase NAGS2, chloroplastic isoform X1 [Chenopodium quinoa]	RecName: Full=Probable amino-acid acetyltransferase NAGS2, chloroplastic; EC=2.3.1.1; AltName: Full=N-acetylglutamate synthase 2; Flags: Precursor;	SubName: Full=Uncharacterized protein {ECO:0000313|EMBL:KNA08687.1};	Acetylglutamate kinase/acetylglutamate synthase	GO:0009507,chloroplast; GO:0004042,acetyl-CoA:L-glutamate N-acetyltransferase activity; GO:0103045,methione N-acyltransferase activity; GO:0006526,arginine biosynthetic process	Amino acid kinase family
gene-LOC110682457	0.68	0.42	0.52	0.6	1.79	1.45	29	19	23	26	88	61	3.162	1.661	0.00439508	0.0237552	up	NW_018743574.1	7553520	7557873	-	LOC110682457	--	K00688 glycogen phosphorylase [EC:2.4.1.1] | (RefSeq) glycogen phosphorylase 1-like isoform X1 (A)	ACT domain-containing protein ACR1-like [Chenopodium quinoa]	RecName: Full=ACT domain-containing protein ACR1 {ECO:0000305}; AltName: Full=Protein ACT DOMAIN REPEATS 1 {ECO:0000303|PubMed:12481063};	SubName: Full=Uncharacterized protein {ECO:0000313|EMBL:KNA19451.1};	--	GO:0005634,nucleus; GO:0016597,amino acid binding	ACT domain
gene-LOC110682458	5.01	4.92	4.23	4.21	8.22	10.08	189	194	166	162	356	374	2.126	1.088	0.00658991	0.0323933	up	NW_018743574.1	7562620	7564645	+	LOC110682458	--	--	protein PHLOEM PROTEIN 2-LIKE A10-like [Chenopodium quinoa]	RecName: Full=Protein PHLOEM PROTEIN 2-LIKE A10; Short=AtPP2-A10;	SubName: Full=Uncharacterized protein {ECO:0000313|EMBL:KNA02661.1};	--	GO:0016021,integral component of membrane; GO:0030246,carbohydrate binding	--
gene-LOC110682461	8.82	8.35	7.55	8.75	19.09	23.55	91	90	81	92	226	239	2.784	1.477	0.00100924	0.00765269	up	NW_018743574.1	7600192	7601120	+	LOC110682461	--	--	phytosulfokines 3-like [Chenopodium quinoa]	RecName: Full=Phytosulfokines 3; Short=AtPSK3; Contains: RecName: Full=Phytosulfokine-alpha; Short=PSK-alpha; Short=Phytosulfokine-a; Contains: RecName: Full=Phytosulfokine-beta; Short=PSK-beta; Short=Phytosulfokine-b; Flags: Precursor;	SubName: Full=Phytosulfokine-alpha peptide {ECO:0000313|EMBL:CAK22422.1};	--	GO:0031012,extracellular matrix; GO:0005794,Golgi apparatus; GO:0008083,growth factor activity; GO:0030154,cell differentiation; GO:0008283,cell proliferation; GO:0007275,multicellular organism development	Phytosulfokine precursor protein (PSK)
gene-LOC110682466	10.03	8.05	7.75	9.36	14.49	18.71	311	261	250	296	516	571	2.183	1.126	0.00165066	0.0113079	up	NW_018743574.1	7663329	7667507	+	LOC110682466	--	K10878 meiotic recombination protein SPO11 | (RefSeq) DNA topoisomerase 6 subunit A-like (A)	thioredoxin-like protein AAED1, chloroplastic [Chenopodium quinoa]	RecName: Full=Thioredoxin-like protein AAED1, chloroplastic; AltName: Full=AhpC/TSA antioxidant enzyme domain-containing protein 1; Flags: Precursor;	SubName: Full=Uncharacterized protein {ECO:0000313|EMBL:KDO78865.1};	Uncharacterized conserved protein	GO:0009507,chloroplast; GO:0016209,antioxidant activity; GO:0055114,oxidation-reduction process	AhpC/TSA antioxidant enzyme
gene-LOC110682481	3.19	3.91	3.39	8.48	9.04	10.02	68	87	75	184	221	210	3.447	1.785	2.87069e-12	2.16324e-10	up	NW_018743574.1	7921386	7923830	+	LOC110682481	--	K00384 thioredoxin reductase (NADPH) [EC:1.8.1.9] | (RefSeq) thioredoxin reductase 1-like (A)	germin-like protein subfamily 2 member 4 [Chenopodium quinoa]	RecName: Full=Germin-like protein subfamily 2 member 4; Flags: Precursor;	SubName: Full=Uncharacterized protein {ECO:0000313|EMBL:KNA15705.1};	--	GO:0048046,apoplast; GO:0005618,cell wall; GO:0009505,plant-type cell wall; GO:0009506,plasmodesma; GO:0030145,manganese ion binding; GO:0045735,nutrient reservoir activity; GO:0010497,plasmodesmata-mediated intercellular transport; GO:2000280,regulation of root development	Cupin
gene-LOC110682486	1.48	0.87	0.7	4.04	6.05	3.35	47	29	23	131	221	105	5.803	2.537	1.03695e-08	3.89639e-07	up	NW_018742244.1	3562594	3564302	-	LOC110682486	--	K23260 scopoletin glucosyltransferase [EC:2.4.1.128] | (RefSeq) scopoletin glucosyltransferase-like (A)	scopoletin glucosyltransferase-like [Chenopodium quinoa]	RecName: Full=Scopoletin glucosyltransferase; EC=2.4.1.128; AltName: Full=Phenylpropanoid:glucosyltransferase 1;	RecName: Full=Glycosyltransferase {ECO:0000256|RuleBase:RU362057}; EC=2.4.1.- {ECO:0000256|RuleBase:RU362057};	UDP-glucuronosyl and UDP-glucosyl transferase	GO:0042802,identical protein binding; GO:0050275,scopoletin glucosyltransferase activity; GO:0008152,metabolic process	UDP-glucoronosyl and UDP-glucosyl transferase
gene-LOC110682490	3.66	4.28	3.78	6.56	7.76	5.73	94	115	101	172	229	145	2.245	1.167	7.31975e-06	0.000132348	up	NW_018743574.1	7996807	8000243	-	LOC110682490	--	K07943 ADP-ribosylation factor-like protein 2 | (RefSeq) ADP-ribosylation factor-like protein 2 (A)	ADP-ribosylation factor-like protein 2 [Chenopodium quinoa]	RecName: Full=ADP-ribosylation factor-like protein 2; AltName: Full=Protein ARF-like 2; AltName: Full=Protein HALLIMASCH; AltName: Full=Protein TITAN 5;	SubName: Full=ADP-ribosylation factor-like protein 2 {ECO:0000313|EMBL:OAY73805.1};	GTP-binding ADP-ribosylation factor-like protein ARL2	GO:0005737,cytoplasm; GO:0005525,GTP binding; GO:0009793,embryo development ending in seed dormancy; GO:0009558,embryo sac cellularization; GO:0009960,endosperm development; GO:0007264,small GTPase mediated signal transduction; GO:0007021,tubulin complex assembly	ADP-ribosylation factor family
gene-LOC110682499	3.5	0.94	3.42	3.13	6.95	12.1	57	16	58	52	130	194	3.682	1.881	0.00595872	0.029971	up	NW_018743574.1	8102908	8104734	-	LOC110682499	--	K15397 3-ketoacyl-CoA synthase [EC:2.3.1.199] | (RefSeq) 3-ketoacyl-CoA synthase 17-like (A)	protein RADIALIS-like 3 [Chenopodium quinoa]	RecName: Full=Transcription factor RADIALIS;	SubName: Full=Uncharacterized protein {ECO:0000313|EMBL:KNA12251.1};	Zuotin and related molecular chaperones (DnaJ superfamily), contains DNA-binding domains	GO:0005634,nucleus; GO:0003677,DNA binding; GO:0048262,determination of dorsal/ventral asymmetry; GO:0009908,flower development; GO:0006355,regulation of transcription, DNA-templated; GO:0006351,transcription, DNA-templated	Myb-like DNA-binding domain
gene-LOC110682503	66.97	23.07	58.84	91.27	97.91	132.78	1683	606	1538	2338	2825	3284	2.771	1.47	0.000954314	0.00734709	up	NW_018743574.1	8181933	8185499	+	LOC110682503	--	K01792 glucose-6-phosphate 1-epimerase [EC:5.1.3.15] | (RefSeq) putative glucose-6-phosphate 1-epimerase (A)	putative glucose-6-phosphate 1-epimerase [Chenopodium quinoa]	RecName: Full=Putative glucose-6-phosphate 1-epimerase {ECO:0000250|UniProtKB:Q03161}; EC=5.1.3.15 {ECO:0000250|UniProtKB:Q03161}; AltName: Full=Putative D-hexose-6-phosphate mutarotase {ECO:0000250|UniProtKB:Q03161}; AltName: Full=Putative apospory-associated protein C;	RecName: Full=Glucose-6-phosphate 1-epimerase {ECO:0000256|PIRNR:PIRNR016020}; EC=5.1.3.15 {ECO:0000256|PIRNR:PIRNR016020};	Uncharacterized enzymes related to aldose 1-epimerase	GO:0030246,carbohydrate binding; GO:0047938,glucose-6-phosphate 1-epimerase activity; GO:0005975,carbohydrate metabolic process	Aldose 1-epimerase
gene-LOC110682509	25.66	19.36	15.88	31.49	46.21	65.64	738	582	475	923	1526	1858	3.124	1.644	9.08741e-06	0.000158516	up	NW_018743574.1	8214759	8218624	+	LOC110682509	--	K13699 abhydrolase domain-containing protein 5 [EC:2.3.1.51] | (RefSeq) hydrolase, alpha/beta fold family protein (A)	pheophytinase, chloroplastic-like isoform X1 [Chenopodium quinoa]	RecName: Full=Pheophytinase, chloroplastic; EC=3.1.1.-; AltName: Full=Pheophytin pheophorbide hydrolase; AltName: Full=Protein CO-REGULATED WITH NYE1; Flags: Precursor;	SubName: Full=Uncharacterized protein {ECO:0000313|EMBL:KNA06238.1};	Predicted hydrolase/acyltransferase (alpha/beta hydrolase superfamily)	GO:0009507,chloroplast; GO:0009570,chloroplast stroma; GO:0009535,chloroplast thylakoid membrane; GO:0080124,pheophytinase activity; GO:0015996,chlorophyll catabolic process	Alpha/beta hydrolase family
gene-LOC110682510	2.72	2.21	2.25	3.6	5.14	9.26	72	61	62	97	156	241	3.32	1.731	0.000132744	0.00149389	up	NW_018743574.1	8210478	8214081	-	LOC110682510	--	K16275 E3 ubiquitin-protein ligase BAH [EC:2.3.2.27] | (RefSeq) probable E3 ubiquitin-protein ligase BAH1-like 1 (A)	probable E3 ubiquitin-protein ligase BAH1-like 1 [Chenopodium quinoa]	RecName: Full=Probable E3 ubiquitin-protein ligase BAH1-like 1; EC=2.3.2.27 {ECO:0000305}; AltName: Full=RING-type E3 ubiquitin transferase BAH1-like 1 {ECO:0000305};	SubName: Full=Uncharacterized protein {ECO:0000313|EMBL:ESR57549.1};	--	GO:0046872,metal ion binding; GO:0016740,transferase activity; GO:0016567,protein ubiquitination	Zinc finger, C3HC4 type (RING finger)
gene-LOC110682533	1.27	1.5	1.8	2.1	3.55	5.22	42	52	62	71	135	170	3.156	1.658	0.000328111	0.00311871	up	NW_018743574.1	8437600	8443534	-	LOC110682533	--	K08999 uncharacterized protein | (RefSeq) hypothetical protein (A)	bifunctional nuclease 2-like [Chenopodium quinoa]	RecName: Full=Bifunctional nuclease 1; Short=AtBBD1; EC=3.1.-.-;	SubName: Full=Uncharacterized protein {ECO:0000313|EMBL:KNA13507.1};	--	GO:0005634,nucleus; GO:0004518,nuclease activity; GO:0043565,sequence-specific DNA binding; GO:0050832,defense response to fungus	Bifunctional nuclease
gene-LOC110682536	2.53	1.54	4.09	5.38	8.42	13.09	66	42	111	143	252	336	4.282	2.098	6.25413e-05	0.000803968	up	NW_018743574.1	8465718	8467118	+	LOC110682536	--	K09060 plant G-box-binding factor | (RefSeq) bZIP transcription factor 16-like (A)	bZIP transcription factor 11-like [Chenopodium quinoa]	RecName: Full=bZIP transcription factor 11 {ECO:0000305}; Short=AtbZIP11 {ECO:0000303|PubMed:11906833}; AltName: Full=G-box-binding factor 6 {ECO:0000303|Ref.3}; AltName: Full=bZIP transcription factor ATB2 {ECO:0000303|PubMed:9620274};	SubName: Full=Uncharacterized protein {ECO:0000313|EMBL:KNA05678.1};	--	GO:0005634,nucleus; GO:0003700,DNA-binding transcription factor activity; GO:0046982,protein heterodimerization activity; GO:0043565,sequence-specific DNA binding; GO:0017148,negative regulation of translation; GO:0045893,positive regulation of transcription, DNA-templated; GO:0009744,response to sucrose; GO:0080149,sucrose induced translational repression; GO:0006351,transcription, DNA-templated	bZIP transcription factor
gene-LOC110682600	0.57	0.22	0.47	0.59	1.37	1.71	20	8	17	21	55	59	3.845	1.943	0.00341405	0.0196269	up	NW_018742244.1	3714913	3717300	-	LOC110682600	--	--	uncharacterized protein LOC110682600 [Chenopodium quinoa]	--	SubName: Full=Uncharacterized protein {ECO:0000313|EMBL:KNA06968.1};	--	--	Root cap
gene-LOC110682624	0.64	1.19	1.46	1.62	2.2	4.39	14	27	33	36	55	94	3.31	1.727	0.00301326	0.0178484	up	NW_018742244.1	3720267	3723636	-	LOC110682624	--	--	uncharacterized protein LOC110682624 isoform X1 [Chenopodium quinoa]	--	SubName: Full=Uncharacterized protein {ECO:0000313|EMBL:KNA08225.1};	--	GO:0004061,arylformamidase activity; GO:0019441,tryptophan catabolic process to kynurenine	Putative cyclase
gene-LOC110682638	0.28	0.17	0.12	0.66	0.45	0.37	13	8	6	31	24	17	3.339	1.739	0.0039866	0.0220406	up	NW_018743575.1	569906	573726	-	LOC110682638	--	K11593 eukaryotic translation initiation factor 2C | (RefSeq) protein argonaute 3-like (A)	protein argonaute 3-like, partial [Chenopodium quinoa]	RecName: Full=Protein argonaute 2;	SubName: Full=Uncharacterized protein {ECO:0000313|EMBL:KNA04356.1}; Flags: Fragment;	Translation initiation factor 2C (eIF-2C) and related proteins	GO:0005829,cytosol; GO:0030529,NA; GO:0005634,nucleus; GO:0003729,mRNA binding; GO:0035197,siRNA binding; GO:0042742,defense response to bacterium; GO:0051607,defense response to virus; GO:0031047,gene silencing by RNA; GO:0019048,modulation by virus of host morphology or physiology; GO:0006355,regulation of transcription, DNA-templated; GO:0006417,regulation of translation; GO:0006351,transcript…	Piwi domain
gene-LOC110682676	0	0	0.56	0.48	4.08	7.84	0	0	6	5	48	79	28.603	4.838	0.000505277	0.004392	up	NW_018743575.1	872248	873476	+	LOC110682676	--	--	--	--	--	--	--	--
gene-LOC110682681	0.48	0.33	0.25	1.32	1.13	0.53	11	8	6	31	30	12	3.635	1.862	0.0038768	0.0215506	up	NW_018743575.1	1120029	1122371	+	LOC110682681	--	--	--	--	--	--	--	--
gene-LOC110682689	0.07	0.06	0.06	4.22	3.17	1.48	1	1	1	65	55	22	58.898	5.88	5.40937e-09	2.15221e-07	up	NW_018743591.1	434040	443919	-	LOC110682689	--	K06268 serine/threonine-protein phosphatase 2B regulatory subunit | (RefSeq) uncharacterized protein LOC110682689 (A)	uncharacterized protein LOC110682689 [Chenopodium quinoa]	RecName: Full=Calcineurin B-like protein 1; AltName: Full=SOS3-like calcium-binding protein 5;	SubName: Full=Uncharacterized protein {ECO:0000313|EMBL:KNA25577.1};	Ca2+/calmodulin-dependent protein phosphatase (calcineurin subunit B), EF-Hand superfamily protein	GO:0005737,cytoplasm; GO:0005886,plasma membrane; GO:0090406,pollen tube; GO:0005509,calcium ion binding; GO:0019900,kinase binding; GO:0009738,abscisic acid-activated signaling pathway; GO:0019722,calcium-mediated signaling; GO:0009860,pollen tube growth; GO:0009409,response to cold; GO:0006970,response to osmotic stress; GO:0009651,response to salt stress; GO:0009414,response to water deprivati…	EF hand
gene-LOC110682699	0	0	0	0.75	0.6	0.49	0	0	0	60	54	38	347.695	8.442	2.93347e-11	1.84828e-09	up	NW_018743591.1	276232	280709	-	LOC110682699	--	--	--	--	--	--	--	--
gene-LOC110682707	0	0	0	2.93	2.42	1.78	0	0	0	128	119	75	734.641	9.521	1.38574e-14	1.50902e-12	up	NW_018743591.1	681792	685075	+	LOC110682707	--	K23222 nuclease HARBI1 [EC:3.1.-.-] | (RefSeq) uncharacterized LOC107788612 (A)	uncharacterized protein LOC110682707 isoform X1 [Chenopodium quinoa]	--	SubName: Full=Uncharacterized protein {ECO:0000313|EMBL:KNA24023.1};	Predicted transposase	GO:0016021,integral component of membrane	--
gene-LOC110682717	0.62	0.34	1.36	14.26	0.77	1.53	7	4	16	164	10	17	8.214	3.038	0.00342967	0.0196941	up	NW_018743592.1	22462	25895	-	LOC110682717	--	--	uncharacterized protein LOC110738007 [Chenopodium quinoa]	--	SubName: Full=Uncharacterized protein {ECO:0000313|EMBL:KNA08153.1};	--	--	--
gene-LOC110682733	0	0	0	0	1.85	0.82	0	0	0	0	21	8	68.225	6.092	0.00822118	0.0384211	up	NW_018743593.1	3254301	3254831	+	LOC110682733	--	K17604 zinc finger SWIM domain-containing protein 3 | (RefSeq) uncharacterized protein LOC111991932 (A)	protein FAR-RED ELONGATED HYPOCOTYL 3-like [Chenopodium quinoa]	RecName: Full=Protein FAR-RED ELONGATED HYPOCOTYL 3;	SubName: Full=Uncharacterized protein {ECO:0000313|EMBL:KNA16107.1}; Flags: Fragment;	--	GO:0005634,nucleus; GO:0003700,DNA-binding transcription factor activity; GO:0008270,zinc ion binding; GO:0007623,circadian rhythm; GO:0010018,far-red light signaling pathway; GO:0042753,positive regulation of circadian rhythm; GO:0045893,positive regulation of transcription, DNA-templated; GO:0010017,red or far-red light signaling pathway; GO:0009585,red, far-red light phototransduction; GO:0010…	--
gene-LOC110682737	1.77	1.7	3.58	3.03	6.33	10.21	39	39	82	68	160	221	3.655	1.87	0.0012443	0.00906403	up	NW_018742249.1	58081	62511	-	LOC110682737	--	K01674 carbonic anhydrase [EC:4.2.1.1] | (RefSeq) alpha carbonic anhydrase 7-like (A)	alpha carbonic anhydrase 7-like [Chenopodium quinoa]	RecName: Full=Alpha carbonic anhydrase 7; Short=AtaCA7; Short=AtalphaCA7; EC=4.2.1.1; AltName: Full=Alpha carbonate dehydratase 7; Flags: Precursor;	SubName: Full=Uncharacterized protein {ECO:0000313|EMBL:KMS97057.1};	Carbonic anhydrase	GO:0009570,chloroplast stroma; GO:0004089,carbonate dehydratase activity; GO:0008270,zinc ion binding; GO:0006730,one-carbon metabolic process	Eukaryotic-type carbonic anhydrase
gene-LOC110682750	0	0	0	0.81	0.18	0.38	0	0	0	20	5	9	76.977	6.266	0.000119971	0.00137477	up	NW_018743593.1	778475	779906	+	LOC110682750	--	K17609 nucleoredoxin [EC:1.8.1.8] | (RefSeq) hypothetical protein (A)	uncharacterized protein LOC110682750 [Chenopodium quinoa]	--	SubName: Full=Uncharacterized protein {ECO:0000313|EMBL:KMS95847.1};	--	--	--
gene-LOC110682807	0.05	0.15	0	0.56	0.68	0.44	2	7	0	25	34	19	11.429	3.515	8.33376e-05	0.00101981	up	NW_018743593.1	3341589	3344301	+	LOC110682807	--	--	--	--	--	--	--	--
gene-LOC110682827	0	0	0.1	1.42	0.47	0.72	0	0	3	43	16	21	32.867	5.039	1.26519e-05	0.000209907	up	NW_018743593.1	779901	781491	+	LOC110682827	--	K17609 nucleoredoxin [EC:1.8.1.8] | (RefSeq) probable nucleoredoxin 1 (A)	probable nucleoredoxin 1, partial [Chenopodium quinoa]	RecName: Full=Probable nucleoredoxin 1; Short=AtNrx1; EC=1.8.1.8;	SubName: Full=Uncharacterized protein {ECO:0000313|EMBL:KMS95847.1};	Thioredoxin, nucleoredoxin and related proteins	GO:0005829,cytosol; GO:0047134,protein-disulfide reductase activity; GO:0004791,thioredoxin-disulfide reductase activity; GO:0045454,cell redox homeostasis; GO:0009860,pollen tube growth; GO:0010183,pollen tube guidance; GO:0080092,regulation of pollen tube growth; GO:0046686,response to cadmium ion	Thioredoxin-like
gene-LOC110682902	117.4	89.74	131.69	189.5	227.85	224.73	3243	2591	3784	5336	7227	6110	2.459	1.298	2.8688e-06	5.88408e-05	up	NW_018743613.1	295219	298224	-	LOC110682902	--	K15104 solute carrier family 25 (mitochondrial oxoglutarate transporter), member 11 | (RefSeq) mitochondrial dicarboxylate/tricarboxylate transporter DTC-like (A)	mitochondrial dicarboxylate/tricarboxylate transporter DTC-like [Chenopodium quinoa]	RecName: Full=Mitochondrial dicarboxylate/tricarboxylate transporter DTC; AltName: Full=Dicarboxylate/tricarboxylate carrier;	SubName: Full=Mitochondrial dicarboxylate transporter {ECO:0000313|EMBL:AHB08889.1};	Mitochondrial oxoglutarate/malate carrier proteins	GO:0005618,cell wall; GO:0009507,chloroplast; GO:0009941,chloroplast envelope; GO:0016021,integral component of membrane; GO:0005743,mitochondrial inner membrane; GO:0005739,mitochondrion; GO:0009506,plasmodesma; GO:0005774,vacuolar membrane; GO:0005310,dicarboxylic acid transmembrane transporter activity; GO:0015367,oxoglutarate:malate antiporter activity; GO:0015142,tricarboxylic acid transmemb…	Mitochondrial carrier protein
gene-LOC110682951	2.87	4.37	1.9	9.45	3.92	3.84	83	132	57	278	130	109	2.412	1.27	0.00283008	0.0170067	up	NW_018742263.1	4196635	4199537	+	LOC110682951	--	--	--	--	--	--	--	--
gene-LOC110682967	1.08	1.33	1.04	1.52	2.32	2.9	28	36	28	40	69	74	2.6	1.378	0.00170488	0.0116013	up	NW_018743616.1	225119	227926	+	LOC110682967	--	--	uncharacterized protein LOC110682967 isoform X1 [Chenopodium quinoa]	--	SubName: Full=Uncharacterized protein {ECO:0000313|EMBL:KNA21654.1};	N-acetyltransferase	GO:0008080,N-acetyltransferase activity	Acetyltransferase (GNAT) family
gene-LOC110682981	9.07	7.45	10.8	11.66	13.95	17.01	303	260	375	397	535	559	2.032	1.023	0.00108587	0.00812293	up	NW_018743616.1	924832	929036	+	LOC110682981	--	K22684 metacaspase-1 [EC:3.4.22.-] | (RefSeq) metacaspase-5-like (A)	metacaspase-5-like [Chenopodium quinoa]	RecName: Full=Metacaspase-4; Short=AtMC4; EC=3.4.22.-; AltName: Full=Metacaspase 2d; Short=AtMCP2d; AltName: Full=Metacaspase-7; Contains: RecName: Full=Metacaspase-4 subunit p20; Contains: RecName: Full=Metacaspase-4 subunit p10;	SubName: Full=Uncharacterized protein {ECO:0000313|EMBL:KNA25521.1};	Metacaspase involved in regulation of apoptosis	GO:0005737,cytoplasm; GO:0005829,cytosol; GO:0005886,plasma membrane; GO:0009506,plasmodesma; GO:0004197,cysteine-type endopeptidase activity; GO:0008234,cysteine-type peptidase activity; GO:0042802,identical protein binding; GO:0006952,defense response; GO:0043068,positive regulation of programmed cell death; GO:0016540,protein autoprocessing	Caspase domain
gene-LOC110683025	0	0	0	0.38	0.93	0.93	0	0	0	24	66	57	347.168	8.439	5.21554e-10	2.58908e-08	up	NW_018743616.1	1875066	1879674	-	LOC110683025	--	--	--	--	--	--	--	--
gene-LOC110683026	30.5	28.64	23.66	42.07	40.94	50.55	591	580	477	831	911	964	2.113	1.079	6.54544e-07	1.61084e-05	up	NW_018743616.1	1902300	1908605	-	LOC110683026	--	--	uncharacterized protein LOC110683026 [Chenopodium quinoa]	--	SubName: Full=Uncharacterized protein {ECO:0000313|EMBL:KNA09605.1};	--	GO:0016021,integral component of membrane	Protein of unknown function (DUF3007)
gene-LOC110683043	3.22	2.34	4.72	7.08	9.98	7.16	188	143	287	422	670	412	3.045	1.607	2.2811e-05	0.000347964	up	NW_018743616.1	2440391	2443530	-	LOC110683043	--	K13459 disease resistance protein RPS2 | (RefSeq) disease resistance protein RPS2-like (A)	disease resistance protein RPS2-like [Chenopodium quinoa]	RecName: Full=Disease resistance protein RPS2; AltName: Full=Resistance to Pseudomonas syringae protein 2;	SubName: Full=Uncharacterized protein {ECO:0000313|EMBL:KDP33865.1};	Apoptotic ATPase	GO:0005737,cytoplasm; GO:0005886,plasma membrane; GO:0043531,ADP binding; GO:0005524,ATP binding; GO:0006952,defense response; GO:0042742,defense response to bacterium; GO:0016045,detection of bacterium; GO:0009626,plant-type hypersensitive response; GO:0007165,signal transduction	NB-ARC domain
gene-LOC110683095	5.05	5.46	4.79	6.5	8.7	8.09	132	149	130	173	261	208	2.009	1.006	0.000200031	0.00208255	up	NW_018743616.1	3700183	3702998	+	LOC110683095	--	K13066 caffeic acid 3-O-methyltransferase [EC:2.1.1.68] | (RefSeq) COMT1-2; caffeic acid O-methyltransferase (A)	caffeic acid 3-O-methyltransferase-like [Chenopodium quinoa]	RecName: Full=Caffeic acid 3-O-methyltransferase; Short=CAOMT; Short=COMT; EC=2.1.1.68; AltName: Full=S-adenosysl-L-methionine:caffeic acid 3-O-methyltransferase;	SubName: Full=Uncharacterized protein {ECO:0000313|EMBL:KNA19751.1};	Hydroxyindole-O-methyltransferase and related SAM-dependent methyltransferases	GO:0047763,caffeate O-methyltransferase activity; GO:0046983,protein dimerization activity; GO:0009809,lignin biosynthetic process	O-methyltransferase domain
gene-LOC110683155	4	8.37	1.16	58.03	55.73	49.16	129	282	39	1907	2063	1560	16.336	4.03	2.23097e-14	2.348e-12	up	NW_018743623.1	136624	143742	-	LOC110683155	--	K01609 indole-3-glycerol phosphate synthase [EC:4.1.1.48] | (RefSeq) indole-3-glycerol phosphate synthase, chloroplastic-like isoform X1 (A)	indole-3-glycerol phosphate synthase, chloroplastic-like isoform X2 [Chenopodium quinoa]	RecName: Full=Indole-3-glycerol phosphate synthase, chloroplastic {ECO:0000303|PubMed:7610197}; Short=IGPS {ECO:0000303|PubMed:7610197}; EC=4.1.1.48 {ECO:0000269|PubMed:7610197}; Flags: Precursor;	SubName: Full=Uncharacterized protein {ECO:0000313|EMBL:KNA03126.1};	Anthranilate synthase component II	GO:0009507,chloroplast; GO:0009570,chloroplast stroma; GO:0005829,cytosol; GO:0005507,copper ion binding; GO:0004425,indole-3-glycerol-phosphate synthase activity; GO:0000162,tryptophan biosynthetic process	Indole-3-glycerol phosphate synthase
gene-LOC110683163	0.33	0.45	0.15	0.6	0.88	0.96	22	31	10	40	67	62	3.534	1.821	0.000468021	0.0041288	up	NW_018743623.1	212737	216401	+	LOC110683163	--	K15078 structure-specific endonuclease subunit SLX1 [EC:3.6.1.-] | (RefSeq) putative disease resistance protein RGA3 (A)	putative disease resistance protein RGA4 [Chenopodium quinoa]	RecName: Full=Putative disease resistance protein RGA3; AltName: Full=Blight resistance protein B149; AltName: Full=RGA1-blb;	SubName: Full=Uncharacterized protein {ECO:0000313|EMBL:KMS96021.1};	Apoptotic ATPase	GO:0043531,ADP binding; GO:0005524,ATP binding; GO:0006952,defense response	NB-ARC domain
gene-LOC110683171	1341.82	934.31	1645.33	1606.9	2225.94	2440.76	68337	49733	87165	83420	130169	122345	2.08	1.056	0.0022515	0.0142863	up	NW_018743623.1	332540	337999	+	LOC110683171	--	K00549 5-methyltetrahydropteroyltriglutamate--homocysteine methyltransferase [EC:2.1.1.14] | (RefSeq) 5-methyltetrahydropteroyltriglutamate-- homocysteine methyltransferase (A)	5-methyltetrahydropteroyltriglutamate--homocysteine methyltransferase [Chenopodium quinoa]	RecName: Full=5-methyltetrahydropteroyltriglutamate--homocysteine methyltransferase; EC=2.1.1.14; AltName: Full=Cobalamin-independent methionine synthase isozyme; AltName: Full=Vitamin-B12-independent methionine synthase isozyme;	SubName: Full=Uncharacterized protein {ECO:0000313|EMBL:KNA04237.1};	Methionine synthase II (cobalamin-independent)	GO:0005737,cytoplasm; GO:0003871,5-methyltetrahydropteroyltriglutamate-homocysteine S-methyltransferase activity; GO:0008270,zinc ion binding; GO:0009086,methionine biosynthetic process	Cobalamin-independent synthase, Catalytic domain
gene-LOC110683191	0.03	0	0.03	0.91	0.52	0.49	2	0	2	56	36	29	37.593	5.232	5.34833e-09	2.13469e-07	up	NW_018743623.1	861779	866062	+	LOC110683191	--	--	--	--	--	--	--	--
gene-LOC110683195	0.96	0.54	0.98	1.59	1.41	2.25	32	19	34	54	54	74	2.727	1.447	0.00179013	0.0120336	up	NW_018743623.1	931064	936099	-	LOC110683195	--	K17964 leucine-rich PPR motif-containing protein, mitochondrial | (RefSeq) putative pentatricopeptide repeat-containing protein At1g19290 (A)	pentatricopeptide repeat-containing protein At2g20710, mitochondrial-like [Chenopodium quinoa]	RecName: Full=Pentatricopeptide repeat-containing protein At2g20710, mitochondrial; Flags: Precursor;	SubName: Full=Uncharacterized protein {ECO:0000313|EMBL:KNA13220.1};	FOG: PPR repeat	GO:0043231,intracellular membrane-bounded organelle; GO:0005739,mitochondrion; GO:0004519,endonuclease activity; GO:0003723,RNA binding; GO:0009451,RNA modification	PPR repeat
gene-LOC110683259	29.89	27.51	42.33	34.93	72.07	66.55	632	608	931	753	1750	1385	2.296	1.199	0.00248171	0.0154249	up	NW_018743649.1	675763	687463	+	LOC110683259	--	--	plasma membrane-associated cation-binding protein 1-like [Chenopodium quinoa]	RecName: Full=Plasma membrane-associated cation-binding protein 1; Short=AtPCAP1; AltName: Full=Microtubule-destabilizing protein 25;	SubName: Full=Uncharacterized protein {ECO:0000313|EMBL:KNA18787.1};	--	GO:0046658,anchored component of plasma membrane; GO:0009507,chloroplast; GO:0005881,cytoplasmic microtubule; GO:0043657,host cell; GO:0005886,plasma membrane; GO:0009506,plasmodesma; GO:0005773,vacuole; GO:0005509,calcium ion binding; GO:0005516,calmodulin binding; GO:0005507,copper ion binding; GO:0008017,microtubule binding; GO:0005547,phosphatidylinositol-3,4,5-trisphosphate binding; GO:00433…	DREPP plasma membrane polypeptide
gene-LOC110683276	0.19	0.28	0.14	1.33	0.3	5.13	4	6	3	28	7	104	14.782	3.886	0.000121579	0.0013894	up	NW_018743652.1	143114	148672	-	LOC110683276	--	K08516 synaptobrevin homolog YKT6 | (RefSeq) VAMP-like protein YKT61 (A)	VAMP-like protein YKT61 [Chenopodium quinoa]	RecName: Full=VAMP-like protein YKT61; Short=AtYKT61; AltName: Full=Geranylgeranylated protein 1; Short=AtGP1; Flags: Precursor;	SubName: Full=Uncharacterized protein {ECO:0000313|EMBL:KMS96405.1};	SNARE protein YKT6, synaptobrevin/VAMP syperfamily	GO:0016021,integral component of membrane; GO:0005886,plasma membrane; GO:0031201,SNARE complex; GO:0005484,SNAP receptor activity; GO:0000149,SNARE binding; GO:0006887,exocytosis; GO:0015031,protein transport; GO:0006906,vesicle fusion	Synaptobrevin
gene-LOC110683289	3.67	3.48	9.77	12.49	16.96	13.89	90	89	249	312	477	335	3.286	1.716	0.000394819	0.00360718	up	NW_018743669.1	397397	398712	+	LOC110683289	--	K14686 solute carrier family 31 (copper transporter), member 1 | (RefSeq) copper transporter 6-like (A)	copper transporter 6-like [Chenopodium quinoa]	RecName: Full=Copper transporter 6; Short=AtCOPT6;	SubName: Full=Uncharacterized protein {ECO:0000313|EMBL:KNA10675.1};	Copper transporter	GO:0016021,integral component of membrane; GO:0005773,vacuole; GO:0005375,copper ion transmembrane transporter activity	Ctr copper transporter family
gene-LOC110683314	21.99	14.09	26.31	82.98	109.65	81.24	560	375	697	2154	3206	2036	5.663	2.501	2.62075e-13	2.31795e-11	up	NW_018743669.1	1411615	1417053	+	LOC110683314	--	K20716 mitogen-activated protein kinase kinase kinase 17/18 | (RefSeq) mitogen-activated protein kinase kinase kinase 18-like (A)	mitogen-activated protein kinase kinase kinase 18-like [Chenopodium quinoa]	RecName: Full=Mitogen-activated protein kinase kinase kinase 17 {ECO:0000303|PubMed:25720833}; EC=2.7.11.25 {ECO:0000250|UniProtKB:Q9ZVP5, ECO:0000255|PROSITE-ProRule:PRU00159};	SubName: Full=Uncharacterized protein {ECO:0000313|EMBL:KNA23213.1};	MEKK and related serine/threonine protein kinases	GO:0005737,cytoplasm; GO:0005634,nucleus; GO:0005524,ATP binding; GO:0004709,MAP kinase kinase kinase activity; GO:0004674,protein serine/threonine kinase activity; GO:0004702,NA; GO:0009738,abscisic acid-activated signaling pathway; GO:0032147,activation of protein kinase activity; GO:0007346,regulation of mitotic cell cycle; GO:0009737,response to abscisic acid; GO:0006970,response to osmotic s…	Protein kinase domain
gene-LOC110683332	0.53	0.25	0.67	0.98	2.33	2.16	22	11	29	42	112	89	4.974	2.315	9.57425e-05	0.00113884	up	NW_018743669.1	48262	51622	-	LOC110683332	--	K05909 laccase [EC:1.10.3.2] | (RefSeq) laccase-2-like (A)	laccase-2-like [Chenopodium quinoa]	RecName: Full=Laccase-17; EC=1.10.3.2; AltName: Full=Benzenediol:oxygen oxidoreductase 17; AltName: Full=Diphenol oxidase 17; AltName: Full=Urishiol oxidase 17; Flags: Precursor;	RecName: Full=Laccase {ECO:0000256|RuleBase:RU361119}; EC=1.10.3.2 {ECO:0000256|RuleBase:RU361119}; AltName: Full=Benzenediol:oxygen oxidoreductase {ECO:0000256|RuleBase:RU361119}; AltName: Full=Diphenol oxidase {ECO:0000256|RuleBase:RU361119}; AltName: Full=Urishiol oxidase {ECO:0000256|RuleBase:RU361119};	Multicopper oxidases	GO:0048046,apoplast; GO:0005507,copper ion binding; GO:0052716,hydroquinone:oxygen oxidoreductase activity; GO:0016491,oxidoreductase activity; GO:0016722,oxidoreductase activity, oxidizing metal ions; GO:0009809,lignin biosynthetic process; GO:0046274,lignin catabolic process; GO:0009698,phenylpropanoid metabolic process	Multicopper oxidase
gene-LOC110683333	0.94	0.62	1.5	2.07	2.99	2.64	36	25	60	81	132	100	3.256	1.703	0.00029341	0.00285191	up	NW_018743669.1	66582	69627	-	LOC110683333	--	K05909 laccase [EC:1.10.3.2] | (RefSeq) laccase-17-like (A)	laccase-17-like [Chenopodium quinoa]	RecName: Full=Laccase-17; EC=1.10.3.2; AltName: Full=Benzenediol:oxygen oxidoreductase 17; AltName: Full=Diphenol oxidase 17; AltName: Full=Urishiol oxidase 17; Flags: Precursor;	RecName: Full=Laccase {ECO:0000256|RuleBase:RU361119}; EC=1.10.3.2 {ECO:0000256|RuleBase:RU361119}; AltName: Full=Benzenediol:oxygen oxidoreductase {ECO:0000256|RuleBase:RU361119}; AltName: Full=Diphenol oxidase {ECO:0000256|RuleBase:RU361119}; AltName: Full=Urishiol oxidase {ECO:0000256|RuleBase:RU361119};	Multicopper oxidases	GO:0048046,apoplast; GO:0005507,copper ion binding; GO:0052716,hydroquinone:oxygen oxidoreductase activity; GO:0016491,oxidoreductase activity; GO:0016722,oxidoreductase activity, oxidizing metal ions; GO:0009809,lignin biosynthetic process; GO:0046274,lignin catabolic process; GO:0009698,phenylpropanoid metabolic process	Multicopper oxidase
gene-LOC110683344	14.05	7.48	17.3	20.43	27.78	18.53	1195	665	1530	1771	2712	1551	2.205	1.141	0.00394895	0.0218807	up	NW_018743669.1	149919	159721	+	LOC110683344	--	K01176 alpha-amylase [EC:3.2.1.1] | (RefSeq) lectin-domain containing receptor kinase VI.3-like (A)	L-type lectin-domain containing receptor kinase IV.2-like isoform X1 [Chenopodium quinoa]	RecName: Full=L-type lectin-domain containing receptor kinase IV.2 {ECO:0000303|PubMed:19773388}; Short=Arabidopsis thaliana lectin-receptor kinase a4 {ECO:0000303|PubMed:19773388}; Short=AthlecRK-a4 {ECO:0000303|Ref.6}; Short=LecRK-IV.2 {ECO:0000303|PubMed:19773388}; EC=2.7.11.1 {ECO:0000255|PROSITE-ProRule:PRU00159}; AltName: Full=Protein SMALL, GLUED-TOGETHER, AND COLLAPSED POLLEN {ECO:0000303…	SubName: Full=Uncharacterized protein {ECO:0000313|EMBL:KNA02682.1};	--	GO:0016021,integral component of membrane; GO:0005886,plasma membrane; GO:0005524,ATP binding; GO:0030246,carbohydrate binding; GO:0004674,protein serine/threonine kinase activity; GO:0042742,defense response to bacterium; GO:0009555,pollen development	Legume lectin domain
gene-LOC110683347	1.98	1.76	2.18	2.01	3.91	3.63	89	83	102	92	202	161	2.134	1.094	0.00637664	0.0315634	up	NW_018743669.1	166834	169251	+	LOC110683347	--	K01176 alpha-amylase [EC:3.2.1.1] | (RefSeq) lectin-domain containing receptor kinase VI.3-like (A)	L-type lectin-domain containing receptor kinase IV.2-like [Chenopodium quinoa]	RecName: Full=L-type lectin-domain containing receptor kinase IV.2 {ECO:0000303|PubMed:19773388}; Short=Arabidopsis thaliana lectin-receptor kinase a4 {ECO:0000303|PubMed:19773388}; Short=AthlecRK-a4 {ECO:0000303|Ref.6}; Short=LecRK-IV.2 {ECO:0000303|PubMed:19773388}; EC=2.7.11.1 {ECO:0000255|PROSITE-ProRule:PRU00159}; AltName: Full=Protein SMALL, GLUED-TOGETHER, AND COLLAPSED POLLEN {ECO:0000303…	SubName: Full=Uncharacterized protein {ECO:0000313|EMBL:KNA20183.1};	--	GO:0016021,integral component of membrane; GO:0005886,plasma membrane; GO:0005524,ATP binding; GO:0030246,carbohydrate binding; GO:0004674,protein serine/threonine kinase activity; GO:0042742,defense response to bacterium; GO:0009555,pollen development	Legume lectin domain
gene-LOC110683348	0.29	0.13	0.7	0.57	1.83	1.9	15	7	38	30	109	97	4.987	2.318	0.00237996	0.0149279	up	NW_018743669.1	193763	196546	+	LOC110683348	--	K01176 alpha-amylase [EC:3.2.1.1] | (RefSeq) lectin-domain containing receptor kinase VI.3-like (A)	L-type lectin-domain containing receptor kinase IV.1-like [Chenopodium quinoa]	RecName: Full=L-type lectin-domain containing receptor kinase IV.2 {ECO:0000303|PubMed:19773388}; Short=Arabidopsis thaliana lectin-receptor kinase a4 {ECO:0000303|PubMed:19773388}; Short=AthlecRK-a4 {ECO:0000303|Ref.6}; Short=LecRK-IV.2 {ECO:0000303|PubMed:19773388}; EC=2.7.11.1 {ECO:0000255|PROSITE-ProRule:PRU00159}; AltName: Full=Protein SMALL, GLUED-TOGETHER, AND COLLAPSED POLLEN {ECO:0000303…	SubName: Full=probable L-type lectin-domain containing receptor kinase II.1 {ECO:0000313|RefSeq:XP_018855504.1};	--	GO:0016021,integral component of membrane; GO:0005886,plasma membrane; GO:0005524,ATP binding; GO:0030246,carbohydrate binding; GO:0004674,protein serine/threonine kinase activity; GO:0042742,defense response to bacterium; GO:0009555,pollen development	Legume lectin domain
gene-LOC110683358	23.63	21.51	30.23	34.13	45.5	42.75	3434	3268	4570	5056	7593	6115	2.118	1.082	0.00013697	0.00153274	up	NW_018743669.1	216460	229660	+	LOC110683358	--	K13171 serine/arginine repetitive matrix protein 1 | (RefSeq) serine/arginine repetitive matrix protein 1-like isoform X1 (A)	serine/arginine repetitive matrix protein 1-like isoform X1 [Chenopodium quinoa]	--	SubName: Full=Uncharacterized protein {ECO:0000313|EMBL:KNA20010.1};	Splicing coactivator SRm160/300, subunit SRm160 (contains PWI domain)	GO:0006397,mRNA processing	PWI domain
gene-LOC110683403	270.99	175.42	227.9	550.24	482.29	382.89	5120	3464	4479	10597	10463	7120	2.686	1.425	5.2542e-08	1.73134e-06	up	NW_018743669.1	603617	605060	+	LOC110683403	--	K00799 glutathione S-transferase [EC:2.5.1.18] | (RefSeq) probable glutathione S-transferase (A)	probable glutathione S-transferase [Chenopodium quinoa]	RecName: Full=Probable glutathione S-transferase; EC=2.5.1.18; AltName: Full=Auxin-induced protein PCNT107;	SubName: Full=probable glutathione S-transferase parC {ECO:0000313|RefSeq:XP_010245130.1};	Glutathione S-transferase	GO:0004364,glutathione transferase activity; GO:0009734,auxin-activated signaling pathway	Glutathione S-transferase, N-terminal domain
gene-LOC110683416	1.9	2.13	2.51	2.38	4.83	4.19	75	88	103	96	219	163	2.316	1.212	0.00271004	0.0164747	up	NW_018743669.1	701656	704925	+	LOC110683416	--	K05909 laccase [EC:1.10.3.2] | (RefSeq) laccase-4-like (A)	laccase-4-like [Chenopodium quinoa]	RecName: Full=Laccase-4; EC=1.10.3.2; AltName: Full=Benzenediol:oxygen oxidoreductase 4; AltName: Full=Diphenol oxidase 4; AltName: Full=Protein IRREGULAR XYLEM 12; AltName: Full=Urishiol oxidase 4; Flags: Precursor;	RecName: Full=Laccase {ECO:0000256|RuleBase:RU361119}; EC=1.10.3.2 {ECO:0000256|RuleBase:RU361119}; AltName: Full=Benzenediol:oxygen oxidoreductase {ECO:0000256|RuleBase:RU361119}; AltName: Full=Diphenol oxidase {ECO:0000256|RuleBase:RU361119}; AltName: Full=Urishiol oxidase {ECO:0000256|RuleBase:RU361119};	Multicopper oxidases	GO:0048046,apoplast; GO:0005507,copper ion binding; GO:0052716,hydroquinone:oxygen oxidoreductase activity; GO:0016491,oxidoreductase activity; GO:0016722,oxidoreductase activity, oxidizing metal ions; GO:0009809,lignin biosynthetic process; GO:0046274,lignin catabolic process; GO:0009834,plant-type secondary cell wall biogenesis	Multicopper oxidase
gene-LOC110683422	30.65	19.98	25.83	28.87	44.42	60.82	1783	1215	1563	1712	2967	3482	2.307	1.206	0.00138041	0.0098543	up	NW_018743669.1	765434	770633	+	LOC110683422	--	K03147 phosphomethylpyrimidine synthase [EC:4.1.99.17] | (RefSeq) phosphomethylpyrimidine synthase, chloroplastic-like isoform X1 (A)	phosphomethylpyrimidine synthase, chloroplastic-like isoform X1 [Chenopodium quinoa]	RecName: Full=Phosphomethylpyrimidine synthase, chloroplastic; EC=4.1.99.17; AltName: Full=Hydroxymethylpyrimidine phosphate synthase; Short=HMP-P synthase; Short=HMP-phosphate synthase; Short=HMPP synthase; AltName: Full=Protein PYRIMIDINE REQUIRING; AltName: Full=Thiamine biosynthesis protein ThiC; Short=Protein THIAMINE C; Flags: Precursor;	SubName: Full=Uncharacterized protein {ECO:0000313|EMBL:KNA05284.1};	--	GO:0009507,chloroplast; GO:0009570,chloroplast stroma; GO:0009536,plastid; GO:0051539,4 iron, 4 sulfur cluster binding; GO:0080041,ADP-ribose pyrophosphohydrolase activity; GO:0016830,carbon-carbon lyase activity; GO:0051536,iron-sulfur cluster binding; GO:0046872,metal ion binding; GO:0019904,protein domain specific binding; GO:0010266,response to vitamin B1; GO:0009228,thiamine biosynthetic pro…	Radical SAM ThiC family
gene-LOC110683450	1.48	0.81	2.34	3.02	8.24	11.48	115	66	189	239	733	876	6.43	2.685	5.09384e-06	9.6688e-05	up	NW_018743669.1	1007804	1013341	-	LOC110683450	--	K11778 ditrans,polycis-polyprenyl diphosphate synthase [EC:2.5.1.87] | (RefSeq) LOW QUALITY PROTEIN: dehydrodolichyl diphosphate synthase 2-like (A)	LOW QUALITY PROTEIN: dehydrodolichyl diphosphate synthase 2-like [Chenopodium quinoa]	RecName: Full=Dehydrodolichyl diphosphate synthase 2; Short=Dedol-PP synthase 2; EC=2.5.1.-;	RecName: Full=Alkyl transferase {ECO:0000256|RuleBase:RU363018}; EC=2.5.1.- {ECO:0000256|RuleBase:RU363018};	Cis-prenyltransferase	GO:0009507,chloroplast; GO:0009570,chloroplast stroma; GO:0005829,cytosol; GO:0002094,polyprenyltransferase activity; GO:0009668,plastid membrane organization; GO:0016094,polyprenol biosynthetic process; GO:0006486,protein glycosylation	Putative undecaprenyl diphosphate synthase
gene-LOC110683457	0.46	0.97	0.66	1.49	1.1	1.2	29	63	43	95	79	74	2.371	1.246	0.000340949	0.00321167	up	NW_018743669.1	1052668	1057347	+	LOC110683457	--	K19517 1D-myo-inositol 3-kinase [EC:2.7.1.64] | (RefSeq) inositol 3-kinase-like (A)	inositol 3-kinase-like [Chenopodium quinoa]	RecName: Full=Inositol 3-kinase {ECO:0000305}; EC=2.7.1.64 {ECO:0000250|UniProtKB:Q5GA22}; AltName: Full=Myo-inositol kinase {ECO:0000305}; Short=AtMIK {ECO:0000303|PubMed:21698461};	SubName: Full=Uncharacterized protein {ECO:0000313|EMBL:KNA25918.1};	Ribokinase	GO:0005524,ATP binding; GO:0019140,inositol 3-kinase activity; GO:0010264,myo-inositol hexakisphosphate biosynthetic process	pfkB family carbohydrate kinase
gene-LOC110683465	209.92	129.75	150.08	186.57	241.57	327.16	5701	3683	4240	5165	7533	8745	2.021	1.015	0.00319085	0.0186655	up	NW_018743669.1	1117699	1119157	+	LOC110683465	--	K06215 pyridoxal 5'-phosphate synthase pdxS subunit [EC:4.3.3.6] | (RefSeq) probable pyridoxal 5'-phosphate synthase subunit PDX1 (A)	probable pyridoxal 5'-phosphate synthase subunit PDX1 [Chenopodium quinoa]	RecName: Full=Probable pyridoxal 5'-phosphate synthase subunit PDX1; Short=PLP synthase subunit PDX1; EC=4.3.3.6; AltName: Full=Ethylene-inducible protein HEVER;	SubName: Full=Uncharacterized protein {ECO:0000313|EMBL:KNA16621.1};	Stationary phase-induced protein, SOR/SNZ family	GO:0036381,pyridoxal 5'-phosphate synthase (glutamine hydrolysing) activity; GO:0042823,pyridoxal phosphate biosynthetic process	SOR/SNZ family
gene-LOC110683474	14.46	14	19.87	25.4	25.78	36.54	1093	1106	1563	1958	2238	2719	2.36	1.239	3.51232e-05	0.00049943	up	NW_018743669.1	1201247	1206532	+	LOC110683474	--	K03695 ATP-dependent Clp protease ATP-binding subunit ClpB | (RefSeq) chaperone protein ClpB1 (A)	protein SMAX1-LIKE 6-like [Chenopodium quinoa]	RecName: Full=Protein SMAX1-LIKE 7 {ECO:0000303|PubMed:23893171}; Short=AtSMXL7 {ECO:0000303|PubMed:23893171}; AltName: Full=Protein D53-like 1 {ECO:0000303|PubMed:24336200}; Short=AtD53-like 1 {ECO:0000303|PubMed:24336200}; AltName: Full=Protein D53-like SMXL 7 {ECO:0000303|PubMed:26546446};	SubName: Full=Uncharacterized protein {ECO:0000313|EMBL:KNA15505.1};	Chaperone HSP104 and related ATP-dependent Clp proteases	GO:0005634,nucleus; GO:0019538,protein metabolic process; GO:0006355,regulation of transcription, DNA-templated; GO:0006351,transcription, DNA-templated	AAA domain (Cdc48 subfamily)
gene-LOC110683476	0.41	0.79	0.76	2.43	3.38	5.49	12	24	23	72	113	157	7.663	2.938	4.01817e-09	1.64562e-07	up	NW_018743669.1	1211000	1213085	-	LOC110683476	--	--	--	--	--	--	--	--
gene-LOC110683478	10.41	9.59	12.84	15.47	19.68	31.08	505	486	648	765	1096	1484	2.648	1.405	9.42206e-05	0.0011245	up	NW_018743669.1	1262676	1265869	+	LOC110683478	--	K15172 transcription elongation factor SPT5 | (RefSeq) hypothetical protein (A)	zinc finger CCCH domain-containing protein 66-like [Chenopodium quinoa]	RecName: Full=Zinc finger CCCH domain-containing protein 66; Short=AtC3H66;	SubName: Full=Uncharacterized protein {ECO:0000313|EMBL:KNA08716.1};	CCCH-type Zn-finger protein	GO:0003677,DNA binding; GO:0003700,DNA-binding transcription factor activity; GO:0046872,metal ion binding; GO:0006355,regulation of transcription, DNA-templated	Ankyrin repeat
gene-LOC110683482	19.3	12.6	16.21	18.2	28.46	38.38	753	514	658	724	1275	1474	2.326	1.218	0.00142034	0.0100744	up	NW_018743669.1	1294026	1305842	-	LOC110683482	--	K17871 NADH:ubiquinone reductase (non-electrogenic) [EC:1.6.5.9] | (RefSeq) internal alternative NAD(P)H-ubiquinone oxidoreductase A1, mitochondrial-like (A)	internal alternative NAD(P)H-ubiquinone oxidoreductase A1, mitochondrial-like [Chenopodium quinoa]	RecName: Full=Internal alternative NAD(P)H-ubiquinone oxidoreductase A1, mitochondrial; EC=1.6.5.9; AltName: Full=Internal alternative NADH dehydrogenase NDA1; AltName: Full=Internal non-phosphorylating NAD(P)H dehydrogenase 1; Short=StNDI1; AltName: Full=NADH:ubiquinone reductase (non-electrogenic) NDA1; Flags: Precursor;	SubName: Full=Uncharacterized protein {ECO:0000313|EMBL:KNA22463.1};	NADH-dehydrogenase (ubiquinone)	GO:0005743,mitochondrial inner membrane; GO:0005759,mitochondrial matrix; GO:0005777,peroxisome; GO:0003959,NADPH dehydrogenase activity; GO:0055114,oxidation-reduction process	Pyridine nucleotide-disulphide oxidoreductase
gene-LOC110683504	0	0	0	0.45	0.33	0.16	0	0	0	12	10	4	58.522	5.871	0.000421198	0.00380117	up	NW_018743669.1	1549697	1552070	-	LOC110683504	--	K15095 (+)-neomenthol dehydrogenase [EC:1.1.1.208] | (RefSeq) (+)-neomenthol dehydrogenase-like (A)	(+)-neomenthol dehydrogenase-like [Chenopodium quinoa]	RecName: Full=(+)-neomenthol dehydrogenase {ECO:0000303|PubMed:18599651}; EC=1.1.1.- {ECO:0000269|PubMed:21169366}; EC=1.1.1.208 {ECO:0000269|PubMed:18599651}; AltName: Full=Menthone:neomenthol reductase; AltName: Full=Short-chain dehydrogenase/reductase 1; Short=AtSDR1;	SubName: Full=Uncharacterized protein {ECO:0000313|EMBL:KDP42906.1};	Dehydrogenases with different specificities (related to short-chain alcohol dehydrogenases)	GO:0005737,cytoplasm; GO:0047501,(+)-neomenthol dehydrogenase activity; GO:0006952,defense response	short chain dehydrogenase
gene-LOC110683514	3.16	3.37	2.82	7.15	10.43	7.67	87	97	81	201	330	208	3.569	1.835	6.9806e-10	3.37199e-08	up	NW_018743669.1	1602604	1607374	-	LOC110683514	--	K00326 cytochrome-b5 reductase [EC:1.6.2.2] | (RefSeq) NADH--cytochrome b5 reductase 1-like isoform X1 (A)	NADH--cytochrome b5 reductase 1-like isoform X1 [Chenopodium quinoa]	RecName: Full=NADH--cytochrome b5 reductase 1; EC=1.6.2.2;	RecName: Full=NADH-cytochrome b5 reductase {ECO:0000256|RuleBase:RU361226}; EC=1.6.2.2 {ECO:0000256|RuleBase:RU361226};	NADH-cytochrome b-5 reductase	GO:0005783,endoplasmic reticulum; GO:0016021,integral component of membrane; GO:0005741,mitochondrial outer membrane; GO:0009505,plant-type cell wall; GO:0005886,plasma membrane; GO:0004128,cytochrome-b5 reductase activity, acting on NAD(P)H; GO:0022900,electron transport chain	Oxidoreductase FAD-binding domain
gene-LOC110683515	40.24	34.01	51.12	61.08	81.23	83.58	815	720	1077	1261	1889	1666	2.348	1.231	5.99906e-05	0.000777012	up	NW_018743669.1	1607917	1610350	-	LOC110683515	--	K09838 zeaxanthin epoxidase [EC:1.14.15.21] | (RefSeq) zeaxanthin epoxidase, chloroplastic (A)	uncharacterized protein LOC110683515 isoform X1 [Chenopodium quinoa]	RecName: Full=Zeaxanthin epoxidase, chloroplastic; Short=AtZEP; EC=1.14.15.21; AltName: Full=Protein ABA DEFICIENT 1; Short=AtABA1; AltName: Full=Protein IMPAIRED IN BABA-INDUCED STERILITY 3; AltName: Full=Protein LOW EXPRESSION OF OSMOTIC STRESS-RESPONSIVE GENES 6; AltName: Full=Protein NON-PHOTOCHEMICAL QUENCHING 2; Flags: Precursor;	SubName: Full=Uncharacterized protein {ECO:0000313|EMBL:KNA14267.1};	--	GO:0009507,chloroplast; GO:0009941,chloroplast envelope; GO:0016020,membrane; GO:0071949,FAD binding; GO:0009540,zeaxanthin epoxidase [overall] activity; GO:0009688,abscisic acid biosynthetic process; GO:0009408,response to heat; GO:0010114,response to red light; GO:0009414,response to water deprivation; GO:0044550,secondary metabolite biosynthetic process; GO:0010182,sugar mediated signaling pat…	FHA domain
gene-LOC110683523	0.19	0.18	0.45	0.55	1.94	2.97	6	6	15	18	71	93	8.826	3.142	5.78305e-05	0.000753437	up	NW_018743669.1	1661988	1667293	-	LOC110683523	--	K16297 serine carboxypeptidase-like clade II [EC:3.4.16.-] | (RefSeq) serine carboxypeptidase II-3-like (A)	serine carboxypeptidase II-3-like [Chenopodium quinoa]	RecName: Full=Serine carboxypeptidase II-3; EC=3.4.16.6; AltName: Full=CP-MII.3; Contains: RecName: Full=Serine carboxypeptidase II-3 chain A; Contains: RecName: Full=Serine carboxypeptidase II-3 chain B; Flags: Precursor;	RecName: Full=Carboxypeptidase {ECO:0000256|RuleBase:RU361156}; EC=3.4.16.- {ECO:0000256|RuleBase:RU361156}; Flags: Fragment;	Serine carboxypeptidases (lysosomal cathepsin A)	GO:0004185,serine-type carboxypeptidase activity	Serine carboxypeptidase
gene-LOC110683531	20.59	19.34	26.88	27.93	33.51	52.54	327	321	444	452	611	821	2.234	1.159	0.0011712	0.00863388	up	NW_018743669.1	1751178	1752547	-	LOC110683531	--	K08864 tousled-like kinase [EC:2.7.11.1] | (RefSeq) serine/threonine-protein kinase TOUSLED-like isoform X1 (A)	uncharacterized protein LOC110683531 [Chenopodium quinoa]	--	SubName: Full=Uncharacterized protein {ECO:0000313|EMBL:KNA06460.1};	Tousled-like protein kinase	--	Protein of unknown function (DUF3148)
gene-LOC110683564	1.8	1.49	1.71	2.7	5.98	7.7	74	64	73	113	282	311	4.364	2.126	5.46541e-06	0.000102553	up	NW_018743669.1	2162193	2164609	-	LOC110683564	--	--	protein FAF-like, chloroplastic [Chenopodium quinoa]	RecName: Full=Protein FAF-like, chloroplastic; Flags: Precursor;	SubName: Full=Uncharacterized protein {ECO:0000313|EMBL:KNA23389.1};	--	GO:0009507,chloroplast	Fantastic Four meristem regulator
gene-LOC110683568	25.52	20.12	22.28	40.17	35.41	36.82	1432	1180	1300	2297	2281	2033	2.137	1.096	2.91816e-08	1.01151e-06	up	NW_018743669.1	2239688	2244093	-	LOC110683568	--	--	BEL1-like homeodomain protein 1 [Chenopodium quinoa]	RecName: Full=BEL1-like homeodomain protein 1; Short=BEL1-like protein 1; AltName: Full=Protein EMBRYO SAC DEVELOPMENT ARREST 29;	SubName: Full=Uncharacterized protein {ECO:0000313|EMBL:KNA25228.1};	Transcription factor MEIS1 and related HOX domain proteins	GO:0005737,cytoplasm; GO:0005634,nucleus; GO:0003677,DNA binding; GO:0003700,DNA-binding transcription factor activity; GO:0046982,protein heterodimerization activity; GO:0042803,protein homodimerization activity; GO:0010197,polar nucleus fusion; GO:0009737,response to abscisic acid; GO:0010201,response to continuous far red light stimulus by the high-irradiance response system; GO:0009610,respon…	Associated with HOX
gene-LOC110683572	2.47	1.25	2.84	4.78	4.12	2.86	102	54	122	201	195	116	2.262	1.178	0.00481577	0.0254522	up	NW_018743669.1	2286010	2289257	+	LOC110683572	--	K03695 ATP-dependent Clp protease ATP-binding subunit ClpB | (RefSeq) chaperone protein ClpB1-like (A)	aluminum-activated malate transporter 2-like [Chenopodium quinoa]	RecName: Full=Aluminum-activated malate transporter 2; Short=AtALMT2;	SubName: Full=Uncharacterized protein {ECO:0000313|EMBL:KNA25976.1};	Predicted membrane protein	GO:0016021,integral component of membrane; GO:0009705,plant-type vacuole membrane; GO:0015140,malate transmembrane transporter activity	Aluminium activated malate transporter
gene-LOC110683589	2.66	1.94	2.67	3.27	6.27	8.1	142	108	148	178	384	425	3.209	1.682	0.000107746	0.00125841	up	NW_018743669.1	2558026	2562586	-	LOC110683589	--	--	--	--	--	--	--	--
gene-LOC110683597	519.41	436.7	699.79	878.34	1128.54	1180.42	7348	6457	10298	12666	18332	16436	2.502	1.323	1.99216e-05	0.00031081	up	NW_018743669.1	2625038	2627034	-	LOC110683597	--	K14332 photosystem I subunit PsaO | (RefSeq) photosystem I subunit O-like (A)	photosystem I subunit O-like [Chenopodium quinoa]	RecName: Full=Photosystem I subunit O; Short=PSI-O; Flags: Precursor;	SubName: Full=Uncharacterized protein {ECO:0000313|EMBL:KNA13155.1};	--	GO:0009507,chloroplast; GO:0009535,chloroplast thylakoid membrane; GO:0016021,integral component of membrane; GO:0009522,photosystem I; GO:0009579,thylakoid; GO:0009768,photosynthesis, light harvesting in photosystem I; GO:0009767,photosynthetic electron transport chain	--
gene-LOC110683600	1.47	2.51	1.32	4.95	4.01	4.12	46	82	43	158	144	127	3.244	1.698	1.26171e-08	4.66525e-07	up	NW_018743669.1	2684207	2688615	-	LOC110683600	--	K12611 mRNA-decapping enzyme 1B [EC:3.-.-.-] | (RefSeq) mRNA-decapping enzyme-like protein (A)	mRNA-decapping enzyme-like protein [Chenopodium quinoa]	RecName: Full=mRNA-decapping enzyme-like protein; EC=3.-.-.-; AltName: Full=DCP1 homolog;	SubName: Full=Uncharacterized protein {ECO:0000313|EMBL:KNA13152.1};	Decapping enzyme complex component DCP1	GO:0005737,cytoplasm; GO:0000932,P-body; GO:0008047,enzyme activator activity; GO:0030234,enzyme regulator activity; GO:0016787,hydrolase activity; GO:0003729,mRNA binding; GO:0000290,deadenylation-dependent decapping of nuclear-transcribed mRNA; GO:0031087,deadenylation-independent decapping of nuclear-transcribed mRNA; GO:0006952,defense response; GO:0006397,mRNA processing	Dcp1-like decapping family
gene-LOC110683604	0.28	0.13	0.32	0.22	0.79	2.38	10	5	12	8	33	85	6.21	2.635	0.00406095	0.0223486	up	NW_018743669.1	2723276	2726396	+	LOC110683604	--	K00521 ferric-chelate reductase [EC:1.16.1.7] | (RefSeq) ferric reduction oxidase 7, chloroplastic-like (A)	NAC domain-containing protein 90-like [Chenopodium quinoa]	RecName: Full=NAC domain-containing protein 90; Short=ANAC090;	SubName: Full=Uncharacterized protein {ECO:0000313|EMBL:OAY38223.1};	--	GO:0005634,nucleus; GO:0003677,DNA binding; GO:0003700,DNA-binding transcription factor activity; GO:0006351,transcription, DNA-templated	No apical meristem (NAM) protein
gene-LOC110683690	0	0	0	0.85	0.64	1.12	0	0	0	37	31	47	269.453	8.074	7.96546e-10	3.8135e-08	up	NW_018743691.1	4351536	4353819	-	LOC110683690	--	K01322 prolyl oligopeptidase [EC:3.4.21.26] | (RefSeq) putative F-box/LRR-repeat protein At3g18150 (A)	F-box/FBD/LRR-repeat protein At5g22660-like [Chenopodium quinoa]	RecName: Full=F-box/FBD/LRR-repeat protein At5g22660;	SubName: Full=Uncharacterized protein {ECO:0000313|EMBL:KNA11711.1};	--	--	FBD
gene-LOC110683701	0.9	1.05	0.62	1.93	2.49	2.02	32	39	23	70	102	71	3.328	1.735	2.63933e-06	5.46699e-05	up	NW_018743691.1	484985	492359	+	LOC110683701	--	K14638 solute carrier family 15 (peptide/histidine transporter), member 3/4 | (RefSeq) protein NRT1/ PTR FAMILY 2.3-like (A)	protein NRT1/ PTR FAMILY 2.3-like [Chenopodium quinoa]	RecName: Full=Protein NRT1/ PTR FAMILY 2.3; Short=AtNPF2.3; AltName: Full=Probable nitrate excretion transporter 3; AltName: Full=Protein NAXT1-like 2;	SubName: Full=Uncharacterized protein {ECO:0000313|EMBL:KMS95534.1};	H+/oligopeptide symporter	GO:0016021,integral component of membrane; GO:0005886,plasma membrane; GO:0015112,nitrate transmembrane transporter activity; GO:0071472,cellular response to salt stress; GO:0042128,nitrate assimilation; GO:0015706,nitrate transport; GO:0006857,oligopeptide transport; GO:0009624,response to nematode	POT family
gene-LOC110683702	0	0	0.13	0.28	0.71	0.45	0	0	5	11	31	17	14.678	3.876	0.00206106	0.0133963	up	NW_018743691.1	562221	567564	+	LOC110683702	--	K14638 solute carrier family 15 (peptide/histidine transporter), member 3/4 | (RefSeq) protein NRT1/ PTR FAMILY 2.3-like (A)	protein NRT1/ PTR FAMILY 2.3-like [Chenopodium quinoa]	RecName: Full=Protein NRT1/ PTR FAMILY 2.6; Short=AtNPF2.6; AltName: Full=Probable nitrate excretion transporter 2; AltName: Full=Protein NAXT1-like 1;	SubName: Full=Uncharacterized protein {ECO:0000313|EMBL:KMS95534.1};	H+/oligopeptide symporter	GO:0016021,integral component of membrane; GO:0022857,transmembrane transporter activity; GO:0042128,nitrate assimilation	POT family
gene-LOC110683709	0	0	0	0.44	0.27	0.21	0	0	0	13	9	6	63.505	5.989	0.000178966	0.00190429	up	NW_018742263.1	1877142	1879104	+	LOC110683709	--	--	--	--	--	--	--	--
gene-LOC110683713	0	0	0	0.42	0.16	0.98	0	0	0	7	3	16	62.716	5.971	0.00079625	0.00635617	up	NW_018743691.1	1323916	1329423	-	LOC110683713	--	K13201 nucleolysin TIA-1/TIAR | (RefSeq) oligouridylate-binding protein 1-like isoform X1 (A)	uncharacterized protein LOC110683713 [Chenopodium quinoa]	--	SubName: Full=Uncharacterized protein {ECO:0000313|EMBL:KNA26131.1};	--	GO:0016021,integral component of membrane	GRF zinc finger
gene-LOC110683727	0.62	0.69	0.78	2.05	1.35	1.2	35	41	46	119	88	67	2.825	1.498	7.19631e-06	0.000130545	up	NW_018743691.1	1751654	1766647	-	LOC110683727	--	--	--	--	--	--	--	--
gene-LOC110683752	6.15	4.89	6.03	8.45	10.38	10.69	320	266	326	448	620	547	2.257	1.174	1.66138e-05	0.000265581	up	NW_018743691.1	2597500	2607232	-	LOC110683752	--	K05677 ATP-binding cassette, subfamily D (ALD), member 3 | (RefSeq) ATP-binding cassette, sub-family D, member 3 (A)	ABC transporter D family member 2, chloroplastic-like [Chenopodium quinoa]	RecName: Full=ABC transporter D family member 2, chloroplastic; Short=ABC transporter ABCD.2; Short=AtABCD2; EC=3.6.3.-; Flags: Precursor;	SubName: Full=Uncharacterized protein {ECO:0000313|EMBL:KNA06457.1};	Long-chain acyl-CoA transporter, ABC superfamily (involved in peroxisome organization and biogenesis)	GO:0009507,chloroplast; GO:0016021,integral component of membrane; GO:0005524,ATP binding; GO:0042626,ATPase activity, coupled to transmembrane movement of substances	ABC transporter transmembrane region 2
gene-LOC110683817	0.51	0.61	0.49	3.31	1.28	1.22	31	39	31	205	89	73	4.53	2.179	7.60633e-07	1.83595e-05	up	NW_018743691.1	4033137	4037206	-	LOC110683817	--	--	--	--	--	--	--	--
gene-LOC110683818	0	0.15	0	1.26	1.07	0.82	0	6	0	48	46	30	27.354	4.774	3.77091e-07	9.9456e-06	up	NW_018743691.1	4039827	4041835	-	LOC110683818	--	--	F-box/FBD/LRR-repeat protein At1g16930-like [Chenopodium quinoa]	RecName: Full=F-box/FBD/LRR-repeat protein At1g16930;	SubName: Full=Uncharacterized protein {ECO:0000313|EMBL:KNA11711.1};	--	--	FBD
gene-LOC110683827	0	0	0	1.16	0.93	2.39	0	0	0	33	30	66	307.679	8.265	1.24747e-09	5.70415e-08	up	NW_018743691.1	4344280	4346089	-	LOC110683827	--	--	putative FBD-associated F-box protein At1g78730 [Chenopodium quinoa]	RecName: Full=Putative FBD-associated F-box protein At1g78730;	SubName: Full=Uncharacterized protein {ECO:0000313|EMBL:KNA11712.1};	--	--	--
gene-LOC110683880	0.03	0.12	0.12	0.37	0.65	0.38	1	4	4	12	24	12	6.858	2.778	0.00137046	0.0097963	up	NW_018742263.1	4989683	5013369	+	LOC110683880	--	K00815 tyrosine aminotransferase [EC:2.6.1.5] | (RefSeq) tyrosine aminotransferase-like (A)	tyrosine aminotransferase-like [Chenopodium quinoa]	RecName: Full=Tyrosine aminotransferase; Short=TAT; EC=2.6.1.5; AltName: Full=L-tyrosine:2-oxoglutarate aminotransferase;	SubName: Full=Uncharacterized protein {ECO:0000313|EMBL:KNA13249.1};	Tyrosine aminotransferase	GO:0005829,cytosol; GO:0080130,L-phenylalanine:2-oxoglutarate aminotransferase activity; GO:0004838,L-tyrosine:2-oxoglutarate aminotransferase activity; GO:0030170,pyridoxal phosphate binding; GO:0009058,biosynthetic process; GO:0006520,cellular amino acid metabolic process; GO:0006559,L-phenylalanine catabolic process; GO:0006572,tyrosine catabolic process	Aminotransferase class I and II
gene-LOC110683899	0.09	0.09	0.26	1.35	1.77	1.88	3	3	9	46	68	62	14.971	3.904	3.75459e-10	1.90398e-08	up	NW_018742263.1	5202400	5204197	-	LOC110683899	--	K03452 magnesium/proton exchanger | (RefSeq) pentatricopeptide repeat-containing protein At3g62890-like (A)	pentatricopeptide repeat-containing protein At2g42920, chloroplastic-like [Chenopodium quinoa]	RecName: Full=Pentatricopeptide repeat-containing protein At2g42920, chloroplastic; Flags: Precursor;	SubName: Full=Uncharacterized protein {ECO:0000313|EMBL:KNA13251.1};	FOG: PPR repeat	GO:0009507,chloroplast; GO:0043231,intracellular membrane-bounded organelle; GO:0004519,endonuclease activity; GO:0003723,RNA binding; GO:0009451,RNA modification	PPR repeat
gene-LOC110683910	0.41	0.46	0.13	1.39	1.38	1.12	12	14	4	41	46	32	5.099	2.35	2.00051e-05	0.000311725	up	NW_018743691.1	4069836	4071395	+	LOC110683910	--	--	FBD-associated F-box protein At2g26860-like [Chenopodium quinoa]	RecName: Full=FBD-associated F-box protein At2g26860;	SubName: Full=Uncharacterized protein {ECO:0000313|EMBL:KMS95810.1};	--	--	FBD
gene-LOC110683938	0	0	0.04	0.11	0.83	1.75	0	0	2	5	42	76	81.731	6.353	1.63794e-05	0.000262502	up	NW_018743693.1	7576	19927	-	LOC110683938	--	--	--	--	--	--	--	--
gene-LOC110684039	1.12	4.1	1.35	7.7	9.93	9.83	59	226	74	414	601	510	5.715	2.515	6.51759e-08	2.09839e-06	up	NW_018743697.1	922058	924889	-	LOC110684039	--	K14494 DELLA protein | (RefSeq) DELLA protein GAI-like (A)	scarecrow-like protein 30 [Chenopodium quinoa]	RecName: Full=Scarecrow-like protein 33; Short=AtSCL33; AltName: Full=GRAS family protein 12; Short=AtGRAS-12;	SubName: Full=Uncharacterized protein {ECO:0000313|EMBL:KNA03676.1}; Flags: Fragment;	--	GO:0005634,nucleus; GO:0003700,DNA-binding transcription factor activity; GO:0043565,sequence-specific DNA binding; GO:0006355,regulation of transcription, DNA-templated; GO:0006351,transcription, DNA-templated	GRAS domain family
gene-LOC110684044	8.78	9.39	9.22	12.47	37.58	7.42	346	387	378	501	1701	288	2.808	1.489	0.00798348	0.0375955	up	NW_018742263.1	6717705	6721091	+	LOC110684044	--	K09510 DnaJ homolog subfamily B member 4 | (RefSeq) dnaJ homolog subfamily B member 1-like (A)	dnaJ homolog subfamily B member 1-like [Chenopodium quinoa]	RecName: Full=DnaJ protein homolog 1; Short=DNAJ-1; Flags: Precursor; Fragment;	SubName: Full=Uncharacterized protein {ECO:0000313|EMBL:KNA07891.1};	Molecular chaperone (DnaJ superfamily)	GO:0016020,membrane; GO:0031072,heat shock protein binding; GO:0046872,metal ion binding; GO:0051082,unfolded protein binding; GO:0006457,protein folding	DnaJ C terminal domain
gene-LOC110684056	0.11	0.35	0.24	0.32	0.91	0.79	8	27	18	24	77	57	3.962	1.986	0.00197514	0.0129876	up	NW_018743697.1	1134159	1139551	-	LOC110684056	--	K17710 pentatricopeptide repeat domain-containing protein 1 | (RefSeq) pentatricopeptide repeat-containing protein At2g18940, chloroplastic (A)	pentatricopeptide repeat-containing protein At1g07590, mitochondrial-like [Chenopodium quinoa]	RecName: Full=Pentatricopeptide repeat-containing protein At1g07590, mitochondrial; Flags: Precursor;	SubName: Full=Uncharacterized protein {ECO:0000313|EMBL:KNA06965.1};	FOG: PPR repeat	GO:0043231,intracellular membrane-bounded organelle; GO:0005739,mitochondrion; GO:0004519,endonuclease activity; GO:0003723,RNA binding; GO:0046686,response to cadmium ion; GO:0009451,RNA modification	PPR repeat family
gene-LOC110684071	31.98	25.67	23.63	36.43	39.94	49.22	1205	1011	926	1399	1728	1825	2.025	1.018	7.6446e-05	0.000948414	up	NW_018743697.1	1262853	1266309	-	LOC110684071	--	K19044 E3 ubiquitin-protein ligase XBAT32/33 [EC:2.3.2.27] | (RefSeq) E3 ubiquitin-protein ligase XB3 (A)	putative E3 ubiquitin-protein ligase XBAT31 [Chenopodium quinoa]	RecName: Full=Putative E3 ubiquitin-protein ligase XBAT31; EC=2.3.2.27; AltName: Full=Ankyrin repeat domain and RING finger-containing protein XBAT31; AltName: Full=Protein XB3 homolog 1; AltName: Full=RING-type E3 ubiquitin transferase XB31;	SubName: Full=Uncharacterized protein {ECO:0000313|EMBL:KNA05302.1};	--	GO:0046872,metal ion binding; GO:0016740,transferase activity; GO:0016567,protein ubiquitination	Ankyrin repeats (many copies)
gene-LOC110684079	2.77	2.39	2.32	3.82	4.19	4.17	131	118	114	184	227	194	2.127	1.089	1.51501e-05	0.000245876	up	NW_018743697.1	1341364	1344203	-	LOC110684079	--	K20043 clathrin coat assembly protein AP180 | (RefSeq) putative clathrin assembly protein At5g35200 (A)	dof zinc finger protein DOF5.1-like [Chenopodium quinoa]	RecName: Full=Dof zinc finger protein DOF3.6; Short=AtDOF3.6; AltName: Full=OBF-binding protein 3;	SubName: Full=Uncharacterized protein {ECO:0000313|EMBL:KNA11939.1};	--	GO:0005634,nucleus; GO:0003677,DNA binding; GO:0046872,metal ion binding; GO:0006355,regulation of transcription, DNA-templated; GO:0006351,transcription, DNA-templated	Dof domain, zinc finger
gene-LOC110684095	6.52	5.49	7.55	11.6	34.24	24.36	289	254	348	524	1742	1062	4.779	2.257	5.39852e-07	1.36605e-05	up	NW_018743697.1	1485772	1493394	+	LOC110684095	--	--	ACT domain-containing protein ACR9-like [Chenopodium quinoa]	RecName: Full=ACT domain-containing protein ACR9 {ECO:0000305}; AltName: Full=Protein ACT DOMAIN REPEATS 9 {ECO:0000303|PubMed:21861936};	SubName: Full=Uncharacterized protein {ECO:0000313|EMBL:KNA21710.1};	--	--	ACT domain
gene-LOC110684112	59.09	43.06	67.47	101.79	99.1	120.25	1267	965	1505	2225	2440	2538	2.442	1.288	5.81828e-06	0.000108418	up	NW_018743697.1	1671130	1672281	-	LOC110684112	--	K14841 ribosome biogenesis protein NSA1 | (RefSeq) WD repeat-containing protein DDB_G0290555 (A)	zinc finger protein ZAT12-like [Chenopodium quinoa]	RecName: Full=Zinc finger protein ZAT8;	SubName: Full=Uncharacterized protein {ECO:0000313|EMBL:KNA11901.1};	FOG: Zn-finger	GO:0005634,nucleus; GO:0003700,DNA-binding transcription factor activity; GO:0046872,metal ion binding; GO:0003676,nucleic acid binding; GO:0006355,regulation of transcription, DNA-templated; GO:0010200,response to chitin; GO:0006351,transcription, DNA-templated	C2H2-type zinc finger
gene-LOC110684119	13.82	6.96	4.51	10.82	12.84	48.56	268	141	91	214	286	927	3.814	1.931	0.00312941	0.0183947	up	NW_018743697.1	1743397	1744800	-	LOC110684119	--	K09873 aquaporin TIP | (RefSeq) aquaporin TIP1-3-like (A)	aquaporin TIP1-3-like [Chenopodium quinoa]	RecName: Full=Aquaporin TIP1-3; AltName: Full=Gamma-tonoplast intrinsic protein 3; Short=Gamma-TIP3; AltName: Full=Tonoplast intrinsic protein 1-3; Short=AtTIP1;3;	SubName: Full=Uncharacterized protein {ECO:0000313|EMBL:KNA13069.1};	Aquaporin (major intrinsic protein family)	GO:0042807,central vacuole; GO:0005887,integral component of plasma membrane; GO:0009705,plant-type vacuole membrane; GO:0015204,urea transmembrane transporter activity; GO:0015250,water channel activity; GO:0034220,ion transmembrane transport; GO:0015840,urea transport; GO:0006833,water transport	Major intrinsic protein
gene-LOC110684122	2.45	2.47	4.82	4.97	11.92	9.88	91	96	186	188	508	361	3.618	1.855	0.000137964	0.00154113	up	NW_018743697.1	1778719	1781754	-	LOC110684122	--	K14652 3,4-dihydroxy 2-butanone 4-phosphate synthase / GTP cyclohydrolase II [EC:4.1.99.12 3.5.4.25] | (RefSeq) monofunctional riboflavin biosynthesis protein RIBA 3, chloroplastic-like isoform X1 (A)	monofunctional riboflavin biosynthesis protein RIBA 3, chloroplastic-like isoform X1 [Chenopodium quinoa]	RecName: Full=Monofunctional riboflavin biosynthesis protein RIBA 3, chloroplastic; Includes: RecName: Full=Inactive 3,4-dihydroxy-2-butanone 4-phosphate synthase; Short=DHBP synthase; Includes: RecName: Full=GTP cyclohydrolase-2; EC=3.5.4.25; AltName: Full=GTP cyclohydrolase II; Flags: Precursor;	SubName: Full=Uncharacterized protein {ECO:0000313|EMBL:KNA17775.1};	Bifunctional GTP cyclohydrolase II/3,4-dihydroxy-2butanone-4-phosphate synthase	GO:0009507,chloroplast; GO:0008686,3,4-dihydroxy-2-butanone-4-phosphate synthase activity; GO:0005525,GTP binding; GO:0003935,GTP cyclohydrolase II activity; GO:0046872,metal ion binding; GO:0009231,riboflavin biosynthetic process	GTP cyclohydrolase II
gene-LOC110684135	10.15	3.96	11.18	15.47	14.13	31.99	179	73	205	278	286	555	3.127	1.645	0.00171509	0.0116522	up	NW_018743697.1	1849851	1850797	-	LOC110684135	--	--	uncharacterized protein LOC110684135 [Chenopodium quinoa]	--	SubName: Full=Uncharacterized protein {ECO:0000313|EMBL:KNA22240.1};	--	--	--
gene-LOC110684154	28.13	29.38	35.16	32.69	99.13	67.75	1376	1502	1789	1630	5568	3262	2.882	1.527	0.000482205	0.00423015	up	NW_018743697.1	2120595	2123222	-	LOC110684154	--	K07195 exocyst complex component 7 | (RefSeq) exocyst complex component EXO70B1 (A)	exocyst complex component EXO70B1-like [Chenopodium quinoa]	RecName: Full=Exocyst complex component EXO70B1 {ECO:0000303|PubMed:23944713}; Short=AtExo70b1 {ECO:0000303|PubMed:23944713}; AltName: Full=Exocyst subunit Exo70 family protein B1 {ECO:0000303|PubMed:23944713};	SubName: Full=Uncharacterized protein {ECO:0000313|EMBL:KNA10568.1};	Exocyst component protein and related proteins	GO:0005829,cytosol; GO:0012505,endomembrane system; GO:0000145,exocyst; GO:0070062,extracellular exosome; GO:0045335,phagocytic vesicle; GO:0005886,plasma membrane; GO:0042742,defense response to bacterium; GO:0050832,defense response to fungus; GO:0006887,exocytosis; GO:0009789,positive regulation of abscisic acid-activated signaling pathway; GO:0090333,regulation of stomatal closure; GO:0009414…	Exo70 exocyst complex subunit
gene-LOC110684162	23.71	12.85	25.85	32.5	84.21	80.24	798	452	905	1115	3254	2658	4.154	2.054	1.919e-05	0.00030089	up	NW_018743697.1	2192954	2197566	+	LOC110684162	--	--	shewanella-like protein phosphatase 1 isoform X1 [Chenopodium quinoa]	RecName: Full=Shewanella-like protein phosphatase 1 {ECO:0000303|PubMed:21976480}; Short=AtSLP1 {ECO:0000303|PubMed:21976480}; EC=3.1.-.- {ECO:0000305}; Flags: Precursor;	SubName: Full=Uncharacterized protein {ECO:0000313|EMBL:KNA08919.1};	Serine/threonine specific protein phosphatase PP1, catalytic subunit	GO:0009507,chloroplast; GO:0030145,manganese ion binding; GO:0016791,phosphatase activity; GO:0004721,phosphoprotein phosphatase activity	Calcineurin-like phosphoesterase
gene-LOC110684197	0.14	0.22	0.13	0.27	0.65	1.61	3	5	3	6	16	34	6.913	2.789	0.00315479	0.0185035	up	NW_018743697.1	2437865	2440076	-	LOC110684197	--	K00799 glutathione S-transferase [EC:2.5.1.18] | (RefSeq) protein IN2-1 homolog B-like (A)	protein IN2-1 homolog B-like [Chenopodium quinoa]	RecName: Full=Protein IN2-1 homolog B; AltName: Full=Glutathione S-transferase GSTZ5;	SubName: Full=Uncharacterized protein {ECO:0000313|EMBL:KNA08771.1};	Glutathione S-transferase	GO:0005737,cytoplasm; GO:0004364,glutathione transferase activity; GO:0006749,glutathione metabolic process; GO:0010731,protein glutathionylation	Glutathione S-transferase, N-terminal domain
gene-LOC110684268	6.71	6.27	6.08	6.17	12.02	14.45	175	171	165	164	360	371	2.283	1.191	0.00285487	0.0171229	up	NW_018743697.1	3143542	3146233	-	LOC110684268	--	K00430 peroxidase [EC:1.11.1.7] | (RefSeq) peroxidase P7-like (A)	peroxidase P7-like [Chenopodium quinoa]	RecName: Full=Peroxidase 4 {ECO:0000250|UniProtKB:Q42578}; EC=1.11.1.7; Flags: Precursor;	RecName: Full=Peroxidase {ECO:0000256|RuleBase:RU362060, ECO:0000256|SAAS:SAAS00709852}; EC=1.11.1.7 {ECO:0000256|RuleBase:RU362060, ECO:0000256|SAAS:SAAS00709852};	--	GO:0005576,extracellular region; GO:0020037,heme binding; GO:0046872,metal ion binding; GO:0004601,peroxidase activity; GO:0042744,hydrogen peroxide catabolic process; GO:0006979,response to oxidative stress	Peroxidase
gene-LOC110684285	0	0	0	0.89	0.48	0.72	0	0	0	18	11	14	99.137	6.631	5.41488e-06	0.000101804	up	NW_018742271.1	559588	561172	+	LOC110684285	--	K14510 serine/threonine-protein kinase CTR1 [EC:2.7.11.1] | (RefSeq) serine/threonine-protein kinase CTR1-like (A)	mitogen-activated protein kinase kinase kinase 12-like [Chenopodium quinoa]	RecName: Full=Serine/threonine-protein kinase STY46 {ECO:0000305}; EC=2.7.11.1 {ECO:0000269|PubMed:17090544}; AltName: Full=Serine/threonine/tyrosine-protein kinase 46 {ECO:0000303|PubMed:16429265};	SubName: Full=Uncharacterized protein {ECO:0000313|EMBL:KNA25892.1};	Tyrosine kinase specific for activated (GTP-bound) p21cdc42Hs	GO:0005829,cytosol; GO:0005524,ATP binding; GO:0004674,protein serine/threonine kinase activity; GO:0004712,protein serine/threonine/tyrosine kinase activity; GO:0004871,NA; GO:0009658,chloroplast organization; GO:0035556,intracellular signal transduction	Protein tyrosine kinase
gene-LOC110684289	1.54	0.54	0.98	1.6	2.08	3.6	71	26	47	75	110	163	3.093	1.629	0.00289428	0.0172959	up	NW_018743697.1	3412545	3416777	-	LOC110684289	--	K03884 NADH-ubiquinone oxidoreductase chain 6 [EC:7.1.1.2] | (RefSeq) uncharacterized protein LOC109243048 (A)	neutral/alkaline invertase 3, chloroplastic-like [Chenopodium quinoa]	RecName: Full=Alkaline/neutral invertase E, chloroplastic {ECO:0000305}; Short=A/N-INVE {ECO:0000303|PubMed:21441406}; EC=3.2.1.26 {ECO:0000269|PubMed:20304912}; Flags: Precursor;	SubName: Full=Uncharacterized protein {ECO:0000313|EMBL:KNA14070.1};	--	GO:0009507,chloroplast; GO:0033926,glycopeptide alpha-N-acetylgalactosaminidase activity; GO:0004575,sucrose alpha-glucosidase activity; GO:0048825,cotyledon development; GO:0005982,starch metabolic process; GO:0005987,sucrose catabolic process	Alkaline and neutral invertase
gene-LOC110684312	419.35	413.91	610.03	669.18	896.28	994.95	5027	5186	7607	8177	12337	11739	2.318	1.213	0.000117576	0.00135268	up	NW_018743697.1	3587082	3588150	+	LOC110684312	--	K02698 photosystem I subunit X | (RefSeq) photosystem I reaction center subunit psaK, chloroplastic-like (A)	photosystem I reaction center subunit psaK, chloroplastic-like [Chenopodium quinoa]	RecName: Full=Photosystem I reaction center subunit psaK, chloroplastic; AltName: Full=PSI-K; AltName: Full=Photosystem I subunit X; Flags: Precursor;	SubName: Full=Uncharacterized protein {ECO:0000313|EMBL:KNA10668.1};	--	GO:0009507,chloroplast; GO:0009534,chloroplast thylakoid; GO:0009535,chloroplast thylakoid membrane; GO:0016021,integral component of membrane; GO:0009522,photosystem I; GO:0009579,thylakoid; GO:0016168,chlorophyll binding; GO:0015979,photosynthesis	Photosystem I psaG / psaK
gene-LOC110684317	62.64	29.17	48.95	46.85	86.5	101.05	871	424	708	664	1381	1383	2.183	1.126	0.0108922	0.047428	up	NW_018742271.1	79619	83752	-	LOC110684317	--	--	uncharacterized protein LOC110684317 [Chenopodium quinoa]	--	SubName: Full=Uncharacterized protein {ECO:0000313|EMBL:KNA04540.1};	--	--	--
gene-LOC110684334	0.51	0.36	0.35	0.54	0.9	0.99	24	18	17	26	49	46	2.643	1.402	0.00607838	0.0304509	up	NW_018742271.1	105777	111037	+	LOC110684334	--	K01188 beta-glucosidase [EC:3.2.1.21] | (RefSeq) putative beta-glucosidase 41 isoform X1 (A)	putative beta-glucosidase 41 isoform X1 [Chenopodium quinoa]	RecName: Full=Putative beta-glucosidase 41; Short=AtBGLU41; EC=3.2.1.21; Flags: Precursor;	SubName: Full=Uncharacterized protein {ECO:0000313|EMBL:KNA16846.1};	Beta-glucosidase, lactase phlorizinhydrolase, and related proteins	GO:0009505,plant-type cell wall; GO:0008422,beta-glucosidase activity; GO:0102483,scopolin beta-glucosidase activity; GO:0005975,carbohydrate metabolic process; GO:1901657,glycosyl compound metabolic process	Glycosyl hydrolase family 1
gene-LOC110684335	1.2	1.69	1.75	2.4	2.08	2.89	21	31	32	43	42	50	2.072	1.051	0.00961217	0.0432284	up	NW_018743697.1	3808917	3809859	+	LOC110684335	--	--	cell wall / vacuolar inhibitor of fructosidase 1-like [Chenopodium quinoa]	RecName: Full=Cell wall / vacuolar inhibitor of fructosidase 1; Short=AtC/VIF1; Flags: Precursor;	SubName: Full=Uncharacterized protein {ECO:0000313|EMBL:KNA18310.1};	--	GO:0005618,cell wall; GO:0005773,vacuole; GO:0004857,enzyme inhibitor activity; GO:0043086,negative regulation of catalytic activity	Plant invertase/pectin methylesterase inhibitor
gene-LOC110684383	11.34	12.65	12.22	22.78	20.51	20.71	380	443	426	778	789	683	2.298	1.2	1.85197e-14	1.99938e-12	up	NW_018743697.1	4415943	4418453	-	LOC110684383	--	K00924 kinase [EC:2.7.1.-] | (RefSeq) probable receptor-like protein kinase At3g55450 (A)	probable serine/threonine-protein kinase PBL12 [Chenopodium quinoa]	RecName: Full=Serine/threonine-protein kinase RIPK {ECO:0000305}; EC=2.7.11.1 {ECO:0000305|PubMed:21320696}; AltName: Full=ACIK1A/PBL14; AltName: Full=ACRE protein ortholog 264A {ECO:0000305}; Short=AtACRE264a {ECO:0000303|PubMed:15181213}; AltName: Full=PBS1-like protein 14 {ECO:0000303|PubMed:20413097}; AltName: Full=RPM1-induced protein kinase {ECO:0000303|PubMed:21320696};	SubName: Full=Uncharacterized protein {ECO:0000313|EMBL:KNA26124.1};	Serine/threonine protein kinase	GO:0005886,plasma membrane; GO:0005524,ATP binding; GO:0004674,protein serine/threonine kinase activity; GO:0004675,transmembrane receptor protein serine/threonine kinase activity; GO:0007166,cell surface receptor signaling pathway; GO:0042742,defense response to bacterium; GO:0006468,protein phosphorylation	Protein kinase domain
gene-LOC110684387	0.42	0.45	0.33	0.3	3.39	2.04	26	29	21	19	240	124	6.596	2.722	0.000373779	0.00344334	up	NW_018743697.1	4489232	4492719	+	LOC110684387	--	K17086 transmembrane 9 superfamily member 2/4 | (RefSeq) uncharacterized LOC101300290 (A)	uncharacterized protein LOC110684387 [Chenopodium quinoa]	--	SubName: Full=Uncharacterized protein {ECO:0000313|EMBL:KNA10075.1}; Flags: Fragment;	--	GO:0003677,DNA binding; GO:0004803,transposase activity; GO:0006313,transposition, DNA-mediated	MULE transposase domain
gene-LOC110684423	0.05	0.26	0	0.32	1.8	1.27	1	5	0	6	38	23	15.273	3.933	0.000817772	0.00649768	up	NW_018743697.1	4980300	4983022	-	LOC110684423	--	--	uncharacterized protein LOC110684423 [Chenopodium quinoa]	--	SubName: Full=Uncharacterized protein {ECO:0000313|EMBL:KNA22348.1};	--	--	Plant transposase (Ptta/En/Spm family)
gene-LOC110684427	100.05	85.8	87.81	178.58	132.05	119.83	1678	1504	1532	3053	2543	1978	2.017	1.012	1.48712e-07	4.36045e-06	up	NW_018742271.1	308153	309053	-	LOC110684427	--	K10840 centrin-2 | (RefSeq) calcium-binding protein PBP1-like (A)	calcium-binding protein PBP1-like [Chenopodium quinoa]	RecName: Full=Calcium-binding protein PBP1; AltName: Full=KIC-related protein 2; AltName: Full=PINOID-binding protein 1;	SubName: Full=Uncharacterized protein {ECO:0000313|EMBL:KNA11677.1};	Ca2+-binding protein (centrin/caltractin), EF-Hand superfamily protein	GO:0005509,calcium ion binding; GO:0009733,response to auxin	EF-hand domain pair
gene-LOC110684430	3.38	2.72	3.34	3.28	10.22	7.08	107	90	110	106	372	221	2.917	1.544	0.0014158	0.0100479	up	NW_018743697.1	5057000	5061441	-	LOC110684430	--	K00679 phospholipid:diacylglycerol acyltransferase [EC:2.3.1.158] | (RefSeq) hypothetical protein (A)	LOW QUALITY PROTEIN: GDSL esterase/lipase 2-like [Chenopodium quinoa]	RecName: Full=GDSL esterase/lipase 2; EC=3.1.1.-; AltName: Full=Extracellular lipase 2; Flags: Precursor;	SubName: Full=GDSL-lipase {ECO:0000313|EMBL:AAP55714.1};	--	GO:0005576,extracellular region; GO:0016298,lipase activity; GO:0009734,auxin-activated signaling pathway; GO:0009814,defense response, incompatible interaction; GO:0016042,lipid catabolic process; GO:0006629,lipid metabolic process; GO:0010930,negative regulation of auxin mediated signaling pathway; GO:0009723,response to ethylene; GO:0009753,response to jasmonic acid; GO:0009751,response to sal…	GDSL-like Lipase/Acylhydrolase
gene-LOC110684463	5.38	3.65	5.11	8.06	10.33	11.12	176	125	174	269	388	358	2.719	1.443	8.67581e-06	0.000152654	up	NW_018742271.1	461462	463219	+	LOC110684463	--	K12135 zinc finger protein CONSTANS | (RefSeq) hypothetical protein (A)	nucleolin-like [Chenopodium quinoa]	RecName: Full=B-box zinc finger protein 32 {ECO:0000303|PubMed:19920209}; AltName: Full=EIP6, EMF1-INTERACTING PROTEIN 6;	SubName: Full=Uncharacterized protein {ECO:0000313|EMBL:KNA20983.1};	--	GO:0005737,cytoplasm; GO:0005634,nucleus; GO:0003700,DNA-binding transcription factor activity; GO:0008270,zinc ion binding; GO:0009785,blue light signaling pathway; GO:0045892,negative regulation of transcription, DNA-templated; GO:0009640,photomorphogenesis; GO:0010017,red or far-red light signaling pathway; GO:0009909,regulation of flower development; GO:0006355,regulation of transcription, DN…	B-box zinc finger
gene-LOC110684538	0.23	0.79	0.56	7.92	9.27	5.79	18	64	45	624	823	441	19.202	4.263	2.20582e-25	9.03379e-23	up	NW_018743712.1	80992	85522	+	LOC110684538	--	K09874 aquaporin NIP | (RefSeq) probable aquaporin NIP5-1 (A)	pollen-specific leucine-rich repeat extensin-like protein 1 [Chenopodium quinoa]	--	SubName: Full=Uncharacterized protein {ECO:0000313|EMBL:KNA08392.1};	--	--	Zinc knuckle
gene-LOC110684569	0	0	0	0.04	0.77	0.56	0	0	0	1	21	13	83.188	6.378	0.000677445	0.00558651	up	NW_018743722.1	1549861	1553815	+	LOC110684569	--	K17500 integrin-linked kinase-associated serine/threonine phosphatase 2C [EC:3.1.3.16] | (RefSeq) WAT1-related protein At3g18200 isoform X1 (A)	WAT1-related protein At2g37460-like isoform X1 [Chenopodium quinoa]	RecName: Full=WAT1-related protein At2g37460;	RecName: Full=WAT1-related protein {ECO:0000256|RuleBase:RU363077};	--	GO:0016021,integral component of membrane; GO:0005886,plasma membrane; GO:0015171,amino acid transmembrane transporter activity; GO:0032973,amino acid export across plasma membrane; GO:0080144,amino acid homeostasis; GO:0043090,amino acid import	EamA-like transporter family
gene-LOC110684570	0.03	0.09	0.13	0.57	0.21	0.14	2	6	9	38	16	9	4.563	2.19	0.00977874	0.0438049	up	NW_018743722.1	1695402	1701188	+	LOC110684570	--	K01881 prolyl-tRNA synthetase [EC:6.1.1.15] | (RefSeq) proline--tRNA ligase, cytoplasmic-like isoform X1 (A)	protein transport protein SEC23-1-like [Chenopodium quinoa]	RecName: Full=Protein transport protein Sec24-like At3g07100;	SubName: Full=Uncharacterized protein {ECO:0000313|EMBL:KCW46751.1};	Vesicle coat complex COPII, subunit SEC23	GO:0030127,COPII vesicle coat; GO:0005789,endoplasmic reticulum membrane; GO:0033116,endoplasmic reticulum-Golgi intermediate compartment membrane; GO:0000139,Golgi membrane; GO:0008270,zinc ion binding; GO:0007029,endoplasmic reticulum organization; GO:0080119,ER body organization; GO:0006888,ER to Golgi vesicle-mediated transport; GO:0007030,Golgi organization; GO:0006886,intracellular protein …	Sec23/Sec24 trunk domain
gene-LOC110684574	0.79	0.72	1.03	1.17	1.63	1.86	42	40	57	63	99	97	2.391	1.257	0.00181953	0.0122029	up	NW_018743722.1	2003760	2010610	+	LOC110684574	--	--	--	--	--	--	--	--
gene-LOC110684608	0.62	0.48	1.83	1.59	2.53	3.81	11	9	34	29	52	67	3.505	1.809	0.0099022	0.0442108	up	NW_018743732.1	193839	194798	-	LOC110684608	--	K13680 beta-mannan synthase [EC:2.4.1.32] | (RefSeq) probable mannan synthase 6 (A)	uncharacterized protein LOC110684608 [Chenopodium quinoa]	--	SubName: Full=Uncharacterized protein {ECO:0000313|EMBL:KNA06838.1};	--	GO:0009269,response to desiccation	Late embryogenesis abundant protein
gene-LOC110684633	6.46	2.76	7.49	13.88	18.12	15.57	257	115	310	563	828	610	3.649	1.867	1.51593e-05	0.000245876	up	NW_018743732.1	141156	143293	-	LOC110684633	--	K13161 heterogeneous nuclear ribonucleoprotein R | (RefSeq) nucleolin (A)	protein FANTASTIC FOUR 1-like [Chenopodium quinoa]	RecName: Full=Protein FANTASTIC FOUR 3;	SubName: Full=Uncharacterized protein {ECO:0000313|EMBL:KNA13593.1};	--	--	Fantastic Four meristem regulator
gene-LOC110684652	7.52	4.08	4.69	12.05	10.29	7.69	319	181	207	521	501	321	2.357	1.237	0.000171102	0.00183564	up	NW_018743732.1	388274	390551	+	LOC110684652	--	K12761 carbon catabolite-derepressing protein kinase [EC:2.7.11.1] | (RefSeq) CBL-interacting serine/threonine-protein kinase 11 (A)	CBL-interacting serine/threonine-protein kinase 11-like [Chenopodium quinoa]	RecName: Full=CBL-interacting serine/threonine-protein kinase 11; EC=2.7.11.1; AltName: Full=SNF1-related kinase 3.22; AltName: Full=SOS2-like protein kinase PKS5; AltName: Full=SOS3-interacting protein 4;	RecName: Full=Non-specific serine/threonine protein kinase {ECO:0000256|SAAS:SAAS00351747}; EC=2.7.11.1 {ECO:0000256|SAAS:SAAS00351747};	Serine/threonine protein kinase	GO:0005622,intracellular; GO:0005524,ATP binding; GO:0004672,protein kinase activity; GO:0004674,protein serine/threonine kinase activity; GO:0035556,intracellular signal transduction; GO:0018105,peptidyl-serine phosphorylation; GO:0018107,peptidyl-threonine phosphorylation; GO:0006468,protein phosphorylation; GO:0009268,response to pH	Protein kinase domain
gene-LOC110684712	0.05	0.1	0.14	12.96	9.46	7.39	1	2	3	265	218	146	132.075	7.045	4.31795e-26	1.93681e-23	up	NW_018743742.1	415001	417536	+	LOC110684712	--	K00549 5-methyltetrahydropteroyltriglutamate--homocysteine methyltransferase [EC:2.1.1.14] | (RefSeq) 5-methyltetrahydropteroyltriglutamate--homocysteine methyltransferase (A)	uncharacterized protein LOC110684712 [Chenopodium quinoa]	RecName: Full=5-methyltetrahydropteroyltriglutamate--homocysteine methyltransferase; EC=2.1.1.14; AltName: Full=Cobalamin-independent methionine synthase isozyme; AltName: Full=Vitamin-B12-independent methionine synthase isozyme;	SubName: Full=Methionine synthase {ECO:0000313|EMBL:BAE07181.1};	Methionine synthase II (cobalamin-independent)	GO:0005737,cytoplasm; GO:0003871,5-methyltetrahydropteroyltriglutamate-homocysteine S-methyltransferase activity; GO:0008270,zinc ion binding; GO:0009086,methionine biosynthetic process	Cobalamin-independent synthase, Catalytic domain
gene-LOC110684726	1.64	1.22	1.22	1.91	2.59	1.95	136	106	105	161	246	159	2.067	1.047	0.000830797	0.00657069	up	NW_018743754.1	61031	72902	-	LOC110684726	--	--	uncharacterized protein LOC110684726 [Chenopodium quinoa]	--	SubName: Full=Uncharacterized protein {ECO:0000313|EMBL:KNA17830.1};	--	GO:0016021,integral component of membrane	CemA family
gene-LOC110684732	24.66	24.91	22.36	23.91	83.27	92.18	773	816	729	764	2997	2844	3.752	1.908	0.000115822	0.00133618	up	NW_018743765.1	112263	118001	+	LOC110684732	--	K10301 F-box protein 21 | (RefSeq) hypothetical protein (A)	clp protease adapter protein ClpF, chloroplastic-like isoform X1 [Chenopodium quinoa]	RecName: Full=Clp protease adapter protein ClpF, chloroplastic {ECO:0000303|PubMed:26419670}; Flags: Precursor;	SubName: Full=Uncharacterized protein {ECO:0000313|EMBL:KNA03994.1};	--	GO:0009507,chloroplast; GO:0009840,chloroplastic endopeptidase Clp complex; GO:0003677,DNA binding	Hemimethylated DNA-binding protein YccV like
gene-LOC110684735	0.13	0.06	0.76	1.86	0.68	1.86	2	1	12	29	12	28	5.715	2.515	0.0109968	0.0477621	up	NW_018743766.1	17580	18399	-	LOC110684735	--	--	--	--	--	--	--	--
gene-LOC110684800	49.62	36.69	47.02	78.98	86.51	63.69	991	766	977	1608	1984	1252	2.22	1.151	7.66244e-06	0.000137544	up	NW_018743783.1	531444	534642	-	LOC110684800	--	--	--	--	--	--	--	--
gene-LOC110684823	0.62	0.11	0.62	0.35	1.28	3.88	21	4	22	12	50	130	5.353	2.42	0.0106252	0.0465886	up	NW_018743783.1	2058470	2062588	+	LOC110684823	--	--	--	--	--	--	--	--
gene-LOC110684834	4.9	5.16	3.98	9.95	10.22	8.3	129	142	109	267	309	215	2.653	1.407	3.24261e-10	1.65773e-08	up	NW_018743783.1	2438688	2443287	-	LOC110684834	--	K14855 ribosome assembly protein 4 | (RefSeq) notchless protein homolog (A)	notchless protein homolog, partial [Chenopodium quinoa]	RecName: Full=Notchless protein homolog {ECO:0000303|PubMed:23572950};	SubName: Full=Uncharacterized protein {ECO:0000313|EMBL:KNA23871.1};	Notchless-like WD40 repeat-containing protein	GO:0080008,Cul4-RING E3 ubiquitin ligase complex; GO:0005730,nucleolus; GO:0005840,ribosome; GO:0009553,embryo sac development; GO:0000027,ribosomal large subunit assembly	WD domain, G-beta repeat
gene-LOC110684838	1.47	2.64	2.75	3.04	5.27	5.71	48	90	93	101	197	183	2.721	1.444	0.000686887	0.00564953	up	NW_018743783.1	2579530	2585354	-	LOC110684838	--	K01968 3-methylcrotonyl-CoA carboxylase alpha subunit [EC:6.4.1.4] | (RefSeq) methylcrotonoyl-CoA carboxylase subunit alpha, mitochondrial (A)	serine/threonine-protein kinase STY8-like [Chenopodium quinoa]	RecName: Full=Serine/threonine-protein kinase STY13 {ECO:0000305}; EC=2.7.11.1 {ECO:0000269|PubMed:16429265}; AltName: Full=AtSTYPK {ECO:0000303|PubMed:17291444}; AltName: Full=Serine/threonine/tyrosine-protein kinase 13 {ECO:0000303|PubMed:16429265};	SubName: Full=Uncharacterized protein {ECO:0000313|EMBL:KNA22976.1};	Tyrosine kinase specific for activated (GTP-bound) p21cdc42Hs	GO:0005622,intracellular; GO:0005886,plasma membrane; GO:0005524,ATP binding; GO:0004672,protein kinase activity; GO:0004674,protein serine/threonine kinase activity; GO:0004712,protein serine/threonine/tyrosine kinase activity; GO:0004713,protein tyrosine kinase activity; GO:0004871,NA; GO:0035556,intracellular signal transduction; GO:0006468,protein phosphorylation	Protein tyrosine kinase
gene-LOC110684918	0	0	0	5.24	5.53	4.65	0	0	0	175	208	150	1228.82	10.263	3.34338e-17	5.38341e-15	up	NW_018743787.1	1927821	1930605	+	LOC110684918	--	--	--	--	--	--	--	--
gene-LOC110684941	0	0	0	1.83	0.54	0.45	0	0	0	21	7	5	73.398	6.198	0.000187448	0.00197557	up	NW_018743788.1	8453	11894	+	LOC110684941	--	--	uncharacterized protein LOC110738007 [Chenopodium quinoa]	--	SubName: Full=Uncharacterized protein {ECO:0000313|EMBL:KNA08153.1};	--	--	--
gene-LOC110684959	1.6	1.92	1.52	5.87	5.49	5.36	95	119	94	355	374	313	4.332	2.115	3.15841e-27	1.56582e-24	up	NW_018743791.1	8423	28932	-	LOC110684959	--	K02154 V-type H+-transporting ATPase subunit a | (RefSeq) V-type proton ATPase subunit a1-like isoform X1 (A)	V-type proton ATPase subunit a1-like isoform X1 [Chenopodium quinoa]	RecName: Full=V-type proton ATPase subunit a1; Short=V-ATPase subunit a1; AltName: Full=V-type proton ATPase 95 kDa subunit a isoform 1; Short=V-ATPase 95 kDa isoform a1; AltName: Full=Vacuolar H(+)-ATPase subunit a isoform 1; AltName: Full=Vacuolar proton pump subunit a1; AltName: Full=Vacuolar proton translocating ATPase 95 kDa subunit a isoform 1;	RecName: Full=V-type proton ATPase subunit a {ECO:0000256|RuleBase:RU361189};	Vacuolar H+-ATPase V0 sector, subunit a	GO:0005768,endosome; GO:0005794,Golgi apparatus; GO:0016021,integral component of membrane; GO:0000325,plant-type vacuole; GO:0005802,trans-Golgi network; GO:0012510,trans-Golgi network transport vesicle membrane; GO:0016471,vacuolar proton-transporting V-type ATPase complex; GO:0000220,vacuolar proton-transporting V-type ATPase, V0 domain; GO:0005773,vacuole; GO:0051117,ATPase binding; GO:004696…	V-type ATPase 116kDa subunit family
gene-LOC110684969	1.63	1.65	2	2.24	4.01	3.02	73	77	93	102	206	133	2.318	1.213	0.00122429	0.00893965	up	NW_018743791.1	141075	146468	-	LOC110684969	--	K21398 natural resistance-associated macrophage protein 2 | (RefSeq) metal transporter Nramp6-like (A)	metal transporter Nramp6-like [Chenopodium quinoa]	RecName: Full=Metal transporter Nramp6; Short=AtNramp6;	SubName: Full=Uncharacterized protein {ECO:0000313|EMBL:KNA10318.1};	Mn2+ and Fe2+ transporters of the NRAMP family	GO:0012505,endomembrane system; GO:0016021,integral component of membrane; GO:0015086,cadmium ion transmembrane transporter activity; GO:0070574,cadmium ion transmembrane transport; GO:0055072,iron ion homeostasis	Natural resistance-associated macrophage protein
gene-LOC110684976	52.02	35.21	62.44	68.09	81.8	90.15	1682	1190	2100	2244	3037	2869	2.075	1.053	0.00132578	0.00953808	up	NW_018743791.1	252514	255092	+	LOC110684976	--	--	photosynthetic NDH subunit of subcomplex B 1, chloroplastic-like [Chenopodium quinoa]	RecName: Full=Photosynthetic NDH subunit of subcomplex B 1, chloroplastic {ECO:0000303|PubMed:21785130}; Short=Protein PnsB1 {ECO:0000303|PubMed:21785130}; AltName: Full=NAD(P)H DEHYDROGENASE SUBUNIT 48 {ECO:0000303|PubMed:18974055}; AltName: Full=NDH-DEPENDENT CYCLIC ELECTRON FLOW 1 {ECO:0000303|PubMed:18785996}; Flags: Precursor;	SubName: Full=Uncharacterized protein {ECO:0000313|EMBL:KNA24707.1};	--	GO:0009507,chloroplast; GO:0009534,chloroplast thylakoid; GO:0009535,chloroplast thylakoid membrane; GO:0010598,NAD(P)H dehydrogenase complex (plastoquinone); GO:0009773,photosynthetic electron transport in photosystem I	Glycosyltransferase family 9 (heptosyltransferase)
gene-LOC110685002	1.56	2.21	1.92	2.72	4.89	3.73	64	95	82	114	231	151	2.66	1.411	0.000108899	0.00126992	up	NW_018743791.1	516648	521206	-	LOC110685002	--	K00275 pyridoxamine 5'-phosphate oxidase [EC:1.4.3.5] | (RefSeq) pyridoxamine 5'-phosphate oxidase isoform 1 (A)	probable zinc metallopeptidase EGY3, chloroplastic [Chenopodium quinoa]	RecName: Full=Probable zinc metallopeptidase EGY3, chloroplastic; EC=3.4.24.-; AltName: Full=Protein ETHYLENE-DEPENDENT GRAVITROPISM-DEFICIENT AND YELLOW-GREEN 3; Short=AtEGY3; Flags: Precursor;	SubName: Full=Uncharacterized protein {ECO:0000313|EMBL:OMO63415.1};	--	GO:0031969,chloroplast membrane; GO:0016021,integral component of membrane; GO:0008237,metallopeptidase activity; GO:0009408,response to heat; GO:0009644,response to high light intensity; GO:0042542,response to hydrogen peroxide	Peptidase family M50
gene-LOC110685006	21.34	20.11	22.24	21.98	34.16	42.58	524	516	568	550	963	1029	2.05	1.036	0.00206106	0.0133963	up	NW_018743791.1	543272	547023	-	LOC110685006	--	--	uncharacterized protein LOC110685006 [Chenopodium quinoa]	--	SubName: Full=Uncharacterized protein {ECO:0000313|EMBL:KNA09346.1};	--	GO:0016021,integral component of membrane	--
gene-LOC110685015	10.75	7.76	9.99	11.06	29.02	16.65	391	295	378	410	1212	596	2.64	1.401	0.00115901	0.00856257	up	NW_018743791.1	699559	702164	+	LOC110685015	--	--	uncharacterized protein LOC110685015 [Chenopodium quinoa]	--	SubName: Full=Uncharacterized protein {ECO:0000313|EMBL:KNA18253.1};	--	--	Protein of unknown function (DUF1005)
gene-LOC110685022	0.51	0.12	1.95	2.74	34.34	245.69	8	2	32	44	621	3808	142.348	7.153	2.05629e-05	0.000318311	up	NW_018743791.1	731573	732418	+	LOC110685022	--	K13449 pathogenesis-related protein 1 | (RefSeq) pathogenesis-related protein PR-1 type-like (A)	pathogenesis-related protein PR-1 type-like [Chenopodium quinoa]	RecName: Full=Pathogenesis-related protein PR-1 type; Flags: Precursor;	SubName: Full=Uncharacterized protein {ECO:0000313|EMBL:KNA21092.1};	Defense-related protein containing SCP domain	GO:0005576,extracellular region; GO:0006952,defense response; GO:0009607,response to biotic stimulus	Cysteine-rich secretory protein family
gene-LOC110685025	1.1	0.15	0.08	1.64	2.23	4.54	41	6	3	62	95	166	8.257	3.046	0.000650239	0.00540355	up	NW_018743791.1	755218	758088	-	LOC110685025	--	K23810 (E)-8-carboxylinalool synthase [EC:1.14.14.-] | (RefSeq) geraniol 8-hydroxylase (A)	cytochrome P450 76AD1-like [Chenopodium quinoa]	RecName: Full=Cytochrome P450 76AD1 {ECO:0000303|PubMed:22660548}; EC=1.14.-.- {ECO:0000305};	SubName: Full=Cytochrome P450 CYP76AD5 {ECO:0000313|EMBL:AJD87473.1};	Cytochrome P450 CYP2 subfamily	GO:0016021,integral component of membrane; GO:0020037,heme binding; GO:0005506,iron ion binding; GO:0004497,monooxygenase activity; GO:0016705,oxidoreductase activity, acting on paired donors, with incorporation or reduction of molecular oxygen	Cytochrome P450
gene-LOC110685040	6.09	6.69	7.07	7.88	14.26	11.01	222	255	268	293	597	395	2.213	1.146	0.000512552	0.00444055	up	NW_018743791.1	893620	896583	-	LOC110685040	--	K03100 signal peptidase I [EC:3.4.21.89] | (RefSeq) uncharacterized protein LOC18104955 (A)	uncharacterized protein LOC110685040 [Chenopodium quinoa]	--	SubName: Full=Uncharacterized protein {ECO:0000313|EMBL:KNA11138.1};	--	--	--
gene-LOC110685054	23.32	20.69	26.46	28.86	44.25	38.19	688	638	812	868	1499	1109	2.072	1.051	0.000444674	0.00397024	up	NW_018743791.1	1009037	1014438	+	LOC110685054	--	--	phosphoglycerate mutase-like protein 1 [Chenopodium quinoa]	RecName: Full=Phosphoglycerate mutase-like protein 1 {ECO:0000305};	SubName: Full=Uncharacterized protein {ECO:0000313|EMBL:KNA08877.1};	Predicted phosphoglycerate mutase	GO:0005829,cytosol	Histidine phosphatase superfamily (branch 1)
gene-LOC110685088	0.9	1.1	0.73	0.93	2.09	2.46	39	50	33	41	104	105	2.704	1.435	0.00382692	0.0213458	up	NW_018743791.1	113098	116312	+	LOC110685088	--	K05391 cyclic nucleotide gated channel, plant | (RefSeq) cyclic nucleotide-gated ion channel 1-like (A)	wall-associated receptor kinase-like 6 [Chenopodium quinoa]	RecName: Full=Wall-associated receptor kinase-like 2; EC=2.7.11.-; Flags: Precursor;	SubName: Full=Uncharacterized protein {ECO:0000313|EMBL:KNA18552.1};	--	GO:0016021,integral component of membrane; GO:0009505,plant-type cell wall; GO:0005886,plasma membrane; GO:0005524,ATP binding; GO:0005509,calcium ion binding; GO:0030247,polysaccharide binding; GO:0004674,protein serine/threonine kinase activity; GO:0007166,cell surface receptor signaling pathway; GO:0046777,protein autophosphorylation	Protein kinase domain
gene-LOC110685167	0	0	0	2.74	1.57	1.69	0	0	0	141	91	84	721.794	9.495	1.88201e-14	2.02024e-12	up	NW_018743792.1	528893	533502	-	LOC110685167	--	--	--	--	--	--	--	--
gene-LOC110685195	3.6	5.17	6.29	5.86	9.69	9.56	88	132	160	146	272	230	2.205	1.14	0.00295774	0.0175887	up	NW_018743792.1	2064582	2068739	-	LOC110685195	--	K10666 E3 ubiquitin-protein ligase RNF5 [EC:2.3.2.27] | (RefSeq) E3 ubiquitin-protein ligase RMA1H1-like (A)	E3 ubiquitin-protein ligase RMA1H1-like [Chenopodium quinoa]	RecName: Full=E3 ubiquitin-protein ligase RMA1H1; EC=2.3.2.27; AltName: Full=Protein RING membrane-anchor 1 homolog 1; AltName: Full=RING-type E3 ubiquitin transferase RMA1H1 {ECO:0000305};	SubName: Full=Uncharacterized protein {ECO:0000313|EMBL:KNA20434.1};	Predicted E3 ubiquitin ligase	GO:0005789,endoplasmic reticulum membrane; GO:0016021,integral component of membrane; GO:0046872,metal ion binding; GO:0004842,ubiquitin-protein transferase activity; GO:0043161,proteasome-mediated ubiquitin-dependent protein catabolic process; GO:0016567,protein ubiquitination; GO:0009409,response to cold; GO:0009723,response to ethylene; GO:0006970,response to osmotic stress; GO:0009414,respons…	Zinc finger, C3HC4 type (RING finger)
gene-LOC110685275	0.14	0.34	0.12	2.33	2.33	1.54	8	20	7	135	152	86	13.737	3.78	1.25992e-16	1.87634e-14	up	NW_018743796.1	7120	14207	-	LOC110685275	--	--	--	--	--	--	--	--
gene-LOC110685298	0.02	0	0	0.04	0.27	0.18	1	0	0	2	14	8	29.013	4.859	0.00476261	0.0252527	up	NW_018743800.1	26147	29528	+	LOC110685298	--	K01051 pectinesterase [EC:3.1.1.11] | (RefSeq) uncharacterized protein LOC110634634 (A)	LOW QUALITY PROTEIN: pectinesterase 3-like [Chenopodium quinoa]	RecName: Full=Pectinesterase 3; Short=PE 3; EC=3.1.1.11; AltName: Full=Pectin methylesterase 3; Flags: Precursor;	RecName: Full=Pectinesterase {ECO:0000256|RuleBase:RU000589}; EC=3.1.1.11 {ECO:0000256|RuleBase:RU000589};	--	GO:0005618,cell wall; GO:0005576,extracellular region; GO:0045330,aspartyl esterase activity; GO:0004857,enzyme inhibitor activity; GO:0030599,pectinesterase activity; GO:0042545,cell wall modification; GO:0045490,pectin catabolic process	Pectinesterase
gene-LOC110685309	0.21	0.37	0.08	0.58	0.87	1.83	7	13	3	20	34	61	6.804	2.766	0.000206089	0.00214089	up	NW_018743812.1	42255	45838	-	LOC110685309	--	K13667 protein glucosyltransferase [EC:2.4.1.-] | (RefSeq) O-glucosyltransferase rumi (A)	O-glucosyltransferase rumi homolog [Chenopodium quinoa]	--	SubName: Full=Uncharacterized protein {ECO:0000313|EMBL:KNA04576.1};	Endoplasmic reticulum protein EP58, contains filamin rod domain and KDEL motif	--	Glycosyl transferase family 90
gene-LOC110685325	0.04	0	0	6.28	6.19	0.08	1	0	0	155	172	2	370.754	8.534	5.13883e-05	0.000685869	up	NW_018743812.1	191901	196077	-	LOC110685325	--	K00028 malate dehydrogenase (decarboxylating) [EC:1.1.1.39] | (RefSeq) NAD-dependent malic enzyme 59 kDa isoform, mitochondrial-like (A)	NAD-dependent malic enzyme 59 kDa isoform, mitochondrial-like [Chenopodium quinoa]	RecName: Full=NAD-dependent malic enzyme 59 kDa isoform, mitochondrial; Short=NAD-ME; EC=1.1.1.39; Flags: Precursor;	RecName: Full=Malic enzyme {ECO:0000256|RuleBase:RU003426};	NADP+-dependent malic enzyme	GO:0005759,mitochondrial matrix; GO:0004471,malate dehydrogenase (decarboxylating) (NAD+) activity; GO:0046872,metal ion binding; GO:0051287,NAD binding	Malic enzyme, NAD binding domain
gene-LOC110685327	0.78	0.37	0.35	4.87	3.77	6.66	32	16	15	203	177	268	13.183	3.721	3.46656e-17	5.53446e-15	up	NW_018743812.1	206148	214131	+	LOC110685327	--	K00028 malate dehydrogenase (decarboxylating) [EC:1.1.1.39] | (RefSeq) LOW QUALITY PROTEIN: NAD-dependent malic enzyme 59 kDa isoform, mitochondrial-like (A)	LOW QUALITY PROTEIN: NAD-dependent malic enzyme 59 kDa isoform, mitochondrial-like [Chenopodium quinoa]	RecName: Full=NAD-dependent malic enzyme 59 kDa isoform, mitochondrial; Short=NAD-ME; EC=1.1.1.39; Flags: Precursor;	RecName: Full=Malic enzyme {ECO:0000256|RuleBase:RU003426};	NADP+-dependent malic enzyme	GO:0005759,mitochondrial matrix; GO:0004471,malate dehydrogenase (decarboxylating) (NAD+) activity; GO:0046872,metal ion binding; GO:0051287,NAD binding	Malic enzyme, NAD binding domain
gene-LOC110685328	0	0	0.06	1.94	1.95	1.91	0	0	2	59	67	56	115.989	6.858	5.43728e-10	2.685e-08	up	NW_018743812.1	220632	226599	-	LOC110685328	--	K08657 taspase, threonine aspartase, 1 [EC:3.4.25.-] | (RefSeq) putative threonine aspartase isoform X1 (A)	putative threonine aspartase isoform X1 [Chenopodium quinoa]	RecName: Full=Putative threonine aspartase; Short=Taspase-1; EC=3.4.25.-; Contains: RecName: Full=Putative threonine aspartase subunit alpha; Contains: RecName: Full=Putative threonine aspartase subunit beta; Flags: Precursor;	SubName: Full=Uncharacterized protein {ECO:0000313|EMBL:KNA15030.1};	Asparaginase	GO:0004298,threonine-type endopeptidase activity	Asparaginase
gene-LOC110685329	0.3	0.41	0.54	24.42	25.79	24.05	7	10	13	574	683	546	76.847	6.264	1.28847e-71	9.70943e-68	up	NW_018743812.1	215375	217517	+	LOC110685329	--	K15095 (+)-neomenthol dehydrogenase [EC:1.1.1.208] | (RefSeq) LOW QUALITY PROTEIN: (+)-neomenthol dehydrogenase-like (A)	LOW QUALITY PROTEIN: (+)-neomenthol dehydrogenase-like [Chenopodium quinoa]	RecName: Full=(+)-neomenthol dehydrogenase {ECO:0000303|PubMed:18599651}; EC=1.1.1.- {ECO:0000269|PubMed:21169366}; EC=1.1.1.208 {ECO:0000269|PubMed:18599651}; AltName: Full=Menthone:neomenthol reductase; AltName: Full=Short-chain dehydrogenase/reductase 1; Short=AtSDR1;	SubName: Full=Uncharacterized protein {ECO:0000313|EMBL:KNA15032.1};	Dehydrogenases with different specificities (related to short-chain alcohol dehydrogenases)	GO:0005737,cytoplasm; GO:0047501,(+)-neomenthol dehydrogenase activity; GO:0006952,defense response	short chain dehydrogenase
gene-LOC110685331	0	0.17	0.07	4.16	2.42	2.71	0	5	2	116	76	73	48.591	5.603	4.75841e-16	6.51954e-14	up	NW_018743812.1	227444	230344	-	LOC110685331	--	K00288 methylenetetrahydrofolate dehydrogenase (NADP+) / methenyltetrahydrofolate cyclohydrolase / formyltetrahydrofolate synthetase [EC:1.5.1.5 3.5.4.9 6.3.4.3] | (RefSeq) C-1-tetrahydrofolate synthase, cytoplasmic-like (A)	bifunctional protein FolD 4, chloroplastic-like [Chenopodium quinoa]	RecName: Full=Bifunctional protein FolD 4, chloroplastic; AltName: Full=Protein EMBRYO DEFECTIVE 3127; AltName: Full=Tetrahydrofolate dehydrogenase/cyclohydrolase 4; Includes: RecName: Full=Methylenetetrahydrofolate dehydrogenase; EC=1.5.1.5; Includes: RecName: Full=Methenyltetrahydrofolate cyclohydrolase; EC=3.5.4.9; Flags: Precursor;	SubName: Full=Uncharacterized protein {ECO:0000313|EMBL:KNA08607.1};	Methylenetetrahydrofolate dehydrogenase/methylenetetrahydrofolate cyclohydrolase	GO:0009507,chloroplast; GO:0005829,cytosol; GO:0004477,methenyltetrahydrofolate cyclohydrolase activity; GO:0004488,methylenetetrahydrofolate dehydrogenase (NADP+) activity; GO:0006730,one-carbon metabolic process; GO:0009853,photorespiration; GO:0035999,tetrahydrofolate interconversion	Tetrahydrofolate dehydrogenase/cyclohydrolase, NAD(P)-binding domain
gene-LOC110685332	0.06	0.07	0.06	6.11	10.51	7.79	5	6	5	503	975	619	168.603	7.397	2.5465e-50	7.38055e-47	up	NW_018743812.1	232011	245638	-	LOC110685332	--	--	K(+) efflux antiporter 2, chloroplastic-like [Chenopodium quinoa]	RecName: Full=K(+) efflux antiporter 1, chloroplastic {ECO:0000303|PubMed:11500563}; Short=AtKEA1 {ECO:0000303|PubMed:11500563}; Flags: Precursor;	SubName: Full=Uncharacterized protein {ECO:0000313|EMBL:KNA15026.1};	Predicted K+/H+-antiporter	GO:0009507,chloroplast; GO:0009941,chloroplast envelope; GO:0031969,chloroplast membrane; GO:0016021,integral component of membrane; GO:0016020,membrane; GO:0015386,potassium:proton antiporter activity; GO:0009658,chloroplast organization; GO:0010109,regulation of photosynthesis	Sodium/hydrogen exchanger family
gene-LOC110685333	0.03	0	0	1.54	1.93	1.04	1	0	0	46	65	30	165.48	7.371	1.33762e-08	4.93138e-07	up	NW_018743812.1	247278	254633	-	LOC110685333	--	--	AUGMIN subunit 7-like [Chenopodium quinoa]	RecName: Full=AUGMIN subunit 7 {ECO:0000303|PubMed:22505726};	SubName: Full=Uncharacterized protein {ECO:0000313|EMBL:KNA15025.1};	--	GO:0009524,phragmoplast; GO:0005876,spindle microtubule; GO:0051011,microtubule minus-end binding; GO:0007049,cell cycle; GO:0051301,cell division	Plant nuclear matrix protein 1 (NMP1)
gene-LOC110685335	0.12	0.11	0.04	7.04	4.4	4.71	3	3	1	186	131	120	79.245	6.308	1.69841e-23	5.71365e-21	up	NW_018743812.1	268059	278025	-	LOC110685335	--	K14397 cleavage and polyadenylation specificity factor subunit 5 | (RefSeq) pre-mRNA cleavage factor Im 25 kDa subunit 2-like (A)	pre-mRNA cleavage factor Im 25 kDa subunit 2-like [Chenopodium quinoa]	RecName: Full=Pre-mRNA cleavage factor Im 25 kDa subunit 2 {ECO:0000303|PubMed:18479511};	SubName: Full=Uncharacterized protein {ECO:0000313|EMBL:KNA08844.1};	mRNA cleavage factor I subunit	GO:0005849,mRNA cleavage factor complex; GO:0016787,hydrolase activity; GO:0046872,metal ion binding; GO:0003729,mRNA binding; GO:0006378,mRNA polyadenylation	Nucleotide hydrolase
gene-LOC110685336	0	0.05	0.08	1	0.25	0.47	0	3	5	61	17	28	16.626	4.055	1.08525e-05	0.000184024	up	NW_018743812.1	302206	307431	+	LOC110685336	--	--	uncharacterized protein LOC110685336 [Chenopodium quinoa]	--	SubName: Full=Uncharacterized protein {ECO:0000313|EMBL:KNA08845.1};	--	--	Acyclic terpene utilisation family protein AtuA
gene-LOC110685337	0	0	0	0.07	0.06	0.27	0	0	0	3	3	11	41.361	5.37	0.00557462	0.0284994	up	NW_018743812.1	307600	310750	+	LOC110685337	--	K09377 cysteine and glycine-rich protein | (RefSeq) LIM domain-containing protein PLIM2c-like (A)	LIM domain-containing protein PLIM2c-like [Chenopodium quinoa]	RecName: Full=LIM domain-containing protein PLIM2c {ECO:0000305}; AltName: Full=Pollen-expressed LIM protein 2C {ECO:0000305};	SubName: Full=Regulatory protein MLP {ECO:0000313|EMBL:PIN09799.1};	Regulatory protein MLP and related LIM proteins	GO:0005737,cytoplasm; GO:0005856,cytoskeleton; GO:0051015,actin filament binding; GO:0046872,metal ion binding; GO:0051017,actin filament bundle assembly	LIM domain
gene-LOC110685338	0.06	0.98	0.15	6.6	5.22	5.18	3	52	8	340	303	258	19.51	4.286	4.36258e-09	1.76366e-07	up	NW_018743812.1	312108	319895	+	LOC110685338	--	K12614 ATP-dependent RNA helicase DDX6/DHH1 [EC:3.6.4.13] | (RefSeq) DEAD-box ATP-dependent RNA helicase 8-like isoform X1 (A)	DEAD-box ATP-dependent RNA helicase 8-like isoform X1 [Chenopodium quinoa]	RecName: Full=DEAD-box ATP-dependent RNA helicase 8; EC=3.6.4.13;	SubName: Full=DEAD-box ATP-dependent RNA helicase 8-like {ECO:0000313|RefSeq:XP_018845393.1};	ATP-dependent RNA helicase	GO:0010494,cytoplasmic stress granule; GO:0005730,nucleolus; GO:0000932,P-body; GO:0005524,ATP binding; GO:0004004,ATP-dependent RNA helicase activity; GO:0003729,mRNA binding; GO:0033962,cytoplasmic mRNA processing body assembly; GO:0006397,mRNA processing; GO:0051028,mRNA transport; GO:0006417,regulation of translation; GO:0010501,RNA secondary structure unwinding; GO:0016032,viral process	DEAD/DEAH box helicase
gene-LOC110685341	0.12	0.22	0	4.75	3.11	2.24	4	8	0	167	123	76	38.99	5.285	1.23015e-16	1.84474e-14	up	NW_018743812.1	332695	336741	-	LOC110685341	--	K00930 acetylglutamate kinase [EC:2.7.2.8] | (RefSeq) uncharacterized protein LOC110685341 (A)	uncharacterized protein LOC110685313 [Chenopodium quinoa]	RecName: Full=Acetylglutamate kinase, chloroplastic; EC=2.7.2.8; AltName: Full=N-acetyl-L-glutamate 5-phosphotransferase; AltName: Full=NAG kinase; Short=AtNAGK; Flags: Precursor;	SubName: Full=Uncharacterized protein {ECO:0000313|EMBL:KNA07948.1};	Acetylglutamate kinase/acetylglutamate synthase	GO:0009507,chloroplast; GO:0009570,chloroplast stroma; GO:0009534,chloroplast thylakoid; GO:0003991,acetylglutamate kinase activity; GO:0034618,arginine binding; GO:0005524,ATP binding; GO:0042450,arginine biosynthetic process via ornithine	Amino acid kinase family
gene-LOC110685343	0	0	0	0.49	0.2	0.14	0	0	0	83	38	23	321.52	8.329	9.34688e-10	4.39117e-08	up	NW_018743812.1	342968	356930	-	LOC110685343	--	K10706 senataxin [EC:3.6.4.-] | (RefSeq) uncharacterized LOC100855072 (A)	uncharacterized protein LOC110685343 [Chenopodium quinoa]	RecName: Full=Probable helicase MAGATAMA 3; EC=3.6.4.-; AltName: Full=SEN1-like protein;	SubName: Full=Uncharacterized protein {ECO:0000313|EMBL:KNA11547.1};	tRNA-splicing endonuclease positive effector (SEN1)	GO:0005634,nucleus; GO:0005524,ATP binding; GO:0004386,helicase activity; GO:0009553,embryo sac development; GO:0010183,pollen tube guidance; GO:0009875,pollen-pistil interaction	AAA domain
gene-LOC110685344	0.02	0.07	0	0.86	0.79	0.52	1	3	0	36	37	21	30.143	4.914	1.39931e-07	4.14165e-06	up	NW_018743812.1	365553	372160	+	LOC110685344	--	K15440 tRNA-specific adenosine deaminase 1 [EC:3.5.4.34] | (RefSeq) tRNA-specific adenosine deaminase 1-like isoform X1 (A)	tRNA-specific adenosine deaminase 1-like isoform X1 [Chenopodium quinoa]	--	SubName: Full=Uncharacterized protein {ECO:0000313|EMBL:KNA04574.1};	tRNA-specific adenosine deaminase 1	GO:0004000,adenosine deaminase activity; GO:0003723,RNA binding; GO:0006396,RNA processing	Adenosine-deaminase (editase) domain
gene-LOC110685345	0	0.03	0.2	0.66	1.06	1.09	0	1	7	23	42	37	16.18	4.016	3.64748e-05	0.000515297	up	NW_018743812.1	376399	380083	+	LOC110685345	--	K13667 protein glucosyltransferase [EC:2.4.1.-] | (RefSeq) O-glucosyltransferase rumi (A)	O-glucosyltransferase rumi homolog [Chenopodium quinoa]	--	SubName: Full=Uncharacterized protein {ECO:0000313|EMBL:KNA04576.1};	Endoplasmic reticulum protein EP58, contains filamin rod domain and KDEL motif	--	Glycosyl transferase family 90
gene-LOC110685347	0	0	0	2.09	2.69	3.07	0	0	0	93	135	132	842.826	9.719	6.59198e-15	7.43631e-13	up	NW_018743812.1	610371	613402	+	LOC110685347	--	--	F-box/LRR-repeat protein At1g06630-like [Chenopodium quinoa]	RecName: Full=Putative F-box/FBD/LRR-repeat protein At3g59240;	SubName: Full=Uncharacterized protein {ECO:0000313|EMBL:KNA21087.1};	--	--	FBD
gene-LOC110685349	0	0	0	0.37	0.66	0.57	0	0	0	17	34	25	177.372	7.471	6.29626e-08	2.03806e-06	up	NW_018743812.1	634006	637093	+	LOC110685349	--	--	F-box/LRR-repeat protein At1g06630-like isoform X1 [Chenopodium quinoa]	RecName: Full=Putative F-box/LRR-repeat protein At3g58920;	SubName: Full=Uncharacterized protein {ECO:0000313|EMBL:KNA21087.1};	--	--	FBD
gene-LOC110685351	0	0	0	0.22	0.16	0.18	0	0	0	10	8	8	59.934	5.905	0.000212518	0.00219557	up	NW_018743812.1	649991	653016	+	LOC110685351	--	--	F-box/LRR-repeat protein At3g58900-like isoform X3 [Chenopodium quinoa]	RecName: Full=Putative F-box/FBD/LRR-repeat protein At3g59240;	SubName: Full=Uncharacterized protein {ECO:0000313|EMBL:KNA21087.1};	--	--	FBD
gene-LOC110685352	0.02	0	0.02	1.42	1.72	2.14	1	0	1	66	90	96	162.682	7.346	3.19088e-11	1.9938e-09	up	NW_018743812.1	661927	665067	+	LOC110685352	--	--	F-box/LRR-repeat protein At1g06630-like [Chenopodium quinoa]	RecName: Full=Putative F-box/FBD/LRR-repeat protein At3g59240;	SubName: Full=Uncharacterized protein {ECO:0000313|EMBL:KNA21087.1};	--	--	FBD
gene-LOC110685354	0	0	0	2.75	2.22	2.12	0	0	0	279	253	207	1698.28	10.73	5.56303e-19	1.15167e-16	up	NW_018743812.1	690532	696562	+	LOC110685354	--	K03241 translation initiation factor eIF-2B subunit gamma | (RefSeq) translation initiation factor eIF-2B subunit gamma-like (A)	probable translation initiation factor eIF-2B subunit gamma [Chenopodium quinoa]	--	SubName: Full=Uncharacterized protein {ECO:0000313|EMBL:KNA24342.1};	Translation initiation factor 2B, gamma subunit (eIF-2Bgamma/GCD1)	--	MobA-like NTP transferase domain
gene-LOC110685369	3.06	1.52	1.22	10.09	5.99	19.05	156	81	65	525	351	957	7.893	2.981	8.22271e-09	3.16541e-07	up	NW_018743812.1	829561	837200	+	LOC110685369	--	K18696 glycerophosphodiester phosphodiesterase [EC:3.1.4.46] | (RefSeq) glycerophosphocholine phosphodiesterase GDE1-like (A)	SPX domain-containing membrane protein At4g22990-like isoform X1 [Chenopodium quinoa]	RecName: Full=SPX domain-containing membrane protein At4g22990;	SubName: Full=Uncharacterized protein {ECO:0000313|EMBL:KNA17609.1};	Predicted transporter/transmembrane protein	GO:0016021,integral component of membrane; GO:0055085,transmembrane transport	Major Facilitator Superfamily
gene-LOC110685392	0.4	0.2	0.25	0.83	0.64	0.78	15	8	10	32	28	29	3.407	1.768	0.000977613	0.00747302	up	NW_018743812.1	186156	190466	-	LOC110685392	--	K15095 (+)-neomenthol dehydrogenase [EC:1.1.1.208] | (RefSeq) LOW QUALITY PROTEIN: (+)-neomenthol dehydrogenase-like (A)	LOW QUALITY PROTEIN: (+)-neomenthol dehydrogenase-like [Chenopodium quinoa]	RecName: Full=(+)-neomenthol dehydrogenase {ECO:0000303|PubMed:18599651}; EC=1.1.1.- {ECO:0000269|PubMed:21169366}; EC=1.1.1.208 {ECO:0000269|PubMed:18599651}; AltName: Full=Menthone:neomenthol reductase; AltName: Full=Short-chain dehydrogenase/reductase 1; Short=AtSDR1;	SubName: Full=Uncharacterized protein {ECO:0000313|EMBL:KNA15032.1};	Dehydrogenases with different specificities (related to short-chain alcohol dehydrogenases)	GO:0005737,cytoplasm; GO:0047501,(+)-neomenthol dehydrogenase activity; GO:0006952,defense response	short chain dehydrogenase
gene-LOC110685413	0.08	0.77	0.31	17.91	13.8	13.16	1	10	4	227	197	161	50.234	5.651	3.62445e-30	2.67768e-27	up	NW_018743813.1	2403309	2404459	+	LOC110685413	--	--	--	--	--	--	--	--
gene-LOC110685422	24.55	19.99	14.26	87.18	85.62	101.98	753	641	455	2726	3016	3079	6.127	2.615	8.20013e-24	2.91476e-21	up	NW_018743813.1	736246	741924	+	LOC110685422	--	K09060 plant G-box-binding factor | (RefSeq) bZIP transcription factor 16-like (A)	UV-B-induced protein At3g17800, chloroplastic-like [Chenopodium quinoa]	RecName: Full=UV-B-induced protein At3g17800, chloroplastic {ECO:0000305}; Flags: Precursor;	SubName: Full=Uncharacterized protein {ECO:0000313|EMBL:KNA17639.1};	--	GO:0009507,chloroplast; GO:0010193,response to ozone; GO:0010224,response to UV-B; GO:0009611,response to wounding	Protein of unknown function (DUF760)
gene-LOC110685425	0.2	0.26	0.13	1.41	0.89	0.49	3	4	2	21	15	7	5.998	2.585	0.00266672	0.0163074	up	NW_018743813.1	1701190	1704279	-	LOC110685425	--	--	--	--	--	--	--	--
gene-LOC110685432	0.02	0.02	0	0.11	0.24	0.26	1	1	0	5	13	12	19.715	4.301	0.0020289	0.0132372	up	NW_018743813.1	2886328	2890796	+	LOC110685432	--	--	--	--	--	--	--	--
gene-LOC110685488	0.08	0	0.08	0	1.37	2.01	1	0	1	0	19	24	28.122	4.814	0.00679886	0.0332296	up	NW_018743815.1	6353	7279	+	LOC110685488	--	--	uncharacterized protein LOC110685488 [Chenopodium quinoa]	--	SubName: Full=Uncharacterized protein {ECO:0000313|EMBL:KMT11885.1};	--	--	--
gene-LOC110685524	927.09	630.01	917.72	1099.99	1526.55	1725.54	29406	20886	30280	35565	55598	53869	2.296	1.199	0.000223453	0.00229346	up	NW_018743828.1	741766	744801	-	LOC110685524	--	K05298 glyceraldehyde-3-phosphate dehydrogenase (NADP+) (phosphorylating) [EC:1.2.1.13] | (RefSeq) glyceraldehyde-3-phosphate dehydrogenase B, chloroplastic (A)	glyceraldehyde-3-phosphate dehydrogenase B, chloroplastic [Chenopodium quinoa]	RecName: Full=Glyceraldehyde-3-phosphate dehydrogenase B, chloroplastic; EC=1.2.1.13; AltName: Full=NADP-dependent glyceraldehydephosphate dehydrogenase subunit B; Flags: Precursor;	RecName: Full=Glyceraldehyde-3-phosphate dehydrogenase {ECO:0000256|RuleBase:RU361160}; EC=1.2.1.- {ECO:0000256|RuleBase:RU361160};	Glyceraldehyde 3-phosphate dehydrogenase	GO:0009507,chloroplast; GO:0047100,glyceraldehyde-3-phosphate dehydrogenase (NADP+) (phosphorylating) activity; GO:0051287,NAD binding; GO:0050661,NADP binding; GO:0006006,glucose metabolic process; GO:0019253,reductive pentose-phosphate cycle	Glyceraldehyde 3-phosphate dehydrogenase, C-terminal domain
gene-LOC110685529	0.28	0.31	0.21	0.44	0.52	0.57	13	15	10	21	28	26	2.549	1.35	0.00947224	0.0427419	up	NW_018743828.1	820796	826902	+	LOC110685529	--	K08472 mlo protein | (RefSeq) MLO-like protein 9 (A)	MLO-like protein 9 [Chenopodium quinoa]	RecName: Full=MLO-like protein 5; Short=AtMlo5;	RecName: Full=MLO-like protein {ECO:0000256|RuleBase:RU280816};	--	GO:0016021,integral component of membrane; GO:0005886,plasma membrane; GO:0005516,calmodulin binding; GO:0006952,defense response; GO:0009607,response to biotic stimulus	Mlo family
gene-LOC110685539	0.16	0.22	0.19	0.14	0.58	2.66	10	14	12	9	41	160	8.094	3.017	0.00118976	0.00874009	up	NW_018743828.1	970837	974537	-	LOC110685539	--	K08176 MFS transporter, PHS family, inorganic phosphate transporter | (RefSeq) probable inorganic phosphate transporter 1-8 (A)	probable inorganic phosphate transporter 1-8 [Chenopodium quinoa]	RecName: Full=Probable inorganic phosphate transporter 1-9; Short=AtPht1;9; AltName: Full=H(+)/Pi cotransporter;	SubName: Full=Uncharacterized protein {ECO:0000313|EMBL:KNA17198.1};	Inorganic phosphate transporter	GO:0005887,integral component of plasma membrane; GO:0005886,plasma membrane; GO:0015415,ATPase-coupled phosphate ion transmembrane transporter activity; GO:0015114,phosphate ion transmembrane transporter activity; GO:0015293,symporter activity; GO:1901684,arsenate ion transmembrane transport; GO:0006817,phosphate ion transport	Sugar (and other) transporter
gene-LOC110685605	0.37	0	0.36	1.28	0.63	1.41	14	0	14	49	27	52	5.612	2.489	0.00941229	0.042553	up	NW_018743850.1	708065	711728	-	LOC110685605	--	--	transcription factor bHLH18-like [Chenopodium quinoa]	RecName: Full=Transcription factor bHLH25; AltName: Full=Basic helix-loop-helix protein 25; Short=AtbHLH25; Short=bHLH 25; AltName: Full=Transcription factor EN 29; AltName: Full=bHLH transcription factor bHLH025;	SubName: Full=Uncharacterized protein {ECO:0000313|EMBL:KNA18362.1};	--	GO:0005634,nucleus; GO:0003677,DNA binding; GO:0003700,DNA-binding transcription factor activity; GO:0046983,protein dimerization activity; GO:0006355,regulation of transcription, DNA-templated; GO:0006351,transcription, DNA-templated	--
gene-LOC110685634	16.87	13.12	20.77	70.34	121.72	60.16	562	457	720	2389	4657	1973	6.474	2.695	1.2181e-12	9.64189e-11	up	NW_018743850.1	4428047	4429836	-	LOC110685634	--	--	--	--	--	--	--	--
gene-LOC110685661	1.18	1.06	2.44	2.25	4.65	4.22	33	31	71	64	149	116	3.102	1.633	0.00218392	0.0139775	up	NW_018743850.1	3393274	3394773	+	LOC110685661	--	K15078 structure-specific endonuclease subunit SLX1 [EC:3.6.1.-] | (RefSeq) putative disease resistance protein RGA1 (A)	putative disease resistance protein RGA3 [Chenopodium quinoa]	RecName: Full=Disease resistance protein RGA2; AltName: Full=Blight resistance protein RPI; AltName: Full=RGA2-blb;	SubName: Full=Uncharacterized protein {ECO:0000313|EMBL:KJB30692.1};	Apoptotic ATPase	GO:0043531,ADP binding; GO:0005524,ATP binding; GO:0006952,defense response	NB-ARC domain
gene-LOC110685742	0.64	0.94	0.33	1.93	1.18	1.24	19	29	10	58	40	36	2.972	1.572	0.00125031	0.00908773	up	NW_018743850.1	13124	14926	+	LOC110685742	--	K17710 pentatricopeptide repeat domain-containing protein 1 | (RefSeq) pentatricopeptide repeat-containing protein At2g18940, chloroplastic (A)	pentatricopeptide repeat-containing protein At5g67570, chloroplastic-like [Chenopodium quinoa]	RecName: Full=Pentatricopeptide repeat-containing protein At5g67570, chloroplastic; AltName: Full=Protein DELAYED GREENING 1; AltName: Full=Protein EMBRYO DEFECTIVE 1408; Flags: Precursor;	SubName: Full=Uncharacterized protein {ECO:0000313|EMBL:KNA08688.1};	FOG: PPR repeat	GO:0009507,chloroplast; GO:0004519,endonuclease activity; GO:0003723,RNA binding; GO:0009658,chloroplast organization; GO:0009451,RNA modification; GO:0042793,plastid transcription	PPR repeat family
gene-LOC110685759	5	1.1	4.59	10.65	25.87	24.32	65	15	62	141	386	311	7.398	2.887	3.89808e-06	7.6456e-05	up	NW_018743850.1	184405	185488	+	LOC110685759	--	--	phytosulfokines 3-like [Chenopodium quinoa]	RecName: Full=Phytosulfokines 3; Short=AtPSK3; Contains: RecName: Full=Phytosulfokine-alpha; Short=PSK-alpha; Short=Phytosulfokine-a; Contains: RecName: Full=Phytosulfokine-beta; Short=PSK-beta; Short=Phytosulfokine-b; Flags: Precursor;	SubName: Full=Phytosulfokine-alpha peptide {ECO:0000313|EMBL:CAK22422.1};	--	GO:0031012,extracellular matrix; GO:0005794,Golgi apparatus; GO:0008083,growth factor activity; GO:0030154,cell differentiation; GO:0008283,cell proliferation; GO:0007275,multicellular organism development	Phytosulfokine precursor protein (PSK)
gene-LOC110685763	5.66	6.36	5.11	6.69	13.42	21.71	132	155	124	159	359	498	3.284	1.715	0.000210189	0.00217629	up	NW_018743850.1	237943	241575	+	LOC110685763	--	K10878 meiotic recombination protein SPO11 | (RefSeq) DNA topoisomerase 6 subunit A-like (A)	thioredoxin-like protein AAED1, chloroplastic [Chenopodium quinoa]	RecName: Full=Thioredoxin-like protein AAED1, chloroplastic; AltName: Full=AhpC/TSA antioxidant enzyme domain-containing protein 1; Flags: Precursor;	SubName: Full=Uncharacterized protein {ECO:0000313|EMBL:KDO78865.1};	Uncharacterized conserved protein	GO:0009507,chloroplast; GO:0016209,antioxidant activity; GO:0055114,oxidation-reduction process	AhpC/TSA antioxidant enzyme
gene-LOC110685804	0	0	0	0.17	1.51	2.7	0	0	0	4	39	60	251.622	7.975	9.40687e-07	2.21659e-05	up	NW_018743850.1	650502	656017	-	LOC110685804	--	K15397 3-ketoacyl-CoA synthase [EC:2.3.1.199] | (RefSeq) 3-ketoacyl-CoA synthase 17-like (A)	protein RADIALIS-like 3 [Chenopodium quinoa]	RecName: Full=Transcription factor RADIALIS;	SubName: Full=Uncharacterized protein {ECO:0000313|EMBL:KNA12251.1};	Zuotin and related molecular chaperones (DnaJ superfamily), contains DNA-binding domains	GO:0005634,nucleus; GO:0003677,DNA binding; GO:0048262,determination of dorsal/ventral asymmetry; GO:0009908,flower development; GO:0006355,regulation of transcription, DNA-templated; GO:0006351,transcription, DNA-templated	Myb-like DNA-binding domain
gene-LOC110685814	28.23	20.41	18.8	34.11	37.22	49.71	807	610	559	994	1222	1399	2.352	1.234	3.01569e-05	0.000439386	up	NW_018743850.1	719737	723026	+	LOC110685814	--	K13699 abhydrolase domain-containing protein 5 [EC:2.3.1.51] | (RefSeq) hydrolase, alpha/beta fold family protein (A)	pheophytinase, chloroplastic-like isoform X1 [Chenopodium quinoa]	RecName: Full=Pheophytinase, chloroplastic; EC=3.1.1.-; AltName: Full=Pheophytin pheophorbide hydrolase; AltName: Full=Protein CO-REGULATED WITH NYE1; Flags: Precursor;	SubName: Full=Uncharacterized protein {ECO:0000313|EMBL:KNA06238.1};	Predicted hydrolase/acyltransferase (alpha/beta hydrolase superfamily)	GO:0009507,chloroplast; GO:0009570,chloroplast stroma; GO:0009535,chloroplast thylakoid membrane; GO:0080124,pheophytinase activity; GO:0015996,chlorophyll catabolic process	Alpha/beta hydrolase family
gene-LOC110685839	3.09	3.51	2.5	3.27	5.22	5.69	101	120	85	109	196	183	2.08	1.056	0.0027602	0.0166932	up	NW_018743850.1	945641	951627	-	LOC110685839	--	K08999 uncharacterized protein | (RefSeq) hypothetical protein (A)	bifunctional nuclease 2-like [Chenopodium quinoa]	RecName: Full=Bifunctional nuclease 2; Short=OsBBD2; EC=3.1.-.-;	SubName: Full=Uncharacterized protein {ECO:0000313|EMBL:KNA13507.1};	--	GO:0005634,nucleus; GO:0004518,nuclease activity	Bifunctional nuclease
gene-LOC110685841	1.93	1.66	4.14	4.3	6.51	7.33	51	46	114	116	198	191	3.043	1.606	0.00113326	0.0084086	up	NW_018743850.1	970003	971424	+	LOC110685841	--	K09060 plant G-box-binding factor | (RefSeq) common plant regulatory factor 1 isoform X1 (A)	bZIP transcription factor 11-like [Chenopodium quinoa]	RecName: Full=bZIP transcription factor 44 {ECO:0000305}; Short=AtbZIP44 {ECO:0000303|PubMed:11906833};	SubName: Full=Uncharacterized protein {ECO:0000313|EMBL:KNA05678.1};	--	GO:0005634,nucleus; GO:0003700,DNA-binding transcription factor activity; GO:0046982,protein heterodimerization activity; GO:0043565,sequence-specific DNA binding; GO:0044212,transcription regulatory region DNA binding; GO:0009845,seed germination; GO:0006351,transcription, DNA-templated	bZIP transcription factor
gene-LOC110685871	0.33	0.85	0.75	2.67	1.55	2.31	6	16	14	49	32	41	4.37	2.128	4.71664e-05	0.00063811	up	NW_018743850.1	1219711	1221592	-	LOC110685871	--	K03676 glutaredoxin 3 | (RefSeq) glutaredoxin-C3-like (A)	glutaredoxin-C3-like [Chenopodium quinoa]	RecName: Full=Glutaredoxin-C3; Short=AtGrxC3;	SubName: Full=Uncharacterized protein {ECO:0000313|EMBL:KNA13331.1};	Glutaredoxin and related proteins	GO:0005794,Golgi apparatus; GO:0009055,electron transfer activity; GO:0015035,protein disulfide oxidoreductase activity; GO:0045454,cell redox homeostasis	Glutaredoxin
gene-LOC110685906	5.77	4.39	6.2	10.82	30.31	27.24	180	143	201	344	1085	836	5.56	2.475	7.49252e-08	2.36237e-06	up	NW_018743850.1	1917521	1920082	+	LOC110685906	--	--	uncharacterized protein LOC110685906 [Chenopodium quinoa]	--	SubName: Full=Uncharacterized protein {ECO:0000313|EMBL:KNA14229.1};	--	--	--
gene-LOC110685922	0.54	0.05	0.44	2.84	3.14	3.41	19	2	16	102	127	118	11.612	3.538	4.35733e-08	1.46063e-06	up	NW_018743850.1	2307007	2313794	+	LOC110685922	--	K02945 small subunit ribosomal protein S1 | (RefSeq) uncharacterized protein LOC110685922 isoform X1 (A)	uncharacterized protein LOC110685922 isoform X1 [Chenopodium quinoa]	RecName: Full=30S ribosomal protein S1, chloroplastic {ECO:0000303|PubMed:10874039}; AltName: Full=CS1; AltName: Full=Chloroplastic small ribosomal subunit protein bS1c {ECO:0000303|PubMed:28007896}; Flags: Precursor;	SubName: Full=Uncharacterized protein {ECO:0000313|EMBL:KNA19506.1};	--	GO:0009507,chloroplast; GO:0005840,ribosome; GO:0003723,RNA binding	S1 RNA binding domain
gene-LOC110685927	2.41	2.53	3.31	4.17	8	5.95	21	23	30	37	80	51	2.902	1.537	0.00138997	0.00990376	up	NW_018742292.1	1301872	1302490	+	LOC110685927	--	--	--	--	--	--	--	--
gene-LOC110685930	37.45	21.85	41.06	42.93	75.7	80.87	925	564	1055	1081	2147	1966	2.598	1.377	0.000750989	0.00604539	up	NW_018743850.1	2452803	2457223	-	LOC110685930	--	--	NAD(P)H-quinone oxidoreductase subunit M, chloroplastic-like [Chenopodium quinoa]	RecName: Full=NAD(P)H-quinone oxidoreductase subunit M, chloroplastic {ECO:0000305}; EC=1.6.5.- {ECO:0000305}; AltName: Full=NAD(P)H dehydrogenase subunit M {ECO:0000305}; Short=NDH subunit M {ECO:0000305}; Short=NDH-M {ECO:0000250|UniProtKB:Q2V2S7}; AltName: Full=NADH-plastoquinone oxidoreductase subunit M {ECO:0000305}; Flags: Precursor;	SubName: Full=Uncharacterized protein {ECO:0000313|EMBL:KNA12674.1};	--	GO:0009535,chloroplast thylakoid membrane; GO:0016655,oxidoreductase activity, acting on NAD(P)H, quinone or similar compound as acceptor; GO:0048038,quinone binding	Cyanobacterial and plastid NDH-1 subunit M
gene-LOC110685932	5.44	5.05	5.7	7.08	8.32	9.54	135	131	147	179	237	233	2.016	1.011	0.000339582	0.00320269	up	NW_018743850.1	2508707	2512182	+	LOC110685932	--	K22077 ganglioside-induced differentiation-associated protein 1 | (RefSeq) glutathione S-transferase TCHQD-like (A)	glutathione S-transferase TCHQD-like [Chenopodium quinoa]	RecName: Full=Glutathione S-transferase TCHQD; EC=2.5.1.18; AltName: Full=Protein tetrachlorohydroquinone dehalogenase-homolog;	SubName: Full=Uncharacterized protein {ECO:0000313|EMBL:KNA12679.1};	Uncharacterized conserved protein (Ganglioside-induced differentiation associated protein 1, GDAP1)	GO:0005737,cytoplasm; GO:0005886,plasma membrane; GO:0004364,glutathione transferase activity; GO:0006749,glutathione metabolic process; GO:0009636,response to toxic substance	Glutathione S-transferase, N-terminal domain
gene-LOC110685943	9.28	8.15	12.53	11.08	22.14	20.49	780	716	1095	949	2137	1695	2.363	1.24	0.00134417	0.00964862	up	NW_018743850.1	2767017	2776560	+	LOC110685943	--	K00858 NAD+ kinase [EC:2.7.1.23] | (RefSeq) NAD kinase 2, chloroplastic-like isoform X1 (A)	NAD kinase 2, chloroplastic-like isoform X1 [Chenopodium quinoa]	RecName: Full=NAD kinase 2, chloroplastic; Short=AtNADK-2; EC=2.7.1.23; Flags: Precursor;	SubName: Full=Uncharacterized protein {ECO:0000313|EMBL:KNA12689.1};	Predicted sugar kinase	GO:0009507,chloroplast; GO:0005524,ATP binding; GO:0005516,calmodulin binding; GO:0003951,NAD+ kinase activity; GO:0019674,NAD metabolic process; GO:0006741,NADP biosynthetic process	ATP-NAD kinase
gene-LOC110685962	0	0	0	3.06	2.52	2.55	0	0	0	211	196	170	1329.44	10.377	9.11191e-18	1.64267e-15	up	NW_018743850.1	3120696	3125819	-	LOC110685962	--	K07478 putative ATPase | (RefSeq) ATPase WRNIP1 (A)	uncharacterized protein LOC110685962 isoform X1 [Chenopodium quinoa]	--	SubName: Full=Uncharacterized protein {ECO:0000313|EMBL:KZN07522.1};	--	--	Myb/SANT-like DNA-binding domain
gene-LOC110685970	2.34	1.75	1.72	10.57	6.35	4.15	109	85	83	501	339	190	4.59	2.198	9.77509e-10	4.55824e-08	up	NW_018743850.1	3255205	3258991	+	LOC110685970	--	--	--	--	--	--	--	--
gene-LOC110685980	1.85	1.81	2.1	3.59	3.41	3.72	44	45	52	87	93	87	2.414	1.272	3.00442e-05	0.000438253	up	NW_018743850.1	3557140	3558516	-	LOC110685980	--	--	lysine-rich arabinogalactan protein 19-like [Chenopodium quinoa]	--	SubName: Full=Uncharacterized protein {ECO:0000313|EMBL:KNA16329.1};	--	--	--
gene-LOC110685988	0.92	0.73	0.49	1.41	1.74	1.41	56	46	31	87	121	84	2.799	1.485	5.49385e-05	0.000723008	up	NW_018743850.1	3643591	3656798	+	LOC110685988	--	K01301 N-acetylated-alpha-linked acidic dipeptidase [EC:3.4.17.21] | (RefSeq) probable glutamate carboxypeptidase AMP1 (A)	probable glutamate carboxypeptidase AMP1 [Chenopodium quinoa]	RecName: Full=Probable glutamate carboxypeptidase AMP1 {ECO:0000305}; EC=3.4.17.21 {ECO:0000305}; AltName: Full=Probable glutamate carboxypeptidase 2 {ECO:0000305}; AltName: Full=Probable glutamate carboxypeptidase II {ECO:0000305}; AltName: Full=Protein ALTERED MERISTEM PROGRAM 1 {ECO:0000303|PubMed:17006669}; Short=AtAMP1 {ECO:0000303|PubMed:23603279}; AltName: Full=Protein CONSTITUTIVE MORPHOG…	SubName: Full=Uncharacterized protein {ECO:0000313|EMBL:KMT15456.1};	Transferrin receptor and related proteins containing the protease-associated (PA) domain	GO:0005789,endoplasmic reticulum membrane; GO:0016021,integral component of membrane; GO:0004180,carboxypeptidase activity; GO:0046872,metal ion binding; GO:0004181,metallocarboxypeptidase activity; GO:0009793,embryo development ending in seed dormancy; GO:0009908,flower development; GO:0010305,leaf vascular tissue pattern formation; GO:0048507,meristem development; GO:0009640,photomorphogenesis;…	Transferrin receptor-like dimerisation domain
gene-LOC110685991	0.87	0.83	0.56	1.71	1.3	2.36	21	21	14	42	36	56	3.106	1.635	0.000485578	0.00425776	up	NW_018743850.1	3691259	3692555	-	LOC110685991	--	--	--	--	--	--	--	--
gene-LOC110686001	2.17	2.14	1.3	3.72	3.82	2.64	66	68	41	115	133	79	2.375	1.248	0.000179347	0.00190727	up	NW_018743850.1	3791054	3793539	-	LOC110686001	--	--	--	--	--	--	--	--
gene-LOC110686002	0.64	0.48	1.2	2.27	2.92	2.65	18	14	35	65	94	73	4.361	2.125	1.72526e-05	0.000274049	up	NW_018743850.1	3835296	3836897	-	LOC110686002	--	K00993 ethanolaminephosphotransferase [EC:2.7.8.1] | (RefSeq) uncharacterized protein LOC106453259 (A)	uncharacterized protein LOC110686002 [Chenopodium quinoa]	--	SubName: Full=Uncharacterized protein {ECO:0000313|EMBL:KNA03271.1};	--	--	Protein of unknown function (DUF1262)
gene-LOC110686017	0.03	0.14	0	1.68	3.72	3.62	1	5	0	60	150	125	74.701	6.223	6.67821e-14	6.62162e-12	up	NW_018743850.1	4374259	4378360	+	LOC110686017	--	--	--	--	--	--	--	--
gene-LOC110686021	1.96	1.26	1.38	16.34	29.45	18.63	131	88	96	1113	2259	1225	18.431	4.204	1.09242e-30	8.57502e-28	up	NW_018743850.1	4450505	4454093	-	LOC110686021	--	K23260 scopoletin glucosyltransferase [EC:2.4.1.128] | (RefSeq) scopoletin glucosyltransferase-like (A)	scopoletin glucosyltransferase-like [Chenopodium quinoa]	RecName: Full=Scopoletin glucosyltransferase; EC=2.4.1.128; AltName: Full=Phenylpropanoid:glucosyltransferase 1;	SubName: Full=Uncharacterized protein {ECO:0000313|EMBL:KNA05928.1};	UDP-glucuronosyl and UDP-glucosyl transferase	GO:0042802,identical protein binding; GO:0050275,scopoletin glucosyltransferase activity; GO:0008152,metabolic process	UDP-glucoronosyl and UDP-glucosyl transferase
gene-LOC110686024	3.26	2.36	4.57	4.85	9.42	5.59	156	118	227	236	517	263	2.542	1.346	0.00184729	0.0123452	up	NW_018743850.1	4495150	4497716	-	LOC110686024	--	--	--	--	--	--	--	--
gene-LOC110686055	1.25	1.17	1.87	7.53	1.8	1.73	41	40	64	252	68	56	3.132	1.647	0.00560108	0.0286036	up	NW_018743850.1	5215747	5221393	+	LOC110686055	--	--	uncharacterized protein LOC110686055 [Chenopodium quinoa]	--	SubName: Full=Uncharacterized protein {ECO:0000313|EMBL:KMS64530.1};	--	--	--
gene-LOC110686066	915.29	847.43	1283.75	1309.16	1965.67	2159.2	15044	14558	21949	21934	37098	34930	2.336	1.224	0.000291059	0.00283446	up	NW_018743850.1	5370899	5371974	-	LOC110686066	--	K02692 photosystem I subunit II | (RefSeq) photosystem I reaction center subunit II, chloroplastic-like (A)	photosystem I reaction center subunit II, chloroplastic-like [Chenopodium quinoa]	RecName: Full=Photosystem I reaction center subunit II, chloroplastic; AltName: Full=Photosystem I 20 kDa subunit; Short=PSI-D; Flags: Precursor;	SubName: Full=Uncharacterized protein {ECO:0000313|EMBL:KNA14997.1};	--	GO:0009535,chloroplast thylakoid membrane; GO:0009538,photosystem I reaction center; GO:0015979,photosynthesis	PsaD
gene-LOC110686070	0	0	0	10.56	9.6	6.66	0	0	0	590	604	359	3544.1	11.791	2.12907e-22	6.52188e-20	up	NW_018743850.1	5426605	5430668	+	LOC110686070	--	--	--	--	--	--	--	--
gene-LOC110686085	0.03	0.06	0.03	0.27	0.26	0.4	1	2	1	9	10	13	10.46	3.387	0.00150859	0.0105397	up	NW_018743850.1	5710971	5712880	-	LOC110686085	--	--	--	--	--	--	--	--
gene-LOC110686087	9.83	6.37	9.45	49.29	49.18	40.69	161	109	161	823	925	656	6.981	2.803	1.80986e-23	6.03468e-21	up	NW_018743850.1	5730696	5731575	+	LOC110686087	--	K02553 regulator of ribonuclease activity A | (RefSeq) uncharacterized protein LOC107262668 (A)	putative 4-hydroxy-4-methyl-2-oxoglutarate aldolase 3 [Chenopodium quinoa]	RecName: Full=Putative 4-hydroxy-4-methyl-2-oxoglutarate aldolase 3; Short=HMG aldolase 3; EC=4.1.3.17; AltName: Full=Oxaloacetate decarboxylase; Short=OAA decarboxylase; EC=4.1.1.3; AltName: Full=Regulator of ribonuclease activity homolog 3; AltName: Full=RraA-like protein 3;	RecName: Full=4-hydroxy-4-methyl-2-oxoglutarate aldolase {ECO:0000256|RuleBase:RU004338}; Short=HMG aldolase {ECO:0000256|RuleBase:RU004338}; EC=4.1.1.3 {ECO:0000256|RuleBase:RU004338}; EC=4.1.3.17 {ECO:0000256|RuleBase:RU004338}; AltName: Full=Oxaloacetate decarboxylase {ECO:0000256|RuleBase:RU004338};	--	GO:0047443,4-hydroxy-4-methyl-2-oxoglutarate aldolase activity; GO:0046872,metal ion binding; GO:0008948,oxaloacetate decarboxylase activity; GO:0008428,ribonuclease inhibitor activity; GO:0051252,regulation of RNA metabolic process	Aldolase/RraA
gene-LOC110686089	0	0	0	0.44	1.5	1.08	0	0	0	11	42	26	185.417	7.535	2.38457e-07	6.68497e-06	up	NW_018743850.1	5766605	5772481	-	LOC110686089	--	K09264 MADS-box transcription factor, plant | (RefSeq) truncated transcription factor CAULIFLOWER A-like (A)	truncated transcription factor CAULIFLOWER A-like [Chenopodium quinoa]	RecName: Full=Floral homeotic protein APETALA 1; AltName: Full=MADS C;	SubName: Full=Uncharacterized protein {ECO:0000313|EMBL:KNA23692.1};	MADS box transcription factor	GO:0005634,nucleus; GO:0003700,DNA-binding transcription factor activity; GO:0046983,protein dimerization activity; GO:0000977,RNA polymerase II regulatory region sequence-specific DNA binding; GO:0007275,multicellular organism development; GO:0045944,positive regulation of transcription by RNA polymerase II; GO:0006351,transcription, DNA-templated	K-box region
gene-LOC110686090	0.69	0.66	0.19	0.87	0.98	1.8	17	17	5	22	28	44	3.19	1.674	0.011188	0.0483417	up	NW_018743850.1	5786710	5794756	-	LOC110686090	--	K09264 MADS-box transcription factor, plant | (RefSeq) MADS-box protein CMB1-like isoform X1 (A)	MADS-box protein CMB1-like isoform X1 [Chenopodium quinoa]	RecName: Full=MADS-box protein CMB1;	SubName: Full=MADS-box protein CMB1 isoform X1 {ECO:0000313|RefSeq:XP_010260833.1, ECO:0000313|RefSeq:XP_019053922.1};	MADS box transcription factor	GO:0005634,nucleus; GO:0003700,DNA-binding transcription factor activity; GO:0046983,protein dimerization activity; GO:0000977,RNA polymerase II regulatory region sequence-specific DNA binding; GO:0045944,positive regulation of transcription by RNA polymerase II; GO:0006351,transcription, DNA-templated	K-box region
gene-LOC110686094	8.86	5.66	8.35	15.9	13.05	24.79	304	203	298	556	514	837	3.038	1.603	1.04467e-05	0.000177863	up	NW_018743850.1	5926138	5929852	-	LOC110686094	--	--	PI-PLC X domain-containing protein At5g67130-like [Chenopodium quinoa]	RecName: Full=PI-PLC X domain-containing protein At5g67130; Flags: Precursor;	SubName: Full=Uncharacterized protein {ECO:0000313|EMBL:KNA14666.1};	--	GO:0046658,anchored component of plasma membrane; GO:0005886,plasma membrane; GO:0008081,phosphoric diester hydrolase activity; GO:0006629,lipid metabolic process	Avian retrovirus envelope protein, gp85
gene-LOC110686166	17.78	19.24	22.09	45.59	109.86	97.98	483	546	624	1262	3426	2619	5.723	2.517	2.56784e-10	1.3345e-08	up	NW_018743850.1	6973887	6975945	-	LOC110686166	--	K08235 xyloglucan:xyloglucosyl transferase [EC:2.4.1.207] | (RefSeq) probable xyloglucan endotransglucosylase/hydrolase protein 6 (A)	probable xyloglucan endotransglucosylase/hydrolase protein 6 [Chenopodium quinoa]	RecName: Full=Probable xyloglucan endotransglucosylase/hydrolase protein 7; Short=At-XTH7; Short=XTH-7; EC=2.4.1.207; Flags: Precursor;	RecName: Full=Xyloglucan endotransglucosylase/hydrolase {ECO:0000256|RuleBase:RU361120}; EC=2.4.1.207 {ECO:0000256|RuleBase:RU361120};	--	GO:0048046,apoplast; GO:0005618,cell wall; GO:0004553,hydrolase activity, hydrolyzing O-glycosyl compounds; GO:0016762,xyloglucan:xyloglucosyl transferase activity; GO:0042546,cell wall biogenesis; GO:0071555,cell wall organization; GO:0010411,xyloglucan metabolic process	Glycosyl hydrolases family 16
gene-LOC110686178	0	0.18	0	0.45	0.37	0.47	0	5	0	12	11	12	9.575	3.259	0.0111535	0.0482537	up	NW_018743850.1	7199996	7202594	-	LOC110686178	--	--	putative F-box protein At3g23950 [Chenopodium quinoa]	RecName: Full=F-box protein At5g07610;	SubName: Full=Uncharacterized protein {ECO:0000313|EMBL:KNA25779.1};	--	--	F-box-like
gene-LOC110686199	5.93	3.54	6.09	10.13	8.87	7.96	295	184	315	514	507	390	2.212	1.145	0.000234748	0.00238985	up	NW_018743850.1	7419430	7422102	+	LOC110686199	--	K14494 DELLA protein | (RefSeq) DELLA protein GAI (A)	scarecrow-like protein 15 [Chenopodium quinoa]	RecName: Full=Scarecrow-like protein 15; Short=AtSCL15; AltName: Full=GRAS family protein 25; Short=AtGRAS-25;	SubName: Full=Uncharacterized protein {ECO:0000313|EMBL:KMS95202.1};	--	GO:0005634,nucleus; GO:0003700,DNA-binding transcription factor activity; GO:0043565,sequence-specific DNA binding; GO:0030154,cell differentiation; GO:0048831,regulation of shoot system development; GO:0006355,regulation of transcription, DNA-templated; GO:0006351,transcription, DNA-templated	GRAS domain family
gene-LOC110686207	14.72	17.58	4.91	30.56	33.24	29.54	418	522	145	885	1084	826	3.355	1.746	2.41795e-05	0.000364908	up	NW_018742292.1	1209895	1217464	+	LOC110686207	--	K02116 ATP synthase protein I | (RefSeq) uncharacterized protein LOC110686207 (A)	uncharacterized protein LOC110686207 [Chenopodium quinoa]	--	SubName: Full=Uncharacterized protein {ECO:0000313|EMBL:KMS99284.1};	--	GO:0009534,chloroplast thylakoid; GO:0016021,integral component of membrane; GO:0033614,chloroplast proton-transporting ATP synthase complex assembly	--
gene-LOC110686215	2.51	7.22	2.86	7.04	5.79	7.62	101	304	120	289	268	302	2.179	1.124	0.00485078	0.0256085	up	NW_018743850.1	7582761	7587513	-	LOC110686215	--	K23677 MFS transporter, Spinster family, sphingosine-1-phosphate transporter | (RefSeq) uncharacterized LOC105802280 (A)	uncharacterized protein LOC110686215 [Chenopodium quinoa]	--	SubName: Full=Uncharacterized protein {ECO:0000313|EMBL:KNA15820.1};	Sugar transporter/spinster transmembrane protein	GO:0016021,integral component of membrane; GO:0055085,transmembrane transport	Major Facilitator Superfamily
gene-LOC110686229	0.75	1.01	1.02	2.57	1.93	2.96	15	21	21	52	44	58	3.483	1.8	1.86627e-05	0.000293356	up	NW_018742292.1	1280709	1281956	+	LOC110686229	--	--	--	--	--	--	--	--
gene-LOC110686231	4.24	4.36	4.38	5.68	7.6	9.66	202	217	217	276	416	453	2.335	1.223	7.54662e-05	0.000939351	up	NW_018743850.1	7827304	7830599	-	LOC110686231	--	--	BTB/POZ domain-containing protein At3g50780-like [Chenopodium quinoa]	RecName: Full=BTB/POZ domain-containing protein At3g50780;	SubName: Full=Uncharacterized protein {ECO:0000313|EMBL:EEE90645.1};	--	GO:0016567,protein ubiquitination	BTB/POZ domain
gene-LOC110686237	1.13	1.31	0.74	4.08	5.26	4.47	38	46	26	140	203	148	5.758	2.525	4.00997e-14	4.10564e-12	up	NW_018743850.1	7897539	7902423	-	LOC110686237	--	K09874 aquaporin NIP | (RefSeq) probable aquaporin NIP5-1 (A)	probable aquaporin NIP5-1 [Chenopodium quinoa]	RecName: Full=Probable aquaporin NIP5-1; AltName: Full=NOD26-like intrinsic protein 5-1; Short=AtNIP5;1; AltName: Full=Nodulin-26-like major intrinsic protein 6; Short=NodLikeMip6; Short=Protein NLM6;	SubName: Full=Nodulin-like intrinsic protein NIP1-1 {ECO:0000313|EMBL:AAQ11826.1};	Aquaporin (major intrinsic protein family)	GO:0005887,integral component of plasma membrane; GO:0016328,lateral plasma membrane; GO:0005886,plasma membrane; GO:0046715,active borate transmembrane transporter activity; GO:0015105,arsenite transmembrane transporter activity; GO:0015250,water channel activity; GO:0015700,arsenite transport; GO:0046713,borate transport; GO:0080029,cellular response to boron-containing substance levels; GO:004…	Major intrinsic protein
gene-LOC110686276	0.29	0.14	0.23	0.41	0.98	0.59	18	9	15	26	69	36	3.929	1.974	0.00117924	0.00867968	up	NW_018743850.1	2389529	2397181	-	LOC110686276	--	K23872 putative homogalacturonan methyltransferase [EC:2.1.1.-] | (RefSeq) hypothetical protein (A)	probable methyltransferase PMT10 [Chenopodium quinoa]	RecName: Full=Probable methyltransferase PMT10; EC=2.1.1.-;	SubName: Full=Uncharacterized protein {ECO:0000313|EMBL:KNA19514.1};	--	GO:0005737,cytoplasm; GO:0000139,Golgi membrane; GO:0016021,integral component of membrane; GO:0008757,S-adenosylmethionine-dependent methyltransferase activity; GO:0032259,methylation	Putative S-adenosyl-L-methionine-dependent methyltransferase
gene-LOC110686354	3.2	3.17	4.29	3.9	6.03	8.4	203	210	283	252	439	524	2.266	1.18	0.00243981	0.0152323	up	NW_018743858.1	65559	69283	-	LOC110686354	--	K00924 kinase [EC:2.7.1.-] | (RefSeq) receptor-like protein kinase HSL1 (A)	receptor-like protein kinase HAIKU2 [Chenopodium quinoa]	RecName: Full=Receptor-like protein kinase HAIKU2; EC=2.7.11.1; Flags: Precursor;	SubName: Full=Uncharacterized protein {ECO:0000313|EMBL:KMS95158.1};	--	GO:0016021,integral component of membrane; GO:0005524,ATP binding; GO:0004674,protein serine/threonine kinase activity; GO:0009960,endosperm development	Protein kinase domain
gene-LOC110686376	0	0	0	8.19	7.2	9.65	0	0	0	203	201	231	1480.49	10.532	5.56381e-18	1.02761e-15	up	NW_018743858.1	1109949	1117228	-	LOC110686376	--	K22522 cytokinin riboside 5'-monophosphate phosphoribohydrolase [EC:3.2.2.-] | (RefSeq) probable cytokinin riboside 5'-monophosphate phosphoribohydrolase LOGL10 isoform X1 (A)	probable cytokinin riboside 5'-monophosphate phosphoribohydrolase LOGL10 isoform X1 [Chenopodium quinoa]	RecName: Full=Cytokinin riboside 5'-monophosphate phosphoribohydrolase LOG7; EC=3.2.2.n1; AltName: Full=Protein LONELY GUY 7;	RecName: Full=Cytokinin riboside 5'-monophosphate phosphoribohydrolase {ECO:0000256|RuleBase:RU363015}; EC=3.2.2.n1 {ECO:0000256|RuleBase:RU363015};	--	GO:0005829,cytosol; GO:0005634,nucleus; GO:0016787,hydrolase activity; GO:0009691,cytokinin biosynthetic process	Possible lysine decarboxylase
gene-LOC110686384	8.04	9.85	10.11	14.13	23.43	21.87	482	617	630	863	1612	1290	2.815	1.493	1.29174e-06	2.93195e-05	up	NW_018743858.1	1687465	1695196	+	LOC110686384	--	--	J domain-containing protein required for chloroplast accumulation response 1-like [Chenopodium quinoa]	RecName: Full=J domain-containing protein required for chloroplast accumulation response 1;	SubName: Full=Uncharacterized protein {ECO:0000313|EMBL:KNA06274.1};	Auxilin-like protein and related proteins containing DnaJ domain	GO:0005737,cytoplasm; GO:0031982,vesicle; GO:0007015,actin filament organization; GO:0071483,cellular response to blue light; GO:0009904,chloroplast accumulation movement; GO:0009903,chloroplast avoidance movement; GO:0006898,receptor-mediated endocytosis	DnaJ domain
gene-LOC110686389	0.71	1	1.05	2.42	1.66	0.88	28	41	43	97	75	34	2.292	1.197	0.00768783	0.0365597	up	NW_018743858.1	2074259	2076371	+	LOC110686389	--	--	proteoglycan 4-like [Chenopodium quinoa]	--	SubName: Full=Uncharacterized protein {ECO:0000313|EMBL:KNA06300.1};	--	--	--
gene-LOC110686426	7.9	6.57	14.15	18.13	30.04	23.3	499	434	930	1168	2180	1449	3.241	1.697	3.3585e-05	0.000480598	up	NW_018743858.1	3698115	3702209	-	LOC110686426	--	K09873 aquaporin TIP | (RefSeq) aquaporin TIP2-1-like (A)	LOW QUALITY PROTEIN: probable disease resistance protein At4g33300 [Chenopodium quinoa]	RecName: Full=Probable disease resistance protein At4g33300;	SubName: Full=Uncharacterized protein {ECO:0000313|EMBL:KNA09243.1};	--	GO:0048046,apoplast; GO:0043531,ADP binding; GO:0005524,ATP binding; GO:0042742,defense response to bacterium	NB-ARC domain
gene-LOC110686436	3.62	4.97	3.82	8.77	6.05	5.22	112	161	123	277	215	159	2.087	1.061	1.70893e-05	0.000272028	up	NW_018743858.1	4680460	4682618	-	LOC110686436	--	--	uncharacterized protein LOC110686436 [Chenopodium quinoa]	--	SubName: Full=Uncharacterized protein {ECO:0000313|EMBL:KNA11044.1};	--	--	Domain of unknown function (DUF4201)
gene-LOC110686448	103.03	75.57	150.62	146.7	242.45	199.27	1285	985	1954	1865	3472	2446	2.324	1.216	0.00154118	0.0107245	up	NW_018743858.1	4949454	4951633	+	LOC110686448	--	--	gibberellin-regulated protein 1-like [Chenopodium quinoa]	RecName: Full=Gibberellin-regulated protein 1; AltName: Full=GAST1 protein homolog 1; Flags: Precursor;	SubName: Full=Uncharacterized protein {ECO:0000313|EMBL:KNA07106.1};	--	GO:0005618,cell wall; GO:0005576,extracellular region; GO:0009505,plant-type cell wall; GO:0009740,gibberellic acid mediated signaling pathway; GO:0009737,response to abscisic acid; GO:0009741,response to brassinosteroid; GO:0009739,response to gibberellin; GO:0009826,unidimensional cell growth	Gibberellin regulated protein
gene-LOC110686454	0.06	0.06	0.33	0.3	1.53	1.15	6	6	33	29	168	108	8.574	3.1	0.00030951	0.0029801	up	NW_018742292.1	2452060	2459810	-	LOC110686454	--	K03320 ammonium transporter, Amt family | (RefSeq) ammonium transporter 3 member 1-like isoform X1 (A)	ammonium transporter 3 member 1-like isoform X1 [Chenopodium quinoa]	RecName: Full=Ammonium transporter 3 member 1; Short=OsAMT3;1;	RecName: Full=Ammonium transporter {ECO:0000256|RuleBase:RU362002};	Ammonia permease	GO:0016021,integral component of membrane; GO:0008519,ammonium transmembrane transporter activity	Ammonium Transporter Family
gene-LOC110686498	0.26	0.3	0.36	0.46	0.73	0.63	26	31	37	46	82	61	2.578	1.366	0.001188	0.00873056	up	NW_018743863.1	496185	504549	-	LOC110686498	--	--	--	--	--	--	--	--
gene-LOC110686612	0.59	0.03	0.09	1.57	0.99	1.54	19	1	3	52	37	49	7.373	2.882	0.00149214	0.0104577	up	NW_018743893.1	592640	594600	+	LOC110686612	--	--	transcription factor bHLH162-like [Chenopodium quinoa]	RecName: Full=Transcription factor bHLH167 {ECO:0000305}; AltName: Full=Basic helix-loop-helix protein 167 {ECO:0000305}; Short=AtbHLH167 {ECO:0000305}; Short=bHLH 167 {ECO:0000305}; AltName: Full=bHLH transcription factor bHLH167 {ECO:0000305};	SubName: Full=Uncharacterized protein {ECO:0000313|EMBL:KNA09562.1}; Flags: Fragment;	--	GO:0005737,cytoplasm; GO:0005634,nucleus; GO:0090575,RNA polymerase II transcription factor complex; GO:0003700,DNA-binding transcription factor activity; GO:0046983,protein dimerization activity; GO:0000977,RNA polymerase II regulatory region sequence-specific DNA binding; GO:0006357,regulation of transcription by RNA polymerase II; GO:0006355,regulation of transcription, DNA-templated; GO:00063…	Helix-loop-helix DNA-binding domain
gene-LOC110686616	0.08	0.03	0	0.34	0.67	0.79	3	1	0	13	29	29	23.04	4.526	1.67303e-05	0.000267105	up	NW_018743893.1	1042903	1047596	-	LOC110686616	--	--	--	--	--	--	--	--
gene-LOC110686627	7.46	8.78	8.79	13.33	20.72	26.5	225	277	276	410	718	787	3.213	1.684	9.84887e-07	2.30918e-05	up	NW_018743893.1	60438	67154	-	LOC110686627	--	K06195 ApaG protein | (RefSeq) uncharacterized protein LOC109816810 isoform X1 (A)	uncharacterized protein LOC110686627 [Chenopodium quinoa]	RecName: Full=F-box protein SKIP16; AltName: Full=SKP1-interacting partner 16;	SubName: Full=Uncharacterized protein {ECO:0000313|EMBL:KNA25754.1};	Putative Mg2+ and Co2+ transporter CorD	GO:0019005,SCF ubiquitin ligase complex; GO:0016567,protein ubiquitination	ApaG domain
gene-LOC110686643	62.87	48.39	67.28	71.52	185.5	210.05	2199	1769	2448	2550	7450	7231	3.48	1.799	6.64092e-05	0.000843957	up	NW_018743893.1	312424	333861	-	LOC110686643	--	K00099 1-deoxy-D-xylulose-5-phosphate reductoisomerase [EC:1.1.1.267] | (RefSeq) 1-deoxy-D-xylulose 5-phosphate reductoisomerase, chloroplastic-like (A)	1-deoxy-D-xylulose 5-phosphate reductoisomerase, chloroplastic-like [Chenopodium quinoa]	RecName: Full=1-deoxy-D-xylulose 5-phosphate reductoisomerase, chloroplastic; Short=1-deoxyxylulose-5-phosphate reductoisomerase; Short=DXP reductoisomerase; EC=1.1.1.267; AltName: Full=2-C-methyl-D-erythritol 4-phosphate synthase; Flags: Precursor;	SubName: Full=Uncharacterized protein {ECO:0000313|EMBL:KNA25045.1};	--	GO:0009570,chloroplast stroma; GO:0030604,1-deoxy-D-xylulose-5-phosphate reductoisomerase activity; GO:0030145,manganese ion binding; GO:0070402,NADPH binding; GO:0051484,isopentenyl diphosphate biosynthetic process, methylerythritol 4-phosphate pathway involved in terpenoid biosynthetic process; GO:0046686,response to cadmium ion	1-deoxy-D-xylulose 5-phosphate reductoisomerase
gene-LOC110686653	499.63	221.85	809.57	765.61	1171.25	1109.4	18619	8641	31383	29083	50118	40691	2.551	1.351	0.00593623	0.0298738	up	NW_018743893.1	437582	446118	-	LOC110686653	--	K13366 polyamine oxidase [EC:1.5.3.14 1.5.3.16 1.5.3.-] | (RefSeq) polyamine oxidase-like (A)	polyamine oxidase-like [Chenopodium quinoa]	RecName: Full=Polyamine oxidase; EC=1.5.3.14; EC=1.5.3.15; Flags: Precursor;	SubName: Full=Polyamine oxidase {ECO:0000313|EMBL:AAM43922.1}; EC=1.4.3.4 {ECO:0000313|EMBL:AAM43922.1};	Amine oxidase	GO:0052898,N1-acetylspermidine:oxygen oxidoreductase (propane-1,3-diamine-forming) activity; GO:0052893,N1-acetylspermine:oxygen oxidoreductase (propane-1,3-diamine-forming) activity; GO:0052897,N8-acetylspermidine:oxygen oxidoreductase (propane-1,3-diamine-forming) activity; GO:0052896,spermidine oxidase (propane-1,3-diamine-forming) activity; GO:0052900,spermine oxidase (propane-1,3-diamine-for…	Flavin containing amine oxidoreductase
gene-LOC110686656	2.31	1.89	8.29	5.26	18.4	17.04	83	71	310	193	760	603	4.252	2.088	0.00240935	0.0150897	up	NW_018743893.1	462454	468473	-	LOC110686656	--	K13366 polyamine oxidase [EC:1.5.3.14 1.5.3.16 1.5.3.-] | (RefSeq) polyamine oxidase-like (A)	polyamine oxidase-like [Chenopodium quinoa]	RecName: Full=Polyamine oxidase; EC=1.5.3.14; EC=1.5.3.15; Flags: Precursor;	SubName: Full=Polyamine oxidase {ECO:0000313|EMBL:AAM43922.1}; EC=1.4.3.4 {ECO:0000313|EMBL:AAM43922.1};	Amine oxidase	GO:0052898,N1-acetylspermidine:oxygen oxidoreductase (propane-1,3-diamine-forming) activity; GO:0052893,N1-acetylspermine:oxygen oxidoreductase (propane-1,3-diamine-forming) activity; GO:0052897,N8-acetylspermidine:oxygen oxidoreductase (propane-1,3-diamine-forming) activity; GO:0052896,spermidine oxidase (propane-1,3-diamine-forming) activity; GO:0052900,spermine oxidase (propane-1,3-diamine-for…	Flavin containing amine oxidoreductase
gene-LOC110686657	465.48	565.48	839.87	1428.38	757.88	1910.31	5580	7085	10473	17454	10432	22539	2.813	1.492	0.000150081	0.00164845	up	NW_018743893.1	549792	553755	-	LOC110686657	--	--	uncharacterized protein LOC110686657 [Chenopodium quinoa]	RecName: Full=Trypsin inhibitor 1; AltName: Full=SOTI I; AltName: Full=Trypsin inhibitor I;	SubName: Full=Uncharacterized protein {ECO:0000313|EMBL:KNA13658.1};	--	GO:0004867,serine-type endopeptidase inhibitor activity	Trypsin inhibitors 1,2 and 3
gene-LOC110686695	5.57	4.78	5.08	5.79	9.57	10.87	254	228	241	269	501	488	2.249	1.169	0.000765741	0.00614518	up	NW_018743893.1	1104941	1109501	-	LOC110686695	--	K03695 ATP-dependent Clp protease ATP-binding subunit ClpB | (RefSeq) chaperone protein ClpB1-like (A)	aluminum-activated malate transporter 9-like [Chenopodium quinoa]	RecName: Full=Aluminum-activated malate transporter 9; Short=AtALMT9;	SubName: Full=Uncharacterized protein {ECO:0000313|EMBL:KNA17284.1};	Predicted membrane protein	GO:0016021,integral component of membrane; GO:0009705,plant-type vacuole membrane; GO:0005253,anion channel activity; GO:0015140,malate transmembrane transporter activity; GO:0015743,malate transport	Aluminium activated malate transporter
gene-LOC110686706	1.64	0.71	4.06	2.75	4.72	11.62	51	23	131	87	168	355	3.844	1.943	0.00875518	0.0403619	up	NW_018743893.1	1211824	1213942	-	LOC110686706	--	K11820 N-hydroxythioamide S-beta-glucosyltransferase [EC:2.4.1.195] | (RefSeq) UDP-glycosyltransferase 74B1-like (A)	UDP-glycosyltransferase 74B1-like [Chenopodium quinoa]	RecName: Full=UDP-glycosyltransferase 74B1; EC=2.4.1.-; AltName: Full=N-hydroxythioamide S-beta-glucosyltransferase; EC=2.4.1.195; AltName: Full=Thiohydroximate S-glucosyltransferase;	SubName: Full=UDP-glucoronosyl/UDP-glucosyl transferase family protein {ECO:0000313|EMBL:EEF05696.1};	UDP-glucuronosyl and UDP-glucosyl transferase	GO:0043231,intracellular membrane-bounded organelle; GO:0080043,quercetin 3-O-glucosyltransferase activity; GO:0080044,quercetin 7-O-glucosyltransferase activity; GO:0047251,thiohydroximate beta-D-glucosyltransferase activity; GO:0102659,UDP-glucose: 4-methylthiobutylhydroximate S-glucosyltransferase activity; GO:0103100,UDP-glucose: 6-methylthiohexylhydroximate S-glucosyltransferase activity; GO…	UDP-glucoronosyl and UDP-glucosyl transferase
gene-LOC110686715	0	0	0	0.3	0.15	0.18	0	0	0	14	8	8	68.473	6.097	0.000100878	0.00118741	up	NW_018743893.1	1316465	1319251	-	LOC110686715	--	K04079 molecular chaperone HtpG | (RefSeq) F-box/kelch-repeat protein At3g06240-like (A)	F-box/kelch-repeat protein At3g23880-like [Chenopodium quinoa]	RecName: Full=F-box protein CPR1; AltName: Full=Protein CONSTITUTIVE EXPRESSER OF PR GENES 1; AltName: Full=Protein CONSTITUTIVE EXPRESSER OF PR GENES 30 {ECO:0000303|PubMed:19682297};	SubName: Full=Uncharacterized protein {ECO:0000313|EMBL:KNA20051.1};	--	GO:0005737,cytoplasm; GO:0005634,nucleus; GO:0004842,ubiquitin-protein transferase activity; GO:0031348,negative regulation of defense response; GO:0042177,negative regulation of protein catabolic process; GO:0009626,plant-type hypersensitive response; GO:0031146,SCF-dependent proteasomal ubiquitin-dependent protein catabolic process	F-box associated domain
gene-LOC110686716	61.13	46.25	74.84	135.23	108.48	107.31	2204	1743	2807	4970	4491	3808	2.456	1.296	1.18316e-06	2.71494e-05	up	NW_018743893.1	1335302	1340873	+	LOC110686716	--	K00130 betaine-aldehyde dehydrogenase [EC:1.2.1.8] | (RefSeq) betaine aldehyde dehydrogenase, chloroplastic-like (A)	betaine aldehyde dehydrogenase, chloroplastic-like [Chenopodium quinoa]	RecName: Full=Betaine aldehyde dehydrogenase, chloroplastic; Short=BADH; EC=1.2.1.8; Flags: Precursor;	SubName: Full=Betaine aldehyde dehydrogenase {ECO:0000313|EMBL:ALA65446.1};	Aldehyde dehydrogenase	GO:0009507,chloroplast; GO:0008802,betaine-aldehyde dehydrogenase activity; GO:0019285,glycine betaine biosynthetic process from choline	Aldehyde dehydrogenase family
gene-LOC110686725	1.91	1.41	2.06	3.83	4.84	6.5	75	58	84	153	218	251	3.681	1.88	5.24814e-07	1.33248e-05	up	NW_018743893.1	1503736	1506008	+	LOC110686725	--	K18875 enhanced disease susceptibility 1 protein | (RefSeq) protein EDS1L-like isoform X1 (A)	protein EDS1L-like isoform X1 [Chenopodium quinoa]	RecName: Full=Protein EDS1L {ECO:0000305}; AltName: Full=Enhanced disease susceptibility 1-like;	SubName: Full=Uncharacterized protein {ECO:0000313|EMBL:KNA15078.1};	--	GO:0005783,endoplasmic reticulum; GO:0005634,nucleus; GO:0016787,hydrolase activity; GO:0006952,defense response; GO:0006629,lipid metabolic process	Enhanced disease susceptibility 1 protein EP domain
gene-LOC110686737	17.5	23.05	22.2	169.78	164.16	102.52	297	409	392	2938	3200	1713	9.02	3.173	1.4471e-36	1.51456e-33	up	NW_018743893.1	296882	297793	+	LOC110686737	--	--	uncharacterized protein LOC110686737 [Chenopodium quinoa]	--	SubName: Full=Uncharacterized protein {ECO:0000313|EMBL:KNA25044.1};	--	--	Protein of unknown function (DUF1645)
gene-LOC110686743	0.1	0.07	0.05	3.5	1.7	1.43	4	3	2	150	82	59	40.283	5.332	5.31693e-16	7.25838e-14	up	NW_018743893.1	486220	491760	+	LOC110686743	--	--	--	--	--	--	--	--
gene-LOC110686793	0	0	0	3.77	2.21	2.43	0	0	0	53	35	33	276.835	8.113	3.59359e-10	1.82725e-08	up	NW_018743894.1	5161162	5162259	-	LOC110686793	--	--	--	--	--	--	--	--
gene-LOC110686812	4.42	3.26	0.65	5.7	9.57	5.22	92	71	14	121	229	107	3.301	1.723	0.00614154	0.0306857	up	NW_018743894.1	4870756	4872475	-	LOC110686812	--	K15255 ATP-dependent DNA helicase PIF1 [EC:3.6.4.12] | (RefSeq) ATP-dependent DNA helicase PIF2-like (A)	ATP-dependent DNA helicase PIF2-like [Chenopodium quinoa]	--	RecName: Full=ATP-dependent DNA helicase {ECO:0000256|RuleBase:RU363044}; EC=3.6.4.12 {ECO:0000256|RuleBase:RU363044};	DNA helicase PIF1/RRM3	GO:0005524,ATP binding; GO:0003678,DNA helicase activity; GO:0006310,DNA recombination; GO:0006281,DNA repair; GO:0000723,telomere maintenance	PIF1-like helicase
gene-LOC110686823	0.47	0.61	0.05	1.74	1.43	1.58	34	46	4	129	119	113	5.642	2.496	0.000118325	0.00135798	up	NW_018743894.1	505260	535578	+	LOC110686823	--	K06962 uncharacterized protein | (RefSeq) uncharacterized protein LOC110686823 (A)	uncharacterized protein LOC110686823 [Chenopodium quinoa]	--	SubName: Full=Uncharacterized protein {ECO:0000313|EMBL:OAY46633.1};	--	--	YacP-like NYN domain
gene-LOC110686827	1.78	0.99	1.54	2.93	7.07	7.12	67	39	60	112	305	263	5.25	2.392	1.26222e-06	2.87882e-05	up	NW_018743894.1	869080	871651	+	LOC110686827	--	K00521 ferric-chelate reductase [EC:1.16.1.7] | (RefSeq) ferric reduction oxidase 7, chloroplastic-like (A)	NAC domain-containing protein 43-like [Chenopodium quinoa]	RecName: Full=NAC domain-containing protein 35 {ECO:0000303|PubMed:15029955}; Short=ANAC035 {ECO:0000303|PubMed:15029955}; AltName: Full=Protein LONG VEGETATIVE PHASE 1 {ECO:0000303|PubMed:17653269}; Short=AtLOV1 {ECO:0000303|PubMed:17653269};	SubName: Full=Uncharacterized protein {ECO:0000313|EMBL:KNA20187.1};	--	GO:0005634,nucleus; GO:0003677,DNA binding; GO:0003700,DNA-binding transcription factor activity; GO:0009908,flower development; GO:0006351,transcription, DNA-templated	No apical meristem (NAM) protein
gene-LOC110686841	0	0	0	0.75	0.63	0.34	0	0	0	43	41	19	233.289	7.866	4.12261e-09	1.67564e-07	up	NW_018743894.1	3082550	3086212	-	LOC110686841	--	--	uncharacterized protein LOC110686841 [Chenopodium quinoa]	--	SubName: Full=Uncharacterized protein {ECO:0000313|EMBL:KNA03977.1}; Flags: Fragment;	--	--	--
gene-LOC110686842	0.05	0	0	2.9	4.05	3.95	1	0	0	54	85	71	251.443	7.974	2.88111e-10	1.48502e-08	up	NW_018743894.1	3106218	3108928	-	LOC110686842	--	--	--	--	--	--	--	--
gene-LOC110686848	0.06	0.07	0.01	0.11	0.38	0.16	5	6	1	9	34	12	5.944	2.572	0.00599472	0.0301231	up	NW_018743894.1	4038446	4042717	+	LOC110686848	--	--	--	--	--	--	--	--
gene-LOC110686857	4.18	3.16	0.37	5.46	10.67	6.07	142	112	13	189	416	203	3.897	1.962	0.00530075	0.0274101	up	NW_018743894.1	4865499	4868095	-	LOC110686857	--	K07466 replication factor A1 | (RefSeq) replication protein A 70 kDa DNA-binding subunit B (A)	replication protein A 70 kDa DNA-binding subunit B-like isoform X1 [Chenopodium quinoa]	RecName: Full=Replication protein A 70 kDa DNA-binding subunit B; Short=AtRPA70B; AltName: Full=AtRPA1-5; AltName: Full=Replication factor A protein 1B; AltName: Full=Replication protein A 1B; Short=AtRPA1B;	SubName: Full=Uncharacterized protein {ECO:0000313|EMBL:KNA06089.1}; Flags: Fragment;	Single-stranded DNA-binding replication protein A (RPA), large (70 kD) subunit and related ssDNA-binding proteins	GO:0005634,nucleus; GO:0003677,DNA binding; GO:0046872,metal ion binding; GO:0006310,DNA recombination; GO:0006281,DNA repair; GO:0006260,DNA replication; GO:0010224,response to UV-B	Replication factor-A C terminal domain
gene-LOC110686859	1.91	1.24	0.39	3.01	6.88	3.74	28	19	6	45	116	54	5.183	2.374	0.000250571	0.00251866	up	NW_018743894.1	4867854	4870001	-	LOC110686859	--	--	uncharacterized protein LOC110686859 [Chenopodium quinoa]	--	SubName: Full=Uncharacterized protein {ECO:0000313|EMBL:KNA06477.1}; Flags: Fragment;	--	--	--
gene-LOC110686917	0	0	0	1.85	2.57	2.38	0	0	0	74	116	92	656.548	9.359	8.21223e-14	8.00273e-12	up	NW_018743906.1	570485	575604	-	LOC110686917	--	--	--	--	--	--	--	--
gene-LOC110686922	0	0	0	0.2	1.09	0.36	0	0	0	9	56	16	187.249	7.549	1.11215e-06	2.56447e-05	up	NW_018743906.1	692713	702505	-	LOC110686922	--	--	uncharacterized protein LOC110686922 [Chenopodium quinoa]	--	SubName: Full=Uncharacterized protein {ECO:0000313|EMBL:KNA05185.1}; Flags: Fragment;	--	--	Plant transposase (Ptta/En/Spm family)
gene-LOC110686953	0	0	0	2.13	1.46	2.35	0	0	0	31	24	33	204.922	7.679	7.96766e-09	3.08536e-07	up	NW_018743906.1	1670972	1672471	+	LOC110686953	--	--	--	--	--	--	--	--
gene-LOC110686958	14.88	12.54	13.38	17.81	26.37	30.88	512	451	479	625	1042	1046	2.428	1.28	5.12502e-05	0.00068451	up	NW_018743906.1	1826383	1830212	-	LOC110686958	--	K00815 tyrosine aminotransferase [EC:2.6.1.5] | (RefSeq) probable aminotransferase TAT2 (A)	probable aminotransferase TAT2 [Chenopodium quinoa]	RecName: Full=Probable aminotransferase TAT2; EC=2.6.1.-; AltName: Full=Tyrosine aminotransferase 2;	SubName: Full=Uncharacterized protein {ECO:0000313|EMBL:KNA19805.1};	Tyrosine aminotransferase	GO:0005829,cytosol; GO:0004838,L-tyrosine:2-oxoglutarate aminotransferase activity; GO:0030170,pyridoxal phosphate binding; GO:0006572,tyrosine catabolic process; GO:0010189,vitamin E biosynthetic process	Aminotransferase class I and II
gene-LOC110686966	0	0	0	78.91	42.4	59.54	0	0	0	1614	977	1176	8664.17	13.081	2.97084e-27	1.49247e-24	up	NW_018743906.1	2010501	2011578	+	LOC110686966	--	K09286 EREBP-like factor | (RefSeq) ethylene-responsive transcription factor 11-like (A)	ethylene-responsive transcription factor 11-like [Chenopodium quinoa]	RecName: Full=Ethylene-responsive transcription factor 8; Short=AtERF8; AltName: Full=Ethylene-responsive element-binding factor 8; Short=EREBP-8;	SubName: Full=Uncharacterized protein {ECO:0000313|EMBL:KNA16822.1};	--	GO:0005634,nucleus; GO:0003677,DNA binding; GO:0003700,DNA-binding transcription factor activity; GO:0009873,ethylene-activated signaling pathway; GO:0006351,transcription, DNA-templated	AP2 domain
gene-LOC110687015	0	0	0	2.46	2.51	9.21	0	0	0	47	54	170	660.521	9.367	1.72932e-11	1.1312e-09	up	NW_018743909.1	18935	19941	-	LOC110687015	--	--	miraculin-like [Chenopodium quinoa]	RecName: Full=Miraculin; Short=MIR; Flags: Precursor;	SubName: Full=Uncharacterized protein {ECO:0000313|EMBL:KNA03096.1};	--	GO:0004866,endopeptidase inhibitor activity	Trypsin and protease inhibitor
gene-LOC110687016	0	0	0	8.63	1.97	3.26	0	0	0	140	36	51	509.66	8.993	3.25799e-11	2.0316e-09	up	NW_018743909.1	29660	30514	-	LOC110687016	--	--	miraculin-like [Chenopodium quinoa]	RecName: Full=Miraculin; Short=MIR; Flags: Precursor;	SubName: Full=Uncharacterized protein {ECO:0000313|EMBL:KNA03096.1};	--	GO:0004866,endopeptidase inhibitor activity	Trypsin and protease inhibitor
gene-LOC110687018	0.21	0	0.1	4.22	2.93	7.04	4	0	2	82	64	132	59.611	5.898	2.14897e-13	1.92783e-11	up	NW_018743909.1	38334	39356	-	LOC110687018	--	--	miraculin-like [Chenopodium quinoa]	RecName: Full=Miraculin; Short=MIR; Flags: Precursor;	SubName: Full=Uncharacterized protein {ECO:0000313|EMBL:KNA03096.1};	--	GO:0004866,endopeptidase inhibitor activity	Trypsin and protease inhibitor
gene-LOC110687019	0	0	0	6.6	0.27	0.77	0	0	0	107	5	12	268.677	8.07	2.20097e-06	4.67727e-05	up	NW_018743909.1	43422	44276	-	LOC110687019	--	--	miraculin-like [Chenopodium quinoa]	RecName: Full=Miraculin; Short=MIR; Flags: Precursor;	SubName: Full=Uncharacterized protein {ECO:0000313|EMBL:KNA03096.1};	--	GO:0004866,endopeptidase inhibitor activity	Trypsin and protease inhibitor
gene-LOC110687080	0.81	0.85	1.09	1.82	2.18	3.85	10	11	14	23	31	47	3.761	1.911	0.00102801	0.00776508	up	NW_018743919.1	2051862	2052976	+	LOC110687080	--	K04683 transcription factor Dp-1 | (RefSeq) transcription factor-like protein DPB (A)	nuclear transport factor 2-like [Chenopodium quinoa]	RecName: Full=Nuclear transport factor 2B {ECO:0000303|PubMed:16428596}; Short=AtNTF2b {ECO:0000303|PubMed:16428596}; Short=NTF-2;	SubName: Full=Nuclear transport factor 2 {ECO:0000313|EMBL:OMO76715.1};	Nuclear transport factor 2	GO:0005737,cytoplasm; GO:0005635,nuclear envelope; GO:0005634,nucleus; GO:0006606,protein import into nucleus	Nuclear transport factor 2 (NTF2) domain
gene-LOC110687099	0	0	0.02	0	0.19	0.76	0	0	1	0	12	42	69.604	6.121	0.00230072	0.0145398	up	NW_018743919.1	3571704	3574729	+	LOC110687099	--	--	--	--	--	--	--	--
gene-LOC110687162	0.03	0.07	0.02	0.08	0.67	1.15	1	3	1	3	30	44	21.216	4.407	0.000225603	0.00231174	up	NW_018743919.1	1395844	1398760	-	LOC110687162	--	--	--	--	--	--	--	--
gene-LOC110687199	29.54	23.43	57.68	57.81	211.14	173.23	193	160	392	385	1584	1114	5.278	2.4	2.47341e-05	0.000371731	up	NW_018743919.1	2589304	2589654	-	LOC110687199	--	--	uncharacterized protein LOC110687199 [Chenopodium quinoa]	--	SubName: Full=Uncharacterized protein {ECO:0000313|EMBL:KNA05467.1};	--	--	Domain of unknown function (DUF4228)
gene-LOC110687215	0.25	0.1	0.02	0.42	0.44	0.72	10	4	1	17	20	28	5.586	2.482	0.00374971	0.0210178	up	NW_018743919.1	329719	332954	-	LOC110687215	--	K00927 phosphoglycerate kinase [EC:2.7.2.3] | (RefSeq) uncharacterized LOC109182250 (A)	UDP-glycosyltransferase 86A1-like [Chenopodium quinoa]	RecName: Full=UDP-glycosyltransferase 86A1; EC=2.4.1.-;	RecName: Full=Glycosyltransferase {ECO:0000256|RuleBase:RU362057}; EC=2.4.1.- {ECO:0000256|RuleBase:RU362057};	UDP-glucuronosyl and UDP-glucosyl transferase	GO:0043231,intracellular membrane-bounded organelle; GO:0080043,quercetin 3-O-glucosyltransferase activity; GO:0080044,quercetin 7-O-glucosyltransferase activity; GO:0008152,metabolic process	UDP-glucoronosyl and UDP-glucosyl transferase
gene-LOC110687216	1.34	1.23	2.07	2.41	2.92	2.55	48	46	77	88	120	90	2.203	1.139	0.00265665	0.0162646	up	NW_018743919.1	332966	335668	-	LOC110687216	--	--	--	--	--	--	--	--
gene-LOC110687218	12.01	10.64	12.02	13.87	20.55	23.47	434	402	452	511	853	835	2.201	1.138	0.00028279	0.0027704	up	NW_018743919.1	374678	376619	+	LOC110687218	--	K03122 transcription initiation factor TFIIA large subunit | (RefSeq) uncharacterized protein LOC114825099 (A)	uncharacterized protein LOC110687218 [Chenopodium quinoa]	--	SubName: Full=Uncharacterized protein {ECO:0000313|EMBL:KNA05599.1};	--	--	PB1 domain
gene-LOC110687233	0.02	0.07	0.02	0.09	0.2	0.25	1	4	1	5	12	13	6.729	2.75	0.0111253	0.0481958	up	NW_018743919.1	642208	646183	+	LOC110687233	--	K06883 uncharacterized protein | (RefSeq) LOW QUALITY PROTEIN: uncharacterized protein LOC104799061 (A)	G-type lectin S-receptor-like serine/threonine-protein kinase B120 [Chenopodium quinoa]	RecName: Full=G-type lectin S-receptor-like serine/threonine-protein kinase B120; EC=2.7.11.1; Flags: Precursor;	SubName: Full=Pkinase domain-containing protein/S_locus_glycop domain-containing protein/B_lectin domain-containing protein/Pkinase_Tyr domain-containing protein/PAN_2 domain-containing protein/DUF3403 domain-conta... {ECO:0000313|EMBL:GAV67414.1};	--	GO:0016021,integral component of membrane; GO:0005886,plasma membrane; GO:0005524,ATP binding; GO:0005516,calmodulin binding; GO:0030246,carbohydrate binding; GO:0004674,protein serine/threonine kinase activity; GO:0006468,protein phosphorylation; GO:0048544,recognition of pollen	Protein tyrosine kinase
gene-LOC110687236	0.68	0.89	0.86	1.83	2.42	1.28	41	56	54	112	167	76	2.978	1.574	2.10238e-05	0.000324379	up	NW_018743919.1	663122	672193	+	LOC110687236	--	K20606 mitogen-activated protein kinase kinase kinase ANP1 [EC:2.7.11.25] | (RefSeq) receptor-like serine/threonine-protein kinase SD1-7 isoform X1 (A)	receptor-like serine/threonine-protein kinase SD1-8 [Chenopodium quinoa]	RecName: Full=Receptor-like serine/threonine-protein kinase SD1-8; EC=2.7.11.1; AltName: Full=Arabidopsis thaliana receptor kinase 3; AltName: Full=S-domain-1 (SD1) receptor kinase 8; Short=SD1-8; Flags: Precursor;	SubName: Full=Brassica self-incompatibility locus family protein {ECO:0000313|EMBL:EEE85477.1};	--	GO:0016021,integral component of membrane; GO:0005886,plasma membrane; GO:0009506,plasmodesma; GO:0005773,vacuole; GO:0005524,ATP binding; GO:0030246,carbohydrate binding; GO:0004674,protein serine/threonine kinase activity; GO:0004675,transmembrane receptor protein serine/threonine kinase activity; GO:0031625,ubiquitin protein ligase binding; GO:0006468,protein phosphorylation; GO:0048544,recogn…	Protein tyrosine kinase
gene-LOC110687242	0.25	0.21	0.36	0.46	0.47	0.47	46	41	69	85	99	85	2.18	1.124	0.00227805	0.0144208	up	NW_018743919.1	790536	800593	-	LOC110687242	--	--	--	--	--	--	--	--
gene-LOC110687247	1.7	1.42	2.24	7.22	14.4	21.21	32	28	44	139	312	394	10.59	3.405	9.94478e-12	6.82512e-10	up	NW_018743919.1	840179	842060	+	LOC110687247	--	--	23 kDa jasmonate-induced protein-like [Chenopodium quinoa]	RecName: Full=23 kDa jasmonate-induced protein;	SubName: Full=Uncharacterized protein {ECO:0000313|EMBL:KMS94989.1};	--	--	--
gene-LOC110687256	0.32	0.36	0.43	0.53	2.07	7.73	10	12	14	17	75	240	12.632	3.659	2.31514e-05	0.000352444	up	NW_018743919.1	929185	930878	+	LOC110687256	--	K10260 F-box and WD-40 domain protein 7 | (RefSeq) WD40/YVTN repeat-like-containing domain (A)	U-box domain-containing protein 20-like [Chenopodium quinoa]	RecName: Full=U-box domain-containing protein 20; EC=2.3.2.27; AltName: Full=Plant U-box protein 20; AltName: Full=RING-type E3 ubiquitin transferase PUB20 {ECO:0000305};	RecName: Full=RING-type E3 ubiquitin transferase {ECO:0000256|SAAS:SAAS00702733}; EC=2.3.2.27 {ECO:0000256|SAAS:SAAS00702733};	--	GO:0004842,ubiquitin-protein transferase activity; GO:0010200,response to chitin	U-box domain
gene-LOC110687271	737.25	648.11	982.16	1120.59	1570.71	1578.94	12502	11487	17325	19370	30584	26353	2.354	1.235	7.6384e-05	0.000947956	up	NW_018743919.1	1218976	1220482	-	LOC110687271	--	K08901 photosystem II oxygen-evolving enhancer protein 3 | (RefSeq) oxygen-evolving enhancer protein 3, chloroplastic (A)	oxygen-evolving enhancer protein 3, chloroplastic [Chenopodium quinoa]	RecName: Full=Oxygen-evolving enhancer protein 3, chloroplastic; Short=OEE3; AltName: Full=16 kDa subunit of oxygen evolving system of photosystem II; AltName: Full=OEC 16 kDa subunit; Flags: Precursor;	SubName: Full=Uncharacterized protein {ECO:0000313|EMBL:KNA09121.1};	--	GO:0009535,chloroplast thylakoid membrane; GO:0019898,extrinsic component of membrane; GO:0009654,photosystem II oxygen evolving complex; GO:0005509,calcium ion binding; GO:0015979,photosynthesis	Oxygen evolving enhancer protein 3 (PsbQ)
gene-LOC110687280	1.93	2.84	2.36	4.17	8.08	8.05	183	282	233	404	882	753	3.826	1.936	1.06509e-07	3.2357e-06	up	NW_018743919.1	1345782	1368242	+	LOC110687280	--	K20606 mitogen-activated protein kinase kinase kinase ANP1 [EC:2.7.11.25] | (RefSeq) receptor-like serine/threonine-protein kinase SD1-7 isoform X1 (A)	putative receptor-like protein kinase At4g00960 isoform X2 [Chenopodium quinoa]	RecName: Full=Cysteine-rich receptor-like protein kinase 10; Short=Cysteine-rich RLK10; EC=2.7.11.-; AltName: Full=Receptor-like protein kinase 4; Flags: Precursor;	SubName: Full=Uncharacterized protein {ECO:0000313|EMBL:ESW15154.1};	--	GO:0016021,integral component of membrane; GO:0005886,plasma membrane; GO:0005524,ATP binding; GO:0004674,protein serine/threonine kinase activity; GO:0042742,defense response to bacterium; GO:0006468,protein phosphorylation	Protein kinase domain
gene-LOC110687286	2.61	1.86	1.11	11.7	11.76	8.13	113	84	50	516	584	346	7.378	2.883	1.8491e-16	2.68997e-14	up	NW_018743919.1	1376228	1379292	+	LOC110687286	--	--	--	--	--	--	--	--
gene-LOC110687295	0.04	0.04	0.04	0.25	0.38	0.92	1	1	1	6	10	21	16.404	4.036	0.000965118	0.00740178	up	NW_018743919.1	1477851	1480072	+	LOC110687295	--	--	cysteine-rich receptor-like protein kinase 15 [Chenopodium quinoa]	RecName: Full=Cysteine-rich receptor-like protein kinase 8; Short=Cysteine-rich RLK8; EC=2.7.11.-; Flags: Precursor;	SubName: Full=cysteine-rich receptor-like protein kinase 25 {ECO:0000313|RefSeq:XP_016681094.1};	--	GO:0016021,integral component of membrane; GO:0005886,plasma membrane; GO:0005524,ATP binding; GO:0004674,protein serine/threonine kinase activity; GO:0042742,defense response to bacterium; GO:0006468,protein phosphorylation	Salt stress response/antifungal
gene-LOC110687300	1.36	0.28	0.17	5.16	5.79	7.41	70	15	9	271	343	376	13.23	3.726	5.27277e-08	1.73357e-06	up	NW_018743919.1	1830377	1834642	-	LOC110687300	--	K06883 uncharacterized protein | (RefSeq) LOW QUALITY PROTEIN: uncharacterized protein LOC104799061 (A)	cysteine-rich receptor-like protein kinase 25 [Chenopodium quinoa]	RecName: Full=Cysteine-rich receptor-like protein kinase 25; Short=Cysteine-rich RLK25; EC=2.7.11.-; Flags: Precursor;	SubName: Full=Uncharacterized protein {ECO:0000313|EMBL:KDO37422.1};	--	GO:0016021,integral component of membrane; GO:0005886,plasma membrane; GO:0005524,ATP binding; GO:0004674,protein serine/threonine kinase activity; GO:0042742,defense response to bacterium; GO:0006468,protein phosphorylation	Protein tyrosine kinase
gene-LOC110687301	15.88	12.01	28.37	34.41	67.39	45.66	1166	922	2167	2576	5682	3300	3.407	1.768	7.0424e-05	0.00088625	up	NW_018743919.1	1618219	1624024	-	LOC110687301	--	K06883 uncharacterized protein | (RefSeq) LOW QUALITY PROTEIN: uncharacterized protein LOC104799061 (A)	cysteine-rich receptor-like protein kinase 10 isoform X1 [Chenopodium quinoa]	RecName: Full=Cysteine-rich receptor-like protein kinase 10; Short=Cysteine-rich RLK10; EC=2.7.11.-; AltName: Full=Receptor-like protein kinase 4; Flags: Precursor;	SubName: Full=Uncharacterized protein {ECO:0000313|EMBL:CCB52206.1};	--	GO:0016021,integral component of membrane; GO:0005886,plasma membrane; GO:0005524,ATP binding; GO:0004674,protein serine/threonine kinase activity; GO:0042742,defense response to bacterium; GO:0006468,protein phosphorylation	Protein tyrosine kinase
gene-LOC110687305	0.09	0.11	0.54	14.48	22.94	22.82	3	4	19	501	894	762	105.193	6.717	3.69581e-29	2.32084e-26	up	NW_018743919.1	1807909	1812622	-	LOC110687305	--	K06883 uncharacterized protein | (RefSeq) LOW QUALITY PROTEIN: uncharacterized protein LOC104799061 (A)	putative receptor-like protein kinase At4g00960 [Chenopodium quinoa]	RecName: Full=Cysteine-rich receptor-like protein kinase 10; Short=Cysteine-rich RLK10; EC=2.7.11.-; AltName: Full=Receptor-like protein kinase 4; Flags: Precursor;	SubName: Full=Uncharacterized protein {ECO:0000313|EMBL:KJB68593.1};	--	GO:0016021,integral component of membrane; GO:0005886,plasma membrane; GO:0005524,ATP binding; GO:0004674,protein serine/threonine kinase activity; GO:0042742,defense response to bacterium; GO:0006468,protein phosphorylation	Protein tyrosine kinase
gene-LOC110687317	2.28	0.53	3.4	7.97	20.93	6.98	95	23	147	338	1000	286	7.429	2.893	2.77458e-05	0.000409161	up	NW_018743919.1	1953572	1957239	-	LOC110687317	--	--	--	--	--	--	--	--
gene-LOC110687318	1.11	1.3	1.2	2.29	1.55	1.82	53	65	60	112	85	86	2.025	1.018	0.000229776	0.00234685	up	NW_018743919.1	1960324	1967407	-	LOC110687318	--	K20890 xylan alpha-glucuronosyltransferase [EC:2.4.1.-] | (RefSeq) UDP-glucuronate:xylan alpha-glucuronosyltransferase 1-like (A)	ankyrin repeat-containing protein ITN1-like [Chenopodium quinoa]	RecName: Full=Ankyrin repeat-containing protein ITN1; AltName: Full=Protein INCREASED TOLERANCE TO NACL {ECO:0000303|PubMed:18643991};	SubName: Full=Uncharacterized protein {ECO:0000313|EMBL:KMS96652.1};	FOG: Ankyrin repeat	GO:0016021,integral component of membrane; GO:0005634,nucleus; GO:0005886,plasma membrane; GO:0034613,cellular protein localization; GO:0009651,response to salt stress; GO:0007165,signal transduction	Domain of unknown function
gene-LOC110687322	0.03	0.16	0.13	1.25	0.57	0.7	1	5	4	39	20	21	10.195	3.35	9.92298e-06	0.000170254	up	NW_018743919.1	2001457	2004376	+	LOC110687322	--	K02183 calmodulin | (RefSeq) calmodulin-like (A)	uncharacterized protein LOC110687322 [Chenopodium quinoa]	RecName: Full=Calmodulin; Short=CaM;	SubName: Full=Uncharacterized protein {ECO:0000313|EMBL:KNA15067.1};	Calmodulin and related proteins (EF-Hand superfamily)	GO:0005737,cytoplasm; GO:0005509,calcium ion binding; GO:0019904,protein domain specific binding	EF-hand domain pair
gene-LOC110687327	4.79	1.93	8.44	6.83	15.6	14.41	126	53	231	183	471	373	3.142	1.652	0.00565296	0.0287905	up	NW_018743919.1	2083172	2085437	+	LOC110687327	--	K03188 urease accessory protein | (RefSeq) uncharacterized protein LOC108224146 isoform X1 (A)	protein PHLOEM PROTEIN 2-LIKE A1-like [Chenopodium quinoa]	RecName: Full=Protein PHLOEM PROTEIN 2-LIKE A1; Short=AtPP2-A1;	SubName: Full=protein PHLOEM PROTEIN 2-LIKE A1-like {ECO:0000313|RefSeq:XP_018813259.1};	--	GO:0030246,carbohydrate binding; GO:0043394,proteoglycan binding; GO:0009625,response to insect	Phloem protein 2
gene-LOC110687356	34.29	29.76	35.2	39.04	56.05	64.64	1389	1260	1483	1612	2607	2577	2.117	1.082	0.000361401	0.00335639	up	NW_018743919.1	2432090	2439663	+	LOC110687356	--	K09015 Fe-S cluster assembly protein SufD | (RefSeq) protein ABCI7, chloroplastic (A)	UPF0051 protein ABCI8, chloroplastic-like [Chenopodium quinoa]	RecName: Full=UPF0051 protein ABCI8, chloroplastic; AltName: Full=ABC transporter I family member 8; Short=ABC transporter ABCI.8; Short=AtABCI8; AltName: Full=Non-intrinsic ABC protein 1; Short=Protein ABC1; AltName: Full=Plastid sufB-like protein; AltName: Full=Protein LONG AFTER FAR-RED 6; Flags: Precursor;	SubName: Full=Uncharacterized protein {ECO:0000313|EMBL:KNA18718.1};	--	GO:0009507,chloroplast; GO:0009570,chloroplast stroma; GO:0042626,ATPase activity, coupled to transmembrane movement of substances; GO:0005215,transporter activity; GO:0006879,cellular iron ion homeostasis; GO:0016226,iron-sulfur cluster assembly; GO:2000030,regulation of response to red or far red light	Uncharacterized protein family (UPF0051)
gene-LOC110687357	1.76	1.03	0.66	5.71	4.6	7.78	23	14	9	76	69	100	6.86	2.778	1.80684e-08	6.5334e-07	up	NW_018743919.1	2463073	2463774	+	LOC110687357	--	--	uncharacterized protein LOC110687357 [Chenopodium quinoa]	--	SubName: Full=Uncharacterized protein {ECO:0000313|EMBL:KJB57727.1};	--	--	--
gene-LOC110687365	2.12	1.5	0.91	4.16	2.8	7.18	54	40	24	108	82	180	4.099	2.035	4.56385e-05	0.000621758	up	NW_018743919.1	2616187	2617555	+	LOC110687365	--	K20855 beta-1,3-galactosyltransferase 1/2/3/4/5/7/8 [EC:2.4.1.-] | (RefSeq) probable beta-1,3-galactosyltransferase 2 (A)	uncharacterized protein LOC110687365 [Chenopodium quinoa]	--	SubName: Full=Uncharacterized protein {ECO:0000313|EMBL:KNA24128.1};	--	--	Senescence regulator
gene-LOC110687371	267.99	192.52	294.59	368.44	540.94	603.97	8176	6139	9349	11458	18950	18136	2.619	1.389	3.7907e-05	0.000531545	up	NW_018743919.1	2731304	2732942	+	LOC110687371	--	K02115 F-type H+-transporting ATPase subunit gamma | (RefSeq) ATP synthase gamma chain, chloroplastic-like (A)	ATP synthase gamma chain, chloroplastic-like [Chenopodium quinoa]	RecName: Full=ATP synthase gamma chain, chloroplastic; AltName: Full=F-ATPase gamma subunit; Flags: Precursor;	SubName: Full=Uncharacterized protein {ECO:0000313|EMBL:KNA09180.1};	F0F1-type ATP synthase, gamma subunit	GO:0009535,chloroplast thylakoid membrane; GO:0045261,proton-transporting ATP synthase complex, catalytic core F(1); GO:0046933,proton-transporting ATP synthase activity, rotational mechanism; GO:0015986,ATP synthesis coupled proton transport	ATP synthase
gene-LOC110687384	154.57	120.99	164.88	337.18	355	129.54	5904	4830	6551	13128	15570	4870	2.384	1.254	0.00136926	0.00978958	up	NW_018743919.1	2870580	2873883	+	LOC110687384	--	K05907 adenylyl-sulfate reductase (glutathione) [EC:1.8.4.9] | (RefSeq) 5'-adenylylsulfate reductase 1, chloroplastic-like (A)	5'-adenylylsulfate reductase 1, chloroplastic-like [Chenopodium quinoa]	RecName: Full=5'-adenylylsulfate reductase 1, chloroplastic; EC=1.8.4.9; AltName: Full=3'-phosphoadenosine-5'-phosphosulfate reductase homolog 19; Short=PAPS reductase homolog 19; Short=Prh-19; AltName: Full=Adenosine 5'-phosphosulfate 5'-adenylylsulfate sulfotransferase 1; Short=APS sulfotransferase 1; AltName: Full=Thioredoxin-independent APS reductase 1; Flags: Precursor;	SubName: Full=Uncharacterized protein {ECO:0000313|EMBL:KNA10890.1};	Phosphoadenosine phosphosulfate reductase	GO:0009507,chloroplast; GO:0009570,chloroplast stroma; GO:0009536,plastid; GO:0051539,4 iron, 4 sulfur cluster binding; GO:0033741,adenylyl-sulfate reductase (glutathione) activity; GO:0009973,adenylyl-sulfate reductase activity; GO:0046872,metal ion binding; GO:0004604,phosphoadenylyl-sulfate reductase (thioredoxin) activity; GO:0045454,cell redox homeostasis; GO:0019344,cysteine biosynthetic pr…	Phosphoadenosine phosphosulfate reductase family
gene-LOC110687389	15.76	8.39	12.99	20.25	28.13	33.08	365	203	313	478	748	754	2.858	1.515	5.7679e-05	0.000752243	up	NW_018743919.1	2972927	2978228	-	LOC110687389	--	--	uncharacterized protein LOC110687389 [Chenopodium quinoa]	--	SubName: Full=Uncharacterized protein {ECO:0000313|EMBL:KNA03912.1};	--	--	--
gene-LOC110687402	13.09	12.47	15.03	17.89	21.56	25.68	749	746	895	1044	1417	1447	2.101	1.071	7.58312e-05	0.000942649	up	NW_018743919.1	3201161	3216402	-	LOC110687402	--	K21989 calcium permeable stress-gated cation channel | (RefSeq) calcium permeable stress-gated cation channel 1-like (A)	calcium permeable stress-gated cation channel 1-like [Chenopodium quinoa]	RecName: Full=Calcium permeable stress-gated cation channel 1; Short=AtCSC1;	SubName: Full=Uncharacterized protein {ECO:0000313|EMBL:KNA03663.1};	Uncharacterized conserved protein	GO:0016021,integral component of membrane; GO:0005886,plasma membrane; GO:0005227,calcium activated cation channel activity; GO:0006812,cation transport	Calcium-dependent channel, 7TM region, putative phosphate
gene-LOC110687413	1.54	1.16	1.07	1.55	2.14	2.5	80	63	58	82	128	128	2.165	1.115	0.00278547	0.0168029	up	NW_018743919.1	3348187	3355951	-	LOC110687413	--	K14012 UBX domain-containing protein 1 | (RefSeq) ATPase family gene 2 protein (A)	katanin p60 ATPase-containing subunit A1-like [Chenopodium quinoa]	RecName: Full=Katanin p60 ATPase-containing subunit A1 {ECO:0000255|HAMAP-Rule:MF_03023}; Short=Katanin p60 subunit A1 {ECO:0000255|HAMAP-Rule:MF_03023}; EC=3.6.4.3 {ECO:0000255|HAMAP-Rule:MF_03023}; AltName: Full=CAD ATPase; AltName: Full=Katanin-1; Short=Atp60; AltName: Full=Protein BOTERO 1; AltName: Full=Protein ECTOPIC ROOT HAIR 3; AltName: Full=Protein FAT ROOT; AltName: Full=Protein FRAGIL…	SubName: Full=Uncharacterized protein {ECO:0000313|EMBL:KNA05072.1}; Flags: Fragment;	AAA+-type ATPase	GO:0008352,katanin complex; GO:0005874,microtubule; GO:0005634,nucleus; GO:0005524,ATP binding; GO:0008017,microtubule binding; GO:0008568,microtubule-severing ATPase activity; GO:0043622,cortical microtubule organization; GO:0000226,microtubule cytoskeleton organization; GO:0009825,multidimensional cell growth; GO:0009832,plant-type cell wall biogenesis; GO:0010091,trichome branching	ATPase family associated with various cellular activities (AAA)
gene-LOC110687415	52.79	44.47	49.62	86.72	134.15	177.72	1355	1193	1325	2269	3954	4490	3.588	1.843	8.99964e-08	2.76581e-06	up	NW_018743919.1	3401773	3405346	-	LOC110687415	--	--	plastid-lipid-associated protein, chloroplastic-like [Chenopodium quinoa]	RecName: Full=Plastid-lipid-associated protein, chloroplastic; AltName: Full=CitPAP; Flags: Precursor;	SubName: Full=Uncharacterized protein {ECO:0000313|EMBL:KNA03961.1};	--	GO:0009507,chloroplast	PAP_fibrillin
gene-LOC110687420	10.26	9.8	8.4	18.49	23.74	21.22	543	542	462	997	1442	1105	2.935	1.553	2.28218e-11	1.46244e-09	up	NW_018743919.1	3461507	3470612	-	LOC110687420	--	K10143 E3 ubiquitin-protein ligase RFWD2 [EC:2.3.2.27] | (RefSeq) E3 ubiquitin-protein ligase COP1-like (A)	E3 ubiquitin-protein ligase COP1-like [Chenopodium quinoa]	RecName: Full=E3 ubiquitin-protein ligase COP1 {ECO:0000303|PubMed:1423630}; EC=2.3.2.27 {ECO:0000269|PubMed:14597662}; AltName: Full=Constitutive photomorphogenesis protein 1 {ECO:0000303|PubMed:1423630}; AltName: Full=RING-type E3 ubiquitin transferase COP1 {ECO:0000303|PubMed:1423630};	SubName: Full=Uncharacterized protein {ECO:0000313|EMBL:KNA04927.1};	--	GO:0080008,Cul4-RING E3 ubiquitin ligase complex; GO:0005737,cytoplasm; GO:0016604,nuclear body; GO:0000152,nuclear ubiquitin ligase complex; GO:0005634,nucleus; GO:0042802,identical protein binding; GO:0046872,metal ion binding; GO:0061630,ubiquitin protein ligase activity; GO:0004842,ubiquitin-protein transferase activity; GO:0046283,anthocyanin-containing compound metabolic process; GO:0006281…	WD domain, G-beta repeat
gene-LOC110687421	4.79	3.59	2.99	5.29	7.54	6.08	120	94	78	135	217	150	2.191	1.131	0.000822763	0.00653045	up	NW_018743919.1	3457982	3461187	-	LOC110687421	--	K18045 tyrosine-protein phosphatase SIW14 [EC:3.1.3.48] | (RefSeq) probable tyrosine-protein phosphatase At1g05000 isoform X1 (A)	probable tyrosine-protein phosphatase At1g05000 isoform X1 [Chenopodium quinoa]	RecName: Full=Tyrosine-protein phosphatase DSP1 {ECO:0000305}; EC=3.1.3.48 {ECO:0000255|PROSITE-ProRule:PRU10044, ECO:0000269|PubMed:18433060, ECO:0000269|PubMed:21409566}; AltName: Full=Protein PLANT AND FUNGI ATYPICAL DUAL-SPECIFICITY PHOSPHATASE 1 {ECO:0000303|PubMed:21409566}; Short=AtPFA-DSP1 {ECO:0000303|PubMed:21409566}; AltName: Full=Tyrosine-protein phosphatase At1g05000 {ECO:0000305};	SubName: Full=Uncharacterized protein {ECO:0000313|EMBL:EEE99468.2};	Predicted protein tyrosine phosphatase	GO:0005737,cytoplasm; GO:0016791,phosphatase activity; GO:0004725,protein tyrosine phosphatase activity	Tyrosine phosphatase family
gene-LOC110687452	1.77	0.8	3.66	3.61	10.9	7.52	81	38	174	168	571	338	4.589	2.198	0.000565804	0.00482098	up	NW_018743919.1	3894093	3900653	+	LOC110687452	--	K14445 solute carrier family 13 (sodium-dependent dicarboxylate transporter), member 2/3/5 | (RefSeq) tonoplast dicarboxylate transporter-like (A)	tonoplast dicarboxylate transporter-like [Chenopodium quinoa]	RecName: Full=Tonoplast dicarboxylate transporter; Short=AttDT; AltName: Full=Sodium-dicarboxylate cotransporter-like; Short=AtSDAT; AltName: Full=Vacuolar malate transporter;	SubName: Full=Uncharacterized protein {ECO:0000313|EMBL:KNA24065.1};	Na+/dicarboxylate, Na+/tricarboxylate and phosphate transporters	GO:0016021,integral component of membrane; GO:0005774,vacuolar membrane; GO:0005773,vacuole; GO:0015140,malate transmembrane transporter activity; GO:0015743,malate transport; GO:0051453,regulation of intracellular pH; GO:0006814,sodium ion transport	Sodium:sulfate symporter transmembrane region
gene-LOC110687461	0.3	0.41	0.56	1.11	1.01	0.74	12	17	23	45	46	29	2.91	1.541	0.00108941	0.00814744	up	NW_018743919.1	3967675	3970978	-	LOC110687461	--	K08150 MFS transporter, SP family, solute carrier family 2 (myo-inositol transporter), member 13 | (RefSeq) inositol transporter 4-like (A)	inositol transporter 4-like [Chenopodium quinoa]	RecName: Full=Inositol transporter 4; AltName: Full=Myo-inositol-proton symporter INT4; AltName: Full=Protein INOSITOL TRANSPORTER 4;	SubName: Full=Uncharacterized protein {ECO:0000313|EMBL:KMT04184.1};	Predicted transporter (major facilitator superfamily)	GO:0016021,integral component of membrane; GO:0005886,plasma membrane; GO:0005355,glucose transmembrane transporter activity; GO:0005351,carbohydrate:proton symporter activity; GO:0046323,glucose import; GO:0035428,NA	Sugar (and other) transporter
gene-LOC110687462	0.32	0.23	0.23	0.75	0.72	0.7	12	9	9	29	31	26	3.64	1.864	0.000317958	0.0030383	up	NW_018743919.1	3971020	3974379	-	LOC110687462	--	K08150 MFS transporter, SP family, solute carrier family 2 (myo-inositol transporter), member 13 | (RefSeq) inositol transporter 4-like (A)	inositol transporter 4-like [Chenopodium quinoa]	RecName: Full=Inositol transporter 4; AltName: Full=Myo-inositol-proton symporter INT4; AltName: Full=Protein INOSITOL TRANSPORTER 4;	SubName: Full=Uncharacterized protein {ECO:0000313|EMBL:KMT04184.1};	Predicted transporter (major facilitator superfamily)	GO:0016021,integral component of membrane; GO:0005886,plasma membrane; GO:0005355,glucose transmembrane transporter activity; GO:0005351,carbohydrate:proton symporter activity; GO:0046323,glucose import; GO:0035428,NA	Sugar (and other) transporter
gene-LOC110687467	0.3	0.21	0.19	0.56	0.52	0.51	21	15	14	40	42	35	2.967	1.569	0.000440794	0.00394401	up	NW_018743919.1	4026968	4032570	+	LOC110687467	--	K17964 leucine-rich PPR motif-containing protein, mitochondrial | (RefSeq) hypothetical protein (A)	pentatricopeptide repeat-containing protein At5g64320, mitochondrial-like [Chenopodium quinoa]	RecName: Full=Pentatricopeptide repeat-containing protein At5g64320, mitochondrial; Flags: Precursor;	SubName: Full=Uncharacterized protein {ECO:0000313|EMBL:ONI09762.1};	FOG: PPR repeat	GO:0005739,mitochondrion; GO:0004519,endonuclease activity; GO:0003723,RNA binding; GO:0032543,mitochondrial translation; GO:0009451,RNA modification	PPR repeat family
gene-LOC110687484	0.14	0.15	0.24	0.65	0.32	0.88	6	7	11	29	16	38	4.464	2.158	0.0011382	0.00843363	up	NW_018743919.1	4215964	4221059	+	LOC110687484	--	--	microtubule-associated protein 70-5-like [Chenopodium quinoa]	RecName: Full=Microtubule-associated protein 70-5; Short=AtMAP70-5; AltName: Full=70 kDa microtubule-associated protein 5;	SubName: Full=Uncharacterized protein {ECO:0000313|EMBL:KNA14811.1};	--	GO:0005737,cytoplasm; GO:0005874,microtubule; GO:0008017,microtubule binding; GO:0071555,cell wall organization; GO:0007010,cytoskeleton organization; GO:0009832,plant-type cell wall biogenesis; GO:0010051,xylem and phloem pattern formation	Microtubule-associated protein 70
gene-LOC110687487	8.84	14.89	6.04	31.24	75.03	45.1	284	500	202	1023	2768	1426	6.958	2.799	1.40151e-10	7.7656e-09	up	NW_018743919.1	4263536	4268073	+	LOC110687487	--	K07213 copper chaperone | (RefSeq) copper transport protein ATX1-like (A)	heavy metal-associated isoprenylated plant protein 7-like [Chenopodium quinoa]	RecName: Full=Heavy metal-associated isoprenylated plant protein 7 {ECO:0000303|PubMed:21072340, ECO:0000303|PubMed:23368984}; Short=AtHIP07 {ECO:0000303|PubMed:21072340, ECO:0000303|PubMed:23368984}; AltName: Full=Farnesylated protein 3 {ECO:0000303|PubMed:8837031}; Short=AtFP3 {ECO:0000303|PubMed:8837031}; Flags: Precursor;	SubName: Full=Uncharacterized protein {ECO:0000313|EMBL:KNA08047.1};	Copper chaperone	GO:0005737,cytoplasm; GO:0005886,plasma membrane; GO:0046914,transition metal ion binding; GO:0046916,cellular transition metal ion homeostasis; GO:0030001,metal ion transport	Heavy-metal-associated domain
gene-LOC110687497	0	0	0	0.2	0.23	0.23	0	0	0	7	9	8	55.799	5.802	0.00036873	0.00341017	up	NW_018743919.1	4344300	4346164	+	LOC110687497	--	K13493 cytokinin-N-glucosyltransferase [EC:2.4.1.-] | (RefSeq) UDP-glycosyltransferase 76C2 (A)	UDP-glycosyltransferase 76B1-like [Chenopodium quinoa]	RecName: Full=UDP-glycosyltransferase 76B1 {ECO:0000305}; EC=2.4.1.- {ECO:0000305};	SubName: Full=Uncharacterized protein {ECO:0000313|EMBL:KNA24609.1};	UDP-glucuronosyl and UDP-glucosyl transferase	GO:0043231,intracellular membrane-bounded organelle; GO:0046527,glucosyltransferase activity; GO:0080043,quercetin 3-O-glucosyltransferase activity; GO:0080044,quercetin 7-O-glucosyltransferase activity; GO:0052640,salicylic acid glucosyltransferase (glucoside-forming) activity; GO:0006952,defense response; GO:0010150,leaf senescence; GO:0008152,metabolic process; GO:0002239,response to oomycetes	UDP-glucoronosyl and UDP-glucosyl transferase
gene-LOC110687511	47.05	39.56	47.34	55.42	86.09	98.76	882	775	923	1059	1853	1822	2.364	1.241	0.000140521	0.0015632	up	NW_018743919.1	4756435	4761463	-	LOC110687511	--	--	uncharacterized protein LOC110687511 [Chenopodium quinoa]	--	SubName: Full=Uncharacterized protein {ECO:0000313|EMBL:KNA12102.1};	--	--	Domain of unknown function (DUF3067)
gene-LOC110687517	13.38	9.24	14.72	19.09	47.91	34.06	686	495	785	998	2821	1719	3.575	1.838	1.81048e-05	0.00028542	up	NW_018743919.1	4855507	4859254	+	LOC110687517	--	--	--	--	--	--	--	--
gene-LOC110687518	5.84	3.87	6.18	6.89	22.25	16.94	98	68	108	118	429	280	3.854	1.946	0.000152701	0.00167106	up	NW_018743919.1	4851186	4855525	+	LOC110687518	--	K20471 coatomer subunit delta | (RefSeq) coatomer subunit delta-3-like (A)	uncharacterized protein LOC110687518 isoform X2 [Chenopodium quinoa]	--	SubName: Full=Uncharacterized protein {ECO:0000313|EMBL:KNA06547.1};	--	GO:0030163,protein catabolic process	ATP-dependent Clp protease adaptor protein ClpS
gene-LOC110687597	1.94	1.81	2.04	2.35	10.53	9.57	42	41	46	52	262	204	5.237	2.389	5.36884e-05	0.000710333	up	NW_018743920.1	2383379	2384542	+	LOC110687597	--	K02723 photosystem II PsbY protein | (RefSeq) photosystem II core complex proteins psbY, chloroplastic-like (A)	photosystem II core complex proteins psbY, chloroplastic-like [Chenopodium quinoa]	RecName: Full=Photosystem II core complex proteins psbY, chloroplastic; AltName: Full=L-arginine-metabolizing enzyme; Short=L-AME; Contains: RecName: Full=Photosystem II protein psbY-1, chloroplastic; AltName: Full=psbY-A1; Contains: RecName: Full=Photosystem II protein psbY-2, chloroplastic; AltName: Full=psbY-A2; Flags: Precursor;	SubName: Full=Uncharacterized protein {ECO:0000313|EMBL:KNA05935.1};	--	GO:0009535,chloroplast thylakoid membrane; GO:0016021,integral component of membrane; GO:0009523,photosystem II; GO:0030145,manganese ion binding; GO:0015979,photosynthesis	Photosystem II protein Y (PsbY)
gene-LOC110687641	0.03	0.03	0.03	0.25	0.25	0.22	1	1	1	8	9	7	10.198	3.35	0.00496644	0.0260875	up	NW_018743920.1	8540786	8543222	+	LOC110687641	--	--	--	--	--	--	--	--
gene-LOC110687684	0.72	0.53	0.83	1.53	4.54	1.7	25	19	30	54	180	58	4.946	2.306	8.6785e-05	0.00105276	up	NW_018743920.1	1614681	1616617	+	LOC110687684	--	K07418 cytochrome P450 family 2 subfamily J [EC:1.14.14.1 1.14.14.73 1.14.14.74 1.14.14.75] | (RefSeq) cytochrome P450 71A26-like (A)	cytochrome P450 71A25-like [Chenopodium quinoa]	RecName: Full=Cytochrome P450 71A25; EC=1.14.-.-;	SubName: Full=Uncharacterized protein {ECO:0000313|EMBL:OAY30793.1};	Cytochrome P450 CYP2 subfamily	GO:0005794,Golgi apparatus; GO:0016021,integral component of membrane; GO:0016020,membrane; GO:0020037,heme binding; GO:0005506,iron ion binding; GO:0016709,oxidoreductase activity, acting on paired donors, with incorporation or reduction of molecular oxygen, NAD(P)H as one donor, and incorporation of one atom of oxygen; GO:0044550,secondary metabolite biosynthetic process	Cytochrome P450
gene-LOC110687776	15.59	13.12	17.45	21.59	31.61	42.82	408	359	475	576	950	1103	2.736	1.452	4.89902e-05	0.000658372	up	NW_018743920.1	594288	598503	-	LOC110687776	--	K10949 ER lumen protein retaining receptor | (RefSeq) putative ER lumen protein-retaining receptor C28H8.4 (A)	putative ER lumen protein-retaining receptor C28H8.4 [Chenopodium quinoa]	RecName: Full=ER lumen protein-retaining receptor B;	SubName: Full=Uncharacterized protein {ECO:0000313|EMBL:KNA20699.1};	ER lumen protein retaining receptor	GO:0005789,endoplasmic reticulum membrane; GO:0005794,Golgi apparatus; GO:0000139,Golgi membrane; GO:0016021,integral component of membrane; GO:0046923,ER retention sequence binding; GO:0010204,defense response signaling pathway, resistance gene-independent; GO:0006621,protein retention in ER lumen; GO:0015031,protein transport; GO:0016192,vesicle-mediated transport	ER lumen protein retaining receptor
gene-LOC110687779	2.01	2.19	5.22	37.95	30.08	44.29	50	57	135	962	859	1084	15.205	3.926	7.51826e-20	1.77046e-17	up	NW_018743920.1	600461	604600	-	LOC110687779	--	K10949 ER lumen protein retaining receptor | (RefSeq) putative ER lumen protein-retaining receptor C28H8.4 (A)	putative ER lumen protein-retaining receptor C28H8.4 [Chenopodium quinoa]	RecName: Full=ER lumen protein-retaining receptor B;	SubName: Full=Uncharacterized protein {ECO:0000313|EMBL:KMS97095.1};	ER lumen protein retaining receptor	GO:0005789,endoplasmic reticulum membrane; GO:0005794,Golgi apparatus; GO:0000139,Golgi membrane; GO:0016021,integral component of membrane; GO:0046923,ER retention sequence binding; GO:0010204,defense response signaling pathway, resistance gene-independent; GO:0006621,protein retention in ER lumen; GO:0015031,protein transport; GO:0016192,vesicle-mediated transport	ER lumen protein retaining receptor
gene-LOC110687784	0.08	0	0.08	1.05	0.78	0.66	3	0	3	38	32	23	19.207	4.264	2.88117e-07	7.9123e-06	up	NW_018743920.1	699954	702622	-	LOC110687784	--	--	uncharacterized protein LOC110687784 [Chenopodium quinoa]	--	SubName: Full=Uncharacterized protein {ECO:0000313|EMBL:KMS99394.1};	--	--	Plant mobile domain
gene-LOC110687785	4.1	4.39	2.04	28.74	31.52	29.14	133	149	69	951	1175	931	11.248	3.492	1.1898e-31	1.01885e-28	up	NW_018743920.1	703582	705329	-	LOC110687785	--	K22794 flavonol-3-O-glucoside/galactoside glucosyltransferase [EC:2.4.1.239 2.4.1.-] | (RefSeq) anthocyanidin 3-O-glucoside 2''-O-glucosyltransferase-like (A)	LOW QUALITY PROTEIN: anthocyanidin 3-O-glucosyltransferase-like [Chenopodium quinoa]	RecName: Full=Anthocyanidin 3-O-glucosyltransferase; EC=2.4.1.115; AltName: Full=Anthocyanin rhamnosyl transferase; AltName: Full=Flavonol 3-O-glucosyltransferase; AltName: Full=UDP-glucose flavonoid 3-O-glucosyltransferase;	SubName: Full=Uncharacterized protein {ECO:0000313|EMBL:KMS97086.1};	UDP-glucuronosyl and UDP-glucosyl transferase	GO:0047213,anthocyanidin 3-O-glucosyltransferase activity; GO:0009718,anthocyanin-containing compound biosynthetic process	UDP-glucoronosyl and UDP-glucosyl transferase
gene-LOC110687787	9.1	7.84	8.14	13.81	14.23	16.88	201	181	187	311	361	367	2.338	1.225	6.15153e-07	1.52385e-05	up	NW_018743920.1	717067	722695	+	LOC110687787	--	K15161 cyclin-C | (RefSeq) cyclin-C1-1-like isoform X1 (A)	cyclin-C1-1-like isoform X1 [Chenopodium quinoa]	RecName: Full=Cyclin-C1-1; Short=CycC1;1;	SubName: Full=Uncharacterized protein {ECO:0000313|EMBL:KNA20709.1};	CDK8 kinase-activating protein cyclin C	GO:0000307,cyclin-dependent protein kinase holoenzyme complex; GO:0016592,mediator complex; GO:0005634,nucleus; GO:0016538,cyclin-dependent protein serine/threonine kinase regulator activity; GO:0007049,cell cycle; GO:0051301,cell division; GO:0045737,positive regulation of cyclin-dependent protein serine/threonine kinase activity; GO:1901409,positive regulation of phosphorylation of RNA polymera…	Cyclin, N-terminal domain
gene-LOC110687797	17.55	16.24	21.36	28.68	36.17	44.06	488	472	618	813	1155	1206	2.584	1.37	5.15774e-06	9.7557e-05	up	NW_018743920.1	808836	812556	-	LOC110687797	--	K09060 plant G-box-binding factor | (RefSeq) bZIP transcription factor 16-like (A)	UV-B-induced protein At3g17800, chloroplastic-like [Chenopodium quinoa]	RecName: Full=UV-B-induced protein At3g17800, chloroplastic {ECO:0000305}; Flags: Precursor;	SubName: Full=Uncharacterized protein {ECO:0000313|EMBL:KMT05560.1};	--	GO:0009507,chloroplast; GO:0010193,response to ozone; GO:0010224,response to UV-B; GO:0009611,response to wounding	Protein of unknown function (DUF760)
gene-LOC110687806	4.11	2.43	9.82	29.21	104.92	158.59	76	47	189	551	2229	2888	23.455	4.552	2.80469e-11	1.77904e-09	up	NW_018743920.1	907553	908650	-	LOC110687806	--	--	jasmonate-induced protein homolog [Chenopodium quinoa]	RecName: Full=Jasmonate-induced protein homolog;	SubName: Full=Uncharacterized protein {ECO:0000313|EMBL:KNA11535.1};	--	--	--
gene-LOC110687811	0.11	0.23	0.19	0.67	0.92	0.22	5	11	9	31	48	10	4.48	2.164	0.00286625	0.0171727	up	NW_018743920.1	988126	990576	+	LOC110687811	--	--	uncharacterized protein LOC110687811 [Chenopodium quinoa]	--	SubName: Full=Uncharacterized protein {ECO:0000313|EMBL:KNA19229.1};	--	--	PDDEXK-like family of unknown function
gene-LOC110687817	2.91	3.89	3.39	6.03	11.5	11.84	165	231	200	349	750	662	3.862	1.949	7.23453e-08	2.29061e-06	up	NW_018743920.1	1079913	1083173	+	LOC110687817	--	K20714 serine/threonine-protein kinase OXI1 [EC:2.7.11.1] | (RefSeq) serine/threonine-protein kinase OXI1-like (A)	serine/threonine-protein kinase OXI1-like [Chenopodium quinoa]	RecName: Full=Serine/threonine-protein kinase OXI1; EC=2.7.11.1; AltName: Full=AGC serine/threonine-protein kinase subfamily 2 member 1 {ECO:0000303|PubMed:13678909}; AltName: Full=Protein OXIDATIVE SIGNAL-INDUCIBLE 1 {ECO:0000303|PubMed:14985766};	SubName: Full=Uncharacterized protein {ECO:0000313|EMBL:KMS95713.1};	Putative serine/threonine protein kinase	GO:0005737,cytoplasm; GO:0005634,nucleus; GO:0005886,plasma membrane; GO:0005524,ATP binding; GO:0016301,kinase activity; GO:0004672,protein kinase activity; GO:0019901,protein kinase binding; GO:0004674,protein serine/threonine kinase activity; GO:0006952,defense response; GO:0035556,intracellular signal transduction; GO:0006468,protein phosphorylation; GO:0006979,response to oxidative stress; G…	Protein kinase domain
gene-LOC110687821	4.56	4.33	4.24	7.95	9.4	9.05	152	151	147	270	360	297	2.635	1.398	7.68209e-09	2.99014e-07	up	NW_018743920.1	1418808	1421670	-	LOC110687821	--	--	cytochrome b561 and DOMON domain-containing protein At4g12980-like [Chenopodium quinoa]	RecName: Full=Cytochrome b561 and DOMON domain-containing protein At4g12980; AltName: Full=Protein b561A.tha15; Flags: Precursor;	SubName: Full=Uncharacterized protein {ECO:0000313|EMBL:KMS95719.1};	Predicted membrane protein, contains DoH and Cytochrome b-561/ferric reductase transmembrane domains	GO:0016021,integral component of membrane; GO:0046872,metal ion binding; GO:0055114,oxidation-reduction process	Protein of unknown function (DUF568)
gene-LOC110687833	0.24	0.07	0.35	11.15	9.13	8.87	14	4	21	656	605	504	56.131	5.811	1.70606e-38	2.00878e-35	up	NW_018743920.1	1545967	1550175	+	LOC110687833	--	--	--	--	--	--	--	--
gene-LOC110687834	5.62	4.59	5.19	19.53	34.99	38	205	175	197	726	1465	1364	7.953	2.992	7.38682e-17	1.136e-14	up	NW_018743920.1	1551695	1553765	+	LOC110687834	--	K07418 cytochrome P450 family 2 subfamily J [EC:1.14.14.1 1.14.14.73 1.14.14.74 1.14.14.75] | (RefSeq) cytochrome P450 71A26-like (A)	cytochrome P450 71A3-like [Chenopodium quinoa]	RecName: Full=Cytochrome P450 71A4; EC=1.14.-.-; AltName: Full=CYPLXXIA4; AltName: Full=Cytochrome P-450EG2;	SubName: Full=Uncharacterized protein {ECO:0000313|EMBL:CAN67678.1};	Cytochrome P450 CYP2 subfamily	GO:0016021,integral component of membrane; GO:0020037,heme binding; GO:0005506,iron ion binding; GO:0004497,monooxygenase activity; GO:0016705,oxidoreductase activity, acting on paired donors, with incorporation or reduction of molecular oxygen	Cytochrome P450
gene-LOC110687835	0.02	0	0.04	0.54	0.38	0.47	1	0	2	30	24	25	33.251	5.055	6.36221e-07	1.57087e-05	up	NW_018743920.1	1555361	1558492	+	LOC110687835	--	K07418 cytochrome P450 family 2 subfamily J [EC:1.14.14.1] | (RefSeq) cytochrome P450 71A8-like (A)	cytochrome P450 71A21-like [Chenopodium quinoa]	RecName: Full=Cytochrome P450 71A21; EC=1.14.-.-;	SubName: Full=Uncharacterized protein {ECO:0000313|EMBL:OAY30793.1};	Cytochrome P450 CYP2 subfamily	GO:0016021,integral component of membrane; GO:0016020,membrane; GO:0020037,heme binding; GO:0005506,iron ion binding; GO:0016709,oxidoreductase activity, acting on paired donors, with incorporation or reduction of molecular oxygen, NAD(P)H as one donor, and incorporation of one atom of oxygen; GO:0044550,secondary metabolite biosynthetic process	Cytochrome P450
gene-LOC110687837	0.49	0.18	0.84	0.54	3.9	5.47	18	7	32	20	163	196	8.594	3.103	0.000290347	0.00283231	up	NW_018743920.1	1581528	1585246	-	LOC110687837	--	K14638 solute carrier family 15 (peptide/histidine transporter), member 3/4 | (RefSeq) protein NRT1/ PTR FAMILY 5.9-like (A)	protein NRT1/ PTR FAMILY 5.9-like [Chenopodium quinoa]	RecName: Full=Protein NRT1/ PTR FAMILY 5.8; Short=AtNPF5.8;	SubName: Full=Uncharacterized protein {ECO:0000313|EMBL:KNA16965.1};	H+/oligopeptide symporter	GO:0016021,integral component of membrane; GO:0022857,transmembrane transporter activity; GO:0009624,response to nematode	POT family
gene-LOC110687838	79.42	68.94	82.42	99.63	121.93	135.27	1295	1175	1398	1656	2283	2171	2.022	1.016	9.34861e-05	0.0011175	up	NW_018743920.1	1602160	1606816	+	LOC110687838	--	K17892 ferredoxin-thioredoxin reductase catalytic chain [EC:1.8.7.2] | (RefSeq) ferredoxin-thioredoxin reductase catalytic chain, chloroplastic (A)	ferredoxin-thioredoxin reductase catalytic chain, chloroplastic [Chenopodium quinoa]	RecName: Full=Ferredoxin-thioredoxin reductase catalytic chain, chloroplastic; Short=FTR-C; EC=1.8.7.2; AltName: Full=B2; AltName: Full=Ferredoxin-thioredoxin reductase subunit B; Short=FTR-B; Flags: Precursor;	RecName: Full=Ferredoxin-thioredoxin reductase, catalytic chain {ECO:0000256|PIRNR:PIRNR000260}; Short=FTR-C {ECO:0000256|PIRNR:PIRNR000260}; EC=1.8.7.2 {ECO:0000256|PIRNR:PIRNR000260}; AltName: Full=Ferredoxin-thioredoxin reductase subunit B {ECO:0000256|PIRNR:PIRNR000260};	--	GO:0009507,chloroplast; GO:0051539,4 iron, 4 sulfur cluster binding; GO:0009055,electron transfer activity; GO:0103012,ferredoxin-thioredoxin reductase activity; GO:0030385,ferredoxin:thioredoxin reductase activity; GO:0046872,metal ion binding; GO:0055114,oxidation-reduction process	Ferredoxin thioredoxin reductase catalytic beta chain
gene-LOC110687839	0.59	0.15	0.35	0.78	2.42	1.04	26	7	16	35	122	45	5.105	2.352	0.000871937	0.00684007	up	NW_018743920.1	1607484	1615032	+	LOC110687839	--	--	uncharacterized protein LOC110687839 isoform X1 [Chenopodium quinoa]	--	SubName: Full=uncharacterized protein LOC104595867 isoform X1 {ECO:0000313|RefSeq:XP_010255111.1};	--	--	SAM domain (Sterile alpha motif)
gene-LOC110687841	0.13	0.03	0.06	3.16	13.03	22.87	4	1	2	103	478	719	245.538	7.94	1.44338e-19	3.29598e-17	up	NW_018743920.1	1681755	1683895	+	LOC110687841	--	K07418 cytochrome P450 family 2 subfamily J [EC:1.14.14.1 1.14.14.73 1.14.14.74 1.14.14.75] | (RefSeq) cytochrome P450 71A26-like (A)	cytochrome P450 71A26-like [Chenopodium quinoa]	RecName: Full=Cytochrome P450 71A6; EC=1.14.-.-; Flags: Fragment;	SubName: Full=Uncharacterized protein {ECO:0000313|EMBL:OAY30793.1};	Cytochrome P450 CYP2 subfamily	GO:0016021,integral component of membrane; GO:0020037,heme binding; GO:0005506,iron ion binding; GO:0004497,monooxygenase activity; GO:0016705,oxidoreductase activity, acting on paired donors, with incorporation or reduction of molecular oxygen	Cytochrome P450
gene-LOC110687843	1.15	0.33	1.03	0.96	3.56	7.91	40	12	37	34	142	270	6.546	2.711	0.000552174	0.0047155	up	NW_018743920.1	1713826	1716512	+	LOC110687843	--	K07418 cytochrome P450 family 2 subfamily J [EC:1.14.14.1 1.14.14.73 1.14.14.74 1.14.14.75] | (RefSeq) cytochrome P450 71A26-like (A)	cytochrome P450 71A25-like [Chenopodium quinoa]	RecName: Full=Cytochrome P450 71A25; EC=1.14.-.-;	SubName: Full=Uncharacterized protein {ECO:0000313|EMBL:CAN67678.1};	Cytochrome P450 CYP2 subfamily	GO:0005794,Golgi apparatus; GO:0016021,integral component of membrane; GO:0016020,membrane; GO:0020037,heme binding; GO:0005506,iron ion binding; GO:0016709,oxidoreductase activity, acting on paired donors, with incorporation or reduction of molecular oxygen, NAD(P)H as one donor, and incorporation of one atom of oxygen; GO:0044550,secondary metabolite biosynthetic process	Cytochrome P450
gene-LOC110687844	1.13	0.77	1.08	1.81	1.96	1.92	63	45	63	103	126	106	2.478	1.309	8.87786e-05	0.00107006	up	NW_018743920.1	1719943	1723634	+	LOC110687844	--	--	--	--	--	--	--	--
gene-LOC110687845	1.84	1.55	1.2	3.03	3.33	3.14	25	22	17	42	52	42	2.715	1.441	0.000479335	0.00421086	up	NW_018743920.1	1719522	1721700	-	LOC110687845	--	--	--	--	--	--	--	--
gene-LOC110687864	10.74	8.55	10.83	15.96	18.29	16.53	410	341	430	621	802	621	2.19	1.131	6.11421e-06	0.000113182	up	NW_018743920.1	2169096	2173649	+	LOC110687864	--	K01076 abhydrolase domain-containing protein 17 [EC:3.1.2.22] | (RefSeq) protein ABHD17C-like (A)	protein ABHD17C-like [Chenopodium quinoa]	--	SubName: Full=Uncharacterized protein {ECO:0000313|EMBL:KNA07800.1};	Predicted alpha/beta hydrolase	--	Serine aminopeptidase, S33
gene-LOC110687869	36.61	27.74	33.61	48.28	38.46	75.07	601	476	574	808	725	1213	2.145	1.101	0.000924627	0.00715803	up	NW_018743920.1	2204078	2206988	-	LOC110687869	--	K07304 peptide-methionine (S)-S-oxide reductase [EC:1.8.4.11] | (RefSeq) peptide methionine sulfoxide reductase-like (A)	peptide methionine sulfoxide reductase-like [Chenopodium quinoa]	RecName: Full=Peptide methionine sulfoxide reductase; EC=1.8.4.11; AltName: Full=Fruit-ripening protein E4; AltName: Full=Peptide-methionine (S)-S-oxide reductase; Short=Peptide Met(O) reductase; AltName: Full=Protein-methionine-S-oxide reductase;	SubName: Full=Uncharacterized protein {ECO:0000313|EMBL:KNA07794.1};	Peptide methionine sulfoxide reductase	GO:0008113,peptide-methionine (S)-S-oxide reductase activity	Peptide methionine sulfoxide reductase
gene-LOC110687880	123.31	79.59	115.1	154.76	173.29	166.72	2821	1903	2739	3609	4552	3754	2.012	1.008	0.000306252	0.00295492	up	NW_018743920.1	2391489	2395139	-	LOC110687880	--	K20884 riboflavin kinase / FMN hydrolase [EC:2.7.1.26 3.1.3.102] | (RefSeq) bifunctional riboflavin kinase/FMN phosphatase isoform X2 (A)	CBBY-like protein [Chenopodium quinoa]	RecName: Full=CBBY-like protein {ECO:0000303|PubMed:27246049}; Short=AtCbby {ECO:0000303|PubMed:27246049}; EC=3.1.3.- {ECO:0000269|PubMed:27246049}; Flags: Precursor;	SubName: Full=Uncharacterized protein {ECO:0000313|EMBL:KNA05931.1};	Predicted haloacid-halidohydrolase and related hydrolases	GO:0009507,chloroplast; GO:0009941,chloroplast envelope; GO:0009570,chloroplast stroma; GO:0016787,hydrolase activity; GO:0046872,metal ion binding; GO:0008152,metabolic process	Haloacid dehalogenase-like hydrolase
gene-LOC110687889	0	0	0	0.29	0.09	0.08	0	0	0	14	5	4	51.419	5.684	0.00121392	0.008876	up	NW_018743920.1	2545051	2549657	+	LOC110687889	--	--	putative B3 domain-containing protein Os03g0621600 [Chenopodium quinoa]	RecName: Full=B3 domain-containing protein Os01g0905400;	SubName: Full=Uncharacterized protein {ECO:0000313|EMBL:KNA11404.1};	--	GO:0005634,nucleus; GO:0003677,DNA binding; GO:0006355,regulation of transcription, DNA-templated; GO:0006351,transcription, DNA-templated	B3 DNA binding domain
gene-LOC110687924	8.79	7.64	10.69	18.95	19.7	16.09	384	349	486	844	988	692	2.604	1.381	5.3512e-08	1.75629e-06	up	NW_018743920.1	2978923	2984865	-	LOC110687924	--	--	uncharacterized protein LOC110687924 isoform X1 [Chenopodium quinoa]	--	SubName: Full=Uncharacterized protein {ECO:0000313|EMBL:KNA10678.1};	--	--	Protein of unknown function, DUF547
gene-LOC110687926	7.43	6.59	12.68	26.51	25.55	22.53	138	128	245	502	545	412	3.574	1.838	6.85363e-08	2.1884e-06	up	NW_018743920.1	2977714	2978945	+	LOC110687926	--	--	uncharacterized protein LOC110687926 [Chenopodium quinoa]	--	SubName: Full=Uncharacterized protein {ECO:0000313|EMBL:KNA10679.1};	--	--	--
gene-LOC110687931	11.58	9.37	15.85	17.29	47.05	44.17	458	387	652	697	2136	1719	3.906	1.966	2.3982e-05	0.000362737	up	NW_018743920.1	3004845	3012038	+	LOC110687931	--	K01056 peptidyl-tRNA hydrolase, PTH1 family [EC:3.1.1.29] | (RefSeq) chloroplastic group IIB intron splicing facilitator CRS2, chloroplastic-like (A)	uncharacterized protein LOC110687931 [Chenopodium quinoa]	--	SubName: Full=Uncharacterized protein {ECO:0000313|EMBL:KNA14398.1};	START domain-containing proteins involved in steroidogenesis/phosphatidylcholine transfer	GO:0016021,integral component of membrane; GO:0008289,lipid binding	START domain
gene-LOC110687932	6.7	3.51	2.76	18.81	26.91	26.65	350	192	150	1002	1615	1371	7.341	2.876	5.88232e-13	4.86039e-11	up	NW_018743920.1	3022872	3033092	+	LOC110687932	--	K15813 beta-amyrin synthase [EC:5.4.99.39] | (RefSeq) beta-amyrin synthase-like (A)	beta-amyrin synthase-like [Chenopodium quinoa]	RecName: Full=Beta-amyrin synthase; EC=5.4.99.39;	RecName: Full=Terpene cyclase/mutase family member {ECO:0000256|RuleBase:RU362003}; EC=5.4.99.- {ECO:0000256|RuleBase:RU362003};	Oxidosqualene-lanosterol cyclase and related proteins	GO:0042300,beta-amyrin synthase activity; GO:0019745,pentacyclic triterpenoid biosynthetic process	Squalene-hopene cyclase C-terminal domain
gene-LOC110688006	1.7	2.89	2	3.27	3.95	3.26	27	48	33	53	72	51	2.104	1.073	0.00407772	0.0224161	up	NW_018743920.1	3886593	3887445	-	LOC110688006	--	K20359 PRA1 family protein 1 | (RefSeq) PRA1 family protein D-like (A)	PRA1 family protein D-like [Chenopodium quinoa]	RecName: Full=PRA1 family protein D; Short=AtPRA1.D; AltName: Full=CAMV MOVEMENT PROTEIN-INTERACTING PROTEIN 7; AltName: Full=Prenylated Rab acceptor 5;	RecName: Full=PRA1 family protein {ECO:0000256|RuleBase:RU363107};	Prenylated rab acceptor 1	GO:0005737,cytoplasm; GO:0005783,endoplasmic reticulum; GO:0010008,endosome membrane; GO:0016021,integral component of membrane; GO:0046739,transport of virus in multicellular host; GO:0016192,vesicle-mediated transport	PRA1 family protein
gene-LOC110688015	0.12	0.12	0.38	0.3	0.66	3.2	4	4	13	10	25	104	8.906	3.155	0.00156183	0.0108393	up	NW_018743920.1	3997145	3998918	+	LOC110688015	--	K19038 E3 ubiquitin-protein ligase ATL41 [EC:2.3.2.27] | (RefSeq) E3 ubiquitin-protein ligase ATL41-like (A)	RING-H2 finger protein ATL60-like [Chenopodium quinoa]	RecName: Full=RING-H2 finger protein ATL3; EC=2.3.2.27 {ECO:0000305}; AltName: Full=RING-type E3 ubiquitin transferase ATL3 {ECO:0000305};	SubName: Full=Uncharacterized protein {ECO:0000313|EMBL:OAY36315.1};	FOG: Predicted E3 ubiquitin ligase	GO:0016021,integral component of membrane; GO:0046872,metal ion binding; GO:0061630,ubiquitin protein ligase activity; GO:0043161,proteasome-mediated ubiquitin-dependent protein catabolic process	Ring finger domain
gene-LOC110688021	1.98	0.14	2.05	2.75	13.43	16.07	79	6	85	112	615	631	10.067	3.332	0.00500181	0.0262148	up	NW_018743920.1	4065735	4069548	+	LOC110688021	--	K01051 pectinesterase [EC:3.1.1.11] | (RefSeq) pectinesterase-like (A)	pectinesterase-like [Chenopodium quinoa]	RecName: Full=Pectinesterase 3; Short=PE 3; EC=3.1.1.11; AltName: Full=Pectin methylesterase 3; Flags: Precursor;	SubName: Full=pectinesterase-like {ECO:0000313|RefSeq:XP_018850544.1};	--	GO:0005618,cell wall; GO:0005576,extracellular region; GO:0045330,aspartyl esterase activity; GO:0004857,enzyme inhibitor activity; GO:0030599,pectinesterase activity; GO:0042545,cell wall modification; GO:0045490,pectin catabolic process	Pectinesterase
gene-LOC110688071	0.02	0.04	0.43	1.03	2.13	8.47	1	2	22	52	121	413	30.81	4.945	0.000633203	0.00529351	up	NW_018743920.1	4802875	4808051	-	LOC110688071	--	K15333 tRNA guanosine-2'-O-methyltransferase [EC:2.1.1.34] | (RefSeq) uncharacterized protein LOC104224633 (A)	subtilisin-like protease SBT1.4 [Chenopodium quinoa]	RecName: Full=Subtilisin-like protease SBT1.4 {ECO:0000303|PubMed:16193095}; EC=3.4.21.- {ECO:0000255|PROSITE-ProRule:PRU10082}; AltName: Full=Subtilase subfamily 1 member 4 {ECO:0000303|PubMed:16193095}; Short=AtSBT1.4 {ECO:0000303|PubMed:16193095}; Flags: Precursor;	SubName: Full=Uncharacterized protein {ECO:0000313|EMBL:KNA20367.1};	--	GO:0048046,apoplast; GO:0009505,plant-type cell wall; GO:0005774,vacuolar membrane; GO:0005773,vacuole; GO:0004252,serine-type endopeptidase activity; GO:0010150,leaf senescence; GO:0010223,secondary shoot formation	Subtilase family
gene-LOC110688074	0.11	0.38	0.34	3.1	3.13	4.47	6	21	19	168	191	234	16.909	4.08	2.05424e-19	4.60713e-17	up	NW_018743920.1	4843327	4846183	-	LOC110688074	--	K13754 solute carrier family 24 (sodium/potassium/calcium exchanger), member 6 | (RefSeq) cation/calcium exchanger 4-like (A)	cation/calcium exchanger 4-like [Chenopodium quinoa]	RecName: Full=Cation/calcium exchanger 4; Short=AtCCX4; AltName: Full=Protein CATION CALCIUM EXCHANGER 4; AltName: Full=Protein CATION EXCHANGER 10;	SubName: Full=Uncharacterized protein {ECO:0000313|EMBL:KNA20363.1};	K+-dependent Na+:Ca2+ antiporter	GO:0016021,integral component of membrane; GO:0015297,antiporter activity; GO:0006812,cation transport; GO:0006813,potassium ion transport; GO:0006814,sodium ion transport	Sodium/calcium exchanger protein
gene-LOC110688142	311.87	287.71	496.33	578.11	857.9	879.83	4917	4741	8140	9291	15531	13653	2.756	1.463	3.78778e-05	0.000531457	up	NW_018743920.1	5801780	5804060	+	LOC110688142	--	K14332 photosystem I subunit PsaO | (RefSeq) photosystem I subunit O-like (A)	photosystem I subunit O-like [Chenopodium quinoa]	RecName: Full=Photosystem I subunit O; Short=PSI-O; Flags: Precursor;	SubName: Full=Uncharacterized protein {ECO:0000313|EMBL:KNA13155.1};	--	GO:0009507,chloroplast; GO:0009535,chloroplast thylakoid membrane; GO:0016021,integral component of membrane; GO:0009522,photosystem I; GO:0009579,thylakoid; GO:0009768,photosynthesis, light harvesting in photosystem I; GO:0009767,photosynthetic electron transport chain	--
gene-LOC110688164	20.69	22.87	20.44	56.77	37.55	41.44	979	1131	1006	2738	2040	1930	2.732	1.45	9.45993e-20	2.20019e-17	up	NW_018743920.1	6060490	6070054	+	LOC110688164	--	--	BEL1-like homeodomain protein 1 [Chenopodium quinoa]	RecName: Full=BEL1-like homeodomain protein 1; Short=BEL1-like protein 1; AltName: Full=Protein EMBRYO SAC DEVELOPMENT ARREST 29;	SubName: Full=Uncharacterized protein {ECO:0000313|EMBL:KNA25228.1};	Transcription factor MEIS1 and related HOX domain proteins	GO:0005737,cytoplasm; GO:0005634,nucleus; GO:0003677,DNA binding; GO:0003700,DNA-binding transcription factor activity; GO:0046982,protein heterodimerization activity; GO:0042803,protein homodimerization activity; GO:0010197,polar nucleus fusion; GO:0009737,response to abscisic acid; GO:0010201,response to continuous far red light stimulus by the high-irradiance response system; GO:0009610,respon…	Associated with HOX
gene-LOC110688168	3.36	2.08	3.67	3.27	4.81	6.53	167	108	190	166	275	320	2.097	1.068	0.0114474	0.0491977	up	NW_018743920.1	6133949	6136849	+	LOC110688168	--	K09528 DnaJ homolog subfamily C member 8 | (RefSeq) AT-rich interactive domain-containing protein 4B-like (A)	protein FAF-like, chloroplastic [Chenopodium quinoa]	RecName: Full=Protein FAF-like, chloroplastic; Flags: Precursor;	SubName: Full=Uncharacterized protein {ECO:0000313|EMBL:KNA23389.1};	--	GO:0009507,chloroplast	Fantastic Four meristem regulator
gene-LOC110688202	12.53	7.88	17.39	25.04	36.46	52.47	187	123	270	381	625	771	3.922	1.972	1.0588e-05	0.000179944	up	NW_018743920.1	6499216	6501318	+	LOC110688202	--	K08864 tousled-like kinase [EC:2.7.11.1] | (RefSeq) serine/threonine-protein kinase TOUSLED-like isoform X1 (A)	uncharacterized protein LOC110688202 [Chenopodium quinoa]	--	SubName: Full=Uncharacterized protein {ECO:0000313|EMBL:KNA06460.1};	Tousled-like protein kinase	--	Protein of unknown function (DUF3148)
gene-LOC110688217	22.1	11.85	32.25	54.45	105.87	94.16	446	250	677	1120	2453	1870	4.99	2.319	7.93438e-07	1.90173e-05	up	NW_018743920.1	6620317	6622659	+	LOC110688217	--	K09838 zeaxanthin epoxidase [EC:1.14.15.21] | (RefSeq) zeaxanthin epoxidase, chloroplastic-like (A)	uncharacterized protein LOC110688217 [Chenopodium quinoa]	RecName: Full=Zeaxanthin epoxidase, chloroplastic; Short=AtZEP; EC=1.14.15.21; AltName: Full=Protein ABA DEFICIENT 1; Short=AtABA1; AltName: Full=Protein IMPAIRED IN BABA-INDUCED STERILITY 3; AltName: Full=Protein LOW EXPRESSION OF OSMOTIC STRESS-RESPONSIVE GENES 6; AltName: Full=Protein NON-PHOTOCHEMICAL QUENCHING 2; Flags: Precursor;	SubName: Full=Uncharacterized protein {ECO:0000313|EMBL:KNA14267.1};	--	GO:0009507,chloroplast; GO:0009941,chloroplast envelope; GO:0016020,membrane; GO:0071949,FAD binding; GO:0009540,zeaxanthin epoxidase [overall] activity; GO:0009688,abscisic acid biosynthetic process; GO:0009408,response to heat; GO:0010114,response to red light; GO:0009414,response to water deprivation; GO:0044550,secondary metabolite biosynthetic process; GO:0010182,sugar mediated signaling pat…	FHA domain
gene-LOC110688235	11.04	5.95	12.69	46.45	71.27	55.78	348	196	416	1492	2579	1730	7.562	2.919	8.30949e-14	8.0692e-12	up	NW_018743920.1	6769681	6771373	-	LOC110688235	--	K20716 mitogen-activated protein kinase kinase kinase 17/18 | (RefSeq) mitogen-activated protein kinase kinase kinase NPK1-like (A)	mitogen-activated protein kinase kinase kinase 18-like [Chenopodium quinoa]	RecName: Full=Mitogen-activated protein kinase kinase kinase 17 {ECO:0000303|PubMed:25720833}; EC=2.7.11.25 {ECO:0000250|UniProtKB:Q9ZVP5, ECO:0000255|PROSITE-ProRule:PRU00159};	SubName: Full=Uncharacterized protein {ECO:0000313|EMBL:KNA23213.1};	MEKK and related serine/threonine protein kinases	GO:0005737,cytoplasm; GO:0005634,nucleus; GO:0005524,ATP binding; GO:0004709,MAP kinase kinase kinase activity; GO:0004674,protein serine/threonine kinase activity; GO:0004702,NA; GO:0009738,abscisic acid-activated signaling pathway; GO:0032147,activation of protein kinase activity; GO:0007346,regulation of mitotic cell cycle; GO:0009737,response to abscisic acid; GO:0006970,response to osmotic s…	Protein kinase domain
gene-LOC110688244	2.43	3.4	1.87	3.31	12.04	11.21	106	155	85	147	603	481	4.729	2.242	1.82063e-05	0.00028678	up	NW_018743920.1	6889389	6897553	+	LOC110688244	--	K17871 NADH:ubiquinone reductase (non-electrogenic) [EC:1.6.5.9] | (RefSeq) internal alternative NAD(P)H-ubiquinone oxidoreductase A1, mitochondrial-like (A)	internal alternative NAD(P)H-ubiquinone oxidoreductase A1, mitochondrial-like [Chenopodium quinoa]	RecName: Full=Internal alternative NAD(P)H-ubiquinone oxidoreductase A1, mitochondrial; EC=1.6.5.9; AltName: Full=Internal alternative NADH dehydrogenase NDA1; AltName: Full=Internal non-phosphorylating NAD(P)H dehydrogenase 1; Short=StNDI1; AltName: Full=NADH:ubiquinone reductase (non-electrogenic) NDA1; Flags: Precursor;	SubName: Full=Uncharacterized protein {ECO:0000313|EMBL:KNA22463.1};	NADH-dehydrogenase (ubiquinone)	GO:0005743,mitochondrial inner membrane; GO:0005759,mitochondrial matrix; GO:0005777,peroxisome; GO:0003959,NADPH dehydrogenase activity; GO:0055114,oxidation-reduction process	Pyridine nucleotide-disulphide oxidoreductase
gene-LOC110688258	179.33	106.65	129.38	137.42	266.84	386.17	4770	2965	3580	3726	8150	10110	2.522	1.334	0.00255726	0.0157911	up	NW_018743920.1	6998935	7000363	-	LOC110688258	--	K06215 pyridoxal 5'-phosphate synthase pdxS subunit [EC:4.3.3.6] | (RefSeq) probable pyridoxal 5'-phosphate synthase subunit PDX1 (A)	probable pyridoxal 5'-phosphate synthase subunit PDX1 [Chenopodium quinoa]	RecName: Full=Probable pyridoxal 5'-phosphate synthase subunit PDX1; Short=PLP synthase subunit PDX1; EC=4.3.3.6; AltName: Full=Ethylene-inducible protein HEVER;	SubName: Full=Uncharacterized protein {ECO:0000313|EMBL:KNA16621.1};	Stationary phase-induced protein, SOR/SNZ family	GO:0036381,pyridoxal 5'-phosphate synthase (glutamine hydrolysing) activity; GO:0042823,pyridoxal phosphate biosynthetic process	SOR/SNZ family
gene-LOC110688270	2.2	2.56	0.94	2.64	3.46	3.13	108	131	48	132	195	151	2.17	1.118	0.00555314	0.0284127	up	NW_018743920.1	7085449	7090425	-	LOC110688270	--	K10140 DNA damage-binding protein 2 | (RefSeq) protein DAMAGED DNA-BINDING 2-like (A)	protein DAMAGED DNA-BINDING 2-like [Chenopodium quinoa]	RecName: Full=Protein DAMAGED DNA-BINDING 2; AltName: Full=UV-damaged DNA-binding protein 2;	SubName: Full=Uncharacterized protein {ECO:0000313|EMBL:KNA25911.1};	WD40 protein	GO:0080008,Cul4-RING E3 ubiquitin ligase complex; GO:0005634,nucleus; GO:0003684,damaged DNA binding; GO:0008270,zinc ion binding; GO:0006281,DNA repair; GO:0016567,protein ubiquitination; GO:0010224,response to UV-B	WD domain, G-beta repeat
gene-LOC110688271	5.59	4.67	9.13	14.77	32.17	57.28	223	195	379	601	1474	2250	7.099	2.828	1.26227e-07	3.75967e-06	up	NW_018743920.1	7095407	7098515	+	LOC110688271	--	K11778 ditrans,polycis-polyprenyl diphosphate synthase [EC:2.5.1.87] | (RefSeq) dehydrodolichyl diphosphate synthase 2-like (A)	dehydrodolichyl diphosphate synthase 2-like [Chenopodium quinoa]	RecName: Full=Dehydrodolichyl diphosphate synthase 2; Short=Dedol-PP synthase 2; EC=2.5.1.-;	RecName: Full=Alkyl transferase {ECO:0000256|RuleBase:RU363018}; EC=2.5.1.- {ECO:0000256|RuleBase:RU363018};	Cis-prenyltransferase	GO:0009507,chloroplast; GO:0009570,chloroplast stroma; GO:0005829,cytosol; GO:0002094,polyprenyltransferase activity; GO:0009668,plastid membrane organization; GO:0016094,polyprenol biosynthetic process; GO:0006486,protein glycosylation	Putative undecaprenyl diphosphate synthase
gene-LOC110688278	4.89	5.83	6.22	10.05	8.35	11.68	179	223	237	375	351	421	2.309	1.207	8.92525e-07	2.11367e-05	up	NW_018743920.1	7133290	7135942	-	LOC110688278	--	K15535 phosphoglucan, water dikinase [EC:2.7.9.5] | (RefSeq) PWD1; phosphoglucan water dikinase (A)	uncharacterized protein LOC110688278 [Chenopodium quinoa]	RecName: Full=Phosphoglucan, water dikinase, chloroplastic; EC=2.7.9.5; Flags: Precursor;	SubName: Full=Uncharacterized protein {ECO:0000313|EMBL:KNA24158.1};	--	GO:0009507,chloroplast; GO:0009570,chloroplast stroma; GO:0009536,plastid; GO:0102217,6-phosphoglucan, water dikinase activity; GO:0005524,ATP binding; GO:0019200,carbohydrate kinase activity; GO:0046872,metal ion binding; GO:0051752,phosphoglucan, water dikinase activity; GO:2001070,starch binding; GO:0046777,protein autophosphorylation; GO:0005983,starch catabolic process; GO:0005982,starch met…	Starch binding domain
gene-LOC110688287	0.84	0.28	0.77	1.86	1.54	1.33	20	7	19	45	42	31	3.169	1.664	0.00311418	0.0183305	up	NW_018743920.1	7180440	7184858	+	LOC110688287	--	K02941 large subunit ribosomal protein LP0 | (RefSeq) 60S acidic ribosomal protein P0-3-like (A)	60S acidic ribosomal protein P0-3-like [Chenopodium quinoa]	RecName: Full=60S acidic ribosomal protein P0-1;	SubName: Full=60S acidic ribosomal protein P0-1 {ECO:0000313|EMBL:PKU87266.1};	60S acidic ribosomal protein P0	GO:0022626,cytosolic ribosome; GO:0003735,structural constituent of ribosome; GO:0042254,ribosome biogenesis	Ribosomal protein L10
gene-LOC110688306	0.18	0.12	0.32	3.3	3.51	3.11	7	5	13	132	158	120	20.721	4.373	3.35252e-22	9.86845e-20	up	NW_018743920.1	7416364	7419334	-	LOC110688306	--	K05909 laccase [EC:1.10.3.2] | (RefSeq) laccase-4-like (A)	laccase-4-like [Chenopodium quinoa]	RecName: Full=Laccase-4; EC=1.10.3.2; AltName: Full=Benzenediol:oxygen oxidoreductase 4; AltName: Full=Diphenol oxidase 4; AltName: Full=Protein IRREGULAR XYLEM 12; AltName: Full=Urishiol oxidase 4; Flags: Precursor;	RecName: Full=Laccase {ECO:0000256|RuleBase:RU361119}; EC=1.10.3.2 {ECO:0000256|RuleBase:RU361119}; AltName: Full=Benzenediol:oxygen oxidoreductase {ECO:0000256|RuleBase:RU361119}; AltName: Full=Diphenol oxidase {ECO:0000256|RuleBase:RU361119}; AltName: Full=Urishiol oxidase {ECO:0000256|RuleBase:RU361119};	Multicopper oxidases	GO:0048046,apoplast; GO:0005507,copper ion binding; GO:0052716,hydroquinone:oxygen oxidoreductase activity; GO:0016491,oxidoreductase activity; GO:0016722,oxidoreductase activity, oxidizing metal ions; GO:0009809,lignin biosynthetic process; GO:0046274,lignin catabolic process; GO:0009834,plant-type secondary cell wall biogenesis	Multicopper oxidase
gene-LOC110688344	9.08	5.19	16.04	21.59	31.89	32.96	174	104	320	422	702	622	3.67	1.876	8.36929e-05	0.00102283	up	NW_018743920.1	7757230	7758259	+	LOC110688344	--	K14686 solute carrier family 31 (copper transporter), member 1 | (RefSeq) copper transporter 6-like (A)	copper transporter 6-like [Chenopodium quinoa]	RecName: Full=Copper transporter 6; Short=AtCOPT6;	SubName: Full=Uncharacterized protein {ECO:0000313|EMBL:KNA10675.1};	Copper transporter	GO:0016021,integral component of membrane; GO:0005773,vacuole; GO:0005375,copper ion transmembrane transporter activity	Ctr copper transporter family
gene-LOC110688347	33.75	31.51	39.19	41.01	57.93	76.59	620	605	749	768	1222	1385	2.212	1.145	0.000592578	0.00500048	up	NW_018743920.1	7761505	7763399	+	LOC110688347	--	--	universal stress protein PHOS34-like [Chenopodium quinoa]	RecName: Full=Universal stress protein A-like protein;	SubName: Full=Uncharacterized protein {ECO:0000313|EMBL:ESW04023.1};	--	GO:0005886,plasma membrane; GO:0016208,AMP binding; GO:0006950,response to stress	Universal stress protein family
gene-LOC110688348	3.04	1.85	7.37	6.26	22.63	17.18	69	44	174	145	590	384	4.914	2.297	0.00042257	0.00381173	up	NW_018743920.1	7769499	7772202	-	LOC110688348	--	--	uncharacterized protein LOC110688348 [Chenopodium quinoa]	--	SubName: Full=Uncharacterized protein {ECO:0000313|EMBL:KNA03155.1};	--	--	--
gene-LOC110688356	1.78	2.71	1.69	6.3	2.7	2.05	74	118	73	267	129	84	2.271	1.183	0.00530045	0.0274101	up	NW_018743920.1	7826316	7829648	-	LOC110688356	--	K14497 protein phosphatase 2C [EC:3.1.3.16] | (RefSeq) probable protein phosphatase 2C 24 isoform X1 (A)	probable protein phosphatase 2C 24 isoform X1 [Chenopodium quinoa]	RecName: Full=Protein phosphatase 2C 3; Short=AtPP2C03; EC=3.1.3.16; AltName: Full=Protein AKT1-INTERACTING 1; AltName: Full=Protein phosphatase 2C AIP1; Short=PP2C AIP1;	SubName: Full=Uncharacterized protein {ECO:0000313|EMBL:KNA15599.1};	Serine/threonine protein phosphatase	GO:0005886,plasma membrane; GO:0046872,metal ion binding; GO:0005267,potassium channel activity; GO:0004722,protein serine/threonine phosphatase activity; GO:0009788,negative regulation of abscisic acid-activated signaling pathway; GO:1902039,negative regulation of seed dormancy process; GO:0009939,positive regulation of gibberellic acid mediated signaling pathway; GO:0010030,positive regulation …	Protein phosphatase 2C
gene-LOC110688361	49.94	43.13	63.55	67.4	88.6	86.14	2624	2369	3474	3610	5346	4455	2.013	1.01	0.000554268	0.00473124	up	NW_018743920.1	7881508	7885493	-	LOC110688361	--	--	protein plastid transcriptionally active 16, chloroplastic-like isoform X1 [Chenopodium quinoa]	RecName: Full=Protein plastid transcriptionally active 16, chloroplastic {ECO:0000303|PubMed:16326926}; Short=pTAC16 {ECO:0000303|PubMed:16326926}; Flags: Precursor;	SubName: Full=Uncharacterized protein {ECO:0000313|EMBL:KNA20011.1};	Predicted dehydrogenase	GO:0009507,chloroplast; GO:0009941,chloroplast envelope; GO:0042644,chloroplast nucleoid; GO:0009534,chloroplast thylakoid; GO:0009535,chloroplast thylakoid membrane; GO:0016020,membrane; GO:0009295,nucleoid; GO:0009508,plastid chromosome; GO:0098572,stromal side of plastid thylakoid membrane; GO:0007623,circadian rhythm	NAD(P)H-binding
gene-LOC110688365	0.02	0	0	0.08	0.13	0.1	1	0	0	4	8	5	20.26	4.341	0.00979678	0.0438649	up	NW_018743920.1	7922397	7925203	-	LOC110688365	--	--	--	--	--	--	--	--
gene-LOC110688367	0.37	0.32	0.49	0.69	1.09	0.67	17	15	23	32	57	30	2.728	1.448	0.00447549	0.0240793	up	NW_018743920.1	7930726	7933165	-	LOC110688367	--	K01176 alpha-amylase [EC:3.2.1.1] | (RefSeq) lectin-domain containing receptor kinase VI.3-like (A)	L-type lectin-domain containing receptor kinase IV.2-like [Chenopodium quinoa]	RecName: Full=L-type lectin-domain containing receptor kinase IV.2 {ECO:0000303|PubMed:19773388}; Short=Arabidopsis thaliana lectin-receptor kinase a4 {ECO:0000303|PubMed:19773388}; Short=AthlecRK-a4 {ECO:0000303|Ref.6}; Short=LecRK-IV.2 {ECO:0000303|PubMed:19773388}; EC=2.7.11.1 {ECO:0000255|PROSITE-ProRule:PRU00159}; AltName: Full=Protein SMALL, GLUED-TOGETHER, AND COLLAPSED POLLEN {ECO:0000303…	SubName: Full=Uncharacterized protein {ECO:0000313|EMBL:KNA20182.1};	--	GO:0016021,integral component of membrane; GO:0005886,plasma membrane; GO:0005524,ATP binding; GO:0030246,carbohydrate binding; GO:0004674,protein serine/threonine kinase activity; GO:0042742,defense response to bacterium; GO:0009555,pollen development	Legume lectin domain
gene-LOC110688372	1.18	1.5	0.95	2.44	2.73	2.81	86	114	72	181	228	201	2.903	1.538	8.42124e-09	3.23112e-07	up	NW_018743920.1	7938241	7942151	-	LOC110688372	--	K01176 alpha-amylase [EC:3.2.1.1] | (RefSeq) lectin-domain containing receptor kinase VI.3-like (A)	L-type lectin-domain containing receptor kinase IV.1-like [Chenopodium quinoa]	RecName: Full=L-type lectin-domain containing receptor kinase IV.2 {ECO:0000303|PubMed:19773388}; Short=Arabidopsis thaliana lectin-receptor kinase a4 {ECO:0000303|PubMed:19773388}; Short=AthlecRK-a4 {ECO:0000303|Ref.6}; Short=LecRK-IV.2 {ECO:0000303|PubMed:19773388}; EC=2.7.11.1 {ECO:0000255|PROSITE-ProRule:PRU00159}; AltName: Full=Protein SMALL, GLUED-TOGETHER, AND COLLAPSED POLLEN {ECO:0000303…	SubName: Full=Uncharacterized protein {ECO:0000313|EMBL:KNA02682.1};	--	GO:0016021,integral component of membrane; GO:0005886,plasma membrane; GO:0005524,ATP binding; GO:0030246,carbohydrate binding; GO:0004674,protein serine/threonine kinase activity; GO:0042742,defense response to bacterium; GO:0009555,pollen development	Legume lectin domain
gene-LOC110688374	0.59	0.32	0.52	0.84	1.28	2.57	26	15	24	38	65	112	4.31	2.108	0.00036362	0.00337201	up	NW_018743920.1	7950748	7953123	-	LOC110688374	--	K01176 alpha-amylase [EC:3.2.1.1] | (RefSeq) lectin-domain containing receptor kinase VI.3-like (A)	L-type lectin-domain containing receptor kinase IV.2-like [Chenopodium quinoa]	RecName: Full=L-type lectin-domain containing receptor kinase IV.2 {ECO:0000303|PubMed:19773388}; Short=Arabidopsis thaliana lectin-receptor kinase a4 {ECO:0000303|PubMed:19773388}; Short=AthlecRK-a4 {ECO:0000303|Ref.6}; Short=LecRK-IV.2 {ECO:0000303|PubMed:19773388}; EC=2.7.11.1 {ECO:0000255|PROSITE-ProRule:PRU00159}; AltName: Full=Protein SMALL, GLUED-TOGETHER, AND COLLAPSED POLLEN {ECO:0000303…	SubName: Full=Uncharacterized protein {ECO:0000313|EMBL:KNA02682.1};	--	GO:0016021,integral component of membrane; GO:0005886,plasma membrane; GO:0005524,ATP binding; GO:0030246,carbohydrate binding; GO:0004674,protein serine/threonine kinase activity; GO:0042742,defense response to bacterium; GO:0009555,pollen development	Legume lectin domain
gene-LOC110688386	0.98	0.85	1.38	1.66	3.04	2.02	41	37	60	71	146	83	2.748	1.459	0.00101376	0.00767924	up	NW_018743920.1	8021270	8024676	+	LOC110688386	--	K05909 laccase [EC:1.10.3.2] | (RefSeq) laccase-17-like (A)	laccase-17-like [Chenopodium quinoa]	RecName: Full=Laccase-17; EC=1.10.3.2; AltName: Full=Benzenediol:oxygen oxidoreductase 17; AltName: Full=Diphenol oxidase 17; AltName: Full=Urishiol oxidase 17; Flags: Precursor;	RecName: Full=Laccase {ECO:0000256|RuleBase:RU361119}; EC=1.10.3.2 {ECO:0000256|RuleBase:RU361119}; AltName: Full=Benzenediol:oxygen oxidoreductase {ECO:0000256|RuleBase:RU361119}; AltName: Full=Diphenol oxidase {ECO:0000256|RuleBase:RU361119}; AltName: Full=Urishiol oxidase {ECO:0000256|RuleBase:RU361119};	Multicopper oxidases	GO:0048046,apoplast; GO:0005507,copper ion binding; GO:0052716,hydroquinone:oxygen oxidoreductase activity; GO:0016491,oxidoreductase activity; GO:0016722,oxidoreductase activity, oxidizing metal ions; GO:0009809,lignin biosynthetic process; GO:0046274,lignin catabolic process; GO:0009698,phenylpropanoid metabolic process	Multicopper oxidase
gene-LOC110688414	2.49	2.64	3.83	2.64	18.96	6.94	83	92	133	90	727	228	4.312	2.108	0.0014831	0.0104157	up	NW_018743920.1	8332384	8336024	-	LOC110688414	--	K00924 kinase [EC:2.7.1.-] | (RefSeq) probable receptor-like protein kinase At3g55450 isoform X1 (A)	probable serine/threonine-protein kinase PBL10 [Chenopodium quinoa]	RecName: Full=Probable serine/threonine-protein kinase PBL10 {ECO:0000305}; EC=2.7.11.1 {ECO:0000305}; AltName: Full=PBS1-like protein 10 {ECO:0000303|PubMed:20413097}; AltName: Full=Protein kinase 1B {ECO:0000305};	SubName: Full=Uncharacterized protein {ECO:0000313|EMBL:KNA10437.1};	Serine/threonine protein kinase	GO:0005886,plasma membrane; GO:0005524,ATP binding; GO:0004713,protein tyrosine kinase activity; GO:0004675,transmembrane receptor protein serine/threonine kinase activity; GO:0007166,cell surface receptor signaling pathway; GO:0006952,defense response; GO:1902458,positive regulation of stomatal opening; GO:0006468,protein phosphorylation	Protein tyrosine kinase
gene-LOC110688420	0.99	1.7	0.9	2.27	2.14	2.87	72	129	68	168	178	205	2.69	1.428	7.53994e-06	0.000135695	up	NW_018743920.1	8392793	8398808	-	LOC110688420	--	K17710 pentatricopeptide repeat domain-containing protein 1 | (RefSeq) pentatricopeptide repeat-containing protein At2g18940, chloroplastic (A)	pentatricopeptide repeat-containing protein At1g07590, mitochondrial-like [Chenopodium quinoa]	RecName: Full=Pentatricopeptide repeat-containing protein At1g07590, mitochondrial; Flags: Precursor;	SubName: Full=Uncharacterized protein {ECO:0000313|EMBL:KNA06965.1};	FOG: PPR repeat	GO:0043231,intracellular membrane-bounded organelle; GO:0005739,mitochondrion; GO:0004519,endonuclease activity; GO:0003723,RNA binding; GO:0046686,response to cadmium ion; GO:0009451,RNA modification	PPR repeat family
gene-LOC110688422	14.08	15.67	9.11	15.96	15.52	32.95	1113	1295	749	1286	1409	2564	2.213	1.146	0.0026507	0.0162343	up	NW_018743920.1	8409795	8415699	-	LOC110688422	--	K03979 GTPase [EC:3.6.5.-] | (RefSeq) hypothetical protein (A)	probable GTP-binding protein OBGM, mitochondrial [Chenopodium quinoa]	RecName: Full=Probable GTP-binding protein OBGM, mitochondrial; Flags: Precursor;	SubName: Full=Uncharacterized protein {ECO:0000313|EMBL:KNA08995.1};	Predicted GTP-binding protein (ODN superfamily)	GO:0005739,mitochondrion; GO:0005525,GTP binding	GTP1/OBG
gene-LOC110688453	0	0	0	0.16	2.1	2.51	0	0	0	3	44	45	222.13	7.795	2.42421e-06	5.08854e-05	up	NW_018743920.1	8758332	8759851	-	LOC110688453	--	--	jasmonate-induced protein homolog [Chenopodium quinoa]	RecName: Full=Jasmonate-induced protein homolog;	SubName: Full=Uncharacterized protein {ECO:0000313|EMBL:KNA23164.1};	--	--	--
gene-LOC110688460	8.49	4.3	8.29	12.16	31.12	24.83	317	168	322	463	1335	913	4.252	2.088	1.12706e-05	0.000190618	up	NW_018743920.1	8827909	8832835	+	LOC110688460	--	--	--	--	--	--	--	--
gene-LOC110688480	0.62	0.55	0.34	0.52	6.35	8.84	14	13	8	12	165	197	14.361	3.844	9.58182e-06	0.000165683	up	NW_018743920.1	9138205	9139619	+	LOC110688480	--	K09422 transcription factor MYB, plant | (RefSeq) transcription factor MYB48-like (A)	transcription factor MYB48-like [Chenopodium quinoa]	RecName: Full=Transcription factor MYB48; AltName: Full=Myb-related protein 48; Short=AtMYB48;	SubName: Full=Uncharacterized protein {ECO:0000313|EMBL:KNA05849.1};	Transcription factor, Myb superfamily	GO:0005634,nucleus; GO:0003700,DNA-binding transcription factor activity; GO:0000981,DNA-binding transcription factor activity, RNA polymerase II-specific; GO:0043565,sequence-specific DNA binding; GO:0001135,RNA polymerase II transcription regulator recruiting activity; GO:0044212,transcription regulatory region DNA binding; GO:0030154,cell differentiation; GO:0006357,regulation of transcription…	Myb-like DNA-binding domain
gene-LOC110688482	1.35	0.31	0.31	2.17	1.93	6.69	25	6	6	41	41	122	7.178	2.844	0.000385149	0.00352909	up	NW_018743920.1	9150875	9152231	-	LOC110688482	--	K09873 aquaporin TIP | (RefSeq) aquaporin TIP1-3-like (A)	aquaporin TIP1-3-like [Chenopodium quinoa]	RecName: Full=Aquaporin TIP1-3; AltName: Full=Gamma-tonoplast intrinsic protein 3; Short=Gamma-TIP3; AltName: Full=Tonoplast intrinsic protein 1-3; Short=AtTIP1;3;	SubName: Full=Uncharacterized protein {ECO:0000313|EMBL:KNA13069.1};	Aquaporin (major intrinsic protein family)	GO:0042807,central vacuole; GO:0005887,integral component of plasma membrane; GO:0009705,plant-type vacuole membrane; GO:0015204,urea transmembrane transporter activity; GO:0015250,water channel activity; GO:0034220,ion transmembrane transport; GO:0015840,urea transport; GO:0006833,water transport	Major intrinsic protein
gene-LOC110688486	0.61	0.14	0.9	0.69	2.15	3.34	21	5	32	24	85	113	4.897	2.292	0.00483002	0.0255203	up	NW_018743920.1	9182880	9185753	-	LOC110688486	--	--	--	--	--	--	--	--
gene-LOC110688489	4.86	4.92	4.37	5.78	6.09	9.63	137	145	128	166	197	267	2	1	0.00184546	0.0123372	up	NW_018743920.1	9200168	9202335	-	LOC110688489	--	K14292 trimethylguanosine synthase [EC:2.1.1.-] | (RefSeq) trimethylguanosine synthase (A)	protein SODIUM POTASSIUM ROOT DEFECTIVE 1-like [Chenopodium quinoa]	RecName: Full=Protein SODIUM POTASSIUM ROOT DEFECTIVE 1 {ECO:0000303|PubMed:21193571}; Short=NaKR1 {ECO:0000303|PubMed:21193571}; AltName: Full=Heavy metal-associated plant protein 2 {ECO:0000303|PubMed:23368984}; Short=AtHPP02 {ECO:0000303|PubMed:23368984}; AltName: Full=Nuclear-enriched phloem companion cell gene 6 {ECO:0000303|PubMed:18354040}; Short=NPCC6 {ECO:0000303|PubMed:18354040};	SubName: Full=Uncharacterized protein {ECO:0000313|EMBL:KNA04420.1};	Copper chaperone	GO:0005737,cytoplasm; GO:0005783,endoplasmic reticulum; GO:0005634,nucleus; GO:0046872,metal ion binding; GO:0046914,transition metal ion binding; GO:0046916,cellular transition metal ion homeostasis; GO:0009908,flower development; GO:0030001,metal ion transport; GO:0010233,phloem transport; GO:0010015,root morphogenesis; GO:0055078,sodium ion homeostasis	Heavy-metal-associated domain
gene-LOC110688502	0.35	0.44	0.36	0.6	1.03	1.23	12	16	13	21	41	42	3.315	1.729	0.0016513	0.0113103	up	NW_018743920.1	9368318	9372179	+	LOC110688502	--	K13447 respiratory burst oxidase [EC:1.6.3.- 1.11.1.-] | (RefSeq) respiratory burst oxidase homolog protein C-like (A)	putative respiratory burst oxidase homolog protein J isoform X1 [Chenopodium quinoa]	RecName: Full=Putative respiratory burst oxidase homolog protein H; EC=1.11.1.-; EC=1.6.3.-; AltName: Full=NADPH oxidase RBOHH; Short=AtRBOHH;	SubName: Full=Uncharacterized protein {ECO:0000313|EMBL:KNA20612.1};	Ferric reductase, NADH/NADPH oxidase and related proteins	GO:0016021,integral component of membrane; GO:0005509,calcium ion binding; GO:0050664,oxidoreductase activity, acting on NAD(P)H, oxygen as acceptor; GO:0004601,peroxidase activity	Ferric reductase NAD binding domain
gene-LOC110688515	8.2	4.76	8.95	11.67	19.66	23.55	244	148	277	354	672	690	3.275	1.712	5.73195e-05	0.00074859	up	NW_018743920.1	9563171	9567007	+	LOC110688515	--	--	shewanella-like protein phosphatase 1 isoform X1 [Chenopodium quinoa]	RecName: Full=Shewanella-like protein phosphatase 1 {ECO:0000303|PubMed:21976480}; Short=AtSLP1 {ECO:0000303|PubMed:21976480}; EC=3.1.-.- {ECO:0000305}; Flags: Precursor;	SubName: Full=Uncharacterized protein {ECO:0000313|EMBL:KNA08919.1};	Serine/threonine specific protein phosphatase PP1, catalytic subunit	GO:0009507,chloroplast; GO:0030145,manganese ion binding; GO:0016791,phosphatase activity; GO:0004721,phosphoprotein phosphatase activity	Calcineurin-like phosphoesterase
gene-LOC110688520	20.53	13.92	23.74	27.89	37.13	34.41	759	538	913	1051	1576	1252	2.215	1.147	0.000457994	0.00406126	up	NW_018743920.1	9577495	9580858	+	LOC110688520	--	K17508 protein phosphatase PTC7 [EC:3.1.3.16] | (RefSeq) probable protein phosphatase 2C 26 isoform X1 (A)	probable protein phosphatase 2C 26 isoform X1 [Chenopodium quinoa]	RecName: Full=Probable protein phosphatase 2C 26; Short=AtPP2C26; EC=3.1.3.16;	SubName: Full=Uncharacterized protein {ECO:0000313|EMBL:KNA13092.1};	Serine/threonine protein phosphatase	GO:0009507,chloroplast; GO:0009570,chloroplast stroma; GO:0046872,metal ion binding; GO:0004721,phosphoprotein phosphatase activity; GO:0071482,cellular response to light stimulus; GO:0035970,peptidyl-threonine dephosphorylation; GO:0010027,thylakoid membrane organization	Protein phosphatase 2C
gene-LOC110688521	1872.57	1809.51	2643.58	2950.17	3263.47	3824.06	35449	35803	52058	56929	70938	71251	2.061	1.044	0.000223895	0.00229673	up	NW_018743920.1	9575910	9576926	-	LOC110688521	--	K08912 light-harvesting complex II chlorophyll a/b binding protein 1 | (RefSeq) chlorophyll a-b binding protein, chloroplastic (A)	chlorophyll a-b binding protein, chloroplastic [Chenopodium quinoa]	RecName: Full=Chlorophyll a-b binding protein, chloroplastic; AltName: Full=LHCII type I CAB; Short=LHCP; Flags: Precursor;	RecName: Full=Chlorophyll a-b binding protein, chloroplastic {ECO:0000256|RuleBase:RU363080};	--	GO:0009535,chloroplast thylakoid membrane; GO:0016021,integral component of membrane; GO:0009522,photosystem I; GO:0009523,photosystem II; GO:0016168,chlorophyll binding; GO:0046872,metal ion binding; GO:0009765,photosynthesis, light harvesting; GO:0018298,protein-chromophore linkage	Chlorophyll A-B binding protein
gene-LOC110688533	336.74	183.54	267.9	1306.18	1298.99	1469.15	10236	5831	8471	40472	45339	43954	6.661	2.736	2.44301e-19	5.32069e-17	up	NW_018742309.1	5293395	5299115	-	LOC110688533	--	K00499 choline monooxygenase [EC:1.14.15.7] | (RefSeq) choline monooxygenase, chloroplastic-like (A)	choline monooxygenase, chloroplastic-like [Chenopodium quinoa]	RecName: Full=Choline monooxygenase, chloroplastic; EC=1.14.15.7; Flags: Precursor;	SubName: Full=Choline monooxygenase {ECO:0000313|EMBL:AFG28558.1};	--	GO:0009570,chloroplast stroma; GO:0051537,2 iron, 2 sulfur cluster binding; GO:0019133,choline monooxygenase activity; GO:0005506,iron ion binding; GO:0016708,oxidoreductase activity, acting on paired donors, with incorporation or reduction of molecular oxygen, NAD(P)H as one donor, and incorporation of two atoms of oxygen into one donor; GO:0019439,aromatic compound catabolic process; GO:0019285…	Ring hydroxylating alpha subunit (catalytic domain)
gene-LOC110688538	2.7	4.62	3.01	7.11	6.81	10.11	19	34	22	51	55	70	3.073	1.62	0.000111994	0.00130077	up	NW_018743920.1	4382786	4383163	+	LOC110688538	--	K07441 beta-1,4-N-acetylglucosaminyltransferase [EC:2.4.1.141] | (RefSeq) UDP-N-acetylglucosamine transferase subunit ALG14 homolog (A)	auxin-responsive protein SAUR41-like [Chenopodium quinoa]	RecName: Full=Auxin-responsive protein SAUR41 {ECO:0000305}; AltName: Full=Protein SMALL AUXIN UP RNA 41 {ECO:0000303|PubMed:12036261};	SubName: Full=Uncharacterized protein {ECO:0000313|EMBL:KNA03323.1};	--	GO:0005737,cytoplasm; GO:0060918,auxin transport; GO:0009734,auxin-activated signaling pathway; GO:0009958,positive gravitropism; GO:0040008,regulation of growth; GO:0090057,root radial pattern formation	Auxin responsive protein
gene-LOC110688563	111.48	84.21	111.48	193.41	279.47	350.19	5576	4402	5800	9861	16050	17239	3.517	1.814	5.26915e-08	1.73357e-06	up	NW_018742309.1	5450459	5455786	+	LOC110688563	--	K00521 ferric-chelate reductase [EC:1.16.1.7] | (RefSeq) ferric reduction oxidase 7, chloroplastic-like (A)	ferric reduction oxidase 7, chloroplastic-like [Chenopodium quinoa]	RecName: Full=Ferric reduction oxidase 7, chloroplastic; Short=AtFRO7; EC=1.16.1.7; AltName: Full=Ferric-chelate reductase 7; Flags: Precursor;	SubName: Full=Uncharacterized protein {ECO:0000313|EMBL:KNA10876.1};	Ferric reductase, NADH/NADPH oxidase and related proteins	GO:0009507,chloroplast; GO:0031969,chloroplast membrane; GO:0016021,integral component of membrane; GO:0000293,ferric-chelate reductase activity; GO:0046872,metal ion binding; GO:0006811,ion transport; GO:0009767,photosynthetic electron transport chain	Ferric reductase NAD binding domain
gene-LOC110688574	7.78	7.79	32.08	38.99	112.92	74.52	471	493	2020	2406	7849	4440	6.166	2.624	4.42636e-05	0.000606681	up	NW_018743920.1	6565455	6576506	+	LOC110688574	--	K16297 serine carboxypeptidase-like clade II [EC:3.4.16.-] | (RefSeq) uncharacterized protein LOC110761164 (A)	uncharacterized protein LOC110688574 [Chenopodium quinoa]	RecName: Full=Serine carboxypeptidase II-3; EC=3.4.16.6; AltName: Full=CP-MII.3; Contains: RecName: Full=Serine carboxypeptidase II-3 chain A; Contains: RecName: Full=Serine carboxypeptidase II-3 chain B; Flags: Precursor;	SubName: Full=Uncharacterized protein {ECO:0000313|EMBL:GAY39463.1};	Serine carboxypeptidases (lysosomal cathepsin A)	GO:0004185,serine-type carboxypeptidase activity	Serine carboxypeptidase
gene-LOC110688616	0.11	0	0.07	0.21	0.22	0.64	6	0	4	11	13	33	7.293	2.867	0.00798531	0.0375994	up	NW_018743920.1	9260127	9263931	-	LOC110688616	--	K11778 ditrans,polycis-polyprenyl diphosphate synthase [EC:2.5.1.87] | (RefSeq) dehydrodolichyl diphosphate synthase 2-like (A)	dehydrodolichyl diphosphate synthase 2-like [Chenopodium quinoa]	RecName: Full=Dehydrodolichyl diphosphate synthase 2; Short=Dedol-PP synthase 2; EC=2.5.1.-;	RecName: Full=Alkyl transferase {ECO:0000256|RuleBase:RU363018}; EC=2.5.1.- {ECO:0000256|RuleBase:RU363018};	Cis-prenyltransferase	GO:0009507,chloroplast; GO:0009570,chloroplast stroma; GO:0005829,cytosol; GO:0002094,polyprenyltransferase activity; GO:0009668,plastid membrane organization; GO:0016094,polyprenol biosynthetic process; GO:0006486,protein glycosylation	Putative undecaprenyl diphosphate synthase
gene-LOC110688699	0	0	0	0.62	0.54	0.68	0	0	0	44	43	47	311.555	8.283	9.28987e-11	5.31144e-09	up	NW_018743937.1	1594221	1599553	-	LOC110688699	--	K05349 beta-glucosidase [EC:3.2.1.21] | (RefSeq) probable beta-glucosidase F (A)	uncharacterized protein LOC110688699 isoform X1 [Chenopodium quinoa]	--	SubName: Full=Uncharacterized protein {ECO:0000313|EMBL:KNA19270.1};	--	--	--
gene-LOC110688705	0.02	0	0	0.51	0.06	0.3	1	0	0	21	3	12	42.226	5.4	0.000847712	0.00668342	up	NW_018743937.1	1800033	1812604	+	LOC110688705	--	--	uncharacterized protein LOC110688705 isoform X1 [Chenopodium quinoa]	--	SubName: Full=Uncharacterized protein {ECO:0000313|EMBL:KNA05129.1};	--	--	--
gene-LOC110688707	0.29	0.4	0.36	1.1	1.36	1.09	26	38	34	102	142	97	4.459	2.157	1.07092e-10	6.05808e-09	up	NW_018743937.1	1830929	1838388	-	LOC110688707	--	K00620 glutamate N-acetyltransferase / amino-acid N-acetyltransferase [EC:2.3.1.35 2.3.1.1] | (RefSeq) arginine biosynthesis bifunctional protein ArgJ, chloroplastic-like (A)	uncharacterized protein LOC110688707 isoform X1 [Chenopodium quinoa]	RecName: Full=Arginine biosynthesis bifunctional protein ArgJ, chloroplastic {ECO:0000255|HAMAP-Rule:MF_03124}; Includes: RecName: Full=Glutamate N-acetyltransferase {ECO:0000255|HAMAP-Rule:MF_03124}; Short=GAT {ECO:0000255|HAMAP-Rule:MF_03124}; EC=2.3.1.35 {ECO:0000255|HAMAP-Rule:MF_03124}; AltName: Full=Ornithine acetyltransferase {ECO:0000255|HAMAP-Rule:MF_03124}; Short=OATase {ECO:0000255|HAM…	RecName: Full=Arginine biosynthesis bifunctional protein ArgJ, chloroplastic {ECO:0000256|HAMAP-Rule:MF_03124}; Includes: RecName: Full=Amino-acid acetyltransferase {ECO:0000256|HAMAP-Rule:MF_03124}; EC=2.3.1.1 {ECO:0000256|HAMAP-Rule:MF_03124}; AltName: Full=N-acetylglutamate synthase {ECO:0000256|HAMAP-Rule:MF_03124}; Short=AGS {ECO:0000256|HAMAP-Rule:MF_03124}; Includes: RecName: Full=Glutamat…	--	GO:0009507,chloroplast; GO:0004042,acetyl-CoA:L-glutamate N-acetyltransferase activity; GO:0004358,glutamate N-acetyltransferase activity; GO:0103045,methione N-acyltransferase activity; GO:0006526,arginine biosynthetic process	--
gene-LOC110688738	0	0	0	5.01	2.85	2.11	0	0	0	194	124	79	896	9.807	6.05867e-15	6.89664e-13	up	NW_018743937.1	3574337	3577326	+	LOC110688738	--	--	--	--	--	--	--	--
gene-LOC110688740	0.2	0.09	0.08	1.02	0.23	0.46	12	6	5	64	16	28	5.8	2.536	0.000544888	0.00467341	up	NW_018743937.1	3589853	3593975	-	LOC110688740	--	K17604 zinc finger SWIM domain-containing protein 3 | (RefSeq) protein FAR-RED IMPAIRED RESPONSE 1-like (A)	protein FAR1-RELATED SEQUENCE 8-like [Chenopodium quinoa]	RecName: Full=Protein FAR-RED IMPAIRED RESPONSE 1;	SubName: Full=Uncharacterized protein {ECO:0000313|EMBL:ONH89763.1};	--	GO:0005634,nucleus; GO:0003700,DNA-binding transcription factor activity; GO:0008270,zinc ion binding; GO:0010018,far-red light signaling pathway; GO:0042753,positive regulation of circadian rhythm; GO:0045893,positive regulation of transcription, DNA-templated; GO:0010017,red or far-red light signaling pathway; GO:0009585,red, far-red light phototransduction; GO:0010218,response to far red light…	MULE transposase domain
gene-LOC110688746	1.83	0.83	2.07	3.34	5.37	3.55	120	57	141	223	404	229	3.343	1.741	0.000139079	0.00155036	up	NW_018743937.1	3872273	3876080	+	LOC110688746	--	K00924 kinase [EC:2.7.1.-] | (RefSeq) receptor-like protein kinase HSL1 isoform X1 (A)	receptor protein-tyrosine kinase CEPR1-like [Chenopodium quinoa]	RecName: Full=Receptor protein-tyrosine kinase CEPR1 {ECO:0000303|PubMed:25324386}; EC=2.7.10.1 {ECO:0000255|PROSITE-ProRule:PRU10027}; AltName: Full=Protein C-TERMINALLY ENCODED PEPTIDE RECEPTOR 1 {ECO:0000303|PubMed:25324386}; AltName: Full=Protein XYLEM INTERMIXED WITH PHLOEM 1 {ECO:0000303|PubMed:21853254}; Flags: Precursor;	SubName: Full=Uncharacterized protein {ECO:0000313|EMBL:KNA19097.1};	--	GO:0016021,integral component of membrane; GO:0005886,plasma membrane; GO:0005524,ATP binding; GO:0042277,peptide binding; GO:0017046,peptide hormone binding; GO:0001653,peptide receptor activity; GO:0004674,protein serine/threonine kinase activity; GO:0004714,transmembrane receptor protein tyrosine kinase activity; GO:0010311,lateral root formation; GO:1902025,nitrate import; GO:1901333,positive…	Protein kinase domain
gene-LOC110688793	0.99	1.12	1.79	1.96	3.06	3.5	43	51	81	87	153	150	2.869	1.52	0.000511129	0.00443127	up	NW_018742309.1	6291617	6293955	-	LOC110688793	--	K22733 magnesium transporter | (RefSeq) uncharacterized protein LOC105630380 (A)	FK506-binding protein 5-like [Chenopodium quinoa]	RecName: Full=Protein SRC2 homolog {ECO:0000305}; Short=AtSRC2 {ECO:0000303|PubMed:16227454};	SubName: Full=Uncharacterized protein {ECO:0000313|EMBL:KNA16743.1};	--	GO:0005783,endoplasmic reticulum; GO:0005789,endoplasmic reticulum membrane; GO:0016021,integral component of membrane; GO:0005886,plasma membrane; GO:0000326,protein storage vacuole; GO:0032586,protein storage vacuole membrane; GO:0006623,protein targeting to vacuole	C2 domain
gene-LOC110688813	1.01	0.57	0.92	2.45	2.23	1.33	17	10	16	42	43	22	3.086	1.626	0.00205525	0.013372	up	NW_018743942.1	736962	737988	-	LOC110688813	--	K13993 HSP20 family protein | (RefSeq) inactive protein RESTRICTED TEV MOVEMENT 2-like (A)	inactive protein RESTRICTED TEV MOVEMENT 2-like [Chenopodium quinoa]	RecName: Full=Inactive protein RESTRICTED TEV MOVEMENT 2; AltName: Full=Inactive restricted tobacco etch virus movement protein 2;	SubName: Full=Uncharacterized protein {ECO:0000313|EMBL:KNA13765.1};	Molecular chaperone (small heat-shock protein Hsp26/Hsp42)	GO:0016021,integral component of membrane; GO:0005886,plasma membrane; GO:0006952,defense response	Hsp20/alpha crystallin family
gene-LOC110688815	0	0	0	4.97	1.96	1.43	0	0	0	36	16	10	138.538	7.114	1.27533e-06	2.90171e-05	up	NW_018742312.1	148322	149400	+	LOC110688815	--	--	--	--	--	--	--	--
gene-LOC110688837	0	0	0	0	0.88	1.38	0	0	0	0	20	27	114.999	6.845	0.00135601	0.00971513	up	NW_018743942.1	1554882	1565411	+	LOC110688837	--	--	--	--	--	--	--	--
gene-LOC110688848	2.3	4.22	6.88	8.46	10.89	7.69	61	117	190	229	332	201	2.62	1.39	0.00182573	0.0122359	up	NW_018743942.1	1805384	1812642	-	LOC110688848	--	K14493 gibberellin receptor GID1 [EC:3.-.-.-] | (RefSeq) GID1b-1; hypothetical protein (A)	probable carboxylesterase 15 [Chenopodium quinoa]	RecName: Full=Probable carboxylesterase 15; AltName: Full=AtCXE15; EC=3.1.1.1;	SubName: Full=Uncharacterized protein {ECO:0000313|EMBL:KNA15661.1};	Arylacetamide deacetylase	GO:0052689,carboxylic ester hydrolase activity; GO:0016787,hydrolase activity; GO:0009056,catabolic process	alpha/beta hydrolase fold
gene-LOC110688854	2.07	2.06	2.84	3.46	4.27	4.2	75	78	107	128	178	150	2.236	1.161	0.000343384	0.00322934	up	NW_018742312.1	110970	117274	+	LOC110688854	--	K14431 transcription factor TGA | (RefSeq) transcription factor TGA7-like (A)	transcription factor TGA7-like [Chenopodium quinoa]	RecName: Full=Transcription factor TGA1; AltName: Full=DNA-binding protein TGA1a-like protein; AltName: Full=bZIP transcription factor 47; Short=AtbZIP47;	SubName: Full=Uncharacterized protein {ECO:0000313|EMBL:KNA12781.1};	--	GO:0005634,nucleus; GO:0003700,DNA-binding transcription factor activity; GO:0043565,sequence-specific DNA binding; GO:0044212,transcription regulatory region DNA binding; GO:0042742,defense response to bacterium; GO:0006351,transcription, DNA-templated	Seed dormancy control
gene-LOC110688859	0.1	0.03	0.08	0.27	0.59	0.35	6	2	5	17	41	21	7.633	2.932	0.000134378	0.00150688	up	NW_018743942.1	2114129	2119287	+	LOC110688859	--	--	--	--	--	--	--	--
gene-LOC110688861	9.2	8.99	9.52	9.99	19.47	25.71	234	239	252	259	569	644	2.655	1.409	0.000563026	0.00479948	up	NW_018742312.1	151027	155085	+	LOC110688861	--	K14431 transcription factor TGA | (RefSeq) transcription factor TGA7, putative (A)	uncharacterized protein LOC110688861 isoform X1 [Chenopodium quinoa]	--	SubName: Full=Uncharacterized protein {ECO:0000313|EMBL:KNA08894.1};	Molecular chaperone (DnaJ superfamily)	--	DnaJ domain
gene-LOC110688862	14.11	12.07	17.75	18.43	31.81	27.39	739	661	967	984	1913	1412	2.319	1.213	0.000423732	0.00382038	up	NW_018743942.1	2507480	2516099	+	LOC110688862	--	K05681 ATP-binding cassette, subfamily G (WHITE), member 2 | (RefSeq) ABC transporter G family member 9-like (A)	ABC transporter G family member 22-like [Chenopodium quinoa]	RecName: Full=ABC transporter G family member 22; Short=ABC transporter ABCG.22; Short=AtABCG22; AltName: Full=White-brown complex homolog protein 23; Short=AtWBC23;	SubName: Full=Uncharacterized protein {ECO:0000313|EMBL:KNA16268.1};	Transporter, ABC superfamily (Breast cancer resistance protein)	GO:0016021,integral component of membrane; GO:0005886,plasma membrane; GO:0005524,ATP binding; GO:0042626,ATPase activity, coupled to transmembrane movement of substances; GO:0009414,response to water deprivation; GO:0010148,transpiration	ABC-2 type transporter
gene-LOC110688937	0.04	0.09	0.04	3.1	2.25	2.03	1	2	1	71	58	45	55.275	5.789	3.49983e-12	2.5958e-10	up	NW_018743946.1	71090	73504	-	LOC110688937	--	--	--	--	--	--	--	--
gene-LOC110688954	0.03	0.02	0.07	0.46	0.16	0.16	1	1	3	18	7	6	7.615	2.929	0.00795088	0.0374982	up	NW_018743946.1	969726	994967	+	LOC110688954	--	K13065 shikimate O-hydroxycinnamoyltransferase [EC:2.3.1.133] | (RefSeq) shikimate O-hydroxycinnamoyltransferase-like (A)	shikimate O-hydroxycinnamoyltransferase-like [Chenopodium quinoa]	RecName: Full=Shikimate O-hydroxycinnamoyltransferase; EC=2.3.1.133; AltName: Full=Hydroxycinnamoyl transferase; AltName: Full=Hydroxycinnamoyl-Coenzyme A shikimate/quinate hydroxycinnamoyltransferase;	SubName: Full=Uncharacterized protein {ECO:0000313|EMBL:CCB45012.1};	--	GO:0047172,shikimate O-hydroxycinnamoyltransferase activity	Transferase family
gene-LOC110688956	30.72	26.72	39.92	50.33	48.75	58.99	1864	1695	2520	3113	3397	3523	2.098	1.069	7.51765e-05	0.000936055	up	NW_018743946.1	1007699	1018369	-	LOC110688956	--	K00703 starch synthase [EC:2.4.1.21] | (RefSeq) granule-bound starch synthase 2, chloroplastic/amyloplastic-like (A)	granule-bound starch synthase 2, chloroplastic/amyloplastic-like [Chenopodium quinoa]	RecName: Full=Granule-bound starch synthase 2, chloroplastic/amyloplastic; EC=2.4.1.21; AltName: Full=Granule-bound starch synthase II; Short=GBSS-II; Short=SS II; Flags: Precursor;	RecName: Full=Starch synthase, chloroplastic/amyloplastic {ECO:0000256|RuleBase:RU361232}; EC=2.4.1.- {ECO:0000256|RuleBase:RU361232};	--	GO:0009501,amyloplast; GO:0009507,chloroplast; GO:0033201,alpha-1,4-glucan synthase activity; GO:0004373,glycogen (starch) synthase activity; GO:0009011,starch synthase activity; GO:0019252,starch biosynthetic process	Starch synthase catalytic domain
gene-LOC110688971	36.86	18.21	26.19	45.07	61.31	49.55	767	396	567	956	1465	1015	2.489	1.316	0.000208602	0.00216126	up	NW_018743946.1	1544866	1561794	-	LOC110688971	--	K09874 aquaporin NIP | (RefSeq) aquaporin NIP2-1-like (A)	aquaporin NIP2-1-like [Chenopodium quinoa]	RecName: Full=Aquaporin NIP2-1; AltName: Full=NOD26-like intrinsic protein 2-1; AltName: Full=ZmNIP2-1; AltName: Full=ZmNIP2;1;	SubName: Full=Uncharacterized protein {ECO:0000313|EMBL:OAY60170.1};	Aquaporin (major intrinsic protein family)	GO:0016021,integral component of membrane; GO:0015267,channel activity; GO:0015840,urea transport	Major intrinsic protein
gene-LOC110688978	1.61	2.45	2.23	4.71	2.23	5.2	41	65	59	122	65	130	2.492	1.317	0.00119796	0.00878661	up	NW_018743946.1	2103340	2104704	-	LOC110688978	--	K02183 calmodulin | (RefSeq) probable calcium-binding protein CML45 (A)	probable calcium-binding protein CML45 [Chenopodium quinoa]	RecName: Full=Probable calcium-binding protein CML45; AltName: Full=Calmodulin-like protein 45;	SubName: Full=Uncharacterized protein {ECO:0000313|EMBL:KDO37337.1};	Calmodulin and related proteins (EF-Hand superfamily)	GO:0005509,calcium ion binding	EF hand
gene-LOC110689001	0	0	0	0.06	0	0.68	0	0	0	3	0	31	86.347	6.432	0.00716588	0.0345754	up	NW_018743946.1	3328587	3336711	-	LOC110689001	--	K08819 cyclin-dependent kinase 12/13 [EC:2.7.11.22 2.7.11.23] | (RefSeq) probable serine/threonine-protein kinase At1g54610 (A)	probable serine/threonine-protein kinase At1g54610 [Chenopodium quinoa]	RecName: Full=Protein IMPAIRED IN BABA-INDUCED STERILITY 1 {ECO:0000303|PubMed:15722464}; EC=2.7.11.- {ECO:0000255|PROSITE-ProRule:PRU00159};	SubName: Full=probable serine/threonine-protein kinase At1g54610 {ECO:0000313|RefSeq:XP_016467950.1};	Cdc2-related protein kinase	GO:0005634,nucleus; GO:0005886,plasma membrane; GO:0005524,ATP binding; GO:0004693,cyclin-dependent protein serine/threonine kinase activity; GO:0042742,defense response to bacterium; GO:0002229,defense response to oomycetes; GO:1900426,positive regulation of defense response to bacterium; GO:1902290,positive regulation of defense response to oomycetes; GO:0006468,protein phosphorylation; GO:2000…	Protein kinase domain
gene-LOC110689008	0	0	0	0.63	0.34	0.21	0	0	0	101	62	33	439.897	8.781	2.06254e-11	1.33297e-09	up	NW_018743946.1	3476508	3485148	-	LOC110689008	--	--	--	--	--	--	--	--
gene-LOC110689071	0	0	0	0.68	0.84	0.79	0	0	0	31	43	35	253.185	7.984	9.48296e-10	4.44402e-08	up	NW_018743946.1	2277082	2280332	-	LOC110689071	--	--	--	--	--	--	--	--
gene-LOC110689079	0.3	0.43	0.18	1.61	0.49	0.8	8	12	5	44	15	21	4.072	2.026	0.00257193	0.0158363	up	NW_018743951.1	6903	12584	-	LOC110689079	--	--	--	--	--	--	--	--
gene-LOC110689080	0.13	0.12	0.04	4.72	0.02	1.47	6	6	2	223	1	67	25.764	4.687	0.000106567	0.00124715	up	NW_018743951.1	27302	37167	+	LOC110689080	--	--	--	--	--	--	--	--
gene-LOC110689081	0.17	0.17	0.14	17.95	0	5.67	6	6	5	629	0	192	59.247	5.889	0.00257523	0.0158441	up	NW_018743951.1	48695	56916	-	LOC110689081	--	K15029 translation initiation factor 3 subunit L | (RefSeq) eukaryotic translation initiation factor 3 subunit L-like (A)	LOW QUALITY PROTEIN: eukaryotic translation initiation factor 3 subunit L-like [Chenopodium quinoa]	--	RecName: Full=Eukaryotic translation initiation factor 3 subunit L {ECO:0000256|HAMAP-Rule:MF_03011}; Short=eIF3l {ECO:0000256|HAMAP-Rule:MF_03011};	RNA polymerase I-associated factor - PAF67	GO:0016282,eukaryotic 43S preinitiation complex; GO:0033290,eukaryotic 48S preinitiation complex; GO:0005852,eukaryotic translation initiation factor 3 complex; GO:0003743,translation initiation factor activity; GO:0001731,formation of translation preinitiation complex; GO:0006446,regulation of translational initiation	RNA polymerase I-associated factor PAF67
gene-LOC110689082	0	0.04	0	1.57	0	1.18	0	1	0	43	0	31	87.789	6.456	0.000736169	0.00595815	up	NW_018743951.1	20811	23713	+	LOC110689082	--	K18482 4-amino-4-deoxychorismate lyase [EC:4.1.3.38] | (RefSeq) LOW QUALITY PROTEIN: D-amino-acid transaminase, chloroplastic-like (A)	LOW QUALITY PROTEIN: D-amino-acid transaminase, chloroplastic-like [Chenopodium quinoa]	RecName: Full=D-amino-acid transaminase, chloroplastic {ECO:0000303|PubMed:18318836}; EC=2.6.1.21; EC=4.1.3.38; AltName: Full=Aminodeoxychorismate lyase {ECO:0000303|PubMed:15500462}; Short=AtADCL; AltName: Full=Branched-chain-amino-acid aminotransferase-like protein 3; Flags: Precursor;	SubName: Full=D-amino-acid transaminase, chloroplastic {ECO:0000313|RefSeq:XP_018845551.1};	Branched chain aminotransferase BCAT1, pyridoxal phosphate enzymes type IV superfamily	GO:0009507,chloroplast; GO:0009570,chloroplast stroma; GO:0008696,4-amino-4-deoxychorismate lyase activity; GO:0047810,D-alanine:2-oxoglutarate aminotransferase activity; GO:0008153,para-aminobenzoic acid biosynthetic process; GO:0046654,tetrahydrofolate biosynthetic process	Amino-transferase class IV
gene-LOC110689125	1.53	1.33	1.22	3.37	3.22	3.05	53	48	44	119	128	104	3.079	1.622	7.15203e-09	2.79248e-07	up	NW_018743955.1	258099	262636	+	LOC110689125	--	--	uncharacterized protein LOC110689125 [Chenopodium quinoa]	--	SubName: Full=Uncharacterized protein {ECO:0000313|EMBL:KNA25772.1};	--	GO:0006396,RNA processing	Tetratricopeptide repeat
gene-LOC110689147	14.74	11.16	11.55	18.78	17.28	22.07	211	167	172	274	284	311	2.017	1.012	0.000125057	0.00142225	up	NW_018743955.1	1050954	1051722	-	LOC110689147	--	--	uncharacterized protein LOC110689147 [Chenopodium quinoa]	--	SubName: Full=Uncharacterized protein {ECO:0000313|EMBL:KNA07551.1};	--	GO:0016021,integral component of membrane	--
gene-LOC110689149	3.17	2.07	2.74	3.31	4.97	4.62	243	166	218	258	437	348	2.113	1.079	0.00153904	0.0107127	up	NW_018743955.1	1113508	1140049	+	LOC110689149	--	K01115 phospholipase D1/2 [EC:3.1.4.4] | (RefSeq) phospholipase D zeta 1-like (A)	phospholipase D zeta 1-like [Chenopodium quinoa]	RecName: Full=Phospholipase D zeta 1 {ECO:0000303|PubMed:11891260}; Short=PLDzeta1 {ECO:0000303|PubMed:11891260}; EC=3.1.4.4 {ECO:0000269|PubMed:11891260}; AltName: Full=Phospholipase D p1; Short=AtPLDp1; AltName: Full=Phospholipase D1 PHOX and PX-containing domain protein;	RecName: Full=Phospholipase {ECO:0000256|PIRNR:PIRNR009376}; EC=3.1.4.4 {ECO:0000256|PIRNR:PIRNR009376};	Phospholipase D1	GO:0031410,cytoplasmic vesicle; GO:0070290,N-acylphosphatidylethanolamine-specific phospholipase D activity; GO:0035091,phosphatidylinositol binding; GO:0004630,phospholipase D activity; GO:0048017,inositol lipid-mediated signaling; GO:0008610,lipid biosynthetic process; GO:0016042,lipid catabolic process; GO:0006654,phosphatidic acid biosynthetic process; GO:0048364,root development	Phospholipase D Active site motif
gene-LOC110689184	0.09	0.09	0.02	2.94	3.8	4.98	4	4	1	129	188	211	76.69	6.261	1.17483e-23	4.06102e-21	up	NW_018743955.1	2891548	2894002	+	LOC110689184	--	--	--	--	--	--	--	--
gene-LOC110689189	0	0	0	0	0.41	2.38	0	0	0	0	6	30	91.004	6.508	0.00457523	0.0244518	up	NW_018742329.1	6683807	6684765	+	LOC110689189	--	K12951 cobalt/nickel-transporting P-type ATPase D [EC:3.6.3.-] | (RefSeq) hypothetical protein (A)	pollen allergen Che a 1 [Chenopodium quinoa]	RecName: Full=Pollen allergen Che a 1; AltName: Allergen=Che a 1; Flags: Precursor;	SubName: Full=Pollen allergen Cro s 1 {ECO:0000313|EMBL:AAX93750.1};	--	GO:0005615,extracellular space	Pollen proteins Ole e I like
gene-LOC110689194	2.6	2.22	3.75	4.94	5.42	8.8	46	41	69	89	110	153	2.906	1.539	0.000374722	0.00344865	up	NW_018743955.1	3398439	3399387	+	LOC110689194	--	K01870 isoleucyl-tRNA synthetase [EC:6.1.1.5] | (RefSeq) isoleucine--tRNA ligase, chloroplastic/mitochondrial-like (A)	dirigent protein 23-like [Chenopodium quinoa]	RecName: Full=Dirigent protein 23; Short=AtDIR23; Flags: Precursor;	RecName: Full=Dirigent protein {ECO:0000256|RuleBase:RU363099};	--	GO:0048046,apoplast; GO:0016853,isomerase activity	Dirigent-like protein
gene-LOC110689195	1.4	1.03	2.53	7.27	9.77	8.67	26	20	49	138	209	159	6.708	2.746	9.64638e-10	4.5038e-08	up	NW_018743955.1	3401605	3402605	+	LOC110689195	--	--	--	--	--	--	--	--
gene-LOC110689197	0.1	0.07	0.21	0.28	0.48	0.48	4	3	9	12	23	20	4.373	2.129	0.00626664	0.0311949	up	NW_018743955.1	3428428	3430973	+	LOC110689197	--	K23288 syndetin | (RefSeq) uncharacterized LOC105761952 (A)	uncharacterized protein LOC110689197 [Chenopodium quinoa]	--	SubName: Full=Uncharacterized protein {ECO:0000313|EMBL:KNA09127.1}; Flags: Fragment;	FOG: Transposon-encoded proteins with TYA, reverse transcriptase, integrase domains in various combinations	GO:0003676,nucleic acid binding; GO:0008270,zinc ion binding	--
gene-LOC110689220	23.75	20.09	26.75	27.95	33.64	47.98	431	381	505	517	701	857	2.031	1.022	0.00182461	0.0122305	up	NW_018743955.1	4750544	4758557	-	LOC110689220	--	K03671 thioredoxin 1 | (RefSeq) Thioredoxin H-type (A)	thioredoxin-like 3-1, chloroplastic [Chenopodium quinoa]	RecName: Full=Thioredoxin-like 3-1, chloroplastic; AltName: Full=Thioredoxin WCRKC-1; Flags: Precursor;	SubName: Full=Uncharacterized protein {ECO:0000313|EMBL:KNA22536.1};	Thioredoxin	GO:0009570,chloroplast stroma; GO:0016671,oxidoreductase activity, acting on a sulfur group of donors, disulfide as acceptor; GO:0015035,protein disulfide oxidoreductase activity; GO:0047134,protein-disulfide reductase activity; GO:0004791,thioredoxin-disulfide reductase activity; GO:0045454,cell redox homeostasis; GO:0034599,cellular response to oxidative stress; GO:0006662,glycerol ether metabo…	Thioredoxin
gene-LOC110689264	2.88	2.47	2.28	5.49	4.72	5.12	68	61	56	132	128	119	2.608	1.383	1.82293e-07	5.26317e-06	up	NW_018743955.1	6256279	6261408	-	LOC110689264	--	K05955 protein farnesyltransferase/geranylgeranyltransferase type-1 subunit alpha [EC:2.5.1.58 2.5.1.59] | (RefSeq) protein farnesyltransferase/geranylgeranyltransferase type-1 subunit alpha-like (A)	protein farnesyltransferase/geranylgeranyltransferase type-1 subunit alpha-like [Chenopodium quinoa]	RecName: Full=Protein farnesyltransferase/geranylgeranyltransferase type-1 subunit alpha; EC=2.5.1.58; EC=2.5.1.59; AltName: Full=CAAX farnesyltransferase subunit alpha; AltName: Full=FTase-alpha; AltName: Full=Ras proteins prenyltransferase subunit alpha; AltName: Full=Type I protein geranyl-geranyltransferase subunit alpha; Short=GGTase-I-alpha;	SubName: Full=Uncharacterized protein {ECO:0000313|EMBL:KNA16504.1};	Protein farnesyltransferase, alpha subunit/protein geranylgeranyltransferase type I, alpha subunit	GO:0005953,CAAX-protein geranylgeranyltransferase complex; GO:0005965,protein farnesyltransferase complex; GO:0004662,CAAX-protein geranylgeranyltransferase activity; GO:0004660,protein farnesyltransferase activity; GO:0004661,protein geranylgeranyltransferase activity; GO:0018343,protein farnesylation; GO:0018344,protein geranylgeranylation	Protein prenyltransferase alpha subunit repeat
gene-LOC110689266	0.02	0.01	0.01	0.15	0.34	0.43	3	1	1	21	54	58	34.645	5.115	2.45655e-08	8.58722e-07	up	NW_018743955.1	6331899	6350851	+	LOC110689266	--	K14400 pre-mRNA cleavage complex 2 protein Pcf11 | (RefSeq) LOW QUALITY PROTEIN: uncharacterized protein LOC111982967 (A)	protein MAIN-LIKE 1-like [Chenopodium quinoa]	RecName: Full=Protein MAIN-LIKE 1 {ECO:0000303|PubMed:24635680};	SubName: Full=Uncharacterized protein {ECO:0000313|EMBL:OMO67845.1};	--	GO:0005634,nucleus; GO:0008483,transaminase activity; GO:0016458,gene silencing; GO:0010073,meristem maintenance; GO:0010082,regulation of root meristem growth	Plant mobile domain
gene-LOC110689301	0.24	0.28	0.13	0.54	0.53	1.3	12	15	7	28	31	65	4.867	2.283	0.000274882	0.00270559	up	NW_018743955.1	6731832	6735250	+	LOC110689301	--	K08139 MFS transporter, SP family, sugar:H+ symporter | (RefSeq) sugar transport protein 1 (A)	hexose carrier protein HEX6-like [Chenopodium quinoa]	RecName: Full=Hexose carrier protein HEX6;	SubName: Full=Major facilitator superfamily protein {ECO:0000313|EMBL:EOY22822.1};	Predicted transporter (major facilitator superfamily)	GO:0016021,integral component of membrane; GO:0015293,symporter activity; GO:0008643,carbohydrate transport	Sugar (and other) transporter
gene-LOC110689325	3.72	3.91	4.13	9.83	12.47	16.67	91	100	105	245	350	401	4.366	2.126	5.54954e-11	3.32955e-09	up	NW_018743955.1	6960885	6962197	+	LOC110689325	--	K20604 mitogen-activated protein kinase kinase 9 [EC:2.7.12.2] | (RefSeq) mitogen-activated protein kinase kinase 9-like (A)	mitogen-activated protein kinase kinase 9-like [Chenopodium quinoa]	RecName: Full=Mitogen-activated protein kinase kinase 9; Short=AtMKK9; Short=MAP kinase kinase 9; EC=2.7.12.2;	SubName: Full=Uncharacterized protein {ECO:0000313|EMBL:KNA17854.1};	Mitogen-activated protein kinase kinase (MAP2K)	GO:0005737,cytoplasm; GO:0005634,nucleus; GO:0005524,ATP binding; GO:0004708,MAP kinase kinase activity; GO:0030295,protein kinase activator activity; GO:0004674,protein serine/threonine kinase activity; GO:0010120,camalexin biosynthetic process; GO:0009693,ethylene biosynthetic process; GO:0009873,ethylene-activated signaling pathway; GO:0010150,leaf senescence; GO:0045893,positive regulation of…	Protein kinase domain
gene-LOC110689342	0.04	0	0	0.08	0.64	1.21	1	0	0	2	19	31	65.248	6.028	0.000321466	0.00306483	up	NW_018743955.1	7187243	7188925	+	LOC110689342	--	--	--	--	--	--	--	--
gene-LOC110689352	1.79	1.78	1.27	7.08	2.7	1.81	23	24	17	93	40	23	3.008	1.589	0.00533065	0.0275174	up	NW_018743955.1	7260818	7263271	+	LOC110689352	--	--	--	--	--	--	--	--
gene-LOC110689366	0.5	0.85	0.5	1.19	1	0.73	38	68	40	93	88	55	2.069	1.049	0.00274668	0.0166431	up	NW_018743955.1	7411522	7417008	+	LOC110689366	--	K15078 structure-specific endonuclease subunit SLX1 [EC:3.6.1.-] | (RefSeq) putative disease resistance protein RGA1 (A)	putative disease resistance protein RGA3 [Chenopodium quinoa]	RecName: Full=Putative disease resistance protein RGA3; AltName: Full=Blight resistance protein B149; AltName: Full=RGA1-blb;	SubName: Full=NBS-LRR type resistance protein {ECO:0000313|EMBL:ABJ99599.1};	Apoptotic ATPase	GO:0043531,ADP binding; GO:0005524,ATP binding; GO:0006952,defense response	NB-ARC domain
gene-LOC110689388	0.84	0.81	1.4	1.68	1.45	3.51	32	32	55	65	63	131	2.831	1.501	0.00386059	0.0214719	up	NW_018743955.1	7641727	7647334	-	LOC110689388	--	K14638 solute carrier family 15 (peptide/histidine transporter), member 3/4 | (RefSeq) protein NRT1/ PTR FAMILY 5.2-like (A)	protein NRT1/ PTR FAMILY 5.2-like [Chenopodium quinoa]	RecName: Full=Protein NRT1/ PTR FAMILY 5.2; Short=AtNPF5.2; AltName: Full=Peptide transporter PTR3-A; Short=AtPTR3;	SubName: Full=Uncharacterized protein {ECO:0000313|EMBL:KNA23392.1};	H+/oligopeptide symporter	GO:0016021,integral component of membrane; GO:0042936,NA; GO:0022857,transmembrane transporter activity; GO:0042937,tripeptide transmembrane transporter activity; GO:0042742,defense response to bacterium; GO:0042938,dipeptide transport; GO:0042538,hyperosmotic salinity response; GO:0009737,response to abscisic acid; GO:0080052,response to histidine; GO:0009753,response to jasmonic acid; GO:004320…	POT family
gene-LOC110689405	43.65	30.33	42.61	53.58	69.44	74.91	975	708	990	1220	1781	1647	2.213	1.146	0.000172151	0.00184427	up	NW_018743955.1	7867607	7871237	+	LOC110689405	--	K17637 exocyst complex component 2 | (RefSeq) exocyst complex component SEC5A-like (A)	plastid-lipid-associated protein 6, chloroplastic-like [Chenopodium quinoa]	RecName: Full=Plastid-lipid-associated protein 6, chloroplastic {ECO:0000303|PubMed:16850419}; AltName: Full=Fibrillin-4 {ECO:0000303|PubMed:16461379}; AltName: Full=Fibrillin-6 {ECO:0000303|PubMed:18455927}; AltName: Full=Harpin-binding protein 1 {ECO:0000303|Ref.1}; Short=HrBP1 {ECO:0000303|Ref.1}; AltName: Full=Plastoglobulin 30.4 {ECO:0000303|PubMed:16414959}; Short=AtPGL30.4 {ECO:0000303|Pub…	SubName: Full=Uncharacterized protein {ECO:0000313|EMBL:KNA24114.1};	--	GO:0009507,chloroplast; GO:0009941,chloroplast envelope; GO:0009534,chloroplast thylakoid; GO:0009535,chloroplast thylakoid membrane; GO:0016020,membrane; GO:0005634,nucleus; GO:0005886,plasma membrane; GO:0010287,plastoglobule; GO:0009579,thylakoid; GO:0031977,thylakoid lumen; GO:0009658,chloroplast organization; GO:0042742,defense response to bacterium; GO:0010193,response to ozone	PAP_fibrillin
gene-LOC110689437	20.1	9.63	38.03	35.11	48.05	64.22	833	417	1639	1483	2286	2619	2.787	1.479	0.0048481	0.0255979	up	NW_018743955.1	8256564	8261016	-	LOC110689437	--	K08176 MFS transporter, PHS family, inorganic phosphate transporter | (RefSeq) probable inorganic phosphate transporter 1-4 (A)	probable inorganic phosphate transporter 1-4 [Chenopodium quinoa]	RecName: Full=Probable inorganic phosphate transporter 1-4; Short=OsPT4; Short=OsPht1;4; AltName: Full=H(+)/Pi cotransporter; AltName: Full=OsPT1;	SubName: Full=Uncharacterized protein {ECO:0000313|EMBL:KNA12764.1};	Inorganic phosphate transporter	GO:0005887,integral component of plasma membrane; GO:0005315,inorganic phosphate transmembrane transporter activity; GO:0015293,symporter activity; GO:0006817,phosphate ion transport	Sugar (and other) transporter
gene-LOC110689442	0	0	0	0.15	0.23	0.31	0	0	0	4	7	8	44.861	5.487	0.00185858	0.012403	up	NW_018743955.1	2891554	2895576	-	LOC110689442	--	--	--	--	--	--	--	--
gene-LOC110689511	0	0.02	0	0.03	0.42	0.9	0	1	0	2	29	54	107.415	6.747	5.42882e-05	0.00071545	up	NW_018743955.1	7195829	7202074	+	LOC110689511	--	K13420 LRR receptor-like serine/threonine-protein kinase FLS2 [EC:2.7.11.1] | (RefSeq) hypothetical protein (A)	receptor-like protein 12 [Chenopodium quinoa]	RecName: Full=Receptor like protein 7 {ECO:0000303|PubMed:18434605}; Short=AtRLP7 {ECO:0000303|PubMed:18434605}; Flags: Precursor;	SubName: Full=Uncharacterized protein {ECO:0000313|EMBL:KZM95439.1};	FOG: Leucine rich repeat	GO:0016021,integral component of membrane	Leucine rich repeat
gene-LOC110689533	0.19	0.08	0.03	0.73	0.81	0.44	16	7	3	63	79	37	8.583	3.102	1.53535e-06	3.42302e-05	up	NW_018743955.1	8117741	8124427	-	LOC110689533	--	K10615 E3 ubiquitin-protein ligase HERC4 [EC:2.3.2.26] | (RefSeq) probable E3 ubiquitin-protein ligase HERC4 isoform X1 (A)	uncharacterized protein LOC110689533 [Chenopodium quinoa]	RecName: Full=PH, RCC1 and FYVE domains-containing protein 1 {ECO:0000303|PubMed:11563980}; AltName: Full=Protein Praf4 {ECO:0000303|PubMed:15358268};	SubName: Full=Uncharacterized protein {ECO:0000313|EMBL:KNA21076.1};	--	GO:0046872,metal ion binding; GO:0070300,phosphatidic acid binding; GO:0035091,phosphatidylinositol binding; GO:0017112,Rab guanyl-nucleotide exchange factor activity	Regulator of chromosome condensation (RCC1) repeat
gene-LOC110689542	0	0	0	0.07	0	0.66	0	0	0	3	0	26	73.42	6.198	0.0105215	0.0462576	up	NW_018743955.1	140707	142871	-	LOC110689542	--	K01759 lactoylglutathione lyase [EC:4.4.1.5] | (RefSeq) probable lactoylglutathione lyase, chloroplastic (A)	uncharacterized protein LOC110689542 [Chenopodium quinoa]	RecName: Full=Protein SRC2 {ECO:0000305}; AltName: Full=Protein SOYBEAN GENE REGULATED BY COLD 2 {ECO:0000303|Ref.1};	SubName: Full=Uncharacterized protein {ECO:0000313|EMBL:KNA25774.1};	--	GO:0005789,endoplasmic reticulum membrane; GO:0016021,integral component of membrane; GO:0005886,plasma membrane; GO:0032586,protein storage vacuole membrane	C2 domain
gene-LOC110689562	0	0	0	3.48	0.14	0.34	0	0	0	43	2	4	105.948	6.727	0.000401861	0.00365213	up	NW_018743955.1	6629192	6630742	+	LOC110689562	--	--	--	--	--	--	--	--
gene-LOC110689616	5.79	5.6	8.94	12.06	11.86	18.34	249	252	400	529	586	777	2.697	1.431	3.88788e-05	0.000543755	up	NW_018743975.1	174716	177027	-	LOC110689616	--	K00786 beta-1,6-galactosyltransferase [EC:2.4.1.-] | (RefSeq) beta-1,6-galactosyltransferase GALT29A-like (A)	beta-1,6-galactosyltransferase GALT29A-like [Chenopodium quinoa]	RecName: Full=Beta-1,6-galactosyltransferase GALT29A {ECO:0000305}; EC=2.4.1.- {ECO:0000305}; AltName: Full=GT29 family galactosyltransferase 1 {ECO:0000305}; Short=AtGALT29A {ECO:0000303|PubMed:24693939}; AltName: Full=Sialyltransferase-like protein GT29A {ECO:0000305};	SubName: Full=Uncharacterized protein {ECO:0000313|EMBL:KNA12641.1};	Sialyltransferase	GO:0000139,Golgi membrane; GO:0016021,integral component of membrane; GO:0008378,galactosyltransferase activity; GO:0008373,sialyltransferase activity; GO:0009311,oligosaccharide metabolic process; GO:0018279,protein N-linked glycosylation via asparagine; GO:0097503,sialylation	Glycosyltransferase family 29 (sialyltransferase)
gene-LOC110689626	15.43	14.53	11.76	19.61	41.67	33.14	623	613	494	807	1932	1317	3.027	1.598	8.02056e-06	0.000142883	up	NW_018743975.1	295660	297828	+	LOC110689626	--	--	--	--	--	--	--	--
gene-LOC110689653	0.02	0.04	0.05	4.61	3.15	2.17	1	2	2	200	154	91	111.681	6.803	9.11653e-20	2.13349e-17	up	NW_018743977.1	142523	146339	-	LOC110689653	--	--	--	--	--	--	--	--
gene-LOC110689655	0.04	0.16	0.08	0.73	0.64	0.5	1	4	2	18	18	12	8.819	3.141	0.000259139	0.00257849	up	NW_018743977.1	375245	378012	+	LOC110689655	--	--	uncharacterized protein LOC110689655 [Chenopodium quinoa]	--	--	--	--	--
gene-LOC110689662	636.46	586.77	802.78	863.05	1120.2	1237.55	8293	7991	10881	11463	16760	15871	2.077	1.055	0.000266294	0.00263552	up	NW_018743977.1	519618	521132	+	LOC110689662	--	K02693 photosystem I subunit IV | (RefSeq) photosystem I reaction center subunit IV, chloroplastic-like (A)	photosystem I reaction center subunit IV, chloroplastic-like [Chenopodium quinoa]	RecName: Full=Photosystem I reaction center subunit IV, chloroplastic; Short=PSI-E; Flags: Precursor;	SubName: Full=Uncharacterized protein {ECO:0000313|EMBL:KNA18985.1};	--	GO:0009535,chloroplast thylakoid membrane; GO:0009538,photosystem I reaction center; GO:0051219,phosphoprotein binding; GO:0015979,photosynthesis	Photosystem I reaction centre subunit IV / PsaE
gene-LOC110689689	3.83	3.89	3.93	4.29	7.68	6.22	243	258	259	277	559	388	2.068	1.049	0.00124906	0.00908534	up	NW_018743977.1	1043958	1063597	+	LOC110689689	--	K20160 DENN domain-containing protein 1 | (RefSeq) DENN domain (A)	uncharacterized protein LOC110689689 isoform X1 [Chenopodium quinoa]	RecName: Full=DENN domain and WD repeat-containing protein SCD1 {ECO:0000305}; AltName: Full=Protein STOMATAL CYTOKINESIS DEFECTIVE 1 {ECO:0000303|PubMed:12874123};	SubName: Full=Uncharacterized protein {ECO:0000313|EMBL:KNA05765.1};	--	GO:0030136,clathrin-coated vesicle; GO:0080008,Cul4-RING E3 ubiquitin ligase complex; GO:0005886,plasma membrane; GO:0000911,cytokinesis by cell plate formation; GO:0010235,guard mother cell cytokinesis; GO:0009825,multidimensional cell growth; GO:0045824,negative regulation of innate immune response; GO:0040008,regulation of growth	DENN (AEX-3) domain
gene-LOC110689694	2.33	1.47	2.42	2.85	9.6	11.02	102	67	110	127	482	474	5.025	2.329	2.65707e-05	0.000395236	up	NW_018743977.1	1135635	1139127	+	LOC110689694	--	K13429 chitin elicitor receptor kinase 1 | (RefSeq) lysM domain receptor-like kinase 3 (A)	serine/threonine receptor-like kinase NFP [Chenopodium quinoa]	RecName: Full=Serine/threonine receptor-like kinase NFP {ECO:0000303|PubMed:16723404}; Short=RLK NFP {ECO:0000303|PubMed:16723404}; AltName: Full=Nod factor perception protein {ECO:0000303|PubMed:12753588}; EC=2.7.10.- {ECO:0000255|PROSITE-ProRule:PRU00159}; AltName: Full=Nod-factor receptor 5; Flags: Precursor;	SubName: Full=Uncharacterized protein {ECO:0000313|EMBL:KNA21988.1};	--	GO:0016021,integral component of membrane; GO:0005886,plasma membrane; GO:0005775,vacuolar lumen; GO:0005524,ATP binding; GO:0004713,protein tyrosine kinase activity; GO:0006952,defense response; GO:0009877,nodulation; GO:1902290,positive regulation of defense response to oomycetes; GO:0006486,protein glycosylation; GO:1900150,regulation of defense response to fungus; GO:0002237,response to molec…	Protein kinase domain
gene-LOC110689730	10.86	12.87	15.11	12.99	23.68	38.74	264	327	382	322	661	927	2.588	1.372	0.00203058	0.0132436	up	NW_018743977.1	1757923	1762734	+	LOC110689730	--	K15631 molybdenum cofactor sulfurtransferase [EC:2.8.1.9] | (RefSeq) molybdenum cofactor sulfurase (A)	mitochondrial amidoxime-reducing component 1-like [Chenopodium quinoa]	RecName: Full=Molybdenum cofactor sulfurase {ECO:0000255|HAMAP-Rule:MF_03050}; Short=MCS {ECO:0000255|HAMAP-Rule:MF_03050}; Short=MOS {ECO:0000255|HAMAP-Rule:MF_03050}; Short=MoCo sulfurase {ECO:0000255|HAMAP-Rule:MF_03050}; EC=2.8.1.9 {ECO:0000255|HAMAP-Rule:MF_03050}; AltName: Full=Molybdenum cofactor sulfurase-like protein 3 {ECO:0000255|HAMAP-Rule:MF_03050}; AltName: Full=Molybdenum cofactor …	SubName: Full=Uncharacterized protein {ECO:0000313|EMBL:KNA08213.1};	Uncharacterized Fe-S protein	GO:0008265,Mo-molybdopterin cofactor sulfurase activity; GO:0102867,molybdenum cofactor sulfurtransferase activity; GO:0030151,molybdenum ion binding; GO:0030170,pyridoxal phosphate binding; GO:0006777,Mo-molybdopterin cofactor biosynthetic process	MOSC N-terminal beta barrel domain
gene-LOC110689741	0.08	0.07	0.09	0.32	0.14	0.23	8	7	9	31	15	21	3.521	1.816	0.00327012	0.0190141	up	NW_018742329.1	152054	171955	+	LOC110689741	--	K01000 phospho-N-acetylmuramoyl-pentapeptide-transferase [EC:2.7.8.13] | (RefSeq) phospho-N-acetylmuramoyl-pentapeptide- transferase homolog isoform X1 (A)	phospho-N-acetylmuramoyl-pentapeptide-transferase homolog isoform X1 [Chenopodium quinoa]	RecName: Full=Phospho-N-acetylmuramoyl-pentapeptide-transferase homolog; AltName: Full=Translocase I;	SubName: Full=Uncharacterized protein {ECO:0000313|EMBL:KMS96542.1};	--	GO:0016021,integral component of membrane; GO:0008963,phospho-N-acetylmuramoyl-pentapeptide-transferase activity	Glycosyl transferase family 4
gene-LOC110689750	1.73	0.68	0.91	3.66	3.08	3.05	97	40	53	209	198	168	3.768	1.914	3.06523e-06	6.21819e-05	up	NW_018743977.1	2057128	2068053	-	LOC110689750	--	K05941 glutathione gamma-glutamylcysteinyltransferase [EC:2.3.2.15] | (RefSeq) glutathione gamma-glutamylcysteinyltransferase 3-like isoform X1 (A)	glutathione gamma-glutamylcysteinyltransferase 3-like isoform X1 [Chenopodium quinoa]	RecName: Full=Glutathione gamma-glutamylcysteinyltransferase 1; EC=2.3.2.15; AltName: Full=LjPCS1-8R; AltName: Full=Phytochelatin synthase 1;	SubName: Full=Uncharacterized protein {ECO:0000313|EMBL:KNA23608.1};	Phytochelatin synthase	GO:0016756,glutathione gamma-glutamylcysteinyltransferase activity; GO:0046872,metal ion binding; GO:0046938,phytochelatin biosynthetic process; GO:0010038,response to metal ion	Phytochelatin synthase
gene-LOC110689758	0	0	0	0	0.91	0.42	0	0	0	0	20	8	65.957	6.043	0.00899826	0.0411902	up	NW_018743977.1	2271502	2272626	+	LOC110689758	--	--	uncharacterized protein LOC110689758 [Chenopodium quinoa]	--	SubName: Full=Uncharacterized protein {ECO:0000313|EMBL:KNA08123.1};	--	GO:0003676,nucleic acid binding; GO:0008270,zinc ion binding	Zinc knuckle
gene-LOC110689788	0	0	0	2.16	4.19	3.47	0	0	0	98	214	152	1084.41	10.083	1.75621e-15	2.16243e-13	up	NW_018742329.1	501670	505548	-	LOC110689788	--	--	uncharacterized protein LOC110689788 [Chenopodium quinoa]	--	SubName: Full=Uncharacterized protein {ECO:0000313|EMBL:KNA09889.1};	--	GO:0005524,ATP binding	--
gene-LOC110689795	0.03	0.13	0	0.1	0.24	2.21	1	4	0	3	8	63	21.72	4.441	0.00202001	0.0131952	up	NW_018743977.1	3020080	3024993	-	LOC110689795	--	--	--	--	--	--	--	--
gene-LOC110689817	0	0	0	15.13	22.51	11.29	0	0	0	981	1644	707	7625.07	12.897	1.67786e-25	6.94708e-23	up	NW_018743977.1	3601682	3607071	-	LOC110689817	--	K15255 ATP-dependent DNA helicase PIF1 [EC:3.6.4.12] | (RefSeq) uncharacterized protein LOC107022360 (A)	uncharacterized protein LOC110689817 isoform X1 [Chenopodium quinoa]	--	SubName: Full=uncharacterized protein LOC108984871 {ECO:0000313|RefSeq:XP_018812501.1};	DNA helicase PIF1/RRM3	--	Helitron helicase-like domain at N-terminus
gene-LOC110689825	315.87	216.55	280.57	315.18	475.33	473.62	4498	3223	4156	4575	7772	6638	2.037	1.027	0.00125175	0.00909614	up	NW_018743977.1	3901664	3902562	-	LOC110689825	--	--	late embryogenesis abundant protein Lea5-like [Chenopodium quinoa]	RecName: Full=Late embryogenesis abundant protein Lea5;	SubName: Full=Uncharacterized protein {ECO:0000313|EMBL:KNA14821.1};	--	GO:0006950,response to stress	Late embryogenesis abundant protein
gene-LOC110689845	0	0	0	0.21	0.5	0.85	0	0	0	8	21	31	144.228	7.172	2.2914e-06	4.84757e-05	up	NW_018743977.1	552767	555196	+	LOC110689845	--	K19984 exocyst complex component 5 | (RefSeq) uncharacterized protein LOC113272286 (A)	zinc finger BED domain-containing protein RICESLEEPER 2-like [Chenopodium quinoa]	RecName: Full=Zinc finger BED domain-containing protein RICESLEEPER 2; AltName: Full=Transposase-like protein RICESLEEPER 2;	SubName: Full=Uncharacterized protein {ECO:0000313|EMBL:KNA20152.1};	Tam3-transposase (Ac family)	GO:0005634,nucleus; GO:0003700,DNA-binding transcription factor activity; GO:0046872,metal ion binding; GO:0046983,protein dimerization activity; GO:0000977,RNA polymerase II regulatory region sequence-specific DNA binding; GO:0009791,post-embryonic development; GO:0006357,regulation of transcription by RNA polymerase II; GO:0006351,transcription, DNA-templated	Domain of unknown function (DUF4413)
gene-LOC110689847	0.63	0.14	1.25	1.23	3.44	3.03	13	3	27	26	82	62	4.944	2.306	0.00452408	0.0242783	up	NW_018743977.1	814589	821896	-	LOC110689847	--	K00799 glutathione S-transferase [EC:2.5.1.18] | (RefSeq) uncharacterized protein LOC110786294 (A)	uncharacterized protein LOC110689847 [Chenopodium quinoa]	--	SubName: Full=Uncharacterized protein {ECO:0000313|EMBL:KNA18319.1}; Flags: Fragment;	FOG: Reverse transcriptase	GO:0003676,nucleic acid binding	Reverse transcriptase-like
gene-LOC110689873	0	0	0	0.23	1.63	1.83	0	0	0	7	57	55	285.827	8.159	1.1164e-07	3.36779e-06	up	NW_018742329.1	1151143	1157179	+	LOC110689873	--	K05658 ATP-binding cassette, subfamily B (MDR/TAP), member 1 [EC:7.6.2.2] | (RefSeq) uncharacterized protein LOC111781709 (A)	protein SRG1-like [Chenopodium quinoa]	RecName: Full=Protein SRG1; Short=AtSRG1; AltName: Full=Protein SENESCENCE-RELATED GENE 1;	SubName: Full=Uncharacterized protein {ECO:0000313|EMBL:KMS96663.1};	Iron/ascorbate family oxidoreductases	GO:0046872,metal ion binding; GO:0016682,oxidoreductase activity, acting on diphenols and related substances as donors, oxygen as acceptor; GO:0010150,leaf senescence	2OG-Fe(II) oxygenase superfamily
gene-LOC110689890	0.59	1.08	0.42	1.14	1.22	1.15	22	42	16	43	52	42	2.238	1.162	0.0107936	0.0471133	up	NW_018742329.1	1321799	1325212	-	LOC110689890	--	--	--	--	--	--	--	--
gene-LOC110689918	0	0	0	0.08	0.2	0.67	0	0	0	3	8	23	83.607	6.386	0.000301909	0.00291899	up	NW_018743977.1	799222	802096	-	LOC110689918	--	--	uncharacterized protein LOC110689918 [Chenopodium quinoa]	--	--	--	--	--
gene-LOC110689922	0	0.08	0.11	0.37	0.43	0.24	0	3	4	13	17	8	6.904	2.787	0.00638696	0.0315967	up	NW_018743977.1	1079472	1081756	-	LOC110689922	--	K00889 1-phosphatidylinositol-4-phosphate 5-kinase [EC:2.7.1.68] | (RefSeq) phosphatidylinositol 4-phosphate 5-kinase 6-like (A)	uncharacterized protein LOC110689922 [Chenopodium quinoa]	RecName: Full=Ankyrin repeat-containing protein BDA1 {ECO:0000305}; AltName: Full=Protein BIAN DA 1 {ECO:0000303|PubMed:22740615};	SubName: Full=Uncharacterized protein {ECO:0000313|EMBL:KMS95414.1};	FOG: Ankyrin repeat	GO:0016021,integral component of membrane; GO:0005886,plasma membrane; GO:0045087,innate immune response; GO:0009751,response to salicylic acid	Ankyrin repeats (3 copies)
gene-LOC110689941	0	0	0	4.17	0.16	0.19	0	0	0	68	3	3	158.451	7.308	0.000114882	0.00132737	up	NW_018743978.1	10828	11687	+	LOC110689941	--	--	--	--	--	--	--	--
gene-LOC110689943	0	0	0	1.42	1.04	1.66	0	0	0	23	19	26	158.615	7.309	8.98884e-08	2.76475e-06	up	NW_018743978.1	15754	16607	+	LOC110689943	--	--	miraculin-like [Chenopodium quinoa]	RecName: Full=Miraculin; Short=MIR; Flags: Precursor;	SubName: Full=Uncharacterized protein {ECO:0000313|EMBL:KNA03096.1};	--	GO:0004866,endopeptidase inhibitor activity	Trypsin and protease inhibitor
gene-LOC110689944	0	0	0	3.9	0.16	0.19	0	0	0	64	3	3	150.004	7.229	0.000134519	0.001508	up	NW_018743978.1	24590	25454	+	LOC110689944	--	--	--	--	--	--	--	--
gene-LOC110689946	0	0	0	70.17	0.99	48.31	0	0	0	695	11	462	2687.83	11.392	1.60579e-06	3.55481e-05	up	NW_018743978.1	8979	9500	+	LOC110689946	--	--	trypsin inhibitor 2-like [Chenopodium quinoa]	RecName: Full=Trypsin inhibitor 1B; AltName: Full=ETIB;	SubName: Full=Uncharacterized protein {ECO:0000313|EMBL:KNA14861.1};	--	GO:0004867,serine-type endopeptidase inhibitor activity	Trypsin and protease inhibitor
gene-LOC110689958	0	0	0	2.35	2.04	1.81	0	0	0	43	42	32	268.859	8.071	3.46969e-10	1.76902e-08	up	NW_018742329.1	1869560	1872939	-	LOC110689958	--	--	--	--	--	--	--	--
gene-LOC110689984	0	0	0	2.18	2.62	2.08	0	0	0	191	258	176	1443.01	10.495	8.17658e-18	1.4883e-15	up	NW_018743979.1	585650	590715	+	LOC110689984	--	K17086 transmembrane 9 superfamily member 2/4 | (RefSeq) uncharacterized LOC101300290 (A)	uncharacterized protein LOC110689984 isoform X1 [Chenopodium quinoa]	--	SubName: Full=uncharacterized protein LOC107806465 {ECO:0000313|RefSeq:XP_016486104.1};	--	GO:0008270,zinc ion binding	SWIM zinc finger
gene-LOC110690005	0	0	0	0.42	0.37	0.2	0	0	0	58	58	27	324.258	8.341	1.62777e-10	8.83731e-09	up	NW_018743979.1	2029221	2039007	+	LOC110690005	--	K00850 6-phosphofructokinase 1 [EC:2.7.1.11] | (RefSeq) uncharacterized protein LOC110711464 (A)	uncharacterized protein LOC110690005 [Chenopodium quinoa]	--	--	--	--	--
gene-LOC110690036	2.51	4.12	3.72	3.61	7.63	5.88	81	139	125	119	283	187	2.218	1.149	0.00469639	0.0249754	up	NW_018743979.1	3948260	3950950	-	LOC110690036	--	K12589 exosome complex component RRP42 | (RefSeq) Exosome complex component RRP42 (A)	uncharacterized protein LOC110690036 [Chenopodium quinoa]	--	SubName: Full=Uncharacterized protein {ECO:0000313|EMBL:KNA03767.1};	--	GO:0008168,methyltransferase activity	Leucine carboxyl methyltransferase
gene-LOC110690041	22.45	17.17	24.92	32.43	65.2	72.45	1501	1200	1733	2210	5006	4768	3.481	1.799	6.06231e-06	0.000112409	up	NW_018743979.1	4182449	4219617	+	LOC110690041	--	K01006 pyruvate, orthophosphate dikinase [EC:2.7.9.1] | (RefSeq) pyruvate, phosphate dikinase, chloroplastic-like (A)	pyruvate, phosphate dikinase, chloroplastic-like [Chenopodium quinoa]	RecName: Full=Pyruvate, phosphate dikinase, chloroplastic; EC=2.7.9.1 {ECO:0000250|UniProtKB:P11155}; AltName: Full=Pyruvate, orthophosphate dikinase; Flags: Precursor;	RecName: Full=Pyruvate, phosphate dikinase {ECO:0000256|PIRNR:PIRNR000853}; EC=2.7.9.1 {ECO:0000256|PIRNR:PIRNR000853};	--	GO:0009507,chloroplast; GO:0005524,ATP binding; GO:0016301,kinase activity; GO:0046872,metal ion binding; GO:0050242,pyruvate, phosphate dikinase activity; GO:0015979,photosynthesis; GO:0006090,pyruvate metabolic process	PEP-utilising enzyme, TIM barrel domain
gene-LOC110690063	1.66	1.57	1.33	3.85	2.73	3.93	185	183	154	437	349	430	2.986	1.578	7.32046e-12	5.22387e-10	up	NW_018742329.1	2476301	2486099	-	LOC110690063	--	--	uncharacterized protein LOC110690063 isoform X1 [Chenopodium quinoa]	--	SubName: Full=Uncharacterized protein {ECO:0000313|EMBL:KNA02738.1}; Flags: Fragment;	--	--	--
gene-LOC110690069	0.14	0.27	0.09	0.51	0.74	1.01	3	6	2	11	18	21	6.024	2.591	0.00143673	0.0101696	up	NW_018743979.1	1651866	1653005	-	LOC110690069	--	K15255 ATP-dependent DNA helicase PIF1 [EC:3.6.4.12] | (RefSeq) uncharacterized protein LOC110897984 (A)	uncharacterized protein LOC110690069 [Chenopodium quinoa]	--	RecName: Full=ATP-dependent DNA helicase {ECO:0000256|RuleBase:RU363044}; EC=3.6.4.12 {ECO:0000256|RuleBase:RU363044};	DNA helicase PIF1/RRM3	--	PIF1-like helicase
gene-LOC110690107	0.81	0.78	0.78	1.47	2.27	3.47	19	19	19	35	61	80	4.038	2.014	8.81194e-05	0.00106415	up	NW_018743987.1	164275	165532	-	LOC110690107	--	--	uncharacterized protein LOC110690107 [Chenopodium quinoa]	--	SubName: Full=Uncharacterized protein {ECO:0000313|EMBL:KNA21646.1};	--	--	Protein of unknown function (DUF1645)
gene-LOC110690115	11.13	7.46	11.12	18.35	28.81	29.24	401	281	417	674	1192	1037	3.365	1.751	6.05373e-07	1.50556e-05	up	NW_018743987.1	624649	627908	-	LOC110690115	--	K08360 cytochrome b-561 [EC:7.2.1.3] | (RefSeq) probable ascorbate-specific transmembrane electron transporter 1 (A)	probable ascorbate-specific transmembrane electron transporter 1 [Chenopodium quinoa]	RecName: Full=Probable ascorbate-specific transmembrane electron transporter 1; EC=1.-.-.-; AltName: Full=Cytochrome b561-1;	SubName: Full=Uncharacterized protein {ECO:0000313|EMBL:PIA63905.1};	Cytochrome b	GO:0016021,integral component of membrane; GO:0046872,metal ion binding; GO:0016491,oxidoreductase activity; GO:0055114,oxidation-reduction process	Eukaryotic cytochrome b561
gene-LOC110690122	4.28	2.58	3.38	4.95	7.87	13.24	89	56	73	105	188	271	3.361	1.749	0.000263237	0.00261281	up	NW_018742329.1	2738249	2742450	+	LOC110690122	--	K03251 translation initiation factor 3 subunit D | (RefSeq) eukaryotic translation initiation factor 3 subunit D-like (A)	cold-regulated 413 inner membrane protein 2, chloroplastic-like [Chenopodium quinoa]	RecName: Full=Cold-regulated 413 inner membrane protein 2, chloroplastic; Short=AtCOR413-IM2; AltName: Full=Cold-regulated 413 thylakoid membrane 2; Short=AtCOR413-TM2; Flags: Precursor;	SubName: Full=Uncharacterized protein {ECO:0000313|EMBL:KMS95911.1};	--	GO:0009941,chloroplast envelope; GO:0009535,chloroplast thylakoid membrane; GO:0031357,integral component of chloroplast inner membrane; GO:0070417,cellular response to cold; GO:0009631,cold acclimation	Cold acclimation protein WCOR413
gene-LOC110690137	267.63	211.55	294.77	326.71	462.78	578.36	3527	2914	4041	4389	7003	7502	2.317	1.212	0.000265927	0.00263327	up	NW_018743987.1	2076319	2077203	+	LOC110690137	--	--	uncharacterized protein LOC110690137 [Chenopodium quinoa]	RecName: Full=Cytochrome b6-f complex subunit 7; AltName: Full=Cytochrome b6-f complex subunit PetM; AltName: Full=Cytochrome b6-f complex subunit VII; Flags: Fragment;	SubName: Full=Uncharacterized protein {ECO:0000313|EMBL:KNA20733.1};	--	GO:0009535,chloroplast thylakoid membrane; GO:0009512,cytochrome b6f complex; GO:0016021,integral component of membrane; GO:0055114,oxidation-reduction process; GO:0015979,photosynthesis	PetM family of cytochrome b6f complex subunit 7
gene-LOC110690190	0	0	0	0	0.57	0.45	0	0	0	0	21	14	83.701	6.387	0.00391882	0.0217425	up	NW_018743987.1	1823344	1825980	+	LOC110690190	--	--	uncharacterized protein LOC110690190 [Chenopodium quinoa]	--	SubName: Full=Uncharacterized protein {ECO:0000313|EMBL:KNA02738.1}; Flags: Fragment;	--	--	--
gene-LOC110690191	0	0	0	0	0.61	0.35	0	0	0	0	31	15	108.961	6.768	0.00169896	0.0115673	up	NW_018743987.1	1833038	1836484	+	LOC110690191	--	--	uncharacterized protein LOC110690191 [Chenopodium quinoa]	--	SubName: Full=Uncharacterized protein {ECO:0000313|EMBL:KNA05758.1}; Flags: Fragment;	--	--	--
gene-LOC110690203	0.16	0	0	3.52	16.29	12.56	3	0	0	68	354	234	281.313	8.136	4.75011e-14	4.81115e-12	up	NW_018743992.1	10036	15010	-	LOC110690203	--	--	succinate dehydrogenase assembly factor 2, mitochondrial-like [Chenopodium quinoa]	RecName: Full=Succinate dehydrogenase assembly factor 2, mitochondrial {ECO:0000305}; Short=SDH assembly factor 2 {ECO:0000305}; Flags: Precursor;	SubName: Full=Uncharacterized protein {ECO:0000313|EMBL:KNA10602.1};	Uncharacterized conserved protein	GO:0005739,mitochondrion; GO:0006121,mitochondrial electron transport, succinate to ubiquinone; GO:0034553,mitochondrial respiratory chain complex II assembly; GO:0018293,protein-FAD linkage; GO:0006099,tricarboxylic acid cycle	Flavinator of succinate dehydrogenase
gene-LOC110690204	0	0	0	1.32	2.05	0.91	0	0	0	24	42	16	187.399	7.55	5.39231e-08	1.76825e-06	up	NW_018743992.1	40027	42078	-	LOC110690204	--	--	--	--	--	--	--	--
gene-LOC110690250	0	0	0	2.38	2.59	2.13	0	0	0	174	213	150	1238.03	10.274	3.38149e-17	5.42161e-15	up	NW_018742329.1	2970922	2974769	+	LOC110690250	--	K15078 structure-specific endonuclease subunit SLX1 [EC:3.6.1.-] | (RefSeq) putative disease resistance protein RGA3 (A)	putative disease resistance protein RGA3 [Chenopodium quinoa]	RecName: Full=Putative disease resistance protein RGA4; AltName: Full=RGA4-blb;	SubName: Full=CC-NBS-LRR type resistance protein {ECO:0000313|EMBL:AFK13849.1};	Apoptotic ATPase	GO:0043531,ADP binding; GO:0005524,ATP binding; GO:0006952,defense response	NB-ARC domain
gene-LOC110690292	522.06	356.45	549.97	649.21	814.17	883.37	17006	12136	18636	21557	30453	28322	2.134	1.094	0.000372956	0.00343912	up	NW_018744026.1	3296698	3301277	+	LOC110690292	--	K00927 phosphoglycerate kinase [EC:2.7.2.3] | (RefSeq) phosphoglycerate kinase, chloroplastic-like (A)	phosphoglycerate kinase, chloroplastic-like [Chenopodium quinoa]	RecName: Full=Phosphoglycerate kinase, chloroplastic; EC=2.7.2.3; Flags: Precursor; Fragment;	RecName: Full=Phosphoglycerate kinase {ECO:0000256|RuleBase:RU000532}; EC=2.7.2.3 {ECO:0000256|RuleBase:RU000532};	3-phosphoglycerate kinase	GO:0009507,chloroplast; GO:0005524,ATP binding; GO:0004618,phosphoglycerate kinase activity; GO:0006096,glycolytic process; GO:0019253,reductive pentose-phosphate cycle	Phosphoglycerate kinase
gene-LOC110690295	1.5	2.58	1.42	6.91	4.95	3.58	53	95	52	248	200	124	3.648	1.867	2.09275e-08	7.45984e-07	up	NW_018744026.1	3956734	3968732	+	LOC110690295	--	K14778 ATP-dependent RNA helicase DDX49/DBP8 [EC:3.6.4.13] | (RefSeq) DEAD-box ATP-dependent RNA helicase 36-like (A)	DEAD-box ATP-dependent RNA helicase 36-like [Chenopodium quinoa]	RecName: Full=DEAD-box ATP-dependent RNA helicase 36; EC=3.6.4.13;	SubName: Full=Uncharacterized protein {ECO:0000313|EMBL:KNA25385.1};	ATP-dependent RNA helicase	GO:0005737,cytoplasm; GO:0005730,nucleolus; GO:0005634,nucleus; GO:0090406,pollen tube; GO:0005524,ATP binding; GO:0004004,ATP-dependent RNA helicase activity; GO:0003676,nucleic acid binding; GO:0009553,embryo sac development; GO:0009561,megagametogenesis; GO:0009791,post-embryonic development; GO:0010501,RNA secondary structure unwinding; GO:0006364,rRNA processing	DEAD/DEAH box helicase
gene-LOC110690298	6.17	5.63	6.94	9.42	27.08	24.22	153	146	179	238	771	591	4.329	2.114	3.93931e-06	7.718e-05	up	NW_018744026.1	4502955	4506296	+	LOC110690298	--	--	--	--	--	--	--	--
gene-LOC110690305	11.65	12.65	12.79	31.07	21.36	23.21	442	502	505	1202	931	867	2.623	1.391	1.51814e-15	1.89406e-13	up	NW_018744026.1	4746084	4777914	+	LOC110690305	--	K16054 methylthioribulose 1-phosphate dehydratase / enolase-phosphatase E1 [EC:4.2.1.109 3.1.3.77] | (RefSeq) probable bifunctional methylthioribulose-1-phosphate dehydratase/enolase-phosphatase E1 1 (A)	probable bifunctional methylthioribulose-1-phosphate dehydratase/enolase-phosphatase E1 1 [Chenopodium quinoa]	RecName: Full=Probable bifunctional methylthioribulose-1-phosphate dehydratase/enolase-phosphatase E1 1 {ECO:0000255|HAMAP-Rule:MF_03118}; Includes: RecName: Full=Methylthioribulose-1-phosphate dehydratase {ECO:0000255|HAMAP-Rule:MF_03118}; Short=MTRu-1-P dehydratase {ECO:0000255|HAMAP-Rule:MF_03118}; EC=4.2.1.109 {ECO:0000255|HAMAP-Rule:MF_03118}; Includes: RecName: Full=Enolase-phosphatase E1 {…	RecName: Full=Probable bifunctional methylthioribulose-1-phosphate dehydratase/enolase-phosphatase E1 {ECO:0000256|HAMAP-Rule:MF_03118}; Includes: RecName: Full=Enolase-phosphatase E1 {ECO:0000256|HAMAP-Rule:MF_03118}; EC=3.1.3.77 {ECO:0000256|HAMAP-Rule:MF_03118}; AltName: Full=2,3-diketo-5-methylthio-1-phosphopentane phosphatase {ECO:0000256|HAMAP-Rule:MF_03118}; Includes: RecName: Full=Methylt…	Enolase-phosphatase E-1	GO:0005737,cytoplasm; GO:0043874,acireductone synthase activity; GO:0000287,magnesium ion binding; GO:0046570,methylthioribulose 1-phosphate dehydratase activity; GO:0019509,L-methionine salvage from methylthioadenosine	Class II Aldolase and Adducin N-terminal domain
gene-LOC110690310	19.02	17.43	27.26	36.76	42.27	46.97	330	316	492	650	842	802	2.566	1.36	9.35873e-06	0.000162422	up	NW_018742329.1	3014806	3016416	-	LOC110690310	--	K01255 leucyl aminopeptidase [EC:3.4.11.1] | (RefSeq) leucyl aminopeptidase (A)	cyclin-U1-1-like [Chenopodium quinoa]	RecName: Full=Cyclin-U1-1; Short=CycU1;1; AltName: Full=Cyclin-P2.1; Short=CycP2;1;	SubName: Full=Uncharacterized protein {ECO:0000313|EMBL:KMS95843.1};	Cyclin	GO:0019901,protein kinase binding; GO:0007049,cell cycle; GO:0051301,cell division; GO:0000079,regulation of cyclin-dependent protein serine/threonine kinase activity	Cyclin
gene-LOC110690386	5.24	3.6	5.27	8.09	9.8	7.7	110	79	115	173	236	159	2.349	1.232	0.000142787	0.00158094	up	NW_018744041.1	135181	136307	+	LOC110690386	--	--	kunitz trypsin inhibitor 2-like [Chenopodium quinoa]	RecName: Full=Kunitz trypsin inhibitor 2 {ECO:0000305}; Short=AtKTI2 {ECO:0000305}; Flags: Precursor;	SubName: Full=Uncharacterized protein {ECO:0000313|EMBL:KNA14862.1};	--	GO:0048046,apoplast; GO:0005618,cell wall; GO:0004866,endopeptidase inhibitor activity	Trypsin and protease inhibitor
gene-LOC110690390	109	58.43	113.03	349.15	254.3	323.08	1958	1097	2112	6393	5245	5712	4.192	2.068	4.59848e-10	2.29182e-08	up	NW_018744041.1	278696	279660	+	LOC110690390	--	--	miraculin-like [Chenopodium quinoa]	RecName: Full=Miraculin; Short=MIR; Flags: Precursor;	SubName: Full=Uncharacterized protein {ECO:0000313|EMBL:KNA03096.1};	--	GO:0004866,endopeptidase inhibitor activity	Trypsin and protease inhibitor
gene-LOC110690392	0	0	0.15	0.47	0.78	2.09	0	0	3	9	17	39	28.384	4.827	0.000252986	0.00253376	up	NW_018744041.1	294170	295188	+	LOC110690392	--	--	miraculin-like [Chenopodium quinoa]	RecName: Full=Miraculin; Short=MIR; Flags: Precursor;	SubName: Full=Uncharacterized protein {ECO:0000313|EMBL:KNA03096.1};	--	GO:0004866,endopeptidase inhibitor activity	Trypsin and protease inhibitor
gene-LOC110690396	3842.06	3290.75	5990.49	6134.38	7416.93	7447.81	73591	65879	119358	119771	163124	140407	2.069	1.049	0.0013922	0.00991409	up	NW_018742329.1	3350082	3351110	-	LOC110690396	--	K08912 light-harvesting complex II chlorophyll a/b binding protein 1 | (RefSeq) chlorophyll a-b binding protein of LHCII type 1-like (A)	chlorophyll a-b binding protein of LHCII type 1-like [Chenopodium quinoa]	RecName: Full=Chlorophyll a-b binding protein, chloroplastic; AltName: Full=LHCII type I CAB; Short=LHCP; Flags: Precursor;	RecName: Full=Chlorophyll a-b binding protein, chloroplastic {ECO:0000256|RuleBase:RU363080};	--	GO:0009535,chloroplast thylakoid membrane; GO:0016021,integral component of membrane; GO:0009522,photosystem I; GO:0009523,photosystem II; GO:0016168,chlorophyll binding; GO:0046872,metal ion binding; GO:0009765,photosynthesis, light harvesting; GO:0018298,protein-chromophore linkage	Chlorophyll A-B binding protein
gene-LOC110690423	4.12	0.58	4.78	5.06	33.06	34.99	68	10	82	85	626	568	10.108	3.337	6.38739e-05	0.000818123	up	NW_018742329.1	3371212	3382953	-	LOC110690423	--	--	uncharacterized protein LOC110690423 [Chenopodium quinoa]	--	SubName: Full=Uncharacterized protein {ECO:0000313|EMBL:KMS95839.1};	--	GO:0005777,peroxisome	--
gene-LOC110690425	0	0	0	7.07	4.96	7.47	0	0	0	205	162	209	1339.74	10.388	1.94603e-17	3.37892e-15	up	NW_018744041.1	1035904	1037639	+	LOC110690425	--	--	uncharacterized protein LOC110690425 isoform X1 [Chenopodium quinoa]	--	SubName: Full=Fgenesh protein 21 {ECO:0000313|EMBL:ABD83280.1};	--	--	Ciliary protein causing Leber congenital amaurosis disease
gene-LOC110690428	0	0	0	0.17	0.25	0.52	0	0	0	9	15	27	122.404	6.936	4.83858e-06	9.24015e-05	up	NW_018744041.1	1042070	1045027	+	LOC110690428	--	K10405 kinesin family member C1 | (RefSeq) kinesin-like protein KIN-14N isoform X1 (A)	probable serine/threonine-protein kinase PBL3 [Chenopodium quinoa]	RecName: Full=Probable serine/threonine-protein kinase PBL3 {ECO:0000305}; EC=2.7.11.1 {ECO:0000305}; AltName: Full=PBS1-like protein 3 {ECO:0000303|PubMed:20413097}; AltName: Full=Protein kinase 2B {ECO:0000305};	SubName: Full=Uncharacterized protein {ECO:0000313|EMBL:KNA08744.1};	Serine/threonine protein kinase	GO:0005737,cytoplasm; GO:0005634,nucleus; GO:0005886,plasma membrane; GO:0005524,ATP binding; GO:0004675,transmembrane receptor protein serine/threonine kinase activity; GO:0007166,cell surface receptor signaling pathway; GO:0006952,defense response; GO:0006468,protein phosphorylation	Protein kinase domain
gene-LOC110690439	0.61	0.69	0.44	1.82	2.44	1.97	21	25	16	64	97	67	4.729	2.242	1.61738e-08	5.87653e-07	up	NW_018744041.1	1189566	1195589	+	LOC110690439	--	--	--	--	--	--	--	--
gene-LOC110690443	11.48	9.25	11.27	11.5	25.52	19.48	755	636	771	771	1928	1261	2.341	1.227	0.00116405	0.00858946	up	NW_018744041.1	1240746	1251045	-	LOC110690443	--	K01176 alpha-amylase [EC:3.2.1.1] | (RefSeq) alpha-amylase 3, chloroplastic-like (A)	alpha-amylase 3, chloroplastic-like [Chenopodium quinoa]	RecName: Full=Alpha-amylase 3, chloroplastic {ECO:0000303|PubMed:15637061}; Short=AtAMY3 {ECO:0000303|PubMed:15637061}; EC=3.2.1.1 {ECO:0000269|PubMed:24089528}; AltName: Full=1,4-alpha-D-glucan glucanohydrolase; Flags: Precursor;	SubName: Full=Uncharacterized protein {ECO:0000313|EMBL:KNA25529.1};	Alpha-amylase	GO:0009507,chloroplast; GO:0009570,chloroplast stroma; GO:0004556,alpha-amylase activity; GO:0103025,alpha-amylase activity (releasing maltohexaose); GO:0005509,calcium ion binding; GO:0005983,starch catabolic process	Alpha-amylase C-terminal beta-sheet domain
gene-LOC110690456	30.5	23.4	32.91	37.07	46.97	52.36	712	571	799	882	1259	1203	2.048	1.034	0.000548779	0.00469822	up	NW_018744041.1	1335325	1339108	-	LOC110690456	--	--	uncharacterized protein LOC110690456 [Chenopodium quinoa]	--	SubName: Full=Uncharacterized protein {ECO:0000313|EMBL:KNA06722.1};	--	GO:0016021,integral component of membrane	Uncharacterized integral membrane protein (DUF2301)
gene-LOC110690478	0.04	0	0	3.88	2.62	2.46	2	0	0	216	164	132	322.915	8.335	5.7342e-15	6.58699e-13	up	NW_018744041.1	1565167	1569726	+	LOC110690478	--	K07517 Delta3-Delta2-enoyl-CoA isomerase [EC:5.3.3.8] | (RefSeq) uncharacterized protein LOC18427060 (A)	uncharacterized protein LOC110690478 [Chenopodium quinoa]	--	SubName: Full=Uncharacterized protein {ECO:0000313|EMBL:KMS98350.1};	--	--	Myb/SANT-like DNA-binding domain
gene-LOC110690506	4.7	3.34	4.79	8.77	7.88	11.26	132	98	140	251	254	311	2.811	1.491	2.47995e-06	5.19686e-05	up	NW_018744041.1	1839915	1841422	+	LOC110690506	--	K14488 SAUR family protein | (RefSeq) auxin-responsive protein SAUR72-like (A)	auxin-responsive protein SAUR72-like [Chenopodium quinoa]	RecName: Full=Auxin-responsive protein SAUR32 {ECO:0000305}; AltName: Full=Protein ABOLISHED APICAL HOOK MAINTENANCE 1 {ECO:0000303|Ref.6}; AltName: Full=Protein SMALL AUXIN UP RNA 32 {ECO:0000303|PubMed:12036261};	SubName: Full=Uncharacterized protein {ECO:0000313|EMBL:KNA24228.1};	--	GO:0005737,cytoplasm; GO:0005634,nucleus; GO:0009734,auxin-activated signaling pathway; GO:0007275,multicellular organism development; GO:0040008,regulation of growth; GO:1900140,regulation of seedling development	Auxin responsive protein
gene-LOC110690508	0.05	0.07	0	0.12	0.2	0.62	2	3	0	5	9	24	10.465	3.388	0.00575448	0.0292167	up	NW_018744041.1	1863012	1869981	-	LOC110690508	--	--	MACPF domain-containing protein At1g14780-like, partial [Chenopodium quinoa]	RecName: Full=MACPF domain-containing protein At1g14780;	SubName: Full=Uncharacterized protein {ECO:0000313|EMBL:KNA24232.1};	--	GO:0009626,plant-type hypersensitive response	MAC/Perforin domain
gene-LOC110690513	2.73	2.69	1.79	8.61	8.33	7.15	69	71	47	222	242	178	4.379	2.13	5.71274e-16	7.74261e-14	up	NW_018744041.1	1900735	1904053	-	LOC110690513	--	--	uncharacterized protein LOC110690513 [Chenopodium quinoa]	--	SubName: Full=Uncharacterized protein {ECO:0000313|EMBL:KNA25617.1};	--	GO:0016831,carboxy-lyase activity; GO:0016787,hydrolase activity	Amidohydrolase
gene-LOC110690519	0	0	0	0.08	0.14	0.28	0	0	0	3	6	10	45.592	5.511	0.002526	0.0156486	up	NW_018744041.1	1957029	1961065	+	LOC110690519	--	K13496 UDP-glucosyl transferase 73C [EC:2.4.1.-] | (RefSeq) scopoletin glucosyltransferase (A)	uncharacterized protein LOC110690519 [Chenopodium quinoa]	--	SubName: Full=Uncharacterized protein {ECO:0000313|EMBL:KNA25623.1};	--	GO:0016021,integral component of membrane	--
gene-LOC110690533	1.44	1.18	0.79	3.24	3.05	2.2	14	12	8	32	34	21	3.238	1.695	0.00125555	0.0091202	up	NW_018744041.1	2189649	2190169	-	LOC110690533	--	K11094 U2 small nuclear ribonucleoprotein B'' | (RefSeq) U2 small nuclear ribonucleoprotein B''-like isoform X1 (A)	uncharacterized protein LOC110690533 [Chenopodium quinoa]	--	SubName: Full=Uncharacterized protein {ECO:0000313|EMBL:PHT79806.1};	--	GO:0016021,integral component of membrane	Protein of unknown function (DUF3339)
gene-LOC110690547	24.66	21.82	23.71	36.78	36.63	39.17	465	430	465	707	793	727	2.086	1.061	2.21848e-07	6.27066e-06	up	NW_018744041.1	2379762	2382514	-	LOC110690547	--	--	non-specific lipid transfer protein GPI-anchored 1-like [Chenopodium quinoa]	RecName: Full=Non-specific lipid transfer protein GPI-anchored 1; Short=AtLTPG-1; Short=Protein LTP-GPI-ANCHORED 1; Flags: Precursor;	SubName: Full=Uncharacterized protein {ECO:0000313|EMBL:KNA16415.1};	--	GO:0031225,anchored component of membrane; GO:0046658,anchored component of plasma membrane; GO:0005783,endoplasmic reticulum; GO:0005576,extracellular region; GO:0005794,Golgi apparatus; GO:0009505,plant-type cell wall; GO:0005886,plasma membrane; GO:0008289,lipid binding; GO:0042335,cuticle development; GO:0050832,defense response to fungus; GO:0006869,lipid transport	Probable lipid transfer
gene-LOC110690549	5.3	3.53	9.55	11.26	11.21	15.71	141	98	264	305	342	411	2.657	1.41	0.00155232	0.0107813	up	NW_018744041.1	2401785	2403212	+	LOC110690549	--	K18801 glucuronoxylan 4-O-methyltransferase [EC:2.1.1.112] | (RefSeq) glucuronoxylan 4-O-methyltransferase 1 (A)	probable methyltransferase At1g27930 [Chenopodium quinoa]	RecName: Full=Probable methyltransferase At1g27930; EC=2.1.1.- {ECO:0000305};	SubName: Full=Uncharacterized protein {ECO:0000313|EMBL:KNA13171.1};	--	GO:0005768,endosome; GO:0005794,Golgi apparatus; GO:0000139,Golgi membrane; GO:0016021,integral component of membrane; GO:0005802,trans-Golgi network; GO:0008168,methyltransferase activity; GO:0045492,xylan biosynthetic process	Polysaccharide biosynthesis
gene-LOC110690557	0	0	0.07	23.93	24.13	53.56	0	0	1	316	359	683	1666.72	10.703	2.87313e-17	4.83276e-15	up	NW_018744041.1	281285	281980	+	LOC110690557	--	--	miraculin-like [Chenopodium quinoa]	RecName: Full=Miraculin; Short=MIR; Flags: Precursor;	SubName: Full=Uncharacterized protein {ECO:0000313|EMBL:KNA03096.1};	--	GO:0004866,endopeptidase inhibitor activity	Trypsin and protease inhibitor
gene-LOC110690566	0	0	0	0.13	0.14	0.58	0	0	0	4	5	18	66.02	6.045	0.000700041	0.00574143	up	NW_018744041.1	844563	846248	-	LOC110690566	--	K12447 UDP-sugar pyrophosphorylase [EC:2.7.7.64] | (RefSeq) uncharacterized protein LOC109127935 (A)	uncharacterized protein LOC110690566 [Chenopodium quinoa]	RecName: Full=Retrovirus-related Pol polyprotein from transposon RE2; AltName: Full=Retro element 2 {ECO:0000303|PubMed:10689195}; Short=AtRE2 {ECO:0000303|PubMed:10689195}; Includes: RecName: Full=Protease RE2; EC=3.4.23.-; Includes: RecName: Full=Reverse transcriptase RE2; EC=2.7.7.49; Includes: RecName: Full=Endonuclease RE2;	SubName: Full=Uncharacterized protein {ECO:0000313|EMBL:KNA05629.1}; Flags: Fragment;	FOG: Transposon-encoded proteins with TYA, reverse transcriptase, integrase domains in various combinations	GO:0004190,aspartic-type endopeptidase activity; GO:0004519,endonuclease activity; GO:0046872,metal ion binding; GO:0003676,nucleic acid binding; GO:0003964,RNA-directed DNA polymerase activity; GO:0015074,DNA integration; GO:0006310,DNA recombination	gag-polypeptide of LTR copia-type
gene-LOC110690579	5.59	6.66	4.92	8.83	17.53	4.57	118	147	108	190	425	95	2.399	1.262	0.0108861	0.0474126	up	NW_018744041.1	1861649	1862782	+	LOC110690579	--	K13448 calcium-binding protein CML | (RefSeq) probable calcium-binding protein CML50 (A)	uncharacterized protein LOC110690579 [Chenopodium quinoa]	RecName: Full=BAG family molecular chaperone regulator 5, mitochondrial; AltName: Full=Bcl-2-associated athanogene 5; Flags: Precursor;	SubName: Full=Uncharacterized protein {ECO:0000313|EMBL:KNA24230.1};	--	GO:0005739,mitochondrion; GO:0009506,plasmodesma; GO:0005516,calmodulin binding; GO:0051087,chaperone binding; GO:0006457,protein folding; GO:0043207,response to external biotic stimulus; GO:0009266,response to temperature stimulus	BAG domain
gene-LOC110690590	1.71	1.7	3.03	13.98	10.15	9.26	25	26	46	208	170	133	6.591	2.72	1.08874e-13	1.03852e-11	up	NW_018744041.1	1080335	1081214	+	LOC110690590	--	K10406 kinesin family member C2/C3 | (RefSeq) kinesin-4-like isoform X1 (A)	uncharacterized protein LOC110690590 [Chenopodium quinoa]	--	SubName: Full=Uncharacterized protein {ECO:0000313|EMBL:KNA22952.1};	--	--	EB module
gene-LOC110690628	0.07	0.07	0.05	0.09	0.59	0.44	3	3	2	4	28	18	8.177	3.032	0.00277917	0.0167864	up	NW_018744062.1	34670	45697	-	LOC110690628	--	K00430 peroxidase [EC:1.11.1.7] | (RefSeq) cationic peroxidase 1-like (A)	uncharacterized protein LOC110690628 [Chenopodium quinoa]	RecName: Full=Cationic peroxidase 1; EC=1.11.1.7; AltName: Full=PNPC1; Flags: Precursor;	RecName: Full=Peroxidase {ECO:0000256|SAAS:SAAS00709852}; EC=1.11.1.7 {ECO:0000256|SAAS:SAAS00709852};	--	GO:0005576,extracellular region; GO:0020037,heme binding; GO:0046872,metal ion binding; GO:0004601,peroxidase activity; GO:0042744,hydrogen peroxide catabolic process; GO:0006979,response to oxidative stress	Peroxidase
gene-LOC110690633	0	0	0	0.16	0.04	1.57	0	0	0	4	1	37	106.132	6.73	0.000826377	0.00654559	up	NW_018744062.1	99423	101812	+	LOC110690633	--	K00430 peroxidase [EC:1.11.1.7] | (RefSeq) cationic peroxidase 1-like (A)	cationic peroxidase 1-like [Chenopodium quinoa]	RecName: Full=Cationic peroxidase 1; EC=1.11.1.7; AltName: Full=PNPC1; Flags: Precursor;	RecName: Full=Peroxidase {ECO:0000256|RuleBase:RU362060, ECO:0000256|SAAS:SAAS00709852}; EC=1.11.1.7 {ECO:0000256|RuleBase:RU362060, ECO:0000256|SAAS:SAAS00709852};	--	GO:0005576,extracellular region; GO:0020037,heme binding; GO:0046872,metal ion binding; GO:0004601,peroxidase activity; GO:0042744,hydrogen peroxide catabolic process; GO:0006979,response to oxidative stress	Peroxidase
gene-LOC110690634	0	0	0	0	0.03	1.07	0	0	0	0	1	34	90.05	6.493	0.0101592	0.045022	up	NW_018744062.1	85530	88375	+	LOC110690634	--	K00430 peroxidase [EC:1.11.1.7] | (RefSeq) cationic peroxidase 1-like (A)	cationic peroxidase 1-like [Chenopodium quinoa]	RecName: Full=Cationic peroxidase 1; EC=1.11.1.7; AltName: Full=PNPC1; Flags: Precursor;	RecName: Full=Peroxidase {ECO:0000256|RuleBase:RU362060, ECO:0000256|SAAS:SAAS00709852}; EC=1.11.1.7 {ECO:0000256|RuleBase:RU362060, ECO:0000256|SAAS:SAAS00709852};	--	GO:0005576,extracellular region; GO:0020037,heme binding; GO:0046872,metal ion binding; GO:0004601,peroxidase activity; GO:0042744,hydrogen peroxide catabolic process; GO:0006979,response to oxidative stress	Peroxidase
gene-LOC110690649	0.33	0.77	0.16	1.86	2.14	1.91	20	49	10	115	149	114	6.346	2.666	1.77997e-07	5.15098e-06	up	NW_018744062.1	423259	435256	+	LOC110690649	--	K17604 zinc finger SWIM domain-containing protein 3 | (RefSeq) protein FAR-RED IMPAIRED RESPONSE 1-like isoform X1 (A)	protein FAR-RED IMPAIRED RESPONSE 1-like isoform X1 [Chenopodium quinoa]	RecName: Full=Protein FAR1-RELATED SEQUENCE 5;	SubName: Full=Uncharacterized protein {ECO:0000313|EMBL:KNA10251.1};	--	GO:0005634,nucleus; GO:0008270,zinc ion binding; GO:0006355,regulation of transcription, DNA-templated	MULE transposase domain
gene-LOC110690651	0.93	0.68	1.03	2.39	2.53	1.59	47	36	54	123	147	79	3.178	1.668	6.34929e-06	0.000116925	up	NW_018744062.1	457664	470302	+	LOC110690651	--	--	uncharacterized protein LOC110690651 [Chenopodium quinoa]	--	SubName: Full=Uncharacterized protein {ECO:0000313|EMBL:KNA07318.1}; Flags: Fragment;	--	--	--
gene-LOC110690658	5.67	6.53	5.15	8.47	14.23	13.13	292	352	276	445	842	666	2.754	1.461	1.88669e-06	4.10432e-05	up	NW_018744062.1	634627	643962	-	LOC110690658	--	K08867 WNK lysine deficient protein kinase [EC:2.7.11.1] | (RefSeq) probable serine/threonine-protein kinase WNK5 (A)	probable serine/threonine-protein kinase WNK5 [Chenopodium quinoa]	RecName: Full=Probable serine/threonine-protein kinase WNK5; Short=AtWNK5; EC=2.7.11.1; AltName: Full=Protein kinase with no lysine 5;	SubName: Full=Uncharacterized protein {ECO:0000313|EMBL:OAY41621.1};	Serine/threonine protein kinase	GO:0005829,cytosol; GO:0005524,ATP binding; GO:0043424,protein histidine kinase binding; GO:0004672,protein kinase activity; GO:0004674,protein serine/threonine kinase activity; GO:0035556,intracellular signal transduction; GO:0048573,photoperiodism, flowering; GO:0006468,protein phosphorylation	Protein kinase domain
gene-LOC110690661	1.44	1.96	1.12	3.48	3.32	2.67	93	132	75	229	246	170	2.759	1.464	2.32833e-08	8.19878e-07	up	NW_018744062.1	671188	677743	-	LOC110690661	--	--	--	--	--	--	--	--
gene-LOC110690667	0.42	0.14	0.61	2.36	4.62	5.21	12	4	18	68	150	145	13.544	3.76	1.99898e-09	8.64727e-08	up	NW_018744062.1	836726	840914	-	LOC110690667	--	K08669 HtrA serine peptidase 2 [EC:3.4.21.108] | (RefSeq) putative protease Do-like 14 isoform X1 (A)	putative protease Do-like 14 [Chenopodium quinoa]	RecName: Full=Putative protease Do-like 14; EC=3.4.21.-;	SubName: Full=Uncharacterized protein {ECO:0000313|EMBL:KMT02190.1};	Serine protease	GO:0004252,serine-type endopeptidase activity	PDZ domain
gene-LOC110690668	0	0	0	18.25	22.69	9.75	0	0	0	607	850	313	4017.77	11.972	7.60267e-22	2.12188e-19	up	NW_018744062.1	858354	860384	+	LOC110690668	--	K17604 zinc finger SWIM domain-containing protein 3 | (RefSeq) uncharacterized protein LOC111409841 (A)	uncharacterized protein LOC110690668 [Chenopodium quinoa]	--	SubName: Full=uncharacterized protein LOC109000249 {ECO:0000313|RefSeq:XP_018832622.1};	--	--	SWIM zinc finger
gene-LOC110690670	2.26	5.44	2.38	2.36	31.68	45.84	31	78	34	33	499	619	11.155	3.48	2.61631e-05	0.000389942	up	NW_018744062.1	896367	897494	+	LOC110690670	--	--	non-specific lipid-transfer protein 1-like [Chenopodium quinoa]	RecName: Full=Non-specific lipid-transfer protein; Short=LTP; AltName: Full=GH3; Flags: Precursor;	RecName: Full=Non-specific lipid-transfer protein {ECO:0000256|RuleBase:RU000628};	--	GO:0008289,lipid binding; GO:0006869,lipid transport; GO:0090378,seed trichome elongation	Protease inhibitor/seed storage/LTP family
gene-LOC110690680	3.11	3.51	3.93	5.83	8.4	6.04	89	105	117	170	276	170	2.522	1.335	1.99755e-05	0.000311393	up	NW_018744062.1	990732	992268	+	LOC110690680	--	K19040 E3 ubiquitin-protein ligase ATL10/75/76/77/78 [EC:2.3.2.27] | (RefSeq) RING-H2 finger protein ATL74-like (A)	RING-H2 finger protein ATL74-like [Chenopodium quinoa]	RecName: Full=RING-H2 finger protein ATL74; EC=2.3.2.27 {ECO:0000305}; AltName: Full=RING-type E3 ubiquitin transferase ATL74 {ECO:0000305};	SubName: Full=Uncharacterized protein {ECO:0000313|EMBL:KNA06290.1};	FOG: Predicted E3 ubiquitin ligase	GO:0016021,integral component of membrane; GO:0046872,metal ion binding; GO:0061630,ubiquitin protein ligase activity; GO:0043161,proteasome-mediated ubiquitin-dependent protein catabolic process	Ring finger domain
gene-LOC110690699	0.54	0.49	0.36	0.79	1.01	0.9	20	19	14	30	43	33	2.563	1.358	0.00316548	0.0185604	up	NW_018744062.1	1252522	1256650	-	LOC110690699	--	K15032 mTERF domain-containing protein, mitochondrial | (RefSeq) uncharacterized protein LOC110690699 isoform X1 (A)	uncharacterized protein LOC110690699 isoform X1 [Chenopodium quinoa]	--	SubName: Full=Uncharacterized protein {ECO:0000313|EMBL:KNA20139.1};	Mitochondrial transcription termination factor, mTERF	GO:0003690,double-stranded DNA binding; GO:0006355,regulation of transcription, DNA-templated	mTERF
gene-LOC110690741	0.81	0.77	0.58	0.88	0.85	2.38	54	54	40	60	65	156	2.526	1.337	0.0107395	0.0469602	up	NW_018744062.1	1739141	1747617	+	LOC110690741	--	K13430 serine/threonine-protein kinase PBS1 [EC:2.7.11.1] | (RefSeq) serine/threonine-protein kinase PBS1-like (A)	probable LRR receptor-like serine/threonine-protein kinase At1g06840 [Chenopodium quinoa]	RecName: Full=Probable LRR receptor-like serine/threonine-protein kinase At1g06840; EC=2.7.11.1; Flags: Precursor;	SubName: Full=Uncharacterized protein {ECO:0000313|EMBL:KNA15883.1}; Flags: Fragment;	--	GO:0016021,integral component of membrane; GO:0016020,membrane; GO:0005886,plasma membrane; GO:0005524,ATP binding; GO:0004674,protein serine/threonine kinase activity	Protein kinase domain
gene-LOC110690806	0	0	0	0.09	0.16	2.5	0	0	0	2	4	54	152.634	7.254	0.000172431	0.00184675	up	NW_018744062.1	112742	115664	+	LOC110690806	--	K00430 peroxidase [EC:1.11.1.7] | (RefSeq) cationic peroxidase 1-like (A)	cationic peroxidase 1-like [Chenopodium quinoa]	RecName: Full=Cationic peroxidase 1; EC=1.11.1.7; AltName: Full=PNPC1; Flags: Precursor;	RecName: Full=Peroxidase {ECO:0000256|RuleBase:RU362060, ECO:0000256|SAAS:SAAS00709852}; EC=1.11.1.7 {ECO:0000256|RuleBase:RU362060, ECO:0000256|SAAS:SAAS00709852};	--	GO:0005576,extracellular region; GO:0020037,heme binding; GO:0046872,metal ion binding; GO:0004601,peroxidase activity; GO:0042744,hydrogen peroxide catabolic process; GO:0006979,response to oxidative stress	Peroxidase
gene-LOC110690807	1.52	1.06	0.78	2.53	1.63	3.44	30	22	16	51	37	67	2.944	1.558	0.0016271	0.0111811	up	NW_018744062.1	169110	170171	-	LOC110690807	--	--	uncharacterized protein LOC110690807 [Chenopodium quinoa]	--	SubName: Full=Uncharacterized protein {ECO:0000313|EMBL:KNA16582.1};	--	--	--
gene-LOC110690853	76.11	54.03	59.02	87.09	101.65	138.47	1190	883	960	1388	1825	2131	2.265	1.18	0.000121244	0.00138641	up	NW_018744066.1	310833	313538	-	LOC110690853	--	--	uncharacterized protein LOC110690853 [Chenopodium quinoa]	--	SubName: Full=Uncharacterized protein {ECO:0000313|EMBL:KNA25390.1};	--	GO:0016021,integral component of membrane	--
gene-LOC110690880	7.17	7.27	7.17	8.89	16.09	16.66	413	438	430	522	1065	945	2.563	1.358	6.07602e-05	0.000784488	up	NW_018744066.1	744439	750405	+	LOC110690880	--	K18469 TBC1 domain family member 5 | (RefSeq) uncharacterized protein LOC110690880 (A)	uncharacterized protein LOC110690880 [Chenopodium quinoa]	--	SubName: Full=Uncharacterized protein {ECO:0000313|EMBL:KNA16708.1};	Ypt/Rab-specific GTPase-activating protein GYP6	--	Rab-GTPase-TBC domain
gene-LOC110690894	3.11	3.95	2.52	4.62	5.56	5.73	134	178	113	203	275	243	2.202	1.139	2.32356e-05	0.000353582	up	NW_018744066.1	913307	918643	+	LOC110690894	--	K18592 gamma-glutamyltranspeptidase / glutathione hydrolase / leukotriene-C4 hydrolase [EC:2.3.2.2 3.4.19.13 3.4.19.14] | (RefSeq) gamma-glutamyltranspeptidase 3-like (A)	gamma-glutamyltranspeptidase 3-like [Chenopodium quinoa]	RecName: Full=Glutathione hydrolase 3; EC=3.4.19.13; AltName: Full=Gamma-glutamyltransferase 3; AltName: Full=Gamma-glutamyltranspeptidase 3; EC=2.3.2.2; AltName: Full=Gamma-glutamyltranspeptidase 4;	SubName: Full=Uncharacterized protein {ECO:0000313|EMBL:KNA25375.1};	Gamma-glutamyltransferase	GO:0016021,integral component of membrane; GO:0005774,vacuolar membrane; GO:0005773,vacuole; GO:0016756,glutathione gamma-glutamylcysteinyltransferase activity; GO:0036374,glutathione hydrolase activity; GO:0102953,hypoglycin A gamma-glutamyl transpeptidase activity; GO:0103068,leukotriene C4 gamma-glutamyl transferase activity; GO:0006751,glutathione catabolic process; GO:0009636,response to tox…	Gamma-glutamyltranspeptidase
gene-LOC110690897	12.82	11.73	13.96	14.25	23.33	27.42	504	482	571	571	1053	1061	2.23	1.157	0.000772105	0.00619229	up	NW_018744066.1	937151	941534	-	LOC110690897	--	K00850 6-phosphofructokinase 1 [EC:2.7.1.11] | (RefSeq) ATP-dependent 6-phosphofructokinase 6-like (A)	ATP-dependent 6-phosphofructokinase 6-like [Chenopodium quinoa]	RecName: Full=ATP-dependent 6-phosphofructokinase 6 {ECO:0000255|HAMAP-Rule:MF_03186}; Short=ATP-PFK 6 {ECO:0000255|HAMAP-Rule:MF_03186}; Short=Phosphofructokinase 6 {ECO:0000255|HAMAP-Rule:MF_03186}; EC=2.7.1.11 {ECO:0000255|HAMAP-Rule:MF_03186}; AltName: Full=Phosphohexokinase 6 {ECO:0000255|HAMAP-Rule:MF_03186};	RecName: Full=ATP-dependent 6-phosphofructokinase {ECO:0000256|HAMAP-Rule:MF_03186}; Short=ATP-PFK {ECO:0000256|HAMAP-Rule:MF_03186}; Short=Phosphofructokinase {ECO:0000256|HAMAP-Rule:MF_03186}; EC=2.7.1.11 {ECO:0000256|HAMAP-Rule:MF_03186}; AltName: Full=Phosphohexokinase {ECO:0000256|HAMAP-Rule:MF_03186};	Pyrophosphate-dependent phosphofructo-1-kinase	GO:0005829,cytosol; GO:0003872,6-phosphofructokinase activity; GO:0005524,ATP binding; GO:0046872,metal ion binding; GO:0006002,fructose 6-phosphate metabolic process; GO:0006096,glycolytic process	Phosphofructokinase
gene-LOC110690912	0.27	0	0.1	0.1	0.64	3.17	8	0	3	3	22	94	14.304	3.838	0.00421724	0.0230088	up	NW_018744066.1	1171784	1173731	+	LOC110690912	--	K01183 chitinase [EC:3.2.1.14] | (RefSeq) acidic mammalian chitinase-like (A)	acidic mammalian chitinase-like [Chenopodium quinoa]	RecName: Full=Class V chitinase {ECO:0000303|PubMed:22936594}; Short=AtChiC {ECO:0000303|PubMed:22936594}; EC=3.2.1.14 {ECO:0000269|PubMed:21390509, ECO:0000269|PubMed:22936594}; Flags: Precursor;	SubName: Full=Uncharacterized protein {ECO:0000313|EMBL:KNA14195.1};	Chitinase	GO:0005618,cell wall; GO:0005576,extracellular region; GO:0008061,chitin binding; GO:0004568,chitinase activity; GO:0008843,endochitinase activity; GO:0035885,exochitinase activity; GO:0005975,carbohydrate metabolic process; GO:0006032,chitin catabolic process; GO:0009737,response to abscisic acid; GO:0009753,response to jasmonic acid; GO:0009651,response to salt stress	Glycosyl hydrolases family 18
gene-LOC110690918	0	0	0	0.21	0.03	0.37	0	0	0	6	1	10	40.668	5.346	0.00849778	0.0394019	up	NW_018744066.1	1212237	1215056	+	LOC110690918	--	--	--	--	--	--	--	--
gene-LOC110690923	0.63	0.3	0.48	0.88	2	1.1	14	7	11	20	51	24	3.732	1.9	0.00343863	0.0197321	up	NW_018742329.1	5945571	5948146	-	LOC110690923	--	--	--	--	--	--	--	--
gene-LOC110690927	1.09	0.54	0.47	1.04	1.64	2.34	29	15	13	28	50	61	3.151	1.656	0.00502817	0.0263079	up	NW_018744066.1	1278087	1289533	+	LOC110690927	--	K01051 pectinesterase [EC:3.1.1.11] | (RefSeq) probable pectinesterase 53 (A)	probable pectinesterase 53 [Chenopodium quinoa]	RecName: Full=Probable pectinesterase 53; Short=PE 53; EC=3.1.1.11; AltName: Full=Pectin methylesterase 53; Short=AtPME53; Flags: Precursor;	RecName: Full=Pectinesterase {ECO:0000256|RuleBase:RU000589}; EC=3.1.1.11 {ECO:0000256|RuleBase:RU000589};	--	GO:0005618,cell wall; GO:0005737,cytoplasm; GO:0005576,extracellular region; GO:0045330,aspartyl esterase activity; GO:0030599,pectinesterase activity; GO:0042545,cell wall modification; GO:0045490,pectin catabolic process	Pectinesterase
gene-LOC110690931	0	0	0.03	0.13	0.13	0.08	0	0	2	10	11	6	16.726	4.064	0.00490679	0.0258426	up	NW_018742329.1	5966069	5971536	-	LOC110690931	--	K03549 KUP system potassium uptake protein | (RefSeq) potassium transporter 19-like (A)	uncharacterized protein LOC110690931 isoform X1 [Chenopodium quinoa]	--	SubName: Full=uncharacterized protein LOC107829176 {ECO:0000313|RefSeq:XP_016512128.1};	--	--	Transposase family tnp2
gene-LOC110690935	0.67	1.1	0.65	3.7	0.94	1.2	28	48	28	157	45	49	3.027	1.598	0.00369369	0.0207749	up	NW_018744066.1	1431655	1433890	+	LOC110690935	--	K15507 21S rRNA (GM2251-2'-O)-methyltransferase [EC:2.1.1.-] | (RefSeq) uncharacterized protein LOC110690935 (A)	uncharacterized protein LOC110690935 [Chenopodium quinoa]	--	SubName: Full=Uncharacterized protein {ECO:0000313|EMBL:KNA12979.1};	RNA Methylase, SpoU family	GO:0003723,RNA binding; GO:0008173,RNA methyltransferase activity; GO:0006396,RNA processing	SpoU rRNA Methylase family
gene-LOC110690943	2.37	1.3	2.89	3.16	6.62	6.41	66	38	84	90	212	176	3.229	1.691	0.000736008	0.00595815	up	NW_018744066.1	1525845	1528415	+	LOC110690943	--	K19366 spartin | (RefSeq) uncharacterized LOC105762932 (A)	senescence/dehydration-associated protein At4g35985, chloroplastic-like [Chenopodium quinoa]	RecName: Full=Senescence/dehydration-associated protein At4g35985, chloroplastic {ECO:0000305}; Flags: Precursor;	SubName: Full=Uncharacterized protein {ECO:0000313|EMBL:KNA16297.1};	--	GO:0009507,chloroplast; GO:0009409,response to cold; GO:0002239,response to oomycetes; GO:0009651,response to salt stress	Senescence-associated protein
gene-LOC110690951	5.28	4.4	5.9	11.58	10.49	10.61	234	204	272	523	534	463	2.704	1.435	1.14726e-09	5.29088e-08	up	NW_018744066.1	1668713	1674720	-	LOC110690951	--	K00029 malate dehydrogenase (oxaloacetate-decarboxylating)(NADP+) [EC:1.1.1.40] | (RefSeq) NADP-dependent malic enzyme-like (A)	NADP-dependent malic enzyme-like [Chenopodium quinoa]	RecName: Full=NADP-dependent malic enzyme; Short=NADP-ME; EC=1.1.1.40;	RecName: Full=Malic enzyme {ECO:0000256|RuleBase:RU003426};	NADP+-dependent malic enzyme	GO:0005737,cytoplasm; GO:0004471,malate dehydrogenase (decarboxylating) (NAD+) activity; GO:0004473,malate dehydrogenase (decarboxylating) (NADP+) activity; GO:0046872,metal ion binding; GO:0051287,NAD binding; GO:0008948,oxaloacetate decarboxylase activity; GO:0006108,malate metabolic process; GO:0051260,protein homooligomerization	Malic enzyme, NAD binding domain
gene-LOC110690955	2.69	1.11	1.16	4.41	3.7	6.03	67	29	30	112	106	148	3.695	1.886	7.67519e-05	0.000951582	up	NW_018744066.1	1767044	1768383	-	LOC110690955	--	--	uncharacterized protein LOC110690955 [Chenopodium quinoa]	--	SubName: Full=Uncharacterized protein {ECO:0000313|EMBL:KNA13955.1};	--	--	Cotton fibre expressed protein
gene-LOC110690964	0	0	0	4.56	4.07	3.55	0	0	0	241	242	181	1525.83	10.575	2.15305e-18	4.22513e-16	up	NW_018744066.1	1876167	1879212	+	LOC110690964	--	--	uncharacterized protein LOC110690964 [Chenopodium quinoa]	--	SubName: Full=Uncharacterized protein {ECO:0000313|EMBL:KNA09889.1};	--	GO:0005524,ATP binding	--
gene-LOC110690965	5.49	7.31	6.28	6.81	15.96	10.78	148	206	176	187	494	286	2.36	1.239	0.00172381	0.0117005	up	NW_018744066.1	1928415	1929862	-	LOC110690965	--	K09286 EREBP-like factor | (RefSeq) ethylene-responsive transcription factor TINY-like (A)	ethylene-responsive transcription factor TINY-like [Chenopodium quinoa]	RecName: Full=Ethylene-responsive transcription factor TINY;	SubName: Full=Uncharacterized protein {ECO:0000313|EMBL:KNA13484.1}; Flags: Fragment;	--	GO:0005634,nucleus; GO:0003677,DNA binding; GO:0003700,DNA-binding transcription factor activity; GO:0006351,transcription, DNA-templated	AP2 domain
gene-LOC110690989	1.23	1.33	0.92	3.07	1.82	1.63	46	52	36	117	78	60	2.402	1.264	0.000261218	0.00259551	up	NW_018742329.1	6091177	6095294	+	LOC110690989	--	--	--	--	--	--	--	--
gene-LOC110691011	4	6.56	5.38	6.64	8.35	9.36	95	163	133	161	228	219	2.027	1.019	0.00100335	0.00761878	up	NW_018744066.1	2485361	2492921	+	LOC110691011	--	--	protein LIKE COV 1-like [Chenopodium quinoa]	RecName: Full=Protein CONTINUOUS VASCULAR RING 1 {ECO:0000303|PubMed:12668628};	SubName: Full=Uncharacterized protein {ECO:0000313|EMBL:KNA12385.1};	--	GO:0005794,Golgi apparatus; GO:0016021,integral component of membrane; GO:0010222,stem vascular tissue pattern formation	Protein of unknown function (DUF502)
gene-LOC110691019	34.28	30.55	39.32	36.84	60.06	64.18	1433	1335	1710	1570	2883	2641	2.037	1.027	0.00188128	0.0125036	up	NW_018744066.1	2613128	2617892	+	LOC110691019	--	K17710 pentatricopeptide repeat domain-containing protein 1 | (RefSeq) pentatricopeptide repeat-containing protein At5g25630-like (A)	pentatricopeptide repeat-containing protein At5g25630-like [Chenopodium quinoa]	RecName: Full=Pentatricopeptide repeat-containing protein At5g21222; AltName: Full=SNF1-like protein kinase AtC401;	SubName: Full=Uncharacterized protein {ECO:0000313|EMBL:KNA15316.1};	FOG: PPR repeat	GO:0043231,intracellular membrane-bounded organelle; GO:0005524,ATP binding; GO:0004519,endonuclease activity; GO:0004672,protein kinase activity; GO:0003723,RNA binding; GO:0009451,RNA modification	PPR repeat family
gene-LOC110691034	1.66	0.85	0.9	1.42	3.18	5.01	39	21	22	34	86	116	3.754	1.909	0.00171515	0.0116522	up	NW_018744066.1	2849525	2852048	-	LOC110691034	--	K09419 heat shock transcription factor, other eukaryote | (RefSeq) heat stress transcription factor C-1-like (A)	heat stress transcription factor C-1-like [Chenopodium quinoa]	RecName: Full=Heat stress transcription factor C-1; Short=AtHsfC1; AltName: Full=AtHsf-08;	SubName: Full=HSF_DNA-bind domain-containing protein {ECO:0000313|EMBL:GAV82131.1};	Heat shock transcription factor	GO:0005634,nucleus; GO:0003700,DNA-binding transcription factor activity; GO:0043565,sequence-specific DNA binding; GO:0006351,transcription, DNA-templated	HSF-type DNA-binding
gene-LOC110691049	0.71	1.54	1.77	8.83	1.54	2.56	22	50	57	279	55	78	3.944	1.98	0.00194676	0.0128279	up	NW_018742329.1	6544508	6549431	-	LOC110691049	--	--	--	--	--	--	--	--
gene-LOC110691051	32.22	38.27	39.01	57.59	63.24	52	1596	1981	2010	2908	3597	2535	2.06	1.043	1.28795e-07	3.83009e-06	up	NW_018744066.1	3066355	3074602	+	LOC110691051	--	K17471 sulfate transporter 3 | (RefSeq) probable sulfate transporter 3.5 (A)	probable sulfate transporter 3.5 [Chenopodium quinoa]	RecName: Full=Probable sulfate transporter 3.5;	SubName: Full=Uncharacterized protein {ECO:0000313|EMBL:KNA22166.1};	Sulfate/bicarbonate/oxalate exchanger SAT-1 and related transporters (SLC26 family)	GO:0005887,integral component of plasma membrane; GO:0008271,secondary active sulfate transmembrane transporter activity; GO:0015116,sulfate transmembrane transporter activity; GO:0015293,symporter activity	Sulfate permease family
gene-LOC110691055	1.88	1.05	1.78	1.79	6.89	5.27	65	38	64	63	273	179	3.936	1.977	0.000644983	0.00536935	up	NW_018744066.1	3149784	3154445	+	LOC110691055	--	K23544 serine incorporator 1/3 | (RefSeq) probable serine incorporator (A)	probable serine incorporator [Chenopodium quinoa]	--	SubName: Full=Uncharacterized protein {ECO:0000313|EMBL:KNA08092.1};	Tumor differentially expressed (TDE) protein	GO:0016021,integral component of membrane	Serine incorporator (Serinc)
gene-LOC110691110	0	0	0.07	0.07	0.43	0.89	0	0	2	2	13	23	25.021	4.645	0.0042177	0.0230088	up	NW_018744066.1	1378043	1381682	+	LOC110691110	--	K18327 RNA exonuclease 4 [EC:3.1.-.-] | (RefSeq) RNA exonuclease 5-like (A)	apoptosis-enhancing nuclease-like [Chenopodium quinoa]	RecName: Full=Small RNA degrading nuclease 1; EC=3.1.-.-;	SubName: Full=RNA exonuclease 4-like {ECO:0000313|RefSeq:XP_010251266.1};	3'-5' exonuclease	GO:0005634,nucleus; GO:0008408,3'-5' exonuclease activity; GO:0003676,nucleic acid binding; GO:0010587,miRNA catabolic process	Exonuclease
gene-LOC110691174	0	0	0	2.38	0.54	0.83	0	0	0	130	33	44	463.651	8.857	9.23668e-11	5.28905e-09	up	NW_018744069.1	362685	365561	+	LOC110691174	--	K00799 glutathione S-transferase [EC:2.5.1.18] | (RefSeq) uncharacterized protein LOC110786294 (A)	uncharacterized protein LOC110691174 isoform X1 [Chenopodium quinoa]	--	SubName: Full=Uncharacterized protein {ECO:0000313|EMBL:CCA66054.1};	FOG: Reverse transcriptase	GO:0003676,nucleic acid binding	Reverse transcriptase-like
gene-LOC110691182	1.39	0.85	1.9	1.31	5.82	4.93	28	18	40	27	135	98	3.87	1.952	0.00355201	0.0201494	up	NW_018744069.1	1254702	1262023	-	LOC110691182	--	--	--	--	--	--	--	--
gene-LOC110691196	0.8	1.07	0.72	1.73	1.32	1.22	46	64	43	101	87	69	2.145	1.101	0.000181953	0.00193203	up	NW_018744072.1	530138	533886	-	LOC110691196	--	--	--	--	--	--	--	--
gene-LOC110691228	0	0	0	3.94	1.07	0.79	0	0	0	98	30	19	324.68	8.343	4.92191e-09	1.97705e-07	up	NW_018744072.1	1800606	1803418	+	LOC110691228	--	K05391 cyclic nucleotide gated channel, plant | (RefSeq) cyclic nucleotide-gated ion channel 1-like (A)	uncharacterized protein LOC110691228 isoform X1 [Chenopodium quinoa]	RecName: Full=Probable cyclic nucleotide-gated ion channel 10; AltName: Full=CaM-regulated potassium ion channel; AltName: Full=Cyclic nucleotide- and calmodulin-regulated ion channel 10;	SubName: Full=cyclic nucleotide-gated ion channel 1-like {ECO:0000313|RefSeq:XP_010266494.1};	K+-channel ERG and related proteins, contain PAS/PAC sensor domain	GO:0005887,integral component of plasma membrane; GO:0005516,calmodulin binding; GO:0030552,cAMP binding; GO:0030553,cGMP binding; GO:0005249,voltage-gated potassium channel activity; GO:0042391,regulation of membrane potential	--
gene-LOC110691238	1.87	1.85	1.43	4.19	1.96	2.14	64	66	51	146	77	72	2.048	1.034	0.00383596	0.0213804	up	NW_018744072.1	1921673	1924118	+	LOC110691238	--	--	--	--	--	--	--	--
gene-LOC110691252	49.09	47.75	50.53	54.97	76.97	96.09	721	733	772	823	1298	1389	2.043	1.03	0.00069722	0.00572203	up	NW_018744072.1	2275854	2280840	-	LOC110691252	--	K06891 ATP-dependent Clp protease adaptor protein ClpS | (RefSeq) ATP-dependent Clp protease adapter protein CLPS1, chloroplastic-like (A)	ATP-dependent Clp protease adapter protein CLPS1, chloroplastic-like [Chenopodium quinoa]	RecName: Full=ATP-dependent Clp protease adapter protein CLPS1, chloroplastic {ECO:0000303|Ref.6}; Flags: Precursor;	SubName: Full=Uncharacterized protein {ECO:0000313|EMBL:KNA13755.1};	--	GO:0009570,chloroplast stroma; GO:0005840,ribosome; GO:0008233,peptidase activity; GO:0030163,protein catabolic process	ATP-dependent Clp protease adaptor protein ClpS
gene-LOC110691268	2.75	3.35	4.58	4.33	6.97	8.75	63	80	109	101	183	197	2.476	1.308	0.00200123	0.0131089	up	NW_018744072.1	2735955	2737183	+	LOC110691268	--	K20893 probable galacturonosyltransferase-like 1 [EC:2.4.1.-] | (RefSeq) probable galacturonosyltransferase-like 1 (A)	probable galacturonosyltransferase-like 3 [Chenopodium quinoa]	RecName: Full=Probable galacturonosyltransferase-like 3; EC=2.4.1.-;	RecName: Full=Hexosyltransferase {ECO:0000256|RuleBase:RU362027}; EC=2.4.1.- {ECO:0000256|RuleBase:RU362027};	--	GO:0005794,Golgi apparatus; GO:0000139,Golgi membrane; GO:0016021,integral component of membrane; GO:0047262,polygalacturonate 4-alpha-galacturonosyltransferase activity; GO:0016757,transferase activity, transferring glycosyl groups; GO:0071555,cell wall organization; GO:0045489,pectin biosynthetic process; GO:0000271,polysaccharide biosynthetic process	Glycosyl transferase family 8
gene-LOC110691317	0	0	0	0	0.1	2	0	0	0	0	2	33	89.713	6.487	0.00776728	0.0368259	up	NW_018744072.1	1556632	1558467	+	LOC110691317	--	K00432 glutathione peroxidase [EC:1.11.1.9] | (RefSeq) probable glutathione peroxidase 4 (A)	probable glutathione peroxidase 4 [Chenopodium quinoa]	RecName: Full=Probable glutathione peroxidase 4; EC=1.11.1.9;	RecName: Full=Glutathione peroxidase {ECO:0000256|RuleBase:RU000499};	Glutathione peroxidase	GO:0005829,cytosol; GO:0012505,endomembrane system; GO:0004602,glutathione peroxidase activity; GO:0006979,response to oxidative stress	Glutathione peroxidase
gene-LOC110691323	1.56	0.88	1.06	4.67	1.91	2.7	17	10	12	52	24	29	3.355	1.746	0.0016776	0.011455	up	NW_018744072.1	2778974	2779560	-	LOC110691323	--	--	uncharacterized protein LOC110693867 [Chenopodium quinoa]	--	SubName: Full=Uncharacterized protein {ECO:0000313|EMBL:KMS97389.1};	--	--	DVL family
gene-LOC110691327	0	0	0.11	2.81	0.73	2.67	0	0	2	48	14	44	67.372	6.074	1.86035e-06	4.05404e-05	up	NW_018744075.1	28940	29838	+	LOC110691327	--	--	uncharacterized protein LOC110727417 [Chenopodium quinoa]	--	SubName: Full=Photoconvertible water-soluble chlorophyll-binding protein 2 {ECO:0000313|EMBL:BAQ20625.1};	--	--	Protein of unknown function, DUF538
gene-LOC110691375	4.55	4.32	7.09	6.27	8.99	9.21	218	216	353	306	494	434	2	1	0.00524275	0.0271602	up	NW_018744080.1	70854	74452	+	LOC110691375	--	K22184 bromodomain-containing protein 9 | (RefSeq) uncharacterized protein LOC112007239 (A)	eukaryotic translation initiation factor 5B-like isoform X1 [Chenopodium quinoa]	--	SubName: Full=Uncharacterized protein {ECO:0000313|EMBL:KNA20306.1};	--	GO:0003677,DNA binding	Bromodomain
gene-LOC110691423	1.03	0.55	2.71	2.82	5.35	4.45	39	22	107	109	233	166	3.771	1.915	0.00231206	0.0145919	up	NW_018744080.1	1309217	1312050	-	LOC110691423	--	K00975 glucose-1-phosphate adenylyltransferase [EC:2.7.7.27] | (RefSeq) putative two-component response regulator ARR21 (A)	myb-related protein 2-like isoform X1 [Chenopodium quinoa]	RecName: Full=Myb-related protein 2 {ECO:0000303|PubMed:21255164}; AltName: Full=Myb family transcription factor PHL9 {ECO:0000305}; AltName: Full=Protein NITROGEN STARVATION RESPONSE 1 {ECO:0000303|PubMed:15592750}; Short=AtNSR1 {ECO:0000303|PubMed:15592750}; AltName: Full=Protein PHR1-LIKE 9 {ECO:0000305};	SubName: Full=Uncharacterized protein {ECO:0000313|EMBL:KNA21859.1};	--	GO:0005634,nucleus; GO:0003677,DNA binding; GO:0003700,DNA-binding transcription factor activity; GO:0006351,transcription, DNA-templated	MYB-CC type transfactor, LHEQLE motif
gene-LOC110691424	3.91	2.28	5.34	7.75	9.95	14.08	143	87	203	289	418	507	3.57	1.836	3.28519e-05	0.000472261	up	NW_018744080.1	1356207	1373826	-	LOC110691424	--	K08726 soluble epoxide hydrolase / lipid-phosphate phosphatase [EC:3.3.2.10 3.1.3.76] | (RefSeq) uncharacterized protein LOC105643456 (A)	uncharacterized protein LOC110691424 isoform X1 [Chenopodium quinoa]	--	SubName: Full=Uncharacterized protein {ECO:0000313|EMBL:KNA09071.1};	Soluble epoxide hydrolase	GO:0003824,catalytic activity	alpha/beta hydrolase fold
gene-LOC110691435	0.07	0.03	0.13	0.68	1.23	0.23	2	1	4	21	43	7	12.412	3.634	0.000273399	0.00269381	up	NW_018744080.1	1632467	1635136	+	LOC110691435	--	--	--	--	--	--	--	--
gene-LOC110691437	1.89	2.58	2.04	3.24	2.95	4.58	66	94	74	115	118	157	2.173	1.119	0.000413528	0.00373822	up	NW_018744080.1	1702327	1705347	+	LOC110691437	--	K01184 polygalacturonase [EC:3.2.1.15] | (RefSeq) LOC109764960; polygalacturonase ADPG1-like (A)	polygalacturonase ADPG2-like [Chenopodium quinoa]	RecName: Full=Probable polygalacturonase; Short=PG {ECO:0000250|UniProtKB:Q7M1E7}; EC=3.2.1.15; AltName: Full=Pectinase {ECO:0000250|UniProtKB:Q7M1E7};	SubName: Full=Uncharacterized protein {ECO:0000313|EMBL:KNA07199.1};	--	GO:0016021,integral component of membrane; GO:0004650,polygalacturonase activity; GO:0005975,carbohydrate metabolic process	Glycosyl hydrolases family 28
gene-LOC110691450	7.69	6.62	8.24	13.77	22.89	19.87	280	252	312	511	957	712	3.299	1.722	9.57895e-08	2.93189e-06	up	NW_018744080.1	1928111	1932886	-	LOC110691450	--	K03797 carboxyl-terminal processing protease [EC:3.4.21.102] | (RefSeq) carboxyl-terminal-processing peptidase 3, chloroplastic-like (A)	carboxyl-terminal-processing peptidase 3, chloroplastic-like [Chenopodium quinoa]	RecName: Full=Carboxyl-terminal-processing peptidase 3, chloroplastic; EC=3.4.21.102; AltName: Full=D1 C-terminal processing protease 3; AltName: Full=Photosystem II D1 protein processing peptidase 3; Flags: Precursor;	SubName: Full=Uncharacterized protein {ECO:0000313|EMBL:KNA04809.1};	--	GO:0009543,chloroplast thylakoid lumen; GO:0016020,membrane; GO:0004175,endopeptidase activity; GO:0008236,serine-type peptidase activity	Peptidase family S41
gene-LOC110691455	1.12	1.2	1.05	2.06	1.78	1.78	41	46	40	77	75	64	2.169	1.117	0.000173521	0.00185736	up	NW_018744080.1	2151964	2153930	+	LOC110691455	--	K10251 17beta-estradiol 17-dehydrogenase / very-long-chain 3-oxoacyl-CoA reductase [EC:1.1.1.62 1.1.1.330] | (RefSeq) uncharacterized protein LOC111404819 (A)	zinc finger MYM-type protein 1-like [Chenopodium quinoa]	--	SubName: Full=HAT family dimerization domain protein {ECO:0000313|EMBL:ACX94087.1};	--	GO:0046983,protein dimerization activity	Domain of unknown function (DUF4371)
gene-LOC110691473	23.78	23.46	27.39	67.82	53.47	39.36	836	862	1002	2431	2159	1362	2.755	1.462	4.79589e-10	2.38705e-08	up	NW_018744080.1	2460821	2464193	-	LOC110691473	--	K13260 isoflavone/4'-methoxyisoflavone 2'-hydroxylase [EC:1.14.13.89 1.14.13.53] | (RefSeq) hypothetical protein (A)	cytochrome P450 81E8-like [Chenopodium quinoa]	RecName: Full=Cytochrome P450 81E8 {ECO:0000303|PubMed:14617078}; EC=1.14.13.- {ECO:0000305};	SubName: Full=Cytochrome P450 81AG1 {ECO:0000313|EMBL:BAU59408.1};	Cytochrome P450 CYP2 subfamily	GO:0016021,integral component of membrane; GO:0020037,heme binding; GO:0005506,iron ion binding; GO:0004497,monooxygenase activity; GO:0016705,oxidoreductase activity, acting on paired donors, with incorporation or reduction of molecular oxygen	Cytochrome P450
gene-LOC110691482	4.18	6.47	5.3	9.05	7.62	9.64	240	388	316	529	502	544	2.16	1.111	5.91137e-07	1.47307e-05	up	NW_018744080.1	2786744	2791171	+	LOC110691482	--	K13412 calcium-dependent protein kinase [EC:2.7.11.1] | (RefSeq) calcium-dependent protein kinase 32-like (A)	calcium-dependent protein kinase 32-like [Chenopodium quinoa]	RecName: Full=Calcium-dependent protein kinase 32 {ECO:0000303|Ref.5}; EC=2.7.11.1 {ECO:0000305};	SubName: Full=Calcium dependent protein kinase 3 {ECO:0000313|EMBL:AFR11232.1};	Ca2+/calmodulin-dependent protein kinase, EF-Hand protein superfamily	GO:0005737,cytoplasm; GO:0005634,nucleus; GO:0005886,plasma membrane; GO:0009506,plasmodesma; GO:0005524,ATP binding; GO:0005509,calcium ion binding; GO:0004698,calcium-dependent protein kinase C activity; GO:0005516,calmodulin binding; GO:0004683,calmodulin-dependent protein kinase activity; GO:0009738,abscisic acid-activated signaling pathway; GO:0035556,intracellular signal transduction; GO:00…	Protein kinase domain
gene-LOC110691490	0	0	0.1	2.37	1.05	1.23	0	0	2	48	24	24	59.784	5.902	9.30822e-07	2.19609e-05	up	NW_018744080.1	2924644	2927443	+	LOC110691490	--	K11649 SWI/SNF related-matrix-associated actin-dependent regulator of chromatin subfamily C | (RefSeq) CHB3501; predicted protein (A)	uncharacterized protein LOC110691490 [Chenopodium quinoa]	--	SubName: Full=Uncharacterized protein {ECO:0000313|EMBL:KNA20607.1};	--	GO:0015035,protein disulfide oxidoreductase activity	DSBA-like thioredoxin domain
gene-LOC110691500	330.57	257.27	348.72	511.43	657.15	615.56	27905	22699	30622	44008	63697	51144	2.481	1.311	1.3388e-06	3.02962e-05	up	NW_018744080.1	3067034	3073426	-	LOC110691500	--	K03403 magnesium chelatase subunit H [EC:6.6.1.1] | (RefSeq) magnesium-chelatase subunit ChlH, chloroplastic-like (A)	magnesium-chelatase subunit ChlH, chloroplastic-like [Chenopodium quinoa]	RecName: Full=Magnesium-chelatase subunit ChlH, chloroplastic; Short=Mg-chelatase subunit H; EC=6.6.1.1; AltName: Full=ABA-binding protein; AltName: Full=Mg-protoporphyrin IX chelatase subunit ChlH; AltName: Full=Protein CONDITIONAL CHLORINA; AltName: Full=Protein GENOMES UNCOUPLED 5; AltName: Full=Protein RAPID TRANSPIRATION IN DETACHED LEAVES 1; Flags: Precursor;	SubName: Full=Uncharacterized protein {ECO:0000313|EMBL:KNA17233.1};	--	GO:0009507,chloroplast; GO:0009706,chloroplast inner membrane; GO:0009570,chloroplast stroma; GO:0010007,magnesium chelatase complex; GO:0005739,mitochondrion; GO:0005524,ATP binding; GO:0016851,magnesium chelatase activity; GO:0015995,chlorophyll biosynthetic process; GO:0015979,photosynthesis	CobN/Magnesium Chelatase
gene-LOC110691510	10.61	8.09	11.38	34.25	33.01	42.9	408	325	455	1342	1457	1623	4.741	2.245	3.3943e-16	4.77203e-14	up	NW_018744080.1	3230790	3232854	-	LOC110691510	--	--	uncharacterized protein LOC110691510 [Chenopodium quinoa]	--	SubName: Full=Uncharacterized protein {ECO:0000313|EMBL:KNA23380.1};	--	--	--
gene-LOC110691544	0.44	0.56	1.68	10.6	27.22	15.01	13	17	51	316	914	432	25.759	4.687	6.32143e-15	7.17406e-13	up	NW_018744080.1	3810930	3812500	+	LOC110691544	--	K13495 cis-zeatin O-glucosyltransferase [EC:2.4.1.215] | (RefSeq) zeatin O-glucosyltransferase-like (A)	zeatin O-glucosyltransferase-like [Chenopodium quinoa]	RecName: Full=Zeatin O-glucosyltransferase; EC=2.4.1.203; AltName: Full=Trans-zeatin O-beta-D-glucosyltransferase;	RecName: Full=Glycosyltransferase {ECO:0000256|RuleBase:RU362057}; EC=2.4.1.- {ECO:0000256|RuleBase:RU362057};	UDP-glucuronosyl and UDP-glucosyl transferase	GO:0050403,trans-zeatin O-beta-D-glucosyltransferase activity; GO:0050404,zeatin O-beta-D-xylosyltransferase activity; GO:0009690,cytokinin metabolic process; GO:0048439,flower morphogenesis; GO:0009965,leaf morphogenesis; GO:0045926,negative regulation of growth; GO:0006486,protein glycosylation; GO:0010380,regulation of chlorophyll biosynthetic process; GO:0010083,regulation of vegetative meris…	UDP-glucoronosyl and UDP-glucosyl transferase
gene-LOC110691548	0.2	0	0.06	1.58	1.23	3.01	3	0	1	24	21	44	28.658	4.841	1.96865e-06	4.25802e-05	up	NW_018744080.1	3869630	3872842	-	LOC110691548	--	--	protein FATTY ACID EXPORT 7-like [Chenopodium quinoa]	RecName: Full=Protein FATTY ACID EXPORT 7 {ECO:0000303|PubMed:25646734}; Short=At-FAX7 {ECO:0000303|PubMed:25646734};	SubName: Full=Uncharacterized protein {ECO:0000313|EMBL:KNA13616.1};	Predicted membrane protein	GO:0016021,integral component of membrane; GO:0005739,mitochondrion	Transmembrane proteins 14C
gene-LOC110691556	23.65	21.54	25.5	50.79	39.94	52.13	460	438	516	1007	892	998	2.609	1.383	1.56999e-10	8.56065e-09	up	NW_018744080.1	4009109	4010153	+	LOC110691556	--	--	--	--	--	--	--	--
gene-LOC110691567	5.01	1.04	8.22	16.18	47.69	50.6	106	23	181	349	1159	1054	10.375	3.375	2.00569e-06	4.32573e-05	up	NW_018744080.1	4173367	4175265	-	LOC110691567	--	K13448 calcium-binding protein CML | (RefSeq) probable calcium-binding protein CML49 (A)	probable calcium-binding protein CML49 [Chenopodium quinoa]	RecName: Full=Probable calcium-binding protein CML49; AltName: Full=Calmodulin-like protein 49;	SubName: Full=Uncharacterized protein {ECO:0000313|EMBL:KNA07557.1};	Ca2+-binding protein, EF-Hand protein superfamily	GO:0005737,cytoplasm; GO:0005509,calcium ion binding; GO:0004198,calcium-dependent cysteine-type endopeptidase activity; GO:0006508,proteolysis	EF-hand domain
gene-LOC110691603	2.97	2.27	4.21	4.33	8.65	7.8	80	64	118	119	268	207	2.887	1.53	0.00065355	0.00542389	up	NW_018744080.1	3590914	3592513	+	LOC110691603	--	K15078 structure-specific endonuclease subunit SLX1 [EC:3.6.1.-] | (RefSeq) putative disease resistance protein RGA1 (A)	putative disease resistance protein RGA1 [Chenopodium quinoa]	RecName: Full=Putative disease resistance protein RGA1; AltName: Full=RGA3-blb;	SubName: Full=Uncharacterized protein {ECO:0000313|EMBL:KNA13354.1};	Apoptotic ATPase	GO:0043531,ADP binding; GO:0005524,ATP binding; GO:0006952,defense response	NB-ARC domain
gene-LOC110691728	0	0	0	0.2	0.21	0.12	0	0	0	5	6	3	31.959	4.998	0.00860782	0.0397994	up	NW_018742204.1	2831237	2832900	-	LOC110691728	--	--	--	--	--	--	--	--
gene-LOC110691775	23.21	16.55	44.68	59.17	66.06	75.44	2996	2233	6001	7787	9793	9587	3.041	1.604	0.0001274	0.00144236	up	NW_018744092.1	1352206	1361510	+	LOC110691775	--	K18757 la-related protein 1 | (RefSeq) la-related protein 1A-like (A)	zinc finger MYM-type protein 1-like isoform X1 [Chenopodium quinoa]	--	SubName: Full=Putative transposase {ECO:0000313|EMBL:AAL86479.1};	--	GO:0005737,cytoplasm; GO:0005654,nucleoplasm; GO:0003677,DNA binding; GO:0046983,protein dimerization activity; GO:0000981,DNA-binding transcription factor activity, RNA polymerase II-specific	Domain of unknown function (DUF4371)
gene-LOC110691784	0.24	0.46	0.17	0.59	0.76	0.77	8	16	6	20	29	25	3.236	1.694	0.00464888	0.0247857	up	NW_018744092.1	1534587	1538992	-	LOC110691784	--	K19891 glucan endo-1,3-beta-glucosidase 1/2/3 [EC:3.2.1.39] | (RefSeq) hypothetical protein (A)	glucan endo-1,3-beta-glucosidase 12-like [Chenopodium quinoa]	RecName: Full=Glucan endo-1,3-beta-glucosidase 7; EC=3.2.1.39; AltName: Full=(1->3)-beta-glucan endohydrolase 7; Short=(1->3)-beta-glucanase 7; AltName: Full=Beta-1,3-endoglucanase 7; Short=Beta-1,3-glucanase 7; Flags: Precursor;	SubName: Full=Uncharacterized protein {ECO:0000313|EMBL:KMT02276.1};	--	GO:0046658,anchored component of plasma membrane; GO:0005618,cell wall; GO:0005576,extracellular region; GO:0042973,glucan endo-1,3-beta-D-glucosidase activity; GO:0004553,hydrolase activity, hydrolyzing O-glycosyl compounds; GO:0030247,polysaccharide binding; GO:0005975,carbohydrate metabolic process; GO:0071555,cell wall organization	X8 domain
gene-LOC110691840	655.93	485.79	1225	1060.93	2046.45	2122.66	12637	9782	24550	20835	45271	40250	2.878	1.525	0.00109938	0.00821057	up	NW_018744092.1	2637148	2638595	+	LOC110691840	--	K08913 light-harvesting complex II chlorophyll a/b binding protein 2 | (RefSeq) chlorophyll a-b binding protein 5, chloroplastic (A)	chlorophyll a-b binding protein 5, chloroplastic [Chenopodium quinoa]	RecName: Full=Chlorophyll a-b binding protein 36, chloroplastic; AltName: Full=LHCII type I CAB-36; Short=LHCP; Flags: Precursor;	RecName: Full=Chlorophyll a-b binding protein, chloroplastic {ECO:0000256|RuleBase:RU363080};	--	GO:0009535,chloroplast thylakoid membrane; GO:0016021,integral component of membrane; GO:0009522,photosystem I; GO:0009523,photosystem II; GO:0016168,chlorophyll binding; GO:0046872,metal ion binding; GO:0009765,photosynthesis, light harvesting; GO:0018298,protein-chromophore linkage	Chlorophyll A-B binding protein
gene-LOC110691843	3.64	3.06	3.5	4.58	6.28	8.42	232	204	232	298	460	529	2.492	1.317	9.9943e-05	0.00117787	up	NW_018744092.1	2646470	2673386	-	LOC110691843	--	--	uncharacterized protein LOC110691843 isoform X1 [Chenopodium quinoa]	--	SubName: Full=Uncharacterized protein {ECO:0000313|EMBL:KNA08157.1};	--	GO:0016021,integral component of membrane	Plant protein of unknown function (DUF639)
gene-LOC110691897	26.84	23.39	24.42	34.58	38.72	47.72	1180	1075	1117	1550	1955	2065	2.123	1.086	1.18059e-05	0.000197492	up	NW_018744092.1	3571422	3575774	+	LOC110691897	--	--	uncharacterized protein ycf45-like [Chenopodium quinoa]	RecName: Full=Uncharacterized protein ycf45; AltName: Full=ORF565;	SubName: Full=Uncharacterized protein {ECO:0000313|EMBL:KNA20588.1};	--	GO:0009507,chloroplast; GO:0005524,ATP binding; GO:0003676,nucleic acid binding	AAA domain
gene-LOC110691899	4.06	3.48	4.26	6.07	8.55	9.92	67	60	73	102	162	161	2.733	1.451	6.04175e-05	0.00078093	up	NW_018744092.1	3583532	3588542	-	LOC110691899	--	K01052 lysosomal acid lipase/cholesteryl ester hydrolase [EC:3.1.1.13] | (RefSeq) triacylglycerol lipase 2-like (A)	uncharacterized protein LOC110691899 [Chenopodium quinoa]	--	SubName: Full=Uncharacterized protein {ECO:0000313|EMBL:KNA20587.1};	--	GO:0016021,integral component of membrane	--
gene-LOC110691904	0.8	0.31	0.73	1.5	1.68	3.51	20	8	19	38	48	86	4.708	2.235	0.000316983	0.00303206	up	NW_018744092.1	3694216	3696055	-	LOC110691904	--	K05933 aminocyclopropanecarboxylate oxidase [EC:1.14.17.4] | (RefSeq) LOW QUALITY PROTEIN: 1-aminocyclopropane-1-carboxylate oxidase 4-like (A)	LOW QUALITY PROTEIN: 1-aminocyclopropane-1-carboxylate oxidase 4-like [Chenopodium quinoa]	RecName: Full=1-aminocyclopropane-1-carboxylate oxidase 4; Short=ACC oxidase 4; EC=1.14.17.4; AltName: Full=Ethylene-forming enzyme; Short=EFE;	SubName: Full=Uncharacterized protein {ECO:0000313|EMBL:KNA06323.1};	Iron/ascorbate family oxidoreductases	GO:0009815,1-aminocyclopropane-1-carboxylate oxidase activity; GO:0031418,L-ascorbic acid binding; GO:0046872,metal ion binding; GO:0009693,ethylene biosynthetic process	2OG-Fe(II) oxygenase superfamily
gene-LOC110691913	17.23	12.68	21.14	28.69	33.15	48.11	373	287	476	633	824	1025	2.799	1.485	3.32406e-05	0.000476938	up	NW_018744092.1	3793748	3796149	-	LOC110691913	--	--	uncharacterized protein LOC110691913 [Chenopodium quinoa]	--	SubName: Full=Uncharacterized protein {ECO:0000313|EMBL:KNA19728.1};	--	GO:0016021,integral component of membrane	--
[truncated: 5,842 more rows]
