# Supplementary material for: Elucidating the Differentiation Synthesis Mechanisms of Differently Colored Resistance Quinoa Seedings Using Metabolite Profiling and Transcriptome Analysis
Source: Metabolites. 2023 Oct 10;13(10):1065. doi: 10.3390/metabo13101065 (PMC10609267; doi:10.3390/metabo13101065)
Supplement: Supplementary file 1 [file metabolites-13-01065-s001.zip › Table S19.xlsx]

## Sheet: Sheet1
Table S19 Number of differential genes in R-WvsR-B
ID	R-B1_fpkm	R-B2_fpkm	R-B3_fpkm	R-W1_fpkm	R-W2_fpkm	R-W3_fpkm	R-B1_count	R-B2_count	R-B3_count	R-W1_count	R-W2_count	R-W3_count	FoldChange	log2FoldChange	pvalue	padj	regulated	chr	start	end	strand	gene_name	gene_description	KEGG	NR	Swissprot	Tremble	KOG	GO	Pfam
gene-CDC77_pgr001	2.2	1.78	2.76	0.29	0.17	0.76	67	53	74	8	5	22	6.786	2.763	7.00669e-06	0.000171687	up	NC_034949.1	135545	137035	-	rrn16	--	--	--	--	--	--	--	--
gene-CDC77_pgr002	1.01	0.86	1.55	0.42	0.18	0.74	58	48	78	22	10	40	3.118	1.64	0.00572386	0.0384672	up	NC_034949.1	130273	133082	-	rrn23	--	--	--	--	--	--	--	--
gene-CDC77_pgr007	2.46	2.53	3.61	1.61	0.99	1.23	141	142	182	84	54	67	2.799	1.485	1.26704e-05	0.00028394	up	NC_034949.1	102600	105409	+	rrn23	--	--	--	--	--	--	--	--
gene-CDC77_pgr008	3.85	2.35	5.79	1.15	0.76	1.35	117	70	155	32	22	39	4.599	2.201	4.94144e-06	0.000127808	up	NC_034949.1	98647	100137	+	rrn16	--	--	--	--	--	--	--	--
gene-CDC77_pgt004	11.71	8.54	5.06	0.61	1.17	0	21	15	8	1	2	0	18.628	4.219	0.000293647	0.0038402	up	NC_034949.1	7750	7837	-	trnS-GCU	--	--	--	--	--	--	--	--
gene-CDC77_pgt016	14.33	10.7	51.32	3.02	1.16	3.48	26	19	82	5	2	6	12.235	3.613	1.58627e-05	0.000344093	up	NC_034949.1	47057	47705	+	trnL-UAA	--	--	--	--	--	--	--	--
gene-CDC77_pgt018	3.36	1.37	17.55	0	0	0.71	5	2	23	0	0	1	36.095	5.174	0.003049	0.0240559	up	NC_034949.1	55267	55339	-	trnM-CAU	--	--	--	--	--	--	--	--
gene-CDC77_pgt019	11.27	1.35	15.81	0.73	0	0	17	2	21	1	0	0	48.495	5.6	0.00065632	0.00731218	up	NC_034949.1	55512	56177	+	trnV-UAC	--	--	--	--	--	--	--	--
gene-CDC77_pgt033	4.77	5.57	3.87	0	0	0	7	8	5	0	0	0	44.634	5.48	0.00108298	0.0108458	up	NC_034949.1	134210	135252	-	trnI-GAU	--	--	--	--	--	--	--	--
gene-LOC110681589	0.79	0.21	0.69	2.26	2.78	2.07	35	9	27	91	117	87	0.311	-1.685	0.00145101	0.0136368	down	NW_018743555.1	3500611	3506884	-	LOC110681589	--	--	uncharacterized protein LOC110681589 [Chenopodium quinoa]	--	SubName: Full=uncharacterized protein LOC104230689 isoform X1 {ECO:0000313|RefSeq:XP_009781855.1};	--	--	Plant transposase (Ptta/En/Spm family)
gene-LOC110681594	4.01	5.27	3.55	10.74	15.26	11.72	118	152	92	289	429	328	0.429	-1.221	2.38697e-07	8.88138e-06	down	NW_018743555.1	3567815	3576255	+	LOC110681594	--	K15892 farnesol kinase [EC:2.7.1.216] | (RefSeq) farnesol kinase, chloroplastic-like (A)	farnesol kinase, chloroplastic-like [Chenopodium quinoa]	RecName: Full=Farnesol kinase, chloroplastic {ECO:0000303|PubMed:21395888}; EC=2.7.1.216 {ECO:0000305}; Flags: Precursor;	SubName: Full=Uncharacterized protein {ECO:0000313|EMBL:KNA24311.1};	Predicted ER membrane protein	GO:0031969,chloroplast membrane; GO:0016021,integral component of membrane; GO:0052669,CTP:2-trans,-6-trans-farnesol kinase activity; GO:0052668,farnesol kinase activity; GO:0052670,geraniol kinase activity; GO:0052671,geranylgeraniol kinase activity; GO:0016301,kinase activity; GO:0048440,carpel development; GO:0016487,farnesol metabolic process; GO:0006720,isoprenoid metabolic process; GO:00097…	--
gene-LOC110681597	0	0.22	0.21	0.85	3.24	0.87	0	9	8	33	131	35	0.108	-3.204	0.000249656	0.00337022	down	NW_018742244.1	2712531	2716071	-	LOC110681597	--	K21374 7-deoxyloganetin glucosyltransferase [EC:2.4.1.324] | (RefSeq) UDP-glycosyltransferase 85A2-like (A)	7-deoxyloganetin glucosyltransferase-like [Chenopodium quinoa]	RecName: Full=7-deoxyloganetin glucosyltransferase; EC=2.4.1.324; AltName: Full=Iridoid 1-O-glucosyltransferase; AltName: Full=UDP-glucose glucosyltransferase 6; Short=CrUGT6; AltName: Full=UDP-glycosyltransferase 85A23;	RecName: Full=Glycosyltransferase {ECO:0000256|RuleBase:RU362057}; EC=2.4.1.- {ECO:0000256|RuleBase:RU362057};	UDP-glucuronosyl and UDP-glucosyl transferase	GO:0035251,UDP-glucosyltransferase activity; GO:1900994,(-)-secologanin biosynthetic process	UDP-glucoronosyl and UDP-glucosyl transferase
gene-LOC110681619	6.34	3.59	9.97	1.12	3.47	0.98	130	72	180	21	68	19	4.71	2.236	8.68093e-05	0.00142873	up	NW_018742244.1	2710033	2711038	-	LOC110681619	--	K13993 HSP20 family protein | (RefSeq) uncharacterized protein LOC110681619 (A)	uncharacterized protein LOC110681619 [Chenopodium quinoa]	RecName: Full=14.7 kDa heat shock protein; Short=AtHsp14.7;	SubName: Full=Uncharacterized protein {ECO:0000313|EMBL:CDP09952.1};	--	GO:0005737,cytoplasm	Hsp20/alpha crystallin family
gene-LOC110681629	0	0	0	0.66	0.37	0.37	0	0	0	12	7	7	0.026	-5.265	0.00157264	0.0145127	down	NW_018742244.1	2725385	2726510	+	LOC110681629	--	--	--	--	--	--	--	--
gene-LOC110681673	111.38	109.03	101.38	58.61	47.69	51.46	5189	4974	4161	2494	2121	2278	2.563	1.358	1.59635e-10	1.14119e-08	up	NW_018742244.1	2770991	2775852	+	LOC110681673	--	K01626 3-deoxy-7-phosphoheptulonate synthase [EC:2.5.1.54] | (RefSeq) phospho-2-dehydro-3-deoxyheptonate aldolase 2, chloroplastic-like (A)	phospho-2-dehydro-3-deoxyheptonate aldolase 2, chloroplastic-like [Chenopodium quinoa]	RecName: Full=Phospho-2-dehydro-3-deoxyheptonate aldolase 2, chloroplastic; EC=2.5.1.54; AltName: Full=3-deoxy-D-arabino-heptulosonate 7-phosphate synthase 2; AltName: Full=DAHP synthase 2; AltName: Full=Phospho-2-keto-3-deoxyheptonate aldolase 2; Flags: Precursor;	RecName: Full=Phospho-2-dehydro-3-deoxyheptonate aldolase {ECO:0000256|RuleBase:RU363071}; EC=2.5.1.54 {ECO:0000256|RuleBase:RU363071};	--	GO:0009507,chloroplast; GO:0009534,chloroplast thylakoid; GO:0003849,3-deoxy-7-phosphoheptulonate synthase activity; GO:0009073,aromatic amino acid family biosynthetic process; GO:0009423,chorismate biosynthetic process	Class-II DAHP synthetase family
gene-LOC110681692	6.4	11.67	4.95	0.09	0.13	0.04	154	275	105	2	3	1	108.187	6.757	3.70049e-21	1.19848e-18	up	NW_018742244.1	2783509	2785966	-	LOC110681692	--	K17744 L-galactose dehydrogenase [EC:1.1.1.316] | (RefSeq) L-galactose dehydrogenase-like (A)	L-galactose dehydrogenase-like [Chenopodium quinoa]	RecName: Full=L-galactose dehydrogenase; Short=At-GalDH; Short=L-GalDH; EC=1.1.1.316;	SubName: Full=Uncharacterized protein {ECO:0000313|EMBL:KNA10025.1};	Predicted oxidoreductase	GO:0005829,cytosol; GO:0010349,L-galactose dehydrogenase activity; GO:0006012,galactose metabolic process; GO:0019853,L-ascorbic acid biosynthetic process	Aldo/keto reductase family
gene-LOC110681696	0	0	0.11	0.47	0.76	0.35	0	0	3	13	22	10	0.086	-3.536	0.00515473	0.0356169	down	NW_018743574.1	3701064	3716054	+	LOC110681696	--	K14432 ABA responsive element binding factor | (RefSeq) ABSCISIC ACID-INSENSITIVE 5-like protein 2 (A)	protein FD-like [Chenopodium quinoa]	RecName: Full=Protein FD {ECO:0000303|PubMed:16099980}; AltName: Full=bZIP transcription factor 14 {ECO:0000303|PubMed:11906833}; Short=AtbZIP14 {ECO:0000303|PubMed:11906833};	SubName: Full=Uncharacterized protein {ECO:0000313|EMBL:KNA16704.1};	--	GO:0005634,nucleus; GO:0003677,DNA binding; GO:0003700,DNA-binding transcription factor activity; GO:0043621,protein self-association; GO:0009648,photoperiodism; GO:0009911,positive regulation of flower development; GO:0045893,positive regulation of transcription, DNA-templated; GO:0009909,regulation of flower development; GO:2000028,regulation of photoperiodism, flowering; GO:0006355,regulation …	bZIP transcription factor
gene-LOC110681722	0	0.11	0	0.86	0.95	0.63	0	5	0	38	44	29	0.054	-4.218	9.54887e-06	0.000224242	down	NW_018743574.1	7821714	7824306	+	LOC110681722	--	K01762 1-aminocyclopropane-1-carboxylate synthase [EC:4.4.1.14] | (RefSeq) 1-aminocyclopropane-1-carboxylate synthase 9-like (A)	1-aminocyclopropane-1-carboxylate synthase 9-like [Chenopodium quinoa]	RecName: Full=1-aminocyclopropane-1-carboxylate synthase 8; Short=ACC synthase 8; EC=4.4.1.14; AltName: Full=S-adenosyl-L-methionine methylthioadenosine-lyase 8;	SubName: Full=Uncharacterized protein {ECO:0000313|EMBL:CAN74730.1};	1-aminocyclopropane-1-carboxylate synthase, and related proteins	GO:0016847,1-aminocyclopropane-1-carboxylate synthase activity; GO:0042802,identical protein binding; GO:0030170,pyridoxal phosphate binding; GO:0009693,ethylene biosynthetic process; GO:0009835,fruit ripening	Aminotransferase class I and II
gene-LOC110681724	15.19	27.82	17.28	0.15	0.15	0.62	545	977	546	5	5	21	79.428	6.312	6.93335e-36	7.82523e-33	up	NW_018743574.1	8205098	8208856	-	LOC110681724	--	K13422 transcription factor MYC2 | (RefSeq) transcription factor MYC3 (A)	transcription factor bHLH18-like [Chenopodium quinoa]	RecName: Full=Transcription factor NAI1; AltName: Full=Basic helix-loop-helix protein 20; Short=AtbHLH20; Short=bHLH 20; AltName: Full=Transcription factor EN 27; AltName: Full=bHLH transcription factor bHLH020;	SubName: Full=Uncharacterized protein {ECO:0000313|EMBL:KMS95692.1};	--	GO:0005634,nucleus; GO:0003677,DNA binding; GO:0003700,DNA-binding transcription factor activity; GO:0046983,protein dimerization activity; GO:0007029,endoplasmic reticulum organization; GO:0006355,regulation of transcription, DNA-templated; GO:0006351,transcription, DNA-templated	Helix-loop-helix DNA-binding domain
gene-LOC110681738	0.32	0.58	0.65	1.62	1.94	1.8	35	63	63	163	204	189	0.357	-1.485	6.81813e-07	2.25726e-05	down	NW_018743574.1	913577	924422	-	LOC110681738	--	--	--	--	--	--	--	--
gene-LOC110681741	0.23	0.34	0.02	0.84	1.33	0.88	14	20	1	46	76	50	0.249	-2.008	0.0050485	0.0351264	down	NW_018742244.1	2818981	2822570	+	LOC110681741	--	K10738 DNA helicase MCM9 [EC:3.6.4.12] | (RefSeq) probable DNA helicase MCM9 (A)	probable DNA helicase MCM9 [Chenopodium quinoa]	RecName: Full=Probable DNA helicase MCM9; EC=3.6.4.12; AltName: Full=Minichromosome maintenance 9; Short=AtMCM9;	SubName: Full=Uncharacterized protein {ECO:0000313|EMBL:KNA22946.1};	DNA replication licensing factor, MCM2 component	GO:0005634,nucleus; GO:0005524,ATP binding; GO:0003677,DNA binding; GO:0004386,helicase activity; GO:0046872,metal ion binding; GO:0006281,DNA repair; GO:0006270,DNA replication initiation; GO:0051321,meiotic cell cycle	MCM P-loop domain
gene-LOC110681758	1.76	3.68	1.97	9.68	9.58	9.65	65	133	64	326	337	338	0.316	-1.662	1.92122e-08	9.18561e-07	down	NW_018743574.1	1571181	1573212	-	LOC110681758	--	K15255 ATP-dependent DNA helicase PIF1 [EC:3.6.4.12] | (RefSeq) uncharacterized protein LOC110681758 (A)	uncharacterized protein LOC110681758 [Chenopodium quinoa]	--	RecName: Full=ATP-dependent DNA helicase {ECO:0000256|RuleBase:RU363044}; EC=3.6.4.12 {ECO:0000256|RuleBase:RU363044};	DNA helicase PIF1/RRM3	GO:0005524,ATP binding; GO:0003678,DNA helicase activity; GO:0006310,DNA recombination; GO:0006281,DNA repair; GO:0000723,telomere maintenance	PIF1-like helicase
gene-LOC110681813	0.41	0.5	0.21	5.44	8.3	3.08	16	19	7	192	306	113	0.086	-3.533	1.04669e-13	1.23758e-11	down	NW_018743574.1	399081	402078	-	LOC110681813	--	K15400 omega-hydroxypalmitate O-feruloyl transferase [EC:2.3.1.188] | (RefSeq) omega-hydroxypalmitate O-feruloyl transferase-like (A)	omega-hydroxypalmitate O-feruloyl transferase-like [Chenopodium quinoa]	RecName: Full=Omega-hydroxypalmitate O-feruloyl transferase; EC=2.3.1.188; AltName: Full=Omega-hydroxyacid hydroxycinnamoyltransferase; AltName: Full=Protein ALIPHATIC SUBERIN FERULOYL TRANSFERASE;	SubName: Full=Uncharacterized protein {ECO:0000313|EMBL:KNA03819.1};	--	GO:0050734,hydroxycinnamoyltransferase activity; GO:0102406,omega-hydroxypalmitate O-sinapoyl transferase activity; GO:0052325,cell wall pectin biosynthetic process; GO:0010345,suberin biosynthetic process	Transferase family
gene-LOC110681817	0.62	0.61	0.47	1.7	3.6	0.87	24	23	16	60	133	32	0.361	-1.471	0.00783759	0.048281	down	NW_018743574.1	444110	448239	-	LOC110681817	--	K00688 glycogen phosphorylase [EC:2.4.1.1] | (RefSeq) glycogen phosphorylase 1-like isoform X1 (A)	ACT domain-containing protein ACR6-like [Chenopodium quinoa]	RecName: Full=ACT domain-containing protein ACR6 {ECO:0000305}; AltName: Full=Protein ACT DOMAIN REPEATS 6 {ECO:0000303|PubMed:12481063};	SubName: Full=Uncharacterized protein {ECO:0000313|EMBL:KNA14680.1}; Flags: Fragment;	--	GO:0016597,amino acid binding	ACT domain
gene-LOC110681826	0.24	0.45	0.43	1.75	3.14	1.12	11	20	17	72	135	48	0.238	-2.072	2.19525e-05	0.000453226	down	NW_018743574.1	548053	551264	+	LOC110681826	--	K13415 protein brassinosteroid insensitive 1 [EC:2.7.10.1 2.7.11.1] | (RefSeq) uncharacterized protein LOC103413440 isoform X1 (A)	squamosa promoter-binding-like protein 16 isoform X1 [Chenopodium quinoa]	RecName: Full=Squamosa promoter-binding-like protein 13B;	SubName: Full=Uncharacterized protein {ECO:0000313|EMBL:KNA04180.1};	--	GO:0005634,nucleus; GO:0003677,DNA binding; GO:0046872,metal ion binding; GO:0048653,anther development; GO:0006355,regulation of transcription, DNA-templated; GO:0006351,transcription, DNA-templated	SBP domain
gene-LOC110681832	1.84	0.05	0.89	0	0	0	75	2	32	0	0	0	260.701	8.026	1.85631e-06	5.4079e-05	up	NW_018743574.1	647052	655910	+	LOC110681832	--	K03301 ATP:ADP antiporter, AAA family | (RefSeq) uncharacterized protein LOC110681832 (A)	uncharacterized protein LOC110681832 [Chenopodium quinoa]	--	RecName: Full=ADP,ATP carrier protein {ECO:0000256|RuleBase:RU363121};	--	GO:0031969,chloroplast membrane; GO:0016021,integral component of membrane; GO:0005524,ATP binding; GO:0005471,ATP:ADP antiporter activity	TLC ATP/ADP transporter
gene-LOC110681846	18.87	17.78	20.41	10.01	9.4	9.21	997	920	950	483	474	462	2.513	1.33	2.11429e-11	1.81863e-09	up	NW_018743574.1	807858	812023	-	LOC110681846	--	--	protein NUCLEAR FUSION DEFECTIVE 4-like isoform X1 [Chenopodium quinoa]	RecName: Full=Protein NUCLEAR FUSION DEFECTIVE 4 {ECO:0000303|PubMed:16698901};	SubName: Full=Uncharacterized protein {ECO:0000313|EMBL:KNA03865.1};	--	GO:0016021,integral component of membrane; GO:0000741,karyogamy; GO:0010197,polar nucleus fusion; GO:0009651,response to salt stress	Nodulin-like
gene-LOC110681850	11.6	12.29	9.68	3.45	5.48	8.75	162	168	119	44	73	116	2.368	1.244	0.0022824	0.0192195	up	NW_018743574.1	825050	825734	+	LOC110681850	--	K11094 U2 small nuclear ribonucleoprotein B'' | (RefSeq) U2 small nuclear ribonucleoprotein B''-like isoform X1 (A)	uncharacterized protein LOC110681850 [Chenopodium quinoa]	--	SubName: Full=Uncharacterized protein {ECO:0000313|EMBL:KNA06760.1};	--	GO:0016021,integral component of membrane	Protein of unknown function (DUF3339)
gene-LOC110681859	0.45	0.76	0.39	4.67	5.66	3.97	9	15	7	86	109	76	0.141	-2.825	3.06566e-11	2.54867e-09	down	NW_018743574.1	936459	940736	+	LOC110681859	--	--	--	--	--	--	--	--
gene-LOC110681862	0.31	0.34	0.46	2.43	3.88	1.07	12	13	16	87	145	40	0.193	-2.372	1.02165e-05	0.000236343	down	NW_018743574.1	986253	988257	-	LOC110681862	--	K17604 zinc finger SWIM domain-containing protein 3 | (RefSeq) protein FAR1-RELATED SEQUENCE 6-like (A)	protein FAR-RED IMPAIRED RESPONSE 1-like [Chenopodium quinoa]	RecName: Full=Protein FAR-RED ELONGATED HYPOCOTYL 3;	SubName: Full=Uncharacterized protein {ECO:0000313|EMBL:KNA16107.1}; Flags: Fragment;	--	GO:0005634,nucleus; GO:0003700,DNA-binding transcription factor activity; GO:0008270,zinc ion binding; GO:0007623,circadian rhythm; GO:0010018,far-red light signaling pathway; GO:0042753,positive regulation of circadian rhythm; GO:0045893,positive regulation of transcription, DNA-templated; GO:0010017,red or far-red light signaling pathway; GO:0009585,red, far-red light phototransduction; GO:0010…	SWIM zinc finger
gene-LOC110681889	0.4	0.85	0.54	0.1	0.14	0.04	21	44	25	5	7	2	7.908	2.983	7.5116e-06	0.000181905	up	NW_018743574.1	1306514	1314430	-	LOC110681889	--	--	--	--	--	--	--	--
gene-LOC110681903	0	0	0	0.23	0.11	0.2	0	0	0	10	5	9	0.028	-5.164	0.00249318	0.0205258	down	NW_018743574.1	1477005	1479450	-	LOC110681903	--	K11253 histone H3 | (RefSeq) uncharacterized protein LOC110788621 (A)	uncharacterized protein LOC110681903 isoform X1 [Chenopodium quinoa]	--	SubName: Full=Uncharacterized protein {ECO:0000313|EnsemblPlants:HORVU1Hr1G076580.1};	--	GO:0008270,zinc ion binding	SWIM zinc finger
gene-LOC110681915	1.13	1.66	1.62	4.08	2.74	4.64	88	126	111	289	203	342	0.472	-1.084	0.000897142	0.00933093	down	NW_018743574.1	1573015	1580528	-	LOC110681915	--	K15255 ATP-dependent DNA helicase PIF1 [EC:3.6.4.12] | (RefSeq) uncharacterized protein LOC101786894 (A)	uncharacterized protein LOC110681915 isoform X1 [Chenopodium quinoa]	--	SubName: Full=uncharacterized protein LOC108984871 {ECO:0000313|RefSeq:XP_018812501.1};	DNA helicase PIF1/RRM3	--	Helitron helicase-like domain at N-terminus
gene-LOC110681917	2.07	3.19	2.21	6.4	5.26	7.19	128	193	120	361	310	422	0.488	-1.035	0.000182511	0.00260645	down	NW_018743574.1	1566390	1571220	-	LOC110681917	--	K07466 replication factor A1 | (RefSeq) replication protein A 70 kDa DNA-binding subunit B-like (A)	replication protein A 70 kDa DNA-binding subunit D-like isoform X1 [Chenopodium quinoa]	RecName: Full=Replication protein A 70 kDa DNA-binding subunit B; Short=AtRPA70B; AltName: Full=AtRPA1-5; AltName: Full=Replication factor A protein 1B; AltName: Full=Replication protein A 1B; Short=AtRPA1B;	SubName: Full=Uncharacterized protein {ECO:0000313|EMBL:KNA05758.1}; Flags: Fragment;	Single-stranded DNA-binding replication protein A (RPA), large (70 kD) subunit and related ssDNA-binding proteins	GO:0005634,nucleus; GO:0003677,DNA binding; GO:0046872,metal ion binding; GO:0006310,DNA recombination; GO:0006281,DNA repair; GO:0006260,DNA replication; GO:0010224,response to UV-B	Replication protein A OB domain
gene-LOC110681929	3.27	11.09	18.9	33.55	92.2	27.28	92	306	469	863	2479	730	0.275	-1.863	0.00113618	0.0112455	down	NW_018743574.1	1699548	1700929	-	LOC110681929	--	K10808 ribonucleoside-diphosphate reductase subunit M2 [EC:1.17.4.1] | (RefSeq) ribonucleoside-diphosphate reductase small chain-like (A)	ribonucleoside-diphosphate reductase small chain-like [Chenopodium quinoa]	RecName: Full=Ribonucleoside-diphosphate reductase small chain; EC=1.17.4.1; AltName: Full=Ribonucleoside-diphosphate reductase R2 subunit; AltName: Full=Ribonucleotide reductase small subunit;	SubName: Full=Uncharacterized protein {ECO:0000313|EMBL:KNA15253.1};	Ribonucleotide reductase, beta subunit	GO:0005737,cytoplasm; GO:0046872,metal ion binding; GO:0004748,ribonucleoside-diphosphate reductase activity, thioredoxin disulfide as acceptor; GO:0009263,deoxyribonucleotide biosynthetic process; GO:0006260,DNA replication	Ribonucleotide reductase, small chain
gene-LOC110681932	0.09	0.73	0.23	1.59	4.48	0.87	3	25	7	51	150	29	0.188	-2.415	0.00223196	0.0189317	down	NW_018743574.1	1712355	1717332	+	LOC110681932	--	K16903 L-tryptophan---pyruvate aminotransferase [EC:2.6.1.99] | (RefSeq) tryptophan aminotransferase-related protein 1-like isoform X1 (A)	tryptophan aminotransferase-related protein 1-like isoform X1 [Chenopodium quinoa]	RecName: Full=L-tryptophan--pyruvate aminotransferase 1; EC=2.6.1.27; EC=2.6.1.99; AltName: Full=Protein CYTOKININ INDUCED ROOT CURLING 1; AltName: Full=Protein SHADE AVOIDANCE 3; AltName: Full=Protein TRANSPORT INHIBITOR RESPONSE 2; AltName: Full=Protein TRYPTOPHAN AMINOTRANSFERASE OF ARABIDOPSIS 1; AltName: Full=Protein WEAK ETHYLENE INSENSITIVE 8; AltName: Full=Tryptophan transaminase;	SubName: Full=Uncharacterized protein {ECO:0000313|EMBL:KNA12003.1};	--	GO:0005737,cytoplasm; GO:0016846,carbon-sulfur lyase activity; GO:0004021,L-alanine:2-oxoglutarate aminotransferase activity; GO:0080100,L-glutamine:2-oxoglutarate aminotransferase activity; GO:0050048,L-leucine:2-oxoglutarate aminotransferase activity; GO:0080099,L-methionine:2-oxoglutarate aminotransferase activity; GO:0080130,L-phenylalanine:2-oxoglutarate aminotransferase activity; GO:0047312…	Allinase
gene-LOC110681944	2.09	1.99	1.99	0.41	0.39	0.27	89	83	75	16	16	11	7.168	2.842	2.54557e-13	2.86435e-11	up	NW_018743574.1	1808606	1813071	-	LOC110681944	--	K16871 4-aminobutyrate---pyruvate transaminase [EC:2.6.1.96] | (RefSeq) gamma aminobutyrate transaminase 3, chloroplastic-like (A)	gamma aminobutyrate transaminase 3, chloroplastic-like [Chenopodium quinoa]	RecName: Full=Gamma aminobutyrate transaminase 3, chloroplastic; AltName: Full=Gamma-aminobutyrate transaminase isozyme 3; Short=LeGABA-TP3; Short=SlGABA-T3; EC=2.6.1.96; Flags: Precursor;	SubName: Full=Uncharacterized protein {ECO:0000313|EMBL:KNA24573.1};	Alanine-glyoxylate aminotransferase AGT2	GO:0009507,chloroplast; GO:0034387,4-aminobutyrate:pyruvate transaminase activity; GO:0102351,gamma-aminobutyrate transaminase (glyoxylate dependent) activity; GO:0030170,pyridoxal phosphate binding	Aminotransferase class-III
gene-LOC110681958	0.71	2.3	1.1	10.03	23.37	10.24	25	79	34	321	782	341	0.118	-3.082	5.0129e-12	4.72672e-10	down	NW_018743574.1	1973402	1975154	+	LOC110681958	--	--	36.4 kDa proline-rich protein-like [Chenopodium quinoa]	RecName: Full=36.4 kDa proline-rich protein;	SubName: Full=Uncharacterized protein {ECO:0000313|EMBL:CAN77497.1};	--	--	Hydrophobic seed protein
gene-LOC110681978	0.85	1.62	0.96	3.1	3.5	2.26	30	56	30	100	118	76	0.484	-1.047	0.00262705	0.0214289	down	NW_018743574.1	2185119	2191488	+	LOC110681978	--	K15356 GDP-mannose transporter | (RefSeq) GDP-mannose transporter GONST1-like isoform X1 (A)	GDP-mannose transporter GONST1-like isoform X1 [Chenopodium quinoa]	RecName: Full=GDP-mannose transporter GONST1 {ECO:0000303|PubMed:11595802}; AltName: Full=Protein GOLGI NUCLEOTIDE SUGAR TRANSPORTER 1 {ECO:0000303|PubMed:11595802};	SubName: Full=Uncharacterized protein {ECO:0000313|EMBL:KNA15197.1};	Nucleotide-sugar transporter VRG4/SQV-7	GO:0005794,Golgi apparatus; GO:0000139,Golgi membrane; GO:0016021,integral component of membrane; GO:0015297,antiporter activity; GO:0005457,GDP-fucose transmembrane transporter activity; GO:0005458,GDP-mannose transmembrane transporter activity; GO:0005338,nucleotide-sugar transmembrane transporter activity; GO:0008643,carbohydrate transport; GO:0015783,GDP-fucose transmembrane transport; GO:199…	Triose-phosphate Transporter family
gene-LOC110681986	0.45	1	0.63	1.64	1.81	2.04	51	111	63	170	196	219	0.465	-1.105	0.000516517	0.00603062	down	NW_018743574.1	2272534	2278824	-	LOC110681986	--	--	cation/H(+) antiporter 15-like [Chenopodium quinoa]	RecName: Full=Cation/H(+) antiporter 15; AltName: Full=Protein CATION/H+ EXCHANGER 15; Short=AtCHX15;	SubName: Full=Uncharacterized protein {ECO:0000313|EMBL:KNA15007.1};	Predicted K+/H+-antiporter	GO:0012505,endomembrane system; GO:0016021,integral component of membrane; GO:0015299,solute:proton antiporter activity; GO:0015672,monovalent inorganic cation transport; GO:0006813,potassium ion transport; GO:0006885,regulation of pH	Sodium/hydrogen exchanger family
gene-LOC110682009	0.03	0.03	0	2.69	3.02	0	1	1	0	86	101	0	0.014	-6.206	0.000179913	0.0025723	down	NW_018743574.1	2457301	2459115	+	LOC110682009	--	K11866 STAM-binding protein [EC:3.4.19.12] | (RefSeq) probable ubiquitin thioesterase DG1039 (A)	zinc finger BED domain-containing protein RICESLEEPER 1-like [Chenopodium quinoa]	RecName: Full=Zinc finger BED domain-containing protein RICESLEEPER 2; AltName: Full=Transposase-like protein RICESLEEPER 2;	SubName: Full=Uncharacterized protein {ECO:0000313|EMBL:KMS98900.1};	Tam3-transposase (Ac family)	GO:0005634,nucleus; GO:0003700,DNA-binding transcription factor activity; GO:0046872,metal ion binding; GO:0046983,protein dimerization activity; GO:0000977,RNA polymerase II regulatory region sequence-specific DNA binding; GO:0009791,post-embryonic development; GO:0006357,regulation of transcription by RNA polymerase II; GO:0006351,transcription, DNA-templated	hAT family C-terminal dimerisation region
gene-LOC110682010	0.27	1.31	0.88	3.32	6.77	2.91	12	56	34	133	283	121	0.235	-2.092	4.5645e-05	0.000839531	down	NW_018743574.1	2474737	2479729	+	LOC110682010	--	K10751 chromatin assembly factor 1 subunit B | (RefSeq) chromatin assembly factor 1 subunit FAS2-like (A)	chromatin assembly factor 1 subunit FAS2-like [Chenopodium quinoa]	RecName: Full=Chromatin assembly factor 1 subunit FAS2; Short=CAF-1 subunit FAS2; AltName: Full=CAF-1 p60 homolog; AltName: Full=Protein FASCIATA 2;	SubName: Full=Uncharacterized protein {ECO:0000313|EMBL:KNA08086.1};	Chromatin assembly complex 1 subunit B/CAC2 (contains WD40 repeats)	GO:0033186,CAF-1 complex; GO:0005634,nucleus; GO:0042393,histone binding; GO:0008283,cell proliferation; GO:0016569,covalent chromatin modification; GO:0006310,DNA recombination; GO:0000724,double-strand break repair via homologous recombination; GO:0031507,heterochromatin assembly; GO:0048366,leaf development; GO:0009933,meristem structural organization; GO:0006334,nucleosome assembly; GO:000955…	WD domain, G-beta repeat
gene-LOC110682022	0.21	0.18	0.22	0.46	0.61	1.52	12	10	11	24	33	82	0.291	-1.782	0.00660432	0.0427713	down	NW_018743574.1	2638537	2642201	-	LOC110682022	--	K20241 WD repeat-containing protein 44 | (RefSeq) WD repeat-containing protein 44-like (A)	WD repeat-containing protein 44-like [Chenopodium quinoa]	RecName: Full=COMPASS-like H3K4 histone methylase component WDR5A {ECO:0000303|PubMed:19567704}; Short=AtWDR5A {ECO:0000303|PubMed:19567704};	SubName: Full=Uncharacterized protein {ECO:0000313|EMBL:KNA03239.1}; Flags: Fragment;	WD40 repeat-containing protein	GO:0005634,nucleus; GO:0048188,Set1C/COMPASS complex; GO:0042393,histone binding; GO:0008168,methyltransferase activity; GO:0010228,vegetative to reproductive phase transition of meristem	WD domain, G-beta repeat
gene-LOC110682024	0.38	0.95	0.92	1.53	4.14	1.83	36	87	76	131	370	163	0.379	-1.401	0.00164815	0.0150013	down	NW_018743574.1	2671191	2683546	-	LOC110682024	--	K22614 NLR family CARD domain-containing protein 3 | (RefSeq) protein NLRC3 (A)	protein TONSOKU-like [Chenopodium quinoa]	RecName: Full=Protein TONSOKU; AltName: Full=Protein BRUSHY 1; AltName: Full=Protein MGOUN 3;	SubName: Full=Uncharacterized protein {ECO:0000313|EMBL:KNA11274.1};	FOG: TPR repeat	GO:0016020,membrane; GO:0005654,nucleoplasm; GO:0005634,nucleus; GO:0051301,cell division; GO:0016569,covalent chromatin modification; GO:0000086,G2/M transition of mitotic cell cycle; GO:0009933,meristem structural organization; GO:0009934,regulation of meristem structural organization	Tetratricopeptide repeat
gene-LOC110682029	3.24	2.29	1.62	1.01	0.93	0.97	91	63	40	26	25	26	3.137	1.649	0.000290335	0.00380794	up	NW_018743574.1	2707671	2709048	+	LOC110682029	--	K19040 E3 ubiquitin-protein ligase ATL10/75/76/77/78 [EC:2.3.2.27] | (RefSeq) RING-H2 finger protein ATL78-like (A)	RING-H2 finger protein ATL78-like [Chenopodium quinoa]	RecName: Full=RING-H2 finger protein ATL78; EC=2.3.2.27 {ECO:0000305}; AltName: Full=RING-type E3 ubiquitin transferase ATL78 {ECO:0000305};	SubName: Full=Uncharacterized protein {ECO:0000313|EMBL:KNA25175.1};	FOG: Predicted E3 ubiquitin ligase	GO:0016021,integral component of membrane; GO:0046872,metal ion binding; GO:0061630,ubiquitin protein ligase activity; GO:0043161,proteasome-mediated ubiquitin-dependent protein catabolic process	Ring finger domain
gene-LOC110682038	2.93	2.5	1.48	29	26.13	21.79	36	30	16	325	306	254	0.115	-3.125	9.5414e-20	2.35344e-17	down	NW_018743574.1	2842172	2844145	+	LOC110682038	--	K22075 BolA-like protein 3 | (RefSeq) protein BOLA2 (A)	protein BOLA2-like [Chenopodium quinoa]	RecName: Full=Protein BOLA2 {ECO:0000303|PubMed:24203231};	SubName: Full=Uncharacterized protein {ECO:0000313|EMBL:EXB76036.1};	BolA (bacterial stress-induced morphogen)-related protein	GO:0005737,cytoplasm; GO:0005829,cytosol; GO:0005634,nucleus; GO:0010039,response to iron ion; GO:0006979,response to oxidative stress	BolA-like protein
gene-LOC110682045	0.56	0.55	0.2	1.51	1.28	2.29	22	21	7	54	48	85	0.324	-1.626	0.00336009	0.0258973	down	NW_018743574.1	2897770	2910489	-	LOC110682045	--	K17500 integrin-linked kinase-associated serine/threonine phosphatase 2C [EC:3.1.3.16] | (RefSeq) WAT1-related protein At3g18200 isoform X1 (A)	WAT1-related protein At5g64700-like [Chenopodium quinoa]	RecName: Full=WAT1-related protein At5g64700;	RecName: Full=WAT1-related protein {ECO:0000256|RuleBase:RU363077};	--	GO:0016021,integral component of membrane; GO:0005886,plasma membrane; GO:0022857,transmembrane transporter activity	EamA-like transporter family
gene-LOC110682052	2.93	10.15	11.68	32.51	78.65	29.09	195	662	685	1977	4999	1840	0.221	-2.176	6.54118e-06	0.000162201	down	NW_018743574.1	2957654	2962734	-	LOC110682052	--	K10807 ribonucleoside-diphosphate reductase subunit M1 [EC:1.17.4.1] | (RefSeq) ribonucleoside-diphosphate reductase large subunit-like (A)	ribonucleoside-diphosphate reductase large subunit-like [Chenopodium quinoa]	RecName: Full=Ribonucleoside-diphosphate reductase large subunit {ECO:0000303|PubMed:10542051}; EC=1.17.4.1; AltName: Full=Protein DEFECTIVE IN POLLEN DNA DEGRADATION 2 {ECO:0000303|PubMed:22239102}; AltName: Full=Ribonucleoside-diphosphate reductase R1 subunit {ECO:0000303|PubMed:10542051}; Short=AtRNR1;	RecName: Full=Ribonucleoside-diphosphate reductase {ECO:0000256|RuleBase:RU003410}; EC=1.17.4.1 {ECO:0000256|RuleBase:RU003410};	Ribonucleotide reductase, alpha subunit	GO:0005737,cytoplasm; GO:0005524,ATP binding; GO:0004748,ribonucleoside-diphosphate reductase activity, thioredoxin disulfide as acceptor; GO:0009202,deoxyribonucleoside triphosphate biosynthetic process; GO:0009263,deoxyribonucleotide biosynthetic process; GO:0006260,DNA replication; GO:0046686,response to cadmium ion	Ribonucleotide reductase, barrel domain
gene-LOC110682063	0.12	0.28	0.18	0.73	1.92	1.09	8	19	11	46	127	72	0.194	-2.368	4.78929e-06	0.000124132	down	NW_018743574.1	3067735	3073540	-	LOC110682063	--	--	TSL-kinase interacting protein 1-like [Chenopodium quinoa]	RecName: Full=TSL-kinase interacting protein 1; AltName: Full=Myb-related protein TKI1;	SubName: Full=Uncharacterized protein {ECO:0000313|EMBL:KNA23491.1};	--	GO:0005634,nucleus; GO:0003682,chromatin binding; GO:0003677,DNA binding; GO:0006355,regulation of transcription, DNA-templated; GO:0006351,transcription, DNA-templated	--
gene-LOC110682079	0.28	0.83	0.57	1.97	4.24	1	15	44	27	97	218	51	0.296	-1.758	0.00174154	0.0156246	down	NW_018743574.1	3337925	3340884	-	LOC110682079	--	K20478 golgin subfamily B member 1 | (RefSeq) myosin-10-like isoform X1 (A)	uncharacterized protein At4g38062-like [Chenopodium quinoa]	RecName: Full=Uncharacterized protein At4g38062;	SubName: Full=Uncharacterized protein {ECO:0000313|EMBL:KNA14996.1};	--	--	--
gene-LOC110682086	0.93	1.28	0.56	2.31	3.56	2.06	61	82	32	138	222	128	0.445	-1.169	0.00166841	0.0151561	down	NW_018743574.1	3364964	3371431	-	LOC110682086	--	--	protein ecdysoneless homolog [Chenopodium quinoa]	RecName: Full=Protein ecdysoneless homolog {ECO:0000250|UniProtKB:Q9W032};	SubName: Full=Uncharacterized protein {ECO:0000313|EMBL:KNA14280.1};	MADS box transcription factor	GO:0005634,nucleus; GO:0003713,transcription coactivator activity; GO:0006366,transcription by RNA polymerase II	SGT1 protein
gene-LOC110682087	3.24	2.58	2.75	1.62	1.13	2.03	284	222	213	130	95	169	2.243	1.166	0.000906645	0.00940414	up	NW_018743574.1	3380689	3385553	-	LOC110682087	--	K05894 12-oxophytodienoic acid reductase [EC:1.3.1.42] | (RefSeq) artemisinic aldehyde Delta(11(13)) reductase-like isoform X1 (A)	artemisinic aldehyde Delta(11(13)) reductase-like isoform X1 [Chenopodium quinoa]	RecName: Full=12-oxophytodienoate reductase 3; EC=1.3.1.42; AltName: Full=12-oxophytodienoate-10,11-reductase 3; Short=AtOPR3; Short=OPDA-reductase 3; AltName: Full=Delayed dehiscence 1; Contains: RecName: Full=12-oxophytodienoate reductase 3, N-terminally processed;	SubName: Full=Uncharacterized protein {ECO:0000313|EMBL:KNA04621.1};	NADH:flavin oxidoreductase/12-oxophytodienoate reductase	GO:0005777,peroxisome; GO:0016629,12-oxophytodienoate reductase activity; GO:0010181,FMN binding; GO:0009695,jasmonic acid biosynthetic process; GO:0031408,oxylipin biosynthetic process; GO:0009620,response to fungus; GO:0010193,response to ozone; GO:0048443,stamen development	NADH:flavin oxidoreductase / NADH oxidase family
gene-LOC110682107	0.31	0.98	0.88	2.14	5.57	1.81	23	71	57	144	392	127	0.288	-1.797	0.000384142	0.00473441	down	NW_018743574.1	3562311	3568880	+	LOC110682107	--	K10406 kinesin family member C2/C3 | (RefSeq) kinesin-like protein KIN-14R (A)	kinesin-like protein KIN-14R [Chenopodium quinoa]	RecName: Full=Kinesin-like protein KIN-14R {ECO:0000305};	SubName: Full=Uncharacterized protein {ECO:0000313|EMBL:KNA13950.1};	Kinesin (KAR3 subfamily)	GO:0005871,kinesin complex; GO:0005874,microtubule; GO:0005524,ATP binding; GO:0016887,ATPase activity; GO:0008017,microtubule binding; GO:0003777,microtubule motor activity; GO:0007018,microtubule-based movement	Kinesin motor domain
gene-LOC110682112	0.72	0.6	0.45	2.7	5.09	1.94	22	18	12	75	148	56	0.238	-2.069	1.88189e-05	0.000398383	down	NW_018743574.1	3602133	3604663	-	LOC110682112	--	K00083 cinnamyl-alcohol dehydrogenase [EC:1.1.1.195] | (RefSeq) mannitol dehydrogenase-like (A)	probable mannitol dehydrogenase [Chenopodium quinoa]	RecName: Full=Probable mannitol dehydrogenase; EC=1.1.1.255; AltName: Full=NAD-dependent mannitol dehydrogenase;	SubName: Full=ADH_zinc_N domain-containing protein/ADH_N domain-containing protein {ECO:0000313|EMBL:GAV90004.1};	Alcohol dehydrogenase, class V	GO:0046029,mannitol dehydrogenase activity; GO:0008270,zinc ion binding	Alcohol dehydrogenase GroES-like domain
gene-LOC110682124	40.45	58.17	48.74	107.51	148.29	137.79	1900	2676	2017	4613	6650	6150	0.467	-1.098	1.69295e-09	9.94542e-08	down	NW_018742244.1	3120975	3124559	+	LOC110682124	--	K00021 hydroxymethylglutaryl-CoA reductase (NADPH) [EC:1.1.1.34] | (RefSeq) 3-hydroxy-3-methylglutaryl-coenzyme A reductase-like (A)	3-hydroxy-3-methylglutaryl-coenzyme A reductase-like [Chenopodium quinoa]	RecName: Full=3-hydroxy-3-methylglutaryl-coenzyme A reductase; Short=HMG-CoA reductase; EC=1.1.1.34;	RecName: Full=3-hydroxy-3-methylglutaryl coenzyme A reductase {ECO:0000256|RuleBase:RU361219}; Short=HMG-CoA reductase {ECO:0000256|RuleBase:RU361219}; EC=1.1.1.34 {ECO:0000256|RuleBase:RU361219};	3-hydroxy-3-methylglutaryl-CoA (HMG-CoA) reductase	GO:0005789,endoplasmic reticulum membrane; GO:0016021,integral component of membrane; GO:0004420,hydroxymethylglutaryl-CoA reductase (NADPH) activity; GO:0050661,NADP binding; GO:0015936,coenzyme A metabolic process; GO:0008299,isoprenoid biosynthetic process	Hydroxymethylglutaryl-coenzyme A reductase
gene-LOC110682130	2.8	7.51	5.83	15.51	25.78	11.32	125	328	229	632	1098	480	0.383	-1.385	0.000160757	0.00235169	down	NW_018743574.1	3856143	3859388	-	LOC110682130	--	K00108 choline dehydrogenase [EC:1.1.99.1] | (RefSeq) protein HOTHEAD (A)	protein HOTHEAD-like [Chenopodium quinoa]	RecName: Full=Protein HOTHEAD; AltName: Full=Protein ADHESION OF CALYX EDGES; Flags: Precursor;	SubName: Full=Uncharacterized protein {ECO:0000313|EMBL:KNA03049.1};	Glucose dehydrogenase/choline dehydrogenase/mandelonitrile lyase (GMC oxidoreductase family)	GO:0005576,extracellular region; GO:0050660,flavin adenine dinucleotide binding; GO:0046593,mandelonitrile lyase activity; GO:0016614,oxidoreductase activity, acting on CH-OH group of donors; GO:0007267,cell-cell signaling; GO:0009553,embryo sac development; GO:0010430,fatty acid omega-oxidation	GMC oxidoreductase
gene-LOC110682155	5.26	6.49	3.98	2.58	2.06	3.79	441	533	294	198	165	302	2.299	1.201	0.000561172	0.00646085	up	NW_018743574.1	4115653	4120549	-	LOC110682155	--	K05387 glutamate receptor, ionotropic, plant | (RefSeq) glutamate receptor 3.6-like (A)	glutamate receptor 3.6-like [Chenopodium quinoa]	RecName: Full=Glutamate receptor 3.6; AltName: Full=Ligand-gated ion channel 3.6; Flags: Precursor;	RecName: Full=Glutamate receptor {ECO:0000256|PIRNR:PIRNR037090};	Glutamate-gated kainate-type ion channel receptor subunit GluR5 and related subunits	GO:0016021,integral component of membrane; GO:0005622,intracellular; GO:0005886,plasma membrane; GO:0005262,calcium channel activity; GO:0008066,glutamate receptor activity; GO:0004970,ionotropic glutamate receptor activity; GO:0006816,calcium ion transport; GO:0019722,calcium-mediated signaling; GO:0007267,cell-cell signaling; GO:0071230,cellular response to amino acid stimulus; GO:0009864,induc…	Receptor family ligand binding region
gene-LOC110682157	21.15	11.98	19.93	12.68	9.71	9.97	860	477	714	471	377	385	2.094	1.066	0.00142984	0.0134719	up	NW_018743574.1	4126665	4128659	+	LOC110682157	--	K14209 solute carrier family 36 (proton-coupled amino acid transporter) | (RefSeq) amino acid transporter AVT3C-like (A)	amino acid transporter AVT3C-like [Chenopodium quinoa]	RecName: Full=Amino acid transporter AVT3C {ECO:0000305}; Short=AtAvt3C {ECO:0000303|PubMed:27925655}; AltName: Full=Aromatic and neutral amino acid transporter-like protein 2 {ECO:0000305};	SubName: Full=Uncharacterized protein {ECO:0000313|EMBL:KNA04970.1};	Amino acid transporters	GO:0016021,integral component of membrane; GO:0005774,vacuolar membrane; GO:0015171,amino acid transmembrane transporter activity; GO:0015175,neutral amino acid transmembrane transporter activity; GO:0003333,amino acid transmembrane transport; GO:0015804,neutral amino acid transport	Transmembrane amino acid transporter protein
gene-LOC110682162	0.5	0.88	0.64	1.49	2.94	1.1	61	106	69	167	344	128	0.465	-1.105	0.00374952	0.0279805	down	NW_018743574.1	4144772	4158508	+	LOC110682162	--	K08739 DNA mismatch repair protein MLH3 | (RefSeq) DNA mismatch repair protein MLH3-like isoform X1 (A)	DNA mismatch repair protein MLH3-like isoform X1 [Chenopodium quinoa]	RecName: Full=DNA mismatch repair protein MLH3; AltName: Full=MutL protein homolog 3;	SubName: Full=Uncharacterized protein {ECO:0000313|EMBL:KNA24368.1};	DNA mismatch repair protein - MLH3 family	GO:0005712,chiasma; GO:0005694,chromosome; GO:0032300,mismatch repair complex; GO:0000795,synaptonemal complex; GO:0005524,ATP binding; GO:0016887,ATPase activity; GO:0030983,mismatched DNA binding; GO:0003697,single-stranded DNA binding; GO:0006298,mismatch repair; GO:0007131,reciprocal meiotic recombination	MutL C terminal dimerisation domain
gene-LOC110682171	9.33	9.39	8.11	3.44	2.34	3.02	205	202	157	69	49	63	3.824	1.935	2.11963e-10	1.48674e-08	up	NW_018743574.1	4223095	4225391	+	LOC110682171	--	K06123 1-acylglycerone phosphate reductase [EC:1.1.1.101] | (RefSeq) hypothetical protein (A)	NADPH-dependent 1-acyldihydroxyacetone phosphate reductase-like [Chenopodium quinoa]	RecName: Full=11-beta-hydroxysteroid dehydrogenase 1B; EC=1.1.1.146; AltName: Full=17-beta-hydroxysteroid dehydrogenase 1B; EC=1.1.1.-; AltName: Full=Hydroxysteroid dehydrogenase 1; Short=AtHSD1;	SubName: Full=Uncharacterized protein {ECO:0000313|EMBL:KNA06983.1}; Flags: Fragment;	1-Acyl dihydroxyacetone phosphate reductase and related dehydrogenases	GO:0016021,integral component of membrane; GO:0005811,lipid droplet; GO:0070524,11-beta-hydroxysteroid dehydrogenase (NADP+) activity; GO:0006694,steroid biosynthetic process	short chain dehydrogenase
gene-LOC110682194	20.69	9.88	11.58	5.26	3.61	6.4	667	312	329	155	111	196	3.528	1.819	3.05151e-05	0.00059882	up	NW_018743574.1	4555399	4558134	+	LOC110682194	--	K01087 trehalose 6-phosphate phosphatase [EC:3.1.3.12] | (RefSeq) probable trehalose-phosphate phosphatase I (A)	probable trehalose-phosphate phosphatase I [Chenopodium quinoa]	RecName: Full=Probable trehalose-phosphate phosphatase J; Short=AtTPPJ; EC=3.1.3.12; AltName: Full=Trehalose 6-phosphate phosphatase;	RecName: Full=Trehalose 6-phosphate phosphatase {ECO:0000256|RuleBase:RU361117}; EC=3.1.3.12 {ECO:0000256|RuleBase:RU361117};	Trehalose-6-phosphate synthase component TPS1 and related subunits	GO:0005730,nucleolus; GO:0005634,nucleus; GO:0004805,trehalose-phosphatase activity; GO:0046686,response to cadmium ion; GO:0005992,trehalose biosynthetic process	Trehalose-phosphatase
gene-LOC110682196	29.79	18.53	20.16	9.19	15.15	10.6	550	335	328	155	267	186	2.549	1.35	4.71477e-05	0.000863756	up	NW_018743574.1	4603229	4604226	+	LOC110682196	--	K14500 BR-signaling kinase [EC:2.7.11.1] | (RefSeq) uncharacterized protein LOC108834630 (A)	PLAT domain-containing protein 3-like [Chenopodium quinoa]	RecName: Full=PLAT domain-containing protein 2 {ECO:0000305}; Short=AtPLAT2 {ECO:0000303|PubMed:25396746}; Short=PLAT domain protein 2 {ECO:0000303|PubMed:25396746}; Flags: Precursor;	SubName: Full=Uncharacterized protein {ECO:0000313|EMBL:KNA03099.1};	--	GO:0009507,chloroplast; GO:0005783,endoplasmic reticulum; GO:0016020,membrane; GO:0009579,thylakoid	PLAT/LH2 domain
gene-LOC110682220	0.44	0.59	0.42	4.09	6.29	2.21	13	17	11	110	177	62	0.148	-2.754	6.89227e-09	3.54561e-07	down	NW_018743574.1	4811115	4813204	+	LOC110682220	--	K09422 transcription factor MYB, plant | (RefSeq) transcription factor MYB16-like (A)	transcription factor MYB16-like [Chenopodium quinoa]	RecName: Full=Transcription factor MYB92 {ECO:0000303|PubMed:9839469}; AltName: Full=Myb-related protein 92 {ECO:0000303|PubMed:9839469}; Short=AtMYB92 {ECO:0000303|PubMed:9839469};	SubName: Full=Uncharacterized protein {ECO:0000313|EMBL:CDP01469.1};	Transcription factor, Myb superfamily	GO:0005634,nucleus; GO:0003700,DNA-binding transcription factor activity; GO:0000981,DNA-binding transcription factor activity, RNA polymerase II-specific; GO:0043565,sequence-specific DNA binding; GO:0001135,RNA polymerase II transcription regulator recruiting activity; GO:0044212,transcription regulatory region DNA binding; GO:0030154,cell differentiation; GO:0006357,regulation of transcription…	Myb-like DNA-binding domain
gene-LOC110682221	1.1	1.49	1.58	4.1	5.6	4.1	53	70	67	180	257	187	0.38	-1.397	1.99429e-08	9.48625e-07	down	NW_018743574.1	4820396	4824774	+	LOC110682221	--	--	--	--	--	--	--	--
gene-LOC110682232	6	7.36	7.06	3.06	3.06	3.04	533	640	552	248	259	256	2.791	1.481	4.53193e-18	9.17346e-16	up	NW_018743574.1	4930190	4939996	+	LOC110682232	--	--	uncharacterized protein LOC110682232 isoform X1 [Chenopodium quinoa]	--	SubName: Full=Uncharacterized protein {ECO:0000313|EMBL:KMT14263.1};	--	--	Plant transposase (Ptta/En/Spm family)
gene-LOC110682235	0.17	0.41	0.24	1.04	1.07	1.06	13	31	16	73	78	77	0.319	-1.648	5.02624e-05	0.000910075	down	NW_018743574.1	4956224	4962886	-	LOC110682235	--	K05681 ATP-binding cassette, subfamily G (WHITE), member 2 | (RefSeq) hypothetical protein (A)	ABC transporter G family member 11-like isoform X1 [Chenopodium quinoa]	RecName: Full=ABC transporter G family member 11; Short=ABC transporter ABCG.11; Short=AtABCG11; AltName: Full=Protein CUTICULAR DEFECT AND ORGAN FUSION 1; AltName: Full=Protein DESPERADO; AltName: Full=Protein PERMEABLE LEAVES 1; AltName: Full=White-brown complex homolog protein 11; Short=AtWBC11;	SubName: Full=Uncharacterized protein {ECO:0000313|EMBL:KNA14536.1};	Transporter, ABC superfamily (Breast cancer resistance protein)	GO:0009897,external side of plasma membrane; GO:0016021,integral component of membrane; GO:0005886,plasma membrane; GO:0005524,ATP binding; GO:0042626,ATPase activity, coupled to transmembrane movement of substances; GO:0015245,fatty acid transmembrane transporter activity; GO:0042803,protein homodimerization activity; GO:0010588,cotyledon vascular tissue pattern formation; GO:0080051,cutin trans…	ABC-2 type transporter
gene-LOC110682238	0.38	0.7	0.4	6.31	5.29	3.65	17	31	16	259	227	156	0.122	-3.039	2.26597e-16	3.94373e-14	down	NW_018743574.1	4967482	4970989	+	LOC110682238	--	K11717 cysteine desulfurase / selenocysteine lyase [EC:2.8.1.7 4.4.1.16] | (RefSeq) hypothetical protein (A)	uncharacterized protein LOC110682238 [Chenopodium quinoa]	--	SubName: Full=Uncharacterized protein {ECO:0000313|EMBL:KNA04412.1};	Uncharacterized conserved protein with similarity to predicted ATPase of the PP-loop superfamily	GO:0003824,catalytic activity	Aminotransferase class-V
gene-LOC110682246	0.44	0.41	0.17	0	0	0	12	11	4	0	0	0	60.29	5.914	0.000289854	0.00380529	up	NW_018743574.1	5027596	5030183	-	LOC110682246	--	K20802 (R)-mandelonitrile lyase [EC:4.1.2.10] | (RefSeq) MES5; methyl esterase 5 (A)	salicylic acid-binding protein 2-like [Chenopodium quinoa]	RecName: Full=Salicylic acid-binding protein 2; Short=NtSABP2; EC=3.1.1.-; AltName: Full=Methyl salicylate esterase;	SubName: Full=Uncharacterized protein {ECO:0000313|EMBL:KNA19362.1};	--	GO:0016298,lipase activity; GO:0080031,methyl salicylate esterase activity; GO:0009862,systemic acquired resistance, salicylic acid mediated signaling pathway	Alpha/beta hydrolase family
gene-LOC110682254	41.32	36.5	32.65	164.86	158.41	143.16	1777	1537	1237	6475	6503	5849	0.301	-1.734	1.00924e-15	1.58604e-13	down	NW_018743574.1	5126178	5130238	-	LOC110682254	--	K19791 iron transport multicopper oxidase | (RefSeq) L-ascorbate oxidase homolog (A)	L-ascorbate oxidase homolog [Chenopodium quinoa]	RecName: Full=L-ascorbate oxidase homolog; EC=1.10.3.-; AltName: Full=Pollen-specific protein NTP303; Flags: Precursor;	SubName: Full=Uncharacterized protein {ECO:0000313|EMBL:KNA04825.1};	Multicopper oxidases	GO:0005615,extracellular space; GO:0005507,copper ion binding; GO:0016491,oxidoreductase activity	Multicopper oxidase
gene-LOC110682259	8.44	2.23	3.25	0.3	0.29	1.26	274	71	93	9	9	39	9.608	3.264	1.3941e-05	0.000308333	up	NW_018743574.1	5194541	5197387	+	LOC110682259	--	K14491 two-component response regulator ARR-B family | (RefSeq) two-component response regulator ORR24-like (A)	transcription factor HHO5-like [Chenopodium quinoa]	RecName: Full=Transcription factor HHO5 {ECO:0000305}; AltName: Full=MYB-domain transcription factor HHO5 {ECO:0000305}; AltName: Full=Protein HRS1 HOMOLOG 5 {ECO:0000305}; AltName: Full=Protein ULT1 INTERACTING FACTOR 1 {ECO:0000303|PubMed:26903506};	SubName: Full=Uncharacterized protein {ECO:0000313|EMBL:KNA14814.1};	--	GO:0005829,cytosol; GO:0005634,nucleus; GO:0003700,DNA-binding transcription factor activity; GO:0044212,transcription regulatory region DNA binding; GO:0048449,floral organ formation; GO:0010629,negative regulation of gene expression; GO:0006355,regulation of transcription, DNA-templated; GO:0090701,specification of plant organ identity; GO:0006351,transcription, DNA-templated	Myb-like DNA-binding domain
gene-LOC110682261	6.93	7.58	9.55	3.99	4.43	5.72	380	407	461	200	232	298	2.117	1.082	4.40553e-05	0.000815121	up	NW_018742244.1	3336143	3342799	-	LOC110682261	--	K13430 serine/threonine-protein kinase PBS1 [EC:2.7.11.1] | (RefSeq) serine/threonine-protein kinase CDL1 isoform X1 (A)	probable receptor-like protein kinase At1g49730 isoform X1 [Chenopodium quinoa]	RecName: Full=Probable receptor-like protein kinase At1g49730; EC=2.7.11.1; Flags: Precursor;	SubName: Full=Uncharacterized protein {ECO:0000313|EMBL:KNA23128.1};	Serine/threonine protein kinase	GO:0016021,integral component of membrane; GO:0005886,plasma membrane; GO:0005524,ATP binding; GO:0004674,protein serine/threonine kinase activity	Protein kinase domain
gene-LOC110682268	0.8	0.71	0.72	0	0	0	23	20	18	0	0	0	137.696	7.105	1.96813e-07	7.51471e-06	up	NW_018743574.1	5267369	5270337	+	LOC110682268	--	K15634 probable phosphoglycerate mutase [EC:5.4.2.12] | (RefSeq) phosphoglycerate mutase-like protein 4 isoform X1 (A)	phosphoglycerate mutase-like protein 4 isoform X1 [Chenopodium quinoa]	RecName: Full=Phosphoglycerate mutase-like protein 4 {ECO:0000305};	SubName: Full=Uncharacterized protein {ECO:0000313|EMBL:KNA24193.1};	Phosphoglycerate mutase	GO:0005829,cytosol; GO:0016791,phosphatase activity	Histidine phosphatase superfamily (branch 1)
gene-LOC110682271	0.22	0.28	0.43	0	0	0	8	10	14	0	0	0	72.237	6.175	5.16968e-05	0.000931519	up	NW_018743574.1	5269581	5272097	+	LOC110682271	--	--	--	--	--	--	--	--
gene-LOC110682281	0.02	0.12	0.13	0.43	0.94	0.27	1	6	6	20	46	13	0.208	-2.263	0.00642388	0.0418795	down	NW_018743574.1	5413281	5419655	-	LOC110682281	--	--	uncharacterized protein LOC110682281 [Chenopodium quinoa]	--	RecName: Full=Sulfotransferase {ECO:0000256|RuleBase:RU361155}; EC=2.8.2.- {ECO:0000256|RuleBase:RU361155};	--	GO:0016021,integral component of membrane; GO:0008146,sulfotransferase activity	Sulfotransferase domain
gene-LOC110682302	0.67	1.45	1.41	5.38	15.83	3.19	42	89	78	308	948	190	0.186	-2.424	4.33222e-06	0.000114031	down	NW_018743574.1	5681783	5687575	+	LOC110682302	--	K00558 DNA (cytosine-5)-methyltransferase 1 [EC:2.1.1.37] | (RefSeq) DNA (cytosine-5)-methyltransferase 1-like (A)	DNA (cytosine-5)-methyltransferase 1-like [Chenopodium quinoa]	RecName: Full=DNA (cytosine-5)-methyltransferase CMT1 {ECO:0000305}; EC=2.1.1.37 {ECO:0000305}; AltName: Full=Chromomethylase 1 {ECO:0000305}; AltName: Full=OsMET3b {ECO:0000303|PubMed:26243209};	RecName: Full=Cytosine-specific methyltransferase {ECO:0000256|RuleBase:RU000417}; EC=2.1.1.37 {ECO:0000256|RuleBase:RU000417};	--	GO:0005634,nucleus; GO:0003682,chromatin binding; GO:0003886,DNA (cytosine-5-)-methyltransferase activity; GO:0003677,DNA binding	C-5 cytosine-specific DNA methylase
gene-LOC110682319	0.86	2.96	2.27	8.38	17.45	7.05	90	304	210	802	1746	702	0.231	-2.113	9.73458e-07	3.07519e-05	down	NW_018743574.1	5860237	5873682	+	LOC110682319	--	K02320 DNA polymerase alpha subunit A [EC:2.7.7.7] | (RefSeq) DNA polymerase alpha catalytic subunit-like (A)	DNA polymerase alpha catalytic subunit-like [Chenopodium quinoa]	RecName: Full=DNA polymerase alpha catalytic subunit; EC=2.7.7.7;	RecName: Full=DNA polymerase {ECO:0000256|RuleBase:RU000442}; EC=2.7.7.7 {ECO:0000256|RuleBase:RU000442};	DNA polymerase alpha, catalytic subunit	GO:0005658,alpha DNA polymerase:primase complex; GO:0005634,nucleus; GO:0008408,3'-5' exonuclease activity; GO:0051539,4 iron, 4 sulfur cluster binding; GO:0003677,DNA binding; GO:0003896,DNA primase activity; GO:0003887,DNA-directed DNA polymerase activity; GO:0046872,metal ion binding; GO:0001882,nucleoside binding; GO:0000166,nucleotide binding; GO:0006270,DNA replication initiation; GO:000630…	DNA polymerase family B
gene-LOC110682322	0.24	0.49	0.32	0.94	2	1.65	5	10	6	18	40	33	0.286	-1.808	0.00336049	0.0258973	down	NW_018743574.1	5924520	5926244	+	LOC110682322	--	K00588 caffeoyl-CoA O-methyltransferase [EC:2.1.1.104] | (RefSeq) caffeoyl-CoA O-methyltransferase 1-like (A)	caffeoyl-CoA O-methyltransferase 1-like [Chenopodium quinoa]	RecName: Full=Caffeoyl-CoA O-methyltransferase 2; EC=2.1.1.104; AltName: Full=Trans-caffeoyl-CoA 3-O-methyltransferase 2; Short=CCoAMT-2; Short=CCoAOMT-2;	SubName: Full=Uncharacterized protein {ECO:0000313|EMBL:EMJ02436.1};	O-methyltransferase	GO:0042409,caffeoyl-CoA O-methyltransferase activity; GO:0046872,metal ion binding; GO:0009809,lignin biosynthetic process	O-methyltransferase
gene-LOC110682331	1.67	2.58	1.94	0.9	0.58	0.59	51	77	52	25	17	17	3.717	1.894	3.13339e-06	8.58111e-05	up	NW_018743574.1	6087638	6089132	-	LOC110682331	--	K09286 EREBP-like factor | (RefSeq) ethylene-responsive transcription factor ERF010-like (A)	ethylene-responsive transcription factor ERF010-like [Chenopodium quinoa]	RecName: Full=Ethylene-responsive transcription factor ERF010;	SubName: Full=Uncharacterized protein {ECO:0000313|EMBL:KNA07728.1};	--	GO:0005634,nucleus; GO:0003677,DNA binding; GO:0003700,DNA-binding transcription factor activity; GO:0009873,ethylene-activated signaling pathway; GO:0006351,transcription, DNA-templated	AP2 domain
gene-LOC110682335	3.2	4.91	2.73	1.28	1.71	1.58	96	144	72	35	49	45	2.96	1.566	4.05274e-06	0.000107972	up	NW_018743574.1	6165266	6177209	-	LOC110682335	--	K11091 U1 small nuclear ribonucleoprotein A | (RefSeq) hypothetical protein (A)	RNA binding protein fox-1 homolog 3-like isoform X1 [Chenopodium quinoa]	--	SubName: Full=Uncharacterized protein {ECO:0000313|EMBL:KNA03590.1}; Flags: Fragment;	RNA binding protein (contains RRM repeats)	GO:0003723,RNA binding	RNA recognition motif. (a.k.a. RRM, RBD, or RNP domain)
gene-LOC110682343	2.5	3.2	2.01	6.23	6.83	9.19	79	99	56	180	206	276	0.431	-1.215	0.000151023	0.00224418	down	NW_018743574.1	6245204	6248632	-	LOC110682343	--	K13425 WRKY transcription factor 22 | (RefSeq) WRKY transcription factor 22-like (A)	probable WRKY transcription factor 15 [Chenopodium quinoa]	RecName: Full=Probable WRKY transcription factor 15; AltName: Full=WRKY DNA-binding protein 15;	SubName: Full=Uncharacterized protein {ECO:0000313|EMBL:KNA08187.1};	--	GO:0005634,nucleus; GO:0005516,calmodulin binding; GO:0003700,DNA-binding transcription factor activity; GO:0043565,sequence-specific DNA binding; GO:0044212,transcription regulatory region DNA binding; GO:0010200,response to chitin; GO:0006351,transcription, DNA-templated	WRKY DNA -binding domain
gene-LOC110682353	0.17	1.15	1.19	3.79	8.98	1.6	7	45	42	139	344	61	0.219	-2.188	0.0017645	0.0157758	down	NW_018743574.1	6392798	6396638	-	LOC110682353	--	K10436 microtubule-associated protein, RP/EB family | (RefSeq) microtubule-associated protein RP/EB family member 1C-like (A)	microtubule-associated protein RP/EB family member 1C-like [Chenopodium quinoa]	RecName: Full=Microtubule-associated protein RP/EB family member 1C; AltName: Full=APC-binding protein EB1C; AltName: Full=End-binding protein 1C; Short=AtEB1C; AltName: Full=Protein ATEB1 homolog 1; Short=AtEB1H1;	SubName: Full=Uncharacterized protein {ECO:0000313|EMBL:PIA27101.1};	Microtubule-binding protein involved in cell cycle control	GO:0005618,cell wall; GO:0005874,microtubule; GO:0005730,nucleolus; GO:0005634,nucleus; GO:0009524,phragmoplast; GO:0005819,spindle; GO:0008017,microtubule binding; GO:0007049,cell cycle; GO:0051301,cell division; GO:0030865,cortical cytoskeleton organization; GO:0009652,thigmotropism	EB1-like C-terminal motif
gene-LOC110682387	3.45	6.89	3.41	3.73	2.28	1.92	163	319	142	161	103	86	2.132	1.092	0.00472156	0.0333424	up	NW_018743574.1	6791317	6793635	-	LOC110682387	--	--	CAR1 transcription factor-like [Chenopodium quinoa]	--	SubName: Full=Uncharacterized protein {ECO:0000313|EMBL:KNA15231.1};	--	--	--
gene-LOC110682395	74.91	62.59	59.69	40.87	34.57	41.01	1832	1499	1286	913	807	953	2.138	1.096	1.43929e-05	0.000317198	up	NW_018743574.1	6854207	6856774	-	LOC110682395	--	--	uncharacterized protein ycf36-like [Chenopodium quinoa]	RecName: Full=Protein CONSERVED IN THE GREEN LINEAGE AND DIATOMS 27, chloroplastic {ECO:0000303|PubMed:23043051}; Flags: Precursor;	SubName: Full=Uncharacterized protein {ECO:0000313|EMBL:KNA10187.1};	--	GO:0009507,chloroplast; GO:0016021,integral component of membrane; GO:1990641,response to iron ion starvation	Conserved in the green lineage and diatoms 27
gene-LOC110682397	1.74	1.78	1.54	0.79	1.07	0.85	41	41	32	17	24	19	2.369	1.244	0.00274551	0.022167	up	NW_018743574.1	6855944	6857756	+	LOC110682397	--	--	--	--	--	--	--	--
gene-LOC110682401	2.44	3.08	1.89	1.71	1.25	0.98	47	58	32	30	23	18	2.363	1.24	0.00447572	0.0319712	up	NW_018743574.1	6889062	6890180	-	LOC110682401	--	--	protein PFC0760c-like [Chenopodium quinoa]	--	SubName: Full=Uncharacterized protein {ECO:0000313|EMBL:KNA21451.1};	--	GO:0016021,integral component of membrane	--
gene-LOC110682407	1.67	6.78	3.92	10.77	18.97	9.39	98	390	203	578	1064	524	0.389	-1.361	0.00160811	0.0147486	down	NW_018742244.1	3512815	3516757	-	LOC110682407	--	--	--	--	--	--	--	--
gene-LOC110682409	7.71	8.14	7.23	2.32	3.32	3	316	327	261	87	130	117	3.372	1.753	6.43517e-14	7.93635e-12	up	NW_018743574.1	6981535	6984260	-	LOC110682409	--	--	uncharacterized protein LOC110682409 [Chenopodium quinoa]	--	SubName: Full=Uncharacterized protein {ECO:0000313|EMBL:KNA02750.1};	--	--	--
gene-LOC110682410	7.2	9.75	3.64	2.19	3.25	5.15	209	277	93	58	90	142	2.408	1.268	0.00710883	0.0452209	up	NW_018743574.1	6997162	6999821	+	LOC110682410	--	K00430 peroxidase [EC:1.11.1.7] | (RefSeq) peroxidase 50-like (A)	peroxidase 50-like [Chenopodium quinoa]	RecName: Full=Peroxidase 35; Short=Atperox P35; EC=1.11.1.7; AltName: Full=ATP21a; Flags: Precursor;	RecName: Full=Peroxidase {ECO:0000256|RuleBase:RU362060, ECO:0000256|SAAS:SAAS00709852}; EC=1.11.1.7 {ECO:0000256|RuleBase:RU362060, ECO:0000256|SAAS:SAAS00709852};	--	GO:0005576,extracellular region; GO:0020037,heme binding; GO:0046872,metal ion binding; GO:0004601,peroxidase activity; GO:0042744,hydrogen peroxide catabolic process; GO:0006979,response to oxidative stress	Peroxidase
gene-LOC110682416	14.59	11.93	10.86	7.95	5.07	8.97	772	618	506	384	256	451	2.127	1.089	0.00139505	0.0132177	up	NW_018743574.1	7035486	7040387	+	LOC110682416	--	K01455 formamidase [EC:3.5.1.49] | (RefSeq) uncharacterized protein LOC110682416 isoform X1 (A)	uncharacterized protein LOC110682416 isoform X1 [Chenopodium quinoa]	--	SubName: Full=Uncharacterized protein {ECO:0000313|EMBL:OAY35542.1};	--	GO:0016811,hydrolase activity, acting on carbon-nitrogen (but not peptide) bonds, in linear amides	Acetamidase/Formamidase family
gene-LOC110682419	0.85	1.47	1.16	0.22	0.41	0.16	39	66	47	9	18	7	5.574	2.479	3.46366e-07	1.24641e-05	up	NW_018743574.1	7131126	7134013	+	LOC110682419	--	--	probable N-acetyltransferase HLS1 [Chenopodium quinoa]	RecName: Full=Probable N-acetyltransferase HLS1-like; EC=2.3.1.-;	SubName: Full=Uncharacterized protein {ECO:0000313|EMBL:KNA07929.1};	--	GO:0008080,N-acetyltransferase activity; GO:0016747,transferase activity, transferring acyl groups other than amino-acyl groups; GO:0006473,protein acetylation	Acetyltransferase (GNAT) family
gene-LOC110682423	0.85	3.11	2.08	8.19	21.15	6.19	33	118	71	290	783	228	0.214	-2.225	1.23532e-05	0.000278002	down	NW_018743574.1	7194499	7204075	-	LOC110682423	--	K19891 glucan endo-1,3-beta-glucosidase 1/2/3 [EC:3.2.1.39] | (RefSeq) hypothetical protein (A)	glucan endo-1,3-beta-glucosidase 12-like isoform X1 [Chenopodium quinoa]	RecName: Full=Glucan endo-1,3-beta-glucosidase 1; EC=3.2.1.39; AltName: Full=(1->3)-beta-glucan endohydrolase 1; Short=(1->3)-beta-glucanase 1; AltName: Full=Beta-1,3-endoglucanase 1; Short=Beta-1,3-glucanase 1; Flags: Precursor;	SubName: Full=Glycoside hydrolase {ECO:0000313|EMBL:OVA09367.1};	--	GO:0046658,anchored component of plasma membrane; GO:0042973,glucan endo-1,3-beta-D-glucosidase activity; GO:0004553,hydrolase activity, hydrolyzing O-glycosyl compounds; GO:0030247,polysaccharide binding; GO:0005975,carbohydrate metabolic process; GO:0006952,defense response	X8 domain
gene-LOC110682424	1.18	2.54	2.35	14.01	13.77	5.22	48	101	84	519	533	201	0.23	-2.12	3.39358e-07	1.22356e-05	down	NW_018743574.1	7209570	7213418	-	LOC110682424	--	K04498 E1A/CREB-binding protein [EC:2.3.1.48] | (RefSeq) histone acetyltransferase HAC1-like (A)	BTB/POZ and TAZ domain-containing protein 4-like [Chenopodium quinoa]	RecName: Full=BTB/POZ and TAZ domain-containing protein 4; AltName: Full=BTB and TAZ domain protein 4;	SubName: Full=BTB/POZ and TAZ domain-containing protein 4-like isoform X3 {ECO:0000313|RefSeq:XP_018809310.1};	CREB binding protein/P300 and related TAZ Zn-finger proteins	GO:0005737,cytoplasm; GO:0005634,nucleus; GO:0019005,SCF ubiquitin ligase complex; GO:0005774,vacuolar membrane; GO:0005516,calmodulin binding; GO:0004402,histone acetyltransferase activity; GO:0003712,transcription coregulator activity; GO:0031625,ubiquitin protein ligase binding; GO:0008270,zinc ion binding; GO:0043161,proteasome-mediated ubiquitin-dependent protein catabolic process; GO:004278…	BTB/POZ domain
gene-LOC110682434	39.82	30.08	30.26	20.73	17.07	21.76	1283	949	859	610	525	666	2.128	1.089	0.000123602	0.00191098	up	NW_018743574.1	7294260	7298831	+	LOC110682434	--	K00860 adenylylsulfate kinase [EC:2.7.1.25] | (RefSeq) adenylyl-sulfate kinase 3-like isoform X1 (A)	adenylyl-sulfate kinase 3-like isoform X1 [Chenopodium quinoa]	RecName: Full=Adenylyl-sulfate kinase, chloroplastic; EC=2.7.1.25; AltName: Full=ATP adenosine-5'-phosphosulfate 3'-phosphotransferase; AltName: Full=Adenosine-5'-phosphosulfate kinase; Short=APS kinase; Flags: Precursor;	RecName: Full=Adenylyl-sulfate kinase {ECO:0000256|RuleBase:RU004347}; EC=2.7.1.25 {ECO:0000256|RuleBase:RU004347};	Adenosine 5'-phosphosulfate kinase	GO:0009507,chloroplast; GO:0004020,adenylylsulfate kinase activity; GO:0005524,ATP binding; GO:0019344,cysteine biosynthetic process; GO:0070814,hydrogen sulfide biosynthetic process; GO:0000103,sulfate assimilation	Adenylylsulphate kinase
gene-LOC110682480	3.85	4.22	5.09	1.74	3.17	2.24	206	221	240	85	162	114	2.332	1.221	7.60458e-06	0.000183917	up	NW_018743574.1	7889118	7891743	+	LOC110682480	--	K14494 DELLA protein | (RefSeq) DELLA protein GAI-like (A)	LOW QUALITY PROTEIN: scarecrow-like protein 4 [Chenopodium quinoa]	RecName: Full=SCARECROW-LIKE protein 7 {ECO:0000303|PubMed:20616154}; AltName: Full=PeSCL7 {ECO:0000303|PubMed:20616154};	SubName: Full=Uncharacterized protein {ECO:0000313|EMBL:KNA05816.1};	--	GO:0005634,nucleus; GO:0003677,DNA binding; GO:0006355,regulation of transcription, DNA-templated; GO:0006351,transcription, DNA-templated	GRAS domain family
gene-LOC110682481	6.61	6.04	5.16	3.19	3.91	3.39	154	138	106	68	87	75	2.159	1.11	8.18886e-05	0.00136219	up	NW_018743574.1	7921386	7923830	+	LOC110682481	--	K00384 thioredoxin reductase (NADPH) [EC:1.8.1.9] | (RefSeq) thioredoxin reductase 1-like (A)	germin-like protein subfamily 2 member 4 [Chenopodium quinoa]	RecName: Full=Germin-like protein subfamily 2 member 4; Flags: Precursor;	SubName: Full=Uncharacterized protein {ECO:0000313|EMBL:KNA15705.1};	--	GO:0048046,apoplast; GO:0005618,cell wall; GO:0009505,plant-type cell wall; GO:0009506,plasmodesma; GO:0030145,manganese ion binding; GO:0045735,nutrient reservoir activity; GO:0010497,plasmodesmata-mediated intercellular transport; GO:2000280,regulation of root development	Cupin
gene-LOC110682486	4.79	4.46	2.31	1.48	0.87	0.7	167	152	71	47	29	23	4.83	2.272	1.01759e-06	3.19293e-05	up	NW_018742244.1	3562594	3564302	-	LOC110682486	--	K23260 scopoletin glucosyltransferase [EC:2.4.1.128] | (RefSeq) scopoletin glucosyltransferase-like (A)	scopoletin glucosyltransferase-like [Chenopodium quinoa]	RecName: Full=Scopoletin glucosyltransferase; EC=2.4.1.128; AltName: Full=Phenylpropanoid:glucosyltransferase 1;	RecName: Full=Glycosyltransferase {ECO:0000256|RuleBase:RU362057}; EC=2.4.1.- {ECO:0000256|RuleBase:RU362057};	UDP-glucuronosyl and UDP-glucosyl transferase	GO:0042802,identical protein binding; GO:0050275,scopoletin glucosyltransferase activity; GO:0008152,metabolic process	UDP-glucoronosyl and UDP-glucosyl transferase
gene-LOC110682506	3.42	3.22	3.17	1.58	2.12	2.09	76	70	62	32	45	44	2.144	1.1	0.00102257	0.0103505	up	NW_018743574.1	8188110	8191705	-	LOC110682506	--	K02201 pantetheine-phosphate adenylyltransferase [EC:2.7.7.3] | (RefSeq) phosphopantetheine adenylyltransferase (A)	phosphopantetheine adenylyltransferase [Chenopodium quinoa]	RecName: Full=Phosphopantetheine adenylyltransferase; EC=2.7.7.3; AltName: Full=AtCoaD; AltName: Full=Dephospho-CoA pyrophosphorylase; AltName: Full=Pantetheine-phosphate adenylyltransferase;	SubName: Full=Uncharacterized protein {ECO:0000313|EMBL:KNA17682.1};	Predicted nucleotidyltransferase	GO:0005829,cytosol; GO:0005524,ATP binding; GO:0004595,pantetheine-phosphate adenylyltransferase activity; GO:0015937,coenzyme A biosynthetic process; GO:0040007,growth; GO:0006629,lipid metabolic process; GO:0019915,lipid storage; GO:0080020,regulation of coenzyme A biosynthetic process; GO:0006970,response to osmotic stress; GO:0009651,response to salt stress	Cytidylyltransferase-like
gene-LOC110682509	47.7	27.24	37.46	25.66	19.36	15.88	1502	840	1039	738	582	475	2.373	1.247	0.000239504	0.00325568	up	NW_018743574.1	8214759	8218624	+	LOC110682509	--	K13699 abhydrolase domain-containing protein 5 [EC:2.3.1.51] | (RefSeq) hydrolase, alpha/beta fold family protein (A)	pheophytinase, chloroplastic-like isoform X1 [Chenopodium quinoa]	RecName: Full=Pheophytinase, chloroplastic; EC=3.1.1.-; AltName: Full=Pheophytin pheophorbide hydrolase; AltName: Full=Protein CO-REGULATED WITH NYE1; Flags: Precursor;	SubName: Full=Uncharacterized protein {ECO:0000313|EMBL:KNA06238.1};	Predicted hydrolase/acyltransferase (alpha/beta hydrolase superfamily)	GO:0009507,chloroplast; GO:0009570,chloroplast stroma; GO:0009535,chloroplast thylakoid membrane; GO:0080124,pheophytinase activity; GO:0015996,chlorophyll catabolic process	Alpha/beta hydrolase family
gene-LOC110682510	5.32	5.57	6.82	2.72	2.21	2.25	154	158	174	72	61	62	3.09	1.627	3.85511e-09	2.08394e-07	up	NW_018743574.1	8210478	8214081	-	LOC110682510	--	K16275 E3 ubiquitin-protein ligase BAH [EC:2.3.2.27] | (RefSeq) probable E3 ubiquitin-protein ligase BAH1-like 1 (A)	probable E3 ubiquitin-protein ligase BAH1-like 1 [Chenopodium quinoa]	RecName: Full=Probable E3 ubiquitin-protein ligase BAH1-like 1; EC=2.3.2.27 {ECO:0000305}; AltName: Full=RING-type E3 ubiquitin transferase BAH1-like 1 {ECO:0000305};	SubName: Full=Uncharacterized protein {ECO:0000313|EMBL:ESR57549.1};	--	GO:0046872,metal ion binding; GO:0016740,transferase activity; GO:0016567,protein ubiquitination	Zinc finger, C3HC4 type (RING finger)
gene-LOC110682514	9.95	14.3	12.24	7.3	7.3	5.89	297	418	322	199	208	167	2.225	1.154	2.73462e-09	1.52472e-07	up	NW_018743574.1	8240176	8244638	+	LOC110682514	--	K01726 gamma-carbonic anhydrase [EC:4.2.1.-] | (RefSeq) gamma carbonic anhydrase 1, mitochondrial-like (A)	gamma carbonic anhydrase 1, mitochondrial-like [Chenopodium quinoa]	RecName: Full=Gamma carbonic anhydrase 1, mitochondrial; Short=AtCA1; Short=GAMMA CA1; EC=4.2.1.-; Flags: Precursor;	SubName: Full=Uncharacterized protein {ECO:0000313|EMBL:KNA19667.1};	--	GO:0031966,mitochondrial membrane; GO:0005747,mitochondrial respiratory chain complex I; GO:0005739,mitochondrion; GO:0045271,respiratory chain complex I; GO:0004089,carbonate dehydratase activity; GO:0046872,metal ion binding; GO:0009853,photorespiration; GO:0070207,protein homotrimerization	Bacterial transferase hexapeptide (six repeats)
gene-LOC110682519	1.15	1.49	1.3	3.1	5.13	2.54	120	152	119	295	511	252	0.466	-1.103	6.81192e-05	0.00117133	down	NW_018743574.1	8261570	8269576	+	LOC110682519	--	--	auxilin-like protein 1 [Chenopodium quinoa]	RecName: Full=Auxilin-like protein 1;	SubName: Full=Uncharacterized protein {ECO:0000313|EMBL:KNA04158.1};	Auxilin-like protein and related proteins containing DnaJ domain	GO:0031982,vesicle; GO:0006898,receptor-mediated endocytosis	DnaJ domain
gene-LOC110682523	0.46	1.16	0.93	2.61	4.06	2.09	23	57	41	120	195	100	0.362	-1.468	0.000144817	0.00216782	down	NW_018743574.1	8288395	8295807	+	LOC110682523	--	K07252 dolichyldiphosphatase [EC:3.6.1.43] | (RefSeq) lipid phosphate phosphatase epsilon 2, chloroplastic-like (A)	lipid phosphate phosphatase epsilon 2, chloroplastic-like [Chenopodium quinoa]	RecName: Full=Lipid phosphate phosphatase epsilon 2, chloroplastic; Short=AtLPPE2; EC=3.1.3.-; AltName: Full=Phosphatidic acid phosphatase epsilon 2; AltName: Full=Plastidic phosphatidic acid phosphatase epsilon 2; Flags: Precursor;	SubName: Full=Uncharacterized protein {ECO:0000313|EMBL:KNA09294.1};	Dolichyl pyrophosphate phosphatase and related acid phosphatases	GO:0009507,chloroplast; GO:0009706,chloroplast inner membrane; GO:0016021,integral component of membrane; GO:0008195,phosphatidate phosphatase activity; GO:0006651,diacylglycerol biosynthetic process	PAP2 superfamily
gene-LOC110682536	7.21	5.26	4.37	2.53	1.54	4.09	206	147	110	66	42	111	2.577	1.366	0.00407684	0.0297905	up	NW_018743574.1	8465718	8467118	+	LOC110682536	--	K09060 plant G-box-binding factor | (RefSeq) bZIP transcription factor 16-like (A)	bZIP transcription factor 11-like [Chenopodium quinoa]	RecName: Full=bZIP transcription factor 11 {ECO:0000305}; Short=AtbZIP11 {ECO:0000303|PubMed:11906833}; AltName: Full=G-box-binding factor 6 {ECO:0000303|Ref.3}; AltName: Full=bZIP transcription factor ATB2 {ECO:0000303|PubMed:9620274};	SubName: Full=Uncharacterized protein {ECO:0000313|EMBL:KNA05678.1};	--	GO:0005634,nucleus; GO:0003700,DNA-binding transcription factor activity; GO:0046982,protein heterodimerization activity; GO:0043565,sequence-specific DNA binding; GO:0017148,negative regulation of translation; GO:0045893,positive regulation of transcription, DNA-templated; GO:0009744,response to sucrose; GO:0080149,sucrose induced translational repression; GO:0006351,transcription, DNA-templated	bZIP transcription factor
gene-LOC110682545	0.59	1.6	0.57	8.16	23.24	7.69	20	53	17	252	750	247	0.09	-3.476	1.42614e-11	1.24687e-09	down	NW_018743574.1	8531028	8533361	+	LOC110682545	--	K00430 peroxidase [EC:1.11.1.7] | (RefSeq) peroxidase 72-like (A)	peroxidase 72-like [Chenopodium quinoa]	RecName: Full=Peroxidase 72; Short=Atperox P72; EC=1.11.1.7; AltName: Full=ATP6a; AltName: Full=PRXR8; Flags: Precursor;	RecName: Full=Peroxidase {ECO:0000256|RuleBase:RU362060, ECO:0000256|SAAS:SAAS00709852}; EC=1.11.1.7 {ECO:0000256|RuleBase:RU362060, ECO:0000256|SAAS:SAAS00709852};	--	GO:0005576,extracellular region; GO:0020037,heme binding; GO:0046872,metal ion binding; GO:0004601,peroxidase activity; GO:0042744,hydrogen peroxide catabolic process; GO:0009809,lignin biosynthetic process; GO:0006979,response to oxidative stress	Peroxidase
gene-LOC110682556	1.21	1.29	0.47	0.34	0.3	0.46	47	49	16	12	11	17	3.401	1.766	0.00311573	0.0244512	up	NW_018743574.1	8623748	8632078	+	LOC110682556	--	K12637 3-epi-6-deoxocathasterone 23-monooxygenase [EC:1.14.14.147] | (RefSeq) 3-epi-6-deoxocathasterone 23-monooxygenase-like (A)	3-epi-6-deoxocathasterone 23-monooxygenase-like [Chenopodium quinoa]	RecName: Full=3-epi-6-deoxocathasterone 23-monooxygenase; EC=1.14.13.112; AltName: Full=Cytochrome P450 90C1; AltName: Full=Protein ROTUNDIFOLIA 3;	SubName: Full=Uncharacterized protein {ECO:0000313|EMBL:KNA25762.1};	Cytochrome P450 CYP4/CYP19/CYP26 subfamilies	GO:0005789,endoplasmic reticulum membrane; GO:0016021,integral component of membrane; GO:0102097,(22S)-22-hydroxy-5alpha-campestan-3-one C-23 hydroxylase activity; GO:0020037,heme binding; GO:0005506,iron ion binding; GO:0016709,oxidoreductase activity, acting on paired donors, with incorporation or reduction of molecular oxygen, NAD(P)H as one donor, and incorporation of one atom of oxygen; GO:0…	Cytochrome P450
gene-LOC110682562	1.14	2	1.59	4.63	6.17	3.46	66	113	81	244	340	190	0.417	-1.262	6.39162e-06	0.00015928	down	NW_018743574.1	8671486	8683786	+	LOC110682562	--	--	protein MICRORCHIDIA 2-like [Chenopodium quinoa]	RecName: Full=Protein MICRORCHIDIA 2 {ECO:0000303|PubMed:24799676}; Short=AtMORC2 {ECO:0000303|PubMed:24799676}; EC=3.6.-.-; AltName: Full=Protein CRT1-homolog 1 {ECO:0000303|PubMed:19704828}; Short=CRT1-h1 {ECO:0000303|PubMed:19704828};	SubName: Full=Uncharacterized protein {ECO:0000313|EMBL:KNA07408.1};	MORC family ATPases	GO:0005768,endosome; GO:0005634,nucleus; GO:0005524,ATP binding; GO:0016887,ATPase activity; GO:0003677,DNA binding; GO:0004519,endonuclease activity; GO:0016301,kinase activity; GO:0003723,RNA binding; GO:0016569,covalent chromatin modification; GO:0051607,defense response to virus; GO:0006281,DNA repair; GO:0031047,gene silencing by RNA; GO:0009626,plant-type hypersensitive response; GO:1900426…	Morc6 ribosomal protein S5 domain 2-like
gene-LOC110682587	0	0.07	0.04	0.36	1.83	1.19	0	2	1	10	54	35	0.038	-4.721	4.12567e-05	0.000772552	down	NW_018743574.1	6233017	6235881	+	LOC110682587	--	K05933 aminocyclopropanecarboxylate oxidase [EC:1.14.17.4] | (RefSeq) ACO31; acc oxidase (A)	probable 2-oxoglutarate-dependent dioxygenase At3g50210, partial [Chenopodium quinoa]	RecName: Full=Probable 2-oxoglutarate-dependent dioxygenase At3g50210; EC=1.14.11.-;	SubName: Full=Uncharacterized protein {ECO:0000313|EMBL:KNA14127.1};	Iron/ascorbate family oxidoreductases	GO:0051213,dioxygenase activity; GO:0046872,metal ion binding; GO:0009267,cellular response to starvation	non-haem dioxygenase in morphine synthesis N-terminal
gene-LOC110682653	0.52	1.54	1.22	2.43	4.73	2.27	30	87	62	128	260	124	0.434	-1.203	0.00440737	0.0316286	down	NW_018743575.1	54287	60985	+	LOC110682653	--	K09285 AP2-like factor, ANT lineage | (RefSeq) ethylene-responsive transcription factor WRI1 (A)	ethylene-responsive transcription factor WRI1-like [Chenopodium quinoa]	RecName: Full=Ethylene-responsive transcription factor WRI1; AltName: Full=Protein ACTIVATOR OF SPORAMIN::LUC 1; AltName: Full=Protein WRINKLED 1;	SubName: Full=Uncharacterized protein {ECO:0000313|EMBL:KMS98050.1};	--	GO:0005634,nucleus; GO:0003677,DNA binding; GO:0003700,DNA-binding transcription factor activity; GO:0009873,ethylene-activated signaling pathway; GO:0008610,lipid biosynthetic process; GO:0006629,lipid metabolic process; GO:0007275,multicellular organism development; GO:1901959,positive regulation of cutin biosynthetic process; GO:0006109,regulation of carbohydrate metabolic process; GO:0006110,…	AP2 domain
gene-LOC110682669	0.65	0.72	0.85	3.27	7.82	1.62	14	15	16	64	160	33	0.228	-2.135	0.00032034	0.00410708	down	NW_018743575.1	565120	568762	+	LOC110682669	--	K15730 cytosolic prostaglandin-E synthase [EC:5.3.99.3] | (RefSeq) uncharacterized protein OsI_027940-like (A)	uncharacterized protein At3g03773-like isoform X1 [Chenopodium quinoa]	RecName: Full=Uncharacterized protein OsI_027940;	SubName: Full=Uncharacterized protein {ECO:0000313|EMBL:KNA20957.1};	HSP90 co-chaperone p23	GO:0005829,cytosol; GO:0005634,nucleus; GO:0005886,plasma membrane; GO:0009506,plasmodesma; GO:0080037,negative regulation of cytokinin-activated signaling pathway; GO:0010628,positive regulation of gene expression; GO:2000012,regulation of auxin polar transport; GO:0010449,root meristem growth	CS domain
gene-LOC110682689	2.3	0	4.32	0.07	0.06	0.06	38	0	63	1	1	1	44.283	5.469	0.000260256	0.00349054	up	NW_018743591.1	434040	443919	-	LOC110682689	--	K06268 serine/threonine-protein phosphatase 2B regulatory subunit | (RefSeq) uncharacterized protein LOC110682689 (A)	uncharacterized protein LOC110682689 [Chenopodium quinoa]	RecName: Full=Calcineurin B-like protein 1; AltName: Full=SOS3-like calcium-binding protein 5;	SubName: Full=Uncharacterized protein {ECO:0000313|EMBL:KNA25577.1};	Ca2+/calmodulin-dependent protein phosphatase (calcineurin subunit B), EF-Hand superfamily protein	GO:0005737,cytoplasm; GO:0005886,plasma membrane; GO:0090406,pollen tube; GO:0005509,calcium ion binding; GO:0019900,kinase binding; GO:0009738,abscisic acid-activated signaling pathway; GO:0019722,calcium-mediated signaling; GO:0009860,pollen tube growth; GO:0009409,response to cold; GO:0006970,response to osmotic stress; GO:0009651,response to salt stress; GO:0009414,response to water deprivati…	EF hand
gene-LOC110682699	0.54	0.59	0.62	0	0	0	46	50	47	0	0	0	321.415	8.328	4.34584e-11	3.50348e-09	up	NW_018743591.1	276232	280709	-	LOC110682699	--	--	--	--	--	--	--	--
gene-LOC110682718	0.03	1.36	1.79	7.99	8.16	4.36	1	49	58	268	286	152	0.187	-2.418	0.00315879	0.0247214	down	NW_018743593.1	1022835	1026022	+	LOC110682718	--	K00679 phospholipid:diacylglycerol acyltransferase [EC:2.3.1.158] | (RefSeq) hypothetical protein (A)	GDSL esterase/lipase At1g33811-like [Chenopodium quinoa]	RecName: Full=GDSL esterase/lipase At1g33811; EC=3.1.1.-; AltName: Full=Extracellular lipase At1g33811; Flags: Precursor;	SubName: Full=Uncharacterized protein {ECO:0000313|EMBL:KNA10996.1};	--	GO:0005576,extracellular region; GO:0016788,hydrolase activity, acting on ester bonds; GO:0016042,lipid catabolic process	GDSL-like Lipase/Acylhydrolase
gene-LOC110682748	0.13	0.34	0.16	0.86	3.44	0.56	11	29	12	68	283	46	0.167	-2.579	0.000159549	0.00233677	down	NW_018743593.1	436338	443274	+	LOC110682748	--	K11491 condensin-2 complex subunit D3 | (RefSeq) condensin-2 complex subunit D3-like (A)	condensin-2 complex subunit D3-like [Chenopodium quinoa]	--	SubName: Full=Uncharacterized protein {ECO:0000313|EMBL:KNA17361.1};	Uncharacterized conserved protein related to condensin complex subunit 1	GO:0007076,mitotic chromosome condensation	non-SMC mitotic condensation complex subunit 1
gene-LOC110682764	0.05	0.02	0.08	0.24	0.54	0.49	3	1	4	13	31	28	0.142	-2.818	0.000838725	0.00885189	down	NW_018743593.1	1378970	1386348	-	LOC110682764	--	K05894 12-oxophytodienoic acid reductase [EC:1.3.1.42] | (RefSeq) putative 12-oxophytodienoate reductase 11 isoform X1 (A)	12-oxophytodienoate reductase 1-like [Chenopodium quinoa]	RecName: Full=12-oxophytodienoate reductase 1; EC=1.3.1.42; AltName: Full=12-oxophytodienoate-10,11-reductase 1; Short=OPDA-reductase 1; AltName: Full=LeOPR1;	SubName: Full=Uncharacterized protein {ECO:0000313|EMBL:KNA25325.1}; Flags: Fragment;	NADH:flavin oxidoreductase/12-oxophytodienoate reductase	GO:0005737,cytoplasm; GO:0005622,intracellular; GO:0016629,12-oxophytodienoate reductase activity; GO:0010181,FMN binding; GO:0055114,oxidation-reduction process; GO:0031408,oxylipin biosynthetic process	NADH:flavin oxidoreductase / NADH oxidase family
gene-LOC110682786	0.7	1.15	1.44	0	0	0	5	8	9	0	0	0	49.258	5.622	0.00065055	0.00726311	up	NW_018743593.1	2514665	2515968	-	LOC110682786	--	--	--	--	--	--	--	--
gene-LOC110682787	13.42	12.52	6.89	6.26	5.83	6.72	345	315	156	147	143	164	2.208	1.143	0.00101172	0.0102663	up	NW_018743593.1	2640818	2644897	+	LOC110682787	--	--	uncharacterized protein LOC110682787 [Chenopodium quinoa]	RecName: Full=Protein MARD1 {ECO:0000303|PubMed:15159630}; AltName: Full=Mediator of ABA-regulated dormancy1 {ECO:0000303|PubMed:15159630}; AltName: Full=Senescence-associated protein SAG102 {ECO:0000303|PubMed:11402199};	SubName: Full=Uncharacterized protein {ECO:0000313|EMBL:KNA15230.1};	--	GO:0010494,cytoplasmic stress granule; GO:0000932,P-body; GO:0046872,metal ion binding; GO:0009737,response to abscisic acid; GO:0010162,seed dormancy process	zinc-finger of the FCS-type, C2-C2
gene-LOC110682802	5.97	7.97	7.7	21.15	22.77	11.95	111	145	126	359	404	211	0.489	-1.032	0.00023951	0.00325568	down	NW_018743593.1	3171008	3172608	-	LOC110682802	--	K07213 copper chaperone | (RefSeq) copper transport protein ATX1-like (A)	heavy metal-associated isoprenylated plant protein 24-like [Chenopodium quinoa]	RecName: Full=Heavy metal-associated isoprenylated plant protein 24 {ECO:0000303|PubMed:21072340, ECO:0000303|PubMed:23368984}; Short=AtHIP24 {ECO:0000303|PubMed:21072340, ECO:0000303|PubMed:23368984}; Flags: Precursor;	SubName: Full=Uncharacterized protein {ECO:0000313|EMBL:KNA07098.1}; Flags: Fragment;	Copper chaperone	GO:0005737,cytoplasm; GO:0046914,transition metal ion binding; GO:0046916,cellular transition metal ion homeostasis; GO:0030001,metal ion transport	Heavy-metal-associated domain
gene-LOC110682807	0.15	0.94	0.38	0.05	0.15	0	7	44	16	2	7	0	9.193	3.201	0.00296445	0.0235468	up	NW_018743593.1	3341589	3344301	+	LOC110682807	--	--	--	--	--	--	--	--
gene-LOC110682905	35.23	50.34	54.2	22.94	26.35	27.5	1224	1713	1659	728	874	908	2.259	1.176	4.95035e-09	2.62644e-07	up	NW_018743613.1	300208	302376	+	LOC110682905	--	K07374 tubulin alpha | (RefSeq) tubulin alpha-3 chain (A)	tubulin alpha-3 chain [Chenopodium quinoa]	RecName: Full=Tubulin alpha-5 chain;	RecName: Full=Tubulin alpha chain {ECO:0000256|RuleBase:RU000352};	Alpha tubulin	GO:0005737,cytoplasm; GO:0005874,microtubule; GO:0005525,GTP binding; GO:0003924,GTPase activity; GO:0005200,structural constituent of cytoskeleton; GO:0007017,microtubule-based process	Tubulin/FtsZ family, GTPase domain
gene-LOC110682948	1.91	2.2	1.23	9	7.48	6.99	23	26	13	99	86	80	0.287	-1.802	4.22359e-06	0.000111724	down	NW_018743616.1	1192949	1193886	-	LOC110682948	--	--	--	--	--	--	--	--
gene-LOC110682951	0.66	0.81	1.44	2.87	4.37	1.9	21	25	40	83	132	57	0.403	-1.31	0.00346936	0.0264787	down	NW_018742263.1	4196635	4199537	+	LOC110682951	--	--	--	--	--	--	--	--
gene-LOC110682953	33.43	50.2	40.89	0	0	0	387	569	417	0	0	0	3051.84	11.575	5.60003e-22	2.02498e-19	up	NW_018743616.1	2694678	2695659	-	LOC110682953	--	--	--	--	--	--	--	--
gene-LOC110682959	0.07	0.76	0.59	2.29	5.44	2.01	2	20	14	56	139	51	0.182	-2.458	0.000302778	0.00392515	down	NW_018743616.1	54971	66059	+	LOC110682959	--	--	guanine nucleotide-binding protein subunit gamma 3-like [Chenopodium quinoa]	RecName: Full=Guanine nucleotide-binding protein subunit gamma 3; AltName: Full=Ggamma-subunit 3; AltName: Full=Heterotrimeric G protein gamma-subunit 3; Short=AtAGG3; Flags: Precursor;	SubName: Full=Uncharacterized protein {ECO:0000313|EMBL:KMS95802.1};	--	GO:0005834,heterotrimeric G-protein complex; GO:0005886,plasma membrane; GO:0004871,NA; GO:0007186,G protein-coupled receptor signaling pathway; GO:0009737,response to abscisic acid	GGL domain
gene-LOC110682964	3.49	4.9	6.63	2.75	2.97	2.05	217	298	363	156	176	121	2.42	1.275	5.14919e-06	0.000132081	up	NW_018743616.1	193724	202563	-	LOC110682964	--	K16609 tubulin--tyrosine ligase-like protein 12 | (RefSeq) tubulin--tyrosine ligase-like protein 12 isoform X1 (A)	tubulin--tyrosine ligase-like protein 12 isoform X1 [Chenopodium quinoa]	--	SubName: Full=Uncharacterized protein {ECO:0000313|EMBL:KNA13239.1};	Tubulin-tyrosine ligase-related protein	GO:0005524,ATP binding; GO:0003824,catalytic activity; GO:0006464,cellular protein modification process	Tubulin-tyrosine ligase family
gene-LOC110682969	0.81	1.63	0.64	4.38	6.67	5.85	23	45	16	113	180	157	0.227	-2.136	6.18363e-08	2.65639e-06	down	NW_018743616.1	293448	294834	+	LOC110682969	--	--	putative uncharacterized protein DDB_G0283051 [Chenopodium quinoa]	--	SubName: Full=Uncharacterized protein {ECO:0000313|EMBL:KMS96215.1};	--	--	Fruit fly transformer protein
gene-LOC110683053	0	0	0	1.57	1.95	1.2	0	0	0	83	108	66	0.003	-8.537	7.68932e-12	7.05391e-10	down	NW_018743616.1	2720512	2725983	+	LOC110683053	--	K15446 tRNA:m4X modification enzyme [EC:2.1.1.225] | (RefSeq) tRNA:m(4)X modification enzyme TRM13 homolog (A)	uncharacterized protein LOC110683053 isoform X1 [Chenopodium quinoa]	RecName: Full=tRNA:m(4)X modification enzyme TRM13 {ECO:0000305}; EC=2.1.1.225 {ECO:0000305|PubMed:28369540}; AltName: Full=tRNA methylase 13 {ECO:0000305}; Short=OsTRM13 {ECO:0000303|PubMed:28369540};	SubName: Full=Uncharacterized protein {ECO:0000313|EMBL:KNA19593.1};	Uncharacterized conserved protein	GO:0005737,cytoplasm; GO:0005634,nucleus; GO:0046872,metal ion binding; GO:0008175,tRNA methyltransferase activity; GO:0009651,response to salt stress; GO:0030488,tRNA methylation	Methyltransferase TRM13
gene-LOC110683078	0.23	0.13	0.19	1.32	0.61	1.18	16	9	12	85	41	79	0.222	-2.174	8.71195e-05	0.00143194	down	NW_018743616.1	3167480	3170943	-	LOC110683078	--	--	--	--	--	--	--	--
gene-LOC110683079	5.46	2.42	1.68	18.89	13.15	7.8	442	192	120	1397	1016	600	0.317	-1.659	0.0013064	0.0125534	down	NW_018743616.1	3191406	3195377	-	LOC110683079	--	K01537 P-type Ca2+ transporter type 2C [EC:7.2.2.10] | (RefSeq) putative calcium-transporting ATPase 13, plasma membrane-type (A)	putative calcium-transporting ATPase 13, plasma membrane-type [Chenopodium quinoa]	RecName: Full=Putative calcium-transporting ATPase 13, plasma membrane-type; EC=3.6.3.8; AltName: Full=Ca(2+)-ATPase isoform 13;	RecName: Full=Calcium-transporting ATPase {ECO:0000256|RuleBase:RU361146}; EC=3.6.3.8 {ECO:0000256|RuleBase:RU361146};	Calcium transporting ATPase	GO:0005887,integral component of plasma membrane; GO:0043231,intracellular membrane-bounded organelle; GO:0005524,ATP binding; GO:0005388,calcium-transporting ATPase activity; GO:0005516,calmodulin binding; GO:0046872,metal ion binding	Cation transporting ATPase, C-terminus
gene-LOC110683080	9.16	8.61	5.91	20.96	30.76	15.93	373	343	212	779	1195	616	0.452	-1.145	0.000149264	0.00222374	down	NW_018743616.1	3240990	3242986	-	LOC110683080	--	--	uncharacterized protein LOC110683080 [Chenopodium quinoa]	--	SubName: Full=Uncharacterized protein {ECO:0000313|EMBL:KNA04932.1};	--	GO:0016021,integral component of membrane	Cotton fibre expressed protein
gene-LOC110683083	37.49	45.6	50.74	21.23	29.07	29.93	816	972	973	422	604	619	2.085	1.06	1.04331e-06	3.25426e-05	up	NW_018742263.1	6363631	6364698	-	LOC110683083	--	--	protein E6-like [Chenopodium quinoa]	--	SubName: Full=Uncharacterized protein {ECO:0000313|EMBL:KNA15890.1};	--	--	--
gene-LOC110683086	0.14	0.41	0.16	3.58	3.52	3.72	6	17	6	138	142	149	0.082	-3.613	1.56621e-16	2.76463e-14	down	NW_018743616.1	3435104	3439015	-	LOC110683086	--	K00924 kinase [EC:2.7.1.-] | (RefSeq) probable receptor-like protein kinase At3g55450 isoform X1 (A)	probable serine/threonine-protein kinase PBL16 [Chenopodium quinoa]	RecName: Full=Probable serine/threonine-protein kinase PBL16 {ECO:0000305}; EC=2.7.11.1 {ECO:0000305}; AltName: Full=PBS1-like protein 16 {ECO:0000303|PubMed:20413097};	SubName: Full=Uncharacterized protein {ECO:0000313|EMBL:KNA18122.1};	Serine/threonine protein kinase	GO:0005886,plasma membrane; GO:0009506,plasmodesma; GO:0005524,ATP binding; GO:0004675,transmembrane receptor protein serine/threonine kinase activity; GO:0007166,cell surface receptor signaling pathway; GO:0006952,defense response; GO:0006468,protein phosphorylation	Protein tyrosine kinase
gene-LOC110683095	9.09	11.43	8.97	5.05	5.46	4.79	260	320	226	132	149	130	2.42	1.275	3.85149e-10	2.54342e-08	up	NW_018743616.1	3700183	3702998	+	LOC110683095	--	K13066 caffeic acid 3-O-methyltransferase [EC:2.1.1.68] | (RefSeq) COMT1-2; caffeic acid O-methyltransferase (A)	caffeic acid 3-O-methyltransferase-like [Chenopodium quinoa]	RecName: Full=Caffeic acid 3-O-methyltransferase; Short=CAOMT; Short=COMT; EC=2.1.1.68; AltName: Full=S-adenosysl-L-methionine:caffeic acid 3-O-methyltransferase;	SubName: Full=Uncharacterized protein {ECO:0000313|EMBL:KNA19751.1};	Hydroxyindole-O-methyltransferase and related SAM-dependent methyltransferases	GO:0047763,caffeate O-methyltransferase activity; GO:0046983,protein dimerization activity; GO:0009809,lignin biosynthetic process	O-methyltransferase domain
gene-LOC110683155	48.3	40.94	50.04	4	8.37	1.16	1705	1415	1556	129	282	39	13.64	3.77	4.72184e-13	5.0828e-11	up	NW_018743623.1	136624	143742	-	LOC110683155	--	K01609 indole-3-glycerol phosphate synthase [EC:4.1.1.48] | (RefSeq) indole-3-glycerol phosphate synthase, chloroplastic-like isoform X1 (A)	indole-3-glycerol phosphate synthase, chloroplastic-like isoform X2 [Chenopodium quinoa]	RecName: Full=Indole-3-glycerol phosphate synthase, chloroplastic {ECO:0000303|PubMed:7610197}; Short=IGPS {ECO:0000303|PubMed:7610197}; EC=4.1.1.48 {ECO:0000269|PubMed:7610197}; Flags: Precursor;	SubName: Full=Uncharacterized protein {ECO:0000313|EMBL:KNA03126.1};	Anthranilate synthase component II	GO:0009507,chloroplast; GO:0009570,chloroplast stroma; GO:0005829,cytosol; GO:0005507,copper ion binding; GO:0004425,indole-3-glycerol-phosphate synthase activity; GO:0000162,tryptophan biosynthetic process	Indole-3-glycerol phosphate synthase
gene-LOC110683163	0.73	1.33	0.82	0.33	0.45	0.15	53	94	52	22	31	10	3.913	1.968	2.60202e-05	0.000522719	up	NW_018743623.1	212737	216401	+	LOC110683163	--	K15078 structure-specific endonuclease subunit SLX1 [EC:3.6.1.-] | (RefSeq) putative disease resistance protein RGA3 (A)	putative disease resistance protein RGA4 [Chenopodium quinoa]	RecName: Full=Putative disease resistance protein RGA3; AltName: Full=Blight resistance protein B149; AltName: Full=RGA1-blb;	SubName: Full=Uncharacterized protein {ECO:0000313|EMBL:KMS96021.1};	Apoptotic ATPase	GO:0043531,ADP binding; GO:0005524,ATP binding; GO:0006952,defense response	NB-ARC domain
gene-LOC110683171	2460.1	2122.02	2692.65	1341.82	934.31	1645.33	137174	115869	132268	68337	49733	87165	2.307	1.206	9.55275e-05	0.00154223	up	NW_018743623.1	332540	337999	+	LOC110683171	--	K00549 5-methyltetrahydropteroyltriglutamate--homocysteine methyltransferase [EC:2.1.1.14] | (RefSeq) 5-methyltetrahydropteroyltriglutamate-- homocysteine methyltransferase (A)	5-methyltetrahydropteroyltriglutamate--homocysteine methyltransferase [Chenopodium quinoa]	RecName: Full=5-methyltetrahydropteroyltriglutamate--homocysteine methyltransferase; EC=2.1.1.14; AltName: Full=Cobalamin-independent methionine synthase isozyme; AltName: Full=Vitamin-B12-independent methionine synthase isozyme;	SubName: Full=Uncharacterized protein {ECO:0000313|EMBL:KNA04237.1};	Methionine synthase II (cobalamin-independent)	GO:0005737,cytoplasm; GO:0003871,5-methyltetrahydropteroyltriglutamate-homocysteine S-methyltransferase activity; GO:0008270,zinc ion binding; GO:0009086,methionine biosynthetic process	Cobalamin-independent synthase, Catalytic domain
gene-LOC110683177	0	0	0.09	1.28	1.84	1.58	0	0	1	14	21	18	0.025	-5.304	0.000146106	0.00218367	down	NW_018743623.1	567969	569716	+	LOC110683177	--	--	--	--	--	--	--	--
gene-LOC110683198	0	0	0	3.63	5.25	4.59	0	0	0	41	62	54	0.004	-7.832	8.45862e-10	5.21592e-08	down	NW_018742263.1	1918079	1919379	+	LOC110683198	--	--	--	--	--	--	--	--
gene-LOC110683255	1.07	4.26	4.5	11.43	26.93	10.58	67	262	249	656	1616	632	0.25	-1.998	5.66491e-05	0.00100663	down	NW_018743649.1	406768	412481	+	LOC110683255	--	K02542 DNA replication licensing factor MCM6 [EC:3.6.4.12] | (RefSeq) DNA replication licensing factor MCM6-like (A)	DNA replication licensing factor MCM6-like [Chenopodium quinoa]	RecName: Full=DNA replication licensing factor MCM6; EC=3.6.4.12; AltName: Full=Minichromosome maintenance protein 6; Short=AtMCM6;	RecName: Full=DNA helicase {ECO:0000256|SAAS:SAAS00536514}; EC=3.6.4.12 {ECO:0000256|SAAS:SAAS00536514};	DNA replication licensing factor, MCM6 component	GO:0042555,MCM complex; GO:0000347,THO complex; GO:0005524,ATP binding; GO:0003677,DNA binding; GO:0003678,DNA helicase activity; GO:0046872,metal ion binding; GO:0007049,cell cycle; GO:0006270,DNA replication initiation; GO:0006268,DNA unwinding involved in DNA replication	MCM P-loop domain
gene-LOC110683276	3.55	0.41	0.15	0.19	0.28	0.14	80	9	3	4	6	3	9.395	3.232	0.00478241	0.0336903	up	NW_018743652.1	143114	148672	-	LOC110683276	--	K08516 synaptobrevin homolog YKT6 | (RefSeq) VAMP-like protein YKT61 (A)	VAMP-like protein YKT61 [Chenopodium quinoa]	RecName: Full=VAMP-like protein YKT61; Short=AtYKT61; AltName: Full=Geranylgeranylated protein 1; Short=AtGP1; Flags: Precursor;	SubName: Full=Uncharacterized protein {ECO:0000313|EMBL:KMS96405.1};	SNARE protein YKT6, synaptobrevin/VAMP syperfamily	GO:0016021,integral component of membrane; GO:0005886,plasma membrane; GO:0031201,SNARE complex; GO:0005484,SNAP receptor activity; GO:0000149,SNARE binding; GO:0006887,exocytosis; GO:0015031,protein transport; GO:0006906,vesicle fusion	Synaptobrevin
gene-LOC110683289	16.37	13.63	8.21	3.67	3.48	9.77	439	358	194	90	89	249	2.805	1.488	0.00364651	0.0274373	up	NW_018743669.1	397397	398712	+	LOC110683289	--	K14686 solute carrier family 31 (copper transporter), member 1 | (RefSeq) copper transporter 6-like (A)	copper transporter 6-like [Chenopodium quinoa]	RecName: Full=Copper transporter 6; Short=AtCOPT6;	SubName: Full=Uncharacterized protein {ECO:0000313|EMBL:KNA10675.1};	Copper transporter	GO:0016021,integral component of membrane; GO:0005773,vacuole; GO:0005375,copper ion transmembrane transporter activity	Ctr copper transporter family
gene-LOC110683314	73.92	59.23	56.27	21.99	14.09	26.31	2061	1617	1382	560	375	697	3.795	1.924	1.86102e-08	8.95528e-07	up	NW_018743669.1	1411615	1417053	+	LOC110683314	--	K20716 mitogen-activated protein kinase kinase kinase 17/18 | (RefSeq) mitogen-activated protein kinase kinase kinase 18-like (A)	mitogen-activated protein kinase kinase kinase 18-like [Chenopodium quinoa]	RecName: Full=Mitogen-activated protein kinase kinase kinase 17 {ECO:0000303|PubMed:25720833}; EC=2.7.11.25 {ECO:0000250|UniProtKB:Q9ZVP5, ECO:0000255|PROSITE-ProRule:PRU00159};	SubName: Full=Uncharacterized protein {ECO:0000313|EMBL:KNA23213.1};	MEKK and related serine/threonine protein kinases	GO:0005737,cytoplasm; GO:0005634,nucleus; GO:0005524,ATP binding; GO:0004709,MAP kinase kinase kinase activity; GO:0004674,protein serine/threonine kinase activity; GO:0004702,NA; GO:0009738,abscisic acid-activated signaling pathway; GO:0032147,activation of protein kinase activity; GO:0007346,regulation of mitotic cell cycle; GO:0009737,response to abscisic acid; GO:0006970,response to osmotic s…	Protein kinase domain
gene-LOC110683324	0.5	0.1	0.23	0	0	0	10	2	4	0	0	0	37.435	5.226	0.00637122	0.0416455	up	NW_018743669.1	2249306	2250370	-	LOC110683324	--	K02218 casein kinase 1 [EC:2.7.11.1] | (RefSeq) uncharacterized protein LOC8069780 (A)	putative nuclease HARBI1 [Chenopodium quinoa]	RecName: Full=Protein ALP1-like {ECO:0000305}; EC=3.1.-.-;	SubName: Full=PIF-like transposase {ECO:0000313|EMBL:ABB83644.1};	Predicted transposase	GO:0005634,nucleus; GO:0046872,metal ion binding; GO:0004518,nuclease activity	DDE superfamily endonuclease
gene-LOC110683335	0.22	0.26	0.14	2.55	2.61	1.65	7	8	4	73	78	49	0.118	-3.086	2.68709e-09	1.50271e-07	down	NW_018743669.1	80921	85465	-	LOC110683335	--	K16283 E3 ubiquitin-protein ligase SDIR1 [EC:2.3.2.27] | (RefSeq) E3 ubiquitin-protein ligase SDIR1-like (A)	E3 ubiquitin-protein ligase SDIR1-like [Chenopodium quinoa]	RecName: Full=E3 ubiquitin-protein ligase SDIR1 {ECO:0000305}; EC=2.3.2.27 {ECO:0000269|PubMed:17573536}; AltName: Full=Protein SALT- AND DROUGHT-INDUCED RING FINGER 1 {ECO:0000303|PubMed:17573536}; AltName: Full=RING-type E3 ubiquitin transferase SDIR1 {ECO:0000305};	SubName: Full=Uncharacterized protein {ECO:0000313|EMBL:KNA12839.1};	FOG: Predicted E3 ubiquitin ligase	GO:0005789,endoplasmic reticulum membrane; GO:0016021,integral component of membrane; GO:0043231,intracellular membrane-bounded organelle; GO:0031090,organelle membrane; GO:0046872,metal ion binding; GO:0061630,ubiquitin protein ligase activity; GO:0004842,ubiquitin-protein transferase activity; GO:0009789,positive regulation of abscisic acid-activated signaling pathway; GO:0043161,proteasome-med…	Ring finger domain
gene-LOC110683351	7.82	5.14	6.15	3.77	3.35	4.95	384	247	266	169	157	231	2.004	1.003	0.00341451	0.0261512	up	NW_018743669.1	174984	177391	+	LOC110683351	--	K01176 alpha-amylase [EC:3.2.1.1] | (RefSeq) lectin-domain containing receptor kinase VI.3-like (A)	L-type lectin-domain containing receptor kinase IV.1-like [Chenopodium quinoa]	RecName: Full=L-type lectin-domain containing receptor kinase IV.2 {ECO:0000303|PubMed:19773388}; Short=Arabidopsis thaliana lectin-receptor kinase a4 {ECO:0000303|PubMed:19773388}; Short=AthlecRK-a4 {ECO:0000303|Ref.6}; Short=LecRK-IV.2 {ECO:0000303|PubMed:19773388}; EC=2.7.11.1 {ECO:0000255|PROSITE-ProRule:PRU00159}; AltName: Full=Protein SMALL, GLUED-TOGETHER, AND COLLAPSED POLLEN {ECO:0000303…	SubName: Full=Uncharacterized protein {ECO:0000313|EMBL:OAY61180.1};	--	GO:0016021,integral component of membrane; GO:0005886,plasma membrane; GO:0005524,ATP binding; GO:0030246,carbohydrate binding; GO:0004674,protein serine/threonine kinase activity; GO:0042742,defense response to bacterium; GO:0009555,pollen development	Legume lectin domain
gene-LOC110683379	51.42	20.5	26.58	7.18	3.94	23.6	1708	667	778	218	125	745	3.551	1.828	0.00543018	0.0370416	up	NW_018743669.1	391909	393972	-	LOC110683379	--	K13493 cytokinin-N-glucosyltransferase [EC:2.4.1.-] | (RefSeq) hypothetical protein (A)	UDP-glycosyltransferase 76E4-like [Chenopodium quinoa]	RecName: Full=UDP-glycosyltransferase 76H1 {ECO:0000303|PubMed:15610349}; EC=2.4.1.- {ECO:0000305};	SubName: Full=Uncharacterized protein {ECO:0000313|EMBL:ESR41069.1};	UDP-glucuronosyl and UDP-glucosyl transferase	GO:0016758,transferase activity, transferring hexosyl groups; GO:0008152,metabolic process	UDP-glucoronosyl and UDP-glucosyl transferase
gene-LOC110683395	3.94	8.91	12.35	29.24	70.53	22	97	215	268	658	1659	515	0.263	-1.927	3.8257e-05	0.000723657	down	NW_018743669.1	542870	545257	-	LOC110683395	--	K04802 proliferating cell nuclear antigen | (RefSeq) proliferating cell nuclear antigen (A)	proliferating cell nuclear antigen [Chenopodium quinoa]	RecName: Full=Proliferating cell nuclear antigen; Short=PCNA;	RecName: Full=Proliferating cell nuclear antigen {ECO:0000256|RuleBase:RU000641};	DNA polymerase delta processivity factor (proliferating cell nuclear antigen)	GO:0005634,nucleus; GO:0003677,DNA binding; GO:0030337,DNA polymerase processivity factor activity; GO:0006260,DNA replication; GO:0006275,regulation of DNA replication	Proliferating cell nuclear antigen, C-terminal domain
gene-LOC110683403	463.66	348.03	408.93	270.99	175.42	227.9	9591	7050	7452	5120	3464	4479	2.281	1.19	5.31903e-05	0.000953355	up	NW_018743669.1	603617	605060	+	LOC110683403	--	K00799 glutathione S-transferase [EC:2.5.1.18] | (RefSeq) probable glutathione S-transferase (A)	probable glutathione S-transferase [Chenopodium quinoa]	RecName: Full=Probable glutathione S-transferase; EC=2.5.1.18; AltName: Full=Auxin-induced protein PCNT107;	SubName: Full=probable glutathione S-transferase parC {ECO:0000313|RefSeq:XP_010245130.1};	Glutathione S-transferase	GO:0004364,glutathione transferase activity; GO:0009734,auxin-activated signaling pathway	Glutathione S-transferase, N-terminal domain
gene-LOC110683407	2.57	1.91	2.78	7.75	6.07	6.57	80	58	76	220	180	194	0.449	-1.156	0.00025616	0.00344304	down	NW_018743669.1	623549	626844	-	LOC110683407	--	K13430 serine/threonine-protein kinase PBS1 [EC:2.7.11.1] | (RefSeq) serine/threonine-protein kinase PBL27-like isoform X1 (A)	calmodulin-binding receptor-like cytoplasmic kinase 2 [Chenopodium quinoa]	RecName: Full=Calmodulin-binding receptor-like cytoplasmic kinase 1; EC=2.7.11.1;	SubName: Full=Uncharacterized protein {ECO:0000313|EMBL:KNA25207.1};	Serine/threonine protein kinase	GO:0005737,cytoplasm; GO:0005524,ATP binding; GO:0005516,calmodulin binding; GO:0004683,calmodulin-dependent protein kinase activity; GO:0004674,protein serine/threonine kinase activity; GO:0009737,response to abscisic acid; GO:0009409,response to cold; GO:0042542,response to hydrogen peroxide; GO:0009651,response to salt stress	Protein kinase domain
gene-LOC110683422	108.03	56.38	75.25	30.65	19.98	25.83	6880	3516	4222	1783	1215	1563	4.006	2.002	3.79996e-08	1.6889e-06	up	NW_018743669.1	765434	770633	+	LOC110683422	--	K03147 phosphomethylpyrimidine synthase [EC:4.1.99.17] | (RefSeq) phosphomethylpyrimidine synthase, chloroplastic-like isoform X1 (A)	phosphomethylpyrimidine synthase, chloroplastic-like isoform X1 [Chenopodium quinoa]	RecName: Full=Phosphomethylpyrimidine synthase, chloroplastic; EC=4.1.99.17; AltName: Full=Hydroxymethylpyrimidine phosphate synthase; Short=HMP-P synthase; Short=HMP-phosphate synthase; Short=HMPP synthase; AltName: Full=Protein PYRIMIDINE REQUIRING; AltName: Full=Thiamine biosynthesis protein ThiC; Short=Protein THIAMINE C; Flags: Precursor;	SubName: Full=Uncharacterized protein {ECO:0000313|EMBL:KNA05284.1};	--	GO:0009507,chloroplast; GO:0009570,chloroplast stroma; GO:0009536,plastid; GO:0051539,4 iron, 4 sulfur cluster binding; GO:0080041,ADP-ribose pyrophosphohydrolase activity; GO:0016830,carbon-carbon lyase activity; GO:0051536,iron-sulfur cluster binding; GO:0046872,metal ion binding; GO:0019904,protein domain specific binding; GO:0010266,response to vitamin B1; GO:0009228,thiamine biosynthetic pro…	Radical SAM ThiC family
gene-LOC110683434	0.5	0.98	0.86	2.88	5.88	2.4	23	44	35	121	258	105	0.266	-1.912	3.31984e-06	9.02536e-05	down	NW_018743669.1	900896	907326	+	LOC110683434	--	K02213 cell division control protein 6 | (RefSeq) cell division control protein 6 homolog B-like isoform X1 (A)	cell division control protein 6 homolog B-like isoform X1 [Chenopodium quinoa]	RecName: Full=Cell division control protein 6 homolog B {ECO:0000305}; Short=AtCDC6b {ECO:0000303|PubMed:11752380};	RecName: Full=Cell division control protein {ECO:0000256|PIRNR:PIRNR001767};	Pre-initiation complex, subunit CDC6, AAA+ superfamily ATPase	GO:0005634,nucleus; GO:0007049,cell cycle; GO:0051301,cell division; GO:0006270,DNA replication initiation	AAA domain
gene-LOC110683440	0.19	0.73	0.39	1.65	3.78	1.54	8	31	15	65	156	63	0.236	-2.086	0.000141863	0.00213483	down	NW_018743669.1	939162	942676	+	LOC110683440	--	K01657 anthranilate synthase component I [EC:4.1.3.27] | (RefSeq) anthranilate synthase alpha subunit 2, chloroplastic-like (A)	anthranilate synthase alpha subunit 2, chloroplastic-like [Chenopodium quinoa]	RecName: Full=Anthranilate synthase alpha subunit 2, chloroplastic; EC=4.1.3.27; AltName: Full=Anthranilate synthase component 1-2; AltName: Full=Anthranilate synthase component I-2; Flags: Precursor;	SubName: Full=Uncharacterized protein {ECO:0000313|EMBL:KNA24153.1};	Isochorismate synthase	GO:0005950,anthranilate synthase complex; GO:0009507,chloroplast; GO:0004049,anthranilate synthase activity; GO:0000162,tryptophan biosynthetic process	chorismate binding enzyme
gene-LOC110683450	11.51	2.29	2.13	1.48	0.81	2.34	977	190	159	115	66	189	4.51	2.173	0.00238515	0.0198381	up	NW_018743669.1	1007804	1013341	-	LOC110683450	--	K11778 ditrans,polycis-polyprenyl diphosphate synthase [EC:2.5.1.87] | (RefSeq) LOW QUALITY PROTEIN: dehydrodolichyl diphosphate synthase 2-like (A)	LOW QUALITY PROTEIN: dehydrodolichyl diphosphate synthase 2-like [Chenopodium quinoa]	RecName: Full=Dehydrodolichyl diphosphate synthase 2; Short=Dedol-PP synthase 2; EC=2.5.1.-;	RecName: Full=Alkyl transferase {ECO:0000256|RuleBase:RU363018}; EC=2.5.1.- {ECO:0000256|RuleBase:RU363018};	Cis-prenyltransferase	GO:0009507,chloroplast; GO:0009570,chloroplast stroma; GO:0005829,cytosol; GO:0002094,polyprenyltransferase activity; GO:0009668,plastid membrane organization; GO:0016094,polyprenol biosynthetic process; GO:0006486,protein glycosylation	Putative undecaprenyl diphosphate synthase
gene-LOC110683451	2.04	1.6	1.08	0.78	0.4	0.97	124	95	58	43	23	56	2.759	1.464	0.00333826	0.0257793	up	NW_018743669.1	1000795	1009009	+	LOC110683451	--	--	RING finger protein 141-like [Chenopodium quinoa]	RecName: Full=E3 ubiquitin-protein ligase AIRP2 {ECO:0000305}; EC=2.3.2.27 {ECO:0000269|PubMed:21969385}; AltName: Full=Protein ABA INSENSITIVE RING PROTEIN 2 {ECO:0000303|PubMed:21969385}; Short=AtAIRP2 {ECO:0000303|PubMed:21969385}; AltName: Full=RING-type E3 ubiquitin transferase AIRP2 {ECO:0000305};	SubName: Full=Uncharacterized protein {ECO:0000313|EMBL:KNA25908.1};	Predicted E3 ubiquitin ligase	GO:0005829,cytosol; GO:0061630,ubiquitin protein ligase activity; GO:0009737,response to abscisic acid; GO:0009651,response to salt stress; GO:0006511,ubiquitin-dependent protein catabolic process	Ring finger domain
gene-LOC110683457	1.95	1.39	1.25	0.46	0.97	0.66	133	93	75	29	63	43	2.837	1.504	0.000208779	0.00291126	up	NW_018743669.1	1052668	1057347	+	LOC110683457	--	K19517 1D-myo-inositol 3-kinase [EC:2.7.1.64] | (RefSeq) inositol 3-kinase-like (A)	inositol 3-kinase-like [Chenopodium quinoa]	RecName: Full=Inositol 3-kinase {ECO:0000305}; EC=2.7.1.64 {ECO:0000250|UniProtKB:Q5GA22}; AltName: Full=Myo-inositol kinase {ECO:0000305}; Short=AtMIK {ECO:0000303|PubMed:21698461};	SubName: Full=Uncharacterized protein {ECO:0000313|EMBL:KNA25918.1};	Ribokinase	GO:0005524,ATP binding; GO:0019140,inositol 3-kinase activity; GO:0010264,myo-inositol hexakisphosphate biosynthetic process	pfkB family carbohydrate kinase
gene-LOC110683461	0	0	0	0.15	0.45	0.07	0	0	0	6	19	3	0.026	-5.278	0.00326291	0.0253587	down	NW_018743669.1	1079720	1083266	+	LOC110683461	--	--	uncharacterized protein LOC110683461 [Chenopodium quinoa]	--	SubName: Full=Uncharacterized protein {ECO:0000313|EMBL:KNA16618.1};	--	GO:0016021,integral component of membrane	Domain of unknown function (DUF4793)
gene-LOC110683475	0.07	0.21	0.19	0.73	0.82	0.47	4	12	10	39	46	26	0.289	-1.791	0.0017318	0.0155762	down	NW_018743669.1	1206634	1210477	+	LOC110683475	--	--	uncharacterized protein LOC110683475 [Chenopodium quinoa]	--	SubName: Full=Uncharacterized protein {ECO:0000313|EMBL:KNA02872.1};	--	--	--
gene-LOC110683476	4.55	6.61	5.92	0.41	0.79	0.76	145	206	166	12	24	23	10.846	3.439	7.53387e-25	3.64414e-22	up	NW_018743669.1	1211000	1213085	-	LOC110683476	--	--	--	--	--	--	--	--
gene-LOC110683481	2.92	2	1.85	7.07	6.55	5.47	211	142	118	467	452	376	0.456	-1.134	0.000237633	0.00323607	down	NW_018743669.1	1287039	1292971	-	LOC110683481	--	K08332 vacuolar protein 8 | (RefSeq) U-box domain-containing protein 44-like (A)	U-box domain-containing protein 44-like [Chenopodium quinoa]	RecName: Full=U-box domain-containing protein 43; EC=2.3.2.27; AltName: Full=Plant U-box protein 43; AltName: Full=RING-type E3 ubiquitin transferase PUB43 {ECO:0000305};	RecName: Full=RING-type E3 ubiquitin transferase {ECO:0000256|SAAS:SAAS00702733}; EC=2.3.2.27 {ECO:0000256|SAAS:SAAS00702733};	FOG: Armadillo/beta-catenin-like repeats	GO:0005886,plasma membrane; GO:0004842,ubiquitin-protein transferase activity	U-box domain
gene-LOC110683502	1.02	4.35	1.26	6.34	8.66	7.4	24	100	26	136	194	165	0.359	-1.48	0.00339194	0.0260588	down	NW_018743669.1	1535099	1538903	+	LOC110683502	--	K03120 transcription initiation factor TFIID TATA-box-binding protein | (RefSeq) TATA-box-binding protein-like isoform X1 (A)	TATA-box-binding protein-like isoform X1 [Chenopodium quinoa]	RecName: Full=TATA-box-binding protein; AltName: Full=TATA sequence-binding protein; Short=TBP; AltName: Full=TATA-binding factor; AltName: Full=TATA-box factor; AltName: Full=Transcription initiation factor TFIID TBP subunit;	SubName: Full=TATA-box-binding protein {ECO:0000313|EMBL:PKA66075.1};	TATA-box binding protein (TBP), component of TFIID and TFIIIB	GO:0005634,nucleus; GO:0003677,DNA binding; GO:0006352,DNA-templated transcription, initiation	Transcription factor TFIID (or TATA-binding protein, TBP)
gene-LOC110683504	0.91	1.96	0.71	0	0	0	26	55	18	0	0	0	215.049	7.749	1.23957e-08	6.09075e-07	up	NW_018743669.1	1549697	1552070	-	LOC110683504	--	K15095 (+)-neomenthol dehydrogenase [EC:1.1.1.208] | (RefSeq) (+)-neomenthol dehydrogenase-like (A)	(+)-neomenthol dehydrogenase-like [Chenopodium quinoa]	RecName: Full=(+)-neomenthol dehydrogenase {ECO:0000303|PubMed:18599651}; EC=1.1.1.- {ECO:0000269|PubMed:21169366}; EC=1.1.1.208 {ECO:0000269|PubMed:18599651}; AltName: Full=Menthone:neomenthol reductase; AltName: Full=Short-chain dehydrogenase/reductase 1; Short=AtSDR1;	SubName: Full=Uncharacterized protein {ECO:0000313|EMBL:KDP42906.1};	Dehydrogenases with different specificities (related to short-chain alcohol dehydrogenases)	GO:0005737,cytoplasm; GO:0047501,(+)-neomenthol dehydrogenase activity; GO:0006952,defense response	short chain dehydrogenase
gene-LOC110683514	5.23	6.94	7.6	3.16	3.37	2.82	158	205	202	87	97	81	2.644	1.403	2.02262e-09	1.16254e-07	up	NW_018743669.1	1602604	1607374	-	LOC110683514	--	K00326 cytochrome-b5 reductase [EC:1.6.2.2] | (RefSeq) NADH--cytochrome b5 reductase 1-like isoform X1 (A)	NADH--cytochrome b5 reductase 1-like isoform X1 [Chenopodium quinoa]	RecName: Full=NADH--cytochrome b5 reductase 1; EC=1.6.2.2;	RecName: Full=NADH-cytochrome b5 reductase {ECO:0000256|RuleBase:RU361226}; EC=1.6.2.2 {ECO:0000256|RuleBase:RU361226};	NADH-cytochrome b-5 reductase	GO:0005783,endoplasmic reticulum; GO:0016021,integral component of membrane; GO:0005741,mitochondrial outer membrane; GO:0009505,plant-type cell wall; GO:0005886,plasma membrane; GO:0004128,cytochrome-b5 reductase activity, acting on NAD(P)H; GO:0022900,electron transport chain	Oxidoreductase FAD-binding domain
gene-LOC110683530	2.99	5.46	5.04	12.25	23.4	8.15	126	225	187	471	940	326	0.392	-1.352	0.000243768	0.0033003	down	NW_018743669.1	1729228	1733282	+	LOC110683530	--	K05349 beta-glucosidase [EC:3.2.1.21] | (RefSeq) uncharacterized protein LOC110683530 (A)	uncharacterized protein LOC110683530 [Chenopodium quinoa]	RecName: Full=Beta-xylosidase/alpha-L-arabinofuranosidase 2 {ECO:0000303|PubMed:17615411, ECO:0000312|EMBL:ABQ45228.1}; AltName: Full=Xylan 1,4-beta-xylosidase/Alpha-L-arabinofuranosidase 2; Short=MsXyl2 {ECO:0000303|PubMed:17615411}; Includes: RecName: Full=Beta-xylosidase; EC=3.2.1.37; AltName: Full=1,4-beta-D-xylan xylohydrolase {ECO:0000250|UniProtKB:P48792}; AltName: Full=Xylan 1,4-beta-xylo…	SubName: Full=Uncharacterized protein {ECO:0000313|EMBL:KNA21260.1};	--	GO:0005578,NA; GO:0046556,alpha-L-arabinofuranosidase activity; GO:0009044,xylan 1,4-beta-xylosidase activity; GO:0045493,xylan catabolic process	Glycosyl hydrolase family 3 N terminal domain
gene-LOC110683539	0.65	1.28	0.81	2.26	5.82	1.54	63	121	69	200	538	142	0.365	-1.455	0.00180774	0.0160872	down	NW_018743669.1	1849916	1861214	+	LOC110683539	--	K10400 kinesin family member 15 | (RefSeq) kinesin-like protein KIN-12E isoform X1 (A)	kinesin-like protein KIN-12E isoform X1 [Chenopodium quinoa]	RecName: Full=Kinesin-like protein KIN-12E {ECO:0000305};	SubName: Full=Uncharacterized protein {ECO:0000313|EMBL:KNA12210.1};	Kinesin-like protein	GO:0005871,kinesin complex; GO:0005874,microtubule; GO:0005524,ATP binding; GO:0016887,ATPase activity; GO:0008017,microtubule binding; GO:0003777,microtubule motor activity; GO:0007018,microtubule-based movement	Kinesin motor domain
gene-LOC110683564	6.85	3.77	2.78	1.8	1.49	1.71	308	166	110	74	64	73	3.461	1.791	5.80414e-05	0.00102696	up	NW_018743669.1	2162193	2164609	-	LOC110683564	--	--	protein FAF-like, chloroplastic [Chenopodium quinoa]	RecName: Full=Protein FAF-like, chloroplastic; Flags: Precursor;	SubName: Full=Uncharacterized protein {ECO:0000313|EMBL:KNA23389.1};	--	GO:0009507,chloroplast	Fantastic Four meristem regulator
gene-LOC110683569	0.13	0.58	1.18	0	0	0	4	17	31	0	0	0	116.776	6.868	1.54574e-05	0.000337067	up	NW_018743669.1	2252608	2255668	-	LOC110683569	--	K13484 5-hydroxyisourate hydrolase / 2-oxo-4-hydroxy-4-carboxy-5-ureidoimidazoline decarboxylase [EC:3.5.2.17 4.1.1.97] | (RefSeq) L10-interacting MYB domain-containing protein-like (A)	L10-interacting MYB domain-containing protein-like [Chenopodium quinoa]	RecName: Full=L10-interacting MYB domain-containing protein {ECO:0000303|PubMed:25707794};	SubName: Full=Uncharacterized protein {ECO:0000313|EMBL:KNA13501.1};	--	GO:0005634,nucleus; GO:0006355,regulation of transcription, DNA-templated; GO:0006351,transcription, DNA-templated	Myb/SANT-like DNA-binding domain
gene-LOC110683584	1.4	2.09	1.44	4.85	6.83	3.53	65	95	59	206	303	156	0.41	-1.286	1.76903e-05	0.000378447	down	NW_018743669.1	2496329	2502539	+	LOC110683584	--	K06620 transcription factor E2F3 | (RefSeq) transcription factor E2FB-like (A)	transcription factor E2FB-like [Chenopodium quinoa]	RecName: Full=Transcription factor E2FB; AltName: Full=E2F transcription factor-1; Short=AtE2F1;	SubName: Full=Transcription factor (E2F) {ECO:0000313|EMBL:CAC17702.1};	Transcription factor E2F/dimerization partner (TDP)	GO:0005737,cytoplasm; GO:0005634,nucleus; GO:0005667,transcription factor complex; GO:0003677,DNA binding; GO:0003700,DNA-binding transcription factor activity; GO:0046983,protein dimerization activity; GO:0007049,cell cycle; GO:0008284,positive regulation of cell proliferation; GO:0051446,positive regulation of meiotic cell cycle; GO:0045893,positive regulation of transcription, DNA-templated; G…	E2F transcription factor CC-MB domain
gene-LOC110683597	1046.89	861.31	772.52	519.41	436.7	699.79	16215	13064	10541	7348	6457	10298	2.031	1.022	0.000890895	0.00927632	up	NW_018743669.1	2625038	2627034	-	LOC110683597	--	K14332 photosystem I subunit PsaO | (RefSeq) photosystem I subunit O-like (A)	photosystem I subunit O-like [Chenopodium quinoa]	RecName: Full=Photosystem I subunit O; Short=PSI-O; Flags: Precursor;	SubName: Full=Uncharacterized protein {ECO:0000313|EMBL:KNA13155.1};	--	GO:0009507,chloroplast; GO:0009535,chloroplast thylakoid membrane; GO:0016021,integral component of membrane; GO:0009522,photosystem I; GO:0009579,thylakoid; GO:0009768,photosynthesis, light harvesting in photosystem I; GO:0009767,photosynthetic electron transport chain	--
gene-LOC110683636	2.4	3.04	3.04	7.29	7.61	7.39	165	205	184	458	500	483	0.475	-1.075	3.57485e-09	1.94373e-07	down	NW_018743688.1	67002	71770	-	LOC110683636	--	K17604 zinc finger SWIM domain-containing protein 3 | (RefSeq) protein FAR-RED IMPAIRED RESPONSE 1-like (A)	protein FAR1-RELATED SEQUENCE 6-like isoform X1 [Chenopodium quinoa]	RecName: Full=Protein FAR-RED ELONGATED HYPOCOTYL 3;	SubName: Full=Uncharacterized protein {ECO:0000313|EMBL:ONH89763.1};	--	GO:0005634,nucleus; GO:0003700,DNA-binding transcription factor activity; GO:0008270,zinc ion binding; GO:0007623,circadian rhythm; GO:0010018,far-red light signaling pathway; GO:0042753,positive regulation of circadian rhythm; GO:0045893,positive regulation of transcription, DNA-templated; GO:0010017,red or far-red light signaling pathway; GO:0009585,red, far-red light phototransduction; GO:0010…	MULE transposase domain
gene-LOC110683644	0	0.04	0	0.47	0.45	0.68	0	3	0	37	37	56	0.028	-5.183	5.39214e-07	1.83239e-05	down	NW_018743689.1	881670	913389	-	LOC110683644	--	K01303 acylaminoacyl-peptidase [EC:3.4.19.1] | (RefSeq) uncharacterized LOC101311565 (A)	uncharacterized protein LOC110683644 [Chenopodium quinoa]	RecName: Full=Uncharacterized mitochondrial protein AtMg00860; AltName: Full=ORF158;	SubName: Full=Uncharacterized protein {ECO:0000313|EMBL:KOM35206.1};	FOG: Transposon-encoded proteins with TYA, reverse transcriptase, integrase domains in various combinations	GO:0005739,mitochondrion	RNase H-like domain found in reverse transcriptase
gene-LOC110683656	0	0	0	3.36	4.96	4.63	0	0	0	37	57	53	0.005	-7.739	1.73793e-09	1.01615e-07	down	NW_018743689.1	333723	334816	+	LOC110683656	--	--	--	--	--	--	--	--
gene-LOC110683689	13.08	22.78	14.07	5.38	4.83	6.21	173	295	164	65	61	78	3.742	1.904	4.43934e-10	2.90076e-08	up	NW_018743691.1	4150987	4152452	-	LOC110683689	--	--	uncharacterized protein LOC110683689 [Chenopodium quinoa]	--	--	--	--	--
gene-LOC110683697	0	0.09	0	0.57	0.73	0.41	0	2	0	12	16	9	0.065	-3.933	0.00435096	0.0313439	down	NW_018743691.1	229245	230743	-	LOC110683697	--	--	--	--	--	--	--	--
gene-LOC110683707	40.26	68.23	123.37	33.8	35.5	24.16	626	1039	1690	480	527	357	3.083	1.624	1.33403e-05	0.000296455	up	NW_018743691.1	921903	925276	+	LOC110683707	--	K02973 small subunit ribosomal protein S23e | (RefSeq) 40S ribosomal protein S23 (A)	40S ribosomal protein S23 [Chenopodium quinoa]	RecName: Full=40S ribosomal protein S23;	SubName: Full=Uncharacterized protein {ECO:0000313|EMBL:KRG95930.1, ECO:0000313|EnsemblPlants:GLYMA10G05660.1};	40S ribosomal protein S23	GO:0015935,small ribosomal subunit; GO:0003735,structural constituent of ribosome; GO:0006412,translation	Ribosomal protein S12/S23
gene-LOC110683732	22.27	28.2	23.9	10.36	13.03	11.36	838	1039	792	356	468	406	2.686	1.426	3.25883e-19	7.53884e-17	up	NW_018743691.1	2038101	2041156	-	LOC110683732	--	K03231 elongation factor 1-alpha | (RefSeq) elongation factor 1-alpha-like (A)	elongation factor 1-alpha-like [Chenopodium quinoa]	RecName: Full=Elongation factor 1-alpha; Short=EF-1-alpha;	RecName: Full=Elongation factor 1-alpha {ECO:0000256|RuleBase:RU000325};	Translation elongation factor EF-1 alpha/Tu	GO:0005737,cytoplasm; GO:0005622,intracellular; GO:0005525,GTP binding; GO:0003924,GTPase activity; GO:0003746,translation elongation factor activity	Elongation factor Tu GTP binding domain
gene-LOC110683735	0	0	0	1.82	2.67	1.75	0	0	0	86	132	86	0.002	-8.776	1.39823e-12	1.42287e-10	down	NW_018743691.1	2149543	2153288	+	LOC110683735	--	--	--	--	--	--	--	--
gene-LOC110683749	0.1	0.15	0.01	0.43	0.49	0.47	8	12	1	33	39	37	0.233	-2.101	0.00226751	0.0191201	down	NW_018743691.1	2559245	2567217	+	LOC110683749	--	K15078 structure-specific endonuclease subunit SLX1 [EC:3.6.1.-] | (RefSeq) putative disease resistance protein RGA1 (A)	putative disease resistance RPP13-like protein 1 [Chenopodium quinoa]	RecName: Full=Putative disease resistance RPP13-like protein 1;	SubName: Full=Disease resistance protein RGA2, putative {ECO:0000313|EMBL:EEF37064.1}; EC=3.1.3.16 {ECO:0000313|EMBL:EEF37064.1};	Apoptotic ATPase	GO:0005886,plasma membrane; GO:0043531,ADP binding; GO:0005524,ATP binding; GO:0009626,plant-type hypersensitive response; GO:0007165,signal transduction	NB-ARC domain
gene-LOC110683773	0.07	0.31	0.33	1.35	3.78	0.76	5	23	22	94	274	55	0.151	-2.725	4.77863e-05	0.000874165	down	NW_018743691.1	3045365	3052896	+	LOC110683773	--	--	TORTIFOLIA1-like protein 2 isoform X1 [Chenopodium quinoa]	RecName: Full=TORTIFOLIA1-like protein 2 {ECO:0000303|PubMed:15324671};	SubName: Full=Uncharacterized protein {ECO:0000313|EMBL:KNA11318.1};	--	GO:0005874,microtubule; GO:0008017,microtubule binding	HEAT repeat
gene-LOC110683774	0.77	1.55	1.51	2.27	4.72	2.75	37	73	64	100	217	126	0.492	-1.023	0.005864	0.0391757	down	NW_018743691.1	3069015	3075454	-	LOC110683774	--	K00924 kinase [EC:2.7.1.-] | (RefSeq) probable receptor-like protein kinase At3g55450 isoform X1 (A)	probable serine/threonine-protein kinase PBL17 [Chenopodium quinoa]	RecName: Full=Probable serine/threonine-protein kinase PBL17 {ECO:0000305}; EC=2.7.11.1 {ECO:0000305}; AltName: Full=PBS1-like protein 17 {ECO:0000303|PubMed:20413097};	SubName: Full=Uncharacterized protein {ECO:0000313|EMBL:KNA11317.1};	Serine/threonine protein kinase	GO:0005886,plasma membrane; GO:0005524,ATP binding; GO:0004675,transmembrane receptor protein serine/threonine kinase activity; GO:0007166,cell surface receptor signaling pathway; GO:0006952,defense response; GO:0006468,protein phosphorylation	Protein tyrosine kinase
gene-LOC110683776	1.98	1.99	1.32	7.33	9.38	6.08	177	174	104	598	800	516	0.297	-1.751	5.78503e-11	4.53607e-09	down	NW_018743691.1	3135474	3144968	+	LOC110683776	--	K14486 auxin response factor | (RefSeq) auxin response factor 19-like (A)	auxin response factor 19-like isoform X1 [Chenopodium quinoa]	RecName: Full=Auxin response factor 5;	RecName: Full=Auxin response factor {ECO:0000256|RuleBase:RU004561};	--	GO:0005634,nucleus; GO:0003677,DNA binding; GO:0009734,auxin-activated signaling pathway; GO:0006355,regulation of transcription, DNA-templated; GO:0006351,transcription, DNA-templated	Auxin response factor
gene-LOC110683781	0.19	0.17	0.28	0	0	0	7	6	9	0	0	0	50.02	5.644	0.000591737	0.00673365	up	NW_018743691.1	3281397	3287326	+	LOC110683781	--	--	uncharacterized protein LOC110683781 [Chenopodium quinoa]	--	SubName: Full=Uncharacterized protein {ECO:0000313|EMBL:KNA18316.1};	--	GO:0003824,catalytic activity	Orn/Lys/Arg decarboxylase, major domain
gene-LOC110683782	1.19	1.05	1.91	1.12	0.48	0.45	81	70	115	70	31	29	2.532	1.34	0.00705403	0.0449598	up	NW_018743691.1	3294433	3299015	-	LOC110683782	--	K01087 trehalose 6-phosphate phosphatase [EC:3.1.3.12] | (RefSeq) trehalose-phosphate phosphatase A-like (A)	protein KINESIN LIGHT CHAIN-RELATED 2-like [Chenopodium quinoa]	RecName: Full=Protein KINESIN LIGHT CHAIN-RELATED 2 {ECO:0000303|PubMed:23204523}; AltName: Full=Kinesin light chain-like protein 1 {ECO:0000303|Ref.1}; Short=AtKLC1 {ECO:0000303|Ref.1};	SubName: Full=Uncharacterized protein {ECO:0000313|EMBL:KNA17424.1};	Kinesin light chain	GO:0005886,plasma membrane; GO:0009860,pollen tube growth; GO:0031347,regulation of defense response	Tetratricopeptide repeat
gene-LOC110683819	5.05	7.28	10.11	5.25	4.47	3.79	296	418	522	281	250	211	2.063	1.045	0.000292782	0.00383471	up	NW_018743691.1	4044937	4050389	+	LOC110683819	--	--	uncharacterized protein LOC110683819 [Chenopodium quinoa]	--	SubName: Full=Uncharacterized protein {ECO:0000313|EMBL:KNA11713.1};	--	--	Protein of unknown function (DUF3110)
gene-LOC110683821	0.3	0.25	0.31	1.22	2.5	2.11	11	9	10	41	88	74	0.186	-2.424	1.10559e-06	3.40873e-05	down	NW_018743691.1	4060410	4063577	+	LOC110683821	--	--	uncharacterized protein LOC110683821 [Chenopodium quinoa]	--	SubName: Full=Uncharacterized protein {ECO:0000313|EMBL:OWM76593.1};	--	--	FBD
gene-LOC110683851	0	0	0	2.28	2.79	1.79	0	0	0	82	105	67	0.003	-8.522	7.88021e-12	7.21126e-10	down	NW_018743691.1	1270919	1273875	+	LOC110683851	--	K14400 pre-mRNA cleavage complex 2 protein Pcf11 | (RefSeq) LOW QUALITY PROTEIN: uncharacterized protein LOC111982967 (A)	protein MAIN-LIKE 1-like [Chenopodium quinoa]	RecName: Full=Protein MAIN-LIKE 1 {ECO:0000303|PubMed:24635680};	SubName: Full=Uncharacterized protein {ECO:0000313|EMBL:OMO67845.1};	--	GO:0005634,nucleus; GO:0008483,transaminase activity; GO:0016458,gene silencing; GO:0010073,meristem maintenance; GO:0010082,regulation of root meristem growth	Plant mobile domain
gene-LOC110683855	0.22	0.39	0.54	2.01	6.43	1.06	12	21	26	100	334	55	0.158	-2.662	2.6947e-05	0.000538433	down	NW_018742263.1	4518201	4530426	+	LOC110683855	--	K02178 checkpoint serine/threonine-protein kinase [EC:2.7.11.1] | (RefSeq) mitotic checkpoint serine/threonine-protein kinase BUB1-like (A)	mitotic checkpoint serine/threonine-protein kinase BUB1-like [Chenopodium quinoa]	RecName: Full=Mitotic checkpoint serine/threonine-protein kinase BUB1; Short=AtBUB1; EC=2.7.11.1; AltName: Full=Protein BUDDING UNINHIBITED BY BENZYMIDAZOL 1;	SubName: Full=Uncharacterized protein {ECO:0000313|EMBL:KNA10569.1};	Mitotic checkpoint serine/threonine protein kinase	GO:0000778,condensed nuclear chromosome kinetochore; GO:0005524,ATP binding; GO:0004672,protein kinase activity; GO:0004674,protein serine/threonine kinase activity; GO:0051301,cell division; GO:0051754,meiotic sister chromatid cohesion, centromeric; GO:0007094,mitotic spindle assembly checkpoint	Mad3/BUB1 homology region 1
gene-LOC110683862	3.62	4.65	1.95	8.56	13.83	13.25	101	127	48	218	368	351	0.362	-1.467	8.20883e-05	0.0013649	down	NW_018743691.1	1660334	1661701	-	LOC110683862	--	--	--	--	--	--	--	--
gene-LOC110683875	3.78	3.19	3.44	7.54	14.09	6.12	311	257	249	566	1105	478	0.488	-1.034	0.00115924	0.0114374	down	NW_018742263.1	4769814	4775965	+	LOC110683875	--	K16812 targeting protein for Xklp2 | (RefSeq) protein TPX2-like (A)	protein TPX2-like [Chenopodium quinoa]	RecName: Full=Protein TPX2; Short=AtTPX2; AltName: Full=Targeting protein for XKLP2;	SubName: Full=Uncharacterized protein {ECO:0000313|EMBL:KNA13243.1}; Flags: Fragment;	--	GO:0009941,chloroplast envelope; GO:0005874,microtubule; GO:0005654,nucleoplasm; GO:0005634,nucleus; GO:0009524,phragmoplast; GO:0005819,spindle; GO:0008017,microtubule binding; GO:0032147,activation of protein kinase activity; GO:0051301,cell division; GO:0000278,mitotic cell cycle; GO:0090307,mitotic spindle assembly; GO:0060236,regulation of mitotic spindle organization; GO:0051225,spindle ass…	Cell cycle regulated microtubule associated protein
gene-LOC110683892	0	0	0	11.27	13.12	9.34	0	0	0	189	230	163	0.001	-9.722	1.18458e-15	1.83831e-13	down	NW_018743691.1	3325080	3334396	+	LOC110683892	--	K14016 ubiquitin fusion degradation protein 1 | (RefSeq) uncharacterized protein LOC110683892 (A)	uncharacterized protein LOC110683892 [Chenopodium quinoa]	--	SubName: Full=Uncharacterized protein {ECO:0000313|EMBL:KJB47571.1};	Ubiquitin fusion-degradation protein	GO:0006511,ubiquitin-dependent protein catabolic process	Ubiquitin fusion degradation protein UFD1
gene-LOC110683908	0.51	1.6	1.35	4.79	8.24	2.58	20	62	47	173	311	97	0.278	-1.849	0.00016417	0.00238914	down	NW_018742263.1	5198825	5202448	+	LOC110683908	--	K20720 reticulon-4 | (RefSeq) reticulon-like protein B21 (A)	reticulon-like protein B17 isoform X1 [Chenopodium quinoa]	RecName: Full=Reticulon-like protein B18; Short=AtRTNLB18;	RecName: Full=Reticulon-like protein {ECO:0000256|RuleBase:RU363132};	--	GO:0005789,endoplasmic reticulum membrane; GO:0016021,integral component of membrane	Reticulon
gene-LOC110683941	0	0	0	0.37	0.25	0.48	0	0	0	17	12	23	0.013	-6.275	1.88889e-05	0.000399498	down	NW_018743693.1	64495	69607	+	LOC110683941	--	K03283 heat shock 70kDa protein 1/2/6/8 | (RefSeq) heat shock cognate 70 kDa protein 2-like (A)	heat shock cognate 70 kDa protein 2-like [Chenopodium quinoa]	RecName: Full=Heat shock cognate 70 kDa protein;	SubName: Full=heat shock cognate 70 kDa protein 2 {ECO:0000313|RefSeq:XP_008784530.1};	Molecular chaperones HSP70/HSC70, HSP70 superfamily	GO:0005524,ATP binding	Hsp70 protein
gene-LOC110683949	0.17	1.67	0.34	5.03	17.24	6.06	4	38	7	107	383	134	0.095	-3.395	2.77943e-06	7.69732e-05	down	NW_018743697.1	1171583	1173220	-	LOC110683949	--	K01757 strictosidine synthase [EC:4.3.3.2] | (RefSeq) protein STRICTOSIDINE SYNTHASE-LIKE 11-like (A)	protein STRICTOSIDINE SYNTHASE-LIKE 10-like [Chenopodium quinoa]	RecName: Full=Protein STRICTOSIDINE SYNTHASE-LIKE 10 {ECO:0000303|PubMed:10777701}; Short=AtSSL10 {ECO:0000303|PubMed:10777701}; AltName: Full=Strictosidine synthase 8; Short=AtSS8; Flags: Precursor;	SubName: Full=Uncharacterized protein {ECO:0000313|EMBL:KNA19742.1}; Flags: Fragment;	Predicted alkaloid synthase/Surface mucin Hemomucin	GO:0005783,endoplasmic reticulum; GO:0016020,membrane; GO:0009505,plant-type cell wall; GO:0005886,plasma membrane; GO:0009506,plasmodesma; GO:0005773,vacuole; GO:0016788,hydrolase activity, acting on ester bonds; GO:0009058,biosynthetic process	Strictosidine synthase
gene-LOC110683969	0.05	0.29	0.11	1.18	2.9	0.3	1	6	2	23	59	6	0.129	-2.958	0.00366872	0.0275154	down	NW_018743697.1	3449438	3450482	+	LOC110683969	--	K09286 EREBP-like factor | (RefSeq) dehydration-responsive element-binding protein 1B-like (A)	dehydration-responsive element-binding protein 1F-like [Chenopodium quinoa]	RecName: Full=Dehydration-responsive element-binding protein 1F; Short=Protein DREB1F; AltName: Full=Protein C-repeat-binding factor 2; Short=rCBF2;	SubName: Full=Uncharacterized protein {ECO:0000313|EMBL:KNA05652.1};	--	GO:0005634,nucleus; GO:0003677,DNA binding; GO:0003700,DNA-binding transcription factor activity; GO:0006351,transcription, DNA-templated	AP2 domain
gene-LOC110683978	0	0	0	0.29	0.76	0.08	0	0	0	7	19	2	0.026	-5.277	0.00415743	0.0302428	down	NW_018743697.1	4535499	4537943	-	LOC110683978	--	--	--	--	--	--	--	--
gene-LOC110683995	29.92	34.85	32.88	17.42	13.85	18.77	1322	1508	1280	703	584	788	2.422	1.276	2.46591e-08	1.14232e-06	up	NW_018743697.1	61934	67067	-	LOC110683995	--	K18878 BHLH transcription factor Upa20 | (RefSeq) Upa20; transcription factor bHLH137-like (A)	transcription factor bHLH137-like [Chenopodium quinoa]	RecName: Full=Transcription factor bHLH137; AltName: Full=Basic helix-loop-helix protein 137; Short=AtbHLH137; Short=bHLH 137; AltName: Full=Transcription factor EN 89; AltName: Full=bHLH transcription factor bHLH137;	SubName: Full=Uncharacterized protein {ECO:0000313|EMBL:KNA03216.1};	--	GO:0005634,nucleus; GO:0003677,DNA binding; GO:0003700,DNA-binding transcription factor activity; GO:0046983,protein dimerization activity; GO:0009739,response to gibberellin; GO:0006351,transcription, DNA-templated	Helix-loop-helix DNA-binding domain
gene-LOC110684005	1.1	2.2	1.87	3.45	10.46	3.65	67	132	101	193	611	212	0.376	-1.411	0.00133035	0.0127416	down	NW_018743697.1	369048	374470	+	LOC110684005	--	--	--	--	--	--	--	--
gene-LOC110684012	0.6	0.26	0.46	0.03	0.08	0.16	24	10	16	1	3	6	6.332	2.663	0.00291627	0.0232594	up	NW_018742263.1	6372494	6376047	+	LOC110684012	--	--	--	--	--	--	--	--
gene-LOC110684039	9.36	7.27	5.66	1.12	4.1	1.35	540	411	288	59	226	74	4.51	2.173	5.12847e-06	0.000131731	up	NW_018743697.1	922058	924889	-	LOC110684039	--	K14494 DELLA protein | (RefSeq) DELLA protein GAI-like (A)	scarecrow-like protein 30 [Chenopodium quinoa]	RecName: Full=Scarecrow-like protein 33; Short=AtSCL33; AltName: Full=GRAS family protein 12; Short=AtGRAS-12;	SubName: Full=Uncharacterized protein {ECO:0000313|EMBL:KNA03676.1}; Flags: Fragment;	--	GO:0005634,nucleus; GO:0003700,DNA-binding transcription factor activity; GO:0043565,sequence-specific DNA binding; GO:0006355,regulation of transcription, DNA-templated; GO:0006351,transcription, DNA-templated	GRAS domain family
gene-LOC110684083	17.28	14.85	9.25	31.53	53.33	34.55	863	726	407	1438	2542	1639	0.448	-1.157	0.000330331	0.00421051	down	NW_018743697.1	1399824	1403170	-	LOC110684083	--	K03283 heat shock 70kDa protein 1/2/6/8 | (RefSeq) probable mediator of RNA polymerase II transcription subunit 37c (A)	probable mediator of RNA polymerase II transcription subunit 37c [Chenopodium quinoa]	RecName: Full=Probable mediator of RNA polymerase II transcription subunit 37c; AltName: Full=Heat shock 70 kDa protein 4; AltName: Full=Heat shock cognate 70 kDa protein 4; AltName: Full=Heat shock cognate protein 70-4; Short=AtHsc70-4; AltName: Full=Heat shock protein 70-4; Short=AtHsp70-4;	SubName: Full=Heat shock protein 70 {ECO:0000313|EMBL:AOZ81415.1};	Molecular chaperones HSP70/HSC70, HSP70 superfamily	GO:0048046,apoplast; GO:0005618,cell wall; GO:0005829,cytosol; GO:0005794,Golgi apparatus; GO:0005739,mitochondrion; GO:0005634,nucleus; GO:0005886,plasma membrane; GO:0005774,vacuolar membrane; GO:0005524,ATP binding; GO:0031625,ubiquitin protein ligase binding; GO:0016567,protein ubiquitination; GO:0006355,regulation of transcription, DNA-templated; GO:0009617,response to bacterium; GO:0046686,…	Hsp70 protein
gene-LOC110684085	0.54	0.59	0.28	2	3.35	1.57	13	14	6	44	77	36	0.264	-1.92	0.000273803	0.00364077	down	NW_018742263.1	6859483	6869867	-	LOC110684085	--	--	--	--	--	--	--	--
gene-LOC110684095	19.4	11.81	11.16	6.52	5.49	7.55	941	561	477	289	254	348	2.765	1.467	4.36057e-05	0.000808006	up	NW_018743697.1	1485772	1493394	+	LOC110684095	--	--	ACT domain-containing protein ACR9-like [Chenopodium quinoa]	RecName: Full=ACT domain-containing protein ACR9 {ECO:0000305}; AltName: Full=Protein ACT DOMAIN REPEATS 9 {ECO:0000303|PubMed:21861936};	SubName: Full=Uncharacterized protein {ECO:0000313|EMBL:KNA21710.1};	--	--	ACT domain
gene-LOC110684102	33.01	65.13	60.31	150.19	401.12	84.03	487	941	784	2024	5650	1178	0.321	-1.638	0.000527818	0.00613559	down	NW_018743697.1	1593577	1594300	-	LOC110684102	--	K11252 histone H2B | (RefSeq) probable histone H2B.1 (A)	PREDICTED: probable histone H2B.1 isoform X1 [Beta vulgaris subsp. vulgaris]	RecName: Full=Histone H2B.11;	RecName: Full=Histone H2B {ECO:0000256|RuleBase:RU000451};	Histone H2B	GO:0000786,nucleosome; GO:0005634,nucleus; GO:0003677,DNA binding; GO:0046982,protein heterodimerization activity	Core histone H2A/H2B/H3/H4
gene-LOC110684104	20.12	62.02	77.53	209.64	749.79	139.33	319	963	1083	3036	11349	2099	0.186	-2.424	3.24206e-05	0.000629237	down	NW_018743697.1	1616575	1617506	+	LOC110684104	--	K11251 histone H2A | (RefSeq) histone H2A-like (A)	histone H2A-like [Chenopodium quinoa]	RecName: Full=Histone H2A;	RecName: Full=Histone H2A {ECO:0000256|RuleBase:RU003767};	Histone 2A	GO:0000786,nucleosome; GO:0005634,nucleus; GO:0003677,DNA binding; GO:0046982,protein heterodimerization activity	C-terminus of histone H2A
gene-LOC110684106	46.36	86.92	85.48	160.85	451.2	105.49	1129	2073	1834	3578	10490	2441	0.393	-1.348	0.00301298	0.0238237	down	NW_018743697.1	1627120	1631360	-	LOC110684106	--	K11252 histone H2B | (RefSeq) probable histone H2B.1 (A)	PREDICTED: probable histone H2B.1 isoform X1 [Beta vulgaris subsp. vulgaris]	RecName: Full=Probable histone H2B.1;	RecName: Full=Histone H2B {ECO:0000256|RuleBase:RU000451};	Histone H2B	GO:0000786,nucleosome; GO:0005634,nucleus; GO:0003677,DNA binding; GO:0046982,protein heterodimerization activity	Core histone H2A/H2B/H3/H4
gene-LOC110684110	0.29	0.4	0.46	1.17	2.42	1.06	15	20	21	55	119	52	0.315	-1.666	0.000263643	0.00352454	down	NW_018743697.1	1665218	1667744	+	LOC110684110	--	K03452 magnesium/proton exchanger | (RefSeq) uncharacterized LOC18613571 (A)	pentatricopeptide repeat-containing protein At5g66520-like isoform X1 [Chenopodium quinoa]	RecName: Full=Pentatricopeptide repeat-containing protein At5g66520;	SubName: Full=Uncharacterized protein {ECO:0000313|EMBL:KNA11900.1};	FOG: PPR repeat	GO:0009507,chloroplast; GO:0004519,endonuclease activity; GO:0003723,RNA binding; GO:0008270,zinc ion binding; GO:1900865,chloroplast RNA modification; GO:0016554,cytidine to uridine editing	PPR repeat
gene-LOC110684121	1.73	1.94	1.11	0.47	0.96	0.7	60	66	34	15	32	23	2.85	1.511	0.000775117	0.00833407	up	NW_018743697.1	1763162	1765570	+	LOC110684121	--	--	uncharacterized protein LOC110684121 [Chenopodium quinoa]	--	SubName: Full=Uncharacterized protein {ECO:0000313|EMBL:KNA05913.1};	--	--	Protein of unknown function (DUF1635)
gene-LOC110684122	7.97	5.78	5.08	2.45	2.47	4.82	324	230	182	91	96	186	2.431	1.282	0.00220936	0.0187747	up	NW_018743697.1	1778719	1781754	-	LOC110684122	--	K14652 3,4-dihydroxy 2-butanone 4-phosphate synthase / GTP cyclohydrolase II [EC:4.1.99.12 3.5.4.25] | (RefSeq) monofunctional riboflavin biosynthesis protein RIBA 3, chloroplastic-like isoform X1 (A)	monofunctional riboflavin biosynthesis protein RIBA 3, chloroplastic-like isoform X1 [Chenopodium quinoa]	RecName: Full=Monofunctional riboflavin biosynthesis protein RIBA 3, chloroplastic; Includes: RecName: Full=Inactive 3,4-dihydroxy-2-butanone 4-phosphate synthase; Short=DHBP synthase; Includes: RecName: Full=GTP cyclohydrolase-2; EC=3.5.4.25; AltName: Full=GTP cyclohydrolase II; Flags: Precursor;	SubName: Full=Uncharacterized protein {ECO:0000313|EMBL:KNA17775.1};	Bifunctional GTP cyclohydrolase II/3,4-dihydroxy-2butanone-4-phosphate synthase	GO:0009507,chloroplast; GO:0008686,3,4-dihydroxy-2-butanone-4-phosphate synthase activity; GO:0005525,GTP binding; GO:0003935,GTP cyclohydrolase II activity; GO:0046872,metal ion binding; GO:0009231,riboflavin biosynthetic process	GTP cyclohydrolase II
gene-LOC110684139	0.2	0.49	0.35	0.93	1.53	1.15	6	14	9	25	43	32	0.358	-1.482	0.0062658	0.0411224	down	NW_018743697.1	1885531	1889650	+	LOC110684139	--	--	nudix hydrolase 9-like [Chenopodium quinoa]	RecName: Full=Nudix hydrolase 9; Short=AtNUDT9; EC=3.6.1.-;	SubName: Full=Nudix hydrolase 9 {ECO:0000313|EMBL:EXC35080.1};	--	GO:0052751,GDP-mannose hydrolase activity; GO:0046872,metal ion binding; GO:0071242,cellular response to ammonium ion	NUDIX domain
gene-LOC110684162	40.87	29.79	30.53	23.71	12.85	25.85	1506	1075	991	798	452	905	2.029	1.021	0.0062644	0.0411205	up	NW_018743697.1	2192954	2197566	+	LOC110684162	--	--	shewanella-like protein phosphatase 1 isoform X1 [Chenopodium quinoa]	RecName: Full=Shewanella-like protein phosphatase 1 {ECO:0000303|PubMed:21976480}; Short=AtSLP1 {ECO:0000303|PubMed:21976480}; EC=3.1.-.- {ECO:0000305}; Flags: Precursor;	SubName: Full=Uncharacterized protein {ECO:0000313|EMBL:KNA08919.1};	Serine/threonine specific protein phosphatase PP1, catalytic subunit	GO:0009507,chloroplast; GO:0030145,manganese ion binding; GO:0016791,phosphatase activity; GO:0004721,phosphoprotein phosphatase activity	Calcineurin-like phosphoesterase
gene-LOC110684166	5352.42	5697.78	7162.86	3458.13	3502.43	4265.81	107773	112348	127058	63598	67323	81608	2.023	1.016	4.3719e-06	0.000114751	up	NW_018743697.1	2210916	2211903	-	LOC110684166	--	K08912 light-harvesting complex II chlorophyll a/b binding protein 1 | (RefSeq) chlorophyll a-b binding protein, chloroplastic (A)	chlorophyll a-b binding protein, chloroplastic [Chenopodium quinoa]	RecName: Full=Chlorophyll a-b binding protein, chloroplastic; AltName: Full=LHCII type I CAB; Short=LHCP; Flags: Precursor;	RecName: Full=Chlorophyll a-b binding protein, chloroplastic {ECO:0000256|RuleBase:RU363080};	--	GO:0009535,chloroplast thylakoid membrane; GO:0016021,integral component of membrane; GO:0009522,photosystem I; GO:0009523,photosystem II; GO:0016168,chlorophyll binding; GO:0046872,metal ion binding; GO:0009765,photosynthesis, light harvesting; GO:0018298,protein-chromophore linkage	Chlorophyll A-B binding protein
gene-LOC110684184	0.06	0.09	0.17	0.77	2.04	0.74	2	3	5	23	64	23	0.117	-3.094	5.97655e-05	0.00105147	down	NW_018743697.1	2321710	2323323	-	LOC110684184	--	K13413 mitogen-activated protein kinase kinase 4/5 [EC:2.7.12.2] | (RefSeq) mitogen-activated protein kinase kinase 5-like (A)	protein LIGHT-DEPENDENT SHORT HYPOCOTYLS 5-like [Spinacia oleracea]	RecName: Full=Protein LIGHT-DEPENDENT SHORT HYPOCOTYLS 6; AltName: Full=Protein ORGAN BOUNDARY 6;	SubName: Full=Uncharacterized protein {ECO:0000313|EMBL:OAY24197.1};	--	GO:0005634,nucleus; GO:0003677,DNA binding; GO:0009299,mRNA transcription; GO:0007275,multicellular organism development; GO:0090698,post-embryonic plant morphogenesis; GO:0006355,regulation of transcription, DNA-templated; GO:0009416,response to light stimulus	Protein of unknown function (DUF640)
gene-LOC110684200	1.17	2.6	1.9	4.95	4.81	4.6	32	70	46	124	126	120	0.486	-1.04	0.00131523	0.0126317	down	NW_018743697.1	2477557	2479728	-	LOC110684200	--	K10268 F-box and leucine-rich repeat protein 2/20 | (RefSeq) F-box/LRR-repeat protein 3-like (A)	F-box/LRR-repeat protein 3-like [Chenopodium quinoa]	RecName: Full=F-box/LRR-repeat protein 3;	SubName: Full=Uncharacterized protein {ECO:0000313|EMBL:KNA04750.1};	Leucine rich repeat proteins, some proteins contain F-box	--	Leucine Rich repeat
gene-LOC110684212	0.15	0.15	0.13	0.99	1.39	0.4	4	4	3	24	35	10	0.202	-2.307	0.00349639	0.0266187	down	NW_018743697.1	2573468	2575465	+	LOC110684212	--	K00430 peroxidase [EC:1.11.1.7] | (RefSeq) peroxidase P7-like (A)	peroxidase P7-like [Chenopodium quinoa]	RecName: Full=Peroxidase 4 {ECO:0000250|UniProtKB:Q42578}; EC=1.11.1.7; Flags: Precursor;	RecName: Full=Peroxidase {ECO:0000256|RuleBase:RU362060, ECO:0000256|SAAS:SAAS00709852}; EC=1.11.1.7 {ECO:0000256|RuleBase:RU362060, ECO:0000256|SAAS:SAAS00709852}; Flags: Fragment;	--	GO:0005576,extracellular region; GO:0020037,heme binding; GO:0046872,metal ion binding; GO:0004601,peroxidase activity; GO:0042744,hydrogen peroxide catabolic process; GO:0006979,response to oxidative stress	Peroxidase
gene-LOC110684217	1.61	2.99	0.8	7.09	14.27	5.95	39	71	17	157	330	137	0.252	-1.99	5.91059e-05	0.00104184	down	NW_018743697.1	2629841	2632216	-	LOC110684217	--	--	EPIDERMAL PATTERNING FACTOR-like protein 2 [Chenopodium quinoa]	RecName: Full=EPIDERMAL PATTERNING FACTOR-like protein 6 {ECO:0000303|PubMed:19435754}; Short=EPF-like protein 6; Contains: RecName: Full=CHALLAH {ECO:0000303|PubMed:22027592}; Flags: Precursor;	SubName: Full=Uncharacterized protein {ECO:0000313|EMBL:KNA13803.1}; Flags: Fragment;	--	GO:0005576,extracellular region; GO:0010052,guard cell differentiation; GO:0010374,stomatal complex development	Epidermal patterning factor proteins
gene-LOC110684234	3.28	4.45	3.16	9.25	10.79	9.42	165	219	140	425	518	450	0.463	-1.11	2.12801e-08	1.00709e-06	down	NW_018743697.1	2837068	2841819	+	LOC110684234	--	K20642 Rho GTPase-activating protein 22/24/25 | (Kazusa) Lj3g3v1182350.2; - (A)	rho GTPase-activating protein 5-like [Chenopodium quinoa]	RecName: Full=Rho GTPase-activating protein 1; AltName: Full=Rho-type GTPase-activating protein 1;	SubName: Full=Uncharacterized protein {ECO:0000313|EMBL:KNA13592.1};	GTPase-activator protein	GO:0005096,GTPase activator activity; GO:0007165,signal transduction	RhoGAP domain
gene-LOC110684241	17.66	14.28	5.82	36.89	38.9	31.02	758	600	220	1446	1594	1265	0.455	-1.135	0.00560037	0.0378902	down	NW_018743697.1	2899149	2905289	-	LOC110684241	--	K19891 glucan endo-1,3-beta-glucosidase 1/2/3 [EC:3.2.1.39] | (RefSeq) hypothetical protein (A)	glucan endo-1,3-beta-glucosidase 14-like [Chenopodium quinoa]	RecName: Full=Glucan endo-1,3-beta-glucosidase 14; EC=3.2.1.39; AltName: Full=(1->3)-beta-glucan endohydrolase 14; Short=(1->3)-beta-glucanase 14; AltName: Full=Beta-1,3-endoglucanase 14; Short=Beta-1,3-glucanase 14; Flags: Precursor;	SubName: Full=Uncharacterized protein {ECO:0000313|EMBL:KNA04118.1};	--	GO:0046658,anchored component of plasma membrane; GO:0005618,cell wall; GO:0005737,cytoplasm; GO:0005576,extracellular region; GO:0005634,nucleus; GO:0042973,glucan endo-1,3-beta-D-glucosidase activity; GO:0004553,hydrolase activity, hydrolyzing O-glycosyl compounds; GO:0030247,polysaccharide binding; GO:0005975,carbohydrate metabolic process; GO:0071555,cell wall organization; GO:0006952,defense…	Glycosyl hydrolases family 17
gene-LOC110684270	0	0	0	0.22	0.59	0.08	0	0	0	8	22	3	0.022	-5.517	0.00159496	0.014651	down	NW_018743697.1	3179311	3185773	+	LOC110684270	--	K13356 alcohol-forming fatty acyl-CoA reductase [EC:1.2.1.84] | (RefSeq) alcohol-forming fatty acyl-CoA reductase-like (A)	alcohol-forming fatty acyl-CoA reductase-like [Chenopodium quinoa]	RecName: Full=Alcohol-forming fatty acyl-CoA reductase; EC=1.2.1.84;	RecName: Full=Fatty acyl-CoA reductase {ECO:0000256|RuleBase:RU363097}; EC=1.2.1.84 {ECO:0000256|RuleBase:RU363097};	Acyl-CoA reductase	GO:0102965,alcohol-forming fatty acyl-CoA reductase activity; GO:0080019,fatty-acyl-CoA reductase (alcohol-forming) activity; GO:0006629,lipid metabolic process	Male sterility protein
gene-LOC110684277	0.54	1.26	1.07	3.56	6.91	3.18	80	183	139	481	977	448	0.264	-1.923	5.99129e-08	2.5857e-06	down	NW_018743697.1	3300694	3322978	-	LOC110684277	--	K02324 DNA polymerase epsilon subunit 1 [EC:2.7.7.7] | (RefSeq) LOW QUALITY PROTEIN: DNA polymerase epsilon catalytic subunit A-like (A)	LOW QUALITY PROTEIN: DNA polymerase epsilon catalytic subunit A-like [Chenopodium quinoa]	RecName: Full=DNA polymerase epsilon catalytic subunit A; EC=2.7.7.7; AltName: Full=DNA polymerase 2 a; Short=AtPOL2a; AltName: Full=DNA polymerase II subunit a; AltName: Full=Protein ABA OVERLY SENSITIVE a; AltName: Full=Protein EARLY IN SHORT DAYS 7; AltName: Full=Protein EMBRYO DEFECTIVE 142; AltName: Full=Protein EMBRYO DEFECTIVE 2284; AltName: Full=Protein EMBRYO DEFECTIVE 529; AltName: Full…	SubName: Full=Uncharacterized protein {ECO:0000313|EMBL:KNA12254.1};	DNA polymerase epsilon, catalytic subunit A	GO:0048046,apoplast; GO:0008622,epsilon DNA polymerase complex; GO:0051539,4 iron, 4 sulfur cluster binding; GO:0003677,DNA binding; GO:0003887,DNA-directed DNA polymerase activity; GO:0000166,nucleotide binding; GO:0008310,single-stranded DNA 3'-5' exodeoxyribonuclease activity; GO:0008270,zinc ion binding; GO:0006287,base-excision repair, gap-filling; GO:0045004,DNA replication proofreading; GO…	Domain of unknown function (DUF1744)
gene-LOC110684283	23.87	28.41	39.48	104.79	100.82	72.37	857	999	1249	3437	3456	2469	0.414	-1.271	1.55212e-07	6.05325e-06	down	NW_018743697.1	3363009	3365465	+	LOC110684283	--	--	probable inactive patatin-like protein 9 [Chenopodium quinoa]	RecName: Full=Probable inactive patatin-like protein 9; Short=AtPLP9; AltName: Full=Patatin-related phospholipase A IIIdelta; Short=pPLAIIId; AltName: Full=Phospholipase A IIIB; Short=AtPLAIIIB;	RecName: Full=Patatin {ECO:0000256|RuleBase:RU361262}; EC=3.1.1.- {ECO:0000256|RuleBase:RU361262};	Ca2+-independent phospholipase A2	GO:0016787,hydrolase activity; GO:0016042,lipid catabolic process	Patatin-like phospholipase
gene-LOC110684285	0.6	0.52	0.42	0	0	0	13	11	8	0	0	0	72.1	6.172	4.80259e-05	0.000876826	up	NW_018742271.1	559588	561172	+	LOC110684285	--	K14510 serine/threonine-protein kinase CTR1 [EC:2.7.11.1] | (RefSeq) serine/threonine-protein kinase CTR1-like (A)	mitogen-activated protein kinase kinase kinase 12-like [Chenopodium quinoa]	RecName: Full=Serine/threonine-protein kinase STY46 {ECO:0000305}; EC=2.7.11.1 {ECO:0000269|PubMed:17090544}; AltName: Full=Serine/threonine/tyrosine-protein kinase 46 {ECO:0000303|PubMed:16429265};	SubName: Full=Uncharacterized protein {ECO:0000313|EMBL:KNA25892.1};	Tyrosine kinase specific for activated (GTP-bound) p21cdc42Hs	GO:0005829,cytosol; GO:0005524,ATP binding; GO:0004674,protein serine/threonine kinase activity; GO:0004712,protein serine/threonine/tyrosine kinase activity; GO:0004871,NA; GO:0009658,chloroplast organization; GO:0035556,intracellular signal transduction	Protein tyrosine kinase
gene-LOC110684309	1.79	2.56	4.86	8.42	17.47	7.07	70	98	167	300	651	262	0.356	-1.489	0.000572233	0.00655577	down	NW_018743697.1	3567517	3575860	+	LOC110684309	--	K10752 histone-binding protein RBBP4 | (RefSeq) WD-40 repeat-containing protein MSI4-like (A)	WD-40 repeat-containing protein MSI4-like [Chenopodium quinoa]	RecName: Full=WD-40 repeat-containing protein MSI4; AltName: Full=Altered cold-responsive gene 1 protein;	SubName: Full=Uncharacterized protein {ECO:0000313|EMBL:KNA10670.1};	Nucleosome remodeling factor, subunit CAF1/NURF55/MSI1	GO:0080008,Cul4-RING E3 ubiquitin ligase complex; GO:0005737,cytoplasm; GO:0005829,cytosol; GO:0005730,nucleolus; GO:0005634,nucleus; GO:0046872,metal ion binding; GO:0030154,cell differentiation; GO:0016569,covalent chromatin modification; GO:0006281,DNA repair; GO:0009908,flower development; GO:0006355,regulation of transcription, DNA-templated; GO:0010224,response to UV-B; GO:0006351,transcrip…	Histone-binding protein RBBP4 or subunit C of CAF1 complex
gene-LOC110684313	10.31	48.01	69.27	151.99	181.31	124.21	476	2171	2818	6411	7993	5450	0.34	-1.556	0.00227236	0.0191523	down	NW_018743697.1	3609975	3615470	+	LOC110684313	--	K15403 fatty acid omega-hydroxy dehydrogenase [EC:1.1.-.-] | (RefSeq) protein HOTHEAD-like (A)	protein HOTHEAD-like [Chenopodium quinoa]	RecName: Full=Protein HOTHEAD; AltName: Full=Protein ADHESION OF CALYX EDGES; Flags: Precursor;	SubName: Full=Uncharacterized protein {ECO:0000313|EMBL:KNA09388.1};	Glucose dehydrogenase/choline dehydrogenase/mandelonitrile lyase (GMC oxidoreductase family)	GO:0005576,extracellular region; GO:0050660,flavin adenine dinucleotide binding; GO:0046593,mandelonitrile lyase activity; GO:0016614,oxidoreductase activity, acting on CH-OH group of donors; GO:0007267,cell-cell signaling; GO:0009553,embryo sac development; GO:0010430,fatty acid omega-oxidation	GMC oxidoreductase
gene-LOC110684315	0.02	0.02	0.03	0.18	0.34	0.36	1	1	1	7	14	15	0.104	-3.269	0.00506768	0.0351941	down	NW_018743697.1	3617643	3621766	+	LOC110684315	--	K15403 fatty acid omega-hydroxy dehydrogenase [EC:1.1.-.-] | (RefSeq) protein HOTHEAD-like (A)	protein HOTHEAD-like [Chenopodium quinoa]	RecName: Full=Protein HOTHEAD; AltName: Full=Protein ADHESION OF CALYX EDGES; Flags: Precursor;	SubName: Full=Uncharacterized protein {ECO:0000313|EMBL:KNA07095.1}; Flags: Fragment;	Glucose dehydrogenase/choline dehydrogenase/mandelonitrile lyase (GMC oxidoreductase family)	GO:0005576,extracellular region; GO:0050660,flavin adenine dinucleotide binding; GO:0046593,mandelonitrile lyase activity; GO:0016614,oxidoreductase activity, acting on CH-OH group of donors; GO:0007267,cell-cell signaling; GO:0009553,embryo sac development; GO:0010430,fatty acid omega-oxidation	GMC oxidoreductase
gene-LOC110684341	0.56	1.11	0.54	3.46	6.72	1.62	22	43	19	125	254	61	0.24	-2.059	0.000100002	0.0015994	down	NW_018743697.1	3909017	3911970	-	LOC110684341	--	--	uncharacterized protein LOC110684341 [Chenopodium quinoa]	RecName: Full=Protein IQ-DOMAIN 1 {ECO:0000303|PubMed:15960618};	SubName: Full=Uncharacterized protein {ECO:0000313|EMBL:KNA14572.1};	--	GO:0005737,cytoplasm; GO:0005874,microtubule; GO:0005634,nucleus; GO:0005516,calmodulin binding; GO:0008017,microtubule binding	IQ calmodulin-binding motif
gene-LOC110684350	0.2	0.1	0.03	0	0	0	14	7	2	0	0	0	52.361	5.71	0.00151242	0.0140685	up	NW_018743697.1	4000926	4006221	+	LOC110684350	--	K02218 casein kinase 1 [EC:2.7.11.1] | (RefSeq) uncharacterized protein LOC8069780 (A)	putative nuclease HARBI1 isoform X1 [Chenopodium quinoa]	RecName: Full=Protein ALP1-like {ECO:0000305}; EC=3.1.-.-;	SubName: Full=Uncharacterized protein {ECO:0000313|EnsemblPlants:TRIAE_CS42_3DS_TGACv1_271976_AA0912150.1};	Predicted transposase	GO:0005634,nucleus; GO:0046872,metal ion binding; GO:0004518,nuclease activity	DDE superfamily endonuclease
gene-LOC110684356	1.99	0.74	0.82	6.09	5.07	3.7	69	25	25	193	168	122	0.313	-1.674	0.000878103	0.00917647	down	NW_018743697.1	4112646	4115042	+	LOC110684356	--	K21435 ankyrin repeat domain-containing protein 6 | (RefSeq) ankyrin repeat-containing protein At3g12360-like (A)	ankyrin repeat-containing protein BDA1-like [Chenopodium quinoa]	RecName: Full=Ankyrin repeat-containing protein BDA1 {ECO:0000305}; AltName: Full=Protein BIAN DA 1 {ECO:0000303|PubMed:22740615};	SubName: Full=Uncharacterized protein {ECO:0000313|EMBL:KNA04223.1};	FOG: Ankyrin repeat	GO:0016021,integral component of membrane; GO:0005886,plasma membrane; GO:0045087,innate immune response; GO:0009751,response to salicylic acid	Ankyrin repeats (3 copies)
gene-LOC110684357	0.44	0.75	0.47	1.43	2.82	1.46	17	28	16	50	103	53	0.37	-1.433	0.00109472	0.0109399	down	NW_018743697.1	4133508	4135387	+	LOC110684357	--	K15121 solute carrier family 25, member 44 | (RefSeq) solute carrier family 25 member 44-like (A)	solute carrier family 25 member 44-like [Chenopodium quinoa]	RecName: Full=Probable S-adenosylmethionine carrier 2, chloroplastic; Flags: Precursor;	SubName: Full=Uncharacterized protein {ECO:0000313|EMBL:KNA04222.1};	Predicted mitochondrial carrier protein	GO:0009941,chloroplast envelope; GO:0031969,chloroplast membrane; GO:0016021,integral component of membrane; GO:0005743,mitochondrial inner membrane; GO:0000095,S-adenosyl-L-methionine transmembrane transporter activity; GO:0006839,mitochondrial transport	Mitochondrial carrier protein
gene-LOC110684365	20.32	29.47	37.07	12.08	16.96	15.73	359	510	577	195	286	264	2.415	1.272	1.02712e-06	3.21741e-05	up	NW_018742271.1	136747	138212	-	LOC110684365	--	--	uncharacterized protein At5g01610-like [Chenopodium quinoa]	--	SubName: Full=Uncharacterized protein {ECO:0000313|EMBL:KNA02678.1};	--	--	Protein of unknown function, DUF538
gene-LOC110684376	4.42	3.71	3.57	8.74	10.58	11.08	73	60	52	132	167	174	0.487	-1.037	0.000525787	0.00611967	down	NW_018743697.1	4323733	4328225	+	LOC110684376	--	K08336 ubiquitin-like protein ATG12 | (RefSeq) ubiquitin-like protein ATG12B (A)	ubiquitin-like protein ATG12B [Chenopodium quinoa]	RecName: Full=Ubiquitin-like protein ATG12B; AltName: Full=Autophagy-related protein 12b; Short=APG12-like protein b; Short=AtAPG12b;	RecName: Full=Ubiquitin-like protein ATG12 {ECO:0000256|RuleBase:RU361201};	Protein conjugation factor involved in autophagy	GO:0034274,Atg12-Atg5-Atg16 complex; GO:0034045,phagophore assembly site membrane; GO:0019776,Atg8 ligase activity; GO:0000045,autophagosome assembly; GO:0006914,autophagy; GO:0000422,autophagy of mitochondrion; GO:0044804,autophagy of nucleus; GO:0006501,C-terminal protein lipidation; GO:0015031,protein transport	Ubiquitin-like autophagy protein Apg12
gene-LOC110684377	0.13	0.65	0.81	2.43	7.14	1.22	6	30	34	105	323	55	0.187	-2.421	0.000647496	0.00724414	down	NW_018743697.1	4330393	4334906	+	LOC110684377	--	K09285 AP2-like factor, ANT lineage | (RefSeq) AP2-like ethylene-responsive transcription factor AIL1 (A)	AP2-like ethylene-responsive transcription factor AIL1 [Chenopodium quinoa]	RecName: Full=AP2-like ethylene-responsive transcription factor AIL1; AltName: Full=Protein AINTEGUMENTA-LIKE 1;	SubName: Full=Uncharacterized protein {ECO:0000313|EMBL:KNA18841.1};	--	GO:0005634,nucleus; GO:0003677,DNA binding; GO:0003700,DNA-binding transcription factor activity; GO:0009873,ethylene-activated signaling pathway; GO:0007275,multicellular organism development; GO:0006351,transcription, DNA-templated	AP2 domain
gene-LOC110684386	0.16	0.5	0.28	1.23	1.58	1.53	6	18	9	41	55	53	0.269	-1.894	0.000188843	0.00268453	down	NW_018743697.1	4484059	4486307	-	LOC110684386	--	K20623 typhasterol/6-deoxotyphasterol 2alpha-hydroxylase | (RefSeq) cytochrome P450 71A1-like (A)	cytochrome P450 71A1-like [Chenopodium quinoa]	RecName: Full=Cytochrome P450 71A1; EC=1.14.-.-; AltName: Full=ARP-2; AltName: Full=CYPLXXIA1;	SubName: Full=cytochrome P450 71A1-like {ECO:0000313|RefSeq:XP_010273844.1};	Cytochrome P450 CYP2 subfamily	GO:0005789,endoplasmic reticulum membrane; GO:0016021,integral component of membrane; GO:0031090,organelle membrane; GO:0020037,heme binding; GO:0005506,iron ion binding; GO:0004497,monooxygenase activity; GO:0016705,oxidoreductase activity, acting on paired donors, with incorporation or reduction of molecular oxygen; GO:0009835,fruit ripening	Cytochrome P450
gene-LOC110684388	7.34	24.45	9.19	37.32	43.12	27.95	272	887	300	1263	1525	984	0.462	-1.115	0.00506252	0.035166	down	NW_018743697.1	4497668	4500052	-	LOC110684388	--	K20623 typhasterol/6-deoxotyphasterol 2alpha-hydroxylase | (RefSeq) cytochrome P450 71A1-like (A)	cytochrome P450 71A1-like [Chenopodium quinoa]	RecName: Full=Cytochrome P450 71A1; EC=1.14.-.-; AltName: Full=ARP-2; AltName: Full=CYPLXXIA1;	SubName: Full=Uncharacterized protein {ECO:0000313|EMBL:CCB59282.1};	Cytochrome P450 CYP2 subfamily	GO:0005789,endoplasmic reticulum membrane; GO:0016021,integral component of membrane; GO:0031090,organelle membrane; GO:0020037,heme binding; GO:0005506,iron ion binding; GO:0004497,monooxygenase activity; GO:0016705,oxidoreductase activity, acting on paired donors, with incorporation or reduction of molecular oxygen; GO:0009835,fruit ripening	Cytochrome P450
gene-LOC110684391	24.21	16.88	9.5	58.87	51.44	68.58	1694	1157	586	3763	3437	4560	0.361	-1.47	0.000188644	0.00268271	down	NW_018743697.1	4546974	4553928	-	LOC110684391	--	K00454 lipoxygenase [EC:1.13.11.12] | (RefSeq) linoleate 13S-lipoxygenase 3-1, chloroplastic-like isoform X1 (A)	linoleate 13S-lipoxygenase 3-1, chloroplastic-like isoform X1 [Chenopodium quinoa]	RecName: Full=Linoleate 13S-lipoxygenase 3-1, chloroplastic; EC=1.13.11.12; Flags: Precursor;	RecName: Full=Lipoxygenase {ECO:0000256|RuleBase:RU003975}; EC=1.13.11.- {ECO:0000256|RuleBase:RU003975};	--	GO:0009570,chloroplast stroma; GO:0009534,chloroplast thylakoid; GO:0016165,linoleate 13S-lipoxygenase activity; GO:0046872,metal ion binding; GO:0031408,oxylipin biosynthetic process	Lipoxygenase
gene-LOC110684402	0.46	0.51	0.38	0.09	0.09	0.09	11	12	8	2	2	2	6.38	2.674	0.00440433	0.0316189	up	NW_018743697.1	4643072	4644753	-	LOC110684402	--	K01951 GMP synthase (glutamine-hydrolysing) [EC:6.3.5.2] | (RefSeq) uncharacterized protein LOC110705746 (A)	uncharacterized protein LOC110684402 [Chenopodium quinoa]	--	SubName: Full=Uncharacterized protein {ECO:0000313|EMBL:KNA15850.1};	GMP synthase	GO:0005524,ATP binding; GO:0003922,GMP synthase (glutamine-hydrolyzing) activity; GO:0016462,pyrophosphatase activity; GO:0006177,GMP biosynthetic process	GMP synthase C terminal domain
gene-LOC110684425	3.35	2.2	1.13	5.98	11.02	5.14	81	52	24	132	254	118	0.399	-1.326	0.00660648	0.0427779	down	NW_018743697.1	4985429	4987031	+	LOC110684425	--	K13993 HSP20 family protein | (RefSeq) 17.4 kDa class III heat shock protein-like (A)	17.4 kDa class III heat shock protein-like [Chenopodium quinoa]	RecName: Full=18.6 kDa class III heat shock protein; AltName: Full=18.6 kDa heat shock protein; Short=OsHsp18.6;	SubName: Full=Uncharacterized protein {ECO:0000313|EMBL:KNA07362.1};	Molecular chaperone (small heat-shock protein Hsp26/Hsp42)	GO:0005737,cytoplasm; GO:0009408,response to heat; GO:0009644,response to high light intensity; GO:0042542,response to hydrogen peroxide	Hsp20/alpha crystallin family
gene-LOC110684446	405.12	1146.83	145.13	43.28	127.96	83.01	10659	29548	3364	1040	3214	2075	8.261	3.046	4.63958e-07	1.61496e-05	up	NW_018742271.1	389978	392146	-	LOC110684446	--	--	mannose/glucose-specific lectin-like [Chenopodium quinoa]	RecName: Full=Mannose/glucose-specific lectin; Flags: Fragment;	SubName: Full=Uncharacterized protein {ECO:0000313|EMBL:KNA06854.1};	--	GO:0005536,glucose binding; GO:0005537,mannose binding; GO:0000771,agglutination involved in conjugation	Jacalin-like lectin domain
gene-LOC110684463	7.76	7.67	7.32	5.38	3.65	5.11	278	269	231	176	125	174	2.008	1.005	0.000461461	0.00549812	up	NW_018742271.1	461462	463219	+	LOC110684463	--	K12135 zinc finger protein CONSTANS | (RefSeq) hypothetical protein (A)	nucleolin-like [Chenopodium quinoa]	RecName: Full=B-box zinc finger protein 32 {ECO:0000303|PubMed:19920209}; AltName: Full=EIP6, EMF1-INTERACTING PROTEIN 6;	SubName: Full=Uncharacterized protein {ECO:0000313|EMBL:KNA20983.1};	--	GO:0005737,cytoplasm; GO:0005634,nucleus; GO:0003700,DNA-binding transcription factor activity; GO:0008270,zinc ion binding; GO:0009785,blue light signaling pathway; GO:0045892,negative regulation of transcription, DNA-templated; GO:0009640,photomorphogenesis; GO:0010017,red or far-red light signaling pathway; GO:0009909,regulation of flower development; GO:0006355,regulation of transcription, DN…	B-box zinc finger
gene-LOC110684539	10.38	6.65	6.5	4.29	4.67	3.81	424	266	234	160	182	148	2.378	1.25	0.000107313	0.00170007	up	NW_018743712.1	110884	120449	+	LOC110684539	--	--	uncharacterized protein LOC110684539 [Chenopodium quinoa]	--	SubName: Full=Uncharacterized protein {ECO:0000313|EMBL:KMT17965.1};	--	--	Protein of unknown function (DUF1639)
gene-LOC110684541	0.86	0.04	0.85	0.07	0.02	0.02	40	2	35	3	1	1	19.948	4.318	0.000367344	0.00456362	up	NW_018743712.1	137994	143468	-	LOC110684541	--	K09775 uncharacterized protein | (RefSeq) uncharacterized protein LOC111283728 isoform X1 (A)	uncharacterized protein LOC110684541 [Chenopodium quinoa]	--	SubName: Full=Uncharacterized protein {ECO:0000313|EMBL:KNA05307.1};	--	GO:0016021,integral component of membrane; GO:0008375,acetylglucosaminyltransferase activity	Core-2/I-Branching enzyme
gene-LOC110684569	0.65	0.24	0.22	0	0	0	17	6	5	0	0	0	64.624	6.014	0.000313938	0.00404169	up	NW_018743722.1	1549861	1553815	+	LOC110684569	--	K17500 integrin-linked kinase-associated serine/threonine phosphatase 2C [EC:3.1.3.16] | (RefSeq) WAT1-related protein At3g18200 isoform X1 (A)	WAT1-related protein At2g37460-like isoform X1 [Chenopodium quinoa]	RecName: Full=WAT1-related protein At2g37460;	RecName: Full=WAT1-related protein {ECO:0000256|RuleBase:RU363077};	--	GO:0016021,integral component of membrane; GO:0005886,plasma membrane; GO:0015171,amino acid transmembrane transporter activity; GO:0032973,amino acid export across plasma membrane; GO:0080144,amino acid homeostasis; GO:0043090,amino acid import	EamA-like transporter family
gene-LOC110684575	0.17	0.05	0.08	0.71	0.63	0.48	7	2	3	27	25	19	0.213	-2.228	0.00298753	0.0236846	down	NW_018743722.1	2061940	2068609	+	LOC110684575	--	K14300 nuclear pore complex protein Nup133 | (RefSeq) nuclear pore complex protein NUP133 (A)	uncharacterized protein LOC110684575 [Chenopodium quinoa]	--	SubName: Full=Uncharacterized protein {ECO:0000313|EMBL:KYP61520.1}; Flags: Fragment;	--	--	Transposase family tnp2
gene-LOC110684594	0.06	0.54	0.77	1.86	5.06	2.26	3	25	32	80	227	101	0.186	-2.427	0.000364332	0.00453225	down	NW_018742272.1	507049	509354	+	LOC110684594	--	K06628 cell division control protein 45 | (RefSeq) cell division control protein 45 homolog (A)	cell division control protein 45 homolog [Chenopodium quinoa]	--	SubName: Full=Uncharacterized protein {ECO:0000313|EMBL:KMS96995.1};	CDC45 (cell division cycle 45)-like protein	GO:0006270,DNA replication initiation	CDC45-like protein
gene-LOC110684666	0.18	0.47	0.24	2.97	3.59	1.28	5	13	6	76	96	34	0.144	-2.797	1.96311e-06	5.68998e-05	down	NW_018743732.1	479944	482319	-	LOC110684666	--	K09841 xanthoxin dehydrogenase [EC:1.1.1.288] | (RefSeq) xanthoxin dehydrogenase-like (A)	short-chain dehydrogenase reductase 2a-like [Chenopodium quinoa]	RecName: Full=Short-chain dehydrogenase reductase 2a; Short=AtSDR2a; EC=1.1.1.-;	SubName: Full=Uncharacterized protein {ECO:0000313|EMBL:KNA18268.1};	Reductases with broad range of substrate specificities	GO:0016491,oxidoreductase activity	Enoyl-(Acyl carrier protein) reductase
gene-LOC110684669	34.64	18.56	9.27	65.41	63.88	64.75	1489	781	351	2568	2621	2644	0.42	-1.252	0.00724113	0.0457421	down	NW_018743732.1	497424	500402	+	LOC110684669	--	K13424 WRKY transcription factor 33 | (RefSeq) WRKY transcription factor WRKY24-like (A)	WRKY transcription factor WRKY24-like [Chenopodium quinoa]	RecName: Full=WRKY transcription factor WRKY24 {ECO:0000303|PubMed:16919842}; Short=OsWRKY24 {ECO:0000303|PubMed:16919842};	SubName: Full=Uncharacterized protein {ECO:0000313|EMBL:KNA04751.1};	--	GO:0005634,nucleus; GO:0003700,DNA-binding transcription factor activity; GO:0043565,sequence-specific DNA binding; GO:0009738,abscisic acid-activated signaling pathway; GO:0009740,gibberellic acid mediated signaling pathway; GO:0009788,negative regulation of abscisic acid-activated signaling pathway; GO:0009938,negative regulation of gibberellic acid mediated signaling pathway; GO:0045893,positi…	WRKY DNA -binding domain
gene-LOC110684699	33.29	17.32	24.81	15.61	12.96	14.43	2166	1104	1422	928	805	892	2.251	1.17	0.000568826	0.00652677	up	NW_018742275.1	148258	168110	+	LOC110684699	--	K00700 1,4-alpha-glucan branching enzyme [EC:2.4.1.18] | (RefSeq) 1,4-alpha-glucan-branching enzyme 2-2, chloroplastic/amyloplastic-like (A)	1,4-alpha-glucan-branching enzyme 2-2, chloroplastic/amyloplastic-like [Chenopodium quinoa]	RecName: Full=1,4-alpha-glucan-branching enzyme 1, chloroplastic/amyloplastic; EC=2.4.1.18; AltName: Full=Starch branching enzyme I; Flags: Precursor;	SubName: Full=Uncharacterized protein {ECO:0000313|EMBL:KNA13601.1};	1,4-alpha-glucan branching enzyme/starch branching enzyme II	GO:0009501,amyloplast; GO:0009507,chloroplast; GO:0003844,1,4-alpha-glucan branching enzyme activity; GO:0102752,1,4-alpha-glucan branching enzyme activity (using a glucosylated glycogenin as primer for glycogen synthesis); GO:0043169,cation binding; GO:0004553,hydrolase activity, hydrolyzing O-glycosyl compounds; GO:0009793,embryo development ending in seed dormancy; GO:0005978,glycogen biosynth…	Alpha amylase, C-terminal all-beta domain
gene-LOC110684707	82.48	56.49	69.02	52.1	31.8	44.17	1834	1230	1352	1058	675	933	2.05	1.036	0.00148525	0.0138923	up	NW_018743742.1	229789	230879	-	LOC110684707	--	--	uncharacterized protein LOC110684707 [Chenopodium quinoa]	--	SubName: Full=Uncharacterized protein {ECO:0000313|EMBL:KNA25781.1};	FKBP-type peptidyl-prolyl cis-trans isomerase	--	Chlorophyll A-B binding protein
gene-LOC110684718	0.13	0.28	0.12	0.6	0.88	1.27	7	15	6	30	46	66	0.238	-2.072	0.000412905	0.00503392	down	NW_018743743.1	321474	325235	+	LOC110684718	--	--	protein IQ-DOMAIN 14-like isoform X2 [Chenopodium quinoa]	--	SubName: Full=Uncharacterized protein {ECO:0000313|EMBL:KNA10237.1};	--	--	Protein of unknown function (DUF4005)
gene-LOC110684768	0.1	0.1	0	0.37	2.92	0.81	2	2	0	7	58	16	0.064	-3.96	0.000811976	0.00863812	down	NW_018743783.1	818823	819844	+	LOC110684768	--	--	EPIDERMAL PATTERNING FACTOR-like protein 5 [Chenopodium quinoa]	RecName: Full=EPIDERMAL PATTERNING FACTOR-like protein 5 {ECO:0000303|PubMed:19435754}; Short=EPF-like protein 5; Contains: RecName: Full=CHALLAH-LIKE1 {ECO:0000303|PubMed:21862708}; Flags: Precursor;	SubName: Full=Uncharacterized protein {ECO:0000313|EMBL:KMS97771.1};	--	GO:0005576,extracellular region; GO:0010052,guard cell differentiation; GO:0010374,stomatal complex development	Epidermal patterning factor proteins
gene-LOC110684795	0.27	1.72	1.53	5.64	12.78	3.05	18	114	91	348	824	196	0.205	-2.289	0.000216804	0.00299735	down	NW_018743783.1	343693	349143	+	LOC110684795	--	K11498 centromeric protein E | (RefSeq) kinesin-like protein NACK1 (A)	kinesin-like protein NACK1 [Chenopodium quinoa]	RecName: Full=Kinesin-like protein NACK1; AltName: Full=NPK1-activating kinesin-1;	RecName: Full=Kinesin-like protein {ECO:0000256|RuleBase:RU000394};	Kinesin-like protein	GO:0005874,microtubule; GO:0005634,nucleus; GO:0009524,phragmoplast; GO:0005524,ATP binding; GO:0008017,microtubule binding; GO:0003777,microtubule motor activity; GO:0000919,cell plate assembly; GO:0007018,microtubule-based movement	Kinesin motor domain
gene-LOC110684801	2.43	4.24	2.25	8.34	6.96	7.77	124	212	101	389	339	377	0.476	-1.07	0.000254787	0.00342955	down	NW_018743783.1	711003	727480	+	LOC110684801	--	K13464 jasmonate ZIM domain-containing protein | (RefSeq) hypothetical protein (A)	protein TIFY 4B isoform X1 [Chenopodium quinoa]	RecName: Full=Protein TIFY 4B; AltName: Full=Protein PEAPOD 2;	SubName: Full=Uncharacterized protein {ECO:0000313|EMBL:KNA05166.1};	--	GO:0005634,nucleus; GO:0003714,transcription corepressor activity; GO:0048366,leaf development; GO:1903507,negative regulation of nucleic acid-templated transcription; GO:0031347,regulation of defense response; GO:2000022,regulation of jasmonic acid mediated signaling pathway; GO:0009611,response to wounding	tify domain
gene-LOC110684808	0.77	0.98	1.25	0.52	0.49	0.49	105	130	149	64	64	63	2.492	1.317	4.57946e-06	0.000119441	up	NW_018743783.1	1112009	1120383	+	LOC110684808	--	--	--	--	--	--	--	--
gene-LOC110684818	0	0	0	0.06	0.13	0.14	0	0	0	5	12	13	0.023	-5.444	0.00091672	0.00947919	down	NW_018743783.1	1687241	1692148	+	LOC110684818	--	--	--	--	--	--	--	--
gene-LOC110684819	5.66	10.07	14.63	4.08	4.25	6.99	155	270	353	102	111	182	2.41	1.269	0.00175471	0.0157177	up	NW_018743783.1	1722449	1723792	-	LOC110684819	--	--	uncharacterized protein LOC110684819 [Chenopodium quinoa]	--	SubName: Full=Uncharacterized protein {ECO:0000313|EMBL:KNA03797.1};	--	--	Protein of unknown function (DUF1677)
gene-LOC110684832	0.66	1.13	0.63	1.74	3.04	2.15	19	32	16	46	84	59	0.438	-1.19	0.00443518	0.031767	down	NW_018743783.1	2385977	2387555	-	LOC110684832	--	--	--	--	--	--	--	--
gene-LOC110684840	0.31	0.61	0.62	1.95	6.38	1.78	24	46	42	138	472	131	0.195	-2.361	3.83279e-06	0.000102699	down	NW_018743783.1	2719940	2725829	+	LOC110684840	--	K21776 protein lin-54 | (RefSeq) CRC domain-containing protein TSO1-like (A)	protein tesmin/TSO1-like CXC 2 isoform X1 [Chenopodium quinoa]	RecName: Full=Protein tesmin/TSO1-like CXC 2; Short=AtTCX2; AltName: Full=Protein TSO1-like 2; Short=Protein SOL2;	SubName: Full=Uncharacterized protein {ECO:0000313|EMBL:KNA14172.1};	Metallothionein-like protein	GO:0005634,nucleus; GO:0003700,DNA-binding transcription factor activity; GO:0046872,metal ion binding; GO:0043565,sequence-specific DNA binding; GO:0007275,multicellular organism development; GO:0006355,regulation of transcription, DNA-templated	Tesmin/TSO1-like CXC domain, cysteine-rich domain
gene-LOC110684844	0.03	0.09	0.03	0.6	0.54	0.21	1	3	1	19	18	7	0.139	-2.845	0.00574015	0.038535	down	NW_018743783.1	2814338	2816044	-	LOC110684844	--	K13420 LRR receptor-like serine/threonine-protein kinase FLS2 [EC:2.7.11.1] | (RefSeq) LRR receptor-like serine/threonine-protein kinase FLS2 (A)	leucine-rich repeat extensin-like protein 6 [Chenopodium quinoa]	RecName: Full=Leucine-rich repeat extensin-like protein 6; Short=AtLRX6; Short=LRR/EXTENSIN6; AltName: Full=Cell wall hydroxyproline-rich glycoprotein; Flags: Precursor;	SubName: Full=Uncharacterized protein {ECO:0000313|EMBL:KNA03665.1};	--	GO:0005618,cell wall; GO:0005576,extracellular region; GO:0005199,structural constituent of cell wall; GO:0071555,cell wall organization	Leucine rich repeat
gene-LOC110684849	26.09	20.03	27.38	14.89	11.33	14.74	637	479	589	332	264	342	2.258	1.175	4.61257e-05	0.000847116	up	NW_018743783.1	3201472	3202669	+	LOC110684849	--	--	--	--	--	--	--	--
gene-LOC110684906	0.9	1.69	1.88	0	0.15	0	19	35	35	0	3	0	37.51	5.229	8.11865e-07	2.63167e-05	up	NW_018743787.1	416103	419112	-	LOC110684906	--	--	--	--	--	--	--	--
gene-LOC110684916	4.65	2.64	2.05	1.77	1.86	1.66	144	80	56	50	55	49	2.29	1.195	0.00726424	0.0458182	up	NW_018743787.1	1387167	1391380	-	LOC110684916	--	K17500 integrin-linked kinase-associated serine/threonine phosphatase 2C [EC:3.1.3.16] | (RefSeq) WAT1-related protein At3g18200 isoform X1 (A)	WAT1-related protein At5g40240-like [Chenopodium quinoa]	RecName: Full=WAT1-related protein At5g40230;	RecName: Full=WAT1-related protein {ECO:0000256|RuleBase:RU363077};	--	GO:0016021,integral component of membrane; GO:0005886,plasma membrane; GO:0022857,transmembrane transporter activity	EamA-like transporter family
gene-LOC110684918	8.31	9.77	11.27	0	0	0	298	343	356	0	0	0	2242.66	11.131	2.53822e-20	6.9038e-18	up	NW_018743787.1	1927821	1930605	+	LOC110684918	--	--	--	--	--	--	--	--
gene-LOC110684923	0.09	0.27	0.22	0.78	1.02	0.83	13	38	28	104	141	114	0.269	-1.892	1.03076e-06	3.22611e-05	down	NW_018743787.1	2533682	2548113	-	LOC110684923	--	K03549 KUP system potassium uptake protein | (RefSeq) potassium transporter 19-like (A)	uncharacterized protein LOC110684923 isoform X1 [Chenopodium quinoa]	--	SubName: Full=Uncharacterized protein {ECO:0000313|EMBL:PKA45796.1};	--	--	Transposase-associated domain
gene-LOC110684952	0.4	0.41	0	1.91	1.69	3.1	3	3	0	13	12	22	0.154	-2.699	0.00760176	0.0473378	down	NW_018743791.1	479808	480173	-	LOC110684952	--	--	uncharacterized protein LOC110684952 [Chenopodium quinoa]	--	SubName: Full=Uncharacterized protein {ECO:0000313|EMBL:KJB79466.1};	--	--	--
gene-LOC110684959	7.54	6.4	6.08	1.6	1.92	1.52	490	407	348	95	119	94	5.068	2.341	1.26031e-20	3.72543e-18	up	NW_018743791.1	8423	28932	-	LOC110684959	--	K02154 V-type H+-transporting ATPase subunit a | (RefSeq) V-type proton ATPase subunit a1-like isoform X1 (A)	V-type proton ATPase subunit a1-like isoform X1 [Chenopodium quinoa]	RecName: Full=V-type proton ATPase subunit a1; Short=V-ATPase subunit a1; AltName: Full=V-type proton ATPase 95 kDa subunit a isoform 1; Short=V-ATPase 95 kDa isoform a1; AltName: Full=Vacuolar H(+)-ATPase subunit a isoform 1; AltName: Full=Vacuolar proton pump subunit a1; AltName: Full=Vacuolar proton translocating ATPase 95 kDa subunit a isoform 1;	RecName: Full=V-type proton ATPase subunit a {ECO:0000256|RuleBase:RU361189};	Vacuolar H+-ATPase V0 sector, subunit a	GO:0005768,endosome; GO:0005794,Golgi apparatus; GO:0016021,integral component of membrane; GO:0000325,plant-type vacuole; GO:0005802,trans-Golgi network; GO:0012510,trans-Golgi network transport vesicle membrane; GO:0016471,vacuolar proton-transporting V-type ATPase complex; GO:0000220,vacuolar proton-transporting V-type ATPase, V0 domain; GO:0005773,vacuole; GO:0051117,ATPase binding; GO:004696…	V-type ATPase 116kDa subunit family
gene-LOC110684977	1.47	4.27	4.34	14.6	34.62	9.7	45	128	117	408	1011	282	0.217	-2.207	6.62801e-06	0.000164027	down	NW_018743791.1	249863	252318	+	LOC110684977	--	K21777 G2/mitotic-specific cyclin-B, other | (RefSeq) G2/mitotic-specific cyclin S13-7-like (A)	G2/mitotic-specific cyclin S13-7-like [Chenopodium quinoa]	RecName: Full=G2/mitotic-specific cyclin S13-6; AltName: Full=B-like cyclin;	SubName: Full=Mitotic cyclin {ECO:0000313|EMBL:CAA71243.1};	Cyclin B and related kinase-activating proteins	GO:0005634,nucleus; GO:0007049,cell cycle; GO:0051301,cell division	Cyclin, N-terminal domain
gene-LOC110684987	0	0	0	1.01	1.35	1.5	0	0	0	20	28	31	0.009	-6.851	4.79838e-07	1.65785e-05	down	NW_018742287.1	629673	634093	-	LOC110684987	--	--	--	--	--	--	--	--
gene-LOC110685014	0.49	1.21	0.94	3.04	6.92	1.77	34	82	57	192	456	116	0.287	-1.803	0.000232908	0.0031822	down	NW_018743791.1	681494	685664	+	LOC110685014	--	--	uncharacterized protein LOC110685014 [Chenopodium quinoa]	--	SubName: Full=Uncharacterized protein {ECO:0000313|EMBL:KNA09351.1};	--	GO:0016021,integral component of membrane	--
gene-LOC110685015	20.59	16.44	23.97	10.75	7.76	9.99	820	641	841	391	295	378	2.686	1.426	8.57875e-07	2.76713e-05	up	NW_018743791.1	699559	702164	+	LOC110685015	--	--	uncharacterized protein LOC110685015 [Chenopodium quinoa]	--	SubName: Full=Uncharacterized protein {ECO:0000313|EMBL:KNA18253.1};	--	--	Protein of unknown function (DUF1005)
gene-LOC110685025	2.56	2.29	1.17	1.1	0.15	0.08	104	91	42	41	6	3	5.669	2.503	0.00354832	0.0268602	up	NW_018743791.1	755218	758088	-	LOC110685025	--	K23810 (E)-8-carboxylinalool synthase [EC:1.14.14.-] | (RefSeq) geraniol 8-hydroxylase (A)	cytochrome P450 76AD1-like [Chenopodium quinoa]	RecName: Full=Cytochrome P450 76AD1 {ECO:0000303|PubMed:22660548}; EC=1.14.-.- {ECO:0000305};	SubName: Full=Cytochrome P450 CYP76AD5 {ECO:0000313|EMBL:AJD87473.1};	Cytochrome P450 CYP2 subfamily	GO:0016021,integral component of membrane; GO:0020037,heme binding; GO:0005506,iron ion binding; GO:0004497,monooxygenase activity; GO:0016705,oxidoreductase activity, acting on paired donors, with incorporation or reduction of molecular oxygen	Cytochrome P450
gene-LOC110685047	2.02	2.85	1.86	6.29	6.42	6.16	132	182	107	375	400	382	0.445	-1.167	2.23622e-07	8.37906e-06	down	NW_018742287.1	1132190	1152778	-	LOC110685047	--	K15718 linoleate 9S-lipoxygenase [EC:1.13.11.58] | (RefSeq) probable linoleate 9S-lipoxygenase 5 (A)	probable linoleate 9S-lipoxygenase 5 [Chenopodium quinoa]	RecName: Full=Probable linoleate 9S-lipoxygenase 5; EC=1.13.11.58; AltName: Full=Leaf lipoxygenase;	RecName: Full=Lipoxygenase {ECO:0000256|RuleBase:RU003975}; EC=1.13.11.- {ECO:0000256|RuleBase:RU003975};	--	GO:0005737,cytoplasm; GO:0046872,metal ion binding; GO:0016702,oxidoreductase activity, acting on single donors with incorporation of molecular oxygen, incorporation of two atoms of oxygen; GO:0031408,oxylipin biosynthetic process	Lipoxygenase
gene-LOC110685063	2.35	4.18	4.07	10.46	13.98	8.41	157	273	239	637	890	533	0.404	-1.308	2.04171e-07	7.75161e-06	down	NW_018743791.1	1112021	1116883	+	LOC110685063	--	K04728 ataxia telangiectasia mutated family protein [EC:2.7.11.1] | (RefSeq) serine/threonine-protein kinase ATM (A)	uncharacterized protein LOC110685063 [Chenopodium quinoa]	RecName: Full=Serine/threonine-protein kinase ATM; EC=2.7.11.1; AltName: Full=Ataxia telangiectasia mutated homolog; Short=AtATM;	SubName: Full=Uncharacterized protein {ECO:0000313|EMBL:KNA23453.1};	Protein kinase ATM/Tel1, involved in telomere length regulation and DNA repair	GO:0005634,nucleus; GO:0005524,ATP binding; GO:0003677,DNA binding; GO:0004674,protein serine/threonine kinase activity; GO:0006974,cellular response to DNA damage stimulus; GO:0051321,meiotic cell cycle	--
gene-LOC110685113	0	0	0	2.05	2.42	1.67	0	0	0	26	32	22	0.009	-6.858	3.59428e-07	1.28968e-05	down	NW_018743792.1	4899266	4900076	-	LOC110685113	--	K02218 casein kinase 1 [EC:2.7.11.1] | (RefSeq) uncharacterized protein LOC8069780 (A)	protein ALP1-like [Chenopodium quinoa]	RecName: Full=Protein ALP1-like {ECO:0000305}; EC=3.1.-.-;	SubName: Full=Uncharacterized protein {ECO:0000313|EMBL:KNA24023.1};	Predicted transposase	GO:0005634,nucleus; GO:0046872,metal ion binding; GO:0004518,nuclease activity	DDE superfamily endonuclease
gene-LOC110685186	0.07	0.05	0.1	0.53	0.7	0.22	3	2	4	21	29	9	0.195	-2.357	0.00555767	0.0376835	down	NW_018743792.1	1580022	1582866	-	LOC110685186	--	--	--	--	--	--	--	--
gene-LOC110685213	0.83	0.78	1.13	2.82	4.36	3.13	25	23	30	78	126	90	0.335	-1.579	9.51913e-06	0.000223684	down	NW_018743792.1	4268318	4273121	+	LOC110685213	--	K15201 general transcription factor 3C polypeptide 3 (transcription factor C subunit 4) | (RefSeq) general transcription factor 3C polypeptide 3-like (A)	general transcription factor 3C polypeptide 3-like isoform X1 [Chenopodium quinoa]	--	SubName: Full=Uncharacterized protein {ECO:0000313|EMBL:KNA25827.1};	RNA polymerase III transcription factor TFIIIC	--	--
gene-LOC110685218	0	0	0	7.71	8.76	8.03	0	0	0	386	458	418	0.001	-10.846	1.6775e-19	4.00502e-17	down	NW_018743792.1	4897415	4903241	-	LOC110685218	--	K07517 Delta3-Delta2-enoyl-CoA isomerase [EC:5.3.3.8] | (RefSeq) uncharacterized protein LOC18427060 (A)	uncharacterized protein LOC110685218 [Chenopodium quinoa]	RecName: Full=L10-interacting MYB domain-containing protein {ECO:0000303|PubMed:25707794};	SubName: Full=Uncharacterized protein {ECO:0000313|EMBL:KNA24023.1};	--	GO:0005634,nucleus; GO:0006355,regulation of transcription, DNA-templated; GO:0006351,transcription, DNA-templated	Myb/SANT-like DNA-binding domain
gene-LOC110685233	0.05	0	0.17	1.21	1.72	1.42	4	0	11	82	122	100	0.064	-3.97	3.12022e-08	1.41723e-06	down	NW_018743792.1	6743899	6748152	-	LOC110685233	--	--	--	--	--	--	--	--
gene-LOC110685275	2.13	0.03	1.6	0.14	0.34	0.12	133	2	88	8	20	7	8.707	3.122	0.00267423	0.0217328	up	NW_018743796.1	7120	14207	-	LOC110685275	--	--	--	--	--	--	--	--
gene-LOC110685321	0.5	0.75	0.3	2.96	6.2	3.75	30	44	16	163	357	215	0.152	-2.714	2.01019e-11	1.73712e-09	down	NW_018743812.1	144140	148161	+	LOC110685321	--	--	--	--	--	--	--	--
gene-LOC110685330	0.15	1.32	0.25	3.27	2.67	4.2	4	35	6	81	69	108	0.199	-2.327	0.00101038	0.0102594	down	NW_018743812.1	218234	220138	+	LOC110685330	--	--	--	--	--	--	--	--
gene-LOC110685332	0.92	8.86	0.09	0.06	0.07	0.06	81	767	7	5	6	5	59.962	5.906	5.48217e-05	0.000978358	up	NW_018743812.1	232011	245638	-	LOC110685332	--	--	K(+) efflux antiporter 2, chloroplastic-like [Chenopodium quinoa]	RecName: Full=K(+) efflux antiporter 1, chloroplastic {ECO:0000303|PubMed:11500563}; Short=AtKEA1 {ECO:0000303|PubMed:11500563}; Flags: Precursor;	SubName: Full=Uncharacterized protein {ECO:0000313|EMBL:KNA15026.1};	Predicted K+/H+-antiporter	GO:0009507,chloroplast; GO:0009941,chloroplast envelope; GO:0031969,chloroplast membrane; GO:0016021,integral component of membrane; GO:0016020,membrane; GO:0015386,potassium:proton antiporter activity; GO:0009658,chloroplast organization; GO:0010109,regulation of photosynthesis	Sodium/hydrogen exchanger family
gene-LOC110685338	1.32	6.58	0.78	0.06	0.98	0.15	73	357	38	3	52	8	9.229	3.206	0.000624134	0.00702505	up	NW_018743812.1	312108	319895	+	LOC110685338	--	K12614 ATP-dependent RNA helicase DDX6/DHH1 [EC:3.6.4.13] | (RefSeq) DEAD-box ATP-dependent RNA helicase 8-like isoform X1 (A)	DEAD-box ATP-dependent RNA helicase 8-like isoform X1 [Chenopodium quinoa]	RecName: Full=DEAD-box ATP-dependent RNA helicase 8; EC=3.6.4.13;	SubName: Full=DEAD-box ATP-dependent RNA helicase 8-like {ECO:0000313|RefSeq:XP_018845393.1};	ATP-dependent RNA helicase	GO:0010494,cytoplasmic stress granule; GO:0005730,nucleolus; GO:0000932,P-body; GO:0005524,ATP binding; GO:0004004,ATP-dependent RNA helicase activity; GO:0003729,mRNA binding; GO:0033962,cytoplasmic mRNA processing body assembly; GO:0006397,mRNA processing; GO:0051028,mRNA transport; GO:0006417,regulation of translation; GO:0010501,RNA secondary structure unwinding; GO:0016032,viral process	DEAD/DEAH box helicase
gene-LOC110685413	18.22	10.5	18.93	0.08	0.77	0.31	248	140	227	1	10	4	53.328	5.737	1.8379e-22	6.98497e-20	up	NW_018743813.1	2403309	2404459	+	LOC110685413	--	--	--	--	--	--	--	--
gene-LOC110685422	84.47	66.37	63.78	24.55	19.99	14.26	2837	2183	1887	753	641	455	4.669	2.223	1.63559e-14	2.21519e-12	up	NW_018743813.1	736246	741924	+	LOC110685422	--	K09060 plant G-box-binding factor | (RefSeq) bZIP transcription factor 16-like (A)	UV-B-induced protein At3g17800, chloroplastic-like [Chenopodium quinoa]	RecName: Full=UV-B-induced protein At3g17800, chloroplastic {ECO:0000305}; Flags: Precursor;	SubName: Full=Uncharacterized protein {ECO:0000313|EMBL:KNA17639.1};	--	GO:0009507,chloroplast; GO:0010193,response to ozone; GO:0010224,response to UV-B; GO:0009611,response to wounding	Protein of unknown function (DUF760)
gene-LOC110685432	0.61	1.67	1.25	0.02	0.02	0	31	83	56	1	1	0	103.482	6.693	4.99459e-09	2.64614e-07	up	NW_018743813.1	2886328	2890796	+	LOC110685432	--	--	--	--	--	--	--	--
gene-LOC110685471	0.55	0.56	0.58	1.71	1.95	1.96	13	13	12	37	44	44	0.377	-1.407	0.00186121	0.0164618	down	NW_018743814.1	238663	245714	+	LOC110685471	--	--	--	--	--	--	--	--
gene-LOC110685473	1.17	1.53	3.12	5.46	7.36	4.96	46	59	108	196	276	185	0.41	-1.285	0.000844023	0.00889269	down	NW_018742287.1	2910379	2913939	-	LOC110685473	--	--	--	--	--	--	--	--
gene-LOC110685494	0	0	0	6.07	6.35	3.73	0	0	0	86	94	55	0.003	-8.412	2.45563e-11	2.06456e-09	down	NW_018743828.1	399052	400089	-	LOC110685494	--	--	--	--	--	--	--	--
gene-LOC110685509	0.15	0.5	0.46	1.21	2.54	1.1	14	47	39	107	234	101	0.283	-1.821	0.000170748	0.00246081	down	NW_018743828.1	375499	397356	-	LOC110685509	--	K15362 fanconi anemia group J protein [EC:3.6.4.12] | (RefSeq) Fanconi anemia group J protein homolog (A)	Fanconi anemia group J protein homolog [Chenopodium quinoa]	RecName: Full=Regulator of telomere elongation helicase 1 homolog {ECO:0000303|PubMed:21081662, ECO:0000303|PubMed:25516598}; EC=3.6.4.12 {ECO:0000305};	SubName: Full=Uncharacterized protein {ECO:0000313|EMBL:KNA12972.1};	Helicase of the DEAD superfamily	GO:0005739,mitochondrion; GO:0005634,nucleus; GO:0051539,4 iron, 4 sulfur cluster binding; GO:0005524,ATP binding; GO:0004003,ATP-dependent DNA helicase activity; GO:0003677,DNA binding; GO:0046872,metal ion binding; GO:0006310,DNA recombination; GO:0006281,DNA repair; GO:0006260,DNA replication; GO:0036297,interstrand cross-link repair; GO:0043007,maintenance of rDNA; GO:0070716,mismatch repair …	Helicase C-terminal domain
gene-LOC110685524	1634.39	1035.28	1350.55	927.09	630.01	917.72	56758	35207	41318	29406	20886	30280	2.055	1.039	0.0014457	0.0135972	up	NW_018743828.1	741766	744801	-	LOC110685524	--	K05298 glyceraldehyde-3-phosphate dehydrogenase (NADP+) (phosphorylating) [EC:1.2.1.13] | (RefSeq) glyceraldehyde-3-phosphate dehydrogenase B, chloroplastic (A)	glyceraldehyde-3-phosphate dehydrogenase B, chloroplastic [Chenopodium quinoa]	RecName: Full=Glyceraldehyde-3-phosphate dehydrogenase B, chloroplastic; EC=1.2.1.13; AltName: Full=NADP-dependent glyceraldehydephosphate dehydrogenase subunit B; Flags: Precursor;	RecName: Full=Glyceraldehyde-3-phosphate dehydrogenase {ECO:0000256|RuleBase:RU361160}; EC=1.2.1.- {ECO:0000256|RuleBase:RU361160};	Glyceraldehyde 3-phosphate dehydrogenase	GO:0009507,chloroplast; GO:0047100,glyceraldehyde-3-phosphate dehydrogenase (NADP+) (phosphorylating) activity; GO:0051287,NAD binding; GO:0050661,NADP binding; GO:0006006,glucose metabolic process; GO:0019253,reductive pentose-phosphate cycle	Glyceraldehyde 3-phosphate dehydrogenase, C-terminal domain
gene-LOC110685528	0.35	0.82	1.17	1.72	4.32	1.62	20	46	59	90	236	88	0.386	-1.373	0.00744646	0.0466594	down	NW_018743828.1	789365	797186	+	LOC110685528	--	K20027 palmitoyltransferase ZDHHC1/11 [EC:2.3.1.225] | (RefSeq) protein S-acyltransferase 21-like (A)	protein S-acyltransferase 21-like [Chenopodium quinoa]	RecName: Full=Probable protein S-acyltransferase 19; EC=2.3.1.225; AltName: Full=Probable palmitoyltransferase At4g15080; AltName: Full=Zinc finger DHHC domain-containing protein At4g15080;	RecName: Full=S-acyltransferase {ECO:0000256|RuleBase:RU079119}; EC=2.3.1.225 {ECO:0000256|RuleBase:RU079119}; AltName: Full=Palmitoyltransferase {ECO:0000256|RuleBase:RU079119};	DHHC-type Zn-finger proteins	GO:0016021,integral component of membrane; GO:0005886,plasma membrane; GO:0019706,protein-cysteine S-palmitoyltransferase activity	DHHC palmitoyltransferase
gene-LOC110685547	130.76	91.06	122.28	77.27	49.62	85.64	3150	2148	2595	1700	1141	1960	2.031	1.022	0.00246473	0.020341	up	NW_018743828.1	1035533	1037624	+	LOC110685547	--	K09264 MADS-box transcription factor, plant | (RefSeq) uncharacterized LOC100784410 (A)	psbP domain-containing protein 3, chloroplastic-like [Chenopodium quinoa]	RecName: Full=PsbP domain-containing protein 3, chloroplastic; AltName: Full=OEC23-like protein 2; Flags: Precursor;	SubName: Full=Uncharacterized protein {ECO:0000313|EMBL:KNA16164.1};	--	GO:0009507,chloroplast; GO:0009543,chloroplast thylakoid lumen; GO:0009535,chloroplast thylakoid membrane; GO:0019898,extrinsic component of membrane; GO:0009654,photosystem II oxygen evolving complex; GO:0009579,thylakoid; GO:0031977,thylakoid lumen; GO:0005509,calcium ion binding; GO:0015979,photosynthesis	PsbP
gene-LOC110685553	1.94	3.78	4.97	11.52	27.62	6.35	54	103	122	293	734	168	0.301	-1.73	0.000608981	0.00689896	down	NW_018743828.1	1160276	1162708	-	LOC110685553	--	K07760 cyclin-dependent kinase [EC:2.7.11.22] | (RefSeq) cell division control protein 2 homolog D-like (A)	cell division control protein 2 homolog D-like [Chenopodium quinoa]	RecName: Full=Cell division control protein 2 homolog D; EC=2.7.11.22; EC=2.7.11.23;	SubName: Full=Uncharacterized protein {ECO:0000313|EMBL:KNA04559.1};	Protein kinase PCTAIRE and related kinases	GO:0005524,ATP binding; GO:0004693,cyclin-dependent protein serine/threonine kinase activity; GO:0008353,RNA polymerase II CTD heptapeptide repeat kinase activity; GO:0007049,cell cycle; GO:0051301,cell division	Protein kinase domain
gene-LOC110685558	1.31	1.78	1.3	5.63	13.31	3.67	46	61	40	180	445	122	0.252	-1.989	1.10002e-05	0.000251531	down	NW_018743828.1	1275821	1279802	+	LOC110685558	--	K02178 checkpoint serine/threonine-protein kinase [EC:2.7.11.1] | (RefSeq) mitotic spindle checkpoint protein BUBR1 (A)	mitotic spindle checkpoint protein BUBR1 [Chenopodium quinoa]	RecName: Full=Mitotic spindle checkpoint protein BUBR1; AltName: Full=BUB1-related protein 1;	SubName: Full=Uncharacterized protein {ECO:0000313|EMBL:KNA03673.1}; Flags: Fragment;	Mitotic checkpoint serine/threonine protein kinase	GO:0010369,chromocenter; GO:0000778,condensed nuclear chromosome kinetochore; GO:0005737,cytoplasm; GO:0000776,kinetochore; GO:0005828,kinetochore microtubule; GO:0005815,microtubule organizing center; GO:0005876,spindle microtubule; GO:0004672,protein kinase activity; GO:0051754,meiotic sister chromatid cohesion, centromeric; GO:0007094,mitotic spindle assembly checkpoint	Mad3/BUB1 homology region 1
gene-LOC110685572	1.65	3.63	2.9	12.2	38.89	6.57	64	138	99	432	1440	242	0.183	-2.447	7.70436e-06	0.000185607	down	NW_018743828.1	1638774	1643135	+	LOC110685572	--	K06627 cyclin-A | (RefSeq) cyclin-A1-4 (A)	cyclin-A1-4 [Chenopodium quinoa]	RecName: Full=Cyclin-A1-1; AltName: Full=G2/mitotic-specific cyclin-A1-1; Short=CycA1;1;	SubName: Full=Uncharacterized protein {ECO:0000313|EMBL:KNA05147.1};	G2/Mitotic-specific cyclin A	GO:0005634,nucleus; GO:0007049,cell cycle; GO:0051301,cell division	Cyclin, N-terminal domain
gene-LOC110685573	2.01	2.47	2.25	12.21	13.97	11.43	83	100	82	461	551	449	0.225	-2.153	1.18912e-29	8.20159e-27	down	NW_018743828.1	1714976	1718833	+	LOC110685573	--	K15015 solute carrier family 32 (vesicular inhibitory amino acid transporter) | (RefSeq) amino acid transporter AVT1E isoform X1 (A)	amino acid permease 3-like [Chenopodium quinoa]	RecName: Full=Amino acid permease 3; AltName: Full=Amino acid transporter AAP3;	SubName: Full=Uncharacterized protein {ECO:0000313|EMBL:KNA08084.1};	Amino acid transporters	GO:0016021,integral component of membrane; GO:0031965,nuclear membrane; GO:0005886,plasma membrane; GO:0015171,amino acid transmembrane transporter activity; GO:0015293,symporter activity; GO:0003333,amino acid transmembrane transport; GO:0015802,basic amino acid transport	Transmembrane amino acid transporter protein
gene-LOC110685589	0	0	0	0.24	0.12	0.29	0	0	0	15	8	19	0.016	-5.976	0.000106428	0.00168965	down	NW_018743828.1	1208639	1212723	+	LOC110685589	--	K17604 zinc finger SWIM domain-containing protein 3 | (RefSeq) uncharacterized LOC104456899 (A)	uncharacterized protein LOC110685589 [Chenopodium quinoa]	RecName: Full=Protein FAR1-RELATED SEQUENCE 5;	SubName: Full=Uncharacterized protein {ECO:0000313|EMBL:CAN80287.1};	--	GO:0005634,nucleus; GO:0008270,zinc ion binding; GO:0006355,regulation of transcription, DNA-templated	MULE transposase domain
gene-LOC110685599	0	0.07	0	0.31	0.37	0.17	0	4	0	18	22	10	0.095	-3.395	0.00475695	0.0335364	down	NW_018743835.1	15647	21167	+	LOC110685599	--	K23877 xyloglucan O-acetyltransferase | (RefSeq) protein ALTERED XYLOGLUCAN 4 (A)	protein trichome berefringence-like 7 isoform X1 [Chenopodium quinoa]	RecName: Full=Protein trichome berefringence-like 7;	SubName: Full=Uncharacterized protein {ECO:0000313|EMBL:KNA08088.1};	--	GO:0005794,Golgi apparatus; GO:0016021,integral component of membrane; GO:0016413,O-acetyltransferase activity; GO:0071554,cell wall organization or biogenesis	GDSL/SGNH-like Acyl-Esterase family found in Pmr5 and Cas1p
gene-LOC110685634	64.01	59.79	39.49	16.87	13.12	20.77	2335	2136	1269	562	457	720	4.026	2.009	8.97067e-10	5.52252e-08	up	NW_018743850.1	4428047	4429836	-	LOC110685634	--	--	--	--	--	--	--	--
gene-LOC110685726	0	0.1	0.21	6.14	7.93	5.02	0	1	2	60	81	51	0.02	-5.679	1.57856e-09	9.33227e-08	down	NW_018743850.1	6701955	6702479	-	LOC110685726	--	--	nodulin-related protein 1-like [Chenopodium quinoa]	RecName: Full=Nodulin-related protein 1 {ECO:0000303|PubMed:20016941}; Short=AtNRP1 {ECO:0000303|PubMed:20016941}; AltName: Full=RPS2-interacting protein 11 {ECO:0000303|Ref.5};	SubName: Full=Uncharacterized protein {ECO:0000313|EMBL:KNA07987.1};	--	GO:0009738,abscisic acid-activated signaling pathway; GO:0006952,defense response; GO:1900426,positive regulation of defense response to bacterium; GO:0009617,response to bacterium; GO:0009409,response to cold; GO:0009408,response to heat; GO:0009651,response to salt stress	--
gene-LOC110685742	1.14	2.05	2.18	0.64	0.94	0.33	37	65	62	19	29	10	3.545	1.826	0.000131127	0.00200377	up	NW_018743850.1	13124	14926	+	LOC110685742	--	K17710 pentatricopeptide repeat domain-containing protein 1 | (RefSeq) pentatricopeptide repeat-containing protein At2g18940, chloroplastic (A)	pentatricopeptide repeat-containing protein At5g67570, chloroplastic-like [Chenopodium quinoa]	RecName: Full=Pentatricopeptide repeat-containing protein At5g67570, chloroplastic; AltName: Full=Protein DELAYED GREENING 1; AltName: Full=Protein EMBRYO DEFECTIVE 1408; Flags: Precursor;	SubName: Full=Uncharacterized protein {ECO:0000313|EMBL:KNA08688.1};	FOG: PPR repeat	GO:0009507,chloroplast; GO:0004519,endonuclease activity; GO:0003723,RNA binding; GO:0009658,chloroplast organization; GO:0009451,RNA modification; GO:0042793,plastid transcription	PPR repeat family
gene-LOC110685748	0.2	0.21	0.1	0.49	1.29	0.59	9	9	4	20	55	25	0.28	-1.839	0.00482275	0.0339232	down	NW_018743850.1	94874	98663	-	LOC110685748	--	K05349 beta-glucosidase [EC:3.2.1.21] | (RefSeq) uncharacterized protein LOC110685748 (A)	uncharacterized protein LOC110685748 [Chenopodium quinoa]	RecName: Full=Beta-D-xylosidase 4; Short=AtBXL4; EC=3.2.1.37; Flags: Precursor;	SubName: Full=Uncharacterized protein {ECO:0000313|EMBL:KNA08684.1};	--	GO:0048046,apoplast; GO:0005618,cell wall; GO:0009044,xylan 1,4-beta-xylosidase activity; GO:0009627,systemic acquired resistance; GO:0045493,xylan catabolic process	Glycosyl hydrolase family 3 N terminal domain
gene-LOC110685763	15.56	5.96	9.83	5.66	6.36	5.11	397	149	221	132	155	124	2.396	1.26	0.00297479	0.0236016	up	NW_018743850.1	237943	241575	+	LOC110685763	--	K10878 meiotic recombination protein SPO11 | (RefSeq) DNA topoisomerase 6 subunit A-like (A)	thioredoxin-like protein AAED1, chloroplastic [Chenopodium quinoa]	RecName: Full=Thioredoxin-like protein AAED1, chloroplastic; AltName: Full=AhpC/TSA antioxidant enzyme domain-containing protein 1; Flags: Precursor;	SubName: Full=Uncharacterized protein {ECO:0000313|EMBL:KDO78865.1};	Uncharacterized conserved protein	GO:0009507,chloroplast; GO:0016209,antioxidant activity; GO:0055114,oxidation-reduction process	AhpC/TSA antioxidant enzyme
gene-LOC110685765	0.2	0.63	0.24	0.7	3.57	0.79	12	38	13	39	209	46	0.271	-1.883	0.00743488	0.0466047	down	NW_018743850.1	260084	264529	+	LOC110685765	--	K09285 AP2-like factor, ANT lineage | (RefSeq) AP2-like ethylene-responsive transcription factor ANT (A)	AP2-like ethylene-responsive transcription factor ANT [Chenopodium quinoa]	RecName: Full=AP2-like ethylene-responsive transcription factor ANT; AltName: Full=Complementing a protein kinase C mutant protein 1; AltName: Full=Protein AINTEGUMENTA; AltName: Full=Protein DRAGON; AltName: Full=Protein OVULE MUTANT;	SubName: Full=Uncharacterized protein {ECO:0000313|EMBL:KNA08140.1};	--	GO:0005634,nucleus; GO:0003677,DNA binding; GO:0003700,DNA-binding transcription factor activity; GO:0043565,sequence-specific DNA binding; GO:0030154,cell differentiation; GO:0009908,flower development; GO:0019760,glucosinolate metabolic process; GO:0010492,maintenance of shoot apical meristem identity; GO:0042127,regulation of cell proliferation; GO:0006351,transcription, DNA-templated	AP2 domain
gene-LOC110685769	0	0.05	0.05	0.15	0.63	0.33	0	3	3	9	38	20	0.113	-3.147	0.00193641	0.0169698	down	NW_018743850.1	332347	335560	-	LOC110685769	--	K22262 WD repeat and FYVE domain-containing protein 3 | (RefSeq) protein SPIRRIG (A)	pentatricopeptide repeat-containing protein At3g49740-like [Chenopodium quinoa]	RecName: Full=Pentatricopeptide repeat-containing protein At3g49740;	SubName: Full=Uncharacterized protein {ECO:0000313|EMBL:KNA25245.1};	FOG: PPR repeat	GO:0043231,intracellular membrane-bounded organelle; GO:0004519,endonuclease activity; GO:0003723,RNA binding; GO:0009451,RNA modification	PPR repeat family
gene-LOC110685801	1.48	3.75	3.1	11.95	10.9	5.99	44	109	81	324	309	169	0.357	-1.487	8.93402e-05	0.00146134	down	NW_018743850.1	581846	586445	+	LOC110685801	--	K14759 isochorismate synthase / 2-succinyl-5-enolpyruvyl-6-hydroxy-3-cyclohexene-1-carboxylate synthase / 2-succinyl-6-hydroxy-2,4-cyclohexadiene-1-carboxylate synthase / O-succinylbenzoate synthase [EC:5.4.4.2 2.2.1.9 4.2.99.20 4.2.1.113] | (RefSeq) protein PHYLLO, chloroplastic isoform X1 (A)	epoxide hydrolase 4-like [Chenopodium quinoa]	RecName: Full=Protein PHYLLO, chloroplastic; Includes: RecName: Full=Inactive isochorismate synthase; AltName: Full=MENF; Includes: RecName: Full=2-succinyl-5-enolpyruvyl-6-hydroxy-3-cyclohexene-1-carboxylate synthase; EC=2.2.1.9; AltName: Full=MEND; Includes: RecName: Full=o-succinylbenzoate synthase; EC=4.2.1.113; AltName: Full=MENC; Includes: RecName: Full=2-succinyl-6-hydroxy-2,4-cyclohexadie…	SubName: Full=Uncharacterized protein {ECO:0000313|EMBL:KNA13734.1};	Predicted hydrolase/acyltransferase (alpha/beta hydrolase superfamily)	GO:0031969,chloroplast membrane; GO:0016021,integral component of membrane; GO:0070204,2-succinyl-5-enolpyruvyl-6-hydroxy-3-cyclohexene-1-carboxylic-acid synthase activity; GO:0070205,2-succinyl-6-hydroxy-2,4-cyclohexadiene-1-carboxylate synthase activity; GO:0046872,metal ion binding; GO:0030976,thiamine pyrophosphate binding; GO:0009063,cellular amino acid catabolic process; GO:0009234,menaquin…	alpha/beta hydrolase fold
gene-LOC110685804	1.7	0.04	0.32	0	0	0	42	1	7	0	0	0	119.822	6.905	0.000234446	0.00320086	up	NW_018743850.1	650502	656017	-	LOC110685804	--	K15397 3-ketoacyl-CoA synthase [EC:2.3.1.199] | (RefSeq) 3-ketoacyl-CoA synthase 17-like (A)	protein RADIALIS-like 3 [Chenopodium quinoa]	RecName: Full=Transcription factor RADIALIS;	SubName: Full=Uncharacterized protein {ECO:0000313|EMBL:KNA12251.1};	Zuotin and related molecular chaperones (DnaJ superfamily), contains DNA-binding domains	GO:0005634,nucleus; GO:0003677,DNA binding; GO:0048262,determination of dorsal/ventral asymmetry; GO:0009908,flower development; GO:0006355,regulation of transcription, DNA-templated; GO:0006351,transcription, DNA-templated	Myb-like DNA-binding domain
gene-LOC110685814	49.32	29.1	32.56	28.23	20.41	18.8	1544	892	898	807	610	559	2.114	1.08	0.00157647	0.0145372	up	NW_018743850.1	719737	723026	+	LOC110685814	--	K13699 abhydrolase domain-containing protein 5 [EC:2.3.1.51] | (RefSeq) hydrolase, alpha/beta fold family protein (A)	pheophytinase, chloroplastic-like isoform X1 [Chenopodium quinoa]	RecName: Full=Pheophytinase, chloroplastic; EC=3.1.1.-; AltName: Full=Pheophytin pheophorbide hydrolase; AltName: Full=Protein CO-REGULATED WITH NYE1; Flags: Precursor;	SubName: Full=Uncharacterized protein {ECO:0000313|EMBL:KNA06238.1};	Predicted hydrolase/acyltransferase (alpha/beta hydrolase superfamily)	GO:0009507,chloroplast; GO:0009570,chloroplast stroma; GO:0009535,chloroplast thylakoid membrane; GO:0080124,pheophytinase activity; GO:0015996,chlorophyll catabolic process	Alpha/beta hydrolase family
gene-LOC110685846	0.23	2.07	0.3	3.95	12.71	5.97	6	54	7	96	323	151	0.14	-2.837	0.000132921	0.00202729	down	NW_018743850.1	1029624	1031622	+	LOC110685846	--	K00430 peroxidase [EC:1.11.1.7] | (RefSeq) peroxidase 72-like (A)	peroxidase 72-like [Chenopodium quinoa]	RecName: Full=Peroxidase 72; Short=Atperox P72; EC=1.11.1.7; AltName: Full=ATP6a; AltName: Full=PRXR8; Flags: Precursor;	RecName: Full=Peroxidase {ECO:0000256|RuleBase:RU362060, ECO:0000256|SAAS:SAAS00709852}; EC=1.11.1.7 {ECO:0000256|RuleBase:RU362060, ECO:0000256|SAAS:SAAS00709852};	--	GO:0005576,extracellular region; GO:0020037,heme binding; GO:0046872,metal ion binding; GO:0004601,peroxidase activity; GO:0042744,hydrogen peroxide catabolic process; GO:0009809,lignin biosynthetic process; GO:0006979,response to oxidative stress	Peroxidase
gene-LOC110685855	2.42	3.11	4.2	1.62	2.1	1.56	152	191	232	93	126	93	2.308	1.207	9.62397e-06	0.000225787	up	NW_018743850.1	1085305	1089521	+	LOC110685855	--	K18171 COX assembly mitochondrial protein 1 | (RefSeq) protein GAMETE EXPRESSED 1 (A)	protein GAMETE EXPRESSED 1-like [Chenopodium quinoa]	RecName: Full=Protein GAMETE EXPRESSED 1; Flags: Precursor;	SubName: Full=Uncharacterized protein {ECO:0000313|EMBL:KNA13763.1};	--	GO:0005887,integral component of plasma membrane; GO:0005886,plasma membrane; GO:0042802,identical protein binding; GO:0009793,embryo development ending in seed dormancy; GO:0009553,embryo sac development; GO:0009555,pollen development	Dolichol-phosphate mannosyltransferase subunit 3 (DPM3)
gene-LOC110685867	2	3.41	2.99	10.9	18.74	5.69	127	212	167	632	1136	343	0.303	-1.722	7.15034e-06	0.000174747	down	NW_018743850.1	1172062	1185313	+	LOC110685867	--	--	protein MICRORCHIDIA 2-like [Chenopodium quinoa]	RecName: Full=Protein MICRORCHIDIA 2 {ECO:0000303|PubMed:24799676}; Short=AtMORC2 {ECO:0000303|PubMed:24799676}; EC=3.6.-.-; AltName: Full=Protein CRT1-homolog 1 {ECO:0000303|PubMed:19704828}; Short=CRT1-h1 {ECO:0000303|PubMed:19704828};	SubName: Full=Uncharacterized protein {ECO:0000313|EMBL:KNA07408.1};	MORC family ATPases	GO:0005768,endosome; GO:0005634,nucleus; GO:0005524,ATP binding; GO:0016887,ATPase activity; GO:0003677,DNA binding; GO:0004519,endonuclease activity; GO:0016301,kinase activity; GO:0003723,RNA binding; GO:0016569,covalent chromatin modification; GO:0051607,defense response to virus; GO:0006281,DNA repair; GO:0031047,gene silencing by RNA; GO:0009626,plant-type hypersensitive response; GO:1900426…	Morc6 ribosomal protein S5 domain 2-like
gene-LOC110685871	2.64	3.62	1.55	0.33	0.85	0.75	52	70	27	6	16	14	5.099	2.35	2.19198e-05	0.000453054	up	NW_018743850.1	1219711	1221592	-	LOC110685871	--	K03676 glutaredoxin 3 | (RefSeq) glutaredoxin-C3-like (A)	glutaredoxin-C3-like [Chenopodium quinoa]	RecName: Full=Glutaredoxin-C3; Short=AtGrxC3;	SubName: Full=Uncharacterized protein {ECO:0000313|EMBL:KNA13331.1};	Glutaredoxin and related proteins	GO:0005794,Golgi apparatus; GO:0009055,electron transfer activity; GO:0015035,protein disulfide oxidoreductase activity; GO:0045454,cell redox homeostasis	Glutaredoxin
gene-LOC110685875	0.12	0.02	0	0.68	1.96	0.35	5	1	0	26	78	14	0.068	-3.881	0.000270367	0.00360151	down	NW_018743850.1	1237078	1239121	+	LOC110685875	--	K20718 LRR receptor-like serine/threonine-protein kinase ERECTA [EC:2.7.11.1] | (RefSeq) LRR receptor-like serine/threonine-protein kinase ERECTA (A)	LRR receptor-like serine/threonine-protein kinase ERL1 [Chenopodium quinoa]	RecName: Full=Probable inactive leucine-rich repeat receptor kinase XIAO {ECO:0000305}; Flags: Precursor;	SubName: Full=Uncharacterized protein {ECO:0000313|EMBL:KNA22794.1};	FOG: Leucine rich repeat	GO:0016021,integral component of membrane; GO:0005886,plasma membrane; GO:0005524,ATP binding; GO:0004672,protein kinase activity; GO:0009742,brassinosteroid mediated signaling pathway; GO:0090696,post-embryonic plant organ development	Leucine rich repeat
gene-LOC110685885	0	0.03	0	0.51	0.99	0.49	0	1	0	17	34	17	0.02	-5.64	4.43506e-05	0.000818958	down	NW_018742292.1	324477	330728	-	LOC110685885	--	K23810 (E)-8-carboxylinalool synthase [EC:1.14.14.-] | (RefSeq) GFH2; ripening-related P-450 enzyme-like (A)	cytochrome P450 76AD1-like [Chenopodium quinoa]	RecName: Full=Geraniol 8-hydroxylase; EC=1.14.13.152; AltName: Full=Cytochrome P450 76B6; AltName: Full=Geraniol 10-hydroxylase; Short=CrG10H;	SubName: Full=geraniol 8-hydroxylase-like isoform X1 {ECO:0000313|RefSeq:XP_018820515.1}; SubName: Full=geraniol 8-hydroxylase-like isoform X2 {ECO:0000313|RefSeq:XP_018820516.1};	Cytochrome P450 CYP2 subfamily	GO:0005789,endoplasmic reticulum membrane; GO:0016021,integral component of membrane; GO:0102811,geraniol 10-hydroxylase activity; GO:0020037,heme binding; GO:0005506,iron ion binding; GO:0016709,oxidoreductase activity, acting on paired donors, with incorporation or reduction of molecular oxygen, NAD(P)H as one donor, and incorporation of one atom of oxygen; GO:0016099,monoterpenoid biosynthetic…	Cytochrome P450
gene-LOC110685886	1.62	17.39	3.3	25.84	39.57	24.25	60	632	108	876	1402	855	0.296	-1.755	0.00724234	0.0457421	down	NW_018743850.1	1369435	1372060	-	LOC110685886	--	K01051 pectinesterase [EC:3.1.1.11] | (RefSeq) probable pectinesterase 53 isoform X1 (A)	probable pectinesterase 53 isoform X1 [Chenopodium quinoa]	RecName: Full=Probable pectinesterase 53; Short=PE 53; EC=3.1.1.11; AltName: Full=Pectin methylesterase 53; Short=AtPME53; Flags: Precursor;	RecName: Full=Pectinesterase {ECO:0000256|RuleBase:RU000589}; EC=3.1.1.11 {ECO:0000256|RuleBase:RU000589};	--	GO:0005618,cell wall; GO:0005737,cytoplasm; GO:0005576,extracellular region; GO:0045330,aspartyl esterase activity; GO:0030599,pectinesterase activity; GO:0042545,cell wall modification; GO:0045490,pectin catabolic process	Pectinesterase
gene-LOC110685888	1.1	1.4	1.14	3.55	4.61	4.39	87	109	80	257	349	331	0.364	-1.458	1.71737e-10	1.22301e-08	down	NW_018743850.1	1388448	1396744	+	LOC110685888	--	K11498 centromeric protein E | (RefSeq) kinesin-like protein KIN-7E isoform X1 (A)	kinesin-like protein KIN-7E isoform X1 [Chenopodium quinoa]	RecName: Full=Kinesin-like protein KIN-7H {ECO:0000305};	SubName: Full=Uncharacterized protein {ECO:0000313|EMBL:KNA21547.1};	Kinesin-like protein	GO:0005871,kinesin complex; GO:0005874,microtubule; GO:0009506,plasmodesma; GO:0005524,ATP binding; GO:0016887,ATPase activity; GO:0008017,microtubule binding; GO:0003777,microtubule motor activity; GO:0007018,microtubule-based movement	Kinesin motor domain
gene-LOC110685906	27.68	16.27	12.4	5.77	4.39	6.2	945	544	373	180	143	201	4.412	2.142	1.42419e-07	5.59535e-06	up	NW_018743850.1	1917521	1920082	+	LOC110685906	--	--	uncharacterized protein LOC110685906 [Chenopodium quinoa]	--	SubName: Full=Uncharacterized protein {ECO:0000313|EMBL:KNA14229.1};	--	--	--
gene-LOC110685927	3.46	5.35	6.66	2.41	2.53	3.31	33	50	56	21	23	30	2.312	1.209	0.00496418	0.0346627	up	NW_018742292.1	1301872	1302490	+	LOC110685927	--	--	--	--	--	--	--	--
gene-LOC110685933	0.11	0.14	0.09	1.11	1.26	0.95	4	5	3	37	44	33	0.13	-2.939	1.80844e-06	5.28277e-05	down	NW_018743850.1	2515221	2519716	-	LOC110685933	--	K20098 DNA excision repair protein ERCC-6-like 2 [EC:3.6.4.-] | (RefSeq) DNA repair and recombination RAD26-like protein, putative (A)	O-acyltransferase WSD1-like [Chenopodium quinoa]	RecName: Full=O-acyltransferase WSD1; AltName: Full=Diacylglycerol O-acyltransferase; Short=DGAT; EC=2.3.1.20; AltName: Full=Long-chain-alcohol O-fatty-acyltransferase; EC=2.3.1.75; AltName: Full=Wax synthase; Short=WS;	SubName: Full=Uncharacterized protein {ECO:0000313|EMBL:KNA12680.1};	--	GO:0005783,endoplasmic reticulum; GO:0005789,endoplasmic reticulum membrane; GO:0016021,integral component of membrane; GO:0005886,plasma membrane; GO:0102966,arachidoyl-CoA:1-dodecanol O-acyltransferase activity; GO:0004144,diacylglycerol O-acyltransferase activity; GO:0047196,long-chain-alcohol O-fatty-acyltransferase activity; GO:0103095,wax ester synthase activity; GO:0019432,triglyceride bio…	Protein of unknown function (DUF1298)
gene-LOC110685942	0.14	0.27	0.26	0.86	1.63	0.69	12	22	19	66	131	55	0.265	-1.914	3.17863e-05	0.000618214	down	NW_018743850.1	2746742	2760844	+	LOC110685942	--	K10728 topoisomerase (DNA) II binding protein 1 | (RefSeq) DNA topoisomerase 2-binding protein 1-A-like (A)	DNA topoisomerase 2-binding protein 1-A-like [Chenopodium quinoa]	RecName: Full=BRCT domain-containing protein At4g02110;	SubName: Full=Uncharacterized protein {ECO:0000313|EMBL:KNA12687.1};	Nucleotide excision repair factor NEF2, RAD4/CUT5 component	--	twin BRCT domain
gene-LOC110685970	2.69	2.17	12.64	2.34	1.75	1.72	137	108	567	109	85	83	3.733	1.9	0.00225422	0.019028	up	NW_018743850.1	3255205	3258991	+	LOC110685970	--	--	--	--	--	--	--	--
gene-LOC110685998	0.38	0.81	0.4	1.31	5.47	0.96	15	31	14	47	205	36	0.268	-1.902	0.00464596	0.0329723	down	NW_018743850.1	3785934	3788551	-	LOC110685998	--	--	F-box protein At1g10780-like [Chenopodium quinoa]	RecName: Full=F-box protein At1g10780;	SubName: Full=Uncharacterized protein {ECO:0000313|EMBL:KNA05810.1};	--	GO:0009506,plasmodesma	F-box-like
gene-LOC110686001	3.04	3.78	3.76	2.17	2.14	1.3	101	123	110	66	68	41	2.373	1.247	2.59206e-05	0.000521	up	NW_018743850.1	3791054	3793539	-	LOC110686001	--	--	--	--	--	--	--	--
gene-LOC110686021	35.87	20.69	21.11	1.96	1.26	1.38	2624	1482	1360	131	88	96	21.659	4.437	8.84406e-33	7.31993e-30	up	NW_018743850.1	4450505	4454093	-	LOC110686021	--	K23260 scopoletin glucosyltransferase [EC:2.4.1.128] | (RefSeq) scopoletin glucosyltransferase-like (A)	scopoletin glucosyltransferase-like [Chenopodium quinoa]	RecName: Full=Scopoletin glucosyltransferase; EC=2.4.1.128; AltName: Full=Phenylpropanoid:glucosyltransferase 1;	SubName: Full=Uncharacterized protein {ECO:0000313|EMBL:KNA05928.1};	UDP-glucuronosyl and UDP-glucosyl transferase	GO:0042802,identical protein binding; GO:0050275,scopoletin glucosyltransferase activity; GO:0008152,metabolic process	UDP-glucoronosyl and UDP-glucosyl transferase
gene-LOC110686024	12.33	10.33	3.58	3.26	2.36	4.57	645	529	165	156	118	227	3.238	1.695	0.000807589	0.00861317	up	NW_018743850.1	4495150	4497716	-	LOC110686024	--	--	--	--	--	--	--	--
gene-LOC110686054	0.03	0	0	0.15	0.56	0.31	2	0	0	10	39	22	0.037	-4.77	0.000300603	0.0039077	down	NW_018743850.1	5209785	5214354	+	LOC110686054	--	K11843 ubiquitin carboxyl-terminal hydrolase 14 [EC:3.4.19.12] | (RefSeq) ubiquitin carboxyl-terminal hydrolase 6 (A)	ubiquitin carboxyl-terminal hydrolase 6-like [Chenopodium quinoa]	RecName: Full=Ubiquitin carboxyl-terminal hydrolase 6; EC=3.4.19.12; AltName: Full=Deubiquitinating enzyme 6; Short=AtUBP6; AltName: Full=Ubiquitin thioesterase 6; AltName: Full=Ubiquitin-specific-processing protease 6;	SubName: Full=Uncharacterized protein {ECO:0000313|EMBL:KMS99288.1};	Ubiquitin-specific protease	GO:0005634,nucleus; GO:0009506,plasmodesma; GO:0005516,calmodulin binding; GO:0036459,thiol-dependent ubiquitinyl hydrolase activity; GO:0016579,protein deubiquitination; GO:0006511,ubiquitin-dependent protein catabolic process	Ubiquitin carboxyl-terminal hydrolase
gene-LOC110686057	0.18	0.19	0.39	2.42	2.7	4.37	9	9	17	108	126	203	0.099	-3.336	1.18652e-11	1.05722e-09	down	NW_018743850.1	5224582	5237689	+	LOC110686057	--	--	uncharacterized protein LOC110686057 [Chenopodium quinoa]	--	--	--	--	--
gene-LOC110686069	1.46	3.21	2.92	5.46	10.3	4.71	99	213	174	338	666	303	0.466	-1.102	0.00171022	0.0154305	down	NW_018743850.1	5413077	5425858	-	LOC110686069	--	K10754 replication factor C subunit 1 | (RefSeq) LOW QUALITY PROTEIN: replication factor C subunit 1-like (A)	LOW QUALITY PROTEIN: replication factor C subunit 1-like [Chenopodium quinoa]	RecName: Full=Replication factor C subunit 1; Short=AtRFC1; AltName: Full=Activator 1 large subunit; AltName: Full=Activator 1 subunit 1;	RecName: Full=Replication factor C subunit 1 {ECO:0000256|PIRNR:PIRNR036578};	Replication factor C, subunit RFC1 (large subunit)	GO:0005663,DNA replication factor C complex; GO:0005634,nucleus; GO:0005524,ATP binding; GO:0003689,DNA clamp loader activity; GO:0006974,cellular response to DNA damage stimulus; GO:0006281,DNA repair; GO:0006260,DNA replication; GO:0051321,meiotic cell cycle; GO:0031935,regulation of chromatin silencing; GO:0051570,regulation of histone H3-K9 methylation; GO:0000003,reproduction; GO:0000712,res…	Replication factor RFC1 C terminal domain
gene-LOC110686070	3.83	0.02	12.56	0	0	0	230	1	664	0	0	0	2131.14	11.057	0.00020489	0.00286454	up	NW_018743850.1	5426605	5430668	+	LOC110686070	--	--	--	--	--	--	--	--
gene-LOC110686077	1.3	1.73	1.88	0.63	0.87	1.02	36	47	46	16	23	27	2.417	1.273	0.00240628	0.0199736	up	NW_018743850.1	5554729	5556092	+	LOC110686077	--	K22312 hydroxyjasmonate sulfotransferase [EC:2.8.2.39] | (RefSeq) cytosolic sulfotransferase 15-like (A)	cytosolic sulfotransferase 12-like [Chenopodium quinoa]	RecName: Full=Cytosolic sulfotransferase 5; Short=AtSOT5; EC=2.8.2.-; AltName: Full=Flavonoid 7-sulfotransferase 3a; Short=AtST3a;	RecName: Full=Sulfotransferase {ECO:0000256|RuleBase:RU361155}; EC=2.8.2.- {ECO:0000256|RuleBase:RU361155};	Sulfotransferase	GO:0005737,cytoplasm; GO:1990135,flavonoid sulfotransferase activity; GO:0008146,sulfotransferase activity; GO:0009812,flavonoid metabolic process	Sulfotransferase domain
gene-LOC110686079	0.8	0.93	1.42	0.12	0.02	0.17	35	40	55	5	1	7	12.206	3.609	1.23937e-07	4.95281e-06	up	NW_018743850.1	5604338	5607035	-	LOC110686079	--	K23288 syndetin | (RefSeq) uncharacterized LOC105761952 (A)	uncharacterized protein LOC110686079 [Chenopodium quinoa]	--	SubName: Full=Putative gag-polypeptide of LTR copia-type {ECO:0000313|EMBL:OTF95102.1};	FOG: Transposon-encoded proteins with TYA, reverse transcriptase, integrase domains in various combinations	--	gag-polypeptide of LTR copia-type
gene-LOC110686080	0.34	0.93	0.79	2.7	6.99	1.95	16	43	33	117	316	88	0.224	-2.158	3.91537e-05	0.000739118	down	NW_018743850.1	5608434	5611960	+	LOC110686080	--	K00688 glycogen phosphorylase [EC:2.4.1.1] | (RefSeq) glycogen phosphorylase 1-like (A)	ACT domain-containing protein ACR4-like [Chenopodium quinoa]	RecName: Full=ACT domain-containing protein ACR4 {ECO:0000305}; AltName: Full=Protein ACT DOMAIN REPEATS 4 {ECO:0000303|PubMed:12481063};	SubName: Full=Uncharacterized protein {ECO:0000313|EMBL:KNA07849.1};	--	GO:0009506,plasmodesma	ACT domain
gene-LOC110686087	44.66	28.58	27.09	9.83	6.37	9.45	801	502	428	161	109	161	4.97	2.313	4.11188e-10	2.70101e-08	up	NW_018743850.1	5730696	5731575	+	LOC110686087	--	K02553 regulator of ribonuclease activity A | (RefSeq) uncharacterized protein LOC107262668 (A)	putative 4-hydroxy-4-methyl-2-oxoglutarate aldolase 3 [Chenopodium quinoa]	RecName: Full=Putative 4-hydroxy-4-methyl-2-oxoglutarate aldolase 3; Short=HMG aldolase 3; EC=4.1.3.17; AltName: Full=Oxaloacetate decarboxylase; Short=OAA decarboxylase; EC=4.1.1.3; AltName: Full=Regulator of ribonuclease activity homolog 3; AltName: Full=RraA-like protein 3;	RecName: Full=4-hydroxy-4-methyl-2-oxoglutarate aldolase {ECO:0000256|RuleBase:RU004338}; Short=HMG aldolase {ECO:0000256|RuleBase:RU004338}; EC=4.1.1.3 {ECO:0000256|RuleBase:RU004338}; EC=4.1.3.17 {ECO:0000256|RuleBase:RU004338}; AltName: Full=Oxaloacetate decarboxylase {ECO:0000256|RuleBase:RU004338};	--	GO:0047443,4-hydroxy-4-methyl-2-oxoglutarate aldolase activity; GO:0046872,metal ion binding; GO:0008948,oxaloacetate decarboxylase activity; GO:0008428,ribonuclease inhibitor activity; GO:0051252,regulation of RNA metabolic process	Aldolase/RraA
gene-LOC110686088	0.11	0.41	0.25	0.95	1.25	1.06	3	11	6	24	33	28	0.287	-1.802	0.00380001	0.0282837	down	NW_018743850.1	5753086	5755246	-	LOC110686088	--	--	uncharacterized protein LOC110686088 [Chenopodium quinoa]	--	SubName: Full=Uncharacterized protein {ECO:0000313|EMBL:OAY50141.1};	--	GO:0006950,response to stress	Universal stress protein family
gene-LOC110686140	0.14	0.25	0.14	2.39	2.84	1.01	6	10	5	91	113	40	0.107	-3.221	1.91185e-08	9.16431e-07	down	NW_018743850.1	6548600	6559294	-	LOC110686140	--	K12835 ATP-dependent RNA helicase DDX42 [EC:3.6.4.13] | (RefSeq) DEAD-box ATP-dependent RNA helicase 24 isoform X1 (A)	probable WRKY transcription factor 57 [Chenopodium quinoa]	RecName: Full=Probable WRKY transcription factor 57; AltName: Full=WRKY DNA-binding protein 57;	SubName: Full=Uncharacterized protein {ECO:0000313|EMBL:KNA12411.1};	--	GO:0005634,nucleus; GO:0003700,DNA-binding transcription factor activity; GO:0043565,sequence-specific DNA binding; GO:0044212,transcription regulatory region DNA binding; GO:0006970,response to osmotic stress; GO:0009651,response to salt stress; GO:0009414,response to water deprivation; GO:0006351,transcription, DNA-templated	WRKY DNA -binding domain
gene-LOC110686166	81.79	67.97	98.3	17.78	19.24	22.09	2432	1979	2575	483	546	624	5.287	2.402	2.14746e-21	7.33781e-19	up	NW_018743850.1	6973887	6975945	-	LOC110686166	--	K08235 xyloglucan:xyloglucosyl transferase [EC:2.4.1.207] | (RefSeq) probable xyloglucan endotransglucosylase/hydrolase protein 6 (A)	probable xyloglucan endotransglucosylase/hydrolase protein 6 [Chenopodium quinoa]	RecName: Full=Probable xyloglucan endotransglucosylase/hydrolase protein 7; Short=At-XTH7; Short=XTH-7; EC=2.4.1.207; Flags: Precursor;	RecName: Full=Xyloglucan endotransglucosylase/hydrolase {ECO:0000256|RuleBase:RU361120}; EC=2.4.1.207 {ECO:0000256|RuleBase:RU361120};	--	GO:0048046,apoplast; GO:0005618,cell wall; GO:0004553,hydrolase activity, hydrolyzing O-glycosyl compounds; GO:0016762,xyloglucan:xyloglucosyl transferase activity; GO:0042546,cell wall biogenesis; GO:0071555,cell wall organization; GO:0010411,xyloglucan metabolic process	Glycosyl hydrolases family 16
gene-LOC110686174	0.85	1.81	1.82	3.77	8.08	3.17	59	124	112	240	538	210	0.378	-1.405	0.000425264	0.00516263	down	NW_018743850.1	7144179	7152152	-	LOC110686174	--	K19001 ATP-dependent DNA helicase | (RefSeq) ATP-dependent DNA helicase DDM1-like (A)	ATP-dependent DNA helicase DDM1-like [Chenopodium quinoa]	RecName: Full=ATP-dependent DNA helicase DDM1; EC=3.6.4.12; AltName: Full=Protein CHROMATIN REMODELING 1 {ECO:0000303|PubMed:16547115}; Short=AtCHR1; Short=CHR01; AltName: Full=Protein DECREASED DNA METHYLATION 1; Short=AtDDM1; AltName: Full=Protein SOMNIFEROUS 1; AltName: Full=SWI/SNF2-related matrix-associated actin-dependent regulator of chromatin DDM1;	SubName: Full=Uncharacterized protein {ECO:0000313|EMBL:KNA17058.1};	Chromatin remodeling complex WSTF-ISWI, small subunit	GO:0000786,nucleosome; GO:0005634,nucleus; GO:0005524,ATP binding; GO:0004003,ATP-dependent DNA helicase activity; GO:0016887,ATPase activity; GO:0003677,DNA binding; GO:0009294,DNA mediated transformation; GO:0006344,maintenance of chromatin silencing; GO:0006346,methylation-dependent chromatin silencing; GO:0090241,negative regulation of histone H4 acetylation; GO:0051574,positive regulation of…	SNF2 family N-terminal domain
gene-LOC110686175	1.66	1.34	1.43	31.78	25.26	24.93	62	49	47	1082	899	883	0.068	-3.871	3.03878e-46	8.08424e-43	down	NW_018743850.1	7154252	7157696	-	LOC110686175	--	--	sulfite exporter TauE/SafE family protein 3-like [Chenopodium quinoa]	RecName: Full=Sulfite exporter TauE/SafE family protein 3 {ECO:0000312|EMBL:AEC07746.1};	SubName: Full=Uncharacterized protein {ECO:0000313|EMBL:KNA17059.1};	--	GO:0016021,integral component of membrane	Sulfite exporter TauE/SafE
gene-LOC110686178	0.35	0.46	0.63	0	0.18	0	10	13	16	0	5	0	10.324	3.368	0.00558616	0.0378078	up	NW_018743850.1	7199996	7202594	-	LOC110686178	--	--	putative F-box protein At3g23950 [Chenopodium quinoa]	RecName: Full=F-box protein At5g07610;	SubName: Full=Uncharacterized protein {ECO:0000313|EMBL:KNA25779.1};	--	--	F-box-like
gene-LOC110686199	11	13.08	9.98	5.93	3.54	6.09	599	698	479	295	184	315	2.703	1.435	4.68728e-06	0.000121742	up	NW_018743850.1	7419430	7422102	+	LOC110686199	--	K14494 DELLA protein | (RefSeq) DELLA protein GAI (A)	scarecrow-like protein 15 [Chenopodium quinoa]	RecName: Full=Scarecrow-like protein 15; Short=AtSCL15; AltName: Full=GRAS family protein 25; Short=AtGRAS-25;	SubName: Full=Uncharacterized protein {ECO:0000313|EMBL:KMS95202.1};	--	GO:0005634,nucleus; GO:0003700,DNA-binding transcription factor activity; GO:0043565,sequence-specific DNA binding; GO:0030154,cell differentiation; GO:0048831,regulation of shoot system development; GO:0006355,regulation of transcription, DNA-templated; GO:0006351,transcription, DNA-templated	GRAS domain family
gene-LOC110686206	1.73	3.29	1.26	3.92	8.39	6.5	86	160	55	178	398	307	0.417	-1.262	0.0018867	0.0166124	down	NW_018743850.1	7511782	7516011	-	LOC110686206	--	K00889 1-phosphatidylinositol-4-phosphate 5-kinase [EC:2.7.1.68] | (RefSeq) phosphatidylinositol 4-phosphate 5-kinase 6-like (A)	protein ACCELERATED CELL DEATH 6-like isoform X1 [Chenopodium quinoa]	RecName: Full=Protein ACCELERATED CELL DEATH 6 {ECO:0000303|PubMed:10488236};	SubName: Full=Uncharacterized protein {ECO:0000313|EMBL:KNA14727.1};	FOG: Ankyrin repeat	GO:0030176,integral component of endoplasmic reticulum membrane; GO:0005887,integral component of plasma membrane; GO:0016020,membrane; GO:0008219,cell death; GO:0071446,cellular response to salicylic acid stimulus; GO:0009816,defense response to bacterium, incompatible interaction; GO:1900426,positive regulation of defense response to bacterium; GO:1902290,positive regulation of defense response…	Ankyrin repeats (3 copies)
gene-LOC110686207	47.56	35.13	33.73	14.72	17.58	4.91	1479	1070	924	418	522	145	4.101	2.036	2.01295e-06	5.80827e-05	up	NW_018742292.1	1209895	1217464	+	LOC110686207	--	K02116 ATP synthase protein I | (RefSeq) uncharacterized protein LOC110686207 (A)	uncharacterized protein LOC110686207 [Chenopodium quinoa]	--	SubName: Full=Uncharacterized protein {ECO:0000313|EMBL:KMS99284.1};	--	GO:0009534,chloroplast thylakoid; GO:0016021,integral component of membrane; GO:0033614,chloroplast proton-transporting ATP synthase complex assembly	--
gene-LOC110686208	0.24	0.03	0.14	1.6	1.88	0.83	8	1	4	48	59	26	0.127	-2.982	6.12529e-05	0.00107157	down	NW_018743850.1	7517652	7519879	-	LOC110686208	--	K15503 serine/threonine-protein phosphatase 6 regulatory ankyrin repeat subunit B | (RefSeq) hypothetical protein (A)	protein ACCELERATED CELL DEATH 6-like [Chenopodium quinoa]	RecName: Full=Protein ACCELERATED CELL DEATH 6 {ECO:0000303|PubMed:10488236};	SubName: Full=Uncharacterized protein {ECO:0000313|EMBL:KNA14726.1};	FOG: Ankyrin repeat	GO:0030176,integral component of endoplasmic reticulum membrane; GO:0005887,integral component of plasma membrane; GO:0016020,membrane; GO:0008219,cell death; GO:0071446,cellular response to salicylic acid stimulus; GO:0009816,defense response to bacterium, incompatible interaction; GO:1900426,positive regulation of defense response to bacterium; GO:1902290,positive regulation of defense response…	Ankyrin repeats (3 copies)
gene-LOC110686218	4.01	4.7	3.22	2.73	2.17	1.09	116	133	82	72	60	30	2.524	1.336	0.000711798	0.00777968	up	NW_018743850.1	7662745	7673893	-	LOC110686218	--	--	elongation of fatty acids protein 3-like [Chenopodium quinoa]	RecName: Full=Elongation of fatty acids protein 3-like; Short=Protein ELO3-like; EC=2.3.1.-; AltName: Full=Protein HIGH EXPRESSION OF OSMOTICALLY RESPONSIVE GENES 3; AltName: Full=Very long-chain fatty acid condensing enzyme HOS3; Short=VLCFA condensing enzyme HOS3;	SubName: Full=Uncharacterized protein {ECO:0000313|EMBL:KNA15430.1};	Fatty acyl-CoA elongase/Polyunsaturated fatty acid specific elongation enzyme	GO:0030176,integral component of endoplasmic reticulum membrane; GO:0009922,fatty acid elongase activity; GO:0071215,cellular response to abscisic acid stimulus; GO:0030497,fatty acid elongation; GO:0034625,fatty acid elongation, monounsaturated fatty acid; GO:0034626,fatty acid elongation, polyunsaturated fatty acid; GO:0019367,fatty acid elongation, saturated fatty acid; GO:0030148,sphingolipid…	GNS1/SUR4 family
gene-LOC110686231	9.01	10.94	13.34	4.24	4.36	4.38	470	559	613	202	217	217	3.201	1.679	2.14297e-15	3.2711e-13	up	NW_018743850.1	7827304	7830599	-	LOC110686231	--	--	BTB/POZ domain-containing protein At3g50780-like [Chenopodium quinoa]	RecName: Full=BTB/POZ domain-containing protein At3g50780;	SubName: Full=Uncharacterized protein {ECO:0000313|EMBL:EEE90645.1};	--	GO:0016567,protein ubiquitination	BTB/POZ domain
gene-LOC110686233	0.05	0.05	0	0.46	1.46	0.44	1	1	0	9	30	9	0.053	-4.225	0.00182943	0.0162308	down	NW_018742292.1	1574025	1585334	+	LOC110686233	--	K13413 mitogen-activated protein kinase kinase 4/5 [EC:2.7.12.2] | (RefSeq) mitogen-activated protein kinase kinase 5-like (A)	protein LIGHT-DEPENDENT SHORT HYPOCOTYLS 10-like [Chenopodium quinoa]	RecName: Full=Protein LIGHT-DEPENDENT SHORT HYPOCOTYLS 10; AltName: Full=Protein ORGAN BOUNDARY 10;	SubName: Full=Uncharacterized protein {ECO:0000313|EMBL:KNA05755.1};	--	GO:0005634,nucleus; GO:0003677,DNA binding; GO:0009299,mRNA transcription; GO:0007275,multicellular organism development; GO:0090698,post-embryonic plant morphogenesis; GO:0006355,regulation of transcription, DNA-templated; GO:0009416,response to light stimulus	Protein of unknown function (DUF640)
gene-LOC110686270	0.04	0.12	0.13	0.39	0.76	0.54	2	6	6	18	37	26	0.215	-2.215	0.00139691	0.0132285	down	NW_018743850.1	1847880	1852762	+	LOC110686270	--	--	--	--	--	--	--	--
gene-LOC110686281	2.53	2.85	3.36	0.53	1.01	1.19	47	52	55	9	18	21	3.998	1.999	1.12109e-05	0.000255366	up	NW_018743850.1	2615840	2616856	+	LOC110686281	--	K20098 DNA excision repair protein ERCC-6-like 2 [EC:3.6.4.-] | (RefSeq) DNA repair and recombination RAD26-like protein, putative (A)	O-acyltransferase WSD1-like [Chenopodium quinoa]	RecName: Full=O-acyltransferase WSD1; AltName: Full=Diacylglycerol O-acyltransferase; Short=DGAT; EC=2.3.1.20; AltName: Full=Long-chain-alcohol O-fatty-acyltransferase; EC=2.3.1.75; AltName: Full=Wax synthase; Short=WS;	SubName: Full=Uncharacterized protein {ECO:0000313|EMBL:KNA12681.1};	--	GO:0005783,endoplasmic reticulum; GO:0005789,endoplasmic reticulum membrane; GO:0016021,integral component of membrane; GO:0005886,plasma membrane; GO:0102966,arachidoyl-CoA:1-dodecanol O-acyltransferase activity; GO:0004144,diacylglycerol O-acyltransferase activity; GO:0047196,long-chain-alcohol O-fatty-acyltransferase activity; GO:0103095,wax ester synthase activity; GO:0019432,triglyceride bio…	Wax ester synthase-like Acyl-CoA acyltransferase domain
gene-LOC110686282	2.79	3.08	3.76	1.65	1.82	1.75	37	40	44	20	23	22	2.316	1.212	0.00255843	0.0209334	up	NW_018743850.1	2617598	2619408	+	LOC110686282	--	--	uncharacterized protein LOC110686282 [Chenopodium quinoa]	--	SubName: Full=Uncharacterized protein {ECO:0000313|EMBL:KNA12680.1};	--	GO:0004144,diacylglycerol O-acyltransferase activity; GO:0045017,glycerolipid biosynthetic process	Protein of unknown function (DUF1298)
gene-LOC110686350	0	0	0	0.33	0.51	0.89	0	0	0	5	8	14	0.025	-5.316	0.00167505	0.0152015	down	NW_018743858.1	4989828	4991068	-	LOC110686350	--	K03260 translation initiation factor 4G | (RefSeq) uncharacterized LOC107844414 (A)	uncharacterized protein LOC110686350 [Chenopodium quinoa]	--	SubName: Full=Uncharacterized protein {ECO:0000313|EMBL:KNA05629.1}; Flags: Fragment;	FOG: Transposon-encoded proteins with TYA, reverse transcriptase, integrase domains in various combinations	--	gag-polypeptide of LTR copia-type
gene-LOC110686357	0	0	0	0.06	0.41	0.06	0	0	0	3	21	3	0.027	-5.2	0.00618888	0.0407469	down	NW_018743858.1	427903	430653	+	LOC110686357	--	K09419 heat shock transcription factor, other eukaryote | (RefSeq) heat stress transcription factor B-4-like (A)	heat stress transcription factor B-4-like [Chenopodium quinoa]	RecName: Full=Heat stress transcription factor B-4; Short=AtHsfB4; AltName: Full=AtHsf-02;	SubName: Full=Uncharacterized protein {ECO:0000313|EMBL:KNA11960.1};	Heat shock transcription factor	GO:0005737,cytoplasm; GO:0005634,nucleus; GO:0003700,DNA-binding transcription factor activity; GO:0043565,sequence-specific DNA binding; GO:0008356,asymmetric cell division; GO:0006351,transcription, DNA-templated	HSF-type DNA-binding
gene-LOC110686367	0	0	0	17.87	14.14	16.72	0	0	0	335	277	326	0.001	-10.434	9.78145e-18	1.91742e-15	down	NW_018743858.1	679926	682907	-	LOC110686367	--	--	--	--	--	--	--	--
gene-LOC110686376	8.07	7.4	5.5	0	0	0	215	193	129	0	0	0	1207.38	10.238	9.16524e-17	1.64115e-14	up	NW_018743858.1	1109949	1117228	-	LOC110686376	--	K22522 cytokinin riboside 5'-monophosphate phosphoribohydrolase [EC:3.2.2.-] | (RefSeq) probable cytokinin riboside 5'-monophosphate phosphoribohydrolase LOGL10 isoform X1 (A)	probable cytokinin riboside 5'-monophosphate phosphoribohydrolase LOGL10 isoform X1 [Chenopodium quinoa]	RecName: Full=Cytokinin riboside 5'-monophosphate phosphoribohydrolase LOG7; EC=3.2.2.n1; AltName: Full=Protein LONELY GUY 7;	RecName: Full=Cytokinin riboside 5'-monophosphate phosphoribohydrolase {ECO:0000256|RuleBase:RU363015}; EC=3.2.2.n1 {ECO:0000256|RuleBase:RU363015};	--	GO:0005829,cytosol; GO:0005634,nucleus; GO:0016787,hydrolase activity; GO:0009691,cytokinin biosynthetic process	Possible lysine decarboxylase
gene-LOC110686387	0	0	0	0.01	0.62	0.09	0	0	0	1	50	7	0.013	-6.278	0.000984523	0.0100462	down	NW_018743858.1	1832115	1837170	+	LOC110686387	--	--	--	--	--	--	--	--
gene-LOC110686394	1.44	1.73	1.77	4.79	6.07	5.57	64	75	69	194	257	235	0.376	-1.409	2.10539e-09	1.20639e-07	down	NW_018743858.1	2187700	2197730	-	LOC110686394	--	K13513 lysocardiolipin and lysophospholipid acyltransferase [EC:2.3.1.- 2.3.1.51] | (RefSeq) probable 1-acyl-sn-glycerol-3-phosphate acyltransferase 5 (A)	probable 1-acyl-sn-glycerol-3-phosphate acyltransferase 5 [Chenopodium quinoa]	RecName: Full=Probable 1-acyl-sn-glycerol-3-phosphate acyltransferase 4; EC=2.3.1.51; AltName: Full=Lysophosphatidyl acyltransferase 4;	SubName: Full=Uncharacterized protein {ECO:0000313|EMBL:KNA10418.1};	Lysophosphatidic acid acyltransferase LPAAT and related acyltransferases	GO:0016021,integral component of membrane; GO:0003841,1-acylglycerol-3-phosphate O-acyltransferase activity; GO:0016024,CDP-diacylglycerol biosynthetic process	Acyltransferase
gene-LOC110686416	0.1	0	0	2.34	1.17	0.96	1	0	0	21	11	9	0.032	-4.96	0.000923278	0.00952562	down	NW_018743858.1	3154071	3154806	+	LOC110686416	--	--	--	--	--	--	--	--
gene-LOC110686431	0.8	2.11	1.02	4.01	6.73	3.11	51	131	57	232	407	187	0.355	-1.492	0.000165719	0.0024035	down	NW_018743858.1	4419546	4424707	+	LOC110686431	--	K22382 WD repeat-containing protein 26 | (RefSeq) WD repeat-containing protein 26 homolog (A)	growth-regulating factor 1-like isoform X1 [Chenopodium quinoa]	RecName: Full=Growth-regulating factor 1; Short=AtGRF1; AltName: Full=Transcription activator GRF1;	SubName: Full=Growth-regulating factor 1 {ECO:0000313|EMBL:EOY15657.1};	--	GO:0005634,nucleus; GO:0005524,ATP binding; GO:0043565,sequence-specific DNA binding; GO:0019760,glucosinolate metabolic process; GO:0061062,regulation of nematode larval development; GO:0006355,regulation of transcription, DNA-templated; GO:0009624,response to nematode; GO:0048364,root development; GO:0006351,transcription, DNA-templated	WRC
gene-LOC110686448	339.89	186.97	250.48	103.03	75.57	150.62	4641	2500	3013	1285	985	1954	2.983	1.577	7.34843e-05	0.00124689	up	NW_018743858.1	4949454	4951633	+	LOC110686448	--	--	gibberellin-regulated protein 1-like [Chenopodium quinoa]	RecName: Full=Gibberellin-regulated protein 1; AltName: Full=GAST1 protein homolog 1; Flags: Precursor;	SubName: Full=Uncharacterized protein {ECO:0000313|EMBL:KNA07106.1};	--	GO:0005618,cell wall; GO:0005576,extracellular region; GO:0009505,plant-type cell wall; GO:0009740,gibberellic acid mediated signaling pathway; GO:0009737,response to abscisic acid; GO:0009741,response to brassinosteroid; GO:0009739,response to gibberellin; GO:0009826,unidimensional cell growth	Gibberellin regulated protein
gene-LOC110686450	0	0.04	0	1.16	0.58	0.25	0	2	0	53	28	12	0.026	-5.287	7.02397e-05	0.00120174	down	NW_018743858.1	4984954	4987605	+	LOC110686450	--	--	uncharacterized protein LOC110686450 [Chenopodium quinoa]	--	SubName: Full=Uncharacterized protein {ECO:0000313|EMBL:KNA12732.1};	--	--	Amiloride-sensitive sodium channel
gene-LOC110686474	0	0	0.07	0.54	1.03	0.32	0	0	1	8	16	5	0.047	-4.398	0.00557625	0.0377823	down	NW_018743858.1	1521166	1521966	+	LOC110686474	--	K14486 auxin response factor | (RefSeq) auxin response factor 9-like (A)	auxin response factor 17-like [Chenopodium quinoa]	RecName: Full=Auxin response factor 17;	RecName: Full=Auxin response factor {ECO:0000256|RuleBase:RU004561};	--	GO:0005634,nucleus; GO:0003700,DNA-binding transcription factor activity; GO:0000987,proximal promoter sequence-specific DNA binding; GO:0048830,adventitious root development; GO:0009653,anatomical structure morphogenesis; GO:0009734,auxin-activated signaling pathway; GO:0052543,callose deposition in cell wall; GO:0009555,pollen development; GO:0010208,pollen wall assembly; GO:0006355,regulation …	B3 DNA binding domain
gene-LOC110686490	0	0	0	20.05	17.86	14.34	0	0	0	203	189	151	0.001	-9.633	3.1318e-15	4.72242e-13	down	NW_018743863.1	1109554	1110643	-	LOC110686490	--	--	--	--	--	--	--	--
gene-LOC110686496	0.01	0.06	0.07	0.26	0.43	0.17	1	6	6	23	40	16	0.206	-2.28	0.00312042	0.0244777	down	NW_018743863.1	245591	250769	-	LOC110686496	--	--	uncharacterized protein LOC110686496 [Chenopodium quinoa]	--	SubName: Full=Putative transposase, Ptta/En/Spm, plant {ECO:0000313|EMBL:OTG13614.1};	--	--	--
gene-LOC110686499	0	0.03	0	0.98	3.11	0.55	0	1	0	34	113	20	0.008	-6.89	9.44131e-07	3.00508e-05	down	NW_018743863.1	530988	533532	+	LOC110686499	--	--	--	--	--	--	--	--
gene-LOC110686569	4.65	5.88	2.05	11.9	13.4	12.91	80	99	31	187	220	211	0.414	-1.271	0.00130425	0.0125392	down	NW_018743878.1	1806010	1807076	+	LOC110686569	--	--	--	--	--	--	--	--
gene-LOC110686616	0.37	0.37	0.61	0.08	0.03	0	15	15	22	3	1	0	16.212	4.019	9.76068e-05	0.00156929	up	NW_018743893.1	1042903	1047596	-	LOC110686616	--	--	--	--	--	--	--	--
gene-LOC110686622	43.98	36.6	40.61	18.26	16.48	18.44	1529	1246	1244	580	547	609	2.878	1.525	7.28436e-11	5.57096e-09	up	NW_018743893.1	33397	36957	-	LOC110686622	--	K00766 anthranilate phosphoribosyltransferase [EC:2.4.2.18] | (RefSeq) anthranilate phosphoribosyltransferase, chloroplastic-like (A)	anthranilate phosphoribosyltransferase, chloroplastic-like [Chenopodium quinoa]	RecName: Full=Anthranilate phosphoribosyltransferase, chloroplastic; EC=2.4.2.18; Flags: Precursor;	SubName: Full=Uncharacterized protein {ECO:0000313|EMBL:KNA14878.1};	Anthranilate phosphoribosyltransferase	GO:0009507,chloroplast; GO:0009941,chloroplast envelope; GO:0009570,chloroplast stroma; GO:0009536,plastid; GO:0004048,anthranilate phosphoribosyltransferase activity; GO:0000162,tryptophan biosynthetic process	Glycosyl transferase family, a/b domain
gene-LOC110686624	0.31	0.38	1	3.36	2.69	3.5	5	6	14	49	41	53	0.217	-2.207	0.000159463	0.00233642	down	NW_018743893.1	26876	33042	+	LOC110686624	--	K03676 glutaredoxin 3 | (RefSeq) glutaredoxin-like (A)	glutaredoxin-like [Chenopodium quinoa]	RecName: Full=Glutaredoxin;	SubName: Full=Uncharacterized protein {ECO:0000313|EMBL:KNA14879.1};	Glutaredoxin and related proteins	GO:0005737,cytoplasm; GO:0009055,electron transfer activity; GO:0015035,protein disulfide oxidoreductase activity; GO:0045454,cell redox homeostasis	Glutaredoxin
gene-LOC110686627	18.07	12.58	14.16	7.46	8.78	8.79	597	407	412	225	277	276	2.288	1.194	2.20479e-05	0.000454188	up	NW_018743893.1	60438	67154	-	LOC110686627	--	K06195 ApaG protein | (RefSeq) uncharacterized protein LOC109816810 isoform X1 (A)	uncharacterized protein LOC110686627 [Chenopodium quinoa]	RecName: Full=F-box protein SKIP16; AltName: Full=SKP1-interacting partner 16;	SubName: Full=Uncharacterized protein {ECO:0000313|EMBL:KNA25754.1};	Putative Mg2+ and Co2+ transporter CorD	GO:0019005,SCF ubiquitin ligase complex; GO:0016567,protein ubiquitination	ApaG domain
gene-LOC110686637	2.92	2.39	2.37	11.97	26.4	12.21	35	28	25	131	302	139	0.197	-2.341	5.93011e-09	3.09337e-07	down	NW_018743893.1	268876	269777	+	LOC110686637	--	--	--	--	--	--	--	--
gene-LOC110686639	2.35	2.06	1.81	10.65	6.27	4.06	84	72	57	348	214	138	0.376	-1.411	0.000678379	0.00751027	down	NW_018743893.1	274072	277234	+	LOC110686639	--	--	probable inactive poly [ADP-ribose]	RecName: Full=Probable inactive poly [ADP-ribose] polymerase SRO5; AltName: Full=Protein SIMILAR TO RCD ONE 5;	SubName: Full=Uncharacterized protein {ECO:0000313|EMBL:KNA25042.1};	--	GO:0005739,mitochondrion; GO:0016363,nuclear matrix; GO:0003950,NAD+ ADP-ribosyltransferase activity; GO:0007275,multicellular organism development; GO:0072593,reactive oxygen species metabolic process; GO:0009651,response to salt stress	RCD1-SRO-TAF4 (RST) plant domain
gene-LOC110686644	0	0	0	0.62	0.64	0.69	0	0	0	13	14	15	0.016	-5.944	5.8029e-05	0.00102696	down	NW_018743893.1	327237	329534	+	LOC110686644	--	--	uncharacterized protein LOC110686644 [Chenopodium quinoa]	--	--	--	--	--
gene-LOC110686648	14.55	10.21	18.73	6.88	7.04	7.99	924	635	1048	399	427	482	2.509	1.327	1.30225e-05	0.000291131	up	NW_018743893.1	362023	365867	-	LOC110686648	--	K01087 trehalose 6-phosphate phosphatase [EC:3.1.3.12] | (RefSeq) trehalose-phosphate phosphatase A-like (A)	protein KINESIN LIGHT CHAIN-RELATED 3-like [Chenopodium quinoa]	RecName: Full=Protein KINESIN LIGHT CHAIN-RELATED 2 {ECO:0000303|PubMed:23204523}; AltName: Full=Kinesin light chain-like protein 1 {ECO:0000303|Ref.1}; Short=AtKLC1 {ECO:0000303|Ref.1};	SubName: Full=Uncharacterized protein {ECO:0000313|EMBL:KNA08306.1}; Flags: Fragment;	Kinesin light chain	GO:0005886,plasma membrane; GO:0009860,pollen tube growth; GO:0031347,regulation of defense response	Tetratricopeptide repeat
gene-LOC110686649	0.94	2.53	3.09	4.6	7.82	5.04	42	110	121	187	332	213	0.465	-1.105	0.00635706	0.0415895	down	NW_018743893.1	375926	382907	-	LOC110686649	--	K01968 3-methylcrotonyl-CoA carboxylase alpha subunit [EC:6.4.1.4] | (RefSeq) LOW QUALITY PROTEIN: methylcrotonoyl-CoA carboxylase subunit alpha, mitochondrial-like (A)	serine/threonine-protein kinase HT1-like [Chenopodium quinoa]	RecName: Full=Serine/threonine-protein kinase HT1; EC=2.7.11.1; AltName: Full=High leaf temperature protein 1;	SubName: Full=Uncharacterized protein {ECO:0000313|EMBL:KNA08307.1};	Tyrosine kinase specific for activated (GTP-bound) p21cdc42Hs	GO:0005737,cytoplasm; GO:0005524,ATP binding; GO:0004672,protein kinase activity; GO:0004674,protein serine/threonine kinase activity; GO:0004871,NA; GO:0035556,intracellular signal transduction	Protein tyrosine kinase
gene-LOC110686655	1369.37	2032.53	1022.33	453.71	368.47	1078.34	51127	74313	33626	15472	13133	38252	2.815	1.493	0.00113691	0.0112476	up	NW_018743893.1	454883	460450	-	LOC110686655	--	K13366 polyamine oxidase [EC:1.5.3.14 1.5.3.16 1.5.3.-] | (RefSeq) polyamine oxidase-like (A)	polyamine oxidase-like [Chenopodium quinoa]	RecName: Full=Polyamine oxidase; EC=1.5.3.14; EC=1.5.3.15; Flags: Precursor;	SubName: Full=Polyamine oxidase {ECO:0000313|EMBL:AAM43922.1}; EC=1.4.3.4 {ECO:0000313|EMBL:AAM43922.1};	Amine oxidase	GO:0052898,N1-acetylspermidine:oxygen oxidoreductase (propane-1,3-diamine-forming) activity; GO:0052893,N1-acetylspermine:oxygen oxidoreductase (propane-1,3-diamine-forming) activity; GO:0052897,N8-acetylspermidine:oxygen oxidoreductase (propane-1,3-diamine-forming) activity; GO:0052896,spermidine oxidase (propane-1,3-diamine-forming) activity; GO:0052900,spermine oxidase (propane-1,3-diamine-for…	Flavin containing amine oxidoreductase
gene-LOC110686657	2283.79	2194.98	1244.04	465.48	565.48	839.87	29974	28211	14384	5580	7085	10473	3.841	1.941	6.64256e-08	2.83069e-06	up	NW_018743893.1	549792	553755	-	LOC110686657	--	--	uncharacterized protein LOC110686657 [Chenopodium quinoa]	RecName: Full=Trypsin inhibitor 1; AltName: Full=SOTI I; AltName: Full=Trypsin inhibitor I;	SubName: Full=Uncharacterized protein {ECO:0000313|EMBL:KNA13658.1};	--	GO:0004867,serine-type endopeptidase inhibitor activity	Trypsin inhibitors 1,2 and 3
gene-LOC110686685	0.12	0.06	0.17	0	0	0	8	4	10	0	0	0	50.766	5.666	0.000799914	0.00855377	up	NW_018743893.1	911941	916603	+	LOC110686685	--	--	--	--	--	--	--	--
gene-LOC110686689	4.49	6.97	9.76	2.42	3.36	1.09	213	324	408	105	152	49	3.921	1.971	1.69327e-06	4.98546e-05	up	NW_018743893.1	1017207	1027465	-	LOC110686689	--	K12862 pleiotropic regulator 1 | (RefSeq) uncharacterized protein LOC9311097 (A)	protease Do-like 9 [Chenopodium quinoa]	RecName: Full=Protease Do-like 9; EC=3.4.21.-;	SubName: Full=Uncharacterized protein {ECO:0000313|EMBL:KDP31134.1};	Serine protease	GO:0009507,chloroplast; GO:0005730,nucleolus; GO:0004252,serine-type endopeptidase activity	PDZ domain
gene-LOC110686715	0.04	0.14	0.47	0	0	0	2	7	21	0	0	0	68.372	6.095	0.000641464	0.00718968	up	NW_018743893.1	1316465	1319251	-	LOC110686715	--	K04079 molecular chaperone HtpG | (RefSeq) F-box/kelch-repeat protein At3g06240-like (A)	F-box/kelch-repeat protein At3g23880-like [Chenopodium quinoa]	RecName: Full=F-box protein CPR1; AltName: Full=Protein CONSTITUTIVE EXPRESSER OF PR GENES 1; AltName: Full=Protein CONSTITUTIVE EXPRESSER OF PR GENES 30 {ECO:0000303|PubMed:19682297};	SubName: Full=Uncharacterized protein {ECO:0000313|EMBL:KNA20051.1};	--	GO:0005737,cytoplasm; GO:0005634,nucleus; GO:0004842,ubiquitin-protein transferase activity; GO:0031348,negative regulation of defense response; GO:0042177,negative regulation of protein catabolic process; GO:0009626,plant-type hypersensitive response; GO:0031146,SCF-dependent proteasomal ubiquitin-dependent protein catabolic process	F-box associated domain
gene-LOC110686716	204.5	122.18	169.54	61.13	46.25	74.84	8073	4723	5896	2204	1743	2807	3.444	1.784	2.60369e-07	9.61777e-06	up	NW_018743893.1	1335302	1340873	+	LOC110686716	--	K00130 betaine-aldehyde dehydrogenase [EC:1.2.1.8] | (RefSeq) betaine aldehyde dehydrogenase, chloroplastic-like (A)	betaine aldehyde dehydrogenase, chloroplastic-like [Chenopodium quinoa]	RecName: Full=Betaine aldehyde dehydrogenase, chloroplastic; Short=BADH; EC=1.2.1.8; Flags: Precursor;	SubName: Full=Betaine aldehyde dehydrogenase {ECO:0000313|EMBL:ALA65446.1};	Aldehyde dehydrogenase	GO:0009507,chloroplast; GO:0008802,betaine-aldehyde dehydrogenase activity; GO:0019285,glycine betaine biosynthetic process from choline	Aldehyde dehydrogenase family
gene-LOC110686725	3.38	4.68	3.07	1.91	1.41	2.06	145	197	116	75	58	84	2.555	1.353	2.47125e-05	0.000500771	up	NW_018743893.1	1503736	1506008	+	LOC110686725	--	K18875 enhanced disease susceptibility 1 protein | (RefSeq) protein EDS1L-like isoform X1 (A)	protein EDS1L-like isoform X1 [Chenopodium quinoa]	RecName: Full=Protein EDS1L {ECO:0000305}; AltName: Full=Enhanced disease susceptibility 1-like;	SubName: Full=Uncharacterized protein {ECO:0000313|EMBL:KNA15078.1};	--	GO:0005783,endoplasmic reticulum; GO:0005634,nucleus; GO:0016787,hydrolase activity; GO:0006952,defense response; GO:0006629,lipid metabolic process	Enhanced disease susceptibility 1 protein EP domain
gene-LOC110686737	71.13	80.98	48	17.5	23.05	22.2	1322	1474	786	297	409	392	4.022	2.008	7.36243e-14	8.90305e-12	up	NW_018743893.1	296882	297793	+	LOC110686737	--	--	uncharacterized protein LOC110686737 [Chenopodium quinoa]	--	SubName: Full=Uncharacterized protein {ECO:0000313|EMBL:KNA25044.1};	--	--	Protein of unknown function (DUF1645)
gene-LOC110686743	1.57	4.13	3.01	0.1	0.07	0.05	72	186	122	4	3	2	51.148	5.677	2.84428e-19	6.62095e-17	up	NW_018743893.1	486220	491760	+	LOC110686743	--	--	--	--	--	--	--	--
gene-LOC110686755	16.18	12.39	13.28	6.45	8.2	8.7	184	138	133	67	89	94	2.279	1.189	0.000137282	0.00208137	up	NW_018743893.1	743793	744350	+	LOC110686755	--	--	uncharacterized protein LOC110686755 [Chenopodium quinoa]	--	SubName: Full=Uncharacterized protein {ECO:0000313|EMBL:KNA17687.1};	--	--	--
gene-LOC110686823	1.81	1.08	2.21	0.47	0.61	0.05	144	84	155	34	46	4	5.975	2.579	0.000119987	0.00186437	up	NW_018743894.1	505260	535578	+	LOC110686823	--	K06962 uncharacterized protein | (RefSeq) uncharacterized protein LOC110686823 (A)	uncharacterized protein LOC110686823 [Chenopodium quinoa]	--	SubName: Full=Uncharacterized protein {ECO:0000313|EMBL:OAY46633.1};	--	--	YacP-like NYN domain
gene-LOC110686827	4.72	1.99	2.04	1.78	0.99	1.54	194	80	74	67	39	60	2.618	1.388	0.00786048	0.0483747	up	NW_018743894.1	869080	871651	+	LOC110686827	--	K00521 ferric-chelate reductase [EC:1.16.1.7] | (RefSeq) ferric reduction oxidase 7, chloroplastic-like (A)	NAC domain-containing protein 43-like [Chenopodium quinoa]	RecName: Full=NAC domain-containing protein 35 {ECO:0000303|PubMed:15029955}; Short=ANAC035 {ECO:0000303|PubMed:15029955}; AltName: Full=Protein LONG VEGETATIVE PHASE 1 {ECO:0000303|PubMed:17653269}; Short=AtLOV1 {ECO:0000303|PubMed:17653269};	SubName: Full=Uncharacterized protein {ECO:0000313|EMBL:KNA20187.1};	--	GO:0005634,nucleus; GO:0003677,DNA binding; GO:0003700,DNA-binding transcription factor activity; GO:0009908,flower development; GO:0006351,transcription, DNA-templated	No apical meristem (NAM) protein
gene-LOC110686832	0.75	0.51	0.9	3.28	3.66	3.41	33	22	35	132	154	143	0.264	-1.923	2.15633e-08	1.0179e-06	down	NW_018743894.1	1947434	1971625	-	LOC110686832	--	--	uncharacterized protein LOC110686832 isoform X1 [Chenopodium quinoa]	--	SubName: Full=Uncharacterized protein {ECO:0000313|EMBL:KNA22348.1};	--	--	Plant transposase (Ptta/En/Spm family)
gene-LOC110686840	0.11	0.41	0.97	0	0	0	2	7	15	0	0	0	54.201	5.76	0.00132826	0.0127306	up	NW_018743894.1	3053054	3058433	+	LOC110686840	--	--	--	--	--	--	--	--
gene-LOC110686842	3.9	0	5.33	0.05	0	0	78	0	94	1	0	0	211.12	7.722	0.00758966	0.0472862	up	NW_018743894.1	3106218	3108928	-	LOC110686842	--	--	--	--	--	--	--	--
gene-LOC110686900	2.52	2.36	3.68	8.45	6.99	7.21	111	102	143	340	294	302	0.473	-1.079	0.000143402	0.00215363	down	NW_018743906.1	188879	192544	-	LOC110686900	--	--	--	--	--	--	--	--
gene-LOC110686906	0.94	1.13	1.28	3.21	2.95	3.14	39	46	47	122	117	124	0.449	-1.156	8.11301e-05	0.00135078	down	NW_018743906.1	265797	274586	-	LOC110686906	--	K00791 tRNA dimethylallyltransferase [EC:2.5.1.75] | (RefSeq) tRNA dimethylallyltransferase 9-like (A)	tRNA dimethylallyltransferase 9-like [Chenopodium quinoa]	RecName: Full=tRNA dimethylallyltransferase 9; EC=2.5.1.75; AltName: Full=Isopentenyl-diphosphate: tRNA isopentenyltransferase 9; Short=AtIPT9; Short=IPP transferase 9; Short=IPPT 9;	SubName: Full=Uncharacterized protein {ECO:0000313|EMBL:KNA03920.1};	tRNA delta(2)-isopentenylpyrophosphate transferase	GO:0005739,mitochondrion; GO:0005524,ATP binding; GO:0052381,tRNA dimethylallyltransferase activity; GO:0009691,cytokinin biosynthetic process; GO:0006400,tRNA modification	IPP transferase
gene-LOC110686917	1.26	2.59	2.66	0	0	0	54	109	101	0	0	0	586.153	9.195	2.76444e-13	3.08269e-11	up	NW_018743906.1	570485	575604	-	LOC110686917	--	--	--	--	--	--	--	--
gene-LOC110686922	0.29	0.56	0.6	0	0	0	14	27	26	0	0	0	149.052	7.22	1.39302e-07	5.48447e-06	up	NW_018743906.1	692713	702505	-	LOC110686922	--	--	uncharacterized protein LOC110686922 [Chenopodium quinoa]	--	SubName: Full=Uncharacterized protein {ECO:0000313|EMBL:KNA05185.1}; Flags: Fragment;	--	--	Plant transposase (Ptta/En/Spm family)
gene-LOC110686944	5.54	20.52	11.88	58.35	201.39	33.41	80	290	151	769	2774	458	0.165	-2.599	1.11379e-05	0.00025403	down	NW_018743906.1	1524218	1524925	+	LOC110686944	--	K11253 histone H3 | (RefSeq) histone H3.2 (A)	PREDICTED: histone H3.2 [Musa acuminata subsp. malaccensis]	RecName: Full=Histone H3.2;	RecName: Full=Histone H3 {ECO:0000256|RuleBase:RU004471};	Histones H3 and H4	GO:0000786,nucleosome; GO:0005634,nucleus; GO:0003677,DNA binding; GO:0046982,protein heterodimerization activity	Core histone H2A/H2B/H3/H4
gene-LOC110686945	2.5	8.66	14.75	34.39	97.41	20.92	36	122	187	452	1338	286	0.216	-2.211	0.000358469	0.00447875	down	NW_018743906.1	1478036	1478741	+	LOC110686945	--	K11253 histone H3 | (RefSeq) histone H3.2 (A)	PREDICTED: histone H3.2 [Musa acuminata subsp. malaccensis]	RecName: Full=Histone H3.2;	RecName: Full=Histone H3 {ECO:0000256|RuleBase:RU004471};	Histones H3 and H4	GO:0000786,nucleosome; GO:0005634,nucleus; GO:0003677,DNA binding; GO:0046982,protein heterodimerization activity	Core histone H2A/H2B/H3/H4
gene-LOC110686951	3.07	3.38	5.38	0.65	0.5	2.51	103	111	159	20	16	80	3.886	1.958	0.00218775	0.0186204	up	NW_018743906.1	1566565	1568960	-	LOC110686951	--	--	uncharacterized protein LOC110686951 [Chenopodium quinoa]	--	SubName: Full=Uncharacterized protein {ECO:0000313|EMBL:KNA17450.1};	--	--	Protein of unknown function (DUF1685)
gene-LOC110686952	29.63	37.92	41.07	8.12	8.62	11.63	1239	1553	1513	310	344	462	4.74	2.245	6.07358e-20	1.51819e-17	up	NW_018743906.1	1650961	1653012	+	LOC110686952	--	K17193 anthocyanidin 3-O-glucoside 2'''-O-xylosyltransferase [EC:2.4.2.51] | (RefSeq) UDP-glycosyltransferase 79B6-like (A)	UDP-glycosyltransferase 79B6-like [Chenopodium quinoa]	RecName: Full=UDP-glycosyltransferase 79B6; EC=2.4.1.-;	SubName: Full=Uncharacterized protein {ECO:0000313|EMBL:KNA22368.1};	UDP-glucuronosyl and UDP-glucosyl transferase	GO:0043231,intracellular membrane-bounded organelle; GO:0080043,quercetin 3-O-glucosyltransferase activity; GO:0080044,quercetin 7-O-glucosyltransferase activity; GO:0035251,UDP-glucosyltransferase activity; GO:0008152,metabolic process	UDP-glucoronosyl and UDP-glucosyl transferase
gene-LOC110686953	1.66	1.83	2.18	0	0	0	26	28	30	0	0	0	189.224	7.564	9.12513e-09	4.59278e-07	up	NW_018743906.1	1670972	1672471	+	LOC110686953	--	--	--	--	--	--	--	--
gene-LOC110686955	0.38	0.5	0.9	2.33	4.82	1.82	17	22	36	96	208	78	0.253	-1.983	4.04245e-05	0.000759131	down	NW_018743906.1	1687516	1692668	-	LOC110686955	--	K18418 ERI1 exoribonuclease 3 [EC:3.1.-.-] | (RefSeq) uncharacterized exonuclease domain-containing protein At3g15140 (A)	uncharacterized exonuclease domain-containing protein At3g15140-like isoform X1 [Chenopodium quinoa]	RecName: Full=Uncharacterized exonuclease domain-containing protein At3g15140; EC=3.1.-.-;	SubName: Full=Uncharacterized protein {ECO:0000313|EMBL:KNA23226.1};	Predicted exonuclease	GO:0005739,mitochondrion; GO:0016891,endoribonuclease activity, producing 5'-phosphomonoesters; GO:0004527,exonuclease activity; GO:0046872,metal ion binding; GO:0003676,nucleic acid binding; GO:0035194,posttranscriptional gene silencing by RNA; GO:0090065,regulation of production of siRNA involved in RNA interference	Exonuclease
gene-LOC110686966	54.3	72.37	49.81	0	0	0	1193	1557	964	0	0	0	8253.45	13.011	2.52908e-27	1.4059e-24	up	NW_018743906.1	2010501	2011578	+	LOC110686966	--	K09286 EREBP-like factor | (RefSeq) ethylene-responsive transcription factor 11-like (A)	ethylene-responsive transcription factor 11-like [Chenopodium quinoa]	RecName: Full=Ethylene-responsive transcription factor 8; Short=AtERF8; AltName: Full=Ethylene-responsive element-binding factor 8; Short=EREBP-8;	SubName: Full=Uncharacterized protein {ECO:0000313|EMBL:KNA16822.1};	--	GO:0005634,nucleus; GO:0003677,DNA binding; GO:0003700,DNA-binding transcription factor activity; GO:0009873,ethylene-activated signaling pathway; GO:0006351,transcription, DNA-templated	AP2 domain
gene-LOC110686978	0.44	0.45	0.59	3.29	2.31	3.71	11	11	13	75	55	88	0.197	-2.347	8.01498e-07	2.60033e-05	down	NW_018743906.1	2242439	2247000	+	LOC110686978	--	K17506 protein phosphatase 1L [EC:3.1.3.16] | (RefSeq) probable protein phosphatase 2C 39 isoform X1 (A)	probable protein phosphatase 2C 39 isoform X1 [Chenopodium quinoa]	RecName: Full=Probable protein phosphatase 2C 39; Short=AtPP2C39; EC=3.1.3.16;	SubName: Full=Uncharacterized protein {ECO:0000313|EMBL:KNA09893.1};	Serine/threonine protein phosphatase	GO:0046872,metal ion binding; GO:0004722,protein serine/threonine phosphatase activity	Protein phosphatase 2C
gene-LOC110686979	0.41	0.45	0.46	0.85	3.4	1.24	11	12	11	21	88	32	0.312	-1.68	0.00765995	0.0475729	down	NW_018743906.1	2250205	2253261	-	LOC110686979	--	K13415 protein brassinosteroid insensitive 1 [EC:2.7.10.1 2.7.11.1] | (RefSeq) uncharacterized protein LOC103413440 isoform X1 (A)	squamosa promoter-binding-like protein 3 [Chenopodium quinoa]	RecName: Full=Squamosa promoter-binding protein 1;	SubName: Full=Uncharacterized protein {ECO:0000313|EMBL:KNA09892.1};	--	GO:0005634,nucleus; GO:0003677,DNA binding; GO:0003700,DNA-binding transcription factor activity; GO:0046872,metal ion binding; GO:0009908,flower development; GO:0006351,transcription, DNA-templated	SBP domain
gene-LOC110686989	0.2	0.15	0.22	2.8	2.57	2.38	4	3	4	52	50	46	0.092	-3.439	1.5152e-08	7.35769e-07	down	NW_018743906.1	657354	658352	-	LOC110686989	--	K02111 F-type H+/Na+-transporting ATPase subunit alpha [EC:7.1.2.2 7.2.2.1] | (RefSeq) LOW QUALITY PROTEIN: uncharacterized protein LOC114822316 (A)	uncharacterized protein LOC110686989 [Chenopodium quinoa]	--	SubName: Full=uncharacterized protein LOC107917414 {ECO:0000313|RefSeq:XP_016702257.1};	--	GO:0003676,nucleic acid binding; GO:0008270,zinc ion binding	gag-polypeptide of LTR copia-type
gene-LOC110687018	6.62	0.49	1.85	0.21	0	0.1	138	10	34	4	0	2	38.524	5.268	4.28535e-06	0.000113117	up	NW_018743909.1	38334	39356	-	LOC110687018	--	--	miraculin-like [Chenopodium quinoa]	RecName: Full=Miraculin; Short=MIR; Flags: Precursor;	SubName: Full=Uncharacterized protein {ECO:0000313|EMBL:KNA03096.1};	--	GO:0004866,endopeptidase inhibitor activity	Trypsin and protease inhibitor
gene-LOC110687041	0.19	0.75	0.1	4.92	5.94	6.22	9	34	4	209	264	275	0.074	-3.758	2.2508e-11	1.92273e-09	down	NW_018743911.1	19626	22250	-	LOC110687041	--	--	--	--	--	--	--	--
gene-LOC110687042	0	0	0.01	0.25	0.27	0.08	0	0	1	19	21	6	0.029	-5.084	0.000711858	0.00777968	down	NW_018743911.1	22272	26521	+	LOC110687042	--	--	--	--	--	--	--	--
gene-LOC110687061	0.45	1.54	2.38	5.21	15.22	3.83	29	98	136	309	943	236	0.228	-2.13	0.000341131	0.00431419	down	NW_018742306.1	494186	499961	-	LOC110687061	--	K10638 E3 ubiquitin-protein ligase UHRF1 [EC:2.3.2.27] | (RefSeq) LOW QUALITY PROTEIN: E3 ubiquitin-protein ligase ORTHRUS 2-like (A)	LOW QUALITY PROTEIN: E3 ubiquitin-protein ligase ORTHRUS 2-like [Chenopodium quinoa]	RecName: Full=E3 ubiquitin-protein ligase ORTHRUS 2; EC=2.3.2.27; AltName: Full=Protein VARIANT IN METHYLATION 1; AltName: Full=RING-type E3 ubiquitin transferase ORTHRUS 2 {ECO:0000305};	SubName: Full=Uncharacterized protein {ECO:0000313|EMBL:KNA21574.1};	--	GO:0010369,chromocenter; GO:0005720,nuclear heterochromatin; GO:0005634,nucleus; GO:0003682,chromatin binding; GO:0010385,double-stranded methylated DNA binding; GO:0042393,histone binding; GO:0046872,metal ion binding; GO:0008327,methyl-CpG binding; GO:0010428,methyl-CpNpG binding; GO:0010429,methyl-CpNpN binding; GO:0061630,ubiquitin protein ligase activity; GO:0004842,ubiquitin-protein transfe…	SAD/SRA domain
gene-LOC110687080	4.27	2.26	1.76	0.81	0.85	1.09	58	30	21	10	11	14	3.907	1.966	0.00123308	0.0119912	up	NW_018743919.1	2051862	2052976	+	LOC110687080	--	K04683 transcription factor Dp-1 | (RefSeq) transcription factor-like protein DPB (A)	nuclear transport factor 2-like [Chenopodium quinoa]	RecName: Full=Nuclear transport factor 2B {ECO:0000303|PubMed:16428596}; Short=AtNTF2b {ECO:0000303|PubMed:16428596}; Short=NTF-2;	SubName: Full=Nuclear transport factor 2 {ECO:0000313|EMBL:OMO76715.1};	Nuclear transport factor 2	GO:0005737,cytoplasm; GO:0005635,nuclear envelope; GO:0005634,nucleus; GO:0006606,protein import into nucleus	Nuclear transport factor 2 (NTF2) domain
gene-LOC110687121	1.32	1.96	1.2	0.79	0.72	0.88	157	227	125	86	81	99	2.322	1.215	3.69622e-05	0.000702211	up	NW_018743919.1	463128	471549	+	LOC110687121	--	K20606 mitogen-activated protein kinase kinase kinase ANP1 [EC:2.7.11.25] | (RefSeq) receptor-like serine/threonine-protein kinase SD1-7 isoform X1 (A)	uncharacterized protein LOC110687121 [Chenopodium quinoa]	RecName: Full=G-type lectin S-receptor-like serine/threonine-protein kinase At1g11330; EC=2.7.11.1; Flags: Precursor;	SubName: Full=uncharacterized protein LOC107858220 {ECO:0000313|RefSeq:XP_016558400.1};	--	GO:0016021,integral component of membrane; GO:0005886,plasma membrane; GO:0005524,ATP binding; GO:0005516,calmodulin binding; GO:0030246,carbohydrate binding; GO:0004674,protein serine/threonine kinase activity; GO:0006468,protein phosphorylation; GO:0048544,recognition of pollen	Protein kinase domain
gene-LOC110687158	1.83	2.73	1.19	8.09	7.8	7.97	169	247	97	683	688	700	0.3	-1.738	1.88269e-08	9.03618e-07	down	NW_018743919.1	1329183	1335802	+	LOC110687158	--	K06883 uncharacterized protein | (RefSeq) LOW QUALITY PROTEIN: uncharacterized protein LOC104799061 (A)	uncharacterized protein LOC110687158 [Chenopodium quinoa]	RecName: Full=Cysteine-rich receptor-like protein kinase 10; Short=Cysteine-rich RLK10; EC=2.7.11.-; AltName: Full=Receptor-like protein kinase 4; Flags: Precursor;	SubName: Full=Uncharacterized protein {ECO:0000313|EMBL:KDP20811.1};	--	GO:0016021,integral component of membrane; GO:0005886,plasma membrane; GO:0005524,ATP binding; GO:0004674,protein serine/threonine kinase activity; GO:0042742,defense response to bacterium; GO:0006468,protein phosphorylation	Protein kinase domain
gene-LOC110687201	6.58	9.09	10.59	3.95	4.66	5.9	343	464	486	188	232	292	2.237	1.162	1.90144e-05	0.000401469	up	NW_018743919.1	18914	21470	+	LOC110687201	--	K08332 vacuolar protein 8 | (RefSeq) U-box domain-containing protein 4 (A)	uncharacterized protein LOC110687201 [Chenopodium quinoa]	RecName: Full=U-box domain-containing protein 4; EC=2.3.2.27; AltName: Full=Plant U-box protein 4; AltName: Full=RING-type E3 ubiquitin transferase PUB4 {ECO:0000305};	SubName: Full=Uncharacterized protein {ECO:0000313|EMBL:KNA09553.1};	FOG: Armadillo/beta-catenin-like repeats	GO:0005634,nucleus; GO:0004842,ubiquitin-protein transferase activity	Armadillo/beta-catenin-like repeat
gene-LOC110687210	0.54	2.72	0.62	0.32	0.21	0	11	54	11	6	4	0	8.911	3.156	0.00244649	0.0202263	up	NW_018743919.1	269320	272018	+	LOC110687210	--	K06910 phosphatidylethanolamine-binding protein | (RefSeq) protein MOTHER of FT and TFL1-like (A)	protein MOTHER of FT and TFL1-like [Chenopodium quinoa]	RecName: Full=Protein MOTHER of FT and TFL1;	SubName: Full=protein MOTHER of FT and TFL1-like {ECO:0000313|RefSeq:XP_010268882.1};	Phosphatidylethanolamine binding protein	GO:0005737,cytoplasm; GO:0005634,nucleus; GO:0009738,abscisic acid-activated signaling pathway; GO:0010030,positive regulation of seed germination; GO:0009737,response to abscisic acid	Phosphatidylethanolamine-binding protein
gene-LOC110687236	2.25	2.68	1.57	0.68	0.89	0.86	148	173	91	41	56	54	3.36	1.748	1.14506e-07	4.62057e-06	up	NW_018743919.1	663122	672193	+	LOC110687236	--	K20606 mitogen-activated protein kinase kinase kinase ANP1 [EC:2.7.11.25] | (RefSeq) receptor-like serine/threonine-protein kinase SD1-7 isoform X1 (A)	receptor-like serine/threonine-protein kinase SD1-8 [Chenopodium quinoa]	RecName: Full=Receptor-like serine/threonine-protein kinase SD1-8; EC=2.7.11.1; AltName: Full=Arabidopsis thaliana receptor kinase 3; AltName: Full=S-domain-1 (SD1) receptor kinase 8; Short=SD1-8; Flags: Precursor;	SubName: Full=Brassica self-incompatibility locus family protein {ECO:0000313|EMBL:EEE85477.1};	--	GO:0016021,integral component of membrane; GO:0005886,plasma membrane; GO:0009506,plasmodesma; GO:0005773,vacuole; GO:0005524,ATP binding; GO:0030246,carbohydrate binding; GO:0004674,protein serine/threonine kinase activity; GO:0004675,transmembrane receptor protein serine/threonine kinase activity; GO:0031625,ubiquitin protein ligase binding; GO:0006468,protein phosphorylation; GO:0048544,recogn…	Protein tyrosine kinase
gene-LOC110687237	1.55	1.02	1.31	5.03	3.36	3.93	180	116	134	532	371	432	0.4	-1.32	6.72704e-05	0.00115995	down	NW_018743919.1	678923	686532	+	LOC110687237	--	K20606 mitogen-activated protein kinase kinase kinase ANP1 [EC:2.7.11.25] | (RefSeq) receptor-like serine/threonine-protein kinase SD1-7 isoform X1 (A)	G-type lectin S-receptor-like serine/threonine-protein kinase At1g11410 [Chenopodium quinoa]	RecName: Full=G-type lectin S-receptor-like serine/threonine-protein kinase RKS1; EC=2.7.11.1; AltName: Full=Receptor-like protein kinase 1; Flags: Precursor;	SubName: Full=G-type lectin S-receptor-like serine/threonine-protein kinase At1g11410 isoform X1 {ECO:0000313|RefSeq:XP_018818444.1};	--	GO:0016021,integral component of membrane; GO:0005886,plasma membrane; GO:0005524,ATP binding; GO:0005516,calmodulin binding; GO:0030246,carbohydrate binding; GO:0004674,protein serine/threonine kinase activity; GO:0006468,protein phosphorylation; GO:0048544,recognition of pollen	Protein tyrosine kinase
gene-LOC110687239	9.69	6.13	10.67	3.46	4.77	4.81	460	285	446	150	216	217	2.592	1.374	2.74085e-05	0.000546482	up	NW_018743919.1	691320	693648	+	LOC110687239	--	K10260 F-box and WD-40 domain protein 7 | (RefSeq) WD40/YVTN repeat-like-containing domain (A)	U-box domain-containing protein 8-like [Chenopodium quinoa]	RecName: Full=U-box domain-containing protein 8; EC=2.3.2.27; AltName: Full=Plant U-box protein 8; AltName: Full=RING-type E3 ubiquitin transferase PUB8 {ECO:0000305};	RecName: Full=RING-type E3 ubiquitin transferase {ECO:0000256|SAAS:SAAS00702733}; EC=2.3.2.27 {ECO:0000256|SAAS:SAAS00702733};	FOG: Armadillo/beta-catenin-like repeats	GO:0005737,cytoplasm; GO:0005634,nucleus; GO:0004842,ubiquitin-protein transferase activity; GO:0016567,protein ubiquitination	U-box domain
gene-LOC110687247	16.89	11.32	19.77	1.7	1.42	2.24	349	229	360	32	28	44	11.283	3.496	3.89182e-20	9.99661e-18	up	NW_018743919.1	840179	842060	+	LOC110687247	--	--	23 kDa jasmonate-induced protein-like [Chenopodium quinoa]	RecName: Full=23 kDa jasmonate-induced protein;	SubName: Full=Uncharacterized protein {ECO:0000313|EMBL:KMS94989.1};	--	--	--
gene-LOC110687250	0.09	0.09	0.17	0.67	0.77	0.68	3	3	5	21	25	22	0.202	-2.309	0.00105819	0.0106491	down	NW_018743919.1	843743	846240	+	LOC110687250	--	--	--	--	--	--	--	--
gene-LOC110687261	0.86	0.69	0.57	2.71	3.34	1.9	48	38	28	139	179	101	0.343	-1.545	1.36776e-05	0.000303228	down	NW_018743919.1	1055718	1060313	+	LOC110687261	--	K06883 uncharacterized protein | (RefSeq) LOW QUALITY PROTEIN: uncharacterized protein LOC104799061 (A)	putative receptor-like protein kinase At4g00960 [Chenopodium quinoa]	RecName: Full=Cysteine-rich receptor-like protein kinase 25; Short=Cysteine-rich RLK25; EC=2.7.11.-; Flags: Precursor;	SubName: Full=Uncharacterized protein {ECO:0000313|EMBL:EMJ12568.1};	--	GO:0016021,integral component of membrane; GO:0005886,plasma membrane; GO:0005524,ATP binding; GO:0004674,protein serine/threonine kinase activity; GO:0042742,defense response to bacterium; GO:0006468,protein phosphorylation	Protein tyrosine kinase
gene-LOC110687265	1.95	0.94	1.71	6.06	3.67	5.94	70	33	54	199	126	203	0.371	-1.432	0.00123821	0.0120222	down	NW_018743919.1	1143853	1145990	-	LOC110687265	--	K01176 alpha-amylase [EC:3.2.1.1] | (RefSeq) alpha-amylase-like (A)	alpha-amylase-like [Chenopodium quinoa]	RecName: Full=Alpha-amylase; EC=3.2.1.1 {ECO:0000250|UniProtKB:P00693}; AltName: Full=1,4-alpha-D-glucan glucanohydrolase; Flags: Precursor;	RecName: Full=Alpha-amylase {ECO:0000256|PIRNR:PIRNR001028}; EC=3.2.1.1 {ECO:0000256|PIRNR:PIRNR001028}; AltName: Full=1,4-alpha-D-glucan glucanohydrolase {ECO:0000256|PIRNR:PIRNR001028};	Alpha-amylase	GO:0004556,alpha-amylase activity; GO:0103025,alpha-amylase activity (releasing maltohexaose); GO:0005509,calcium ion binding; GO:0005975,carbohydrate metabolic process	Alpha-amylase C-terminal beta-sheet domain
gene-LOC110687266	2.23	7.76	3.99	2.03	0.4	1.85	99	337	156	82	17	78	3.823	1.935	0.00200092	0.0173676	up	NW_018743919.1	1152959	1157595	-	LOC110687266	--	K14173 alpha-farnesene synthase [EC:4.2.3.46] | (RefSeq) alpha-farnesene synthase-like (A)	alpha-farnesene synthase-like [Chenopodium quinoa]	RecName: Full=Alpha-farnesene synthase; EC=4.2.3.46; AltName: Full=(E,E)-alpha-farnesene synthase; AltName: Full=Terpene synthase 7; Short=RcSeTPS7;	SubName: Full=Uncharacterized protein {ECO:0000313|EMBL:KMS96558.1};	--	GO:0000287,magnesium ion binding; GO:0010334,sesquiterpene synthase activity; GO:0051762,sesquiterpene biosynthetic process	Terpene synthase family, metal binding domain
gene-LOC110687269	26.92	41.67	46.84	100.22	245.88	55.45	469	711	719	1595	4090	918	0.372	-1.427	0.0014248	0.0134346	down	NW_018743919.1	1190457	1191779	-	LOC110687269	--	K11251 histone H2A | (RefSeq) probable histone H2A.3 (A)	probable histone H2A.3 [Chenopodium quinoa]	RecName: Full=Protein H2A.7; AltName: Full=wcH2A-10; AltName: Full=wcH2A-4;	RecName: Full=Histone H2A {ECO:0000256|RuleBase:RU003767};	Histone 2A	GO:0000786,nucleosome; GO:0005634,nucleus; GO:0003677,DNA binding; GO:0046982,protein heterodimerization activity	C-terminus of histone H2A
gene-LOC110687271	1427.06	1209.83	1293.65	737.25	648.11	982.16	26495	21996	21159	12502	11487	17325	2.08	1.056	0.000154461	0.00227927	up	NW_018743919.1	1218976	1220482	-	LOC110687271	--	K08901 photosystem II oxygen-evolving enhancer protein 3 | (RefSeq) oxygen-evolving enhancer protein 3, chloroplastic (A)	oxygen-evolving enhancer protein 3, chloroplastic [Chenopodium quinoa]	RecName: Full=Oxygen-evolving enhancer protein 3, chloroplastic; Short=OEE3; AltName: Full=16 kDa subunit of oxygen evolving system of photosystem II; AltName: Full=OEC 16 kDa subunit; Flags: Precursor;	SubName: Full=Uncharacterized protein {ECO:0000313|EMBL:KNA09121.1};	--	GO:0009535,chloroplast thylakoid membrane; GO:0019898,extrinsic component of membrane; GO:0009654,photosystem II oxygen evolving complex; GO:0005509,calcium ion binding; GO:0015979,photosynthesis	Oxygen evolving enhancer protein 3 (PsbQ)
gene-LOC110687273	1.09	2.66	2.06	7.02	18.5	4.43	64	152	106	375	1032	246	0.248	-2.013	3.42824e-05	0.000659189	down	NW_018743919.1	1257088	1263610	+	LOC110687273	--	K10405 kinesin family member C1 | (RefSeq) kinesin-like protein KIN-14C (A)	kinesin-like protein KIN-14C [Chenopodium quinoa]	RecName: Full=Kinesin-like protein KIN-14C {ECO:0000305}; AltName: Full=AtKIN14a {ECO:0000303|PubMed:18088313}; AltName: Full=Kinesin-like protein KatA {ECO:0000303|PubMed:8492804, ECO:0000303|PubMed:8597656};	RecName: Full=Kinesin-like protein {ECO:0000256|RuleBase:RU000394};	Kinesin (KAR3 subfamily)	GO:0000777,condensed chromosome kinetochore; GO:0005737,cytoplasm; GO:0005874,microtubule; GO:0005872,minus-end kinesin complex; GO:0005634,nucleus; GO:0009524,phragmoplast; GO:0005819,spindle; GO:0005524,ATP binding; GO:0008569,ATP-dependent microtubule motor activity, minus-end-directed; GO:0008017,microtubule binding; GO:0009971,anastral spindle assembly involved in male meiosis; GO:0051301,ce…	Kinesin motor domain
gene-LOC110687281	0.2	0.43	0.51	3.56	2.21	2.59	9	19	20	145	94	110	0.167	-2.582	6.55147e-09	3.37963e-07	down	NW_018743919.1	1392851	1395603	+	LOC110687281	--	K20606 mitogen-activated protein kinase kinase kinase ANP1 [EC:2.7.11.25] | (RefSeq) receptor-like serine/threonine-protein kinase SD1-7 isoform X1 (A)	putative receptor-like protein kinase At4g00960 [Chenopodium quinoa]	RecName: Full=Cysteine-rich receptor-like protein kinase 8; Short=Cysteine-rich RLK8; EC=2.7.11.-; Flags: Precursor;	SubName: Full=Uncharacterized protein {ECO:0000313|EMBL:ESW15165.1};	--	GO:0016021,integral component of membrane; GO:0005886,plasma membrane; GO:0005524,ATP binding; GO:0004674,protein serine/threonine kinase activity; GO:0042742,defense response to bacterium; GO:0006468,protein phosphorylation	Protein kinase domain
gene-LOC110687286	2.85	3.88	2.42	2.61	1.86	1.11	135	180	101	113	84	50	2.059	1.042	0.00580364	0.0388491	up	NW_018743919.1	1376228	1379292	+	LOC110687286	--	--	--	--	--	--	--	--
gene-LOC110687300	1.95	2.44	1.67	1.36	0.28	0.17	110	135	83	70	15	9	4.166	2.059	0.00339128	0.0260588	up	NW_018743919.1	1830377	1834642	-	LOC110687300	--	K06883 uncharacterized protein | (RefSeq) LOW QUALITY PROTEIN: uncharacterized protein LOC104799061 (A)	cysteine-rich receptor-like protein kinase 25 [Chenopodium quinoa]	RecName: Full=Cysteine-rich receptor-like protein kinase 25; Short=Cysteine-rich RLK25; EC=2.7.11.-; Flags: Precursor;	SubName: Full=Uncharacterized protein {ECO:0000313|EMBL:KDO37422.1};	--	GO:0016021,integral component of membrane; GO:0005886,plasma membrane; GO:0005524,ATP binding; GO:0004674,protein serine/threonine kinase activity; GO:0042742,defense response to bacterium; GO:0006468,protein phosphorylation	Protein tyrosine kinase
gene-LOC110687322	1.19	0.85	0.78	0.03	0.16	0.13	40	28	23	1	5	4	11.528	3.527	1.41742e-06	4.26084e-05	up	NW_018743919.1	2001457	2004376	+	LOC110687322	--	K02183 calmodulin | (RefSeq) calmodulin-like (A)	uncharacterized protein LOC110687322 [Chenopodium quinoa]	RecName: Full=Calmodulin; Short=CaM;	SubName: Full=Uncharacterized protein {ECO:0000313|EMBL:KNA15067.1};	Calmodulin and related proteins (EF-Hand superfamily)	GO:0005737,cytoplasm; GO:0005509,calcium ion binding; GO:0019904,protein domain specific binding	EF-hand domain pair
gene-LOC110687338	9.01	6.64	10.15	5.92	4.84	5.24	380	274	377	228	195	210	2.037	1.026	0.000445504	0.00535079	up	NW_018743919.1	2270665	2277227	-	LOC110687338	--	--	RNA pseudouridine synthase 6, chloroplastic-like isoform X1 [Chenopodium quinoa]	RecName: Full=RNA pseudouridine synthase 6, chloroplastic; EC=5.4.99.-; AltName: Full=RNA pseudouridylate synthase 6; AltName: Full=RNA-uridine isomerase 6; Flags: Precursor;	SubName: Full=Uncharacterized protein {ECO:0000313|EMBL:KNA04012.1};	RNA pseudouridylate synthases	GO:0009507,chloroplast; GO:0009982,pseudouridine synthase activity; GO:0003723,RNA binding; GO:0046087,cytidine metabolic process; GO:0019858,cytosine metabolic process; GO:0001522,pseudouridine synthesis; GO:0008655,pyrimidine-containing compound salvage; GO:0009451,RNA modification	RNA pseudouridylate synthase
gene-LOC110687339	0.99	1.14	1.27	0.52	0.61	0.82	56	63	63	27	33	44	2.162	1.113	0.00268596	0.0218139	up	NW_018743919.1	2286983	2292658	+	LOC110687339	--	K23541 Ca2+/H+ antiporter, TMEM165/GDT1 family | (RefSeq) pentatricopeptide repeat-containing protein At5g04780, mitochondrial-like (A)	pentatricopeptide repeat-containing protein At2g37320-like [Chenopodium quinoa]	RecName: Full=Pentatricopeptide repeat-containing protein At2g37320;	SubName: Full=Uncharacterized protein {ECO:0000313|EMBL:KNA25462.1};	FOG: PPR repeat	GO:0043231,intracellular membrane-bounded organelle; GO:0004519,endonuclease activity; GO:0003723,RNA binding; GO:0009451,RNA modification	PPR repeat family
gene-LOC110687340	1.26	1.21	1.92	0.95	1.01	0.55	55	52	74	38	42	23	2.217	1.149	0.0043746	0.031473	up	NW_018743919.1	2311552	2315275	+	LOC110687340	--	K01488 adenosine deaminase [EC:3.5.4.4] | (RefSeq) adenosine deaminase-like protein isoform X1 (A)	adenosine deaminase-like protein isoform X1 [Chenopodium quinoa]	--	SubName: Full=Uncharacterized protein {ECO:0000313|EMBL:KNA04014.1};	Adenine deaminase/adenosine deaminase	GO:0019239,deaminase activity	Adenosine/AMP deaminase
gene-LOC110687342	1.45	1.87	1.53	0.94	0.56	0.74	27	34	25	16	10	13	2.692	1.428	0.00461116	0.0327753	up	NW_018743919.1	2328047	2328958	+	LOC110687342	--	K08744 cardiolipin synthase (CMP-forming) [EC:2.7.8.41] | (RefSeq) cardiolipin synthase (CMP-forming), mitochondrial (A)	uncharacterized protein LOC110687342 [Chenopodium quinoa]	--	SubName: Full=uncharacterized protein LOC104214350 {ECO:0000313|RefSeq:XP_009762309.1};	--	--	--
gene-LOC110687343	3.14	3.35	2.78	1.33	1.47	1.38	170	178	133	66	76	71	2.798	1.484	4.47092e-09	2.38225e-07	up	NW_018743919.1	2330124	2335898	-	LOC110687343	--	K14638 solute carrier family 15 (peptide/histidine transporter), member 3/4 | (RefSeq) protein NRT1/ PTR FAMILY 1.2-like (A)	protein NRT1/ PTR FAMILY 1.2-like [Chenopodium quinoa]	RecName: Full=Protein NRT1/ PTR FAMILY 1.2; Short=AtNPF1.2; AltName: Full=Nitrate transporter 1.11;	SubName: Full=Uncharacterized protein {ECO:0000313|EMBL:KNA07630.1};	H+/oligopeptide symporter	GO:0016021,integral component of membrane; GO:0005886,plasma membrane; GO:0080054,low-affinity nitrate transmembrane transporter activity; GO:0015706,nitrate transport	POT family
gene-LOC110687351	0.28	0.97	0.85	3.31	10.78	2.13	25	83	66	265	903	178	0.166	-2.595	8.47191e-06	0.000201467	down	NW_018743919.1	2400088	2408725	+	LOC110687351	--	K16743 abnormal spindle-like microcephaly-associated protein | (RefSeq) abnormal spindle-like microcephaly-associated protein homolog (A)	abnormal spindle-like microcephaly-associated protein homolog [Chenopodium quinoa]	RecName: Full=Myosin-6; AltName: Full=AtMYA2;	SubName: Full=Uncharacterized protein {ECO:0000313|EMBL:KNA22012.1};	Microtubule-associated protein Asp	GO:0005737,cytoplasm; GO:0016459,myosin complex; GO:0003779,actin binding; GO:0005524,ATP binding; GO:0005516,calmodulin binding; GO:0003774,motor activity	IQ calmodulin-binding motif
gene-LOC110687357	7.9	9.64	6.74	1.76	1.03	0.66	113	135	85	23	14	9	8.875	3.15	2.11175e-13	2.41264e-11	up	NW_018743919.1	2463073	2463774	+	LOC110687357	--	--	uncharacterized protein LOC110687357 [Chenopodium quinoa]	--	SubName: Full=Uncharacterized protein {ECO:0000313|EMBL:KJB57727.1};	--	--	--
gene-LOC110687365	3.69	8.71	5.25	2.12	1.5	0.91	103	238	129	54	40	24	4.801	2.263	6.43888e-08	2.75334e-06	up	NW_018743919.1	2616187	2617555	+	LOC110687365	--	K20855 beta-1,3-galactosyltransferase 1/2/3/4/5/7/8 [EC:2.4.1.-] | (RefSeq) probable beta-1,3-galactosyltransferase 2 (A)	uncharacterized protein LOC110687365 [Chenopodium quinoa]	--	SubName: Full=Uncharacterized protein {ECO:0000313|EMBL:KNA24128.1};	--	--	Senescence regulator
gene-LOC110687371	477.51	467.62	419.08	267.99	192.52	294.59	15950	15296	12332	8176	6139	9349	2.251	1.17	1.70975e-05	0.000367454	up	NW_018743919.1	2731304	2732942	+	LOC110687371	--	K02115 F-type H+-transporting ATPase subunit gamma | (RefSeq) ATP synthase gamma chain, chloroplastic-like (A)	ATP synthase gamma chain, chloroplastic-like [Chenopodium quinoa]	RecName: Full=ATP synthase gamma chain, chloroplastic; AltName: Full=F-ATPase gamma subunit; Flags: Precursor;	SubName: Full=Uncharacterized protein {ECO:0000313|EMBL:KNA09180.1};	F0F1-type ATP synthase, gamma subunit	GO:0009535,chloroplast thylakoid membrane; GO:0045261,proton-transporting ATP synthase complex, catalytic core F(1); GO:0046933,proton-transporting ATP synthase activity, rotational mechanism; GO:0015986,ATP synthesis coupled proton transport	ATP synthase
gene-LOC110687373	0.08	0	0	5.49	1.88	5.32	2	0	0	120	43	121	0.009	-6.874	7.67952e-09	3.91814e-07	down	NW_018743919.1	2754078	2756160	-	LOC110687373	--	--	--	--	--	--	--	--
gene-LOC110687386	0.65	1.26	1.19	3.68	3.64	2.41	28	53	45	144	149	98	0.397	-1.332	7.46945e-05	0.0012611	down	NW_018743919.1	2906277	2912798	+	LOC110687386	--	K19619 tyrosyl-DNA phosphodiesterase 2 [EC:3.1.4.-] | (RefSeq) uncharacterized protein LOC110687386 (A)	uncharacterized protein LOC110687386 [Chenopodium quinoa]	--	SubName: Full=Uncharacterized protein {ECO:0000313|EMBL:KNA15127.1};	Predicted Mg2+-dependent phosphodiesterase TTRAP	GO:0046872,metal ion binding	Endonuclease/Exonuclease/phosphatase family
gene-LOC110687389	31.32	15.27	22.66	15.76	8.39	12.99	794	379	506	365	203	313	2.374	1.248	0.00271593	0.0219806	up	NW_018743919.1	2972927	2978228	-	LOC110687389	--	--	uncharacterized protein LOC110687389 [Chenopodium quinoa]	--	SubName: Full=Uncharacterized protein {ECO:0000313|EMBL:KNA03912.1};	--	--	--
gene-LOC110687390	3.97	4.25	4.9	3.05	3.16	1.89	104	109	113	73	79	47	2.05	1.036	0.000539739	0.00624303	up	NW_018743919.1	2994100	2998141	-	LOC110687390	--	K13347 peroxisomal membrane protein 2 | (RefSeq) peroxisomal membrane protein PMP22-like (A)	peroxisomal membrane protein PMP22-like [Chenopodium quinoa]	RecName: Full=Peroxisomal membrane protein PMP22; AltName: Full=22 kDa peroxisomal membrane protein;	SubName: Full=Uncharacterized protein {ECO:0000313|EMBL:KNA25253.1};	Peroxisomal membrane protein MPV17 and related proteins	GO:0005779,integral component of peroxisomal membrane	Mpv17 / PMP22 family
gene-LOC110687395	1.43	1.36	0.64	4.63	3.54	3	76	71	30	225	180	152	0.39	-1.358	0.000729641	0.00793676	down	NW_018743919.1	3045291	3049145	-	LOC110687395	--	K13424 WRKY transcription factor 33 | (RAP-DB) Os05g0474800, WRKY70, WRKY_GENE_70; WRKY transcription factor 70. (A)	probable WRKY transcription factor 31 [Chenopodium quinoa]	RecName: Full=WRKY transcription factor 42 {ECO:0000303|Ref.1}; AltName: Full=WRKY DNA-binding protein 42 {ECO:0000303|Ref.1};	SubName: Full=Uncharacterized protein {ECO:0000313|EMBL:KNA25077.1};	--	GO:0005634,nucleus; GO:0003700,DNA-binding transcription factor activity; GO:0043565,sequence-specific DNA binding; GO:0044212,transcription regulatory region DNA binding; GO:0045892,negative regulation of transcription, DNA-templated; GO:0006351,transcription, DNA-templated	WRKY DNA -binding domain
gene-LOC110687403	1.08	1.7	0.85	2.96	4.74	3.94	26	40	18	65	109	90	0.392	-1.352	0.000495141	0.00584888	down	NW_018743919.1	3225740	3229938	+	LOC110687403	--	K22736 vacuolar iron transporter family protein | (RefSeq) vacuolar iron transporter 1-like (A)	vacuolar iron transporter 1-like [Chenopodium quinoa]	RecName: Full=Vacuolar iron transporter 1; Short=AtVIT1;	SubName: Full=Uncharacterized protein {ECO:0000313|EMBL:KNA10933.1};	Uncharacterized membrane protein	GO:0016021,integral component of membrane; GO:0005774,vacuolar membrane; GO:0005384,manganese ion transmembrane transporter activity; GO:0030026,cellular manganese ion homeostasis; GO:0071281,cellular response to iron ion; GO:0006880,intracellular sequestering of iron ion; GO:0055072,iron ion homeostasis; GO:0071421,manganese ion transmembrane transport	VIT family
gene-LOC110687413	3.29	1.72	1.84	1.54	1.16	1.07	187	96	92	80	63	58	2.345	1.23	0.00383846	0.0284845	up	NW_018743919.1	3348187	3355951	-	LOC110687413	--	K14012 UBX domain-containing protein 1 | (RefSeq) ATPase family gene 2 protein (A)	katanin p60 ATPase-containing subunit A1-like [Chenopodium quinoa]	RecName: Full=Katanin p60 ATPase-containing subunit A1 {ECO:0000255|HAMAP-Rule:MF_03023}; Short=Katanin p60 subunit A1 {ECO:0000255|HAMAP-Rule:MF_03023}; EC=3.6.4.3 {ECO:0000255|HAMAP-Rule:MF_03023}; AltName: Full=CAD ATPase; AltName: Full=Katanin-1; Short=Atp60; AltName: Full=Protein BOTERO 1; AltName: Full=Protein ECTOPIC ROOT HAIR 3; AltName: Full=Protein FAT ROOT; AltName: Full=Protein FRAGIL…	SubName: Full=Uncharacterized protein {ECO:0000313|EMBL:KNA05072.1}; Flags: Fragment;	AAA+-type ATPase	GO:0008352,katanin complex; GO:0005874,microtubule; GO:0005634,nucleus; GO:0005524,ATP binding; GO:0008017,microtubule binding; GO:0008568,microtubule-severing ATPase activity; GO:0043622,cortical microtubule organization; GO:0000226,microtubule cytoskeleton organization; GO:0009825,multidimensional cell growth; GO:0009832,plant-type cell wall biogenesis; GO:0010091,trichome branching	ATPase family associated with various cellular activities (AAA)
gene-LOC110687415	146.28	67.84	73.03	52.79	44.47	49.62	4111	1867	1808	1355	1193	1325	2.534	1.341	0.000590564	0.00672366	up	NW_018743919.1	3401773	3405346	-	LOC110687415	--	--	plastid-lipid-associated protein, chloroplastic-like [Chenopodium quinoa]	RecName: Full=Plastid-lipid-associated protein, chloroplastic; AltName: Full=CitPAP; Flags: Precursor;	SubName: Full=Uncharacterized protein {ECO:0000313|EMBL:KNA03961.1};	--	GO:0009507,chloroplast	PAP_fibrillin
gene-LOC110687477	0.16	1.25	0.95	2.04	10.81	2.33	5	38	26	58	321	69	0.196	-2.35	0.00187643	0.0165573	down	NW_018743919.1	4165345	4168524	-	LOC110687477	--	--	uncharacterized protein LOC110687477 [Chenopodium quinoa]	--	SubName: Full=Uncharacterized protein {ECO:0000313|EMBL:KNA20608.1};	--	--	--
gene-LOC110687501	0	0	0	0.28	0.13	0.14	0	0	0	15	7	8	0.022	-5.48	0.000808828	0.0086194	down	NW_018743919.1	4435507	4438463	+	LOC110687501	--	--	--	--	--	--	--	--
gene-LOC110687503	0	0.04	0	0.28	0.34	0.18	0	2	0	12	15	8	0.069	-3.856	0.00583929	0.0390387	down	NW_018743919.1	4432411	4435364	+	LOC110687503	--	K10859 DNA oxidative demethylase [EC:1.14.11.33] | (RefSeq) DNA oxidative demethylase ALKBH2-like (A)	DNA oxidative demethylase ALKBH2-like [Chenopodium quinoa]	RecName: Full=DNA oxidative demethylase ALKBH2; EC=1.14.11.33; AltName: Full=Alkylated DNA repair protein alkB homolog 2; AltName: Full=Alpha-ketoglutarate-dependent dioxygenase alkB homolog 2;	SubName: Full=Uncharacterized protein {ECO:0000313|EMBL:KNA11626.1};	--	GO:0005634,nucleus; GO:0103053,1-ethyladenine demethylase activity; GO:0035514,DNA demethylase activity; GO:0046872,metal ion binding; GO:0006281,DNA repair	2OG-Fe(II) oxygenase superfamily
gene-LOC110687513	0.54	1.18	2.02	4.35	10.07	4.14	14	30	46	103	249	102	0.254	-1.977	0.000123138	0.00190539	down	NW_018743919.1	4816422	4819354	+	LOC110687513	--	K00943 dTMP kinase [EC:2.7.4.9] | (RefSeq) thymidylate kinase-like isoform X1 (A)	thymidylate kinase-like isoform X1 [Chenopodium quinoa]	RecName: Full=Thymidylate kinase {ECO:0000305}; Short=AtTMPK {ECO:0000303|PubMed:18036198}; EC=2.7.4.9 {ECO:0000305}; AltName: Full=Protein ZEUS1 {ECO:0000303|PubMed:18036198}; Flags: Precursor;	SubName: Full=Uncharacterized protein {ECO:0000313|EMBL:KNA20559.1};	Thymidylate kinase/adenylate kinase	GO:0005737,cytoplasm; GO:0005739,mitochondrion; GO:0005654,nucleoplasm; GO:0005524,ATP binding; GO:0004798,thymidylate kinase activity; GO:0006233,dTDP biosynthetic process; GO:0006235,dTTP biosynthetic process; GO:0009793,embryo development ending in seed dormancy	Thymidylate kinase
gene-LOC110687530	33.81	39.1	29.74	18.93	21.77	18.7	649	735	503	332	399	341	2.178	1.123	2.64485e-09	1.48355e-07	up	NW_018743919.1	3375201	3376142	-	LOC110687530	--	--	uncharacterized protein LOC110687530 [Chenopodium quinoa]	--	SubName: Full=Uncharacterized protein {ECO:0000313|EMBL:KNA25805.1};	--	--	--
gene-LOC110687580	0.07	0.35	0.08	1.26	2.63	1.14	2	10	2	34	74	32	0.123	-3.027	3.32245e-05	0.00064183	down	NW_018743920.1	664354	665800	-	LOC110687580	--	K14488 SAUR family protein | (RefSeq) indole-3-acetic acid-induced protein ARG7-like (A)	indole-3-acetic acid-induced protein ARG7-like [Chenopodium quinoa]	RecName: Full=Indole-3-acetic acid-induced protein ARG7;	SubName: Full=Uncharacterized protein {ECO:0000313|EMBL:KNA20704.1};	--	GO:0009733,response to auxin	Auxin responsive protein
gene-LOC110687641	0.86	0	0.62	0.03	0.03	0.03	30	0	19	1	1	1	21.55	4.43	0.00371962	0.0278187	up	NW_018743920.1	8540786	8543222	+	LOC110687641	--	--	--	--	--	--	--	--
gene-LOC110687684	1.69	1.94	1.53	0.72	0.53	0.83	64	72	51	25	19	30	3.086	1.626	4.31924e-05	0.000801945	up	NW_018743920.1	1614681	1616617	+	LOC110687684	--	K07418 cytochrome P450 family 2 subfamily J [EC:1.14.14.1 1.14.14.73 1.14.14.74 1.14.14.75] | (RefSeq) cytochrome P450 71A26-like (A)	cytochrome P450 71A25-like [Chenopodium quinoa]	RecName: Full=Cytochrome P450 71A25; EC=1.14.-.-;	SubName: Full=Uncharacterized protein {ECO:0000313|EMBL:OAY30793.1};	Cytochrome P450 CYP2 subfamily	GO:0005794,Golgi apparatus; GO:0016021,integral component of membrane; GO:0016020,membrane; GO:0020037,heme binding; GO:0005506,iron ion binding; GO:0016709,oxidoreductase activity, acting on paired donors, with incorporation or reduction of molecular oxygen, NAD(P)H as one donor, and incorporation of one atom of oxygen; GO:0044550,secondary metabolite biosynthetic process	Cytochrome P450
gene-LOC110687774	0.39	0.72	0.36	1.93	2.38	2.29	16	29	13	73	94	90	0.275	-1.86	2.34688e-06	6.67758e-05	down	NW_018743920.1	580502	584190	-	LOC110687774	--	--	ninja-family protein AFP2-like [Chenopodium quinoa]	RecName: Full=Ninja-family protein AFP3; AltName: Full=ABI five-binding protein 3; Short=ABI5-binding protein 3;	SubName: Full=Uncharacterized protein {ECO:0000313|EMBL:KNA02670.1};	--	GO:0005634,nucleus; GO:0007165,signal transduction	TPL-binding domain in jasmonate signalling
gene-LOC110687776	40.24	22.88	23.89	15.59	13.12	17.45	1153	642	603	408	359	475	2.412	1.27	0.000391566	0.00481475	up	NW_018743920.1	594288	598503	-	LOC110687776	--	K10949 ER lumen protein retaining receptor | (RefSeq) putative ER lumen protein-retaining receptor C28H8.4 (A)	putative ER lumen protein-retaining receptor C28H8.4 [Chenopodium quinoa]	RecName: Full=ER lumen protein-retaining receptor B;	SubName: Full=Uncharacterized protein {ECO:0000313|EMBL:KNA20699.1};	ER lumen protein retaining receptor	GO:0005789,endoplasmic reticulum membrane; GO:0005794,Golgi apparatus; GO:0000139,Golgi membrane; GO:0016021,integral component of membrane; GO:0046923,ER retention sequence binding; GO:0010204,defense response signaling pathway, resistance gene-independent; GO:0006621,protein retention in ER lumen; GO:0015031,protein transport; GO:0016192,vesicle-mediated transport	ER lumen protein retaining receptor
gene-LOC110687779	47.49	44.22	26.06	2.01	2.19	5.22	1293	1179	625	50	57	135	15.531	3.957	6.46608e-18	1.28786e-15	up	NW_018743920.1	600461	604600	-	LOC110687779	--	K10949 ER lumen protein retaining receptor | (RefSeq) putative ER lumen protein-retaining receptor C28H8.4 (A)	putative ER lumen protein-retaining receptor C28H8.4 [Chenopodium quinoa]	RecName: Full=ER lumen protein-retaining receptor B;	SubName: Full=Uncharacterized protein {ECO:0000313|EMBL:KMS97095.1};	ER lumen protein retaining receptor	GO:0005789,endoplasmic reticulum membrane; GO:0005794,Golgi apparatus; GO:0000139,Golgi membrane; GO:0016021,integral component of membrane; GO:0046923,ER retention sequence binding; GO:0010204,defense response signaling pathway, resistance gene-independent; GO:0006621,protein retention in ER lumen; GO:0015031,protein transport; GO:0016192,vesicle-mediated transport	ER lumen protein retaining receptor
gene-LOC110687784	1.05	1.02	0.99	0.08	0	0.08	41	39	34	3	0	3	23.273	4.541	6.52676e-09	3.37156e-07	up	NW_018743920.1	699954	702622	-	LOC110687784	--	--	uncharacterized protein LOC110687784 [Chenopodium quinoa]	--	SubName: Full=Uncharacterized protein {ECO:0000313|EMBL:KMS99394.1};	--	--	Plant mobile domain
gene-LOC110687785	19.5	22.84	18.59	4.1	4.39	2.04	693	795	582	133	149	69	7.362	2.88	1.36353e-23	5.70616e-21	up	NW_018743920.1	703582	705329	-	LOC110687785	--	K22794 flavonol-3-O-glucoside/galactoside glucosyltransferase [EC:2.4.1.239 2.4.1.-] | (RefSeq) anthocyanidin 3-O-glucoside 2''-O-glucosyltransferase-like (A)	LOW QUALITY PROTEIN: anthocyanidin 3-O-glucosyltransferase-like [Chenopodium quinoa]	RecName: Full=Anthocyanidin 3-O-glucosyltransferase; EC=2.4.1.115; AltName: Full=Anthocyanin rhamnosyl transferase; AltName: Full=Flavonol 3-O-glucosyltransferase; AltName: Full=UDP-glucose flavonoid 3-O-glucosyltransferase;	SubName: Full=Uncharacterized protein {ECO:0000313|EMBL:KMS97086.1};	UDP-glucuronosyl and UDP-glucosyl transferase	GO:0047213,anthocyanidin 3-O-glucosyltransferase activity; GO:0009718,anthocyanin-containing compound biosynthetic process	UDP-glucoronosyl and UDP-glucosyl transferase
gene-LOC110687786	22.08	30.87	19.29	16.87	13.43	13.62	1068	1462	822	745	620	626	2.045	1.032	2.10903e-05	0.00043808	up	NW_018743920.1	708699	711528	-	LOC110687786	--	K17961 trimethyltridecatetraene/dimethylnonatriene synthase [EC:1.14.14.58 1.14.14.59] | (RefSeq) cytochrome P450 82G1-like (A)	cytochrome P450 82G1-like [Chenopodium quinoa]	RecName: Full=Cytochrome P450 82G1; EC=1.14.-.-;	SubName: Full=Uncharacterized protein {ECO:0000313|EMBL:KNA20708.1};	Cytochrome P450 CYP2 subfamily	GO:0016021,integral component of membrane; GO:0016020,membrane; GO:0097008,(3E)-4,8-dimethyl-1,3,7-nonatriene synthase activity; GO:0097007,4,8,12-trimethyltrideca-1,3,7,11-tetraene synthase activity; GO:0020037,heme binding; GO:0005506,iron ion binding; GO:0006952,defense response; GO:0044550,secondary metabolite biosynthetic process; GO:0046246,terpene biosynthetic process; GO:0016114,terpenoid…	Cytochrome P450
gene-LOC110687787	12.9	13.3	14.17	9.1	7.84	8.14	312	315	302	201	181	187	2.02	1.014	3.46981e-06	9.39194e-05	up	NW_018743920.1	717067	722695	+	LOC110687787	--	K15161 cyclin-C | (RefSeq) cyclin-C1-1-like isoform X1 (A)	cyclin-C1-1-like isoform X1 [Chenopodium quinoa]	RecName: Full=Cyclin-C1-1; Short=CycC1;1;	SubName: Full=Uncharacterized protein {ECO:0000313|EMBL:KNA20709.1};	CDK8 kinase-activating protein cyclin C	GO:0000307,cyclin-dependent protein kinase holoenzyme complex; GO:0016592,mediator complex; GO:0005634,nucleus; GO:0016538,cyclin-dependent protein serine/threonine kinase regulator activity; GO:0007049,cell cycle; GO:0051301,cell division; GO:0045737,positive regulation of cyclin-dependent protein serine/threonine kinase activity; GO:1901409,positive regulation of phosphorylation of RNA polymera…	Cyclin, N-terminal domain
gene-LOC110687806	127.41	41.23	32.5	4.11	2.43	9.82	2581	818	580	76	47	189	15.785	3.98	1.866e-09	1.08086e-07	up	NW_018743920.1	907553	908650	-	LOC110687806	--	--	jasmonate-induced protein homolog [Chenopodium quinoa]	RecName: Full=Jasmonate-induced protein homolog;	SubName: Full=Uncharacterized protein {ECO:0000313|EMBL:KNA11535.1};	--	--	--
gene-LOC110687819	0.47	0.53	1.24	0.11	0.11	0.05	9	10	21	2	2	1	10.106	3.337	0.000914638	0.00946508	up	NW_018743920.1	1357081	1360566	+	LOC110687819	--	--	--	--	--	--	--	--
gene-LOC110687821	13.7	9.88	16.14	4.56	4.33	4.24	500	353	519	152	151	147	3.836	1.94	2.34943e-11	1.99327e-09	up	NW_018743920.1	1418808	1421670	-	LOC110687821	--	--	cytochrome b561 and DOMON domain-containing protein At4g12980-like [Chenopodium quinoa]	RecName: Full=Cytochrome b561 and DOMON domain-containing protein At4g12980; AltName: Full=Protein b561A.tha15; Flags: Precursor;	SubName: Full=Uncharacterized protein {ECO:0000313|EMBL:KMS95719.1};	Predicted membrane protein, contains DoH and Cytochrome b-561/ferric reductase transmembrane domains	GO:0016021,integral component of membrane; GO:0046872,metal ion binding; GO:0055114,oxidation-reduction process	Protein of unknown function (DUF568)
gene-LOC110687833	8.89	6.45	11.8	0.24	0.07	0.35	562	399	657	14	4	21	50.969	5.672	1.85577e-28	1.15197e-25	up	NW_018743920.1	1545967	1550175	+	LOC110687833	--	--	--	--	--	--	--	--
gene-LOC110687834	31.48	18.44	28.29	5.62	4.59	5.19	1257	721	995	205	175	197	6.474	2.695	8.3293e-17	1.49867e-14	up	NW_018743920.1	1551695	1553765	+	LOC110687834	--	K07418 cytochrome P450 family 2 subfamily J [EC:1.14.14.1 1.14.14.73 1.14.14.74 1.14.14.75] | (RefSeq) cytochrome P450 71A26-like (A)	cytochrome P450 71A3-like [Chenopodium quinoa]	RecName: Full=Cytochrome P450 71A4; EC=1.14.-.-; AltName: Full=CYPLXXIA4; AltName: Full=Cytochrome P-450EG2;	SubName: Full=Uncharacterized protein {ECO:0000313|EMBL:CAN67678.1};	Cytochrome P450 CYP2 subfamily	GO:0016021,integral component of membrane; GO:0020037,heme binding; GO:0005506,iron ion binding; GO:0004497,monooxygenase activity; GO:0016705,oxidoreductase activity, acting on paired donors, with incorporation or reduction of molecular oxygen	Cytochrome P450
gene-LOC110687835	0.39	0.92	0.57	0.02	0	0.04	23	54	30	1	0	2	42.706	5.416	8.09252e-08	3.39064e-06	up	NW_018743920.1	1555361	1558492	+	LOC110687835	--	K07418 cytochrome P450 family 2 subfamily J [EC:1.14.14.1] | (RefSeq) cytochrome P450 71A8-like (A)	cytochrome P450 71A21-like [Chenopodium quinoa]	RecName: Full=Cytochrome P450 71A21; EC=1.14.-.-;	SubName: Full=Uncharacterized protein {ECO:0000313|EMBL:OAY30793.1};	Cytochrome P450 CYP2 subfamily	GO:0016021,integral component of membrane; GO:0016020,membrane; GO:0020037,heme binding; GO:0005506,iron ion binding; GO:0016709,oxidoreductase activity, acting on paired donors, with incorporation or reduction of molecular oxygen, NAD(P)H as one donor, and incorporation of one atom of oxygen; GO:0044550,secondary metabolite biosynthetic process	Cytochrome P450
gene-LOC110687839	1.31	1.15	0.88	0.59	0.15	0.35	63	54	37	26	7	16	3.801	1.926	0.000991559	0.0100986	up	NW_018743920.1	1607484	1615032	+	LOC110687839	--	--	uncharacterized protein LOC110687839 isoform X1 [Chenopodium quinoa]	--	SubName: Full=uncharacterized protein LOC104595867 isoform X1 {ECO:0000313|RefSeq:XP_010255111.1};	--	--	SAM domain (Sterile alpha motif)
gene-LOC110687841	13.75	3.91	6.75	0.13	0.03	0.06	481	134	208	4	1	2	149.761	7.227	2.91258e-20	7.69356e-18	up	NW_018743920.1	1681755	1683895	+	LOC110687841	--	K07418 cytochrome P450 family 2 subfamily J [EC:1.14.14.1 1.14.14.73 1.14.14.74 1.14.14.75] | (RefSeq) cytochrome P450 71A26-like (A)	cytochrome P450 71A26-like [Chenopodium quinoa]	RecName: Full=Cytochrome P450 71A6; EC=1.14.-.-; Flags: Fragment;	SubName: Full=Uncharacterized protein {ECO:0000313|EMBL:OAY30793.1};	Cytochrome P450 CYP2 subfamily	GO:0016021,integral component of membrane; GO:0020037,heme binding; GO:0005506,iron ion binding; GO:0004497,monooxygenase activity; GO:0016705,oxidoreductase activity, acting on paired donors, with incorporation or reduction of molecular oxygen	Cytochrome P450
gene-LOC110687843	2.47	1.69	2.03	1.15	0.33	1.03	94	63	68	40	12	37	3.08	1.623	0.0032658	0.0253676	up	NW_018743920.1	1713826	1716512	+	LOC110687843	--	K07418 cytochrome P450 family 2 subfamily J [EC:1.14.14.1 1.14.14.73 1.14.14.74 1.14.14.75] | (RefSeq) cytochrome P450 71A26-like (A)	cytochrome P450 71A25-like [Chenopodium quinoa]	RecName: Full=Cytochrome P450 71A25; EC=1.14.-.-;	SubName: Full=Uncharacterized protein {ECO:0000313|EMBL:CAN67678.1};	Cytochrome P450 CYP2 subfamily	GO:0005794,Golgi apparatus; GO:0016021,integral component of membrane; GO:0016020,membrane; GO:0020037,heme binding; GO:0005506,iron ion binding; GO:0016709,oxidoreductase activity, acting on paired donors, with incorporation or reduction of molecular oxygen, NAD(P)H as one donor, and incorporation of one atom of oxygen; GO:0044550,secondary metabolite biosynthetic process	Cytochrome P450
gene-LOC110687844	1.91	2.13	1.26	1.13	0.77	1.08	117	128	68	63	45	63	2.224	1.153	0.00210232	0.0180458	up	NW_018743920.1	1719943	1723634	+	LOC110687844	--	--	--	--	--	--	--	--
gene-LOC110687845	3.56	3.22	4.34	1.84	1.55	1.2	53	47	57	25	22	17	3.066	1.616	7.52676e-05	0.00126905	up	NW_018743920.1	1719522	1721700	-	LOC110687845	--	--	--	--	--	--	--	--
gene-LOC110687874	0.4	1.01	0.76	1.53	3.21	1.36	40	99	67	140	306	129	0.448	-1.16	0.00484161	0.034043	down	NW_018743920.1	2331748	2339497	+	LOC110687874	--	K10755 replication factor C subunit 2/4 | (RefSeq) replication factor C subunit 4 (A)	protein STICHEL-like 2 isoform X1 [Chenopodium quinoa]	RecName: Full=Protein STICHEL-like 2;	SubName: Full=Uncharacterized protein {ECO:0000313|EMBL:KNA05939.1};	Replication factor C, subunit RFC4	GO:0009360,DNA polymerase III complex; GO:0005663,DNA replication factor C complex; GO:0005634,nucleus; GO:0005524,ATP binding; GO:0003677,DNA binding; GO:0003887,DNA-directed DNA polymerase activity; GO:0006281,DNA repair; GO:0006261,DNA-dependent DNA replication	DNA polymerase III, delta subunit
gene-LOC110687889	0.19	1.01	0.48	0	0	0	10	52	22	0	0	0	179.897	7.491	2.1139e-07	7.98502e-06	up	NW_018743920.1	2545051	2549657	+	LOC110687889	--	--	putative B3 domain-containing protein Os03g0621600 [Chenopodium quinoa]	RecName: Full=B3 domain-containing protein Os01g0905400;	SubName: Full=Uncharacterized protein {ECO:0000313|EMBL:KNA11404.1};	--	GO:0005634,nucleus; GO:0003677,DNA binding; GO:0006355,regulation of transcription, DNA-templated; GO:0006351,transcription, DNA-templated	B3 DNA binding domain
gene-LOC110687896	0.06	0.18	0.13	1.67	3.08	0.62	1	3	2	26	50	10	0.088	-3.498	0.000215286	0.00298444	down	NW_018743920.1	2627736	2630939	+	LOC110687896	--	--	30S ribosomal protein S21, chloroplastic-like [Chenopodium quinoa]	RecName: Full=30S ribosomal protein S21, chloroplastic {ECO:0000303|PubMed:10874039}; AltName: Full=Chloroplastic small ribosomal subunit protein bS21c {ECO:0000303|PubMed:28007896}; Flags: Precursor;	SubName: Full=Uncharacterized protein {ECO:0000313|EMBL:KNA11413.1};	--	GO:0009507,chloroplast; GO:0005840,ribosome; GO:0019843,rRNA binding; GO:0003735,structural constituent of ribosome; GO:0006412,translation	Ribosomal protein S21
gene-LOC110687900	0.24	0.39	0.58	1.4	3.08	1.25	20	31	42	105	241	97	0.269	-1.895	3.00456e-05	0.000591151	down	NW_018743920.1	2646125	2655773	+	LOC110687900	--	K15503 serine/threonine-protein phosphatase 6 regulatory ankyrin repeat subunit B | (RefSeq) uncharacterized LOC104891722 (A)	ankyrin-1-like [Chenopodium quinoa]	RecName: Full=Ankyrin repeat-containing protein NPR4 {ECO:0000305}; Short=OsNPR4 {ECO:0000303|PubMed:17309686};	SubName: Full=Uncharacterized protein {ECO:0000313|EMBL:KMS95414.1};	FOG: Ankyrin repeat	GO:0016021,integral component of membrane; GO:0005886,plasma membrane	Ankyrin repeats (3 copies)
gene-LOC110687917	0.29	1.29	0.69	2.93	5.54	3.1	12	52	25	110	217	121	0.243	-2.043	2.5161e-05	0.0005082	down	NW_018743920.1	2794771	2798084	-	LOC110687917	--	K10727 chromatin licensing and DNA replication factor 1 | (RefSeq) CDT1-like protein a, chloroplastic (A)	CDT1-like protein a, chloroplastic [Chenopodium quinoa]	RecName: Full=CDT1-like protein a, chloroplastic; Short=AtCDT1a; Flags: Precursor;	SubName: Full=Uncharacterized protein {ECO:0000313|EMBL:KNA10682.1};	DNA replication factor	GO:0009507,chloroplast; GO:0005634,nucleus; GO:0004693,cyclin-dependent protein serine/threonine kinase activity; GO:0070182,DNA polymerase binding; GO:0019901,protein kinase binding; GO:0007049,cell cycle; GO:0009658,chloroplast organization; GO:0051276,chromosome organization; GO:0006260,DNA replication; GO:0000076,DNA replication checkpoint; GO:0048229,gametophyte development	DNA replication factor Cdt1 C-terminal domain
gene-LOC110687926	18.73	16.87	19.31	7.43	6.59	12.68	381	336	346	138	128	245	2.555	1.353	0.000125253	0.0019325	up	NW_018743920.1	2977714	2978945	+	LOC110687926	--	--	uncharacterized protein LOC110687926 [Chenopodium quinoa]	--	SubName: Full=Uncharacterized protein {ECO:0000313|EMBL:KNA10679.1};	--	--	--
gene-LOC110687932	17.63	17.79	10.41	6.7	3.51	2.76	1009	997	525	350	192	150	4.46	2.157	9.20765e-08	3.79357e-06	up	NW_018743920.1	3022872	3033092	+	LOC110687932	--	K15813 beta-amyrin synthase [EC:5.4.99.39] | (RefSeq) beta-amyrin synthase-like (A)	beta-amyrin synthase-like [Chenopodium quinoa]	RecName: Full=Beta-amyrin synthase; EC=5.4.99.39;	RecName: Full=Terpene cyclase/mutase family member {ECO:0000256|RuleBase:RU362003}; EC=5.4.99.- {ECO:0000256|RuleBase:RU362003};	Oxidosqualene-lanosterol cyclase and related proteins	GO:0042300,beta-amyrin synthase activity; GO:0019745,pentacyclic triterpenoid biosynthetic process	Squalene-hopene cyclase C-terminal domain
gene-LOC110687935	0.19	0.46	0.22	1.6	2.34	2.15	3	7	3	23	35	32	0.177	-2.498	0.000154402	0.00227927	down	NW_018743920.1	3041442	3042485	-	LOC110687935	--	--	uncharacterized protein LOC110687935 [Chenopodium quinoa]	--	--	--	--	--
gene-LOC110687948	0.28	0.23	0.16	0.79	1.69	0.64	10	8	5	26	58	22	0.278	-1.849	0.00337904	0.0260079	down	NW_018743920.1	3260388	3265001	-	LOC110687948	--	--	--	--	--	--	--	--
gene-LOC110687951	0.08	0.21	0.02	0.45	1.01	0.69	6	15	1	30	71	48	0.179	-2.482	0.000728088	0.0079245	down	NW_018743920.1	3291714	3298579	-	LOC110687951	--	K17943 pumilio RNA-binding family | (RefSeq) pumilio homolog 5-like (A)	pumilio homolog 5-like [Chenopodium quinoa]	RecName: Full=Pumilio homolog 5; Short=APUM-5; Short=AtPUM5;	SubName: Full=Uncharacterized protein {ECO:0000313|EMBL:KMS98328.1};	Translational repressor Pumilio/PUF3 and related RNA-binding proteins (Puf superfamily)	GO:0005829,cytosol; GO:0005773,vacuole; GO:0003729,mRNA binding; GO:0003727,single-stranded RNA binding; GO:0061158,3'-UTR-mediated mRNA destabilization; GO:0051607,defense response to virus; GO:0009819,drought recovery; GO:0006970,response to osmotic stress; GO:0009651,response to salt stress	Pumilio-family RNA binding repeat
gene-LOC110687957	15.56	14.03	16.97	8.49	8.87	11.1	307	271	295	153	167	208	2.054	1.039	9.06459e-05	0.00148075	up	NW_018743920.1	3322415	3323382	-	LOC110687957	--	--	uncharacterized protein LOC110687957 [Chenopodium quinoa]	--	SubName: Full=Uncharacterized protein {ECO:0000313|EMBL:KMS98333.1};	--	GO:0009536,plastid	Putative quorum-sensing-regulated virulence factor
gene-LOC110687982	1.77	2.31	5.27	0	0	0	87	111	228	0	0	0	969.887	9.922	1.36646e-14	1.878e-12	up	NW_018743920.1	3618623	3621212	+	LOC110687982	--	--	--	--	--	--	--	--
gene-LOC110688016	1.73	8.41	2.95	15.76	29.88	16.15	20	95	30	166	329	177	0.26	-1.943	0.000163962	0.00238744	down	NW_018743920.1	4021451	4022545	-	LOC110688016	--	K03860 phosphatidylinositol glycan, class Q | (RefSeq) N-acetylglucosaminyl-phosphatidylinositol biosynthetic protein gpi1-like (A)	peamaclein-like [Chenopodium quinoa]	RecName: Full=Peamaclein; AltName: Allergen=Pru p 7;	SubName: Full=Uncharacterized protein {ECO:0000313|EMBL:KNA25942.1};	--	--	Gibberellin regulated protein
gene-LOC110688017	13.49	52.61	34.66	113.67	213.65	112.6	209	798	473	1608	3159	1657	0.282	-1.825	1.09968e-05	0.000251531	down	NW_018743920.1	4028109	4029398	-	LOC110688017	--	--	peamaclein-like [Chenopodium quinoa]	RecName: Full=Gibberellin-regulated protein 8; AltName: Full=GAST1 protein homolog 8; Flags: Precursor;	SubName: Full=Uncharacterized protein {ECO:0000313|EMBL:KNA25943.1};	--	GO:0005576,extracellular region; GO:0009740,gibberellic acid mediated signaling pathway	Gibberellin regulated protein
gene-LOC110688029	3.22	2.87	1.45	12.93	13.35	9.03	86	75	34	315	340	229	0.274	-1.866	4.61887e-07	1.60926e-05	down	NW_018743920.1	4183677	4186327	+	LOC110688029	--	--	uncharacterized protein LOC110688029 [Chenopodium quinoa]	RecName: Full=Protein MARD1 {ECO:0000303|PubMed:15159630}; AltName: Full=Mediator of ABA-regulated dormancy1 {ECO:0000303|PubMed:15159630}; AltName: Full=Senescence-associated protein SAG102 {ECO:0000303|PubMed:11402199};	SubName: Full=Uncharacterized protein {ECO:0000313|EMBL:KNA21404.1};	--	GO:0010494,cytoplasmic stress granule; GO:0000932,P-body; GO:0046872,metal ion binding; GO:0009737,response to abscisic acid; GO:0010162,seed dormancy process	zinc-finger of the FCS-type, C2-C2
gene-LOC110688036	53.45	30.72	51.39	12.41	16.28	12.3	915	515	775	194	266	200	4.271	2.095	3.92728e-11	3.20771e-09	up	NW_018743920.1	4265217	4266056	-	LOC110688036	--	K13448 calcium-binding protein CML | (RefSeq) probable calcium-binding protein CML44 (A)	uncharacterized protein LOC110688036 [Chenopodium quinoa]	--	SubName: Full=Uncharacterized protein {ECO:0000313|EMBL:KNA22656.1};	--	GO:0005509,calcium ion binding	EF-hand domain pair
gene-LOC110688047	12.31	17.47	13.88	37.88	43.12	38.6	285	396	283	801	953	849	0.456	-1.133	6.65344e-12	6.17974e-10	down	NW_018743920.1	4418262	4420732	+	LOC110688047	--	--	dormancy-associated protein homolog 4-like isoform X1 [Chenopodium quinoa]	RecName: Full=Dormancy-associated protein homolog 4 {ECO:0000305}; AltName: Full=DRM1 homolog 4 {ECO:0000305};	SubName: Full=dormancy-associated protein homolog 4 {ECO:0000313|RefSeq:XP_010261733.1};	--	--	Dormancy/auxin associated protein
gene-LOC110688064	0	0	0	3.52	3.78	3.66	0	0	0	49	55	53	0.004	-7.842	6.65505e-10	4.20114e-08	down	NW_018743920.1	4668747	4672058	+	LOC110688064	--	--	--	--	--	--	--	--
gene-LOC110688071	37.16	63.54	2.55	0.02	0.04	0.43	2017	3377	122	1	2	22	250.207	7.967	2.87105e-07	1.05456e-05	up	NW_018743920.1	4802875	4808051	-	LOC110688071	--	K15333 tRNA guanosine-2'-O-methyltransferase [EC:2.1.1.34] | (RefSeq) uncharacterized protein LOC104224633 (A)	subtilisin-like protease SBT1.4 [Chenopodium quinoa]	RecName: Full=Subtilisin-like protease SBT1.4 {ECO:0000303|PubMed:16193095}; EC=3.4.21.- {ECO:0000255|PROSITE-ProRule:PRU10082}; AltName: Full=Subtilase subfamily 1 member 4 {ECO:0000303|PubMed:16193095}; Short=AtSBT1.4 {ECO:0000303|PubMed:16193095}; Flags: Precursor;	SubName: Full=Uncharacterized protein {ECO:0000313|EMBL:KNA20367.1};	--	GO:0048046,apoplast; GO:0009505,plant-type cell wall; GO:0005774,vacuolar membrane; GO:0005773,vacuole; GO:0004252,serine-type endopeptidase activity; GO:0010150,leaf senescence; GO:0010223,secondary shoot formation	Subtilase family
gene-LOC110688074	2.64	3.19	4.04	0.11	0.38	0.34	154	182	207	6	21	19	14.84	3.891	7.30467e-21	2.26719e-18	up	NW_018743920.1	4843327	4846183	-	LOC110688074	--	K13754 solute carrier family 24 (sodium/potassium/calcium exchanger), member 6 | (RefSeq) cation/calcium exchanger 4-like (A)	cation/calcium exchanger 4-like [Chenopodium quinoa]	RecName: Full=Cation/calcium exchanger 4; Short=AtCCX4; AltName: Full=Protein CATION CALCIUM EXCHANGER 4; AltName: Full=Protein CATION EXCHANGER 10;	SubName: Full=Uncharacterized protein {ECO:0000313|EMBL:KNA20363.1};	K+-dependent Na+:Ca2+ antiporter	GO:0016021,integral component of membrane; GO:0015297,antiporter activity; GO:0006812,cation transport; GO:0006813,potassium ion transport; GO:0006814,sodium ion transport	Sodium/calcium exchanger protein
gene-LOC110688092	0	0	0.1	1.22	7.53	0.78	0	0	4	48	311	32	0.014	-6.131	0.000535062	0.00620435	down	NW_018743920.1	5182935	5187574	-	LOC110688092	--	K09285 AP2-like factor, ANT lineage | (RefSeq) LOW QUALITY PROTEIN: AP2-like ethylene-responsive transcription factor AIL1 (A)	LOW QUALITY PROTEIN: AP2-like ethylene-responsive transcription factor AIL1 [Chenopodium quinoa]	RecName: Full=AP2-like ethylene-responsive transcription factor AIL1; AltName: Full=Protein AINTEGUMENTA-LIKE 1;	SubName: Full=Uncharacterized protein {ECO:0000313|EMBL:KNA18841.1};	--	GO:0005634,nucleus; GO:0003677,DNA binding; GO:0003700,DNA-binding transcription factor activity; GO:0009873,ethylene-activated signaling pathway; GO:0007275,multicellular organism development; GO:0006351,transcription, DNA-templated	AP2 domain
gene-LOC110688093	2.61	3.62	3.28	0	0	0	142	193	157	0	0	0	1097.92	10.101	7.98762e-17	1.45121e-14	up	NW_018743920.1	5220137	5227593	+	LOC110688093	--	K00423 L-ascorbate oxidase [EC:1.10.3.3] | (RefSeq) L-ascorbate oxidase (A)	F-box/FBD/LRR-repeat protein At5g53840-like [Chenopodium quinoa]	RecName: Full=Putative F-box/LRR-repeat protein At5g54820;	SubName: Full=Uncharacterized protein {ECO:0000313|EMBL:KMS95077.1};	--	--	F-box domain
gene-LOC110688094	2.11	2.71	3.25	0	0	0	92	116	125	0	0	0	748.093	9.547	8.14561e-15	1.15355e-12	up	NW_018743920.1	5243468	5247691	+	LOC110688094	--	--	uncharacterized protein LOC110688094 [Chenopodium quinoa]	--	--	--	--	--
gene-LOC110688095	0.22	0.26	0.43	0	0	0	17	20	30	0	0	0	151.599	7.244	1.36123e-07	5.37637e-06	up	NW_018743920.1	5274873	5278715	-	LOC110688095	--	--	--	--	--	--	--	--
gene-LOC110688096	5.52	6.14	6.04	0	0	0	215	234	207	0	0	0	1473.28	10.525	2.79227e-18	5.8426e-16	up	NW_018743920.1	5269106	5274644	+	LOC110688096	--	K00423 L-ascorbate oxidase [EC:1.10.3.3] | (RefSeq) L-ascorbate oxidase (A)	putative F-box/LRR-repeat protein At5g54820 [Chenopodium quinoa]	RecName: Full=Putative F-box/LRR-repeat protein At5g54820;	SubName: Full=Uncharacterized protein {ECO:0000313|EMBL:KMS95075.1};	--	--	F-box domain
gene-LOC110688104	0.26	0.19	0.17	0.82	2	1.5	7	5	4	20	51	38	0.186	-2.428	0.000193205	0.00273419	down	NW_018743920.1	5351436	5354319	-	LOC110688104	--	K13566 omega-amidase [EC:3.5.1.3] | (RefSeq) omega-amidase, chloroplastic-like isoform X1 (A)	omega-amidase, chloroplastic-like isoform X1 [Chenopodium quinoa]	RecName: Full=Omega-amidase, chloroplastic; EC=3.5.1.3 {ECO:0000269|PubMed:24461228}; AltName: Full=Nitrilase-like protein 3; Flags: Precursor;	SubName: Full=Uncharacterized protein {ECO:0000313|EMBL:KNA15309.1};	Carbon-nitrogen hydrolase	GO:0009507,chloroplast; GO:0009570,chloroplast stroma; GO:0005829,cytosol; GO:0050152,omega-amidase activity; GO:0008270,zinc ion binding; GO:0006108,malate metabolic process; GO:0006807,nitrogen compound metabolic process; GO:0006107,oxaloacetate metabolic process	Carbon-nitrogen hydrolase
gene-LOC110688111	1.48	2.83	1.73	4	8.26	4.06	65	122	67	161	347	170	0.467	-1.098	0.00210007	0.0180349	down	NW_018743920.1	5435841	5441259	-	LOC110688111	--	K06630 14-3-3 protein epsilon | (RefSeq) uncharacterized protein LOC110789589 (A)	protein Brevis radix-like 2 [Chenopodium quinoa]	RecName: Full=Protein Brevis radix-like 2; Short=AtBRXL2;	SubName: Full=Uncharacterized protein {ECO:0000313|EMBL:KNA18830.1};	--	GO:0005634,nucleus	Transcription factor regulating root and shoot growth via Pin3
gene-LOC110688131	3.37	1.64	1.66	7.34	6.09	6.53	113	54	49	225	195	208	0.432	-1.211	0.00372554	0.0278574	down	NW_018743920.1	5726989	5731134	+	LOC110688131	--	K15084 solute carrier family 25 (mitochondrial carrier protein), member 16 | (RefSeq) mitochondrial carrier isoform 1 (A)	mitochondrial carrier protein CoAc1-like isoform X1 [Chenopodium quinoa]	RecName: Full=Mitochondrial carrier protein CoAc1 {ECO:0000305}; AltName: Full=Mitochondrial carrier family protein 2 {ECO:0000305}; AltName: Full=Mitochondrial coenzyme A transporter CoAc1 {ECO:0000305}; AltName: Full=ZmCoAc1 {ECO:0000303|PubMed:23590975};	SubName: Full=Uncharacterized protein {ECO:0000313|EMBL:KNA14578.1};	Mitochondrial solute carrier protein	GO:0016021,integral component of membrane; GO:0005743,mitochondrial inner membrane; GO:0015228,coenzyme A transmembrane transporter activity; GO:1990559,mitochondrial coenzyme A transmembrane transport	Mitochondrial carrier protein
gene-LOC110688133	0.46	0.86	0.5	2.15	3.71	1.46	17	31	16	72	130	51	0.316	-1.662	0.000305928	0.00395785	down	NW_018743920.1	5739204	5742426	+	LOC110688133	--	--	protein IQ-DOMAIN 1-like [Chenopodium quinoa]	RecName: Full=Protein IQ-DOMAIN 1 {ECO:0000303|PubMed:15960618};	SubName: Full=Uncharacterized protein {ECO:0000313|EMBL:KNA14572.1};	--	GO:0005737,cytoplasm; GO:0005874,microtubule; GO:0005634,nucleus; GO:0005516,calmodulin binding; GO:0008017,microtubule binding	IQ calmodulin-binding motif
gene-LOC110688134	2.81	2.05	1.95	1.24	1.53	1.27	77	55	47	31	40	33	2.162	1.113	0.00415488	0.0302333	up	NW_018743920.1	5735707	5738616	+	LOC110688134	--	--	uncharacterized protein LOC110688134 [Chenopodium quinoa]	--	SubName: Full=Uncharacterized protein {ECO:0000313|EMBL:KNA14575.1};	--	--	--
gene-LOC110688136	0.24	0.22	0.29	1.23	0.45	1.98	11	10	12	52	20	87	0.25	-2.002	0.00318251	0.0248601	down	NW_018743920.1	5750000	5755101	-	LOC110688136	--	K00521 ferric-chelate reductase [EC:1.16.1.7] | (RefSeq) ferric reduction oxidase 7, chloroplastic-like (A)	NAC domain-containing protein 90-like [Chenopodium quinoa]	RecName: Full=NAC domain-containing protein 90; Short=ANAC090;	SubName: Full=Uncharacterized protein {ECO:0000313|EMBL:OAY38223.1};	--	GO:0005634,nucleus; GO:0003677,DNA binding; GO:0003700,DNA-binding transcription factor activity; GO:0006351,transcription, DNA-templated	No apical meristem (NAM) protein
gene-LOC110688142	791.57	648.91	557.11	311.87	287.71	496.33	13664	10969	8472	4917	4741	8140	2.285	1.192	0.000357037	0.00446535	up	NW_018743920.1	5801780	5804060	+	LOC110688142	--	K14332 photosystem I subunit PsaO | (RefSeq) photosystem I subunit O-like (A)	photosystem I subunit O-like [Chenopodium quinoa]	RecName: Full=Photosystem I subunit O; Short=PSI-O; Flags: Precursor;	SubName: Full=Uncharacterized protein {ECO:0000313|EMBL:KNA13155.1};	--	GO:0009507,chloroplast; GO:0009535,chloroplast thylakoid membrane; GO:0016021,integral component of membrane; GO:0009522,photosystem I; GO:0009579,thylakoid; GO:0009768,photosynthesis, light harvesting in photosystem I; GO:0009767,photosynthetic electron transport chain	--
gene-LOC110688143	0.27	1.08	0.68	1.3	2.94	2.1	15	60	34	67	159	113	0.393	-1.348	0.00805885	0.0492976	down	NW_018743920.1	5806675	5809722	+	LOC110688143	--	--	centrosomal protein of 83 kDa-like isoform X1 [Chenopodium quinoa]	RecName: Full=Uncharacterized protein At5g41620;	SubName: Full=Uncharacterized protein {ECO:0000313|EMBL:KNA13156.1};	--	GO:0009507,chloroplast; GO:0005886,plasma membrane	Up-regulated During Septation
gene-LOC110688163	0.8	0.35	0.49	24.36	17.4	26.05	35	15	19	978	730	1088	0.031	-5.027	5.18342e-35	5.08043e-32	down	NW_018743920.1	5998047	6007345	-	LOC110688163	--	K03695 ATP-dependent Clp protease ATP-binding subunit ClpB | (RefSeq) chaperone protein ClpB1-like (A)	aluminum-activated malate transporter 2-like [Chenopodium quinoa]	RecName: Full=Aluminum-activated malate transporter 7; Short=AtALMT7;	SubName: Full=Uncharacterized protein {ECO:0000313|EMBL:KNA25976.1};	Predicted membrane protein	GO:0016021,integral component of membrane; GO:0009705,plant-type vacuole membrane; GO:0015140,malate transmembrane transporter activity	Aluminium activated malate transporter
gene-LOC110688164	3.96	6.8	2.56	20.69	22.87	20.44	205	345	117	979	1131	1006	0.259	-1.951	3.21961e-09	1.76865e-07	down	NW_018743920.1	6060490	6070054	+	LOC110688164	--	--	BEL1-like homeodomain protein 1 [Chenopodium quinoa]	RecName: Full=BEL1-like homeodomain protein 1; Short=BEL1-like protein 1; AltName: Full=Protein EMBRYO SAC DEVELOPMENT ARREST 29;	SubName: Full=Uncharacterized protein {ECO:0000313|EMBL:KNA25228.1};	Transcription factor MEIS1 and related HOX domain proteins	GO:0005737,cytoplasm; GO:0005634,nucleus; GO:0003677,DNA binding; GO:0003700,DNA-binding transcription factor activity; GO:0046982,protein heterodimerization activity; GO:0042803,protein homodimerization activity; GO:0010197,polar nucleus fusion; GO:0009737,response to abscisic acid; GO:0010201,response to continuous far red light stimulus by the high-irradiance response system; GO:0009610,respon…	Associated with HOX
gene-LOC110688197	0.35	0.68	0.58	1.41	4.3	1.16	34	64	49	125	397	107	0.3	-1.739	0.000454498	0.00543079	down	NW_018743920.1	6406222	6416646	-	LOC110688197	--	K10400 kinesin family member 15 | (RefSeq) kinesin-like protein KIN-12E isoform X1 (A)	kinesin-like protein KIN-12E isoform X1 [Chenopodium quinoa]	RecName: Full=Kinesin-like protein KIN-12E {ECO:0000305};	SubName: Full=Uncharacterized protein {ECO:0000313|EMBL:KNA12210.1};	Kinesin-like protein	GO:0005871,kinesin complex; GO:0005874,microtubule; GO:0005524,ATP binding; GO:0016887,ATPase activity; GO:0008017,microtubule binding; GO:0003777,microtubule motor activity; GO:0007018,microtubule-based movement	Kinesin motor domain
gene-LOC110688202	35.12	21.68	21.04	12.53	7.88	17.39	574	347	303	187	123	270	2.595	1.376	0.00135934	0.0129588	up	NW_018743920.1	6499216	6501318	+	LOC110688202	--	K08864 tousled-like kinase [EC:2.7.11.1] | (RefSeq) serine/threonine-protein kinase TOUSLED-like isoform X1 (A)	uncharacterized protein LOC110688202 [Chenopodium quinoa]	--	SubName: Full=Uncharacterized protein {ECO:0000313|EMBL:KNA06460.1};	Tousled-like protein kinase	--	Protein of unknown function (DUF3148)
gene-LOC110688204	1.5	3.28	3.02	6.03	19.69	6.33	68	146	121	250	854	273	0.311	-1.685	0.000294835	0.00385168	down	NW_018743920.1	6521947	6526124	-	LOC110688204	--	K05349 beta-glucosidase [EC:3.2.1.21] | (RefSeq) uncharacterized protein LOC110688204 (A)	uncharacterized protein LOC110688204 [Chenopodium quinoa]	RecName: Full=Probable beta-D-xylosidase 6; Short=AtBXL6; EC=3.2.1.-; Flags: Precursor;	SubName: Full=Uncharacterized protein {ECO:0000313|EMBL:KNA21260.1};	--	GO:0005578,NA; GO:0005774,vacuolar membrane; GO:0005773,vacuole; GO:0009044,xylan 1,4-beta-xylosidase activity; GO:0005975,carbohydrate metabolic process	Glycosyl hydrolase family 3 N terminal domain
gene-LOC110688206	0.49	0.8	0.72	1.43	3.21	1.28	46	73	59	122	286	114	0.432	-1.21	0.00181881	0.0161559	down	NW_018743920.1	6537474	6549982	+	LOC110688206	--	K16573 gamma-tubulin complex component 6 | (RefSeq) uncharacterized protein LOC110688206 isoform X1 (A)	uncharacterized protein LOC110688206 isoform X1 [Chenopodium quinoa]	RecName: Full=Gamma-tubulin complex component 3; Short=AtGCP3; Short=GCP-3; AltName: Full=Spindle pole body component 98; Short=AtSPC98;	SubName: Full=Uncharacterized protein {ECO:0000313|EMBL:KNA12914.1}; Flags: Fragment;	Gamma-tubulin complex, DGRIP91/SPC98 component	GO:0005938,cell cortex; GO:0055028,cortical microtubule; GO:0005737,cytoplasm; GO:0009898,cytoplasmic side of plasma membrane; GO:0000923,equatorial microtubule organizing center; GO:0000930,gamma-tubulin complex; GO:0008275,gamma-tubulin small complex; GO:0005874,microtubule; GO:0005635,nuclear envelope; GO:0005819,spindle; GO:0000922,spindle pole; GO:0043015,gamma-tubulin binding; GO:0005200,st…	Gamma tubulin complex component C-terminal
gene-LOC110688217	85.14	54.73	52.46	22.1	11.85	32.25	1881	1184	1021	446	250	677	3.636	1.862	3.05158e-05	0.00059882	up	NW_018743920.1	6620317	6622659	+	LOC110688217	--	K09838 zeaxanthin epoxidase [EC:1.14.15.21] | (RefSeq) zeaxanthin epoxidase, chloroplastic-like (A)	uncharacterized protein LOC110688217 [Chenopodium quinoa]	RecName: Full=Zeaxanthin epoxidase, chloroplastic; Short=AtZEP; EC=1.14.15.21; AltName: Full=Protein ABA DEFICIENT 1; Short=AtABA1; AltName: Full=Protein IMPAIRED IN BABA-INDUCED STERILITY 3; AltName: Full=Protein LOW EXPRESSION OF OSMOTIC STRESS-RESPONSIVE GENES 6; AltName: Full=Protein NON-PHOTOCHEMICAL QUENCHING 2; Flags: Precursor;	SubName: Full=Uncharacterized protein {ECO:0000313|EMBL:KNA14267.1};	--	GO:0009507,chloroplast; GO:0009941,chloroplast envelope; GO:0016020,membrane; GO:0071949,FAD binding; GO:0009540,zeaxanthin epoxidase [overall] activity; GO:0009688,abscisic acid biosynthetic process; GO:0009408,response to heat; GO:0010114,response to red light; GO:0009414,response to water deprivation; GO:0044550,secondary metabolite biosynthetic process; GO:0010182,sugar mediated signaling pat…	FHA domain
gene-LOC110688218	1.25	1.98	1.95	5.32	4.86	4.77	50	78	69	195	186	182	0.429	-1.22	3.8953e-06	0.00010415	down	NW_018743920.1	6628137	6637108	+	LOC110688218	--	--	--	--	--	--	--	--
gene-LOC110688232	0.42	0.76	0.52	1.85	3.61	1.64	13	23	14	52	106	48	0.304	-1.717	0.000227567	0.00311378	down	NW_018743920.1	6731411	6735112	+	LOC110688232	--	K22817 non-structural maintenance of chromosomes element 1 [EC:2.3.2.27] | (RefSeq) non-structural maintenance of chromosomes element 1 homolog (A)	non-structural maintenance of chromosomes element 1 homolog [Chenopodium quinoa]	--	SubName: Full=Uncharacterized protein {ECO:0000313|EMBL:KNA23208.1};	Non-SMC (structural maintenance of chromosomes) element 1 protein (NSE1)	GO:0030915,Smc5-Smc6 complex; GO:0006281,DNA repair	Nse1 non-SMC component of SMC5-6 complex
gene-LOC110688233	6.18	6.71	11.19	4.2	3.03	1.81	79	84	126	49	37	22	3.347	1.743	5.25901e-05	0.000944301	up	NW_018743920.1	6735929	6738061	+	LOC110688233	--	K03007 DNA-directed RNA polymerases I, II, and III subunit RPABC5 | (RefSeq) DNA-directed RNA polymerases I, II, and III subunit RPABC5 (A)	RNA polymerases N / 8 kDa subunit [Theobroma cacao]	RecName: Full=DNA-directed RNA polymerase subunit 10-like protein {ECO:0000303|PubMed:19110459}; AltName: Full=ABC10 {ECO:0000303|PubMed:19110459}; AltName: Full=DNA-directed RNA polymerase III subunit L {ECO:0000303|PubMed:19110459}; AltName: Full=DNA-directed RNA polymerases I, II, and III subunit RPABC5 {ECO:0000303|PubMed:19110459}; Short=RNA polymerases I, II, and III subunit ABC5 {ECO:00003…	SubName: Full=RNA polymerases N / 8 kDa subunit {ECO:0000313|EMBL:EOY00528.1};	DNA-directed RNA polymerase, subunit RPB10	GO:0005736,RNA polymerase I complex; GO:0005665,RNA polymerase II, core complex; GO:0005666,RNA polymerase III complex; GO:0003677,DNA binding; GO:0003899,DNA-directed 5'-3' RNA polymerase activity; GO:0008270,zinc ion binding; GO:0006360,transcription by RNA polymerase I; GO:0006366,transcription by RNA polymerase II; GO:0006383,transcription by RNA polymerase III	RNA polymerases N / 8 kDa subunit
gene-LOC110688235	49.97	33.44	40.37	11.04	5.95	12.69	1724	1130	1227	348	196	416	5.222	2.385	7.75241e-10	4.83649e-08	up	NW_018743920.1	6769681	6771373	-	LOC110688235	--	K20716 mitogen-activated protein kinase kinase kinase 17/18 | (RefSeq) mitogen-activated protein kinase kinase kinase NPK1-like (A)	mitogen-activated protein kinase kinase kinase 18-like [Chenopodium quinoa]	RecName: Full=Mitogen-activated protein kinase kinase kinase 17 {ECO:0000303|PubMed:25720833}; EC=2.7.11.25 {ECO:0000250|UniProtKB:Q9ZVP5, ECO:0000255|PROSITE-ProRule:PRU00159};	SubName: Full=Uncharacterized protein {ECO:0000313|EMBL:KNA23213.1};	MEKK and related serine/threonine protein kinases	GO:0005737,cytoplasm; GO:0005634,nucleus; GO:0005524,ATP binding; GO:0004709,MAP kinase kinase kinase activity; GO:0004674,protein serine/threonine kinase activity; GO:0004702,NA; GO:0009738,abscisic acid-activated signaling pathway; GO:0032147,activation of protein kinase activity; GO:0007346,regulation of mitotic cell cycle; GO:0009737,response to abscisic acid; GO:0006970,response to osmotic s…	Protein kinase domain
gene-LOC110688250	1.59	2.14	1.56	9.34	9.93	9.87	94	124	81	504	560	554	0.227	-2.14	5.39545e-24	2.33667e-21	down	NW_018743920.1	6929269	6934553	-	LOC110688250	--	--	--	--	--	--	--	--
gene-LOC110688265	2.16	3.82	3.62	0	0	0	157	272	232	0	0	0	1468.72	10.52	6.25659e-18	1.25283e-15	up	NW_018742309.1	3808891	3812971	-	LOC110688265	--	--	K(+) efflux antiporter 5-like isoform X1 [Chenopodium quinoa]	RecName: Full=K(+) efflux antiporter 5 {ECO:0000303|PubMed:11500563}; Short=AtKEA5 {ECO:0000303|PubMed:11500563}; Flags: Precursor;	SubName: Full=Uncharacterized protein {ECO:0000313|EMBL:KNA17736.1};	Predicted K+/H+-antiporter	GO:0016021,integral component of membrane; GO:0016020,membrane; GO:0022890,inorganic cation transmembrane transporter activity; GO:0015299,solute:proton antiporter activity; GO:0006813,potassium ion transport	Sodium/hydrogen exchanger family
gene-LOC110688271	41.65	10.7	11.87	5.59	4.67	9.13	1820	458	457	223	195	379	4.342	2.118	0.00034205	0.00431999	up	NW_018743920.1	7095407	7098515	+	LOC110688271	--	K11778 ditrans,polycis-polyprenyl diphosphate synthase [EC:2.5.1.87] | (RefSeq) dehydrodolichyl diphosphate synthase 2-like (A)	dehydrodolichyl diphosphate synthase 2-like [Chenopodium quinoa]	RecName: Full=Dehydrodolichyl diphosphate synthase 2; Short=Dedol-PP synthase 2; EC=2.5.1.-;	RecName: Full=Alkyl transferase {ECO:0000256|RuleBase:RU363018}; EC=2.5.1.- {ECO:0000256|RuleBase:RU363018};	Cis-prenyltransferase	GO:0009507,chloroplast; GO:0009570,chloroplast stroma; GO:0005829,cytosol; GO:0002094,polyprenyltransferase activity; GO:0009668,plastid membrane organization; GO:0016094,polyprenol biosynthetic process; GO:0006486,protein glycosylation	Putative undecaprenyl diphosphate synthase
gene-LOC110688278	10.8	11.36	6.94	4.89	5.83	6.22	433	446	245	179	223	237	2.167	1.116	0.000129653	0.0019901	up	NW_018743920.1	7133290	7135942	-	LOC110688278	--	K15535 phosphoglucan, water dikinase [EC:2.7.9.5] | (RefSeq) PWD1; phosphoglucan water dikinase (A)	uncharacterized protein LOC110688278 [Chenopodium quinoa]	RecName: Full=Phosphoglucan, water dikinase, chloroplastic; EC=2.7.9.5; Flags: Precursor;	SubName: Full=Uncharacterized protein {ECO:0000313|EMBL:KNA24158.1};	--	GO:0009507,chloroplast; GO:0009570,chloroplast stroma; GO:0009536,plastid; GO:0102217,6-phosphoglucan, water dikinase activity; GO:0005524,ATP binding; GO:0019200,carbohydrate kinase activity; GO:0046872,metal ion binding; GO:0051752,phosphoglucan, water dikinase activity; GO:2001070,starch binding; GO:0046777,protein autophosphorylation; GO:0005983,starch catabolic process; GO:0005982,starch met…	Starch binding domain
gene-LOC110688281	0.23	1.18	0.54	2.68	6.28	3.34	12	61	25	129	316	167	0.195	-2.357	8.20706e-06	0.000196321	down	NW_018743920.1	7150897	7154907	-	LOC110688281	--	K01657 anthranilate synthase component I [EC:4.1.3.27] | (RefSeq) anthranilate synthase alpha subunit 2, chloroplastic-like (A)	anthranilate synthase alpha subunit 2, chloroplastic-like [Chenopodium quinoa]	RecName: Full=Anthranilate synthase alpha subunit 2, chloroplastic; EC=4.1.3.27; AltName: Full=Anthranilate synthase component 1-2; AltName: Full=Anthranilate synthase component I-2; Flags: Precursor;	SubName: Full=Uncharacterized protein {ECO:0000313|EMBL:KNA24153.1};	Isochorismate synthase	GO:0005950,anthranilate synthase complex; GO:0009507,chloroplast; GO:0004049,anthranilate synthase activity; GO:0000162,tryptophan biosynthetic process	chorismate binding enzyme
gene-LOC110688288	0.14	0.63	0.59	2.09	4.03	2.43	7	31	26	96	193	116	0.196	-2.353	2.3238e-06	6.61696e-05	down	NW_018743920.1	7185778	7192348	-	LOC110688288	--	K02213 cell division control protein 6 | (RefSeq) cell division control protein 6 homolog B-like isoform X1 (A)	cell division control protein 6 homolog B-like isoform X1 [Chenopodium quinoa]	RecName: Full=Cell division control protein 6 homolog B {ECO:0000305}; Short=AtCDC6b {ECO:0000303|PubMed:11752380};	RecName: Full=Cell division control protein {ECO:0000256|PIRNR:PIRNR001767};	Pre-initiation complex, subunit CDC6, AAA+ superfamily ATPase	GO:0005634,nucleus; GO:0007049,cell cycle; GO:0051301,cell division; GO:0006270,DNA replication initiation	AAA domain
gene-LOC110688297	0.03	0	0	9.81	8.01	6.09	1	0	0	333	284	215	0.002	-9.288	2.84825e-14	3.74851e-12	down	NW_018742309.1	3831039	3834125	+	LOC110688297	--	--	--	--	--	--	--	--
gene-LOC110688300	31.69	7.38	28.13	7.66	6.94	5.11	1899	433	1485	419	397	291	4.475	2.162	2.64293e-05	0.000530366	up	NW_018743920.1	7342916	7348017	-	LOC110688300	--	K03147 phosphomethylpyrimidine synthase [EC:4.1.99.17] | (RefSeq) phosphomethylpyrimidine synthase, chloroplastic isoform X1 (A)	phosphomethylpyrimidine synthase, chloroplastic isoform X1 [Chenopodium quinoa]	RecName: Full=Phosphomethylpyrimidine synthase, chloroplastic; EC=4.1.99.17; AltName: Full=Hydroxymethylpyrimidine phosphate synthase; Short=HMP-P synthase; Short=HMP-phosphate synthase; Short=HMPP synthase; AltName: Full=Protein PYRIMIDINE REQUIRING; AltName: Full=Thiamine biosynthesis protein ThiC; Short=Protein THIAMINE C; Flags: Precursor;	SubName: Full=Uncharacterized protein {ECO:0000313|EMBL:KNA05284.1};	--	GO:0009507,chloroplast; GO:0009570,chloroplast stroma; GO:0009536,plastid; GO:0051539,4 iron, 4 sulfur cluster binding; GO:0080041,ADP-ribose pyrophosphohydrolase activity; GO:0016830,carbon-carbon lyase activity; GO:0051536,iron-sulfur cluster binding; GO:0046872,metal ion binding; GO:0019904,protein domain specific binding; GO:0010266,response to vitamin B1; GO:0009228,thiamine biosynthetic pro…	Radical SAM ThiC family
gene-LOC110688302	0	0	0	5.57	6.15	3.43	0	0	0	39	45	25	0.006	-7.301	3.34539e-08	1.49971e-06	down	NW_018742309.1	3834144	3842105	+	LOC110688302	--	--	--	--	--	--	--	--
gene-LOC110688306	1.75	2.78	1.06	0.18	0.12	0.32	75	117	40	7	5	13	11.058	3.467	2.80524e-09	1.55942e-07	up	NW_018743920.1	7416364	7419334	-	LOC110688306	--	K05909 laccase [EC:1.10.3.2] | (RefSeq) laccase-4-like (A)	laccase-4-like [Chenopodium quinoa]	RecName: Full=Laccase-4; EC=1.10.3.2; AltName: Full=Benzenediol:oxygen oxidoreductase 4; AltName: Full=Diphenol oxidase 4; AltName: Full=Protein IRREGULAR XYLEM 12; AltName: Full=Urishiol oxidase 4; Flags: Precursor;	RecName: Full=Laccase {ECO:0000256|RuleBase:RU361119}; EC=1.10.3.2 {ECO:0000256|RuleBase:RU361119}; AltName: Full=Benzenediol:oxygen oxidoreductase {ECO:0000256|RuleBase:RU361119}; AltName: Full=Diphenol oxidase {ECO:0000256|RuleBase:RU361119}; AltName: Full=Urishiol oxidase {ECO:0000256|RuleBase:RU361119};	Multicopper oxidases	GO:0048046,apoplast; GO:0005507,copper ion binding; GO:0052716,hydroquinone:oxygen oxidoreductase activity; GO:0016491,oxidoreductase activity; GO:0016722,oxidoreductase activity, oxidizing metal ions; GO:0009809,lignin biosynthetic process; GO:0046274,lignin catabolic process; GO:0009834,plant-type secondary cell wall biogenesis	Multicopper oxidase
gene-LOC110688308	0	0	0	1.42	2.16	0.76	0	0	0	27	43	15	0.008	-6.921	6.7601e-07	2.24203e-05	down	NW_018742309.1	3813030	3816147	+	LOC110688308	--	--	--	--	--	--	--	--
gene-LOC110688327	11.35	5.13	9.15	2.51	3.31	2.68	183	81	130	37	51	41	3.915	1.969	4.24581e-06	0.000112232	up	NW_018743920.1	7580489	7581848	-	LOC110688327	--	--	uncharacterized protein LOC110688327 [Chenopodium quinoa]	--	SubName: Full=Uncharacterized protein {ECO:0000313|EMBL:KNA02968.1};	--	--	--
gene-LOC110688331	2.81	9.84	13.98	24.03	58.17	19.77	69	237	303	540	1366	462	0.328	-1.607	0.00250626	0.0206015	down	NW_018743920.1	7595903	7598332	+	LOC110688331	--	K04802 proliferating cell nuclear antigen | (RefSeq) proliferating cell nuclear antigen (A)	proliferating cell nuclear antigen [Chenopodium quinoa]	RecName: Full=Proliferating cell nuclear antigen; Short=PCNA;	RecName: Full=Proliferating cell nuclear antigen {ECO:0000256|RuleBase:RU000641};	DNA polymerase delta processivity factor (proliferating cell nuclear antigen)	GO:0005634,nucleus; GO:0003677,DNA binding; GO:0030337,DNA polymerase processivity factor activity; GO:0006260,DNA replication; GO:0006275,regulation of DNA replication	Proliferating cell nuclear antigen, C-terminal domain
gene-LOC110688344	43.45	35.17	35.26	9.08	5.19	16.04	912	723	652	174	104	320	4.641	2.214	6.63754e-07	2.20334e-05	up	NW_018743920.1	7757230	7758259	+	LOC110688344	--	K14686 solute carrier family 31 (copper transporter), member 1 | (RefSeq) copper transporter 6-like (A)	copper transporter 6-like [Chenopodium quinoa]	RecName: Full=Copper transporter 6; Short=AtCOPT6;	SubName: Full=Uncharacterized protein {ECO:0000313|EMBL:KNA10675.1};	Copper transporter	GO:0016021,integral component of membrane; GO:0005773,vacuole; GO:0005375,copper ion transmembrane transporter activity	Ctr copper transporter family
gene-LOC110688347	67.36	42.95	59.7	33.75	31.51	39.19	1355	846	1058	620	605	749	2.068	1.048	0.000517643	0.00604102	up	NW_018743920.1	7761505	7763399	+	LOC110688347	--	--	universal stress protein PHOS34-like [Chenopodium quinoa]	RecName: Full=Universal stress protein A-like protein;	SubName: Full=Uncharacterized protein {ECO:0000313|EMBL:ESW04023.1};	--	GO:0005886,plasma membrane; GO:0016208,AMP binding; GO:0006950,response to stress	Universal stress protein family
gene-LOC110688372	1.84	2.11	2.08	1.18	1.5	0.95	147	165	146	86	114	72	2.105	1.074	1.03303e-05	0.000238651	up	NW_018743920.1	7938241	7942151	-	LOC110688372	--	K01176 alpha-amylase [EC:3.2.1.1] | (RefSeq) lectin-domain containing receptor kinase VI.3-like (A)	L-type lectin-domain containing receptor kinase IV.1-like [Chenopodium quinoa]	RecName: Full=L-type lectin-domain containing receptor kinase IV.2 {ECO:0000303|PubMed:19773388}; Short=Arabidopsis thaliana lectin-receptor kinase a4 {ECO:0000303|PubMed:19773388}; Short=AthlecRK-a4 {ECO:0000303|Ref.6}; Short=LecRK-IV.2 {ECO:0000303|PubMed:19773388}; EC=2.7.11.1 {ECO:0000255|PROSITE-ProRule:PRU00159}; AltName: Full=Protein SMALL, GLUED-TOGETHER, AND COLLAPSED POLLEN {ECO:0000303…	SubName: Full=Uncharacterized protein {ECO:0000313|EMBL:KNA02682.1};	--	GO:0016021,integral component of membrane; GO:0005886,plasma membrane; GO:0005524,ATP binding; GO:0030246,carbohydrate binding; GO:0004674,protein serine/threonine kinase activity; GO:0042742,defense response to bacterium; GO:0009555,pollen development	Legume lectin domain
gene-LOC110688373	0.51	0.08	0.16	3.76	1.98	6.46	25	4	7	169	93	302	0.08	-3.649	4.69098e-07	1.62981e-05	down	NW_018743920.1	7945639	7948053	-	LOC110688373	--	K01176 alpha-amylase [EC:3.2.1.1] | (RefSeq) lectin-domain containing receptor kinase VI.3-like (A)	L-type lectin-domain containing receptor kinase IV.2-like [Chenopodium quinoa]	RecName: Full=L-type lectin-domain containing receptor kinase IV.2 {ECO:0000303|PubMed:19773388}; Short=Arabidopsis thaliana lectin-receptor kinase a4 {ECO:0000303|PubMed:19773388}; Short=AthlecRK-a4 {ECO:0000303|Ref.6}; Short=LecRK-IV.2 {ECO:0000303|PubMed:19773388}; EC=2.7.11.1 {ECO:0000255|PROSITE-ProRule:PRU00159}; AltName: Full=Protein SMALL, GLUED-TOGETHER, AND COLLAPSED POLLEN {ECO:0000303…	SubName: Full=Uncharacterized protein {ECO:0000313|EMBL:KNA02682.1};	--	GO:0016021,integral component of membrane; GO:0005886,plasma membrane; GO:0005524,ATP binding; GO:0030246,carbohydrate binding; GO:0004674,protein serine/threonine kinase activity; GO:0042742,defense response to bacterium; GO:0009555,pollen development	Legume lectin domain
gene-LOC110688374	0.91	1.86	0.84	0.59	0.32	0.52	44	88	36	26	15	24	3.069	1.618	0.00108771	0.0108815	up	NW_018743920.1	7950748	7953123	-	LOC110688374	--	K01176 alpha-amylase [EC:3.2.1.1] | (RefSeq) lectin-domain containing receptor kinase VI.3-like (A)	L-type lectin-domain containing receptor kinase IV.2-like [Chenopodium quinoa]	RecName: Full=L-type lectin-domain containing receptor kinase IV.2 {ECO:0000303|PubMed:19773388}; Short=Arabidopsis thaliana lectin-receptor kinase a4 {ECO:0000303|PubMed:19773388}; Short=AthlecRK-a4 {ECO:0000303|Ref.6}; Short=LecRK-IV.2 {ECO:0000303|PubMed:19773388}; EC=2.7.11.1 {ECO:0000255|PROSITE-ProRule:PRU00159}; AltName: Full=Protein SMALL, GLUED-TOGETHER, AND COLLAPSED POLLEN {ECO:0000303…	SubName: Full=Uncharacterized protein {ECO:0000313|EMBL:KNA02682.1};	--	GO:0016021,integral component of membrane; GO:0005886,plasma membrane; GO:0005524,ATP binding; GO:0030246,carbohydrate binding; GO:0004674,protein serine/threonine kinase activity; GO:0042742,defense response to bacterium; GO:0009555,pollen development	Legume lectin domain
gene-LOC110688383	1.71	3.03	2.63	5.4	9.46	6.65	48	83	65	138	253	177	0.429	-1.22	5.53528e-05	0.00098689	down	NW_018743920.1	7997961	8002500	+	LOC110688383	--	K16283 E3 ubiquitin-protein ligase SDIR1 [EC:2.3.2.27] | (RefSeq) E3 ubiquitin-protein ligase SDIR1-like (A)	E3 ubiquitin-protein ligase SDIR1-like [Chenopodium quinoa]	RecName: Full=E3 ubiquitin-protein ligase SDIR1 {ECO:0000305}; EC=2.3.2.27 {ECO:0000269|PubMed:17573536}; AltName: Full=Protein SALT- AND DROUGHT-INDUCED RING FINGER 1 {ECO:0000303|PubMed:17573536}; AltName: Full=RING-type E3 ubiquitin transferase SDIR1 {ECO:0000305};	SubName: Full=Uncharacterized protein {ECO:0000313|EMBL:KNA12839.1};	FOG: Predicted E3 ubiquitin ligase	GO:0005789,endoplasmic reticulum membrane; GO:0016021,integral component of membrane; GO:0043231,intracellular membrane-bounded organelle; GO:0031090,organelle membrane; GO:0046872,metal ion binding; GO:0061630,ubiquitin protein ligase activity; GO:0004842,ubiquitin-protein transferase activity; GO:0009789,positive regulation of abscisic acid-activated signaling pathway; GO:0043161,proteasome-med…	Ring finger domain
gene-LOC110688423	0.02	0.14	0.06	0.75	1.01	0.8	1	7	3	36	51	40	0.106	-3.242	1.39213e-06	4.1882e-05	down	NW_018743920.1	8416095	8419432	-	LOC110688423	--	--	protein TRM32-like [Chenopodium quinoa]	RecName: Full=Protein TRM32; AltName: Full=TON1-RECRUITING MOTIF protein 32;	SubName: Full=Uncharacterized protein {ECO:0000313|EMBL:KNA06602.1};	--	--	Domain of unknown function (DUF4378)
gene-LOC110688424	0	0.11	0.09	0.58	1.97	0.47	0	4	3	19	68	16	0.086	-3.531	0.000292575	0.00383471	down	NW_018743920.1	8424064	8428261	-	LOC110688424	--	--	--	--	--	--	--	--
gene-LOC110688446	4.82	18.33	2.77	59.06	91.38	73.08	231	861	117	2588	4185	3331	0.14	-2.833	2.60554e-07	9.61777e-06	down	NW_018743920.1	8710638	8713855	-	LOC110688446	--	K03283 heat shock 70kDa protein 1/2/6/8 | (RefSeq) probable mediator of RNA polymerase II transcription subunit 37c (A)	probable mediator of RNA polymerase II transcription subunit 37c [Chenopodium quinoa]	RecName: Full=Probable mediator of RNA polymerase II transcription subunit 37c; AltName: Full=Heat shock 70 kDa protein 4; AltName: Full=Heat shock cognate 70 kDa protein 4; AltName: Full=Heat shock cognate protein 70-4; Short=AtHsc70-4; AltName: Full=Heat shock protein 70-4; Short=AtHsp70-4;	SubName: Full=Heat shock protein 70 {ECO:0000313|EMBL:AOZ81415.1};	Molecular chaperones HSP70/HSC70, HSP70 superfamily	GO:0048046,apoplast; GO:0005618,cell wall; GO:0005829,cytosol; GO:0005794,Golgi apparatus; GO:0005739,mitochondrion; GO:0005634,nucleus; GO:0005886,plasma membrane; GO:0005774,vacuolar membrane; GO:0005524,ATP binding; GO:0031625,ubiquitin protein ligase binding; GO:0016567,protein ubiquitination; GO:0006355,regulation of transcription, DNA-templated; GO:0009617,response to bacterium; GO:0046686,…	Hsp70 protein
gene-LOC110688449	0.46	4.51	2.04	8.67	17.74	4.41	10	96	39	172	368	91	0.28	-1.835	0.00697803	0.0445868	down	NW_018743920.1	8731779	8732844	+	LOC110688449	--	K12173 BRCA1-A complex subunit BRE | (RefSeq) BRCA1-A complex subunit BRE-like (A)	osmotin-like protein [Chenopodium quinoa]	RecName: Full=Osmotin-like protein; Flags: Precursor;	SubName: Full=Uncharacterized protein {ECO:0000313|EMBL:KNA11472.1};	--	GO:0005618,cell wall; GO:0005576,extracellular region	Thaumatin family
gene-LOC110688453	0.75	0.15	0.11	0	0	0	15	3	2	0	0	0	46.77	5.547	0.00397171	0.0292634	up	NW_018743920.1	8758332	8759851	-	LOC110688453	--	--	jasmonate-induced protein homolog [Chenopodium quinoa]	RecName: Full=Jasmonate-induced protein homolog;	SubName: Full=Uncharacterized protein {ECO:0000313|EMBL:KNA23164.1};	--	--	--
gene-LOC110688458	30.63	94.48	84.81	178.03	466.24	105.07	344	1039	839	1826	4998	1121	0.356	-1.491	0.00335207	0.0258607	down	NW_018743920.1	8810098	8810705	-	LOC110688458	--	K11254 histone H4 | (RefSeq) histone H4 (A)	hypothetical protein SETIT_032292mg, partial [Setaria italica]	RecName: Full=Histone H4;	RecName: Full=Histone H4 {ECO:0000256|RuleBase:RU000528}; Flags: Fragment;	Histone H4	GO:0009507,chloroplast; GO:0005829,cytosol; GO:0000788,nuclear nucleosome; GO:0005730,nucleolus; GO:0005886,plasma membrane; GO:0009506,plasmodesma; GO:0009579,thylakoid; GO:0005774,vacuolar membrane; GO:0003677,DNA binding; GO:0042393,histone binding; GO:0046982,protein heterodimerization activity; GO:0006334,nucleosome assembly; GO:0009414,response to water deprivation	Centromere kinetochore component CENP-T histone fold
gene-LOC110688459	159.84	131.16	183.4	106.59	103.79	76.19	2036	1636	2058	1240	1262	922	2.107	1.075	9.09093e-06	0.000214706	up	NW_018743920.1	8822708	8825505	+	LOC110688459	--	--	uncharacterized protein LOC110684096 [Chenopodium quinoa]	RecName: Full=ATP synthase 6 kDa subunit, mitochondrial; Flags: Fragment;	SubName: Full=Uncharacterized protein {ECO:0000313|EMBL:KNA21711.1};	--	GO:0005743,mitochondrial inner membrane; GO:0045263,proton-transporting ATP synthase complex, coupling factor F(o); GO:0015992,NA	--
gene-LOC110688460	35.45	18.08	26.59	8.49	4.3	8.29	1450	724	958	317	168	322	4.813	2.267	7.72362e-08	3.24314e-06	up	NW_018743920.1	8827909	8832835	+	LOC110688460	--	--	--	--	--	--	--	--
gene-LOC110688461	0	0.62	0.09	1.6	2.86	1.09	0	24	3	58	108	41	0.152	-2.714	0.00548172	0.0372877	down	NW_018742309.1	4938670	4973724	+	LOC110688461	--	K05954 protein farnesyltransferase subunit beta [EC:2.5.1.58] | (RefSeq) LOW QUALITY PROTEIN: protein farnesyltransferase subunit beta-like (A)	LOW QUALITY PROTEIN: protein farnesyltransferase subunit beta-like [Chenopodium quinoa]	RecName: Full=Protein farnesyltransferase subunit beta; Short=FTase-beta; EC=2.5.1.58; AltName: Full=CAAX farnesyltransferase subunit beta; AltName: Full=Ras proteins prenyltransferase subunit beta;	SubName: Full=Uncharacterized protein {ECO:0000313|EMBL:KMS99434.1};	Beta subunit of farnesyltransferase	GO:0005965,protein farnesyltransferase complex; GO:0004660,protein farnesyltransferase activity; GO:0008270,zinc ion binding; GO:0018343,protein farnesylation; GO:0042127,regulation of cell proliferation	Prenyltransferase and squalene oxidase repeat
gene-LOC110688466	21.93	53.01	52.39	153.39	454.16	87.9	324	767	682	2070	6406	1234	0.235	-2.088	5.23874e-05	0.000941684	down	NW_018743920.1	8859778	8860502	-	LOC110688466	--	K11252 histone H2B | (RefSeq) probable histone H2B.1 (A)	PREDICTED: probable histone H2B.1 isoform X1 [Beta vulgaris subsp. vulgaris]	RecName: Full=Histone H2B.11;	RecName: Full=Histone H2B {ECO:0000256|RuleBase:RU000451};	Histone H2B	GO:0000786,nucleosome; GO:0005634,nucleus; GO:0003677,DNA binding; GO:0046982,protein heterodimerization activity	Core histone H2A/H2B/H3/H4
gene-LOC110688470	19.46	64.13	86.58	197.58	697.72	141.24	299	965	1172	2773	10235	2062	0.21	-2.252	0.000131014	0.00200312	down	NW_018743920.1	8877668	8878778	+	LOC110688470	--	K11251 histone H2A | (RefSeq) histone H2A-like (A)	histone H2A-like [Chenopodium quinoa]	RecName: Full=Histone H2A;	RecName: Full=Histone H2A {ECO:0000256|RuleBase:RU003767};	Histone 2A	GO:0000786,nucleosome; GO:0005634,nucleus; GO:0003677,DNA binding; GO:0046982,protein heterodimerization activity	C-terminus of histone H2A
gene-LOC110688471	45.58	75.52	77.47	142.54	396.86	84.61	1112	1804	1665	3176	9242	1961	0.412	-1.278	0.00568723	0.0382971	down	NW_018743920.1	8888723	8892106	-	LOC110688471	--	--	--	--	--	--	--	--
gene-LOC110688475	130.15	55.36	155.91	44.6	35.77	55.96	2984	1243	3149	934	783	1219	3.173	1.666	0.000111513	0.00175461	up	NW_018743920.1	9074789	9075913	-	LOC110688475	--	K14841 ribosome biogenesis protein NSA1 | (RefSeq) WD repeat-containing protein DDB_G0290555 (A)	zinc finger protein ZAT8-like [Chenopodium quinoa]	RecName: Full=Zinc finger protein ZAT12; AltName: Full=Protein RESPONSIVE TO HIGH LIGHT 41;	SubName: Full=Uncharacterized protein {ECO:0000313|EMBL:KNA11901.1};	FOG: Zn-finger	GO:0005634,nucleus; GO:0003700,DNA-binding transcription factor activity; GO:0046872,metal ion binding; GO:0043565,sequence-specific DNA binding; GO:0009631,cold acclimation; GO:0042538,hyperosmotic salinity response; GO:0009643,photosynthetic acclimation; GO:0010200,response to chitin; GO:0009409,response to cold; GO:0009408,response to heat; GO:0009416,response to light stimulus; GO:0006979,res…	C2H2-type zinc finger
gene-LOC110688480	1.69	1.81	1.24	0.62	0.55	0.34	42	44	27	14	13	8	3.998	1.999	6.32557e-05	0.00110076	up	NW_018743920.1	9138205	9139619	+	LOC110688480	--	K09422 transcription factor MYB, plant | (RefSeq) transcription factor MYB48-like (A)	transcription factor MYB48-like [Chenopodium quinoa]	RecName: Full=Transcription factor MYB48; AltName: Full=Myb-related protein 48; Short=AtMYB48;	SubName: Full=Uncharacterized protein {ECO:0000313|EMBL:KNA05849.1};	Transcription factor, Myb superfamily	GO:0005634,nucleus; GO:0003700,DNA-binding transcription factor activity; GO:0000981,DNA-binding transcription factor activity, RNA polymerase II-specific; GO:0043565,sequence-specific DNA binding; GO:0001135,RNA polymerase II transcription regulator recruiting activity; GO:0044212,transcription regulatory region DNA binding; GO:0030154,cell differentiation; GO:0006357,regulation of transcription…	Myb-like DNA-binding domain
gene-LOC110688482	4.24	1.51	3.02	1.35	0.31	0.31	86	30	54	25	6	6	5.74	2.521	0.000688236	0.00758872	up	NW_018743920.1	9150875	9152231	-	LOC110688482	--	K09873 aquaporin TIP | (RefSeq) aquaporin TIP1-3-like (A)	aquaporin TIP1-3-like [Chenopodium quinoa]	RecName: Full=Aquaporin TIP1-3; AltName: Full=Gamma-tonoplast intrinsic protein 3; Short=Gamma-TIP3; AltName: Full=Tonoplast intrinsic protein 1-3; Short=AtTIP1;3;	SubName: Full=Uncharacterized protein {ECO:0000313|EMBL:KNA13069.1};	Aquaporin (major intrinsic protein family)	GO:0042807,central vacuole; GO:0005887,integral component of plasma membrane; GO:0009705,plant-type vacuole membrane; GO:0015204,urea transmembrane transporter activity; GO:0015250,water channel activity; GO:0034220,ion transmembrane transport; GO:0015840,urea transport; GO:0006833,water transport	Major intrinsic protein
gene-LOC110688515	17.37	10.18	12.51	8.2	4.76	8.95	566	325	359	244	148	277	2.31	1.208	0.0025687	0.0210058	up	NW_018743920.1	9563171	9567007	+	LOC110688515	--	--	shewanella-like protein phosphatase 1 isoform X1 [Chenopodium quinoa]	RecName: Full=Shewanella-like protein phosphatase 1 {ECO:0000303|PubMed:21976480}; Short=AtSLP1 {ECO:0000303|PubMed:21976480}; EC=3.1.-.- {ECO:0000305}; Flags: Precursor;	SubName: Full=Uncharacterized protein {ECO:0000313|EMBL:KNA08919.1};	Serine/threonine specific protein phosphatase PP1, catalytic subunit	GO:0009507,chloroplast; GO:0030145,manganese ion binding; GO:0016791,phosphatase activity; GO:0004721,phosphoprotein phosphatase activity	Calcineurin-like phosphoesterase
gene-LOC110688521	3620.84	3372.53	4268.61	1872.57	1809.51	2643.58	75047	68451	77941	35449	35803	52058	2.22	1.151	1.80147e-05	0.000384283	up	NW_018743920.1	9575910	9576926	-	LOC110688521	--	K08912 light-harvesting complex II chlorophyll a/b binding protein 1 | (RefSeq) chlorophyll a-b binding protein, chloroplastic (A)	chlorophyll a-b binding protein, chloroplastic [Chenopodium quinoa]	RecName: Full=Chlorophyll a-b binding protein, chloroplastic; AltName: Full=LHCII type I CAB; Short=LHCP; Flags: Precursor;	RecName: Full=Chlorophyll a-b binding protein, chloroplastic {ECO:0000256|RuleBase:RU363080};	--	GO:0009535,chloroplast thylakoid membrane; GO:0016021,integral component of membrane; GO:0009522,photosystem I; GO:0009523,photosystem II; GO:0016168,chlorophyll binding; GO:0046872,metal ion binding; GO:0009765,photosynthesis, light harvesting; GO:0018298,protein-chromophore linkage	Chlorophyll A-B binding protein
gene-LOC110688533	1533.9	673.21	1440.07	336.74	183.54	267.9	51049	21940	42221	10236	5831	8471	5.887	2.557	9.18375e-10	5.64437e-08	up	NW_018742309.1	5293395	5299115	-	LOC110688533	--	K00499 choline monooxygenase [EC:1.14.15.7] | (RefSeq) choline monooxygenase, chloroplastic-like (A)	choline monooxygenase, chloroplastic-like [Chenopodium quinoa]	RecName: Full=Choline monooxygenase, chloroplastic; EC=1.14.15.7; Flags: Precursor;	SubName: Full=Choline monooxygenase {ECO:0000313|EMBL:AFG28558.1};	--	GO:0009570,chloroplast stroma; GO:0051537,2 iron, 2 sulfur cluster binding; GO:0019133,choline monooxygenase activity; GO:0005506,iron ion binding; GO:0016708,oxidoreductase activity, acting on paired donors, with incorporation or reduction of molecular oxygen, NAD(P)H as one donor, and incorporation of two atoms of oxygen into one donor; GO:0019439,aromatic compound catabolic process; GO:0019285…	Ring hydroxylating alpha subunit (catalytic domain)
gene-LOC110688538	14.28	17.5	13.7	2.7	4.62	3.01	110	132	93	19	34	22	5.568	2.477	7.92277e-14	9.48822e-12	up	NW_018743920.1	4382786	4383163	+	LOC110688538	--	K07441 beta-1,4-N-acetylglucosaminyltransferase [EC:2.4.1.141] | (RefSeq) UDP-N-acetylglucosamine transferase subunit ALG14 homolog (A)	auxin-responsive protein SAUR41-like [Chenopodium quinoa]	RecName: Full=Auxin-responsive protein SAUR41 {ECO:0000305}; AltName: Full=Protein SMALL AUXIN UP RNA 41 {ECO:0000303|PubMed:12036261};	SubName: Full=Uncharacterized protein {ECO:0000313|EMBL:KNA03323.1};	--	GO:0005737,cytoplasm; GO:0060918,auxin transport; GO:0009734,auxin-activated signaling pathway; GO:0009958,positive gravitropism; GO:0040008,regulation of growth; GO:0090057,root radial pattern formation	Auxin responsive protein
gene-LOC110688574	60.01	50.09	31.21	7.78	7.79	32.08	3977	3251	1822	471	493	2020	3.645	1.866	0.00138033	0.0131049	up	NW_018743920.1	6565455	6576506	+	LOC110688574	--	K16297 serine carboxypeptidase-like clade II [EC:3.4.16.-] | (RefSeq) uncharacterized protein LOC110761164 (A)	uncharacterized protein LOC110688574 [Chenopodium quinoa]	RecName: Full=Serine carboxypeptidase II-3; EC=3.4.16.6; AltName: Full=CP-MII.3; Contains: RecName: Full=Serine carboxypeptidase II-3 chain A; Contains: RecName: Full=Serine carboxypeptidase II-3 chain B; Flags: Precursor;	SubName: Full=Uncharacterized protein {ECO:0000313|EMBL:GAY39463.1};	Serine carboxypeptidases (lysosomal cathepsin A)	GO:0004185,serine-type carboxypeptidase activity	Serine carboxypeptidase
gene-LOC110688608	0.79	0.69	0.64	1.67	4.39	2.08	14	12	10	27	74	35	0.339	-1.561	0.00457611	0.0325759	down	NW_018743920.1	8693488	8696345	-	LOC110688608	--	--	uncharacterized protein LOC110688608 [Chenopodium quinoa]	--	SubName: Full=Uncharacterized protein {ECO:0000313|EMBL:KNA21061.1};	--	GO:0016021,integral component of membrane	--
gene-LOC110688675	0.61	1.04	0.46	2.76	2.52	3.32	36	60	24	148	141	185	0.305	-1.715	4.97689e-06	0.000128636	down	NW_018743937.1	36713	44022	-	LOC110688675	--	--	--	--	--	--	--	--
gene-LOC110688683	0.56	0.98	0.91	0	0.03	0	43	73	61	0	2	0	109.939	6.781	1.26278e-09	7.59813e-08	up	NW_018743937.1	465339	471523	+	LOC110688683	--	--	--	--	--	--	--	--
gene-LOC110688684	3.05	3.05	4.09	1.34	3	1.25	95	93	112	38	89	37	2.349	1.232	0.0017719	0.015826	up	NW_018743937.1	543419	547548	-	LOC110688684	--	K13422 transcription factor MYC2 | (RefSeq) transcription factor MYC3-like (A)	transcription factor bHLH61-like [Chenopodium quinoa]	RecName: Full=Transcription factor bHLH93; AltName: Full=Basic helix-loop-helix protein 93; Short=AtbHLH93; Short=bHLH 93; AltName: Full=Transcription factor EN 47; AltName: Full=bHLH transcription factor bHLH093;	SubName: Full=Uncharacterized protein {ECO:0000313|EMBL:KNA15310.1}; Flags: Fragment;	--	GO:0005634,nucleus; GO:0003677,DNA binding; GO:0003700,DNA-binding transcription factor activity; GO:0046983,protein dimerization activity; GO:0045487,gibberellin catabolic process; GO:0007275,multicellular organism development; GO:0010371,regulation of gibberellin biosynthetic process; GO:0006351,transcription, DNA-templated	Helix-loop-helix DNA-binding domain
gene-LOC110688707	0.98	1.54	1.21	0.29	0.4	0.36	97	150	106	26	38	34	4.435	2.149	2.98173e-12	2.90718e-10	up	NW_018743937.1	1830929	1838388	-	LOC110688707	--	K00620 glutamate N-acetyltransferase / amino-acid N-acetyltransferase [EC:2.3.1.35 2.3.1.1] | (RefSeq) arginine biosynthesis bifunctional protein ArgJ, chloroplastic-like (A)	uncharacterized protein LOC110688707 isoform X1 [Chenopodium quinoa]	RecName: Full=Arginine biosynthesis bifunctional protein ArgJ, chloroplastic {ECO:0000255|HAMAP-Rule:MF_03124}; Includes: RecName: Full=Glutamate N-acetyltransferase {ECO:0000255|HAMAP-Rule:MF_03124}; Short=GAT {ECO:0000255|HAMAP-Rule:MF_03124}; EC=2.3.1.35 {ECO:0000255|HAMAP-Rule:MF_03124}; AltName: Full=Ornithine acetyltransferase {ECO:0000255|HAMAP-Rule:MF_03124}; Short=OATase {ECO:0000255|HAM…	RecName: Full=Arginine biosynthesis bifunctional protein ArgJ, chloroplastic {ECO:0000256|HAMAP-Rule:MF_03124}; Includes: RecName: Full=Amino-acid acetyltransferase {ECO:0000256|HAMAP-Rule:MF_03124}; EC=2.3.1.1 {ECO:0000256|HAMAP-Rule:MF_03124}; AltName: Full=N-acetylglutamate synthase {ECO:0000256|HAMAP-Rule:MF_03124}; Short=AGS {ECO:0000256|HAMAP-Rule:MF_03124}; Includes: RecName: Full=Glutamat…	--	GO:0009507,chloroplast; GO:0004042,acetyl-CoA:L-glutamate N-acetyltransferase activity; GO:0004358,glutamate N-acetyltransferase activity; GO:0103045,methione N-acyltransferase activity; GO:0006526,arginine biosynthetic process	--
gene-LOC110688719	12.73	19.41	19.54	9.56	7.26	7.68	312	466	422	214	170	179	2.606	1.382	2.37245e-08	1.10844e-06	up	NW_018743937.1	2447692	2448894	+	LOC110688719	--	K14488 SAUR family protein | (RefSeq) auxin-responsive protein SAUR50-like (A)	auxin-responsive protein SAUR50-like [Chenopodium quinoa]	RecName: Full=Auxin-responsive protein SAUR50 {ECO:0000303|PubMed:12036261}; AltName: Full=Protein SMALL AUXIN UP RNA 50 {ECO:0000303|PubMed:12036261};	SubName: Full=Uncharacterized protein {ECO:0000313|EMBL:KMS95424.1};	--	GO:0009734,auxin-activated signaling pathway; GO:0040008,regulation of growth	Auxin responsive protein
gene-LOC110688738	4.64	6.95	6.12	0	0	0	193	283	224	0	0	0	1558.57	10.606	1.65377e-18	3.58108e-16	up	NW_018743937.1	3574337	3577326	+	LOC110688738	--	--	--	--	--	--	--	--
gene-LOC110688739	15.14	8.57	4.4	46.65	28.59	29.07	422	234	108	1188	761	770	0.349	-1.52	0.00168726	0.0152868	down	NW_018742309.1	6067516	6078176	-	LOC110688739	--	K13717 OTU domain-containing protein 3 [EC:3.4.19.12] | (RefSeq) Ovarian tumour, otubain (A)	OTU domain-containing protein DDB_G0284757-like [Chenopodium quinoa]	--	SubName: Full=Uncharacterized protein {ECO:0000313|EMBL:KNA08189.1};	OTU (ovarian tumor)-like cysteine protease	--	OTU-like cysteine protease
gene-LOC110688740	0.25	0.59	0.93	0.2	0.09	0.08	17	39	55	12	6	5	5.912	2.564	0.000166974	0.00241325	up	NW_018743937.1	3589853	3593975	-	LOC110688740	--	K17604 zinc finger SWIM domain-containing protein 3 | (RefSeq) protein FAR-RED IMPAIRED RESPONSE 1-like (A)	protein FAR1-RELATED SEQUENCE 8-like [Chenopodium quinoa]	RecName: Full=Protein FAR-RED IMPAIRED RESPONSE 1;	SubName: Full=Uncharacterized protein {ECO:0000313|EMBL:ONH89763.1};	--	GO:0005634,nucleus; GO:0003700,DNA-binding transcription factor activity; GO:0008270,zinc ion binding; GO:0010018,far-red light signaling pathway; GO:0042753,positive regulation of circadian rhythm; GO:0045893,positive regulation of transcription, DNA-templated; GO:0010017,red or far-red light signaling pathway; GO:0009585,red, far-red light phototransduction; GO:0010218,response to far red light…	MULE transposase domain
gene-LOC110688741	2.48	2.92	5.37	8.14	12.67	8.3	33	38	63	99	161	105	0.465	-1.103	0.00380399	0.0282999	down	NW_018743937.1	3613861	3614730	+	LOC110688741	--	--	--	--	--	--	--	--
gene-LOC110688752	0.45	0.12	0.35	1.11	1.18	1.25	42	11	29	94	105	110	0.34	-1.557	0.00307439	0.0241981	down	NW_018743937.1	4345596	4355696	-	LOC110688752	--	K21444 poly(rC)-binding protein 3/4 | (RefSeq) KH domain-containing protein HEN4-like (A)	KH domain-containing protein HEN4-like [Chenopodium quinoa]	RecName: Full=RNA-binding KH domain-containing protein RCF3 {ECO:0000305|PubMed:23087326}; AltName: Full=Protein ENHANCED STRESS RESPONSE 1 {ECO:0000303|PubMed:25985302}; AltName: Full=Protein HIGH OSMOTIC STRESS GENE EXPRESSION 5 {ECO:0000303|PubMed:24146632}; AltName: Full=Protein REGULATOR OF CBF GENE EXPRESSION 3 {ECO:0000303|PubMed:23087326}; AltName: Full=Protein SHINY 1 {ECO:0000303|PubMed…	SubName: Full=Uncharacterized protein {ECO:0000313|EMBL:KNA22988.1};	PolyC-binding proteins alphaCP-1 and related KH domain proteins	GO:0010445,nuclear dicing body; GO:0016607,nuclear speck; GO:0070878,primary miRNA binding; GO:0010286,heat acclimation; GO:0009867,jasmonic acid mediated signaling pathway; GO:0006397,mRNA processing; GO:0031053,primary miRNA processing; GO:1900150,regulation of defense response to fungus; GO:0010468,regulation of gene expression; GO:0006970,response to osmotic stress; GO:0008380,RNA splicing	KH domain
gene-LOC110688804	1.11	1.7	0.95	3.13	4.35	2.1	44	66	33	113	164	79	0.499	-1.003	0.00633672	0.0414855	down	NW_018743942.1	171419	180659	-	LOC110688804	--	K13863 solute carrier family 7 (cationic amino acid transporter), member 1 | (RefSeq) uncharacterized protein LOC4333602 (A)	uncharacterized protein LOC110688804 [Chenopodium quinoa]	--	SubName: Full=Uncharacterized protein {ECO:0000313|EMBL:KNA10212.1};	--	GO:0016021,integral component of membrane	NEMP family
gene-LOC110688815	5.78	7.08	5.25	0	0	0	45	54	36	0	0	0	301.175	8.234	9.74895e-11	7.30583e-09	up	NW_018742312.1	148322	149400	+	LOC110688815	--	--	--	--	--	--	--	--
gene-LOC110688859	0.51	0.54	0.14	0.1	0.03	0.08	34	35	8	6	2	5	7.099	2.828	0.000726931	0.00791788	up	NW_018743942.1	2114129	2119287	+	LOC110688859	--	--	--	--	--	--	--	--
gene-LOC110688864	29.1	17.91	19.11	15.43	11.22	13.56	1030	621	596	499	379	456	2.098	1.069	0.00148157	0.0138715	up	NW_018743942.1	2601522	2607147	+	LOC110688864	--	K07024 sucrose-6-phosphatase [EC:3.1.3.24] | (RefSeq) probable sucrose-phosphatase 2 (A)	probable sucrose-phosphatase 2 [Chenopodium quinoa]	RecName: Full=Sucrose-phosphatase 2; Short=NtSPP2; EC=3.1.3.24;	SubName: Full=Uncharacterized protein {ECO:0000313|EMBL:KNA05063.1};	--	GO:0000287,magnesium ion binding; GO:0050307,sucrose-phosphate phosphatase activity; GO:0005986,sucrose biosynthetic process	Sucrose-6F-phosphate phosphohydrolase
gene-LOC110688874	0	0	0	0.65	2.03	0.08	0	0	0	8	26	1	0.021	-5.581	0.00351725	0.0267183	down	NW_018742312.1	155392	157400	-	LOC110688874	--	K20729 protein EPIDERMAL PATTERNING FACTOR 1/2 | (RefSeq) protein EPIDERMAL PATTERNING FACTOR 2-like (A)	protein EPIDERMAL PATTERNING FACTOR 2-like [Chenopodium quinoa]	RecName: Full=Protein EPIDERMAL PATTERNING FACTOR 2 {ECO:0000303|PubMed:19435754}; Contains: RecName: Full=MEPF2 {ECO:0000303|PubMed:22241782}; Flags: Precursor;	SubName: Full=Uncharacterized protein {ECO:0000313|EMBL:KNA16855.1};	--	GO:0005576,extracellular region; GO:0019901,protein kinase binding; GO:0010052,guard cell differentiation; GO:2000122,negative regulation of stomatal complex development; GO:0090626,plant epidermis morphogenesis; GO:0010374,stomatal complex development	Epidermal patterning factor proteins
gene-LOC110688937	2.6	3.99	3.92	0.04	0.09	0.04	64	96	85	1	2	1	75.846	6.245	1.13012e-14	1.57056e-12	up	NW_018743946.1	71090	73504	-	LOC110688937	--	--	--	--	--	--	--	--
gene-LOC110688951	5.46	7.56	5.41	12.5	21.48	13.82	182	247	159	381	684	438	0.488	-1.035	3.20643e-05	0.000622646	down	NW_018743946.1	762003	765641	+	LOC110688951	--	K09422 transcription factor MYB, plant | (RefSeq) myb-related protein 306-like (A)	myb-related protein 306-like [Chenopodium quinoa]	RecName: Full=Transcription factor MYB30 {ECO:0000303|PubMed:10929106}; AltName: Full=Myb-related protein 30 {ECO:0000303|PubMed:10929106}; Short=AtMYB30 {ECO:0000303|PubMed:10929106};	SubName: Full=Uncharacterized protein {ECO:0000313|EMBL:KNA13865.1};	Transcription factor, Myb superfamily	GO:0005634,nucleus; GO:0003700,DNA-binding transcription factor activity; GO:0000981,DNA-binding transcription factor activity, RNA polymerase II-specific; GO:0043565,sequence-specific DNA binding; GO:0001135,RNA polymerase II transcription regulator recruiting activity; GO:0044212,transcription regulatory region DNA binding; GO:0030154,cell differentiation; GO:0009626,plant-type hypersensitive r…	Myb-like DNA-binding domain
gene-LOC110688954	0.73	1.67	1.23	0.03	0.02	0.07	31	69	46	1	1	3	35.334	5.143	2.45029e-10	1.70823e-08	up	NW_018743946.1	969726	994967	+	LOC110688954	--	K13065 shikimate O-hydroxycinnamoyltransferase [EC:2.3.1.133] | (RefSeq) shikimate O-hydroxycinnamoyltransferase-like (A)	shikimate O-hydroxycinnamoyltransferase-like [Chenopodium quinoa]	RecName: Full=Shikimate O-hydroxycinnamoyltransferase; EC=2.3.1.133; AltName: Full=Hydroxycinnamoyl transferase; AltName: Full=Hydroxycinnamoyl-Coenzyme A shikimate/quinate hydroxycinnamoyltransferase;	SubName: Full=Uncharacterized protein {ECO:0000313|EMBL:CCB45012.1};	--	GO:0047172,shikimate O-hydroxycinnamoyltransferase activity	Transferase family
gene-LOC110688956	61.26	51.92	46.37	30.72	26.72	39.92	4070	3378	2714	1864	1695	2520	2.058	1.041	0.000344192	0.00433879	up	NW_018743946.1	1007699	1018369	-	LOC110688956	--	K00703 starch synthase [EC:2.4.1.21] | (RefSeq) granule-bound starch synthase 2, chloroplastic/amyloplastic-like (A)	granule-bound starch synthase 2, chloroplastic/amyloplastic-like [Chenopodium quinoa]	RecName: Full=Granule-bound starch synthase 2, chloroplastic/amyloplastic; EC=2.4.1.21; AltName: Full=Granule-bound starch synthase II; Short=GBSS-II; Short=SS II; Flags: Precursor;	RecName: Full=Starch synthase, chloroplastic/amyloplastic {ECO:0000256|RuleBase:RU361232}; EC=2.4.1.- {ECO:0000256|RuleBase:RU361232};	--	GO:0009501,amyloplast; GO:0009507,chloroplast; GO:0033201,alpha-1,4-glucan synthase activity; GO:0004373,glycogen (starch) synthase activity; GO:0009011,starch synthase activity; GO:0019252,starch biosynthetic process	Starch synthase catalytic domain
gene-LOC110688970	0.71	1.35	1.42	4.17	11.76	3.88	62	115	109	331	975	320	0.225	-2.15	7.75093e-07	2.52566e-05	down	NW_018743946.1	1475006	1486988	+	LOC110688970	--	K06675 structural maintenance of chromosome 4 | (RefSeq) structural maintenance of chromosomes protein 4-like (A)	structural maintenance of chromosomes protein 4-like [Chenopodium quinoa]	RecName: Full=Structural maintenance of chromosomes protein 4; Short=AtSMC4; Short=SMC protein 4; Short=SMC-4; AltName: Full=Chromosome-associated protein C; Short=AtCAP-C;	RecName: Full=Structural maintenance of chromosomes protein {ECO:0000256|PIRNR:PIRNR005719};	Structural maintenance of chromosome protein 4 (chromosome condensation complex Condensin, subunit C)	GO:0005694,chromosome; GO:0005634,nucleus; GO:0005524,ATP binding; GO:0051301,cell division; GO:0009793,embryo development ending in seed dormancy; GO:0051321,meiotic cell cycle; GO:0007076,mitotic chromosome condensation; GO:0000070,mitotic sister chromatid segregation	RecF/RecN/SMC N terminal domain
gene-LOC110688981	0.7	0.69	3.58	7.32	10.36	7.04	27	26	122	259	383	259	0.251	-1.993	0.000861446	0.00903027	down	NW_018743946.1	2194785	2198365	+	LOC110688981	--	--	--	--	--	--	--	--
gene-LOC110688983	0.24	0.28	0.27	12.39	9.43	12.42	15	17	15	703	559	733	0.029	-5.119	1.55329e-51	6.42803e-48	down	NW_018743946.1	2260759	2270402	+	LOC110688983	--	--	--	--	--	--	--	--
gene-LOC110688992	0	0.04	0	0.2	0.19	0.42	0	2	0	9	9	20	0.062	-4.022	0.00495284	0.034608	down	NW_018743946.1	2715553	2720792	-	LOC110688992	--	K14400 pre-mRNA cleavage complex 2 protein Pcf11 | (RefSeq) LOW QUALITY PROTEIN: uncharacterized protein LOC111982967 (A)	serine/threonine-protein phosphatase 7 long form homolog [Chenopodium quinoa]	RecName: Full=Serine/threonine-protein phosphatase 7 long form homolog; EC=3.1.3.16; AltName: Full=Protein MAIN-LIKE 3 {ECO:0000303|PubMed:24635680};	SubName: Full=Uncharacterized protein {ECO:0000313|EMBL:CAN81676.1};	--	GO:0005634,nucleus; GO:0046872,metal ion binding; GO:0004721,phosphoprotein phosphatase activity	Plant mobile domain
gene-LOC110689061	0	0	0	0.44	0.5	0.31	0	0	0	11	13	8	0.022	-5.535	0.000418288	0.00508624	down	NW_018743946.1	3249469	3250969	+	LOC110689061	--	--	uncharacterized protein LOC110689061 [Chenopodium quinoa]	--	SubName: Full=Uncharacterized protein {ECO:0000313|EMBL:KOM55435.1};	--	--	--
gene-LOC110689085	0.53	0	1.81	0	0	0	7	0	21	0	0	0	66.532	6.056	0.00602532	0.0399964	up	NW_018742329.1	496045	498495	+	LOC110689085	--	--	--	--	--	--	--	--
gene-LOC110689105	0	0	0	0.55	0.98	0.98	0	0	0	8	15	15	0.018	-5.786	0.00016192	0.00236405	down	NW_018742329.1	2718431	2719516	-	LOC110689105	--	--	--	--	--	--	--	--
gene-LOC110689144	0.71	0.91	1.97	3.75	9.38	3.84	16	20	39	77	201	82	0.27	-1.889	0.000288102	0.00378763	down	NW_018743955.1	822912	825513	+	LOC110689144	--	K09286 EREBP-like factor | (RefSeq) ethylene-responsive transcription factor RAP2-3-like (A)	ethylene-responsive transcription factor RAP2-3-like [Chenopodium quinoa]	RecName: Full=Ethylene-responsive transcription factor RAP2-3; AltName: Full=Cadmium-induced protein AS30; AltName: Full=Ethylene response factor 72; Short=ERF72; AltName: Full=Ethylene-responsive element binding protein; Short=AtEBP; AltName: Full=Protein RELATED TO APETALA2 3; Short=Related to AP2 3;	SubName: Full=Uncharacterized protein {ECO:0000313|EMBL:KMS95596.1};	--	GO:0005737,cytoplasm; GO:0005634,nucleus; GO:0005886,plasma membrane; GO:0003677,DNA binding; GO:0003700,DNA-binding transcription factor activity; GO:0043565,sequence-specific DNA binding; GO:0008219,cell death; GO:0009873,ethylene-activated signaling pathway; GO:0010286,heat acclimation; GO:0045893,positive regulation of transcription, DNA-templated; GO:0009735,response to cytokinin; GO:0009723…	AP2 domain
gene-LOC110689157	0.33	0.76	0.49	1.36	4.03	1.33	34	77	45	129	401	132	0.298	-1.747	0.000255301	0.00343398	down	NW_018743955.1	1401768	1414589	-	LOC110689157	--	--	--	--	--	--	--	--
gene-LOC110689158	0.63	0.66	0.77	2.57	2.75	2.44	39	40	42	145	162	143	0.334	-1.581	7.30738e-09	3.73851e-07	down	NW_018743955.1	1427546	1430783	+	LOC110689158	--	K01183 chitinase [EC:3.2.1.14] | (RefSeq) endochitinase A (A)	uncharacterized protein LOC110689158 isoform X1 [Chenopodium quinoa]	--	SubName: Full=Uncharacterized protein {ECO:0000313|EMBL:CAN80919.1};	FOG: Transposon-encoded proteins with TYA, reverse transcriptase, integrase domains in various combinations	GO:0003676,nucleic acid binding; GO:0015074,DNA integration	gag-polypeptide of LTR copia-type
gene-LOC110689160	0.07	0.11	0.09	0.45	0.36	0.53	5	8	6	30	25	37	0.251	-1.994	0.000918353	0.00948901	down	NW_018743955.1	1535556	1539803	-	LOC110689160	--	--	uncharacterized protein LOC110689160 [Chenopodium quinoa]	--	SubName: Full=Uncharacterized protein {ECO:0000313|EMBL:KNA05072.1}; Flags: Fragment;	AAA+-type ATPase	GO:0005524,ATP binding	--
gene-LOC110689182	2.08	9.33	11.38	34.41	116.99	17.55	26	114	125	392	1393	208	0.172	-2.538	0.000148077	0.00221048	down	NW_018743955.1	2685708	2686319	+	LOC110689182	--	K11254 histone H4 | (RefSeq) histone H4 (A)	hypothetical protein SETIT_032292mg, partial [Setaria italica]	RecName: Full=Histone H4;	RecName: Full=Histone H4 {ECO:0000256|RuleBase:RU000528}; Flags: Fragment;	Histone H4	GO:0009507,chloroplast; GO:0005829,cytosol; GO:0000788,nuclear nucleosome; GO:0005730,nucleolus; GO:0005886,plasma membrane; GO:0009506,plasmodesma; GO:0009579,thylakoid; GO:0005774,vacuolar membrane; GO:0003677,DNA binding; GO:0042393,histone binding; GO:0046982,protein heterodimerization activity; GO:0006334,nucleosome assembly; GO:0009414,response to water deprivation	Centromere kinetochore component CENP-T histone fold
gene-LOC110689184	2.74	0.11	4.05	0.09	0.09	0.02	129	5	168	4	4	1	44.646	5.48	3.08538e-07	1.12222e-05	up	NW_018743955.1	2891548	2894002	+	LOC110689184	--	--	--	--	--	--	--	--
gene-LOC110689194	6.31	6.23	6.34	2.6	2.22	3.75	122	118	108	46	41	69	2.74	1.454	3.45322e-05	0.000662623	up	NW_018743955.1	3398439	3399387	+	LOC110689194	--	K01870 isoleucyl-tRNA synthetase [EC:6.1.1.5] | (RefSeq) isoleucine--tRNA ligase, chloroplastic/mitochondrial-like (A)	dirigent protein 23-like [Chenopodium quinoa]	RecName: Full=Dirigent protein 23; Short=AtDIR23; Flags: Precursor;	RecName: Full=Dirigent protein {ECO:0000256|RuleBase:RU363099};	--	GO:0048046,apoplast; GO:0016853,isomerase activity	Dirigent-like protein
gene-LOC110689195	7.21	4.91	6.79	1.4	1.03	2.53	147	98	122	26	20	49	4.77	2.254	1.52823e-06	4.53898e-05	up	NW_018743955.1	3401605	3402605	+	LOC110689195	--	--	--	--	--	--	--	--
gene-LOC110689196	28.55	26.56	37	11.83	7.93	22.57	494	450	564	187	131	371	2.666	1.415	0.00112107	0.011145	up	NW_018743955.1	3427441	3428289	+	LOC110689196	--	K01870 isoleucyl-tRNA synthetase [EC:6.1.1.5] | (RefSeq) hypothetical protein (A)	dirigent protein 21-like [Chenopodium quinoa]	RecName: Full=Dirigent protein 21; Short=AtDIR21; Flags: Precursor;	RecName: Full=Dirigent protein {ECO:0000256|RuleBase:RU363099};	--	GO:0005618,cell wall; GO:0005576,extracellular region; GO:0016853,isomerase activity	Dirigent-like protein
gene-LOC110689220	46.3	39.37	46.27	23.75	20.09	26.75	920	766	810	431	381	505	2.347	1.231	2.39683e-06	6.79893e-05	up	NW_018743955.1	4750544	4758557	-	LOC110689220	--	K03671 thioredoxin 1 | (RefSeq) Thioredoxin H-type (A)	thioredoxin-like 3-1, chloroplastic [Chenopodium quinoa]	RecName: Full=Thioredoxin-like 3-1, chloroplastic; AltName: Full=Thioredoxin WCRKC-1; Flags: Precursor;	SubName: Full=Uncharacterized protein {ECO:0000313|EMBL:KNA22536.1};	Thioredoxin	GO:0009570,chloroplast stroma; GO:0016671,oxidoreductase activity, acting on a sulfur group of donors, disulfide as acceptor; GO:0015035,protein disulfide oxidoreductase activity; GO:0047134,protein-disulfide reductase activity; GO:0004791,thioredoxin-disulfide reductase activity; GO:0045454,cell redox homeostasis; GO:0034599,cellular response to oxidative stress; GO:0006662,glycerol ether metabo…	Thioredoxin
gene-LOC110689247	0.15	0.12	0.17	0.78	0.91	0.66	9	7	9	42	51	37	0.241	-2.052	4.46386e-05	0.000823867	down	NW_018743955.1	5928579	5932199	+	LOC110689247	--	--	--	--	--	--	--	--
gene-LOC110689264	3.41	5.22	5.58	2.88	2.47	2.28	88	132	127	68	61	56	2.308	1.207	4.31191e-05	0.000800984	up	NW_018743955.1	6256279	6261408	-	LOC110689264	--	K05955 protein farnesyltransferase/geranylgeranyltransferase type-1 subunit alpha [EC:2.5.1.58 2.5.1.59] | (RefSeq) protein farnesyltransferase/geranylgeranyltransferase type-1 subunit alpha-like (A)	protein farnesyltransferase/geranylgeranyltransferase type-1 subunit alpha-like [Chenopodium quinoa]	RecName: Full=Protein farnesyltransferase/geranylgeranyltransferase type-1 subunit alpha; EC=2.5.1.58; EC=2.5.1.59; AltName: Full=CAAX farnesyltransferase subunit alpha; AltName: Full=FTase-alpha; AltName: Full=Ras proteins prenyltransferase subunit alpha; AltName: Full=Type I protein geranyl-geranyltransferase subunit alpha; Short=GGTase-I-alpha;	SubName: Full=Uncharacterized protein {ECO:0000313|EMBL:KNA16504.1};	Protein farnesyltransferase, alpha subunit/protein geranylgeranyltransferase type I, alpha subunit	GO:0005953,CAAX-protein geranylgeranyltransferase complex; GO:0005965,protein farnesyltransferase complex; GO:0004662,CAAX-protein geranylgeranyltransferase activity; GO:0004660,protein farnesyltransferase activity; GO:0004661,protein geranylgeranyltransferase activity; GO:0018343,protein farnesylation; GO:0018344,protein geranylgeranylation	Protein prenyltransferase alpha subunit repeat
gene-LOC110689278	0.92	1.35	1.79	3.55	4.41	3.27	36	52	62	127	165	122	0.452	-1.145	0.000204826	0.00286454	down	NW_018743955.1	6516233	6523783	+	LOC110689278	--	--	--	--	--	--	--	--
gene-LOC110689291	1.01	2.14	2.29	3.89	8.59	3.48	75	156	150	265	611	246	0.43	-1.217	0.00217297	0.0185115	down	NW_018743955.1	6632561	6660332	+	LOC110689291	--	--	structural maintenance of chromosomes protein 6A-like [Chenopodium quinoa]	RecName: Full=Structural maintenance of chromosomes protein 6A;	SubName: Full=Uncharacterized protein {ECO:0000313|EMBL:KNA17825.1};	DNA repair protein RAD18 (SMC family protein)	GO:0005634,nucleus; GO:0030915,Smc5-Smc6 complex; GO:0005524,ATP binding; GO:0000724,double-strand break repair via homologous recombination; GO:0010165,response to X-ray; GO:0007062,sister chromatid cohesion	RecF/RecN/SMC N terminal domain
gene-LOC110689304	0.79	1.32	1.34	2.98	4.06	2.87	22	36	33	76	108	76	0.435	-1.201	0.000405319	0.00494664	down	NW_018743955.1	6747909	6752276	+	LOC110689304	--	K01444 N4-(beta-N-acetylglucosaminyl)-L-asparaginase [EC:3.5.1.26] | (RefSeq) probable isoaspartyl peptidase/L-asparaginase 3 isoform X1 (A)	probable isoaspartyl peptidase/L-asparaginase 3 isoform X1 [Chenopodium quinoa]	RecName: Full=Probable isoaspartyl peptidase/L-asparaginase 3; EC=3.4.19.5; AltName: Full=L-asparagine amidohydrolase 3; Contains: RecName: Full=Isoaspartyl peptidase/L-asparaginase 3 subunit alpha; Contains: RecName: Full=Isoaspartyl peptidase/L-asparaginase 3 subunit beta; Flags: Precursor;	SubName: Full=Asparaginase_2 domain-containing protein {ECO:0000313|EMBL:GAV75705.1};	Asparaginase	GO:0008798,beta-aspartyl-peptidase activity	Asparaginase
gene-LOC110689310	1.37	1.9	2.32	1.25	0.96	0.81	78	106	116	65	52	44	2.3	1.202	0.000310977	0.00401329	up	NW_018743955.1	6808204	6812461	-	LOC110689310	--	K13416 brassinosteroid insensitive 1-associated receptor kinase 1 [EC:2.7.10.1 2.7.11.1] | (RefSeq) BRASSINOSTEROID INSENSITIVE 1-associated receptor kinase 1-like (A)	putative kinase-like protein TMKL1 [Chenopodium quinoa]	RecName: Full=Putative kinase-like protein TMKL1; Flags: Precursor;	SubName: Full=Uncharacterized protein {ECO:0000313|EMBL:KMS98918.1};	Serine/threonine protein kinase	GO:0016021,integral component of membrane; GO:0005886,plasma membrane; GO:0009506,plasmodesma; GO:0005524,ATP binding; GO:0004672,protein kinase activity	Protein tyrosine kinase
gene-LOC110689325	14.01	10.65	5.64	3.72	3.91	4.13	375	279	133	91	100	105	3.3	1.722	2.04107e-05	0.000426598	up	NW_018743955.1	6960885	6962197	+	LOC110689325	--	K20604 mitogen-activated protein kinase kinase 9 [EC:2.7.12.2] | (RefSeq) mitogen-activated protein kinase kinase 9-like (A)	mitogen-activated protein kinase kinase 9-like [Chenopodium quinoa]	RecName: Full=Mitogen-activated protein kinase kinase 9; Short=AtMKK9; Short=MAP kinase kinase 9; EC=2.7.12.2;	SubName: Full=Uncharacterized protein {ECO:0000313|EMBL:KNA17854.1};	Mitogen-activated protein kinase kinase (MAP2K)	GO:0005737,cytoplasm; GO:0005634,nucleus; GO:0005524,ATP binding; GO:0004708,MAP kinase kinase activity; GO:0030295,protein kinase activator activity; GO:0004674,protein serine/threonine kinase activity; GO:0010120,camalexin biosynthetic process; GO:0009693,ethylene biosynthetic process; GO:0009873,ethylene-activated signaling pathway; GO:0010150,leaf senescence; GO:0045893,positive regulation of…	Protein kinase domain
gene-LOC110689334	3.9	1.43	2.35	0.57	1.12	0.51	186	67	99	25	51	23	4.661	2.221	2.31382e-05	0.000473522	up	NW_018743955.1	7030691	7034444	+	LOC110689334	--	--	--	--	--	--	--	--
gene-LOC110689335	0	0	0	0.12	0.37	0.1	0	0	0	6	19	5	0.024	-5.389	0.00158332	0.0145677	down	NW_018743955.1	7071434	7074874	+	LOC110689335	--	K10999 cellulose synthase A [EC:2.4.1.12] | (RefSeq) cellulose synthase A catalytic subunit 7 [UDP-forming]-like (A)	cellulose synthase-like protein E6 [Chenopodium quinoa]	RecName: Full=Cellulose synthase-like protein E6; EC=2.4.1.-; AltName: Full=OsCslE6;	SubName: Full=Uncharacterized protein {ECO:0000313|EMBL:KNA17847.1};	--	GO:0005794,Golgi apparatus; GO:0000139,Golgi membrane; GO:0016021,integral component of membrane; GO:0005886,plasma membrane; GO:0016760,cellulose synthase (UDP-forming) activity; GO:0016759,cellulose synthase activity; GO:0071555,cell wall organization; GO:0030244,cellulose biosynthetic process; GO:0009833,plant-type primary cell wall biogenesis	Cellulose synthase
gene-LOC110689357	2.88	2.83	1.91	7.11	10.25	6.62	140	135	82	316	476	306	0.407	-1.295	4.68342e-06	0.000121726	down	NW_018743955.1	7333206	7336459	+	LOC110689357	--	K13783 MFS transporter, OPA family, solute carrier family 37 (glycerol-3-phosphate transporter), member 1/2 | (RefSeq) putative glycerol-3-phosphate transporter 1 (A)	putative glycerol-3-phosphate transporter 1 [Chenopodium quinoa]	RecName: Full=Putative glycerol-3-phosphate transporter 1; Short=G-3-P transporter 1; AltName: Full=Glycerol-3-phosphate permease 1; Short=AtG3Pp1; Short=G-3-P permease 1; AltName: Full=Protein PHOSPHATE STARVATION-INDUCED GENE 3; Short=AtPS3;	SubName: Full=Uncharacterized protein {ECO:0000313|EMBL:KMS98872.1};	Permease of the major facilitator superfamily	GO:0016021,integral component of membrane; GO:0022857,transmembrane transporter activity; GO:0008643,carbohydrate transport; GO:0055062,phosphate ion homeostasis	Major Facilitator Superfamily
gene-LOC110689372	1.45	5	1.64	8.77	14	8.03	76	257	76	420	701	400	0.323	-1.629	0.000224746	0.00309037	down	NW_018743955.1	7511202	7518399	+	LOC110689372	--	K01193 beta-fructofuranosidase [EC:3.2.1.26] | (RefSeq) acid beta-fructofuranosidase-like (A)	acid beta-fructofuranosidase-like [Chenopodium quinoa]	RecName: Full=Acid beta-fructofuranosidase; EC=3.2.1.26; AltName: Full=Acid invertase; Short=AI; AltName: Full=Acid sucrose hydrolase; AltName: Full=Vacuolar invertase; Flags: Precursor;	SubName: Full=Uncharacterized protein {ECO:0000313|EMBL:KNA17802.1};	Beta-fructofuranosidase (invertase)	GO:0016021,integral component of membrane; GO:0005775,vacuolar lumen; GO:0004575,sucrose alpha-glucosidase activity; GO:0005985,sucrose metabolic process	Glycosyl hydrolases family 32 N-terminal domain
gene-LOC110689403	1.09	2.11	2.03	3.39	7.89	3.33	94	178	154	266	648	272	0.455	-1.137	0.00235072	0.0196262	down	NW_018743955.1	7838130	7843046	-	LOC110689403	--	--	KIN14B-interacting protein At4g14310-like [Chenopodium quinoa]	RecName: Full=KIN14B-interacting protein At4g14310;	SubName: Full=Uncharacterized protein {ECO:0000313|EMBL:KNA24115.1};	--	GO:0005618,cell wall; GO:0005737,cytoplasm; GO:0007049,cell cycle; GO:0051301,cell division	--
gene-LOC110689406	0.25	0.98	0.54	2.49	6.51	1.73	14	55	27	130	355	94	0.207	-2.272	6.45428e-05	0.00111705	down	NW_018743955.1	7873534	7877564	+	LOC110689406	--	K10398 kinesin family member 11 | (RefSeq) kinesin-like protein KIN-10A (A)	kinesin-like protein KIN-10A [Chenopodium quinoa]	RecName: Full=Kinesin-like protein KIN-10A {ECO:0000305}; AltName: Full=Phragmoplast-associated kinesin-related protein 2 {ECO:0000303|PubMed:11701879}; Short=AtPAKRP2 {ECO:0000303|PubMed:11701879};	SubName: Full=Uncharacterized protein {ECO:0000313|EMBL:KNA24113.1};	Kinesin-like protein	GO:0005737,cytoplasm; GO:0005871,kinesin complex; GO:0005874,microtubule; GO:0009524,phragmoplast; GO:0005524,ATP binding; GO:0008574,ATP-dependent microtubule motor activity, plus-end-directed; GO:0008017,microtubule binding; GO:0007018,microtubule-based movement; GO:0047496,vesicle transport along microtubule	Kinesin motor domain
gene-LOC110689423	0.07	0.1	0.06	0.44	1.12	0.24	3	4	2	16	43	9	0.17	-2.558	0.00411233	0.0299909	down	NW_018743955.1	8082465	8086301	-	LOC110689423	--	K13413 mitogen-activated protein kinase kinase 4/5 [EC:2.7.12.2] | (RefSeq) mitogen-activated protein kinase kinase 5-like (A)	protein LIGHT-DEPENDENT SHORT HYPOCOTYLS 4-like [Chenopodium quinoa]	RecName: Full=Protein LIGHT-DEPENDENT SHORT HYPOCOTYLS 4; AltName: Full=Protein ORGAN BOUNDARY 4;	SubName: Full=Uncharacterized protein {ECO:0000313|EMBL:KNA13491.1};	--	GO:0005634,nucleus; GO:0003677,DNA binding; GO:0009299,mRNA transcription; GO:0007275,multicellular organism development; GO:0090698,post-embryonic plant morphogenesis; GO:0006355,regulation of transcription, DNA-templated; GO:0009416,response to light stimulus	Protein of unknown function (DUF640)
gene-LOC110689424	0.55	1.17	0.96	3.11	5.38	3.26	13	27	20	67	121	73	0.286	-1.805	9.10974e-06	0.000215014	down	NW_018743955.1	8099668	8104330	-	LOC110689424	--	K09648 mitochondrial inner membrane protease subunit 2 [EC:3.4.21.-] | (RefSeq) mitochondrial inner membrane protease subunit 2 (A)	mitochondrial inner membrane protease subunit 1-like [Chenopodium quinoa]	--	SubName: Full=Uncharacterized protein {ECO:0000313|EMBL:KNA21077.1};	Mitochondrial inner membrane protease, subunit IMP2	--	Peptidase S24-like
gene-LOC110689431	209.29	219.09	210.2	125.94	143.32	126.23	5886	6034	5208	3235	3848	3373	2.038	1.027	2.62198e-12	2.58349e-10	up	NW_018743955.1	8179843	8183315	+	LOC110689431	--	K00025 malate dehydrogenase [EC:1.1.1.37] | (RefSeq) malate dehydrogenase, cytoplasmic (A)	malate dehydrogenase, cytoplasmic [Chenopodium quinoa]	RecName: Full=Malate dehydrogenase, cytoplasmic; EC=1.1.1.37;	RecName: Full=Malate dehydrogenase {ECO:0000256|RuleBase:RU003405}; EC=1.1.1.37 {ECO:0000256|RuleBase:RU003405};	Malate dehydrogenase	GO:0005737,cytoplasm; GO:0030060,L-malate dehydrogenase activity; GO:0005975,carbohydrate metabolic process; GO:0006108,malate metabolic process; GO:0006099,tricarboxylic acid cycle	lactate/malate dehydrogenase, alpha/beta C-terminal domain
gene-LOC110689495	0	0	0	0.85	0.82	0.16	0	0	0	10	10	2	0.032	-4.982	0.00725291	0.04577	down	NW_018743955.1	6265125	6265754	+	LOC110689495	--	K11253 histone H3 | (RefSeq) uncharacterized protein LOC110788621 (A)	uncharacterized protein LOC110689495 [Chenopodium quinoa]	--	SubName: Full=Uncharacterized protein {ECO:0000313|EMBL:CDP10229.1};	--	GO:0003676,nucleic acid binding; GO:0008270,zinc ion binding	SWIM zinc finger
gene-LOC110689606	0	0.02	0	0.77	1	0.96	0	1	0	31	42	40	0.012	-6.401	7.87579e-07	2.56411e-05	down	NW_018743975.1	82164	85929	-	LOC110689606	--	K02952 small subunit ribosomal protein S13 | (RefSeq) 30S ribosomal protein S13, chloroplastic-like (A)	uncharacterized protein LOC110689606 isoform X1 [Chenopodium quinoa]	--	SubName: Full=Uncharacterized protein {ECO:0000313|EMBL:KNA05334.1};	--	--	Alpha/beta hydrolase family
gene-LOC110689631	1.1	1.39	0.98	3.81	7.35	3.44	149	184	117	472	952	443	0.304	-1.716	2.41227e-08	1.12447e-06	down	NW_018743975.1	372945	395018	-	LOC110689631	--	K02324 DNA polymerase epsilon subunit 1 [EC:2.7.7.7] | (RefSeq) DNA polymerase epsilon catalytic subunit A-like (A)	DNA polymerase epsilon catalytic subunit A-like [Chenopodium quinoa]	RecName: Full=DNA polymerase epsilon catalytic subunit A; EC=2.7.7.7; AltName: Full=DNA polymerase 2 a; Short=AtPOL2a; AltName: Full=DNA polymerase II subunit a; AltName: Full=Protein ABA OVERLY SENSITIVE a; AltName: Full=Protein EARLY IN SHORT DAYS 7; AltName: Full=Protein EMBRYO DEFECTIVE 142; AltName: Full=Protein EMBRYO DEFECTIVE 2284; AltName: Full=Protein EMBRYO DEFECTIVE 529; AltName: Full…	SubName: Full=Uncharacterized protein {ECO:0000313|EMBL:KNA12254.1};	DNA polymerase epsilon, catalytic subunit A	GO:0048046,apoplast; GO:0008622,epsilon DNA polymerase complex; GO:0051539,4 iron, 4 sulfur cluster binding; GO:0003677,DNA binding; GO:0003887,DNA-directed DNA polymerase activity; GO:0000166,nucleotide binding; GO:0008310,single-stranded DNA 3'-5' exodeoxyribonuclease activity; GO:0008270,zinc ion binding; GO:0006287,base-excision repair, gap-filling; GO:0045004,DNA replication proofreading; GO…	Domain of unknown function (DUF1744)
gene-LOC110689649	3.72	9.79	7.35	25.99	33.27	16.6	140	361	244	894	1196	594	0.341	-1.551	5.51522e-06	0.000140214	down	NW_018743975.1	304224	309331	-	LOC110689649	--	--	--	--	--	--	--	--
gene-LOC110689653	2.75	0	4.65	0.02	0.04	0.05	128	0	191	1	2	2	84.581	6.402	3.50807e-06	9.48172e-05	up	NW_018743977.1	142523	146339	-	LOC110689653	--	--	--	--	--	--	--	--
gene-LOC110689655	0.41	0.54	0.34	0.04	0.16	0.08	11	14	8	1	4	2	5.899	2.56	0.00594614	0.0396089	up	NW_018743977.1	375245	378012	+	LOC110689655	--	--	uncharacterized protein LOC110689655 [Chenopodium quinoa]	--	--	--	--	--
gene-LOC110689678	6.78	5.15	3.41	25.26	20.47	18.28	480	357	213	1634	1384	1230	0.307	-1.705	4.06926e-07	1.43795e-05	down	NW_018743977.1	866638	877591	-	LOC110689678	--	K13430 serine/threonine-protein kinase PBS1 [EC:2.7.11.1] | (RefSeq) serine/threonine-protein kinase PBS1-like (A)	receptor-like serine/threonine-protein kinase ALE2 [Chenopodium quinoa]	RecName: Full=Receptor-like serine/threonine-protein kinase ALE2; EC=2.7.11.1; AltName: Full=Protein ABNORMAL LEAF SHAPE 2; Flags: Precursor;	SubName: Full=Uncharacterized protein {ECO:0000313|EMBL:KNA15171.1};	Serine/threonine protein kinase	GO:0016021,integral component of membrane; GO:0005886,plasma membrane; GO:0005524,ATP binding; GO:0016301,kinase activity; GO:0004674,protein serine/threonine kinase activity; GO:0004675,transmembrane receptor protein serine/threonine kinase activity; GO:0030154,cell differentiation; GO:0007166,cell surface receptor signaling pathway; GO:0042335,cuticle development; GO:1905393,plant organ formati…	Protein tyrosine kinase
gene-LOC110689681	0.93	2.44	2.89	5.71	13.63	3.43	35	90	96	197	491	123	0.349	-1.52	0.00377512	0.0281377	down	NW_018743977.1	926564	936833	+	LOC110689681	--	K11303 histone acetyltransferase 1 [EC:2.3.1.48] | (RefSeq) histone acetyltransferase type B catalytic subunit-like (A)	histone acetyltransferase type B catalytic subunit-like [Chenopodium quinoa]	RecName: Full=Histone acetyltransferase type B catalytic subunit; Short=HAT B; EC=2.3.1.48 {ECO:0000250|UniProtKB:O14929};	SubName: Full=Uncharacterized protein {ECO:0000313|EMBL:KNA15169.1};	Histone acetyltransferase type b catalytic subunit	GO:0000781,chromosome, telomeric region; GO:0005829,cytosol; GO:0000790,nuclear chromatin; GO:0005634,nucleus; GO:0010485,H4 histone acetyltransferase activity; GO:0042393,histone binding; GO:0006348,chromatin silencing at telomere	Histone acetyl transferase HAT1 N-terminus
gene-LOC110689694	6.42	6.36	5.5	2.33	1.47	2.42	307	298	232	102	67	110	3.661	1.872	6.97984e-09	3.58571e-07	up	NW_018743977.1	1135635	1139127	+	LOC110689694	--	K13429 chitin elicitor receptor kinase 1 | (RefSeq) lysM domain receptor-like kinase 3 (A)	serine/threonine receptor-like kinase NFP [Chenopodium quinoa]	RecName: Full=Serine/threonine receptor-like kinase NFP {ECO:0000303|PubMed:16723404}; Short=RLK NFP {ECO:0000303|PubMed:16723404}; AltName: Full=Nod factor perception protein {ECO:0000303|PubMed:12753588}; EC=2.7.10.- {ECO:0000255|PROSITE-ProRule:PRU00159}; AltName: Full=Nod-factor receptor 5; Flags: Precursor;	SubName: Full=Uncharacterized protein {ECO:0000313|EMBL:KNA21988.1};	--	GO:0016021,integral component of membrane; GO:0005886,plasma membrane; GO:0005775,vacuolar lumen; GO:0005524,ATP binding; GO:0004713,protein tyrosine kinase activity; GO:0006952,defense response; GO:0009877,nodulation; GO:1902290,positive regulation of defense response to oomycetes; GO:0006486,protein glycosylation; GO:1900150,regulation of defense response to fungus; GO:0002237,response to molec…	Protein kinase domain
gene-LOC110689698	0	0	0	0.39	0.51	1.53	0	0	0	11	15	45	0.009	-6.731	9.87186e-06	0.000230086	down	NW_018743977.1	1204909	1221520	-	LOC110689698	--	--	--	--	--	--	--	--
gene-LOC110689709	0.63	0.64	0.5	1.46	1.45	1.7	36	36	25	76	79	92	0.484	-1.048	0.00281132	0.0225809	down	NW_018743977.1	1355274	1358071	+	LOC110689709	--	K13415 protein brassinosteroid insensitive 1 [EC:2.7.10.1 2.7.11.1] | (RefSeq) systemin receptor SR160 (A)	probable inactive receptor kinase At1g27190 [Chenopodium quinoa]	RecName: Full=Inactive LRR receptor-like serine/threonine-protein kinase BIR2 {ECO:0000305}; AltName: Full=Protein BAK1-INTERACTING RECEPTOR-LIKE KINASE 2 {ECO:0000303|PubMed:24388849}; Flags: Precursor;	SubName: Full=Uncharacterized protein {ECO:0000313|EMBL:KNA18134.1};	--	GO:0009507,chloroplast; GO:0016021,integral component of membrane; GO:0016020,membrane; GO:0005886,plasma membrane; GO:0000166,nucleotide binding; GO:0006952,defense response; GO:1900425,negative regulation of defense response to bacterium; GO:0006468,protein phosphorylation; GO:1900150,regulation of defense response to fungus	Protein tyrosine kinase
gene-LOC110689711	15.46	13.94	12.06	5.64	5.74	8.95	429	379	295	143	152	236	2.556	1.354	2.67326e-05	0.000535011	up	NW_018743977.1	1373107	1374632	+	LOC110689711	--	--	uncharacterized protein LOC110689711 [Chenopodium quinoa]	--	SubName: Full=Uncharacterized protein {ECO:0000313|EMBL:KNA18133.1};	--	GO:0006396,RNA processing	Tetratricopeptide repeat
gene-LOC110689727	0.49	1.16	1.02	3.76	6.71	2.14	29	67	53	203	378	120	0.267	-1.903	1.80859e-05	0.000385539	down	NW_018743977.1	1736025	1739529	-	LOC110689727	--	--	uncharacterized protein LOC110689727 isoform X1 [Chenopodium quinoa]	RecName: Full=Protein JASON {ECO:0000305};	SubName: Full=Uncharacterized protein {ECO:0000313|EMBL:KNA23472.1};	--	GO:0007142,male meiosis II; GO:0009556,microsporogenesis; GO:0006355,regulation of transcription, DNA-templated	--
gene-LOC110689728	0.38	1.81	1.6	6.33	13.77	5.45	20	94	75	307	698	275	0.184	-2.441	2.0335e-06	5.85752e-05	down	NW_018743977.1	1747076	1753174	+	LOC110689728	--	K10683 BRCA1-associated RING domain protein 1 | (RefSeq) BRCA1-associated RING domain protein 1-like (A)	BRCA1-associated RING domain protein 1-like [Chenopodium quinoa]	RecName: Full=BRCA1-associated RING domain protein 1 {ECO:0000303|PubMed:18591352}; Short=AtBARD1 {ECO:0000303|PubMed:18591352}; AltName: Full=Protein REPRESSOR OF WUSCHEL 1 {ECO:0000303|PubMed:19704708};	SubName: Full=Uncharacterized protein {ECO:0000313|EMBL:KNA23473.1};	Transcriptional regulator BRCA1	GO:0070531,BRCA1-A complex; GO:0031436,BRCA1-BARD1 complex; GO:0005634,nucleus; GO:0005886,plasma membrane; GO:0003677,DNA binding; GO:0046872,metal ion binding; GO:0004842,ubiquitin-protein transferase activity; GO:0006281,DNA repair; GO:0000724,double-strand break repair via homologous recombination; GO:0080182,histone H3-K4 trimethylation; GO:0048366,leaf development; GO:0010078,maintenance of…	BRCT domain, a BRCA1 C-terminus domain
gene-LOC110689749	0.77	1.87	1.17	4.98	6.07	4.61	46	110	62	273	348	263	0.301	-1.734	1.06015e-08	5.25918e-07	down	NW_018743977.1	2032394	2039780	-	LOC110689749	--	K17756 long-chain-alcohol oxidase [EC:1.1.3.20] | (RefSeq) long-chain-alcohol oxidase FAO2-like (A)	long-chain-alcohol oxidase FAO2-like [Chenopodium quinoa]	RecName: Full=Long-chain-alcohol oxidase FAO2; EC=1.1.3.20; AltName: Full=Long-chain fatty alcohol oxidase 2;	RecName: Full=Long-chain-alcohol oxidase {ECO:0000256|PIRNR:PIRNR028937}; EC=1.1.3.20 {ECO:0000256|PIRNR:PIRNR028937};	--	GO:0016021,integral component of membrane; GO:0050660,flavin adenine dinucleotide binding; GO:0046577,long-chain-alcohol oxidase activity	GMC oxidoreductase
gene-LOC110689758	0.95	0	0.54	0	0	0	20	0	10	0	0	0	71.863	6.167	0.00423833	0.0307413	up	NW_018743977.1	2271502	2272626	+	LOC110689758	--	--	uncharacterized protein LOC110689758 [Chenopodium quinoa]	--	SubName: Full=Uncharacterized protein {ECO:0000313|EMBL:KNA08123.1};	--	GO:0003676,nucleic acid binding; GO:0008270,zinc ion binding	Zinc knuckle
gene-LOC110689768	0.75	1.36	1.37	4.05	12.35	2.49	59	105	95	292	930	187	0.238	-2.071	5.9054e-05	0.00104141	down	NW_018743977.1	2442883	2448213	-	LOC110689768	--	K00770 1,4-beta-D-xylan synthase [EC:2.4.2.24] | (RefSeq) cellulose synthase-like protein D5 (A)	cellulose synthase-like protein D5 [Chenopodium quinoa]	RecName: Full=Cellulose synthase-like protein D5; Short=AtCslD5; EC=2.4.1.-;	SubName: Full=Uncharacterized protein {ECO:0000313|EMBL:KNA05973.1};	--	GO:0005794,Golgi apparatus; GO:0000139,Golgi membrane; GO:0016021,integral component of membrane; GO:0016760,cellulose synthase (UDP-forming) activity; GO:0046527,glucosyltransferase activity; GO:0051753,mannan synthase activity; GO:0000919,cell plate assembly; GO:0042546,cell wall biogenesis; GO:0071555,cell wall organization; GO:0030244,cellulose biosynthetic process; GO:0071669,plant-type cell…	Cellulose synthase
gene-LOC110689786	1.6	2.15	2.75	6.32	14.41	5.03	45	59	68	162	386	134	0.324	-1.625	9.64776e-05	0.00155475	down	NW_018743977.1	2726547	2738168	+	LOC110689786	--	K10755 replication factor C subunit 2/4 | (RefSeq) replication factor C subunit 2-like (A)	replication factor C subunit 2-like [Chenopodium quinoa]	RecName: Full=Replication factor C subunit 2; Short=OsRFC2; AltName: Full=Activator 1 subunit 2;	SubName: Full=Uncharacterized protein {ECO:0000313|EMBL:KNA05205.1};	Replication factor C, subunit RFC4	GO:0005663,DNA replication factor C complex; GO:0005730,nucleolus; GO:0005634,nucleus; GO:0005524,ATP binding; GO:0003677,DNA binding; GO:0006281,DNA repair; GO:0006261,DNA-dependent DNA replication	Replication factor C C-terminal domain
gene-LOC110689817	14.47	1.64	12.68	0	0	0	1008	112	778	0	0	0	4501.89	12.136	4.3092e-11	3.48148e-09	up	NW_018743977.1	3601682	3607071	-	LOC110689817	--	K15255 ATP-dependent DNA helicase PIF1 [EC:3.6.4.12] | (RefSeq) uncharacterized protein LOC107022360 (A)	uncharacterized protein LOC110689817 isoform X1 [Chenopodium quinoa]	--	SubName: Full=uncharacterized protein LOC108984871 {ECO:0000313|RefSeq:XP_018812501.1};	DNA helicase PIF1/RRM3	--	Helitron helicase-like domain at N-terminus
gene-LOC110689835	0.69	1.13	1.41	10.59	10.86	7.27	5	8	9	70	75	50	0.14	-2.835	1.02858e-08	5.14223e-07	down	NW_018743977.1	4052107	4053784	+	LOC110689835	--	K11096 small nuclear ribonucleoprotein D2 | (RefSeq) small nuclear ribonucleoprotein Sm D2-like (A)	small nuclear ribonucleoprotein Sm D2-like [Chenopodium quinoa]	RecName: Full=Sm-like protein LSM3B {ECO:0000305}; Short=AtLSM3B {ECO:0000303|PubMed:23620288}; AltName: Full=U6 snRNA-associated Sm-like protein LSM3B {ECO:0000305};	SubName: Full=Uncharacterized protein {ECO:0000313|EMBL:OIT08708.1};	Small nuclear ribonucleoprotein (snRNP) Sm core protein	GO:0071013,catalytic step 2 spliceosome; GO:1990726,Lsm1-7-Pat1 complex; GO:0000932,P-body; GO:0071011,precatalytic spliceosome; GO:0046540,U4/U6 x U5 tri-snRNP complex; GO:0005688,U6 snRNP; GO:0003723,RNA binding; GO:0033962,cytoplasmic mRNA processing body assembly; GO:0000398,mRNA splicing, via spliceosome; GO:0000956,nuclear-transcribed mRNA catabolic process	LSM domain
gene-LOC110689836	0	0	0.04	0.79	0.81	0.79	0	0	2	41	44	43	0.019	-5.687	6.31589e-07	2.11353e-05	down	NW_018742329.1	772080	775026	+	LOC110689836	--	--	--	--	--	--	--	--
gene-LOC110689890	1.08	1.76	1.09	0.59	1.08	0.42	44	70	39	22	42	16	2.389	1.256	0.00566597	0.0381953	up	NW_018742329.1	1321799	1325212	-	LOC110689890	--	--	--	--	--	--	--	--
gene-LOC110689918	0.5	0.11	0.27	0	0	0	19	4	9	0	0	0	74.881	6.227	0.000169959	0.00245164	up	NW_018743977.1	799222	802096	-	LOC110689918	--	--	uncharacterized protein LOC110689918 [Chenopodium quinoa]	--	--	--	--	--
gene-LOC110689922	0.37	0.27	0.6	0	0.08	0.11	14	10	20	0	3	4	8.003	3.001	0.00237173	0.0197662	up	NW_018743977.1	1079472	1081756	-	LOC110689922	--	K00889 1-phosphatidylinositol-4-phosphate 5-kinase [EC:2.7.1.68] | (RefSeq) phosphatidylinositol 4-phosphate 5-kinase 6-like (A)	uncharacterized protein LOC110689922 [Chenopodium quinoa]	RecName: Full=Ankyrin repeat-containing protein BDA1 {ECO:0000305}; AltName: Full=Protein BIAN DA 1 {ECO:0000303|PubMed:22740615};	SubName: Full=Uncharacterized protein {ECO:0000313|EMBL:KMS95414.1};	FOG: Ankyrin repeat	GO:0016021,integral component of membrane; GO:0005886,plasma membrane; GO:0045087,innate immune response; GO:0009751,response to salicylic acid	Ankyrin repeats (3 copies)
gene-LOC110689943	1.95	0.06	1.04	0	0	0	34	1	16	0	0	0	121.778	6.928	0.000112386	0.00176542	up	NW_018743978.1	15754	16607	+	LOC110689943	--	--	miraculin-like [Chenopodium quinoa]	RecName: Full=Miraculin; Short=MIR; Flags: Precursor;	SubName: Full=Uncharacterized protein {ECO:0000313|EMBL:KNA03096.1};	--	GO:0004866,endopeptidase inhibitor activity	Trypsin and protease inhibitor
gene-LOC110689958	2.75	2.19	3.07	0	0	0	54	42	53	0	0	0	338.721	8.404	4.61388e-11	3.68764e-09	up	NW_018742329.1	1869560	1872939	-	LOC110689958	--	--	--	--	--	--	--	--
gene-LOC110689964	0	0	0	0.27	0.76	0.68	0	0	0	3	9	8	0.035	-4.848	0.00772176	0.0477894	down	NW_018742329.1	1917563	1920232	+	LOC110689964	--	--	--	--	--	--	--	--
gene-LOC110689976	1.07	1.76	2.06	4.49	6.3	3.87	23	37	39	88	129	79	0.418	-1.258	0.000354473	0.00444329	down	NW_018743979.1	99425	103920	-	LOC110689976	--	--	uncharacterized protein LOC110689976 [Chenopodium quinoa]	--	SubName: Full=Uncharacterized protein {ECO:0000313|EMBL:KNA14839.1}; Flags: Fragment;	--	--	Ulp1 protease family, C-terminal catalytic domain
gene-LOC110690032	0.03	0.03	0.02	0.42	0.32	0.3	2	2	1	27	21	20	0.09	-3.47	9.37145e-05	0.00151888	down	NW_018743979.1	3568552	3573519	+	LOC110690032	--	--	--	--	--	--	--	--
gene-LOC110690042	0.3	0.55	0.69	1.98	4.25	1.77	16	29	33	98	220	91	0.243	-2.043	5.73798e-06	0.000144889	down	NW_018743979.1	4220204	4224184	-	LOC110690042	--	--	glutamic acid-rich protein-like [Chenopodium quinoa]	--	SubName: Full=Uncharacterized protein {ECO:0000313|EMBL:KNA25685.1};	--	--	Cobalamin biosynthesis protein CobT
gene-LOC110690063	3.51	1.12	5.65	1.66	1.57	1.33	427	134	606	185	183	154	2.888	1.53	0.00341287	0.0261441	up	NW_018742329.1	2476301	2486099	-	LOC110690063	--	--	uncharacterized protein LOC110690063 isoform X1 [Chenopodium quinoa]	--	SubName: Full=Uncharacterized protein {ECO:0000313|EMBL:KNA02738.1}; Flags: Fragment;	--	--	--
gene-LOC110690117	0.38	1.41	0.64	2.86	3.07	3.26	23	83	34	157	176	186	0.321	-1.64	0.000130019	0.00199307	down	NW_018743987.1	848613	856519	-	LOC110690117	--	K03011 DNA-directed RNA polymerase II subunit RPB3 | (RefSeq) uncharacterized protein LOC107953086 (A)	uncharacterized protein LOC110690117 isoform X1 [Chenopodium quinoa]	--	SubName: Full=Uncharacterized protein {ECO:0000313|EMBL:KNA11941.1};	--	GO:0016021,integral component of membrane	Protein of unknown function (DUF616)
gene-LOC110690169	0.26	0	0.46	0	0	0	12	0	19	0	0	0	73.859	6.207	0.00366189	0.0274974	up	NW_018743987.1	1826168	1829208	+	LOC110690169	--	K15255 ATP-dependent DNA helicase PIF1 [EC:3.6.4.12] | (RefSeq) uncharacterized protein LOC101786894 (A)	uncharacterized protein LOC110690169 [Chenopodium quinoa]	--	SubName: Full=Uncharacterized protein {ECO:0000313|EMBL:PKU86419.1};	DNA helicase PIF1/RRM3	--	Helitron helicase-like domain at N-terminus
gene-LOC110690203	3.04	3.45	3.18	0.16	0	0	63	70	58	3	0	0	78.502	6.295	1.42505e-11	1.24687e-09	up	NW_018743992.1	10036	15010	-	LOC110690203	--	--	succinate dehydrogenase assembly factor 2, mitochondrial-like [Chenopodium quinoa]	RecName: Full=Succinate dehydrogenase assembly factor 2, mitochondrial {ECO:0000305}; Short=SDH assembly factor 2 {ECO:0000305}; Flags: Precursor;	SubName: Full=Uncharacterized protein {ECO:0000313|EMBL:KNA10602.1};	Uncharacterized conserved protein	GO:0005739,mitochondrion; GO:0006121,mitochondrial electron transport, succinate to ubiquinone; GO:0034553,mitochondrial respiratory chain complex II assembly; GO:0018293,protein-FAD linkage; GO:0006099,tricarboxylic acid cycle	Flavinator of succinate dehydrogenase
gene-LOC110690204	0.87	0.78	1.51	0	0	0	17	15	26	0	0	0	132.133	7.046	4.98709e-07	1.71509e-05	up	NW_018743992.1	40027	42078	-	LOC110690204	--	--	--	--	--	--	--	--
gene-LOC110690215	0	0	0	0.65	0.93	0.63	0	0	0	6	9	6	0.033	-4.922	0.00452408	0.0322549	down	NW_018744020.1	265861	266460	-	LOC110690215	--	K17767 AH receptor-interacting protein | (RefSeq) peptidyl-prolyl cis-trans isomerase FKBP62-like (A)	peptidyl-prolyl cis-trans isomerase FKBP62-like [Chenopodium quinoa]	RecName: Full=Peptidyl-prolyl cis-trans isomerase FKBP62; Short=PPIase FKBP62; EC=5.2.1.8; AltName: Full=70 kDa peptidyl-prolyl isomerase; AltName: Full=FK506-binding protein 62; Short=AtFKBP62; AltName: Full=Immunophilin FKBP62; AltName: Full=Peptidylprolyl isomerase ROF1; AltName: Full=Protein ROTAMASE FKBP 1; AltName: Full=Rotamase;	SubName: Full=Uncharacterized protein {ECO:0000313|EMBL:KMS96588.1};	FKBP-type peptidyl-prolyl cis-trans isomerase	GO:0005737,cytoplasm; GO:0005634,nucleus; GO:0005516,calmodulin binding; GO:0005528,FK506 binding; GO:0003755,peptidyl-prolyl cis-trans isomerase activity; GO:0070370,cellular heat acclimation; GO:0061077,chaperone-mediated protein folding	Tetratricopeptide repeat
gene-LOC110690221	0.16	0.41	0.16	0.58	1.03	1.03	18	45	16	60	111	110	0.34	-1.557	0.00100284	0.0101996	down	NW_018744020.1	582	12171	+	LOC110690221	--	--	uncharacterized protein LOC110735351 isoform X1 [Chenopodium quinoa]	--	SubName: Full=Uncharacterized protein {ECO:0000313|EMBL:KNA24204.1}; Flags: Fragment;	--	--	Plant transposase (Ptta/En/Spm family)
gene-LOC110690229	0.82	1.36	1.54	3.18	6.16	2.46	26	42	43	92	186	74	0.4	-1.321	0.00157054	0.0144969	down	NW_018744020.1	400159	414191	-	LOC110690229	--	K08073 bifunctional polynucleotide phosphatase/kinase [EC:3.1.3.32 2.7.1.78] | (RefSeq) polynucleotide 3'-phosphatase ZDP-like (A)	polynucleotide 3'-phosphatase ZDP-like [Chenopodium quinoa]	RecName: Full=Polynucleotide 3'-phosphatase ZDP; EC=3.1.3.32; AltName: Full=DNA nick sensor protein;	SubName: Full=Uncharacterized protein {ECO:0000313|EMBL:KNA25491.1};	Polynucleotide kinase 3' phosphatase	GO:0005654,nucleoplasm; GO:0005634,nucleus; GO:0046404,ATP-dependent polydeoxyribonucleotide 5'-hydroxyl-kinase activity; GO:0003690,double-stranded DNA binding; GO:0019201,NA; GO:0046403,polynucleotide 3'-phosphatase activity; GO:0008270,zinc ion binding; GO:0098504,DNA 3' dephosphorylation involved in DNA repair; GO:0098506,polynucleotide 3' dephosphorylation; GO:0006355,regulation of transcrip…	Polynucleotide kinase 3 phosphatase
gene-LOC110690235	0	0	0	2.92	5.14	2.81	0	0	0	25	46	25	0.007	-7.103	1.19901e-07	4.80186e-06	down	NW_018744020.1	419635	420647	-	LOC110690235	--	--	--	--	--	--	--	--
gene-LOC110690248	0.2	0.15	0.06	0.31	0.91	0.73	11	8	3	16	49	39	0.267	-1.904	0.00666302	0.0430705	down	NW_018744024.1	38101	42819	-	LOC110690248	--	--	--	--	--	--	--	--
gene-LOC110690262	0.63	1.34	1.31	0	0	0	16	33	29	0	0	0	172.965	7.434	3.71705e-08	1.65402e-06	up	NW_018744026.1	4482023	4483500	+	LOC110690262	--	--	uncharacterized protein LOC110690262 [Chenopodium quinoa]	--	SubName: Full=Uncharacterized protein {ECO:0000313|EMBL:KNA09889.1};	--	GO:0005524,ATP binding	--
gene-LOC110690276	0	0	0	0.63	1.95	1.35	0	0	0	9	29	20	0.012	-6.372	1.56228e-05	0.000339878	down	NW_018744026.1	649602	650917	+	LOC110690276	--	--	--	--	--	--	--	--
gene-LOC110690277	0	0	0	1.09	1.15	1.32	0	0	0	31	34	39	0.007	-7.253	3.59939e-08	1.6055e-06	down	NW_018744026.1	755953	759500	-	LOC110690277	--	--	--	--	--	--	--	--
gene-LOC110690292	916.39	694.68	703.26	522.06	356.45	549.97	32683	24262	22096	17006	12136	18636	2.037	1.027	0.000914173	0.00946314	up	NW_018744026.1	3296698	3301277	+	LOC110690292	--	K00927 phosphoglycerate kinase [EC:2.7.2.3] | (RefSeq) phosphoglycerate kinase, chloroplastic-like (A)	phosphoglycerate kinase, chloroplastic-like [Chenopodium quinoa]	RecName: Full=Phosphoglycerate kinase, chloroplastic; EC=2.7.2.3; Flags: Precursor; Fragment;	RecName: Full=Phosphoglycerate kinase {ECO:0000256|RuleBase:RU000532}; EC=2.7.2.3 {ECO:0000256|RuleBase:RU000532};	3-phosphoglycerate kinase	GO:0009507,chloroplast; GO:0005524,ATP binding; GO:0004618,phosphoglycerate kinase activity; GO:0006096,glycolytic process; GO:0019253,reductive pentose-phosphate cycle	Phosphoglycerate kinase
gene-LOC110690295	7.91	10.49	13.42	1.5	2.58	1.42	305	396	456	53	95	52	7.305	2.869	3.24321e-22	1.22013e-19	up	NW_018744026.1	3956734	3968732	+	LOC110690295	--	K14778 ATP-dependent RNA helicase DDX49/DBP8 [EC:3.6.4.13] | (RefSeq) DEAD-box ATP-dependent RNA helicase 36-like (A)	DEAD-box ATP-dependent RNA helicase 36-like [Chenopodium quinoa]	RecName: Full=DEAD-box ATP-dependent RNA helicase 36; EC=3.6.4.13;	SubName: Full=Uncharacterized protein {ECO:0000313|EMBL:KNA25385.1};	ATP-dependent RNA helicase	GO:0005737,cytoplasm; GO:0005730,nucleolus; GO:0005634,nucleus; GO:0090406,pollen tube; GO:0005524,ATP binding; GO:0004004,ATP-dependent RNA helicase activity; GO:0003676,nucleic acid binding; GO:0009553,embryo sac development; GO:0009561,megagametogenesis; GO:0009791,post-embryonic development; GO:0010501,RNA secondary structure unwinding; GO:0006364,rRNA processing	DEAD/DEAH box helicase
gene-LOC110690298	13.96	11.66	14.76	6.17	5.63	6.94	379	310	353	153	146	179	2.711	1.439	8.56814e-08	3.5665e-06	up	NW_018744026.1	4502955	4506296	+	LOC110690298	--	--	--	--	--	--	--	--
[truncated: 3,788 more rows]
