# Supplementary material for: Elucidating the Differentiation Synthesis Mechanisms of Differently Colored Resistance Quinoa Seedings Using Metabolite Profiling and Transcriptome Analysis
Source: Metabolites. 2023 Oct 10;13(10):1065. doi: 10.3390/metabo13101065 (PMC10609267; doi:10.3390/metabo13101065)
Supplement: Supplementary file 1 [file metabolites-13-01065-s001.zip › Table S20.xlsx]

## Sheet: Sheet1
Table S20 Number of differential genes in R-YvsR-B
ID	R-B1_fpkm	R-B2_fpkm	R-B3_fpkm	R-Y1_fpkm	R-Y2_fpkm	R-Y3_fpkm	R-B1_count	R-B2_count	R-B3_count	R-Y1_count	R-Y2_count	R-Y3_count	FoldChange	log2FoldChange	pvalue	padj	regulated	chr	start	end	strand	gene_name	gene_description	KEGG	NR	Swissprot	Tremble	KOG	GO	Pfam
gene-CDC77_pgr001	2.2	1.78	2.76	0.67	0.63	0.7	67	53	74	19	20	19	3.287	1.717	8.11975e-05	0.00374613	up	NC_034949.1	135545	137035	-	rrn16	--	--	--	--	--	--	--	--
gene-CDC77_pgr008	3.85	2.35	5.79	1.31	1.29	1.57	117	70	155	37	41	43	2.798	1.484	0.00124134	0.029942	up	NC_034949.1	98647	100137	+	rrn16	--	--	--	--	--	--	--	--
gene-LOC110681586	0.62	0.47	0.55	0	0	0	42	31	33	0	0	0	188.369	7.557	1.79022e-08	2.24183e-06	up	NW_018743555.1	3390031	3394211	-	LOC110681586	--	--	uncharacterized protein LOC110681586 [Chenopodium quinoa]	--	SubName: Full=Uncharacterized protein {ECO:0000313|EMBL:KNA13421.1};	--	--	--
gene-LOC110681589	0.79	0.21	0.69	2.41	1.99	1.39	35	9	27	99	92	55	0.294	-1.764	0.0022883	0.0453121	down	NW_018743555.1	3500611	3506884	-	LOC110681589	--	--	uncharacterized protein LOC110681589 [Chenopodium quinoa]	--	SubName: Full=uncharacterized protein LOC104230689 isoform X1 {ECO:0000313|RefSeq:XP_009781855.1};	--	--	Plant transposase (Ptta/En/Spm family)
gene-LOC110681619	6.34	3.59	9.97	0.42	0.93	1.19	130	72	180	8	20	22	7.473	2.902	9.7405e-07	8.45589e-05	up	NW_018742244.1	2710033	2711038	-	LOC110681619	--	K13993 HSP20 family protein | (RefSeq) uncharacterized protein LOC110681619 (A)	uncharacterized protein LOC110681619 [Chenopodium quinoa]	RecName: Full=14.7 kDa heat shock protein; Short=AtHsp14.7;	SubName: Full=Uncharacterized protein {ECO:0000313|EMBL:CDP09952.1};	--	GO:0005737,cytoplasm	Hsp20/alpha crystallin family
gene-LOC110681777	1.64	1.48	2.13	0.81	0.74	0.59	78	69	89	36	37	25	2.38	1.251	0.000920044	0.0240658	up	NW_018742244.1	2853456	2857876	-	LOC110681777	--	K15078 structure-specific endonuclease subunit SLX1 [EC:3.6.1.-] | (RefSeq) putative disease resistance protein RGA3 (A)	putative disease resistance protein RGA3 [Chenopodium quinoa]	RecName: Full=Putative disease resistance protein RGA3; AltName: Full=Blight resistance protein B149; AltName: Full=RGA1-blb;	SubName: Full=disease resistance protein RGA2-like isoform X2 {ECO:0000313|RefSeq:XP_018825449.1};	Apoptotic ATPase	GO:0043531,ADP binding; GO:0005524,ATP binding; GO:0006952,defense response	NB-ARC domain
gene-LOC110681794	15.37	30.58	30.92	9.26	11.89	7	540	1052	957	303	438	221	2.573	1.364	4.75063e-05	0.00243216	up	NW_018742244.1	2872935	2874659	-	LOC110681794	--	--	LOW QUALITY PROTEIN: protein EXORDIUM-like 5 [Chenopodium quinoa]	RecName: Full=Protein EXORDIUM-like 5; Flags: Precursor;	SubName: Full=Uncharacterized protein {ECO:0000313|EMBL:KNA13166.1};	--	GO:0048046,apoplast; GO:0005615,extracellular space	Phosphate-induced protein 1 conserved region
gene-LOC110681817	0.62	0.61	0.47	1.36	1.97	1.09	24	23	16	49	80	38	0.368	-1.441	0.00258618	0.0492368	down	NW_018743574.1	444110	448239	-	LOC110681817	--	K00688 glycogen phosphorylase [EC:2.4.1.1] | (RefSeq) glycogen phosphorylase 1-like isoform X1 (A)	ACT domain-containing protein ACR6-like [Chenopodium quinoa]	RecName: Full=ACT domain-containing protein ACR6 {ECO:0000305}; AltName: Full=Protein ACT DOMAIN REPEATS 6 {ECO:0000303|PubMed:12481063};	SubName: Full=Uncharacterized protein {ECO:0000313|EMBL:KNA14680.1}; Flags: Fragment;	--	GO:0016597,amino acid binding	ACT domain
gene-LOC110681824	3	3.67	6.37	2.31	1.54	1.12	152	182	284	109	82	51	2.556	1.354	0.000627741	0.0182385	up	NW_018742244.1	2911059	2919104	+	LOC110681824	--	K14771 U3 small nucleolar RNA-associated protein 19 | (RefSeq) nucleolar complex protein 4 homolog B-like (A)	nucleolar complex protein 4 homolog B-like [Chenopodium quinoa]	--	SubName: Full=Uncharacterized protein {ECO:0000313|EMBL:KNA05689.1};	Predicted nucleolar protein involved in ribosome biogenesis	GO:0042254,ribosome biogenesis	CBF/Mak21 family
gene-LOC110681913	20.67	12.78	11.93	25.58	40.08	50.36	834	505	424	961	1696	1827	0.378	-1.403	0.000602784	0.0177938	down	NW_018743574.1	1550086	1553899	-	LOC110681913	--	K21995 unsaturated fatty acid epoxidase [EC:1.14.-.-] | (RefSeq) cytochrome P450 family 87 protein (A)	cytochrome P450 89A2-like [Chenopodium quinoa]	RecName: Full=Cytochrome P450 89A2; EC=1.14.-.-; AltName: Full=ATH 6-1; AltName: Full=CYPLXXXIX;	SubName: Full=Uncharacterized protein {ECO:0000313|EMBL:KNA17697.1};	Cytochrome P450 CYP2 subfamily	GO:0016021,integral component of membrane; GO:0016020,membrane; GO:0020037,heme binding; GO:0005506,iron ion binding; GO:0016709,oxidoreductase activity, acting on paired donors, with incorporation or reduction of molecular oxygen, NAD(P)H as one donor, and incorporation of one atom of oxygen; GO:0044550,secondary metabolite biosynthetic process	Cytochrome P450
gene-LOC110681944	2.09	1.99	1.99	5.39	10.46	8.71	89	83	75	214	468	334	0.234	-2.093	2.63594e-08	3.20053e-06	down	NW_018743574.1	1808606	1813071	-	LOC110681944	--	K16871 4-aminobutyrate---pyruvate transaminase [EC:2.6.1.96] | (RefSeq) gamma aminobutyrate transaminase 3, chloroplastic-like (A)	gamma aminobutyrate transaminase 3, chloroplastic-like [Chenopodium quinoa]	RecName: Full=Gamma aminobutyrate transaminase 3, chloroplastic; AltName: Full=Gamma-aminobutyrate transaminase isozyme 3; Short=LeGABA-TP3; Short=SlGABA-T3; EC=2.6.1.96; Flags: Precursor;	SubName: Full=Uncharacterized protein {ECO:0000313|EMBL:KNA24573.1};	Alanine-glyoxylate aminotransferase AGT2	GO:0009507,chloroplast; GO:0034387,4-aminobutyrate:pyruvate transaminase activity; GO:0102351,gamma-aminobutyrate transaminase (glyoxylate dependent) activity; GO:0030170,pyridoxal phosphate binding	Aminotransferase class-III
gene-LOC110682184	32.48	44.71	53.67	31.13	14.5	11.96	946	1275	1377	844	443	313	2.246	1.167	0.00088291	0.0233838	up	NW_018742244.1	3265177	3267272	-	LOC110682184	--	K15032 mTERF domain-containing protein, mitochondrial | (RefSeq) transcription termination factor MTERF6, chloroplastic/mitochondrial-like (A)	transcription termination factor MTERF6, chloroplastic/mitochondrial-like [Chenopodium quinoa]	RecName: Full=Transcription termination factor MTERF6, chloroplastic/mitochondrial {ECO:0000305}; AltName: Full=Mitochondrial transcription termination factor 6 {ECO:0000303|PubMed:23087700}; AltName: Full=Protein PIGMENT DEFECTIVE 191 {ECO:0000305}; Flags: Precursor;	SubName: Full=Uncharacterized protein {ECO:0000313|EMBL:KNA22834.1};	Mitochondrial transcription termination factor, mTERF	GO:0009507,chloroplast; GO:0005739,mitochondrion; GO:0003690,double-stranded DNA binding; GO:0003723,RNA binding; GO:0006353,DNA-templated transcription, termination; GO:0006355,regulation of transcription, DNA-templated; GO:0008033,tRNA processing	mTERF
gene-LOC110682193	1.9	2.43	4.85	1.1	0.54	0.63	74	93	167	40	22	22	3.967	1.988	5.13249e-05	0.00259473	up	NW_018742244.1	3268099	3272060	+	LOC110682193	--	K03457 nucleobase:cation symporter-1, NCS1 family | (RefSeq) pentatricopeptide repeat-containing protein At4g38150 isoform X1 (A)	pentatricopeptide repeat-containing protein At4g38150-like [Chenopodium quinoa]	RecName: Full=Pentatricopeptide repeat-containing protein At4g38150;	SubName: Full=Uncharacterized protein {ECO:0000313|EMBL:KNA22836.1};	FOG: PPR repeat	GO:0043231,intracellular membrane-bounded organelle; GO:0004519,endonuclease activity; GO:0003723,RNA binding; GO:0009451,RNA modification	PPR repeat family
gene-LOC110682224	0	0	0	0.15	0.29	0.61	0	0	0	4	9	16	0.018	-5.818	0.00094906	0.0245921	down	NW_018742244.1	3308771	3311304	-	LOC110682224	--	K13082 bifunctional dihydroflavonol 4-reductase/flavanone 4-reductase [EC:1.1.1.219 1.1.1.234] | (RefSeq) dihydroflavonol 4-reductase-like (A)	tetraketide alpha-pyrone reductase 1-like [Chenopodium quinoa]	RecName: Full=Tetraketide alpha-pyrone reductase 1; EC=1.1.1.-; AltName: Full=Protein DIHYDROFLAVONOL 4-REDUCTASE-LIKE 1;	SubName: Full=Uncharacterized protein {ECO:0000313|EMBL:KNA23124.1};	Flavonol reductase/cinnamoyl-CoA reductase	GO:0005783,endoplasmic reticulum; GO:0005634,nucleus; GO:0050662,coenzyme binding; GO:0016491,oxidoreductase activity; GO:0009555,pollen development; GO:0010584,pollen exine formation; GO:0048316,seed development; GO:0080110,sporopollenin biosynthetic process	NAD dependent epimerase/dehydratase family
gene-LOC110682259	8.44	2.23	3.25	0.33	1	0.38	274	71	93	10	34	11	8.032	3.006	2.26565e-05	0.00132187	up	NW_018743574.1	5194541	5197387	+	LOC110682259	--	K14491 two-component response regulator ARR-B family | (RefSeq) two-component response regulator ORR24-like (A)	transcription factor HHO5-like [Chenopodium quinoa]	RecName: Full=Transcription factor HHO5 {ECO:0000305}; AltName: Full=MYB-domain transcription factor HHO5 {ECO:0000305}; AltName: Full=Protein HRS1 HOMOLOG 5 {ECO:0000305}; AltName: Full=Protein ULT1 INTERACTING FACTOR 1 {ECO:0000303|PubMed:26903506};	SubName: Full=Uncharacterized protein {ECO:0000313|EMBL:KNA14814.1};	--	GO:0005829,cytosol; GO:0005634,nucleus; GO:0003700,DNA-binding transcription factor activity; GO:0044212,transcription regulatory region DNA binding; GO:0048449,floral organ formation; GO:0010629,negative regulation of gene expression; GO:0006355,regulation of transcription, DNA-templated; GO:0090701,specification of plant organ identity; GO:0006351,transcription, DNA-templated	Myb-like DNA-binding domain
gene-LOC110682260	0.81	0.79	0.9	0.46	0.32	0.3	103	98	100	54	42	34	2.279	1.188	0.000241326	0.00884124	up	NW_018743574.1	5201004	5211664	+	LOC110682260	--	--	protein misato homolog 1-like isoform X1 [Chenopodium quinoa]	--	SubName: Full=Uncharacterized protein {ECO:0000313|EMBL:KNA09613.1};	Members of tubulin/FtsZ family	GO:0003924,GTPase activity	Misato Segment II tubulin-like domain
gene-LOC110682291	11.83	19.58	22.59	8.7	6.37	7.99	425	689	715	291	240	258	2.243	1.166	1.77714e-05	0.00106602	up	NW_018743574.1	5558789	5562807	+	LOC110682291	--	--	B3 domain-containing protein Os01g0234100-like [Chenopodium quinoa]	RecName: Full=B3 domain-containing protein Os01g0234100;	SubName: Full=Uncharacterized protein {ECO:0000313|EMBL:KNA12124.1};	--	GO:0005634,nucleus; GO:0003677,DNA binding; GO:0006355,regulation of transcription, DNA-templated; GO:0006351,transcription, DNA-templated	B3 DNA binding domain
gene-LOC110682457	0.21	0.37	0.12	0.6	1.79	1.45	10	17	5	26	88	61	0.17	-2.553	0.000162965	0.0064893	down	NW_018743574.1	7553520	7557873	-	LOC110682457	--	K00688 glycogen phosphorylase [EC:2.4.1.1] | (RefSeq) glycogen phosphorylase 1-like isoform X1 (A)	ACT domain-containing protein ACR1-like [Chenopodium quinoa]	RecName: Full=ACT domain-containing protein ACR1 {ECO:0000305}; AltName: Full=Protein ACT DOMAIN REPEATS 1 {ECO:0000303|PubMed:12481063};	SubName: Full=Uncharacterized protein {ECO:0000313|EMBL:KNA19451.1};	--	GO:0005634,nucleus; GO:0016597,amino acid binding	ACT domain
gene-LOC110682498	3.26	5.32	7.56	3.37	1.38	1.3	164	262	335	158	73	59	2.623	1.391	0.00149883	0.034012	up	NW_018743574.1	8073976	8081913	-	LOC110682498	--	K17681 ATPase family AAA domain-containing protein 3A/B | (RefSeq) ATPase family AAA domain-containing protein 3-like isoform X1 (A)	ATPase family AAA domain-containing protein 3-like isoform X1 [Chenopodium quinoa]	RecName: Full=Cell division cycle protein 48 homolog; AltName: Full=Valosin-containing protein homolog; Short=VCP;	SubName: Full=Uncharacterized protein {ECO:0000313|EMBL:KNA20205.1};	AAA+-type ATPase	GO:0005886,plasma membrane; GO:0005524,ATP binding; GO:0016787,hydrolase activity; GO:0007049,cell cycle	Domain of unknown function (DUF3523)
gene-LOC110682655	16.88	15.79	13.86	42.09	38.47	25.04	846	775	612	1964	2022	1128	0.431	-1.214	3.46877e-06	0.000260994	down	NW_018743575.1	273329	277696	-	LOC110682655	--	K01099 inositol polyphosphate 5-phosphatase INPP5B/F [EC:3.1.3.36] | (RefSeq) type IV inositol polyphosphate 5-phosphatase 9-like isoform X1 (A)	type I inositol polyphosphate 5-phosphatase 10 isoform X1 [Chenopodium quinoa]	RecName: Full=Type I inositol polyphosphate 5-phosphatase 10 {ECO:0000305}; Short=At5PTase10 {ECO:0000305}; EC=3.1.3.- {ECO:0000305};	SubName: Full=Uncharacterized protein {ECO:0000313|EMBL:KNA08477.1};	Inositol polyphosphate 5-phosphatase and related proteins	GO:0016787,hydrolase activity; GO:0046856,phosphatidylinositol dephosphorylation	Endonuclease/Exonuclease/phosphatase family
gene-LOC110682717	0.49	0.41	0.46	14.26	0.77	1.53	6	5	5	164	10	17	0.087	-3.521	0.000534092	0.0163643	down	NW_018743592.1	22462	25895	-	LOC110682717	--	--	uncharacterized protein LOC110738007 [Chenopodium quinoa]	--	SubName: Full=Uncharacterized protein {ECO:0000313|EMBL:KNA08153.1};	--	--	--
gene-LOC110682750	0	0	0	0.81	0.18	0.38	0	0	0	20	5	9	0.016	-5.958	0.000427417	0.013777	down	NW_018743593.1	778475	779906	+	LOC110682750	--	K17609 nucleoredoxin [EC:1.8.1.8] | (RefSeq) hypothetical protein (A)	uncharacterized protein LOC110682750 [Chenopodium quinoa]	--	SubName: Full=Uncharacterized protein {ECO:0000313|EMBL:KMS95847.1};	--	--	--
gene-LOC110682764	0.05	0.02	0.08	0.27	0.46	0.33	3	1	4	15	29	18	0.127	-2.972	0.000734909	0.0205386	down	NW_018743593.1	1378970	1386348	-	LOC110682764	--	K05894 12-oxophytodienoic acid reductase [EC:1.3.1.42] | (RefSeq) putative 12-oxophytodienoate reductase 11 isoform X1 (A)	12-oxophytodienoate reductase 1-like [Chenopodium quinoa]	RecName: Full=12-oxophytodienoate reductase 1; EC=1.3.1.42; AltName: Full=12-oxophytodienoate-10,11-reductase 1; Short=OPDA-reductase 1; AltName: Full=LeOPR1;	SubName: Full=Uncharacterized protein {ECO:0000313|EMBL:KNA25325.1}; Flags: Fragment;	NADH:flavin oxidoreductase/12-oxophytodienoate reductase	GO:0005737,cytoplasm; GO:0005622,intracellular; GO:0016629,12-oxophytodienoate reductase activity; GO:0010181,FMN binding; GO:0055114,oxidation-reduction process; GO:0031408,oxylipin biosynthetic process	NADH:flavin oxidoreductase / NADH oxidase family
gene-LOC110682802	5.97	7.97	7.7	33.46	15.19	9.7	111	145	126	579	296	162	0.369	-1.439	0.000562599	0.0169345	down	NW_018743593.1	3171008	3172608	-	LOC110682802	--	K07213 copper chaperone | (RefSeq) copper transport protein ATX1-like (A)	heavy metal-associated isoprenylated plant protein 24-like [Chenopodium quinoa]	RecName: Full=Heavy metal-associated isoprenylated plant protein 24 {ECO:0000303|PubMed:21072340, ECO:0000303|PubMed:23368984}; Short=AtHIP24 {ECO:0000303|PubMed:21072340, ECO:0000303|PubMed:23368984}; Flags: Precursor;	SubName: Full=Uncharacterized protein {ECO:0000313|EMBL:KNA07098.1}; Flags: Fragment;	Copper chaperone	GO:0005737,cytoplasm; GO:0046914,transition metal ion binding; GO:0046916,cellular transition metal ion homeostasis; GO:0030001,metal ion transport	Heavy-metal-associated domain
gene-LOC110682812	1.38	2.41	3.48	0.79	0.54	0.66	49	84	109	26	20	21	3.524	1.817	8.88343e-05	0.0040059	up	NW_018743593.1	3851108	3853304	-	LOC110682812	--	K02991 small subunit ribosomal protein S6e | (RefSeq) 40S ribosomal protein S6-like (A)	DNA ligase 1-like [Chenopodium quinoa]	--	SubName: Full=Uncharacterized protein {ECO:0000313|EMBL:KNA03074.1};	--	--	--
gene-LOC110682818	0.77	1.1	1.56	0.37	0.38	0.26	83	116	148	37	43	25	3.251	1.701	1.78168e-05	0.00106602	up	NW_018743593.1	3950022	3955310	-	LOC110682818	--	K15032 mTERF domain-containing protein, mitochondrial | (RefSeq) transcription termination factor MTERF4, chloroplastic-like (A)	transcription termination factor MTERF4, chloroplastic-like [Chenopodium quinoa]	RecName: Full=Transcription termination factor MTERF4, chloroplastic {ECO:0000305}; AltName: Full=Mitochondrial transcription termination factor 4 {ECO:0000303|PubMed:23087700}; AltName: Full=Protein BELAYA SMERT' {ECO:0000303|PubMed:21464319}; AltName: Full=Protein RUGOSA2 {ECO:0000303|PubMed:21790815}; Flags: Precursor;	SubName: Full=Uncharacterized protein {ECO:0000313|EMBL:CDP16039.1};	Mitochondrial transcription termination factor, mTERF	GO:0009507,chloroplast; GO:0005739,mitochondrion; GO:0009536,plastid; GO:0003690,double-stranded DNA binding; GO:0019843,rRNA binding; GO:0003727,single-stranded RNA binding; GO:0009658,chloroplast organization; GO:0032502,developmental process; GO:0006353,DNA-templated transcription, termination; GO:0009793,embryo development ending in seed dormancy; GO:0006355,regulation of transcription, DNA-t…	mTERF
gene-LOC110682827	0	0	0	1.42	0.47	0.72	0	0	0	43	16	21	0.007	-7.196	4.83344e-07	4.51204e-05	down	NW_018743593.1	779901	781491	+	LOC110682827	--	K17609 nucleoredoxin [EC:1.8.1.8] | (RefSeq) probable nucleoredoxin 1 (A)	probable nucleoredoxin 1, partial [Chenopodium quinoa]	RecName: Full=Probable nucleoredoxin 1; Short=AtNrx1; EC=1.8.1.8;	SubName: Full=Uncharacterized protein {ECO:0000313|EMBL:KMS95847.1};	Thioredoxin, nucleoredoxin and related proteins	GO:0005829,cytosol; GO:0047134,protein-disulfide reductase activity; GO:0004791,thioredoxin-disulfide reductase activity; GO:0045454,cell redox homeostasis; GO:0009860,pollen tube growth; GO:0010183,pollen tube guidance; GO:0080092,regulation of pollen tube growth; GO:0046686,response to cadmium ion	Thioredoxin-like
gene-LOC110682905	35.23	50.34	54.2	23.86	5.49	6.69	1224	1713	1659	772	200	209	3.915	1.969	4.38785e-05	0.00227879	up	NW_018743613.1	300208	302376	+	LOC110682905	--	K07374 tubulin alpha | (RefSeq) tubulin alpha-3 chain (A)	tubulin alpha-3 chain [Chenopodium quinoa]	RecName: Full=Tubulin alpha-5 chain;	RecName: Full=Tubulin alpha chain {ECO:0000256|RuleBase:RU000352};	Alpha tubulin	GO:0005737,cytoplasm; GO:0005874,microtubule; GO:0005525,GTP binding; GO:0003924,GTPase activity; GO:0005200,structural constituent of cytoskeleton; GO:0007017,microtubule-based process	Tubulin/FtsZ family, GTPase domain
gene-LOC110682948	1.91	2.2	1.23	6.51	4.2	5.08	23	26	13	73	53	55	0.331	-1.595	0.000209757	0.00791047	down	NW_018743616.1	1192949	1193886	-	LOC110682948	--	--	--	--	--	--	--	--
gene-LOC110682951	0.66	0.81	1.44	9.45	3.92	3.84	21	25	40	278	130	109	0.167	-2.579	5.27305e-08	6.05475e-06	down	NW_018742263.1	4196635	4199537	+	LOC110682951	--	--	--	--	--	--	--	--
gene-LOC110682953	33.43	50.2	40.89	0	0	0	387	569	417	0	0	0	2391.07	11.223	1.42873e-20	1.04793e-17	up	NW_018743616.1	2694678	2695659	-	LOC110682953	--	--	--	--	--	--	--	--
gene-LOC110682981	5.72	6.59	4.07	11.66	13.95	17.01	209	236	131	397	535	559	0.367	-1.447	4.44356e-06	0.000321979	down	NW_018743616.1	924832	929036	+	LOC110682981	--	K22684 metacaspase-1 [EC:3.4.22.-] | (RefSeq) metacaspase-5-like (A)	metacaspase-5-like [Chenopodium quinoa]	RecName: Full=Metacaspase-4; Short=AtMC4; EC=3.4.22.-; AltName: Full=Metacaspase 2d; Short=AtMCP2d; AltName: Full=Metacaspase-7; Contains: RecName: Full=Metacaspase-4 subunit p20; Contains: RecName: Full=Metacaspase-4 subunit p10;	SubName: Full=Uncharacterized protein {ECO:0000313|EMBL:KNA25521.1};	Metacaspase involved in regulation of apoptosis	GO:0005737,cytoplasm; GO:0005829,cytosol; GO:0005886,plasma membrane; GO:0009506,plasmodesma; GO:0004197,cysteine-type endopeptidase activity; GO:0008234,cysteine-type peptidase activity; GO:0042802,identical protein binding; GO:0006952,defense response; GO:0043068,positive regulation of programmed cell death; GO:0016540,protein autoprocessing	Caspase domain
gene-LOC110682991	3.46	3.31	2.53	9.15	9.61	5.22	279	261	180	687	812	378	0.378	-1.403	1.17809e-05	0.000742815	down	NW_018743616.1	1375234	1380417	-	LOC110682991	--	--	--	--	--	--	--	--
gene-LOC110683012	1.68	2.24	2.35	0	0	0	42	55	52	0	0	0	261.573	8.031	4.92831e-10	8.39447e-08	up	NW_018743616.1	1639665	1641226	+	LOC110683012	--	--	--	--	--	--	--	--
gene-LOC110683019	0.74	0.64	0.71	1.71	1.36	1.84	26	22	22	56	50	58	0.414	-1.271	0.00195776	0.0408606	down	NW_018743616.1	1784169	1789576	-	LOC110683019	--	K01206 alpha-L-fucosidase [EC:3.2.1.51] | (RefSeq) alpha-L-fucosidase 3-like (A)	GDSL esterase/lipase At5g03980-like isoform X1 [Chenopodium quinoa]	RecName: Full=GDSL esterase/lipase At1g28590; EC=3.1.1.-; AltName: Full=Extracellular lipase At1g28590; Flags: Precursor;	SubName: Full=Uncharacterized protein {ECO:0000313|EMBL:KMS96095.1};	--	GO:0005576,extracellular region; GO:0016788,hydrolase activity, acting on ester bonds; GO:0016042,lipid catabolic process	GDSL-like Lipase/Acylhydrolase
gene-LOC110683025	0	0	0	0.38	0.93	0.93	0	0	0	24	66	57	0.004	-8.128	3.35177e-09	4.95731e-07	down	NW_018743616.1	1875066	1879674	-	LOC110683025	--	--	--	--	--	--	--	--
gene-LOC110683083	37.49	45.6	50.74	17.17	22.65	22.28	816	972	973	348	517	436	2.048	1.034	5.65771e-05	0.00281242	up	NW_018742263.1	6363631	6364698	-	LOC110683083	--	--	protein E6-like [Chenopodium quinoa]	--	SubName: Full=Uncharacterized protein {ECO:0000313|EMBL:KNA15890.1};	--	--	--
gene-LOC110683086	0.14	0.41	0.16	2.75	2.01	1.34	6	17	6	108	89	51	0.113	-3.149	5.50118e-09	7.75342e-07	down	NW_018743616.1	3435104	3439015	-	LOC110683086	--	K00924 kinase [EC:2.7.1.-] | (RefSeq) probable receptor-like protein kinase At3g55450 isoform X1 (A)	probable serine/threonine-protein kinase PBL16 [Chenopodium quinoa]	RecName: Full=Probable serine/threonine-protein kinase PBL16 {ECO:0000305}; EC=2.7.11.1 {ECO:0000305}; AltName: Full=PBS1-like protein 16 {ECO:0000303|PubMed:20413097};	SubName: Full=Uncharacterized protein {ECO:0000313|EMBL:KNA18122.1};	Serine/threonine protein kinase	GO:0005886,plasma membrane; GO:0009506,plasmodesma; GO:0005524,ATP binding; GO:0004675,transmembrane receptor protein serine/threonine kinase activity; GO:0007166,cell surface receptor signaling pathway; GO:0006952,defense response; GO:0006468,protein phosphorylation	Protein tyrosine kinase
gene-LOC110683175	3.58	6.31	7.75	3.36	2.18	2.22	215	371	410	188	137	120	2.191	1.131	0.000458063	0.0145303	up	NW_018743623.1	467532	478815	-	LOC110683175	--	K17583 nucleolar MIF4G domain-containing protein 1 | (RefSeq) nucleolar MIF4G domain-containing protein 1-like isoform X1 (A)	nucleolar MIF4G domain-containing protein 1-like isoform X1 [Chenopodium quinoa]	--	SubName: Full=Uncharacterized protein {ECO:0000313|EMBL:KNA11125.1};	Protein involved in high osmolarity signaling pathway	GO:0003723,RNA binding	MIF4G domain
gene-LOC110683192	111.53	117.12	82.17	197.12	339.06	199.9	5337	5488	3464	8782	17016	8599	0.403	-1.313	8.0035e-05	0.00370201	down	NW_018743623.1	917060	920347	-	LOC110683192	--	--	cylicin-2-like [Chenopodium quinoa]	--	SubName: Full=Uncharacterized protein {ECO:0000313|EMBL:KNA06937.1};	--	--	--
gene-LOC110683195	0.3	0.75	0.81	1.59	1.41	2.25	11	27	26	54	54	74	0.334	-1.584	0.00156902	0.0351572	down	NW_018743623.1	931064	936099	-	LOC110683195	--	K17964 leucine-rich PPR motif-containing protein, mitochondrial | (RefSeq) putative pentatricopeptide repeat-containing protein At1g19290 (A)	pentatricopeptide repeat-containing protein At2g20710, mitochondrial-like [Chenopodium quinoa]	RecName: Full=Pentatricopeptide repeat-containing protein At2g20710, mitochondrial; Flags: Precursor;	SubName: Full=Uncharacterized protein {ECO:0000313|EMBL:KNA13220.1};	FOG: PPR repeat	GO:0043231,intracellular membrane-bounded organelle; GO:0005739,mitochondrion; GO:0004519,endonuclease activity; GO:0003723,RNA binding; GO:0009451,RNA modification	PPR repeat
gene-LOC110683232	3.24	4.04	1.09	0	0	0	27	33	8	0	0	0	116.873	6.869	5.66241e-06	0.000395928	up	NW_018742263.1	6914099	6915305	+	LOC110683232	--	--	--	--	--	--	--	--
gene-LOC110683293	1.89	5.15	0.47	0.08	0	0	77	205	17	3	0	0	94.028	6.555	9.79939e-08	1.06724e-05	up	NW_018743669.1	1373913	1378254	-	LOC110683293	--	K01953 asparagine synthase (glutamine-hydrolysing) [EC:6.3.5.4] | (RefSeq) asparagine synthetase [glutamine-hydrolyzing] 1-like (A)	asparagine synthetase [glutamine-hydrolyzing]	RecName: Full=Asparagine synthetase [glutamine-hydrolyzing]; EC=6.3.5.4; AltName: Full=Glutamine-dependent asparagine synthetase;	SubName: Full=Uncharacterized protein {ECO:0000313|EMBL:KNA18676.1};	Asparagine synthase (glutamine-hydrolyzing)	GO:0004066,asparagine synthase (glutamine-hydrolyzing) activity; GO:0005524,ATP binding; GO:0006541,glutamine metabolic process; GO:0070981,L-asparagine biosynthetic process	Asparagine synthase
gene-LOC110683333	1.14	1.14	0.73	2.07	2.99	2.64	48	47	27	81	132	100	0.374	-1.417	0.000408265	0.0133149	down	NW_018743669.1	66582	69627	-	LOC110683333	--	K05909 laccase [EC:1.10.3.2] | (RefSeq) laccase-17-like (A)	laccase-17-like [Chenopodium quinoa]	RecName: Full=Laccase-17; EC=1.10.3.2; AltName: Full=Benzenediol:oxygen oxidoreductase 17; AltName: Full=Diphenol oxidase 17; AltName: Full=Urishiol oxidase 17; Flags: Precursor;	RecName: Full=Laccase {ECO:0000256|RuleBase:RU361119}; EC=1.10.3.2 {ECO:0000256|RuleBase:RU361119}; AltName: Full=Benzenediol:oxygen oxidoreductase {ECO:0000256|RuleBase:RU361119}; AltName: Full=Diphenol oxidase {ECO:0000256|RuleBase:RU361119}; AltName: Full=Urishiol oxidase {ECO:0000256|RuleBase:RU361119};	Multicopper oxidases	GO:0048046,apoplast; GO:0005507,copper ion binding; GO:0052716,hydroquinone:oxygen oxidoreductase activity; GO:0016491,oxidoreductase activity; GO:0016722,oxidoreductase activity, oxidizing metal ions; GO:0009809,lignin biosynthetic process; GO:0046274,lignin catabolic process; GO:0009698,phenylpropanoid metabolic process	Multicopper oxidase
gene-LOC110683348	0.51	0.25	0.3	0.57	1.83	1.9	29	14	15	30	109	97	0.236	-2.08	0.00145301	0.0333043	down	NW_018743669.1	193763	196546	+	LOC110683348	--	K01176 alpha-amylase [EC:3.2.1.1] | (RefSeq) lectin-domain containing receptor kinase VI.3-like (A)	L-type lectin-domain containing receptor kinase IV.1-like [Chenopodium quinoa]	RecName: Full=L-type lectin-domain containing receptor kinase IV.2 {ECO:0000303|PubMed:19773388}; Short=Arabidopsis thaliana lectin-receptor kinase a4 {ECO:0000303|PubMed:19773388}; Short=AthlecRK-a4 {ECO:0000303|Ref.6}; Short=LecRK-IV.2 {ECO:0000303|PubMed:19773388}; EC=2.7.11.1 {ECO:0000255|PROSITE-ProRule:PRU00159}; AltName: Full=Protein SMALL, GLUED-TOGETHER, AND COLLAPSED POLLEN {ECO:0000303…	SubName: Full=probable L-type lectin-domain containing receptor kinase II.1 {ECO:0000313|RefSeq:XP_018855504.1};	--	GO:0016021,integral component of membrane; GO:0005886,plasma membrane; GO:0005524,ATP binding; GO:0030246,carbohydrate binding; GO:0004674,protein serine/threonine kinase activity; GO:0042742,defense response to bacterium; GO:0009555,pollen development	Legume lectin domain
gene-LOC110683389	41.06	50.54	78.3	35.08	21.1	15.65	1462	1762	2456	1163	788	501	2.323	1.216	0.000349907	0.0118081	up	NW_018743669.1	490022	492311	-	LOC110683389	--	K07375 tubulin beta | (RefSeq) tubulin beta-2 chain-like (A)	tubulin beta-2 chain-like [Chenopodium quinoa]	RecName: Full=Tubulin beta-3 chain;	RecName: Full=Tubulin beta chain {ECO:0000256|RuleBase:RU000352};	Beta tubulin	GO:0005737,cytoplasm; GO:0005874,microtubule; GO:0005525,GTP binding; GO:0003924,GTPase activity; GO:0005200,structural constituent of cytoskeleton; GO:0007017,microtubule-based process	Tubulin/FtsZ family, GTPase domain
gene-LOC110683401	17.68	18.86	14.53	7.73	8.72	6.37	290	303	210	118	150	94	2.158	1.109	5.32011e-05	0.00267046	up	NW_018743669.1	565095	566468	+	LOC110683401	--	--	uncharacterized protein LOC110683401 [Chenopodium quinoa]	--	SubName: Full=Uncharacterized protein {ECO:0000313|EMBL:KNA02968.1};	--	--	--
gene-LOC110683408	0	0	0	0.19	0.62	0.92	0	0	0	3	11	14	0.018	-5.76	0.00132996	0.0314464	down	NW_018742263.1	2818563	2819390	+	LOC110683408	--	K14857 AdoMet-dependent rRNA methyltransferase SPB1 [EC:2.1.1.-] | (RefSeq) putative rRNA methyltransferase (A)	uncharacterized protein LOC110683408 [Chenopodium quinoa]	--	SubName: Full=Uncharacterized protein {ECO:0000313|EMBL:CCA66020.1};	FOG: Reverse transcriptase	GO:0003676,nucleic acid binding	Endonuclease-reverse transcriptase
gene-LOC110683569	0.13	0.58	1.18	0	0	0	4	17	31	0	0	0	92.102	6.525	9.60308e-05	0.00426006	up	NW_018743669.1	2252608	2255668	-	LOC110683569	--	K13484 5-hydroxyisourate hydrolase / 2-oxo-4-hydroxy-4-carboxy-5-ureidoimidazoline decarboxylase [EC:3.5.2.17 4.1.1.97] | (RefSeq) L10-interacting MYB domain-containing protein-like (A)	L10-interacting MYB domain-containing protein-like [Chenopodium quinoa]	RecName: Full=L10-interacting MYB domain-containing protein {ECO:0000303|PubMed:25707794};	SubName: Full=Uncharacterized protein {ECO:0000313|EMBL:KNA13501.1};	--	GO:0005634,nucleus; GO:0006355,regulation of transcription, DNA-templated; GO:0006351,transcription, DNA-templated	Myb/SANT-like DNA-binding domain
gene-LOC110683604	0.18	0.13	0	0.22	0.79	2.38	7	5	0	8	33	85	0.086	-3.543	0.00177067	0.03829	down	NW_018743669.1	2723276	2726396	+	LOC110683604	--	K00521 ferric-chelate reductase [EC:1.16.1.7] | (RefSeq) ferric reduction oxidase 7, chloroplastic-like (A)	NAC domain-containing protein 90-like [Chenopodium quinoa]	RecName: Full=NAC domain-containing protein 90; Short=ANAC090;	SubName: Full=Uncharacterized protein {ECO:0000313|EMBL:OAY38223.1};	--	GO:0005634,nucleus; GO:0003677,DNA binding; GO:0003700,DNA-binding transcription factor activity; GO:0006351,transcription, DNA-templated	No apical meristem (NAM) protein
gene-LOC110683659	0.23	0.5	0.39	0	0	0	8	17	12	0	0	0	63.993	6	0.000152196	0.00614835	up	NW_018743689.1	599598	604464	-	LOC110683659	--	--	uncharacterized protein LOC110683659 [Chenopodium quinoa]	--	SubName: Full=Uncharacterized protein {ECO:0000313|EMBL:KNA10379.1}; Flags: Fragment;	--	--	--
gene-LOC110683689	13.08	22.78	14.07	2.68	4.61	3.45	173	295	164	33	64	41	4.349	2.121	1.74571e-08	2.19374e-06	up	NW_018743691.1	4150987	4152452	-	LOC110683689	--	--	uncharacterized protein LOC110683689 [Chenopodium quinoa]	--	--	--	--	--
gene-LOC110683690	0	0	0	0.85	0.64	1.12	0	0	0	37	31	47	0.005	-7.764	6.45734e-09	8.89183e-07	down	NW_018743691.1	4351536	4353819	-	LOC110683690	--	K01322 prolyl oligopeptidase [EC:3.4.21.26] | (RefSeq) putative F-box/LRR-repeat protein At3g18150 (A)	F-box/FBD/LRR-repeat protein At5g22660-like [Chenopodium quinoa]	RecName: Full=F-box/FBD/LRR-repeat protein At5g22660;	SubName: Full=Uncharacterized protein {ECO:0000313|EMBL:KNA11711.1};	--	--	FBD
gene-LOC110683701	0.67	0.76	0.64	1.93	2.49	2.02	26	29	22	70	102	71	0.307	-1.706	9.07244e-06	0.000588562	down	NW_018743691.1	484985	492359	+	LOC110683701	--	K14638 solute carrier family 15 (peptide/histidine transporter), member 3/4 | (RefSeq) protein NRT1/ PTR FAMILY 2.3-like (A)	protein NRT1/ PTR FAMILY 2.3-like [Chenopodium quinoa]	RecName: Full=Protein NRT1/ PTR FAMILY 2.3; Short=AtNPF2.3; AltName: Full=Probable nitrate excretion transporter 3; AltName: Full=Protein NAXT1-like 2;	SubName: Full=Uncharacterized protein {ECO:0000313|EMBL:KMS95534.1};	H+/oligopeptide symporter	GO:0016021,integral component of membrane; GO:0005886,plasma membrane; GO:0015112,nitrate transmembrane transporter activity; GO:0071472,cellular response to salt stress; GO:0042128,nitrate assimilation; GO:0015706,nitrate transport; GO:0006857,oligopeptide transport; GO:0009624,response to nematode	POT family
gene-LOC110683709	0	0	0	0.44	0.27	0.21	0	0	0	13	9	6	0.02	-5.679	0.000712903	0.0200975	down	NW_018742263.1	1877142	1879104	+	LOC110683709	--	--	--	--	--	--	--	--
gene-LOC110683713	0	0	0	0.42	0.16	0.98	0	0	0	7	3	16	0.02	-5.662	0.00215501	0.0434143	down	NW_018743691.1	1323916	1329423	-	LOC110683713	--	K13201 nucleolysin TIA-1/TIAR | (RefSeq) oligouridylate-binding protein 1-like isoform X1 (A)	uncharacterized protein LOC110683713 [Chenopodium quinoa]	--	SubName: Full=Uncharacterized protein {ECO:0000313|EMBL:KNA26131.1};	--	GO:0016021,integral component of membrane	GRF zinc finger
gene-LOC110683727	0.63	0.69	0.44	2.05	1.35	1.2	39	42	24	119	88	67	0.375	-1.417	0.000170563	0.00669791	down	NW_018743691.1	1751654	1766647	-	LOC110683727	--	--	--	--	--	--	--	--
gene-LOC110683754	5.26	2.18	1.51	5.27	13.51	12.2	468	190	118	437	1261	976	0.282	-1.827	0.0016481	0.0365183	down	NW_018743691.1	2617695	2627577	-	LOC110683754	--	K21396 ATP-binding cassette, subfamily G (WHITE), eye pigment precursor transporter | (RefSeq) ABC transporter, ATP-binding protein (A)	ABC transporter G family member 24-like isoform X1 [Chenopodium quinoa]	RecName: Full=ABC transporter G family member 24; Short=ABC transporter ABCG.24; Short=AtABCG24; AltName: Full=Probable white-brown complex homolog protein 25; Short=AtWBC25;	SubName: Full=Protein white, putative {ECO:0000313|EMBL:EEF31449.1}; EC=3.6.3.44 {ECO:0000313|EMBL:EEF31449.1};	Transporter, ABC superfamily (Breast cancer resistance protein)	GO:0016021,integral component of membrane; GO:0005886,plasma membrane; GO:0005524,ATP binding; GO:0042626,ATPase activity, coupled to transmembrane movement of substances	ABC transporter
gene-LOC110683769	1.03	2.34	2.04	0.05	0.01	0.04	87	193	151	4	1	3	51.658	5.691	1.0875e-17	5.66446e-15	up	NW_018743691.1	2998818	3005674	-	LOC110683769	--	K01303 acylaminoacyl-peptidase [EC:3.4.19.1] | (RefSeq) uncharacterized LOC101311565 (A)	uncharacterized protein LOC110683769 [Chenopodium quinoa]	RecName: Full=RNA-directed DNA polymerase homolog; EC=2.7.7.48; AltName: Full=Reverse transcriptase homolog;	SubName: Full=Uncharacterized protein {ECO:0000313|EMBL:CAN65719.1};	FOG: Transposon-encoded proteins with TYA, reverse transcriptase, integrase domains in various combinations	GO:0005739,mitochondrion; GO:0003968,RNA-directed 5'-3' RNA polymerase activity; GO:0003964,RNA-directed DNA polymerase activity	Reverse transcriptase (RNA-dependent DNA polymerase)
gene-LOC110683782	1.19	1.05	1.91	0.24	0.2	0.15	81	70	115	15	14	9	6.97	2.801	5.05813e-09	7.21385e-07	up	NW_018743691.1	3294433	3299015	-	LOC110683782	--	K01087 trehalose 6-phosphate phosphatase [EC:3.1.3.12] | (RefSeq) trehalose-phosphate phosphatase A-like (A)	protein KINESIN LIGHT CHAIN-RELATED 2-like [Chenopodium quinoa]	RecName: Full=Protein KINESIN LIGHT CHAIN-RELATED 2 {ECO:0000303|PubMed:23204523}; AltName: Full=Kinesin light chain-like protein 1 {ECO:0000303|Ref.1}; Short=AtKLC1 {ECO:0000303|Ref.1};	SubName: Full=Uncharacterized protein {ECO:0000313|EMBL:KNA17424.1};	Kinesin light chain	GO:0005886,plasma membrane; GO:0009860,pollen tube growth; GO:0031347,regulation of defense response	Tetratricopeptide repeat
gene-LOC110683817	0.29	0.45	0.09	3.31	1.28	1.22	19	29	5	205	89	73	0.14	-2.836	4.10029e-06	0.000299521	down	NW_018743691.1	4033137	4037206	-	LOC110683817	--	--	--	--	--	--	--	--
gene-LOC110683818	0	0.05	0.17	1.26	1.07	0.82	0	2	6	48	46	30	0.064	-3.968	2.13688e-06	0.00016842	down	NW_018743691.1	4039827	4041835	-	LOC110683818	--	--	F-box/FBD/LRR-repeat protein At1g16930-like [Chenopodium quinoa]	RecName: Full=F-box/FBD/LRR-repeat protein At1g16930;	SubName: Full=Uncharacterized protein {ECO:0000313|EMBL:KNA11711.1};	--	--	FBD
gene-LOC110683826	1.51	1.97	1.81	0.62	0.63	0.37	55	70	58	21	24	12	3.138	1.65	8.77756e-05	0.00396812	up	NW_018743691.1	4332995	4334777	+	LOC110683826	--	--	--	--	--	--	--	--
gene-LOC110683827	0	0	0	1.16	0.93	2.39	0	0	0	33	30	66	0.004	-7.955	8.07482e-09	1.08865e-06	down	NW_018743691.1	4344280	4346089	-	LOC110683827	--	--	putative FBD-associated F-box protein At1g78730 [Chenopodium quinoa]	RecName: Full=Putative FBD-associated F-box protein At1g78730;	SubName: Full=Uncharacterized protein {ECO:0000313|EMBL:KNA11712.1};	--	--	--
gene-LOC110683835	41.02	30.77	21.64	56.54	110.26	67.65	2053	1508	954	2635	5788	3044	0.383	-1.383	0.000606808	0.0178613	down	NW_018743691.1	4586776	4590746	+	LOC110683835	--	K14638 solute carrier family 15 (peptide/histidine transporter), member 3/4 | (RefSeq) protein NRT1/ PTR FAMILY 8.3-like (A)	protein NRT1/ PTR FAMILY 6.4-like [Chenopodium quinoa]	RecName: Full=Protein NRT1/ PTR FAMILY 6.4; Short=AtNPF6.4; AltName: Full=Nitrate transporter 1.3;	SubName: Full=Uncharacterized protein {ECO:0000313|EMBL:KNA05956.1};	H+/oligopeptide symporter	GO:0016021,integral component of membrane; GO:0015293,symporter activity; GO:0042128,nitrate assimilation	POT family
gene-LOC110683880	0.03	0	0	0.37	0.65	0.38	1	0	0	12	24	12	0.022	-5.518	0.000180768	0.00701621	down	NW_018742263.1	4989683	5013369	+	LOC110683880	--	K00815 tyrosine aminotransferase [EC:2.6.1.5] | (RefSeq) tyrosine aminotransferase-like (A)	tyrosine aminotransferase-like [Chenopodium quinoa]	RecName: Full=Tyrosine aminotransferase; Short=TAT; EC=2.6.1.5; AltName: Full=L-tyrosine:2-oxoglutarate aminotransferase;	SubName: Full=Uncharacterized protein {ECO:0000313|EMBL:KNA13249.1};	Tyrosine aminotransferase	GO:0005829,cytosol; GO:0080130,L-phenylalanine:2-oxoglutarate aminotransferase activity; GO:0004838,L-tyrosine:2-oxoglutarate aminotransferase activity; GO:0030170,pyridoxal phosphate binding; GO:0009058,biosynthetic process; GO:0006520,cellular amino acid metabolic process; GO:0006559,L-phenylalanine catabolic process; GO:0006572,tyrosine catabolic process	Aminotransferase class I and II
gene-LOC110683892	0	0	0	8.25	3.27	3.03	0	0	0	141	63	50	0.002	-8.848	1.60167e-11	3.6433e-09	down	NW_018743691.1	3325080	3334396	+	LOC110683892	--	K14016 ubiquitin fusion degradation protein 1 | (RefSeq) uncharacterized protein LOC110683892 (A)	uncharacterized protein LOC110683892 [Chenopodium quinoa]	--	SubName: Full=Uncharacterized protein {ECO:0000313|EMBL:KJB47571.1};	Ubiquitin fusion-degradation protein	GO:0006511,ubiquitin-dependent protein catabolic process	Ubiquitin fusion degradation protein UFD1
gene-LOC110683899	0.25	0.42	0.53	1.35	1.77	1.88	9	15	17	46	68	62	0.224	-2.16	1.25756e-05	0.000788775	down	NW_018742263.1	5202400	5204197	-	LOC110683899	--	K03452 magnesium/proton exchanger | (RefSeq) pentatricopeptide repeat-containing protein At3g62890-like (A)	pentatricopeptide repeat-containing protein At2g42920, chloroplastic-like [Chenopodium quinoa]	RecName: Full=Pentatricopeptide repeat-containing protein At2g42920, chloroplastic; Flags: Precursor;	SubName: Full=Uncharacterized protein {ECO:0000313|EMBL:KNA13251.1};	FOG: PPR repeat	GO:0009507,chloroplast; GO:0043231,intracellular membrane-bounded organelle; GO:0004519,endonuclease activity; GO:0003723,RNA binding; GO:0009451,RNA modification	PPR repeat
gene-LOC110683910	0	0.03	0.04	1.39	1.38	1.12	0	1	1	41	46	32	0.016	-5.938	2.76591e-07	2.68667e-05	down	NW_018743691.1	4069836	4071395	+	LOC110683910	--	--	FBD-associated F-box protein At2g26860-like [Chenopodium quinoa]	RecName: Full=FBD-associated F-box protein At2g26860;	SubName: Full=Uncharacterized protein {ECO:0000313|EMBL:KMS95810.1};	--	--	FBD
gene-LOC110683983	1.86	5.52	5.43	1.38	1.06	1.53	42	122	108	29	25	31	3.044	1.606	0.00106279	0.0266666	up	NW_018743697.1	4964244	4965351	-	LOC110683983	--	K07441 beta-1,4-N-acetylglucosaminyltransferase [EC:2.4.1.141] | (RefSeq) UDP-N-acetylglucosamine transferase subunit ALG14 homolog (A)	auxin-responsive protein SAUR41-like [Chenopodium quinoa]	RecName: Full=Auxin-responsive protein SAUR41 {ECO:0000305}; AltName: Full=Protein SMALL AUXIN UP RNA 41 {ECO:0000303|PubMed:12036261};	SubName: Full=Uncharacterized protein {ECO:0000313|EMBL:KNA03323.1};	--	GO:0005737,cytoplasm; GO:0060918,auxin transport; GO:0009734,auxin-activated signaling pathway; GO:0009958,positive gravitropism; GO:0040008,regulation of growth; GO:0090057,root radial pattern formation	Auxin responsive protein
gene-LOC110683992	0.47	0.22	0.23	1.06	1.49	0.76	26	12	11	55	87	38	0.271	-1.883	0.00107287	0.0268702	down	NW_018743697.1	252	4839	+	LOC110683992	--	--	--	--	--	--	--	--
gene-LOC110683995	29.92	34.85	32.88	18.31	7.9	15.33	1322	1508	1280	753	366	609	2.305	1.205	5.34581e-05	0.00267866	up	NW_018743697.1	61934	67067	-	LOC110683995	--	K18878 BHLH transcription factor Upa20 | (RefSeq) Upa20; transcription factor bHLH137-like (A)	transcription factor bHLH137-like [Chenopodium quinoa]	RecName: Full=Transcription factor bHLH137; AltName: Full=Basic helix-loop-helix protein 137; Short=AtbHLH137; Short=bHLH 137; AltName: Full=Transcription factor EN 89; AltName: Full=bHLH transcription factor bHLH137;	SubName: Full=Uncharacterized protein {ECO:0000313|EMBL:KNA03216.1};	--	GO:0005634,nucleus; GO:0003677,DNA binding; GO:0003700,DNA-binding transcription factor activity; GO:0046983,protein dimerization activity; GO:0009739,response to gibberellin; GO:0006351,transcription, DNA-templated	Helix-loop-helix DNA-binding domain
gene-LOC110684365	20.32	29.47	37.07	13.92	7.72	12.78	359	510	577	229	143	203	2.44	1.287	3.4466e-05	0.00187399	up	NW_018742271.1	136747	138212	-	LOC110684365	--	--	uncharacterized protein At5g01610-like [Chenopodium quinoa]	--	SubName: Full=Uncharacterized protein {ECO:0000313|EMBL:KNA02678.1};	--	--	Protein of unknown function, DUF538
gene-LOC110684376	4.42	3.71	3.57	7.8	13.1	13.53	73	60	52	120	227	201	0.325	-1.624	3.85438e-05	0.00206675	down	NW_018743697.1	4323733	4328225	+	LOC110684376	--	K08336 ubiquitin-like protein ATG12 | (RefSeq) ubiquitin-like protein ATG12B (A)	ubiquitin-like protein ATG12B [Chenopodium quinoa]	RecName: Full=Ubiquitin-like protein ATG12B; AltName: Full=Autophagy-related protein 12b; Short=APG12-like protein b; Short=AtAPG12b;	RecName: Full=Ubiquitin-like protein ATG12 {ECO:0000256|RuleBase:RU361201};	Protein conjugation factor involved in autophagy	GO:0034274,Atg12-Atg5-Atg16 complex; GO:0034045,phagophore assembly site membrane; GO:0019776,Atg8 ligase activity; GO:0000045,autophagosome assembly; GO:0006914,autophagy; GO:0000422,autophagy of mitochondrion; GO:0044804,autophagy of nucleus; GO:0006501,C-terminal protein lipidation; GO:0015031,protein transport	Ubiquitin-like autophagy protein Apg12
gene-LOC110684420	7.81	12.64	6.8	17.9	32.36	26.28	193	306	148	412	839	584	0.333	-1.588	1.42239e-05	0.000879872	down	NW_018743697.1	4928067	4930571	-	LOC110684420	--	--	dormancy-associated protein homolog 4-like isoform X1 [Chenopodium quinoa]	RecName: Full=Dormancy-associated protein homolog 4 {ECO:0000305}; AltName: Full=DRM1 homolog 4 {ECO:0000305};	SubName: Full=dormancy-associated protein homolog 4 {ECO:0000313|RefSeq:XP_010261733.1};	--	--	Dormancy/auxin associated protein
gene-LOC110684423	0	0.05	0	0.32	1.8	1.27	0	1	0	6	38	23	0.015	-6.03	9.26411e-05	0.0041412	down	NW_018743697.1	4980300	4983022	-	LOC110684423	--	--	uncharacterized protein LOC110684423 [Chenopodium quinoa]	--	SubName: Full=Uncharacterized protein {ECO:0000313|EMBL:KNA22348.1};	--	--	Plant transposase (Ptta/En/Spm family)
gene-LOC110684491	3.31	4.16	7.39	2.64	1.85	2.08	174	214	342	129	102	98	2.19	1.131	0.0017215	0.0376432	up	NW_018742271.1	497430	508206	-	LOC110684491	--	K15429 tRNA (guanine37-N1)-methyltransferase [EC:2.1.1.228] | (RefSeq) tRNA (guanine(37)-N1)-methyltransferase 1-like (A)	tRNA (guanine(37)-N1)-methyltransferase 1-like [Chenopodium quinoa]	RecName: Full=tRNA (guanine(37)-N1)-methyltransferase 1 {ECO:0000255|HAMAP-Rule:MF_03152}; EC=2.1.1.228 {ECO:0000255|HAMAP-Rule:MF_03152}; AltName: Full=M1G-methyltransferase 1 {ECO:0000255|HAMAP-Rule:MF_03152}; AltName: Full=tRNA [GM37] methyltransferase 1 {ECO:0000255|HAMAP-Rule:MF_03152}; AltName: Full=tRNA methyltransferase 5 homolog 1 {ECO:0000255|HAMAP-Rule:MF_03152};	RecName: Full=tRNA (guanine(37)-N1)-methyltransferase {ECO:0000256|HAMAP-Rule:MF_03152}; EC=2.1.1.228 {ECO:0000256|HAMAP-Rule:MF_03152}; AltName: Full=M1G-methyltransferase {ECO:0000256|HAMAP-Rule:MF_03152}; AltName: Full=tRNA [GM37] methyltransferase {ECO:0000256|HAMAP-Rule:MF_03152}; AltName: Full=tRNA methyltransferase 5 homolog {ECO:0000256|HAMAP-Rule:MF_03152};	tRNA modification enzyme	GO:0005759,mitochondrial matrix; GO:0005634,nucleus; GO:0052906,tRNA (guanine(37)-N(1))-methyltransferase activity	Met-10+ like-protein
gene-LOC110684633	9.29	7.36	4.9	13.88	18.12	15.57	405	314	188	563	828	610	0.439	-1.187	0.00063611	0.0183041	down	NW_018743732.1	141156	143293	-	LOC110684633	--	K13161 heterogeneous nuclear ribonucleoprotein R | (RefSeq) nucleolin (A)	protein FANTASTIC FOUR 1-like [Chenopodium quinoa]	RecName: Full=Protein FANTASTIC FOUR 3;	SubName: Full=Uncharacterized protein {ECO:0000313|EMBL:KNA13593.1};	--	--	Fantastic Four meristem regulator
gene-LOC110684672	3.47	3.31	3.07	7.32	8.27	7.5	223	208	174	438	557	433	0.412	-1.281	1.04706e-07	1.13348e-05	down	NW_018743732.1	545693	551466	-	LOC110684672	--	K18873 pathogen-induced protein kinase | (RefSeq) serine/threonine-protein kinase CDL1-like (A)	probable serine/threonine-protein kinase PBL7 [Chenopodium quinoa]	RecName: Full=Probable serine/threonine-protein kinase PBL5 {ECO:0000305}; EC=2.7.11.1 {ECO:0000305}; AltName: Full=PBS1-like protein 5 {ECO:0000303|PubMed:20413097}; AltName: Full=Serine/threonine-protein kinase RLCKVII {ECO:0000305};	SubName: Full=Uncharacterized protein {ECO:0000313|EMBL:KNA06970.1};	Serine/threonine protein kinase	GO:0005886,plasma membrane; GO:0005524,ATP binding; GO:0004675,transmembrane receptor protein serine/threonine kinase activity; GO:0007166,cell surface receptor signaling pathway; GO:0006952,defense response; GO:0006468,protein phosphorylation	Protein kinase domain
gene-LOC110684712	0.09	0.05	0.1	12.96	9.46	7.39	2	1	2	265	218	146	0.008	-6.995	5.9317e-22	5.19965e-19	down	NW_018743742.1	415001	417536	+	LOC110684712	--	K00549 5-methyltetrahydropteroyltriglutamate--homocysteine methyltransferase [EC:2.1.1.14] | (RefSeq) 5-methyltetrahydropteroyltriglutamate--homocysteine methyltransferase (A)	uncharacterized protein LOC110684712 [Chenopodium quinoa]	RecName: Full=5-methyltetrahydropteroyltriglutamate--homocysteine methyltransferase; EC=2.1.1.14; AltName: Full=Cobalamin-independent methionine synthase isozyme; AltName: Full=Vitamin-B12-independent methionine synthase isozyme;	SubName: Full=Methionine synthase {ECO:0000313|EMBL:BAE07181.1};	Methionine synthase II (cobalamin-independent)	GO:0005737,cytoplasm; GO:0003871,5-methyltetrahydropteroyltriglutamate-homocysteine S-methyltransferase activity; GO:0008270,zinc ion binding; GO:0009086,methionine biosynthetic process	Cobalamin-independent synthase, Catalytic domain
gene-LOC110684726	1.14	0.9	1.1	1.91	2.59	1.95	103	80	88	161	246	159	0.47	-1.091	0.000942665	0.0244793	down	NW_018743754.1	61031	72902	-	LOC110684726	--	--	uncharacterized protein LOC110684726 [Chenopodium quinoa]	--	SubName: Full=Uncharacterized protein {ECO:0000313|EMBL:KNA17830.1};	--	GO:0016021,integral component of membrane	CemA family
gene-LOC110684752	1.21	2.67	1.65	0.24	0.02	0	49	106	59	9	1	0	21.204	4.406	3.41011e-07	3.27698e-05	up	NW_018742275.1	557055	561299	-	LOC110684752	--	K01193 beta-fructofuranosidase [EC:3.2.1.26] | (RefSeq) LOC109747879; beta-fructofuranosidase, insoluble isoenzyme 3-like (A)	UPF0481 protein At3g47200-like [Chenopodium quinoa]	RecName: Full=UPF0481 protein At3g47200;	SubName: Full=Uncharacterized protein {ECO:0000313|EMBL:KNA18694.1};	--	GO:0016021,integral component of membrane; GO:0005886,plasma membrane	Plant protein of unknown function
gene-LOC110684823	0.35	0.25	0.24	0.35	1.28	3.88	13	9	8	12	50	130	0.143	-2.803	0.00123242	0.0297469	down	NW_018743783.1	2058470	2062588	+	LOC110684823	--	--	--	--	--	--	--	--
gene-LOC110684906	0.9	1.69	1.88	0	0	0	19	35	35	0	0	0	155.673	7.282	1.31161e-07	1.37834e-05	up	NW_018743787.1	416103	419112	-	LOC110684906	--	--	--	--	--	--	--	--
gene-LOC110684923	0.09	0.27	0.22	0.76	0.78	0.67	13	38	28	103	119	88	0.244	-2.035	1.60605e-06	0.000130591	down	NW_018743787.1	2533682	2548113	-	LOC110684923	--	K03549 KUP system potassium uptake protein | (RefSeq) potassium transporter 19-like (A)	uncharacterized protein LOC110684923 isoform X1 [Chenopodium quinoa]	--	SubName: Full=Uncharacterized protein {ECO:0000313|EMBL:PKA45796.1};	--	--	Transposase-associated domain
gene-LOC110684941	0	0	0.09	1.83	0.54	0.45	0	0	1	21	7	5	0.033	-4.928	0.0025913	0.0492757	down	NW_018743788.1	8453	11894	+	LOC110684941	--	--	uncharacterized protein LOC110738007 [Chenopodium quinoa]	--	SubName: Full=Uncharacterized protein {ECO:0000313|EMBL:KNA08153.1};	--	--	--
gene-LOC110685022	1.68	4.56	0.07	2.74	34.34	245.69	29	77	1	44	621	3808	0.02	-5.66	0.00152311	0.0343847	down	NW_018743791.1	731573	732418	+	LOC110685022	--	K13449 pathogenesis-related protein 1 | (RefSeq) pathogenesis-related protein PR-1 type-like (A)	pathogenesis-related protein PR-1 type-like [Chenopodium quinoa]	RecName: Full=Pathogenesis-related protein PR-1 type; Flags: Precursor;	SubName: Full=Uncharacterized protein {ECO:0000313|EMBL:KNA21092.1};	Defense-related protein containing SCP domain	GO:0005576,extracellular region; GO:0006952,defense response; GO:0009607,response to biotic stimulus	Cysteine-rich secretory protein family
gene-LOC110685049	8.85	9.25	3.98	16.63	14.88	27.57	212	217	84	371	374	594	0.359	-1.477	0.000612373	0.0179595	down	NW_018743791.1	987604	990309	-	LOC110685049	--	--	CASP-like protein XL3 [Chenopodium quinoa]	RecName: Full=CASP-like protein XL3; AltName: Full=CASP-like protein 2C1; Short=GhCASPL2C1;	RecName: Full=CASP-like protein {ECO:0000256|RuleBase:RU361233};	--	GO:0016021,integral component of membrane; GO:0005886,plasma membrane	Domain of unknown function (DUF588)
gene-LOC110685064	24.13	38.56	42.03	22.12	13.61	12.25	1244	1947	1909	1062	736	568	2.119	1.083	6.90675e-05	0.00330091	up	NW_018743791.1	1118438	1122379	-	LOC110685064	--	K04043 molecular chaperone DnaK | (RefSeq) heat shock 70 kDa protein, mitochondrial-like (A)	heat shock 70 kDa protein, mitochondrial-like [Chenopodium quinoa]	RecName: Full=Heat shock 70 kDa protein, mitochondrial; Flags: Precursor;	SubName: Full=Heat shock 70 protein {ECO:0000313|EMBL:AAB96660.1};	Molecular chaperones mortalin/PBP74/GRP75, HSP70 superfamily	GO:0005739,mitochondrion; GO:0005524,ATP binding; GO:0051082,unfolded protein binding; GO:0006457,protein folding	Hsp70 protein
gene-LOC110685368	9.45	16.19	21.08	10.68	4.39	3.95	774	1299	1522	815	377	291	2.422	1.276	0.00165734	0.0366101	up	NW_018743812.1	818186	823795	+	LOC110685368	--	K01955 carbamoyl-phosphate synthase large subunit [EC:6.3.5.5] | (RefSeq) carbamoyl-phosphate synthase large chain, chloroplastic-like (A)	carbamoyl-phosphate synthase large chain, chloroplastic-like [Chenopodium quinoa]	RecName: Full=Carbamoyl-phosphate synthase large chain, chloroplastic; EC=6.3.5.5; AltName: Full=Carbamoyl-phosphate synthetase ammonia chain; AltName: Full=Protein VENOSA 6; Flags: Precursor;	SubName: Full=Uncharacterized protein {ECO:0000313|EMBL:KNA17608.1};	Multifunctional pyrimidine synthesis protein CAD (includes carbamoyl-phophate synthetase, aspartate transcarbamylase, and glutamine amidotransferase)	GO:0005951,carbamoyl-phosphate synthase complex; GO:0009507,chloroplast; GO:0009570,chloroplast stroma; GO:0016020,membrane; GO:0005524,ATP binding; GO:0004087,carbamoyl-phosphate synthase (ammonia) activity; GO:0004088,carbamoyl-phosphate synthase (glutamine-hydrolyzing) activity; GO:0046872,metal ion binding; GO:0044205,'de novo' UMP biosynthetic process; GO:0006526,arginine biosynthetic proces…	Carbamoyl-phosphate synthase L chain, ATP binding domain
gene-LOC110685369	0.54	3.4	0.73	10.09	5.99	19.05	30	186	36	525	351	957	0.121	-3.052	3.77871e-06	0.000280014	down	NW_018743812.1	829561	837200	+	LOC110685369	--	K18696 glycerophosphodiester phosphodiesterase [EC:3.1.4.46] | (RefSeq) glycerophosphocholine phosphodiesterase GDE1-like (A)	SPX domain-containing membrane protein At4g22990-like isoform X1 [Chenopodium quinoa]	RecName: Full=SPX domain-containing membrane protein At4g22990;	SubName: Full=Uncharacterized protein {ECO:0000313|EMBL:KNA17609.1};	Predicted transporter/transmembrane protein	GO:0016021,integral component of membrane; GO:0055085,transmembrane transport	Major Facilitator Superfamily
gene-LOC110685432	0.61	1.67	1.25	0.11	0.24	0.26	31	83	56	5	13	12	5.303	2.407	8.51003e-05	0.00388628	up	NW_018743813.1	2886328	2890796	+	LOC110685432	--	--	--	--	--	--	--	--
gene-LOC110685471	0.55	0.56	0.58	1.41	1.86	1.46	13	13	12	31	46	31	0.342	-1.548	0.0024147	0.0470886	down	NW_018743814.1	238663	245714	+	LOC110685471	--	--	--	--	--	--	--	--
gene-LOC110685759	4.57	2.94	3.83	10.65	25.87	24.32	65	41	48	141	386	311	0.178	-2.493	1.9319e-07	1.91802e-05	down	NW_018743850.1	184405	185488	+	LOC110685759	--	--	phytosulfokines 3-like [Chenopodium quinoa]	RecName: Full=Phytosulfokines 3; Short=AtPSK3; Contains: RecName: Full=Phytosulfokine-alpha; Short=PSK-alpha; Short=Phytosulfokine-a; Contains: RecName: Full=Phytosulfokine-beta; Short=PSK-beta; Short=Phytosulfokine-b; Flags: Precursor;	SubName: Full=Phytosulfokine-alpha peptide {ECO:0000313|EMBL:CAK22422.1};	--	GO:0031012,extracellular matrix; GO:0005794,Golgi apparatus; GO:0008083,growth factor activity; GO:0030154,cell differentiation; GO:0008283,cell proliferation; GO:0007275,multicellular organism development	Phytosulfokine precursor protein (PSK)
gene-LOC110685795	5.13	7.31	9.48	4.3	3.05	3.16	159	222	259	124	99	88	2.016	1.011	0.000735983	0.0205526	up	NW_018743850.1	520550	526237	-	LOC110685795	--	K14574 ribosome maturation protein SDO1 | (RefSeq) 50S ribosomal protein L2 (A)	uncharacterized protein LOC110685795 [Chenopodium quinoa]	RecName: Full=60S ribosomal protein L2, mitochondrial;	SubName: Full=Uncharacterized protein {ECO:0000313|EMBL:KNA20292.1};	Mitochondrial/chloroplast ribosomal protein L2	GO:0005762,mitochondrial large ribosomal subunit; GO:0005739,mitochondrion; GO:0003729,mRNA binding; GO:0003735,structural constituent of ribosome; GO:0032543,mitochondrial translation	Ribosomal Proteins L2, RNA binding domain
gene-LOC110685824	0.07	0.09	0.07	0	0	0	7	9	7	0	0	0	40.221	5.33	0.00225674	0.0450345	up	NW_018743850.1	785848	792003	+	LOC110685824	--	K17086 transmembrane 9 superfamily member 2/4 | (RefSeq) uncharacterized LOC101300290 (A)	uncharacterized protein LOC110685824 isoform X1 [Chenopodium quinoa]	--	SubName: Full=Uncharacterized protein {ECO:0000313|EMBL:EMJ12535.1}; Flags: Fragment;	--	GO:0003677,DNA binding; GO:0004803,transposase activity; GO:0008270,zinc ion binding; GO:0006313,transposition, DNA-mediated	MULE transposase domain
gene-LOC110685825	5.92	4.34	3.67	13.16	7.01	10.08	284	204	155	588	353	435	0.458	-1.125	0.000756458	0.0210101	down	NW_018743850.1	793242	797537	+	LOC110685825	--	--	uncharacterized protein LOC110685825 [Chenopodium quinoa]	--	SubName: Full=Uncharacterized protein {ECO:0000313|EMBL:KNA02652.1};	--	GO:0016021,integral component of membrane	--
gene-LOC110685921	4.82	7.48	13.07	2.88	0.76	0.68	230	349	549	128	38	29	5.903	2.561	5.76844e-06	0.000401779	up	NW_018743850.1	2252115	2259289	+	LOC110685921	--	K02945 small subunit ribosomal protein S1 | (RefSeq) uncharacterized protein LOC110685921 isoform X1 (A)	uncharacterized protein LOC110685921 isoform X1 [Chenopodium quinoa]	RecName: Full=30S ribosomal protein S1, chloroplastic {ECO:0000303|PubMed:10874039}; AltName: Full=CS1; AltName: Full=Chloroplastic small ribosomal subunit protein bS1c {ECO:0000303|PubMed:28007896}; Flags: Precursor;	SubName: Full=Uncharacterized protein {ECO:0000313|EMBL:KNA19506.1};	--	GO:0009507,chloroplast; GO:0005840,ribosome; GO:0003723,RNA binding	S1 RNA binding domain
gene-LOC110685922	0.23	0.48	0.24	2.84	3.14	3.41	9	18	8	102	127	118	0.096	-3.385	1.09465e-14	3.93419e-12	down	NW_018743850.1	2307007	2313794	+	LOC110685922	--	K02945 small subunit ribosomal protein S1 | (RefSeq) uncharacterized protein LOC110685922 isoform X1 (A)	uncharacterized protein LOC110685922 isoform X1 [Chenopodium quinoa]	RecName: Full=30S ribosomal protein S1, chloroplastic {ECO:0000303|PubMed:10874039}; AltName: Full=CS1; AltName: Full=Chloroplastic small ribosomal subunit protein bS1c {ECO:0000303|PubMed:28007896}; Flags: Precursor;	SubName: Full=Uncharacterized protein {ECO:0000313|EMBL:KNA19506.1};	--	GO:0009507,chloroplast; GO:0005840,ribosome; GO:0003723,RNA binding	S1 RNA binding domain
gene-LOC110685976	0.4	0.59	0.45	0.96	0.98	1.98	33	47	32	73	84	145	0.347	-1.528	0.000815695	0.0221087	down	NW_018743850.1	3438413	3448223	+	LOC110685976	--	K01595 phosphoenolpyruvate carboxylase [EC:4.1.1.31] | (RefSeq) phosphoenolpyruvate carboxylase 4-like (A)	phosphoenolpyruvate carboxylase 4-like [Chenopodium quinoa]	RecName: Full=Phosphoenolpyruvate carboxylase 4; Short=AtPPC4; Short=PEPC 4; Short=PEPCase 4; EC=4.1.1.31;	SubName: Full=Uncharacterized protein {ECO:0000313|EMBL:KNA22909.1};	--	GO:0005829,cytosol; GO:0008964,phosphoenolpyruvate carboxylase activity; GO:0015977,carbon fixation; GO:0015979,photosynthesis; GO:0006099,tricarboxylic acid cycle	Phosphoenolpyruvate carboxylase
gene-LOC110686052	128.42	134.73	209.15	90.54	82.26	48.64	7404	7607	10623	4860	4974	2521	2.075	1.053	0.000662722	0.0189636	up	NW_018743850.1	5142459	5150259	-	LOC110686052	--	K09487 heat shock protein 90kDa beta | (RefSeq) heat shock protein 90-5, chloroplastic-like (A)	heat shock protein 90-5, chloroplastic-like [Chenopodium quinoa]	RecName: Full=Heat shock protein 90-5, chloroplastic {ECO:0000305}; Short=AtHSP90.5 {ECO:0000305}; Short=AtHsp90-5 {ECO:0000303|PubMed:11599565}; AltName: Full=Heat shock protein 88-1 {ECO:0000305}; Short=Hsp88-1 {ECO:0000303|PubMed:11599565}; AltName: Full=Hsp90C {ECO:0000303|PubMed:23382192}; AltName: Full=Protein EMBRYO DEFECTIVE 1956 {ECO:0000303|PubMed:23382192}; AltName: Full=Protein chlora…	SubName: Full=Uncharacterized protein {ECO:0000313|EMBL:KNA16992.1};	Molecular chaperone (HSP90 family)	GO:0009507,chloroplast; GO:0009941,chloroplast envelope; GO:0009570,chloroplast stroma; GO:0005739,mitochondrion; GO:0009536,plastid; GO:0005774,vacuolar membrane; GO:0005524,ATP binding; GO:0042803,protein homodimerization activity; GO:0051082,unfolded protein binding; GO:0009704,de-etiolation; GO:0006457,protein folding; GO:0045037,protein import into chloroplast stroma; GO:0010157,response to …	Hsp90 protein
gene-LOC110686094	4.1	2.66	2.81	15.9	13.05	24.79	154	98	93	556	514	837	0.174	-2.523	4.29285e-11	9.1293e-09	down	NW_018743850.1	5926138	5929852	-	LOC110686094	--	--	PI-PLC X domain-containing protein At5g67130-like [Chenopodium quinoa]	RecName: Full=PI-PLC X domain-containing protein At5g67130; Flags: Precursor;	SubName: Full=Uncharacterized protein {ECO:0000313|EMBL:KNA14666.1};	--	GO:0046658,anchored component of plasma membrane; GO:0005886,plasma membrane; GO:0008081,phosphoric diester hydrolase activity; GO:0006629,lipid metabolic process	Avian retrovirus envelope protein, gp85
gene-LOC110686114	7.04	5.6	5.13	2.81	1.77	3.27	299	233	192	111	79	125	2.222	1.152	0.000932999	0.0243369	up	NW_018743850.1	6221594	6228747	-	LOC110686114	--	--	--	--	--	--	--	--
gene-LOC110686175	1.66	1.34	1.43	19.57	10	10.5	62	49	47	679	391	352	0.11	-3.18	5.81896e-22	5.19965e-19	down	NW_018743850.1	7154252	7157696	-	LOC110686175	--	--	sulfite exporter TauE/SafE family protein 3-like [Chenopodium quinoa]	RecName: Full=Sulfite exporter TauE/SafE family protein 3 {ECO:0000312|EMBL:AEC07746.1};	SubName: Full=Uncharacterized protein {ECO:0000313|EMBL:KNA17059.1};	--	GO:0016021,integral component of membrane	Sulfite exporter TauE/SafE
gene-LOC110686206	1.73	3.29	1.26	8.26	5.87	4.95	86	160	55	382	306	221	0.316	-1.66	1.03068e-05	0.000659123	down	NW_018743850.1	7511782	7516011	-	LOC110686206	--	K00889 1-phosphatidylinositol-4-phosphate 5-kinase [EC:2.7.1.68] | (RefSeq) phosphatidylinositol 4-phosphate 5-kinase 6-like (A)	protein ACCELERATED CELL DEATH 6-like isoform X1 [Chenopodium quinoa]	RecName: Full=Protein ACCELERATED CELL DEATH 6 {ECO:0000303|PubMed:10488236};	SubName: Full=Uncharacterized protein {ECO:0000313|EMBL:KNA14727.1};	FOG: Ankyrin repeat	GO:0030176,integral component of endoplasmic reticulum membrane; GO:0005887,integral component of plasma membrane; GO:0016020,membrane; GO:0008219,cell death; GO:0071446,cellular response to salicylic acid stimulus; GO:0009816,defense response to bacterium, incompatible interaction; GO:1900426,positive regulation of defense response to bacterium; GO:1902290,positive regulation of defense response…	Ankyrin repeats (3 copies)
gene-LOC110686215	1.93	3.1	1.83	7.04	5.79	7.62	85	134	71	289	268	302	0.321	-1.641	9.3945e-09	1.23677e-06	down	NW_018743850.1	7582761	7587513	-	LOC110686215	--	K23677 MFS transporter, Spinster family, sphingosine-1-phosphate transporter | (RefSeq) uncharacterized LOC105802280 (A)	uncharacterized protein LOC110686215 [Chenopodium quinoa]	--	SubName: Full=Uncharacterized protein {ECO:0000313|EMBL:KNA15820.1};	Sugar transporter/spinster transmembrane protein	GO:0016021,integral component of membrane; GO:0055085,transmembrane transport	Major Facilitator Superfamily
gene-LOC110686498	0.28	0.26	0.17	0.46	0.73	0.63	30	27	16	46	82	61	0.371	-1.429	0.00247487	0.0478466	down	NW_018743863.1	496185	504549	-	LOC110686498	--	--	--	--	--	--	--	--
gene-LOC110686510	3.25	3.51	1.89	6.47	7.75	9.72	117	124	60	217	293	315	0.346	-1.532	3.16852e-05	0.00174926	down	NW_018743863.1	1490110	1495776	+	LOC110686510	--	K13416 brassinosteroid insensitive 1-associated receptor kinase 1 [EC:2.7.10.1 2.7.11.1] | (RefSeq) hypothetical protein (A)	cold-responsive protein kinase 1-like [Chenopodium quinoa]	RecName: Full=Cold-responsive protein kinase 1 {ECO:0000303|PubMed:28344081}; EC=2.7.11.1 {ECO:0000255|PROSITE-ProRule:PRU00159, ECO:0000269|PubMed:28344081};	SubName: Full=Uncharacterized protein {ECO:0000313|EMBL:OAY28896.1};	Serine/threonine protein kinase	GO:0005886,plasma membrane; GO:0005524,ATP binding; GO:0004674,protein serine/threonine kinase activity; GO:0033160,positive regulation of protein import into nucleus, translocation; GO:0046777,protein autophosphorylation; GO:0009409,response to cold; GO:0050826,response to freezing; GO:0009625,response to insect; GO:0002237,response to molecule of bacterial origin	Protein kinase domain
gene-LOC110686597	2.31	1.63	1.42	0.54	0.3	0.59	74	51	40	16	10	17	3.73	1.899	0.000297756	0.0103697	up	NW_018743884.1	4301	9147	-	LOC110686597	--	K10572 inositol-pentakisphosphate 2-kinase [EC:2.7.1.158] | (RefSeq) LOW QUALITY PROTEIN: inositol-pentakisphosphate 2-kinase-like (A)	LOW QUALITY PROTEIN: inositol-pentakisphosphate 2-kinase-like [Chenopodium quinoa]	RecName: Full=Inositol-pentakisphosphate 2-kinase; EC=2.7.1.158; AltName: Full=Inositol-1,3,4,5,6-pentakisphosphate 2-kinase; AltName: Full=Ins(1,3,4,5,6)P5 2-kinase; Short=AtIPK1; Short=InsP5 2-kinase;	RecName: Full=Inositol-pentakisphosphate 2-kinase {ECO:0000256|RuleBase:RU364126}; EC=2.7.1.158 {ECO:0000256|RuleBase:RU364126};	Inositol polyphosphate kinase	GO:0005737,cytoplasm; GO:0005634,nucleus; GO:0005524,ATP binding; GO:0035299,inositol pentakisphosphate 2-kinase activity; GO:0032942,inositol tetrakisphosphate 2-kinase activity; GO:0046872,metal ion binding; GO:0030643,cellular phosphate ion homeostasis; GO:0042742,defense response to bacterium; GO:0050832,defense response to fungus; GO:0051607,defense response to virus; GO:0040007,growth; GO:0…	Inositol-pentakisphosphate 2-kinase
gene-LOC110686624	0.31	0.38	1	3.43	1.55	3.49	5	6	14	51	26	50	0.193	-2.377	0.000363487	0.0121185	down	NW_018743893.1	26876	33042	+	LOC110686624	--	K03676 glutaredoxin 3 | (RefSeq) glutaredoxin-like (A)	glutaredoxin-like [Chenopodium quinoa]	RecName: Full=Glutaredoxin;	SubName: Full=Uncharacterized protein {ECO:0000313|EMBL:KNA14879.1};	Glutaredoxin and related proteins	GO:0005737,cytoplasm; GO:0009055,electron transfer activity; GO:0015035,protein disulfide oxidoreductase activity; GO:0045454,cell redox homeostasis	Glutaredoxin
gene-LOC110686637	2.92	2.39	2.37	0	0	0	35	28	25	0	0	0	155.698	7.283	9.59166e-08	1.04779e-05	up	NW_018743893.1	268876	269777	+	LOC110686637	--	--	--	--	--	--	--	--
gene-LOC110686656	5.82	4.05	2.36	5.26	18.4	17.04	229	156	82	193	760	603	0.285	-1.809	0.00141396	0.0326503	down	NW_018743893.1	462454	468473	-	LOC110686656	--	K13366 polyamine oxidase [EC:1.5.3.14 1.5.3.16 1.5.3.-] | (RefSeq) polyamine oxidase-like (A)	polyamine oxidase-like [Chenopodium quinoa]	RecName: Full=Polyamine oxidase; EC=1.5.3.14; EC=1.5.3.15; Flags: Precursor;	SubName: Full=Polyamine oxidase {ECO:0000313|EMBL:AAM43922.1}; EC=1.4.3.4 {ECO:0000313|EMBL:AAM43922.1};	Amine oxidase	GO:0052898,N1-acetylspermidine:oxygen oxidoreductase (propane-1,3-diamine-forming) activity; GO:0052893,N1-acetylspermine:oxygen oxidoreductase (propane-1,3-diamine-forming) activity; GO:0052897,N8-acetylspermidine:oxygen oxidoreductase (propane-1,3-diamine-forming) activity; GO:0052896,spermidine oxidase (propane-1,3-diamine-forming) activity; GO:0052900,spermine oxidase (propane-1,3-diamine-for…	Flavin containing amine oxidoreductase
gene-LOC110686667	4.58	2.69	1.36	4.85	21.42	7.55	349	201	91	344	1711	517	0.244	-2.034	0.00159596	0.0355823	down	NW_018743893.1	726263	733208	+	LOC110686667	--	K16055 trehalose 6-phosphate synthase/phosphatase [EC:2.4.1.15 3.1.3.12] | (RefSeq) probable alpha,alpha-trehalose-phosphate synthase [UDP-forming] 9 isoform X1 (A)	probable alpha,alpha-trehalose-phosphate synthase [UDP-forming]	RecName: Full=Probable alpha,alpha-trehalose-phosphate synthase [UDP-forming] 9; EC=2.4.1.15; AltName: Full=Trehalose-6-phosphate synthase 9; Short=AtTPS9;	SubName: Full=Uncharacterized protein {ECO:0000313|EMBL:KNA06858.1};	Trehalose-6-phosphate synthase component TPS1 and related subunits	GO:0005737,cytoplasm; GO:0016791,phosphatase activity; GO:0016757,transferase activity, transferring glycosyl groups; GO:0005992,trehalose biosynthetic process; GO:0070413,trehalose metabolism in response to stress	Glycosyltransferase family 20
gene-LOC110686689	4.49	6.97	9.76	3.44	0.74	0.59	213	324	408	152	37	25	4.515	2.175	0.000324178	0.0111599	up	NW_018743893.1	1017207	1027465	-	LOC110686689	--	K12862 pleiotropic regulator 1 | (RefSeq) uncharacterized protein LOC9311097 (A)	protease Do-like 9 [Chenopodium quinoa]	RecName: Full=Protease Do-like 9; EC=3.4.21.-;	SubName: Full=Uncharacterized protein {ECO:0000313|EMBL:KDP31134.1};	Serine protease	GO:0009507,chloroplast; GO:0005730,nucleolus; GO:0004252,serine-type endopeptidase activity	PDZ domain
gene-LOC110686737	71.13	80.98	48	169.78	164.16	102.52	1322	1474	786	2938	3200	1713	0.445	-1.168	8.74606e-05	0.00395886	down	NW_018743893.1	296882	297793	+	LOC110686737	--	--	uncharacterized protein LOC110686737 [Chenopodium quinoa]	--	SubName: Full=Uncharacterized protein {ECO:0000313|EMBL:KNA25044.1};	--	--	Protein of unknown function (DUF1645)
gene-LOC110686951	3.07	3.38	5.38	1.22	0.6	1.79	103	111	159	38	21	54	3.176	1.667	0.000569168	0.0170466	up	NW_018743906.1	1566565	1568960	-	LOC110686951	--	--	uncharacterized protein LOC110686951 [Chenopodium quinoa]	--	SubName: Full=Uncharacterized protein {ECO:0000313|EMBL:KNA17450.1};	--	--	Protein of unknown function (DUF1685)
gene-LOC110686952	29.63	37.92	41.07	13.15	3.99	4.92	1239	1553	1513	512	175	185	4.93	2.302	7.73002e-09	1.05234e-06	up	NW_018743906.1	1650961	1653012	+	LOC110686952	--	K17193 anthocyanidin 3-O-glucoside 2'''-O-xylosyltransferase [EC:2.4.2.51] | (RefSeq) UDP-glycosyltransferase 79B6-like (A)	UDP-glycosyltransferase 79B6-like [Chenopodium quinoa]	RecName: Full=UDP-glycosyltransferase 79B6; EC=2.4.1.-;	SubName: Full=Uncharacterized protein {ECO:0000313|EMBL:KNA22368.1};	UDP-glucuronosyl and UDP-glucosyl transferase	GO:0043231,intracellular membrane-bounded organelle; GO:0080043,quercetin 3-O-glucosyltransferase activity; GO:0080044,quercetin 7-O-glucosyltransferase activity; GO:0035251,UDP-glucosyltransferase activity; GO:0008152,metabolic process	UDP-glucoronosyl and UDP-glucosyl transferase
gene-LOC110686969	9.3	4.96	7.28	13.35	20.39	53.04	161	84	111	215	370	825	0.238	-2.069	0.000272015	0.00974289	down	NW_018743906.1	2050869	2053592	+	LOC110686969	--	--	protein PLANT CADMIUM RESISTANCE 2-like [Chenopodium quinoa]	RecName: Full=Protein PLANT CADMIUM RESISTANCE 2; Short=AtPCR2;	SubName: Full=Uncharacterized protein {ECO:0000313|EMBL:KNA19790.1};	--	GO:0016021,integral component of membrane; GO:0005886,plasma membrane; GO:0006979,response to oxidative stress	PLAC8 family
gene-LOC110687162	0.02	0.05	0	0.08	0.67	1.15	1	2	0	3	30	44	0.035	-4.84	0.000420535	0.0136109	down	NW_018743919.1	1395844	1398760	-	LOC110687162	--	--	--	--	--	--	--	--
gene-LOC110687280	2.18	4.12	2.16	4.17	8.08	8.05	227	420	198	404	882	753	0.386	-1.374	0.000585324	0.0174105	down	NW_018743919.1	1345782	1368242	+	LOC110687280	--	K20606 mitogen-activated protein kinase kinase kinase ANP1 [EC:2.7.11.25] | (RefSeq) receptor-like serine/threonine-protein kinase SD1-7 isoform X1 (A)	putative receptor-like protein kinase At4g00960 isoform X2 [Chenopodium quinoa]	RecName: Full=Cysteine-rich receptor-like protein kinase 10; Short=Cysteine-rich RLK10; EC=2.7.11.-; AltName: Full=Receptor-like protein kinase 4; Flags: Precursor;	SubName: Full=Uncharacterized protein {ECO:0000313|EMBL:ESW15154.1};	--	GO:0016021,integral component of membrane; GO:0005886,plasma membrane; GO:0005524,ATP binding; GO:0004674,protein serine/threonine kinase activity; GO:0042742,defense response to bacterium; GO:0006468,protein phosphorylation	Protein kinase domain
gene-LOC110687281	0.2	0.43	0.51	1.13	2.91	2.79	9	19	20	47	136	112	0.154	-2.698	3.4712e-06	0.000260994	down	NW_018743919.1	1392851	1395603	+	LOC110687281	--	K20606 mitogen-activated protein kinase kinase kinase ANP1 [EC:2.7.11.25] | (RefSeq) receptor-like serine/threonine-protein kinase SD1-7 isoform X1 (A)	putative receptor-like protein kinase At4g00960 [Chenopodium quinoa]	RecName: Full=Cysteine-rich receptor-like protein kinase 8; Short=Cysteine-rich RLK8; EC=2.7.11.-; Flags: Precursor;	SubName: Full=Uncharacterized protein {ECO:0000313|EMBL:ESW15165.1};	--	GO:0016021,integral component of membrane; GO:0005886,plasma membrane; GO:0005524,ATP binding; GO:0004674,protein serine/threonine kinase activity; GO:0042742,defense response to bacterium; GO:0006468,protein phosphorylation	Protein kinase domain
gene-LOC110687282	1.37	1.9	0.63	3.14	5.23	4.66	67	91	27	143	268	205	0.282	-1.825	9.77585e-05	0.00430628	down	NW_018743919.1	1357320	1360282	+	LOC110687282	--	K20606 mitogen-activated protein kinase kinase kinase ANP1 [EC:2.7.11.25] | (RefSeq) receptor-like serine/threonine-protein kinase SD1-7 isoform X1 (A)	putative receptor-like protein kinase At4g00960 [Chenopodium quinoa]	RecName: Full=Cysteine-rich receptor-like protein kinase 8; Short=Cysteine-rich RLK8; EC=2.7.11.-; Flags: Precursor;	SubName: Full=Uncharacterized protein {ECO:0000313|EMBL:ESW15197.1};	--	GO:0016021,integral component of membrane; GO:0005886,plasma membrane; GO:0005524,ATP binding; GO:0004674,protein serine/threonine kinase activity; GO:0042742,defense response to bacterium; GO:0006468,protein phosphorylation	Protein kinase domain
gene-LOC110687286	2.85	3.88	2.42	11.7	11.76	8.13	135	180	101	516	584	346	0.279	-1.843	2.3471e-11	5.14358e-09	down	NW_018743919.1	1376228	1379292	+	LOC110687286	--	--	--	--	--	--	--	--
gene-LOC110687300	1.95	2.44	1.67	5.16	5.79	7.41	110	135	83	271	343	376	0.315	-1.669	3.94037e-08	4.65845e-06	down	NW_018743919.1	1830377	1834642	-	LOC110687300	--	K06883 uncharacterized protein | (RefSeq) LOW QUALITY PROTEIN: uncharacterized protein LOC104799061 (A)	cysteine-rich receptor-like protein kinase 25 [Chenopodium quinoa]	RecName: Full=Cysteine-rich receptor-like protein kinase 25; Short=Cysteine-rich RLK25; EC=2.7.11.-; Flags: Precursor;	SubName: Full=Uncharacterized protein {ECO:0000313|EMBL:KDO37422.1};	--	GO:0016021,integral component of membrane; GO:0005886,plasma membrane; GO:0005524,ATP binding; GO:0004674,protein serine/threonine kinase activity; GO:0042742,defense response to bacterium; GO:0006468,protein phosphorylation	Protein tyrosine kinase
gene-LOC110687356	22.8	36.75	23.8	39.04	56.05	64.64	1011	1596	930	1612	2607	2577	0.489	-1.032	0.000922646	0.0241163	down	NW_018743919.1	2432090	2439663	+	LOC110687356	--	K09015 Fe-S cluster assembly protein SufD | (RefSeq) protein ABCI7, chloroplastic (A)	UPF0051 protein ABCI8, chloroplastic-like [Chenopodium quinoa]	RecName: Full=UPF0051 protein ABCI8, chloroplastic; AltName: Full=ABC transporter I family member 8; Short=ABC transporter ABCI.8; Short=AtABCI8; AltName: Full=Non-intrinsic ABC protein 1; Short=Protein ABC1; AltName: Full=Plastid sufB-like protein; AltName: Full=Protein LONG AFTER FAR-RED 6; Flags: Precursor;	SubName: Full=Uncharacterized protein {ECO:0000313|EMBL:KNA18718.1};	--	GO:0009507,chloroplast; GO:0009570,chloroplast stroma; GO:0042626,ATPase activity, coupled to transmembrane movement of substances; GO:0005215,transporter activity; GO:0006879,cellular iron ion homeostasis; GO:0016226,iron-sulfur cluster assembly; GO:2000030,regulation of response to red or far red light	Uncharacterized protein family (UPF0051)
gene-LOC110687362	7.41	7.78	9.16	19.25	15.35	16.64	358	368	390	866	778	723	0.461	-1.118	3.61556e-09	5.30381e-07	down	NW_018743919.1	2527841	2544969	+	LOC110687362	--	K03327 multidrug resistance protein, MATE family | (RefSeq) protein DETOXIFICATION 40-like isoform X1 (A)	protein DETOXIFICATION 40-like isoform X1 [Chenopodium quinoa]	RecName: Full=Protein DETOXIFICATION 40 {ECO:0000303|PubMed:11739388}; Short=AtDTX40 {ECO:0000303|PubMed:11739388}; AltName: Full=Multidrug and toxic compound extrusion protein 40 {ECO:0000305}; Short=MATE protein 40 {ECO:0000305};	RecName: Full=Protein DETOXIFICATION {ECO:0000256|RuleBase:RU004914}; AltName: Full=Multidrug and toxic compound extrusion protein {ECO:0000256|RuleBase:RU004914};	Uncharacterized membrane protein, predicted efflux pump	GO:0016021,integral component of membrane; GO:0005774,vacuolar membrane; GO:0005773,vacuole; GO:0015297,antiporter activity; GO:0015238,drug transmembrane transporter activity; GO:0006855,drug transmembrane transport	MatE
gene-LOC110687395	1.43	1.36	0.64	2.4	2.61	8.48	76	71	30	119	146	406	0.242	-2.049	0.00070045	0.0198534	down	NW_018743919.1	3045291	3049145	-	LOC110687395	--	K13424 WRKY transcription factor 33 | (RAP-DB) Os05g0474800, WRKY70, WRKY_GENE_70; WRKY transcription factor 70. (A)	probable WRKY transcription factor 31 [Chenopodium quinoa]	RecName: Full=WRKY transcription factor 42 {ECO:0000303|Ref.1}; AltName: Full=WRKY DNA-binding protein 42 {ECO:0000303|Ref.1};	SubName: Full=Uncharacterized protein {ECO:0000313|EMBL:KNA25077.1};	--	GO:0005634,nucleus; GO:0003700,DNA-binding transcription factor activity; GO:0043565,sequence-specific DNA binding; GO:0044212,transcription regulatory region DNA binding; GO:0045892,negative regulation of transcription, DNA-templated; GO:0006351,transcription, DNA-templated	WRKY DNA -binding domain
gene-LOC110687452	1.78	2.45	1.41	3.61	10.9	7.52	89	120	62	168	571	338	0.238	-2.072	1.58517e-05	0.000968896	down	NW_018743919.1	3894093	3900653	+	LOC110687452	--	K14445 solute carrier family 13 (sodium-dependent dicarboxylate transporter), member 2/3/5 | (RefSeq) tonoplast dicarboxylate transporter-like (A)	tonoplast dicarboxylate transporter-like [Chenopodium quinoa]	RecName: Full=Tonoplast dicarboxylate transporter; Short=AttDT; AltName: Full=Sodium-dicarboxylate cotransporter-like; Short=AtSDAT; AltName: Full=Vacuolar malate transporter;	SubName: Full=Uncharacterized protein {ECO:0000313|EMBL:KNA24065.1};	Na+/dicarboxylate, Na+/tricarboxylate and phosphate transporters	GO:0016021,integral component of membrane; GO:0005774,vacuolar membrane; GO:0005773,vacuole; GO:0015140,malate transmembrane transporter activity; GO:0015743,malate transport; GO:0051453,regulation of intracellular pH; GO:0006814,sodium ion transport	Sodium:sulfate symporter transmembrane region
gene-LOC110687487	4.32	18.03	4.16	31.24	75.03	45.1	152	621	129	1023	2768	1426	0.157	-2.668	3.61486e-06	0.00026954	down	NW_018743919.1	4263536	4268073	+	LOC110687487	--	K07213 copper chaperone | (RefSeq) copper transport protein ATX1-like (A)	heavy metal-associated isoprenylated plant protein 7-like [Chenopodium quinoa]	RecName: Full=Heavy metal-associated isoprenylated plant protein 7 {ECO:0000303|PubMed:21072340, ECO:0000303|PubMed:23368984}; Short=AtHIP07 {ECO:0000303|PubMed:21072340, ECO:0000303|PubMed:23368984}; AltName: Full=Farnesylated protein 3 {ECO:0000303|PubMed:8837031}; Short=AtFP3 {ECO:0000303|PubMed:8837031}; Flags: Precursor;	SubName: Full=Uncharacterized protein {ECO:0000313|EMBL:KNA08047.1};	Copper chaperone	GO:0005737,cytoplasm; GO:0005886,plasma membrane; GO:0046914,transition metal ion binding; GO:0046916,cellular transition metal ion homeostasis; GO:0030001,metal ion transport	Heavy-metal-associated domain
gene-LOC110687517	17.38	12.39	11.71	19.09	47.91	34.06	976	681	579	998	2821	1719	0.392	-1.352	0.00155943	0.035026	down	NW_018743919.1	4855507	4859254	+	LOC110687517	--	--	--	--	--	--	--	--
gene-LOC110687597	2.91	0.99	0.62	2.35	10.53	9.57	69	23	13	52	262	204	0.196	-2.351	0.00186012	0.0395111	down	NW_018743920.1	2383379	2384542	+	LOC110687597	--	K02723 photosystem II PsbY protein | (RefSeq) photosystem II core complex proteins psbY, chloroplastic-like (A)	photosystem II core complex proteins psbY, chloroplastic-like [Chenopodium quinoa]	RecName: Full=Photosystem II core complex proteins psbY, chloroplastic; AltName: Full=L-arginine-metabolizing enzyme; Short=L-AME; Contains: RecName: Full=Photosystem II protein psbY-1, chloroplastic; AltName: Full=psbY-A1; Contains: RecName: Full=Photosystem II protein psbY-2, chloroplastic; AltName: Full=psbY-A2; Flags: Precursor;	SubName: Full=Uncharacterized protein {ECO:0000313|EMBL:KNA05935.1};	--	GO:0009535,chloroplast thylakoid membrane; GO:0016021,integral component of membrane; GO:0009523,photosystem II; GO:0030145,manganese ion binding; GO:0015979,photosynthesis	Photosystem II protein Y (PsbY)
gene-LOC110687752	1.4	2.39	2.82	1.23	0.65	0.73	49	82	87	40	24	23	2.453	1.295	0.00261142	0.0495436	up	NW_018743920.1	395618	400431	-	LOC110687752	--	K14009 B-cell receptor-associated protein 31 | (RefSeq) B-cell receptor-associated protein 31-like (A)	B-cell receptor-associated protein 31-like [Chenopodium quinoa]	--	SubName: Full=Uncharacterized protein {ECO:0000313|EMBL:KNA21184.1};	B-cell receptor-associated protein and related proteins	GO:0005783,endoplasmic reticulum; GO:0016021,integral component of membrane; GO:0006886,intracellular protein transport	Protein of unknown function (DUF724)
gene-LOC110687774	0.39	0.72	0.36	2.57	2.26	1.08	16	29	13	99	98	40	0.238	-2.07	3.85862e-05	0.00206675	down	NW_018743920.1	580502	584190	-	LOC110687774	--	--	ninja-family protein AFP2-like [Chenopodium quinoa]	RecName: Full=Ninja-family protein AFP3; AltName: Full=ABI five-binding protein 3; Short=ABI5-binding protein 3;	SubName: Full=Uncharacterized protein {ECO:0000313|EMBL:KNA02670.1};	--	GO:0005634,nucleus; GO:0007165,signal transduction	TPL-binding domain in jasmonate signalling
gene-LOC110687876	9.48	11.33	12.8	4.43	3.42	3.73	487	570	579	212	184	172	2.809	1.49	2.37057e-13	7.47353e-11	up	NW_018743920.1	2343320	2350140	+	LOC110687876	--	K01376 UFM1-specific protease 2 [EC:3.4.22.-] | (RefSeq) probable Ufm1-specific protease (A)	probable Ufm1-specific protease [Chenopodium quinoa]	RecName: Full=Probable Ufm1-specific protease; Short=UfSP; EC=3.4.22.-;	SubName: Full=Uncharacterized protein {ECO:0000313|EMBL:KNA05939.1};	Uncharacterized conserved protein	GO:0071567,UFM1 hydrolase activity	Peptidase family C78
gene-LOC110687971	14.92	10.6	9.04	23.84	24.66	21.91	549	382	293	817	952	725	0.481	-1.056	0.000521792	0.0160935	down	NW_018743920.1	3428481	3432480	+	LOC110687971	--	K20285 Rab9 effector protein with kelch motifs | (RefSeq) rab9 effector protein with kelch motifs-like (A)	kelch repeat-containing protein At3g27220-like [Chenopodium quinoa]	RecName: Full=Kelch repeat-containing protein At3g27220;	SubName: Full=Uncharacterized protein {ECO:0000313|EMBL:KNA10430.1};	FOG: Kelch repeat	GO:0005737,cytoplasm; GO:0005768,endosome; GO:0005794,Golgi apparatus; GO:0016021,integral component of membrane; GO:0019005,SCF ubiquitin ligase complex; GO:0005802,trans-Golgi network; GO:0031625,ubiquitin protein ligase binding; GO:0009061,anaerobic respiration; GO:0043161,proteasome-mediated ubiquitin-dependent protein catabolic process; GO:0042787,NA; GO:0030162,regulation of proteolysis	Kelch motif
gene-LOC110687982	1.77	2.31	5.27	0	0	0	87	111	228	0	0	0	763.011	9.576	2.45027e-13	7.65762e-11	up	NW_018743920.1	3618623	3621212	+	LOC110687982	--	--	--	--	--	--	--	--
gene-LOC110688015	0.11	0.06	0	0.3	0.66	3.2	4	2	0	10	25	104	0.039	-4.683	7.92845e-05	0.00367202	down	NW_018743920.1	3997145	3998918	+	LOC110688015	--	K19038 E3 ubiquitin-protein ligase ATL41 [EC:2.3.2.27] | (RefSeq) E3 ubiquitin-protein ligase ATL41-like (A)	RING-H2 finger protein ATL60-like [Chenopodium quinoa]	RecName: Full=RING-H2 finger protein ATL3; EC=2.3.2.27 {ECO:0000305}; AltName: Full=RING-type E3 ubiquitin transferase ATL3 {ECO:0000305};	SubName: Full=Uncharacterized protein {ECO:0000313|EMBL:OAY36315.1};	FOG: Predicted E3 ubiquitin ligase	GO:0016021,integral component of membrane; GO:0046872,metal ion binding; GO:0061630,ubiquitin protein ligase activity; GO:0043161,proteasome-mediated ubiquitin-dependent protein catabolic process	Ring finger domain
gene-LOC110688036	53.45	30.72	51.39	14.05	14.43	17.15	915	515	775	224	259	264	2.905	1.539	6.69143e-06	0.000450356	up	NW_018743920.1	4265217	4266056	-	LOC110688036	--	K13448 calcium-binding protein CML | (RefSeq) probable calcium-binding protein CML44 (A)	uncharacterized protein LOC110688036 [Chenopodium quinoa]	--	SubName: Full=Uncharacterized protein {ECO:0000313|EMBL:KNA22656.1};	--	GO:0005509,calcium ion binding	EF-hand domain pair
gene-LOC110688044	18.1	4.92	4.12	48.8	64.8	15.14	319	85	64	801	1198	240	0.215	-2.216	0.00125235	0.0301293	down	NW_018743920.1	4372017	4373740	-	LOC110688044	--	K13993 HSP20 family protein | (RefSeq) 17.4 kDa class III heat shock protein-like (A)	17.4 kDa class III heat shock protein-like [Chenopodium quinoa]	RecName: Full=18.6 kDa class III heat shock protein; AltName: Full=18.6 kDa heat shock protein; Short=OsHsp18.6;	SubName: Full=Uncharacterized protein {ECO:0000313|EMBL:KNA07362.1};	Molecular chaperone (small heat-shock protein Hsp26/Hsp42)	GO:0005737,cytoplasm; GO:0009408,response to heat; GO:0009644,response to high light intensity; GO:0042542,response to hydrogen peroxide	Hsp20/alpha crystallin family
gene-LOC110688064	0	0	0	2.96	2.44	2.34	0	0	0	42	39	32	0.005	-7.712	4.39299e-09	6.34073e-07	down	NW_018743920.1	4668747	4672058	+	LOC110688064	--	--	--	--	--	--	--	--
gene-LOC110688093	2.61	3.62	3.28	0	0	0	142	193	157	0	0	0	860.256	9.749	1.57495e-15	6.28931e-13	up	NW_018743920.1	5220137	5227593	+	LOC110688093	--	K00423 L-ascorbate oxidase [EC:1.10.3.3] | (RefSeq) L-ascorbate oxidase (A)	F-box/FBD/LRR-repeat protein At5g53840-like [Chenopodium quinoa]	RecName: Full=Putative F-box/LRR-repeat protein At5g54820;	SubName: Full=Uncharacterized protein {ECO:0000313|EMBL:KMS95077.1};	--	--	F-box domain
gene-LOC110688094	2.11	2.71	3.25	0	0	0	92	116	125	0	0	0	586.729	9.197	1.50515e-13	4.78717e-11	up	NW_018743920.1	5243468	5247691	+	LOC110688094	--	--	uncharacterized protein LOC110688094 [Chenopodium quinoa]	--	--	--	--	--
gene-LOC110688095	0.22	0.26	0.43	0	0	0	17	20	30	0	0	0	119.058	6.896	1.51846e-06	0.000124597	up	NW_018743920.1	5274873	5278715	-	LOC110688095	--	--	--	--	--	--	--	--
gene-LOC110688096	5.52	6.14	6.04	0	0	0	215	234	207	0	0	0	1153.79	10.172	5.65917e-17	2.67619e-14	up	NW_018743920.1	5269106	5274644	+	LOC110688096	--	K00423 L-ascorbate oxidase [EC:1.10.3.3] | (RefSeq) L-ascorbate oxidase (A)	putative F-box/LRR-repeat protein At5g54820 [Chenopodium quinoa]	RecName: Full=Putative F-box/LRR-repeat protein At5g54820;	SubName: Full=Uncharacterized protein {ECO:0000313|EMBL:KMS95075.1};	--	--	F-box domain
gene-LOC110688104	0.26	0.19	0.17	1.57	0.82	1.29	7	5	4	39	23	31	0.168	-2.576	7.52623e-05	0.00351289	down	NW_018743920.1	5351436	5354319	-	LOC110688104	--	K13566 omega-amidase [EC:3.5.1.3] | (RefSeq) omega-amidase, chloroplastic-like isoform X1 (A)	omega-amidase, chloroplastic-like isoform X1 [Chenopodium quinoa]	RecName: Full=Omega-amidase, chloroplastic; EC=3.5.1.3 {ECO:0000269|PubMed:24461228}; AltName: Full=Nitrilase-like protein 3; Flags: Precursor;	SubName: Full=Uncharacterized protein {ECO:0000313|EMBL:KNA15309.1};	Carbon-nitrogen hydrolase	GO:0009507,chloroplast; GO:0009570,chloroplast stroma; GO:0005829,cytosol; GO:0050152,omega-amidase activity; GO:0008270,zinc ion binding; GO:0006108,malate metabolic process; GO:0006807,nitrogen compound metabolic process; GO:0006107,oxaloacetate metabolic process	Carbon-nitrogen hydrolase
gene-LOC110688136	0.24	0.22	0.29	0.4	1.07	2.65	11	10	12	17	52	110	0.171	-2.549	0.000919831	0.0240658	down	NW_018743920.1	5750000	5755101	-	LOC110688136	--	K00521 ferric-chelate reductase [EC:1.16.1.7] | (RefSeq) ferric reduction oxidase 7, chloroplastic-like (A)	NAC domain-containing protein 90-like [Chenopodium quinoa]	RecName: Full=NAC domain-containing protein 90; Short=ANAC090;	SubName: Full=Uncharacterized protein {ECO:0000313|EMBL:OAY38223.1};	--	GO:0005634,nucleus; GO:0003677,DNA binding; GO:0003700,DNA-binding transcription factor activity; GO:0006351,transcription, DNA-templated	No apical meristem (NAM) protein
gene-LOC110688163	0.8	0.35	0.49	30.59	36.72	20.75	35	15	19	1252	1693	820	0.018	-5.77	3.81451e-44	9.79238e-41	down	NW_018743920.1	5998047	6007345	-	LOC110688163	--	K03695 ATP-dependent Clp protease ATP-binding subunit ClpB | (RefSeq) chaperone protein ClpB1-like (A)	aluminum-activated malate transporter 2-like [Chenopodium quinoa]	RecName: Full=Aluminum-activated malate transporter 7; Short=AtALMT7;	SubName: Full=Uncharacterized protein {ECO:0000313|EMBL:KNA25976.1};	Predicted membrane protein	GO:0016021,integral component of membrane; GO:0009705,plant-type vacuole membrane; GO:0015140,malate transmembrane transporter activity	Aluminium activated malate transporter
gene-LOC110688164	3.96	6.8	2.56	56.77	37.55	41.44	205	345	117	2738	2040	1930	0.095	-3.403	1.37533e-23	1.4538e-20	down	NW_018743920.1	6060490	6070054	+	LOC110688164	--	--	BEL1-like homeodomain protein 1 [Chenopodium quinoa]	RecName: Full=BEL1-like homeodomain protein 1; Short=BEL1-like protein 1; AltName: Full=Protein EMBRYO SAC DEVELOPMENT ARREST 29;	SubName: Full=Uncharacterized protein {ECO:0000313|EMBL:KNA25228.1};	Transcription factor MEIS1 and related HOX domain proteins	GO:0005737,cytoplasm; GO:0005634,nucleus; GO:0003677,DNA binding; GO:0003700,DNA-binding transcription factor activity; GO:0046982,protein heterodimerization activity; GO:0042803,protein homodimerization activity; GO:0010197,polar nucleus fusion; GO:0009737,response to abscisic acid; GO:0010201,response to continuous far red light stimulus by the high-irradiance response system; GO:0009610,respon…	Associated with HOX
gene-LOC110688244	2.62	2.2	1.76	3.31	12.04	11.21	125	103	74	147	603	481	0.233	-2.102	8.09965e-05	0.00374166	down	NW_018743920.1	6889389	6897553	+	LOC110688244	--	K17871 NADH:ubiquinone reductase (non-electrogenic) [EC:1.6.5.9] | (RefSeq) internal alternative NAD(P)H-ubiquinone oxidoreductase A1, mitochondrial-like (A)	internal alternative NAD(P)H-ubiquinone oxidoreductase A1, mitochondrial-like [Chenopodium quinoa]	RecName: Full=Internal alternative NAD(P)H-ubiquinone oxidoreductase A1, mitochondrial; EC=1.6.5.9; AltName: Full=Internal alternative NADH dehydrogenase NDA1; AltName: Full=Internal non-phosphorylating NAD(P)H dehydrogenase 1; Short=StNDI1; AltName: Full=NADH:ubiquinone reductase (non-electrogenic) NDA1; Flags: Precursor;	SubName: Full=Uncharacterized protein {ECO:0000313|EMBL:KNA22463.1};	NADH-dehydrogenase (ubiquinone)	GO:0005743,mitochondrial inner membrane; GO:0005759,mitochondrial matrix; GO:0005777,peroxisome; GO:0003959,NADPH dehydrogenase activity; GO:0055114,oxidation-reduction process	Pyridine nucleotide-disulphide oxidoreductase
gene-LOC110688246	2.83	6.58	10.24	3.45	1.96	1.65	162	369	517	184	118	85	2.689	1.427	0.00205807	0.0422187	up	NW_018743920.1	6905204	6910202	-	LOC110688246	--	K14833 nucleolar complex protein 2 | (RefSeq) nucleolar complex protein 2 homolog (A)	nucleolar complex protein 2 homolog [Chenopodium quinoa]	RecName: Full=Nucleolar complex protein 2 homolog; Short=Protein NOC2 homolog;	SubName: Full=Uncharacterized protein {ECO:0000313|EMBL:KNA24670.1};	Predicted protein involved in nuclear export of pre-ribosomes	GO:0005829,cytosol; GO:0030690,Noc1p-Noc2p complex; GO:0030691,Noc2p-Noc3p complex; GO:0005730,nucleolus; GO:0005654,nucleoplasm; GO:0042273,ribosomal large subunit biogenesis	Noc2p family
gene-LOC110688250	1.59	2.14	1.56	6.29	4.82	2.05	94	124	81	346	299	109	0.393	-1.348	0.00102791	0.025998	down	NW_018743920.1	6929269	6934553	-	LOC110688250	--	--	--	--	--	--	--	--
gene-LOC110688260	2.1	3.24	2.27	0.44	0.5	0.38	143	216	136	28	36	23	5.474	2.453	1.50115e-13	4.78717e-11	up	NW_018743920.1	7003242	7009618	-	LOC110688260	--	K13667 protein glucosyltransferase [EC:2.4.1.-] | (RefSeq) O-glucosyltransferase rumi (A)	O-glucosyltransferase rumi homolog [Chenopodium quinoa]	--	SubName: Full=Uncharacterized protein {ECO:0000313|EMBL:KNA16620.1};	Endoplasmic reticulum protein EP58, contains filamin rod domain and KDEL motif	--	Glycosyl transferase family 90
gene-LOC110688265	2.16	3.82	3.62	0.04	0.01	0	157	272	232	3	1	0	160.566	7.327	9.08425e-20	5.83014e-17	up	NW_018742309.1	3808891	3812971	-	LOC110688265	--	--	K(+) efflux antiporter 5-like isoform X1 [Chenopodium quinoa]	RecName: Full=K(+) efflux antiporter 5 {ECO:0000303|PubMed:11500563}; Short=AtKEA5 {ECO:0000303|PubMed:11500563}; Flags: Precursor;	SubName: Full=Uncharacterized protein {ECO:0000313|EMBL:KNA17736.1};	Predicted K+/H+-antiporter	GO:0016021,integral component of membrane; GO:0016020,membrane; GO:0022890,inorganic cation transmembrane transporter activity; GO:0015299,solute:proton antiporter activity; GO:0006813,potassium ion transport	Sodium/hydrogen exchanger family
gene-LOC110688273	4.21	4.61	3.32	11.3	6.78	9.66	193	207	134	482	326	398	0.428	-1.225	4.917e-06	0.000347868	down	NW_018743920.1	7122766	7127027	+	LOC110688273	--	K01114 phospholipase C [EC:3.1.4.3] | (RefSeq) non-specific phospholipase C1-like (A)	non-specific phospholipase C1-like [Chenopodium quinoa]	RecName: Full=Non-specific phospholipase C1; EC=3.1.-.-; Flags: Precursor;	SubName: Full=Uncharacterized protein {ECO:0000313|EMBL:KNA24161.1};	--	GO:0005576,extracellular region; GO:0003993,acid phosphatase activity; GO:0009395,phospholipid catabolic process	Phosphoesterase family
gene-LOC110688297	0.03	0	0	6.33	3.52	2.22	1	0	0	219	137	74	0.003	-8.644	1.27154e-11	2.94939e-09	down	NW_018742309.1	3831039	3834125	+	LOC110688297	--	--	--	--	--	--	--	--
gene-LOC110688300	31.69	7.38	28.13	5.49	6.25	6.98	1899	433	1485	306	393	376	3.567	1.835	0.000533031	0.0163643	up	NW_018743920.1	7342916	7348017	-	LOC110688300	--	K03147 phosphomethylpyrimidine synthase [EC:4.1.99.17] | (RefSeq) phosphomethylpyrimidine synthase, chloroplastic isoform X1 (A)	phosphomethylpyrimidine synthase, chloroplastic isoform X1 [Chenopodium quinoa]	RecName: Full=Phosphomethylpyrimidine synthase, chloroplastic; EC=4.1.99.17; AltName: Full=Hydroxymethylpyrimidine phosphate synthase; Short=HMP-P synthase; Short=HMP-phosphate synthase; Short=HMPP synthase; AltName: Full=Protein PYRIMIDINE REQUIRING; AltName: Full=Thiamine biosynthesis protein ThiC; Short=Protein THIAMINE C; Flags: Precursor;	SubName: Full=Uncharacterized protein {ECO:0000313|EMBL:KNA05284.1};	--	GO:0009507,chloroplast; GO:0009570,chloroplast stroma; GO:0009536,plastid; GO:0051539,4 iron, 4 sulfur cluster binding; GO:0080041,ADP-ribose pyrophosphohydrolase activity; GO:0016830,carbon-carbon lyase activity; GO:0051536,iron-sulfur cluster binding; GO:0046872,metal ion binding; GO:0019904,protein domain specific binding; GO:0010266,response to vitamin B1; GO:0009228,thiamine biosynthetic pro…	Radical SAM ThiC family
gene-LOC110688302	0	0	0	5.19	3.73	2.32	0	0	0	37	30	16	0.007	-7.244	1.97231e-07	1.95275e-05	down	NW_018742309.1	3834144	3842105	+	LOC110688302	--	--	--	--	--	--	--	--
gene-LOC110688308	0	0	0	1.03	1.33	0.69	0	0	0	20	29	13	0.009	-6.836	2.35682e-06	0.00018414	down	NW_018742309.1	3813030	3816147	+	LOC110688308	--	--	--	--	--	--	--	--
gene-LOC110688327	11.35	5.13	9.15	2.13	3.19	2	183	81	130	32	54	29	3.426	1.777	0.000248673	0.00903671	up	NW_018743920.1	7580489	7581848	-	LOC110688327	--	--	uncharacterized protein LOC110688327 [Chenopodium quinoa]	--	SubName: Full=Uncharacterized protein {ECO:0000313|EMBL:KNA02968.1};	--	--	--
gene-LOC110688328	1.78	2.65	3.46	1.28	0.28	0.41	67	98	115	45	11	14	4.005	2.002	0.000497691	0.0154732	up	NW_018743920.1	7585326	7588054	+	LOC110688328	--	K06636 structural maintenance of chromosome 1 | (RefSeq) structural maintenance of chromosomes protein 2-2-like (A)	protein GRAVITROPIC IN THE LIGHT 1-like [Chenopodium quinoa]	RecName: Full=Protein GRAVITROPIC IN THE LIGHT 1 {ECO:0000303|PubMed:16640600};	SubName: Full=Uncharacterized protein {ECO:0000313|EMBL:KNA11631.1};	--	GO:0009959,negative gravitropism; GO:0009639,response to red or far red light	Plant protein of unknown function (DUF641)
gene-LOC110688336	21.65	34.4	53.56	22.66	11.36	9.1	712	1108	1552	694	392	269	2.495	1.319	0.001005	0.0255804	up	NW_018743920.1	7658994	7661176	+	LOC110688336	--	K07375 tubulin beta | (RefSeq) tubulin beta-2 chain-like (A)	tubulin beta-2 chain-like [Chenopodium quinoa]	RecName: Full=Tubulin beta-3 chain;	RecName: Full=Tubulin beta chain {ECO:0000256|RuleBase:RU000352};	Beta tubulin	GO:0005737,cytoplasm; GO:0005874,microtubule; GO:0005525,GTP binding; GO:0003924,GTPase activity; GO:0005200,structural constituent of cytoskeleton; GO:0007017,microtubule-based process	Tubulin/FtsZ family, GTPase domain
gene-LOC110688373	0.51	0.08	0.16	0.59	2.21	1.83	25	4	7	27	114	81	0.16	-2.645	0.0013763	0.0321712	down	NW_018743920.1	7945639	7948053	-	LOC110688373	--	K01176 alpha-amylase [EC:3.2.1.1] | (RefSeq) lectin-domain containing receptor kinase VI.3-like (A)	L-type lectin-domain containing receptor kinase IV.2-like [Chenopodium quinoa]	RecName: Full=L-type lectin-domain containing receptor kinase IV.2 {ECO:0000303|PubMed:19773388}; Short=Arabidopsis thaliana lectin-receptor kinase a4 {ECO:0000303|PubMed:19773388}; Short=AthlecRK-a4 {ECO:0000303|Ref.6}; Short=LecRK-IV.2 {ECO:0000303|PubMed:19773388}; EC=2.7.11.1 {ECO:0000255|PROSITE-ProRule:PRU00159}; AltName: Full=Protein SMALL, GLUED-TOGETHER, AND COLLAPSED POLLEN {ECO:0000303…	SubName: Full=Uncharacterized protein {ECO:0000313|EMBL:KNA02682.1};	--	GO:0016021,integral component of membrane; GO:0005886,plasma membrane; GO:0005524,ATP binding; GO:0030246,carbohydrate binding; GO:0004674,protein serine/threonine kinase activity; GO:0042742,defense response to bacterium; GO:0009555,pollen development	Legume lectin domain
gene-LOC110688414	2.82	3.24	1.4	2.64	18.96	6.94	103	116	45	90	727	228	0.241	-2.053	0.00262523	0.0497368	down	NW_018743920.1	8332384	8336024	-	LOC110688414	--	K00924 kinase [EC:2.7.1.-] | (RefSeq) probable receptor-like protein kinase At3g55450 isoform X1 (A)	probable serine/threonine-protein kinase PBL10 [Chenopodium quinoa]	RecName: Full=Probable serine/threonine-protein kinase PBL10 {ECO:0000305}; EC=2.7.11.1 {ECO:0000305}; AltName: Full=PBS1-like protein 10 {ECO:0000303|PubMed:20413097}; AltName: Full=Protein kinase 1B {ECO:0000305};	SubName: Full=Uncharacterized protein {ECO:0000313|EMBL:KNA10437.1};	Serine/threonine protein kinase	GO:0005886,plasma membrane; GO:0005524,ATP binding; GO:0004713,protein tyrosine kinase activity; GO:0004675,transmembrane receptor protein serine/threonine kinase activity; GO:0007166,cell surface receptor signaling pathway; GO:0006952,defense response; GO:1902458,positive regulation of stomatal opening; GO:0006468,protein phosphorylation	Protein tyrosine kinase
gene-LOC110688492	3.85	7.41	7.34	3.29	2.48	2.91	166	313	279	132	112	113	2.045	1.032	0.0005521	0.0166862	up	NW_018743920.1	9270074	9272190	+	LOC110688492	--	K15397 3-ketoacyl-CoA synthase [EC:2.3.1.199] | (RefSeq) 3-ketoacyl-CoA synthase 12-like (A)	3-ketoacyl-CoA synthase 12-like [Chenopodium quinoa]	RecName: Full=3-ketoacyl-CoA synthase 12 {ECO:0000303|PubMed:18465198}; Short=KCS-12 {ECO:0000303|PubMed:18465198}; EC=2.3.1.199 {ECO:0000305}; AltName: Full=Very long-chain fatty acid condensing enzyme 12 {ECO:0000303|PubMed:18465198}; Short=VLCFA condensing enzyme 12 {ECO:0000303|PubMed:18465198}; Flags: Precursor;	RecName: Full=3-ketoacyl-CoA synthase {ECO:0000256|PIRNR:PIRNR036417}; EC=2.3.1.- {ECO:0000256|PIRNR:PIRNR036417};	--	GO:0005783,endoplasmic reticulum; GO:0016020,membrane; GO:0102336,3-oxo-arachidoyl-CoA synthase activity; GO:0102337,3-oxo-cerotoyl-CoA synthase activity; GO:0102338,3-oxo-lignoceronyl-CoA synthase activity; GO:0102756,very-long-chain 3-ketoacyl-CoA synthase activity; GO:0006633,fatty acid biosynthetic process	FAE1/Type III polyketide synthase-like protein
gene-LOC110688563	133.36	72.78	66.27	193.41	279.47	350.19	7303	3903	3197	9861	16050	17239	0.323	-1.632	9.5993e-05	0.00426006	down	NW_018742309.1	5450459	5455786	+	LOC110688563	--	K00521 ferric-chelate reductase [EC:1.16.1.7] | (RefSeq) ferric reduction oxidase 7, chloroplastic-like (A)	ferric reduction oxidase 7, chloroplastic-like [Chenopodium quinoa]	RecName: Full=Ferric reduction oxidase 7, chloroplastic; Short=AtFRO7; EC=1.16.1.7; AltName: Full=Ferric-chelate reductase 7; Flags: Precursor;	SubName: Full=Uncharacterized protein {ECO:0000313|EMBL:KNA10876.1};	Ferric reductase, NADH/NADPH oxidase and related proteins	GO:0009507,chloroplast; GO:0031969,chloroplast membrane; GO:0016021,integral component of membrane; GO:0000293,ferric-chelate reductase activity; GO:0046872,metal ion binding; GO:0006811,ion transport; GO:0009767,photosynthetic electron transport chain	Ferric reductase NAD binding domain
gene-LOC110688675	0.61	1.04	0.46	3.99	3.63	2.92	36	60	24	218	223	154	0.193	-2.37	1.72019e-11	3.88827e-09	down	NW_018743937.1	36713	44022	-	LOC110688675	--	--	--	--	--	--	--	--
gene-LOC110688693	0.52	0.65	0.52	1.15	1.32	1.39	23	28	20	47	61	55	0.418	-1.258	0.00210726	0.0428365	down	NW_018743937.1	1129436	1145566	+	LOC110688693	--	K13416 brassinosteroid insensitive 1-associated receptor kinase 1 [EC:2.7.10.1 2.7.11.1] | (RefSeq) BRASSINOSTEROID INSENSITIVE 1-associated receptor kinase 1-like (A)	BRASSINOSTEROID INSENSITIVE 1-associated receptor kinase 1-like [Chenopodium quinoa]	RecName: Full=BRASSINOSTEROID INSENSITIVE 1-associated receptor kinase 1 {ECO:0000303|PubMed:12150929}; Short=AtBAK1 {ECO:0000303|PubMed:12150929}; Short=BRI1-associated receptor kinase 1 {ECO:0000303|PubMed:12150929}; EC=2.7.10.1 {ECO:0000305}; EC=2.7.11.1 {ECO:0000305}; AltName: Full=Protein ELONGATED; AltName: Full=Somatic embryogenesis receptor kinase 3 {ECO:0000303|PubMed:11706164}; Short=At…	SubName: Full=Uncharacterized protein {ECO:0000313|EMBL:KNA16065.1};	--	GO:0010008,endosome membrane; GO:0016021,integral component of membrane; GO:0005886,plasma membrane; GO:0005524,ATP binding; GO:0033612,receptor serine/threonine kinase binding; GO:0004675,transmembrane receptor protein serine/threonine kinase activity; GO:0004714,transmembrane receptor protein tyrosine kinase activity; GO:0007166,cell surface receptor signaling pathway	Protein kinase domain
gene-LOC110688699	0.03	0	0	0.62	0.54	0.68	2	0	0	44	43	47	0.014	-6.109	1.25074e-07	1.32601e-05	down	NW_018743937.1	1594221	1599553	-	LOC110688699	--	K05349 beta-glucosidase [EC:3.2.1.21] | (RefSeq) probable beta-glucosidase F (A)	uncharacterized protein LOC110688699 isoform X1 [Chenopodium quinoa]	--	SubName: Full=Uncharacterized protein {ECO:0000313|EMBL:KNA19270.1};	--	--	--
gene-LOC110688719	12.73	19.41	19.54	10.73	4.78	8.26	312	466	422	245	123	182	2.115	1.08	0.000601424	0.0177901	up	NW_018743937.1	2447692	2448894	+	LOC110688719	--	K14488 SAUR family protein | (RefSeq) auxin-responsive protein SAUR50-like (A)	auxin-responsive protein SAUR50-like [Chenopodium quinoa]	RecName: Full=Auxin-responsive protein SAUR50 {ECO:0000303|PubMed:12036261}; AltName: Full=Protein SMALL AUXIN UP RNA 50 {ECO:0000303|PubMed:12036261};	SubName: Full=Uncharacterized protein {ECO:0000313|EMBL:KMS95424.1};	--	GO:0009734,auxin-activated signaling pathway; GO:0040008,regulation of growth	Auxin responsive protein
gene-LOC110688752	0.45	0.12	0.35	2.76	1.49	1.18	42	11	29	239	145	99	0.175	-2.518	7.03485e-06	0.000470824	down	NW_018743937.1	4345596	4355696	-	LOC110688752	--	K21444 poly(rC)-binding protein 3/4 | (RefSeq) KH domain-containing protein HEN4-like (A)	KH domain-containing protein HEN4-like [Chenopodium quinoa]	RecName: Full=RNA-binding KH domain-containing protein RCF3 {ECO:0000305|PubMed:23087326}; AltName: Full=Protein ENHANCED STRESS RESPONSE 1 {ECO:0000303|PubMed:25985302}; AltName: Full=Protein HIGH OSMOTIC STRESS GENE EXPRESSION 5 {ECO:0000303|PubMed:24146632}; AltName: Full=Protein REGULATOR OF CBF GENE EXPRESSION 3 {ECO:0000303|PubMed:23087326}; AltName: Full=Protein SHINY 1 {ECO:0000303|PubMed…	SubName: Full=Uncharacterized protein {ECO:0000313|EMBL:KNA22988.1};	PolyC-binding proteins alphaCP-1 and related KH domain proteins	GO:0010445,nuclear dicing body; GO:0016607,nuclear speck; GO:0070878,primary miRNA binding; GO:0010286,heat acclimation; GO:0009867,jasmonic acid mediated signaling pathway; GO:0006397,mRNA processing; GO:0031053,primary miRNA processing; GO:1900150,regulation of defense response to fungus; GO:0010468,regulation of gene expression; GO:0006970,response to osmotic stress; GO:0008380,RNA splicing	KH domain
gene-LOC110688821	4.8	4.31	3.88	8.87	6.59	11.42	525	462	374	904	757	1124	0.469	-1.092	0.000200457	0.00760937	down	NW_018743942.1	982399	992737	+	LOC110688821	--	K10615 E3 ubiquitin-protein ligase HERC4 [EC:2.3.2.26] | (RefSeq) probable E3 ubiquitin-protein ligase HERC4 isoform X1 (A)	uncharacterized protein LOC110688821 isoform X1 [Chenopodium quinoa]	RecName: Full=Ultraviolet-B receptor UVR8; AltName: Full=Protein UV-B RESISTANCE 8; AltName: Full=RCC1 domain-containing protein UVR8;	SubName: Full=Uncharacterized protein {ECO:0000313|EMBL:KNA13759.1};	FOG: RCC1 domain	GO:0000785,chromatin; GO:0005829,cytosol; GO:0005634,nucleus; GO:0003682,chromatin binding; GO:0005085,guanyl-nucleotide exchange factor activity; GO:0042802,identical protein binding; GO:0009881,photoreceptor activity; GO:0042803,protein homodimerization activity; GO:0009649,entrainment of circadian clock; GO:0018298,protein-chromophore linkage; GO:0009411,response to UV; GO:0010224,response to …	Regulator of chromosome condensation (RCC1) repeat
gene-LOC110688829	129.16	115.38	97.22	187.59	301.26	186.35	6236	5455	4135	8432	15254	8088	0.486	-1.041	0.00106268	0.0266666	down	NW_018743942.1	1386467	1389785	-	LOC110688829	--	--	DNA ligase 1-like [Chenopodium quinoa]	--	SubName: Full=Uncharacterized protein {ECO:0000313|EMBL:KNA06937.1};	--	--	--
gene-LOC110688848	2.72	3.87	1.41	8.46	10.89	7.69	79	110	36	229	332	201	0.281	-1.829	7.70858e-06	0.000510214	down	NW_018743942.1	1805384	1812642	-	LOC110688848	--	K14493 gibberellin receptor GID1 [EC:3.-.-.-] | (RefSeq) GID1b-1; hypothetical protein (A)	probable carboxylesterase 15 [Chenopodium quinoa]	RecName: Full=Probable carboxylesterase 15; AltName: Full=AtCXE15; EC=3.1.1.1;	SubName: Full=Uncharacterized protein {ECO:0000313|EMBL:KNA15661.1};	Arylacetamide deacetylase	GO:0052689,carboxylic ester hydrolase activity; GO:0016787,hydrolase activity; GO:0009056,catabolic process	alpha/beta hydrolase fold
gene-LOC110688954	0.73	1.67	1.23	0.46	0.16	0.16	31	69	46	18	7	6	4.586	2.197	0.000252202	0.00912802	up	NW_018743946.1	969726	994967	+	LOC110688954	--	K13065 shikimate O-hydroxycinnamoyltransferase [EC:2.3.1.133] | (RefSeq) shikimate O-hydroxycinnamoyltransferase-like (A)	shikimate O-hydroxycinnamoyltransferase-like [Chenopodium quinoa]	RecName: Full=Shikimate O-hydroxycinnamoyltransferase; EC=2.3.1.133; AltName: Full=Hydroxycinnamoyl transferase; AltName: Full=Hydroxycinnamoyl-Coenzyme A shikimate/quinate hydroxycinnamoyltransferase;	SubName: Full=Uncharacterized protein {ECO:0000313|EMBL:CCB45012.1};	--	GO:0047172,shikimate O-hydroxycinnamoyltransferase activity	Transferase family
gene-LOC110688971	27.83	24.87	20.72	45.07	61.31	49.55	634	555	416	956	1465	1015	0.453	-1.141	6.09174e-05	0.00298279	down	NW_018743946.1	1544866	1561794	-	LOC110688971	--	K09874 aquaporin NIP | (RefSeq) aquaporin NIP2-1-like (A)	aquaporin NIP2-1-like [Chenopodium quinoa]	RecName: Full=Aquaporin NIP2-1; AltName: Full=NOD26-like intrinsic protein 2-1; AltName: Full=ZmNIP2-1; AltName: Full=ZmNIP2;1;	SubName: Full=Uncharacterized protein {ECO:0000313|EMBL:OAY60170.1};	Aquaporin (major intrinsic protein family)	GO:0016021,integral component of membrane; GO:0015267,channel activity; GO:0015840,urea transport	Major intrinsic protein
gene-LOC110688978	1.76	1.39	1.1	4.71	2.23	5.2	49	38	27	122	65	130	0.346	-1.529	0.000839497	0.0225497	down	NW_018743946.1	2103340	2104704	-	LOC110688978	--	K02183 calmodulin | (RefSeq) probable calcium-binding protein CML45 (A)	probable calcium-binding protein CML45 [Chenopodium quinoa]	RecName: Full=Probable calcium-binding protein CML45; AltName: Full=Calmodulin-like protein 45;	SubName: Full=Uncharacterized protein {ECO:0000313|EMBL:KDO37337.1};	Calmodulin and related proteins (EF-Hand superfamily)	GO:0005509,calcium ion binding	EF hand
gene-LOC110688983	0.24	0.28	0.27	15.76	13.65	9.98	15	17	15	911	889	557	0.02	-5.675	5.53109e-69	8.01982e-65	down	NW_018743946.1	2260759	2270402	+	LOC110688983	--	--	--	--	--	--	--	--
gene-LOC110688998	2.14	2.93	3.06	1.81	0.85	1.13	103	138	130	81	43	49	2.098	1.069	0.00178691	0.0385475	up	NW_018743946.1	3047242	3059914	-	LOC110688998	--	--	uncharacterized protein LOC110688998 isoform X1 [Chenopodium quinoa]	--	SubName: Full=Uncharacterized protein {ECO:0000313|EMBL:KNA25421.1};	--	--	Tetratricopeptide repeat
gene-LOC110689008	0	0	0	0.63	0.34	0.21	0	0	0	101	62	33	0.003	-8.472	1.63205e-10	3.01132e-08	down	NW_018743946.1	3476508	3485148	-	LOC110689008	--	--	--	--	--	--	--	--
gene-LOC110689014	2.52	1.85	2.81	0	0	0	57	41	56	0	0	0	274.976	8.103	5.91043e-10	9.70752e-08	up	NW_018743946.1	3788390	3791498	-	LOC110689014	--	K13201 nucleolysin TIA-1/TIAR | (RefSeq) oligouridylate-binding protein 1-like isoform X1 (A)	uncharacterized protein LOC110689014 [Chenopodium quinoa]	--	SubName: Full=Uncharacterized protein {ECO:0000313|EMBL:KNA26131.1};	--	GO:0016021,integral component of membrane	GRF zinc finger
gene-LOC110689069	0.2	1.12	1.3	0	0	0	4	22	23	0	0	0	84.943	6.408	0.000104429	0.00451105	up	NW_018743946.1	1875885	1877368	-	LOC110689069	--	--	--	--	--	--	--	--
gene-LOC110689071	0	0	0	0.68	0.84	0.79	0	0	0	31	43	35	0.005	-7.674	8.07012e-09	1.08865e-06	down	NW_018743946.1	2277082	2280332	-	LOC110689071	--	--	--	--	--	--	--	--
gene-LOC110689079	0.2	0.24	0.19	1.61	0.49	0.8	6	7	5	44	15	21	0.221	-2.176	0.00227644	0.0452268	down	NW_018743951.1	6903	12584	-	LOC110689079	--	--	--	--	--	--	--	--
gene-LOC110689125	1.27	1.67	1.74	3.37	3.22	3.05	48	62	58	119	128	104	0.465	-1.106	0.000105206	0.00453131	down	NW_018743955.1	258099	262636	+	LOC110689125	--	--	uncharacterized protein LOC110689125 [Chenopodium quinoa]	--	SubName: Full=Uncharacterized protein {ECO:0000313|EMBL:KNA25772.1};	--	GO:0006396,RNA processing	Tetratricopeptide repeat
gene-LOC110689149	2.34	2.52	1.57	3.31	4.97	4.62	196	207	116	258	437	348	0.475	-1.073	0.00169678	0.037321	down	NW_018743955.1	1113508	1140049	+	LOC110689149	--	K01115 phospholipase D1/2 [EC:3.1.4.4] | (RefSeq) phospholipase D zeta 1-like (A)	phospholipase D zeta 1-like [Chenopodium quinoa]	RecName: Full=Phospholipase D zeta 1 {ECO:0000303|PubMed:11891260}; Short=PLDzeta1 {ECO:0000303|PubMed:11891260}; EC=3.1.4.4 {ECO:0000269|PubMed:11891260}; AltName: Full=Phospholipase D p1; Short=AtPLDp1; AltName: Full=Phospholipase D1 PHOX and PX-containing domain protein;	RecName: Full=Phospholipase {ECO:0000256|PIRNR:PIRNR009376}; EC=3.1.4.4 {ECO:0000256|PIRNR:PIRNR009376};	Phospholipase D1	GO:0031410,cytoplasmic vesicle; GO:0070290,N-acylphosphatidylethanolamine-specific phospholipase D activity; GO:0035091,phosphatidylinositol binding; GO:0004630,phospholipase D activity; GO:0048017,inositol lipid-mediated signaling; GO:0008610,lipid biosynthetic process; GO:0016042,lipid catabolic process; GO:0006654,phosphatidic acid biosynthetic process; GO:0048364,root development	Phospholipase D Active site motif
gene-LOC110689247	0.15	0.12	0.17	0.84	0.37	0.47	9	7	9	46	23	25	0.264	-1.923	0.0015599	0.035026	down	NW_018743955.1	5928579	5932199	+	LOC110689247	--	--	--	--	--	--	--	--
gene-LOC110689266	0.04	0.03	0.01	0.15	0.34	0.43	6	4	1	21	54	58	0.078	-3.681	6.46686e-06	0.000438526	down	NW_018743955.1	6331899	6350851	+	LOC110689266	--	K14400 pre-mRNA cleavage complex 2 protein Pcf11 | (RefSeq) LOW QUALITY PROTEIN: uncharacterized protein LOC111982967 (A)	protein MAIN-LIKE 1-like [Chenopodium quinoa]	RecName: Full=Protein MAIN-LIKE 1 {ECO:0000303|PubMed:24635680};	SubName: Full=Uncharacterized protein {ECO:0000313|EMBL:OMO67845.1};	--	GO:0005634,nucleus; GO:0008483,transaminase activity; GO:0016458,gene silencing; GO:0010073,meristem maintenance; GO:0010082,regulation of root meristem growth	Plant mobile domain
gene-LOC110689268	0.77	0.8	0.79	0.05	0.04	0.04	83	84	75	5	4	4	18.153	4.182	1.80932e-14	6.37519e-12	up	NW_018743955.1	6339979	6345234	-	LOC110689268	--	--	--	--	--	--	--	--
gene-LOC110689277	1.6	1.59	1.23	4.03	3.62	3.42	74	72	50	173	175	142	0.389	-1.363	1.25622e-06	0.000106232	down	NW_018743955.1	6508634	6514867	+	LOC110689277	--	--	--	--	--	--	--	--
gene-LOC110689308	6.32	5.73	6.22	2.14	2.26	2.39	203	180	176	64	76	69	2.603	1.38	1.29682e-06	0.000108643	up	NW_018743955.1	6795362	6801495	-	LOC110689308	--	K00031 isocitrate dehydrogenase [EC:1.1.1.42] | (RefSeq) isocitrate dehydrogenase [NADP]-like (A)	isocitrate dehydrogenase [NADP]	RecName: Full=Isocitrate dehydrogenase [NADP]; Short=IDH; EC=1.1.1.42; AltName: Full=IDP; AltName: Full=NADP(+)-specific ICDH; AltName: Full=Oxalosuccinate decarboxylase;	RecName: Full=Isocitrate dehydrogenase [NADP] {ECO:0000256|PIRNR:PIRNR000108}; EC=1.1.1.42 {ECO:0000256|PIRNR:PIRNR000108};	NADP-dependent isocitrate dehydrogenase	GO:0005737,cytoplasm; GO:0004450,isocitrate dehydrogenase (NADP+) activity; GO:0000287,magnesium ion binding; GO:0051287,NAD binding; GO:0006097,glyoxylate cycle; GO:0006102,isocitrate metabolic process; GO:0006099,tricarboxylic acid cycle	Isocitrate/isopropylmalate dehydrogenase
gene-LOC110689342	0	0	0	0.08	0.64	1.21	0	0	0	2	19	31	0.01	-6.679	0.000167557	0.00662487	down	NW_018743955.1	7187243	7188925	+	LOC110689342	--	--	--	--	--	--	--	--
gene-LOC110689357	2.88	2.83	1.91	11.46	5.15	14.18	140	135	82	519	263	620	0.242	-2.046	8.33865e-07	7.32741e-05	down	NW_018743955.1	7333206	7336459	+	LOC110689357	--	K13783 MFS transporter, OPA family, solute carrier family 37 (glycerol-3-phosphate transporter), member 1/2 | (RefSeq) putative glycerol-3-phosphate transporter 1 (A)	putative glycerol-3-phosphate transporter 1 [Chenopodium quinoa]	RecName: Full=Putative glycerol-3-phosphate transporter 1; Short=G-3-P transporter 1; AltName: Full=Glycerol-3-phosphate permease 1; Short=AtG3Pp1; Short=G-3-P permease 1; AltName: Full=Protein PHOSPHATE STARVATION-INDUCED GENE 3; Short=AtPS3;	SubName: Full=Uncharacterized protein {ECO:0000313|EMBL:KMS98872.1};	Permease of the major facilitator superfamily	GO:0016021,integral component of membrane; GO:0022857,transmembrane transporter activity; GO:0008643,carbohydrate transport; GO:0055062,phosphate ion homeostasis	Major Facilitator Superfamily
gene-LOC110689437	28.48	14.61	10.16	35.11	48.05	64.22	1292	649	406	1483	2286	2619	0.354	-1.498	0.00155449	0.0349834	down	NW_018743955.1	8256564	8261016	-	LOC110689437	--	K08176 MFS transporter, PHS family, inorganic phosphate transporter | (RefSeq) probable inorganic phosphate transporter 1-4 (A)	probable inorganic phosphate transporter 1-4 [Chenopodium quinoa]	RecName: Full=Probable inorganic phosphate transporter 1-4; Short=OsPT4; Short=OsPht1;4; AltName: Full=H(+)/Pi cotransporter; AltName: Full=OsPT1;	SubName: Full=Uncharacterized protein {ECO:0000313|EMBL:KNA12764.1};	Inorganic phosphate transporter	GO:0005887,integral component of plasma membrane; GO:0005315,inorganic phosphate transmembrane transporter activity; GO:0015293,symporter activity; GO:0006817,phosphate ion transport	Sugar (and other) transporter
gene-LOC110689511	0	0	0	0.03	0.42	0.9	0	0	0	2	29	54	0.006	-7.398	2.17195e-05	0.00127967	down	NW_018743955.1	7195829	7202074	+	LOC110689511	--	K13420 LRR receptor-like serine/threonine-protein kinase FLS2 [EC:2.7.11.1] | (RefSeq) hypothetical protein (A)	receptor-like protein 12 [Chenopodium quinoa]	RecName: Full=Receptor like protein 7 {ECO:0000303|PubMed:18434605}; Short=AtRLP7 {ECO:0000303|PubMed:18434605}; Flags: Precursor;	SubName: Full=Uncharacterized protein {ECO:0000313|EMBL:KZM95439.1};	FOG: Leucine rich repeat	GO:0016021,integral component of membrane	Leucine rich repeat
gene-LOC110689606	0	0.02	0	1.42	0.81	0.91	0	1	0	58	37	36	0.008	-6.956	9.34438e-08	1.02818e-05	down	NW_018743975.1	82164	85929	-	LOC110689606	--	K02952 small subunit ribosomal protein S13 | (RefSeq) 30S ribosomal protein S13, chloroplastic-like (A)	uncharacterized protein LOC110689606 isoform X1 [Chenopodium quinoa]	--	SubName: Full=Uncharacterized protein {ECO:0000313|EMBL:KNA05334.1};	--	--	Alpha/beta hydrolase family
gene-LOC110689711	15.46	13.94	12.06	6.73	4.43	5.65	429	379	295	174	129	141	2.422	1.276	1.38926e-06	0.000115312	up	NW_018743977.1	1373107	1374632	+	LOC110689711	--	--	uncharacterized protein LOC110689711 [Chenopodium quinoa]	--	SubName: Full=Uncharacterized protein {ECO:0000313|EMBL:KNA18133.1};	--	GO:0006396,RNA processing	Tetratricopeptide repeat
gene-LOC110689795	0	0	0	0.1	0.24	2.21	0	0	0	3	8	63	0.007	-7.236	7.22653e-05	0.00340395	down	NW_018743977.1	3020080	3024993	-	LOC110689795	--	--	--	--	--	--	--	--
gene-LOC110689813	2.61	5.2	6.32	2.67	1.31	1.34	139	271	296	132	73	64	2.584	1.37	0.000634383	0.0183041	up	NW_018743977.1	3519270	3522231	-	LOC110689813	--	K17710 pentatricopeptide repeat domain-containing protein 1 | (RefSeq) pentatricopeptide repeat-containing protein At2g18940, chloroplastic-like (A)	pentatricopeptide repeat-containing protein At1g12775, mitochondrial-like [Chenopodium quinoa]	RecName: Full=Pentatricopeptide repeat-containing protein At1g19525;	SubName: Full=Uncharacterized protein {ECO:0000313|EMBL:KNA03265.1};	FOG: PPR repeat	GO:0043231,intracellular membrane-bounded organelle; GO:0004519,endonuclease activity; GO:0003723,RNA binding; GO:0009451,RNA modification	PPR repeat family
gene-LOC110689825	265.22	130.61	146.49	315.18	475.33	473.62	4135	1994	2012	4575	7772	6638	0.42	-1.253	0.00204792	0.0420591	down	NW_018743977.1	3901664	3902562	-	LOC110689825	--	--	late embryogenesis abundant protein Lea5-like [Chenopodium quinoa]	RecName: Full=Late embryogenesis abundant protein Lea5;	SubName: Full=Uncharacterized protein {ECO:0000313|EMBL:KNA14821.1};	--	GO:0006950,response to stress	Late embryogenesis abundant protein
gene-LOC110689984	0	0	0	2.18	2.62	2.08	0	0	0	191	258	176	0.001	-10.184	1.04396e-16	4.5756e-14	down	NW_018743979.1	585650	590715	+	LOC110689984	--	K17086 transmembrane 9 superfamily member 2/4 | (RefSeq) uncharacterized LOC101300290 (A)	uncharacterized protein LOC110689984 isoform X1 [Chenopodium quinoa]	--	SubName: Full=uncharacterized protein LOC107806465 {ECO:0000313|RefSeq:XP_016486104.1};	--	GO:0008270,zinc ion binding	SWIM zinc finger
gene-LOC110690010	8.92	9.4	10.66	5.3	3.99	3.89	586	605	617	324	275	230	2.141	1.098	3.3467e-08	4.00935e-06	up	NW_018743979.1	2291120	2294430	-	LOC110690010	--	--	uncharacterized protein LOC110690010 [Chenopodium quinoa]	--	SubName: Full=Uncharacterized protein {ECO:0000313|EMBL:KMS96161.1};	--	GO:0005886,plasma membrane	von Willebrand factor type A domain
gene-LOC110690011	5.45	3.45	3.7	1.61	0.97	1.77	182	113	109	50	34	53	2.878	1.525	0.000239172	0.00878363	up	NW_018743979.1	2422561	2426303	-	LOC110690011	--	K13422 transcription factor MYC2 | (RefSeq) transcription factor MYC3-like (A)	transcription factor bHLH61-like [Chenopodium quinoa]	RecName: Full=Transcription factor bHLH93; AltName: Full=Basic helix-loop-helix protein 93; Short=AtbHLH93; Short=bHLH 93; AltName: Full=Transcription factor EN 47; AltName: Full=bHLH transcription factor bHLH093;	SubName: Full=Uncharacterized protein {ECO:0000313|EMBL:KNA15310.1}; Flags: Fragment;	--	GO:0005634,nucleus; GO:0003677,DNA binding; GO:0003700,DNA-binding transcription factor activity; GO:0046983,protein dimerization activity; GO:0045487,gibberellin catabolic process; GO:0007275,multicellular organism development; GO:0010371,regulation of gibberellin biosynthetic process; GO:0006351,transcription, DNA-templated	Helix-loop-helix DNA-binding domain
gene-LOC110690096	5.45	8.35	7.48	3.29	0.87	1.77	48	72	58	27	8	14	3.544	1.826	0.000513404	0.0158793	up	NW_018743981.1	14066	14611	+	LOC110690096	--	--	--	--	--	--	--	--
gene-LOC110690110	8.8	7.37	6.02	1.23	1.79	0.92	277	227	167	36	59	26	5.448	2.446	5.08744e-10	8.58417e-08	up	NW_018743987.1	418073	430215	-	LOC110690110	--	K01719 uroporphyrinogen-III synthase [EC:4.2.1.75] | (RefSeq) LOW QUALITY PROTEIN: uroporphyrinogen-III synthase, chloroplastic-like (A)	LOW QUALITY PROTEIN: uroporphyrinogen-III synthase, chloroplastic-like [Chenopodium quinoa]	RecName: Full=Uroporphyrinogen-III synthase, chloroplastic; EC=4.2.1.75; AltName: Full=Hydroxymethylbilane hydrolyase [cyclizing]; AltName: Full=Uroporphyrinogen-III cosynthase; Flags: Precursor;	SubName: Full=Uncharacterized protein {ECO:0000313|EMBL:KNA24430.1};	--	GO:0009507,chloroplast; GO:0004852,uroporphyrinogen-III synthase activity; GO:0015995,chlorophyll biosynthetic process; GO:0006782,protoporphyrinogen IX biosynthetic process; GO:0006780,uroporphyrinogen III biosynthetic process	Uroporphyrinogen-III synthase HemD
gene-LOC110690203	3.04	3.45	3.18	3.52	16.29	12.56	63	70	58	68	354	234	0.277	-1.855	0.00114921	0.0282894	down	NW_018743992.1	10036	15010	-	LOC110690203	--	--	succinate dehydrogenase assembly factor 2, mitochondrial-like [Chenopodium quinoa]	RecName: Full=Succinate dehydrogenase assembly factor 2, mitochondrial {ECO:0000305}; Short=SDH assembly factor 2 {ECO:0000305}; Flags: Precursor;	SubName: Full=Uncharacterized protein {ECO:0000313|EMBL:KNA10602.1};	Uncharacterized conserved protein	GO:0005739,mitochondrion; GO:0006121,mitochondrial electron transport, succinate to ubiquinone; GO:0034553,mitochondrial respiratory chain complex II assembly; GO:0018293,protein-FAD linkage; GO:0006099,tricarboxylic acid cycle	Flavinator of succinate dehydrogenase
gene-LOC110690208	0.28	0.16	0.37	0.02	0.01	0.03	18	10	21	1	1	2	12.07	3.593	0.000825877	0.0222671	up	NW_018744006.1	31	10945	-	LOC110690208	--	--	--	--	--	--	--	--
gene-LOC110690262	0.63	1.34	1.31	0	0	0	16	33	29	0	0	0	135.746	7.085	4.5283e-07	4.24322e-05	up	NW_018744026.1	4482023	4483500	+	LOC110690262	--	--	uncharacterized protein LOC110690262 [Chenopodium quinoa]	--	SubName: Full=Uncharacterized protein {ECO:0000313|EMBL:KNA09889.1};	--	GO:0005524,ATP binding	--
gene-LOC110690276	0	0	0	2.82	2.63	1.71	0	0	0	41	43	24	0.005	-7.634	1.14028e-08	1.46887e-06	down	NW_018744026.1	649602	650917	+	LOC110690276	--	--	--	--	--	--	--	--
gene-LOC110690277	0	0	0	1.04	0.71	0.75	0	0	0	30	23	21	0.007	-7.099	2.69278e-07	2.62273e-05	down	NW_018744026.1	755953	759500	-	LOC110690277	--	--	--	--	--	--	--	--
gene-LOC110690295	7.91	10.49	13.42	6.91	4.95	3.58	305	396	456	248	200	124	2.005	1.004	0.000915872	0.0240442	up	NW_018744026.1	3956734	3968732	+	LOC110690295	--	K14778 ATP-dependent RNA helicase DDX49/DBP8 [EC:3.6.4.13] | (RefSeq) DEAD-box ATP-dependent RNA helicase 36-like (A)	DEAD-box ATP-dependent RNA helicase 36-like [Chenopodium quinoa]	RecName: Full=DEAD-box ATP-dependent RNA helicase 36; EC=3.6.4.13;	SubName: Full=Uncharacterized protein {ECO:0000313|EMBL:KNA25385.1};	ATP-dependent RNA helicase	GO:0005737,cytoplasm; GO:0005730,nucleolus; GO:0005634,nucleus; GO:0090406,pollen tube; GO:0005524,ATP binding; GO:0004004,ATP-dependent RNA helicase activity; GO:0003676,nucleic acid binding; GO:0009553,embryo sac development; GO:0009561,megagametogenesis; GO:0009791,post-embryonic development; GO:0010501,RNA secondary structure unwinding; GO:0006364,rRNA processing	DEAD/DEAH box helicase
gene-LOC110690303	248.58	233.73	147.13	420.88	531.91	483.51	10725	9875	5592	16906	24068	18753	0.422	-1.244	4.18149e-05	0.00220033	down	NW_018744026.1	4684583	4686939	+	LOC110690303	--	--	early nodulin-like protein 2 [Chenopodium quinoa]	RecName: Full=Early nodulin-like protein 2; AltName: Full=Phytocyanin-like protein; Flags: Precursor;	SubName: Full=Uncharacterized protein {ECO:0000313|EMBL:KNA06148.1};	--	GO:0031225,anchored component of membrane; GO:0046658,anchored component of plasma membrane; GO:0048046,apoplast; GO:0009507,chloroplast; GO:0005886,plasma membrane; GO:0005773,vacuole; GO:0009055,electron transfer activity	Plastocyanin-like domain
gene-LOC110690414	1	2.3	0.91	0.62	0.25	0.49	93	210	75	54	24	41	2.984	1.577	0.00122425	0.0296079	up	NW_018742329.1	3360659	3365381	-	LOC110690414	--	K13420 LRR receptor-like serine/threonine-protein kinase FLS2 [EC:2.7.11.1] | (RefSeq) LRR receptor-like serine/threonine-protein kinase FLS2 (A)	LRR receptor-like serine/threonine-protein kinase FLS2 [Chenopodium quinoa]	RecName: Full=LRR receptor-like serine/threonine-protein kinase FLS2; EC=2.7.11.1; AltName: Full=Protein FLAGELLIN-SENSING 2; AltName: Full=Protein FLAGELLIN-SENSITIVE 2; Flags: Precursor;	SubName: Full=Uncharacterized protein {ECO:0000313|EMBL:KNA06626.1};	--	GO:0005768,endosome; GO:0010008,endosome membrane; GO:0016021,integral component of membrane; GO:0016020,membrane; GO:0005886,plasma membrane; GO:0005524,ATP binding; GO:0004675,transmembrane receptor protein serine/threonine kinase activity; GO:0052544,defense response by callose deposition in cell wall; GO:0042742,defense response to bacterium; GO:0016045,detection of bacterium; GO:0006898,rece…	Leucine rich repeat
gene-LOC110690483	0.18	0.09	0.27	1.74	1.86	1.77	6	3	8	54	65	53	0.097	-3.363	6.09985e-09	8.43187e-07	down	NW_018744041.1	1592984	1595187	-	LOC110690483	--	--	uncharacterized protein LOC110690483 [Chenopodium quinoa]	--	SubName: Full=Uncharacterized protein {ECO:0000313|EMBL:KNA24206.1};	--	--	Hydrogenase/urease nickel incorporation, metallochaperone, hypA
gene-LOC110690487	0.22	0.43	0.27	0.95	0.69	1.46	12	23	13	48	39	71	0.284	-1.814	0.000585736	0.0174105	down	NW_018744041.1	1653785	1658976	-	LOC110690487	--	--	uncharacterized protein At2g33490-like [Chenopodium quinoa]	RecName: Full=Uncharacterized protein At2g33490;	SubName: Full=Uncharacterized protein {ECO:0000313|EMBL:KNA24211.1};	--	GO:0005886,plasma membrane	BAR domain of APPL family
gene-LOC110690490	39.15	51.64	57.29	32.41	18.81	15.19	1173	1515	1512	904	591	409	2.187	1.129	5.96551e-05	0.00293699	up	NW_018742329.1	4047598	4050047	+	LOC110690490	--	--	LOW QUALITY PROTEIN: uncharacterized protein ycf23-like [Chenopodium quinoa]	RecName: Full=Uncharacterized protein ycf23;	SubName: Full=Uncharacterized protein {ECO:0000313|EMBL:KNA11863.1};	--	GO:0009507,chloroplast; GO:0003824,catalytic activity	Protein of unknown function (DUF561)
gene-LOC110690492	42.51	66.71	56.34	24.24	23.47	30.49	1354	2081	1581	719	784	873	2.009	1.006	1.57509e-05	0.000964731	up	NW_018744041.1	1694955	1696932	-	LOC110690492	--	K00521 ferric-chelate reductase [EC:1.16.1.7] | (RefSeq) ferric reduction oxidase 7, chloroplastic-like (A)	NAC domain-containing protein 83-like [Chenopodium quinoa]	RecName: Full=NAC domain-containing protein 83 {ECO:0000303|PubMed:15029955}; Short=ANAC083 {ECO:0000303|PubMed:15029955}; AltName: Full=Protein VND-INTERACTING 2 {ECO:0000303|PubMed:20388856};	SubName: Full=Uncharacterized protein {ECO:0000313|EMBL:KNA24215.1};	--	GO:0005634,nucleus; GO:0003677,DNA binding; GO:0003700,DNA-binding transcription factor activity; GO:0010150,leaf senescence; GO:0045892,negative regulation of transcription, DNA-templated; GO:0009737,response to abscisic acid; GO:0009651,response to salt stress; GO:0006351,transcription, DNA-templated; GO:0016032,viral process; GO:0010089,xylem development	No apical meristem (NAM) protein
gene-LOC110690513	2.53	1.92	1.64	8.61	8.33	7.15	70	52	40	222	242	178	0.247	-2.016	3.57757e-10	6.33389e-08	down	NW_018744041.1	1900735	1904053	-	LOC110690513	--	--	uncharacterized protein LOC110690513 [Chenopodium quinoa]	--	SubName: Full=Uncharacterized protein {ECO:0000313|EMBL:KNA25617.1};	--	GO:0016831,carboxy-lyase activity; GO:0016787,hydrolase activity	Amidohydrolase
gene-LOC110690725	15.94	17.76	12.61	33.46	31.15	28.06	452	493	315	883	926	715	0.484	-1.048	1.43693e-06	0.000118448	down	NW_018742329.1	5113549	5118879	-	LOC110690725	--	K00679 phospholipid:diacylglycerol acyltransferase [EC:2.3.1.158] | (RefSeq) hypothetical protein (A)	GDSL esterase/lipase At5g45670-like [Chenopodium quinoa]	RecName: Full=GDSL esterase/lipase At5g45670; EC=3.1.1.-; AltName: Full=Extracellular lipase At5g45670; Flags: Precursor;	SubName: Full=Uncharacterized protein {ECO:0000313|EMBL:KNA14062.1};	--	GO:0005576,extracellular region; GO:0016788,hydrolase activity, acting on ester bonds; GO:0016042,lipid catabolic process	GDSL-like Lipase/Acylhydrolase
gene-LOC110690750	4.52	7.53	10.94	4.97	2.46	2.54	214	349	456	219	122	108	2.251	1.171	0.0025525	0.0488481	up	NW_018744062.1	1816264	1824724	-	LOC110690750	--	K14855 ribosome assembly protein 4 | (RefSeq) notchless protein homolog (A)	notchless protein homolog [Chenopodium quinoa]	RecName: Full=Notchless protein homolog {ECO:0000303|PubMed:23572950};	SubName: Full=Uncharacterized protein {ECO:0000313|EMBL:KNA23871.1};	Notchless-like WD40 repeat-containing protein	GO:0080008,Cul4-RING E3 ubiquitin ligase complex; GO:0005730,nucleolus; GO:0005840,ribosome; GO:0009553,embryo sac development; GO:0000027,ribosomal large subunit assembly	WD domain, G-beta repeat
gene-LOC110690807	5.45	6.37	9.13	2.53	1.63	3.44	118	135	174	51	37	67	2.656	1.409	0.000435525	0.0139508	up	NW_018744062.1	169110	170171	-	LOC110690807	--	--	uncharacterized protein LOC110690807 [Chenopodium quinoa]	--	SubName: Full=Uncharacterized protein {ECO:0000313|EMBL:KNA16582.1};	--	--	--
gene-LOC110690849	3.63	5.5	7.55	3.23	1.67	1.87	294	437	539	244	142	136	2.403	1.265	0.000208965	0.00788888	up	NW_018744066.1	297142	301478	+	LOC110690849	--	K17710 pentatricopeptide repeat domain-containing protein 1 | (RefSeq) pentatricopeptide repeat-containing protein At2g18940, chloroplastic-like (A)	pentatricopeptide repeat-containing protein At2g18940, chloroplastic-like [Chenopodium quinoa]	RecName: Full=Pentatricopeptide repeat-containing protein At2g18940, chloroplastic; Flags: Precursor;	SubName: Full=Uncharacterized protein {ECO:0000313|EMBL:KNA25392.1};	FOG: PPR repeat	GO:0009507,chloroplast; GO:0043231,intracellular membrane-bounded organelle; GO:0004519,endonuclease activity; GO:0003729,mRNA binding; GO:0003723,RNA binding; GO:0009451,RNA modification	PPR repeat family
gene-LOC110690852	7.32	4.99	9.66	3.49	2.5	2.32	232	155	270	103	83	66	2.611	1.385	0.00014012	0.00576047	up	NW_018744066.1	301755	304539	+	LOC110690852	--	K22074 NFU1 iron-sulfur cluster scaffold homolog, mitochondrial | (RefSeq) nifU-like protein 1, chloroplastic (A)	nifU-like protein 3, chloroplastic [Chenopodium quinoa]	RecName: Full=NifU-like protein 3, chloroplastic; Short=AtCNfu3; Short=AtCnfU-IVa; Flags: Precursor;	SubName: Full=Uncharacterized protein {ECO:0000313|EMBL:KNA25391.1};	NifU-like domain-containing proteins	GO:0009507,chloroplast; GO:0009570,chloroplast stroma; GO:0005506,iron ion binding; GO:0051536,iron-sulfur cluster binding; GO:0032947,protein-containing complex scaffold activity; GO:0005198,structural molecule activity; GO:0016226,iron-sulfur cluster assembly; GO:0048564,photosystem I assembly	NifU-like domain
gene-LOC110690946	15.85	14.17	12	37.86	33.79	27.17	571	500	381	1270	1277	880	0.416	-1.266	1.53461e-07	1.55802e-05	down	NW_018744066.1	1585573	1591761	-	LOC110690946	--	K14497 protein phosphatase 2C [EC:3.1.3.16] | (RefSeq) probable protein phosphatase 2C 6 (A)	probable protein phosphatase 2C 6 [Chenopodium quinoa]	RecName: Full=Probable protein phosphatase 2C 6; Short=OsPP2C06; EC=3.1.3.16;	SubName: Full=Uncharacterized protein {ECO:0000313|EMBL:KNA07758.1};	Serine/threonine protein phosphatase	GO:0046872,metal ion binding; GO:0004722,protein serine/threonine phosphatase activity	Protein phosphatase 2C
gene-LOC110690999	0.86	2.16	4.49	0.66	0.24	0.33	38	93	174	27	11	13	5.967	2.577	8.39157e-05	0.00384265	up	NW_018744066.1	2414929	2417087	+	LOC110690999	--	--	uncharacterized protein LOC110690999 [Chenopodium quinoa]	--	SubName: Full=Uncharacterized protein {ECO:0000313|EMBL:KNA09414.1};	--	--	--
gene-LOC110691223	6.06	10.88	10.74	4.98	3.23	2.18	403	708	629	308	225	130	2.585	1.37	3.6003e-05	0.00194287	up	NW_018744072.1	1686737	1693773	-	LOC110691223	--	K15925 alpha-D-xyloside xylohydrolase [EC:3.2.1.177] | (RefSeq) alpha-xylosidase 1-like (A)	alpha-xylosidase 1-like [Chenopodium quinoa]	RecName: Full=Alpha-xylosidase 1; EC=3.2.1.177; Flags: Precursor;	SubName: Full=Uncharacterized protein {ECO:0000313|EMBL:KNA22484.1};	Maltase glucoamylase and related hydrolases, glycosyl hydrolase family 31	GO:0048046,apoplast; GO:0005618,cell wall; GO:0009507,chloroplast; GO:0009505,plant-type cell wall; GO:0009506,plasmodesma; GO:0061634,alpha-D-xyloside xylohydrolase; GO:0046556,alpha-L-arabinofuranosidase activity; GO:0030246,carbohydrate binding; GO:0009044,xylan 1,4-beta-xylosidase activity; GO:0080176,xyloglucan 1,6-alpha-xylosidase activity; GO:0071555,cell wall organization; GO:0046686,resp…	Glycosyl hydrolases family 31
gene-LOC110691474	2.21	5.67	3.39	0.14	0.31	0.18	68	171	92	4	10	5	16.464	4.041	1.92208e-12	5.15519e-10	up	NW_018744080.1	2556036	2558485	-	LOC110691474	--	--	--	--	--	--	--	--
gene-LOC110691475	2.78	3.02	2.25	8.4	5.97	7.13	91	97	65	256	205	210	0.365	-1.453	2.68365e-08	3.23474e-06	down	NW_018744080.1	2581387	2586239	-	LOC110691475	--	K22455 estrogen receptor-binding fragment-associated gene 9 protein | (RefSeq) uncharacterized protein At3g61260-like (A)	remorin 4.1-like [Chenopodium quinoa]	RecName: Full=Remorin 4.1 {ECO:0000305}; Short=OsREM4.1 {ECO:0000303|PubMed:17984200}; AltName: Full=Remorin group 4 member 1 {ECO:0000303|PubMed:17984200};	SubName: Full=Uncharacterized protein {ECO:0000313|EMBL:CDP18653.1};	--	GO:0005886,plasma membrane; GO:0009738,abscisic acid-activated signaling pathway; GO:1900458,negative regulation of brassinosteroid mediated signaling pathway	Remorin, C-terminal region
gene-LOC110691480	0	0	0	2.03	1.21	1.91	0	0	0	55	37	50	0.004	-8.053	6.78877e-10	1.09412e-07	down	NW_018744080.1	2657915	2662930	-	LOC110691480	--	K03029 26S proteasome regulatory subunit N10 | (RefSeq) uncharacterized protein LOC110691480 (A)	uncharacterized protein LOC110691480 [Chenopodium quinoa]	RecName: Full=26S proteasome non-ATPase regulatory subunit 4 homolog; AltName: Full=26S proteasome regulatory subunit RPN10; Short=AtRPN10; AltName: Full=26S proteasome regulatory subunit S5A homolog; AltName: Full=Multiubiquitin chain-binding protein 1; Short=AtMCB1;	SubName: Full=Uncharacterized protein {ECO:0000313|EMBL:KNA10259.1}; Flags: Fragment;	26S proteasome regulatory complex, subunit RPN10/PSMD4	GO:0005829,cytosol; GO:0016020,membrane; GO:0005634,nucleus; GO:0000502,proteasome complex; GO:0001653,peptide receptor activity; GO:0031593,polyubiquitin modification-dependent protein binding; GO:0006974,cellular response to DNA damage stimulus; GO:0048366,leaf development; GO:0010150,leaf senescence; GO:0009555,pollen development; GO:0048528,post-embryonic root development; GO:0043248,proteaso…	von Willebrand factor type A domain
gene-LOC110691482	2.23	2.62	2.93	9.05	7.62	9.64	140	161	162	529	502	544	0.284	-1.814	5.46704e-16	2.28471e-13	down	NW_018744080.1	2786744	2791171	+	LOC110691482	--	K13412 calcium-dependent protein kinase [EC:2.7.11.1] | (RefSeq) calcium-dependent protein kinase 32-like (A)	calcium-dependent protein kinase 32-like [Chenopodium quinoa]	RecName: Full=Calcium-dependent protein kinase 32 {ECO:0000303|Ref.5}; EC=2.7.11.1 {ECO:0000305};	SubName: Full=Calcium dependent protein kinase 3 {ECO:0000313|EMBL:AFR11232.1};	Ca2+/calmodulin-dependent protein kinase, EF-Hand protein superfamily	GO:0005737,cytoplasm; GO:0005634,nucleus; GO:0005886,plasma membrane; GO:0009506,plasmodesma; GO:0005524,ATP binding; GO:0005509,calcium ion binding; GO:0004698,calcium-dependent protein kinase C activity; GO:0005516,calmodulin binding; GO:0004683,calmodulin-dependent protein kinase activity; GO:0009738,abscisic acid-activated signaling pathway; GO:0035556,intracellular signal transduction; GO:00…	Protein kinase domain
gene-LOC110691484	0.07	0.19	0.09	0.32	0.52	0.93	4	11	5	18	33	50	0.182	-2.461	0.000852413	0.0228325	down	NW_018744080.1	2808066	2815358	+	LOC110691484	--	K06617 raffinose synthase [EC:2.4.1.82] | (RefSeq) probable galactinol--sucrose galactosyltransferase 2 (A)	probable galactinol--sucrose galactosyltransferase 2 [Chenopodium quinoa]	RecName: Full=Probable galactinol--sucrose galactosyltransferase 2; EC=2.4.1.82; AltName: Full=Protein SEED IMBIBITION 2; AltName: Full=Raffinose synthase 2;	SubName: Full=Uncharacterized protein {ECO:0000313|EMBL:KNA06061.1};	--	GO:0009506,plasmodesma; GO:0052692,raffinose alpha-galactosidase activity; GO:0016757,transferase activity, transferring glycosyl groups; GO:0034484,raffinose catabolic process; GO:0080167,response to karrikin; GO:0006979,response to oxidative stress	Raffinose synthase or seed imbibition protein Sip1
gene-LOC110691495	2.58	2.14	1.92	4.85	6.91	6.45	32	26	21	56	90	72	0.35	-1.513	0.000428627	0.0137798	down	NW_018744080.1	2967356	2970002	+	LOC110691495	--	--	uncharacterized protein LOC110691495 [Chenopodium quinoa]	--	SubName: Full=Uncharacterized protein {ECO:0000313|EMBL:KNA16477.1};	--	GO:0016021,integral component of membrane	Protein of unknown function (DUF1138)
gene-LOC110691559	5.26	10.63	6.43	18.78	15.1	9.24	245	485	264	815	738	387	0.496	-1.011	0.00206682	0.0423096	down	NW_018744080.1	4046512	4050666	-	LOC110691559	--	K00006 glycerol-3-phosphate dehydrogenase (NAD+) [EC:1.1.1.8] | (RefSeq) glycerol-3-phosphate dehydrogenase [NAD(+)] GPDHC1, cytosolic-like (A)	glycerol-3-phosphate dehydrogenase [NAD(+)]	RecName: Full=Probable glycerol-3-phosphate dehydrogenase [NAD(+)] 1, cytosolic; EC=1.1.1.8;	RecName: Full=Glycerol-3-phosphate dehydrogenase [NAD(+)] {ECO:0000256|RuleBase:RU361243}; EC=1.1.1.8 {ECO:0000256|RuleBase:RU361243};	Glycerol-3-phosphate dehydrogenase/dihydroxyacetone 3-phosphate reductase	GO:0005829,cytosol; GO:0009331,glycerol-3-phosphate dehydrogenase complex; GO:0004367,glycerol-3-phosphate dehydrogenase [NAD+] activity; GO:0051287,NAD binding; GO:0005975,carbohydrate metabolic process; GO:0046168,glycerol-3-phosphate catabolic process	NAD-dependent glycerol-3-phosphate dehydrogenase C-terminus
gene-LOC110691573	0.29	0.29	0.26	1.09	0.51	1.15	14	14	11	49	26	50	0.3	-1.736	0.00139356	0.0323752	down	NW_018744080.1	4321397	4325265	-	LOC110691573	--	--	protein IQ-DOMAIN 14-like isoform X1 [Chenopodium quinoa]	RecName: Full=Protein IQ-DOMAIN 14;	SubName: Full=Uncharacterized protein {ECO:0000313|EMBL:KNA23626.1};	--	--	Protein of unknown function (DUF4005)
gene-LOC110691603	2.88	2.73	3.11	4.33	8.65	7.8	85	79	81	119	268	207	0.397	-1.331	0.000876394	0.0232707	down	NW_018744080.1	3590914	3592513	+	LOC110691603	--	K15078 structure-specific endonuclease subunit SLX1 [EC:3.6.1.-] | (RefSeq) putative disease resistance protein RGA1 (A)	putative disease resistance protein RGA1 [Chenopodium quinoa]	RecName: Full=Putative disease resistance protein RGA1; AltName: Full=RGA3-blb;	SubName: Full=Uncharacterized protein {ECO:0000313|EMBL:KNA13354.1};	Apoptotic ATPase	GO:0043531,ADP binding; GO:0005524,ATP binding; GO:0006952,defense response	NB-ARC domain
gene-LOC110691615	28.57	27.04	21.95	0.26	0.09	0.05	588	545	398	5	2	1	187.423	7.55	2.98568e-37	5.9614e-34	up	NW_018744080.1	4081431	4084887	+	LOC110691615	--	K01070 S-formylglutathione hydrolase [EC:3.1.2.12] | (RefSeq) S-formylglutathione hydrolase-like (A)	S-formylglutathione hydrolase-like [Chenopodium quinoa]	RecName: Full=S-formylglutathione hydrolase; Short=AtSFGH; EC=3.1.2.12; AltName: Full=Esterase D;	RecName: Full=S-formylglutathione hydrolase {ECO:0000256|RuleBase:RU363068}; EC=3.1.2.12 {ECO:0000256|RuleBase:RU363068};	Esterase D	GO:0048046,apoplast; GO:0052689,carboxylic ester hydrolase activity; GO:0018738,S-formylglutathione hydrolase activity; GO:0046294,formaldehyde catabolic process; GO:0046686,response to cadmium ion	Putative esterase
gene-LOC110691748	0.42	0.76	0.33	0	0	0	22	39	15	0	0	0	130.129	7.024	8.32277e-07	7.32741e-05	up	NW_018744092.1	835903	843122	-	LOC110691748	--	--	uncharacterized protein LOC110691748 [Chenopodium quinoa]	--	SubName: Full=Uncharacterized protein {ECO:0000313|EMBL:AFK44328.1};	--	--	--
gene-LOC110691760	0.3	0.12	0.2	4.03	5.47	3.64	10	4	6	125	191	109	0.046	-4.43	1.63517e-17	8.39543e-15	down	NW_018744092.1	1021802	1024038	-	LOC110691760	--	K19861 benzyl alcohol O-benzoyltransferase [EC:2.3.1.196 2.3.1.232] | (RefSeq) benzyl alcohol O-benzoyltransferase-like (A)	benzyl alcohol O-benzoyltransferase-like [Chenopodium quinoa]	RecName: Full=Benzyl alcohol O-benzoyltransferase; EC=2.3.1.196; AltName: Full=Benzoyl coenzyme A:benzyl alcohol benzoyl transferase;	SubName: Full=Uncharacterized protein {ECO:0000313|EMBL:KNA04425.1};	--	GO:0016747,transferase activity, transferring acyl groups other than amino-acyl groups	Transferase family
gene-LOC110691815	10.94	7.62	10.42	4.59	4.69	3.37	542	370	455	212	244	150	2.243	1.165	0.00012147	0.00511798	up	NW_018744092.1	2077203	2084856	+	LOC110691815	--	--	--	--	--	--	--	--
gene-LOC110691852	0.32	0.15	0.36	0.66	1.17	1.11	15	7	15	29	58	47	0.271	-1.885	0.00188746	0.0399501	down	NW_018744092.1	2803377	2807501	+	LOC110691852	--	--	zinc finger CCCH domain-containing protein 18-like [Chenopodium quinoa]	RecName: Full=Zinc finger CCCH domain-containing protein 18; Short=AtC3H18; EC=3.1.-.-;	SubName: Full=Uncharacterized protein {ECO:0000313|EMBL:KNA19842.1};	--	GO:0003677,DNA binding; GO:0046872,metal ion binding; GO:0004518,nuclease activity; GO:0003723,RNA binding	OST-HTH/LOTUS domain
gene-LOC110691897	26.72	18.12	16.06	34.58	38.72	47.72	1286	854	681	1550	1955	2065	0.49	-1.029	0.00212886	0.0430564	down	NW_018744092.1	3571422	3575774	+	LOC110691897	--	--	uncharacterized protein ycf45-like [Chenopodium quinoa]	RecName: Full=Uncharacterized protein ycf45; AltName: Full=ORF565;	SubName: Full=Uncharacterized protein {ECO:0000313|EMBL:KNA20588.1};	--	GO:0009507,chloroplast; GO:0005524,ATP binding; GO:0003676,nucleic acid binding	AAA domain
gene-LOC110691904	0.81	0.3	0.54	1.5	1.68	3.51	22	8	13	38	48	86	0.241	-2.054	0.00141539	0.0326503	down	NW_018744092.1	3694216	3696055	-	LOC110691904	--	K05933 aminocyclopropanecarboxylate oxidase [EC:1.14.17.4] | (RefSeq) LOW QUALITY PROTEIN: 1-aminocyclopropane-1-carboxylate oxidase 4-like (A)	LOW QUALITY PROTEIN: 1-aminocyclopropane-1-carboxylate oxidase 4-like [Chenopodium quinoa]	RecName: Full=1-aminocyclopropane-1-carboxylate oxidase 4; Short=ACC oxidase 4; EC=1.14.17.4; AltName: Full=Ethylene-forming enzyme; Short=EFE;	SubName: Full=Uncharacterized protein {ECO:0000313|EMBL:KNA06323.1};	Iron/ascorbate family oxidoreductases	GO:0009815,1-aminocyclopropane-1-carboxylate oxidase activity; GO:0031418,L-ascorbic acid binding; GO:0046872,metal ion binding; GO:0009693,ethylene biosynthetic process	2OG-Fe(II) oxygenase superfamily
gene-LOC110691946	61.7	48.71	58.06	15.4	20.02	27.08	1807	1397	1498	420	615	713	2.589	1.372	3.05503e-05	0.00169441	up	NW_018744092.1	4214487	4217721	-	LOC110691946	--	K05275 pyridoxine 4-dehydrogenase [EC:1.1.1.65] | (RefSeq) pyridoxal reductase, chloroplastic (A)	uncharacterized oxidoreductase At1g06690, chloroplastic-like [Chenopodium quinoa]	RecName: Full=Uncharacterized oxidoreductase At1g06690, chloroplastic; EC=1.-.-.-; Flags: Precursor;	SubName: Full=Uncharacterized protein {ECO:0000313|EMBL:KNA25596.1};	Voltage-gated shaker-like K+ channel, subunit beta/KCNAB	GO:0009507,chloroplast; GO:0009941,chloroplast envelope; GO:0009535,chloroplast thylakoid membrane; GO:0010287,plastoglobule; GO:0016491,oxidoreductase activity	Aldo/keto reductase family
gene-LOC110691963	0.47	0.62	0.13	0	0	0	17	22	4	0	0	0	73.565	6.201	0.000194502	0.0074445	up	NW_018744092.1	4444480	4452773	-	LOC110691963	--	--	--	--	--	--	--	--
gene-LOC110692000	30.56	49.75	87.16	33.04	13.82	16.32	1394	2222	3502	1403	661	669	2.603	1.38	0.00100144	0.0255366	up	NW_018744092.1	5180102	5185721	-	LOC110692000	--	K11294 nucleolin | (RefSeq) nucleolin 1-like (A)	nucleolin 1-like [Chenopodium quinoa]	RecName: Full=Nucleolin 2; AltName: Full=Protein NUCLEOLIN LIKE 2;	SubName: Full=Uncharacterized protein {ECO:0000313|EMBL:KNA22717.1};	Nuclear localization sequence binding protein	GO:0005730,nucleolus; GO:0003723,RNA binding; GO:0006364,rRNA processing	RNA recognition motif. (a.k.a. RRM, RBD, or RNP domain)
gene-LOC110692010	2.94	13.38	1.5	0.47	0.84	0.52	100	446	45	15	30	16	8.744	3.128	2.30229e-05	0.00133674	up	NW_018744092.1	5349816	5357038	-	LOC110692010	--	--	photosystem II stability/assembly factor HCF136, chloroplastic-like [Chenopodium quinoa]	RecName: Full=Photosystem II stability/assembly factor HCF136, chloroplastic; Flags: Precursor;	SubName: Full=Uncharacterized protein {ECO:0000313|EMBL:KNA22712.1};	Sortilin and related receptors	GO:0009507,chloroplast; GO:0009941,chloroplast envelope; GO:0009570,chloroplast stroma; GO:0009533,chloroplast stromal thylakoid; GO:0009534,chloroplast thylakoid; GO:0009535,chloroplast thylakoid membrane; GO:0009523,photosystem II; GO:0009579,thylakoid; GO:0031977,thylakoid lumen; GO:0015979,photosynthesis; GO:0009657,plastid organization; GO:0006461,NA; GO:0046686,response to cadmium ion; GO:0…	Photosynthesis system II assembly factor YCF48
gene-LOC110692045	0	0.09	0	1.35	1.02	0.78	0	2	0	27	23	15	0.029	-5.084	7.07153e-05	0.00335734	down	NW_018744092.1	5122508	5123880	+	LOC110692045	--	K12874 intron-binding protein aquarius | (RefSeq) LOW QUALITY PROTEIN: intron-binding protein aquarius-like (A)	uncharacterized protein LOC110692045 [Chenopodium quinoa]	--	SubName: Full=Uncharacterized protein {ECO:0000313|EMBL:CCA66044.1};	FOG: Reverse transcriptase	GO:0003676,nucleic acid binding	Reverse transcriptase (RNA-dependent DNA polymerase)
gene-LOC110692065	0.29	1.24	0.49	5.61	4.16	3.26	4	17	6	73	61	41	0.147	-2.765	2.82799e-06	0.000216712	down	NW_018744092.1	3291497	3292880	+	LOC110692065	--	--	glycine-rich protein 3 short isoform-like [Chenopodium quinoa]	--	--	--	--	Glycine rich protein family
gene-LOC110692236	2.4	0.77	2.4	0.47	0.18	0.21	76	24	67	14	6	6	6.578	2.718	0.000102922	0.00448365	up	NW_018744100.1	31052	54545	+	LOC110692236	--	K00417 ubiquinol-cytochrome c reductase subunit 7 | (RefSeq) cytochrome b-c1 complex subunit 7-2-like (A)	uncharacterized protein LOC110692236 [Chenopodium quinoa]	--	SubName: Full=Uncharacterized protein {ECO:0000313|EMBL:KNA22300.1};	--	--	--
gene-LOC110692320	0.38	0.17	1.97	2.24	8.32	5.59	16	7	74	89	372	214	0.145	-2.789	0.000793876	0.021718	down	NW_018742332.1	33099	38714	-	LOC110692320	--	K01913 acetate---CoA ligase [EC:6.2.1.1] | (RefSeq) acetate/butyrate--CoA ligase AAE7, peroxisomal-like (A)	acetate/butyrate--CoA ligase AAE7, peroxisomal-like [Chenopodium quinoa]	RecName: Full=Acetate/butyrate--CoA ligase AAE7, peroxisomal; EC=6.2.1.1; EC=6.2.1.2; AltName: Full=AMP-binding protein 7; Short=AtAMPBP7; AltName: Full=Acetyl-CoA synthetase; AltName: Full=Acyl-activating enzyme 7; AltName: Full=Butyryl-CoA synthetase; AltName: Full=Protein ACETATE NON-UTILIZING 1;	SubName: Full=acetate/butyrate--CoA ligase AAE7, peroxisomal {ECO:0000313|RefSeq:XP_008438938.1};	Acyl-CoA synthetase	GO:0005777,peroxisome; GO:0003987,acetate-CoA ligase activity; GO:0047760,butyrate-CoA ligase activity; GO:0006083,acetate metabolic process; GO:0019605,butyrate metabolic process; GO:0006097,glyoxylate cycle	AMP-binding enzyme
gene-LOC110692481	22.35	28.69	47.1	21.33	10.49	8.8	941	1183	1747	836	463	333	2.386	1.255	0.000978254	0.0252055	up	NW_018744113.1	1349414	1354382	-	LOC110692481	--	K04077 chaperonin GroEL | (RefSeq) chaperonin CPN60, mitochondrial-like (A)	chaperonin CPN60, mitochondrial-like [Chenopodium quinoa]	RecName: Full=Chaperonin CPN60, mitochondrial; AltName: Full=HSP60; Flags: Precursor;	SubName: Full=Uncharacterized protein {ECO:0000313|EMBL:KNA24891.1};	Mitochondrial chaperonin, Cpn60/Hsp60p	GO:0005829,cytosol; GO:0022626,cytosolic ribosome; GO:0005759,mitochondrial matrix; GO:0005739,mitochondrion; GO:0042788,polysomal ribosome; GO:0005774,vacuolar membrane; GO:0005524,ATP binding; GO:0005507,copper ion binding; GO:0044183,protein binding involved in protein folding; GO:0003735,structural constituent of ribosome; GO:0051082,unfolded protein binding; GO:0006458,'de novo' protein fold…	TCP-1/cpn60 chaperonin family
gene-LOC110692627	4.5	6.94	7.12	3.55	1.55	1.6	94	142	131	69	34	30	2.718	1.442	0.000268262	0.00962209	up	NW_018742334.1	313283	317256	+	LOC110692627	--	K05019 chloride channel, nucleotide-sensitive, 1A | (RefSeq) chloride conductance regulatory protein ICln-like (A)	chloride conductance regulatory protein ICln-like [Chenopodium quinoa]	RecName: Full=Chloride conductance regulatory protein ICln; Short=I(Cln); AltName: Full=Chloride ion current inducer protein; Short=ClCI;	SubName: Full=Uncharacterized protein {ECO:0000313|EMBL:KNA17726.1};	Chloride ion current inducer protein	GO:0005829,cytosol; GO:0034709,methylosome; GO:0005634,nucleus; GO:0034715,pICln-Sm protein complex; GO:0005886,plasma membrane; GO:0006884,cell volume homeostasis; GO:0006821,chloride transport; GO:0000387,spliceosomal snRNP assembly	Regulator of volume decrease after cellular swelling
gene-LOC110692677	4.05	7.44	5.35	17.06	7.78	14.44	74	133	86	290	149	237	0.414	-1.272	0.000328006	0.0112809	down	NW_018744128.1	324400	325295	+	LOC110692677	--	--	classical arabinogalactan protein 10-like [Chenopodium quinoa]	--	--	--	--	--
gene-LOC110692727	1.05	1.07	0.75	1.84	3.44	3.01	35	35	22	57	120	90	0.33	-1.601	0.000468371	0.014779	down	NW_018744128.1	990703	994486	+	LOC110692727	--	--	CASP-like protein 5C1 [Chenopodium quinoa]	RecName: Full=CASP-like protein ARALYDRAFT_485429;	RecName: Full=CASP-like protein {ECO:0000256|RuleBase:RU361233};	--	GO:0016021,integral component of membrane; GO:0005886,plasma membrane	Domain of unknown function (DUF588)
gene-LOC110692760	7.85	8.45	4.71	13.6	25.3	17.8	261	275	138	421	882	532	0.352	-1.507	9.09486e-05	0.00408588	down	NW_018744128.1	1567266	1569888	+	LOC110692760	--	K09422 transcription factor MYB, plant | (RefSeq) protein ODORANT1-like (A)	protein ODORANT1-like [Chenopodium quinoa]	RecName: Full=Protein ODORANT1; AltName: Full=MYB-like protein ODO1;	SubName: Full=Uncharacterized protein {ECO:0000313|EMBL:KNA15716.1};	Transcription factor, Myb superfamily	GO:0005634,nucleus; GO:0003677,DNA binding; GO:0006355,regulation of transcription, DNA-templated; GO:0006351,transcription, DNA-templated	Myb-like DNA-binding domain
gene-LOC110692766	0.96	0.36	0.4	0.85	2.7	4.05	52	19	19	43	153	197	0.219	-2.193	0.00170626	0.0374606	down	NW_018744128.1	1600942	1611375	-	LOC110692766	--	--	--	--	--	--	--	--
gene-LOC110692785	1.1	1.43	0.88	6.61	7.61	9.44	41	52	29	229	297	316	0.137	-2.863	3.01496e-17	1.50497e-14	down	NW_018744128.1	1763090	1771760	+	LOC110692785	--	--	uncharacterized protein LOC110692785 isoform X1 [Chenopodium quinoa]	--	SubName: Full=uncharacterized protein LOC109001092 {ECO:0000313|RefSeq:XP_018833773.1};	--	--	Bacterial extracellular solute-binding protein
gene-LOC110692817	0.27	0.37	0.26	0.67	0.83	0.58	27	37	23	63	89	53	0.41	-1.287	0.00125395	0.0301452	down	NW_018742334.1	927935	933181	-	LOC110692817	--	K15078 structure-specific endonuclease subunit SLX1 [EC:3.6.1.-] | (RefSeq) putative disease resistance protein RGA3 (A)	putative disease resistance protein RGA3 [Chenopodium quinoa]	RecName: Full=Putative disease resistance protein RGA3; AltName: Full=Blight resistance protein B149; AltName: Full=RGA1-blb;	SubName: Full=NBS-LRR type resistance protein {ECO:0000313|EMBL:ABJ99599.1};	Apoptotic ATPase	GO:0043531,ADP binding; GO:0005524,ATP binding; GO:0006952,defense response	NB-ARC domain
gene-LOC110692824	0.11	0	0.05	0.76	0.91	0.4	5	0	2	32	43	16	0.079	-3.671	0.000134127	0.00556784	down	NW_018744128.1	2173695	2175903	+	LOC110692824	--	K22395 cinnamyl-alcohol dehydrogenase [EC:1.1.1.195] | (RefSeq) berberine bridge enzyme-like 15 (A)	berberine bridge enzyme-like 15 [Chenopodium quinoa]	RecName: Full=Berberine bridge enzyme-like 15 {ECO:0000303|PubMed:26037923}; Short=AtBBE-like 15 {ECO:0000303|PubMed:26037923}; EC=1.1.1.194 {ECO:0000269|PubMed:26037923}; EC=1.1.1.195 {ECO:0000269|PubMed:26037923}; AltName: Full=Protein EMBRYO SAC DEVELOPMENT ARREST 28 {ECO:0000303|PubMed:15634699}; AltName: Full=Protein MATERNAL EFFECT EMBRYO ARREST 23 {ECO:0000303|PubMed:15634699}; Flags: Prec…	SubName: Full=Uncharacterized protein {ECO:0000313|EMBL:KNA09168.1};	--	GO:0005618,cell wall; GO:0005576,extracellular region; GO:0009506,plasmodesma; GO:0045551,cinnamyl-alcohol dehydrogenase activity; GO:0050268,coniferyl-alcohol dehydrogenase activity; GO:0050660,flavin adenine dinucleotide binding; GO:0052747,sinapyl alcohol dehydrogenase activity; GO:0009793,embryo development ending in seed dormancy; GO:0010197,polar nucleus fusion	FAD binding domain
gene-LOC110692825	0.44	0.34	0.34	15.49	17.87	16.42	12	9	8	391	508	400	0.022	-5.53	8.99335e-48	2.93837e-44	down	NW_018744128.1	2169190	2172425	+	LOC110692825	--	--	protein LOW PSII ACCUMULATION 3, chloroplastic isoform X1 [Chenopodium quinoa]	RecName: Full=Protein LOW PSII ACCUMULATION 3, chloroplastic; Flags: Precursor;	SubName: Full=Uncharacterized protein {ECO:0000313|EMBL:KNA09169.1};	--	GO:0009507,chloroplast; GO:0009570,chloroplast stroma; GO:0009535,chloroplast thylakoid membrane; GO:0009735,response to cytokinin	Domain of unknown function (DUF1995)
gene-LOC110692918	5.93	7.78	2	11.26	11.62	27.29	178	229	53	315	366	737	0.296	-1.756	0.00160939	0.0358597	down	NW_018744137.1	228940	237324	+	LOC110692918	--	K24028 salicylic acid 3-hydroxylase [EC:1.14.11.-] | (RefSeq) protein DOWNY MILDEW RESISTANCE 6 isoform X1 (A)	protein DOWNY MILDEW RESISTANCE 6 isoform X1 [Chenopodium quinoa]	RecName: Full=Protein DOWNY MILDEW RESISTANCE 6 {ECO:0000303|PubMed:15986928}; Short=AtDMR6 {ECO:0000303|PubMed:15986928}; EC=1.14.11.- {ECO:0000255|PROSITE-ProRule:PRU00805}; AltName: Full=2-oxoglutarate (2OG)-Fe(II) oxygenase-like protein DMR6 {ECO:0000303|PubMed:18248595}; AltName: Full=Salicylate 3-hydroxylase DMR6 {ECO:0000305}; Short=S3H DMR6 {ECO:0000305}; Short=SA 3-hydroxylase DMR6 {ECO:…	SubName: Full=Uncharacterized protein {ECO:0000313|EMBL:KNA09133.1};	Iron/ascorbate family oxidoreductases	GO:0033759,flavone synthase activity; GO:0046872,metal ion binding; GO:0034785,salicylate 5-hydroxylase activity; GO:0042742,defense response to bacterium; GO:0002229,defense response to oomycetes; GO:0009813,flavonoid biosynthetic process; GO:0010150,leaf senescence; GO:0009617,response to bacterium; GO:0009620,response to fungus; GO:0002239,response to oomycetes; GO:0009751,response to salicyli…	2OG-Fe(II) oxygenase superfamily
gene-LOC110692966	1.6	2.77	2.37	0.75	0.73	0.81	46	78	60	20	22	21	2.8	1.486	0.000298605	0.010378	up	NW_018742334.1	1055993	1061164	-	LOC110692966	--	--	--	--	--	--	--	--
gene-LOC110693013	2.39	4.73	6.95	2.55	1.28	1.25	128	248	328	127	72	60	2.695	1.43	0.00111121	0.0275236	up	NW_018744137.1	1180319	1187311	-	LOC110693013	--	K17681 ATPase family AAA domain-containing protein 3A/B | (RefSeq) ATPase family AAA domain-containing protein 3-like (A)	ATPase family AAA domain-containing protein 3-like [Chenopodium quinoa]	RecName: Full=26S proteasome regulatory subunit 6A homolog; AltName: Full=LEMA-1; AltName: Full=Mg(2+)-dependent ATPase 1; AltName: Full=Tat-binding protein homolog 1; Short=TBP-1;	SubName: Full=AAA+-type ATPase {ECO:0000313|EMBL:PIN23506.1};	AAA+-type ATPase	GO:0031597,cytosolic proteasome complex; GO:0031595,nuclear proteasome complex; GO:0008540,proteasome regulatory particle, base subcomplex; GO:0005524,ATP binding; GO:0036402,proteasome-activating ATPase activity; GO:0017025,TBP-class protein binding; GO:0045899,positive regulation of RNA polymerase II transcriptional preinitiation complex assembly; GO:0030433,ubiquitin-dependent ERAD pathway	Domain of unknown function (DUF3523)
gene-LOC110693031	6.86	2.86	1.36	0	0	0	120	49	21	0	0	0	339.435	8.407	5.71095e-09	8.01763e-07	up	NW_018742334.1	1171595	1172826	+	LOC110693031	--	--	jasmonate-induced protein homolog [Chenopodium quinoa]	RecName: Full=Jasmonate-induced protein homolog;	SubName: Full=Uncharacterized protein {ECO:0000313|EMBL:KNA17196.1};	--	--	--
gene-LOC110693046	12.81	3.84	1.79	0	0.16	0.06	235	69	29	0	3	1	82.509	6.366	9.16792e-09	1.21138e-06	up	NW_018742334.1	1176143	1177343	+	LOC110693046	--	--	jasmonate-induced protein homolog [Chenopodium quinoa]	RecName: Full=Jasmonate-induced protein homolog;	SubName: Full=Uncharacterized protein {ECO:0000313|EMBL:KNA05789.1};	--	--	--
gene-LOC110693093	0.48	0.02	0.38	0	0	0	29	1	20	0	0	0	93.093	6.541	0.000478511	0.0150461	up	NW_018744137.1	642196	645499	-	LOC110693093	--	K13457 disease resistance protein RPM1 | (RefSeq) disease resistance protein RPM1-like (A)	probable disease resistance protein RXW24L [Chenopodium quinoa]	RecName: Full=Disease resistance RPP8-like protein 3;	SubName: Full=Uncharacterized protein {ECO:0000313|EMBL:KNA24581.1};	Apoptotic ATPase	GO:0005886,plasma membrane; GO:0043531,ADP binding; GO:0005524,ATP binding; GO:0006952,defense response; GO:0007165,signal transduction	NB-ARC domain
gene-LOC110693108	0	0.02	0	0.12	0.52	0.59	0	1	0	5	24	23	0.019	-5.682	0.000289907	0.0101989	down	NW_018744137.1	1603743	1606047	-	LOC110693108	--	K12524 bifunctional aspartokinase / homoserine dehydrogenase 1 [EC:2.7.2.4 1.1.1.3] | (RefSeq) bifunctional aspartokinase/homoserine dehydrogenase 2, chloroplastic-like (A)	zinc finger MYM-type protein 1-like [Chenopodium quinoa]	--	SubName: Full=OSJNBb0016D16.6 protein {ECO:0000313|EMBL:CAE04315.1};	--	GO:0005737,cytoplasm; GO:0005654,nucleoplasm; GO:0003677,DNA binding; GO:0046983,protein dimerization activity; GO:0000981,DNA-binding transcription factor activity, RNA polymerase II-specific	Domain of unknown function (DUF4371)
gene-LOC110693171	21.89	15.54	10.7	28.88	66.76	62.08	302	210	130	371	966	770	0.292	-1.776	0.00013501	0.0055959	down	NW_018744143.1	812907	813583	-	LOC110693171	--	K10840 centrin-2 | (RefSeq) calcium-binding protein PBP1-like (A)	calcium-binding protein PBP1-like [Chenopodium quinoa]	RecName: Full=Calcium-binding protein PBP1; AltName: Full=KIC-related protein 2; AltName: Full=PINOID-binding protein 1;	SubName: Full=Uncharacterized protein {ECO:0000313|EMBL:KNA11677.1};	Ca2+-binding protein (centrin/caltractin), EF-Hand superfamily protein	GO:0005509,calcium ion binding; GO:0009733,response to auxin	EF-hand domain pair
gene-LOC110693238	0.43	0.93	0.59	1.83	1.54	0.91	53	112	64	210	199	101	0.435	-1.201	0.00143547	0.0330076	down	NW_018744143.1	2024036	2041999	-	LOC110693238	--	K13459 disease resistance protein RPS2 | (RefSeq) probable disease resistance protein At1g12280 (A)	uncharacterized protein LOC110693238 isoform X1 [Chenopodium quinoa]	RecName: Full=Probable disease resistance protein At4g27220;	SubName: Full=Uncharacterized protein {ECO:0000313|EMBL:KMT10880.1};	Apoptotic ATPase	GO:0005886,plasma membrane; GO:0043531,ADP binding; GO:0005524,ATP binding; GO:0006952,defense response; GO:0007165,signal transduction	NB-ARC domain
gene-LOC110693241	1.01	0.66	1.04	1.76	2.64	2.3	42	27	38	68	115	86	0.39	-1.36	0.00162051	0.0360404	down	NW_018744143.1	2119306	2123086	-	LOC110693241	--	--	--	--	--	--	--	--
gene-LOC110693427	0.13	0.16	0.13	0.31	0.42	1.83	6	7	5	13	20	74	0.153	-2.711	0.00206242	0.042274	down	NW_018744151.1	147584	152011	-	LOC110693427	--	--	--	--	--	--	--	--
gene-LOC110693435	0.14	0.59	0.69	0	0	0.04	4	17	18	0	0	1	34.794	5.121	0.00141365	0.0326503	up	NW_018744151.1	84466	98818	+	LOC110693435	--	--	--	--	--	--	--	--
gene-LOC110693443	0	0	0	0.08	0.27	0.4	0	0	0	3	12	15	0.017	-5.86	0.000995333	0.0254788	down	NW_018744151.1	154828	157879	-	LOC110693443	--	--	--	--	--	--	--	--
gene-LOC110693462	12.41	21.93	10.13	6.73	2.42	2.8	626	1083	450	316	128	127	3.664	1.873	6.72331e-06	0.000451655	up	NW_018744151.1	505519	528808	-	LOC110693462	--	K14175 (3S,6E)-nerolidol synthase [EC:4.2.3.48] | (RefSeq) (3S,6E)-nerolidol synthase 1-like (A)	(3S,6E)-nerolidol synthase 1-like [Chenopodium quinoa]	RecName: Full=(3S,6E)-nerolidol synthase 1; Short=FaNES1; EC=4.2.3.48;	SubName: Full=Uncharacterized protein {ECO:0000313|EMBL:KMT04064.1};	--	GO:0005829,cytosol; GO:0000287,magnesium ion binding; GO:0010333,terpene synthase activity; GO:0016114,terpenoid biosynthetic process	Terpene synthase family, metal binding domain
gene-LOC110693536	0.31	0.19	0.25	0.68	2.28	3.05	17	10	12	34	129	148	0.119	-3.07	4.76639e-06	0.000340565	down	NW_018744151.1	1715407	1719172	-	LOC110693536	--	--	uncharacterized protein LOC110693536 [Chenopodium quinoa]	--	SubName: Full=Uncharacterized protein {ECO:0000313|EMBL:KMS96794.1};	--	GO:0016021,integral component of membrane	Cotton fibre expressed protein
gene-LOC110693557	12.54	8.51	9.1	12.84	39.14	34.06	921	612	589	878	3015	2249	0.333	-1.587	0.000809247	0.0219836	down	NW_018744151.1	2255801	2267969	-	LOC110693557	--	K18643 katanin p80 WD40 repeat-containing subunit B1 | (RefSeq) katanin p80 WD40 repeat-containing subunit B1 homolog isoform X1 (A)	katanin p80 WD40 repeat-containing subunit B1 homolog isoform X1 [Chenopodium quinoa]	RecName: Full=Katanin p80 WD40 repeat-containing subunit B1 homolog {ECO:0000255|HAMAP-Rule:MF_03022};	RecName: Full=Katanin p80 WD40 repeat-containing subunit B1 homolog {ECO:0000256|HAMAP-Rule:MF_03022};	Microtubule severing protein katanin p80 subunit B (contains WD40 repeats)	GO:0080008,Cul4-RING E3 ubiquitin ligase complex; GO:0008352,katanin complex; GO:0005874,microtubule; GO:0008017,microtubule binding; GO:0043622,cortical microtubule organization; GO:0051013,microtubule severing	con80 domain of Katanin
gene-LOC110693567	1.53	3.34	1.91	0.82	0.4	0.15	58	124	64	29	16	5	4.825	2.27	0.000132092	0.00550102	up	NW_018744151.1	2440622	2445194	+	LOC110693567	--	K16297 serine carboxypeptidase-like clade II [EC:3.4.16.-] | (RefSeq) serine carboxypeptidase-like 31 (A)	serine carboxypeptidase-like 31 [Chenopodium quinoa]	RecName: Full=Serine carboxypeptidase-like 31; EC=3.4.16.-; Flags: Precursor;	RecName: Full=Carboxypeptidase {ECO:0000256|RuleBase:RU361156}; EC=3.4.16.- {ECO:0000256|RuleBase:RU361156};	Serine carboxypeptidases (lysosomal cathepsin A)	GO:0005576,extracellular region; GO:0005773,vacuole; GO:0004185,serine-type carboxypeptidase activity; GO:0051603,proteolysis involved in cellular protein catabolic process	Serine carboxypeptidase
gene-LOC110693605	0.98	0.75	1.06	2.38	1.98	2.24	43	32	41	97	91	88	0.412	-1.279	0.000264871	0.009529	down	NW_018744151.1	3020552	3031862	+	LOC110693605	--	K01466 allantoinase [EC:3.5.2.5] | (RefSeq) allantoinase-like isoform X1 (A)	allantoinase-like isoform X2 [Chenopodium quinoa]	RecName: Full=Allantoinase; Short=AtALN; EC=3.5.2.5;	SubName: Full=Uncharacterized protein {ECO:0000313|EMBL:KNA14579.1};	Dihydroorotase and related enzymes	GO:0005783,endoplasmic reticulum; GO:0004038,allantoinase activity; GO:0050897,cobalt ion binding; GO:0008270,zinc ion binding; GO:0000256,allantoin catabolic process; GO:0006995,cellular response to nitrogen starvation; GO:0006145,purine nucleobase catabolic process; GO:0010136,ureide catabolic process	Amidohydrolase family
gene-LOC110693797	0	0	0.06	4.28	3.8	2.72	0	0	1	75	75	46	0.005	-7.535	2.98385e-09	4.46831e-07	down	NW_018744155.1	218761	226975	-	LOC110693797	--	--	ergosterol biosynthetic protein 28-like [Chenopodium quinoa]	RecName: Full=Ergosterol biosynthetic protein 28;	SubName: Full=Uncharacterized protein {ECO:0000313|EMBL:KCW68588.1};	Predicted membrane protein	GO:0005789,endoplasmic reticulum membrane; GO:0016021,integral component of membrane; GO:0030674,protein binding, bridging; GO:0006696,ergosterol biosynthetic process	Erg28 like protein
gene-LOC110693810	0	0.04	0	3.61	1.37	1.69	0	1	0	84	36	38	0.007	-7.212	5.2559e-08	6.05439e-06	down	NW_018744167.1	60022	61847	-	LOC110693810	--	--	--	--	--	--	--	--
gene-LOC110693855	1.89	3.12	5.97	1.19	0.93	1.14	114	184	317	67	59	62	3.208	1.682	0.00015818	0.00633073	up	NW_018742345.1	202125	207839	-	LOC110693855	--	K17964 leucine-rich PPR motif-containing protein, mitochondrial | (RefSeq) hypothetical protein (A)	pentatricopeptide repeat-containing protein At3g49240-like [Chenopodium quinoa]	RecName: Full=Pentatricopeptide repeat-containing protein At3g49240, mitochondrial; AltName: Full=Protein EMBRYO DEFECTIVE 1796; Flags: Precursor;	SubName: Full=Uncharacterized protein {ECO:0000313|EMBL:KNA19069.1};	FOG: PPR repeat	GO:0009507,chloroplast; GO:0005739,mitochondrion; GO:0005524,ATP binding; GO:0004519,endonuclease activity; GO:0003723,RNA binding; GO:0009793,embryo development ending in seed dormancy; GO:0009960,endosperm development; GO:0006349,regulation of gene expression by genetic imprinting; GO:0009451,RNA modification	PPR repeat family
gene-LOC110693867	20.6	29.85	25.03	17.46	6.55	9.42	270	383	289	213	90	111	2.224	1.153	0.000831092	0.0223741	up	NW_018742204.1	16121492	16122134	-	LOC110693867	--	--	uncharacterized protein LOC110693867 [Chenopodium quinoa]	--	SubName: Full=Uncharacterized protein {ECO:0000313|EMBL:KMS97389.1};	--	--	DVL family
gene-LOC110693889	5.14	7.78	2.85	5.45	23.58	29.09	321	476	157	317	1544	1633	0.249	-2.006	0.000934628	0.0243586	down	NW_018744167.1	2192536	2199350	+	LOC110693889	--	K01187 alpha-glucosidase [EC:3.2.1.20] | (RefSeq) alpha-glucosidase-like (A)	alpha-glucosidase-like [Chenopodium quinoa]	RecName: Full=Alpha-glucosidase; EC=3.2.1.20; AltName: Full=Maltase; Flags: Precursor;	SubName: Full=Uncharacterized protein {ECO:0000313|EMBL:KNA07073.1};	Maltase glucoamylase and related hydrolases, glycosyl hydrolase family 31	GO:0004558,alpha-1,4-glucosidase activity; GO:0030246,carbohydrate binding; GO:0032450,maltose alpha-glucosidase activity	Glycosyl hydrolases family 31
gene-LOC110693890	2.34	1.74	1.9	2.69	4.82	13.06	157	114	112	168	339	787	0.275	-1.861	0.00130559	0.0310132	down	NW_018744167.1	2235411	2239872	+	LOC110693890	--	K01187 alpha-glucosidase [EC:3.2.1.20] | (RefSeq) LOW QUALITY PROTEIN: alpha-glucosidase-like (A)	LOW QUALITY PROTEIN: alpha-glucosidase-like [Chenopodium quinoa]	RecName: Full=Alpha-glucosidase; EC=3.2.1.20; AltName: Full=Maltase; Flags: Precursor;	SubName: Full=Uncharacterized protein {ECO:0000313|EMBL:KNA17111.1};	Maltase glucoamylase and related hydrolases, glycosyl hydrolase family 31	GO:0004558,alpha-1,4-glucosidase activity; GO:0030246,carbohydrate binding; GO:0032450,maltose alpha-glucosidase activity	Glycosyl hydrolases family 31
gene-LOC110694096	4.02	1.12	1.97	3.68	11.89	15.11	176	48	76	150	546	595	0.225	-2.15	0.000984592	0.025312	down	NW_018744239.1	1317582	1325185	-	LOC110694096	--	K23809 cytochrome P450 family 72 subfamily A polypeptide 68 | (GenBank) cytochrome P450 family 709 protein (A)	cytochrome P450 CYP72A219-like [Chenopodium quinoa]	RecName: Full=Cytochrome P450 CYP72A219; EC=1.14.-.-; AltName: Full=Cytochrome P450 CYP72A129;	SubName: Full=Uncharacterized protein {ECO:0000313|EMBL:KNA06618.1};	Cytochrome P450 CYP4/CYP19/CYP26 subfamilies	GO:0016021,integral component of membrane; GO:0020037,heme binding; GO:0005506,iron ion binding; GO:0004497,monooxygenase activity; GO:0016705,oxidoreductase activity, acting on paired donors, with incorporation or reduction of molecular oxygen	Cytochrome P450
gene-LOC110694119	4.47	4.63	0.44	0.07	0.12	0.22	138	140	12	2	4	6	22.375	4.484	1.1283e-06	9.65505e-05	up	NW_018744239.1	2071675	2075454	-	LOC110694119	--	K01381 saccharopepsin [EC:3.4.23.25] | (RefSeq) aspartic proteinase CDR1-like (A)	aspartic proteinase CDR1-like [Chenopodium quinoa]	RecName: Full=Aspartic proteinase CDR1; EC=3.4.23.-; AltName: Full=Protein CONSTITUTIVE DISEASE RESISTANCE 1; Flags: Precursor;	SubName: Full=Uncharacterized protein {ECO:0000313|EMBL:KNA06676.1};	Aspartyl protease	GO:0048046,apoplast; GO:0004190,aspartic-type endopeptidase activity; GO:0042742,defense response to bacterium; GO:0030163,protein catabolic process; GO:0010310,regulation of hydrogen peroxide metabolic process; GO:0010337,regulation of salicylic acid metabolic process	Xylanase inhibitor N-terminal
gene-LOC110694120	0.41	0.5	0.19	3.13	2.94	9.18	15	18	6	107	113	303	0.068	-3.875	6.17406e-10	1.00405e-07	down	NW_018744239.1	2078610	2080410	-	LOC110694120	--	K01381 saccharopepsin [EC:3.4.23.25] | (RefSeq) aspartic proteinase CDR1-like (A)	aspartic proteinase CDR1-like [Chenopodium quinoa]	RecName: Full=Aspartic proteinase CDR1; EC=3.4.23.-; AltName: Full=Protein CONSTITUTIVE DISEASE RESISTANCE 1; Flags: Precursor;	SubName: Full=Uncharacterized protein {ECO:0000313|EMBL:KNA06676.1};	Aspartyl protease	GO:0048046,apoplast; GO:0004190,aspartic-type endopeptidase activity; GO:0042742,defense response to bacterium; GO:0030163,protein catabolic process; GO:0010310,regulation of hydrogen peroxide metabolic process; GO:0010337,regulation of salicylic acid metabolic process	Xylanase inhibitor N-terminal
gene-LOC110694140	3.57	2.02	2.84	5.62	6.2	8.1	110	61	77	161	200	224	0.413	-1.275	0.00108037	0.0269833	down	NW_018744239.1	2588516	2592002	-	LOC110694140	--	K15014 solute carrier family 29 (equilibrative nucleoside transporter), member 1/2/3 | (RefSeq) equilibrative nucleotide transporter 1-like (A)	equilibrative nucleotide transporter 1-like [Chenopodium quinoa]	RecName: Full=Equilibrative nucleotide transporter 1; Short=AtENT1; AltName: Full=Nucleoside transporter ENT1;	SubName: Full=Uncharacterized protein {ECO:0000313|EMBL:KNA05382.1};	Nucleoside transporter	GO:0016021,integral component of membrane; GO:0005774,vacuolar membrane; GO:0005337,nucleoside transmembrane transporter activity	Nucleoside transporter
gene-LOC110694145	1.44	0.39	0.04	0	0	0	38	10	1	0	0	0	88.274	6.464	0.000801236	0.0218483	up	NW_018744239.1	2711994	2714230	+	LOC110694145	--	--	uncharacterized protein LOC110694145 [Chenopodium quinoa]	--	SubName: Full=Uncharacterized protein {ECO:0000313|EMBL:KMT11885.1};	--	--	--
gene-LOC110694185	5.9	6.9	4.6	20.47	18.27	14.48	166	190	114	536	539	366	0.317	-1.657	5.00634e-11	1.04004e-08	down	NW_018744239.1	3251245	3255959	-	LOC110694185	--	K19042 E3 ubiquitin-protein ligase BOI and related proteins [EC:2.3.2.27] | (RefSeq) LOW QUALITY PROTEIN: E3 ubiquitin-protein ligase BOI-like (A)	LOW QUALITY PROTEIN: E3 ubiquitin-protein ligase BOI-like [Chenopodium quinoa]	RecName: Full=Probable BOI-related E3 ubiquitin-protein ligase 2; EC=2.3.2.27 {ECO:0000250|UniProtKB:Q9FHE4}; AltName: Full=RING-type E3 ubiquitin transferase BRG2 {ECO:0000305};	SubName: Full=Uncharacterized protein {ECO:0000313|EMBL:KNA13187.1}; Flags: Fragment;	Predicted E3 ubiquitin ligase	GO:0046872,metal ion binding; GO:0016740,transferase activity; GO:0006952,defense response; GO:0043161,proteasome-mediated ubiquitin-dependent protein catabolic process; GO:0043067,regulation of programmed cell death	Zinc finger, C3HC4 type (RING finger)
gene-LOC110694186	0.68	0.97	0.26	5.51	5.63	3.89	15	21	5	113	130	77	0.123	-3.022	1.17906e-09	1.83444e-07	down	NW_018744239.1	3255999	3257431	-	LOC110694186	--	--	--	--	--	--	--	--
gene-LOC110694188	21.26	18.71	9.8	40.37	35.36	33.15	426	367	173	753	743	597	0.448	-1.159	0.000758892	0.0210196	down	NW_018744239.1	3330398	3332328	+	LOC110694188	--	--	--	--	--	--	--	--
gene-LOC110694254	14.44	14.38	7.18	41.34	59.12	36.16	594	579	260	1583	2550	1337	0.254	-1.979	1.22536e-07	1.30294e-05	down	NW_018744239.1	5225818	5229077	+	LOC110694254	--	K01177 beta-amylase [EC:3.2.1.2] | (RefSeq) beta-amylase 3, chloroplastic-like (A)	inactive beta-amylase 9-like [Chenopodium quinoa]	RecName: Full=Inactive beta-amylase 9; AltName: Full=1,4-alpha-D-glucan maltohydrolase; AltName: Full=Inactive beta-amylase 3;	RecName: Full=Beta-amylase {ECO:0000256|RuleBase:RU000509}; EC=3.2.1.2 {ECO:0000256|RuleBase:RU000509};	--	GO:0005737,cytoplasm; GO:0016161,beta-amylase activity; GO:0000272,polysaccharide catabolic process	Glycosyl hydrolase family 14
gene-LOC110694424	4.16	2.31	2.97	0.95	0.26	0.92	197	107	124	42	13	39	4.472	2.161	5.82519e-05	0.00288014	up	NW_018744239.1	7255442	7260510	-	LOC110694424	--	K01840 phosphomannomutase [EC:5.4.2.8] | (RefSeq) uncharacterized protein LOC107434468 (A)	uncharacterized protein LOC110694424 [Chenopodium quinoa]	--	SubName: Full=Uncharacterized protein {ECO:0000313|EMBL:KNA03284.1};	Phosphoglucomutase/phosphomannomutase	GO:0016868,intramolecular transferase activity, phosphotransferases; GO:0005975,carbohydrate metabolic process	Phosphoglucomutase/phosphomannomutase, alpha/beta/alpha domain I
gene-LOC110694507	0.42	0.8	1.03	0.14	0.15	0.1	29	54	62	9	11	6	5.447	2.445	2.22751e-05	0.00130386	up	NW_018744239.1	11905521	11911263	-	LOC110694507	--	K15047 heterogeneous nuclear ribonucleoprotein U-like protein 1 | (RefSeq) heterogeneous nuclear ribonucleoprotein U-like protein 1 (A)	uncharacterized protein LOC110694507 [Chenopodium quinoa]	--	--	--	--	--
gene-LOC110694587	0.42	0.3	0.49	1.16	2.67	1.59	67	47	69	172	447	228	0.213	-2.233	8.60046e-07	7.52069e-05	down	NW_018742345.1	5978290	5986133	+	LOC110694587	--	--	uncharacterized protein LOC110694587 [Chenopodium quinoa]	--	SubName: Full=Uncharacterized protein {ECO:0000313|EMBL:KMS95497.1};	--	--	Putative gypsy type transposon
gene-LOC110694671	1.02	0.35	0.16	10.85	0.38	26.25	36	12	5	357	14	834	0.041	-4.6	0.00150092	0.034012	down	NW_018744240.1	462569	465650	+	LOC110694671	--	K18696 glycerophosphodiester phosphodiesterase [EC:3.1.4.46] | (RefSeq) glycerophosphodiester phosphodiesterase GDPD1, chloroplastic-like (A)	glycerophosphodiester phosphodiesterase GDPD1, chloroplastic-like [Chenopodium quinoa]	RecName: Full=Glycerophosphodiester phosphodiesterase GDPD1, chloroplastic {ECO:0000305}; EC=3.1.4.46 {ECO:0000269|PubMed:21323773}; AltName: Full=Glycerophosphodiester phosphodiesterase 1 {ECO:0000303|PubMed:21323773}; Short=AtGDPD1 {ECO:0000303|PubMed:21323773}; AltName: Full=Protein SENESCENCE-RELATED GENE 3 {ECO:0000303|PubMed:8883383}; Flags: Precursor;	SubName: Full=Uncharacterized protein {ECO:0000313|EMBL:KNA07255.1}; Flags: Fragment;	Predicted starch-binding protein	GO:0009507,chloroplast; GO:0009536,plastid; GO:0008889,glycerophosphodiester phosphodiesterase activity; GO:0000287,magnesium ion binding; GO:0030643,cellular phosphate ion homeostasis; GO:0006071,glycerol metabolic process; GO:0046475,glycerophospholipid catabolic process	Glycerophosphoryl diester phosphodiesterase family
gene-LOC110694685	0	0	0.22	0.62	3.06	1.17	0	0	7	21	116	38	0.041	-4.622	0.000137122	0.00567109	down	NW_018742345.1	7294346	7307289	+	LOC110694685	--	--	uncharacterized protein LOC110694685 isoform X1 [Chenopodium quinoa]	--	SubName: Full=Uncharacterized protein {ECO:0000313|EMBL:KNA24183.1};	--	--	Serine aminopeptidase, S33
gene-LOC110694722	0.22	0	0.25	0.53	4.73	3.31	4	0	4	9	90	54	0.052	-4.273	8.68703e-05	0.00394705	down	NW_018744240.1	1116116	1117621	-	LOC110694722	--	--	--	--	--	--	--	--
gene-LOC110694782	9.95	8.04	4.6	21.07	27.59	22.9	812	643	331	1601	2362	1680	0.306	-1.707	2.66023e-06	0.000205169	down	NW_018742345.1	8407464	8416165	-	LOC110694782	--	K21989 calcium permeable stress-gated cation channel | (RefSeq) CSC1-like protein RXW8 (A)	protein SAR DEFICIENT 1-like isoform X1 [Chenopodium quinoa]	RecName: Full=Protein SAR DEFICIENT 1 {ECO:0000303|PubMed:20921422};	SubName: Full=Uncharacterized protein {ECO:0000313|EMBL:KNA20947.1};	--	GO:0005634,nucleus; GO:0003700,DNA-binding transcription factor activity; GO:0043565,sequence-specific DNA binding; GO:0071219,cellular response to molecule of bacterial origin; GO:0042742,defense response to bacterium; GO:0002229,defense response to oomycetes; GO:0009626,plant-type hypersensitive response; GO:1900426,positive regulation of defense response to bacterium; GO:0080142,regulation of …	Calmodulin binding protein-like
gene-LOC110695083	0.09	0.11	0.09	0.47	0.45	0.29	6	7	5	29	31	17	0.229	-2.128	0.000910674	0.0239778	down	NW_018744290.1	650073	669065	+	LOC110695083	--	--	B3 domain-containing protein Os01g0234100-like isoform X1 [Chenopodium quinoa]	RecName: Full=B3 domain-containing protein Os01g0234100;	SubName: Full=Uncharacterized protein {ECO:0000313|EMBL:KNA18098.1};	--	GO:0005634,nucleus; GO:0003677,DNA binding; GO:0006355,regulation of transcription, DNA-templated; GO:0006351,transcription, DNA-templated	B3 DNA binding domain
gene-LOC110695150	0.08	0.21	0.14	0.17	0.81	6.98	2	5	3	4	21	155	0.048	-4.374	0.000243753	0.00890294	down	NW_018744290.1	1245842	1247053	+	LOC110695150	--	--	uncharacterized protein LOC110695150 [Chenopodium quinoa]	--	SubName: Full=Uncharacterized protein {ECO:0000313|EMBL:KNA20593.1};	--	GO:0016021,integral component of membrane	--
gene-LOC110695163	3.15	3.34	2.12	9.03	4.87	4.86	103	107	61	275	167	143	0.454	-1.139	0.00101068	0.0256759	down	NW_018744290.1	1384688	1393362	+	LOC110695163	--	K11407 histone deacetylase 6 [EC:3.5.1.98] | (RefSeq) histone deacetylase 5 (A)	histone deacetylase 14-like [Chenopodium quinoa]	RecName: Full=Histone deacetylase 14; EC=3.5.1.98;	RecName: Full=Histone deacetylase {ECO:0000256|SAAS:SAAS00894283}; EC=3.5.1.98 {ECO:0000256|SAAS:SAAS00894283};	Histone deacetylase complex, catalytic component HDA1	GO:0009507,chloroplast; GO:0005829,cytosol; GO:0005634,nucleus; GO:0043014,alpha-tubulin binding; GO:0048487,beta-tubulin binding; GO:0032041,NAD-dependent histone deacetylase activity (H3-K14 specific); GO:0051721,protein phosphatase 2A binding; GO:0043621,protein self-association; GO:0042903,tubulin deacetylase activity; GO:0006355,regulation of transcription, DNA-templated; GO:0006351,transcri…	Histone deacetylase domain
gene-LOC110695165	0.68	1.88	1.22	0.23	0.12	0.29	42	113	66	13	8	16	5.594	2.484	5.82082e-06	0.000403862	up	NW_018744290.1	1398946	1402772	-	LOC110695165	--	--	--	--	--	--	--	--
gene-LOC110695167	2.85	4.75	6.66	2.3	0.68	1.68	68	111	140	51	17	36	2.997	1.583	0.00187111	0.0396975	up	NW_018744290.1	1403775	1408184	+	LOC110695167	--	K17427 large subunit ribosomal protein L46 | (RefSeq) 39S ribosomal protein L46, mitochondrial-like isoform X1 (A)	39S ribosomal protein L46, mitochondrial-like isoform X1 [Chenopodium quinoa]	--	SubName: Full=Uncharacterized protein {ECO:0000313|EMBL:KNA15473.1};	Mitochondrial ribosomal protein L17	--	39S mitochondrial ribosomal protein L46
gene-LOC110695173	7.97	10.36	12.13	6.01	3.9	4.2	530	675	711	372	272	251	2.098	1.069	4.37397e-06	0.00031822	up	NW_018744290.1	1461408	1466460	-	LOC110695173	--	K03798 cell division protease FtsH [EC:3.4.24.-] | (RefSeq) ATP-dependent zinc metalloprotease FTSH 6, chloroplastic-like (A)	probable inactive ATP-dependent zinc metalloprotease FTSHI 4, chloroplastic [Chenopodium quinoa]	RecName: Full=Probable inactive ATP-dependent zinc metalloprotease FTSHI 4, chloroplastic; Short=AtFTSHI4 {ECO:0000303|PubMed:12185496}; AltName: Full=Protein EMBRYO DEFECTIVE 3144 {ECO:0000303|PubMed:21139083}; AltName: Full=Protein FTSH INACTIVE PROTEASE 4 {ECO:0000303|PubMed:12185496}; Flags: Precursor;	SubName: Full=Uncharacterized protein {ECO:0000313|EMBL:KNA05337.1};	AAA+-type ATPase containing the peptidase M41 domain	GO:0009507,chloroplast; GO:0009941,chloroplast envelope; GO:0009535,chloroplast thylakoid membrane; GO:0016021,integral component of membrane; GO:0005739,mitochondrion; GO:0009536,plastid; GO:0005524,ATP binding; GO:0004176,ATP-dependent peptidase activity; GO:0004222,metalloendopeptidase activity; GO:0008237,metallopeptidase activity; GO:0009793,embryo development ending in seed dormancy; GO:000…	ATPase family associated with various cellular activities (AAA)
gene-LOC110695210	4.48	7.77	9.84	3.57	2.92	3.26	139	236	269	103	95	91	2.163	1.113	0.000771296	0.021249	up	NW_018744290.1	1880291	1884178	+	LOC110695210	--	K00083 cinnamyl-alcohol dehydrogenase [EC:1.1.1.195] | (RefSeq) probable mannitol dehydrogenase (A)	probable mannitol dehydrogenase [Chenopodium quinoa]	RecName: Full=Probable mannitol dehydrogenase; EC=1.1.1.255; AltName: Full=NAD-dependent mannitol dehydrogenase;	SubName: Full=Uncharacterized protein {ECO:0000313|EMBL:CBI37637.3};	Alcohol dehydrogenase, class V	GO:0046029,mannitol dehydrogenase activity; GO:0008270,zinc ion binding	Alcohol dehydrogenase GroES-like domain
gene-LOC110695250	0.1	0.28	0	0.18	1.75	2.38	3	8	0	5	54	63	0.079	-3.656	0.00176118	0.0381765	down	NW_018744290.1	2285299	2287791	-	LOC110695250	--	--	nicotinamidase 1-like [Chenopodium quinoa]	RecName: Full=Nicotinamidase 1 {ECO:0000305}; Short=AtNIC1 {ECO:0000303|PubMed:17335512}; EC=3.5.1.19 {ECO:0000269|PubMed:17335512}; AltName: Full=Nicotinamide deamidase 1;	SubName: Full=Uncharacterized protein {ECO:0000313|EMBL:KNA14279.1};	--	GO:0005737,cytoplasm; GO:0008936,nicotinamidase activity; GO:0006769,nicotinamide metabolic process; GO:0019365,pyridine nucleotide salvage; GO:0009737,response to abscisic acid	Isochorismatase family
gene-LOC110695269	7.79	7.83	7.4	12.25	19.74	25.18	129	127	108	189	343	375	0.382	-1.389	0.000220636	0.00825147	down	NW_018744290.1	2466693	2468384	+	LOC110695269	--	K09874 aquaporin NIP | (RefSeq) aquaporin NIP1-1-like (A)	uncharacterized protein LOC110695269 [Chenopodium quinoa]	--	SubName: Full=Uncharacterized protein {ECO:0000313|EMBL:KNA17483.1};	--	--	--
gene-LOC110695282	3.61	4.94	9.61	1.41	2.08	1.54	182	244	427	66	110	70	3.411	1.77	4.61855e-05	0.0023815	up	NW_018744290.1	2633472	2638415	-	LOC110695282	--	--	pre-rRNA-processing protein esf1-like [Chenopodium quinoa]	--	SubName: Full=Uncharacterized protein {ECO:0000313|EMBL:KNA06742.1};	Uncharacterized conserved protein	GO:0005634,nucleus	NUC153 domain
gene-LOC110695402	0.05	0.08	0.03	0.57	0.63	0.39	6	10	3	66	82	43	0.096	-3.381	4.28206e-09	6.23066e-07	down	NW_018744297.1	473501	479847	-	LOC110695402	--	K15255 ATP-dependent DNA helicase PIF1 [EC:3.6.4.12] | (RefSeq) uncharacterized protein LOC110712983 (A)	uncharacterized protein LOC110695402 [Chenopodium quinoa]	--	SubName: Full=uncharacterized protein LOC109022076 {ECO:0000313|RefSeq:XP_018860421.1};	DNA helicase PIF1/RRM3	--	PIF1-like helicase
gene-LOC110695416	6.38	8.47	4.97	14.92	18.28	18.32	163	212	112	355	490	421	0.366	-1.45	8.86095e-07	7.72967e-05	down	NW_018744297.1	1305704	1307436	-	LOC110695416	--	K09872 aquaporin PIP | (RefSeq) aquaporin PIP2-2-like (A)	aquaporin PIP2-2-like [Chenopodium quinoa]	RecName: Full=Aquaporin PIP2-7; AltName: Full=Plasma membrane intrinsic protein 2-7; AltName: Full=ZmPIP2-7; AltName: Full=ZmPIP2;7;	SubName: Full=Uncharacterized protein {ECO:0000313|EMBL:KNA10168.1};	Aquaporin (major intrinsic protein family)	GO:0016021,integral component of membrane; GO:0005886,plasma membrane; GO:0015250,water channel activity	Major intrinsic protein
gene-LOC110695430	13.41	8.79	7.05	1.79	1.46	1.53	682	438	316	85	78	70	6.051	2.597	6.34678e-13	1.83954e-10	up	NW_018744298.1	49062	54119	+	LOC110695430	--	--	--	--	--	--	--	--
gene-LOC110695435	0.07	0	0	4.13	1.52	1.85	1	0	0	53	22	23	0.011	-6.521	2.12239e-06	0.000167646	down	NW_018744298.1	474124	477657	+	LOC110695435	--	--	uncharacterized protein LOC110738007 [Chenopodium quinoa]	--	SubName: Full=Uncharacterized protein {ECO:0000313|EMBL:KNA08153.1};	--	--	--
gene-LOC110695438	0	0	0	3.17	3.38	3.55	0	0	0	111	133	120	0.001	-9.413	2.87928e-14	9.85536e-12	down	NW_018744298.1	790614	794239	+	LOC110695438	--	--	uncharacterized protein LOC110695438 isoform X1 [Chenopodium quinoa]	--	--	--	--	Afadin- and alpha -actinin-Binding
gene-LOC110695442	0	0.09	0.08	2.26	1.28	0.64	0	4	3	91	58	25	0.04	-4.656	5.42418e-08	6.16915e-06	down	NW_018744298.1	917959	922975	+	LOC110695442	--	K20891 beta-glucuronosyltransferase [EC:2.4.1.-] | (RefSeq) beta-glucuronosyltransferase GlcAT14B (A)	beta-glucuronosyltransferase GlcAT14A-like [Chenopodium quinoa]	RecName: Full=Beta-glucuronosyltransferase GlcAT14A {ECO:0000305}; EC=2.4.1.- {ECO:0000305}; AltName: Full=GT14 family glucuronic acid transferase 1 {ECO:0000305}; Short=AtGlcAT14A {ECO:0000303|PubMed:24128328};	SubName: Full=Uncharacterized protein {ECO:0000313|EMBL:KMS98363.1};	Branching enzyme	GO:0005794,Golgi apparatus; GO:0000139,Golgi membrane; GO:0016021,integral component of membrane; GO:0008375,acetylglucosaminyltransferase activity; GO:0015020,glucuronosyltransferase activity; GO:0009826,unidimensional cell growth	Core-2/I-Branching enzyme
gene-LOC110695445	0	0	0	1.74	1.61	1.73	0	0	0	26	27	25	0.007	-7.187	1.47432e-07	1.51069e-05	down	NW_018744298.1	773106	776093	-	LOC110695445	--	--	--	--	--	--	--	--
gene-LOC110695476	1.33	1.72	1.77	2.52	14.97	10.13	34	43	40	60	402	233	0.16	-2.642	2.38182e-05	0.00137183	down	NW_018744301.1	7280309	7294403	+	LOC110695476	--	K22685 DNA-dependent metalloprotease WSS1 [EC:3.4.24.-] | (RefSeq) DNA-dependent metalloprotease WSS1-like (A)	DNA-dependent metalloprotease WSS1-like [Chenopodium quinoa]	--	SubName: Full=Uncharacterized protein {ECO:0000313|EMBL:KNA23235.1};	Fe2+/Zn2+ regulated transporter	GO:0046872,metal ion binding	WLM domain
gene-LOC110695493	4.75	6.03	6.49	1.74	2.25	2.28	123	153	148	42	61	53	2.622	1.391	1.36861e-05	0.000849534	up	NW_018744301.1	732950	741186	-	LOC110695493	--	K02258 cytochrome c oxidase assembly protein subunit 11 | (RefSeq) cytochrome c oxidase assembly protein COX11, mitochondrial-like isoform X1 (A)	cytochrome c oxidase assembly protein COX11, mitochondrial-like isoform X1 [Chenopodium quinoa]	RecName: Full=Cytochrome c oxidase assembly protein COX11, mitochondrial; Flags: Precursor;	SubName: Full=Uncharacterized protein {ECO:0000313|EMBL:KNA26021.1};	Cytochrome oxidase assembly factor COX11	GO:0032592,integral component of mitochondrial membrane; GO:0005743,mitochondrial inner membrane; GO:0005739,mitochondrion; GO:0005507,copper ion binding; GO:0043621,protein self-association; GO:0009846,pollen germination; GO:1904960,positive regulation of cytochrome-c oxidase activity; GO:0010101,post-embryonic root morphogenesis	Cytochrome c oxidase assembly protein CtaG/Cox11
gene-LOC110695494	0.04	0.02	0.01	0.81	0.25	0.18	4	2	1	73	25	16	0.062	-4.004	1.69163e-05	0.00102009	down	NW_018744301.1	812043	818229	-	LOC110695494	--	--	uncharacterized protein LOC110695494 isoform X1 [Chenopodium quinoa]	--	SubName: Full=Uncharacterized protein {ECO:0000313|EMBL:KMS85024.1}; Flags: Fragment;	--	--	Plant transposase (Ptta/En/Spm family)
gene-LOC110695496	0	0	0	1.31	0.13	0.42	0	0	0	45	5	14	0.009	-6.851	3.24227e-05	0.00178449	down	NW_018744301.1	894486	898006	+	LOC110695496	--	--	--	--	--	--	--	--
gene-LOC110695507	0	0	0.03	0.31	0.2	0.26	0	0	1	11	8	9	0.037	-4.742	0.0024956	0.0481439	down	NW_018744301.1	1855124	1857108	-	LOC110695507	--	K15042 importin subunit alpha-6/7 | (RefSeq) importin subunit alpha-4-like (A)	uncharacterized protein LOC110695507 [Chenopodium quinoa]	RecName: Full=Protein FAR-RED IMPAIRED RESPONSE 1;	SubName: Full=Uncharacterized protein {ECO:0000313|EMBL:OMO51093.1};	--	GO:0005634,nucleus; GO:0003700,DNA-binding transcription factor activity; GO:0008270,zinc ion binding; GO:0010018,far-red light signaling pathway; GO:0042753,positive regulation of circadian rhythm; GO:0045893,positive regulation of transcription, DNA-templated; GO:0010017,red or far-red light signaling pathway; GO:0009585,red, far-red light phototransduction; GO:0010218,response to far red light…	MULE transposase domain
gene-LOC110695527	127.18	92.58	76.43	200.43	229.79	272.39	3538	2522	1873	5191	6704	6812	0.41	-1.288	6.43619e-05	0.00310492	down	NW_018744301.1	4034356	4035720	+	LOC110695527	--	--	zinc finger protein ZAT10-like [Chenopodium quinoa]	RecName: Full=Zinc finger protein ZAT10; AltName: Full=Salt-tolerance zinc finger;	SubName: Full=Uncharacterized protein {ECO:0000313|EMBL:KNA22734.1};	FOG: Zn-finger	GO:0005634,nucleus; GO:0003700,DNA-binding transcription factor activity; GO:0046872,metal ion binding; GO:0043565,sequence-specific DNA binding; GO:0035264,multicellular organism growth; GO:0045892,negative regulation of transcription, DNA-templated; GO:0010117,photoprotection; GO:0015979,photosynthesis; GO:0009737,response to abscisic acid; GO:0010200,response to chitin; GO:0009409,response to …	C2H2-type zinc finger
gene-LOC110695559	5.87	5.53	4.7	3.56	2.21	1.61	142	131	100	80	56	35	2.16	1.111	0.0022735	0.0451934	up	NW_018744301.1	7662666	7665139	-	LOC110695559	--	--	--	--	--	--	--	--
gene-LOC110695563	6.34	9	12.24	5.6	2.96	3.29	90	125	153	74	44	42	2.268	1.182	0.00182811	0.0390275	up	NW_018744301.1	8142176	8145813	-	LOC110695563	--	--	--	--	--	--	--	--
gene-LOC110695593	0	0	0	0.4	0.29	0.22	0	0	0	11	9	6	0.021	-5.578	0.000998247	0.0254912	down	NW_018744301.1	1289253	1292245	+	LOC110695593	--	--	uncharacterized protein LOC110695593 [Chenopodium quinoa]	--	SubName: Full=Uncharacterized protein {ECO:0000313|EMBL:KNA06196.1};	--	--	Plant transposase (Ptta/En/Spm family)
gene-LOC110695688	0.09	0.16	0.29	0.93	0.85	0.41	4	7	11	38	39	16	0.236	-2.085	0.00233321	0.0459483	down	NW_018742358.1	16686	33330	+	LOC110695688	--	K23810 (E)-8-carboxylinalool synthase [EC:1.14.14.-] | (RefSeq) geraniol 8-hydroxylase (A)	cytochrome P450 76AD1-like [Chenopodium quinoa]	RecName: Full=Geraniol 8-hydroxylase; EC=1.14.13.152; AltName: Full=Cytochrome P450 76B6; AltName: Full=Geraniol 10-hydroxylase; Short=CrG10H;	SubName: Full=Uncharacterized protein {ECO:0000313|EMBL:ALT04749.1};	Cytochrome P450 CYP2 subfamily	GO:0005789,endoplasmic reticulum membrane; GO:0016021,integral component of membrane; GO:0102811,geraniol 10-hydroxylase activity; GO:0020037,heme binding; GO:0005506,iron ion binding; GO:0016709,oxidoreductase activity, acting on paired donors, with incorporation or reduction of molecular oxygen, NAD(P)H as one donor, and incorporation of one atom of oxygen; GO:0016099,monoterpenoid biosynthetic…	Cytochrome P450
gene-LOC110695690	0.16	0.08	0.09	1.1	0.51	0.69	6	3	3	38	20	23	0.147	-2.771	0.000167885	0.00663055	down	NW_018744304.1	5229296	5234872	+	LOC110695690	--	K14664 IAA-amino acid hydrolase [EC:3.5.1.-] | (RefSeq) LOW QUALITY PROTEIN: IAA-amino acid hydrolase ILR1-like (A)	LOW QUALITY PROTEIN: IAA-amino acid hydrolase ILR1-like [Chenopodium quinoa]	RecName: Full=IAA-amino acid hydrolase ILR1 {ECO:0000303|PubMed:7792599}; EC=3.5.1.- {ECO:0000305}; Flags: Precursor;	SubName: Full=Uncharacterized protein {ECO:0000313|EMBL:KNA20228.1};	--	GO:0005783,endoplasmic reticulum; GO:0010211,IAA-Leu conjugate hydrolase activity; GO:0010210,IAA-Phe conjugate hydrolase activity; GO:0046872,metal ion binding; GO:0009850,auxin metabolic process	Peptidase family M20/M25/M40
gene-LOC110695701	0.2	0.36	0.35	1.2	0.92	1.21	8	14	12	44	38	43	0.261	-1.935	0.00010196	0.00444716	down	NW_018744304.1	5344104	5349793	-	LOC110695701	--	--	--	--	--	--	--	--
gene-LOC110695725	5.42	10.73	4.73	19.25	17.96	16.66	177	343	136	585	615	489	0.367	-1.444	5.91654e-06	0.000409712	down	NW_018744304.1	5658785	5661792	+	LOC110695725	--	--	--	--	--	--	--	--
gene-LOC110695748	6.7	1.78	3.42	0.24	0.06	0.56	211	55	95	7	2	16	13.988	3.806	1.72474e-06	0.000138674	up	NW_018744304.1	6149168	6159609	-	LOC110695748	--	K02952 small subunit ribosomal protein S13 | (RefSeq) 30S ribosomal protein S13, chloroplastic-like (A)	uncharacterized protein LOC110695748 [Chenopodium quinoa]	--	SubName: Full=Uncharacterized protein {ECO:0000313|EMBL:KNA13726.1};	--	--	alpha/beta hydrolase fold
gene-LOC110695786	0.04	0.08	0	24.81	24.26	23.64	2	4	0	1112	1225	1023	0.002	-9.182	1.01363e-47	3.03583e-44	down	NW_018742358.1	116018	119831	-	LOC110695786	--	K13229 2,4-dihydroxy-1,4-benzoxazin-3-one-glucoside dioxygenase [EC:1.14.20.2] | (RefSeq) bx6; DIBOA-glucoside dioxygenase BX6 (A)	1-aminocyclopropane-1-carboxylate oxidase homolog 4-like [Chenopodium quinoa]	RecName: Full=1-aminocyclopropane-1-carboxylate oxidase homolog 4; EC=1.14.-.-;	SubName: Full=Uncharacterized protein {ECO:0000313|EMBL:KNA25000.1};	Iron/ascorbate family oxidoreductases	GO:0009815,1-aminocyclopropane-1-carboxylate oxidase activity; GO:0046872,metal ion binding	2OG-Fe(II) oxygenase superfamily
gene-LOC110695790	0	0	0	0.46	2.48	2.19	0	0	0	15	91	69	0.003	-8.388	8.22835e-09	1.09936e-06	down	NW_018742358.1	113160	115976	-	LOC110695790	--	K13229 2,4-dihydroxy-1,4-benzoxazin-3-one-glucoside dioxygenase [EC:1.14.20.2] | (RefSeq) bx6; DIBOA-glucoside dioxygenase BX6 (A)	1-aminocyclopropane-1-carboxylate oxidase homolog 4-like [Chenopodium quinoa]	RecName: Full=1-aminocyclopropane-1-carboxylate oxidase homolog 3;	SubName: Full=Uncharacterized protein {ECO:0000313|EMBL:KNA25001.1};	Iron/ascorbate family oxidoreductases	GO:0046872,metal ion binding; GO:0016491,oxidoreductase activity	2OG-Fe(II) oxygenase superfamily
gene-LOC110695803	2.14	2.97	3.39	1.64	0.88	1.08	84	114	117	60	36	38	2.301	1.202	0.000623811	0.0181831	up	NW_018742358.1	131688	134737	+	LOC110695803	--	K15919 glyoxylate/hydroxypyruvate reductase [EC:1.1.1.79 1.1.1.81] | (RefSeq) glyoxylate/hydroxypyruvate reductase HPR3-like (A)	glyoxylate/hydroxypyruvate reductase HPR3-like [Chenopodium quinoa]	RecName: Full=Glyoxylate/hydroxypyruvate reductase HPR3; EC=1.1.1.79; EC=1.1.1.81; AltName: Full=NAD(P)H-dependent hydroxypyruvate reductase 3; Short=AtHPR3; Short=HPR 3;	SubName: Full=Uncharacterized protein {ECO:0000313|EMBL:KNA08068.1};	Glyoxylate/hydroxypyruvate reductase (D-isomer-specific 2-hydroxy acid dehydrogenase superfamily)	GO:0005829,cytosol; GO:0030267,glyoxylate reductase (NADP) activity; GO:0016618,hydroxypyruvate reductase activity; GO:0051287,NAD binding; GO:0009854,oxidative photosynthetic carbon pathway; GO:0009853,photorespiration	D-isomer specific 2-hydroxyacid dehydrogenase, NAD binding domain
gene-LOC110695879	1.67	1.09	4.19	0.03	0.06	0.06	58	37	128	1	2	2	44.571	5.478	2.44819e-09	3.71257e-07	up	NW_018744311.1	156746	159799	+	LOC110695879	--	--	--	--	--	--	--	--
gene-LOC110695881	96.79	91.37	74.88	136.55	198.31	208.13	3018	2790	2057	3964	6485	5834	0.463	-1.111	0.000213289	0.00802439	down	NW_018744311.1	167490	170395	-	LOC110695881	--	K15104 solute carrier family 25 (mitochondrial oxoglutarate transporter), member 11 | (RefSeq) mitochondrial dicarboxylate/tricarboxylate transporter DTC-like (A)	mitochondrial dicarboxylate/tricarboxylate transporter DTC-like [Chenopodium quinoa]	RecName: Full=Mitochondrial dicarboxylate/tricarboxylate transporter DTC; AltName: Full=Dicarboxylate/tricarboxylate carrier;	SubName: Full=Mitochondrial dicarboxylate transporter {ECO:0000313|EMBL:AHB08889.1};	Mitochondrial oxoglutarate/malate carrier proteins	GO:0005618,cell wall; GO:0009507,chloroplast; GO:0009941,chloroplast envelope; GO:0016021,integral component of membrane; GO:0005743,mitochondrial inner membrane; GO:0005739,mitochondrion; GO:0009506,plasmodesma; GO:0005774,vacuolar membrane; GO:0005310,dicarboxylic acid transmembrane transporter activity; GO:0015367,oxoglutarate:malate antiporter activity; GO:0015142,tricarboxylic acid transmemb…	Mitochondrial carrier protein
gene-LOC110695887	6.43	9.47	5.33	24.05	24.57	22.23	289	417	211	1007	1159	899	0.286	-1.806	9.86091e-13	2.79056e-10	down	NW_018744311.1	216409	219494	-	LOC110695887	--	K13071 pheophorbide a oxygenase [EC:1.14.15.17] | (Kazusa) Lj3g3v3032090.1; - (A)	protochlorophyllide-dependent translocon component 52, chloroplastic-like [Chenopodium quinoa]	RecName: Full=Protochlorophyllide-dependent translocon component 52, chloroplastic; AltName: Full=ACD1-like protein; AltName: Full=Protein TIC 55-IV; AltName: Full=Translocon at the inner envelope membrane of chloroplasts 55-IV; Flags: Precursor;	SubName: Full=Uncharacterized protein {ECO:0000313|EMBL:KNA22695.1};	--	GO:0009507,chloroplast; GO:0009941,chloroplast envelope; GO:0009706,chloroplast inner membrane; GO:0016021,integral component of membrane; GO:0009536,plastid; GO:0051537,2 iron, 2 sulfur cluster binding; GO:0010277,chlorophyllide a oxygenase [overall] activity; GO:0046872,metal ion binding; GO:0015031,protein transport	Pheophorbide a oxygenase
gene-LOC110695895	0.32	0.52	0.29	0	0	0	10	16	8	0	0	0	58.663	5.874	0.000261267	0.0094182	up	NW_018744311.1	264402	275625	+	LOC110695895	--	--	probable membrane metalloprotease ARASP2, chloroplastic [Chenopodium quinoa]	RecName: Full=Membrane metalloprotease ARASP, chloroplastic {ECO:0000303|PubMed:16413549}; EC=3.4.24.-; Flags: Precursor;	SubName: Full=Uncharacterized protein {ECO:0000313|EMBL:KNA22689.1};	--	GO:0009507,chloroplast; GO:0009706,chloroplast inner membrane; GO:0016021,integral component of membrane; GO:0046872,metal ion binding; GO:0004222,metalloendopeptidase activity; GO:0009658,chloroplast organization	Peptidase family M50
gene-LOC110695896	1.6	1.88	1.97	0.06	0.05	0.12	59	68	64	2	2	4	23.054	4.527	1.05147e-11	2.53624e-09	up	NW_018744311.1	290826	292634	+	LOC110695896	--	--	probable membrane metalloprotease ARASP2, chloroplastic [Chenopodium quinoa]	RecName: Full=Membrane metalloprotease ARASP, chloroplastic {ECO:0000303|PubMed:16413549}; EC=3.4.24.-; Flags: Precursor;	SubName: Full=Uncharacterized protein {ECO:0000313|EMBL:KNA22689.1};	--	GO:0009507,chloroplast; GO:0009706,chloroplast inner membrane; GO:0016021,integral component of membrane; GO:0046872,metal ion binding; GO:0004222,metalloendopeptidase activity; GO:0009658,chloroplast organization	Peptidase family M50
gene-LOC110695967	2.65	2.32	3.83	0.3	0.22	0.17	207	178	264	22	18	12	12.427	3.635	5.4419e-20	3.69023e-17	up	NW_018744311.1	728744	799920	+	LOC110695967	--	K01188 beta-glucosidase [EC:3.2.1.21] | (RefSeq) beta-glucosidase 13-like (A)	beta-glucosidase 24-like isoform X1 [Chenopodium quinoa]	RecName: Full=Beta-glucosidase 24; Short=Os6bglu24; EC=3.2.1.21; Flags: Precursor;	SubName: Full=Uncharacterized protein {ECO:0000313|EMBL:KNA25155.1};	Beta-glucosidase, lactase phlorizinhydrolase, and related proteins	GO:0008422,beta-glucosidase activity; GO:0102483,scopolin beta-glucosidase activity; GO:0005975,carbohydrate metabolic process; GO:1901657,glycosyl compound metabolic process	Glycosyl hydrolase family 1
gene-LOC110695968	1.83	1	0.63	0	0	0.04	56	30	17	0	0	1	93.933	6.554	3.39702e-06	0.000256489	up	NW_018744311.1	799967	803274	+	LOC110695968	--	K01188 beta-glucosidase [EC:3.2.1.21] | (RefSeq) beta-glucosidase 12-like (A)	beta-glucosidase 13-like isoform X1 [Chenopodium quinoa]	RecName: Full=Beta-glucosidase 13; Short=Os4bglu13; EC=3.2.1.21; Flags: Precursor;	SubName: Full=Uncharacterized protein {ECO:0000313|EMBL:KNA25154.1};	Beta-glucosidase, lactase phlorizinhydrolase, and related proteins	GO:0008422,beta-glucosidase activity; GO:0102483,scopolin beta-glucosidase activity; GO:0005975,carbohydrate metabolic process; GO:1901657,glycosyl compound metabolic process	Glycosyl hydrolase family 1
gene-LOC110695971	0.21	0.22	0.46	0	0	0	9	9	17	0	0	0	62.623	5.969	0.000233148	0.00863849	up	NW_018744311.1	808625	820835	+	LOC110695971	--	K01188 beta-glucosidase [EC:3.2.1.21] | (RefSeq) glycoside hydrolase family 1 protein (A)	beta-glucosidase 13-like isoform X1 [Chenopodium quinoa]	RecName: Full=Beta-glucosidase 24; Short=Os6bglu24; EC=3.2.1.21; Flags: Precursor;	SubName: Full=Uncharacterized protein {ECO:0000313|EMBL:KNA25154.1};	Beta-glucosidase, lactase phlorizinhydrolase, and related proteins	GO:0008422,beta-glucosidase activity; GO:0102483,scopolin beta-glucosidase activity; GO:0005975,carbohydrate metabolic process; GO:1901657,glycosyl compound metabolic process	Glycosyl hydrolase family 1
gene-LOC110696049	8.62	4.34	6.24	1.49	2.16	2.05	243	120	155	39	64	52	3.289	1.718	9.63473e-05	0.00426006	up	NW_018744311.1	1868171	1870948	-	LOC110696049	--	--	--	--	--	--	--	--
gene-LOC110696051	0.04	0	0	7.69	8.35	17.22	1	0	0	196	240	424	0.001	-9.731	2.06498e-14	7.20538e-12	down	NW_018744311.1	1863339	1866795	-	LOC110696051	--	K09753 cinnamoyl-CoA reductase [EC:1.2.1.44] | (RefSeq) cinnamoyl-CoA reductase 1-like (A)	cinnamoyl-CoA reductase 1-like [Chenopodium quinoa]	RecName: Full=Cinnamoyl-CoA reductase 1; Short=AtCCR1; EC=1.2.1.44; AltName: Full=Protein IRREGULAR XYLEM 4;	SubName: Full=Uncharacterized protein {ECO:0000313|EMBL:KNA11909.1};	Flavonol reductase/cinnamoyl-CoA reductase	GO:0005829,cytosol; GO:0016621,cinnamoyl-CoA reductase activity; GO:0050662,coenzyme binding; GO:0007623,circadian rhythm; GO:0009809,lignin biosynthetic process; GO:0009409,response to cold	NAD dependent epimerase/dehydratase family
gene-LOC110696059	28.01	27.21	20.62	46.65	57.13	59.03	1113	1059	722	1726	2381	2109	0.448	-1.16	1.68056e-05	0.00101682	down	NW_018744311.1	1953615	1957546	+	LOC110696059	--	K01177 beta-amylase [EC:3.2.1.2] | (RefSeq) beta-amylase 1, chloroplastic-like (A)	beta-amylase 1, chloroplastic-like [Chenopodium quinoa]	RecName: Full=Beta-amylase 1, chloroplastic; EC=3.2.1.2; AltName: Full=1,4-alpha-D-glucan maltohydrolase; AltName: Full=Beta-amylase 7; AltName: Full=Thioredoxin-regulated beta-amylase; Short=TR-BAMY; Flags: Precursor;	RecName: Full=Beta-amylase {ECO:0000256|RuleBase:RU000509}; EC=3.2.1.2 {ECO:0000256|RuleBase:RU000509};	--	GO:0009507,chloroplast; GO:0005829,cytosol; GO:0005634,nucleus; GO:0102229,amylopectin maltohydrolase activity; GO:0016161,beta-amylase activity; GO:0009414,response to water deprivation; GO:0005983,starch catabolic process	Glycosyl hydrolase family 14
gene-LOC110696112	1.64	1.74	0.95	4.55	6.48	6.03	57	59	29	147	236	188	0.243	-2.043	1.27601e-07	1.34882e-05	down	NW_018742359.1	3186783	3189139	-	LOC110696112	--	--	protein CHUP1, chloroplastic-like [Chenopodium quinoa]	RecName: Full=Protein CHUP1, chloroplastic; AltName: Full=Protein CHLOROPLAST UNUSUAL POSITIONING 1;	SubName: Full=Uncharacterized protein {ECO:0000313|EMBL:KNA11430.1};	--	GO:0009507,chloroplast; GO:0009707,chloroplast outer membrane; GO:0009902,chloroplast relocation	--
gene-LOC110696132	0.23	0.29	0.17	0.5	1.36	1.04	27	34	18	55	169	111	0.223	-2.163	4.23755e-05	0.00222657	down	NW_018744311.1	2934902	2950401	-	LOC110696132	--	K23113 structural maintenance of chromosomes flexible hinge domain-containing protein 1 | (RefSeq) uncharacterized protein LOC110696132 (A)	uncharacterized protein LOC110696132 [Chenopodium quinoa]	RecName: Full=Protein DEFECTIVE IN MERISTEM SILENCING 3; AltName: Full=Protein INVOLVED IN DE NOVO 1;	SubName: Full=Uncharacterized protein {ECO:0000313|EMBL:KNA22335.1};	--	GO:0000419,RNA polymerase V complex; GO:0042803,protein homodimerization activity; GO:0006306,DNA methylation; GO:0031047,gene silencing by RNA; GO:0070921,regulation of production of siRNA involved in chromatin silencing by small RNA; GO:0080188,RNA-directed DNA methylation	Histidine kinase-, DNA gyrase B-, and HSP90-like ATPase
gene-LOC110696299	3	3.9	5.13	15.15	10.44	6.89	77	98	116	362	281	159	0.361	-1.469	2.35553e-05	0.00136325	down	NW_018744348.1	579931	581576	+	LOC110696299	--	--	uncharacterized protein LOC110696299 [Chenopodium quinoa]	--	SubName: Full=Uncharacterized protein {ECO:0000313|EMBL:KNA04295.1}; Flags: Fragment;	--	--	Replication factor-A C terminal domain
gene-LOC110696300	2.14	2.02	2.87	6.81	5.71	3.07	132	122	156	391	369	170	0.442	-1.178	0.000832353	0.0223913	down	NW_018744348.1	575337	580019	+	LOC110696300	--	K07466 replication factor A1 | (RefSeq) replication protein A 70 kDa DNA-binding subunit B (A)	uncharacterized protein LOC110696300 [Chenopodium quinoa]	RecName: Full=Replication protein A 70 kDa DNA-binding subunit B; Short=OsRPA70b; AltName: Full=Replication factor A protein 1B; AltName: Full=Replication protein A 1B;	SubName: Full=Uncharacterized protein {ECO:0000313|EMBL:KNA05758.1}; Flags: Fragment;	Single-stranded DNA-binding replication protein A (RPA), large (70 kD) subunit and related ssDNA-binding proteins	GO:0005662,DNA replication factor A complex; GO:0003677,DNA binding; GO:0046872,metal ion binding; GO:0006310,DNA recombination; GO:0006281,DNA repair; GO:0006260,DNA replication	Replication protein A OB domain
gene-LOC110696343	1.34	0.95	0.88	3.22	4.93	2.99	26	18	15	58	100	52	0.276	-1.859	0.000130923	0.00545866	down	NW_018744348.1	361581	362529	-	LOC110696343	--	K14488 SAUR family protein | (RefSeq) probable cyclin-dependent serine/threonine-protein kinase DDB_G0292550 (A)	probable cyclin-dependent serine/threonine-protein kinase DDB_G0292550 [Chenopodium quinoa]	RecName: Full=Auxin-responsive protein SAUR71 {ECO:0000305}; AltName: Full=Protein SMALL AUXIN UP RNA 71 {ECO:0000303|PubMed:12036261};	SubName: Full=Uncharacterized protein {ECO:0000313|EMBL:KNA12086.1};	--	GO:0005737,cytoplasm; GO:0009734,auxin-activated signaling pathway; GO:0007275,multicellular organism development; GO:0040008,regulation of growth	Auxin responsive protein
gene-LOC110696414	3.64	16.98	6.55	0.52	0	0	75	343	119	10	0	0	53.414	5.739	0.00135511	0.0318736	up	NW_018744366.1	18986	26515	+	LOC110696414	--	--	--	--	--	--	--	--
gene-LOC110696491	1.58	3.23	1.96	11.53	3.56	4.9	33	66	36	224	78	92	0.333	-1.584	0.0010875	0.0270643	down	NW_018744367.1	1011570	1013273	+	LOC110696491	--	K07213 copper chaperone | (RefSeq) copper transport protein ATX1-like (A)	heavy metal-associated isoprenylated plant protein 24-like [Chenopodium quinoa]	RecName: Full=Heavy metal-associated isoprenylated plant protein 24 {ECO:0000303|PubMed:21072340, ECO:0000303|PubMed:23368984}; Short=AtHIP24 {ECO:0000303|PubMed:21072340, ECO:0000303|PubMed:23368984}; Flags: Precursor;	SubName: Full=Uncharacterized protein {ECO:0000313|EMBL:CBI19116.3};	Copper chaperone	GO:0005737,cytoplasm; GO:0046914,transition metal ion binding; GO:0046916,cellular transition metal ion homeostasis; GO:0030001,metal ion transport	Heavy-metal-associated domain
gene-LOC110696524	63.56	121.76	125.81	73.92	37.14	38.09	2268	4255	3955	2456	1390	1222	2.028	1.02	0.00151602	0.0342893	up	NW_018744367.1	1990451	1994001	-	LOC110696524	--	K03233 elongation factor 1-gamma | (RefSeq) elongation factor 1-gamma 2-like (A)	elongation factor 1-gamma 2-like [Chenopodium quinoa]	RecName: Full=Elongation factor 1-gamma 2; Short=EF-1-gamma 2; AltName: Full=eEF-1B gamma 2;	SubName: Full=Uncharacterized protein {ECO:0000313|EMBL:KNA06800.1};	Glutathione S-transferase	GO:0005737,cytoplasm; GO:0005634,nucleus; GO:0004364,glutathione transferase activity; GO:0003746,translation elongation factor activity; GO:0006749,glutathione metabolic process	Elongation factor 1 gamma, conserved domain
gene-LOC110696580	3.65	4.47	1.17	6.13	26	16.9	145	174	41	227	1084	604	0.176	-2.508	5.69818e-05	0.00282863	down	NW_018744367.1	4506008	4520524	+	LOC110696580	--	K16815 calcium-independent phospholipase A2-gamma | (RefSeq) Putative lysophospholipase (A)	patatin-like protein 2 isoform X1 [Chenopodium quinoa]	RecName: Full=Patatin-like protein 2; Short=AtPLP2; EC=3.1.1.-; AltName: Full=Patatin-related phospholipase A IIalpha; Short=pPLAIIa; AltName: Full=Phospholipase A IIA; Short=AtPLAIIA;	RecName: Full=Patatin {ECO:0000256|RuleBase:RU361262}; EC=3.1.1.- {ECO:0000256|RuleBase:RU361262};	Ca2+-independent phospholipase A2	GO:0005737,cytoplasm; GO:0016020,membrane; GO:0047372,acylglycerol lipase activity; GO:0016298,lipase activity; GO:0004620,phospholipase activity; GO:0071456,cellular response to hypoxia; GO:0051607,defense response to virus; GO:0016042,lipid catabolic process; GO:0006629,lipid metabolic process; GO:0031408,oxylipin biosynthetic process; GO:0009626,plant-type hypersensitive response; GO:0046686,r…	Patatin-like phospholipase
gene-LOC110696629	6.59	15.02	11.44	18.51	28.2	19.98	306	683	468	800	1373	834	0.461	-1.116	0.0010146	0.0257364	down	NW_018744367.1	8069808	8084565	-	LOC110696629	--	K19882 O-palmitoleoyl-L-serine hydrolase [EC:3.1.1.98] | (RefSeq) pectin acetylesterase 9-like (A)	pectin acetylesterase 9-like [Chenopodium quinoa]	RecName: Full=Pectin acetylesterase 9 {ECO:0000303|PubMed:25115560}; EC=3.1.1.- {ECO:0000305}; Flags: Precursor;	RecName: Full=Pectin acetylesterase {ECO:0000256|RuleBase:RU363114}; EC=3.1.1.- {ECO:0000256|RuleBase:RU363114};	Pectin acetylesterase and similar proteins	GO:0005576,extracellular region; GO:0009505,plant-type cell wall; GO:0052793,pectin acetylesterase activity; GO:0071555,cell wall organization	Pectinacetylesterase
gene-LOC110696637	6.33	2.35	2.29	18.37	21.96	7.08	204	74	65	551	742	205	0.234	-2.098	0.000249067	0.00903835	down	NW_018742372.1	366437	370979	-	LOC110696637	--	K07393 glutathionyl-hydroquinone reductase [EC:1.8.5.7] | (RefSeq) uncharacterized protein LOC110696637 isoform X1 (A)	uncharacterized protein LOC110696637 isoform X1 [Chenopodium quinoa]	--	SubName: Full=Uncharacterized protein {ECO:0000313|EMBL:KNA02975.1}; Flags: Fragment;	Predicted glutathione S-transferase	GO:0004364,glutathione transferase activity	Glutathione S-transferase, N-terminal domain
gene-LOC110696641	1.79	2.86	4.92	1.14	0.65	0.63	76	119	184	45	29	24	3.84	1.941	3.20422e-05	0.00176625	up	NW_018744367.1	8937710	8941448	+	LOC110696641	--	K11294 nucleolin | (RefSeq) nucleolin 2-like (A)	nucleolin 2-like [Chenopodium quinoa]	RecName: Full=28 kDa ribonucleoprotein, chloroplastic; Short=28RNP;	SubName: Full=Uncharacterized protein {ECO:0000313|EMBL:KNA24556.1};	FOG: RRM domain	GO:0009507,chloroplast; GO:0030529,NA; GO:0003723,RNA binding; GO:0006397,mRNA processing	RNA recognition motif. (a.k.a. RRM, RBD, or RNP domain)
gene-LOC110696655	9.04	6.74	7.1	12.11	24.12	19.96	542	396	375	676	1517	1076	0.389	-1.36	0.000297761	0.0103697	down	NW_018744367.1	9664782	9673586	+	LOC110696655	--	--	metal tolerance protein 11 isoform X1 [Chenopodium quinoa]	RecName: Full=Metal tolerance protein 11; Short=AtMTP11;	SubName: Full=Uncharacterized protein {ECO:0000313|EMBL:KNA05759.1};	Mitochondrial Fe2+ transporter MMT1 and related transporters (cation diffusion facilitator superfamily)	GO:0005794,Golgi apparatus; GO:0000139,Golgi membrane; GO:0016021,integral component of membrane; GO:0005770,late endosome; GO:0031902,late endosome membrane; GO:0005384,manganese ion transmembrane transporter activity; GO:0010486,manganese:proton antiporter activity; GO:0030026,cellular manganese ion homeostasis; GO:0046688,response to copper ion; GO:0010042,response to manganese ion	Cation efflux family
gene-LOC110696762	0.04	0.05	0.05	0.05	0.13	4.04	1	1	1	1	3	82	0.031	-5.031	0.00196817	0.0409826	down	NW_018744367.1	1392749	1394409	-	LOC110696762	--	--	non-specific lipid-transfer protein-like protein At5g64080 [Chenopodium quinoa]	RecName: Full=Non-specific lipid-transfer protein-like protein At2g13820; Flags: Precursor;	SubName: Full=Uncharacterized protein {ECO:0000313|EMBL:ESQ31489.1};	--	GO:0046658,anchored component of plasma membrane; GO:0005576,extracellular region; GO:0005886,plasma membrane; GO:0008289,lipid binding; GO:0006869,lipid transport	Probable lipid transfer
gene-LOC110696782	5.24	8.72	10.37	4.81	2.97	2.21	235	383	410	201	140	89	2.365	1.242	0.000365116	0.0121431	up	NW_018742372.1	1319139	1328389	+	LOC110696782	--	K14843 pescadillo | (RefSeq) pescadillo homolog (A)	pescadillo homolog [Chenopodium quinoa]	RecName: Full=Pescadillo homolog {ECO:0000255|HAMAP-Rule:MF_03028};	RecName: Full=Pescadillo homolog {ECO:0000256|HAMAP-Rule:MF_03028};	Protein required for normal rRNA processing	GO:0005654,nucleoplasm; GO:0070545,PeBoW complex; GO:0003723,RNA binding; GO:0000463,maturation of LSU-rRNA from tricistronic rRNA transcript (SSU-rRNA, 5.8S rRNA, LSU-rRNA); GO:2000232,regulation of rRNA processing	Pescadillo N-terminus
gene-LOC110696816	0.52	1.39	1.18	0	0	0.07	8	21	16	0	0	1	39.925	5.319	0.000377178	0.0124479	up	NW_018744369.1	1080367	1082138	-	LOC110696816	--	K13422 transcription factor MYC2 | (RefSeq) uncharacterized protein LOC112027245 (A)	uncharacterized protein LOC110696816 [Chenopodium quinoa]	--	SubName: Full=Uncharacterized protein {ECO:0000313|EMBL:KNA16226.1}; Flags: Fragment;	FOG: Transposon-encoded proteins with TYA, reverse transcriptase, integrase domains in various combinations	--	Retrotransposon gag protein
gene-LOC110696833	3.03	4.37	2.84	0	0	0.2	34	48	28	0	0	2	51.926	5.698	1.5902e-06	0.000129596	up	NW_018744369.1	1083088	1085047	-	LOC110696833	--	--	--	--	--	--	--	--
gene-LOC110696848	0.05	0.44	0.12	3.27	0.41	3.51	1	8	2	56	8	58	0.082	-3.605	0.00034314	0.0116234	down	NW_018744376.1	11810	12711	-	LOC110696848	--	--	--	--	--	--	--	--
gene-LOC110696952	0	0	0	3.53	2.41	2.14	0	0	0	113	87	66	0.002	-8.936	1.07621e-12	3.02178e-10	down	NW_018744421.1	42694	46834	-	LOC110696952	--	--	--	--	--	--	--	--
gene-LOC110696953	0	0	0	0.1	0.04	0.1	0	0	0	10	4	10	0.022	-5.498	0.00198201	0.0411317	down	NW_018744421.1	82372	93141	-	LOC110696953	--	--	--	--	--	--	--	--
gene-LOC110696977	0.62	0.73	0.55	0.62	4.74	13.04	27	31	21	25	215	507	0.095	-3.391	4.81558e-05	0.0024619	down	NW_018744441.1	35819	39773	-	LOC110696977	--	K06118 UDP-sulfoquinovose synthase [EC:3.13.1.1] | (RefSeq) UDP-sulfoquinovose synthase, chloroplastic (A)	UDP-sulfoquinovose synthase, chloroplastic [Chenopodium quinoa]	RecName: Full=UDP-sulfoquinovose synthase, chloroplastic; EC=3.13.1.1; AltName: Full=SoSQD1; AltName: Full=Sulfite:UDP-glucose sulfotransferase; AltName: Full=Sulfolipid biosynthesis protein; Flags: Precursor;	SubName: Full=Uncharacterized protein {ECO:0000313|EMBL:KNA24375.1};	UDP-glucose 4-epimerase/UDP-sulfoquinovose synthase	GO:0009570,chloroplast stroma; GO:0050662,coenzyme binding; GO:0019899,enzyme binding; GO:0101016,FMN-binding domain binding; GO:0046507,UDPsulfoquinovose synthase activity	NAD dependent epimerase/dehydratase family
gene-LOC110696985	3.49	0.04	6.89	0.02	0	0	185	2	322	1	0	0	489.615	8.936	7.86259e-05	0.00365092	up	NW_018744445.1	170478	177641	+	LOC110696985	--	--	putative leucine-rich repeat-containing protein DDB_G0290503 isoform X2 [Chenopodium quinoa]	--	SubName: Full=Uncharacterized protein {ECO:0000313|EMBL:KNA04462.1};	--	--	--
gene-LOC110697030	2.33	4.92	3.17	18.89	10.03	5.7	60	124	72	453	271	132	0.294	-1.767	6.47584e-05	0.00311569	down	NW_018744460.1	47487	49732	-	LOC110697030	--	K19329 WW domain-containing oxidoreductase | (RefSeq) short-chain dehydrogenase TIC 32, chloroplastic-like (A)	short-chain dehydrogenase TIC 32, chloroplastic-like [Chenopodium quinoa]	RecName: Full=Short-chain dehydrogenase TIC 32, chloroplastic; EC=1.1.1.-; AltName: Full=Translocon at the inner envelope membrane of chloroplasts 32; Short=PsTIC32;	SubName: Full=Uncharacterized protein {ECO:0000313|EMBL:ONI25357.1};	Dehydrogenases with different specificities (related to short-chain alcohol dehydrogenases)	GO:0009706,chloroplast inner membrane; GO:0005516,calmodulin binding; GO:0016491,oxidoreductase activity; GO:0015031,protein transport	short chain dehydrogenase
gene-LOC110697058	1.13	1.26	0.57	1.51	2.8	4.62	54	59	24	67	140	198	0.313	-1.674	0.0024121	0.0470805	down	NW_018744460.1	416798	423749	-	LOC110697058	--	K13667 protein glucosyltransferase [EC:2.4.1.-] | (RefSeq) O-glucosyltransferase rumi (A)	O-glucosyltransferase rumi homolog [Chenopodium quinoa]	--	SubName: Full=Uncharacterized protein {ECO:0000313|EMBL:KNA06529.1};	Endoplasmic reticulum protein EP58, contains filamin rod domain and KDEL motif	GO:0016021,integral component of membrane	Glycosyl transferase family 90
gene-LOC110697330	4.76	1.92	1.31	4.97	25.44	24.17	329	130	80	320	1843	1501	0.141	-2.822	3.82273e-05	0.00205364	down	NW_018744460.1	134407	146470	-	LOC110697330	--	K13466 EIX receptor 1/2 | (RefSeq) LRR receptor-like serine/threonine-protein kinase GSO2 (A)	receptor-like protein 12 [Chenopodium quinoa]	RecName: Full=Receptor-like protein EIX2 {ECO:0000305}; AltName: Full=EIX receptor 2 {ECO:0000312|EMBL:AAR28378.1}; Flags: Precursor;	SubName: Full=Uncharacterized protein {ECO:0000313|EMBL:KNA11576.1};	FOG: Leucine rich repeat	GO:0016021,integral component of membrane; GO:0005886,plasma membrane; GO:0050832,defense response to fungus	Leucine rich repeat
gene-LOC110697411	0.04	0	0.05	0.19	0.92	0.98	1	0	1	4	22	20	0.042	-4.58	0.00150566	0.0340979	down	NW_018744460.1	1113513	1114631	-	LOC110697411	--	K09286 EREBP-like factor | (RefSeq) dehydration-responsive element-binding protein 1A-like (A)	dehydration-responsive element-binding protein 1A-like [Chenopodium quinoa]	RecName: Full=Dehydration-responsive element-binding protein 1A {ECO:0000303|PubMed:9707537}; Short=Protein DREB1A {ECO:0000303|PubMed:9707537}; AltName: Full=C-repeat/dehydration-responsive element-binding factor 3 {ECO:0000303|PubMed:9881163}; Short=C-repeat-binding factor 3 {ECO:0000303|PubMed:9881163}; Short=CRT/DRE-binding factor 3 {ECO:0000303|PubMed:9881163}; AltName: Full=Cold resistance-…	SubName: Full=Uncharacterized protein {ECO:0000313|EMBL:KNA09465.1};	--	GO:0005634,nucleus; GO:0003677,DNA binding; GO:0003700,DNA-binding transcription factor activity; GO:0009631,cold acclimation; GO:0009409,response to cold; GO:0009414,response to water deprivation; GO:0006351,transcription, DNA-templated	AP2 domain
gene-LOC110697495	4.26	8.09	8.36	0.62	0.58	0.41	245	455	423	33	35	21	12.267	3.617	3.99823e-25	4.78988e-22	up	NW_018744466.1	77844	80884	+	LOC110697495	--	--	--	--	--	--	--	--
gene-LOC110697499	5.7	5.92	7.9	4.79	2.44	2.41	216	220	264	169	97	82	2.003	1.002	0.00232305	0.0457984	up	NW_018744466.1	551104	557173	-	LOC110697499	--	K00134 glyceraldehyde 3-phosphate dehydrogenase [EC:1.2.1.12] | (RefSeq) glyceraldehyde-3-phosphate dehydrogenase GAPCP2, chloroplastic-like (A)	glyceraldehyde-3-phosphate dehydrogenase GAPCP2, chloroplastic-like [Chenopodium quinoa]	RecName: Full=Glyceraldehyde-3-phosphate dehydrogenase GAPCP2, chloroplastic; EC=1.2.1.12; AltName: Full=Glyceraldehyde-3-phosphate dehydrogenase of plastid 2; AltName: Full=NAD-dependent glyceraldehydephosphate dehydrogenase chloroplastic 2; Flags: Precursor;	RecName: Full=Glyceraldehyde-3-phosphate dehydrogenase {ECO:0000256|RuleBase:RU361160}; EC=1.2.1.- {ECO:0000256|RuleBase:RU361160};	Glyceraldehyde 3-phosphate dehydrogenase	GO:0009570,chloroplast stroma; GO:0009536,plastid; GO:0004365,glyceraldehyde-3-phosphate dehydrogenase (NAD+) (phosphorylating) activity; GO:0051287,NAD binding; GO:0050661,NADP binding; GO:0080144,amino acid homeostasis; GO:0005975,carbohydrate metabolic process; GO:0006006,glucose metabolic process; GO:0006096,glycolytic process; GO:0080022,primary root development	Glyceraldehyde 3-phosphate dehydrogenase, C-terminal domain
gene-LOC110697502	8.67	14.34	15.41	6.94	2.07	1.14	263	426	412	196	66	31	3.809	1.929	0.000536369	0.0163782	up	NW_018744466.1	870529	874240	+	LOC110697502	--	K01535 H+-transporting ATPase [EC:7.1.2.1] | (RefSeq) plasma membrane ATPase 4-like (A)	plasma membrane ATPase 4-like [Chenopodium quinoa]	RecName: Full=ATPase 6, plasma membrane-type; EC=3.6.3.6; AltName: Full=Proton pump 6;	RecName: Full=Plasma membrane ATPase {ECO:0000256|RuleBase:RU362083}; EC=3.6.3.6 {ECO:0000256|RuleBase:RU362083};	Plasma membrane H+-transporting ATPase	GO:0016021,integral component of membrane; GO:0016020,membrane; GO:0005886,plasma membrane; GO:0005524,ATP binding; GO:0008553,proton-exporting ATPase activity, phosphorylative mechanism; GO:0046872,metal ion binding; GO:0006754,ATP biosynthetic process	Cation transporter/ATPase, N-terminus
gene-LOC110697507	1.49	2.38	1.89	0	0	0	42	66	47	0	0	0	269.516	8.074	3.91828e-10	6.83607e-08	up	NW_018744466.1	1521447	1523464	-	LOC110697507	--	--	--	--	--	--	--	--
gene-LOC110697510	4.42	8.69	11.16	4.54	2.07	1.41	251	483	558	240	123	72	2.972	1.572	0.000566302	0.0169751	up	NW_018744466.1	1603897	1613709	-	LOC110697510	--	K14857 AdoMet-dependent rRNA methyltransferase SPB1 [EC:2.1.1.-] | (RefSeq) adoMet-dependent rRNA methyltransferase spb1-like (A)	adoMet-dependent rRNA methyltransferase spb1-like [Chenopodium quinoa]	--	RecName: Full=Putative rRNA methyltransferase {ECO:0000256|HAMAP-Rule:MF_03163}; EC=2.1.1.- {ECO:0000256|HAMAP-Rule:MF_03163}; AltName: Full=2'-O-ribose RNA methyltransferase SPB1 homolog {ECO:0000256|HAMAP-Rule:MF_03163};	Putative SAM-dependent rRNA methyltransferase SPB1	GO:0005730,nucleolus; GO:0008649,rRNA methyltransferase activity; GO:0000453,enzyme-directed rRNA 2'-O-methylation	Spb1 C-terminal domain
gene-LOC110697552	2.06	1.77	1.56	3.54	3.83	3.31	99	83	66	158	193	143	0.49	-1.031	0.000635143	0.0183041	down	NW_018744469.1	219335	234074	+	LOC110697552	--	K14297 nuclear pore complex protein Nup98-Nup96 | (RefSeq) zinc finger, C3HC4 type (RING finger) protein (A)	probable E3 ubiquitin-protein ligase ZFP1 [Chenopodium quinoa]	RecName: Full=Probable E3 ubiquitin-protein ligase HIP1; EC=2.3.2.27; AltName: Full=HAL3-interacting protein 1; Short=OsHIP1; AltName: Full=RING-H2 finger HIP1; AltName: Full=RING-type E3 ubiquitin transferase HIP1 {ECO:0000305};	SubName: Full=Uncharacterized protein {ECO:0000313|EMBL:KNA15709.1};	FOG: Predicted E3 ubiquitin ligase	GO:0046872,metal ion binding; GO:0061630,ubiquitin protein ligase activity; GO:0043161,proteasome-mediated ubiquitin-dependent protein catabolic process; GO:0040008,regulation of growth	Ring finger domain
gene-LOC110697636	6.59	4.87	4.05	20.83	15.9	67.76	109	79	59	321	276	1008	0.143	-2.809	1.20779e-06	0.00010262	down	NW_018744472.1	59631	60611	-	LOC110697636	--	--	--	--	--	--	--	--
gene-LOC110697656	1.14	1.59	1.03	0.06	0.17	0.2	39	53	31	2	6	6	8.323	3.057	3.4923e-06	0.000261486	up	NW_018744491.1	61268	62942	+	LOC110697656	--	--	--	--	--	--	--	--
gene-LOC110697661	0.09	0.02	0	0.11	0.89	0.43	5	1	0	6	53	22	0.073	-3.784	0.00223201	0.0446021	down	NW_018744491.1	71153	81454	-	LOC110697661	--	--	--	--	--	--	--	--
gene-LOC110697673	54.66	42.89	31.3	99.89	82.05	120.8	1447	1112	730	2462	2278	2875	0.416	-1.265	7.48882e-05	0.00349998	down	NW_018744497.1	137663	140399	-	LOC110697673	--	K09872 aquaporin PIP | (RefSeq) probable aquaporin PIP2-5 (A)	probable aquaporin PIP2-5 [Chenopodium quinoa]	RecName: Full=Probable aquaporin PIP2-5; AltName: Full=Plasma membrane intrinsic protein 2-5; Short=AtPIP2;5; AltName: Full=Plasma membrane intrinsic protein 2d; Short=PIP2d;	SubName: Full=Uncharacterized protein {ECO:0000313|EMBL:KNA13853.1};	Aquaporin (major intrinsic protein family)	GO:0005887,integral component of plasma membrane; GO:0015250,water channel activity; GO:0034220,ion transmembrane transport; GO:0006833,water transport	Major intrinsic protein
gene-LOC110697674	20.99	49.33	76.47	26.24	8.02	11.22	414	953	1329	482	166	199	3.173	1.666	0.000995216	0.0254788	up	NW_018744497.1	255214	256181	-	LOC110697674	--	K02870 large subunit ribosomal protein L12e | (RefSeq) 60S ribosomal protein L12-1 (A)	60S ribosomal protein L12-1 [Chenopodium quinoa]	RecName: Full=60S ribosomal protein L12-1;	SubName: Full=Uncharacterized protein {ECO:0000313|EMBL:KNA25907.1};	40S ribosomal protein S2	GO:0009507,chloroplast; GO:0005829,cytosol; GO:0022625,cytosolic large ribosomal subunit; GO:0022626,cytosolic ribosome; GO:0005730,nucleolus; GO:0005634,nucleus; GO:0009506,plasmodesma; GO:0005773,vacuole; GO:0019843,rRNA binding; GO:0003735,structural constituent of ribosome; GO:0008270,zinc ion binding; GO:0009409,response to cold; GO:0000027,ribosomal large subunit assembly; GO:0006412,transl…	Ribosomal protein L11, N-terminal domain
gene-LOC110697697	168.22	237.53	342.47	178.32	69.84	54.58	4426	6120	7938	4368	1927	1291	2.462	1.3	0.00216113	0.0434888	up	NW_018744497.1	1274574	1278135	+	LOC110697697	--	K11294 nucleolin | (RefSeq) 29 kDa ribonucleoprotein A, chloroplastic-like (A)	29 kDa ribonucleoprotein A, chloroplastic-like [Chenopodium quinoa]	RecName: Full=RNA-binding protein CP29B, chloroplastic {ECO:0000305}; AltName: Full=Ribonucleoprotein At2g37220; Flags: Precursor;	SubName: Full=Uncharacterized protein {ECO:0000313|EMBL:KNA09687.1};	FOG: RRM domain	GO:0009507,chloroplast; GO:0009941,chloroplast envelope; GO:0009570,chloroplast stroma; GO:0009534,chloroplast thylakoid; GO:0009535,chloroplast thylakoid membrane; GO:0030529,NA; GO:0010319,stromule; GO:0009579,thylakoid; GO:0003729,mRNA binding; GO:0008266,poly(U) RNA binding; GO:0045087,innate immune response; GO:0006397,mRNA processing; GO:0009737,response to abscisic acid; GO:0009409,respons…	RNA recognition motif. (a.k.a. RRM, RBD, or RNP domain)
gene-LOC110697832	11.65	18.97	33.65	13.08	4.34	5.65	220	351	560	230	86	96	2.754	1.462	0.00244319	0.0474127	up	NW_018744501.1	1512756	1513682	+	LOC110697832	--	--	rRNA-processing protein CGR1-like [Chenopodium quinoa]	--	SubName: Full=Uncharacterized protein {ECO:0000313|EMBL:KNA18504.1};	--	--	Cgr1 family
gene-LOC110698009	0.34	0.52	0.45	0.12	0.05	0.03	24	36	28	8	4	2	6.178	2.627	0.000160074	0.00639942	up	NW_018744502.1	4018292	4026876	+	LOC110698009	--	--	uncharacterized protein LOC110698009 [Chenopodium quinoa]	--	SubName: Full=Uncharacterized protein {ECO:0000313|EMBL:KNA05185.1}; Flags: Fragment;	--	--	--
gene-LOC110698024	0.83	2.25	0.86	6.54	2.4	4.29	34	90	31	249	103	158	0.287	-1.802	0.00023478	0.00867228	down	NW_018744502.1	4901295	4904836	+	LOC110698024	--	K09338 homeobox-leucine zipper protein | (RefSeq) homeobox-leucine zipper protein HAT5-like (A)	homeobox-leucine zipper protein ATHB-54-like [Chenopodium quinoa]	RecName: Full=Homeobox-leucine zipper protein HAT5; AltName: Full=HD-ZIP protein ATHB-1; AltName: Full=Homeodomain transcription factor ATHB-1; AltName: Full=Homeodomain-leucine zipper protein HAT5; Short=HD-ZIP protein 5;	SubName: Full=homeobox-leucine zipper protein HAT5-like {ECO:0000313|RefSeq:XP_016442143.1};	Transcription factor HEX, contains HOX and HALZ domains	GO:0005634,nucleus; GO:0003700,DNA-binding transcription factor activity; GO:0042803,protein homodimerization activity; GO:0043565,sequence-specific DNA binding; GO:0009965,leaf morphogenesis; GO:0045893,positive regulation of transcription, DNA-templated; GO:0009637,response to blue light; GO:0009651,response to salt stress; GO:0006351,transcription, DNA-templated	Homeodomain
gene-LOC110698119	1.91	3.07	1.62	3.83	5.96	3.59	125	196	93	233	408	211	0.465	-1.106	0.00257103	0.0490391	down	NW_018744502.1	7297960	7321733	-	LOC110698119	--	--	--	--	--	--	--	--
gene-LOC110698132	29.05	18.69	12.17	53.93	44.06	70.75	1271	801	469	2197	2022	2783	0.35	-1.516	0.00015633	0.00626367	down	NW_018744502.1	7613664	7619981	-	LOC110698132	--	K00827 alanine-glyoxylate transaminase / (R)-3-amino-2-methylpropionate-pyruvate transaminase [EC:2.6.1.44 2.6.1.40] | (RefSeq) alanine--glyoxylate aminotransferase 2 homolog 3, mitochondrial-like (A)	alanine--glyoxylate aminotransferase 2 homolog 3, mitochondrial-like [Chenopodium quinoa]	RecName: Full=Alanine--glyoxylate aminotransferase 2 homolog 3, mitochondrial; EC=2.6.1.44; AltName: Full=Beta-alanine-pyruvate aminotransferase 3; Flags: Precursor;	SubName: Full=Uncharacterized protein {ECO:0000313|EMBL:KNA04894.1};	Alanine-glyoxylate aminotransferase AGT2	GO:0005739,mitochondrion; GO:0008453,alanine-glyoxylate transaminase activity; GO:0042802,identical protein binding; GO:0030170,pyridoxal phosphate binding; GO:0043562,cellular response to nitrogen levels; GO:0009853,photorespiration	Aminotransferase class-III
gene-LOC110698286	12.01	18.73	27.01	10.7	6.41	6.36	582	889	1153	483	326	277	2.388	1.256	0.000135149	0.0055959	up	NW_018744504.1	196755	200075	-	LOC110698286	--	K06943 nucleolar GTP-binding protein | (RefSeq) nucleolar GTP-binding protein 1-like (A)	nucleolar GTP-binding protein 1-like [Chenopodium quinoa]	RecName: Full=Nucleolar GTP-binding protein 1;	RecName: Full=Nucleolar GTP-binding protein 1 {ECO:0000256|PIRNR:PIRNR038919};	GTP-binding protein CRFG/NOG1 (ODN superfamily)	GO:0016020,membrane; GO:0005730,nucleolus; GO:0005525,GTP binding; GO:0042254,ribosome biogenesis	NOG1 N-terminal helical domain
gene-LOC110698419	0.4	0.22	0.35	0	0	0	13	7	10	0	0	0	53.823	5.75	0.000549291	0.0166454	up	NW_018744535.1	35203	37994	+	LOC110698419	--	K17609 nucleoredoxin [EC:1.8.1.8] | (RefSeq) probable nucleoredoxin 3 (A)	probable nucleoredoxin 3 [Chenopodium quinoa]	RecName: Full=Probable nucleoredoxin 3; Short=AtNrx3; EC=1.8.1.8;	SubName: Full=Uncharacterized protein {ECO:0000313|EMBL:KNA16880.1};	Thioredoxin, nucleoredoxin and related proteins	GO:0005737,cytoplasm; GO:0047134,protein-disulfide reductase activity; GO:0004791,thioredoxin-disulfide reductase activity; GO:0045454,cell redox homeostasis	Thioredoxin-like
gene-LOC110698440	9.11	9.09	5.89	15.66	19.74	18.23	302	295	172	483	686	543	0.432	-1.211	6.40583e-05	0.00309443	down	NW_018744537.1	251966	253669	-	LOC110698440	--	--	--	--	--	--	--	--
gene-LOC110698459	99.54	89.02	157.84	30.73	33.2	47.47	1698	1487	2372	488	594	728	2.98	1.575	3.79147e-06	0.000280382	up	NW_018744537.1	431172	432262	-	LOC110698459	--	K13195 cold-inducible RNA-binding protein | (RefSeq) glycine-rich RNA-binding, abscisic acid-inducible protein-like (A)	glycine-rich RNA-binding, abscisic acid-inducible protein-like [Chenopodium quinoa]	RecName: Full=Glycine-rich RNA-binding protein;	SubName: Full=Uncharacterized protein {ECO:0000313|EMBL:KZN11015.1};	FOG: RRM domain	GO:0003723,RNA binding	RNA recognition motif. (a.k.a. RRM, RBD, or RNP domain)
gene-LOC110698461	40.71	55.92	141.52	38.3	11.13	16.21	701	943	2147	614	201	251	3.614	1.854	0.000507705	0.0157166	up	NW_018744537.1	453008	454126	-	LOC110698461	--	K13195 cold-inducible RNA-binding protein | (RefSeq) glycine-rich RNA-binding protein-like (A)	glycine-rich RNA-binding protein-like [Chenopodium quinoa]	RecName: Full=Glycine-rich RNA-binding protein GRP1A;	SubName: Full=Uncharacterized protein {ECO:0000313|EMBL:KNA17122.1};	FOG: RRM domain	GO:0005634,nucleus; GO:0003723,RNA binding	RNA recognition motif. (a.k.a. RRM, RBD, or RNP domain)
gene-LOC110698536	4.85	1.79	0.92	5.65	9.6	13.04	366	132	61	397	760	885	0.264	-1.921	0.00226527	0.0450879	down	NW_018744537.1	1230861	1238000	+	LOC110698536	--	K19729 guanine nucleotide-binding protein G(t) subunit alpha 3 | (RefSeq) guanine nucleotide-binding protein alpha-1 subunit isoform X1 (A)	extra-large guanine nucleotide-binding protein 1-like [Chenopodium quinoa]	RecName: Full=Extra-large guanine nucleotide-binding protein 1; AltName: Full=Extra-large GTP-binding protein 1; Short=Extra-large G-protein 1;	SubName: Full=Uncharacterized protein {ECO:0000313|EMBL:KNA14590.1};	G-protein alpha subunit (small G protein superfamily)	GO:0005834,heterotrimeric G-protein complex; GO:0005634,nucleus; GO:0031683,G-protein beta/gamma-subunit complex binding; GO:0001664,G protein-coupled receptor binding; GO:0005525,GTP binding; GO:0003924,GTPase activity; GO:0046872,metal ion binding; GO:0004871,NA; GO:0007188,adenylate cyclase-modulating G protein-coupled receptor signaling pathway	G-protein alpha subunit
gene-LOC110698548	8.55	9.38	5.65	19.02	9.78	17.41	366	393	213	758	439	670	0.5	-1.001	0.00226229	0.0450702	down	NW_018744537.1	1344745	1346844	-	LOC110698548	--	K20893 probable galacturonosyltransferase-like 1 [EC:2.4.1.-] | (RefSeq) probable galacturonosyltransferase-like 1 (A)	probable galacturonosyltransferase-like 1 [Chenopodium quinoa]	RecName: Full=Probable galacturonosyltransferase-like 1; EC=2.4.1.-; AltName: Full=Protein GAOLAOZHUANGREN 1; AltName: Full=Protein PARVUS;	RecName: Full=Hexosyltransferase {ECO:0000256|RuleBase:RU362027}; EC=2.4.1.- {ECO:0000256|RuleBase:RU362027};	--	GO:0005783,endoplasmic reticulum; GO:0005789,endoplasmic reticulum membrane; GO:0005794,Golgi apparatus; GO:0016021,integral component of membrane; GO:0047262,polygalacturonate 4-alpha-galacturonosyltransferase activity; GO:0016757,transferase activity, transferring glycosyl groups; GO:0052386,cell wall thickening; GO:0010417,glucuronoxylan biosynthetic process; GO:0048366,leaf development; GO:00…	Glycosyl transferase family 8
gene-LOC110698554	5.5	2.48	6.01	1.33	0.99	0.44	111	49	107	25	21	8	5.067	2.341	5.14349e-05	0.00259631	up	NW_018744537.1	1412213	1413592	+	LOC110698554	--	--	CCG-binding protein 1-like [Chenopodium quinoa]	RecName: Full=CCG-binding protein 1; Short=AtCBP1 {ECO:0000303|PubMed:26462908}; AltName: Full=Protein MATERNAL EFFECT EMBRYO ARREST 14 {ECO:0000305};	SubName: Full=Uncharacterized protein {ECO:0000313|EMBL:KNA18602.1};	--	GO:0009507,chloroplast; GO:0005829,cytosol; GO:0005634,nucleus; GO:0036033,mediator complex binding; GO:0050832,defense response to fungus; GO:0009793,embryo development ending in seed dormancy; GO:0010183,pollen tube guidance	--
gene-LOC110698563	2.18	2.07	1.38	3.65	4.05	7.46	72	67	40	112	140	221	0.356	-1.488	0.000784169	0.0215302	down	NW_018744537.1	1476027	1478975	+	LOC110698563	--	K24028 salicylic acid 3-hydroxylase [EC:1.14.11.-] | (RefSeq) protein DMR6-LIKE OXYGENASE 2-like (A)	probable 2-oxoglutarate-dependent dioxygenase At5g05600 [Chenopodium quinoa]	RecName: Full=Probable 2-oxoglutarate-dependent dioxygenase At5g05600 {ECO:0000305}; EC=1.14.11.- {ECO:0000305};	SubName: Full=Uncharacterized protein {ECO:0000313|EMBL:KNA08492.1};	Iron/ascorbate family oxidoreductases	GO:0005829,cytosol; GO:0051213,dioxygenase activity; GO:0120091,jasmonic acid hydrolase; GO:0046872,metal ion binding; GO:0097237,cellular response to toxic substance; GO:0009813,flavonoid biosynthetic process; GO:2000022,regulation of jasmonic acid mediated signaling pathway; GO:0080167,response to karrikin	non-haem dioxygenase in morphine synthesis N-terminal
gene-LOC110698571	5.71	5.69	5.26	2.27	1.96	2.24	286	279	232	106	103	101	2.496	1.319	3.69964e-08	4.40282e-06	up	NW_018744537.1	1540539	1543886	+	LOC110698571	--	K14491 two-component response regulator ARR-B family | (RefSeq) two-component response regulator ORR24-like (A)	transcription factor HHO6-like [Chenopodium quinoa]	RecName: Full=Myb family transcription factor EFM {ECO:0000303|PubMed:25132385}; AltName: Full=MYB-domain transcription factor HHO4 {ECO:0000305}; AltName: Full=Protein EARLY FLOWERING MYB {ECO:0000303|PubMed:25132385}; AltName: Full=Protein HRS1 HOMOLOG 4 {ECO:0000305};	SubName: Full=Uncharacterized protein {ECO:0000313|EMBL:KNA22891.1};	--	GO:0005634,nucleus; GO:0003677,DNA binding; GO:0003700,DNA-binding transcription factor activity; GO:0009908,flower development; GO:0009740,gibberellic acid mediated signaling pathway; GO:0010452,histone H3-K36 methylation; GO:0048579,negative regulation of long-day photoperiodism, flowering; GO:1903507,negative regulation of nucleic acid-templated transcription; GO:0006355,regulation of transcri…	Myb-like DNA-binding domain
gene-LOC110698697	0.55	0.79	0.98	28.65	7.78	1.17	12	17	19	585	179	23	0.063	-3.982	2.00605e-06	0.000159507	down	NW_018744537.1	3328260	3332260	+	LOC110698697	--	K02265 cytochrome c oxidase subunit 5b | (RefSeq) cytochrome c oxidase subunit 5b-1, mitochondrial-like (A)	cytochrome c oxidase subunit 5b-1, mitochondrial-like [Chenopodium quinoa]	RecName: Full=Cytochrome c oxidase subunit 5b-2, mitochondrial; Short=AtCOX5b-2; Flags: Precursor;	SubName: Full=cytochrome c oxidase subunit 5b-1, mitochondrial-like {ECO:0000313|RefSeq:XP_018827819.1};	Cytochrome c oxidase, subunit Vb/COX4	GO:0005751,mitochondrial respiratory chain complex IV; GO:0005739,mitochondrion; GO:0004129,cytochrome-c oxidase activity; GO:0046872,metal ion binding; GO:0042776,mitochondrial ATP synthesis coupled proton transport; GO:0006123,mitochondrial electron transport, cytochrome c to oxygen	Cytochrome c oxidase subunit Vb
gene-LOC110698715	26.35	32.81	43.04	20.98	12.54	11.67	912	1112	1312	676	455	363	2.213	1.146	3.28855e-05	0.00179894	up	NW_018744537.1	3676912	3679244	+	LOC110698715	--	K03063 26S proteasome regulatory subunit T3 | (RefSeq) 26S protease regulatory subunit 6B homolog (A)	root phototropism protein 3-like [Chenopodium quinoa]	RecName: Full=Coleoptile phototropism protein 1; AltName: Full=BTB/POZ domain-containing protein CPT1; AltName: Full=Non-phototropic hypocotyl 3-like protein; Short=NPH3-like protein;	SubName: Full=Uncharacterized protein {ECO:0000313|EMBL:KNA11059.1};	--	GO:0005886,plasma membrane; GO:0009638,phototropism; GO:0016567,protein ubiquitination	NPH3 family
gene-LOC110698721	0.36	0.23	0.25	1.26	0.64	1.32	37	23	23	121	69	122	0.259	-1.949	1.97132e-05	0.001173	down	NW_018744537.1	3730141	3737934	+	LOC110698721	--	K08712 ATP-binding cassette, subfamily G (WHITE), member 2, SNQ2 | (RefSeq) ABC transporter, ATP-binding protein (A)	pleiotropic drug resistance protein 1-like [Chenopodium quinoa]	RecName: Full=Pleiotropic drug resistance protein 1; AltName: Full=NtPDR1;	SubName: Full=Uncharacterized protein {ECO:0000313|EMBL:KNA08458.1};	Pleiotropic drug resistance proteins (PDR1-15), ABC superfamily	GO:0016021,integral component of membrane; GO:0005524,ATP binding; GO:0016887,ATPase activity	ABC-2 type transporter
gene-LOC110698741	0.46	0.72	0.38	2.65	1.81	1.13	21	32	15	112	86	46	0.272	-1.877	5.20816e-05	0.00262526	down	NW_018744537.1	4072925	4075751	-	LOC110698741	--	--	uncharacterized protein LOC110698741 [Chenopodium quinoa]	--	--	--	--	--
gene-LOC110698758	0	0.04	0	0.97	0.49	0.74	0	1	0	23	13	17	0.02	-5.66	7.6781e-05	0.00357913	down	NW_018742384.1	7493	12256	-	LOC110698758	--	--	--	--	--	--	--	--
gene-LOC110698797	2.97	2.11	1.04	8.24	6.7	14.13	88	61	27	227	208	376	0.206	-2.282	5.39518e-06	0.000378716	down	NW_018744537.1	5043281	5050291	+	LOC110698797	--	K14709 solute carrier family 39 (zinc transporter), member 1/2/3 | (RefSeq) zinc transporter 1-like (A)	zinc transporter 1-like [Chenopodium quinoa]	RecName: Full=Zinc transporter 1; AltName: Full=ZRT/IRT-like protein 1; Flags: Precursor;	SubName: Full=Uncharacterized protein {ECO:0000313|EMBL:KNA24061.1}; Flags: Fragment;	Fe2+/Zn2+ regulated transporter	GO:0016021,integral component of membrane; GO:0005886,plasma membrane; GO:0005385,zinc ion transmembrane transporter activity	ZIP Zinc transporter
gene-LOC110698932	1.02	0.47	0.73	1.14	3.11	5.78	27	12	17	28	86	137	0.212	-2.24	0.0014696	0.0336187	down	NW_018744537.1	1621399	1622691	-	LOC110698932	--	--	uncharacterized protein LOC110698932 [Chenopodium quinoa]	--	SubName: Full=Uncharacterized protein {ECO:0000313|EMBL:KNA05034.1};	--	--	Protein of unknown function (DUF1645)
gene-LOC110698934	0.5	0.69	0.4	2.67	3.02	3.05	14	19	10	70	89	77	0.174	-2.52	4.34258e-09	6.29323e-07	down	NW_018742385.1	464740	475292	+	LOC110698934	--	K18812 cyclin D6, plant | (RefSeq) cyclin-D3-1-like isoform X1 (A)	cyclin-D3-1-like isoform X1 [Chenopodium quinoa]	--	SubName: Full=Uncharacterized protein {ECO:0000313|EMBL:KDO75678.1};	--	GO:0005634,nucleus; GO:0051726,regulation of cell cycle	Cyclin, N-terminal domain
gene-LOC110699017	0.13	0.03	0.15	1.21	0.76	0.5	4	1	4	35	25	14	0.123	-3.019	0.000335852	0.0114667	down	NW_018742385.1	650579	653858	-	LOC110699017	--	K02206 cyclin-dependent kinase 2 [EC:2.7.11.22] | (RefSeq) cyclin-dependent kinase A-1-like (A)	cyclin-dependent kinase A-1-like [Chenopodium quinoa]	RecName: Full=Cyclin-dependent kinase A-1; Short=CDKA;1; EC=2.7.11.22; EC=2.7.11.23; AltName: Full=Cell division control protein 2 homolog A;	SubName: Full=Cell division control protein 2 {ECO:0000313|EMBL:AAD30494.1}; Flags: Fragment;	Protein kinase PCTAIRE and related kinases	GO:0010005,cortical microtubule, transverse to long axis; GO:0005737,cytoplasm; GO:0005829,cytosol; GO:0072686,mitotic spindle; GO:0005634,nucleus; GO:0005886,plasma membrane; GO:0009574,preprophase band; GO:0005524,ATP binding; GO:0004693,cyclin-dependent protein serine/threonine kinase activity; GO:0016301,kinase activity; GO:0004672,protein kinase activity; GO:0008353,RNA polymerase II CTD hep…	Protein kinase domain
gene-LOC110699181	0.21	0.7	0.09	1.72	1.56	1.11	10	33	4	77	79	48	0.215	-2.22	0.000868041	0.0231435	down	NW_018744582.1	717903	723581	-	LOC110699181	--	--	BEL1-like homeodomain protein 9 [Chenopodium quinoa]	RecName: Full=BEL1-like homeodomain protein 9; Short=BEL1-like protein 9; AltName: Full=Protein BELLRINGER; AltName: Full=Protein LARSON; AltName: Full=Protein PENNYWISE; AltName: Full=Protein REPLUMLESS; AltName: Full=Protein VAAMANA;	SubName: Full=Uncharacterized protein {ECO:0000313|EMBL:KNA16868.1};	Transcription factor MEIS1 and related HOX domain proteins	GO:0005829,cytosol; GO:0005634,nucleus; GO:0003700,DNA-binding transcription factor activity; GO:0043565,sequence-specific DNA binding; GO:0048457,floral whorl morphogenesis; GO:0010154,fruit development; GO:0080006,internode patterning; GO:0010076,maintenance of floral meristem identity; GO:0010077,maintenance of inflorescence meristem identity; GO:0045892,negative regulation of transcription, D…	Associated with HOX
gene-LOC110699263	12.99	17.52	14.67	30.11	35.8	36.87	221	292	220	477	639	564	0.418	-1.259	1.42575e-07	1.48096e-05	down	NW_018744582.1	1616673	1619774	-	LOC110699263	--	K20896 formylaminopyrimidine deformylase / aminopyrimidine aminohydrolase [EC:3.5.1.- 3.5.99.-] | (RefSeq) uncharacterized LOC104904938 (A)	protein yippee-like [Chenopodium quinoa]	RecName: Full=Protein yippee-like;	SubName: Full=Uncharacterized protein {ECO:0000313|EMBL:GAY40410.1};	Predicted Yippee-type zinc-binding protein	GO:0046872,metal ion binding	Yippee zinc-binding/DNA-binding /Mis18, centromere assembly
gene-LOC110699320	1.45	1.85	1.13	3.64	4.2	5.47	77	96	53	180	234	261	0.317	-1.658	1.18753e-06	0.000101137	down	NW_018744582.1	2321931	2327718	-	LOC110699320	--	K13436 pto-interacting protein 1 [EC:2.7.11.1] | (RefSeq) pto-interacting protein 1-like isoform X1 (A)	probable inactive receptor-like protein kinase At3g56050 [Chenopodium quinoa]	RecName: Full=Inactive receptor-like serine/threonine-protein kinase At2g40270; Flags: Precursor;	SubName: Full=Uncharacterized protein {ECO:0000313|EMBL:KNA20969.1};	--	GO:0016021,integral component of membrane; GO:0005886,plasma membrane; GO:0005524,ATP binding; GO:0004675,transmembrane receptor protein serine/threonine kinase activity; GO:0007166,cell surface receptor signaling pathway; GO:0006468,protein phosphorylation	Protein tyrosine kinase
gene-LOC110699322	0	0.99	0.41	6.23	3.46	3.97	0	16	6	96	60	59	0.095	-3.389	2.36713e-05	0.00136607	down	NW_018744582.1	2362266	2363210	-	LOC110699322	--	--	--	--	--	--	--	--
gene-LOC110699331	12.92	26.38	43.14	15.18	4.53	4.58	223	446	656	244	82	71	3.371	1.753	0.00115432	0.0283958	up	NW_018744582.1	2447132	2447978	-	LOC110699331	--	K02898 large subunit ribosomal protein L26e | (RefSeq) 60S ribosomal protein L26-2-like (A)	60S ribosomal protein L26-2-like [Chenopodium quinoa]	RecName: Full=60S ribosomal protein L26-2;	SubName: Full=Putative ribosomal protein L26/L24P, eukaryotic/archaeal {ECO:0000313|EMBL:OTG15646.1};	60S ribosomal protein L26	GO:0022625,cytosolic large ribosomal subunit; GO:0022626,cytosolic ribosome; GO:0042788,polysomal ribosome; GO:0003723,RNA binding; GO:0003735,structural constituent of ribosome; GO:0002181,cytoplasmic translation; GO:0042273,ribosomal large subunit biogenesis	Ribosomal proteins L26 eukaryotic, L24P archaeal
gene-LOC110699377	3.74	2.14	2.1	6.44	14.42	21.14	164	92	81	263	663	833	0.182	-2.456	2.49076e-06	0.000193343	down	NW_018744582.1	2889615	2897473	+	LOC110699377	--	K14638 solute carrier family 15 (peptide/histidine transporter), member 3/4 | (RefSeq) protein NRT1/ PTR FAMILY 5.2-like (A)	protein NRT1/ PTR FAMILY 5.1-like [Chenopodium quinoa]	RecName: Full=Protein NRT1/ PTR FAMILY 5.1; Short=AtNPF5.1;	SubName: Full=Uncharacterized protein {ECO:0000313|EMBL:KNA13011.1};	H+/oligopeptide symporter	GO:0016021,integral component of membrane; GO:0022857,transmembrane transporter activity; GO:0009624,response to nematode	POT family
gene-LOC110699385	11.89	6.75	4.32	0	0	0	378	210	121	0	0	0	1259.08	10.298	2.03426e-15	7.94687e-13	up	NW_018744582.1	2994831	2997373	+	LOC110699385	--	K23810 (E)-8-carboxylinalool synthase [EC:1.14.14.-] | (RefSeq) geraniol 8-hydroxylase (A)	cytochrome P450 76AD1-like [Chenopodium quinoa]	RecName: Full=Cytochrome P450 76AD1 {ECO:0000303|PubMed:22660548}; EC=1.14.-.- {ECO:0000305};	SubName: Full=CYP76AD1 {ECO:0000313|EMBL:AQS22859.1};	Cytochrome P450 CYP2 subfamily	GO:0016021,integral component of membrane; GO:0020037,heme binding; GO:0005506,iron ion binding; GO:0004497,monooxygenase activity; GO:0016705,oxidoreductase activity, acting on paired donors, with incorporation or reduction of molecular oxygen	Cytochrome P450
gene-LOC110699387	0.75	0.49	0.64	0	0	0	28	18	21	0	0	0	119.52	6.901	1.29551e-06	0.000108643	up	NW_018744582.1	2956853	2960047	+	LOC110699387	--	--	--	--	--	--	--	--
gene-LOC110699465	0.68	0.96	0.42	1.77	2.08	1.86	24	33	13	58	77	59	0.344	-1.539	0.000605641	0.0178562	down	NW_018744582.1	2285119	2287397	-	LOC110699465	--	K00975 glucose-1-phosphate adenylyltransferase [EC:2.7.7.27] | (RefSeq) putative two-component response regulator ARR21 (A)	two-component response regulator ARR1-like [Chenopodium quinoa]	RecName: Full=Putative Myb family transcription factor At1g14600;	SubName: Full=Uncharacterized protein {ECO:0000313|EMBL:KNA13375.1};	--	GO:0005634,nucleus; GO:0003677,DNA binding; GO:0003700,DNA-binding transcription factor activity; GO:0006355,regulation of transcription, DNA-templated; GO:0006351,transcription, DNA-templated	Myb-like DNA-binding domain
gene-LOC110699483	4.63	2.51	1.76	7.84	10.51	12.03	200	106	67	315	476	467	0.287	-1.8	8.85068e-05	0.00399615	down	NW_018744583.1	153783	171268	+	LOC110699483	--	K23678 solute carrier family 66 (lysosomal lysine-arginine transporter), member 1 | (RefSeq) uncharacterized protein LOC110699483 (A)	uncharacterized protein LOC110699483 [Chenopodium quinoa]	--	SubName: Full=Uncharacterized protein {ECO:0000313|EMBL:KNA13197.1};	Predicted membrane protein	GO:0016021,integral component of membrane	PQ loop repeat
gene-LOC110699505	3.15	5.44	4.74	0	0	0	55	93	73	0	0	0	384.632	8.587	1.272e-11	2.94939e-09	up	NW_018744583.1	222413	223565	+	LOC110699505	--	--	--	--	--	--	--	--
gene-LOC110699542	0	0	0	0	0.78	1.52	0	0	0	0	18	30	0.011	-6.573	0.00235871	0.0463282	down	NW_018744591.1	485367	488418	-	LOC110699542	--	--	--	--	--	--	--	--
gene-LOC110699921	2.78	3.22	3.05	5.98	4.24	9.09	112	127	108	224	179	329	0.45	-1.152	0.00122501	0.0296079	down	NW_018744603.1	508018	513828	-	LOC110699921	--	--	uncharacterized protein LOC110699921 [Chenopodium quinoa]	--	SubName: Full=Uncharacterized protein {ECO:0000313|EMBL:KNA11822.1};	--	--	Ceramidase
gene-LOC110699924	12.31	2.08	9.27	0.96	1.41	1.42	549	91	364	40	66	57	6.198	2.632	3.0005e-05	0.00166674	up	NW_018744603.1	626230	631402	-	LOC110699924	--	K01840 phosphomannomutase [EC:5.4.2.8] | (RefSeq) uncharacterized protein LOC107434468 (A)	uncharacterized protein LOC110699924 [Chenopodium quinoa]	--	SubName: Full=Uncharacterized protein {ECO:0000313|EMBL:KNA03284.1};	Phosphoglucomutase/phosphomannomutase	GO:0016868,intramolecular transferase activity, phosphotransferases; GO:0005975,carbohydrate metabolic process	Phosphoglucomutase/phosphomannomutase, alpha/beta/alpha domain I
gene-LOC110699934	0	0.05	0	0	1.45	2.02	0	1	0	0	30	36	0.015	-6.056	0.00184754	0.0393545	down	NW_018744603.1	1210438	1212727	+	LOC110699934	--	--	--	--	--	--	--	--
gene-LOC110700154	18.23	36.44	40.27	14.45	10.16	9.95	534	1045	1039	394	312	262	2.633	1.396	4.41245e-06	0.000320371	up	NW_018744620.1	1180020	1181456	-	LOC110700154	--	--	protein E6-like [Chenopodium quinoa]	--	SubName: Full=Uncharacterized protein {ECO:0000313|EMBL:KNA15890.1};	--	--	--
gene-LOC110700174	8.55	3.47	10.13	0.86	1.04	0.63	181	72	189	17	23	12	8.608	3.106	1.38223e-08	1.76788e-06	up	NW_018744620.1	1971264	1972302	-	LOC110700174	--	--	fasciclin-like arabinogalactan protein 9 [Chenopodium quinoa]	RecName: Full=Fasciclin-like arabinogalactan protein 9; Flags: Precursor;	SubName: Full=Uncharacterized protein {ECO:0000313|EMBL:KNA15304.1};	--	GO:0031225,anchored component of membrane; GO:0046658,anchored component of plasma membrane; GO:0005886,plasma membrane	Fasciclin domain
gene-LOC110700307	4.78	8.41	9.04	4.47	2.12	2.15	178	307	297	155	83	72	2.482	1.312	0.000298294	0.010378	up	NW_018744626.1	683343	688614	-	LOC110700307	--	--	protein PEP-RELATED DEVELOPMENT ARRESTED 1, chloroplastic-like [Chenopodium quinoa]	RecName: Full=Protein PEP-RELATED DEVELOPMENT ARRESTED 1, chloroplastic {ECO:0000303|PubMed:24132784}; Short=AtPRDA1 {ECO:0000303|PubMed:24132784}; Flags: Precursor;	SubName: Full=Uncharacterized protein isoform 1 {ECO:0000313|EMBL:EOX93757.1};	--	GO:0042644,chloroplast nucleoid; GO:0009658,chloroplast organization; GO:0006355,regulation of transcription, DNA-templated	--
gene-LOC110700371	2.57	1.45	3.42	1.21	0.6	0.56	168	93	197	74	41	33	3.148	1.654	0.00044735	0.0142507	up	NW_018744626.1	1398361	1416825	-	LOC110700371	--	--	protein MICRORCHIDIA 6-like [Chenopodium quinoa]	RecName: Full=Protein MICRORCHIDIA 6 {ECO:0000303|PubMed:22555433}; Short=AtMORC6 {ECO:0000303|PubMed:22555433}; EC=3.6.-.- {ECO:0000269|PubMed:22560611}; AltName: Full=Protein CRT1-homolog 6 {ECO:0000303|PubMed:19704828}; Short=CRT1-h6 {ECO:0000303|PubMed:19704828}; AltName: Full=Protein DEFECTIVE IN MERISTEM SILENCING 11 {ECO:0000303|PubMed:22560611};	SubName: Full=Uncharacterized protein {ECO:0000313|EMBL:KNA15292.1};	MORC family ATPases	GO:0009941,chloroplast envelope; GO:0005634,nucleus; GO:0009506,plasmodesma; GO:0005524,ATP binding; GO:0016887,ATPase activity; GO:0003677,DNA binding; GO:0004519,endonuclease activity; GO:0042803,protein homodimerization activity; GO:0003723,RNA binding; GO:0016569,covalent chromatin modification; GO:0006952,defense response; GO:0006281,DNA repair; GO:1902290,positive regulation of defense resp…	Morc6 ribosomal protein S5 domain 2-like
gene-LOC110700412	5.86	3.78	4.16	8.37	12.51	18.98	321	203	201	427	719	935	0.333	-1.585	0.000166365	0.00659951	down	NW_018744626.1	1949883	1952571	-	LOC110700412	--	K10260 F-box and WD-40 domain protein 7 | (RefSeq) WD40 repeat protein (A)	U-box domain-containing protein 19-like [Chenopodium quinoa]	RecName: Full=U-box domain-containing protein 19; EC=2.3.2.27; AltName: Full=Plant U-box protein 19; AltName: Full=RING-type E3 ubiquitin transferase PUB19 {ECO:0000305};	RecName: Full=RING-type E3 ubiquitin transferase {ECO:0000256|SAAS:SAAS00702733}; EC=2.3.2.27 {ECO:0000256|SAAS:SAAS00702733};	FOG: Armadillo/beta-catenin-like repeats	GO:0005737,cytoplasm; GO:0005634,nucleus; GO:0004842,ubiquitin-protein transferase activity; GO:0010029,regulation of seed germination	U-box domain
gene-LOC110700414	6.18	3.13	2.34	6.79	29.02	10.24	522	259	174	534	2569	777	0.243	-2.04	0.000945255	0.0245277	down	NW_018744626.1	2052596	2059772	+	LOC110700414	--	K16055 trehalose 6-phosphate synthase/phosphatase [EC:2.4.1.15 3.1.3.12] | (RefSeq) probable alpha,alpha-trehalose-phosphate synthase [UDP-forming] 9 isoform X1 (A)	probable alpha,alpha-trehalose-phosphate synthase [UDP-forming]	RecName: Full=Probable alpha,alpha-trehalose-phosphate synthase [UDP-forming] 9; EC=2.4.1.15; AltName: Full=Trehalose-6-phosphate synthase 9; Short=AtTPS9;	SubName: Full=Uncharacterized protein {ECO:0000313|EMBL:KNA06858.1};	Trehalose-6-phosphate synthase component TPS1 and related subunits	GO:0005737,cytoplasm; GO:0016791,phosphatase activity; GO:0016757,transferase activity, transferring glycosyl groups; GO:0005992,trehalose biosynthetic process; GO:0070413,trehalose metabolism in response to stress	Glycosyltransferase family 20
gene-LOC110700425	0.59	0.17	0.09	0.35	1.6	5.79	29	8	4	16	82	254	0.108	-3.214	0.00127709	0.030538	down	NW_018744626.1	2160746	2164041	+	LOC110700425	--	K07426 cytochrome P450 family 4 subfamily B polypeptide 1 [EC:1.14.14.1] | (RefSeq) cytochrome P450 CYP72A219-like (A)	cytochrome P450 CYP72A219-like isoform X1 [Chenopodium quinoa]	RecName: Full=Cytochrome P450 CYP72A219; EC=1.14.-.-; AltName: Full=Cytochrome P450 CYP72A129;	SubName: Full=Uncharacterized protein {ECO:0000313|EMBL:KNA05769.1};	Cytochrome P450 CYP4/CYP19/CYP26 subfamilies	GO:0016021,integral component of membrane; GO:0020037,heme binding; GO:0005506,iron ion binding; GO:0004497,monooxygenase activity; GO:0016705,oxidoreductase activity, acting on paired donors, with incorporation or reduction of molecular oxygen	Cytochrome P450
gene-LOC110700427	0.76	0.39	0.4	0.59	4.09	8.66	28	14	13	20	157	285	0.111	-3.176	0.000155609	0.00625533	down	NW_018744626.1	2165633	2168531	+	LOC110700427	--	--	--	--	--	--	--	--
gene-LOC110700570	2.58	3.13	2.55	4	6.24	9.88	86	102	75	124	218	296	0.387	-1.371	0.00126636	0.0303419	down	NW_018744626.1	3920624	3930503	-	LOC110700570	--	--	uncharacterized protein LOC110700570 isoform X1 [Chenopodium quinoa]	--	SubName: Full=Uncharacterized protein {ECO:0000313|EMBL:KMS97471.1};	--	--	--
gene-LOC110700600	6.46	9.17	14.32	4.27	1.94	2.54	133	185	260	82	42	47	3.345	1.742	1.97768e-05	0.00117484	up	NW_018744626.1	4379497	4382289	+	LOC110700600	--	K01855 tRNA pseudouridine38/39 synthase [EC:5.4.99.45] | (RefSeq) pus4; tRNA pseudouridine synthase mitochondrial precursor (A)	protein EMBRYO DEFECTIVE 514-like [Chenopodium quinoa]	RecName: Full=Protein EMBRYO DEFECTIVE 514 {ECO:0000303|PubMed:15341625}; AltName: Full=Protein DOMINO 1 {ECO:0000303|PubMed:15341625};	SubName: Full=Uncharacterized protein {ECO:0000313|EMBL:KNA21101.1};	--	GO:0005634,nucleus; GO:0009793,embryo development ending in seed dormancy; GO:0017126,nucleologenesis; GO:0051302,regulation of cell division	Protein of unknown function (DUF3223)
gene-LOC110700730	2.57	2.69	1.64	5.01	4.54	4.78	110	113	62	200	204	184	0.467	-1.098	0.000276902	0.00988485	down	NW_018744626.1	6238084	6240805	+	LOC110700730	--	--	transcription factor TCP17-like [Chenopodium quinoa]	RecName: Full=Transcription factor TCP5;	SubName: Full=Uncharacterized protein {ECO:0000313|EMBL:KNA21953.1};	--	GO:0005634,nucleus; GO:0003677,DNA binding; GO:0003700,DNA-binding transcription factor activity; GO:0030154,cell differentiation; GO:0048366,leaf development; GO:0009965,leaf morphogenesis; GO:0045962,positive regulation of development, heterochronic; GO:0006355,regulation of transcription, DNA-templated; GO:0006351,transcription, DNA-templated	TCP family transcription factor
gene-LOC110700790	0.77	0.59	0.46	1.34	2.3	1.13	80	60	42	129	250	105	0.369	-1.436	0.00131833	0.0312127	down	NW_018742390.1	8390916	8400021	+	LOC110700790	--	--	--	--	--	--	--	--
gene-LOC110700846	30.93	21	39.52	128.02	61.3	216.89	191	127	215	736	397	1204	0.219	-2.188	6.44784e-06	0.000438063	down	NW_018744626.1	771620	771922	+	LOC110700846	--	--	putative lipid-transfer protein DIR1 [Chenopodium quinoa]	RecName: Full=Putative lipid-transfer protein DIR1; AltName: Full=Protein DEFECTIVE IN INDUCED RESISTANCE 1; Flags: Precursor;	SubName: Full=Uncharacterized protein {ECO:0000313|EMBL:KNA05451.1};	--	GO:0048046,apoplast; GO:0005783,endoplasmic reticulum; GO:0009506,plasmodesma; GO:0005504,fatty acid binding; GO:0043621,protein self-association; GO:0008270,zinc ion binding; GO:0006869,lipid transport; GO:0009627,systemic acquired resistance; GO:0009862,systemic acquired resistance, salicylic acid mediated signaling pathway	Probable lipid transfer
gene-LOC110700928	1	0.22	0.14	0.78	2.46	6.59	33	7	4	24	85	195	0.136	-2.875	0.00233019	0.0459138	down	NW_018744633.1	1556764	1563171	-	LOC110700928	--	K15322 tRNA-splicing endonuclease subunit Sen2 [EC:3.1.27.9] | (RefSeq) tRNA-splicing endonuclease subunit Sen2-1-like isoform X1 (A)	phosphatidylinositol transfer protein 1-like [Chenopodium quinoa]	--	SubName: Full=Uncharacterized protein {ECO:0000313|EMBL:KNA04946.1};	Phosphatidylinositol transfer protein	GO:0005622,intracellular; GO:0005548,phospholipid transporter activity	Phosphatidylinositol transfer protein
gene-LOC110700947	8.17	10.27	8.23	24.09	23.55	19.94	274	337	243	752	828	601	0.38	-1.397	4.94937e-13	1.45804e-10	down	NW_018744633.1	2122261	2127794	+	LOC110700947	--	--	--	--	--	--	--	--
gene-LOC110700950	0	0	0	0.65	0.32	0.42	0	0	0	27	15	17	0.009	-6.768	2.75356e-06	0.000211459	down	NW_018744633.1	2280822	2283370	+	LOC110700950	--	--	uncharacterized protein LOC110700950 [Chenopodium quinoa]	--	SubName: Full=Uncharacterized protein {ECO:0000313|EMBL:KNA04462.1};	--	--	--
gene-LOC110700963	0.52	0.62	0.6	3.39	2.71	1.61	62	73	63	379	342	174	0.219	-2.192	1.31688e-11	3.0339e-09	down	NW_018744633.1	2632259	2641984	+	LOC110700963	--	--	uncharacterized protein LOC110700963 isoform X1 [Chenopodium quinoa]	--	SubName: Full=Uncharacterized protein {ECO:0000313|EMBL:ERP47441.1};	--	--	Erythropoietin receptor, ligand binding
gene-LOC110700975	0.08	0.33	0.22	0	0	0	5	20	12	0	0	0	63.112	5.98	0.000310798	0.0107612	up	NW_018744633.1	2746086	2751532	-	LOC110700975	--	--	--	--	--	--	--	--
gene-LOC110700994	2.22	3.37	4.71	1.47	0.69	0.49	55	82	103	34	18	11	3.804	1.927	0.000162198	0.00646993	up	NW_018744633.1	2937523	2941096	-	LOC110700994	--	K00599 methyltransferase-like protein 6 [EC:2.1.1.-] | (RefSeq) hypothetical protein (A)	protein N-lysine methyltransferase METTL21A-like [Chenopodium quinoa]	--	SubName: Full=Uncharacterized protein {ECO:0000313|EMBL:KNA19105.1};	--	--	Lysine methyltransferase
gene-LOC110701002	61.53	85.91	97.94	46.31	33.88	36.71	2336	3194	3276	1637	1349	1253	2.025	1.018	7.26189e-07	6.49235e-05	up	NW_018744633.1	3002830	3006168	-	LOC110701002	--	K07375 tubulin beta | (RefSeq) tubulin beta-5 chain-like (A)	tubulin beta-5 chain-like [Chenopodium quinoa]	RecName: Full=Tubulin beta-4 chain; AltName: Full=Beta-4-tubulin;	RecName: Full=Tubulin beta chain {ECO:0000256|RuleBase:RU000352};	Beta tubulin	GO:0005737,cytoplasm; GO:0005874,microtubule; GO:0005525,GTP binding; GO:0003924,GTPase activity; GO:0005200,structural constituent of cytoskeleton; GO:0007017,microtubule-based process	Tubulin/FtsZ family, GTPase domain
gene-LOC110701015	5.59	5.83	7.81	2.11	1.11	1.64	91	93	112	32	19	24	3.873	1.953	4.3041e-07	4.09231e-05	up	NW_018744633.1	3151910	3153210	-	LOC110701015	--	K03505 DNA polymerase delta subunit 4 | (RefSeq) uncharacterized protein LOC110701015 (A)	uncharacterized protein LOC110701015 [Chenopodium quinoa]	--	SubName: Full=Uncharacterized protein {ECO:0000313|EMBL:KNA13736.1};	--	GO:0005634,nucleus; GO:0006260,DNA replication	DNA polymerase delta, subunit 4
gene-LOC110701028	0.02	0	0.11	0.12	0.18	2.11	1	0	4	5	8	82	0.049	-4.357	0.0021986	0.0440946	down	NW_018744633.1	3243009	3245823	-	LOC110701028	--	K00423 L-ascorbate oxidase [EC:1.10.3.3] | (RefSeq) L-ascorbate oxidase homolog (A)	L-ascorbate oxidase homolog [Chenopodium quinoa]	RecName: Full=L-ascorbate oxidase homolog; EC=1.10.3.-; Flags: Precursor;	SubName: Full=Uncharacterized protein {ECO:0000313|EMBL:KNA11237.1};	Multicopper oxidases	GO:0005576,extracellular region; GO:0005507,copper ion binding; GO:0016491,oxidoreductase activity	Multicopper oxidase
gene-LOC110701052	13.1	18.62	10.87	25.9	33.01	23.14	454	632	332	836	1200	721	0.494	-1.018	0.000375555	0.0124258	down	NW_018744633.1	3487784	3492538	-	LOC110701052	--	K13065 shikimate O-hydroxycinnamoyltransferase [EC:2.3.1.133] | (RefSeq) omega-hydroxypalmitate O-feruloyl transferase-like (A)	omega-hydroxypalmitate O-feruloyl transferase-like [Chenopodium quinoa]	RecName: Full=Omega-hydroxypalmitate O-feruloyl transferase; EC=2.3.1.188; AltName: Full=Omega-hydroxyacid hydroxycinnamoyltransferase; AltName: Full=Protein ALIPHATIC SUBERIN FERULOYL TRANSFERASE;	SubName: Full=Anthranilate N-benzoyltransferase protein, putative {ECO:0000313|EMBL:EEF47341.1}; EC=2.3.1.144 {ECO:0000313|EMBL:EEF47341.1};	--	GO:0050734,hydroxycinnamoyltransferase activity; GO:0102406,omega-hydroxypalmitate O-sinapoyl transferase activity; GO:0052325,cell wall pectin biosynthetic process; GO:0010345,suberin biosynthetic process	Transferase family
gene-LOC110701066	1.01	1.3	1.07	3.05	2.58	3.14	98	124	92	277	264	275	0.37	-1.434	5.86131e-10	9.70752e-08	down	NW_018744633.1	3588538	3598587	+	LOC110701066	--	K11592 endoribonuclease Dicer [EC:3.1.26.-] | (RefSeq) endoribonuclease Dicer homolog 2-like (A)	endoribonuclease Dicer homolog 2-like [Chenopodium quinoa]	RecName: Full=Endoribonuclease Dicer homolog 2; EC=3.1.26.-; AltName: Full=Dicer-like protein 2; Short=AtDCL2;	SubName: Full=Uncharacterized protein {ECO:0000313|EMBL:KNA10399.1};	dsRNA-specific nuclease Dicer and related ribonucleases	GO:0005737,cytoplasm; GO:0005634,nucleus; GO:0016442,RISC complex; GO:0005524,ATP binding; GO:0004386,helicase activity; GO:0046872,metal ion binding; GO:0004525,ribonuclease III activity; GO:0003723,RNA binding; GO:0010216,maintenance of DNA methylation; GO:0010267,production of ta-siRNAs involved in RNA interference; GO:0051214,RNA virus induced gene silencing	Ribonuclease III domain
gene-LOC110701071	12.44	7.96	4.6	14.54	22.41	34.7	479	300	156	521	905	1201	0.337	-1.567	0.00157681	0.0352649	down	NW_018744633.1	3632529	3636151	+	LOC110701071	--	K08057 calreticulin | (RefSeq) calreticulin-3-like (A)	calreticulin-3-like [Chenopodium quinoa]	RecName: Full=Calreticulin-3; AltName: Full=Protein PRIORITY IN SWEET LIFE 1; Flags: Precursor;	SubName: Full=Uncharacterized protein {ECO:0000313|EnsemblPlants:GLYMA18G47931.1};	Calreticulin	GO:0005783,endoplasmic reticulum; GO:0005788,endoplasmic reticulum lumen; GO:0005789,endoplasmic reticulum membrane; GO:0005509,calcium ion binding; GO:0030246,carbohydrate binding; GO:0051082,unfolded protein binding; GO:0046283,anthocyanin-containing compound metabolic process; GO:0010204,defense response signaling pathway, resistance gene-independent; GO:0042742,defense response to bacterium; …	Calreticulin family
gene-LOC110701132	0	0	0	7.02	19.08	13.49	0	0	0	331	1013	614	0	-11.85	1.64858e-20	1.16176e-17	down	NW_018744633.1	4228890	4232393	-	LOC110701132	--	K05391 cyclic nucleotide gated channel, plant | (RefSeq) cyclic nucleotide-gated ion channel 1-like (A)	wall-associated receptor kinase-like 1 [Chenopodium quinoa]	RecName: Full=Wall-associated receptor kinase-like 2; EC=2.7.11.-; Flags: Precursor;	SubName: Full=Uncharacterized protein {ECO:0000313|EMBL:KNA26003.1};	--	GO:0016021,integral component of membrane; GO:0009505,plant-type cell wall; GO:0005886,plasma membrane; GO:0005524,ATP binding; GO:0005509,calcium ion binding; GO:0030247,polysaccharide binding; GO:0004674,protein serine/threonine kinase activity; GO:0007166,cell surface receptor signaling pathway; GO:0046777,protein autophosphorylation	Protein kinase domain
gene-LOC110701145	0	0	0	3.89	3.12	4.76	0	0	0	216	195	255	0.001	-10.294	5.9615e-17	2.78255e-14	down	NW_018744633.1	4236811	4240274	-	LOC110701145	--	K05391 cyclic nucleotide gated channel, plant | (RefSeq) cyclic nucleotide-gated ion channel 1-like (A)	wall-associated receptor kinase-like 8 [Chenopodium quinoa]	RecName: Full=Wall-associated receptor kinase-like 8; EC=2.7.11.-; Flags: Precursor;	SubName: Full=Uncharacterized protein {ECO:0000313|EMBL:KNA26004.1};	--	GO:0016021,integral component of membrane; GO:0005886,plasma membrane; GO:0005524,ATP binding; GO:0005509,calcium ion binding; GO:0030247,polysaccharide binding; GO:0004674,protein serine/threonine kinase activity; GO:0007166,cell surface receptor signaling pathway	Protein kinase domain
gene-LOC110701176	0.81	0.46	0.59	0.75	3.28	10.7	36	20	23	31	153	428	0.119	-3.073	0.000163701	0.006501	down	NW_018744633.1	4571902	4574085	-	LOC110701176	--	K05953 nicotianamine synthase [EC:2.5.1.43] | (RefSeq) nicotianamine synthase-like (A)	nicotianamine synthase-like [Chenopodium quinoa]	RecName: Full=Nicotianamine synthase; EC=2.5.1.43; AltName: Full=Chloronerva; AltName: Full=S-adenosyl-L-methionine:S-adenosyl-L-methionine:S-adenosyl-methionine 3-amino-3-carboxypropyltransferase;	SubName: Full=Uncharacterized protein {ECO:0000313|EMBL:KNA06923.1};	--	GO:0030410,nicotianamine synthase activity; GO:0030418,nicotianamine biosynthetic process	Nicotianamine synthase protein
gene-LOC110701188	5.83	8.74	11.39	5.74	2.5	2.73	107	157	184	98	48	45	2.324	1.217	0.00261287	0.0495436	up	NW_018744633.1	4697696	4700750	-	LOC110701188	--	--	uncharacterized protein LOC110701188 [Chenopodium quinoa]	--	SubName: Full=Uncharacterized protein {ECO:0000313|EMBL:KNA13063.1};	--	--	IGR protein motif
gene-LOC110701203	417.23	338.94	382.86	11.54	16	15.85	13673	10877	11053	352	550	467	25.254	4.658	6.02823e-60	5.41636e-56	up	NW_018744633.1	4798711	4802645	+	LOC110701203	--	--	--	--	--	--	--	--
gene-LOC110701254	11.44	9.36	8.63	16.19	26.72	25.19	858	687	570	1130	2101	1698	0.414	-1.272	0.000140124	0.00576047	down	NW_018744633.1	5371060	5376007	+	LOC110701254	--	K12126 phytochrome-interacting factor 3 | (RefSeq) transcription factor PIF3-like isoform X1 (A)	transcription factor PIF3-like isoform X1 [Chenopodium quinoa]	RecName: Full=Transcription factor PIF3; AltName: Full=Basic helix-loop-helix protein 8; Short=AtbHLH8; Short=bHLH 8; AltName: Full=Phytochrome-associated protein 3; AltName: Full=Phytochrome-interacting factor 3; AltName: Full=Transcription factor EN 100; AltName: Full=bHLH transcription factor bHLH008;	SubName: Full=Uncharacterized protein {ECO:0000313|EMBL:KNA17491.1};	--	GO:0005634,nucleus; GO:0003677,DNA binding; GO:0003700,DNA-binding transcription factor activity; GO:0042802,identical protein binding; GO:0046983,protein dimerization activity; GO:0009704,de-etiolation; GO:0009740,gibberellic acid mediated signaling pathway; GO:0031539,positive regulation of anthocyanin metabolic process; GO:0010017,red or far-red light signaling pathway; GO:0009585,red, far-red…	Helix-loop-helix DNA-binding domain
gene-LOC110701294	16.08	16.09	13.76	8.37	3.89	4.86	394	386	297	191	100	107	2.661	1.412	4.03035e-06	0.000295893	up	NW_018744633.1	5871478	5873963	+	LOC110701294	--	--	psbP domain-containing protein 2, chloroplastic-like [Chenopodium quinoa]	RecName: Full=PsbP domain-containing protein 2, chloroplastic; AltName: Full=PsbP-related thylakoid lumenal protein 3; Flags: Precursor;	SubName: Full=Uncharacterized protein {ECO:0000313|EMBL:KNA11205.1};	--	GO:0009507,chloroplast; GO:0009543,chloroplast thylakoid lumen; GO:0019898,extrinsic component of membrane; GO:0009654,photosystem II oxygen evolving complex; GO:0009579,thylakoid; GO:0005509,calcium ion binding; GO:0015979,photosynthesis	PsbP
gene-LOC110701295	2.86	1.82	1.1	2.85	5.24	11.39	148	92	50	137	284	529	0.285	-1.812	0.00254008	0.0487142	down	NW_018744633.1	5881187	5887346	-	LOC110701295	--	K18875 enhanced disease susceptibility 1 protein | (RefSeq) protein EDS1L-like (A)	lipase-like PAD4 [Chenopodium quinoa]	RecName: Full=Lipase-like PAD4; EC=2.3.1.-; AltName: Full=Protein ENHANCED DISEASE SUSCEPTIBILITY 9; AltName: Full=Protein PHYTOALEXIN DEFICIENT 4; Short=AtPAD4;	SubName: Full=Uncharacterized protein {ECO:0000313|EMBL:KNA14778.1};	--	GO:0005737,cytoplasm; GO:0005634,nucleus; GO:0016298,lipase activity; GO:0016740,transferase activity; GO:0010618,aerenchyma formation; GO:0071327,cellular response to trehalose stimulus; GO:0009816,defense response to bacterium, incompatible interaction; GO:0002213,defense response to insect; GO:0009873,ethylene-activated signaling pathway; GO:0010150,leaf senescence; GO:0016042,lipid catabolic …	Enhanced disease susceptibility 1 protein EP domain
gene-LOC110701403	2.83	1.41	1.05	6	14.93	28.41	107	52	35	211	591	964	0.103	-3.275	1.90878e-07	1.90032e-05	down	NW_018744633.1	7180249	7182100	-	LOC110701403	--	K03320 ammonium transporter, Amt family | (RefSeq) ammonium transporter 1 member 2-like (A)	ammonium transporter 1 member 2-like [Chenopodium quinoa]	RecName: Full=Ammonium transporter 1 member 2; AltName: Full=LeAMT1;2;	RecName: Full=Ammonium transporter {ECO:0000256|RuleBase:RU362002};	Ammonia permease	GO:0005887,integral component of plasma membrane; GO:0008519,ammonium transmembrane transporter activity; GO:0072488,ammonium transmembrane transport; GO:0015696,ammonium transport; GO:0015843,methylammonium transport; GO:0015695,organic cation transport; GO:0009624,response to nematode	Ammonium Transporter Family
gene-LOC110701404	0	0	0	0.19	0.14	2.87	0	0	0	7	6	103	0.004	-7.891	9.42862e-06	0.000609469	down	NW_018744633.1	7193066	7195027	-	LOC110701404	--	--	--	--	--	--	--	--
gene-LOC110701516	19.81	13.88	10.79	35.31	56.69	47.41	1106	759	531	1836	3320	2380	0.309	-1.696	4.61625e-06	0.000331816	down	NW_018742204.1	2932061	2940488	+	LOC110701516	--	K21989 calcium permeable stress-gated cation channel | (RefSeq) CSC1-like protein ERD4 (A)	CSC1-like protein ERD4 [Chenopodium quinoa]	RecName: Full=CSC1-like protein ERD4; AltName: Full=Protein EARLY-RESPONSIVE TO DEHYDRATION STRESS 4;	SubName: Full=Uncharacterized protein {ECO:0000313|EMBL:KNA19423.1};	Uncharacterized conserved protein	GO:0009507,chloroplast; GO:0009941,chloroplast envelope; GO:0016021,integral component of membrane; GO:0016020,membrane; GO:0005886,plasma membrane; GO:0009506,plasmodesma; GO:0005774,vacuolar membrane; GO:0005773,vacuole; GO:0006811,ion transport	Calcium-dependent channel, 7TM region, putative phosphate
gene-LOC110701578	8.21	6.07	11.68	4.26	1.35	2.73	87	63	109	42	15	26	3.116	1.64	0.00130493	0.0310132	up	NW_018742393.1	1937465	1938134	-	LOC110701578	--	--	uncharacterized protein LOC110701578 [Chenopodium quinoa]	--	SubName: Full=Uncharacterized protein {ECO:0000313|EMBL:KNA11543.1};	--	--	--
gene-LOC110701589	0.21	0.08	0.09	0.64	0.86	0.54	21	8	8	59	89	48	0.188	-2.414	3.53203e-05	0.00190889	down	NW_018744633.1	3979544	3986372	+	LOC110701589	--	K05391 cyclic nucleotide gated channel, plant | (RefSeq) cyclic nucleotide-gated ion channel 1-like (A)	uncharacterized protein LOC110701589 [Chenopodium quinoa]	RecName: Full=Wall-associated receptor kinase 2; EC=2.7.11.-; Flags: Precursor;	SubName: Full=Uncharacterized protein {ECO:0000313|EMBL:KNA05209.1};	--	GO:0005623,cell; GO:0016021,integral component of membrane; GO:0005524,ATP binding; GO:0005509,calcium ion binding; GO:0030247,polysaccharide binding; GO:0004674,protein serine/threonine kinase activity; GO:0007166,cell surface receptor signaling pathway; GO:0009992,cellular water homeostasis; GO:0009311,oligosaccharide metabolic process; GO:0009751,response to salicylic acid; GO:0009826,unidimen…	Protein kinase domain
gene-LOC110701609	4.78	8.25	4.44	0.37	0	0	55	93	45	4	0	0	46.891	5.551	3.07179e-09	4.58091e-07	up	NW_018744633.1	848817	851260	-	LOC110701609	--	--	--	--	--	--	--	--
gene-LOC110701687	35.73	69.71	126.78	40.65	12.77	11.52	659	1259	2060	698	247	191	3.559	1.831	0.000635323	0.0183041	up	NW_018744647.1	2026244	2027148	+	LOC110701687	--	K02870 large subunit ribosomal protein L12e | (RefSeq) 60S ribosomal protein L12-1 (A)	60S ribosomal protein L12-1 [Chenopodium quinoa]	RecName: Full=60S ribosomal protein L12-1;	SubName: Full=Uncharacterized protein {ECO:0000313|EMBL:KNA25907.1};	40S ribosomal protein S2	GO:0009507,chloroplast; GO:0005829,cytosol; GO:0022625,cytosolic large ribosomal subunit; GO:0022626,cytosolic ribosome; GO:0005730,nucleolus; GO:0005634,nucleus; GO:0009506,plasmodesma; GO:0005773,vacuole; GO:0019843,rRNA binding; GO:0003735,structural constituent of ribosome; GO:0008270,zinc ion binding; GO:0009409,response to cold; GO:0000027,ribosomal large subunit assembly; GO:0006412,transl…	Ribosomal protein L11, N-terminal domain
gene-LOC110701689	65.75	49.17	35.75	111.94	85.82	141.77	1860	1362	891	2948	2546	3605	0.435	-1.201	0.000496327	0.0154519	down	NW_018744647.1	2255038	2258299	+	LOC110701689	--	K09872 aquaporin PIP | (RefSeq) probable aquaporin PIP2-5 (A)	probable aquaporin PIP2-5 [Chenopodium quinoa]	RecName: Full=Probable aquaporin PIP2-5; AltName: Full=Plasma membrane intrinsic protein 2-5; Short=AtPIP2;5; AltName: Full=Plasma membrane intrinsic protein 2d; Short=PIP2d;	SubName: Full=Uncharacterized protein {ECO:0000313|EMBL:KNA13853.1};	Aquaporin (major intrinsic protein family)	GO:0005887,integral component of plasma membrane; GO:0015250,water channel activity; GO:0034220,ion transmembrane transport; GO:0006833,water transport	Major intrinsic protein
gene-LOC110701709	2.44	2.88	2.87	1.73	1.13	1.09	212	245	219	140	103	85	2.02	1.015	4.08673e-05	0.00215996	up	NW_018744656.1	700439	717379	+	LOC110701709	--	--	uncharacterized protein LOC110701709 [Chenopodium quinoa]	--	--	--	--	--
gene-LOC110701776	0.36	0.42	0.47	3.07	3.27	2.02	7	8	8	55	66	35	0.145	-2.789	1.7815e-07	1.78846e-05	down	NW_018744662.1	145054	150078	+	LOC110701776	--	K03106 signal recognition particle subunit SRP54 [EC:3.6.5.4] | (RefSeq) signal recognition particle 54 kDa protein, chloroplastic-like (A)	signal recognition particle 54 kDa protein, chloroplastic-like [Chenopodium quinoa]	RecName: Full=Signal recognition particle 54 kDa protein, chloroplastic; Short=54 chloroplast protein; Short=54CP; Short=SRP54; Short=cpSRP54; AltName: Full=FFC; Flags: Precursor;	SubName: Full=Uncharacterized protein {ECO:0000313|EMBL:KNA09706.1};	Signal recognition particle, subunit Srp54	GO:0009507,chloroplast; GO:0009570,chloroplast stroma; GO:0043234,NA; GO:0080085,signal recognition particle, chloroplast targeting; GO:0005786,signal recognition particle, endoplasmic reticulum targeting; GO:0008312,7S RNA binding; GO:0005525,GTP binding; GO:0003924,GTPase activity; GO:0019904,protein domain specific binding; GO:0070208,protein heterotrimerization; GO:0006614,SRP-dependent cotra…	SRP54-type protein, GTPase domain
gene-LOC110701786	2.85	3.67	3.85	9.17	6.21	6.02	96	121	114	287	219	182	0.471	-1.086	1.39588e-05	0.000864964	down	NW_018744662.1	513529	519296	+	LOC110701786	--	--	--	--	--	--	--	--
gene-LOC110701822	0.72	0	0.38	0.54	4.14	13.24	13	0	6	9	78	214	0.06	-4.055	0.000673331	0.019206	down	NW_018744662.1	3274580	3277145	+	LOC110701822	--	K01285 lysosomal Pro-X carboxypeptidase [EC:3.4.16.2] | (RefSeq) LOW QUALITY PROTEIN: lysosomal Pro-X carboxypeptidase-like (A)	LOW QUALITY PROTEIN: lysosomal Pro-X carboxypeptidase-like [Chenopodium quinoa]	--	SubName: Full=Uncharacterized protein {ECO:0000313|EMBL:EYU36116.1};	Prolylcarboxypeptidase (angiotensinase C)	GO:0008236,serine-type peptidase activity	Serine carboxypeptidase S28
gene-LOC110701884	3.17	3.28	3.1	10.39	9.13	9.17	241	244	208	736	728	627	0.323	-1.632	6.37734e-19	3.95175e-16	down	NW_018744662.1	409306	427601	-	LOC110701884	--	K01872 alanyl-tRNA synthetase [EC:6.1.1.7] | (RefSeq) alanine--tRNA ligase-like (A)	alanine--tRNA ligase-like [Chenopodium quinoa]	RecName: Full=Alanine--tRNA ligase {ECO:0000255|HAMAP-Rule:MF_03133}; EC=6.1.1.7 {ECO:0000255|HAMAP-Rule:MF_03133}; AltName: Full=Alanyl-tRNA synthetase {ECO:0000255|HAMAP-Rule:MF_03133}; Short=AlaRS {ECO:0000255|HAMAP-Rule:MF_03133}; Flags: Precursor;	RecName: Full=Alanine--tRNA ligase {ECO:0000256|HAMAP-Rule:MF_03133}; EC=6.1.1.7 {ECO:0000256|HAMAP-Rule:MF_03133}; AltName: Full=Alanyl-tRNA synthetase {ECO:0000256|HAMAP-Rule:MF_03133}; Short=AlaRS {ECO:0000256|HAMAP-Rule:MF_03133};	Alanyl-tRNA synthetase	GO:0009507,chloroplast; GO:0005829,cytosol; GO:0005739,mitochondrion; GO:0004813,alanine-tRNA ligase activity; GO:0016597,amino acid binding; GO:0005524,ATP binding; GO:0046872,metal ion binding; GO:0000049,tRNA binding; GO:0006419,alanyl-tRNA aminoacylation; GO:0046686,response to cadmium ion; GO:0006400,tRNA modification	tRNA synthetases class II (A)
gene-LOC110701899	0	0	0	0.65	0.7	0.41	0	0	0	43	52	26	0.004	-7.799	4.72826e-09	6.79734e-07	down	NW_018744662.1	747716	751867	+	LOC110701899	--	K17604 zinc finger SWIM domain-containing protein 3 | (RefSeq) protein FAR-RED IMPAIRED RESPONSE 1-like isoform X1 (A)	protein FAR-RED IMPAIRED RESPONSE 1-like [Chenopodium quinoa]	RecName: Full=Protein FAR-RED IMPAIRED RESPONSE 1;	SubName: Full=Uncharacterized protein {ECO:0000313|EMBL:EMJ00283.1}; Flags: Fragment;	--	GO:0005634,nucleus; GO:0003700,DNA-binding transcription factor activity; GO:0008270,zinc ion binding; GO:0010018,far-red light signaling pathway; GO:0042753,positive regulation of circadian rhythm; GO:0045893,positive regulation of transcription, DNA-templated; GO:0010017,red or far-red light signaling pathway; GO:0009585,red, far-red light phototransduction; GO:0010218,response to far red light…	MULE transposase domain
gene-LOC110701929	0.93	1.64	2.28	3.32	3.09	3.82	37	64	80	123	129	137	0.449	-1.155	0.00257203	0.0490391	down	NW_018744662.1	1224583	1241146	+	LOC110701929	--	--	protein ENHANCED DOWNY MILDEW 2-like isoform X1 [Chenopodium quinoa]	RecName: Full=Protein ENHANCED DOWNY MILDEW 2 {ECO:0000303|PubMed:23940361};	SubName: Full=Uncharacterized protein {ECO:0000313|EMBL:KNA24543.1};	--	GO:0005634,nucleus; GO:0003700,DNA-binding transcription factor activity; GO:0046872,metal ion binding; GO:0043565,sequence-specific DNA binding; GO:0016569,covalent chromatin modification; GO:0050832,defense response to fungus; GO:0070829,heterochromatin maintenance; GO:0090436,leaf pavement cell development; GO:0031937,positive regulation of chromatin silencing; GO:0009911,positive regulation o…	Cytosine specific DNA methyltransferase replication foci domain
gene-LOC110701943	1.97	1.75	2.43	3.93	5.12	5.34	131	114	142	243	357	319	0.409	-1.289	3.93862e-05	0.00210057	down	NW_018744662.1	1434540	1443424	-	LOC110701943	--	K22685 DNA-dependent metalloprotease WSS1 [EC:3.4.24.-] | (RefSeq) LOC109734639; DNA-dependent metalloprotease WSS1 (A)	uncharacterized protein LOC110701943 isoform X1 [Chenopodium quinoa]	--	SubName: Full=Uncharacterized protein {ECO:0000313|EMBL:KNA13546.1};	Protein involved in sister chromatid separation and/or segregation	--	WLM domain
gene-LOC110701950	16.91	11.1	8.9	22.83	25.92	38.96	809	520	375	1017	1301	1676	0.409	-1.289	0.000975795	0.0251759	down	NW_018744662.1	1556386	1560868	+	LOC110701950	--	--	uncharacterized protein ycf45-like [Chenopodium quinoa]	RecName: Full=Uncharacterized protein ycf45; AltName: Full=ORF565;	SubName: Full=Uncharacterized protein {ECO:0000313|EMBL:KNA20588.1};	--	GO:0009507,chloroplast; GO:0005524,ATP binding; GO:0003676,nucleic acid binding	AAA domain
gene-LOC110701956	1.6	0.74	0.79	5.46	2.6	3.1	55	25	24	175	94	96	0.285	-1.809	0.000224363	0.00838213	down	NW_018744662.1	1661162	1666293	+	LOC110701956	--	K18045 tyrosine-protein phosphatase SIW14 [EC:3.1.3.48] | (RefSeq) probable tyrosine-protein phosphatase At1g05000 isoform X1 (A)	probable tyrosine-protein phosphatase At1g05000 isoform X1 [Chenopodium quinoa]	RecName: Full=Tyrosine-protein phosphatase DSP1 {ECO:0000305}; EC=3.1.3.48 {ECO:0000255|PROSITE-ProRule:PRU10044, ECO:0000269|PubMed:18433060, ECO:0000269|PubMed:21409566}; AltName: Full=Protein PLANT AND FUNGI ATYPICAL DUAL-SPECIFICITY PHOSPHATASE 1 {ECO:0000303|PubMed:21409566}; Short=AtPFA-DSP1 {ECO:0000303|PubMed:21409566}; AltName: Full=Tyrosine-protein phosphatase At1g05000 {ECO:0000305};	SubName: Full=Uncharacterized protein {ECO:0000313|EMBL:KNA15366.1};	Predicted protein tyrosine phosphatase	GO:0005737,cytoplasm; GO:0016791,phosphatase activity; GO:0004725,protein tyrosine phosphatase activity	Tyrosine phosphatase family
gene-LOC110701957	201.3	186.84	129.6	402.99	362.2	305.27	5522	5019	3132	10292	10420	7528	0.473	-1.081	2.87002e-05	0.0015992	down	NW_018744662.1	1676963	1678946	-	LOC110701957	--	K05933 aminocyclopropanecarboxylate oxidase [EC:1.14.17.4] | (RefSeq) 1-aminocyclopropane-1-carboxylate oxidase 4-like (A)	1-aminocyclopropane-1-carboxylate oxidase 4-like [Chenopodium quinoa]	RecName: Full=1-aminocyclopropane-1-carboxylate oxidase 4; Short=ACC oxidase 4; EC=1.14.17.4; AltName: Full=Ethylene-forming enzyme; Short=EFE;	SubName: Full=Uncharacterized protein {ECO:0000313|EMBL:KNA06323.1};	Iron/ascorbate family oxidoreductases	GO:0009815,1-aminocyclopropane-1-carboxylate oxidase activity; GO:0031418,L-ascorbic acid binding; GO:0046872,metal ion binding; GO:0009693,ethylene biosynthetic process	2OG-Fe(II) oxygenase superfamily
gene-LOC110701981	5.66	9.37	15.05	4.66	2.6	3.67	158	256	370	121	76	92	2.66	1.411	0.000399966	0.0130799	up	NW_018744662.1	1996100	2002237	-	LOC110701981	--	K02935 large subunit ribosomal protein L7/L12 | (RefSeq) uncharacterized protein LOC110701981 (A)	uncharacterized protein LOC110701981 [Chenopodium quinoa]	RecName: Full=50S ribosomal protein L12, chloroplastic {ECO:0000255|HAMAP-Rule:MF_00368};	SubName: Full=Uncharacterized protein {ECO:0000313|EMBL:KNA20623.1};	Mitochondrial/chloroplast ribosomal protein L12	GO:0009507,chloroplast; GO:0005840,ribosome; GO:0003735,structural constituent of ribosome; GO:0006412,translation	Ribosomal protein L7/L12 C-terminal domain
gene-LOC110701983	9.6	14.19	23.04	9.25	4.5	5.14	513	742	1084	460	252	247	2.425	1.278	0.00061949	0.0181012	up	NW_018744662.1	2033619	2040232	+	LOC110701983	--	K16911 ATP-dependent RNA helicase DDX21 [EC:3.6.4.13] | (RefSeq) DEAD-box ATP-dependent RNA helicase 53-like (A)	DEAD-box ATP-dependent RNA helicase 53-like [Chenopodium quinoa]	RecName: Full=DEAD-box ATP-dependent RNA helicase 53, mitochondrial; EC=3.6.4.13; Flags: Precursor;	SubName: Full=Uncharacterized protein {ECO:0000313|EMBL:KNA14208.1};	ATP-dependent RNA helicase	GO:0005618,cell wall; GO:0005739,mitochondrion; GO:0005730,nucleolus; GO:0043234,NA; GO:0005524,ATP binding; GO:0004004,ATP-dependent RNA helicase activity; GO:0003723,RNA binding; GO:0000373,Group II intron splicing; GO:0009409,response to cold; GO:0010501,RNA secondary structure unwinding	DEAD/DEAH box helicase
gene-LOC110702002	0.21	0.64	0.15	0.02	0	0	11	33	7	1	0	0	43.797	5.453	0.000444191	0.0142157	up	NW_018744662.1	2210458	2215879	-	LOC110702002	--	--	--	--	--	--	--	--
gene-LOC110702014	0.12	0.12	0.02	0.37	0.47	1.05	7	7	1	20	29	55	0.133	-2.911	0.000486869	0.0152422	down	NW_018744662.1	2396547	2400455	-	LOC110702014	--	K20606 mitogen-activated protein kinase kinase kinase ANP1 [EC:2.7.11.25] | (RefSeq) receptor-like serine/threonine-protein kinase SD1-7 isoform X1 (A)	G-type lectin S-receptor-like serine/threonine-protein kinase At4g27290 isoform X1 [Chenopodium quinoa]	RecName: Full=G-type lectin S-receptor-like serine/threonine-protein kinase At4g27290; EC=2.7.11.1; Flags: Precursor;	SubName: Full=Uncharacterized protein {ECO:0000313|EMBL:CCB46447.1};	--	GO:0005886,plasma membrane; GO:0005524,ATP binding; GO:0005516,calmodulin binding; GO:0030246,carbohydrate binding; GO:0004674,protein serine/threonine kinase activity; GO:0006468,protein phosphorylation; GO:0048544,recognition of pollen	Protein tyrosine kinase
gene-LOC110702047	3.76	8.35	12.87	4.48	1.5	1.48	127	276	383	141	53	45	3.301	1.723	0.00131585	0.0311744	up	NW_018744662.1	2723506	2726469	+	LOC110702047	--	--	large ribosomal RNA subunit accumulation protein YCED homolog 1, chloroplastic-like [Chenopodium quinoa]	RecName: Full=Large ribosomal RNA subunit accumulation protein YCED homolog 1, chloroplastic {ECO:0000305}; AltName: Full=23S rRNA accumulation protein YCED {ECO:0000250|UniProtKB:P0AB28}; AltName: Full=Protein DUF177A {ECO:0000303|PubMed:27574185}; Flags: Precursor;	SubName: Full=Uncharacterized protein {ECO:0000313|EMBL:KNA18209.1};	--	GO:0009507,chloroplast; GO:0042644,chloroplast nucleoid; GO:0042254,ribosome biogenesis	Large ribosomal RNA subunit accumulation protein YceD
gene-LOC110702048	14.89	9.91	9.47	16.15	32.73	28.95	405	264	227	409	934	708	0.423	-1.242	0.00263951	0.0499381	down	NW_018744662.1	2729613	2732234	-	LOC110702048	--	K05605 3-hydroxyisobutyryl-CoA hydrolase [EC:3.1.2.4] | (RefSeq) 3-hydroxyisobutyryl-CoA hydrolase-like protein 3, mitochondrial (A)	probable strigolactone esterase DAD2 [Chenopodium quinoa]	RecName: Full=Strigolactone esterase RMS3 {ECO:0000305}; EC=3.1.-.- {ECO:0000305}; AltName: Full=Protein DWARF 14 homolog {ECO:0000305}; Short=PsD14 {ECO:0000303|PubMed:27479744}; AltName: Full=Protein RAMOSUS 3 {ECO:0000303|PubMed:27479744};	SubName: Full=Uncharacterized protein {ECO:0000313|EMBL:KNA17451.1};	--	GO:0005737,cytoplasm; GO:0005634,nucleus; GO:0016787,hydrolase activity; GO:1901601,strigolactone biosynthetic process	Alpha/beta hydrolase family
gene-LOC110702069	26.33	64	78.22	27.32	10.92	9.57	1200	2856	3140	1159	522	392	3.454	1.788	8.2535e-05	0.00379451	up	NW_018744662.1	3081545	3087217	-	LOC110702069	--	K11294 nucleolin | (RefSeq) nucleolin 1-like (A)	nucleolin 1-like [Chenopodium quinoa]	RecName: Full=Nucleolin 2; AltName: Full=Protein NUCLEOLIN LIKE 2;	SubName: Full=Uncharacterized protein {ECO:0000313|EMBL:KNA22717.1};	Nuclear localization sequence binding protein	GO:0005730,nucleolus; GO:0003723,RNA binding; GO:0006364,rRNA processing	RNA recognition motif. (a.k.a. RRM, RBD, or RNP domain)
gene-LOC110702086	5.87	4.81	7.97	13.9	13.42	18.5	238	191	285	525	571	675	0.393	-1.349	2.06707e-05	0.0012239	down	NW_018744662.1	3292432	3298990	+	LOC110702086	--	K16297 serine carboxypeptidase-like clade II [EC:3.4.16.-] | (RefSeq) serine carboxypeptidase-like 34 (A)	serine carboxypeptidase-like 34 [Chenopodium quinoa]	RecName: Full=Serine carboxypeptidase-like 34; EC=3.4.16.-; Flags: Precursor;	RecName: Full=Carboxypeptidase {ECO:0000256|RuleBase:RU361156}; EC=3.4.16.- {ECO:0000256|RuleBase:RU361156}; Flags: Fragment;	Serine carboxypeptidases (lysosomal cathepsin A)	GO:0005576,extracellular region; GO:0009505,plant-type cell wall; GO:0005773,vacuole; GO:0004185,serine-type carboxypeptidase activity; GO:0051603,proteolysis involved in cellular protein catabolic process	Serine carboxypeptidase
gene-LOC110702111	16.12	10.67	9.55	19.88	37.52	33.02	1533	994	800	1760	3742	2823	0.387	-1.369	0.000526135	0.0161894	down	NW_018744662.1	3680424	3695387	+	LOC110702111	--	K10357 myosin V | (RefSeq) myosin-1-like isoform X1 (A)	myosin-1-like [Chenopodium quinoa]	RecName: Full=Myosin-1; AltName: Full=AtATM1;	SubName: Full=Uncharacterized protein {ECO:0000313|EMBL:KNA14621.1};	Myosin class V heavy chain	GO:0005783,endoplasmic reticulum; GO:0005768,endosome; GO:0016459,myosin complex; GO:0009524,phragmoplast; GO:0009506,plasmodesma; GO:0003779,actin binding; GO:0005524,ATP binding; GO:0005516,calmodulin binding; GO:0003774,motor activity; GO:0006897,endocytosis	Myosin head (motor domain)
gene-LOC110702115	11.87	12.7	5.88	30.11	16.53	19.83	729	764	318	1722	1065	1095	0.452	-1.146	0.00120051	0.0292914	down	NW_018744662.1	3717298	3722024	+	LOC110702115	--	--	transmembrane protein 53-A-like [Chenopodium quinoa]	--	SubName: Full=Uncharacterized protein {ECO:0000313|EMBL:KNA14614.1};	Uncharacterized conserved protein	--	Eukaryotic protein of unknown function (DUF829)
gene-LOC110702160	0.02	0.07	0.21	0.09	1.87	0.63	2	7	18	8	192	55	0.104	-3.265	0.00204795	0.0420591	down	NW_018744669.1	9213	17198	+	LOC110702160	--	K06883 uncharacterized protein | (RefSeq) LOW QUALITY PROTEIN: uncharacterized protein LOC104799061 (A)	cysteine-rich receptor-like protein kinase 10 isoform X1 [Chenopodium quinoa]	RecName: Full=Cysteine-rich receptor-like protein kinase 26; Short=Cysteine-rich RLK26; EC=2.7.11.-; Flags: Precursor;	SubName: Full=Uncharacterized protein {ECO:0000313|EMBL:ESR62360.1};	--	GO:0016021,integral component of membrane; GO:0005886,plasma membrane; GO:0005524,ATP binding; GO:0004674,protein serine/threonine kinase activity; GO:0042742,defense response to bacterium; GO:0006468,protein phosphorylation	Protein kinase domain
gene-LOC110702194	8.98	10.83	10.76	6.39	3.18	3.59	320	378	338	212	119	115	2.284	1.192	2.06352e-05	0.00122381	up	NW_018744676.1	257863	259611	-	LOC110702194	--	K15283 solute carrier family 35, member E1 | (RefSeq) xylulose 5-phosphate/phosphate translocator, chloroplastic-like (A)	xylulose 5-phosphate/phosphate translocator, chloroplastic-like [Chenopodium quinoa]	RecName: Full=Xylulose 5-phosphate/phosphate translocator, chloroplastic; Short=Xul-5-P/phosphate translocator; Flags: Precursor;	SubName: Full=Uncharacterized protein {ECO:0000313|EMBL:KNA08568.1};	Glucose-6-phosphate/phosphate and phosphoenolpyruvate/phosphate antiporter	GO:0009941,chloroplast envelope; GO:0031969,chloroplast membrane; GO:0016021,integral component of membrane; GO:0009536,plastid; GO:0015120,phosphoglycerate transmembrane transporter activity; GO:0071917,triose-phosphate transmembrane transporter activity; GO:0015713,phosphoglycerate transmembrane transport; GO:0035436,triose phosphate transmembrane transport	Triose-phosphate Transporter family
gene-LOC110702209	0	0	0	0.61	3.16	1.05	0	0	0	6	35	10	0.011	-6.568	7.69083e-05	0.00358042	down	NW_018744676.1	370050	370896	+	LOC110702209	--	--	abscisic stress-ripening protein 3-like [Chenopodium quinoa]	--	SubName: Full=Uncharacterized protein {ECO:0000313|EMBL:KNA13463.1};	--	GO:0006950,response to stress	ABA/WDS induced protein
gene-LOC110702219	0	0	0.04	0.03	8.24	11.21	0	0	1	1	278	324	0.002	-9.248	0.000113069	0.00479776	down	NW_018744676.1	514449	520097	+	LOC110702219	--	K08241 jasmonate O-methyltransferase [EC:2.1.1.141] | (RefSeq) jasmonate O-methyltransferase-like (A)	jasmonate O-methyltransferase-like [Chenopodium quinoa]	RecName: Full=Jasmonate O-methyltransferase; EC=2.1.1.141; AltName: Full=S-adenosyl-L-methionine:jasmonic acid carboxyl methyltransferase;	SubName: Full=Uncharacterized protein {ECO:0000313|EMBL:KNA23979.1};	--	GO:0005737,cytoplasm; GO:0005634,nucleus; GO:0030795,jasmonate O-methyltransferase activity; GO:0102078,methyl jasmonate methylesterase activity; GO:0009694,jasmonic acid metabolic process; GO:0031408,oxylipin biosynthetic process; GO:0009611,response to wounding	SAM dependent carboxyl methyltransferase
gene-LOC110702261	0	0	0	0.27	0.83	1.45	0	0	0	7	24	36	0.008	-7.027	7.52605e-06	0.00050183	down	NW_018742393.1	392294	394078	+	LOC110702261	--	K12472 epidermal growth factor receptor substrate 15 | (RefSeq) GATA zinc finger domain-containing protein 14-like (A)	BURP domain-containing protein 3-like [Chenopodium quinoa]	RecName: Full=BURP domain-containing protein 3; Short=OsBURP03; Flags: Precursor;	SubName: Full=Uncharacterized protein {ECO:0000313|EMBL:OAY54329.1};	--	--	BURP domain
gene-LOC110702301	38.42	24.76	29.8	76.9	64.45	123.38	1209	763	826	2253	2127	3490	0.343	-1.545	2.22711e-05	0.00130386	down	NW_018742393.1	452129	455506	+	LOC110702301	--	K12472 epidermal growth factor receptor substrate 15 | (RefSeq) GATA zinc finger domain-containing protein 14-like (A)	BURP domain protein RD22-like [Chenopodium quinoa]	RecName: Full=BURP domain protein RD22 {ECO:0000303|PubMed:9790599}; AltName: Full=Dehydration-responsive protein RD22 {ECO:0000303|PubMed:8479424}; Flags: Precursor;	SubName: Full=Uncharacterized protein {ECO:0000313|EMBL:KNA12476.1};	--	GO:0005768,endosome; GO:0005794,Golgi apparatus; GO:0005802,trans-Golgi network; GO:0009651,response to salt stress	BURP domain
gene-LOC110702468	40.96	44.6	81.95	28.03	24.21	19.39	813	867	1433	518	504	346	2.265	1.18	0.000264672	0.009529	up	NW_018744693.1	910318	913448	-	LOC110702468	--	--	remorin-like [Chenopodium quinoa]	RecName: Full=Remorin; AltName: Full=DNA-binding protein;	SubName: Full=Uncharacterized protein {ECO:0000313|EMBL:KNA19891.1};	--	GO:0005886,plasma membrane	Remorin, C-terminal region
gene-LOC110702506	1.05	0.08	0.22	2.08	2.92	3.75	27	2	5	50	79	87	0.157	-2.675	0.00181091	0.0388562	down	NW_018744693.1	1577065	1578329	+	LOC110702506	--	K09286 EREBP-like factor | (RefSeq) dehydration-responsive element-binding protein 1A-like (A)	dehydration-responsive element-binding protein 1D-like [Chenopodium quinoa]	RecName: Full=Dehydration-responsive element-binding protein 1D; Short=Protein DREB1D; AltName: Full=C-repeat/dehydration-responsive element-binding factor 4; Short=C-repeat-binding factor 4; Short=CRT/DRE-binding factor 4;	SubName: Full=Uncharacterized protein {ECO:0000313|EMBL:KNA18274.1};	--	GO:0005634,nucleus; GO:0003700,DNA-binding transcription factor activity; GO:0043565,sequence-specific DNA binding; GO:0009738,abscisic acid-activated signaling pathway; GO:0019760,glucosinolate metabolic process; GO:0006351,transcription, DNA-templated	AP2 domain
gene-LOC110702653	0.82	1.45	0.91	2.97	3.07	1.44	60	104	59	203	236	95	0.406	-1.299	0.00091323	0.0239991	down	NW_018744693.1	5239682	5251346	-	LOC110702653	--	--	--	--	--	--	--	--
gene-LOC110702661	4.96	4.39	4.46	1.54	1.71	2.3	163	141	129	47	59	68	2.399	1.262	0.000241742	0.00884747	up	NW_018744693.1	5614028	5615638	+	LOC110702661	--	K11805 WD repeat-containing protein 68 | (RefSeq) WD repeat-containing protein LWD1 (A)	WD repeat-containing protein LWD1 [Chenopodium quinoa]	RecName: Full=WD repeat-containing protein LWD1; AltName: Full=Protein ANTHOCYANIN 11-A; Short=AtAN11-A; AltName: Full=Protein LIGHT-REGULATED WD1; AltName: Full=WD repeat-containing protein AN11-A;	SubName: Full=Uncharacterized protein {ECO:0000313|EMBL:KNA03141.1};	Conserved WD40 repeat-containing protein AN11	GO:0005634,nucleus; GO:0044212,transcription regulatory region DNA binding; GO:0009718,anthocyanin-containing compound biosynthetic process; GO:0043153,entrainment of circadian clock by photoperiod; GO:0048573,photoperiodism, flowering; GO:0048511,rhythmic process	WD domain, G-beta repeat
gene-LOC110702789	1.17	1.36	1.01	1.88	2.08	4.69	91	103	69	136	169	327	0.388	-1.367	0.00261331	0.0495436	down	NW_018744702.1	1970646	1981463	+	LOC110702789	--	--	--	--	--	--	--	--
gene-LOC110702821	0	0.03	0.03	2.29	0.81	0.39	0	1	1	73	29	12	0.018	-5.822	8.51617e-06	0.000557506	down	NW_018744704.1	434918	438180	-	LOC110702821	--	K14209 solute carrier family 36 (proton-coupled amino acid transporter) | (RefSeq) amino acid transporter ANT1-like (A)	lysine histidine transporter-like 2 [Chenopodium quinoa]	RecName: Full=Lysine histidine transporter 1;	SubName: Full=Uncharacterized protein {ECO:0000313|EMBL:KNA08927.1};	Amino acid transporters	GO:0016021,integral component of membrane; GO:0005886,plasma membrane; GO:0015171,amino acid transmembrane transporter activity; GO:0015293,symporter activity; GO:0043090,amino acid import; GO:0080167,response to karrikin	Transmembrane amino acid transporter protein
gene-LOC110702833	0.04	0.02	0.02	0.32	0.19	0.83	2	1	1	15	10	37	0.06	-4.048	0.000298865	0.010378	down	NW_018744704.1	5126063	5129650	+	LOC110702833	--	--	uncharacterized protein LOC110702833 [Chenopodium quinoa]	--	SubName: Full=Uncharacterized protein {ECO:0000313|EMBL:KMS99435.1};	--	--	Proliferating cell nuclear antigen, N-terminal domain
gene-LOC110702857	0.04	0.06	0	2.48	0.79	0.83	2	3	0	111	40	36	0.026	-5.248	1.04781e-08	1.35461e-06	down	NW_018744704.1	71994	75036	+	LOC110702857	--	K20222 importin-5 | (RefSeq) importin-5-like (A)	uncharacterized protein LOC110702857 [Chenopodium quinoa]	--	SubName: Full=Uncharacterized protein {ECO:0000313|EMBL:CDP17582.1};	Karyopherin (importin) beta 3	--	--
gene-LOC110702867	1.47	2.24	2.49	0	0	0	49	73	73	0	0	0	342.098	8.418	4.57249e-11	9.61025e-09	up	NW_018744704.1	769339	773746	-	LOC110702867	--	K17499 protein phosphatase 1G [EC:3.1.3.16] | (RefSeq) probable protein phosphatase 2C 11 isoform X1 (A)	probable protein phosphatase 2C 11 isoform X1 [Chenopodium quinoa]	RecName: Full=Probable protein phosphatase 2C 11; Short=OsPP2C11; EC=3.1.3.16;	SubName: Full=Uncharacterized protein {ECO:0000313|EMBL:KNA10479.1};	Serine/threonine protein phosphatase	GO:0046872,metal ion binding; GO:0004722,protein serine/threonine phosphatase activity	Protein phosphatase 2C
gene-LOC110702879	0.7	0.87	0.75	1.4	1.52	1.95	62	75	58	115	141	155	0.453	-1.141	0.000332916	0.0114061	down	NW_018744704.1	1324998	1342836	-	LOC110702879	--	K10260 F-box and WD-40 domain protein 7 | (RefSeq) hypothetical protein (A)	DENN domain and WD repeat-containing protein SCD1-like isoform X2 [Chenopodium quinoa]	RecName: Full=DENN domain and WD repeat-containing protein SCD1 {ECO:0000305}; AltName: Full=Protein STOMATAL CYTOKINESIS DEFECTIVE 1 {ECO:0000303|PubMed:12874123};	SubName: Full=Uncharacterized protein {ECO:0000313|EMBL:KNA06176.1};	Calmodulin-binding protein CRAG, contains DENN domain	GO:0030136,clathrin-coated vesicle; GO:0080008,Cul4-RING E3 ubiquitin ligase complex; GO:0005886,plasma membrane; GO:0000911,cytokinesis by cell plate formation; GO:0010235,guard mother cell cytokinesis; GO:0009825,multidimensional cell growth; GO:0045824,negative regulation of innate immune response; GO:0040008,regulation of growth	DENN (AEX-3) domain
gene-LOC110702926	24.02	14.1	12.7	53.8	38.39	45.67	917	527	427	1912	1537	1567	0.367	-1.444	2.70098e-05	0.00151792	down	NW_018744704.1	4104936	4110956	+	LOC110702926	--	K21989 calcium permeable stress-gated cation channel | (RefSeq) CSC1-like protein RXW8 (A)	protein SAR DEFICIENT 1-like [Chenopodium quinoa]	RecName: Full=Protein SAR DEFICIENT 1 {ECO:0000303|PubMed:20921422};	SubName: Full=Uncharacterized protein {ECO:0000313|EMBL:KNA20947.1};	--	GO:0005634,nucleus; GO:0003700,DNA-binding transcription factor activity; GO:0043565,sequence-specific DNA binding; GO:0071219,cellular response to molecule of bacterial origin; GO:0042742,defense response to bacterium; GO:0002229,defense response to oomycetes; GO:0009626,plant-type hypersensitive response; GO:1900426,positive regulation of defense response to bacterium; GO:0080142,regulation of …	Calmodulin binding protein-like
gene-LOC110702937	0	0	0	2.44	1.63	1.6	0	0	0	49	37	31	0.005	-7.755	3.89529e-09	5.69092e-07	down	NW_018744704.1	4363490	4365392	+	LOC110702937	--	--	--	--	--	--	--	--
gene-LOC110702939	3.78	6.57	5.37	2.83	0.72	0.89	171	291	214	119	34	36	3.54	1.824	0.000195996	0.0074778	up	NW_018742393.1	1139416	1146536	-	LOC110702939	--	K16297 serine carboxypeptidase-like clade II [EC:3.4.16.-] | (RefSeq) serine carboxypeptidase-like 40 (A)	serine carboxypeptidase-like 40 [Chenopodium quinoa]	RecName: Full=Serine carboxypeptidase-like 40; EC=3.4.16.-; Flags: Precursor;	RecName: Full=Carboxypeptidase {ECO:0000256|RuleBase:RU361156}; EC=3.4.16.- {ECO:0000256|RuleBase:RU361156};	Serine carboxypeptidases (lysosomal cathepsin A)	GO:0005576,extracellular region; GO:0004185,serine-type carboxypeptidase activity; GO:0051603,proteolysis involved in cellular protein catabolic process	Serine carboxypeptidase
gene-LOC110702941	0.3	0.2	0.13	0.35	1.37	1.4	23	15	9	25	110	97	0.192	-2.38	0.000624791	0.0181919	down	NW_018744704.1	4558460	4576585	+	LOC110702941	--	--	--	--	--	--	--	--
gene-LOC110702947	7.48	9.05	5.7	3.46	2.73	4.35	337	399	226	145	129	176	2.031	1.022	0.000884181	0.0234002	up	NW_018744704.1	4990907	5007861	-	LOC110702947	--	K02563 UDP-N-acetylglucosamine--N-acetylmuramyl-(pentapeptide) pyrophosphoryl-undecaprenol N-acetylglucosamine transferase [EC:2.4.1.227] | (RefSeq) uncharacterized protein LOC110702947 (A)	uncharacterized protein LOC110702947 [Chenopodium quinoa]	--	SubName: Full=Uncharacterized protein {ECO:0000313|EMBL:KNA19339.1};	--	GO:0016021,integral component of membrane; GO:0050511,undecaprenyldiphospho-muramoylpentapeptide beta-N-acetylglucosaminyltransferase activity; GO:0005975,carbohydrate metabolic process; GO:0030259,lipid glycosylation	Glycosyltransferase family 28 C-terminal domain
gene-LOC110702955	4.11	3.44	4.41	0.61	1.85	0.89	72	59	68	10	34	14	3.365	1.751	0.0017755	0.0383504	up	NW_018744704.1	5430622	5434171	-	LOC110702955	--	K03133 transcription initiation factor TFIID subunit 9B | (RefSeq) transcription initiation factor TFIID subunit 9-like (A)	transcription initiation factor TFIID subunit 9-like [Chenopodium quinoa]	RecName: Full=Transcription initiation factor TFIID subunit 9; AltName: Full=TATA binding protein associated factor 21kDa subunit; AltName: Full=TBP-associated factor 9; Short=AtTAF9;	SubName: Full=Uncharacterized protein {ECO:0000313|EMBL:KNA06924.1};	Transcription initiation factor TFIID, subunit TAF9 (also component of histone acetyltransferase SAGA)	GO:0000124,SAGA complex; GO:0005669,transcription factor TFIID complex; GO:0046982,protein heterodimerization activity; GO:0008134,transcription factor binding; GO:0044212,transcription regulatory region DNA binding; GO:0043966,histone H3 acetylation; GO:0045944,positive regulation of transcription by RNA polymerase II; GO:0051123,RNA polymerase II preinitiation complex assembly; GO:0006366,trans…	Transcription initiation factor IID, 31kD subunit
gene-LOC110703059	2.66	6.89	5.89	2.42	1.63	2.02	126	320	246	107	81	86	2.415	1.272	0.000519729	0.0160473	up	NW_018742393.1	1282656	1284981	+	LOC110703059	--	K17710 pentatricopeptide repeat domain-containing protein 1 | (RefSeq) putative pentatricopeptide repeat-containing protein At2g02150 (A)	pentatricopeptide repeat-containing protein At3g02490, mitochondrial-like [Chenopodium quinoa]	RecName: Full=Pentatricopeptide repeat-containing protein At3g02490, mitochondrial; Flags: Precursor;	SubName: Full=Uncharacterized protein {ECO:0000313|EMBL:KNA23808.1};	FOG: PPR repeat	GO:0005739,mitochondrion; GO:0004519,endonuclease activity; GO:0003723,RNA binding; GO:0009451,RNA modification; GO:0008380,RNA splicing	PPR repeat family
gene-LOC110703096	22.94	19.73	12.21	32.54	52.78	50.11	964	812	452	1273	2326	1893	0.389	-1.364	0.000255837	0.009241	down	NW_018742393.1	1331395	1334219	+	LOC110703096	--	K12135 zinc finger protein CONSTANS | (RefSeq) zinc finger protein CONSTANS-LIKE 2-like (A)	zinc finger protein CONSTANS-LIKE 2-like isoform X1 [Chenopodium quinoa]	RecName: Full=Zinc finger protein CONSTANS-LIKE 2;	SubName: Full=CONSTANS-like protein 1 {ECO:0000313|EMBL:ACB36911.2};	GATA-4/5/6 transcription factors	GO:0005634,nucleus; GO:0003677,DNA binding; GO:0003700,DNA-binding transcription factor activity; GO:0008270,zinc ion binding; GO:0009658,chloroplast organization; GO:0009909,regulation of flower development; GO:0009416,response to light stimulus; GO:0006351,transcription, DNA-templated	CCT motif
gene-LOC110703267	8.61	8.84	7.46	13.99	14.39	22.5	367	369	280	555	643	862	0.469	-1.092	0.000354885	0.0119202	down	NW_018744718.1	1227744	1231071	+	LOC110703267	--	--	uncharacterized protein LOC110703267 [Chenopodium quinoa]	--	SubName: Full=Uncharacterized protein {ECO:0000313|EMBL:KNA24824.1};	--	GO:0036361,racemase activity, acting on amino acids and derivatives; GO:0006520,cellular amino acid metabolic process	Asp/Glu/Hydantoin racemase
gene-LOC110703280	1.75	2.32	3.49	0.93	0.58	0.52	117	152	206	58	41	31	3.622	1.857	1.24459e-06	0.000105497	up	NW_018744718.1	1336655	1343505	-	LOC110703280	--	K14558 periodic tryptophan protein 2 | (RefSeq) LOW QUALITY PROTEIN: periodic tryptophan protein 2-like (A)	LOW QUALITY PROTEIN: periodic tryptophan protein 2-like [Chenopodium quinoa]	RecName: Full=Periodic tryptophan protein 2 {ECO:0000303|PubMed:19929880}; Short=AtPWP2 {ECO:0000303|PubMed:19929880};	SubName: Full=Uncharacterized protein {ECO:0000313|EMBL:KNA23292.1};	WD40-repeat-containing subunit of the 18S rRNA processing complex	GO:0080008,Cul4-RING E3 ubiquitin ligase complex; GO:0005730,nucleolus; GO:0005634,nucleus; GO:0034388,Pwp2p-containing subcomplex of 90S preribosome; GO:0032040,small-subunit processome; GO:0030515,snoRNA binding; GO:0009553,embryo sac development; GO:0000462,maturation of SSU-rRNA from tricistronic rRNA transcript (SSU-rRNA, 5.8S rRNA, LSU-rRNA); GO:0010119,regulation of stomatal movement; GO:0…	WD domain, G-beta repeat
gene-LOC110703288	3.32	2.08	3.18	1.11	1.43	1.11	274	168	231	85	124	82	2.289	1.195	0.000964316	0.0249335	up	NW_018742393.1	1575675	1586406	-	LOC110703288	--	K10908 DNA-directed RNA polymerase, mitochondrial [EC:2.7.7.6] | (RefSeq) DNA-directed RNA polymerase 2, chloroplastic/mitochondrial-like (A)	DNA-directed RNA polymerase 2, chloroplastic/mitochondrial-like [Chenopodium quinoa]	RecName: Full=DNA-directed RNA polymerase 2, chloroplastic/mitochondrial; EC=2.7.7.6; AltName: Full=NsRpoT-B; AltName: Full=T7 bacteriophage-type single subunit RNA polymerase 2; Flags: Precursor;	RecName: Full=DNA-directed RNA polymerase {ECO:0000256|RuleBase:RU003805}; EC=2.7.7.6 {ECO:0000256|RuleBase:RU003805};	Mitochondrial/chloroplast DNA-directed RNA polymerase RPO41, provides primers for DNA replication-initiation	GO:0009507,chloroplast; GO:0005739,mitochondrion; GO:0009536,plastid; GO:0003677,DNA binding; GO:0003899,DNA-directed 5'-3' RNA polymerase activity; GO:0006351,transcription, DNA-templated	DNA-dependent RNA polymerase
gene-LOC110703292	8.67	3.28	7.42	12.99	32.94	36.42	496	184	374	692	1976	1873	0.227	-2.141	5.82599e-05	0.00288014	down	NW_018744718.1	1493343	1499015	-	LOC110703292	--	K06573 solute carrier family 4 (anion exchanger), member 1 | (RefSeq) AE family transporter: anion exchange (A)	boron transporter 4-like [Chenopodium quinoa]	RecName: Full=Boron transporter 4;	SubName: Full=Uncharacterized protein {ECO:0000313|EMBL:KNA11377.1};	Na+-independent Cl/HCO3 exchanger AE1 and related transporters (SLC4 family)	GO:0005887,integral component of plasma membrane; GO:0005886,plasma membrane; GO:0015301,anion:anion antiporter activity; GO:0080139,borate efflux transmembrane transporter activity; GO:0005452,inorganic anion exchanger activity; GO:0046713,borate transport; GO:0080029,cellular response to boron-containing substance levels; GO:0051453,regulation of intracellular pH	HCO3- transporter family
gene-LOC110703303	38.37	37.57	56.76	27.53	18.32	17.23	1434	1375	1869	958	718	579	2.063	1.045	8.39309e-05	0.00384265	up	NW_018744718.1	1631032	1633460	+	LOC110703303	--	--	--	--	--	--	--	--
gene-LOC110703309	3.52	1.06	0.81	7.66	9.06	14.3	324	96	66	657	875	1184	0.174	-2.521	2.46514e-05	0.00140854	down	NW_018744718.1	1762263	1769404	+	LOC110703309	--	K08712 ATP-binding cassette, subfamily G (WHITE), member 2, SNQ2 | (RefSeq) ABC transporter, ATP-binding protein (A)	pleiotropic drug resistance protein 1-like [Chenopodium quinoa]	RecName: Full=Pleiotropic drug resistance protein 1; AltName: Full=NtPDR1;	SubName: Full=Uncharacterized protein {ECO:0000313|EMBL:KNA08458.1};	Pleiotropic drug resistance proteins (PDR1-15), ABC superfamily	GO:0016021,integral component of membrane; GO:0005524,ATP binding; GO:0016887,ATPase activity	ABC-2 type transporter
gene-LOC110703355	0.95	0.67	0.69	3.55	2.14	3	36	25	23	125	85	102	0.263	-1.924	7.85485e-07	6.97045e-05	down	NW_018744718.1	2393583	2396332	+	LOC110703355	--	K15109 solute carrier family 25 (mitochondrial carnitine/acylcarnitine transporter), member 20/29 | (RefSeq) mitochondrial arginine transporter BAC2-like (A)	mitochondrial arginine transporter BAC2-like [Chenopodium quinoa]	RecName: Full=Mitochondrial arginine transporter BAC2; AltName: Full=Mitochondrial basic amino acid carrier 2; Short=AtMBAC2;	SubName: Full=Uncharacterized protein {ECO:0000313|EMBL:KNA17224.1};	Mitochondrial carrier protein	GO:0016021,integral component of membrane; GO:0005743,mitochondrial inner membrane; GO:0005739,mitochondrion; GO:0015181,arginine transmembrane transporter activity; GO:0005290,L-histidine transmembrane transporter activity; GO:0015189,L-lysine transmembrane transporter activity; GO:0000064,L-ornithine transmembrane transporter activity; GO:0006844,acyl carnitine transport; GO:0006972,hyperosmoti…	Mitochondrial carrier protein
gene-LOC110703412	0.03	0.03	0	1.06	2.95	7.39	1	1	0	30	94	202	0.006	-7.485	5.22627e-09	7.42419e-07	down	NW_018744718.1	3100298	3103965	+	LOC110703412	--	K00224 chloroplastic oxoene reductase [EC:1.3.1.-] | (RefSeq) quinone-oxidoreductase homolog, chloroplastic-like (A)	quinone-oxidoreductase homolog, chloroplastic-like [Chenopodium quinoa]	RecName: Full=Quinone-oxidoreductase homolog, chloroplastic; EC=1.-.-.-; AltName: Full=ceQORH;	SubName: Full=Uncharacterized protein {ECO:0000313|EMBL:KNA20716.1};	Zinc-binding oxidoreductase	GO:0009706,chloroplast inner membrane; GO:0016491,oxidoreductase activity	Zinc-binding dehydrogenase
gene-LOC110703424	0.17	1.38	0.28	4.24	1.24	4.86	9	71	13	207	68	229	0.164	-2.605	0.000522567	0.0160935	down	NW_018744718.1	3191110	3194469	+	LOC110703424	--	K17961 trimethyltridecatetraene/dimethylnonatriene synthase [EC:1.14.14.58 1.14.14.59] | (RefSeq) cytochrome P450 82G1-like (A)	cytochrome P450 82G1-like [Chenopodium quinoa]	RecName: Full=Cytochrome P450 82G1; EC=1.14.-.-;	SubName: Full=Uncharacterized protein {ECO:0000313|EMBL:KNA20708.1};	Cytochrome P450 CYP2 subfamily	GO:0016021,integral component of membrane; GO:0016020,membrane; GO:0097008,(3E)-4,8-dimethyl-1,3,7-nonatriene synthase activity; GO:0097007,4,8,12-trimethyltrideca-1,3,7,11-tetraene synthase activity; GO:0020037,heme binding; GO:0005506,iron ion binding; GO:0006952,defense response; GO:0044550,secondary metabolite biosynthetic process; GO:0046246,terpene biosynthetic process; GO:0016114,terpenoid…	Cytochrome P450
gene-LOC110703429	0.03	0.09	0.1	0.43	0.47	1.05	1	3	3	13	16	31	0.109	-3.199	0.000673058	0.019206	down	NW_018744718.1	3234982	3243019	-	LOC110703429	--	K10949 ER lumen protein retaining receptor | (RefSeq) putative ER lumen protein-retaining receptor C28H8.4 (A)	putative ER lumen protein-retaining receptor C28H8.4 isoform X1 [Chenopodium quinoa]	RecName: Full=ER lumen protein-retaining receptor A; AltName: Full=HDEL receptor;	SubName: Full=Uncharacterized protein {ECO:0000313|EMBL:KMS97096.1};	ER lumen protein retaining receptor	GO:0005801,cis-Golgi network; GO:0005783,endoplasmic reticulum; GO:0005789,endoplasmic reticulum membrane; GO:0005794,Golgi apparatus; GO:0016021,integral component of membrane; GO:0046923,ER retention sequence binding; GO:0006621,protein retention in ER lumen; GO:0015031,protein transport; GO:0016192,vesicle-mediated transport	ER lumen protein retaining receptor
gene-LOC110703434	0	0	0	0.08	0.18	0.37	0	0	0	3	8	14	0.021	-5.606	0.00226569	0.0450879	down	NW_018744718.1	3263523	3268524	+	LOC110703434	--	--	--	--	--	--	--	--
gene-LOC110703930	2.7	3.58	2.65	0.11	0.07	1.16	279	362	241	11	8	108	6.137	2.617	0.00219661	0.0440793	up	NW_018744790.1	1413438	1422081	-	LOC110703930	--	--	--	--	--	--	--	--
gene-LOC110703936	1.18	1.17	1.18	48.55	53.14	33	35	34	31	1344	1657	882	0.025	-5.303	6.69434e-69	8.01982e-65	down	NW_018744790.1	1581788	1585064	+	LOC110703936	--	K15382 solute carrier family 50 (sugar transporter) | (RefSeq) bidirectional sugar transporter N3-like (A)	bidirectional sugar transporter N3-like [Chenopodium quinoa]	RecName: Full=Bidirectional sugar transporter SWEET14; Short=OsSWEET14;	RecName: Full=Bidirectional sugar transporter SWEET {ECO:0000256|RuleBase:RU910715};	Multitransmembrane protein	GO:0016021,integral component of membrane; GO:0005887,integral component of plasma membrane; GO:0008515,sucrose transmembrane transporter activity; GO:0051119,sugar transmembrane transporter activity; GO:0015770,sucrose transport	Sugar efflux transporter for intercellular exchange
gene-LOC110704177	0.08	0.13	0.08	0.6	0.28	0.29	7	11	6	49	26	23	0.239	-2.065	0.000731979	0.0204886	down	NW_018744821.1	2441667	2447841	-	LOC110704177	--	K13126 polyadenylate-binding protein | (RefSeq) polyadenylate-binding protein 5-like (A)	polyadenylate-binding protein 5-like [Chenopodium quinoa]	RecName: Full=Polyadenylate-binding protein 5; Short=PABP-5; Short=Poly(A)-binding protein 5;	SubName: Full=Uncharacterized protein {ECO:0000313|EMBL:KNA15143.1};	Polyadenylate-binding protein (RRM superfamily)	GO:0005829,cytosol; GO:0005634,nucleus; GO:0008143,poly(A) binding; GO:0000289,nuclear-transcribed mRNA poly(A) tail shortening; GO:0006417,regulation of translation; GO:0006413,translational initiation	RNA recognition motif. (a.k.a. RRM, RBD, or RNP domain)
gene-LOC110704238	6.11	7.47	7.72	3.09	0.97	3.64	168	201	187	79	28	90	2.698	1.432	0.00217237	0.043666	up	NW_018744828.1	10471	13066	-	LOC110704238	--	K00430 peroxidase [EC:1.11.1.7] | (RefSeq) peroxidase 12-like (A)	peroxidase 12-like [Chenopodium quinoa]	RecName: Full=Peroxidase 12; Short=Atperox P12; EC=1.11.1.7; AltName: Full=ATP4a; AltName: Full=PRXR6; Flags: Precursor;	RecName: Full=Peroxidase {ECO:0000256|RuleBase:RU362060, ECO:0000256|SAAS:SAAS00709852}; EC=1.11.1.7 {ECO:0000256|RuleBase:RU362060, ECO:0000256|SAAS:SAAS00709852};	--	GO:0005618,cell wall; GO:0005576,extracellular region; GO:0016020,membrane; GO:0009505,plant-type cell wall; GO:0009506,plasmodesma; GO:0005773,vacuole; GO:0020037,heme binding; GO:0046872,metal ion binding; GO:0004601,peroxidase activity; GO:0042744,hydrogen peroxide catabolic process; GO:0009664,plant-type cell wall organization; GO:0006979,response to oxidative stress	Peroxidase
gene-LOC110704246	3.48	3.44	2.02	15.86	9.89	12.27	164	159	84	696	489	520	0.231	-2.112	7.44824e-12	1.83349e-09	down	NW_018744828.1	113657	115969	-	LOC110704246	--	K13415 protein brassinosteroid insensitive 1 [EC:2.7.10.1 2.7.11.1] | (Kazusa) Lj1g3v1222380.1; - (A)	leucine-rich repeat receptor protein kinase EMS1-like [Chenopodium quinoa]	RecName: Full=Leucine-rich repeat receptor protein kinase EMS1 {ECO:0000305}; EC=2.7.11.1; AltName: Full=Protein EXCESS MICROSPOROCYTES 1 {ECO:0000303|PubMed:12154130}; AltName: Full=Protein EXTRA SPOROGENOUS CELLS {ECO:0000303|PubMed:12401166}; Flags: Precursor;	SubName: Full=Uncharacterized protein {ECO:0000313|EMBL:KNA24539.1};	Serine/threonine protein kinase	GO:0016021,integral component of membrane; GO:0016020,membrane; GO:0005886,plasma membrane; GO:0005524,ATP binding; GO:0004674,protein serine/threonine kinase activity; GO:0019199,transmembrane receptor protein kinase activity; GO:0010234,anther wall tapetum cell fate specification; GO:0009556,microsporogenesis; GO:0046777,protein autophosphorylation	Protein tyrosine kinase
gene-LOC110704261	287.59	202.44	171.2	467.97	465.4	556.66	6998	4824	3670	10602	11877	12177	0.434	-1.205	9.77719e-05	0.00430628	down	NW_018744828.1	509049	510926	-	LOC110704261	--	--	probable peroxisomal membrane protein PEX13 [Chenopodium quinoa]	RecName: Full=Abscisic stress-ripening protein 1;	SubName: Full=Abscisic acid stress ripening protein {ECO:0000313|EMBL:ACI15208.1};	--	GO:0005622,intracellular; GO:0005634,nucleus; GO:0043234,NA; GO:0042803,protein homodimerization activity; GO:0008270,zinc ion binding; GO:0009414,response to water deprivation	ABA/WDS induced protein
gene-LOC110704284	0.12	0	0.13	0.67	1.04	0.61	3	0	3	16	28	14	0.104	-3.264	0.00121934	0.0295701	down	NW_018744830.1	432540	434557	+	LOC110704284	--	K02218 casein kinase 1 [EC:2.7.11.1] | (RefSeq) uncharacterized protein LOC8069780 (A)	uncharacterized protein LOC110704284 [Chenopodium quinoa]	RecName: Full=Protein ALP1-like {ECO:0000305}; EC=3.1.-.-;	SubName: Full=Uncharacterized protein {ECO:0000313|EMBL:KNA24023.1};	Predicted transposase	GO:0005634,nucleus; GO:0046872,metal ion binding; GO:0004518,nuclease activity	DDE superfamily endonuclease
gene-LOC110704353	0.12	0	0.07	0.19	1.54	0.8	6	0	3	9	81	36	0.072	-3.806	0.00062261	0.0181628	down	NW_018744835.1	1859880	1862736	+	LOC110704353	--	K01193 beta-fructofuranosidase [EC:3.2.1.26] | (RefSeq) LOC109747879; beta-fructofuranosidase, insoluble isoenzyme 3-like (A)	UPF0481 protein At3g47200-like [Chenopodium quinoa]	RecName: Full=UPF0481 protein At3g47200;	SubName: Full=Uncharacterized protein {ECO:0000313|EMBL:KNA24929.1};	--	GO:0016021,integral component of membrane; GO:0005886,plasma membrane	Plant protein of unknown function
gene-LOC110704486	1.86	2.5	2.26	5.96	3.48	3.85	94	124	101	281	185	175	0.486	-1.042	9.15573e-05	0.00410545	down	NW_018744835.1	1599557	1605562	-	LOC110704486	--	K16241 transcription factor HY5 | (RefSeq) transcription factor HY5-like (A)	transcription factor HY5-like [Chenopodium quinoa]	RecName: Full=Transcription factor HY5; AltName: Full=Protein LONG HYPOCOTYL 5; AltName: Full=bZIP transcription factor 56; Short=AtbZIP56;	SubName: Full=Uncharacterized protein {ECO:0000313|EMBL:KNA16013.1};	Transcriptional activator FOSB/c-Fos and related bZIP transcription factors	GO:0005634,nucleus; GO:0032993,protein-DNA complex; GO:0003677,DNA binding; GO:0003700,DNA-binding transcription factor activity; GO:0003690,double-stranded DNA binding; GO:0000977,RNA polymerase II regulatory region sequence-specific DNA binding; GO:0043565,sequence-specific DNA binding; GO:0044212,transcription regulatory region DNA binding; GO:0009738,abscisic acid-activated signaling pathway;…	bZIP transcription factor
gene-LOC110704780	98.04	118.09	176.64	60.88	73.67	36.21	991	1169	1573	573	781	329	2.207	1.142	0.00108211	0.0269904	up	NW_018744858.1	1539690	1540185	+	LOC110704780	--	--	arabinogalactan peptide 13-like [Chenopodium quinoa]	--	SubName: Full=Uncharacterized protein {ECO:0000313|EMBL:KNA05580.1};	--	GO:0016021,integral component of membrane	--
gene-LOC110704795	70.7	126.58	146.85	59.42	28.75	20.77	1435	2516	2626	1123	612	379	3.101	1.633	2.49335e-05	0.00142015	up	NW_018744858.1	1977032	1979288	+	LOC110704795	--	K02989 small subunit ribosomal protein S5e | (RefSeq) 40S ribosomal protein S5 (A)	40S ribosomal protein S5 [Chenopodium quinoa]	RecName: Full=40S ribosomal protein S5-2;	SubName: Full=Uncharacterized protein {ECO:0000313|EMBL:KMT16447.1};	Ribosomal protein S7	GO:0005618,cell wall; GO:0009507,chloroplast; GO:0022626,cytosolic ribosome; GO:0022627,cytosolic small ribosomal subunit; GO:0005886,plasma membrane; GO:0009506,plasmodesma; GO:0005773,vacuole; GO:0003729,mRNA binding; GO:0019843,rRNA binding; GO:0003735,structural constituent of ribosome; GO:0000028,ribosomal small subunit assembly; GO:0006412,translation	Ribosomal protein S7p/S5e
gene-LOC110704865	0.28	0.21	0.31	1.04	1.54	0.5	26	19	25	89	148	41	0.253	-1.985	0.00023814	0.00876921	down	NW_018744874.1	1145232	1152724	-	LOC110704865	--	K13428 LRR receptor-like serine/threonine-protein kinase EFR [EC:2.7.11.1] | (RefSeq) LRR receptor-like serine/threonine-protein kinase EFR isoform X1 (A)	putative receptor-like protein kinase At3g47110 [Chenopodium quinoa]	RecName: Full=Probable LRR receptor-like serine/threonine-protein kinase At3g47570; EC=2.7.11.1; Flags: Precursor;	SubName: Full=Uncharacterized protein {ECO:0000313|EMBL:KDP44797.1};	--	GO:0016021,integral component of membrane; GO:0005886,plasma membrane; GO:0005524,ATP binding; GO:0004674,protein serine/threonine kinase activity	Protein tyrosine kinase
gene-LOC110704867	0.62	0.17	0.07	1.34	3.54	1.28	19	5	2	38	113	35	0.14	-2.837	0.000988943	0.0253876	down	NW_018744874.1	1152771	1154367	-	LOC110704867	--	K19613 leucine-rich repeat protein SHOC2 | (RefSeq) probable LRR receptor-like serine/threonine-protein kinase At3g47570 (A)	LRR receptor-like serine/threonine-protein kinase EFR [Chenopodium quinoa]	RecName: Full=Probable LRR receptor-like serine/threonine-protein kinase At3g47570; EC=2.7.11.1; Flags: Precursor;	SubName: Full=Uncharacterized protein {ECO:0000313|EMBL:KNA12895.1};	--	GO:0016021,integral component of membrane; GO:0005886,plasma membrane; GO:0005524,ATP binding; GO:0004674,protein serine/threonine kinase activity	Leucine rich repeat
gene-LOC110704924	6.37	9.48	5.68	44.26	22.95	9.84	116	169	91	750	438	161	0.277	-1.851	0.000108696	0.00462858	down	NW_018744874.1	2988209	2989101	+	LOC110704924	--	K14488 SAUR family protein | (RefSeq) auxin-responsive protein SAUR21-like (A)	auxin-responsive protein SAUR21-like [Chenopodium quinoa]	RecName: Full=Auxin-responsive protein SAUR21 {ECO:0000305}; AltName: Full=Protein SMALL AUXIN UP RNA 21 {ECO:0000303|PubMed:12036261};	SubName: Full=Uncharacterized protein {ECO:0000313|EMBL:KNA20090.1};	--	GO:0005886,plasma membrane; GO:0009734,auxin-activated signaling pathway; GO:0007275,multicellular organism development; GO:0040008,regulation of growth	Auxin responsive protein
gene-LOC110704958	370.07	1128.8	325.29	273.44	38.11	66.5	5287	15792	4094	3637	571	854	4.796	2.262	0.000495237	0.015437	up	NW_018744874.1	318720	319705	-	LOC110704958	--	--	uncharacterized protein LOC110704958 [Chenopodium quinoa]	--	SubName: Full=Uncharacterized protein {ECO:0000313|EMBL:KNA24832.1};	--	--	--
gene-LOC110704979	9.29	12.18	13.13	5.76	4.52	6.1	464	596	578	268	237	274	2.03	1.021	5.99975e-06	0.000413879	up	NW_018744874.1	591085	594433	-	LOC110704979	--	K14491 two-component response regulator ARR-B family | (RefSeq) two-component response regulator ORR24-like (A)	transcription factor HHO6-like [Chenopodium quinoa]	RecName: Full=Myb family transcription factor EFM {ECO:0000303|PubMed:25132385}; AltName: Full=MYB-domain transcription factor HHO4 {ECO:0000305}; AltName: Full=Protein EARLY FLOWERING MYB {ECO:0000303|PubMed:25132385}; AltName: Full=Protein HRS1 HOMOLOG 4 {ECO:0000305};	SubName: Full=Uncharacterized protein {ECO:0000313|EMBL:KNA22891.1};	--	GO:0005634,nucleus; GO:0003677,DNA binding; GO:0003700,DNA-binding transcription factor activity; GO:0009908,flower development; GO:0009740,gibberellic acid mediated signaling pathway; GO:0010452,histone H3-K36 methylation; GO:0048579,negative regulation of long-day photoperiodism, flowering; GO:1903507,negative regulation of nucleic acid-templated transcription; GO:0006355,regulation of transcri…	Myb-like DNA-binding domain
gene-LOC110705013	9.19	3.23	1.73	14.83	20.29	19.04	706	243	117	1061	1635	1315	0.262	-1.934	0.000979072	0.0252062	down	NW_018744874.1	868074	874883	-	LOC110705013	--	K19729 guanine nucleotide-binding protein G(t) subunit alpha 3 | (RefSeq) guanine nucleotide-binding protein alpha-1 subunit isoform X1 (A)	extra-large guanine nucleotide-binding protein 1-like [Chenopodium quinoa]	RecName: Full=Extra-large guanine nucleotide-binding protein 1; AltName: Full=Extra-large GTP-binding protein 1; Short=Extra-large G-protein 1;	SubName: Full=Uncharacterized protein {ECO:0000313|EMBL:KNA14590.1};	G-protein alpha subunit (small G protein superfamily)	GO:0005834,heterotrimeric G-protein complex; GO:0005634,nucleus; GO:0031683,G-protein beta/gamma-subunit complex binding; GO:0001664,G protein-coupled receptor binding; GO:0005525,GTP binding; GO:0003924,GTPase activity; GO:0046872,metal ion binding; GO:0004871,NA; GO:0007188,adenylate cyclase-modulating G protein-coupled receptor signaling pathway	G-protein alpha subunit
gene-LOC110705092	59.82	74.01	170.95	55.11	18.98	28.41	1040	1260	2618	892	346	444	2.947	1.559	0.000892087	0.0235401	up	NW_018744874.1	1662573	1663706	+	LOC110705092	--	K13195 cold-inducible RNA-binding protein | (RefSeq) glycine-rich RNA-binding protein-like (A)	glycine-rich RNA-binding protein-like [Chenopodium quinoa]	RecName: Full=Glycine-rich RNA-binding protein GRP1A;	SubName: Full=Uncharacterized protein {ECO:0000313|EMBL:KNA17122.1};	FOG: RRM domain	GO:0005634,nucleus; GO:0003723,RNA binding	RNA recognition motif. (a.k.a. RRM, RBD, or RNP domain)
gene-LOC110705109	0.52	0.51	0.66	1.41	1.93	1.93	53	51	59	134	206	177	0.305	-1.712	6.06353e-07	5.58777e-05	down	NW_018742204.1	5372280	5377811	-	LOC110705109	--	--	--	--	--	--	--	--
gene-LOC110705116	9.81	5.76	4.6	12.08	23.47	21.47	390	224	161	447	978	767	0.342	-1.547	0.000596081	0.0176613	down	NW_018744874.1	1882988	1885020	+	LOC110705116	--	K08900 mitochondrial chaperone BCS1 | (RefSeq) AAA-ATPase At3g50940-like (A)	AAA-ATPase At3g50940-like [Chenopodium quinoa]	RecName: Full=Protein HYPER-SENSITIVITY-RELATED 4 {ECO:0000303|PubMed:15181213}; Short=AtHSR4 {ECO:0000303|PubMed:15181213}; EC=3.6.1.3 {ECO:0000250|UniProtKB:Q9FLD5}; AltName: Full=BCS1-like protein;	SubName: Full=Uncharacterized protein {ECO:0000313|EMBL:KNA19279.1};	AAA+-type ATPase	GO:0016021,integral component of membrane; GO:0005740,mitochondrial envelope; GO:0005741,mitochondrial outer membrane; GO:0005739,mitochondrion; GO:0005524,ATP binding; GO:0016887,ATPase activity; GO:0042802,identical protein binding; GO:0008219,cell death; GO:0009626,plant-type hypersensitive response; GO:0009617,response to bacterium; GO:0002237,response to molecule of bacterial origin; GO:0009…	Domain associated at C-terminal with AAA
gene-LOC110705201	6.14	9.9	15.06	6.89	2.48	2.14	316	499	683	330	134	99	2.685	1.425	0.00246414	0.0477418	up	NW_018744874.1	2757489	2762799	+	LOC110705201	--	K05544 tRNA-dihydrouridine synthase 3 [EC:1.3.1.89] | (RefSeq) tRNA-dihydrouridine(47) synthase [NAD(P)(+)]-like (A)	tRNA-dihydrouridine(47) synthase [NAD(P)(+)]	RecName: Full=tRNA-dihydrouridine(47) synthase [NAD(P)(+)]-like; EC=1.3.1.-; AltName: Full=Zinc finger CCCH domain-containing protein 50; Short=AtC3H50; AltName: Full=tRNA-dihydrouridine synthase 3-like;	RecName: Full=tRNA-dihydrouridine(47) synthase [NAD(P)(+)] {ECO:0000256|RuleBase:RU291113}; EC=1.3.1.- {ECO:0000256|RuleBase:RU291113}; AltName: Full=tRNA-dihydrouridine synthase 3 {ECO:0000256|RuleBase:RU291113};	Uncharacterized conserved protein	GO:0005773,vacuole; GO:0050660,flavin adenine dinucleotide binding; GO:0046872,metal ion binding; GO:0017150,tRNA dihydrouridine synthase activity	Dihydrouridine synthase (Dus)
gene-LOC110705234	41.67	147.42	43.01	9.15	20.54	25.21	1335	4625	1214	273	690	726	3.804	1.927	0.00044875	0.0142726	up	NW_018744874.1	3179624	3185126	-	LOC110705234	--	--	uncharacterized protein LOC110705234 [Chenopodium quinoa]	--	--	--	--	Kelch motif
gene-LOC110705282	0.83	0.54	1.1	2.7	3.09	4.32	52	33	61	158	204	244	0.235	-2.092	6.20101e-07	5.68531e-05	down	NW_018744878.1	6105471	6109278	-	LOC110705282	--	--	--	--	--	--	--	--
gene-LOC110705289	1.55	2.04	0.93	4.96	3.66	13.18	38	49	20	113	94	290	0.197	-2.346	5.79332e-05	0.00287189	down	NW_018744878.1	898476	899928	+	LOC110705289	--	K13424 WRKY transcription factor 33 | (RefSeq) probable WRKY transcription factor 33 (A)	probable WRKY transcription factor 50 isoform X1 [Chenopodium quinoa]	RecName: Full=Probable WRKY transcription factor 50; AltName: Full=WRKY DNA-binding protein 50;	SubName: Full=Uncharacterized protein {ECO:0000313|EMBL:KNA14459.1};	--	GO:0005634,nucleus; GO:0003700,DNA-binding transcription factor activity; GO:0043565,sequence-specific DNA binding; GO:0050832,defense response to fungus; GO:0009867,jasmonic acid mediated signaling pathway; GO:0006351,transcription, DNA-templated	WRKY DNA -binding domain
gene-LOC110705314	3.24	2.72	3.07	0.97	1.25	0.96	79	65	66	22	32	21	2.743	1.456	0.00034833	0.011766	up	NW_018744878.1	3374078	3375274	+	LOC110705314	--	K14313 nuclear pore complex protein Nup53 | (RefSeq) uncharacterized protein LOC113341515 (A)	mitogen-activated protein kinase kinase kinase 1-like [Chenopodium quinoa]	--	SubName: Full=Uncharacterized protein {ECO:0000313|EMBL:KNA05921.1};	--	GO:0008270,zinc ion binding	Ring finger domain
gene-LOC110705337	6.45	7.44	11.79	4.49	1.82	2.92	54	61	87	35	16	22	2.734	1.451	0.00231109	0.045688	up	NW_018744878.1	5816242	5816787	-	LOC110705337	--	--	uncharacterized protein LOC110705337 [Chenopodium quinoa]	--	SubName: Full=Uncharacterized protein {ECO:0000313|EMBL:KNA11543.1};	--	--	--
gene-LOC110705342	0.64	1.02	0.53	0.06	0.11	0	23	36	17	2	4	0	12.29	3.619	0.000117803	0.00498099	up	NW_018744878.1	19457	24115	-	LOC110705342	--	K10739 replication factor A2 | (RefSeq) replication protein A 32 kDa subunit A-like (A)	replication protein A 32 kDa subunit A-like [Chenopodium quinoa]	RecName: Full=Replication protein A 32 kDa subunit A; Short=AtRPA32A; Short=RP-A p32 A; AltName: Full=DNA replication protein A2 subunit A; AltName: Full=Protein SUPPRESSOR OF ROS1; AltName: Full=Replication factor A protein 2 A; Short=AtRPA2 A; Short=RF-A protein 2 A; AltName: Full=Replicon protein A2 A;	SubName: Full=Uncharacterized protein {ECO:0000313|EMBL:OAY53515.1};	Single-stranded DNA-binding replication protein A (RPA), medium (30 kD) subunit	GO:0005634,nucleus; GO:0003677,DNA binding; GO:0006310,DNA recombination; GO:0006281,DNA repair; GO:0006260,DNA replication; GO:0016458,gene silencing	Replication protein A C terminal
gene-LOC110705369	2.9	14.3	7.95	4.1	1.67	0.74	230	1109	555	302	139	53	3.737	1.902	0.00199904	0.0413102	up	NW_018744878.1	454561	463213	-	LOC110705369	--	K20718 LRR receptor-like serine/threonine-protein kinase ERECTA [EC:2.7.11.1] | (RefSeq) LRR receptor-like serine/threonine-protein kinase ERECTA (A)	LRR receptor-like serine/threonine-protein kinase ERECTA [Chenopodium quinoa]	RecName: Full=LRR receptor-like serine/threonine-protein kinase ERECTA {ECO:0000303|PubMed:8624444}; EC=2.7.11.1; AltName: Full=Protein QUANTITATIVE RESISTANCE TO PLECTOSPHAERELLA 1; AltName: Full=Protein QUANTITATIVE RESISTANCE TO RALSTONIA SOLANACEARUM 1; AltName: Full=Protein TRANSPIRATION EFFICIENCY 1; Flags: Precursor;	SubName: Full=Uncharacterized protein {ECO:0000313|EMBL:KNA12611.1};	--	GO:0016021,integral component of membrane; GO:0005739,mitochondrion; GO:0005886,plasma membrane; GO:0005524,ATP binding; GO:0042277,peptide binding; GO:0004674,protein serine/threonine kinase activity; GO:0019199,transmembrane receptor protein kinase activity; GO:0070370,cellular heat acclimation; GO:0042742,defense response to bacterium; GO:0050832,defense response to fungus; GO:0048281,inflores…	Leucine rich repeat
gene-LOC110705375	13.65	13.8	17.22	6.44	5.85	9.08	296	293	329	130	133	177	2.011	1.008	0.000801702	0.0218483	up	NW_018744878.1	518595	522186	+	LOC110705375	--	--	uncharacterized protein LOC110705375 isoform X1 [Chenopodium quinoa]	--	SubName: Full=Uncharacterized protein {ECO:0000313|EMBL:KNA12797.1};	--	--	--
gene-LOC110705423	0.71	1.52	1.46	2.98	3.91	2.14	31	65	56	121	179	84	0.384	-1.38	0.000854808	0.0228755	down	NW_018744878.1	1147802	1150821	+	LOC110705423	--	--	protein IQ-DOMAIN 1-like [Chenopodium quinoa]	RecName: Full=Protein IQ-DOMAIN 1 {ECO:0000303|PubMed:15960618};	SubName: Full=Uncharacterized protein {ECO:0000313|EMBL:KNA25786.1};	--	GO:0005737,cytoplasm; GO:0005874,microtubule; GO:0005634,nucleus; GO:0005516,calmodulin binding; GO:0008017,microtubule binding	Protein of unknown function (DUF4005)
gene-LOC110705447	0.03	0.11	0	0.42	0.37	0.3	2	7	0	26	26	18	0.12	-3.056	0.00113847	0.0280598	down	NW_018744878.1	1792558	1811742	+	LOC110705447	--	--	F-box/kelch-repeat protein At3g06240-like [Chenopodium quinoa]	RecName: Full=F-box protein At3g07870;	SubName: Full=Uncharacterized protein {ECO:0000313|EMBL:PIN13940.1};	--	GO:0009506,plasmodesma; GO:0008284,positive regulation of cell proliferation	--
gene-LOC110705488	0.88	1.55	0.38	2.96	3.49	5.46	32	55	12	100	133	178	0.221	-2.175	5.99985e-05	0.00294986	down	NW_018744878.1	2274988	2280435	+	LOC110705488	--	K01369 legumain [EC:3.4.22.34] | (RefSeq) vacuolar-processing enzyme alpha-isozyme-like (A)	vacuolar-processing enzyme alpha-isozyme-like [Chenopodium quinoa]	RecName: Full=Vacuolar-processing enzyme alpha-isozyme; EC=3.4.22.34 {ECO:0000250|UniProtKB:Q84LM2}; AltName: Full=Alpha-VPE; AltName: Full=Asparaginyl endopeptidase alpha-VPE {ECO:0000305}; Flags: Precursor;	SubName: Full=Uncharacterized protein {ECO:0000313|EMBL:KNA12580.1};	Asparaginyl peptidases	GO:0000326,protein storage vacuole; GO:0004197,cysteine-type endopeptidase activity; GO:0051603,proteolysis involved in cellular protein catabolic process; GO:0006624,vacuolar protein processing	Peptidase C13 family
gene-LOC110705497	0.64	1.75	0.72	0.05	0.09	0	13	35	13	1	2	0	19.323	4.272	0.000276963	0.00988485	up	NW_018744878.1	2402751	2404132	+	LOC110705497	--	K01369 legumain [EC:3.4.22.34] | (RefSeq) vacuolar-processing enzyme-like (A)	vacuolar-processing enzyme-like [Chenopodium quinoa]	RecName: Full=Vacuolar-processing enzyme; Short=VPE; EC=3.4.22.-; Flags: Precursor;	SubName: Full=Uncharacterized protein {ECO:0000313|EMBL:KNA12578.1};	Asparaginyl peptidases	GO:0008234,cysteine-type peptidase activity	Peptidase C13 family
gene-LOC110705526	19.33	40.21	49.01	22.48	9.24	10.45	397	809	887	430	199	193	2.515	1.33	0.00106481	0.0266871	up	NW_018744878.1	2823303	2825548	-	LOC110705526	--	K02934 large subunit ribosomal protein L6e | (RefSeq) 60S ribosomal protein L6-like (A)	60S ribosomal protein L6-like [Chenopodium quinoa]	RecName: Full=60S ribosomal protein L6; AltName: Full=YL16-like;	RecName: Full=60S ribosomal protein L6 {ECO:0000256|RuleBase:RU000662};	60s ribosomal protein L6	GO:0005840,ribosome; GO:0003735,structural constituent of ribosome; GO:0006412,translation	Ribosomal protein L6e
gene-LOC110705534	13.06	8.15	11.18	6.68	1.91	2.26	836	511	630	398	128	130	3.073	1.619	0.00052254	0.0160935	up	NW_018742410.1	810685	814347	-	LOC110705534	--	K09571 FK506-binding protein 4/5 [EC:5.2.1.8] | (RefSeq) 70 kDa peptidyl-prolyl isomerase-like (A)	protein PHOX4-like [Chenopodium quinoa]	RecName: Full=Protein PHOX1 {ECO:0000303|PubMed:20856808}; AltName: Full=Protein MADB1 {ECO:0000303|PubMed:28096376}; AltName: Full=Putative myosin adapter B1 {ECO:0000303|PubMed:28096376};	SubName: Full=Uncharacterized protein {ECO:0000313|EMBL:KNA14034.1};	Myosin assembly protein/sexual cycle protein and related proteins	GO:0030659,cytoplasmic vesicle membrane	PB1 domain
gene-LOC110705552	0.88	0.57	0.51	0.19	0.15	0.13	39	25	20	8	7	5	4.146	2.052	0.00176528	0.0382425	up	NW_018744878.1	3212802	3216820	-	LOC110705552	--	K21435 ankyrin repeat domain-containing protein 6 | (RefSeq) mucin-17-like (A)	ankyrin repeat-containing protein NPR4-like [Chenopodium quinoa]	RecName: Full=Ankyrin repeat-containing protein BDA1 {ECO:0000305}; AltName: Full=Protein BIAN DA 1 {ECO:0000303|PubMed:22740615};	SubName: Full=Uncharacterized protein {ECO:0000313|EMBL:KNA11865.1};	FOG: Ankyrin repeat	GO:0016021,integral component of membrane; GO:0005886,plasma membrane; GO:0045087,innate immune response; GO:0009751,response to salicylic acid	Domain of unknown function
gene-LOC110705566	0.59	0.78	1.15	15.59	10.04	8.1	37	48	64	917	665	460	0.073	-3.786	8.03334e-30	1.15487e-26	down	NW_018744878.1	3400457	3409628	+	LOC110705566	--	K14304 nuclear pore complex protein Nup85 | (RefSeq) LOW QUALITY PROTEIN: nuclear pore complex protein NUP85-like (A)	LOW QUALITY PROTEIN: nuclear pore complex protein NUP85-like [Chenopodium quinoa]	RecName: Full=Nuclear pore complex protein NUP85; AltName: Full=Nuclear pore complex protein NUP75 {ECO:0000303|PubMed:21189294}; AltName: Full=Nucleoporin 75; AltName: Full=Nucleoporin 85;	SubName: Full=Uncharacterized protein {ECO:0000313|EMBL:KNA24439.1};	Nuclear pore complex component (sc Nup85)	GO:0005635,nuclear envelope; GO:0031080,nuclear pore outer ring; GO:0017056,structural constituent of nuclear pore; GO:0006406,mRNA export from nucleus; GO:0045893,positive regulation of transcription, DNA-templated; GO:0006606,protein import into nucleus; GO:0009737,response to abscisic acid	Nup85 Nucleoporin
gene-LOC110705586	0.32	0.14	0.26	6.29	6.54	6.71	7	3	5	128	150	132	0.036	-4.81	3.03849e-21	2.37398e-18	down	NW_018744878.1	3687250	3689067	-	LOC110705586	--	K09873 aquaporin TIP | (RefSeq) aquaporin TIP4-1-like (A)	aquaporin TIP4-1-like [Chenopodium quinoa]	RecName: Full=Aquaporin TIP4-1; AltName: Full=Epsilon-tonoplast intrinsic protein; Short=Epsilon-TIP; AltName: Full=Tonoplast intrinsic protein 4-1; Short=AtTIP4;1;	SubName: Full=Uncharacterized protein {ECO:0000313|EMBL:KNA17477.1};	Aquaporin (major intrinsic protein family)	GO:0042807,central vacuole; GO:0005887,integral component of plasma membrane; GO:0009705,plant-type vacuole membrane; GO:0015250,water channel activity; GO:0034220,ion transmembrane transport	Major intrinsic protein
gene-LOC110705594	7.34	11.49	8.85	30.79	29.97	33.71	340	521	361	1328	1456	1404	0.279	-1.844	1.29403e-18	7.75125e-16	down	NW_018744878.1	3764524	3771385	+	LOC110705594	--	--	--	--	--	--	--	--
gene-LOC110705596	0.9	0.39	0.48	8.79	6.18	9.15	21	9	10	192	152	193	0.073	-3.779	5.05083e-17	2.45307e-14	down	NW_018744878.1	3787644	3790786	-	LOC110705596	--	K07870 mitochondrial Rho GTPase 1 [EC:3.6.5.-] | (RefSeq) uncharacterized protein LOC103958384 (A)	bark storage protein A-like [Chenopodium quinoa]	RecName: Full=Bark storage protein A; Flags: Precursor;	SubName: Full=uncharacterized protein LOC109007371 isoform X2 {ECO:0000313|RefSeq:XP_018842573.1};	--	GO:0003824,catalytic activity; GO:0045735,nutrient reservoir activity; GO:0009116,nucleoside metabolic process	Phosphorylase superfamily
gene-LOC110705616	5.47	1.95	3.89	1.65	1.06	1.09	206	72	129	58	42	37	3.002	1.586	0.00145049	0.0332678	up	NW_018744878.1	4162780	4167115	+	LOC110705616	--	K14454 aspartate aminotransferase, cytoplasmic [EC:2.6.1.1] | (RefSeq) aspartate aminotransferase, cytoplasmic-like (A)	aspartate aminotransferase, cytoplasmic-like [Chenopodium quinoa]	RecName: Full=Aspartate aminotransferase 3, chloroplastic; EC=2.6.1.1; AltName: Full=Protein YELLOW-LEAF-SPECIFIC GENE 4; AltName: Full=Transaminase A; Flags: Precursor;	RecName: Full=Aspartate aminotransferase {ECO:0000256|RuleBase:RU000480}; EC=2.6.1.1 {ECO:0000256|RuleBase:RU000480};	Aspartate aminotransferase/Glutamic oxaloacetic transaminase AAT1/GOT2	GO:0009507,chloroplast; GO:0016020,membrane; GO:0005777,peroxisome; GO:0009536,plastid; GO:0004069,L-aspartate:2-oxoglutarate aminotransferase activity; GO:0080130,L-phenylalanine:2-oxoglutarate aminotransferase activity; GO:0030170,pyridoxal phosphate binding; GO:0006103,2-oxoglutarate metabolic process; GO:0006531,aspartate metabolic process; GO:0009058,biosynthetic process; GO:0006536,glutamat…	Aminotransferase class I and II
gene-LOC110705617	9.33	15.35	20.21	9.93	5.46	5.6	326	525	622	323	200	176	2.079	1.056	0.00172296	0.0376432	up	NW_018744878.1	4177017	4181658	-	LOC110705617	--	K11090 lupus La protein | (RefSeq) la protein 1-like (A)	la protein 1-like [Chenopodium quinoa]	RecName: Full=La protein 1; Short=AtLa1;	SubName: Full=Uncharacterized protein {ECO:0000313|EMBL:KNA21760.1};	FOG: RRM domain	GO:0005618,cell wall; GO:0005829,cytosol; GO:0030529,NA; GO:0005730,nucleolus; GO:0005654,nucleoplasm; GO:0003723,RNA binding; GO:0034470,ncRNA processing	La domain
gene-LOC110705642	8.15	12.11	4.32	15.69	13.12	49.68	270	393	126	484	456	1480	0.293	-1.769	0.00208769	0.0426077	down	NW_018744878.1	4497993	4500993	+	LOC110705642	--	K12472 epidermal growth factor receptor substrate 15 | (RefSeq) GATA zinc finger domain-containing protein 14-like (A)	BURP domain protein RD22-like [Chenopodium quinoa]	RecName: Full=BURP domain protein RD22 {ECO:0000303|PubMed:9790599}; AltName: Full=Dehydration-responsive protein RD22 {ECO:0000303|PubMed:8479424}; Flags: Precursor;	SubName: Full=Uncharacterized protein {ECO:0000313|EMBL:KNA12476.1};	--	GO:0005768,endosome; GO:0005794,Golgi apparatus; GO:0005802,trans-Golgi network; GO:0009651,response to salt stress	BURP domain
gene-LOC110705715	5.28	4.73	2.57	1.71	0.52	0.72	252	221	108	76	26	31	4.316	2.11	2.32733e-05	0.0013491	up	NW_018744878.1	5143483	5151168	-	LOC110705715	--	K16297 serine carboxypeptidase-like clade II [EC:3.4.16.-] | (RefSeq) serine carboxypeptidase-like 40 (A)	serine carboxypeptidase-like 40 [Chenopodium quinoa]	RecName: Full=Serine carboxypeptidase-like 40; EC=3.4.16.-; Flags: Precursor;	RecName: Full=Carboxypeptidase {ECO:0000256|RuleBase:RU361156}; EC=3.4.16.- {ECO:0000256|RuleBase:RU361156};	Serine carboxypeptidases (lysosomal cathepsin A)	GO:0005576,extracellular region; GO:0004185,serine-type carboxypeptidase activity; GO:0051603,proteolysis involved in cellular protein catabolic process	Serine carboxypeptidase
gene-LOC110705725	3.72	7.32	8.67	3.9	1.96	2.01	165	318	339	161	91	80	2.435	1.284	0.000818806	0.0221429	up	NW_018744878.1	5243317	5245493	+	LOC110705725	--	K17964 leucine-rich PPR motif-containing protein, mitochondrial | (RefSeq) hypothetical protein (A)	pentatricopeptide repeat-containing protein At3g02490, mitochondrial-like [Chenopodium quinoa]	RecName: Full=Pentatricopeptide repeat-containing protein At3g02490, mitochondrial; Flags: Precursor;	SubName: Full=Uncharacterized protein {ECO:0000313|EMBL:KNA23808.1};	FOG: PPR repeat	GO:0005739,mitochondrion; GO:0004519,endonuclease activity; GO:0003723,RNA binding; GO:0009451,RNA modification; GO:0008380,RNA splicing	PPR repeat family
gene-LOC110705731	52.71	79.59	40.4	106.44	179.58	144.43	1475	2181	996	2773	5270	3633	0.377	-1.409	4.17722e-05	0.00220033	down	NW_018744878.1	5286995	5289137	+	LOC110705731	--	K12135 zinc finger protein CONSTANS | (RefSeq) zinc finger protein CONSTANS-LIKE 2-like (A)	zinc finger protein CONSTANS-LIKE 2-like isoform X1 [Chenopodium quinoa]	RecName: Full=Zinc finger protein CONSTANS-LIKE 2;	SubName: Full=CONSTANS-like protein 1 {ECO:0000313|EMBL:ACB36911.2};	GATA-4/5/6 transcription factors	GO:0005634,nucleus; GO:0003677,DNA binding; GO:0003700,DNA-binding transcription factor activity; GO:0008270,zinc ion binding; GO:0009658,chloroplast organization; GO:0009909,regulation of flower development; GO:0009416,response to light stimulus; GO:0006351,transcription, DNA-templated	CCT motif
gene-LOC110705746	10.32	18.74	21.97	10.36	4.32	3.38	408	725	765	381	179	120	2.787	1.479	0.000480182	0.0150723	up	NW_018744878.1	5424590	5427893	+	LOC110705746	--	K01951 GMP synthase (glutamine-hydrolysing) [EC:6.3.5.2] | (RefSeq) uncharacterized protein LOC110705746 (A)	uncharacterized protein LOC110705746 [Chenopodium quinoa]	--	SubName: Full=Uncharacterized protein {ECO:0000313|EMBL:KNA15850.1};	GMP synthase	GO:0005524,ATP binding; GO:0003922,GMP synthase (glutamine-hydrolyzing) activity; GO:0016462,pyrophosphatase activity; GO:0006177,GMP biosynthetic process	GMP synthase C terminal domain
gene-LOC110705749	1.96	1.55	3.28	0.81	0.36	0.7	155	120	229	60	30	50	3.567	1.835	4.02818e-05	0.00213844	up	NW_018744878.1	5446648	5456713	-	LOC110705749	--	K10908 DNA-directed RNA polymerase, mitochondrial [EC:2.7.7.6] | (RefSeq) DNA-directed RNA polymerase 2, chloroplastic/mitochondrial-like (A)	DNA-directed RNA polymerase 2, chloroplastic/mitochondrial-like [Chenopodium quinoa]	RecName: Full=DNA-directed RNA polymerase 2, chloroplastic/mitochondrial; EC=2.7.7.6; AltName: Full=NsRpoT-B; AltName: Full=T7 bacteriophage-type single subunit RNA polymerase 2; Flags: Precursor;	RecName: Full=DNA-directed RNA polymerase {ECO:0000256|RuleBase:RU003805}; EC=2.7.7.6 {ECO:0000256|RuleBase:RU003805};	Mitochondrial/chloroplast DNA-directed RNA polymerase RPO41, provides primers for DNA replication-initiation	GO:0009507,chloroplast; GO:0005739,mitochondrion; GO:0009536,plastid; GO:0003677,DNA binding; GO:0003899,DNA-directed 5'-3' RNA polymerase activity; GO:0006351,transcription, DNA-templated	DNA-dependent RNA polymerase
gene-LOC110705799	0.82	1.72	1.36	0	0.2	0.34	24	49	35	0	6	9	6.593	2.721	0.00262686	0.0497415	up	NW_018742410.1	1103518	1105166	-	LOC110705799	--	K09286 EREBP-like factor | (RefSeq) EREB109; ethylene-responsive transcription factor RAP2-13-like (A)	ethylene-responsive transcription factor ERF003-like [Chenopodium quinoa]	RecName: Full=Ethylene-responsive transcription factor ERF003;	SubName: Full=Uncharacterized protein {ECO:0000313|EMBL:KNA25548.1};	--	GO:0005634,nucleus; GO:0003677,DNA binding; GO:0003700,DNA-binding transcription factor activity; GO:0009873,ethylene-activated signaling pathway; GO:0006351,transcription, DNA-templated	AP2 domain
gene-LOC110705935	0.03	0.11	0.06	0.27	0.61	0.62	1	4	2	9	23	20	0.126	-2.992	0.00191177	0.0402514	down	NW_018744890.1	306654	308756	-	LOC110705935	--	--	--	--	--	--	--	--
gene-LOC110705964	0.85	0.71	0.79	2.48	1.42	2.2	28	23	23	76	49	65	0.38	-1.396	0.000791745	0.021705	down	NW_018744890.1	343518	347512	-	LOC110705964	--	K06911 uncharacterized protein | (RefSeq) pirin-like protein (A)	pirin-like protein [Chenopodium quinoa]	RecName: Full=Pirin-like protein;	SubName: Full=Uncharacterized protein {ECO:0000313|EMBL:KNA20667.1};	--	GO:0005634,nucleus	Pirin C-terminal cupin domain
gene-LOC110706002	1.08	1.66	1.47	0	0	0	39	59	47	0	0	0	252.949	7.983	7.09051e-10	1.13765e-07	up	NW_018744895.1	727410	732261	+	LOC110706002	--	--	--	--	--	--	--	--
gene-LOC110706016	0	0	0	3.73	3.77	4.62	0	0	0	51	58	61	0.003	-8.321	9.24057e-11	1.78552e-08	down	NW_018744895.1	1684671	1686710	+	LOC110706016	--	--	--	--	--	--	--	--
gene-LOC110706026	0.44	1.37	0.99	0.04	0	0.04	13	40	26	1	0	1	37.399	5.225	3.49014e-05	0.0018948	up	NW_018744895.1	2102722	2104628	-	LOC110706026	--	--	--	--	--	--	--	--
gene-LOC110706036	0	0	0	8.64	4.57	3.75	0	0	0	289	172	121	0.001	-10.051	1.0731e-15	4.33341e-13	down	NW_018744895.1	2456493	2458254	+	LOC110706036	--	K15397 3-ketoacyl-CoA synthase [EC:2.3.1.199] | (RefSeq) 3-ketoacyl-CoA synthase 19-like (A)	3-ketoacyl-CoA synthase 19-like [Chenopodium quinoa]	RecName: Full=3-ketoacyl-CoA synthase 19 {ECO:0000303|PubMed:18465198}; Short=KCS-19 {ECO:0000303|PubMed:18465198}; EC=2.3.1.199 {ECO:0000305}; AltName: Full=Very long-chain fatty acid condensing enzyme 19 {ECO:0000303|PubMed:18465198}; Short=VLCFA condensing enzyme 19 {ECO:0000303|PubMed:18465198};	RecName: Full=3-ketoacyl-CoA synthase {ECO:0000256|PIRNR:PIRNR036417}; EC=2.3.1.- {ECO:0000256|PIRNR:PIRNR036417};	--	GO:0016021,integral component of membrane; GO:0102336,3-oxo-arachidoyl-CoA synthase activity; GO:0102337,3-oxo-cerotoyl-CoA synthase activity; GO:0102338,3-oxo-lignoceronyl-CoA synthase activity; GO:0102756,very-long-chain 3-ketoacyl-CoA synthase activity; GO:0006633,fatty acid biosynthetic process; GO:0009409,response to cold; GO:0009416,response to light stimulus	FAE1/Type III polyketide synthase-like protein
gene-LOC110706038	0	0	0	0.87	0.91	0.43	0	0	0	59	70	28	0.003	-8.166	7.70152e-10	1.22475e-07	down	NW_018744895.1	2469784	2474959	+	LOC110706038	--	--	uncharacterized protein LOC110706038 [Chenopodium quinoa]	--	SubName: Full=Uncharacterized protein {ECO:0000313|EMBL:KNA17357.1};	--	--	--
gene-LOC110706050	0	0	0	1.21	0.93	0.47	0	0	0	75	65	28	0.003	-8.255	4.97218e-10	8.42925e-08	down	NW_018744895.1	2703747	2709290	-	LOC110706050	--	--	--	--	--	--	--	--
gene-LOC110706051	5.68	7.72	9.17	4.29	1.21	1.05	175	233	249	123	39	29	3.473	1.796	0.00043303	0.013908	up	NW_018744895.1	2682986	2685521	+	LOC110706051	--	--	--	--	--	--	--	--
gene-LOC110706054	0.26	0.63	0.35	1.82	6.98	7.46	5	12	6	33	143	131	0.069	-3.855	5.00058e-08	5.81621e-06	down	NW_018744895.1	2876293	2878761	-	LOC110706054	--	--	--	--	--	--	--	--
gene-LOC110706150	11.69	12.21	7.85	3.83	2.55	3.67	223	228	132	68	51	63	3.084	1.625	9.93279e-07	8.60203e-05	up	NW_018742412.1	230466	242153	-	LOC110706150	--	K17892 ferredoxin-thioredoxin reductase catalytic chain [EC:1.8.7.2] | (RefSeq) ferredoxin-thioredoxin reductase catalytic chain, chloroplastic-like (A)	ferredoxin-thioredoxin reductase catalytic chain, chloroplastic-like [Chenopodium quinoa]	RecName: Full=Ferredoxin-thioredoxin reductase catalytic chain, chloroplastic; Short=FTR-C; EC=1.8.7.2; AltName: Full=B1; AltName: Full=Ferredoxin-thioredoxin reductase subunit B; Short=FTR-B; Flags: Precursor;	RecName: Full=Ferredoxin-thioredoxin reductase, catalytic chain {ECO:0000256|PIRNR:PIRNR000260}; Short=FTR-C {ECO:0000256|PIRNR:PIRNR000260}; EC=1.8.7.2 {ECO:0000256|PIRNR:PIRNR000260}; AltName: Full=Ferredoxin-thioredoxin reductase subunit B {ECO:0000256|PIRNR:PIRNR000260};	--	GO:0009507,chloroplast; GO:0051539,4 iron, 4 sulfur cluster binding; GO:0009055,electron transfer activity; GO:0103012,ferredoxin-thioredoxin reductase activity; GO:0030385,ferredoxin:thioredoxin reductase activity; GO:0046872,metal ion binding; GO:0055114,oxidation-reduction process	Ferredoxin thioredoxin reductase catalytic beta chain
gene-LOC110706168	0	0	0	0.38	0.32	0.46	0	0	0	20	19	23	0.009	-6.866	1.3078e-06	0.000109308	down	NW_018742412.1	458490	461548	+	LOC110706168	--	K12153 phenylalanine N-monooxygenase [EC:1.14.14.40] | (RefSeq) isoleucine N-monooxygenase 2-like (A)	uncharacterized protein LOC110706168 [Chenopodium quinoa]	--	SubName: Full=uncharacterized protein LOC107962282 isoform X1 {ECO:0000313|RefSeq:XP_016754086.1};	--	--	Domain of unknown function (DUF4216)
gene-LOC110706215	0.12	0.08	0.14	0.34	0.84	2.72	3	2	3	8	22	61	0.081	-3.623	0.000392481	0.0128702	down	NW_018742412.1	673168	676076	-	LOC110706215	--	K03283 heat shock 70kDa protein 1/2/6/8 | (RefSeq) heat shock cognate 70 kDa protein 2-like isoform X1 (A)	uncharacterized protein LOC110706215 [Chenopodium quinoa]	--	SubName: Full=Uncharacterized protein {ECO:0000313|EMBL:CCB56350.1};	--	GO:0005737,cytoplasm; GO:0004791,thioredoxin-disulfide reductase activity; GO:0035556,intracellular signal transduction	C1 domain
gene-LOC110706218	0.02	0.03	0.03	0.16	0.12	0.32	2	2	2	12	10	23	0.126	-2.989	0.00248209	0.0479347	down	NW_018744939.1	748160	771038	+	LOC110706218	--	--	--	--	--	--	--	--
gene-LOC110706233	0.34	0.93	0.29	0	0	0	24	64	18	0	0	0	178.53	7.48	1.52489e-07	1.55254e-05	up	NW_018744949.1	298098	302395	+	LOC110706233	--	--	--	--	--	--	--	--
gene-LOC110706242	14.32	11.31	10.55	7.85	1.94	2.85	760	588	493	388	108	136	2.932	1.552	0.000876786	0.0232707	up	NW_018744949.1	1069413	1074154	+	LOC110706242	--	K07025 putative hydrolase of the HAD superfamily | (RefSeq) uncharacterized protein C24B11.05-like (A)	uncharacterized protein C24B11.05-like [Chenopodium quinoa]	--	SubName: Full=Uncharacterized protein {ECO:0000313|EMBL:KNA20418.1};	Haloacid dehalogenase-like hydrolase	GO:0016787,hydrolase activity; GO:0008152,metabolic process	Haloacid dehalogenase-like hydrolase
gene-LOC110706329	2.15	2.95	1.75	6.37	6.6	6.36	89	120	64	246	287	237	0.339	-1.559	2.40998e-08	2.94608e-06	down	NW_018744955.1	388951	391638	+	LOC110706329	--	--	--	--	--	--	--	--
gene-LOC110706359	2.08	2.77	4.98	0.88	0.46	0.91	56	73	118	22	13	22	4.233	2.082	4.41568e-05	0.00228345	up	NW_018744955.1	709718	711037	+	LOC110706359	--	K17782 mitochondrial intermembrane space import and assembly protein 40 | (RefSeq) uncharacterized protein LOC110706359 (A)	uncharacterized protein LOC110706359 [Chenopodium quinoa]	--	SubName: Full=Uncharacterized protein {ECO:0000313|EMBL:KNA14770.1};	--	--	GCK domain
gene-LOC110706460	0	0.24	0	5.87	1.28	1.68	0	3	0	69	17	19	0.027	-5.185	2.70303e-05	0.00151792	down	NW_018744970.1	1188556	1189946	+	LOC110706460	--	--	--	--	--	--	--	--
gene-LOC110706469	0.27	0.28	0.38	3.14	2.44	1.64	9	9	11	97	85	49	0.124	-3.007	5.17947e-10	8.65814e-08	down	NW_018742412.1	461354	466619	+	LOC110706469	--	--	uncharacterized protein LOC110706469 [Chenopodium quinoa]	--	SubName: Full=Uncharacterized protein {ECO:0000313|EMBL:KNA07318.1}; Flags: Fragment;	--	--	--
gene-LOC110706473	0.98	1.29	1.06	3.33	3.63	2.77	112	144	106	353	433	283	0.328	-1.606	3.20492e-11	6.98089e-09	down	NW_018744978.1	97044	116813	-	LOC110706473	--	K19984 exocyst complex component 5 | (RefSeq) uncharacterized protein LOC112294431 (A)	formin-like protein 13 isoform X1 [Chenopodium quinoa]	RecName: Full=Formin-like protein 18; Short=AtFH18;	RecName: Full=Formin-like protein {ECO:0000256|RuleBase:RU361260}; Flags: Fragment;	--	GO:0004721,phosphoprotein phosphatase activity	Formin Homology 2 Domain
gene-LOC110706543	3.26	3.91	4.09	0	0	0.03	116	136	128	0	0	1	343.11	8.423	7.41613e-12	1.83349e-09	up	NW_018744988.1	822189	824384	-	LOC110706543	--	--	uncharacterized protein LOC110706543 isoform X1 [Chenopodium quinoa]	--	SubName: Full=Uncharacterized protein {ECO:0000313|EMBL:KNA02738.1}; Flags: Fragment;	--	--	--
gene-LOC110706549	3.62	4.2	3	9.89	12.41	9.3	346	394	253	881	1245	800	0.328	-1.608	4.71694e-10	8.0727e-08	down	NW_018744988.1	865669	871318	+	LOC110706549	--	K14963 COMPASS component SWD3 | (RefSeq) COMPASS-like H3K4 histone methylase component WDR5A (A)	uncharacterized WD repeat-containing protein C2A9.03-like isoform X1 [Chenopodium quinoa]	RecName: Full=Protein Mut11; AltName: Full=Mut11p;	SubName: Full=Uncharacterized protein {ECO:0000313|EMBL:KNA13308.1};	--	GO:0005634,nucleus	WD domain, G-beta repeat
gene-LOC110706555	8.38	8.66	6.52	11.13	22.89	16.31	232	235	159	287	665	406	0.443	-1.174	0.00180433	0.0388076	down	NW_018744988.1	987952	990216	+	LOC110706555	--	K01087 trehalose 6-phosphate phosphatase [EC:3.1.3.12] | (RefSeq) probable trehalose-phosphate phosphatase D (A)	probable trehalose-phosphate phosphatase D [Chenopodium quinoa]	RecName: Full=Probable trehalose-phosphate phosphatase D; Short=AtTPPD; EC=3.1.3.12; AltName: Full=Trehalose 6-phosphate phosphatase;	RecName: Full=Trehalose 6-phosphate phosphatase {ECO:0000256|RuleBase:RU361117}; EC=3.1.3.12 {ECO:0000256|RuleBase:RU361117};	Trehalose-6-phosphate synthase component TPS1 and related subunits	GO:0009507,chloroplast; GO:0015927,trehalase activity; GO:0004805,trehalose-phosphatase activity; GO:0006970,response to osmotic stress; GO:0006979,response to oxidative stress; GO:0009651,response to salt stress; GO:0005992,trehalose biosynthetic process	Trehalose-phosphatase
gene-LOC110706563	0.45	0.95	0.46	1.6	1.66	2.2	21	43	19	69	81	92	0.322	-1.637	0.000191704	0.00735498	down	NW_018744988.1	1142505	1148793	+	LOC110706563	--	K23677 MFS transporter, Spinster family, sphingosine-1-phosphate transporter | (RefSeq) uncharacterized LOC105802280 (A)	uncharacterized protein LOC110706563 [Chenopodium quinoa]	--	SubName: Full=Uncharacterized protein {ECO:0000313|EMBL:KNA22129.1};	Sugar transporter/spinster transmembrane protein	GO:0016021,integral component of membrane; GO:0055085,transmembrane transport	Major Facilitator Superfamily
gene-LOC110706566	1.66	3.56	1.49	10.26	2.87	8.01	38	80	30	219	69	165	0.308	-1.7	0.00122313	0.0296079	down	NW_018744988.1	1164797	1166135	+	LOC110706566	--	K14504 xyloglucan:xyloglucosyl transferase TCH4 [EC:2.4.1.207] | (RefSeq) probable xyloglucan endotransglucosylase/hydrolase protein 23 (A)	probable xyloglucan endotransglucosylase/hydrolase protein 23 [Chenopodium quinoa]	RecName: Full=Probable xyloglucan endotransglucosylase/hydrolase protein 23; Short=At-XTH23; Short=XTH-23; EC=2.4.1.207; Flags: Precursor;	RecName: Full=Xyloglucan endotransglucosylase/hydrolase {ECO:0000256|RuleBase:RU361120}; EC=2.4.1.207 {ECO:0000256|RuleBase:RU361120};	--	GO:0048046,apoplast; GO:0005618,cell wall; GO:0005794,Golgi apparatus; GO:0004553,hydrolase activity, hydrolyzing O-glycosyl compounds; GO:0016762,xyloglucan:xyloglucosyl transferase activity; GO:0042546,cell wall biogenesis; GO:0071555,cell wall organization; GO:0010411,xyloglucan metabolic process	Glycosyl hydrolases family 16
gene-LOC110706591	11.15	7.1	5.26	16.78	19.41	17.17	351	219	146	492	641	486	0.432	-1.209	0.00121168	0.029475	down	NW_018744988.1	1513592	1517984	+	LOC110706591	--	K17506 protein phosphatase 1L [EC:3.1.3.16] | (RefSeq) probable protein phosphatase 2C 10 (A)	probable protein phosphatase 2C 10 [Chenopodium quinoa]	RecName: Full=Probable protein phosphatase 2C 10; Short=AtPP2C10; EC=3.1.3.16;	SubName: Full=Uncharacterized protein {ECO:0000313|EMBL:KNA22160.1};	Serine/threonine protein phosphatase	GO:0005886,plasma membrane; GO:0046872,metal ion binding; GO:0004722,protein serine/threonine phosphatase activity	Protein phosphatase 2C
gene-LOC110706598	0.51	1.75	2.03	0.58	0.09	0.24	26	88	92	28	5	11	4.599	2.201	0.00247471	0.0478466	up	NW_018744988.1	1617067	1619590	-	LOC110706598	--	--	uncharacterized protein LOC110706598 [Chenopodium quinoa]	RecName: Full=Protein WHAT'S THIS FACTOR 1 homolog {ECO:0000305}; Flags: Precursor;	SubName: Full=Uncharacterized protein {ECO:0000313|EMBL:KDP41392.1};	--	GO:0009507,chloroplast; GO:0016787,hydrolase activity; GO:0003723,RNA binding; GO:0000373,Group II intron splicing; GO:0015979,photosynthesis	Plant organelle RNA recognition domain
gene-LOC110706605	17.69	19.27	26.56	8.57	5.96	11.87	645	688	853	291	228	389	2.316	1.212	0.000245264	0.00893996	up	NW_018744988.1	1704488	1707372	-	LOC110706605	--	K21374 7-deoxyloganetin glucosyltransferase [EC:2.4.1.324] | (RefSeq) 7-deoxyloganetin glucosyltransferase (A)	7-deoxyloganetin glucosyltransferase-like [Chenopodium quinoa]	RecName: Full=7-deoxyloganetin glucosyltransferase; EC=2.4.1.324; AltName: Full=Genipin glucosyltransferase; AltName: Full=UDP-glucose glucosyltransferase 2; Short=GjUGT2; AltName: Full=UDP-glycosyltransferase 85A24;	RecName: Full=Glycosyltransferase {ECO:0000256|RuleBase:RU362057}; EC=2.4.1.- {ECO:0000256|RuleBase:RU362057};	UDP-glucuronosyl and UDP-glucosyl transferase	GO:0035251,UDP-glucosyltransferase activity; GO:0008152,metabolic process	UDP-glucoronosyl and UDP-glucosyl transferase
gene-LOC110706610	36.08	20.87	12.84	53.29	53.72	86.55	992	562	311	1364	1549	2139	0.354	-1.497	0.00100572	0.0255806	down	NW_018744988.1	1791045	1792393	-	LOC110706610	--	K00020 3-hydroxyisobutyrate dehydrogenase [EC:1.1.1.31] | (RefSeq) 6-phosphogluconate dehydrogenase-like protein (A)	protein EXORDIUM-like [Chenopodium quinoa]	RecName: Full=Protein EXORDIUM; Flags: Precursor;	SubName: Full=Uncharacterized protein {ECO:0000313|EMBL:KNA15759.1};	--	GO:0048046,apoplast; GO:0005618,cell wall; GO:0005615,extracellular space; GO:0005794,Golgi apparatus; GO:0009505,plant-type cell wall; GO:0009741,response to brassinosteroid	Phosphate-induced protein 1 conserved region
gene-LOC110706612	148.27	150.16	94.96	337.94	306.23	264.68	3768	3737	2126	7996	8162	6047	0.421	-1.247	1.38569e-06	0.000115282	down	NW_018744988.1	1814259	1815505	-	LOC110706612	--	K00020 3-hydroxyisobutyrate dehydrogenase [EC:1.1.1.31] | (RefSeq) 6-phosphogluconate dehydrogenase-like protein (A)	protein EXORDIUM-like [Chenopodium quinoa]	RecName: Full=Protein EXORDIUM; Flags: Precursor;	SubName: Full=Uncharacterized protein {ECO:0000313|EMBL:KNA06183.1};	--	GO:0048046,apoplast; GO:0005618,cell wall; GO:0005615,extracellular space; GO:0005794,Golgi apparatus; GO:0009505,plant-type cell wall; GO:0009741,response to brassinosteroid	Phosphate-induced protein 1 conserved region
gene-LOC110706613	7.89	8.45	6.2	14.89	19	21.64	185	194	128	325	467	456	0.388	-1.367	6.86742e-06	0.000460476	down	NW_018744988.1	1817673	1818822	-	LOC110706613	--	K00020 3-hydroxyisobutyrate dehydrogenase [EC:1.1.1.31] | (RefSeq) 6-phosphogluconate dehydrogenase-like protein (A)	protein EXORDIUM-like [Chenopodium quinoa]	RecName: Full=Protein EXORDIUM; Flags: Precursor;	SubName: Full=Uncharacterized protein {ECO:0000313|EMBL:KNA15759.1};	--	GO:0048046,apoplast; GO:0005618,cell wall; GO:0005615,extracellular space; GO:0005794,Golgi apparatus; GO:0009505,plant-type cell wall; GO:0009741,response to brassinosteroid	Phosphate-induced protein 1 conserved region
gene-LOC110706614	0	0	0	0.8	1.34	1.1	0	0	0	21	40	28	0.006	-7.384	9.35486e-08	1.02818e-05	down	NW_018744988.1	1831819	1833210	+	LOC110706614	--	K00020 3-hydroxyisobutyrate dehydrogenase [EC:1.1.1.31] | (RefSeq) 6-phosphogluconate dehydrogenase-like protein (A)	protein EXORDIUM-like 2 [Chenopodium quinoa]	RecName: Full=Protein EXORDIUM-like 2; Flags: Precursor;	SubName: Full=Uncharacterized protein {ECO:0000313|EMBL:KNA15550.1};	--	GO:0048046,apoplast; GO:0005618,cell wall; GO:0005829,cytosol; GO:0005615,extracellular space; GO:0005794,Golgi apparatus; GO:0009505,plant-type cell wall; GO:0009506,plasmodesma	Phosphate-induced protein 1 conserved region
gene-LOC110706633	16.47	9.36	7.29	21.43	37.49	58.51	336	187	131	407	802	1073	0.273	-1.875	0.000199494	0.00758712	down	NW_018744988.1	2031446	2032446	-	LOC110706633	--	--	uncharacterized protein LOC110706633 [Chenopodium quinoa]	--	SubName: Full=Uncharacterized protein {ECO:0000313|EMBL:KNA12195.1};	--	--	--
gene-LOC110706655	2.28	2.01	2.74	0.06	0.15	0.58	87	75	92	2	6	20	8.436	3.076	3.51079e-05	0.00190027	up	NW_018744988.1	2322675	2325675	-	LOC110706655	--	K00850 6-phosphofructokinase 1 [EC:2.7.1.11] | (RefSeq) ATP-dependent 6-phosphofructokinase 6-like (A)	purine permease 3-like isoform X1 [Chenopodium quinoa]	RecName: Full=Purine permease 3; Short=AtPUP3;	SubName: Full=Uncharacterized protein {ECO:0000313|EMBL:KNA04346.1};	--	GO:0016021,integral component of membrane; GO:0016020,membrane; GO:0005345,purine nucleobase transmembrane transporter activity; GO:0006863,purine nucleobase transport	Purine nucleobase transmembrane transport
gene-LOC110706657	0.12	0	0.2	4.66	3.69	4.99	4	0	6	147	131	152	0.023	-5.451	1.71964e-18	1.01318e-15	down	NW_018744988.1	2337811	2340230	-	LOC110706657	--	K14493 gibberellin receptor GID1 [EC:3.-.-.-] | (RefSeq) gibberellin receptor GID1c-like protein (A)	probable carboxylesterase 18 [Chenopodium quinoa]	RecName: Full=Probable carboxylesterase 18; AltName: Full=AtCXE18; EC=3.1.1.1;	SubName: Full=Uncharacterized protein {ECO:0000313|EMBL:KNA04346.1};	Arylacetamide deacetylase	GO:0052689,carboxylic ester hydrolase activity; GO:0009056,catabolic process; GO:0009860,pollen tube growth	alpha/beta hydrolase fold
gene-LOC110706659	2.99	3.5	5.36	2.43	1.67	1.46	123	141	194	93	72	54	2.074	1.052	0.00236778	0.0464002	up	NW_018744988.1	2352487	2358125	-	LOC110706659	--	K01923 phosphoribosylaminoimidazole-succinocarboxamide synthase [EC:6.3.2.6] | (RefSeq) phosphoribosylaminoimidazole-succinocarboxamide synthase, chloroplastic-like (A)	phosphoribosylaminoimidazole-succinocarboxamide synthase, chloroplastic-like [Chenopodium quinoa]	RecName: Full=Phosphoribosylaminoimidazole-succinocarboxamide synthase, chloroplastic; EC=6.3.2.6; AltName: Full=SAICAR synthetase; Flags: Precursor;	SubName: Full=Uncharacterized protein {ECO:0000313|EMBL:KNA23614.1};	Phosphoribosylamidoimidazole-succinocarboxamide synthase	GO:0009507,chloroplast; GO:0009570,chloroplast stroma; GO:0005524,ATP binding; GO:0004639,phosphoribosylaminoimidazolesuccinocarboxamide synthase activity; GO:0006189,'de novo' IMP biosynthetic process; GO:0009733,response to auxin	SAICAR synthetase
gene-LOC110706676	1.24	1.27	0.63	3.02	4.06	2.39	60	60	27	136	206	104	0.32	-1.645	0.000105019	0.00453105	down	NW_018744988.1	2664148	2667698	+	LOC110706676	--	K18810 cyclin D1/2/4, plant | (RefSeq) cyclin-D4-1-like (A)	cyclin-D4-1-like [Chenopodium quinoa]	RecName: Full=Cyclin-D4-1; AltName: Full=G1/S-specific cyclin-D4-1; Short=CycD4;1;	SubName: Full=Cyclin-D like protein {ECO:0000313|EMBL:CAA71244.1};	G1/S-specific cyclin D	GO:0005634,nucleus; GO:0007049,cell cycle; GO:0051301,cell division	Cyclin, N-terminal domain
gene-LOC110706737	2	6.41	0.67	14.63	14.16	20.5	34	107	10	232	253	314	0.17	-2.557	7.37317e-05	0.00345491	down	NW_018744991.1	2718759	2721210	-	LOC110706737	--	--	uncharacterized protein LOC110706737 [Chenopodium quinoa]	--	SubName: Full=Uncharacterized protein {ECO:0000313|EMBL:KNA20038.1};	--	GO:0016021,integral component of membrane	A2L zinc ribbon domain
gene-LOC110706742	1.12	1.19	1.15	1.88	2.74	2.58	79	82	71	123	202	163	0.458	-1.127	0.000616519	0.0180504	down	NW_018744991.1	153374	157043	+	LOC110706742	--	K15078 structure-specific endonuclease subunit SLX1 [EC:3.6.1.-] | (RefSeq) putative disease resistance protein RGA1 (A)	putative disease resistance protein RGA3 [Chenopodium quinoa]	RecName: Full=Putative disease resistance protein RGA1; AltName: Full=RGA3-blb;	SubName: Full=NBS-LRR type resistance protein {ECO:0000313|EMBL:ABJ99599.1};	Apoptotic ATPase	GO:0043531,ADP binding; GO:0005524,ATP binding; GO:0006952,defense response	NB-ARC domain
gene-LOC110706789	0	0	0.04	0.04	0.28	2.71	0	0	1	1	8	66	0.013	-6.302	0.000712943	0.0200975	down	NW_018744991.1	2981085	2982567	+	LOC110706789	--	K13420 LRR receptor-like serine/threonine-protein kinase FLS2 [EC:2.7.11.1] | (RefSeq) receptor kinase-like protein Xa21 isoform X1 (A)	probable leucine-rich repeat receptor-like protein kinase At1g35710 [Chenopodium quinoa]	RecName: Full=Receptor-like protein Cf-9 {ECO:0000305}; Flags: Precursor;	SubName: Full=Uncharacterized protein {ECO:0000313|EMBL:ESR55510.1}; Flags: Fragment;	FOG: Leucine rich repeat	GO:0016021,integral component of membrane; GO:0005886,plasma membrane; GO:0050832,defense response to fungus; GO:0002238,response to molecule of fungal origin	Leucine rich repeat
gene-LOC110706790	0.07	0.1	0.04	0.33	0.42	3.56	2	3	1	9	13	94	0.046	-4.457	0.00014612	0.00597445	down	NW_018744991.1	2982580	2984022	+	LOC110706790	--	K19613 leucine-rich repeat protein SHOC2 | (RefSeq) hypothetical protein (A)	receptor-like protein 12 [Chenopodium quinoa]	RecName: Full=Receptor-like protein 9DC3 {ECO:0000312|EMBL:AAT77550.1}; Flags: Precursor;	SubName: Full=Uncharacterized protein {ECO:0000313|EMBL:CCB61737.1};	FOG: Leucine rich repeat	GO:0016021,integral component of membrane; GO:0005886,plasma membrane; GO:0050832,defense response to fungus	Leucine rich repeat
gene-LOC110706796	3.03	2.87	2.35	7.41	5.73	3.54	196	182	134	447	389	206	0.487	-1.038	0.00118898	0.0290693	down	NW_018744991.1	13416	19898	-	LOC110706796	--	K14485 transport inhibitor response 1 | (RefSeq) protein TRANSPORT INHIBITOR RESPONSE 1-like (A)	protein TRANSPORT INHIBITOR RESPONSE 1-like [Chenopodium quinoa]	RecName: Full=Protein AUXIN SIGNALING F-BOX 3;	SubName: Full=Uncharacterized protein {ECO:0000313|EMBL:KNA11603.1};	Leucine rich repeat proteins, some proteins contain F-box	GO:0005634,nucleus; GO:0019005,SCF ubiquitin ligase complex; GO:0010011,auxin binding; GO:0000822,inositol hexakisphosphate binding; GO:0009734,auxin-activated signaling pathway; GO:0071249,cellular response to nitrate; GO:0006952,defense response; GO:0048527,lateral root development; GO:0010152,pollen maturation; GO:0080022,primary root development; GO:0016567,protein ubiquitination; GO:0048443,…	Transport inhibitor response 1 protein domain
gene-LOC110706814	1	0.8	0.24	2.12	11.82	16.41	42	33	9	83	520	619	0.063	-3.978	1.06309e-07	1.14737e-05	down	NW_018744991.1	285181	288306	-	LOC110706814	--	--	uncharacterized protein LOC110706814 [Chenopodium quinoa]	--	SubName: Full=Uncharacterized protein {ECO:0000313|EMBL:KMS96794.1};	--	GO:0016021,integral component of membrane	Cotton fibre expressed protein
gene-LOC110706847	1.44	2.59	2.82	0.62	0.63	0.42	50	88	86	20	23	13	3.897	1.962	9.96341e-06	0.000640581	up	NW_018744991.1	897896	902685	+	LOC110706847	--	K16297 serine carboxypeptidase-like clade II [EC:3.4.16.-] | (RefSeq) serine carboxypeptidase-like 31 (A)	serine carboxypeptidase-like 31 [Chenopodium quinoa]	RecName: Full=Serine carboxypeptidase-like 31; EC=3.4.16.-; Flags: Precursor;	RecName: Full=Carboxypeptidase {ECO:0000256|RuleBase:RU361156}; EC=3.4.16.- {ECO:0000256|RuleBase:RU361156};	Serine carboxypeptidases (lysosomal cathepsin A)	GO:0005576,extracellular region; GO:0005773,vacuole; GO:0004185,serine-type carboxypeptidase activity; GO:0051603,proteolysis involved in cellular protein catabolic process	Serine carboxypeptidase
gene-LOC110706917	27.88	19.42	6.89	4.11	4.95	5.05	859	586	187	118	160	140	3.759	1.91	0.00017746	0.00690997	up	NW_018744991.1	1965360	1969081	+	LOC110706917	--	--	uncharacterized protein LOC110706917 [Chenopodium quinoa]	--	SubName: Full=Uncharacterized protein {ECO:0000313|EMBL:KNA08111.1};	--	--	PDDEXK-like family of unknown function
gene-LOC110706996	12.73	23.22	15.81	5.31	5.5	0.78	309	552	338	120	140	17	4.293	2.102	0.000385525	0.0127001	up	NW_018744991.1	3051535	3057943	+	LOC110706996	--	K22757 glutaminyl-peptide cyclotransferase [EC:2.3.2.5] | (RefSeq) glutaminyl-peptide cyclotransferase-like (A)	glutaminyl-peptide cyclotransferase-like [Chenopodium quinoa]	RecName: Full=Glutaminyl-peptide cyclotransferase; EC=2.3.2.5; AltName: Full=Glutaminyl cyclase;	SubName: Full=Uncharacterized protein {ECO:0000313|EMBL:KNA17787.1};	--	GO:0005789,endoplasmic reticulum membrane; GO:0016021,integral component of membrane; GO:0005886,plasma membrane; GO:0016603,glutaminyl-peptide cyclotransferase activity; GO:0017186,peptidyl-pyroglutamic acid biosynthetic process, using glutaminyl-peptide cyclotransferase	Glutamine cyclotransferase
gene-LOC110707046	2.55	3.25	3.9	1.79	1.11	1.38	101	126	136	66	46	49	2.203	1.139	0.000335961	0.0114667	up	NW_018744991.1	3579680	3584621	+	LOC110707046	--	K03027 DNA-directed RNA polymerases I and III subunit RPAC1 | (RefSeq) DNA-directed RNA polymerases I and III subunit rpac1-like (A)	DNA-directed RNA polymerases I and III subunit rpac1-like [Chenopodium quinoa]	RecName: Full=DNA-directed RNA polymerases II, IV and V subunit 3; AltName: Full=DNA-directed RNA polymerase II 36 kDa polypeptide A; AltName: Full=DNA-directed RNA polymerase II subunit RPB3-A; Short=RNA polymerase II subunit 3-A; Short=RNA polymerase II subunit B3-A;	SubName: Full=Uncharacterized protein {ECO:0000313|EMBL:KNA09260.1};	RNA polymerase I and III, subunit RPA40/RPC40	GO:0005737,cytoplasm; GO:0005665,RNA polymerase II, core complex; GO:0000418,RNA polymerase IV complex; GO:0000419,RNA polymerase V complex; GO:0005730,nucleolus; GO:0005634,nucleus; GO:0003677,DNA binding; GO:0003899,DNA-directed 5'-3' RNA polymerase activity; GO:0046983,protein dimerization activity; GO:0010374,stomatal complex development; GO:0010375,stomatal complex patterning; GO:0006366,tra…	RNA polymerase Rpb3/Rpb11 dimerisation domain
gene-LOC110707060	2.43	2.47	2.62	0.75	0.9	1.22	215	214	204	62	84	97	2.501	1.322	4.28256e-05	0.00224694	up	NW_018744991.1	3743919	3748355	+	LOC110707060	--	K00924 kinase [EC:2.7.1.-] | (RefSeq) receptor-like protein kinase HSL1 (A)	LRR receptor-like serine/threonine-protein kinase [Chenopodium quinoa]	RecName: Full=LRR receptor-like serine/threonine-protein kinase {ECO:0000305}; EC=2.7.11.1 {ECO:0000305}; AltName: Full=LRR receptor-like serine/threonine-protein kinase At4g26540 {ECO:0000305}; AltName: Full=Protein RECEPTOR OF RGF1 {ECO:0000303|PubMed:27229311}; AltName: Full=Protein RGF1 INSENSITIVE 3 {ECO:0000303|PubMed:27229312}; Flags: Precursor;	SubName: Full=Uncharacterized protein {ECO:0000313|EMBL:KNA03748.1};	--	GO:0016021,integral component of membrane; GO:0005886,plasma membrane; GO:0005524,ATP binding; GO:0004674,protein serine/threonine kinase activity	Leucine rich repeat
gene-LOC110707091	15.9	8.41	7.55	18.02	45.89	25.86	1066	552	446	1125	3227	1559	0.343	-1.542	0.00158131	0.0353434	down	NW_018744991.1	3668948	3675089	-	LOC110707091	--	--	--	--	--	--	--	--
gene-LOC110707231	6.71	5.13	5.47	8.35	14.55	12.8	302	226	217	350	687	518	0.465	-1.106	0.00189321	0.0399777	down	NW_018744996.1	862789	867603	-	LOC110707231	--	K03797 carboxyl-terminal processing protease [EC:3.4.21.102] | (RefSeq) carboxyl-terminal-processing peptidase 3, chloroplastic-like (A)	carboxyl-terminal-processing peptidase 3, chloroplastic-like [Chenopodium quinoa]	RecName: Full=Carboxyl-terminal-processing peptidase 3, chloroplastic; EC=3.4.21.102; AltName: Full=D1 C-terminal processing protease 3; AltName: Full=Photosystem II D1 protein processing peptidase 3; Flags: Precursor;	SubName: Full=Uncharacterized protein {ECO:0000313|EMBL:KNA04809.1};	--	GO:0009543,chloroplast thylakoid lumen; GO:0016020,membrane; GO:0004175,endopeptidase activity; GO:0008236,serine-type peptidase activity	Peptidase family S41
gene-LOC110707255	3.35	5.11	2.79	9.89	6.73	7.31	109	163	80	300	230	214	0.454	-1.138	8.62006e-05	0.00392655	down	NW_018744996.1	1599287	1603702	-	LOC110707255	--	K22455 estrogen receptor-binding fragment-associated gene 9 protein | (RefSeq) uncharacterized protein At3g61260-like (A)	remorin 4.1-like [Chenopodium quinoa]	RecName: Full=Remorin 4.1 {ECO:0000305}; Short=OsREM4.1 {ECO:0000303|PubMed:17984200}; AltName: Full=Remorin group 4 member 1 {ECO:0000303|PubMed:17984200};	SubName: Full=Uncharacterized protein {ECO:0000313|EMBL:CDP18653.1};	--	GO:0005886,plasma membrane; GO:0009738,abscisic acid-activated signaling pathway; GO:1900458,negative regulation of brassinosteroid mediated signaling pathway	Remorin, C-terminal region
gene-LOC110707264	9.05	7.16	7.84	16.38	19.71	20.59	469	363	358	790	1071	959	0.41	-1.286	3.49104e-06	0.000261486	down	NW_018744996.1	1752421	1756262	+	LOC110707264	--	K13412 calcium-dependent protein kinase [EC:2.7.11.1] | (RefSeq) calcium-dependent protein kinase 20-like (A)	calcium-dependent protein kinase 20-like [Chenopodium quinoa]	RecName: Full=Calcium-dependent protein kinase 32 {ECO:0000303|Ref.5}; EC=2.7.11.1 {ECO:0000305};	SubName: Full=Calcium dependent protein kinase 3 {ECO:0000313|EMBL:AFR11232.1};	Ca2+/calmodulin-dependent protein kinase, EF-Hand protein superfamily	GO:0005737,cytoplasm; GO:0005634,nucleus; GO:0005886,plasma membrane; GO:0009506,plasmodesma; GO:0005524,ATP binding; GO:0005509,calcium ion binding; GO:0004698,calcium-dependent protein kinase C activity; GO:0005516,calmodulin binding; GO:0004683,calmodulin-dependent protein kinase activity; GO:0009738,abscisic acid-activated signaling pathway; GO:0035556,intracellular signal transduction; GO:00…	Protein kinase domain
gene-LOC110707303	1.08	1.97	1.9	0.39	0.44	0.66	42	75	65	14	18	23	3.143	1.652	0.00049938	0.0154989	up	NW_018744996.1	2400298	2406267	-	LOC110707303	--	K19828 mitochondrial GTPase 1 | (RefSeq) short integuments 2, mitochondrial-like (A)	short integuments 2, mitochondrial-like [Chenopodium quinoa]	RecName: Full=Short integuments 2, mitochondrial {ECO:0000303|PubMed:10835408}; AltName: Full=DAR GTPase 1 {ECO:0000303|PubMed:16849600}; Flags: Precursor;	SubName: Full=Uncharacterized protein {ECO:0000313|EMBL:KNA15751.1};	Conserved ATP/GTP binding protein	GO:0009507,chloroplast; GO:0005739,mitochondrion; GO:0005525,GTP binding; GO:0003924,GTPase activity; GO:0042254,ribosome biogenesis	50S ribosome-binding GTPase
gene-LOC110707379	2.84	5.68	6.51	2.84	2.02	2.19	146	286	295	136	109	101	2.04	1.028	0.00227986	0.0452696	up	NW_018744996.1	3619231	3624386	+	LOC110707379	--	K13427 nitric-oxide synthase, plant [EC:1.14.13.39] | (RefSeq) putative nitric oxide synthase (A)	GTP-binding protein BRASSINAZOLE INSENSITIVE PALE GREEN 2, chloroplastic-like [Chenopodium quinoa]	RecName: Full=GTP-binding protein BRASSINAZOLE INSENSITIVE PALE GREEN 2, chloroplastic {ECO:0000303|PubMed:19919572}; Short=Protein BRZ-INSENSITIVE-PALE GREEN 2 {ECO:0000303|PubMed:19919572}; Flags: Precursor;	SubName: Full=Uncharacterized protein {ECO:0000313|EMBL:KNA03281.1};	Predicted GTPases	GO:0009507,chloroplast; GO:0009570,chloroplast stroma; GO:0005739,mitochondrion; GO:0005525,GTP binding; GO:0003924,GTPase activity; GO:0019843,rRNA binding; GO:0009742,brassinosteroid mediated signaling pathway; GO:0009658,chloroplast organization; GO:1901259,chloroplast rRNA processing; GO:0032502,developmental process; GO:1904143,positive regulation of carotenoid biosynthetic process; GO:19023…	50S ribosome-binding GTPase
gene-LOC110707442	0	0	0	4.52	1.98	2.95	0	0	0	73	36	46	0.003	-8.162	5.30524e-10	8.82733e-08	down	NW_018745000.1	7580505	7581903	-	LOC110707442	--	--	--	--	--	--	--	--
gene-LOC110707703	0.28	0.98	0.46	0	0	0	7	24	10	0	0	0	69.367	6.116	0.000154643	0.00622381	up	NW_018742418.1	1282248	1284189	-	LOC110707703	--	K08857 NIMA (never in mitosis gene a)-related kinase 1/4/5 [EC:2.7.11.1] | (RefSeq) serine/threonine-protein kinase Nek6-like (A)	merozoite surface protein 1-like [Chenopodium quinoa]	--	SubName: Full=Uncharacterized protein {ECO:0000313|EMBL:KMS64561.1}; Flags: Fragment;	--	--	Collagen triple helix repeat (20 copies)
gene-LOC110707704	13.69	7.97	7.38	30.04	27.13	22.64	512	292	243	1046	1064	761	0.361	-1.468	2.41587e-05	0.001387	down	NW_018745003.1	495207	501426	+	LOC110707704	--	K14497 protein phosphatase 2C [EC:3.1.3.16] | (RefSeq) probable protein phosphatase 2C 6 (A)	probable protein phosphatase 2C 6 [Chenopodium quinoa]	RecName: Full=Probable protein phosphatase 2C 6; Short=OsPP2C06; EC=3.1.3.16;	SubName: Full=Uncharacterized protein {ECO:0000313|EMBL:KNA07758.1};	Serine/threonine protein phosphatase	GO:0046872,metal ion binding; GO:0004722,protein serine/threonine phosphatase activity	Protein phosphatase 2C
gene-LOC110707773	40.34	20.24	27.33	73.47	78.07	76.4	578	284	345	980	1173	984	0.381	-1.394	8.28015e-05	0.00380062	down	NW_018745003.1	1282147	1283139	+	LOC110707773	--	K10745 ribonuclease H2 subunit C | (RefSeq) uncharacterized protein LOC107416231 (A)	MLP-like protein 34 [Chenopodium quinoa]	RecName: Full=MLP-like protein 31;	SubName: Full=Uncharacterized protein {ECO:0000313|EMBL:KNA19811.1};	--	GO:0006952,defense response; GO:0009607,response to biotic stimulus	Pathogenesis-related protein Bet v I family
gene-LOC110707798	0.85	1.44	0.82	2.19	3.11	3.94	27	45	23	65	104	113	0.316	-1.663	0.000182426	0.00706509	down	NW_018745003.1	1587554	1590236	-	LOC110707798	--	K09419 heat shock transcription factor, other eukaryote | (RefSeq) heat stress transcription factor C-1-like (A)	heat stress transcription factor C-1-like [Chenopodium quinoa]	RecName: Full=Heat stress transcription factor C-1; Short=AtHsfC1; AltName: Full=AtHsf-08;	SubName: Full=Uncharacterized protein {ECO:0000313|EMBL:EEF02983.2};	Heat shock transcription factor	GO:0005634,nucleus; GO:0003700,DNA-binding transcription factor activity; GO:0043565,sequence-specific DNA binding; GO:0006351,transcription, DNA-templated	HSF-type DNA-binding
gene-LOC110707854	2.85	3.33	4.08	1.92	1.05	1.47	104	119	131	65	40	48	2.264	1.179	0.000393818	0.0129023	up	NW_018745003.1	2224855	2230419	-	LOC110707854	--	K03453 bile acid:Na+ symporter, BASS family | (RefSeq) sodium/pyruvate cotransporter BASS2, chloroplastic-like (A)	sodium/pyruvate cotransporter BASS2, chloroplastic-like [Chenopodium quinoa]	RecName: Full=Sodium/pyruvate cotransporter BASS2, chloroplastic; AltName: Full=Bile acid transporter 1; AltName: Full=Bile acid-sodium symporter family protein 2; Flags: Precursor;	SubName: Full=Uncharacterized protein {ECO:0000313|EMBL:KNA11336.1};	Na+-bile acid cotransporter	GO:0009941,chloroplast envelope; GO:0009534,chloroplast thylakoid; GO:0016021,integral component of membrane; GO:0050833,pyruvate transmembrane transporter activity; GO:0006849,plasma membrane pyruvate transport	Sodium Bile acid symporter family
gene-LOC110707934	21.83	36.97	67.3	23.66	9.75	8.95	331	549	899	334	155	122	2.935	1.554	0.00101573	0.0257443	up	NW_018745003.1	3380481	3382570	+	LOC110707934	--	K12845 U4/U6 small nuclear ribonucleoprotein SNU13 | (RefSeq) NHP2-like protein 1 (A)	NHP2-like protein 1 [Chenopodium quinoa]	RecName: Full=H/ACA ribonucleoprotein complex subunit 2-like protein; AltName: Full=Nhp2-like protein;	SubName: Full=Uncharacterized protein {ECO:0000313|EMBL:KNA13578.1};	60S ribosomal protein 15.5kD/SNU13, NHP2/L7A family (includes ribonuclease P subunit p38), involved in splicing	GO:0031429,box H/ACA snoRNP complex; GO:0005730,nucleolus; GO:0005732,small nucleolar ribonucleoprotein complex; GO:0034513,box H/ACA snoRNA binding; GO:0030515,snoRNA binding; GO:0000469,cleavage involved in rRNA processing; GO:0000470,maturation of LSU-rRNA; GO:0031118,rRNA pseudouridine synthesis; GO:0031120,snRNA pseudouridine synthesis; GO:0006412,translation	Ribosomal protein L7Ae/L30e/S12e/Gadd45 family
gene-LOC110708028	26.41	6.92	23.46	4.71	4.29	4.41	892	229	698	148	152	134	4.239	2.084	4.01328e-05	0.00213369	up	NW_018745003.1	4662874	4665279	-	LOC110708028	--	K05278 flavonol synthase [EC:1.14.11.23] | (RefSeq) flavonol synthase/flavanone 3-hydroxylase-like (A)	probable 2-oxoglutarate-dependent dioxygenase ANS [Chenopodium quinoa]	RecName: Full=Probable 2-oxoglutarate-dependent dioxygenase ANS {ECO:0000305}; EC=1.14.11.- {ECO:0000305}; AltName: Full=Anthocyanidin synthase {ECO:0000305};	SubName: Full=Uncharacterized protein {ECO:0000313|EMBL:KNA03710.1};	Iron/ascorbate family oxidoreductases	GO:0005829,cytosol; GO:0051213,dioxygenase activity; GO:0120091,jasmonic acid hydrolase; GO:0046872,metal ion binding; GO:0009813,flavonoid biosynthetic process; GO:2000022,regulation of jasmonic acid mediated signaling pathway	2OG-Fe(II) oxygenase superfamily
gene-LOC110708030	15.5	1.05	17.03	1.03	0.57	1.18	468	31	453	29	18	32	12.255	3.615	8.69754e-06	0.000568344	up	NW_018745003.1	4666618	4668409	-	LOC110708030	--	--	--	--	--	--	--	--
gene-LOC110708031	41.41	19.78	55.77	15.58	10.04	13.31	2724	1274	3232	954	693	787	2.983	1.577	0.00010722	0.00459137	up	NW_018745003.1	4645190	4660754	+	LOC110708031	--	K15227 arogenate dehydrogenase (NADP+), plant [EC:1.3.1.78] | (RefSeq) arogenate dehydrogenase 1, chloroplastic-like (A)	arogenate dehydrogenase 1, chloroplastic-like [Chenopodium quinoa]	RecName: Full=Arogenate dehydrogenase 1, chloroplastic; EC=1.3.1.78; AltName: Full=TYRATC; AltName: Full=TyrAAT1; Flags: Precursor;	SubName: Full=Uncharacterized protein {ECO:0000313|EMBL:OAY31516.1};	Prephenate dehydrogenase (NADP+)	GO:0009507,chloroplast; GO:0033730,arogenate dehydrogenase (NADP+) activity; GO:0008977,prephenate dehydrogenase (NAD+) activity; GO:0004665,prephenate dehydrogenase (NADP+) activity; GO:0006571,tyrosine biosynthetic process	Prephenate dehydrogenase
gene-LOC110708032	11.39	2.84	13.55	4.33	0.5	1.1	438	107	459	155	20	38	4.987	2.318	0.00222989	0.0445978	up	NW_018745003.1	4675563	4678916	-	LOC110708032	--	--	--	--	--	--	--	--
gene-LOC110708043	8.04	9.65	13.03	6.34	3.68	3.48	473	556	675	347	227	184	2.231	1.157	7.21699e-05	0.00340392	up	NW_018745003.1	4771105	4773991	-	LOC110708043	--	K17964 leucine-rich PPR motif-containing protein, mitochondrial | (RefSeq) pentatricopeptide repeat-containing protein At5g61990, mitochondrial (A)	LOW QUALITY PROTEIN: pentatricopeptide repeat-containing protein At3g53700, chloroplastic-like [Chenopodium quinoa]	RecName: Full=Pentatricopeptide repeat-containing protein At3g53700, chloroplastic; AltName: Full=Protein MATERNAL EFFECT EMBRYO ARREST 40; Flags: Precursor;	SubName: Full=Uncharacterized protein {ECO:0000313|EMBL:KNA18849.1};	FOG: PPR repeat	GO:0009507,chloroplast; GO:0004519,endonuclease activity; GO:0003723,RNA binding; GO:0009793,embryo development ending in seed dormancy; GO:0009451,RNA modification	PPR repeat family
gene-LOC110708056	2.92	3.44	2.62	5.06	7.9	10.73	310	357	245	500	879	1023	0.358	-1.483	3.91785e-05	0.00209535	down	NW_018745003.1	4932952	4941534	+	LOC110708056	--	--	uncharacterized protein LOC110708056 [Chenopodium quinoa]	--	SubName: Full=Uncharacterized protein {ECO:0000313|EMBL:KNA24774.1};	--	GO:0016021,integral component of membrane	Tweety
gene-LOC110708066	3	2.46	2.03	7.06	7.06	9.54	87	70	52	191	215	249	0.307	-1.704	5.97525e-07	5.52058e-05	down	NW_018745003.1	5087255	5089669	+	LOC110708066	--	--	uncharacterized protein LOC110708066 [Chenopodium quinoa]	--	SubName: Full=Uncharacterized protein {ECO:0000313|EMBL:KNA09283.1};	--	--	--
gene-LOC110708081	0.63	0.78	0.84	5.65	9.35	6.64	24	29	28	199	371	226	0.099	-3.343	8.98802e-19	5.47508e-16	down	NW_018745003.1	5220271	5224510	+	LOC110708081	--	--	uncharacterized protein LOC110708081 [Chenopodium quinoa]	--	SubName: Full=Uncharacterized protein {ECO:0000313|EMBL:KNA17761.1};	--	--	--
gene-LOC110708193	0.27	0.9	1	1.95	1.76	4.16	10	32	32	66	67	136	0.256	-1.966	0.000913113	0.0239991	down	NW_018742418.1	376742	382191	-	LOC110708193	--	K17500 integrin-linked kinase-associated serine/threonine phosphatase 2C [EC:3.1.3.16] | (RefSeq) WAT1-related protein At3g18200 isoform X1 (A)	WAT1-related protein At1g70260-like [Chenopodium quinoa]	RecName: Full=WAT1-related protein At1g70260;	SubName: Full=Uncharacterized protein {ECO:0000313|EMBL:KNA24456.1};	--	GO:0005783,endoplasmic reticulum; GO:0016021,integral component of membrane; GO:0005886,plasma membrane; GO:0022857,transmembrane transporter activity; GO:1900425,negative regulation of defense response to bacterium; GO:1902289,negative regulation of defense response to oomycetes; GO:1900150,regulation of defense response to fungus	--
gene-LOC110708253	2.41	1.72	1.32	7.6	4.26	2.92	116	81	56	340	215	126	0.372	-1.425	0.00091955	0.0240658	down	NW_018745024.1	1147904	1192723	-	LOC110708253	--	--	--	--	--	--	--	--
gene-LOC110708281	0.91	1.26	0.97	1.66	2.43	2.63	50	68	47	85	140	130	0.442	-1.179	0.00140865	0.0326416	down	NW_018745024.1	2205570	2230175	-	LOC110708281	--	K01613 phosphatidylserine decarboxylase [EC:4.1.1.65] | (RefSeq) phosphatidylserine decarboxylase proenzyme 2-like isoform X1 (A)	phosphatidylserine decarboxylase proenzyme 2-like isoform X1 [Chenopodium quinoa]	RecName: Full=Phosphatidylserine decarboxylase proenzyme 2; EC=4.1.1.65 {ECO:0000255|HAMAP-Rule:MF_03209}; Contains: RecName: Full=Phosphatidylserine decarboxylase 2 beta chain; Contains: RecName: Full=Phosphatidylserine decarboxylase 2 alpha chain;	RecName: Full=Phosphatidylserine decarboxylase proenzyme 2 {ECO:0000256|HAMAP-Rule:MF_03209}; EC=4.1.1.65 {ECO:0000256|HAMAP-Rule:MF_03209}; Contains: RecName: Full=Phosphatidylserine decarboxylase 2 alpha chain {ECO:0000256|HAMAP-Rule:MF_03209}; Contains: RecName: Full=Phosphatidylserine decarboxylase 2 beta chain {ECO:0000256|HAMAP-Rule:MF_03209};	Phosphatidylserine decarboxylase	GO:0009705,plant-type vacuole membrane; GO:0005509,calcium ion binding; GO:0004609,phosphatidylserine decarboxylase activity; GO:0006646,phosphatidylethanolamine biosynthetic process	Phosphatidylserine decarboxylase
gene-LOC110708295	0.64	0.95	0.92	0.15	0.2	0.32	27	39	34	6	9	12	3.525	1.818	0.00182093	0.0389216	up	NW_018745024.1	2633110	2637459	+	LOC110708295	--	--	B3 domain-containing protein REM16-like isoform X1 [Chenopodium quinoa]	RecName: Full=B3 domain-containing protein REM16; AltName: Full=Auxin response factor 36; AltName: Full=Protein REPRODUCTIVE MERISTEM 16;	SubName: Full=Uncharacterized protein {ECO:0000313|EMBL:KNA06326.1};	--	GO:0005634,nucleus; GO:0005773,vacuole; GO:0003677,DNA binding; GO:0006355,regulation of transcription, DNA-templated; GO:0006351,transcription, DNA-templated	B3 DNA binding domain
gene-LOC110708356	55.35	71.66	111.89	38.14	29.2	29.49	2017	2557	3592	1294	1116	966	2.383	1.253	9.67939e-06	0.000623436	up	NW_018745024.1	5217429	5219216	-	LOC110708356	--	--	rubisco accumulation factor 1.1, chloroplastic-like [Chenopodium quinoa]	RecName: Full=Rubisco accumulation factor 1.2, chloroplastic {ECO:0000303|PubMed:22942379}; Flags: Precursor;	SubName: Full=Uncharacterized protein {ECO:0000313|EMBL:KNA12749.1};	--	GO:0009507,chloroplast; GO:0009570,chloroplast stroma; GO:0080158,NA	Rubisco Assembly chaperone C-terminal domain
gene-LOC110708403	1.41	3.1	1.7	1.09	0.54	0.58	75	162	80	54	30	28	2.716	1.441	0.000771561	0.021249	up	NW_018745024.1	6480439	6483556	+	LOC110708403	--	K01051 pectinesterase [EC:3.1.1.11] | (RefSeq) probable pectinesterase/pectinesterase inhibitor 58 (A)	trihelix transcription factor GTL2-like [Chenopodium quinoa]	RecName: Full=Trihelix transcription factor GTL2; AltName: Full=GT2-LIKE protein 2; Short=AtGTL2; AltName: Full=Trihelix DNA-binding protein GTL2;	SubName: Full=Uncharacterized protein {ECO:0000313|EMBL:KNA07962.1};	Transcription factor GT-2 and related proteins, contains trihelix DNA-binding/SANT domain	GO:0005634,nucleus; GO:0005516,calmodulin binding; GO:0003700,DNA-binding transcription factor activity; GO:0001158,enhancer sequence-specific DNA binding; GO:0045893,positive regulation of transcription, DNA-templated; GO:0006355,regulation of transcription, DNA-templated; GO:0006351,transcription, DNA-templated	Myb/SANT-like DNA-binding domain
gene-LOC110708436	16.01	15.04	23.7	63.69	55.44	23.09	263	242	343	974	955	341	0.378	-1.404	0.000434312	0.0139346	down	NW_018745024.1	7132551	7133495	+	LOC110708436	--	K14484 auxin-responsive protein IAA | (RefSeq) auxin-responsive protein IAA4-like isoform X1 (A)	auxin-responsive protein IAA4-like isoform X1 [Chenopodium quinoa]	RecName: Full=Auxin-responsive protein IAA4; AltName: Full=Auxin-induced protein AUX2-11; AltName: Full=Indoleacetic acid-induced protein 4;	RecName: Full=Auxin-responsive protein {ECO:0000256|RuleBase:RU004549}; Flags: Fragment;	--	GO:0005634,nucleus; GO:0003677,DNA binding; GO:0003700,DNA-binding transcription factor activity; GO:0043565,sequence-specific DNA binding; GO:0044212,transcription regulatory region DNA binding; GO:0009734,auxin-activated signaling pathway; GO:0009733,response to auxin; GO:0006351,transcription, DNA-templated	AUX/IAA family
gene-LOC110708517	9.9	23.77	13.73	9.23	4.45	6.06	371	872	453	322	175	204	2.306	1.205	0.000634135	0.0183041	up	NW_018745024.1	8781547	8784448	+	LOC110708517	--	K00088 IMP dehydrogenase [EC:1.1.1.205] | (RefSeq) inosine-5'-monophosphate dehydrogenase 1-like (A)	inosine-5'-monophosphate dehydrogenase 1-like [Chenopodium quinoa]	RecName: Full=Inosine-5'-monophosphate dehydrogenase 1 {ECO:0000255|HAMAP-Rule:MF_03156}; Short=IMP dehydrogenase 1 {ECO:0000255|HAMAP-Rule:MF_03156}; Short=IMPD 1 {ECO:0000255|HAMAP-Rule:MF_03156}; Short=IMPDH 1 {ECO:0000255|HAMAP-Rule:MF_03156}; EC=1.1.1.205 {ECO:0000255|HAMAP-Rule:MF_03156};	RecName: Full=Inosine-5'-monophosphate dehydrogenase {ECO:0000256|RuleBase:RU003928}; EC=1.1.1.205 {ECO:0000256|RuleBase:RU003928};	IMP dehydrogenase/GMP reductase	GO:0005737,cytoplasm; GO:0005829,cytosol; GO:0003938,IMP dehydrogenase activity; GO:0046872,metal ion binding; GO:0006177,GMP biosynthetic process; GO:0006183,GTP biosynthetic process	IMP dehydrogenase / GMP reductase domain
gene-LOC110708542	14.82	21.2	24.32	10.75	7.62	5.29	601	842	869	406	324	193	2.478	1.309	6.6729e-06	0.000449951	up	NW_018745024.1	9183877	9187374	-	LOC110708542	--	K08235 xyloglucan:xyloglucosyl transferase [EC:2.4.1.207] | (RefSeq) probable xyloglucan endotransglucosylase/hydrolase protein 28 (A)	probable xyloglucan endotransglucosylase/hydrolase protein 28 [Chenopodium quinoa]	RecName: Full=Probable xyloglucan endotransglucosylase/hydrolase protein 28; Short=At-XTH28; Short=XTH-28; EC=2.4.1.207; Flags: Precursor;	SubName: Full=Uncharacterized protein {ECO:0000313|EMBL:KNA16770.1};	--	GO:0048046,apoplast; GO:0005618,cell wall; GO:0004553,hydrolase activity, hydrolyzing O-glycosyl compounds; GO:0016762,xyloglucan:xyloglucosyl transferase activity; GO:0042546,cell wall biogenesis; GO:0071555,cell wall organization; GO:0010154,fruit development; GO:0080086,stamen filament development; GO:0010411,xyloglucan metabolic process	Glycosyl hydrolases family 16
gene-LOC110708580	2.75	2.19	2.84	1.36	0.91	1.14	78	61	71	36	27	29	2.244	1.166	0.00255812	0.0489288	up	NW_018745024.1	9882337	9885173	+	LOC110708580	--	--	uncharacterized protein LOC110708580 [Chenopodium quinoa]	--	SubName: Full=Uncharacterized protein {ECO:0000313|EMBL:KNA24530.1};	--	GO:0016021,integral component of membrane; GO:0008168,methyltransferase activity	Methyltransferase domain
gene-LOC110708597	3.2	2.07	2.22	4.64	5.73	5.53	142	90	87	192	267	221	0.458	-1.126	0.00135429	0.0318736	down	NW_018745024.1	10145319	10150787	-	LOC110708597	--	K08145 MFS transporter, SP family, solute carrier family 2 (facilitated glucose transporter), member 8 | (RefSeq) sugar transporter ERD6-like 5 (A)	sugar transporter ERD6-like 5 [Chenopodium quinoa]	RecName: Full=Sugar transporter ERD6-like 5;	SubName: Full=Uncharacterized protein {ECO:0000313|EMBL:KNA18791.1};	Predicted transporter (major facilitator superfamily)	GO:0016021,integral component of membrane; GO:0005355,glucose transmembrane transporter activity; GO:0005351,carbohydrate:proton symporter activity; GO:0046323,glucose import; GO:0035428,NA	Sugar (and other) transporter
gene-LOC110708621	3.67	2.31	1.18	9	14.51	3.48	542	334	154	1239	2251	462	0.261	-1.938	0.000769193	0.0212163	down	NW_018742418.1	1430083	1437633	-	LOC110708621	--	--	--	--	--	--	--	--
gene-LOC110708667	9.12	14.99	10.35	6.19	2.18	1.58	315	507	315	199	79	49	3.449	1.786	0.000104063	0.00451105	up	NW_018745024.1	11042962	11056649	+	LOC110708667	--	K09753 cinnamoyl-CoA reductase [EC:1.2.1.44] | (RefSeq) cinnamoyl-CoA reductase 1-like (A)	cinnamoyl-CoA reductase 1-like [Chenopodium quinoa]	RecName: Full=Tetraketide alpha-pyrone reductase 1; EC=1.1.1.-; AltName: Full=Protein DIHYDROFLAVONOL 4-REDUCTASE-LIKE 1;	SubName: Full=Uncharacterized protein {ECO:0000313|EMBL:KNA11910.1};	Flavonol reductase/cinnamoyl-CoA reductase	GO:0005783,endoplasmic reticulum; GO:0005634,nucleus; GO:0050662,coenzyme binding; GO:0016491,oxidoreductase activity; GO:0009555,pollen development; GO:0010584,pollen exine formation; GO:0048316,seed development; GO:0080110,sporopollenin biosynthetic process	NAD dependent epimerase/dehydratase family
gene-LOC110708716	3.34	1.38	1.08	9.16	11.36	16.17	277	112	79	707	988	1205	0.156	-2.676	1.6169e-07	1.63235e-05	down	NW_018745024.1	11630731	11642886	+	LOC110708716	--	K01115 phospholipase D1/2 [EC:3.1.4.4] | (RefSeq) phospholipase D zeta 1-like (A)	phospholipase D zeta 1-like [Chenopodium quinoa]	RecName: Full=Phospholipase D zeta 1 {ECO:0000303|PubMed:11891260}; Short=PLDzeta1 {ECO:0000303|PubMed:11891260}; EC=3.1.4.4 {ECO:0000269|PubMed:11891260}; AltName: Full=Phospholipase D p1; Short=AtPLDp1; AltName: Full=Phospholipase D1 PHOX and PX-containing domain protein;	RecName: Full=Phospholipase {ECO:0000256|PIRNR:PIRNR009376}; EC=3.1.4.4 {ECO:0000256|PIRNR:PIRNR009376};	Phospholipase D1	GO:0031410,cytoplasmic vesicle; GO:0070290,N-acylphosphatidylethanolamine-specific phospholipase D activity; GO:0035091,phosphatidylinositol binding; GO:0004630,phospholipase D activity; GO:0048017,inositol lipid-mediated signaling; GO:0008610,lipid biosynthetic process; GO:0016042,lipid catabolic process; GO:0006654,phosphatidic acid biosynthetic process; GO:0048364,root development	Phospholipase D Active site motif
gene-LOC110708736	133.68	111.11	139.05	98.37	32.72	42.56	3896	3171	3570	2669	1000	1115	2.235	1.16	0.00206861	0.0423142	up	NW_018745024.1	11824935	11826364	+	LOC110708736	--	K01807 ribose 5-phosphate isomerase A [EC:5.3.1.6] | (RefSeq) probable ribose-5-phosphate isomerase 2 (A)	probable ribose-5-phosphate isomerase 2 [Chenopodium quinoa]	RecName: Full=Probable ribose-5-phosphate isomerase 2; EC=5.3.1.6; AltName: Full=Phosphoriboisomerase 2;	SubName: Full=Uncharacterized protein {ECO:0000313|EMBL:KNA07972.1};	Ribose 5-phosphate isomerase	GO:0005737,cytoplasm; GO:0004751,ribose-5-phosphate isomerase activity; GO:0008219,cell death; GO:0009052,pentose-phosphate shunt, non-oxidative branch; GO:0010228,vegetative to reproductive phase transition of meristem	Ribose 5-phosphate isomerase A (phosphoriboisomerase A)
gene-LOC110708738	0.89	0.76	0.26	7.58	10.48	6.61	31	26	8	247	385	208	0.075	-3.737	5.74708e-15	2.10765e-12	down	NW_018745024.1	11843421	11846281	-	LOC110708738	--	K21989 calcium permeable stress-gated cation channel | (RefSeq) CSC1-like protein RXW8 (A)	protein SAR DEFICIENT 1-like isoform X1 [Chenopodium quinoa]	RecName: Full=Calmodulin-binding protein 60 D {ECO:0000303|PubMed:11782485};	SubName: Full=Uncharacterized protein {ECO:0000313|EMBL:KNA14643.1};	--	GO:0005634,nucleus; GO:0005516,calmodulin binding; GO:0003677,DNA binding; GO:0006355,regulation of transcription, DNA-templated; GO:0006950,response to stress; GO:0006351,transcription, DNA-templated	Calmodulin binding protein-like
gene-LOC110708741	0.14	0.02	0.03	13.53	15.98	18.56	6	1	1	558	742	739	0.004	-8.045	8.79909e-40	2.10826e-36	down	NW_018745024.1	11846742	11852074	-	LOC110708741	--	K21989 calcium permeable stress-gated cation channel | (RefSeq) CSC1-like protein RXW8 (A)	calmodulin-binding protein 60 F-like isoform X1 [Chenopodium quinoa]	RecName: Full=Calmodulin-binding protein 60 B {ECO:0000303|PubMed:11782485};	SubName: Full=Uncharacterized protein {ECO:0000313|EMBL:KMT14293.1};	--	GO:0005634,nucleus; GO:0005516,calmodulin binding; GO:0003677,DNA binding; GO:0006355,regulation of transcription, DNA-templated; GO:0006950,response to stress; GO:0006351,transcription, DNA-templated	Calmodulin binding protein-like
gene-LOC110708742	1.12	0.75	1.43	3.13	2.04	2.61	67	44	75	174	128	140	0.417	-1.262	0.000603029	0.0177938	down	NW_018745024.1	11882468	11893199	-	LOC110708742	--	K21989 calcium permeable stress-gated cation channel | (RefSeq) CSC1-like protein RXW8 (A)	calmodulin-binding protein 60 A-like [Chenopodium quinoa]	RecName: Full=Calmodulin-binding protein 60 D {ECO:0000303|PubMed:11782485};	SubName: Full=Uncharacterized protein {ECO:0000313|EMBL:KNA18488.1};	--	GO:0005634,nucleus; GO:0005516,calmodulin binding; GO:0003677,DNA binding; GO:0006355,regulation of transcription, DNA-templated; GO:0006950,response to stress; GO:0006351,transcription, DNA-templated	Calmodulin binding protein-like
gene-LOC110708777	2.89	3.11	2.35	12.89	18.45	15.79	74	78	53	307	495	363	0.169	-2.562	3.45354e-16	1.49542e-13	down	NW_018745024.1	12171757	12175891	+	LOC110708777	--	--	uncharacterized protein LOC110708777 [Chenopodium quinoa]	--	SubName: Full=Uncharacterized protein {ECO:0000313|EMBL:KNA08376.1};	--	--	--
gene-LOC110708982	0	0	0.08	0.71	1.15	0.41	0	0	2	18	33	10	0.033	-4.924	0.00029551	0.0103113	down	NW_018745024.1	5210872	5212320	+	LOC110708982	--	K17604 zinc finger SWIM domain-containing protein 3 | (RefSeq) uncharacterized LOC108326677 (A)	uncharacterized protein LOC110708982 [Chenopodium quinoa]	--	SubName: Full=uncharacterized protein LOC109000249 {ECO:0000313|RefSeq:XP_018832622.1};	--	--	SWIM zinc finger
gene-LOC110708993	0.79	0.29	0.26	5.18	4.87	3.41	14	5	4	85	90	54	0.1	-3.323	1.83049e-08	2.2843e-06	down	NW_018745024.1	8749280	8750861	-	LOC110708993	--	K10572 inositol-pentakisphosphate 2-kinase [EC:2.7.1.158] | (RefSeq) inositol-pentakisphosphate 2-kinase-like (A)	heavy metal-associated isoprenylated plant protein 39-like [Chenopodium quinoa]	RecName: Full=Heavy metal-associated isoprenylated plant protein 39 {ECO:0000303|PubMed:21072340, ECO:0000303|PubMed:23368984}; Short=AtHIP39 {ECO:0000303|PubMed:21072340, ECO:0000303|PubMed:23368984}; Flags: Precursor;	SubName: Full=Uncharacterized protein {ECO:0000313|EMBL:KNA19478.1};	Copper chaperone	GO:0005737,cytoplasm; GO:0046914,transition metal ion binding; GO:0046916,cellular transition metal ion homeostasis; GO:0030001,metal ion transport	Heavy-metal-associated domain
gene-LOC110709003	38.53	39.65	18.58	66.2	64.71	62.45	779	785	331	1246	1372	1135	0.485	-1.044	0.00190371	0.0401287	down	NW_018742418.1	1939198	1941262	+	LOC110709003	--	K02911 large subunit ribosomal protein L32 | (RefSeq) uncharacterized protein LOC110813134 (A)	uncharacterized protein LOC110709003 [Chenopodium quinoa]	--	SubName: Full=Uncharacterized protein {ECO:0000313|EMBL:CBI28559.3};	--	--	Plant protein 1589 of unknown function (A_thal_3526)
gene-LOC110709065	28.2	20.25	10.67	23.05	88.48	74.8	765	538	255	582	2517	1824	0.301	-1.732	0.00231959	0.0457829	down	NW_018742418.1	1989881	1991211	+	LOC110709065	--	--	F-box/kelch-repeat protein At1g23390-like [Chenopodium quinoa]	RecName: Full=F-box/kelch-repeat protein At1g23390;	SubName: Full=Uncharacterized protein {ECO:0000313|EMBL:KNA08137.1};	--	GO:0005829,cytosol; GO:0005634,nucleus; GO:0043161,proteasome-mediated ubiquitin-dependent protein catabolic process	Kelch motif
gene-LOC110709099	7.51	9.86	10.97	3.73	0.76	0.79	255	328	328	118	27	24	5.463	2.45	1.10065e-05	0.000698894	up	NW_018742418.1	2176097	2187907	+	LOC110709099	--	--	uncharacterized protein LOC110709099 [Chenopodium quinoa]	--	SubName: Full=Uncharacterized protein {ECO:0000313|EMBL:KNA23947.1};	--	--	--
gene-LOC110709102	1.24	1.65	1.43	3.83	2.36	2.44	45	59	46	130	90	80	0.488	-1.036	0.0011391	0.0280598	down	NW_018745030.1	48561	53404	-	LOC110709102	--	K13430 serine/threonine-protein kinase PBS1 [EC:2.7.11.1] | (RefSeq) probable serine/threonine-protein kinase PBL7 (A)	probable serine/threonine-protein kinase PBL7 isoform X1 [Chenopodium quinoa]	RecName: Full=Probable serine/threonine-protein kinase PBL7 {ECO:0000305}; EC=2.7.11.1 {ECO:0000269|PubMed:21855796}; AltName: Full=CDG1-like protein 1 {ECO:0000303|PubMed:21855796}; AltName: Full=PBS1-like protein 7 {ECO:0000303|PubMed:20413097};	SubName: Full=Uncharacterized protein {ECO:0000313|EMBL:KNA23173.1};	Serine/threonine protein kinase	GO:0005886,plasma membrane; GO:0005524,ATP binding; GO:0004675,transmembrane receptor protein serine/threonine kinase activity; GO:0009742,brassinosteroid mediated signaling pathway; GO:0007166,cell surface receptor signaling pathway; GO:1900459,positive regulation of brassinosteroid mediated signaling pathway; GO:0006468,protein phosphorylation	Protein kinase domain
gene-LOC110709131	0	0	0	13.77	16.6	12.87	0	0	0	134	182	121	0.001	-9.667	5.57261e-15	2.06474e-12	down	NW_018745030.1	97261	98280	+	LOC110709131	--	--	--	--	--	--	--	--
gene-LOC110709234	12.4	17.45	16.16	8.35	6.43	7.27	657	905	754	412	357	346	2.009	1.006	1.72011e-08	2.16915e-06	up	NW_018745063.1	738278	740976	+	LOC110709234	--	--	LOW QUALITY PROTEIN: transcription factor TCP4-like [Chenopodium quinoa]	RecName: Full=Transcription factor TCP4; AltName: Full=Protein MATERNAL EFFECT EMBRYO ARREST 35;	SubName: Full=Uncharacterized protein {ECO:0000313|EMBL:KNA22322.1};	--	GO:0005634,nucleus; GO:0003677,DNA binding; GO:0003700,DNA-binding transcription factor activity; GO:0030154,cell differentiation; GO:0048826,cotyledon morphogenesis; GO:0009793,embryo development ending in seed dormancy; GO:0048366,leaf development; GO:0009965,leaf morphogenesis; GO:0045962,positive regulation of development, heterochronic; GO:0006355,regulation of transcription, DNA-templated; …	TCP family transcription factor
gene-LOC110709276	1.69	3.51	2.7	9.7	11.23	10.22	32	65	45	171	223	174	0.239	-2.066	3.77884e-10	6.65743e-08	down	NW_018742418.1	2790173	2794401	-	LOC110709276	--	--	--	--	--	--	--	--
gene-LOC110709368	9	5.93	4.18	8.77	31.14	20.55	580	374	237	526	2104	1190	0.301	-1.732	0.00110666	0.0274489	down	NW_018742418.1	2987413	2993356	+	LOC110709368	--	--	--	--	--	--	--	--
gene-LOC110709416	2.2	0.13	3.61	0.09	0.19	0.05	101	6	146	4	9	2	17.648	4.141	6.56462e-05	0.00315417	up	NW_018745067.1	736487	739029	-	LOC110709416	--	K14300 nuclear pore complex protein Nup133 | (RefSeq) nuclear pore complex protein NUP133 (A)	uncharacterized protein LOC110709416 isoform X1 [Chenopodium quinoa]	--	SubName: Full=Uncharacterized protein {ECO:0000313|EnsemblPlants:PGSC0003DMT400080967};	--	--	Domain of unknown function (DUF4218)
gene-LOC110709432	0.35	0.25	0.55	0	0	0	10	7	14	0	0	0	55.729	5.8	0.000473636	0.0149058	up	NW_018745068.1	1735904	1738002	+	LOC110709432	--	--	TPR repeat-containing protein ZIP4-like [Chenopodium quinoa]	RecName: Full=TPR repeat-containing protein ZIP4 {ECO:0000305}; AltName: Full=Protein SPO22 homolog {ECO:0000305}; Short=AtSPO22 {ECO:0000303|PubMed:17530928}; AltName: Full=Protein ZIP4 homolog {ECO:0000305}; Short=AtZIP4 {ECO:0000303|PubMed:18348867};	SubName: Full=Uncharacterized protein {ECO:0000313|EMBL:KNA21928.1};	Uncharacterized conserved protein	GO:0009507,chloroplast; GO:0005694,chromosome; GO:0005634,nucleus; GO:0007143,female meiotic nuclear division; GO:0007140,male meiotic nuclear division; GO:0000712,resolution of meiotic recombination intermediates; GO:0071139,resolution of recombination intermediates; GO:0007129,synapsis	--
gene-LOC110709457	0.32	0.57	0.32	0	0	0	49	85	43	0	0	0	304.813	8.252	1.9438e-10	3.5643e-08	up	NW_018745068.1	795604	804076	+	LOC110709457	--	--	--	--	--	--	--	--
[truncated: 823 more rows]
