# Supplementary material for: Elucidating the Differentiation Synthesis Mechanisms of Differently Colored Resistance Quinoa Seedings Using Metabolite Profiling and Transcriptome Analysis
Source: Metabolites. 2023 Oct 10;13(10):1065. doi: 10.3390/metabo13101065 (PMC10609267; doi:10.3390/metabo13101065)
Supplement: Supplementary file 1 [file metabolites-13-01065-s001.zip › Table S21.xlsx]

## Sheet: Sheet1
Table S21 4368 new gene functions annotated
gene_id	chr	start	end	strand	KEGG	NR	Swissprot	Tremble	KOG	GO	Pfam
XLOC_028280	NW_018744593.1	2107040	2107398	.	--	--	--	--	--	--	--
XLOC_004907	NW_018742487.1	559896	560397	-	--	receptor-like kinase TMK4 [Chenopodium quinoa]	--	SubName: Full=Uncharacterized protein {ECO:0000313|EMBL:KNA05185.1}; Flags: Fragment;	--	--	Plant transposase (Ptta/En/Spm family)
XLOC_035821	NW_018745311.1	64462	74780	+	--	hypothetical protein BVRB_6g144940 [Beta vulgaris subsp. vulgaris]	--	--	--	--	--
XLOC_024996	NW_018744239.1	2381216	2382325	-	--	--	--	--	--	--	--
XLOC_027567	NW_018744537.1	4685387	4687514	+	K02888 large subunit ribosomal protein L21 | (RefSeq) 50S ribosomal protein L21, mitochondrial (A)	PREDICTED: 50S ribosomal protein L21, mitochondrial [Beta vulgaris subsp. vulgaris]	RecName: Full=50S ribosomal protein L21, mitochondrial {ECO:0000303|PubMed:11675010}; AltName: Full=Protein NUCLEAR FUSION DEFECTIVE 1 {ECO:0000303|PubMed:16698901}; Flags: Precursor;	SubName: Full=Uncharacterized protein {ECO:0000313|EMBL:KNA19736.1}; Flags: Fragment;	Mitochondrial/chloroplast ribosomal L21 protein	GO:0009553,embryo sac development; GO:0043565,sequence-specific DNA binding; GO:0000741,karyogamy; GO:0005840,ribosome; GO:0009555,pollen development; GO:0009567,double fertilization forming a zygote and endosperm; GO:0005739,mitochondrion; GO:0019843,rRNA binding; GO:0003735,structural constituent of ribosome; GO:0010197,polar nucleus fusion; GO:0007338,single fertilization; GO:0006412,translati…	--
XLOC_022239	NW_018743978.1	27307	30939	+	--	miraculin-like [Chenopodium quinoa]	RecName: Full=Miraculin; Short=MIR; Flags: Precursor;	SubName: Full=Uncharacterized protein {ECO:0000313|EMBL:KNA11068.1};	--	GO:0004866,endopeptidase inhibitor activity	--
XLOC_037270	NW_018745454.1	4595491	4596748	-	--	--	--	--	--	--	--
XLOC_021438	NW_018743920.1	5901028	5901619	.	--	uncharacterized protein LOC110693706 isoform X3 [Chenopodium quinoa]	--	SubName: Full=Uncharacterized protein {ECO:0000313|EMBL:KNA07589.1};	--	--	--
XLOC_035135	NW_018745240.1	1907711	1908292	-	K01303 acylaminoacyl-peptidase [EC:3.4.19.1] | (RefSeq) uncharacterized LOC101311565 (A)	uncharacterized protein LOC110724165 isoform X2 [Chenopodium quinoa]	--	SubName: Full=Putative reverse transcriptase domain, Ribonuclease H-like domain protein {ECO:0000313|EMBL:OTG24365.1};	FOG: Transposon-encoded proteins with TYA, reverse transcriptase, integrase domains in various combinations	GO:0003964,RNA-directed DNA polymerase activity; GO:0015074,DNA integration; GO:0003676,nucleic acid binding	--
XLOC_029685	NW_018744662.1	1251721	1252541	.	--	--	--	--	--	--	--
XLOC_006147	NW_018742630.1	3020831	3021677	.	--	--	--	--	--	--	--
XLOC_031865	NW_018744878.1	5543490	5544917	.	--	--	--	--	--	--	--
XLOC_022237	NW_018743977.1	3884331	3885661	.	--	uncharacterized protein LOC110732085 [Chenopodium quinoa]	--	--	--	--	Domain of unknown function (DUF4183)
XLOC_010102	NW_018742951.1	6854335	6854674	.	--	--	--	--	--	--	--
XLOC_016469	NW_018743444.1	1545830	1546033	.	--	--	--	--	--	--	--
XLOC_030176	NW_018744704.1	165620	166231	.	--	--	--	--	--	--	Rhabdovirus M1 matrix protein (M1 polymerase-associated protein)
XLOC_006149	NW_018742630.1	3172408	3172784	.	--	--	--	--	--	--	--
XLOC_028374	NW_018744616.1	2016828	2019316	+	--	uncharacterized protein LOC110691595 isoform X7 [Chenopodium quinoa]	--	--	--	--	--
XLOC_005673	NW_018742597.1	330126	330579	+	--	uncharacterized protein LOC110715887 [Chenopodium quinoa]	--	--	--	--	--
XLOC_023129	NW_018744072.1	2672703	2673228	.	--	--	--	--	--	--	--
XLOC_038583	NW_018745621.1	13495	14091	.	--	hypothetical protein SOVF_119290 [Spinacia oleracea]	--	SubName: Full=Uncharacterized protein {ECO:0000313|EMBL:KNA13162.1};	--	--	--
XLOC_030564	NW_018744752.1	13584	16389	-	--	--	--	--	--	--	--
XLOC_034347	NW_018745080.1	2781603	2782023	.	K17604 zinc finger SWIM domain-containing protein 3 | (RefSeq) uncharacterized LOC101264979 (A)	uncharacterized protein LOC110709403 [Chenopodium quinoa]	--	SubName: Full=Uncharacterized protein {ECO:0000313|EMBL:CAN80287.1};	--	GO:0008270,zinc ion binding	--
XLOC_037972	NW_018745527.1	14094	15441	-	--	metal tolerance protein 10-like isoform X2 [Chenopodium quinoa]	RecName: Full=Metal tolerance protein 9; Short=AtMTP9;	SubName: Full=Uncharacterized protein {ECO:0000313|EMBL:KNA17301.1};	Mitochondrial Fe2+ transporter MMT1 and related transporters (cation diffusion facilitator superfamily)	GO:0016021,integral component of membrane; GO:0008324,cation transmembrane transporter activity; GO:0005774,vacuolar membrane	--
XLOC_017906	NW_018743602.1	137752	138321	.	--	hypothetical protein SOVF_082550 [Spinacia oleracea]	--	SubName: Full=Uncharacterized protein {ECO:0000313|EMBL:KNA17171.1};	--	--	--
XLOC_016246	NW_018743391.1	1713183	1714334	.	--	uncharacterized protein LOC110783276 [Spinacia oleracea]	--	SubName: Full=Uncharacterized protein {ECO:0000313|EMBL:KNA04191.1}; Flags: Fragment;	FOG: Reverse transcriptase	--	--
XLOC_015770	NW_018743352.1	152004	152606	.	K11273 chromosome transmission fidelity protein 1 [EC:3.6.4.13] | (RefSeq) LOW QUALITY PROTEIN: ATP-dependent DNA helicase DDX11 (A)	uncharacterized protein LOC110703359 [Chenopodium quinoa]	--	SubName: Full=Uncharacterized protein {ECO:0000313|EMBL:KRH47035.1, ECO:0000313|EnsemblPlants:GLYMA07G00720.2};	--	--	--
XLOC_001501	NW_018742241.1	146637	147750	.	--	--	--	--	--	--	--
XLOC_030073	NW_018744702.1	2076507	2077240	.	--	--	--	--	--	--	--
XLOC_031699	NW_018744878.1	1477824	1479134	-	--	--	--	--	--	--	--
XLOC_003681	NW_018742418.1	8517568	8518923	-	--	pathogen-related protein-like [Spinacia oleracea]	--	SubName: Full=Uncharacterized protein {ECO:0000313|EMBL:KNA04899.1};	--	--	--
XLOC_034803	NW_018745174.1	2265295	2307952	-	K05542 tRNA-dihydrouridine synthase 1 [EC:1.3.1.88] | (RefSeq) tRNA-dihydrouridine(16/17) synthase [NAD(P)(+)]-like (A)	tRNA-dihydrouridine(16/17) synthase [NAD(P)(+)]	--	SubName: Full=Uncharacterized protein {ECO:0000313|EMBL:KNA04933.1};	tRNA-dihydrouridine synthase	GO:0017150,tRNA dihydrouridine synthase activity; GO:0050660,flavin adenine dinucleotide binding	--
XLOC_027064	NW_018744498.1	1526715	1527503	.	--	uncharacterized protein LOC110686896 isoform X2 [Chenopodium quinoa]	--	--	--	--	--
XLOC_019982	NW_018743850.1	5381769	5382137	.	K00924 kinase [EC:2.7.1.-] | (RefSeq) LOW QUALITY PROTEIN: receptor protein kinase TMK1-like (A)	receptor protein kinase TMK1-like [Chenopodium quinoa]	RecName: Full=Receptor protein kinase TMK1 {ECO:0000303|PubMed:1332795}; EC=2.7.11.1 {ECO:0000269|PubMed:1332795}; AltName: Full=BARK1-like kinase 1 {ECO:0000303|PubMed:23921992}; AltName: Full=Transmembrane kinase 1 {ECO:0000303|PubMed:1332795}; Flags: Precursor;	SubName: Full=Uncharacterized protein {ECO:0000313|EMBL:KNA16989.1};	--	GO:0016021,integral component of membrane; GO:0004675,transmembrane receptor protein serine/threonine kinase activity; GO:0005576,extracellular region; GO:0007165,signal transduction; GO:0005886,plasma membrane; GO:0005524,ATP binding	Leucine rich repeat
XLOC_014372	NW_018743285.1	744100	752208	-	K14857 AdoMet-dependent rRNA methyltransferase SPB1 [EC:2.1.1.-] | (RefSeq) putative rRNA methyltransferase (A)	uncharacterized protein LOC110695723 [Chenopodium quinoa]	--	SubName: Full=Uncharacterized protein {ECO:0000313|EMBL:CCA65997.1};	FOG: Reverse transcriptase	GO:0004523,RNA-DNA hybrid ribonuclease activity; GO:0003676,nucleic acid binding	Reverse transcriptase-like
XLOC_011452	NW_018743050.1	3412468	3413012	.	K02635 cytochrome b6 | (RefSeq) petB, CDC77_pgp033; PetB (A)	PetB (chloroplast) [Chenopodium album]	RecName: Full=Cytochrome b6 {ECO:0000255|HAMAP-Rule:MF_00633};	RecName: Full=Cytochrome b6 {ECO:0000256|RuleBase:RU003291};	Cytochrome b	GO:0009535,chloroplast thylakoid membrane; GO:0020037,heme binding; GO:0016021,integral component of membrane; GO:0045158,electron transporter, transferring electrons within cytochrome b6/f complex of photosystem II activity; GO:0022904,respiratory electron transport chain; GO:0005506,iron ion binding; GO:0015979,photosynthesis	--
XLOC_034349	NW_018745080.1	3715597	3715956	.	K13448 calcium-binding protein CML | (RefSeq) putative calcium-binding protein CML19 (A)	hypothetical protein BVRB_1g006140 [Beta vulgaris subsp. vulgaris]	RecName: Full=Calmodulin-like protein 5; AltName: Full=Protein MULTICOPY SUPPRESSORS OF SNF4 DEFICIENCY IN YEAST 3;	SubName: Full=Uncharacterized protein {ECO:0000313|EMBL:KNA07299.1};	Calmodulin and related proteins (EF-Hand superfamily)	GO:0005509,calcium ion binding; GO:0031303,integral component of endosome membrane; GO:0012505,endomembrane system	--
XLOC_016747	NW_018743510.1	252722	254931	-	K12447 UDP-sugar pyrophosphorylase [EC:2.7.7.64] | (RefSeq) UDP-sugar pyrophosphorylase-like isoform X1 (A)	PREDICTED: uncharacterized protein LOC104646029 [Solanum lycopersicum]	RecName: Full=Retrovirus-related Pol polyprotein from transposon RE2; AltName: Full=Retro element 2 {ECO:0000303|PubMed:10689195}; Short=AtRE2 {ECO:0000303|PubMed:10689195}; Includes: RecName: Full=Protease RE2; EC=3.4.23.-; Includes: RecName: Full=Reverse transcriptase RE2; EC=2.7.7.49; Includes: RecName: Full=Endonuclease RE2;	SubName: Full=Putative ribonuclease H-like domain, GAG-pre-integrase domain, Gag-polypeptide of LTR copia-type {ECO:0000313|EMBL:OTG08979.1};	FOG: Transposon-encoded proteins with TYA, reverse transcriptase, integrase domains in various combinations	GO:0006310,DNA recombination; GO:0004519,endonuclease activity; GO:0015074,DNA integration; GO:0004190,aspartic-type endopeptidase activity; GO:0003676,nucleic acid binding; GO:0003964,RNA-directed DNA polymerase activity; GO:0046872,metal ion binding	--
XLOC_038141	NW_018745533.1	3477582	3477960	.	--	--	--	--	--	--	--
XLOC_021788	NW_018743955.1	5827569	5828320	+	--	--	--	--	--	--	--
XLOC_037959	NW_018745523.1	1521202	1521704	.	--	--	--	--	--	--	--
XLOC_026976	NW_018744472.1	69041	69486	.	--	--	--	--	--	--	--
XLOC_012818	NW_018743196.1	2465303	2465531	.	--	--	--	--	--	--	--
XLOC_029151	NW_018744633.1	1277472	1278087	-	--	--	--	--	--	--	--
XLOC_003758	NW_018742418.1	5558204	5558448	.	--	--	--	--	--	--	--
XLOC_013217	NW_018743199.1	3180358	3182300	.	--	--	--	--	--	--	--
XLOC_037631	NW_018745470.1	1263397	1264487	-	--	--	--	--	--	--	--
XLOC_013755	NW_018743212.1	557174	557511	.	K14677 aminoacylase [EC:3.5.1.14] | (RefSeq) uncharacterized protein LOC107892630 (A)	uncharacterized protein LOC110792038 [Spinacia oleracea]	--	SubName: Full=Uncharacterized protein {ECO:0000313|EMBL:CCA66040.1};	FOG: Reverse transcriptase	GO:0003676,nucleic acid binding	--
XLOC_018527	NW_018743691.1	3518099	3523266	-	--	hypothetical protein BVRB_019550, partial [Beta vulgaris subsp. vulgaris]	--	SubName: Full=Uncharacterized protein {ECO:0000313|EMBL:KMS64509.1}; Flags: Fragment;	--	GO:0008270,zinc ion binding	GRF zinc finger
XLOC_004408	NW_018742461.1	2527951	2528652	.	--	putative disease resistance protein RGA4 [Chenopodium quinoa]	--	SubName: Full=Uncharacterized protein {ECO:0000313|EMBL:KNA05687.1};	--	--	--
XLOC_028055	NW_018744582.1	2240110	2241026	.	--	--	--	--	--	--	--
XLOC_037957	NW_018745523.1	1214533	1215014	.	K17086 transmembrane 9 superfamily member 2/4 | (RefSeq) uncharacterized LOC101300290 (A)	uncharacterized protein LOC110735913 [Chenopodium quinoa]	--	SubName: Full=Uncharacterized protein {ECO:0000313|EMBL:CAN83825.1};	--	--	--
XLOC_010182	NW_018742963.1	1792629	1793435	+	--	--	--	--	--	--	--
XLOC_030999	NW_018744835.1	1349219	1349602	.	K03245 translation initiation factor 3 subunit J | (RefSeq) uncharacterized protein LOC110681914 (A)	uncharacterized protein LOC110696814 [Chenopodium quinoa]	--	SubName: Full=Uncharacterized protein {ECO:0000313|EMBL:CAN78026.1};	FOG: Transposon-encoded proteins with TYA, reverse transcriptase, integrase domains in various combinations	GO:0015074,DNA integration; GO:0003676,nucleic acid binding	--
XLOC_011084	NW_018743021.1	3238788	3239427	-	K17604 zinc finger SWIM domain-containing protein 3 | (RefSeq) protein FAR1-RELATED SEQUENCE 5-like (A)	protein FAR1-RELATED SEQUENCE 5-like [Chenopodium quinoa]	--	SubName: Full=Uncharacterized protein {ECO:0000313|EnsemblPlants:TRIAE_CS42_2BL_TGACv1_130617_AA0414800.1};	--	GO:0006355,regulation of transcription, DNA-templated; GO:0008270,zinc ion binding	--
XLOC_036215	NW_018745388.1	114090	114806	.	K19984 exocyst complex component 5 | (RefSeq) uncharacterized protein LOC113272286 (A)	zinc finger BED domain-containing protein RICESLEEPER 2-like [Chenopodium quinoa]	RecName: Full=Putative AC transposase; AltName: Full=ORFA;	SubName: Full=Uncharacterized protein {ECO:0000313|EMBL:EMJ14584.1};	Tam3-transposase (Ac family)	GO:0006310,DNA recombination; GO:0046983,protein dimerization activity; GO:0032196,transposition; GO:0003677,DNA binding	--
XLOC_018151	NW_018743649.1	210435	210763	.	--	--	--	--	--	--	--
XLOC_038287	NW_018745566.1	671430	672507	.	--	uncharacterized protein LOC110729962 [Chenopodium quinoa]	--	--	--	--	--
XLOC_017768	NW_018743574.1	4038744	4039281	.	--	--	--	--	--	--	--
XLOC_031442	NW_018744874.1	672923	673293	.	--	--	--	--	--	--	--
XLOC_035824	NW_018745311.1	841578	842770	+	--	--	--	--	--	--	--
XLOC_032804	NW_018744996.1	3826167	3827477	-	--	PREDICTED: uncharacterized protein LOC104891162 [Beta vulgaris subsp. vulgaris]	--	--	--	--	GAG-pre-integrase domain
XLOC_009140	NW_018742899.1	2389467	2393335	+	K19984 exocyst complex component 5 | (RefSeq) uncharacterized protein LOC113272286 (A)	zinc finger BED domain-containing protein RICESLEEPER 2-like [Chenopodium quinoa]	RecName: Full=Putative AC transposase; AltName: Full=ORFA;	SubName: Full=Uncharacterized protein {ECO:0000313|EMBL:KNA05978.1}; Flags: Fragment;	Tam3-transposase (Ac family)	GO:0006310,DNA recombination; GO:0046983,protein dimerization activity; GO:0032196,transposition; GO:0003677,DNA binding	Exocyst component 84 C-terminal
XLOC_028113	NW_018744592.1	1	2404	-	K23280 rhamnogalacturonan I rhamnosyltransferase [EC:2.4.1.351] | (RefSeq) uncharacterized protein LOC101257103 isoform X1 (A)	uncharacterized protein LOC110720366 isoform X2 [Chenopodium quinoa]	--	SubName: Full=Uncharacterized protein {ECO:0000313|EMBL:CAN74847.1};	FOG: Transposon-encoded proteins with TYA, reverse transcriptase, integrase domains in various combinations	GO:0015074,DNA integration; GO:0003676,nucleic acid binding	GAG-pre-integrase domain
XLOC_020309	NW_018743894.1	60723	61783	-	--	--	--	--	--	--	--
XLOC_001298	NW_018742205.1	6524375	6526211	.	K12447 UDP-sugar pyrophosphorylase [EC:2.7.7.64] | (RefSeq) UDP-sugar pyrophosphorylase-like isoform X1 (A)	PREDICTED: LOW QUALITY PROTEIN: uncharacterized protein LOC107027526 [Solanum pennellii]	--	SubName: Full=Putative ribonuclease H-like domain-containing protein {ECO:0000313|EMBL:OTF86030.1};	FOG: Transposon-encoded proteins with TYA, reverse transcriptase, integrase domains in various combinations	GO:0015074,DNA integration; GO:0003676,nucleic acid binding	--
XLOC_020346	NW_018743894.1	3357676	3358534	.	--	--	--	--	--	--	--
XLOC_022319	NW_018743979.1	4124607	4125701	.	K00799 glutathione S-transferase [EC:2.5.1.18] | (RefSeq) uncharacterized protein LOC110786294 (A)	uncharacterized protein LOC110776679 [Spinacia oleracea]	--	SubName: Full=Uncharacterized protein {ECO:0000313|EMBL:CCA66040.1};	FOG: Reverse transcriptase	GO:0003676,nucleic acid binding	--
XLOC_033285	NW_018745003.1	4923966	4925154	-	--	probably inactive leucine-rich repeat receptor-like protein kinase At2g25790 [Chenopodium quinoa]	--	--	--	--	--
XLOC_014265	NW_018743284.1	152440	152906	-	--	--	--	--	--	--	--
XLOC_001504	NW_018742241.1	384845	385142	.	--	--	--	--	--	--	--
XLOC_007445	NW_018742738.1	8288028	8289116	-	--	--	--	--	--	--	--
XLOC_007168	NW_018742733.1	50929	51828	-	--	PREDICTED: uncharacterized protein LOC104907245 [Beta vulgaris subsp. vulgaris]	--	SubName: Full=Uncharacterized protein {ECO:0000313|EMBL:KMS98371.1};	--	--	--
XLOC_025742	NW_018744301.1	5009930	5010975	-	--	--	--	--	--	--	--
XLOC_007315	NW_018742733.1	2820555	2822518	.	--	hypothetical protein BVRB_000780 [Beta vulgaris subsp. vulgaris]	--	SubName: Full=Uncharacterized protein {ECO:0000313|EMBL:KMS96273.1};	--	GO:0016021,integral component of membrane	--
XLOC_021708	NW_018743946.1	2344728	2345315	.	--	--	--	--	--	--	--
XLOC_029759	NW_018744693.1	276646	277735	+	--	--	--	--	--	--	--
XLOC_012065	NW_018743108.1	1554030	1563823	+	--	--	--	--	--	--	--
XLOC_030561	NW_018744745.1	2155461	2156171	.	--	--	--	--	--	--	--
XLOC_021690	NW_018743946.1	2770488	2774297	-	--	uncharacterized protein LOC110719501 [Chenopodium quinoa]	--	--	--	--	--
XLOC_015344	NW_018743292.1	10983847	10984385	.	--	protein FAR1-RELATED SEQUENCE 6-like [Chenopodium quinoa]	--	--	--	--	--
XLOC_038436	NW_018745587.1	470437	471007	-	K13366 polyamine oxidase [EC:1.5.3.14 1.5.3.16 1.5.3.-] | (RefSeq) polyamine oxidase-like (A)	polyamine oxidase-like [Chenopodium quinoa]	--	--	--	--	Domain of unknown function (DUF4666)
XLOC_007512	NW_018742738.1	4263104	4263531	.	--	--	--	--	--	--	--
XLOC_000893	NW_018742205.1	1814053	1814774	+	--	hypothetical protein SOVF_006450 [Spinacia oleracea]	--	SubName: Full=Uncharacterized protein {ECO:0000313|EMBL:KNA25480.1};	--	--	--
XLOC_036151	NW_018745333.1	59352	59898	.	K22378 E3 ubiquitin-protein ligase RNF181 [EC:2.3.2.27] | (RefSeq) RING-H2 finger protein ATL73-like (A)	probable E3 ubiquitin-protein ligase RHB1A [Spinacia oleracea]	RecName: Full=Probable E3 ubiquitin-protein ligase RHB1A {ECO:0000305}; EC=2.3.2.27; AltName: Full=RING-H2 finger B1a {ECO:0000303|PubMed:9781696}; AltName: Full=RING-H2 zinc finger protein RHB1a {ECO:0000305}; AltName: Full=RING-type E3 ubiquitin transferase RHB1A {ECO:0000305};	SubName: Full=Uncharacterized protein {ECO:0000313|EMBL:KNA09229.1};	FOG: Predicted E3 ubiquitin ligase	GO:0016567,protein ubiquitination; GO:0016740,transferase activity; GO:0046872,metal ion binding	--
XLOC_022317	NW_018743979.1	3669648	3670112	.	--	uncharacterized protein LOC110693593 [Chenopodium quinoa]	--	SubName: Full=Uncharacterized protein {ECO:0000313|EMBL:KNA15804.1};	--	--	No apical meristem-associated C-terminal domain
XLOC_008272	NW_018742815.1	3127846	3129201	+	--	--	--	--	--	--	--
XLOC_006422	NW_018742681.1	4987143	4987643	+	--	--	--	--	--	--	--
XLOC_022993	NW_018744066.1	1634592	1635104	.	--	--	--	--	--	--	--
XLOC_008553	NW_018742817.1	1058352	1058768	.	--	--	--	--	--	--	--
XLOC_027328	NW_018744502.1	3936212	3936763	.	K19984 exocyst complex component 5 | (RefSeq) uncharacterized protein LOC113272286 (A)	zinc finger BED domain-containing protein RICESLEEPER 2-like [Chenopodium quinoa]	RecName: Full=Zinc finger BED domain-containing protein RICESLEEPER 4; AltName: Full=Transposase-like protein RICESLEEPER 4;	SubName: Full=Uncharacterized protein {ECO:0000313|EMBL:KMS99565.1};	Tam3-transposase (Ac family)	GO:0003700,DNA-binding transcription factor activity; GO:0005634,nucleus; GO:0009791,post-embryonic development; GO:0006357,regulation of transcription by RNA polymerase II; GO:0000977,RNA polymerase II regulatory region sequence-specific DNA binding; GO:0046983,protein dimerization activity; GO:0046872,metal ion binding; GO:0006351,transcription, DNA-templated	--
XLOC_010612	NW_018742987.1	1249425	1250662	+	--	hypothetical protein SOVF_007280 [Spinacia oleracea]	--	SubName: Full=Uncharacterized protein {ECO:0000313|EMBL:KNA25361.1};	--	--	--
XLOC_004862	NW_018742484.1	2907277	2907778	.	--	predicted protein [Arabidopsis lyrata subsp. lyrata]	--	SubName: Full=Predicted protein {ECO:0000313|EMBL:EFH44736.1};	--	--	--
XLOC_000820	NW_018742204.1	20705263	20705537	.	K17604 zinc finger SWIM domain-containing protein 3 | (RefSeq) protein FAR1-RELATED SEQUENCE 8 (A)	protein FAR1-RELATED SEQUENCE 5-like [Chenopodium quinoa]	RecName: Full=Protein FAR1-RELATED SEQUENCE 5;	SubName: Full=Uncharacterized protein {ECO:0000313|EMBL:KEH19649.1, ECO:0000313|EnsemblPlants:KEH19649};	--	GO:0006355,regulation of transcription, DNA-templated; GO:0005634,nucleus; GO:0008270,zinc ion binding	--
XLOC_014906	NW_018743292.1	1582267	1583711	-	--	--	--	--	--	--	--
XLOC_038784	NW_018745651.1	191244	191551	.	--	--	--	--	--	--	--
XLOC_016860	NW_018743514.1	1175432	1176660	.	--	uncharacterized protein LOC110784800 [Spinacia oleracea]	--	SubName: Full=Uncharacterized protein {ECO:0000313|EMBL:CCA66020.1};	--	GO:0003676,nucleic acid binding	--
XLOC_037667	NW_018745482.1	7646	10360	-	K19199 histone-lysine N-methyltransferase SETD3 [EC:2.1.1.43] | (RefSeq) uncharacterized protein LOC110684701 (A)	uncharacterized protein LOC110691956 [Chenopodium quinoa]	--	--	--	--	--
XLOC_027152	NW_018744501.1	1316893	1317576	.	--	uncharacterized protein LOC110686644 [Chenopodium quinoa]	--	SubName: Full=Uncharacterized protein {ECO:0000313|EMBL:ACY01933.1};	FOG: Transposon-encoded proteins with TYA, reverse transcriptase, integrase domains in various combinations	--	ATHILA ORF-1 family
XLOC_016658	NW_018743503.1	70485	71793	.	--	putative disease resistance protein RGA1 [Chenopodium quinoa]	--	--	--	--	--
XLOC_034810	NW_018745174.1	1285270	1285780	.	--	hypothetical protein BVRB_3g062810 [Beta vulgaris subsp. vulgaris]	--	--	--	--	--
XLOC_008723	NW_018742879.1	2209647	2211127	+	--	uncharacterized protein LOC110798719 [Spinacia oleracea]	--	SubName: Full=Uncharacterized protein {ECO:0000313|EMBL:KNA21107.1};	--	--	--
XLOC_006709	NW_018742684.1	513296	513852	.	--	uncharacterized protein LOC110715520 [Chenopodium quinoa]	--	SubName: Full=Uncharacterized protein {ECO:0000313|EMBL:KMT08054.1};	--	--	--
XLOC_017138	NW_018743555.1	786685	787144	.	--	--	--	--	--	--	--
XLOC_030537	NW_018744745.1	946195	947140	-	--	zinc finger A20 and AN1 domain-containing stress-associated protein 7-like [Chenopodium quinoa]	--	--	--	--	--
XLOC_007488	NW_018742738.1	14090973	14097960	-	--	--	--	--	--	--	--
XLOC_016784	NW_018743510.1	4140004	4144137	-	--	--	--	--	--	--	--
XLOC_017827	NW_018743591.1	365962	366763	.	--	--	--	--	--	--	--
XLOC_028180	NW_018744593.1	4889941	4892332	+	--	--	--	--	--	--	--
XLOC_021597	NW_018743942.1	925827	926401	.	--	--	--	--	--	--	--
XLOC_015622	NW_018743331.1	2993002	2996432	-	--	uncharacterized protein LOC110686904 [Chenopodium quinoa]	--	SubName: Full=Uncharacterized protein {ECO:0000313|EMBL:KNA19204.1};	--	--	--
XLOC_009864	NW_018742914.1	3325806	3326421	.	--	--	--	--	--	--	--
XLOC_027037	NW_018744497.1	1298863	1299351	.	K02111 F-type H+/Na+-transporting ATPase subunit alpha [EC:7.1.2.2 7.2.2.1] | (RefSeq) atpA, CDC77_pgp079; AtpA (A)	ATP synthase CF1 alpha chain (plastid) [Chenopodium album]	RecName: Full=ATP synthase subunit alpha, chloroplastic {ECO:0000255|HAMAP-Rule:MF_01346}; EC=3.6.3.14 {ECO:0000255|HAMAP-Rule:MF_01346}; AltName: Full=ATP synthase F1 sector subunit alpha {ECO:0000255|HAMAP-Rule:MF_01346}; AltName: Full=F-ATPase subunit alpha {ECO:0000255|HAMAP-Rule:MF_01346};	RecName: Full=ATP synthase subunit alpha {ECO:0000256|RuleBase:RU003551};	F0F1-type ATP synthase, alpha subunit	GO:0009535,chloroplast thylakoid membrane; GO:0045261,proton-transporting ATP synthase complex, catalytic core F(1); GO:0015986,ATP synthesis coupled proton transport; GO:0005524,ATP binding; GO:0046933,proton-transporting ATP synthase activity, rotational mechanism	--
XLOC_032806	NW_018744996.1	199638	200990	.	K01188 beta-glucosidase [EC:3.2.1.21] | (RefSeq) beta-glucosidase 12-like (A)	polygalacturonase inhibitor 1-like, partial [Spinacia oleracea]	RecName: Full=Polygalacturonase inhibitor; AltName: Full=Polygalacturonase-inhibiting protein; Short=PGIG; Flags: Precursor;	SubName: Full=Uncharacterized protein {ECO:0000313|EMBL:KNA07128.1}; Flags: Fragment;	--	GO:0048046,apoplast; GO:0005618,cell wall	Leucine Rich repeats (2 copies)
XLOC_002035	NW_018742292.1	410850	416663	-	--	uncharacterized protein LOC110712326 [Chenopodium quinoa]	--	SubName: Full=Uncharacterized protein {ECO:0000313|EMBL:CCA66020.1};	--	GO:0003676,nucleic acid binding	--
XLOC_030816	NW_018744821.1	2539996	2540893	.	--	hypothetical protein BVRB_3g060040 [Beta vulgaris subsp. vulgaris]	--	SubName: Full=Uncharacterized protein {ECO:0000313|EMBL:KNA15732.1};	--	--	--
XLOC_036620	NW_018745435.1	3664	4765	.	--	--	--	--	--	--	--
XLOC_027163	NW_018744502.1	1480782	1482100	+	--	uncharacterized protein LOC110728682 [Chenopodium quinoa]	--	--	--	--	--
XLOC_008526	NW_018742817.1	886218	887122	-	--	--	--	--	--	--	--
XLOC_012857	NW_018743197.1	374724	374992	.	--	--	--	--	--	--	--
XLOC_027858	NW_018744582.1	326590	330288	+	K07409 cytochrome P450 family 1 subfamily A polypeptide 2 [EC:1.14.14.1] | (RefSeq) cytochrome P450 77A3-like (A)	uncharacterized protein LOC110694357 [Chenopodium quinoa]	RecName: Full=Cytochrome P450 89A2; EC=1.14.-.-; AltName: Full=ATH 6-1; AltName: Full=CYPLXXXIX;	SubName: Full=Integrase {ECO:0000313|EMBL:ABM55238.1};	Cytochrome P450 CYP2 subfamily	GO:0020037,heme binding; GO:0016709,oxidoreductase activity, acting on paired donors, with incorporation or reduction of molecular oxygen, NAD(P)H as one donor, and incorporation of one atom of oxygen; GO:0044550,secondary metabolite biosynthetic process; GO:0016021,integral component of membrane; GO:0016020,membrane; GO:0005506,iron ion binding	Cytochrome P450
XLOC_000848	NW_018742205.1	489720	493393	+	--	protein RESPONSE TO LOW SULFUR 3-like [Chenopodium quinoa]	RecName: Full=Protein RESPONSE TO LOW SULFUR 3 {ECO:0000303|PubMed:25628631};	SubName: Full=Uncharacterized protein {ECO:0000313|EMBL:KNA10592.1};	--	--	--
XLOC_035168	NW_018745248.1	2192373	2195285	+	--	uncharacterized protein LOC110784800 [Spinacia oleracea]	--	SubName: Full=Uncharacterized protein {ECO:0000313|EMBL:KNA16570.1};	FOG: Reverse transcriptase	GO:0008270,zinc ion binding; GO:0003676,nucleic acid binding	Zinc knuckle
XLOC_027340	NW_018744502.1	7270692	7271722	.	K12874 intron-binding protein aquarius | (RefSeq) LOW QUALITY PROTEIN: intron-binding protein aquarius-like (A)	uncharacterized protein LOC110797061 [Spinacia oleracea]	--	SubName: Full=Uncharacterized protein {ECO:0000313|EMBL:JAU33594.1}; Flags: Fragment;	FOG: Reverse transcriptase	--	Reverse transcriptase (RNA-dependent DNA polymerase)
XLOC_037636	NW_018745470.1	1874020	1875541	-	--	--	--	--	--	--	--
XLOC_028873	NW_018744626.1	5515101	5516703	-	--	uncharacterized protein LOC110700666 [Chenopodium quinoa]	--	--	--	--	--
XLOC_025102	NW_018744239.1	10364524	10370542	-	--	--	--	--	--	--	--
XLOC_004853	NW_018742484.1	2078667	2079235	.	--	--	--	--	--	--	--
XLOC_025913	NW_018744304.1	2110749	2111341	.	--	--	--	--	--	--	--
XLOC_022063	NW_018743977.1	415457	416459	+	--	--	--	--	--	--	--
XLOC_036053	NW_018745323.1	3192615	3193496	.	--	hypothetical protein BVRB_2g047260 [Beta vulgaris subsp. vulgaris]	--	SubName: Full=Uncharacterized protein {ECO:0000313|EMBL:KMS99167.1};	--	--	--
XLOC_039302	NW_018745684.1	3270864	3275510	-	--	uncharacterized protein LOC110788901 [Spinacia oleracea]	--	SubName: Full=Uncharacterized protein {ECO:0000313|EMBL:KNA06919.1};	--	GO:0009642,response to light intensity	--
XLOC_027066	NW_018744498.1	1664290	1664518	.	K00924 kinase [EC:2.7.1.-] | (RefSeq) receptor protein kinase CLAVATA1-like (A)	uncharacterized protein LOC110695865 [Chenopodium quinoa]	--	SubName: Full=Uncharacterized protein {ECO:0000313|EMBL:ACY01924.1};	--	GO:0004190,aspartic-type endopeptidase activity; GO:0008270,zinc ion binding; GO:0003676,nucleic acid binding	--
XLOC_023018	NW_018744068.1	915187	915675	.	--	--	--	--	--	--	--
XLOC_002175	NW_018742309.1	5250600	5251252	.	--	uncharacterized protein LOC110715547 [Chenopodium quinoa]	--	--	--	--	--
XLOC_004765	NW_018742484.1	4968770	4970106	-	K12447 UDP-sugar pyrophosphorylase [EC:2.7.7.64] | (RefSeq) UDP-sugar pyrophosphorylase-like isoform X1 (A)	uncharacterized protein LOC110728776 isoform X1 [Chenopodium quinoa]	--	SubName: Full=Putative ribonuclease H-like domain, GAG-pre-integrase domain, Gag-polypeptide of LTR copia-type {ECO:0000313|EMBL:OTG08979.1};	FOG: Transposon-encoded proteins with TYA, reverse transcriptase, integrase domains in various combinations	GO:0015074,DNA integration; GO:0003676,nucleic acid binding	--
XLOC_011600	NW_018743066.1	1729131	1730376	+	--	uncharacterized protein LOC110805289 [Spinacia oleracea]	--	--	--	--	--
XLOC_005631	NW_018742577.1	2962842	2963463	.	--	--	--	--	--	--	--
XLOC_009861	NW_018742914.1	676875	679483	.	K00799 glutathione S-transferase [EC:2.5.1.18] | (RefSeq) glutathione S-transferase-like (A)	glutathione S-transferase-like [Chenopodium quinoa]	RecName: Full=Glutathione S-transferase F10; Short=AtGSTF10; EC=2.5.1.18; AltName: Full=AtGSTF4; AltName: Full=GST class-phi member 10; AltName: Full=Protein EARLY RESPONSE TO DEHYDRATION 13;	SubName: Full=glutathione S-transferase-like {ECO:0000313|RefSeq:XP_019054394.1};	Glutathione S-transferase	GO:0005737,cytoplasm; GO:0004364,glutathione transferase activity; GO:0009507,chloroplast; GO:0006749,glutathione metabolic process; GO:0005618,cell wall; GO:0005829,cytosol; GO:0048046,apoplast; GO:0005773,vacuole; GO:0009407,toxin catabolic process; GO:0009414,response to water deprivation; GO:0005886,plasma membrane; GO:0046686,response to cadmium ion; GO:0005507,copper ion binding; GO:0043295…	--
XLOC_016244	NW_018743391.1	44234	44929	.	--	zinc finger BED domain-containing protein RICESLEEPER 1-like [Chenopodium quinoa]	RecName: Full=Zinc finger BED domain-containing protein RICESLEEPER 1; AltName: Full=Transposase-like protein RICESLEEPER 1;	SubName: Full=Putative Zinc finger, BED-type {ECO:0000313|EMBL:OMO85397.1};	Tam3-transposase (Ac family)	GO:0003700,DNA-binding transcription factor activity; GO:0005634,nucleus; GO:0009791,post-embryonic development; GO:0006357,regulation of transcription by RNA polymerase II; GO:0000977,RNA polymerase II regulatory region sequence-specific DNA binding; GO:0046983,protein dimerization activity; GO:0046872,metal ion binding; GO:0006351,transcription, DNA-templated	--
XLOC_005560	NW_018742577.1	1464421	1468319	-	--	PREDICTED: uncharacterized protein LOC104891729 [Beta vulgaris subsp. vulgaris]	--	SubName: Full=Uncharacterized protein {ECO:0000313|EMBL:KNA16894.1};	--	GO:0016021,integral component of membrane	Small subunit of serine palmitoyltransferase-like
XLOC_005304	NW_018742556.1	1447250	1456317	-	K03188 urease accessory protein | (RefSeq) urease accessory protein UreF (A)	uncharacterized protein LOC110721604 [Chenopodium quinoa]	--	SubName: Full=Uncharacterized protein {ECO:0000313|EMBL:KNA06250.1};	--	--	--
XLOC_015292	NW_018743292.1	1362026	1362436	.	K17609 nucleoredoxin [EC:1.8.1.8] | (RefSeq) probable nucleoredoxin 2 (A)	hypothetical protein VITISV_040546 [Vitis vinifera]	RecName: Full=Retrovirus-related Pol polyprotein from transposon RE1; AltName: Full=Retro element 1 {ECO:0000303|PubMed:10689195}; Short=AtRE1 {ECO:0000303|PubMed:10689195}; Includes: RecName: Full=Protease RE1; EC=3.4.23.-; Includes: RecName: Full=Reverse transcriptase RE1; EC=2.7.7.49; Includes: RecName: Full=Endonuclease RE1;	SubName: Full=Uncharacterized protein {ECO:0000313|EMBL:CAN82171.1};	FOG: Transposon-encoded proteins with TYA, reverse transcriptase, integrase domains in various combinations	GO:0006310,DNA recombination; GO:0004519,endonuclease activity; GO:0015074,DNA integration; GO:0004190,aspartic-type endopeptidase activity; GO:0003676,nucleic acid binding; GO:0003964,RNA-directed DNA polymerase activity; GO:0046872,metal ion binding	--
XLOC_013361	NW_018743204.1	2348986	2349909	.	--	uncharacterized protein LOC110685687 [Chenopodium quinoa]	--	--	--	--	--
XLOC_013641	NW_018743212.1	1490803	1504605	-	K02469 DNA gyrase subunit A [EC:5.99.1.3] | (RefSeq) DNA gyrase subunit A, chloroplastic/mitochondrial-like (A)	Ty3/gypsy retrotransposon protein [Beta vulgaris subsp. vulgaris]	RecName: Full=Uncharacterized mitochondrial protein AtMg00860; AltName: Full=ORF158;	SubName: Full=Ty3/gypsy retrotransposon protein {ECO:0000313|EMBL:AFK13856.1};	FOG: Transposon-encoded proteins with TYA, reverse transcriptase, integrase domains in various combinations	GO:0005739,mitochondrion	Integrase zinc binding domain
XLOC_023232	NW_018744080.1	5282544	5283751	+	--	--	--	--	--	--	--
XLOC_034631	NW_018745170.1	1967299	1968200	-	--	protein FAR1-RELATED SEQUENCE 8-like [Chenopodium quinoa]	--	--	--	--	--
XLOC_027022	NW_018744497.1	1009142	1013306	-	--	--	--	--	--	--	--
XLOC_032633	NW_018744991.1	1796584	1797814	.	--	hypothetical protein BVRB_8g183270 [Beta vulgaris subsp. vulgaris]	--	--	--	--	--
XLOC_024403	NW_018744151.1	1660503	1663115	+	--	--	--	--	--	--	--
XLOC_007075	NW_018742733.1	1069611	1070401	+	--	--	--	--	--	--	--
XLOC_036156	NW_018745336.1	159475	159932	+	K20027 palmitoyltransferase ZDHHC1/11 [EC:2.3.1.225] | (RefSeq) protein S-acyltransferase 21-like (A)	protein S-acyltransferase 21-like [Chenopodium quinoa]	RecName: Full=Probable protein S-acyltransferase 19; EC=2.3.1.225; AltName: Full=Probable palmitoyltransferase At4g15080; AltName: Full=Zinc finger DHHC domain-containing protein At4g15080;	RecName: Full=S-acyltransferase {ECO:0000256|RuleBase:RU079119}; EC=2.3.1.225 {ECO:0000256|RuleBase:RU079119}; AltName: Full=Palmitoyltransferase {ECO:0000256|RuleBase:RU079119};	DHHC-type Zn-finger proteins	GO:0019706,protein-cysteine S-palmitoyltransferase activity; GO:0016021,integral component of membrane; GO:0005886,plasma membrane	Mlo family
XLOC_038431	NW_018745587.1	355094	356210	-	K08236 limonoid glucosyltransferase [EC:2.4.1.210] | (RefSeq) hypothetical protein (A)	gallate 1-beta-glucosyltransferase-like [Chenopodium quinoa]	RecName: Full=Limonoid UDP-glucosyltransferase; Short=LGTase; Short=Limonoid GTase; Short=Limonoid glucosyltransferase; EC=2.4.1.210;	RecName: Full=Glycosyltransferase {ECO:0000256|RuleBase:RU362057}; EC=2.4.1.- {ECO:0000256|RuleBase:RU362057};	UDP-glucuronosyl and UDP-glucosyl transferase	GO:0050645,limonoid glucosyltransferase activity; GO:0008152,metabolic process	--
XLOC_021645	NW_018743946.1	2749305	2753509	+	--	MDIS1-interacting receptor like kinase 1-like [Chenopodium quinoa]	RecName: Full=MDIS1-interacting receptor like kinase 1 {ECO:0000303|PubMed:26863186}; Short=AtMIK1 {ECO:0000303|PubMed:26863186}; AltName: Full=Leucine-rich repeat receptor-like protein kinase PXL2 {ECO:0000303|PubMed:17570668}; EC=2.7.11.1 {ECO:0000305}; AltName: Full=Protein PHLOEM INTERCALATED WITH XYLEM-LIKE 2 {ECO:0000303|PubMed:17570668}; Flags: Precursor;	SubName: Full=Uncharacterized protein {ECO:0000313|EMBL:KNA19655.1};	--	GO:0006468,protein phosphorylation; GO:0010067,procambium histogenesis; GO:0010087,phloem or xylem histogenesis; GO:0016021,integral component of membrane; GO:0030154,cell differentiation; GO:0090406,pollen tube; GO:0004674,protein serine/threonine kinase activity; GO:0005886,plasma membrane; GO:0004672,protein kinase activity; GO:0046777,protein autophosphorylation; GO:0005524,ATP binding	--
XLOC_006687	NW_018742684.1	3064745	3065321	-	--	--	--	--	--	--	KRI1-like family C-terminal
XLOC_037948	NW_018745523.1	204621	204912	.	--	--	--	--	--	--	--
XLOC_034993	NW_018745190.1	521176	521848	.	--	--	--	--	--	--	--
XLOC_004415	NW_018742461.1	3890726	3890974	.	K18158 nuclear control of ATPase protein 2 | (RefSeq) protein DGS1, mitochondrial-like (A)	protein DGS1, mitochondrial-like [Chenopodium quinoa]	--	SubName: Full=Uncharacterized protein {ECO:0000313|EMBL:KNA24341.1};	--	GO:0016021,integral component of membrane	--
XLOC_002182	NW_018742309.1	6268039	6269176	.	--	uncharacterized protein LOC110702665 [Chenopodium quinoa]	--	SubName: Full=Uncharacterized protein {ECO:0000313|EMBL:ABK94780.1};	--	--	Cotton fibre expressed protein
XLOC_032064	NW_018744946.1	17706	18058	-	--	Regulator of rDNA transcription protein 15 [Capsicum baccatum]	--	SubName: Full=Regulator of rDNA transcription protein 15 {ECO:0000313|EMBL:PHT25216.1};	--	--	--
XLOC_009210	NW_018742899.1	1896878	1897527	.	--	--	--	--	--	--	--
XLOC_028243	NW_018744593.1	3839313	3841974	-	--	uncharacterized protein LOC110690063 isoform X1 [Chenopodium quinoa]	--	SubName: Full=Uncharacterized protein {ECO:0000313|EMBL:KNA17427.1};	--	--	--
XLOC_003747	NW_018742418.1	4246510	4248458	.	--	--	--	--	--	--	--
XLOC_008465	NW_018742815.1	763275	763864	.	--	--	--	--	--	--	--
XLOC_002808	NW_018742390.1	7101800	7146455	+	K00036 glucose-6-phosphate 1-dehydrogenase [EC:1.1.1.49 1.1.1.363] | (RefSeq) glucose-6-phosphate 1-dehydrogenase, chloroplastic-like isoform X1 (A)	glucose-6-phosphate 1-dehydrogenase, chloroplastic-like isoform X2 [Chenopodium quinoa]	RecName: Full=Glucose-6-phosphate 1-dehydrogenase, chloroplastic; Short=G6PD; EC=1.1.1.49; Flags: Precursor;	SubName: Full=Glucose-6-phosphate dehydrogenase {ECO:0000313|EMBL:AFC93470.1}; Flags: Fragment;	Glucose-6-phosphate 1-dehydrogenase	GO:0004345,glucose-6-phosphate dehydrogenase activity; GO:0050661,NADP binding; GO:0006098,pentose-phosphate shunt; GO:0006006,glucose metabolic process; GO:0009507,chloroplast	Glucose-6-phosphate dehydrogenase, NAD binding domain
XLOC_018936	NW_018743697.1	3218919	3219216	.	--	--	--	--	--	--	--
XLOC_020173	NW_018743882.1	5510	6218	.	--	uncharacterized protein LOC110686644 [Chenopodium quinoa]	--	--	--	--	--
XLOC_000818	NW_018742204.1	20442128	20442711	.	--	--	--	--	--	--	--
XLOC_033338	NW_018745013.1	1081750	1083681	+	--	uncharacterized protein LOC110728660 [Chenopodium quinoa]	--	--	--	--	--
XLOC_017896	NW_018743593.1	1535204	1536088	.	--	--	--	--	--	--	--
XLOC_015739	NW_018743332.1	1413998	1415355	-	--	--	--	--	--	--	--
XLOC_032252	NW_018744988.1	1519191	1520728	+	--	--	--	--	--	--	--
XLOC_024847	NW_018744239.1	1216160	1217191	+	--	--	--	--	--	--	--
XLOC_007308	NW_018742733.1	1761433	1762241	.	K01265 methionyl aminopeptidase [EC:3.4.11.18] | (RefSeq) methionine aminopeptidase 2B-like (A)	hypothetical protein VITISV_010115 [Vitis vinifera]	RecName: Full=Retrovirus-related Pol polyprotein from transposon RE1; AltName: Full=Retro element 1 {ECO:0000303|PubMed:10689195}; Short=AtRE1 {ECO:0000303|PubMed:10689195}; Includes: RecName: Full=Protease RE1; EC=3.4.23.-; Includes: RecName: Full=Reverse transcriptase RE1; EC=2.7.7.49; Includes: RecName: Full=Endonuclease RE1;	SubName: Full=Uncharacterized protein {ECO:0000313|EMBL:CAN61230.1};	FOG: Transposon-encoded proteins with TYA, reverse transcriptase, integrase domains in various combinations	GO:0006310,DNA recombination; GO:0004519,endonuclease activity; GO:0015074,DNA integration; GO:0004190,aspartic-type endopeptidase activity; GO:0003676,nucleic acid binding; GO:0003964,RNA-directed DNA polymerase activity; GO:0046872,metal ion binding	--
XLOC_034404	NW_018745105.1	2682125	2686436	+	--	uncharacterized protein LOC110694306 [Chenopodium quinoa]	RecName: Full=Beta-galactosidase 3; Short=Lactase 3; EC=3.2.1.23; Flags: Precursor;	SubName: Full=Uncharacterized protein {ECO:0000313|EMBL:KNA12770.1};	Beta-galactosidase	GO:0005975,carbohydrate metabolic process; GO:0005618,cell wall; GO:0030246,carbohydrate binding; GO:0048046,apoplast; GO:0005773,vacuole; GO:0004565,beta-galactosidase activity	--
XLOC_020800	NW_018743920.1	1886148	1888922	+	--	hypothetical protein SOVF_191020 [Spinacia oleracea]	--	SubName: Full=Uncharacterized protein {ECO:0000313|EMBL:KNA05366.1};	--	--	--
XLOC_036618	NW_018745424.1	47228	47872	.	--	--	--	--	--	--	--
XLOC_002678	NW_018742381.1	1768475	1772205	+	--	uncharacterized protein LOC110702385 [Chenopodium quinoa]	--	--	--	--	--
XLOC_020169	NW_018743880.1	1890245	1891220	.	--	--	--	--	--	--	--
XLOC_003619	NW_018742418.1	6591236	6593368	-	--	--	--	--	--	--	Protein of unknown function (DUF4059)
XLOC_030425	NW_018744718.1	3289805	3294525	-	K09022 2-iminobutanoate/2-iminopropanoate deaminase [EC:3.5.99.10] | (RefSeq) reactive Intermediate Deaminase A, chloroplastic-like (A)	reactive Intermediate Deaminase A, chloroplastic-like [Chenopodium quinoa]	RecName: Full=Reactive Intermediate Deaminase A, chloroplastic {ECO:0000303|PubMed:25070638}; EC=3.5.99.10 {ECO:0000269|PubMed:25070638}; AltName: Full=2-iminobutanoate/2-iminopropanoate deaminase; Flags: Precursor;	SubName: Full=TSA: Wollemia nobilis Ref_Wollemi_Transcript_6689_1023 transcribed RNA sequence {ECO:0000313|EMBL:JAG88636.1};	Putative translation initiation inhibitor UK114/IBM1	GO:0009579,thylakoid; GO:0009941,chloroplast envelope; GO:0009536,plastid; GO:0005773,vacuole; GO:0009570,chloroplast stroma; GO:0009636,response to toxic substance; GO:0005739,mitochondrion; GO:0019239,deaminase activity; GO:0046686,response to cadmium ion; GO:0009097,isoleucine biosynthetic process; GO:0009082,branched-chain amino acid biosynthetic process; GO:0009507,chloroplast	Endoribonuclease L-PSP
XLOC_031977	NW_018744895.1	2747860	2748617	-	--	--	--	--	--	--	--
XLOC_022384	NW_018743987.1	2697705	2698061	.	--	--	--	--	--	--	--
XLOC_020076	NW_018743858.1	3877893	3878455	-	K16223 protein FLOWERING LOCUS T | (RefSeq) protein FLOWERING LOCUS T-like (A)	protein FLOWERING LOCUS T-like [Chenopodium quinoa]	RecName: Full=Protein FLOWERING LOCUS T {ECO:0000303|PubMed:10583960};	SubName: Full=Flowering locus T-like 1 protein {ECO:0000313|EMBL:ABV56568.1};	Phosphatidylethanolamine binding protein	GO:0005737,cytoplasm; GO:0048573,photoperiodism, flowering; GO:0008429,phosphatidylethanolamine binding; GO:0009911,positive regulation of flower development; GO:0030154,cell differentiation; GO:0010119,regulation of stomatal movement; GO:0005634,nucleus; GO:0009908,flower development; GO:0009909,regulation of flower development; GO:0005783,endoplasmic reticulum	--
XLOC_032950	NW_018745000.1	5159388	5160506	.	K20178 vacuolar protein sorting-associated protein 8 | (RefSeq) uncharacterized LOC107864957 (A)	uncharacterized protein LOC110797725 [Spinacia oleracea]	--	SubName: Full=Uncharacterized protein {ECO:0000313|EMBL:CCA66020.1};	FOG: Reverse transcriptase	GO:0003676,nucleic acid binding	--
XLOC_005137	NW_018742541.1	292208	292967	.	K10775 phenylalanine ammonia-lyase [EC:4.3.1.24] | (RefSeq) phenylalanine ammonia-lyase-like (A)	dirigent protein 1-like [Chenopodium quinoa]	RecName: Full=Dirigent protein 1; Short=AtDIR1; Flags: Precursor;	RecName: Full=Dirigent protein {ECO:0000256|RuleBase:RU363099};	--	GO:0048046,apoplast; GO:0016853,isomerase activity	--
XLOC_024806	NW_018744187.1	698209	700065	.	K02350 DNA polymerase zeta [EC:2.7.7.7] | (RefSeq) DNA polymerase zeta catalytic subunit-like (A)	hypothetical protein F511_24998 [Dorcoceras hygrometricum]	RecName: Full=Retrovirus-related Pol polyprotein from transposon TNT 1-94; Includes: RecName: Full=Protease; EC=3.4.23.-; Includes: RecName: Full=Reverse transcriptase; EC=2.7.7.49; Includes: RecName: Full=Endonuclease;	SubName: Full=Uncharacterized protein {ECO:0000313|EMBL:CAN66637.1};	FOG: Transposon-encoded proteins with TYA, reverse transcriptase, integrase domains in various combinations	GO:0004519,endonuclease activity; GO:0015074,DNA integration; GO:0004190,aspartic-type endopeptidase activity; GO:0008270,zinc ion binding; GO:0003676,nucleic acid binding; GO:0003964,RNA-directed DNA polymerase activity	--
XLOC_003469	NW_018742418.1	992931	995436	-	K12447 UDP-sugar pyrophosphorylase [EC:2.7.7.64] | (RefSeq) UDP-sugar pyrophosphorylase-like isoform X1 (A)	uncharacterized protein LOC110686079 [Chenopodium quinoa]	RecName: Full=Retrovirus-related Pol polyprotein from transposon RE2; AltName: Full=Retro element 2 {ECO:0000303|PubMed:10689195}; Short=AtRE2 {ECO:0000303|PubMed:10689195}; Includes: RecName: Full=Protease RE2; EC=3.4.23.-; Includes: RecName: Full=Reverse transcriptase RE2; EC=2.7.7.49; Includes: RecName: Full=Endonuclease RE2;	SubName: Full=Putative ribonuclease H-like domain, GAG-pre-integrase domain, Gag-polypeptide of LTR copia-type {ECO:0000313|EMBL:OTG08979.1};	FOG: Transposon-encoded proteins with TYA, reverse transcriptase, integrase domains in various combinations	GO:0006310,DNA recombination; GO:0004519,endonuclease activity; GO:0015074,DNA integration; GO:0004190,aspartic-type endopeptidase activity; GO:0003676,nucleic acid binding; GO:0003964,RNA-directed DNA polymerase activity; GO:0046872,metal ion binding	GAG-pre-integrase domain
XLOC_022301	NW_018743979.1	4064993	4070769	-	K19984 exocyst complex component 5 | (RefSeq) uncharacterized protein LOC113272286 (A)	hypothetical protein SOVF_185310, partial [Spinacia oleracea]	RecName: Full=Putative AC transposase; AltName: Full=ORFA;	SubName: Full=Uncharacterized protein {ECO:0000313|EMBL:KNA05978.1}; Flags: Fragment;	Tam3-transposase (Ac family)	GO:0006310,DNA recombination; GO:0046983,protein dimerization activity; GO:0032196,transposition; GO:0003677,DNA binding	hAT family C-terminal dimerisation region
XLOC_004911	NW_018742487.1	387105	387543	.	--	uncharacterized protein LOC110716070 [Chenopodium quinoa]	--	--	--	--	--
XLOC_012427	NW_018743175.1	1015609	1017267	-	--	hypothetical protein SOVF_048860 [Spinacia oleracea]	--	SubName: Full=Uncharacterized protein {ECO:0000313|EMBL:KNA20793.1};	--	--	--
XLOC_023342	NW_018744080.1	1874916	1876141	.	--	hypothetical protein BVRB_3g061030 [Beta vulgaris subsp. vulgaris]	--	--	--	--	--
XLOC_015722	NW_018743331.1	10218619	10219825	.	--	--	--	--	--	--	--
XLOC_038871	NW_018745675.1	2025799	2028213	-	K01255 leucyl aminopeptidase [EC:3.4.11.1] | (RefSeq) LOC109783148; leucine aminopeptidase 2, chloroplastic (A)	--	RecName: Full=Leucine aminopeptidase 2, chloroplastic; EC=3.4.11.1; AltName: Full=Leucyl aminopeptidase 2; Short=LAP 2; AltName: Full=Proline aminopeptidase 2; EC=3.4.11.5; AltName: Full=Prolyl aminopeptidase 2; Flags: Precursor;	--	--	GO:0004177,aminopeptidase activity; GO:0008235,metalloexopeptidase activity; GO:0030145,manganese ion binding; GO:0009507,chloroplast	--
XLOC_006525	NW_018742684.1	1816584	1818305	+	--	uncharacterized protein LOC110700764 [Chenopodium quinoa]	--	SubName: Full=Uncharacterized protein {ECO:0000313|EMBL:KMS65158.1}; Flags: Fragment;	--	--	--
XLOC_016684	NW_018743510.1	624609	626940	+	--	--	--	--	--	--	--
XLOC_025538	NW_018744290.1	1090146	1092054	-	--	hypothetical protein BVRB_6g132470 [Beta vulgaris subsp. vulgaris]	--	SubName: Full=Uncharacterized protein {ECO:0000313|EMBL:OWM72355.1};	--	--	--
XLOC_013204	NW_018743199.1	302579	303258	.	--	PREDICTED: uncharacterized protein LOC104597159 [Nelumbo nucifera]	RecName: Full=Cyclin-dependent protein kinase inhibitor SMR4 {ECO:0000303|PubMed:17599908, ECO:0000303|PubMed:24399300, ECO:0000303|PubMed:26546445}; AltName: Full=Protein SIAMESE-RELATED 4 {ECO:0000303|PubMed:17599908, ECO:0000303|PubMed:24399300, ECO:0000303|PubMed:26546445};	SubName: Full=uncharacterized protein LOC104597159 {ECO:0000313|RefSeq:XP_010256881.1};	--	GO:0004860,protein kinase inhibitor activity; GO:0007049,cell cycle	--
XLOC_004423	NW_018742461.1	4346690	4347490	.	--	hypothetical protein BVRB_9g216270 [Beta vulgaris subsp. vulgaris]	--	SubName: Full=Uncharacterized protein {ECO:0000313|EMBL:KNA08938.1};	--	--	--
XLOC_033790	NW_018745024.1	11899401	11906285	-	K15255 ATP-dependent DNA helicase PIF1 [EC:3.6.4.12] | (RefSeq) ATP-dependent DNA helicase pif1-like (A)	uncharacterized protein LOC109707801 [Ananas comosus]	--	SubName: Full=Uncharacterized protein {ECO:0000313|EMBL:EOY04504.1};	DNA helicase PIF1/RRM3	--	--
XLOC_010565	NW_018742986.1	13526	13812	.	K02132 F-type H+-transporting ATPase subunit alpha | (RefSeq) atp1, E2298_mgp11; ATP synthase subunit 1 (A)	Atp1 (mitochondrion) [Spinacia oleracea]	RecName: Full=ATP synthase subunit alpha, mitochondrial;	RecName: Full=ATP synthase subunit alpha {ECO:0000256|RuleBase:RU003551};	F0F1-type ATP synthase, alpha subunit	GO:0015986,ATP synthesis coupled proton transport; GO:0046933,proton-transporting ATP synthase activity, rotational mechanism; GO:0000275,mitochondrial proton-transporting ATP synthase complex, catalytic core F(1); GO:0005739,mitochondrion; GO:0006754,ATP biosynthetic process; GO:0005524,ATP binding	--
XLOC_034063	NW_018745067.1	965352	966635	-	--	hypothetical protein SOVF_074060 [Spinacia oleracea]	--	SubName: Full=Uncharacterized protein {ECO:0000313|EMBL:KNA18089.1};	--	--	--
XLOC_015269	NW_018743292.1	13208697	13210730	-	--	hypothetical protein SOVF_060530 [Spinacia oleracea]	--	SubName: Full=Uncharacterized protein {ECO:0000313|EMBL:KNA19517.1};	--	--	CEP170 C-terminus
XLOC_036591	NW_018745413.1	4611184	4611530	.	K19984 exocyst complex component 5 | (RefSeq) uncharacterized protein LOC113272286 (A)	hypothetical protein SOVF_158470 [Spinacia oleracea]	RecName: Full=Putative AC transposase; AltName: Full=ORFA;	SubName: Full=Uncharacterized protein {ECO:0000313|EMBL:KNA08905.1};	Tam3-transposase (Ac family)	GO:0006310,DNA recombination; GO:0046983,protein dimerization activity; GO:0032196,transposition; GO:0003677,DNA binding	--
XLOC_034734	NW_018745174.1	2268554	2269262	+	--	--	--	--	--	--	--
XLOC_025324	NW_018744268.1	2929981	2930591	.	--	--	--	--	--	--	--
XLOC_023626	NW_018744092.1	2772100	2772355	.	--	--	--	--	--	--	--
XLOC_011511	NW_018743051.1	32786	33207	.	--	--	--	--	--	--	--
XLOC_009330	NW_018742904.1	1368926	1370118	.	--	--	--	--	--	--	--
XLOC_037767	NW_018745523.1	548136	550988	+	--	--	--	--	--	--	--
XLOC_005985	NW_018742616.1	4163385	4165423	-	--	--	--	--	--	--	--
XLOC_003503	NW_018742418.1	2018173	2020301	-	K23541 Ca2+/H+ antiporter, TMEM165/GDT1 family | (RefSeq) GDT1-like protein 4 (A)	zinc finger BED domain-containing protein RICESLEEPER 3-like [Chenopodium quinoa]	RecName: Full=Putative AC transposase; AltName: Full=ORFA;	SubName: Full=Putative AC transposase {ECO:0000313|EMBL:KYP31138.1};	Tam3-transposase (Ac family)	GO:0006310,DNA recombination; GO:0046983,protein dimerization activity; GO:0032196,transposition; GO:0003677,DNA binding	hAT family C-terminal dimerisation region
XLOC_020136	NW_018743873.1	15	919	-	K19033 30S ribosomal protein S31 | (RefSeq) 30S ribosomal protein S31, chloroplastic (A)	30S ribosomal protein S31, chloroplastic [Chenopodium quinoa]	RecName: Full=30S ribosomal protein S31, chloroplastic {ECO:0000303|PubMed:10874039}; AltName: Full=Chloroplastic small ribosomal subunit protein bTHXc {ECO:0000303|PubMed:28007896}; AltName: Full=Plastid-specific 30S ribosomal protein 4; Short=PSRP-4; Flags: Precursor;	SubName: Full=Uncharacterized protein {ECO:0000313|EnsemblPlants:Solyc05g052710.2.1};	--	GO:0009507,chloroplast; GO:0005840,ribosome; GO:0019843,rRNA binding	Ribosomal protein S31e
XLOC_015355	NW_018743294.1	131293	132233	+	--	--	--	--	--	--	--
XLOC_038684	NW_018745650.1	2658490	2659716	-	--	hypothetical protein SOVF_054620 [Spinacia oleracea]	--	SubName: Full=Uncharacterized protein {ECO:0000313|EMBL:KNA20131.1};	--	--	--
XLOC_019433	NW_018743813.1	32756	33838	+	--	RNA polymerase II degradation factor 1-like [Chenopodium quinoa]	--	SubName: Full=Uncharacterized protein {ECO:0000313|EMBL:KNA25274.1};	--	--	--
XLOC_011430	NW_018743050.1	3260636	3263254	-	K08341 GABA(A) receptor-associated protein | (RefSeq) autophagy-related protein 8f (A)	uncharacterized protein LOC110726319 isoform X2 [Chenopodium quinoa]	--	SubName: Full=Uncharacterized protein {ECO:0000313|EMBL:KNA19479.1};	--	--	--
XLOC_037266	NW_018745454.1	4516814	4517428	-	--	--	--	--	--	--	--
XLOC_023194	NW_018744080.1	3085561	3085904	+	--	uncharacterized protein LOC110740324 [Chenopodium quinoa]	--	--	--	--	--
XLOC_022381	NW_018743987.1	2284710	2284984	.	--	protein FAR-RED IMPAIRED RESPONSE 1-like isoform X2 [Chenopodium quinoa]	--	--	--	--	--
XLOC_008599	NW_018742861.1	1111652	1113556	+	K16296 serine carboxypeptidase-like clade I [EC:3.4.16.-] | (RefSeq) serine carboxypeptidase-like 17 (A)	uncharacterized protein LOC110733941 [Chenopodium quinoa]	--	SubName: Full=Uncharacterized protein {ECO:0000313|EMBL:CCA65979.1};	FOG: Reverse transcriptase	--	--
XLOC_024886	NW_018744239.1	3902830	3904720	+	K05575 NAD(P)H-quinone oxidoreductase subunit 4 [EC:7.1.1.2] | (RefSeq) ndhD, CDC77_pgp013; NdhD (A)	cytochrome c heme attachment protein (chloroplast) [Chenopodium quinoa]	RecName: Full=Cytochrome c biogenesis protein CcsA {ECO:0000255|HAMAP-Rule:MF_01391};	RecName: Full=Cytochrome c biogenesis protein CcsA {ECO:0000256|HAMAP-Rule:MF_01391};	--	GO:0009535,chloroplast thylakoid membrane; GO:0016021,integral component of membrane; GO:0017004,cytochrome complex assembly; GO:0020037,heme binding	--
XLOC_015316	NW_018743292.1	6080352	6081265	.	K14488 SAUR family protein | (RefSeq) auxin-induced protein 6B-like (A)	hypothetical protein SOVF_162740 [Spinacia oleracea]	RecName: Full=Auxin-responsive protein SAUR32 {ECO:0000305}; AltName: Full=Protein ABOLISHED APICAL HOOK MAINTENANCE 1 {ECO:0000303|Ref.6}; AltName: Full=Protein SMALL AUXIN UP RNA 32 {ECO:0000303|PubMed:12036261};	SubName: Full=Uncharacterized protein {ECO:0000313|EMBL:KNA08427.1};	--	GO:0005737,cytoplasm; GO:0009734,auxin-activated signaling pathway; GO:0005634,nucleus; GO:0007275,multicellular organism development; GO:1900140,regulation of seedling development; GO:0040008,regulation of growth	--
XLOC_015813	NW_018743369.1	791950	792153	.	--	--	--	--	--	--	--
XLOC_035308	NW_018745275.1	274538	275066	.	--	--	--	--	--	--	--
XLOC_013746	NW_018743212.1	6047054	6047400	-	--	--	--	--	--	--	--
XLOC_032996	NW_018745003.1	1253214	1255316	+	--	hypothetical protein SOVF_104690 [Spinacia oleracea]	--	SubName: Full=Uncharacterized protein {ECO:0000313|EMBL:KNA14740.1};	--	--	Phosphate transporter family
XLOC_023624	NW_018744092.1	2384931	2385412	.	--	--	--	--	--	--	WW domain-binding protein 1
XLOC_025326	NW_018744268.1	3698654	3699043	.	--	--	--	--	--	--	--
XLOC_013206	NW_018743199.1	1405694	1405949	.	--	--	--	--	--	--	--
XLOC_010778	NW_018743003.1	120962	125527	+	--	uncharacterized protein LOC110717801 [Chenopodium quinoa]	--	--	--	--	--
XLOC_024671	NW_018744167.1	1596849	1597800	+	K11153 retinol dehydrogenase 12 [EC:1.1.1.300] | (RefSeq) short-chain dehydrogenase TIC 32, chloroplastic-like (A)	short-chain dehydrogenase TIC 32, chloroplastic-like isoform X1 [Chenopodium quinoa]	RecName: Full=Short-chain dehydrogenase TIC 32, chloroplastic; EC=1.1.1.-; AltName: Full=Translocon at the inner envelope membrane of chloroplasts 32; Short=AtTIC32;	SubName: Full=Uncharacterized protein {ECO:0000313|EnsemblPlants:TRIAE_CS42_1BL_TGACv1_030440_AA0090740.1};	Dehydrogenases with different specificities (related to short-chain alcohol dehydrogenases)	GO:0009941,chloroplast envelope; GO:0009706,chloroplast inner membrane; GO:0005886,plasma membrane; GO:0015031,protein transport; GO:0016491,oxidoreductase activity; GO:0009507,chloroplast	--
XLOC_034239	NW_018745080.1	832059	833156	-	--	probable ATP-dependent DNA helicase CHR12 [Chenopodium quinoa]	--	SubName: Full=Uncharacterized protein {ECO:0000313|EMBL:KNA18095.1};	--	GO:0042393,histone binding; GO:0005524,ATP binding	--
XLOC_023093	NW_018744072.1	1617838	1620314	-	K12627 U6 snRNA-associated Sm-like protein LSm8 | (RefSeq) sm-like protein LSM8 isoform X1 (A)	sm-like protein LSM8 isoform X1 [Spinacia oleracea]	RecName: Full=Sm-like protein LSM8 {ECO:0000305}; Short=AtLSM8 {ECO:0000303|PubMed:23620288}; AltName: Full=U6 snRNA-associated Sm-like protein LSM8 {ECO:0000305};	SubName: Full=BnaA07g25380D protein {ECO:0000313|EMBL:CDY07459.1};	Small Nuclear ribonucleoprotein splicing factor	GO:0071011,precatalytic spliceosome; GO:0046540,U4/U6 x U5 tri-snRNP complex; GO:0003723,RNA binding; GO:0000398,mRNA splicing, via spliceosome; GO:0005688,U6 snRNP	--
XLOC_007897	NW_018742770.1	4566805	4567081	.	--	--	--	--	--	--	--
XLOC_004451	NW_018742476.1	35664	38190	+	--	--	--	--	--	--	--
XLOC_027847	NW_018744577.1	214281	214863	.	--	--	--	--	--	--	--
XLOC_007899	NW_018742772.1	15289	16009	.	--	--	--	--	--	--	--
XLOC_016336	NW_018743405.1	3181998	3187081	+	K02218 casein kinase 1 [EC:2.7.11.1] | (RefSeq) uncharacterized protein LOC8069780 (A)	putative nuclease HARBI1 isoform X1 [Spinacia oleracea]	RecName: Full=L10-interacting MYB domain-containing protein {ECO:0000303|PubMed:25707794};	SubName: Full=Uncharacterized protein {ECO:0000313|EMBL:KNA03156.1};	Predicted transposase	GO:0006355,regulation of transcription, DNA-templated; GO:0005634,nucleus; GO:0006351,transcription, DNA-templated	Plant transposon protein
XLOC_014459	NW_018743292.1	310365	311730	+	--	PREDICTED: uncharacterized protein LOC18589643 [Theobroma cacao]	--	SubName: Full=Uncharacterized protein {ECO:0000313|EMBL:EOY32380.1};	--	GO:0016021,integral component of membrane; GO:0006979,response to oxidative stress	Predicted membrane protein (DUF2157)
XLOC_028046	NW_018744582.1	1191501	1192084	.	--	uncharacterized protein LOC110693706 isoform X2 [Chenopodium quinoa]	--	SubName: Full=Uncharacterized protein {ECO:0000313|EMBL:KNA07589.1};	--	--	--
XLOC_034692	NW_018745170.1	5244538	5245097	.	--	--	--	--	--	--	--
XLOC_011363	NW_018743050.1	2828833	2830735	+	--	heavy metal-associated isoprenylated plant protein 3-like [Chenopodium quinoa]	RecName: Full=Heavy metal-associated isoprenylated plant protein 3 {ECO:0000303|PubMed:21072340, ECO:0000303|PubMed:23368984}; Short=AtHIP03 {ECO:0000303|PubMed:21072340, ECO:0000303|PubMed:23368984}; Short=AtHIPP3 {ECO:0000303|PubMed:21072340, ECO:0000303|PubMed:23368984}; Flags: Precursor;	SubName: Full=Uncharacterized protein {ECO:0000313|EMBL:KNA16606.1};	Copper chaperone	GO:0005737,cytoplasm; GO:0005730,nucleolus; GO:0005634,nucleus; GO:0009910,negative regulation of flower development; GO:0030001,metal ion transport; GO:0008270,zinc ion binding	--
XLOC_007542	NW_018742763.1	1436892	1438312	+	--	--	--	--	--	--	--
XLOC_009587	NW_018742914.1	6374339	6380056	+	K19984 exocyst complex component 5 | (RefSeq) uncharacterized protein LOC113272286 (A)	hypothetical protein SOVF_185310, partial [Spinacia oleracea]	RecName: Full=Putative AC transposase; AltName: Full=ORFA;	SubName: Full=Uncharacterized protein {ECO:0000313|EMBL:KNA05978.1}; Flags: Fragment;	Tam3-transposase (Ac family)	GO:0006310,DNA recombination; GO:0046983,protein dimerization activity; GO:0032196,transposition; GO:0003677,DNA binding	--
XLOC_013616	NW_018743212.1	817908	818392	-	--	--	--	--	--	--	--
XLOC_036657	NW_018745448.1	5811061	5812390	+	--	--	--	--	--	--	--
XLOC_015314	NW_018743292.1	5897645	5898312	.	--	--	--	--	--	--	--
XLOC_031020	NW_018744845.1	634588	638754	-	--	--	--	--	--	--	--
XLOC_037571	NW_018745461.1	767063	767972	.	--	--	--	--	--	--	--
XLOC_020355	NW_018743905.1	461483	463007	.	--	hypothetical protein BVRB_7g165340 [Beta vulgaris subsp. vulgaris]	--	SubName: Full=Uncharacterized protein {ECO:0000313|EMBL:KMT10967.1};	--	GO:0004040,amidase activity	--
XLOC_019143	NW_018743783.1	1790046	1790480	.	K05906 prenylcysteine oxidase / farnesylcysteine lyase [EC:1.8.3.5 1.8.3.6] | (RefSeq) farnesylcysteine lyase-like (A)	farnesylcysteine lyase-like [Chenopodium quinoa]	--	SubName: Full=Uncharacterized protein {ECO:0000313|EMBL:KNA17032.1};	--	GO:0030328,prenylcysteine catabolic process; GO:0001735,prenylcysteine oxidase activity	NAD(P)-binding Rossmann-like domain
XLOC_003935	NW_018742455.1	640809	641841	+	--	--	--	--	--	--	--
XLOC_020071	NW_018743858.1	3265743	3266393	-	K23200 putative arabinosyltransferase [EC:2.4.2.-] | (RefSeq) probable arabinosyltransferase ARAD1 isoform X1 (A)	probable arabinosyltransferase ARAD1 isoform X1 [Chenopodium quinoa]	RecName: Full=Probable arabinosyltransferase ARAD1; EC=2.4.2.-; AltName: Full=Arabinan alpha-1,5-arabinosyltransferase; AltName: Full=L-Arabinosyltransferase; AltName: Full=Protein ARABINAN DEFICIENT 1;	SubName: Full=Uncharacterized protein {ECO:0000313|EMBL:CDP11255.1};	Acetylglucosaminyltransferase EXT1/exostosin 1	GO:0005794,Golgi apparatus; GO:0006486,protein glycosylation; GO:0016021,integral component of membrane; GO:0005802,trans-Golgi network; GO:0000139,Golgi membrane; GO:0045489,pectin biosynthetic process; GO:0071555,cell wall organization; GO:0016757,transferase activity, transferring glycosyl groups; GO:0005768,endosome	--
XLOC_003860	NW_018742441.1	944567	946839	+	--	--	--	--	--	--	--
XLOC_028298	NW_018744593.1	7547479	7549219	.	K13412 calcium-dependent protein kinase [EC:2.7.11.1] | (RefSeq) calcium-dependent protein kinase 10-like (A)	polyprotein [Oryza australiensis]	RecName: Full=Retrovirus-related Pol polyprotein from transposon TNT 1-94; Includes: RecName: Full=Protease; EC=3.4.23.-; Includes: RecName: Full=Reverse transcriptase; EC=2.7.7.49; Includes: RecName: Full=Endonuclease;	SubName: Full=Uncharacterized protein {ECO:0000313|EMBL:JAD75782.1};	FOG: Transposon-encoded proteins with TYA, reverse transcriptase, integrase domains in various combinations	GO:0004519,endonuclease activity; GO:0015074,DNA integration; GO:0004190,aspartic-type endopeptidase activity; GO:0008270,zinc ion binding; GO:0003676,nucleic acid binding; GO:0003964,RNA-directed DNA polymerase activity	--
XLOC_009110	NW_018742899.1	557881	558639	+	--	--	--	--	--	--	--
XLOC_020134	NW_018743863.1	1766982	1767448	.	--	--	--	--	--	--	--
XLOC_019089	NW_018743783.1	2200192	2206041	+	--	PREDICTED: uncharacterized protein LOC104908875 [Beta vulgaris subsp. vulgaris]	--	SubName: Full=Uncharacterized protein {ECO:0000313|EMBL:KNA18319.1}; Flags: Fragment;	--	GO:0003676,nucleic acid binding	--
XLOC_023294	NW_018744080.1	3262951	3265246	-	K14018 phospholipase A-2-activating protein | (RefSeq) phospholipase A-2-activating protein-like (A)	phospholipase A-2-activating protein-like [Chenopodium quinoa]	--	SubName: Full=Uncharacterized protein {ECO:0000313|EMBL:KNA10607.1};	Phospholipase A2-activating protein (contains WD40 repeats)	--	--
XLOC_019474	NW_018743814.1	235707	236575	-	--	--	--	--	--	--	--
XLOC_002462	NW_018742345.1	1355082	1358268	+	--	PREDICTED: GDSL esterase/lipase At1g71250-like [Beta vulgaris subsp. vulgaris]	--	SubName: Full=Uncharacterized protein {ECO:0000313|EMBL:KNA14244.1};	--	GO:0016021,integral component of membrane; GO:0016788,hydrolase activity, acting on ester bonds	Family of unknown function (DUF5510)
XLOC_006580	NW_018742684.1	3333825	3334899	+	K04123 ent-kaurenoic acid hydroxylase [EC:1.14.13.79] | (RefSeq) cytochrome P450 family ent-kaurenoic acid oxidase (A)	ent-kaurenoic acid oxidase 1-like isoform X2 [Chenopodium quinoa]	RecName: Full=Ent-kaurenoic acid oxidase 2; Short=AtKAO2; EC=1.14.13.79; AltName: Full=Cytochrome P450 88A4;	SubName: Full=Uncharacterized protein {ECO:0000313|EMBL:KCW49376.1};	Cytochrome P450 CYP4/CYP19/CYP26 subfamilies	GO:0016125,sterol metabolic process; GO:0005783,endoplasmic reticulum; GO:0020037,heme binding; GO:0016132,brassinosteroid biosynthetic process; GO:0016021,integral component of membrane; GO:0010268,brassinosteroid homeostasis; GO:0009686,gibberellin biosynthetic process; GO:0005789,endoplasmic reticulum membrane; GO:0051777,ent-kaurenoate oxidase activity; GO:0005506,iron ion binding; GO:0007275…	Protein of unknown function (DUF809)
XLOC_031296	NW_018744874.1	2680633	2690506	+	--	--	--	--	--	--	--
XLOC_012142	NW_018743136.1	3066667	3066909	.	K06676 condensin complex subunit 2 | (RefSeq) condensin complex subunit 2 (A)	PREDICTED: condensin complex subunit 2 [Beta vulgaris subsp. vulgaris]	--	--	--	--	--
XLOC_037401	NW_018745461.1	86970	98268	+	--	uncharacterized protein LOC110722361 [Chenopodium quinoa]	--	--	--	--	--
XLOC_004638	NW_018742484.1	7405360	7406229	+	--	--	--	--	--	--	--
XLOC_002612	NW_018742359.1	716955	717938	.	--	uncharacterized protein LOC110729962 [Chenopodium quinoa]	--	SubName: Full=Uncharacterized protein {ECO:0000313|EMBL:KMT10967.1};	--	GO:0004040,amidase activity	ATHILA ORF-1 family
XLOC_031797	NW_018744878.1	4948156	4950259	-	--	hypothetical protein SOVF_088820 [Spinacia oleracea]	--	SubName: Full=Uncharacterized protein {ECO:0000313|EMBL:KNA16485.1};	--	--	--
XLOC_001280	NW_018742205.1	2579155	2579360	.	--	--	--	--	--	--	--
XLOC_016255	NW_018743391.1	2959183	2959893	.	K01859 chalcone isomerase [EC:5.5.1.6] | (RefSeq) chalcone--flavonone isomerase (A)	hypothetical protein BVC80_4285g1 [Macleaya cordata]	--	SubName: Full=Uncharacterized protein {ECO:0000313|EMBL:OVA05688.1};	--	--	--
XLOC_001831	NW_018742244.1	2736087	2736790	.	--	hypothetical protein SOVF_035320 [Spinacia oleracea]	--	SubName: Full=Uncharacterized protein {ECO:0000313|EMBL:KNA22292.1};	--	--	--
XLOC_034447	NW_018745105.1	2634034	2634912	.	--	--	--	--	--	--	--
XLOC_020131	NW_018743863.1	904661	905386	.	--	--	--	--	--	--	--
XLOC_034533	NW_018745170.1	1935314	1935753	+	--	protein KAKU4-like [Chenopodium quinoa]	--	SubName: Full=Uncharacterized protein {ECO:0000313|EMBL:KNA13207.1};	--	--	--
XLOC_017320	NW_018743574.1	4388133	4392056	+	--	--	--	--	--	--	--
XLOC_028501	NW_018744620.1	1255792	1256157	.	--	--	--	--	--	--	--
XLOC_021027	NW_018743920.1	8460764	8461868	+	--	--	--	--	--	--	--
XLOC_013181	NW_018743199.1	4515516	4519901	-	--	phosphopantothenoylcysteine decarboxylase subunit VHS3-like [Chenopodium quinoa]	--	SubName: Full=Uncharacterized protein {ECO:0000313|EMBL:KNA04719.1};	--	GO:0016021,integral component of membrane	--
XLOC_000212	NW_018742204.1	17010932	17013329	+	K10393 kinesin family member 2/24 | (RefSeq) kinesin-13A-like (A)	uncharacterized protein LOC110797976 [Spinacia oleracea]	RecName: Full=Putative ribonuclease H protein At1g65750; EC=3.1.26.4;	SubName: Full=Uncharacterized protein {ECO:0000313|EMBL:CCA65981.1};	FOG: Reverse transcriptase	GO:0046872,metal ion binding; GO:0004523,RNA-DNA hybrid ribonuclease activity; GO:0003676,nucleic acid binding	Reverse transcriptase (RNA-dependent DNA polymerase)
XLOC_032771	NW_018744996.1	2385765	2387374	-	--	zinc finger BED domain-containing protein RICESLEEPER 3-like isoform X1 [Chenopodium quinoa]	--	--	--	--	--
XLOC_037574	NW_018745461.1	797732	800402	.	--	--	--	--	--	--	--
XLOC_006711	NW_018742684.1	1788565	1789142	.	--	--	--	--	--	--	--
XLOC_022883	NW_018744066.1	2922266	2924929	+	--	uncharacterized protein LOC110707806 [Chenopodium quinoa]	--	SubName: Full=Uncharacterized protein {ECO:0000313|EMBL:KNA06884.1};	--	GO:0016021,integral component of membrane	--
XLOC_014472	NW_018743292.1	631972	632567	+	K13366 polyamine oxidase [EC:1.5.3.14 1.5.3.16 1.5.3.-] | (RefSeq) polyamine oxidase-like (A)	polyamine oxidase-like [Chenopodium quinoa]	--	--	--	--	--
XLOC_015311	NW_018743292.1	5547610	5548055	.	--	hypothetical protein SOVF_160130 [Spinacia oleracea]	--	SubName: Full=Uncharacterized protein {ECO:0000313|EMBL:KNA08719.1};	--	--	--
XLOC_026153	NW_018744311.1	1963131	1964890	.	K14442 ATP-dependent RNA helicase DHX36 [EC:3.6.4.13] | (RefSeq) DExH-box ATP-dependent RNA helicase DExH6-like (A)	PREDICTED: uncharacterized protein LOC104887816 [Beta vulgaris subsp. vulgaris]	RecName: Full=Putative ribonuclease H protein At1g65750; EC=3.1.26.4;	SubName: Full=Uncharacterized protein {ECO:0000313|EMBL:CCA66009.1};	FOG: Reverse transcriptase	GO:0046872,metal ion binding; GO:0004523,RNA-DNA hybrid ribonuclease activity; GO:0003676,nucleic acid binding	--
XLOC_039015	NW_018745684.1	3249283	3251734	+	--	uncharacterized protein LOC110716538 [Chenopodium quinoa]	--	SubName: Full=Fgenesh protein 21 {ECO:0000313|EMBL:ABD83280.1};	--	--	--
XLOC_036613	NW_018745419.1	1093842	1094676	.	--	--	--	--	--	--	Plant viral coat protein nucleocapsid
XLOC_036589	NW_018745413.1	2517009	2517824	.	--	--	--	--	--	--	--
XLOC_030320	NW_018744718.1	62339	63405	-	--	--	--	--	--	--	--
XLOC_007303	NW_018742733.1	1122711	1123615	.	--	protein NDR1-like [Chenopodium quinoa]	RecName: Full=Protein NDR1; AltName: Full=Non-race specific disease resistance protein 1; Short=AtNDR1; Flags: Precursor;	SubName: Full=Uncharacterized protein {ECO:0000313|EMBL:KNA09684.1}; Flags: Fragment;	--	GO:0009816,defense response to bacterium, incompatible interaction; GO:0009817,defense response to fungus, incompatible interaction; GO:0009814,defense response, incompatible interaction; GO:0016020,membrane; GO:0009626,plant-type hypersensitive response; GO:0046658,anchored component of plasma membrane; GO:0042742,defense response to bacterium; GO:0005886,plasma membrane; GO:0010942,positive reg…	--
XLOC_030917	NW_018744835.1	1333310	1334630	+	--	--	--	--	--	--	--
XLOC_014679	NW_018743292.1	6622158	6622569	+	K17710 pentatricopeptide repeat domain-containing protein 1 | (RefSeq) pentatricopeptide repeat-containing protein At3g22470, mitochondrial-like (A)	putative pentatricopeptide repeat-containing protein At1g12700, mitochondrial [Chenopodium quinoa]	RecName: Full=Putative pentatricopeptide repeat-containing protein At1g12700, mitochondrial; Flags: Precursor;	SubName: Full=Uncharacterized protein {ECO:0000313|EMBL:KMS94719.1};	FOG: PPR repeat	GO:0004519,endonuclease activity; GO:0080156,mitochondrial mRNA modification; GO:0003723,RNA binding; GO:0005739,mitochondrion; GO:0006397,mRNA processing	--
XLOC_036463	NW_018745410.1	1902791	1903266	.	--	--	--	--	--	--	--
XLOC_020332	NW_018743894.1	3902852	3905485	-	--	uncharacterized protein LOC110715060 [Chenopodium quinoa]	--	SubName: Full=Uncharacterized protein {ECO:0000313|EMBL:KNA04305.1};	--	--	--
XLOC_028105	NW_018744589.1	615171	616099	.	--	uncharacterized protein LOC110707588 [Chenopodium quinoa]	--	SubName: Full=Putative ovule protein {ECO:0000313|EMBL:JAP21092.1}; Flags: Fragment;	--	GO:0015074,DNA integration; GO:0003676,nucleic acid binding	--
XLOC_005565	NW_018742577.1	1548975	1549828	-	--	--	--	--	--	--	--
XLOC_036587	NW_018745413.1	1661191	1661897	.	--	--	--	--	--	--	--
XLOC_033014	NW_018745003.1	1723549	1725523	+	K19984 exocyst complex component 5 | (RefSeq) uncharacterized protein LOC113272286 (A)	zinc finger BED domain-containing protein RICESLEEPER 4-like [Chenopodium quinoa]	RecName: Full=Zinc finger BED domain-containing protein RICESLEEPER 3; AltName: Full=Transposase-like protein RICESLEEPER 3;	SubName: Full=Uncharacterized protein {ECO:0000313|EMBL:KNA20152.1};	Tam3-transposase (Ac family)	GO:0003700,DNA-binding transcription factor activity; GO:0005634,nucleus; GO:0009791,post-embryonic development; GO:0006357,regulation of transcription by RNA polymerase II; GO:0000977,RNA polymerase II regulatory region sequence-specific DNA binding; GO:0046983,protein dimerization activity; GO:0046872,metal ion binding; GO:0006351,transcription, DNA-templated	BED zinc finger
XLOC_032821	NW_018744996.1	3701719	3702411	.	--	--	--	--	--	--	--
XLOC_011529	NW_018743054.1	105095	107099	+	--	--	--	--	--	--	--
XLOC_014413	NW_018743285.1	3232472	3233330	-	--	--	--	--	--	--	--
XLOC_021460	NW_018743922.1	13438	17036	-	--	uncharacterized protein LOC110725023 [Chenopodium quinoa]	--	SubName: Full=Uncharacterized protein {ECO:0000313|EMBL:KNA06137.1};	--	GO:0016021,integral component of membrane	--
XLOC_003250	NW_018742415.1	2134037	2134685	.	--	--	--	--	--	--	--
XLOC_010077	NW_018742951.1	7314375	7316724	-	--	--	--	--	--	--	--
XLOC_016556	NW_018743448.1	2352946	2353183	.	--	--	--	--	--	--	--
XLOC_038229	NW_018745542.1	570472	571466	.	--	--	--	--	--	--	--
XLOC_036203	NW_018745382.1	41165	42343	.	--	--	--	--	--	--	--
XLOC_000813	NW_018742204.1	19569963	19570289	.	--	--	--	--	--	--	--
XLOC_023860	NW_018744113.1	3184723	3189822	+	--	uncharacterized protein LOC110706887 [Chenopodium quinoa]	--	SubName: Full=Uncharacterized protein {ECO:0000313|EMBL:KNA22348.1};	--	--	Plant transposase (Ptta/En/Spm family)
XLOC_011024	NW_018743021.1	1361085	1362331	-	--	--	--	--	--	--	--
XLOC_036477	NW_018745410.1	8273288	8273770	.	--	--	--	--	--	--	--
XLOC_010484	NW_018742974.1	2157011	2157861	.	--	--	--	--	--	--	--
XLOC_005998	NW_018742616.1	2911663	2912077	.	--	--	--	--	--	--	--
XLOC_005712	NW_018742598.1	1022495	1022695	.	--	--	--	--	--	--	--
XLOC_039500	NW_018745684.1	3035734	3036752	.	--	--	--	--	--	--	--
XLOC_036001	NW_018745323.1	1611342	1612035	-	--	--	--	--	--	--	--
XLOC_018978	NW_018743722.1	615907	616152	.	--	--	--	--	--	--	--
XLOC_032824	NW_018744996.1	3782912	3784727	.	--	--	--	--	--	--	--
XLOC_022462	NW_018744026.1	329394	329733	.	K13111 WD40 repeat-containing protein SMU1 | (RefSeq) suppressor of mec-8 and unc-52 protein homolog 1-like (A)	uncharacterized protein LOC110712987 [Chenopodium quinoa]	--	SubName: Full=Transposon-like protein {ECO:0000313|EMBL:ABM55245.1};	--	--	Transposase family tnp2
XLOC_024454	NW_018744151.1	4209601	4209836	+	--	protein E6-like [Chenopodium quinoa]	--	SubName: Full=Uncharacterized protein {ECO:0000313|EMBL:KNA16575.1};	--	--	--
XLOC_028922	NW_018744626.1	5585558	5585888	.	--	--	--	--	--	--	--
XLOC_007886	NW_018742770.1	481766	482633	.	--	--	--	--	--	--	--
XLOC_007383	NW_018742738.1	11524303	11527016	+	--	--	--	--	--	--	--
XLOC_025767	NW_018744301.1	1783391	1784128	.	K14442 ATP-dependent RNA helicase DHX36 [EC:3.6.4.13] | (RefSeq) DExH-box ATP-dependent RNA helicase DExH6-like (A)	uncharacterized protein LOC110801210 [Spinacia oleracea]	RecName: Full=Putative ribonuclease H protein At1g65750; EC=3.1.26.4;	SubName: Full=Uncharacterized protein {ECO:0000313|EMBL:CCA66009.1};	FOG: Reverse transcriptase	GO:0046872,metal ion binding; GO:0004523,RNA-DNA hybrid ribonuclease activity; GO:0003676,nucleic acid binding	--
XLOC_017092	NW_018743555.1	2863414	2869116	+	--	PREDICTED: uncharacterized protein LOC104897580 [Beta vulgaris subsp. vulgaris]	--	SubName: Full=Galactokinase {ECO:0000313|EMBL:OEL33894.1};	--	GO:0005737,cytoplasm; GO:0004335,galactokinase activity; GO:0005534,galactose binding; GO:0005524,ATP binding; GO:0006012,galactose metabolic process	--
XLOC_019966	NW_018743850.1	2129724	2129956	.	--	--	--	--	--	--	--
XLOC_029978	NW_018744693.1	1012268	1012854	.	--	--	--	--	--	--	--
XLOC_033213	NW_018745003.1	2837419	2838197	-	K22399 pachytene checkpoint protein 2 | (RefSeq) pachytene checkpoint protein 2 homolog (A)	pachytene checkpoint protein 2 homolog [Chenopodium quinoa]	--	--	--	--	--
XLOC_025769	NW_018744301.1	3914217	3915525	.	--	--	--	--	--	--	--
XLOC_009934	NW_018742931.1	528355	530722	-	--	uncharacterized protein LOC110705418 [Chenopodium quinoa]	--	SubName: Full=Uncharacterized protein {ECO:0000313|EnsemblPlants:Bra006135.1-P};	--	--	--
XLOC_003963	NW_018742455.1	46302	48456	-	K00799 glutathione S-transferase [EC:2.5.1.18] | (RefSeq) uncharacterized protein LOC110786294 (A)	PREDICTED: uncharacterized protein LOC104896888 [Beta vulgaris subsp. vulgaris]	RecName: Full=Putative ribonuclease H protein At1g65750; EC=3.1.26.4;	SubName: Full=Uncharacterized protein {ECO:0000313|EMBL:CCA66054.1};	FOG: Reverse transcriptase	GO:0046872,metal ion binding; GO:0004523,RNA-DNA hybrid ribonuclease activity; GO:0003676,nucleic acid binding	--
XLOC_004674	NW_018742484.1	8239242	8243949	+	--	--	--	--	--	--	--
XLOC_022426	NW_018744026.1	4483867	4485764	+	--	uncharacterized protein LOC110720139 isoform X2 [Chenopodium quinoa]	--	--	--	--	--
XLOC_024638	NW_018744151.1	3224897	3227919	.	--	uncharacterized protein LOC110722023 [Chenopodium quinoa]	--	--	--	--	--
XLOC_009596	NW_018742914.1	6727165	6728229	+	--	--	--	--	--	--	Protein of unknown function (DUF1652)
XLOC_020038	NW_018743858.1	4741124	4742842	+	--	uncharacterized protein LOC110733204 [Chenopodium quinoa]	--	SubName: Full=Uncharacterized protein {ECO:0000313|EMBL:KNA25364.1};	--	GO:0016021,integral component of membrane	--
XLOC_010828	NW_018743014.1	641261	644490	-	--	--	--	--	--	--	--
XLOC_000825	NW_018742204.1	22045960	22046313	.	--	--	--	--	--	--	PRA1 family protein
XLOC_017570	NW_018743574.1	3092259	3095132	-	--	uncharacterized protein LOC110805289 [Spinacia oleracea]	--	--	--	--	--
XLOC_025161	NW_018744239.1	9891666	9892164	.	--	--	--	--	--	--	--
XLOC_010481	NW_018742974.1	1327508	1328206	.	--	--	--	--	--	--	--
XLOC_023510	NW_018744092.1	1069215	1069795	-	--	hypothetical protein SOVF_072910 [Spinacia oleracea]	RecName: Full=Large ribosomal RNA subunit accumulation protein YCED homolog 1, chloroplastic {ECO:0000305}; AltName: Full=23S rRNA accumulation protein YCED {ECO:0000250|UniProtKB:P0AB28}; AltName: Full=Protein DUF177A {ECO:0000303|PubMed:27574185}; Flags: Precursor;	SubName: Full=Uncharacterized protein {ECO:0000313|EMBL:KNA18209.1};	--	GO:0042644,chloroplast nucleoid; GO:0042254,ribosome biogenesis; GO:0009507,chloroplast	--
XLOC_006153	NW_018742634.1	821	18959	+	--	hypothetical protein VITISV_002825 [Vitis vinifera]	--	SubName: Full=Uncharacterized protein {ECO:0000313|EnsemblPlants:PGSC0003DMT400091537};	--	--	--
XLOC_030891	NW_018744830.1	743113	744386	.	--	--	--	--	--	--	Viral family 110
XLOC_001027	NW_018742205.1	7613743	7616197	+	--	PREDICTED: uncharacterized protein LOC104891773 [Beta vulgaris subsp. vulgaris]	--	SubName: Full=Uncharacterized protein {ECO:0000313|EMBL:KNA20515.1};	--	--	--
XLOC_038232	NW_018745542.1	1002922	1003959	.	--	--	--	--	--	--	--
XLOC_029452	NW_018744656.1	200545	201541	.	--	--	--	--	--	--	--
XLOC_035804	NW_018745291.1	235358	235891	.	--	--	--	--	--	--	--
XLOC_004881	NW_018742484.1	7809953	7810927	.	--	hypothetical protein SOVF_118660 [Spinacia oleracea]	--	SubName: Full=Uncharacterized protein {ECO:0000313|EMBL:KNA13221.1};	--	--	--
XLOC_017160	NW_018743572.1	744992	745579	-	--	uncharacterized protein LOC110688774 [Chenopodium quinoa]	--	SubName: Full=Uncharacterized protein {ECO:0000313|EMBL:KMS96022.1};	--	--	--
XLOC_017921	NW_018743608.1	250442	252166	.	--	uncharacterized protein LOC105631775 [Jatropha curcas]	--	SubName: Full=Uncharacterized protein {ECO:0000313|EMBL:KDP46199.1};	--	--	--
XLOC_010222	NW_018742963.1	2010221	2011155	.	--	--	--	--	--	--	--
XLOC_010767	NW_018742987.1	936613	936886	.	--	--	--	--	--	--	--
XLOC_019148	NW_018743783.1	3815800	3816138	.	--	--	--	--	--	--	--
XLOC_017809	NW_018743575.1	478584	479330	.	--	--	--	--	--	--	--
XLOC_025052	NW_018744239.1	5513279	5514217	-	--	--	--	--	--	--	--
XLOC_012060	NW_018743099.1	2334819	2335106	.	K02961 small subunit ribosomal protein S17 | (RefSeq) uncharacterized LOC103833230 (A)	hypothetical protein EUGRSUZ_J02069 [Eucalyptus grandis]	--	SubName: Full=Uncharacterized protein {ECO:0000313|EMBL:KCW52706.1};	--	--	--
XLOC_007927	NW_018742798.1	2038250	2040029	+	K11303 histone acetyltransferase 1 [EC:2.3.1.48] | (RefSeq) histone acetyltransferase type B catalytic subunit-like (A)	uncharacterized protein LOC110724885 [Chenopodium quinoa]	--	SubName: Full=NADH-ubiquinone reductase complex 1 MLRQ subunit {ECO:0000313|EMBL:KVD98163.1}; Flags: Fragment;	--	GO:0016021,integral component of membrane	NADH-ubiquinone reductase complex 1 MLRQ subunit
XLOC_015602	NW_018743331.1	1448538	1454223	-	--	--	--	--	--	--	--
XLOC_034943	NW_018745177.1	3191589	3191811	.	--	uncharacterized protein LOC110692551 [Chenopodium quinoa]	--	--	--	--	--
XLOC_019964	NW_018743850.1	2063445	2063988	.	--	--	--	--	--	--	--
XLOC_032941	NW_018745000.1	2212995	2214849	.	--	--	--	--	--	--	--
XLOC_013791	NW_018743217.1	620226	621157	.	K10664 E3 ubiquitin-protein ligase ATL6/9/15/31/42/55 [EC:2.3.2.27] | (RefSeq) E3 ubiquitin-protein ligase ATL6-like (A)	PREDICTED: RING-H2 finger protein ATL73-like [Beta vulgaris subsp. vulgaris]	RecName: Full=RING-H2 finger protein ATL80; EC=2.3.2.27 {ECO:0000305}; AltName: Full=RING-type E3 ubiquitin transferase ATL80 {ECO:0000305};	SubName: Full=Uncharacterized protein {ECO:0000313|EMBL:KNA05265.1};	FOG: Predicted E3 ubiquitin ligase	GO:0010200,response to chitin; GO:0043161,proteasome-mediated ubiquitin-dependent protein catabolic process; GO:0016021,integral component of membrane; GO:0006952,defense response; GO:0070417,cellular response to cold; GO:0005886,plasma membrane; GO:0010966,regulation of phosphate transport; GO:0046872,metal ion binding; GO:0061630,ubiquitin protein ligase activity; GO:0009909,regulation of flowe…	--
XLOC_016590	NW_018743476.1	2659582	2660508	-	--	--	--	--	--	--	--
XLOC_015327	NW_018743292.1	8285002	8285483	.	--	--	--	--	--	--	--
XLOC_007310	NW_018742733.1	2263666	2264358	.	K02961 small subunit ribosomal protein S17 | (RefSeq) 30S ribosomal protein S17, chloroplastic-like (A)	30S ribosomal protein S17, chloroplastic-like [Chenopodium quinoa]	--	--	--	--	--
XLOC_019091	NW_018743783.1	2319486	2325072	+	K10740 replication factor A3 | (RefSeq) replication protein A 14 kDa subunit B-like (A)	replication protein A 14 kDa subunit B-like [Chenopodium quinoa]	RecName: Full=Proteasome subunit beta type-2-B; EC=3.4.25.1; AltName: Full=20S proteasome beta subunit D-2; AltName: Full=Proteasome component GA; AltName: Full=Proteasome subunit beta type-4;	RecName: Full=Proteasome subunit beta type {ECO:0000256|RuleBase:RU004203}; EC=3.4.25.1 {ECO:0000256|RuleBase:RU004203};	20S proteasome, regulatory subunit beta type PSMB2/PRE1	GO:0005737,cytoplasm; GO:0051603,proteolysis involved in cellular protein catabolic process; GO:0005634,nucleus; GO:0019774,proteasome core complex, beta-subunit complex; GO:0004298,threonine-type endopeptidase activity	Proteasome subunit
XLOC_000761	NW_018742204.1	7721568	7722323	.	K20843 hydroxyproline O-galactosyltransferase 2/3/4/5/6 [EC:2.4.1.-] | (RefSeq) hydroxyproline O-galactosyltransferase GALT2 (A)	PREDICTED: uncharacterized protein LOC108482565 [Gossypium arboreum]	--	SubName: Full=uncharacterized protein LOC107901873 {ECO:0000313|RefSeq:XP_016683528.1};	--	--	--
XLOC_003191	NW_018742410.1	70041	70531	.	--	hypothetical protein SOVF_204160 [Spinacia oleracea]	--	SubName: Full=Uncharacterized protein {ECO:0000313|EMBL:KNA03966.1};	--	--	--
XLOC_035849	NW_018745311.1	626282	627447	.	--	--	--	--	--	--	--
XLOC_039513	NW_018745684.1	5658314	5658772	.	--	--	--	--	--	--	--
XLOC_036047	NW_018745323.1	2339154	2339904	.	--	hypothetical protein BVRB_6g146560 [Beta vulgaris subsp. vulgaris]	--	--	--	--	--
XLOC_035806	NW_018745291.1	887009	887637	.	--	hypothetical protein BVRB_2g043880 [Beta vulgaris subsp. vulgaris]	--	SubName: Full=Uncharacterized protein {ECO:0000313|EMBL:EMJ17557.1};	--	--	--
XLOC_027308	NW_018744502.1	733517	733779	.	--	--	--	--	--	--	--
XLOC_012622	NW_018743175.1	1900094	1902034	.	K11420 euchromatic histone-lysine N-methyltransferase [EC:2.1.1.43] | (RefSeq) histone-lysine N-methyltransferase, H3 lysine-9 specific SUVH6-like (A)	histone-lysine N-methyltransferase, H3 lysine-9 specific SUVH6-like [Chenopodium quinoa]	RecName: Full=Histone-lysine N-methyltransferase, H3 lysine-9 specific SUVH6; EC=2.1.1.43; AltName: Full=Histone H3-K9 methyltransferase 6; Short=H3-K9-HMTase 6; AltName: Full=Protein SET DOMAIN GROUP 23; AltName: Full=Suppressor of variegation 3-9 homolog protein 6; Short=Su(var)3-9 homolog protein 6;	SubName: Full=Uncharacterized protein {ECO:0000313|EMBL:KNA09151.1};	--	GO:0018024,histone-lysine N-methyltransferase activity; GO:0008327,methyl-CpG binding; GO:0005634,nucleus; GO:0010429,methyl-CpNpN binding; GO:0010428,methyl-CpNpG binding; GO:0016571,histone methylation; GO:0008270,zinc ion binding; GO:0008168,methyltransferase activity; GO:0000775,chromosome, centromeric region	--
XLOC_000800	NW_018742204.1	18391386	18391683	.	K23280 rhamnogalacturonan I rhamnosyltransferase [EC:2.4.1.351] | (RefSeq) uncharacterized protein LOC101257103 isoform X1 (A)	uncharacterized protein LOC110721222 [Chenopodium quinoa]	--	SubName: Full=Putative GAG-pre-integrase domain, Gag-polypeptide of LTR copia-type {ECO:0000313|EMBL:OTG28537.1};	--	--	--
XLOC_029912	NW_018744693.1	2276273	2280645	-	K03006 DNA-directed RNA polymerase II subunit RPB1 [EC:2.7.7.6] | (RefSeq) LOW QUALITY PROTEIN: DNA-directed RNA polymerase II subunit 1-like (A)	Putative gag-pol polyprotein, identical [Solanum demissum]	RecName: Full=Retrovirus-related Pol polyprotein from transposon TNT 1-94; Includes: RecName: Full=Protease; EC=3.4.23.-; Includes: RecName: Full=Reverse transcriptase; EC=2.7.7.49; Includes: RecName: Full=Endonuclease;	SubName: Full=Putative gag-pol polyprotein, identical {ECO:0000313|EMBL:AAT38758.1};	FOG: Transposon-encoded proteins with TYA, reverse transcriptase, integrase domains in various combinations	GO:0004519,endonuclease activity; GO:0015074,DNA integration; GO:0004190,aspartic-type endopeptidase activity; GO:0008270,zinc ion binding; GO:0003676,nucleic acid binding; GO:0003964,RNA-directed DNA polymerase activity	--
XLOC_004849	NW_018742484.1	1657841	1658156	.	--	uncharacterized protein LOC110737589 [Chenopodium quinoa]	--	--	--	--	--
XLOC_010533	NW_018742980.1	997803	999972	-	--	uncharacterized protein LOC110734930 [Chenopodium quinoa]	--	SubName: Full=Uncharacterized protein {ECO:0000313|EMBL:KNA15429.1}; Flags: Fragment;	FOG: Transposon-encoded proteins with TYA, reverse transcriptase, integrase domains in various combinations	--	--
XLOC_003048	NW_018742393.1	376798	377663	.	--	--	--	--	--	--	--
XLOC_023617	NW_018744092.1	1386757	1386961	.	--	--	--	--	--	--	--
XLOC_038590	NW_018745649.1	101175	102340	+	--	--	--	--	--	--	--
XLOC_012843	NW_018743197.1	1049521	1052389	-	--	PREDICTED: uncharacterized protein LOC104895014 [Beta vulgaris subsp. vulgaris]	--	--	--	--	--
XLOC_016838	NW_018743514.1	1558862	1562481	+	--	PREDICTED: uncharacterized protein LOC104894368 [Beta vulgaris subsp. vulgaris]	--	SubName: Full=Uncharacterized protein {ECO:0000313|EMBL:OMO88972.1};	--	--	--
XLOC_016072	NW_018743389.1	5355946	5357011	.	--	--	--	--	--	--	--
XLOC_010319	NW_018742966.1	1221570	1222729	-	--	hypothetical protein BVRB_5g119530 [Beta vulgaris subsp. vulgaris]	--	SubName: Full=Uncharacterized protein {ECO:0000313|EMBL:KNA23763.1};	--	--	--
XLOC_011251	NW_018743033.1	2016815	2017064	.	--	--	--	--	--	--	--
XLOC_025734	NW_018744301.1	2963051	3001952	-	K19984 exocyst complex component 5 | (RefSeq) uncharacterized protein LOC113272286 (A)	hypothetical protein TSUD_157590 [Trifolium subterraneum]	RecName: Full=Putative AC transposase; AltName: Full=ORFA;	SubName: Full=zinc finger BED domain-containing protein RICESLEEPER 2-like {ECO:0000313|RefSeq:XP_016668820.1};	Tam3-transposase (Ac family)	GO:0006310,DNA recombination; GO:0046983,protein dimerization activity; GO:0032196,transposition; GO:0003677,DNA binding	hAT family C-terminal dimerisation region
XLOC_026525	NW_018744369.1	1087988	1088525	.	--	--	--	--	--	--	--
XLOC_038132	NW_018745533.1	599275	599617	.	--	--	--	--	--	--	--
XLOC_019961	NW_018743850.1	1573794	1574569	.	--	uncharacterized protein LOC110685610 [Chenopodium quinoa]	--	SubName: Full=Uncharacterized protein {ECO:0000313|EMBL:KYP39696.1};	Uncharacterized conserved protein	--	Oxidoreductase-like protein, N-terminal
XLOC_032944	NW_018745000.1	3729873	3730105	.	K01768 adenylate cyclase [EC:4.6.1.1] | (RefSeq) LOW QUALITY PROTEIN: uncharacterized protein LOC107911085 (A)	reverse transcriptase-like protein, partial [Amaranthus hybridus]	RecName: Full=Retrovirus-related Pol polyprotein from transposon TNT 1-94; Includes: RecName: Full=Protease; EC=3.4.23.-; Includes: RecName: Full=Reverse transcriptase; EC=2.7.7.49; Includes: RecName: Full=Endonuclease;	SubName: Full=Reverse transcriptase-like protein {ECO:0000313|EMBL:AAG44322.1}; Flags: Fragment;	FOG: Transposon-encoded proteins with TYA, reverse transcriptase, integrase domains in various combinations	GO:0004519,endonuclease activity; GO:0015074,DNA integration; GO:0004190,aspartic-type endopeptidase activity; GO:0008270,zinc ion binding; GO:0003676,nucleic acid binding; GO:0003964,RNA-directed DNA polymerase activity	--
XLOC_022102	NW_018743977.1	2324586	2325264	+	--	--	--	--	--	--	--
XLOC_016059	NW_018743389.1	499427	499919	.	--	--	--	--	--	--	--
XLOC_015682	NW_018743331.1	9256224	9259220	-	--	uncharacterized protein LOC110709088 isoform X1 [Chenopodium quinoa]	--	--	--	--	--
XLOC_028961	NW_018744633.1	2839921	2840773	+	K12833 pre-mRNA branch site protein p14 | (RefSeq) RNA-binding protein BRN2-like isoform X1 (A)	hypothetical protein BVRB_4g073840 [Beta vulgaris subsp. vulgaris]	--	SubName: Full=Uncharacterized protein {ECO:0000313|EMBL:KDP43175.1};	--	--	--
XLOC_006732	NW_018742707.1	717958	721859	-	--	uncharacterized protein LOC110691956 [Chenopodium quinoa]	--	--	--	--	--
XLOC_028120	NW_018744593.1	430850	432033	+	--	hypothetical protein BVRB_9g211520 [Beta vulgaris subsp. vulgaris]	--	SubName: Full=Uncharacterized protein {ECO:0000313|EMBL:KMS96812.1};	--	--	Poly(hydroxyalcanoate) granule associated protein (phasin)
XLOC_035130	NW_018745240.1	1273219	1283125	-	--	hypothetical protein BVRB_4g084420 [Beta vulgaris subsp. vulgaris]	--	SubName: Full=Uncharacterized protein {ECO:0000313|EMBL:KMT13351.1};	--	GO:0016021,integral component of membrane; GO:0006979,response to oxidative stress	--
XLOC_011254	NW_018743033.1	2734768	2735160	.	--	--	--	--	--	--	--
XLOC_012637	NW_018743175.1	4149350	4149748	.	K23222 nuclease HARBI1 [EC:3.1.-.-] | (RefSeq) uncharacterized LOC107788612 (A)	uncharacterized protein LOC110735287 [Chenopodium quinoa]	--	SubName: Full=Os11g0577650 protein {ECO:0000313|EMBL:BAT14577.1};	Predicted transposase	GO:0016021,integral component of membrane	--
XLOC_029680	NW_018744662.1	4298721	4303419	-	K16732 protein regulator of cytokinesis 1 | (RefSeq) 65-kDa microtubule-associated protein 3-like (A)	65-kDa microtubule-associated protein 3-like [Chenopodium quinoa]	RecName: Full=65-kDa microtubule-associated protein 3; Short=AtMAP65-3; AltName: Full=Protein PLEIADE;	SubName: Full=Uncharacterized protein {ECO:0000313|EMBL:KNA17717.1};	Microtubule-associated protein essential for anaphase spindle elongation	GO:0000911,cytokinesis by cell plate formation; GO:0009524,phragmoplast; GO:0055028,cortical microtubule; GO:0008017,microtubule binding; GO:0000280,nuclear division; GO:0009624,response to nematode; GO:0009574,preprophase band; GO:0046785,microtubule polymerization; GO:0052096,formation by symbiont of syncytium involving giant cell for nutrient acquisition from host; GO:0000226,microtubule cytos…	--
XLOC_025166	NW_018744239.1	10820600	10820922	.	--	uncharacterized protein LOC110687174 [Chenopodium quinoa]	--	SubName: Full=Uncharacterized protein {ECO:0000313|EnsemblPlants:Bo17902s010.1};	--	--	--
XLOC_039158	NW_018745684.1	8573709	8578898	+	--	--	--	--	--	--	--
XLOC_019599	NW_018743850.1	593263	593898	+	--	--	--	--	--	--	--
XLOC_002560	NW_018742345.1	8431866	8432104	.	--	uncharacterized protein LOC110738963 [Chenopodium quinoa]	--	--	--	--	--
XLOC_010486	NW_018742974.1	3662337	3662686	.	--	hypothetical protein SOVF_010160 [Spinacia oleracea]	--	SubName: Full=Uncharacterized protein {ECO:0000313|EMBL:KNA25053.1};	--	--	--
XLOC_004130	NW_018742461.1	2991966	2992863	+	--	--	--	--	--	--	--
XLOC_016554	NW_018743448.1	1694208	1694571	.	--	protein FAR1-RELATED SEQUENCE 5-like isoform X1 [Chenopodium quinoa]	--	--	--	--	--
XLOC_025122	NW_018744239.1	1258675	1259131	.	--	--	--	--	--	--	--
XLOC_014092	NW_018743252.1	5307343	5307602	.	--	--	--	--	--	--	--
XLOC_038724	NW_018745650.1	1576196	1577353	.	--	uncharacterized protein LOC110776315 [Spinacia oleracea]	--	SubName: Full=uncharacterized protein LOC104211089 {ECO:0000313|RefSeq:XP_009758389.1};	--	--	--
XLOC_012639	NW_018743175.1	4481672	4482626	.	--	--	--	--	--	--	--
XLOC_002381	NW_018742329.1	7556851	7558213	.	--	hypothetical protein SOVF_213480 [Spinacia oleracea]	--	SubName: Full=Uncharacterized protein {ECO:0000313|EMBL:KNA02981.1};	--	--	--
XLOC_008547	NW_018742817.1	62960	64860	.	K14857 AdoMet-dependent rRNA methyltransferase SPB1 [EC:2.1.1.-] | (RefSeq) putative rRNA methyltransferase (A)	uncharacterized protein LOC110739421 [Chenopodium quinoa]	--	SubName: Full=Uncharacterized protein {ECO:0000313|EMBL:CCA66009.1};	FOG: Reverse transcriptase	GO:0004523,RNA-DNA hybrid ribonuclease activity; GO:0003676,nucleic acid binding	--
XLOC_026616	NW_018744456.1	2	566	.	--	--	--	--	--	--	--
XLOC_007328	NW_018742738.1	262154	266883	+	--	uncharacterized protein LOC110697159 [Chenopodium quinoa]	--	SubName: Full=Uncharacterized protein {ECO:0000313|EMBL:KMS98944.1};	--	GO:0016021,integral component of membrane; GO:0004222,metalloendopeptidase activity	--
XLOC_002052	NW_018742292.1	2338634	2340144	-	--	--	--	--	--	--	--
XLOC_016250	NW_018743391.1	2598028	2598697	.	--	--	--	--	--	--	--
XLOC_015805	NW_018743365.1	224961	227676	-	K12176 COP9 signalosome complex subunit 2 | (RefSeq) COP9 signalosome complex subunit 2 (A)	PREDICTED: COP9 signalosome complex subunit 2 [Ziziphus jujuba]	RecName: Full=COP9 signalosome complex subunit 2; Short=Signalosome subunit 2; AltName: Full=Protein FUSCA 12;	SubName: Full=Uncharacterized protein {ECO:0000313|EMBL:EFH57125.1};	--	GO:0009585,red, far-red light phototransduction; GO:0000338,protein deneddylation; GO:0005829,cytosol; GO:0003714,transcription corepressor activity; GO:0045892,negative regulation of transcription, DNA-templated; GO:0030163,protein catabolic process; GO:0005634,nucleus; GO:0007275,multicellular organism development; GO:0008180,COP9 signalosome	--
XLOC_028272	NW_018744593.1	447192	447396	.	--	--	--	--	--	--	--
XLOC_012236	NW_018743175.1	1312738	1314870	+	K12447 UDP-sugar pyrophosphorylase [EC:2.7.7.64] | (RefSeq) UDP-sugar pyrophosphorylase-like isoform X1 (A)	PREDICTED: uncharacterized protein LOC107017115 [Solanum pennellii]	--	SubName: Full=Putative gag-polypeptide of LTR copia-type {ECO:0000313|EMBL:OTF95102.1};	FOG: Transposon-encoded proteins with TYA, reverse transcriptase, integrase domains in various combinations	--	--
XLOC_023080	NW_018744072.1	306321	308148	-	--	--	--	--	--	--	--
XLOC_027738	NW_018744537.1	337863	338316	.	--	--	--	--	--	--	--
XLOC_024826	NW_018744210.1	13124	13795	.	--	PREDICTED: cysteine-rich receptor-like protein kinase 10 [Beta vulgaris subsp. vulgaris]	RecName: Full=Cysteine-rich receptor-like protein kinase 10; Short=Cysteine-rich RLK10; EC=2.7.11.-; AltName: Full=Receptor-like protein kinase 4; Flags: Precursor;	SubName: Full=Cysteine-rich receptor-like protein kinase 25 {ECO:0000313|EMBL:PHT49652.1};	--	GO:0006468,protein phosphorylation; GO:0016021,integral component of membrane; GO:0004674,protein serine/threonine kinase activity; GO:0042742,defense response to bacterium; GO:0005886,plasma membrane; GO:0005524,ATP binding	--
XLOC_031871	NW_018744883.1	215365	216365	.	--	--	--	--	--	--	--
XLOC_022321	NW_018743979.1	4753353	4753973	.	K19984 exocyst complex component 5 | (RefSeq) uncharacterized protein LOC113272286 (A)	zinc finger BED domain-containing protein RICESLEEPER 2-like [Chenopodium quinoa]	RecName: Full=Putative AC9 transposase;	SubName: Full=Uncharacterized protein {ECO:0000313|EMBL:EMJ14584.1};	Tam3-transposase (Ac family)	GO:0006310,DNA recombination; GO:0046983,protein dimerization activity; GO:0032196,transposition; GO:0003677,DNA binding	--
XLOC_023492	NW_018744092.1	348670	352891	-	K15503 serine/threonine-protein phosphatase 6 regulatory ankyrin repeat subunit B | (RefSeq) uncharacterized LOC105779167 (A)	hypothetical protein BVRB_9g203690 [Beta vulgaris subsp. vulgaris]	--	SubName: Full=Uncharacterized protein {ECO:0000313|EMBL:KMT16472.1};	--	GO:2000031,regulation of salicylic acid mediated signaling pathway; GO:0016021,integral component of membrane; GO:0071446,cellular response to salicylic acid stimulus; GO:0031347,regulation of defense response	--
XLOC_033009	NW_018745003.1	1633446	1638075	+	--	hypothetical protein BVRB_8g196240 [Beta vulgaris subsp. vulgaris]	--	SubName: Full=Uncharacterized protein {ECO:0000313|EMBL:CBI28080.3};	--	--	--
XLOC_034808	NW_018745174.1	921312	922751	.	K12874 intron-binding protein aquarius | (RefSeq) LOW QUALITY PROTEIN: intron-binding protein aquarius-like (A)	uncharacterized protein LOC110725370 [Chenopodium quinoa]	RecName: Full=Putative ribonuclease H protein At1g65750; EC=3.1.26.4;	SubName: Full=Uncharacterized protein {ECO:0000313|EMBL:KMS97072.1};	FOG: Reverse transcriptase	GO:0046872,metal ion binding; GO:0004523,RNA-DNA hybrid ribonuclease activity; GO:0003676,nucleic acid binding	zinc-binding in reverse transcriptase
XLOC_009026	NW_018742881.1	803087	803608	.	--	--	--	--	--	--	--
XLOC_038478	NW_018745617.1	1312058	1316217	+	--	uncharacterized protein LOC110691706 [Chenopodium quinoa]	--	--	--	--	--
XLOC_021433	NW_018743920.1	5077375	5077731	.	--	--	--	--	--	--	--
XLOC_017031	NW_018743537.1	15029	15561	.	K02703 photosystem II P680 reaction center D1 protein [EC:1.10.3.9] | (Kazusa) Lj0g3v0104129.1; - (A)	photosystem II 32 kDa protein, partial (chloroplast) [Beta vulgaris subsp. maritima]	RecName: Full=Photosystem II protein D1 {ECO:0000255|HAMAP-Rule:MF_01379}; Short=PSII D1 protein {ECO:0000255|HAMAP-Rule:MF_01379}; EC=1.10.3.9 {ECO:0000255|HAMAP-Rule:MF_01379}; AltName: Full=Photosystem II Q(B) protein {ECO:0000255|HAMAP-Rule:MF_01379}; Flags: Precursor;	SubName: Full=Uncharacterized protein {ECO:0000313|EnsemblPlants:PGSC0003DMT400094795};	--	GO:0009535,chloroplast thylakoid membrane; GO:0016168,chlorophyll binding; GO:0009523,photosystem II; GO:0016021,integral component of membrane; GO:0018298,protein-chromophore linkage; GO:0009635,response to herbicide; GO:0045156,electron transporter, transferring electrons within the cyclic electron transport pathway of photosynthesis activity; GO:0046872,metal ion binding; GO:0009772,photosynth…	--
XLOC_034678	NW_018745170.1	743717	744605	.	K13449 pathogenesis-related protein 1 | (RefSeq) pathogenesis-related protein PRMS (A)	hypothetical protein BVRB_2g033660 [Beta vulgaris subsp. vulgaris]	RecName: Full=Pathogenesis-related protein PR-1; Flags: Precursor;	SubName: Full=Uncharacterized protein {ECO:0000313|EMBL:EXB75139.1};	Defense-related protein containing SCP domain	GO:0006952,defense response; GO:0005576,extracellular region; GO:0009607,response to biotic stimulus	--
XLOC_027821	NW_018744560.1	1313274	1313788	.	--	--	--	--	--	--	--
XLOC_026249	NW_018744348.1	266102	267944	.	K15078 structure-specific endonuclease subunit SLX1 [EC:3.6.1.-] | (RefSeq) putative disease resistance protein RGA1 (A)	putative disease resistance protein RGA1 [Chenopodium quinoa]	RecName: Full=Disease resistance protein RGA2; AltName: Full=Blight resistance protein RPI; AltName: Full=RGA2-blb;	SubName: Full=NBS-LRR type resistance protein {ECO:0000313|EMBL:ABJ99599.1};	Apoptotic ATPase	GO:0006952,defense response; GO:0005524,ATP binding; GO:0043531,ADP binding	Rx N-terminal domain
XLOC_022035	NW_018743974.1	39363	41162	-	--	uncharacterized protein LOC110738482 [Chenopodium quinoa]	--	SubName: Full=Uncharacterized protein {ECO:0000313|EMBL:KNA08208.1};	--	GO:0046872,metal ion binding	--
XLOC_025384	NW_018744284.1	501994	502253	.	--	--	--	--	--	--	--
XLOC_008333	NW_018742815.1	295924	298222	-	K15255 ATP-dependent DNA helicase PIF1 [EC:3.6.4.12] | (RefSeq) ATP-dependent DNA helicase pfh1-like (A)	ATP-dependent DNA helicase pfh1-like [Chenopodium quinoa]	--	--	--	--	--
XLOC_002828	NW_018742390.1	1485739	1487393	-	--	--	--	--	--	--	--
XLOC_026247	NW_018744348.1	175841	176264	.	--	--	--	--	--	--	--
XLOC_026707	NW_018744460.1	2819852	2821889	+	--	--	--	--	--	--	--
XLOC_023336	NW_018744080.1	1249593	1249936	.	--	--	--	--	--	--	--
XLOC_025634	NW_018744297.1	1320194	1321331	+	--	--	--	--	--	--	Darcynin, domain of unknown function
XLOC_030138	NW_018744704.1	1841475	1869878	-	K12818 ATP-dependent RNA helicase DHX8/PRP22 [EC:3.6.4.13] | (RefSeq) probable pre-mRNA-splicing factor ATP-dependent RNA helicase DEAH4 (A)	probable pre-mRNA-splicing factor ATP-dependent RNA helicase DEAH4 [Chenopodium quinoa]	RecName: Full=Probable pre-mRNA-splicing factor ATP-dependent RNA helicase DEAH4 {ECO:0000305}; EC=3.6.4.13; AltName: Full=DEAH RNA helicase homolog PRP22 {ECO:0000305};	SubName: Full=Uncharacterized protein {ECO:0000313|EMBL:KNA17592.1};	--	GO:0005737,cytoplasm; GO:0005730,nucleolus; GO:0004004,ATP-dependent RNA helicase activity; GO:0005524,ATP binding; GO:0003723,RNA binding; GO:0005681,spliceosomal complex; GO:0008380,RNA splicing; GO:0006396,RNA processing; GO:0006397,mRNA processing	--
XLOC_020350	NW_018743897.1	12831	17787	+	K16900 two pore calcium channel protein, plant | (RefSeq) two pore calcium channel protein 1B-like (A)	two pore calcium channel protein 1B-like [Chenopodium quinoa]	RecName: Full=Two pore calcium channel protein 1A; AltName: Full=Voltage-dependent calcium channel protein TPC1A; Short=NtTPC1A;	SubName: Full=Uncharacterized protein {ECO:0000313|EMBL:KNA19477.1};	Voltage-gated Ca2+ channels, alpha1 subunits	GO:0006952,defense response; GO:0034765,regulation of ion transmembrane transport; GO:0005245,voltage-gated calcium channel activity; GO:0016021,integral component of membrane; GO:0005509,calcium ion binding	--
XLOC_011097	NW_018743021.1	2344638	2345157	.	K00799 glutathione S-transferase [EC:2.5.1.18] | (RefSeq) uncharacterized protein LOC110786294 (A)	uncharacterized protein LOC110727702 [Chenopodium quinoa]	--	SubName: Full=Uncharacterized protein {ECO:0000313|EMBL:CCA66040.1};	--	GO:0003676,nucleic acid binding	--
XLOC_019562	NW_018743828.1	257821	258347	.	K01528 dynamin GTPase [EC:3.6.5.5] | (Kazusa) Lj0g3v0199559.2; - (A)	uncharacterized protein LOC110722495 [Chenopodium quinoa]	RecName: Full=Retrovirus-related Pol polyprotein from transposon RE1; AltName: Full=Retro element 1 {ECO:0000303|PubMed:10689195}; Short=AtRE1 {ECO:0000303|PubMed:10689195}; Includes: RecName: Full=Protease RE1; EC=3.4.23.-; Includes: RecName: Full=Reverse transcriptase RE1; EC=2.7.7.49; Includes: RecName: Full=Endonuclease RE1;	SubName: Full=Putative ovule protein {ECO:0000313|EMBL:JAP22011.1};	FOG: Transposon-encoded proteins with TYA, reverse transcriptase, integrase domains in various combinations	GO:0006310,DNA recombination; GO:0004519,endonuclease activity; GO:0015074,DNA integration; GO:0004190,aspartic-type endopeptidase activity; GO:0003676,nucleic acid binding; GO:0003964,RNA-directed DNA polymerase activity; GO:0046872,metal ion binding	--
XLOC_023255	NW_018744080.1	1346892	1350831	-	--	uncharacterized protein LOC110691592 isoform X2 [Chenopodium quinoa]	--	--	--	--	Polyprenyl synthetase
XLOC_011145	NW_018743032.1	3190570	3195426	-	K04507 calcyclin binding protein | (RefSeq) calcyclin-binding protein-like (A)	calcyclin-binding protein-like [Chenopodium quinoa]	--	SubName: Full=Uncharacterized protein {ECO:0000313|EMBL:KNA09424.1};	Calcyclin-binding protein CacyBP	--	CS domain
XLOC_023717	NW_018744093.1	3801639	3802043	.	--	--	--	--	--	--	--
XLOC_004495	NW_018742483.1	772907	773432	.	--	--	--	--	--	--	--
XLOC_035061	NW_018745207.1	29727	30402	.	--	--	--	--	--	--	--
XLOC_002261	NW_018742329.1	6722431	6726659	+	--	--	--	--	--	--	--
XLOC_026181	NW_018744315.1	299865	300540	-	--	--	--	--	--	--	--
XLOC_021703	NW_018743946.1	790852	791282	.	--	LOW QUALITY PROTEIN: protein phosphatase 2C 29-like [Chenopodium quinoa]	RecName: Full=Protein phosphatase 2C 29; Short=AtPP2C29; EC=3.1.3.16; AltName: Full=Protein POLTERGEIST-LIKE 1; AltName: Full=Protein phosphatase 2C PLL1; Short=PP2C PLL1;	SubName: Full=Uncharacterized protein {ECO:0000313|EMBL:KNA10760.1};	--	GO:0009826,unidimensional cell growth; GO:0010074,maintenance of meristem identity; GO:0005634,nucleus; GO:0005543,phospholipid binding; GO:0004722,protein serine/threonine phosphatase activity; GO:0006355,regulation of transcription, DNA-templated; GO:0009933,meristem structural organization; GO:0005886,plasma membrane; GO:0046872,metal ion binding; GO:0007275,multicellular organism development	--
XLOC_007531	NW_018742738.1	13596298	13596753	.	--	uncharacterized protein LOC110737109 [Chenopodium quinoa]	--	--	--	--	--
XLOC_002734	NW_018742381.1	16843	17561	.	--	--	--	--	--	--	--
XLOC_017777	NW_018743574.1	6847604	6847832	.	--	uncharacterized protein LOC110700740 [Chenopodium quinoa]	--	SubName: Full=Uncharacterized protein {ECO:0000313|EMBL:KNA14823.1}; Flags: Fragment;	--	GO:0003676,nucleic acid binding	--
XLOC_012813	NW_018743196.1	458710	459665	.	--	--	--	--	--	--	--
XLOC_006302	NW_018742651.1	2490243	2490615	.	--	--	--	--	--	--	--
XLOC_000770	NW_018742204.1	10859631	10860125	.	--	hypothetical protein SOVF_156110 [Spinacia oleracea]	RecName: Full=Antimicrobial peptide 2; Short=AMP2; Contains: RecName: Full=Antimicrobial peptide 1; Short=AMP1; Flags: Precursor;	SubName: Full=Uncharacterized protein {ECO:0000313|EMBL:KNA09156.1};	--	GO:0050832,defense response to fungus; GO:0031640,killing of cells of other organism; GO:0008061,chitin binding; GO:0042742,defense response to bacterium	--
XLOC_002079	NW_018742309.1	316870	322654	+	--	--	--	--	--	--	--
XLOC_035403	NW_018745281.1	3269972	3272725	+	--	--	--	--	--	--	--
XLOC_009992	NW_018742951.1	5081942	5082703	+	--	uncharacterized protein LOC110736998 isoform X4 [Chenopodium quinoa]	--	--	--	--	--
XLOC_015702	NW_018743331.1	3973118	3973716	.	K00799 glutathione S-transferase [EC:2.5.1.18] | (RefSeq) uncharacterized protein LOC110786294 (A)	uncharacterized protein LOC110734081 [Chenopodium quinoa]	--	SubName: Full=Uncharacterized protein {ECO:0000313|EMBL:CCA66054.1};	FOG: Reverse transcriptase	GO:0003676,nucleic acid binding	--
XLOC_025381	NW_018744284.1	3099667	3101804	-	K17604 zinc finger SWIM domain-containing protein 3 | (RefSeq) protein FAR-RED IMPAIRED RESPONSE 1-like isoform X1 (A)	protein FAR-RED IMPAIRED RESPONSE 1-like [Chenopodium quinoa]	RecName: Full=Protein FAR-RED IMPAIRED RESPONSE 1;	SubName: Full=Uncharacterized protein {ECO:0000313|EnsemblPlants:HORVU6Hr1G055990.2};	--	GO:0009639,response to red or far red light; GO:0009585,red, far-red light phototransduction; GO:0003700,DNA-binding transcription factor activity; GO:0005634,nucleus; GO:0010218,response to far red light; GO:0042753,positive regulation of circadian rhythm; GO:0008270,zinc ion binding; GO:0010017,red or far-red light signaling pathway; GO:0010018,far-red light signaling pathway; GO:0045893,positi…	MULE transposase domain
XLOC_027351	NW_018744504.1	485603	493645	+	K03283 heat shock 70kDa protein 1/2/6/8 | (RefSeq) heat shock cognate 70 kDa protein 2-like isoform X1 (A)	uncharacterized protein LOC110721916 [Chenopodium quinoa]	--	SubName: Full=Uncharacterized protein {ECO:0000313|EMBL:KNA20402.1};	--	--	--
XLOC_030575	NW_018744757.1	1250017	1251122	+	--	--	--	--	--	--	--
XLOC_002840	NW_018742390.1	6330684	6331823	-	K21437 ankyrin repeat domain-containing protein 13 | (RefSeq) uncharacterized protein LOC112523844 (A)	zinc finger BED domain-containing protein RICESLEEPER 2-like [Chenopodium quinoa]	RecName: Full=Zinc finger BED domain-containing protein RICESLEEPER 2; AltName: Full=Transposase-like protein RICESLEEPER 2;	SubName: Full=Uncharacterized protein {ECO:0000313|EMBL:KNA05978.1}; Flags: Fragment;	Tam3-transposase (Ac family)	GO:0003700,DNA-binding transcription factor activity; GO:0005634,nucleus; GO:0009791,post-embryonic development; GO:0006357,regulation of transcription by RNA polymerase II; GO:0000977,RNA polymerase II regulatory region sequence-specific DNA binding; GO:0046983,protein dimerization activity; GO:0046872,metal ion binding; GO:0006351,transcription, DNA-templated	--
XLOC_039104	NW_018745684.1	5784209	5786033	+	--	--	--	--	--	--	--
XLOC_002077	NW_018742306.1	373373	373888	.	--	--	--	--	--	--	--
XLOC_002166	NW_018742309.1	1887807	1888288	.	K19984 exocyst complex component 5 | (RefSeq) uncharacterized protein LOC113272286 (A)	zinc finger BED domain-containing protein RICESLEEPER 1-like [Spinacia oleracea]	RecName: Full=Putative AC transposase; AltName: Full=ORFA;	SubName: Full=Uncharacterized protein {ECO:0000313|EMBL:KNA05978.1}; Flags: Fragment;	Tam3-transposase (Ac family)	GO:0006310,DNA recombination; GO:0046983,protein dimerization activity; GO:0032196,transposition; GO:0003677,DNA binding	--
XLOC_024354	NW_018744143.1	1245972	1246946	.	--	--	--	--	--	--	--
XLOC_019688	NW_018743850.1	4925728	4927526	+	--	zinc finger MYM-type protein 1-like [Chenopodium quinoa]	--	--	--	--	--
XLOC_016191	NW_018743391.1	1483672	1483973	-	--	--	--	--	--	--	--
XLOC_031000	NW_018744835.1	2077617	2077848	.	--	--	--	--	--	--	--
XLOC_036352	NW_018745403.1	554548	556854	.	--	--	--	--	--	--	--
XLOC_007950	NW_018742798.1	1115363	1116693	-	--	--	--	--	--	--	--
XLOC_022642	NW_018744041.1	44414	44757	.	--	--	--	--	--	--	--
XLOC_002736	NW_018742381.1	1657179	1658891	.	K03549 KUP system potassium uptake protein | (RefSeq) putative potassium transporter 12 (A)	uncharacterized protein LOC110687178 [Chenopodium quinoa]	RecName: Full=Retrovirus-related Pol polyprotein from transposon RE2; AltName: Full=Retro element 2 {ECO:0000303|PubMed:10689195}; Short=AtRE2 {ECO:0000303|PubMed:10689195}; Includes: RecName: Full=Protease RE2; EC=3.4.23.-; Includes: RecName: Full=Reverse transcriptase RE2; EC=2.7.7.49; Includes: RecName: Full=Endonuclease RE2;	SubName: Full=Integrase {ECO:0000313|EMBL:ABM55238.1};	FOG: Transposon-encoded proteins with TYA, reverse transcriptase, integrase domains in various combinations	GO:0006310,DNA recombination; GO:0004519,endonuclease activity; GO:0015074,DNA integration; GO:0004190,aspartic-type endopeptidase activity; GO:0003676,nucleic acid binding; GO:0003964,RNA-directed DNA polymerase activity; GO:0046872,metal ion binding	--
XLOC_013835	NW_018743218.1	175430	175639	.	--	--	--	--	--	--	--
XLOC_027235	NW_018744502.1	1627538	1630594	-	K03264 translation initiation factor 6 | (RefSeq) eukaryotic translation initiation factor 6-2-like (A)	eukaryotic translation initiation factor 6-2-like [Hevea brasiliensis]	RecName: Full=Eukaryotic translation initiation factor 6-2 {ECO:0000255|HAMAP-Rule:MF_03132}; Short=AteIF-6;2;	SubName: Full=Translation initiation factor IF6 {ECO:0000313|EMBL:KVD98113.1}; Flags: Fragment;	Translation initiation factor 6 (eIF-6)	GO:0000460,maturation of 5.8S rRNA; GO:0005730,nucleolus; GO:0005634,nucleus; GO:0005829,cytosol; GO:0030687,preribosome, large subunit precursor; GO:0000054,ribosomal subunit export from nucleus; GO:0042256,mature ribosome assembly; GO:1902626,assembly of large subunit precursor of preribosome; GO:0009793,embryo development ending in seed dormancy; GO:0000470,maturation of LSU-rRNA; GO:0043023,r…	--
XLOC_025673	NW_018744298.1	737348	737743	.	--	--	--	--	--	--	--
XLOC_023025	NW_018744069.1	1716900	1717839	+	--	--	--	--	--	--	--
XLOC_024909	NW_018744239.1	5590198	5592306	+	K19984 exocyst complex component 5 | (RefSeq) uncharacterized protein LOC113272286 (A)	zinc finger BED domain-containing protein RICESLEEPER 2-like [Chenopodium quinoa]	RecName: Full=Zinc finger BED domain-containing protein RICESLEEPER 2; AltName: Full=Transposase-like protein RICESLEEPER 2;	SubName: Full=Uncharacterized protein {ECO:0000313|EMBL:EMJ14584.1};	Tam3-transposase (Ac family)	GO:0003700,DNA-binding transcription factor activity; GO:0005634,nucleus; GO:0009791,post-embryonic development; GO:0006357,regulation of transcription by RNA polymerase II; GO:0000977,RNA polymerase II regulatory region sequence-specific DNA binding; GO:0046983,protein dimerization activity; GO:0046872,metal ion binding; GO:0006351,transcription, DNA-templated	--
XLOC_002237	NW_018742329.1	4031061	4032783	+	--	uncharacterized protein LOC110781620 [Spinacia oleracea]	--	SubName: Full=Uncharacterized protein {ECO:0000313|EMBL:KMS95990.1};	--	GO:0016021,integral component of membrane	--
XLOC_029725	NW_018744676.1	245826	248309	-	--	uncharacterized protein LOC110790072 [Spinacia oleracea]	--	SubName: Full=Uncharacterized protein {ECO:0000313|EMBL:KNA08564.1};	--	--	--
XLOC_018555	NW_018743691.1	524776	527180	.	--	uncharacterized protein LOC110739341 [Chenopodium quinoa]	--	--	--	--	--
XLOC_008558	NW_018742817.1	3655770	3656354	.	K06173 tRNA pseudouridine38-40 synthase [EC:5.4.99.12] | (RefSeq) putative tRNA pseudouridine synthase (A)	--	--	--	--	--	--
XLOC_028027	NW_018744582.1	2726134	2727866	-	--	PREDICTED: wound-induced protein 1-like, partial [Nicotiana attenuata]	RecName: Full=Senescence associated gene 20 {ECO:0000303|PubMed:10444084}; AltName: Full=Protein WOUND-INDUCED 12 {ECO:0000303|PubMed:12857840}; Short=AtWI-12 {ECO:0000303|PubMed:12857840};	SubName: Full=Uncharacterized protein {ECO:0000313|EMBL:EEF41527.1};	--	GO:0010150,leaf senescence; GO:0007568,aging; GO:0009620,response to fungus; GO:0009624,response to nematode; GO:0010193,response to ozone; GO:0002238,response to molecule of fungal origin	Wound-induced protein WI12
XLOC_002164	NW_018742309.1	6320004	6321953	-	--	--	--	--	--	--	--
XLOC_003721	NW_018742418.1	370050	370575	.	--	--	--	--	--	--	--
XLOC_026201	NW_018744347.1	23442	23904	.	K02982 small subunit ribosomal protein S3 | (RefSeq) rps3, CDC77_pgp024; ribosomal protein S3 (A)	hypothetical protein BVRB_8g182860 [Beta vulgaris subsp. vulgaris]	RecName: Full=30S ribosomal protein S3, chloroplastic;	RecName: Full=30S ribosomal protein S3, chloroplastic {ECO:0000256|HAMAP-Rule:MF_01309};	--	GO:0003735,structural constituent of ribosome; GO:0009507,chloroplast; GO:0015935,small ribosomal subunit; GO:0006412,translation; GO:0019843,rRNA binding	--
XLOC_035534	NW_018745281.1	2685745	2685970	.	--	--	--	--	--	--	--
XLOC_013262	NW_018743204.1	2026904	2028426	+	--	LIM and calponin homology domains-containing protein 1-like [Chenopodium quinoa]	--	--	--	--	Fanconi anaemia protein FancD2 nuclease
XLOC_003590	NW_018742418.1	5521238	5522475	-	--	uncharacterized protein LOC110690552 [Chenopodium quinoa]	--	SubName: Full=Uncharacterized protein {ECO:0000313|EMBL:KNA13168.1};	--	--	--
XLOC_016799	NW_018743510.1	146777	147342	.	--	--	--	--	--	--	--
XLOC_028172	NW_018744593.1	4416795	4420001	+	K13217 pre-mRNA-processing factor 39 | (RefSeq) uncharacterized protein LOC114183870 isoform X1 (A)	Putative gag-pol polyprotein, identical [Solanum demissum]	RecName: Full=Retrovirus-related Pol polyprotein from transposon RE1; AltName: Full=Retro element 1 {ECO:0000303|PubMed:10689195}; Short=AtRE1 {ECO:0000303|PubMed:10689195}; Includes: RecName: Full=Protease RE1; EC=3.4.23.-; Includes: RecName: Full=Reverse transcriptase RE1; EC=2.7.7.49; Includes: RecName: Full=Endonuclease RE1;	SubName: Full=Putative gag-pol polyprotein, identical {ECO:0000313|EMBL:AAT38758.1};	FOG: Transposon-encoded proteins with TYA, reverse transcriptase, integrase domains in various combinations	GO:0006310,DNA recombination; GO:0004519,endonuclease activity; GO:0015074,DNA integration; GO:0004190,aspartic-type endopeptidase activity; GO:0003676,nucleic acid binding; GO:0003964,RNA-directed DNA polymerase activity; GO:0046872,metal ion binding	Reverse transcriptase (RNA-dependent DNA polymerase)
XLOC_016296	NW_018743397.1	75511	76367	-	--	hypothetical protein SOVF_006450 [Spinacia oleracea]	--	SubName: Full=Uncharacterized protein {ECO:0000313|EMBL:KNA25480.1};	--	--	--
XLOC_023331	NW_018744080.1	1080401	1082020	.	K01188 beta-glucosidase [EC:3.2.1.21] | (RefSeq) beta-glucosidase 12-like (A)	polygalacturonase inhibitor 1-like [Chenopodium quinoa]	RecName: Full=Polygalacturonase inhibitor; AltName: Full=Polygalacturonase-inhibiting protein; Short=PGIG; Flags: Precursor;	SubName: Full=Polygalacturonase inhibitor {ECO:0000313|EMBL:KEH22129.1};	--	GO:0048046,apoplast; GO:0005618,cell wall	--
XLOC_002769	NW_018742385.1	686087	688326	-	--	--	--	--	--	--	--
XLOC_031080	NW_018744855.1	45626	46156	.	--	--	--	--	--	--	--
XLOC_018379	NW_018743669.1	21702	22286	.	--	--	--	--	--	--	--
XLOC_021710	NW_018743946.1	3227032	3227509	.	--	BI1-like protein [Chenopodium quinoa]	RecName: Full=Protein LIFEGUARD 4 {ECO:0000303|PubMed:23888068}; Short=AtLFG4 {ECO:0000303|PubMed:23888068};	SubName: Full=Uncharacterized protein {ECO:0000313|EMBL:KNA05528.1};	N-methyl-D-aspartate receptor glutamate-binding subunit	GO:0016021,integral component of membrane	--
XLOC_038342	NW_018745569.1	1201155	1204418	-	K17604 zinc finger SWIM domain-containing protein 3 | (RefSeq) protein FAR1-RELATED SEQUENCE 5-like (A)	PKS-NRPS hybrid synthetase CHGG_01239-like [Chenopodium quinoa]	RecName: Full=Protein FAR1-RELATED SEQUENCE 5;	SubName: Full=Uncharacterized protein {ECO:0000313|EMBL:OMO51093.1};	--	GO:0006355,regulation of transcription, DNA-templated; GO:0005634,nucleus; GO:0008270,zinc ion binding	--
XLOC_012173	NW_018743144.1	2029547	2030918	.	--	--	--	--	--	--	--
XLOC_032388	NW_018744988.1	2728779	2729000	.	--	--	--	--	--	--	--
XLOC_007536	NW_018742741.1	27847	28881	.	--	hypothetical protein BVRB_8g186340 [Beta vulgaris subsp. vulgaris]	--	SubName: Full=Uncharacterized protein {ECO:0000313|EMBL:KMT04033.1};	--	GO:0016021,integral component of membrane	--
XLOC_033892	NW_018745030.1	629283	634944	+	--	uncharacterized protein LOC110700235 [Chenopodium quinoa]	--	--	--	--	--
XLOC_029379	NW_018744633.1	6972996	6974118	.	--	hypothetical protein SOVF_134570 [Spinacia oleracea]	--	SubName: Full=Uncharacterized protein {ECO:0000313|EMBL:KNA11518.1};	--	--	--
XLOC_024351	NW_018744143.1	1101101	1101950	.	--	PREDICTED: uncharacterized protein LOC104907243 [Beta vulgaris subsp. vulgaris]	--	SubName: Full=Uncharacterized protein {ECO:0000313|EMBL:KMS98369.1};	--	--	Wound-induced protein
XLOC_034426	NW_018745105.1	2729992	2731743	-	--	hypothetical protein BVRB_8g187570 [Beta vulgaris subsp. vulgaris]	--	SubName: Full=Uncharacterized protein {ECO:0000313|EMBL:KNA15234.1};	--	--	--
XLOC_032638	NW_018744991.1	2499497	2499935	.	--	--	--	--	--	--	--
XLOC_016662	NW_018743503.1	1280407	1280779	.	--	--	--	--	--	--	--
XLOC_004531	NW_018742484.1	1864778	1866345	+	--	uncharacterized protein LOC110726521 isoform X1 [Chenopodium quinoa]	--	SubName: Full=Uncharacterized protein {ECO:0000313|EMBL:KNA23435.1};	Ubiquitin carboxyl-terminal hydrolase	GO:0016579,protein deubiquitination; GO:0036459,thiol-dependent ubiquitinyl hydrolase activity; GO:0003676,nucleic acid binding	--
XLOC_027168	NW_018744502.1	1929983	1931688	+	--	putative disease resistance protein RGA3 [Chenopodium quinoa]	--	--	--	--	--
XLOC_023334	NW_018744080.1	1129901	1130477	.	--	--	--	--	--	--	--
XLOC_010458	NW_018742974.1	2795143	2796298	-	K02730 20S proteasome subunit alpha 1 [EC:3.4.25.1] | (RefSeq) proteasome subunit alpha type-6 (A)	PREDICTED: proteasome subunit alpha type-6 isoform X1 [Oryza sativa Japonica Group]	RecName: Full=Proteasome subunit alpha type-6-A; EC=3.4.25.1; AltName: Full=20S proteasome subunit alpha A-1; AltName: Full=Proteasome component 1; AltName: Full=Proteasome subunit alpha type-1;	RecName: Full=Proteasome subunit alpha type {ECO:0000256|RuleBase:RU000551}; EC=3.4.25.1 {ECO:0000256|RuleBase:RU000551};	20S proteasome, regulatory subunit alpha type PSMA6/SCL1	GO:0019773,proteasome core complex, alpha-subunit complex; GO:0005829,cytosol; GO:0004298,threonine-type endopeptidase activity; GO:0006511,ubiquitin-dependent protein catabolic process; GO:0010043,response to zinc ion; GO:0000502,proteasome complex; GO:0005774,vacuolar membrane; GO:0005634,nucleus	--
XLOC_009215	NW_018742899.1	2478993	2479353	.	--	--	--	--	--	--	--
XLOC_021143	NW_018743920.1	2153191	2155758	-	K15255 ATP-dependent DNA helicase PIF1 [EC:3.6.4.12] | (RefSeq) ATP-dependent DNA helicase PIF1-like (A)	ATP-dependent DNA helicase PIF1-like [Spinacia oleracea]	--	RecName: Full=ATP-dependent DNA helicase {ECO:0000256|RuleBase:RU363044}; EC=3.6.4.12 {ECO:0000256|RuleBase:RU363044};	DNA helicase PIF1/RRM3	GO:0003678,DNA helicase activity; GO:0006310,DNA recombination; GO:0000723,telomere maintenance; GO:0005524,ATP binding; GO:0006281,DNA repair	--
XLOC_025386	NW_018744284.1	722402	722720	.	--	--	--	--	--	--	--
XLOC_022499	NW_018744041.1	287285	288183	+	--	trypsin inhibitor 1B-like [Chenopodium quinoa]	RecName: Full=Trypsin inhibitor 1B; AltName: Full=ETIB;	SubName: Full=Uncharacterized protein {ECO:0000313|EMBL:KNA14861.1};	--	GO:0004867,serine-type endopeptidase inhibitor activity	--
XLOC_036379	NW_018745410.1	1883804	1887799	+	K18873 pathogen-induced protein kinase | (RefSeq) serine/threonine-protein kinase CDL1-like (A)	hypothetical protein SOVF_176210 [Spinacia oleracea]	RecName: Full=Probable serine/threonine-protein kinase PBL5 {ECO:0000305}; EC=2.7.11.1 {ECO:0000305}; AltName: Full=PBS1-like protein 5 {ECO:0000303|PubMed:20413097}; AltName: Full=Serine/threonine-protein kinase RLCKVII {ECO:0000305};	SubName: Full=Uncharacterized protein {ECO:0000313|EMBL:KNA06970.1};	Serine/threonine protein kinase	GO:0006952,defense response; GO:0006468,protein phosphorylation; GO:0004675,transmembrane receptor protein serine/threonine kinase activity; GO:0007166,cell surface receptor signaling pathway; GO:0005886,plasma membrane; GO:0005524,ATP binding	--
XLOC_003057	NW_018742393.1	2275133	2275801	.	K14400 pre-mRNA cleavage complex 2 protein Pcf11 | (RefSeq) LOW QUALITY PROTEIN: uncharacterized protein LOC111982967 (A)	serine/threonine-protein phosphatase 7 long form homolog [Chenopodium quinoa]	RecName: Full=Serine/threonine-protein phosphatase 7 long form homolog; EC=3.1.3.16; AltName: Full=Protein MAIN-LIKE 3 {ECO:0000303|PubMed:24635680};	SubName: Full=Uncharacterized protein {ECO:0000313|EMBL:ESQ30762.1};	--	GO:0005634,nucleus; GO:0046872,metal ion binding; GO:0004721,phosphoprotein phosphatase activity	Plant mobile domain
XLOC_025918	NW_018744304.1	3944744	3945829	.	--	--	--	--	--	--	--
XLOC_022497	NW_018744041.1	276177	277704	+	--	ankyrin repeat-containing protein At5g02620-like [Chenopodium quinoa]	RecName: Full=Ankyrin repeat-containing protein At5g02620;	SubName: Full=Uncharacterized protein {ECO:0000313|EMBL:KNA18726.1};	FOG: Ankyrin repeat	GO:0016021,integral component of membrane; GO:0005783,endoplasmic reticulum; GO:0005886,plasma membrane	--
XLOC_003724	NW_018742418.1	1158026	1158768	.	--	--	--	--	--	--	--
XLOC_012169	NW_018743144.1	1012824	1013614	.	--	--	--	--	--	--	--
XLOC_002317	NW_018742329.1	4876970	4878508	-	K00799 glutathione S-transferase [EC:2.5.1.18] | (RefSeq) uncharacterized protein LOC110786294 (A)	PREDICTED: uncharacterized protein LOC104890171 [Beta vulgaris subsp. vulgaris]	--	SubName: Full=Uncharacterized protein {ECO:0000313|EMBL:CCA66036.1};	--	GO:0003676,nucleic acid binding	--
XLOC_004858	NW_018742484.1	2597012	2602064	.	K20178 vacuolar protein sorting-associated protein 8 | (RefSeq) uncharacterized LOC107864957 (A)	uncharacterized protein LOC110689441 [Chenopodium quinoa]	RecName: Full=Putative ribonuclease H protein At1g65750; EC=3.1.26.4;	SubName: Full=Uncharacterized protein {ECO:0000313|EMBL:CCA65981.1};	FOG: Reverse transcriptase	GO:0046872,metal ion binding; GO:0004523,RNA-DNA hybrid ribonuclease activity; GO:0003676,nucleic acid binding	--
XLOC_011245	NW_018743033.1	458949	459657	.	--	--	--	--	--	--	--
XLOC_003059	NW_018742393.1	2302448	2303073	.	--	hypothetical protein BVRB_2g027680 [Beta vulgaris subsp. vulgaris]	--	SubName: Full=Uncharacterized protein {ECO:0000313|EMBL:OAY60476.1};	--	GO:0016021,integral component of membrane	--
XLOC_016626	NW_018743503.1	2308538	2310000	+	--	uncharacterized protein LOC110705311 [Chenopodium quinoa]	--	SubName: Full=Uncharacterized protein {ECO:0000313|EMBL:KNA06815.1};	--	--	--
XLOC_011705	NW_018743066.1	1694221	1694816	-	--	hypothetical protein BVRB_8g186080 [Beta vulgaris subsp. vulgaris]	--	--	--	--	--
XLOC_009875	NW_018742914.1	5367472	5369304	.	--	--	--	--	--	--	--
XLOC_009024	NW_018742881.1	344962	346074	.	--	uncharacterized protein LOC110722338 [Chenopodium quinoa]	--	--	--	--	--
XLOC_007495	NW_018742738.1	555587	556230	.	--	--	--	--	--	--	--
XLOC_004163	NW_018742461.1	3803137	3809481	+	--	uncharacterized protein LOC110716485 [Chenopodium quinoa]	--	SubName: Full=Uncharacterized protein {ECO:0000313|EMBL:KNA10440.1};	--	--	--
XLOC_014443	NW_018743287.1	1806	16135	+	--	putative uncharacterized protein art2 [Quercus suber]	--	SubName: Full=Uncharacterized protein {ECO:0000313|EnsemblPlants:GLYMA13G11980.1};	--	--	--
XLOC_002773	NW_018742385.1	112023	112246	.	--	uncharacterized protein LOC110702992 [Chenopodium quinoa]	--	SubName: Full=Uncharacterized protein {ECO:0000313|EMBL:CCA66036.1};	--	GO:0003676,nucleic acid binding	--
XLOC_001368	NW_018742214.1	27289	27965	.	--	--	--	--	--	--	--
XLOC_000222	NW_018742204.1	17891357	17930880	+	--	hypothetical protein SOVF_204540 [Spinacia oleracea]	RecName: Full=Antimicrobial peptide 2; Short=AMP2; Contains: RecName: Full=Antimicrobial peptide 1; Short=AMP1; Flags: Precursor;	SubName: Full=Uncharacterized protein {ECO:0000313|EMBL:KNA03932.1};	--	GO:0050832,defense response to fungus; GO:0031640,killing of cells of other organism; GO:0008061,chitin binding; GO:0042742,defense response to bacterium	Domain of unknown function (DUF5109)
XLOC_032947	NW_018745000.1	4201967	4202630	.	--	cysteine proteinase inhibitor 1-like [Chenopodium quinoa]	--	--	--	--	--
XLOC_015321	NW_018743292.1	6563922	6564341	.	K01881 prolyl-tRNA synthetase [EC:6.1.1.15] | (RefSeq) proline--tRNA ligase, cytoplasmic-like (A)	uncharacterized protein LOC110712507 [Chenopodium quinoa]	--	SubName: Full=Uncharacterized protein {ECO:0000313|EMBL:KNA13963.1}; Flags: Fragment;	FOG: Transposon-encoded proteins with TYA, reverse transcriptase, integrase domains in various combinations	--	Retrotransposon gag protein
XLOC_036586	NW_018745413.1	1550432	1550964	.	--	--	--	--	--	--	--
XLOC_020353	NW_018743905.1	271538	271753	.	--	--	--	--	--	--	--
XLOC_000767	NW_018742204.1	10168203	10168797	.	K02704 photosystem II CP47 chlorophyll apoprotein | (RefSeq) psbB, CDC77_pgp037; PsbB (A)	photosystem II CP47 chlorophyll apoprotein, partial (chloroplast) [Ruptiliocarpon caracolito]	RecName: Full=Photosystem II CP47 reaction center protein {ECO:0000255|HAMAP-Rule:MF_01495}; AltName: Full=PSII 47 kDa protein {ECO:0000255|HAMAP-Rule:MF_01495}; AltName: Full=Protein CP-47 {ECO:0000255|HAMAP-Rule:MF_01495};	SubName: Full=Photosystem II CP47 chlorophyll apoprotein {ECO:0000313|EMBL:ABV65630.1}; Flags: Fragment;	--	GO:0009535,chloroplast thylakoid membrane; GO:0016168,chlorophyll binding; GO:0009523,photosystem II; GO:0016021,integral component of membrane; GO:0018298,protein-chromophore linkage; GO:0045156,electron transporter, transferring electrons within the cyclic electron transport pathway of photosynthesis activity; GO:0009772,photosynthetic electron transport in photosystem II	Photosystem II protein
XLOC_004398	NW_018742461.1	332867	333268	.	--	--	--	--	--	--	--
XLOC_009465	NW_018742907.1	250879	251387	.	--	--	--	--	--	--	--
XLOC_034329	NW_018745080.1	94854	95926	.	--	--	--	--	--	--	--
XLOC_000769	NW_018742204.1	10642974	10643613	.	--	--	--	--	--	--	--
XLOC_023003	NW_018744066.1	2968221	2969247	.	--	hypothetical protein SOVF_080840 [Spinacia oleracea]	--	SubName: Full=Uncharacterized protein {ECO:0000313|EMBL:KNA17336.1};	--	--	--
XLOC_030454	NW_018744722.1	238155	240132	-	--	ankyrin repeat-containing protein At5g02620-like [Chenopodium quinoa]	--	SubName: Full=Uncharacterized protein {ECO:0000313|EMBL:KNA25860.1};	--	GO:0016021,integral component of membrane	--
XLOC_032949	NW_018745000.1	4874873	4875881	.	--	hypothetical protein BVRB_3g056140 [Beta vulgaris subsp. vulgaris]	--	SubName: Full=Uncharacterized protein {ECO:0000313|EMBL:KNA16530.1};	--	--	--
XLOC_009615	NW_018742914.1	7561547	7562471	+	K01768 adenylate cyclase [EC:4.6.1.1] | (RefSeq) LOW QUALITY PROTEIN: uncharacterized protein LOC107911085 (A)	PREDICTED: uncharacterized protein LOC104888623 [Beta vulgaris subsp. vulgaris]	RecName: Full=Retrovirus-related Pol polyprotein from transposon TNT 1-94; Includes: RecName: Full=Protease; EC=3.4.23.-; Includes: RecName: Full=Reverse transcriptase; EC=2.7.7.49; Includes: RecName: Full=Endonuclease;	SubName: Full=uncharacterized protein LOC107830311 {ECO:0000313|RefSeq:XP_016513327.1};	FOG: Transposon-encoded proteins with TYA, reverse transcriptase, integrase domains in various combinations	GO:0004519,endonuclease activity; GO:0015074,DNA integration; GO:0004190,aspartic-type endopeptidase activity; GO:0008270,zinc ion binding; GO:0003676,nucleic acid binding; GO:0003964,RNA-directed DNA polymerase activity	--
XLOC_003750	NW_018742418.1	4537997	4539049	.	K01768 adenylate cyclase [EC:4.6.1.1] | (RefSeq) LOW QUALITY PROTEIN: uncharacterized protein LOC107911085 (A)	uncharacterized protein LOC110721111 [Chenopodium quinoa]	--	SubName: Full=Uncharacterized protein {ECO:0000313|EMBL:BAT84665.1};	FOG: Transposon-encoded proteins with TYA, reverse transcriptase, integrase domains in various combinations	GO:0008270,zinc ion binding; GO:0003676,nucleic acid binding	--
XLOC_033352	NW_018745014.1	31882	32333	.	--	--	--	--	--	--	--
XLOC_005038	NW_018742523.1	4445223	4446046	.	--	uncharacterized protein LOC110730268 isoform X1 [Chenopodium quinoa]	--	--	--	--	--
XLOC_020068	NW_018743858.1	3074223	3078998	-	K19984 exocyst complex component 5 | (RefSeq) uncharacterized protein LOC113272286 (A)	zinc finger BED domain-containing protein RICESLEEPER 2-like [Chenopodium quinoa]	RecName: Full=Putative AC transposase; AltName: Full=ORFA;	SubName: Full=Transposase {ECO:0000313|EMBL:AGH20188.1};	Tam3-transposase (Ac family)	GO:0006310,DNA recombination; GO:0046983,protein dimerization activity; GO:0032196,transposition; GO:0003677,DNA binding	hAT family C-terminal dimerisation region
XLOC_036243	NW_018745395.1	1038874	1043481	+	--	uncharacterized protein LOC110709723 [Chenopodium quinoa]	--	SubName: Full=Uncharacterized protein {ECO:0000313|EMBL:KNA03556.1}; Flags: Fragment;	--	--	--
XLOC_006127	NW_018742630.1	3403391	3408791	-	--	uncharacterized protein LOC110692268 [Chenopodium quinoa]	--	SubName: Full=Uncharacterized protein {ECO:0000313|EMBL:PIA42252.1};	--	--	Agglutinin domain
XLOC_036476	NW_018745410.1	8178595	8178994	.	--	protein FAR1-RELATED SEQUENCE 6-like [Chenopodium quinoa]	--	--	--	--	--
XLOC_000773	NW_018742204.1	11753729	11754373	.	--	--	--	--	--	--	--
XLOC_038729	NW_018745650.1	2777147	2777751	.	K21760 bifunctional lysine-specific demethylase and histidyl-hydroxylase MINA [EC:1.14.11.-] | (RefSeq) uncharacterized protein LOC110799957 isoform X1 (A)	uncharacterized protein LOC110716587 [Chenopodium quinoa]	--	SubName: Full=Uncharacterized protein {ECO:0000313|EMBL:KNA20130.1};	--	--	--
XLOC_012634	NW_018743175.1	3885587	3886705	.	--	uncharacterized protein LOC110730023 [Chenopodium quinoa]	--	SubName: Full=Uncharacterized protein {ECO:0000313|EMBL:KMS97580.1};	--	--	--
XLOC_004962	NW_018742517.1	8077	10332	-	--	TITAN-like protein, partial [Chenopodium quinoa]	RecName: Full=TITAN-like protein;	SubName: Full=Uncharacterized protein {ECO:0000313|EMBL:KNA11566.1};	--	GO:0009793,embryo development ending in seed dormancy; GO:0046872,metal ion binding; GO:0005634,nucleus; GO:0009960,endosperm development	--
XLOC_003199	NW_018742410.1	1291583	1291882	.	--	hypothetical protein SOVF_027150, partial [Spinacia oleracea]	--	SubName: Full=Uncharacterized protein {ECO:0000313|EMBL:KNA23189.1}; Flags: Fragment;	--	GO:0046983,protein dimerization activity	--
XLOC_035841	NW_018745311.1	679859	690832	-	K19984 exocyst complex component 5 | (RefSeq) uncharacterized protein LOC113272286 (A)	zinc finger BED domain-containing protein RICESLEEPER 2-like [Chenopodium quinoa]	RecName: Full=Putative AC transposase; AltName: Full=ORFA;	SubName: Full=Transposase {ECO:0000313|EMBL:AGH20188.1};	Tam3-transposase (Ac family)	GO:0006310,DNA recombination; GO:0046983,protein dimerization activity; GO:0032196,transposition; GO:0003677,DNA binding	hAT family C-terminal dimerisation region
XLOC_025131	NW_018744239.1	2548621	2549027	.	K03136 transcription initiation factor TFIIE subunit alpha | (RefSeq) transcription initiation factor IIE subunit alpha-like (A)	uncharacterized protein LOC110722495 [Chenopodium quinoa]	RecName: Full=Retrovirus-related Pol polyprotein from transposon RE1; AltName: Full=Retro element 1 {ECO:0000303|PubMed:10689195}; Short=AtRE1 {ECO:0000303|PubMed:10689195}; Includes: RecName: Full=Protease RE1; EC=3.4.23.-; Includes: RecName: Full=Reverse transcriptase RE1; EC=2.7.7.49; Includes: RecName: Full=Endonuclease RE1;	SubName: Full=Putative ovule protein {ECO:0000313|EMBL:JAP22011.1};	FOG: Transposon-encoded proteins with TYA, reverse transcriptase, integrase domains in various combinations	GO:0006310,DNA recombination; GO:0004519,endonuclease activity; GO:0015074,DNA integration; GO:0004190,aspartic-type endopeptidase activity; GO:0003676,nucleic acid binding; GO:0003964,RNA-directed DNA polymerase activity; GO:0046872,metal ion binding	--
XLOC_038727	NW_018745650.1	1998978	1999308	.	--	--	--	--	--	--	--
XLOC_003045	NW_018742393.1	2487643	2488670	-	--	--	--	--	--	--	--
XLOC_033839	NW_018745024.1	8671967	8672324	.	--	--	--	--	--	--	--
XLOC_004400	NW_018742461.1	459906	460230	.	--	--	--	--	--	--	--
XLOC_000319	NW_018742204.1	21613868	21616195	+	--	uncharacterized protein LOC110692716 [Chenopodium quinoa]	--	SubName: Full=Uncharacterized protein {ECO:0000313|EMBL:KNA23962.1};	--	--	--
XLOC_030002	NW_018744693.1	7279808	7280023	.	--	uncharacterized protein LOC110704848 [Chenopodium quinoa]	--	SubName: Full=Uncharacterized protein {ECO:0000313|EMBL:OMP01552.1};	--	GO:0004523,RNA-DNA hybrid ribonuclease activity; GO:0003676,nucleic acid binding	--
XLOC_016557	NW_018743448.1	2750406	2750685	.	K11498 centromeric protein E | (RefSeq) kinesin-like protein KIN-7F (A)	PREDICTED: kinesin-like protein KIN-7F [Beta vulgaris subsp. vulgaris]	RecName: Full=Kinesin-like protein KIN-7F {ECO:0000305};	RecName: Full=Kinesin-like protein {ECO:0000256|RuleBase:RU000394};	Kinesin-like protein	GO:0008017,microtubule binding; GO:0007018,microtubule-based movement; GO:0003777,microtubule motor activity; GO:0016887,ATPase activity; GO:0009506,plasmodesma; GO:0005871,kinesin complex; GO:0005874,microtubule; GO:0005524,ATP binding	7 transmembrane sweet-taste receptor of 3 GCPR
XLOC_038262	NW_018745557.1	10445	50311	-	--	--	--	--	--	--	Protein of unknown function (DUF3631)
XLOC_024919	NW_018744239.1	6630073	6644208	+	--	--	--	--	--	--	--
XLOC_007889	NW_018742770.1	2707502	2708451	.	--	zinc finger MYM-type protein 1-like [Chenopodium quinoa]	--	--	--	--	--
XLOC_020326	NW_018743894.1	3015745	3017317	-	--	--	--	--	--	--	--
XLOC_015324	NW_018743292.1	7636202	7636613	.	--	--	--	--	--	--	--
XLOC_011272	NW_018743047.1	2140928	2142214	+	--	uncharacterized protein LOC110731637 [Chenopodium quinoa]	--	SubName: Full=Putative S-adenosyl-L-methionine-dependent methyltransferases superfamily protein {ECO:0000313|EMBL:OTF87552.1};	--	GO:0008168,methyltransferase activity; GO:0016021,integral component of membrane	--
XLOC_022885	NW_018744066.1	2958554	2960602	+	--	hypothetical protein BVRB_8g196160 [Beta vulgaris subsp. vulgaris]	--	SubName: Full=Uncharacterized protein {ECO:0000313|EMBL:CDP03345.1};	--	GO:0016021,integral component of membrane	Arabinogalactan peptide
XLOC_016732	NW_018743510.1	4848602	4852732	+	--	7-deoxyloganetic acid glucosyltransferase-like [Chenopodium quinoa]	RecName: Full=7-deoxyloganetic acid glucosyltransferase; EC=2.4.1.323; AltName: Full=UDP-glucose glucosyltransferase 8; Short=CrUGT8; AltName: Full=UDP-glycosyltransferase 709C2;	RecName: Full=Glycosyltransferase {ECO:0000256|RuleBase:RU362057}; EC=2.4.1.- {ECO:0000256|RuleBase:RU362057};	--	GO:0035251,UDP-glucosyltransferase activity; GO:0102970,7-deoxyloganetic acid glucosyltransferase activity; GO:1900994,(-)-secologanin biosynthetic process	--
XLOC_025766	NW_018744301.1	557049	559609	.	K09571 FK506-binding protein 4/5 [EC:5.2.1.8] | (RefSeq) peptidyl-prolyl cis-trans isomerase FKBP62-like (A)	70 kDa peptidyl-prolyl isomerase-like [Chenopodium quinoa]	RecName: Full=70 kDa peptidyl-prolyl isomerase; EC=5.2.1.8; AltName: Full=Peptidyl-prolyl cis-trans isomerase; Short=PPIase; AltName: Full=Rotamase;	SubName: Full=Uncharacterized protein {ECO:0000313|EMBL:KNA12343.1};	FKBP-type peptidyl-prolyl cis-trans isomerase	GO:0005516,calmodulin binding; GO:0003755,peptidyl-prolyl cis-trans isomerase activity	--
XLOC_026155	NW_018744311.1	1983736	1985079	.	--	--	--	--	--	--	--
XLOC_019967	NW_018743850.1	2887191	2887463	.	K02111 F-type H+/Na+-transporting ATPase subunit alpha [EC:7.1.2.2 7.2.2.1] | (RefSeq) atpA, CDC77_pgp079; AtpA (A)	ATP synthase alpha subunit, partial (chloroplast) [Nicotiana tomentosiformis]	RecName: Full=ATP synthase subunit alpha, chloroplastic {ECO:0000255|HAMAP-Rule:MF_01346}; EC=3.6.3.14 {ECO:0000255|HAMAP-Rule:MF_01346}; AltName: Full=ATP synthase F1 sector subunit alpha {ECO:0000255|HAMAP-Rule:MF_01346}; AltName: Full=F-ATPase subunit alpha {ECO:0000255|HAMAP-Rule:MF_01346};	SubName: Full=ATP synthase alpha subunit {ECO:0000313|EMBL:BAC77591.1}; Flags: Fragment;	F0F1-type ATP synthase, alpha subunit	GO:0009535,chloroplast thylakoid membrane; GO:0045261,proton-transporting ATP synthase complex, catalytic core F(1); GO:0015986,ATP synthesis coupled proton transport; GO:0005524,ATP binding; GO:0046933,proton-transporting ATP synthase activity, rotational mechanism	--
XLOC_038572	NW_018745617.1	1011317	1012213	.	K02691 photosystem I subunit VII | (RefSeq) psaC, SobiCp074; photosystem I subunit VII (A)	photosystem I subunit VII (chloroplast) [Masdevallia picturata]	RecName: Full=Photosystem I iron-sulfur center {ECO:0000255|HAMAP-Rule:MF_01303}; EC=1.97.1.12 {ECO:0000255|HAMAP-Rule:MF_01303}; AltName: Full=9 kDa polypeptide {ECO:0000255|HAMAP-Rule:MF_01303}; AltName: Full=PSI-C {ECO:0000255|HAMAP-Rule:MF_01303}; AltName: Full=Photosystem I subunit VII {ECO:0000255|HAMAP-Rule:MF_01303}; AltName: Full=PsaC {ECO:0000255|HAMAP-Rule:MF_01303};	RecName: Full=Photosystem I iron-sulfur center {ECO:0000256|HAMAP-Rule:MF_01303}; EC=1.97.1.12 {ECO:0000256|HAMAP-Rule:MF_01303}; AltName: Full=9 kDa polypeptide {ECO:0000256|HAMAP-Rule:MF_01303}; AltName: Full=PSI-C {ECO:0000256|HAMAP-Rule:MF_01303}; AltName: Full=Photosystem I subunit VII {ECO:0000256|HAMAP-Rule:MF_01303}; AltName: Full=PsaC {ECO:0000256|HAMAP-Rule:MF_01303};	--	GO:0009535,chloroplast thylakoid membrane; GO:0009522,photosystem I; GO:0051539,4 iron, 4 sulfur cluster binding; GO:0046872,metal ion binding; GO:0009773,photosynthetic electron transport in photosystem I; GO:0009055,electron transfer activity	NADH-ubiquinone/plastoquinone oxidoreductase chain 4L
XLOC_033822	NW_018745024.1	5220761	5221384	.	--	--	--	--	--	--	--
XLOC_036783	NW_018745448.1	8844585	8846067	-	--	--	--	--	--	--	--
XLOC_026871	NW_018744460.1	3384675	3385793	.	K14400 pre-mRNA cleavage complex 2 protein Pcf11 | (RefSeq) LOW QUALITY PROTEIN: uncharacterized protein LOC111982967 (A)	uncharacterized protein LOC110697238 [Chenopodium quinoa]	RecName: Full=Serine/threonine-protein phosphatase 7 long form homolog; EC=3.1.3.16; AltName: Full=Protein MAIN-LIKE 3 {ECO:0000303|PubMed:24635680};	SubName: Full=Uncharacterized protein {ECO:0000313|EMBL:CAN81676.1};	--	GO:0005634,nucleus; GO:0046872,metal ion binding; GO:0004721,phosphoprotein phosphatase activity	Plant mobile domain
XLOC_028288	NW_018744593.1	4066984	4067652	.	--	--	--	--	--	--	--
XLOC_023614	NW_018744092.1	689634	690414	.	--	--	--	--	--	--	--
XLOC_018433	NW_018743691.1	1522900	1523245	+	--	--	--	--	--	--	--
XLOC_035844	NW_018745311.1	1313153	1313868	-	--	--	--	--	--	--	--
XLOC_031184	NW_018744858.1	2687937	2688180	.	--	--	--	--	--	--	--
XLOC_025134	NW_018744239.1	3841567	3842227	.	--	histone H3.v1-like [Chenopodium quinoa]	--	--	--	--	--
XLOC_039528	NW_018745684.1	7514387	7514827	.	--	--	--	--	--	--	--
XLOC_024894	NW_018744239.1	4388689	4390637	+	--	Retrovirus-related Pol polyprotein from transposon TNT 1-94 [Cajanus cajan]	--	SubName: Full=Retrovirus-related Pol polyprotein from transposon TNT 1-94 {ECO:0000313|EMBL:KYP66503.1};	--	GO:0015074,DNA integration; GO:0003676,nucleic acid binding	--
XLOC_019720	NW_018743850.1	6508696	6513386	+	K19984 exocyst complex component 5 | (RefSeq) uncharacterized protein LOC113272286 (A)	putative transposase [Dianthus caryophyllus]	RecName: Full=Zinc finger BED domain-containing protein RICESLEEPER 2; AltName: Full=Transposase-like protein RICESLEEPER 2;	SubName: Full=Putative transposase {ECO:0000313|EMBL:BAN05298.1};	Tam3-transposase (Ac family)	GO:0003700,DNA-binding transcription factor activity; GO:0005634,nucleus; GO:0009791,post-embryonic development; GO:0006357,regulation of transcription by RNA polymerase II; GO:0000977,RNA polymerase II regulatory region sequence-specific DNA binding; GO:0046983,protein dimerization activity; GO:0046872,metal ion binding; GO:0006351,transcription, DNA-templated	hAT family C-terminal dimerisation region
XLOC_038732	NW_018745650.1	2933992	2934219	.	K14807 ATP-dependent RNA helicase DDX51/DBP6 [EC:3.6.4.13] | (RefSeq) DEAD-box ATP-dependent RNA helicase 1-like (A)	DEAD-box ATP-dependent RNA helicase 1-like [Chenopodium quinoa]	RecName: Full=DEAD-box ATP-dependent RNA helicase 1; EC=3.6.4.13;	SubName: Full=Uncharacterized protein {ECO:0000313|EMBL:KNA08325.1};	DEAD-box ATP-dependent RNA helicase	GO:0005737,cytoplasm; GO:0005730,nucleolus; GO:0004004,ATP-dependent RNA helicase activity; GO:0003723,RNA binding; GO:0017151,DEAD/H-box RNA helicase binding; GO:0010501,RNA secondary structure unwinding; GO:0005524,ATP binding	--
XLOC_009105	NW_018742899.1	116453	118340	+	--	--	--	--	--	--	--
XLOC_021713	NW_018743946.1	3487278	3489487	.	K01728 pectate lyase [EC:4.2.2.2] | (RefSeq) pectate lyase 1-like (A)	uncharacterized protein LOC110722963 [Chenopodium quinoa]	--	SubName: Full=Uncharacterized protein {ECO:0000313|EMBL:KNA16327.1};	--	GO:0016021,integral component of membrane	Domain of unknown function (DUF4220)
XLOC_012170	NW_018743144.1	1408445	1408989	.	--	uncharacterized protein LOC110725985 [Chenopodium quinoa]	--	--	--	--	--
XLOC_023249	NW_018744080.1	968451	969747	-	--	--	--	--	--	--	--
XLOC_015326	NW_018743292.1	8139371	8139725	.	--	--	--	--	--	--	--
XLOC_023709	NW_018744093.1	1992321	1992988	.	--	--	--	--	--	--	--
XLOC_018007	NW_018743616.1	423352	427424	-	--	PREDICTED: uncharacterized protein LOC108211773 [Daucus carota subsp. sativus]	--	SubName: Full=Uncharacterized protein {ECO:0000313|EnsemblPlants:BRADI2G06320.1};	--	GO:0046983,protein dimerization activity	hAT family C-terminal dimerisation region
XLOC_008479	NW_018742815.1	4508071	4508290	.	--	uncharacterized protein LOC110738171 [Chenopodium quinoa]	RecName: Full=Putative ribonuclease H protein At1g65750; EC=3.1.26.4;	SubName: Full=Uncharacterized protein {ECO:0000313|EMBL:KNA04166.1};	FOG: Reverse transcriptase	GO:0046872,metal ion binding; GO:0004523,RNA-DNA hybrid ribonuclease activity; GO:0003676,nucleic acid binding	Reverse transcriptase-like
XLOC_013291	NW_018743204.1	54842	55665	-	--	--	--	--	--	--	--
XLOC_024502	NW_018744151.1	687981	688953	-	--	--	--	--	--	--	Skp1 family, dimerisation domain
XLOC_019657	NW_018743850.1	2888374	2889493	+	K02109 F-type H+-transporting ATPase subunit b | (RefSeq) atpF, CDC77_pgp078; AtpF (A)	AtpF (chloroplast) [Chenopodium quinoa]	RecName: Full=ATP synthase subunit b, chloroplastic {ECO:0000255|HAMAP-Rule:MF_01398}; AltName: Full=ATP synthase F(0) sector subunit b {ECO:0000255|HAMAP-Rule:MF_01398}; AltName: Full=ATPase subunit I {ECO:0000255|HAMAP-Rule:MF_01398};	RecName: Full=ATP synthase subunit b, chloroplastic {ECO:0000256|HAMAP-Rule:MF_01398}; AltName: Full=ATP synthase F(0) sector subunit b {ECO:0000256|HAMAP-Rule:MF_01398}; AltName: Full=ATPase subunit I {ECO:0000256|HAMAP-Rule:MF_01398};	--	GO:0009535,chloroplast thylakoid membrane; GO:0045263,proton-transporting ATP synthase complex, coupling factor F(o); GO:0015986,ATP synthesis coupled proton transport; GO:0016021,integral component of membrane; GO:0015078,proton transmembrane transporter activity; GO:0005524,ATP binding	--
XLOC_036504	NW_018745413.1	3023957	3026032	+	--	uncharacterized protein LOC110688556 [Chenopodium quinoa]	--	SubName: Full=Uncharacterized protein {ECO:0000313|EMBL:CCA66040.1};	FOG: Reverse transcriptase	GO:0003676,nucleic acid binding	--
XLOC_038518	NW_018745617.1	189938	191467	-	--	--	--	--	--	--	--
XLOC_015642	NW_018743331.1	4419932	4420208	-	--	uncharacterized protein LOC110706457, partial [Chenopodium quinoa]	--	--	--	--	--
XLOC_021140	NW_018743920.1	1984546	1985446	-	--	hypothetical protein SOVF_068610 [Spinacia oleracea]	--	SubName: Full=Uncharacterized protein {ECO:0000313|EMBL:KNA18672.1};	--	--	--
XLOC_036471	NW_018745410.1	6475333	6476560	.	--	--	--	--	--	--	--
XLOC_034995	NW_018745190.1	733470	734026	.	--	--	--	--	--	--	--
XLOC_004413	NW_018742461.1	3430016	3431389	.	--	uncharacterized protein LOC110708092 isoform X2 [Chenopodium quinoa]	--	--	--	--	--
XLOC_010552	NW_018742980.1	742948	743471	.	--	glutathione S-transferase T3-like [Chenopodium quinoa]	--	--	--	--	--
XLOC_000985	NW_018742205.1	6297077	6301193	+	K13217 pre-mRNA-processing factor 39 | (RefSeq) uncharacterized protein LOC114183870 isoform X1 (A)	PREDICTED: uncharacterized protein LOC109135510 [Beta vulgaris subsp. vulgaris]	RecName: Full=Retrovirus-related Pol polyprotein from transposon RE1; AltName: Full=Retro element 1 {ECO:0000303|PubMed:10689195}; Short=AtRE1 {ECO:0000303|PubMed:10689195}; Includes: RecName: Full=Protease RE1; EC=3.4.23.-; Includes: RecName: Full=Reverse transcriptase RE1; EC=2.7.7.49; Includes: RecName: Full=Endonuclease RE1;	SubName: Full=Reverse transcriptase, RNA-dependent DNA polymerase {ECO:0000313|EMBL:OMP02866.1};	FOG: Transposon-encoded proteins with TYA, reverse transcriptase, integrase domains in various combinations	GO:0006310,DNA recombination; GO:0004519,endonuclease activity; GO:0015074,DNA integration; GO:0004190,aspartic-type endopeptidase activity; GO:0003676,nucleic acid binding; GO:0003964,RNA-directed DNA polymerase activity; GO:0046872,metal ion binding	Reverse transcriptase (RNA-dependent DNA polymerase)
XLOC_028245	NW_018744593.1	3973641	3977259	-	K13420 LRR receptor-like serine/threonine-protein kinase FLS2 [EC:2.7.11.1] | (RefSeq) LRR receptor-like serine/threonine-protein kinase FLS2 (A)	PREDICTED: uncharacterized protein LOC109133689 [Beta vulgaris subsp. vulgaris]	RecName: Full=Retrovirus-related Pol polyprotein from transposon RE1; AltName: Full=Retro element 1 {ECO:0000303|PubMed:10689195}; Short=AtRE1 {ECO:0000303|PubMed:10689195}; Includes: RecName: Full=Protease RE1; EC=3.4.23.-; Includes: RecName: Full=Reverse transcriptase RE1; EC=2.7.7.49; Includes: RecName: Full=Endonuclease RE1;	SubName: Full=Polypepetide with reverse transcriptase and RNaseH domains {ECO:0000313|EMBL:BAD99221.1};	FOG: Transposon-encoded proteins with TYA, reverse transcriptase, integrase domains in various combinations	GO:0006310,DNA recombination; GO:0004519,endonuclease activity; GO:0015074,DNA integration; GO:0004190,aspartic-type endopeptidase activity; GO:0003676,nucleic acid binding; GO:0003964,RNA-directed DNA polymerase activity; GO:0046872,metal ion binding	Reverse transcriptase (RNA-dependent DNA polymerase)
XLOC_035809	NW_018745291.1	1323997	1324463	.	K14677 aminoacylase [EC:3.5.1.14] | (RefSeq) uncharacterized protein LOC107892630 (A)	uncharacterized protein LOC110717303 [Chenopodium quinoa]	--	SubName: Full=Uncharacterized protein {ECO:0000313|EMBL:CCA66036.1};	FOG: Reverse transcriptase	GO:0003676,nucleic acid binding	--
XLOC_005995	NW_018742616.1	1490982	1491590	.	--	--	--	--	--	--	--
XLOC_000122	NW_018742204.1	11663589	11667969	+	K16189 phytochrome-interacting factor 4 | (RefSeq) transcription factor PIF4-like (A)	PREDICTED: transcription factor APG isoform X1 [Beta vulgaris subsp. vulgaris]	RecName: Full=Transcription factor PIF3; AltName: Full=Basic helix-loop-helix protein 8; Short=AtbHLH8; Short=bHLH 8; AltName: Full=Phytochrome-associated protein 3; AltName: Full=Phytochrome-interacting factor 3; AltName: Full=Transcription factor EN 100; AltName: Full=bHLH transcription factor bHLH008;	SubName: Full=Uncharacterized protein {ECO:0000313|EMBL:OWM73258.1};	--	GO:0031539,positive regulation of anthocyanin metabolic process; GO:0009585,red, far-red light phototransduction; GO:0009740,gibberellic acid mediated signaling pathway; GO:0003700,DNA-binding transcription factor activity; GO:0005634,nucleus; GO:0010017,red or far-red light signaling pathway; GO:0009704,de-etiolation; GO:0006355,regulation of transcription, DNA-templated; GO:0009639,response to …	--
XLOC_026492	NW_018744367.1	7695912	7696220	.	--	--	--	--	--	--	--
XLOC_008295	NW_018742815.1	4469991	4471030	+	--	uncharacterized protein LOC110686471 [Chenopodium quinoa]	--	SubName: Full=Uncharacterized protein {ECO:0000313|EMBL:CCA66036.1};	--	GO:0003676,nucleic acid binding	--
XLOC_014440	NW_018743285.1	3270323	3271726	.	K00384 thioredoxin reductase (NADPH) [EC:1.8.1.9] | (RefSeq) thioredoxin reductase 2-like (A)	glutathione S-transferase T3-like [Chenopodium quinoa]	RecName: Full=Glutathione S-transferase T3; Short=AtGSTT3; EC=2.5.1.18; AltName: Full=GST class-theta member 3; AltName: Full=Glutathione S-transferase 10C;	SubName: Full=Fgenesh protein 73 {ECO:0000313|EMBL:ABD83317.1};	--	GO:0005737,cytoplasm; GO:0005634,nucleus; GO:0004364,glutathione transferase activity; GO:0009407,toxin catabolic process; GO:0006749,glutathione metabolic process	--
XLOC_020175	NW_018743884.1	2596	3496	-	K10572 inositol-pentakisphosphate 2-kinase [EC:2.7.1.158] | (RefSeq) inositol-pentakisphosphate 2-kinase-like (A)	heavy metal-associated isoprenylated plant protein 2 [Quercus suber]	--	SubName: Full=Uncharacterized protein {ECO:0000313|EMBL:ONI32606.1};	--	GO:0046872,metal ion binding; GO:0030001,metal ion transport	--
XLOC_011751	NW_018743066.1	2375105	2375308	.	--	--	--	--	--	--	--
XLOC_015712	NW_018743331.1	6851735	6852289	.	--	--	--	--	--	--	--
XLOC_016691	NW_018743510.1	1007660	1012224	+	K23362 ethanolamine phosphate phosphodiesterase [EC:3.1.-.-] | (RefSeq) uncharacterized protein C630.12-like isoform X1 (A)	uncharacterized protein C630.12-like isoform X2 [Chenopodium quinoa]	--	SubName: Full=Uncharacterized protein {ECO:0000313|EMBL:KNA09611.1};	Cell division control protein/predicted DNA repair exonuclease	GO:0005737,cytoplasm; GO:0016787,hydrolase activity; GO:0016021,integral component of membrane; GO:0006888,ER to Golgi vesicle-mediated transport	--
XLOC_028802	NW_018744626.1	2946544	2954973	-	K15455 diphthamide biosynthesis protein 3 | (RefSeq) diphthamide biosynthesis protein 3-like (A)	diphthamide biosynthesis protein 3-like [Chenopodium quinoa]	--	SubName: Full=Uncharacterized protein {ECO:0000313|EMBL:KNA25652.1};	Uncharacterized conserved protein	GO:0046872,metal ion binding	CSL zinc finger
XLOC_007953	NW_018742798.1	2234131	2236426	-	--	--	--	--	--	--	--
XLOC_018975	NW_018743722.1	2792283	2795696	-	K02995 small subunit ribosomal protein S8e | (RefSeq) 40S ribosomal protein S8 (A)	LOW QUALITY PROTEIN: zf-BED domain-containing protein/DUF659 domain-containing protein/Dimer_Tnp_hAT domain-containing protein [Cephalotus follicularis]	--	SubName: Full=Zf-BED domain-containing protein/DUF659 domain-containing protein/Dimer_Tnp_hAT domain-containing protein {ECO:0000313|EMBL:GAV86993.1};	--	GO:0046983,protein dimerization activity; GO:0003677,DNA binding	Protein of unknown function (DUF 659)
XLOC_034818	NW_018745174.1	2099141	2099708	.	--	--	--	--	--	--	--
XLOC_015353	NW_018743292.1	13538472	13538914	.	--	--	--	--	--	--	--
XLOC_013294	NW_018743204.1	175038	175828	-	--	--	--	--	--	--	--
XLOC_017886	NW_018743593.1	3360515	3364863	-	--	--	--	--	--	--	--
XLOC_000052	NW_018742204.1	314663	315733	+	--	--	--	--	--	--	--
XLOC_036584	NW_018745413.1	246808	247205	.	--	--	--	--	--	--	--
XLOC_034450	NW_018745105.1	3971087	3971668	.	--	--	--	--	--	--	--
XLOC_038153	NW_018745540.1	838601	839370	+	--	--	--	--	--	--	Prenyltransferase and squalene oxidase repeat
XLOC_024582	NW_018744151.1	3486367	3488168	-	--	--	--	--	--	--	--
XLOC_032405	NW_018744991.1	1010309	1012789	+	K17506 protein phosphatase 1L [EC:3.1.3.16] | (RefSeq) probable protein phosphatase 2C 76 (A)	probable protein phosphatase 2C 76 [Chenopodium quinoa]	--	--	--	--	--
XLOC_024635	NW_018744151.1	3166907	3167726	.	--	hypothetical protein BVRB_8g183270 [Beta vulgaris subsp. vulgaris]	--	--	--	--	--
XLOC_025670	NW_018744298.1	497842	498180	.	--	uncharacterized protein LOC110736508 isoform X1 [Chenopodium quinoa]	--	--	--	--	--
XLOC_018089	NW_018743623.1	394312	394850	+	--	--	--	--	--	--	--
XLOC_002344	NW_018742329.1	7285171	7292750	-	K14376 poly(A) polymerase [EC:2.7.7.19] | (RefSeq) nuclear poly(A) polymerase 4-like (A)	uncharacterized protein LOC110689450 [Chenopodium quinoa]	RecName: Full=Nuclear poly(A) polymerase 2 {ECO:0000303|PubMed:18479511}; Short=PAP(II) {ECO:0000305}; Short=Poly(A) polymerase II {ECO:0000305}; EC=2.7.7.19 {ECO:0000269|PubMed:15297145}; AltName: Full=Polynucleotide adenylyltransferase 2 {ECO:0000305};	SubName: Full=Uncharacterized protein {ECO:0000313|EMBL:KNA24680.1};	Poly(A) polymerase and related nucleotidyltransferases	GO:0005737,cytoplasm; GO:0005634,nucleus; GO:0004652,polynucleotide adenylyltransferase activity; GO:0003723,RNA binding; GO:0043631,RNA polyadenylation; GO:0006378,mRNA polyadenylation; GO:0046872,metal ion binding; GO:0005524,ATP binding	--
XLOC_026373	NW_018744367.1	10042802	10050855	+	--	--	--	--	--	--	--
XLOC_027320	NW_018744502.1	2489937	2490161	.	--	--	--	--	--	--	--
XLOC_037859	NW_018745523.1	303937	304794	-	K21437 ankyrin repeat domain-containing protein 13 | (RefSeq) uncharacterized protein LOC112523844 (A)	zinc finger BED domain-containing protein RICESLEEPER 1-like [Chenopodium quinoa]	RecName: Full=Putative AC transposase; AltName: Full=ORFA;	SubName: Full=Uncharacterized protein {ECO:0000313|EMBL:KNA06017.1}; Flags: Fragment;	Tam3-transposase (Ac family)	GO:0006310,DNA recombination; GO:0046983,protein dimerization activity; GO:0032196,transposition; GO:0003677,DNA binding	--
XLOC_026717	NW_018744460.1	3007585	3007809	+	--	--	--	--	--	--	--
XLOC_023104	NW_018744072.1	2286520	2302739	-	--	--	--	--	--	--	--
XLOC_007730	NW_018742770.1	4001946	4004515	+	--	uncharacterized protein LOC110790072 [Spinacia oleracea]	--	SubName: Full=Uncharacterized protein {ECO:0000313|EMBL:KNA08564.1};	--	--	--
XLOC_006930	NW_018742726.1	633560	636826	+	--	--	--	--	--	--	--
XLOC_004425	NW_018742461.1	4430772	4431602	.	--	hypothetical protein BVRB_9g216510 [Beta vulgaris subsp. vulgaris]	--	SubName: Full=Uncharacterized protein {ECO:0000313|EMBL:OVA06980.1};	--	--	--
XLOC_010563	NW_018742980.1	2806088	2807123	.	--	--	--	--	--	--	--
XLOC_012636	NW_018743175.1	4018682	4018912	.	--	--	--	--	--	--	--
XLOC_008625	NW_018742861.1	1333531	1336775	-	K19984 exocyst complex component 5 | (RefSeq) uncharacterized protein LOC113272286 (A)	zinc finger BED domain-containing protein RICESLEEPER 2-like [Chenopodium quinoa]	RecName: Full=Zinc finger BED domain-containing protein RICESLEEPER 2; AltName: Full=Transposase-like protein RICESLEEPER 2;	SubName: Full=Uncharacterized protein {ECO:0000313|EMBL:EMJ14584.1};	Tam3-transposase (Ac family)	GO:0003700,DNA-binding transcription factor activity; GO:0005634,nucleus; GO:0009791,post-embryonic development; GO:0006357,regulation of transcription by RNA polymerase II; GO:0000977,RNA polymerase II regulatory region sequence-specific DNA binding; GO:0046983,protein dimerization activity; GO:0046872,metal ion binding; GO:0006351,transcription, DNA-templated	--
XLOC_034065	NW_018745067.1	339807	340085	.	--	--	--	--	--	--	--
XLOC_031147	NW_018744858.1	1369542	1371144	-	K01303 acylaminoacyl-peptidase [EC:3.4.19.1] | (RefSeq) uncharacterized LOC101311565 (A)	uncharacterized protein LOC107465802 [Arachis duranensis]	RecName: Full=RNA-directed DNA polymerase homolog; EC=2.7.7.48; AltName: Full=Reverse transcriptase homolog;	SubName: Full=Uncharacterized protein {ECO:0000313|EMBL:CAN80876.1};	FOG: Transposon-encoded proteins with TYA, reverse transcriptase, integrase domains in various combinations	GO:0003964,RNA-directed DNA polymerase activity; GO:0003968,RNA-directed 5'-3' RNA polymerase activity; GO:0005739,mitochondrion	--
XLOC_016868	NW_018743516.1	290757	290976	.	--	--	--	--	--	--	--
XLOC_000404	NW_018742204.1	1950762	1954092	-	K06943 nucleolar GTP-binding protein | (RefSeq) uncharacterized protein LOC108835530 (A)	uncharacterized protein LOC110737109 [Chenopodium quinoa]	RecName: Full=Uncharacterized mitochondrial protein AtMg00310; AltName: Full=ORF154;	SubName: Full=Retrotransposon protein, putative, unclassified {ECO:0000313|EMBL:ABF97084.1};	FOG: Reverse transcriptase	GO:0005739,mitochondrion	--
XLOC_036474	NW_018745410.1	7064562	7065934	.	--	--	--	--	--	--	--
XLOC_033870	NW_018745026.1	628805	630847	-	K17604 zinc finger SWIM domain-containing protein 3 | (RefSeq) protein FAR-RED IMPAIRED RESPONSE 1-like (A)	protein FAR-RED IMPAIRED RESPONSE 1-like [Chenopodium quinoa]	RecName: Full=Protein FAR1-RELATED SEQUENCE 5;	SubName: Full=FAR1 DNA binding domain {ECO:0000313|EMBL:OVA05733.1};	--	GO:0006355,regulation of transcription, DNA-templated; GO:0005634,nucleus; GO:0008270,zinc ion binding	MULE transposase domain
XLOC_030445	NW_018744718.1	283639	284434	.	--	--	--	--	--	--	--
XLOC_029374	NW_018744633.1	6442810	6443790	.	K14488 SAUR family protein | (RefSeq) auxin-induced protein 6B-like (A)	hypothetical protein SOVF_162740 [Spinacia oleracea]	RecName: Full=Auxin-responsive protein SAUR32 {ECO:0000305}; AltName: Full=Protein ABOLISHED APICAL HOOK MAINTENANCE 1 {ECO:0000303|Ref.6}; AltName: Full=Protein SMALL AUXIN UP RNA 32 {ECO:0000303|PubMed:12036261};	SubName: Full=Uncharacterized protein {ECO:0000313|EMBL:KNA08427.1};	--	GO:0005737,cytoplasm; GO:0009734,auxin-activated signaling pathway; GO:0005634,nucleus; GO:0007275,multicellular organism development; GO:1900140,regulation of seedling development; GO:0040008,regulation of growth	--
XLOC_024827	NW_018744221.1	1102	1318	.	--	uncharacterized protein LOC110707921 isoform X1 [Chenopodium quinoa]	--	--	--	--	--
XLOC_007133	NW_018742733.1	3624406	3625400	+	--	--	--	--	--	--	--
XLOC_007561	NW_018742763.1	6859920	6861531	+	--	--	--	--	--	--	--
XLOC_002764	NW_018742385.1	444962	449129	-	K12617 DNA topoisomerase 2-associated protein PAT1 | (RefSeq) uncharacterized protein LOC104825394 (A)	hypothetical protein BVRB_4g092630 [Beta vulgaris subsp. vulgaris]	--	SubName: Full=Uncharacterized protein {ECO:0000313|EMBL:KMS64713.1};	--	--	ATHILA ORF-1 family
XLOC_023028	NW_018744069.1	47934	49568	-	--	--	--	--	--	--	--
XLOC_036831	NW_018745448.1	9751472	9751902	.	--	--	--	--	--	--	--
XLOC_012164	NW_018743144.1	1959273	1960239	-	--	hypothetical protein SOVF_079290 [Spinacia oleracea]	--	SubName: Full=Uncharacterized protein {ECO:0000313|EMBL:KNA17511.1};	--	--	--
XLOC_003729	NW_018742418.1	1593859	1594245	.	--	uncharacterized protein LOC110702848 [Chenopodium quinoa]	--	--	--	--	--
XLOC_025770	NW_018744301.1	4705977	4706530	.	--	uncharacterized protein LOC110731440 [Chenopodium quinoa]	--	SubName: Full=Uncharacterized protein {ECO:0000313|EMBL:KNA02738.1}; Flags: Fragment;	--	--	--
XLOC_032896	NW_018745000.1	3173587	3176580	-	K15133 mediator of RNA polymerase II transcription subunit 17 | (RefSeq) mediator of RNA polymerase II transcription subunit 17-like (A)	mediator of RNA polymerase II transcription subunit 17-like [Chenopodium quinoa]	--	--	--	--	Domain of unknown function (DUF3805)
XLOC_027420	NW_018744517.1	59986	60454	.	--	--	--	--	--	--	--
XLOC_008555	NW_018742817.1	2660578	2661194	.	--	--	--	--	--	--	--
XLOC_024735	NW_018744167.1	1758663	1760243	-	--	uncharacterized protein LOC110716382 [Chenopodium quinoa]	--	SubName: Full=Uncharacterized protein {ECO:0000313|EMBL:KDP39427.1};	--	GO:0003676,nucleic acid binding	--
XLOC_018558	NW_018743691.1	1519790	1520234	.	--	U-box domain-containing protein 1 [Chenopodium quinoa]	--	SubName: Full=Uncharacterized protein {ECO:0000313|EMBL:KNA02707.1};	--	--	--
XLOC_038199	NW_018745540.1	552528	553816	.	K10406 kinesin family member C2/C3 | (RefSeq) kinesin KP1-like (A)	uncharacterized protein LOC110707488 [Chenopodium quinoa]	--	SubName: Full=Reverse transcriptase {ECO:0000313|EMBL:OMO87284.1};	FOG: Reverse transcriptase	GO:0003964,RNA-directed DNA polymerase activity; GO:0008270,zinc ion binding; GO:0003676,nucleic acid binding	--
XLOC_018982	NW_018743722.1	1477995	1478195	.	--	--	--	--	--	--	--
XLOC_021507	NW_018743937.1	696836	698251	-	--	--	--	--	--	--	--
XLOC_003226	NW_018742412.1	1868634	1868891	.	--	--	--	--	--	--	--
XLOC_023337	NW_018744080.1	1318099	1318322	.	--	--	--	--	--	--	--
XLOC_036728	NW_018745448.1	10260703	10263804	+	K11294 nucleolin | (RefSeq) nucleolin-like (A)	uncharacterized protein LOC110699536 [Chenopodium quinoa]	RecName: Full=Shionone synthase; Short=AtaSHS; EC=5.4.99.46;	SubName: Full=Endonuclease/exonuclease/phosphatase {ECO:0000313|EMBL:OMO74878.1};	FOG: Reverse transcriptase	GO:0031559,oxidosqualene cyclase activity; GO:0016104,triterpenoid biosynthetic process	--
XLOC_033912	NW_018745033.1	16	4012	-	--	--	--	--	--	--	--
XLOC_009027	NW_018742881.1	897195	897969	.	--	uncharacterized protein LOC110692945 [Chenopodium quinoa]	--	SubName: Full=Uncharacterized protein {ECO:0000313|EMBL:KNA07307.1};	--	GO:0016021,integral component of membrane	--
XLOC_005391	NW_018742564.1	441074	442336	+	K12173 BRCA1-A complex subunit BRE | (RefSeq) BRCA1-A complex subunit BRE-like (A)	cysteine-rich receptor-like protein kinase 15 [Chenopodium quinoa]	RecName: Full=Thaumatin-like protein 1 {ECO:0000303|PubMed:15988566}; Short=AtTLP1 {ECO:0000303|PubMed:15988566}; Flags: Precursor;	SubName: Full=Uncharacterized protein {ECO:0000313|EMBL:KNA09454.1}; Flags: Fragment;	--	GO:0009682,induced systemic resistance; GO:0009617,response to bacterium; GO:0009723,response to ethylene	Thaumatin family
XLOC_029982	NW_018744693.1	1220651	1221614	.	--	hypothetical protein BVRB_5g100890 [Beta vulgaris subsp. vulgaris]	--	SubName: Full=Uncharacterized protein {ECO:0000313|EMBL:KNA04286.1};	--	--	--
XLOC_003727	NW_018742418.1	1338115	1338888	.	K12822 RNA-binding protein 25 | (RefSeq) RNA-binding protein 25 isoform X1 (A)	RNA-binding protein 25 isoform X1 [Spinacia oleracea]	--	SubName: Full=Uncharacterized protein {ECO:0000313|EMBL:KNA24947.1};	U1 snRNP complex, subunit SNU71 and related PWI-motif proteins	GO:0003723,RNA binding; GO:0006397,mRNA processing	PWI domain
XLOC_006296	NW_018742651.1	720790	721526	.	--	--	--	--	--	--	--
XLOC_023755	NW_018744100.1	159323	161217	-	--	uncharacterized protein LOC110728660 [Chenopodium quinoa]	--	--	--	--	--
XLOC_001931	NW_018742263.1	6799731	6800289	.	--	--	--	--	--	--	--
XLOC_002173	NW_018742309.1	4706341	4707922	.	--	--	--	--	--	--	--
XLOC_024357	NW_018744143.1	1899558	1899905	.	--	zinc finger BED domain-containing protein RICESLEEPER 1-like [Chenopodium quinoa]	--	--	--	--	--
XLOC_007300	NW_018742733.1	1063421	1063980	.	--	--	--	--	--	--	--
XLOC_029371	NW_018744633.1	6232352	6232984	.	--	--	--	--	--	--	--
XLOC_026968	NW_018744469.1	3269636	3270107	.	--	--	--	--	--	--	--
XLOC_036460	NW_018745410.1	9754474	9757698	-	--	uncharacterized protein LOC110737391 isoform X2 [Chenopodium quinoa]	--	SubName: Full=Uncharacterized protein {ECO:0000313|EMBL:KNA07478.1}; Flags: Fragment;	--	--	--
XLOC_032635	NW_018744991.1	2025097	2025549	.	--	--	--	--	--	--	--
XLOC_013554	NW_018743212.1	4157027	4163130	+	--	putative F-box protein At5g52610 [Chenopodium quinoa]	--	--	--	--	--
XLOC_033086	NW_018745003.1	4126526	4128807	+	--	--	--	--	--	--	--
XLOC_025956	NW_018744311.1	476689	478172	+	K00558 DNA (cytosine-5)-methyltransferase 1 [EC:2.1.1.37] | (RefSeq) LOW QUALITY PROTEIN: DNA (cytosine-5)-methyltransferase CMT3-like (A)	hypothetical protein BVRB_4g071470 [Beta vulgaris subsp. vulgaris]	--	SubName: Full=uncharacterized protein LOC101506213 {ECO:0000313|RefSeq:XP_004504560.1};	--	GO:0016021,integral component of membrane	--
XLOC_015742	NW_018743332.1	759857	761203	.	--	uncharacterized protein LOC110710849 [Chenopodium quinoa]	--	--	--	--	--
XLOC_009218	NW_018742899.1	2869242	2870384	.	--	uncharacterized protein LOC110738285 [Chenopodium quinoa]	RecName: Full=Sigma factor binding protein 1, chloroplastic; Short=AtsibI; Short=Sigma factor binding protein I; AltName: Full=SigA binding protein; AltName: Full=VQ motif-containing protein 23 {ECO:0000303|PubMed:22535423}; Short=AtVQ23 {ECO:0000303|PubMed:22535423}; Flags: Precursor;	SubName: Full=Uncharacterized protein {ECO:0000313|EMBL:KNA10947.1};	--	GO:0009816,defense response to bacterium, incompatible interaction; GO:0051091,positive regulation of DNA-binding transcription factor activity; GO:0071482,cellular response to light stimulus; GO:0005634,nucleus; GO:0009507,chloroplast	--
XLOC_027165	NW_018744502.1	1522784	1524955	+	--	ribonuclease E/G-like protein, chloroplastic [Chenopodium quinoa]	--	SubName: Full=Uncharacterized protein {ECO:0000313|EMBL:KNA14101.1};	--	GO:0004540,ribonuclease activity; GO:0003723,RNA binding; GO:0006396,RNA processing	--
XLOC_016548	NW_018743448.1	457260	457536	.	K03040 DNA-directed RNA polymerase subunit alpha [EC:2.7.7.6] | (RefSeq) rpoA, CDC77_pgp031; RpoA (A)	RNA polymerase alpha subunit (chloroplast) [Chenopodium quinoa]	RecName: Full=DNA-directed RNA polymerase subunit alpha {ECO:0000255|HAMAP-Rule:MF_00059}; Short=PEP {ECO:0000255|HAMAP-Rule:MF_00059}; EC=2.7.7.6 {ECO:0000255|HAMAP-Rule:MF_00059}; AltName: Full=Plastid-encoded RNA polymerase subunit alpha {ECO:0000255|HAMAP-Rule:MF_00059}; Short=RNA polymerase subunit alpha {ECO:0000255|HAMAP-Rule:MF_00059};	RecName: Full=DNA-directed RNA polymerase subunit alpha {ECO:0000256|HAMAP-Rule:MF_00059}; Short=PEP {ECO:0000256|HAMAP-Rule:MF_00059}; EC=2.7.7.6 {ECO:0000256|HAMAP-Rule:MF_00059}; AltName: Full=Plastid-encoded RNA polymerase subunit alpha {ECO:0000256|HAMAP-Rule:MF_00059}; Short=RNA polymerase subunit alpha {ECO:0000256|HAMAP-Rule:MF_00059};	--	GO:0003899,DNA-directed 5'-3' RNA polymerase activity; GO:0046983,protein dimerization activity; GO:0009507,chloroplast; GO:0006351,transcription, DNA-templated; GO:0003677,DNA binding	--
XLOC_035855	NW_018745311.1	2893082	2893331	.	--	--	--	--	--	--	--
XLOC_035537	NW_018745281.1	3790629	3790947	.	--	--	--	--	--	--	--
XLOC_002076	NW_018742306.1	256824	257208	.	--	--	--	--	--	--	Mucin-like glycoprotein
XLOC_015202	NW_018743292.1	10462615	10466119	-	K07151 dolichyl-diphosphooligosaccharide---protein glycosyltransferase [EC:2.4.99.18] | (RefSeq) dolichyl-diphosphooligosaccharide--protein glycosyltransferase subunit STT3A (A)	dolichyl-diphosphooligosaccharide--protein glycosyltransferase subunit STT3A-like [Chenopodium quinoa]	RecName: Full=Dolichyl-diphosphooligosaccharide--protein glycosyltransferase subunit STT3A; Short=Oligosaccharyl transferase subunit STT3A; Short=STT3-A; EC=2.4.99.18; AltName: Full=Integral membrane protein 1; AltName: Full=Protein STAUROSPORIN AND TEMPERATURE SENSITIVE 3-LIKE A;	SubName: Full=Uncharacterized protein {ECO:0000313|EMBL:KNA10250.1};	Oligosaccharyltransferase, STT3 subunit	GO:0016021,integral component of membrane; GO:0005783,endoplasmic reticulum; GO:0047484,regulation of response to osmotic stress; GO:0043687,post-translational protein modification; GO:0016020,membrane; GO:0008250,oligosaccharyltransferase complex; GO:0005886,plasma membrane; GO:0009651,response to salt stress; GO:0004579,dolichyl-diphosphooligosaccharide-protein glycotransferase activity; GO:001…	--
XLOC_012447	NW_018743175.1	1717226	1718160	-	--	--	--	--	--	--	--
XLOC_011248	NW_018743033.1	1015759	1016855	.	--	--	--	--	--	--	--
XLOC_039503	NW_018745684.1	3416150	3416705	.	--	--	--	--	--	--	--
XLOC_012317	NW_018743175.1	3823013	3824326	+	--	--	--	--	--	--	--
XLOC_004855	NW_018742484.1	2346010	2346255	.	K00924 kinase [EC:2.7.1.-] | (RefSeq) candidapepsin-7-like (A)	uncharacterized protein LOC110716762 [Chenopodium quinoa]	--	SubName: Full=Uncharacterized protein {ECO:0000313|EMBL:KNA06661.1}; Flags: Fragment;	FOG: Reverse transcriptase	GO:0008270,zinc ion binding; GO:0003676,nucleic acid binding	Zinc knuckle
XLOC_008866	NW_018742879.1	3709634	3711524	-	--	zinc finger MYM-type protein 1-like [Chenopodium quinoa]	--	--	--	--	--
XLOC_033330	NW_018745003.1	5213216	5213739	.	--	--	--	--	--	--	--
XLOC_025344	NW_018744284.1	1974001	1975267	+	K19984 exocyst complex component 5 | (RefSeq) uncharacterized protein LOC113272286 (A)	zinc finger BED domain-containing protein RICESLEEPER 2-like [Spinacia oleracea]	RecName: Full=Putative AC transposase; AltName: Full=ORFA;	SubName: Full=Uncharacterized protein {ECO:0000313|EMBL:KNA13143.1};	Tam3-transposase (Ac family)	GO:0006310,DNA recombination; GO:0046983,protein dimerization activity; GO:0032196,transposition; GO:0003677,DNA binding	Domain of unknown function (DUF4413)
XLOC_003732	NW_018742418.1	2444939	2445413	.	--	--	--	--	--	--	Wnt and FGF inhibitory regulator
XLOC_019190	NW_018743791.1	425771	432367	+	K09761 16S rRNA (uracil1498-N3)-methyltransferase [EC:2.1.1.193] | (RefSeq) uncharacterized protein LOC110739987 (A)	uncharacterized protein LOC110739987 [Chenopodium quinoa]	--	SubName: Full=Uncharacterized protein {ECO:0000313|EMBL:KNA17258.1};	--	GO:0008168,methyltransferase activity; GO:0006364,rRNA processing	--
XLOC_010416	NW_018742969.1	1163464	1163698	.	--	uncharacterized protein LOC110707923 [Chenopodium quinoa]	--	--	--	--	--
XLOC_039144	NW_018745684.1	7674278	7675576	+	K23288 syndetin | (RefSeq) uncharacterized LOC105761952 (A)	uncharacterized protein LOC110686079 [Chenopodium quinoa]	RecName: Full=Retrovirus-related Pol polyprotein from transposon RE1; AltName: Full=Retro element 1 {ECO:0000303|PubMed:10689195}; Short=AtRE1 {ECO:0000303|PubMed:10689195}; Includes: RecName: Full=Protease RE1; EC=3.4.23.-; Includes: RecName: Full=Reverse transcriptase RE1; EC=2.7.7.49; Includes: RecName: Full=Endonuclease RE1;	SubName: Full=Putative gag-polypeptide of LTR copia-type {ECO:0000313|EMBL:OTF95102.1};	FOG: Transposon-encoded proteins with TYA, reverse transcriptase, integrase domains in various combinations	GO:0006310,DNA recombination; GO:0004519,endonuclease activity; GO:0015074,DNA integration; GO:0004190,aspartic-type endopeptidase activity; GO:0003676,nucleic acid binding; GO:0003964,RNA-directed DNA polymerase activity; GO:0046872,metal ion binding	--
XLOC_000810	NW_018742204.1	19410736	19411994	.	--	dual specificity protein kinase shkC-like [Chenopodium quinoa]	RecName: Full=Integrin-linked protein kinase 1 {ECO:0000303|PubMed:27208244}; EC=2.7.11.1 {ECO:0000269|PubMed:27208244}; AltName: Full=Ankyrin protein kinase 1 {ECO:0000303|PubMed:12650621};	SubName: Full=Uncharacterized protein {ECO:0000313|EMBL:KNA22101.1};	Tyrosine kinase specific for activated (GTP-bound) p21cdc42Hs	GO:0005783,endoplasmic reticulum; GO:0045087,innate immune response; GO:0009898,cytoplasmic side of plasma membrane; GO:0005789,endoplasmic reticulum membrane; GO:0004674,protein serine/threonine kinase activity; GO:0004712,protein serine/threonine/tyrosine kinase activity; GO:0004871,NA; GO:0004672,protein kinase activity; GO:0006970,response to osmotic stress; GO:0035556,intracellular signal tr…	--
XLOC_034394	NW_018745105.1	2179165	2181809	+	--	--	--	--	--	--	--
XLOC_014163	NW_018743280.1	17184	17995	-	--	--	--	--	--	--	--
XLOC_009878	NW_018742914.1	5947213	5947565	.	K18195 rhamnogalacturonan endolyase [EC:4.2.2.23] | (RefSeq) probable rhamnogalacturonate lyase B (A)	uncharacterized protein LOC110687178 [Chenopodium quinoa]	--	SubName: Full=Putative integrase {ECO:0000313|EMBL:ABH08430.1};	FOG: Transposon-encoded proteins with TYA, reverse transcriptase, integrase domains in various combinations	GO:0015074,DNA integration; GO:0008270,zinc ion binding; GO:0003676,nucleic acid binding	--
XLOC_003051	NW_018742393.1	1362016	1362544	.	K20000 maturase K | (RefSeq) matK, EucgrC_p002; maturase K (A)	maturase K (chloroplast) [Gymnocalycium nataliae]	RecName: Full=Maturase K {ECO:0000255|HAMAP-Rule:MF_01390}; AltName: Full=Intron maturase {ECO:0000255|HAMAP-Rule:MF_01390};	RecName: Full=Maturase K {ECO:0000256|HAMAP-Rule:MF_01390, ECO:0000256|SAAS:SAAS00959639}; AltName: Full=Intron maturase {ECO:0000256|HAMAP-Rule:MF_01390};	--	GO:0009507,chloroplast; GO:0008033,tRNA processing; GO:0003723,RNA binding; GO:0006397,mRNA processing	MatK/TrnK amino terminal region
XLOC_027318	NW_018744502.1	1939797	1941129	.	--	--	--	--	--	--	--
XLOC_026595	NW_018744445.1	42432	42780	-	--	uncharacterized protein LOC110695802 [Chenopodium quinoa]	--	--	--	--	--
XLOC_012052	NW_018743099.1	1313504	1313786	.	--	--	--	--	--	--	--
XLOC_022602	NW_018744041.1	1345177	1346502	-	--	uncharacterized protein LOC110714373 [Chenopodium quinoa]	--	--	--	--	--
XLOC_020612	NW_018743919.1	776464	786478	-	--	--	--	--	--	--	--
XLOC_002739	NW_018742381.1	2214292	2214572	.	--	uncharacterized protein LOC110776783 [Spinacia oleracea]	--	SubName: Full=uncharacterized protein LOC109014217 {ECO:0000313|RefSeq:XP_018852129.1};	--	--	--
XLOC_007522	NW_018742738.1	9666432	9667843	.	--	uncharacterized protein LOC110708979 [Chenopodium quinoa]	--	--	--	--	--
XLOC_001969	NW_018742279.1	4334	5273	.	--	hypothetical protein SOVF_193690 [Spinacia oleracea]	--	SubName: Full=Uncharacterized protein {ECO:0000313|EMBL:KNA05079.1};	--	GO:0016021,integral component of membrane	--
XLOC_033743	NW_018745024.1	10232092	10234450	-	K23288 syndetin | (RefSeq) uncharacterized LOC105761952 (A)	uncharacterized protein LOC110686079 [Chenopodium quinoa]	RecName: Full=Retrovirus-related Pol polyprotein from transposon RE1; AltName: Full=Retro element 1 {ECO:0000303|PubMed:10689195}; Short=AtRE1 {ECO:0000303|PubMed:10689195}; Includes: RecName: Full=Protease RE1; EC=3.4.23.-; Includes: RecName: Full=Reverse transcriptase RE1; EC=2.7.7.49; Includes: RecName: Full=Endonuclease RE1;	SubName: Full=Putative gag-polypeptide of LTR copia-type {ECO:0000313|EMBL:OTG06567.1};	FOG: Transposon-encoded proteins with TYA, reverse transcriptase, integrase domains in various combinations	GO:0006310,DNA recombination; GO:0004519,endonuclease activity; GO:0015074,DNA integration; GO:0004190,aspartic-type endopeptidase activity; GO:0003676,nucleic acid binding; GO:0003964,RNA-directed DNA polymerase activity; GO:0046872,metal ion binding	--
XLOC_011094	NW_018743021.1	1108330	1109327	.	--	hypothetical protein BVRB_5g125770 [Beta vulgaris subsp. vulgaris]	--	SubName: Full=Uncharacterized protein {ECO:0000313|EMBL:KMS97608.1};	--	--	--
XLOC_006196	NW_018742651.1	984438	986162	+	--	uncharacterized protein LOC110728660 [Chenopodium quinoa]	--	--	--	--	--
XLOC_023714	NW_018744093.1	3607516	3608645	.	--	uncharacterized protein LOC110712499 [Chenopodium quinoa]	--	--	--	--	--
XLOC_022329	NW_018743987.1	433363	436680	+	K07052 uncharacterized protein | (RefSeq) uncharacterized protein LOC110683884 (A)	uncharacterized protein LOC110683884 [Chenopodium quinoa]	RecName: Full=Ran-binding protein 1 homolog c;	SubName: Full=Uncharacterized protein {ECO:0000313|EMBL:KNA02657.1};	Ran-binding protein RANBP1 and related RanBD domain proteins	GO:0005737,cytoplasm; GO:0043547,positive regulation of GTPase activity; GO:0005643,nuclear pore; GO:0000060,protein import into nucleus, translocation; GO:0005634,nucleus; GO:0000082,G1/S transition of mitotic cell cycle; GO:0007051,spindle organization; GO:0006511,ubiquitin-dependent protein catabolic process; GO:0008536,Ran GTPase binding; GO:0051028,mRNA transport; GO:0006405,RNA export from …	RanBP1 domain
XLOC_001967	NW_018742275.1	35406	36092	.	--	--	--	--	--	--	--
XLOC_027735	NW_018744537.1	5248154	5254604	-	--	uncharacterized protein LOC110712106 [Chenopodium quinoa]	--	--	--	--	Protein of unknown function (DUF730)
XLOC_017774	NW_018743574.1	6093743	6094365	.	--	uncharacterized protein LOC110711467 [Chenopodium quinoa]	--	SubName: Full=Uncharacterized protein {ECO:0000313|EMBL:KNA24229.1};	--	GO:0016810,hydrolase activity, acting on carbon-nitrogen (but not peptide) bonds	--
XLOC_031217	NW_018744874.1	864993	867631	+	--	hypothetical protein BVRB_9g218250 [Beta vulgaris subsp. vulgaris]	--	SubName: Full=Uncharacterized protein {ECO:0000313|EMBL:KNA14589.1};	--	--	--
XLOC_017152	NW_018743572.1	432721	433892	+	--	--	--	--	--	--	--
XLOC_018014	NW_018743616.1	950903	955527	-	--	--	--	--	--	--	--
XLOC_038796	NW_018745653.1	495510	496774	.	--	--	--	--	--	--	--
XLOC_026860	NW_018744460.1	1863049	1863731	.	K18195 rhamnogalacturonan endolyase [EC:4.2.2.23] | (RefSeq) probable rhamnogalacturonate lyase B (A)	integrase [Beta vulgaris]	RecName: Full=Retrovirus-related Pol polyprotein from transposon RE1; AltName: Full=Retro element 1 {ECO:0000303|PubMed:10689195}; Short=AtRE1 {ECO:0000303|PubMed:10689195}; Includes: RecName: Full=Protease RE1; EC=3.4.23.-; Includes: RecName: Full=Reverse transcriptase RE1; EC=2.7.7.49; Includes: RecName: Full=Endonuclease RE1;	SubName: Full=Integrase {ECO:0000313|EMBL:ABM55238.1};	FOG: Transposon-encoded proteins with TYA, reverse transcriptase, integrase domains in various combinations	GO:0006310,DNA recombination; GO:0004519,endonuclease activity; GO:0015074,DNA integration; GO:0004190,aspartic-type endopeptidase activity; GO:0003676,nucleic acid binding; GO:0003964,RNA-directed DNA polymerase activity; GO:0046872,metal ion binding	--
XLOC_036519	NW_018745413.1	5487989	5488926	+	--	--	--	--	--	--	--
XLOC_009272	NW_018742903.1	2533759	2535185	.	--	--	--	--	--	--	--
XLOC_002737	NW_018742381.1	1867719	1868596	.	--	hypothetical protein BVRB_5g126040 [Beta vulgaris subsp. vulgaris]	--	SubName: Full=Uncharacterized protein {ECO:0000313|EMBL:KMS97543.1};	--	--	--
XLOC_013229	NW_018743199.1	3758816	3759158	.	--	hypothetical protein SOVF_204160 [Spinacia oleracea]	--	SubName: Full=Uncharacterized protein {ECO:0000313|EMBL:KNA03966.1};	--	--	--
XLOC_025666	NW_018744298.1	480108	495634	-	K17604 zinc finger SWIM domain-containing protein 3 | (RefSeq) protein FAR-RED IMPAIRED RESPONSE 1-like (A)	protein FAR1-RELATED SEQUENCE 1-like [Chenopodium quinoa]	RecName: Full=Putative AC transposase; AltName: Full=ORFA;	SubName: Full=Uncharacterized protein {ECO:0000313|EMBL:EMJ14584.1};	Tam3-transposase (Ac family)	GO:0006310,DNA recombination; GO:0046983,protein dimerization activity; GO:0032196,transposition; GO:0003677,DNA binding	--
XLOC_034893	NW_018745177.1	1629267	1632067	-	--	--	--	--	--	--	--
XLOC_002563	NW_018742345.1	8862050	8862643	.	K06676 condensin complex subunit 2 | (RefSeq) condensin complex subunit 2-like isoform X1 (A)	condensin complex subunit 2-like isoform X1 [Chenopodium quinoa]	--	RecName: Full=Condensin complex subunit 2 {ECO:0000256|PIRNR:PIRNR017126};	--	GO:0007076,mitotic chromosome condensation; GO:0000796,condensin complex; GO:0051301,cell division	--
XLOC_000883	NW_018742205.1	1625347	1626442	+	--	disease resistance protein RGA2-like [Chenopodium quinoa]	--	SubName: Full=Uncharacterized protein {ECO:0000313|EMBL:KNA19706.1};	--	GO:0043531,ADP binding	--
XLOC_029683	NW_018744662.1	394905	395120	.	--	--	--	--	--	--	--
XLOC_010414	NW_018742969.1	719888	720766	.	--	--	--	--	--	--	--
XLOC_021541	NW_018743937.1	4508183	4508622	.	--	--	--	--	--	--	--
XLOC_012828	NW_018743197.1	2770653	2771526	+	--	uncharacterized protein LOC110697275 [Chenopodium quinoa]	--	SubName: Full=Uncharacterized protein {ECO:0000313|EMBL:KNA11284.1};	--	--	Cell division control protein 24, OB domain 1
XLOC_001288	NW_018742205.1	4726949	4727185	.	--	--	--	--	--	--	--
XLOC_006291	NW_018742651.1	4640328	4641175	-	--	--	--	--	--	--	--
XLOC_033295	NW_018745003.1	446142	446788	.	K22378 E3 ubiquitin-protein ligase RNF181 [EC:2.3.2.27] | (RefSeq) E3 ubiquitin-protein ligase RZF1-like (A)	hypothetical protein BVRB_8g197400 [Beta vulgaris subsp. vulgaris]	RecName: Full=E3 ubiquitin-protein ligase RDUF1 {ECO:0000305}; EC=2.3.2.27 {ECO:0000305}; AltName: Full=RING and DUF1117 domain-containing protein 1 {ECO:0000305}; Short=AtRDUF1 {ECO:0000303|PubMed:22405823}; AltName: Full=RING-type E3 ubiquitin transferase RDUF1 {ECO:0000305};	SubName: Full=Uncharacterized protein {ECO:0000313|EMBL:KNA05680.1};	FOG: Predicted E3 ubiquitin ligase	GO:0005737,cytoplasm; GO:0009737,response to abscisic acid; GO:0010200,response to chitin; GO:0061630,ubiquitin protein ligase activity; GO:0005829,cytosol; GO:0009738,abscisic acid-activated signaling pathway; GO:0005634,nucleus; GO:0051865,protein autoubiquitination; GO:0042787,NA; GO:0009414,response to water deprivation; GO:0043161,proteasome-mediated ubiquitin-dependent protein catabolic pro…	--
XLOC_018519	NW_018743691.1	3109407	3109833	-	--	--	--	--	--	--	--
XLOC_000792	NW_018742204.1	16122973	16123172	.	--	--	--	--	--	--	--
XLOC_019062	NW_018743765.1	81182	81459	.	--	--	--	--	--	--	--
XLOC_011148	NW_018743032.1	1487265	1488630	.	--	--	--	--	--	--	--
XLOC_031028	NW_018744845.1	1169517	1173243	-	--	--	--	--	--	--	--
XLOC_022332	NW_018743987.1	682595	684395	+	--	--	--	--	--	--	--
XLOC_030135	NW_018744704.1	1717611	1720211	-	--	uncharacterized protein LOC110686067 isoform X2 [Chenopodium quinoa]	--	SubName: Full=Embryo defective 1273, putative isoform 2 {ECO:0000313|EMBL:EOX98174.1}; Flags: Fragment;	--	GO:0016021,integral component of membrane	--
XLOC_005940	NW_018742616.1	2041422	2041952	-	--	--	--	--	--	--	--
XLOC_008698	NW_018742879.1	1100619	1105633	+	K22696 protein-lysine N-methyltransferase EEF2KMT [EC:2.1.1.-] | (RefSeq) uncharacterized protein LOC108202480 isoform X1 (A)	uncharacterized protein LOC110691306 [Chenopodium quinoa]	--	SubName: Full=Mariner transposase {ECO:0000313|EMBL:AFK13835.1};	--	--	--
XLOC_034427	NW_018745105.1	2787616	2789104	-	--	hypothetical protein SOVF_114540 [Spinacia oleracea]	--	SubName: Full=Uncharacterized protein {ECO:0000313|EMBL:KNA13670.1};	--	--	--
XLOC_038627	NW_018745650.1	4207292	4209871	+	--	--	--	--	--	--	--
XLOC_017163	NW_018743572.1	1416397	1418340	-	--	uncharacterized protein LOC110700232 [Chenopodium quinoa]	--	SubName: Full=Uncharacterized protein {ECO:0000313|EMBL:KNA10379.1}; Flags: Fragment;	--	--	--
XLOC_016593	NW_018743476.1	3116047	3118681	-	--	--	--	--	--	--	--
XLOC_007313	NW_018742733.1	2801160	2801569	.	--	--	--	--	--	--	--
XLOC_036603	NW_018745419.1	1	2187	-	--	TSL-kinase interacting protein 1-like isoform X3 [Chenopodium quinoa]	RecName: Full=TSL-kinase interacting protein 1; AltName: Full=Myb-related protein TKI1;	SubName: Full=Uncharacterized protein {ECO:0000313|EMBL:KNA22481.1};	Polycomb-group transcriptional regulator	GO:0006355,regulation of transcription, DNA-templated; GO:0005634,nucleus; GO:0003682,chromatin binding; GO:0006351,transcription, DNA-templated; GO:0003677,DNA binding	--
XLOC_035067	NW_018745217.1	45871	49045	+	--	--	--	--	--	--	--
XLOC_026510	NW_018744369.1	214442	215411	-	K22817 non-structural maintenance of chromosomes element 1 [EC:2.3.2.27] | (RefSeq) LOW QUALITY PROTEIN: non-structural maintenance of chromosomes element 1 homolog (A)	LOW QUALITY PROTEIN: non-structural maintenance of chromosomes element 1 homolog [Chenopodium quinoa]	--	SubName: Full=Uncharacterized protein {ECO:0000313|EMBL:KNA23209.1};	--	GO:0030915,Smc5-Smc6 complex; GO:0006281,DNA repair	--
XLOC_034940	NW_018745177.1	2267112	2268977	.	K06943 nucleolar GTP-binding protein | (RefSeq) uncharacterized protein LOC108835530 (A)	uncharacterized protein LOC110688597 [Chenopodium quinoa]	RecName: Full=Uncharacterized mitochondrial protein AtMg00310; AltName: Full=ORF154;	SubName: Full=Uncharacterized protein {ECO:0000313|EMBL:CCA66050.1};	FOG: Reverse transcriptase	GO:0005739,mitochondrion	--
XLOC_021600	NW_018743942.1	2044964	2045262	.	K05666 ATP-binding cassette, subfamily C (CFTR/MRP), member 2 | (RefSeq) ABC transporter C family member 10-like isoform X1 (A)	PREDICTED: ABC transporter C family member 10-like [Nelumbo nucifera]	RecName: Full=ABC transporter C family member 10; Short=ABC transporter ABCC.10; Short=AtABCC10; EC=3.6.3.44; AltName: Full=ATP-energized glutathione S-conjugate pump 14; AltName: Full=Glutathione S-conjugate-transporting ATPase 14; AltName: Full=Multidrug resistance-associated protein 14;	SubName: Full=Uncharacterized protein {ECO:0000313|EnsemblPlants:PGSC0003DMT400023486};	Multidrug resistance-associated protein/mitoxantrone resistance protein, ABC superfamily	GO:0000325,plant-type vacuole; GO:0016021,integral component of membrane; GO:0042626,ATPase activity, coupled to transmembrane movement of substances; GO:0005774,vacuolar membrane; GO:0008559,xenobiotic transmembrane transporting ATPase activity; GO:0055085,transmembrane transport; GO:0005524,ATP binding	--
XLOC_002813	NW_018742390.1	7726449	7727663	+	--	--	--	--	--	--	--
XLOC_036376	NW_018745410.1	1760279	1762060	+	K08856 serine/threonine kinase 16 [EC:2.7.11.1] | (RefSeq) probable serine/threonine-protein kinase DDB_G0291350 (A)	uncharacterized protein LOC110733363 [Chenopodium quinoa]	--	SubName: Full=Uncharacterized protein {ECO:0000313|EMBL:KNA24616.1};	Serine/threonine protein kinase/TGF-beta stimulated factor	--	--
XLOC_000803	NW_018742204.1	18726641	18727764	.	--	hypothetical protein SOVF_113330 [Spinacia oleracea]	--	SubName: Full=Uncharacterized protein {ECO:0000313|EMBL:KNA13811.1};	--	GO:0016021,integral component of membrane	--
XLOC_023119	NW_018744072.1	817991	818251	.	--	uncharacterized protein LOC110720729 [Chenopodium quinoa]	--	--	--	--	--
XLOC_003691	NW_018742418.1	8810815	8814566	-	K21437 ankyrin repeat domain-containing protein 13 | (RefSeq) uncharacterized protein LOC112523844 (A)	zinc finger BED domain-containing protein RICESLEEPER 2-like [Chenopodium quinoa]	RecName: Full=Zinc finger BED domain-containing protein RICESLEEPER 2; AltName: Full=Transposase-like protein RICESLEEPER 2;	SubName: Full=Uncharacterized protein {ECO:0000313|EMBL:EMJ14584.1};	Tam3-transposase (Ac family)	GO:0003700,DNA-binding transcription factor activity; GO:0005634,nucleus; GO:0009791,post-embryonic development; GO:0006357,regulation of transcription by RNA polymerase II; GO:0000977,RNA polymerase II regulatory region sequence-specific DNA binding; GO:0046983,protein dimerization activity; GO:0046872,metal ion binding; GO:0006351,transcription, DNA-templated	--
XLOC_039510	NW_018745684.1	4885990	4886293	.	--	uncharacterized protein LOC110694792 [Chenopodium quinoa]	--	--	--	--	--
XLOC_013753	NW_018743212.1	128979	129392	.	--	--	--	--	--	--	--
XLOC_017066	NW_018743555.1	165606	166703	+	--	--	--	--	--	--	--
XLOC_027078	NW_018744501.1	835190	839209	+	K03006 DNA-directed RNA polymerase II subunit RPB1 [EC:2.7.7.6] | (RefSeq) LOW QUALITY PROTEIN: DNA-directed RNA polymerase II subunit 1-like (A)	Putative gag-pol polyprotein, identical [Solanum demissum]	RecName: Full=Retrovirus-related Pol polyprotein from transposon TNT 1-94; Includes: RecName: Full=Protease; EC=3.4.23.-; Includes: RecName: Full=Reverse transcriptase; EC=2.7.7.49; Includes: RecName: Full=Endonuclease;	SubName: Full=Putative gag-pol polyprotein, identical {ECO:0000313|EMBL:AAT38758.1};	FOG: Transposon-encoded proteins with TYA, reverse transcriptase, integrase domains in various combinations	GO:0004519,endonuclease activity; GO:0015074,DNA integration; GO:0004190,aspartic-type endopeptidase activity; GO:0008270,zinc ion binding; GO:0003676,nucleic acid binding; GO:0003964,RNA-directed DNA polymerase activity	Reverse transcriptase (RNA-dependent DNA polymerase)
XLOC_014817	NW_018743292.1	12160449	12181811	+	K10206 LL-diaminopimelate aminotransferase [EC:2.6.1.83] | (RefSeq) LL-diaminopimelate aminotransferase, chloroplastic-like (A)	LL-diaminopimelate aminotransferase, chloroplastic-like [Chenopodium quinoa]	RecName: Full=LL-diaminopimelate aminotransferase, chloroplastic; Short=AtDAP-AT; Short=DAP-AT; Short=DAP-aminotransferase; Short=LL-DAP-aminotransferase; EC=2.6.1.83 {ECO:0000269|PubMed:16361515, ECO:0000269|PubMed:17583737}; AltName: Full=Protein ABERRANT GROWTH AND DEATH 2; Flags: Precursor;	SubName: Full=Uncharacterized protein {ECO:0000313|EMBL:KNA10841.1}; Flags: Fragment;	Kynurenine aminotransferase, glutamine transaminase K	GO:0009735,response to cytokinin; GO:0010285,L,L-diaminopimelate aminotransferase activity; GO:0009862,systemic acquired resistance, salicylic acid mediated signaling pathway; GO:0008483,transaminase activity; GO:0009089,lysine biosynthetic process via diaminopimelate; GO:0030170,pyridoxal phosphate binding; GO:0009570,chloroplast stroma; GO:0005507,copper ion binding; GO:0009507,chloroplast	Aminotransferase class I and II
XLOC_002355	NW_018742329.1	763572	763961	.	--	--	--	--	--	--	--
XLOC_035811	NW_018745293.1	20064	20354	-	--	hypothetical protein JCGZ_22036 [Jatropha curcas]	--	SubName: Full=Uncharacterized protein {ECO:0000313|EMBL:KDP27127.1};	--	--	--
XLOC_038593	NW_018745649.1	106577	107285	-	--	--	--	--	--	--	--
XLOC_010411	NW_018742969.1	696749	697293	.	--	--	--	--	--	--	--
XLOC_028053	NW_018744582.1	1953145	1954000	.	--	--	--	--	--	--	--
XLOC_025387	NW_018744284.1	963695	964068	.	--	--	--	--	--	--	--
XLOC_025292	NW_018744268.1	2054503	2061441	+	--	--	--	--	--	--	--
XLOC_035073	NW_018745223.1	23693	24138	.	--	--	--	--	--	--	--
XLOC_026478	NW_018744367.1	610696	610913	.	--	protein MAIN-LIKE 1-like [Chenopodium quinoa]	--	--	--	--	--
XLOC_026250	NW_018744348.1	526618	526936	.	--	--	--	--	--	--	--
XLOC_025805	NW_018744304.1	4958837	4960489	+	--	uncharacterized protein LOC110723190 [Chenopodium quinoa]	--	--	--	--	Cell division protein CrgA
XLOC_007372	NW_018742738.1	9790594	9792080	+	K10393 kinesin family member 2/24 | (RefSeq) kinesin-13A-like (A)	uncharacterized protein LOC110738956 [Chenopodium quinoa]	--	SubName: Full=uncharacterized protein LOC104211089 {ECO:0000313|RefSeq:XP_009758389.1};	FOG: Reverse transcriptase	--	--
XLOC_016616	NW_018743503.1	140576	147175	+	K01303 acylaminoacyl-peptidase [EC:3.4.19.1] | (RefSeq) uncharacterized LOC101311565 (A)	uncharacterized protein LOC110724165 isoform X2 [Chenopodium quinoa]	RecName: Full=RNA-directed DNA polymerase homolog; EC=2.7.7.48; AltName: Full=Reverse transcriptase homolog;	SubName: Full=Uncharacterized protein {ECO:0000313|EMBL:KOM35206.1};	FOG: Transposon-encoded proteins with TYA, reverse transcriptase, integrase domains in various combinations	GO:0003964,RNA-directed DNA polymerase activity; GO:0003968,RNA-directed 5'-3' RNA polymerase activity; GO:0005739,mitochondrion	--
XLOC_009225	NW_018742903.1	340490	341119	+	K17362 acyl-coenzyme A thioesterase 13 [EC:3.1.2.-] | (RefSeq) acyl-coenzyme A thioesterase 13-like (A)	acyl-coenzyme A thioesterase 13-like [Chenopodium quinoa]	--	SubName: Full=Uncharacterized protein {ECO:0000313|EMBL:KNA11780.1};	HGG motif-containing thioesterase	--	--
XLOC_039093	NW_018745684.1	5471033	5475738	+	--	uncharacterized protein LOC110802277 [Spinacia oleracea]	--	SubName: Full=Uncharacterized protein {ECO:0000313|EMBL:KNA08629.1};	Predicted membrane protein, contains DoH and Cytochrome b-561/ferric reductase transmembrane domains	GO:0016021,integral component of membrane	--
XLOC_004420	NW_018742461.1	4100905	4101458	.	K14488 SAUR family protein | (RefSeq) auxin-responsive protein SAUR21-like (A)	auxin-responsive protein SAUR21-like [Spinacia oleracea]	RecName: Full=Auxin-responsive protein SAUR21 {ECO:0000305}; AltName: Full=Protein SMALL AUXIN UP RNA 21 {ECO:0000303|PubMed:12036261};	SubName: Full=Uncharacterized protein {ECO:0000313|EMBL:KNA15365.1};	--	GO:0040008,regulation of growth; GO:0005886,plasma membrane; GO:0007275,multicellular organism development; GO:0009734,auxin-activated signaling pathway	Auxin responsive protein
XLOC_038247	NW_018745546.1	1650711	1652579	+	--	--	--	--	--	--	--
XLOC_006146	NW_018742630.1	2828780	2830598	.	--	uncharacterized protein LOC110728660 [Chenopodium quinoa]	--	--	--	--	--
XLOC_030179	NW_018744704.1	1736832	1737103	.	--	--	--	--	--	--	--
XLOC_002212	NW_018742329.1	2273346	2286932	+	--	--	--	--	--	--	--
XLOC_016249	NW_018743391.1	2595673	2596302	.	--	--	--	--	--	--	--
XLOC_005346	NW_018742556.1	1151674	1152398	.	K07904 Ras-related protein Rab-11A | (RefSeq) ras-related protein Rab11D-like (A)	uncharacterized protein LOC110717807 [Chenopodium quinoa]	--	--	--	--	--
XLOC_039005	NW_018745684.1	2926287	2929675	+	K15255 ATP-dependent DNA helicase PIF1 [EC:3.6.4.12] | (RefSeq) uncharacterized protein LOC109757034 (A)	putative disease resistance protein RGA3 [Chenopodium quinoa]	RecName: Full=Putative disease resistance protein RGA3; AltName: Full=Blight resistance protein B149; AltName: Full=RGA1-blb;	SubName: Full=NBS-LRR type resistance protein {ECO:0000313|EMBL:ABJ99599.1};	DNA helicase PIF1/RRM3	GO:0006952,defense response; GO:0005524,ATP binding; GO:0043531,ADP binding	--
XLOC_001330	NW_018742206.1	217054	217483	.	--	--	--	--	--	--	--
XLOC_017135	NW_018743555.1	3576362	3577639	-	--	hypothetical protein BVRB_014450 [Beta vulgaris subsp. vulgaris]	--	SubName: Full=Uncharacterized protein {ECO:0000313|EMBL:KMS94878.1};	--	GO:0016021,integral component of membrane	--
XLOC_030858	NW_018744828.1	51981	53977	.	K06943 nucleolar GTP-binding protein | (RefSeq) uncharacterized protein LOC108835530 (A)	PREDICTED: uncharacterized protein LOC104906342 [Beta vulgaris subsp. vulgaris]	RecName: Full=Putative ribonuclease H protein At1g65750; EC=3.1.26.4;	SubName: Full=Uncharacterized protein {ECO:0000313|EMBL:CCA66054.1};	FOG: Reverse transcriptase	GO:0046872,metal ion binding; GO:0004523,RNA-DNA hybrid ribonuclease activity; GO:0003676,nucleic acid binding	--
XLOC_015458	NW_018743327.1	1896305	1896529	.	--	uncharacterized protein LOC110713176 [Chenopodium quinoa]	--	SubName: Full=Uncharacterized protein {ECO:0000313|EMBL:PKU59891.1};	--	--	--
XLOC_024561	NW_018744151.1	2471002	2471780	-	K11649 SWI/SNF related-matrix-associated actin-dependent regulator of chromatin subfamily C | (RefSeq) SWI/SNF complex subunit SWI3D-like (A)	SWI/SNF complex subunit SWI3D-like [Chenopodium quinoa]	--	--	--	--	--
XLOC_027752	NW_018744537.1	3117427	3118629	.	K00326 cytochrome-b5 reductase [EC:1.6.2.2] | (RefSeq) NADH-cytochrome b5 reductase-like protein (A)	uncharacterized protein At1g15400-like [Spinacia oleracea]	RecName: Full=MAPK kinase substrate protein At1g80180;	SubName: Full=Uncharacterized protein {ECO:0000313|EMBL:KJB70584.1};	--	GO:0010375,stomatal complex patterning; GO:0005886,plasma membrane	--
XLOC_017946	NW_018743616.1	106566	107690	+	--	--	--	--	--	--	--
XLOC_005622	NW_018742577.1	1777687	1778324	.	--	--	--	--	--	--	--
XLOC_034346	NW_018745080.1	2644666	2645166	.	--	--	--	--	--	--	--
XLOC_024630	NW_018744151.1	2145324	2146190	.	--	hypothetical protein BVRB_8g199600 [Beta vulgaris subsp. vulgaris]	--	SubName: Full=Uncharacterized protein {ECO:0000313|EMBL:KMS96777.1};	--	--	--
XLOC_004012	NW_018742455.1	919650	920228	.	K05658 ATP-binding cassette, subfamily B (MDR/TAP), member 1 [EC:3.6.3.44] | (RefSeq) ABC transporter B family member 4-like (A)	PREDICTED: uncharacterized protein LOC108947389 [Nicotiana tomentosiformis]	RecName: Full=Retrovirus-related Pol polyprotein from transposon RE2; AltName: Full=Retro element 2 {ECO:0000303|PubMed:10689195}; Short=AtRE2 {ECO:0000303|PubMed:10689195}; Includes: RecName: Full=Protease RE2; EC=3.4.23.-; Includes: RecName: Full=Reverse transcriptase RE2; EC=2.7.7.49; Includes: RecName: Full=Endonuclease RE2;	SubName: Full=Putative gag-pol polyprotein, identical {ECO:0000313|EMBL:AAT38758.1};	FOG: Transposon-encoded proteins with TYA, reverse transcriptase, integrase domains in various combinations	GO:0006310,DNA recombination; GO:0004519,endonuclease activity; GO:0015074,DNA integration; GO:0004190,aspartic-type endopeptidase activity; GO:0003676,nucleic acid binding; GO:0003964,RNA-directed DNA polymerase activity; GO:0046872,metal ion binding	--
XLOC_025675	NW_018744301.1	179751	180466	+	--	--	--	--	--	--	--
XLOC_027233	NW_018744502.1	1475201	1482100	-	--	uncharacterized protein LOC110728682 [Chenopodium quinoa]	--	--	--	--	--
XLOC_007984	NW_018742801.1	66334	67235	-	--	--	--	--	--	--	--
XLOC_005416	NW_018742564.1	736764	737321	.	K03006 DNA-directed RNA polymerase II subunit RPB1 [EC:2.7.7.6] | (RefSeq) LOW QUALITY PROTEIN: DNA-directed RNA polymerase II subunit 1-like (A)	Putative gag-pol polyprotein, identical [Solanum demissum]	RecName: Full=Retrovirus-related Pol polyprotein from transposon TNT 1-94; Includes: RecName: Full=Protease; EC=3.4.23.-; Includes: RecName: Full=Reverse transcriptase; EC=2.7.7.49; Includes: RecName: Full=Endonuclease;	SubName: Full=Putative gag-pol polyprotein, identical {ECO:0000313|EMBL:AAT38758.1};	FOG: Transposon-encoded proteins with TYA, reverse transcriptase, integrase domains in various combinations	GO:0004519,endonuclease activity; GO:0015074,DNA integration; GO:0004190,aspartic-type endopeptidase activity; GO:0008270,zinc ion binding; GO:0003676,nucleic acid binding; GO:0003964,RNA-directed DNA polymerase activity	--
XLOC_016247	NW_018743391.1	2154095	2155342	.	--	--	--	--	--	--	--
XLOC_006043	NW_018742630.1	2720695	2721361	+	K03260 translation initiation factor 4G | (RefSeq) eukaryotic translation initiation factor-like (A)	hypothetical protein SOVF_136680 [Spinacia oleracea]	RecName: Full=Hydrophobic protein OSR8;	SubName: Full=Uncharacterized protein {ECO:0000313|EMBL:KNA11270.1};	Stress responsive protein	GO:0016021,integral component of membrane	--
XLOC_036812	NW_018745448.1	3326833	3327167	.	--	protein FAR-RED IMPAIRED RESPONSE 1-like [Chenopodium quinoa]	--	--	--	--	--
XLOC_002872	NW_018742390.1	7789859	7790290	.	K19039 E3 ubiquitin-protein ligase ATL7/58/59 [EC:2.3.2.27] | (RefSeq) RING-H2 finger protein ATL58-like isoform X1 (A)	PREDICTED: uncharacterized RING finger protein C57A7.09-like [Beta vulgaris subsp. vulgaris]	RecName: Full=E3 ubiquitin-protein ligase ATL23; EC=2.3.2.27 {ECO:0000269|PubMed:15644464, ECO:0000269|PubMed:16339806}; AltName: Full=RING-H2 finger protein ATL23; AltName: Full=RING-type E3 ubiquitin transferase ATL23 {ECO:0000305};	SubName: Full=Uncharacterized protein {ECO:0000313|EnsemblPlants:Bo2g012910.1};	FOG: Predicted E3 ubiquitin ligase	GO:0061630,ubiquitin protein ligase activity; GO:0016021,integral component of membrane; GO:0016567,protein ubiquitination; GO:0043161,proteasome-mediated ubiquitin-dependent protein catabolic process; GO:0046872,metal ion binding; GO:0004842,ubiquitin-protein transferase activity	--
XLOC_002038	NW_018742292.1	627706	630358	-	--	--	--	--	--	--	--
XLOC_030531	NW_018744745.1	819240	822639	-	K14835 25S rRNA (cytosine2870-C5)-methyltransferase [EC:2.1.1.310] | (RefSeq) 25S rRNA (cytosine-C(5))-methyltransferase nop2-like (A)	uncharacterized protein LOC110709005 isoform X1 [Chenopodium quinoa]	--	SubName: Full=Uncharacterized protein {ECO:0000313|EMBL:KNA02738.1}; Flags: Fragment;	--	--	--
XLOC_038938	NW_018745684.1	1069953	1071001	+	--	hypothetical protein BVRB_6g134850 isoform A [Beta vulgaris subsp. vulgaris]	RecName: Full=EPIDERMAL PATTERNING FACTOR-like protein 1 {ECO:0000303|PubMed:19435754}; Short=EPF-like protein 1; Contains: RecName: Full=MEPFL1 {ECO:0000305}; Flags: Precursor;	SubName: Full=Uncharacterized protein {ECO:0000313|EMBL:KNA19193.1}; Flags: Fragment;	--	GO:0010374,stomatal complex development; GO:0005576,extracellular region; GO:0010052,guard cell differentiation	--
XLOC_002535	NW_018742345.1	7563309	7563843	-	--	--	--	--	--	--	--
XLOC_000980	NW_018742205.1	5988855	5989349	+	--	--	--	--	--	--	--
XLOC_009213	NW_018742899.1	2456783	2457158	.	K01051 pectinesterase [EC:3.1.1.11] | (RefSeq) probable pectinesterase 53 (A)	probable pectinesterase 68 [Chenopodium quinoa]	RecName: Full=Probable pectinesterase 68; Short=PE 68; EC=3.1.1.11; AltName: Full=Pectin methylesterase 68; Short=AtPME68; Flags: Precursor;	RecName: Full=Pectinesterase {ECO:0000256|RuleBase:RU000589}; EC=3.1.1.11 {ECO:0000256|RuleBase:RU000589};	--	GO:0042545,cell wall modification; GO:0005618,cell wall; GO:0030599,pectinesterase activity; GO:0005576,extracellular region; GO:0045330,aspartyl esterase activity; GO:0045490,pectin catabolic process	--
XLOC_029365	NW_018744633.1	4212207	4212577	.	--	uncharacterized protein LOC110729970 [Chenopodium quinoa]	--	SubName: Full=Uncharacterized protein {ECO:0000313|EMBL:KNA15429.1}; Flags: Fragment;	--	--	--
XLOC_018118	NW_018743623.1	977540	978151	-	K05765 cofilin | (RefSeq) actin-depolymerizing factor 6 (A)	actin-depolymerizing factor 6 [Capsella rubella]	RecName: Full=Actin-depolymerizing factor 6; Short=ADF-6; Short=AtADF6;	SubName: Full=Uncharacterized protein {ECO:0000313|EMBL:EOA28085.1};	Actin depolymerizing factor	GO:0003779,actin binding; GO:0005737,cytoplasm; GO:0030042,actin filament depolymerization; GO:0015629,actin cytoskeleton	Cofilin/tropomyosin-type actin-binding protein
XLOC_038286	NW_018745566.1	669895	670319	.	--	--	--	--	--	--	--
XLOC_002332	NW_018742329.1	6272607	6273132	-	--	--	--	--	--	--	--
XLOC_006510	NW_018742684.1	1586925	1588109	+	--	hypothetical protein SOVF_118660 [Spinacia oleracea]	--	SubName: Full=Uncharacterized protein {ECO:0000313|EMBL:KNA13221.1};	--	--	--
XLOC_037664	NW_018745482.1	563062	566259	+	K19984 exocyst complex component 5 | (RefSeq) uncharacterized protein LOC113272286 (A)	zinc finger BED domain-containing protein RICESLEEPER 2-like [Spinacia oleracea]	RecName: Full=Zinc finger BED domain-containing protein RICESLEEPER 2; AltName: Full=Transposase-like protein RICESLEEPER 2;	SubName: Full=Uncharacterized protein {ECO:0000313|EMBL:CAN80126.1};	Tam3-transposase (Ac family)	GO:0003700,DNA-binding transcription factor activity; GO:0005634,nucleus; GO:0009791,post-embryonic development; GO:0006357,regulation of transcription by RNA polymerase II; GO:0000977,RNA polymerase II regulatory region sequence-specific DNA binding; GO:0046983,protein dimerization activity; GO:0046872,metal ion binding; GO:0006351,transcription, DNA-templated	--
XLOC_017390	NW_018743574.1	6611994	6615250	+	--	uncharacterized protein LOC110701741 isoform X2 [Chenopodium quinoa]	--	SubName: Full=Uncharacterized protein {ECO:0000313|EMBL:KNA06093.1};	--	--	--
XLOC_022267	NW_018743979.1	3115671	3117353	+	--	--	--	--	--	--	--
XLOC_011243	NW_018743033.1	103941	104369	.	--	--	--	--	--	--	--
XLOC_039508	NW_018745684.1	4797482	4797904	.	K13466 EIX receptor 1/2 | (RefSeq) LRR receptor-like serine/threonine-protein kinase GSO1 (A)	LRR receptor-like serine/threonine-protein kinase GSO1 [Chenopodium quinoa]	RecName: Full=Receptor-like protein EIX2 {ECO:0000305}; AltName: Full=EIX receptor 2 {ECO:0000312|EMBL:AAR28378.1}; Flags: Precursor;	SubName: Full=Uncharacterized protein {ECO:0000313|EMBL:KNA02687.1};	--	GO:0050832,defense response to fungus; GO:0016021,integral component of membrane; GO:0005886,plasma membrane	--
XLOC_027313	NW_018744502.1	1441388	1441734	.	--	--	--	--	--	--	--
XLOC_018562	NW_018743691.1	4399591	4400782	.	--	--	--	--	--	--	--
XLOC_027816	NW_018744560.1	155380	156136	.	K19525 vacuolar protein sorting-associated protein 13A/C | (RefSeq) uncharacterized protein LOC110098611 (A)	uncharacterized protein LOC110737482 [Chenopodium quinoa]	RecName: Full=Uncharacterized mitochondrial protein AtMg00860; AltName: Full=ORF158;	SubName: Full=Uncharacterized protein {ECO:0000313|EMBL:ACY01928.1};	FOG: Transposon-encoded proteins with TYA, reverse transcriptase, integrase domains in various combinations	GO:0005739,mitochondrion	--
XLOC_019700	NW_018743850.1	5591321	5592298	+	--	--	--	--	--	--	--
XLOC_016181	NW_018743391.1	818868	821884	-	--	hypothetical protein SOVF_162230 [Spinacia oleracea]	--	SubName: Full=Uncharacterized protein {ECO:0000313|EMBL:KNA08479.1};	--	--	--
XLOC_014445	NW_018743292.1	84603	85642	+	K01056 peptidyl-tRNA hydrolase, PTH1 family [EC:3.1.1.29] | (RefSeq) peptidyl-tRNA hydrolase, mitochondrial isoform X1 (A)	peptidyl-tRNA hydrolase, mitochondrial isoform X2 [Chenopodium quinoa]	RecName: Full=Peptidyl-tRNA hydrolase, mitochondrial; EC=3.1.1.29; AltName: Full=M-PTH; AltName: Full=Mitochondrial CRS2-like protein; AltName: Full=Mitochondrial RNA splicing factor; Flags: Precursor;	SubName: Full=Uncharacterized protein {ECO:0000313|EMBL:KNA22701.1};	--	GO:0005739,mitochondrion; GO:0004045,aminoacyl-tRNA hydrolase activity; GO:0008380,RNA splicing; GO:0030529,NA; GO:0006397,mRNA processing	--
XLOC_036715	NW_018745448.1	9714495	9715856	+	--	hypothetical protein SOVF_023660 isoform A [Spinacia oleracea]	RecName: Full=Putative FBD-associated F-box protein At1g55030;	SubName: Full=Uncharacterized protein {ECO:0000313|EMBL:KNA23557.1};	--	--	--
XLOC_020170	NW_018743880.1	1944859	1945406	.	--	--	--	--	--	--	--
XLOC_013216	NW_018743199.1	3099621	3100967	.	--	PREDICTED: wound-induced protein 1-like, partial [Nicotiana attenuata]	RecName: Full=Senescence associated gene 20 {ECO:0000303|PubMed:10444084}; AltName: Full=Protein WOUND-INDUCED 12 {ECO:0000303|PubMed:12857840}; Short=AtWI-12 {ECO:0000303|PubMed:12857840};	SubName: Full=Uncharacterized protein {ECO:0000313|EMBL:EXC24684.1};	--	GO:0010150,leaf senescence; GO:0007568,aging; GO:0009620,response to fungus; GO:0009624,response to nematode; GO:0010193,response to ozone; GO:0002238,response to molecule of fungal origin	--
XLOC_002178	NW_018742309.1	5787689	5788218	.	--	--	--	--	--	--	--
XLOC_033785	NW_018745024.1	11827850	11829933	-	--	--	--	--	--	--	--
XLOC_022316	NW_018743979.1	3274497	3275023	.	--	transcription factor bHLH148-like [Chenopodium quinoa]	--	SubName: Full=Uncharacterized protein {ECO:0000313|EMBL:KNA19740.1};	--	GO:0046983,protein dimerization activity	--
XLOC_020349	NW_018743894.1	3579897	3580942	.	--	--	--	--	--	--	--
XLOC_036365	NW_018745407.1	568601	569034	.	K10393 kinesin family member 2/24 | (RefSeq) kinesin-13A-like (A)	uncharacterized protein LOC110728323 [Chenopodium quinoa]	--	SubName: Full=Uncharacterized protein {ECO:0000313|EMBL:CCA65981.1};	FOG: Reverse transcriptase	--	zinc-binding in reverse transcriptase
XLOC_026963	NW_018744469.1	2373375	2373743	.	--	uncharacterized protein LOC110697610 [Chenopodium quinoa]	--	--	--	--	--
XLOC_022355	NW_018743987.1	532041	533048	-	--	--	--	--	--	--	--
XLOC_007078	NW_018742733.1	1236648	1237237	+	--	--	--	--	--	--	--
XLOC_022231	NW_018743977.1	1177300	1177559	.	--	--	--	--	--	--	--
XLOC_038201	NW_018745540.1	1101988	1103155	.	K14649 transcription initiation factor TFIID subunit 8 | (RefSeq) uncharacterized protein LOC110725976 (A)	uncharacterized protein LOC110725976 [Chenopodium quinoa]	RecName: Full=Transcription initiation factor TFIID subunit 8; AltName: Full=TBP-associated factor 8; Short=AtTAF8;	SubName: Full=Uncharacterized protein {ECO:0000313|EMBL:KNA19143.1};	Predicted bromodomain transcription factor	GO:0006355,regulation of transcription, DNA-templated; GO:0005634,nucleus; GO:0046982,protein heterodimerization activity; GO:0006351,transcription, DNA-templated	--
XLOC_037309	NW_018745454.1	5478818	5480109	-	--	PREDICTED: uncharacterized protein LOC104897042 [Beta vulgaris subsp. vulgaris]	--	SubName: Full=Uncharacterized protein {ECO:0000313|EMBL:KDO36252.1};	--	GO:0016021,integral component of membrane	Probable lipid transfer
XLOC_011089	NW_018743021.1	3487075	3487769	-	K04123 ent-kaurenoic acid monooxygenase [EC:1.14.14.107] | (RefSeq) beta-amyrin 11-oxidase-like (A)	ent-kaurenoic acid oxidase 2-like isoform X1 [Chenopodium quinoa]	RecName: Full=Ent-kaurenoic acid oxidase 1; Short=AtKAO1; EC=1.14.13.79; AltName: Full=Cytochrome P450 88A3;	SubName: Full=Uncharacterized protein {ECO:0000313|EMBL:ERP54619.1};	Cytochrome P450 CYP4/CYP19/CYP26 subfamilies	GO:0016125,sterol metabolic process; GO:0005783,endoplasmic reticulum; GO:0020037,heme binding; GO:0016132,brassinosteroid biosynthetic process; GO:0016021,integral component of membrane; GO:0010268,brassinosteroid homeostasis; GO:0009686,gibberellin biosynthetic process; GO:0005789,endoplasmic reticulum membrane; GO:0051777,ent-kaurenoate oxidase activity; GO:0005506,iron ion binding; GO:0007275…	--
XLOC_030994	NW_018744835.1	173803	174517	.	--	--	--	--	--	--	--
XLOC_037954	NW_018745523.1	782915	783692	.	--	hypothetical protein SOVF_191020 [Spinacia oleracea]	--	SubName: Full=Uncharacterized protein {ECO:0000313|EMBL:KNA05366.1};	--	--	--
XLOC_011087	NW_018743021.1	3433157	3436689	-	--	pentatricopeptide repeat-containing protein At5g47360-like [Chenopodium quinoa]	--	SubName: Full=Uncharacterized protein {ECO:0000313|EMBL:KNA16182.1};	--	--	--
XLOC_001283	NW_018742205.1	3465048	3465794	.	K09422 transcription factor MYB, plant | (RefSeq) transcription factor MYB61-like (A)	hypothetical protein TSUD_35770 [Trifolium subterraneum]	RecName: Full=Transcription factor MYB61 {ECO:0000305}; AltName: Full=Myb-related protein 61 {ECO:0000305}; Short=AtMYB61 {ECO:0000303|PubMed:16005292};	SubName: Full=MYB transcription factor MYB64 {ECO:0000313|EMBL:ABH02909.1}; Flags: Fragment;	Transcription factor, Myb superfamily	GO:0009733,response to auxin; GO:0043565,sequence-specific DNA binding; GO:0010214,seed coat development; GO:0010089,xylem development; GO:0044212,transcription regulatory region DNA binding; GO:0003700,DNA-binding transcription factor activity; GO:0005634,nucleus; GO:0030154,cell differentiation; GO:0048364,root development; GO:0010087,phloem or xylem histogenesis; GO:0006357,regulation of trans…	--
XLOC_012823	NW_018743197.1	603978	605487	+	--	--	--	--	--	--	--
XLOC_015673	NW_018743331.1	7974827	7978925	-	--	--	--	--	--	--	--
XLOC_006617	NW_018742684.1	1172194	1173160	-	--	--	--	--	--	--	--
XLOC_016461	NW_018743444.1	790423	792976	-	K06174 ATP-binding cassette, sub-family E, member 1 | (RefSeq) ABC transporter E family member 2 (A)	ABC transporter E family member 2 [Carica papaya]	RecName: Full=ABC transporter E family member 1; Short=ABC transporter ABCE.1; Short=AtABCE1; AltName: Full=RNase L inhibitor-like protein 1; Short=AtRLI1; Short=AthaRLI1;	SubName: Full=ABC transporter E family member 2-like isoform X1 {ECO:0000313|RefSeq:XP_008783221.1};	--	GO:0006415,translational termination; GO:0051539,4 iron, 4 sulfur cluster binding; GO:0005215,transporter activity; GO:0016020,membrane; GO:0000054,ribosomal subunit export from nucleus; GO:0005622,intracellular; GO:0016887,ATPase activity; GO:0005506,iron ion binding; GO:0006413,translational initiation; GO:0043024,ribosomal small subunit binding; GO:0005524,ATP binding	--
XLOC_004485	NW_018742483.1	1400664	1401355	-	--	--	--	--	--	--	--
XLOC_028352	NW_018744603.1	589511	589802	.	--	vesicle-associated protein 4-1-like [Chenopodium quinoa]	RecName: Full=Vesicle-associated protein 4-2; AltName: Full=Plant VAP homolog 4-2; Short=AtPVA42; AltName: Full=VAMP-associated protein 4-2;	SubName: Full=Uncharacterized protein {ECO:0000313|EMBL:KNA18699.1};	VAMP-associated protein involved in inositol metabolism	GO:0005789,endoplasmic reticulum membrane	--
XLOC_006706	NW_018742684.1	208867	209174	.	K21437 ankyrin repeat domain-containing protein 13 | (RefSeq) uncharacterized protein LOC112523844 (A)	zinc finger BED domain-containing protein RICESLEEPER 1-like [Chenopodium quinoa]	RecName: Full=Zinc finger BED domain-containing protein RICESLEEPER 3; AltName: Full=Transposase-like protein RICESLEEPER 3;	SubName: Full=Uncharacterized protein {ECO:0000313|EMBL:KMS64884.1}; Flags: Fragment;	Tam3-transposase (Ac family)	GO:0003700,DNA-binding transcription factor activity; GO:0005634,nucleus; GO:0009791,post-embryonic development; GO:0006357,regulation of transcription by RNA polymerase II; GO:0000977,RNA polymerase II regulatory region sequence-specific DNA binding; GO:0046983,protein dimerization activity; GO:0046872,metal ion binding; GO:0006351,transcription, DNA-templated	--
XLOC_001507	NW_018742241.1	579663	580770	.	--	hypothetical protein BVRB_8g181220 [Beta vulgaris subsp. vulgaris]	--	SubName: Full=Uncharacterized protein {ECO:0000313|EMBL:EOY27941.1};	--	--	--
XLOC_005341	NW_018742556.1	502519	503383	.	--	uncharacterized protein LOC110702001 [Chenopodium quinoa]	--	SubName: Full=Mediator of RNA polymerase II transcription subunit 18, putative {ECO:0000313|EMBL:EOY00903.1};	--	GO:0016021,integral component of membrane	--
XLOC_030817	NW_018744821.1	2610420	2610695	.	--	--	--	--	--	--	--
XLOC_016741	NW_018743510.1	5338173	5339803	+	--	--	--	--	--	--	--
XLOC_006246	NW_018742651.1	585418	590761	-	K19984 exocyst complex component 5 | (RefSeq) uncharacterized protein LOC113272286 (A)	PREDICTED: zinc finger BED domain-containing protein RICESLEEPER 2-like [Gossypium hirsutum]	RecName: Full=Zinc finger BED domain-containing protein RICESLEEPER 1; AltName: Full=Transposase-like protein RICESLEEPER 1;	SubName: Full=zinc finger BED domain-containing protein RICESLEEPER 2-like {ECO:0000313|RefSeq:XP_016740977.1, ECO:0000313|RefSeq:XP_016742294.1};	Tam3-transposase (Ac family)	GO:0003700,DNA-binding transcription factor activity; GO:0005634,nucleus; GO:0009791,post-embryonic development; GO:0006357,regulation of transcription by RNA polymerase II; GO:0000977,RNA polymerase II regulatory region sequence-specific DNA binding; GO:0046983,protein dimerization activity; GO:0046872,metal ion binding; GO:0006351,transcription, DNA-templated	hAT family C-terminal dimerisation region
XLOC_007420	NW_018742738.1	4162177	4164316	-	K19984 exocyst complex component 5 | (RefSeq) uncharacterized protein LOC113272286 (A)	zinc finger BED domain-containing protein RICESLEEPER 2-like [Chenopodium quinoa]	RecName: Full=Zinc finger BED domain-containing protein RICESLEEPER 2; AltName: Full=Transposase-like protein RICESLEEPER 2;	SubName: Full=zinc finger BED domain-containing protein RICESLEEPER 2-like {ECO:0000313|RefSeq:XP_016740977.1, ECO:0000313|RefSeq:XP_016742294.1};	Tam3-transposase (Ac family)	GO:0003700,DNA-binding transcription factor activity; GO:0005634,nucleus; GO:0009791,post-embryonic development; GO:0006357,regulation of transcription by RNA polymerase II; GO:0000977,RNA polymerase II regulatory region sequence-specific DNA binding; GO:0046983,protein dimerization activity; GO:0046872,metal ion binding; GO:0006351,transcription, DNA-templated	hAT family C-terminal dimerisation region
XLOC_002995	NW_018742393.1	967618	969247	-	--	hypothetical protein SOVF_088820 [Spinacia oleracea]	--	SubName: Full=Uncharacterized protein {ECO:0000313|EMBL:KNA16485.1};	--	--	--
XLOC_038147	NW_018745538.1	93	630	.	K22378 E3 ubiquitin-protein ligase RNF181 [EC:2.3.2.27] | (RefSeq) RING-H2 finger protein ATL73-like (A)	RING finger protein 1 [Suaeda glauca]	RecName: Full=Probable E3 ubiquitin-protein ligase RHB1A {ECO:0000305}; EC=2.3.2.27; AltName: Full=RING-H2 finger B1a {ECO:0000303|PubMed:9781696}; AltName: Full=RING-H2 zinc finger protein RHB1a {ECO:0000305}; AltName: Full=RING-type E3 ubiquitin transferase RHB1A {ECO:0000305};	SubName: Full=RING finger protein 1 {ECO:0000313|EMBL:AHB08881.1};	FOG: Predicted E3 ubiquitin ligase	GO:0016567,protein ubiquitination; GO:0016740,transferase activity; GO:0046872,metal ion binding	--
XLOC_032809	NW_018744996.1	398827	399938	.	--	--	--	--	--	--	Immunity protein 57
XLOC_034341	NW_018745080.1	2272910	2273615	.	--	--	--	--	--	--	--
XLOC_022314	NW_018743979.1	1921263	1922258	.	--	--	--	--	--	--	--
XLOC_005411	NW_018742564.1	67493	67971	.	K01179 endoglucanase [EC:3.2.1.4] | (RefSeq) endoglucanase 8-like (A)	uncharacterized protein LOC110707488 [Chenopodium quinoa]	--	SubName: Full=Uncharacterized protein {ECO:0000313|EMBL:CCA66008.1};	FOG: Reverse transcriptase	GO:0008270,zinc ion binding; GO:0003676,nucleic acid binding	--
XLOC_032160	NW_018744955.1	542121	544471	-	K17767 AH receptor-interacting protein | (RefSeq) peptidyl-prolyl cis-trans isomerase FKBP62-like (A)	70 kDa peptidyl-prolyl isomerase-like [Chenopodium quinoa]	RecName: Full=70 kDa peptidyl-prolyl isomerase; EC=5.2.1.8; AltName: Full=Peptidyl-prolyl cis-trans isomerase; Short=PPIase; AltName: Full=Rotamase;	SubName: Full=Uncharacterized protein {ECO:0000313|EMBL:KMS96588.1};	FKBP-type peptidyl-prolyl cis-trans isomerase	GO:0005516,calmodulin binding; GO:0003755,peptidyl-prolyl cis-trans isomerase activity	--
XLOC_009982	NW_018742951.1	4248882	4249965	+	--	hypothetical protein SOVF_014360 [Spinacia oleracea]	--	SubName: Full=Uncharacterized protein {ECO:0000313|EMBL:KNA24567.1};	--	--	--
XLOC_000808	NW_018742204.1	19310512	19311668	.	--	hypothetical protein SOVF_215340 [Spinacia oleracea]	RecName: Full=Protein EGG APPARATUS-1; AltName: Full=ZmEA1;	SubName: Full=Uncharacterized protein {ECO:0000313|EMBL:KNA02791.1};	--	GO:0016021,integral component of membrane; GO:0007338,single fertilization	--
XLOC_012815	NW_018743196.1	2300976	2301903	.	--	--	--	--	--	--	--
XLOC_006144	NW_018742630.1	1822656	1823637	.	--	--	--	--	--	--	--
XLOC_030252	NW_018744718.1	1864828	1866766	+	--	--	--	--	--	--	--
XLOC_037389	NW_018745454.1	6642578	6643404	.	--	putative glycine-rich cell wall structural protein 1 [Chenopodium quinoa]	--	--	--	--	--
XLOC_013758	NW_018743212.1	2266332	2266652	.	--	--	--	--	--	--	--
XLOC_003755	NW_018742418.1	5191519	5191923	.	--	--	--	--	--	--	--
XLOC_023124	NW_018744072.1	1700381	1700725	.	--	--	--	--	--	--	Family of unknown function (DUF5549)
XLOC_004405	NW_018742461.1	1094990	1096001	.	--	--	--	--	--	--	--
XLOC_025142	NW_018744239.1	5741999	5742700	.	--	--	--	--	--	--	--
XLOC_002450	NW_018742334.1	237964	238988	.	--	--	--	--	--	--	--
XLOC_035832	NW_018745311.1	2564467	2565605	+	K01087 trehalose 6-phosphate phosphatase [EC:3.1.3.12] | (RefSeq) trehalose-phosphate phosphatase A-like (A)	PREDICTED: nephrocystin-3 [Daucus carota subsp. sativus]	RecName: Full=Protein KINESIN LIGHT CHAIN-RELATED 1 {ECO:0000303|PubMed:23204523};	SubName: Full=Uncharacterized protein {ECO:0000313|EMBL:KZN05670.1};	Kinesin light chain	GO:0005737,cytoplasm; GO:0005874,microtubule; GO:0005886,plasma membrane	--
XLOC_029157	NW_018744633.1	2289720	2290653	-	--	--	--	--	--	--	--
XLOC_038204	NW_018745540.1	2071548	2072360	.	--	--	--	--	--	--	--
XLOC_013211	NW_018743199.1	2292113	2292547	.	K06943 nucleolar GTP-binding protein | (RefSeq) uncharacterized protein LOC108835530 (A)	uncharacterized protein LOC110716111 [Chenopodium quinoa]	RecName: Full=Uncharacterized mitochondrial protein AtMg00310; AltName: Full=ORF154;	SubName: Full=Uncharacterized protein {ECO:0000313|EMBL:CCA66044.1};	FOG: Reverse transcriptase	GO:0005739,mitochondrion	--
XLOC_018790	NW_018743697.1	1775156	1775843	-	--	--	--	--	--	--	--
XLOC_002278	NW_018742329.1	94921	95956	-	--	--	--	--	--	--	--
XLOC_005414	NW_018742564.1	177295	177516	.	--	uncharacterized protein LOC110727121 isoform X2 [Chenopodium quinoa]	--	--	--	--	--
XLOC_030483	NW_018744735.1	12188	13369	.	--	uncharacterized protein LOC110716778 [Chenopodium quinoa]	--	SubName: Full=Uncharacterized protein {ECO:0000313|EMBL:KZM90850.1};	--	--	--
XLOC_008875	NW_018742879.1	1558097	1559872	.	--	uncharacterized protein LOC110728660 [Chenopodium quinoa]	--	--	--	--	--
XLOC_001463	NW_018742241.1	229083	244169	+	--	uncharacterized protein LOC110684847 isoform X1 [Chenopodium quinoa]	--	--	--	--	--
XLOC_018878	NW_018743697.1	3980736	3983718	-	--	probable myosin light chain kinase DDB_G0279831 [Chenopodium quinoa]	--	SubName: Full=Uncharacterized protein {ECO:0000313|EMBL:KNA21171.1};	--	--	--
XLOC_039194	NW_018745684.1	10437506	10439335	+	--	nucleotide-sugar uncharacterized transporter 2-like [Chenopodium quinoa]	--	SubName: Full=uncharacterized membrane protein At1g06890-like {ECO:0000313|RefSeq:XP_010246387.1};	--	GO:0016021,integral component of membrane	--
XLOC_011360	NW_018743050.1	2654692	2672431	+	--	uncharacterized protein LOC110691595 isoform X7 [Chenopodium quinoa]	--	--	--	--	--
XLOC_031694	NW_018744878.1	1189614	1190043	-	--	--	--	--	--	--	--
XLOC_004493	NW_018742483.1	332528	332753	.	--	plectin-like [Chenopodium quinoa]	--	--	--	--	--
XLOC_022311	NW_018743979.1	1253248	1253501	.	--	--	--	--	--	--	--
XLOC_020301	NW_018743894.1	4154929	4156875	+	--	--	--	--	--	--	--
XLOC_013116	NW_018743199.1	2834566	2835781	-	--	--	--	--	--	--	--
XLOC_009902	NW_018742924.1	793128	793410	.	--	--	--	--	--	--	--
XLOC_007318	NW_018742733.1	3292948	3293204	.	--	--	--	--	--	--	--
XLOC_016744	NW_018743510.1	149734	151834	-	--	--	--	--	--	--	--
XLOC_021705	NW_018743946.1	2009016	2010597	.	--	--	--	--	--	--	--
XLOC_006287	NW_018742651.1	4411011	4413047	-	K01251 adenosylhomocysteinase [EC:3.3.1.1] | (RefSeq) adenosylhomocysteinase (A)	uncharacterized protein LOC110713726 [Chenopodium quinoa]	--	SubName: Full=Putative ovule protein {ECO:0000313|EMBL:JAP22011.1};	FOG: Transposon-encoded proteins with TYA, reverse transcriptase, integrase domains in various combinations	GO:0003676,nucleic acid binding	--
XLOC_024779	NW_018744167.1	2180274	2180515	.	--	--	--	--	--	--	--
XLOC_005344	NW_018742556.1	670902	671580	.	--	hypothetical protein SOVF_171160 [Spinacia oleracea]	RecName: Full=Probable non-specific lipid-transfer protein AKCS9; Short=LTP; Flags: Precursor;	SubName: Full=Uncharacterized protein {ECO:0000313|EMBL:KNA07508.1};	--	GO:0008289,lipid binding; GO:0006869,lipid transport	Probable lipid transfer
XLOC_015918	NW_018743389.1	204790	206204	+	K13128 zinc finger CCHC domain-containing protein 8 | (RefSeq) uncharacterized protein LOC110685974 (A)	uncharacterized protein LOC110685974 [Chenopodium quinoa]	--	SubName: Full=Uncharacterized protein {ECO:0000313|EMBL:KNA09159.1};	--	GO:0008270,zinc ion binding; GO:0003676,nucleic acid binding	--
XLOC_023632	NW_018744092.1	3866749	3867033	.	--	--	--	--	--	--	--
XLOC_003746	NW_018742418.1	3802697	3803342	.	--	--	--	--	--	--	--
XLOC_013241	NW_018743204.1	401530	425240	+	K01772 protoporphyrin/coproporphyrin ferrochelatase [EC:4.99.1.1 4.99.1.9] | (RefSeq) LOW QUALITY PROTEIN: ferrochelatase-1, chloroplastic-like (A)	protein MAINTENANCE OF MERISTEMS-like [Chenopodium quinoa]	RecName: Full=Protein MAIN-LIKE 1 {ECO:0000303|PubMed:24635680};	SubName: Full=Uncharacterized protein {ECO:0000313|EMBL:OMO67845.1};	--	GO:0008483,transaminase activity; GO:0016458,gene silencing; GO:0005634,nucleus; GO:0010082,regulation of root meristem growth; GO:0010073,meristem maintenance	--
XLOC_005033	NW_018742523.1	2694427	2694915	.	--	--	--	--	--	--	--
XLOC_039515	NW_018745684.1	6027027	6027407	.	--	hypothetical protein LR48_Vigan03g146600 [Vigna angularis]	--	SubName: Full=Uncharacterized protein {ECO:0000313|EMBL:KOM38084.1};	--	GO:0016021,integral component of membrane	--
XLOC_027841	NW_018744577.1	26223	29166	-	K15133 mediator of RNA polymerase II transcription subunit 17 | (RefSeq) mediator of RNA polymerase II transcription subunit 17-like (A)	mediator of RNA polymerase II transcription subunit 17-like [Chenopodium quinoa]	--	SubName: Full=Uncharacterized protein {ECO:0000313|EMBL:KNA19964.1};	--	GO:0001104,NA; GO:0016592,mediator complex	--
XLOC_015576	NW_018743331.1	91786	93050	-	--	uncharacterized protein LOC110720177 [Chenopodium quinoa]	--	SubName: Full=Uncharacterized protein {ECO:0000313|EMBL:KMS97991.1};	--	--	--
XLOC_020734	NW_018743919.1	2137119	2138533	.	--	protein ENHANCED PSEUDOMONAS SUSCEPTIBILTY 1-like [Chenopodium quinoa]	--	--	--	--	--
XLOC_021605	NW_018743942.1	2554023	2554542	.	--	--	--	--	--	--	--
XLOC_010859	NW_018743014.1	1661936	1662196	.	--	--	--	--	--	--	--
XLOC_017897	NW_018743593.1	1615131	1615716	.	--	--	--	--	--	--	--
XLOC_029939	NW_018744693.1	3244092	3245719	-	--	--	--	--	--	--	--
XLOC_003249	NW_018742415.1	1492076	1493142	.	--	--	--	--	--	--	--
XLOC_008931	NW_018742881.1	1176116	1181572	+	K12874 intron-binding protein aquarius | (RefSeq) LOW QUALITY PROTEIN: intron-binding protein aquarius-like (A)	uncharacterized protein LOC110691367 [Chenopodium quinoa]	RecName: Full=Putative ribonuclease H protein At1g65750; EC=3.1.26.4;	SubName: Full=Uncharacterized protein {ECO:0000313|EMBL:CCA66040.1};	FOG: Reverse transcriptase	GO:0046872,metal ion binding; GO:0004523,RNA-DNA hybrid ribonuclease activity; GO:0003676,nucleic acid binding	--
XLOC_032031	NW_018744910.1	21046	22228	+	--	uncharacterized protein LOC110706159 [Chenopodium quinoa]	--	SubName: Full=Uncharacterized protein {ECO:0000313|EMBL:PKI56241.1};	--	--	--
XLOC_010857	NW_018743014.1	807317	808249	.	--	uncharacterized protein LOC110715464 [Chenopodium quinoa]	--	SubName: Full=Uncharacterized protein {ECO:0000313|EMBL:KNA12996.1};	--	--	--
XLOC_019479	NW_018743814.1	237495	237890	.	--	--	--	--	--	--	--
XLOC_011371	NW_018743050.1	3237790	3239738	+	K11294 nucleolin | (RefSeq) nucleolin-like (A)	uncharacterized protein LOC110704671 [Chenopodium quinoa]	--	SubName: Full=Uncharacterized protein {ECO:0000313|EMBL:KNA19102.1};	--	GO:0008270,zinc ion binding; GO:0003676,nucleic acid binding	--
XLOC_011740	NW_018743066.1	517702	518876	.	--	hypothetical protein BVRB_8g184670 [Beta vulgaris subsp. vulgaris]	--	SubName: Full=Uncharacterized protein {ECO:0000313|EMBL:KNA11393.1};	--	--	--
XLOC_004502	NW_018742483.1	2058406	2059268	.	--	--	--	--	--	--	--
XLOC_010332	NW_018742966.1	1161158	1161367	.	--	--	--	--	--	--	--
XLOC_007891	NW_018742770.1	3015934	3016462	.	--	--	--	--	--	--	--
XLOC_008659	NW_018742864.1	1214247	1214882	.	--	--	--	--	--	--	--
XLOC_005136	NW_018742541.1	232945	234788	.	--	LOW QUALITY PROTEIN: uncharacterized protein LOC110720186 [Chenopodium quinoa]	--	SubName: Full=uncharacterized protein LOC109017787 {ECO:0000313|RefSeq:XP_018855520.1};	FOG: Transposon-encoded proteins with TYA, reverse transcriptase, integrase domains in various combinations	--	--
XLOC_037579	NW_018745461.1	1391214	1392039	.	--	hypothetical protein SOVF_015660 [Spinacia oleracea]	--	SubName: Full=Uncharacterized protein {ECO:0000313|EMBL:KNA24463.1};	--	--	--
XLOC_001140	NW_018742205.1	2483009	2484725	-	--	--	--	--	--	--	--
XLOC_028110	NW_018744591.1	464646	465784	-	--	--	--	--	--	--	--
XLOC_029690	NW_018744662.1	2073468	2078197	.	K12874 intron-binding protein aquarius | (RefSeq) LOW QUALITY PROTEIN: intron-binding protein aquarius-like (A)	uncharacterized protein LOC110693390 [Chenopodium quinoa]	RecName: Full=Putative ribonuclease H protein At1g65750; EC=3.1.26.4;	SubName: Full=Uncharacterized protein {ECO:0000313|EMBL:CCA66009.1};	FOG: Reverse transcriptase	GO:0046872,metal ion binding; GO:0004523,RNA-DNA hybrid ribonuclease activity; GO:0003676,nucleic acid binding	--
XLOC_024343	NW_018744143.1	469308	471005	.	K03046 DNA-directed RNA polymerase subunit beta' [EC:2.7.7.6] | (RefSeq) uncharacterized protein LOC108945874 (A)	hypothetical protein DCAR_001146 [Daucus carota subsp. sativus]	--	SubName: Full=Uncharacterized protein {ECO:0000313|EMBL:KZN08616.1};	--	--	--
XLOC_026515	NW_018744369.1	785252	786468	-	--	NDR1/HIN1-like protein 6 [Spinacia oleracea]	--	SubName: Full=Uncharacterized protein {ECO:0000313|EMBL:KNA03836.1}; Flags: Fragment;	--	GO:0016021,integral component of membrane	--
XLOC_034945	NW_018745177.1	3618821	3619265	.	--	--	--	--	--	--	--
XLOC_007418	NW_018742738.1	3895113	3896477	-	--	--	--	--	--	--	--
XLOC_001822	NW_018742244.1	154811	155301	.	--	uncharacterized protein LOC110740148 [Chenopodium quinoa]	--	--	--	--	--
XLOC_037577	NW_018745461.1	1195052	1196859	.	--	zinc finger MYM-type protein 1-like [Chenopodium quinoa]	--	--	--	--	--
XLOC_028295	NW_018744593.1	6267630	6268015	.	--	--	--	--	--	--	--
XLOC_021532	NW_018743937.1	1604647	1604977	.	--	uncharacterized protein LOC110694144 [Chenopodium quinoa]	--	--	--	--	--
XLOC_036220	NW_018745395.1	117869	122114	+	--	--	--	--	--	--	--
XLOC_018922	NW_018743697.1	171328	171911	.	--	--	--	--	--	--	--
XLOC_010329	NW_018742966.1	935585	935804	.	K20718 LRR receptor-like serine/threonine-protein kinase ERECTA [EC:2.7.11.1] | (RefSeq) ERb-1; hypothetical protein (A)	PREDICTED: receptor-like protein 12 [Daucus carota subsp. sativus]	RecName: Full=Leucine-rich repeat receptor protein kinase MSL1 {ECO:0000305}; EC=2.7.11.1 {ECO:0000255}; AltName: Full=MSP1 protein homolog 1 {ECO:0000305}; AltName: Full=MSP1-like protein 1 {ECO:0000303|PubMed:18248596}; Flags: Precursor;	SubName: Full=Uncharacterized protein {ECO:0000313|EMBL:KZN00124.1};	FOG: Leucine rich repeat	GO:0004674,protein serine/threonine kinase activity; GO:0016021,integral component of membrane; GO:0005524,ATP binding; GO:0005886,plasma membrane	--
XLOC_023627	NW_018744092.1	3059836	3060728	.	--	uncharacterized protein LOC110701915 [Chenopodium quinoa]	--	SubName: Full=Uncharacterized protein {ECO:0000313|EMBL:KNA12629.1};	--	--	--
XLOC_006369	NW_018742669.1	301641	302779	+	--	--	--	--	--	--	--
XLOC_023629	NW_018744092.1	3476475	3476760	.	--	--	--	--	--	--	--
XLOC_007042	NW_018742730.1	619915	620989	.	K22418 11beta/17beta-hydroxysteroid dehydrogenase [EC:1.1.1.146 1.1.1.-] | (RefSeq) 11-beta-hydroxysteroid dehydrogenase 1B-like (A)	uncharacterized protein LOC110786003 [Spinacia oleracea]	--	SubName: Full=Uncharacterized protein {ECO:0000313|EMBL:PIA33836.1};	--	--	Cotton fibre expressed protein
XLOC_030592	NW_018744757.1	1408324	1409074	.	--	--	--	--	--	--	--
XLOC_019978	NW_018743850.1	5155366	5155857	.	--	--	--	--	--	--	--
XLOC_037267	NW_018745454.1	4529537	4543914	-	--	--	--	--	--	--	--
XLOC_015773	NW_018743355.1	20500	20836	.	--	uncharacterized protein LOC110730409 [Chenopodium quinoa]	--	--	--	--	--
XLOC_026523	NW_018744369.1	538661	544652	.	K19525 vacuolar protein sorting-associated protein 13A/C | (RefSeq) uncharacterized protein LOC110098611 (A)	uncharacterized protein LOC110777940 [Spinacia oleracea]	RecName: Full=RNA-directed DNA polymerase homolog; EC=2.7.7.48; AltName: Full=Reverse transcriptase homolog;	SubName: Full=Putative reverse transcriptase domain-containing protein {ECO:0000313|EMBL:OTG13256.1};	FOG: Transposon-encoded proteins with TYA, reverse transcriptase, integrase domains in various combinations	GO:0003964,RNA-directed DNA polymerase activity; GO:0003968,RNA-directed 5'-3' RNA polymerase activity; GO:0005739,mitochondrion	--
XLOC_001839	NW_018742249.1	213350	214958	+	K17086 transmembrane 9 superfamily member 2/4 | (RefSeq) uncharacterized LOC101300290 (A)	uncharacterized protein LOC110786475 [Spinacia oleracea]	--	SubName: Full=Uncharacterized protein {ECO:0000313|EMBL:KNA10075.1}; Flags: Fragment;	--	GO:0004803,transposase activity; GO:0006313,transposition, DNA-mediated; GO:0003677,DNA binding	--
XLOC_007320	NW_018742733.1	3376580	3377683	.	K06676 condensin complex subunit 2 | (RefSeq) condensin complex subunit 2-like (A)	uncharacterized protein LOC110723887 [Chenopodium quinoa]	--	SubName: Full=Uncharacterized protein {ECO:0000313|EMBL:KNA11253.1};	--	GO:0016021,integral component of membrane	--
XLOC_011125	NW_018743032.1	3063364	3065689	+	--	hypothetical protein SOVF_045390 [Spinacia oleracea]	--	SubName: Full=Uncharacterized protein {ECO:0000313|EMBL:KNA21207.1};	--	--	--
XLOC_032816	NW_018744996.1	2382356	2383396	.	K05666 ATP-binding cassette, subfamily C (CFTR/MRP), member 2 | (RefSeq) ABC transporter C family member 10-like (A)	putative retrotransposon Ty1-copia subclass protein, partial [Trifolium pratense]	RecName: Full=Retrovirus-related Pol polyprotein from transposon TNT 1-94; Includes: RecName: Full=Protease; EC=3.4.23.-; Includes: RecName: Full=Reverse transcriptase; EC=2.7.7.49; Includes: RecName: Full=Endonuclease;	SubName: Full=Integrase {ECO:0000313|EMBL:AOZ57162.1}; Flags: Fragment;	FOG: Transposon-encoded proteins with TYA, reverse transcriptase, integrase domains in various combinations	GO:0004519,endonuclease activity; GO:0015074,DNA integration; GO:0004190,aspartic-type endopeptidase activity; GO:0008270,zinc ion binding; GO:0003676,nucleic acid binding; GO:0003964,RNA-directed DNA polymerase activity	Integrase core domain
XLOC_036654	NW_018745448.1	4386843	4394834	+	--	--	--	--	--	--	--
XLOC_026865	NW_018744460.1	2206326	2206526	.	--	--	--	--	--	--	--
XLOC_034441	NW_018745105.1	3947508	3948208	-	--	--	--	--	--	--	--
XLOC_038361	NW_018745569.1	1791022	1792357	-	K01285 lysosomal Pro-X carboxypeptidase [EC:3.4.16.2] | (RefSeq) lysosomal Pro-X carboxypeptidase (A)	PREDICTED: lysosomal Pro-X carboxypeptidase [Beta vulgaris subsp. vulgaris]	--	SubName: Full=lysosomal Pro-X carboxypeptidase-like {ECO:0000313|RefSeq:XP_010247724.1};	Prolylcarboxypeptidase (angiotensinase C)	GO:0004180,carboxypeptidase activity; GO:0008236,serine-type peptidase activity	--
XLOC_028625	NW_018744626.1	3533917	3535320	+	--	uncharacterized protein LOC110729176 [Chenopodium quinoa]	--	SubName: Full=Uncharacterized protein {ECO:0000313|EMBL:KNA13656.1}; Flags: Fragment;	--	GO:0003676,nucleic acid binding	NADH-ubiquinone/plastoquinone oxidoreductase chain 6
XLOC_006000	NW_018742616.1	3193717	3194726	.	--	--	--	--	--	--	--
XLOC_013189	NW_018743199.1	4704093	4707506	-	--	uncharacterized protein LOC110704766 [Chenopodium quinoa]	--	SubName: Full=Uncharacterized protein {ECO:0000313|EMBL:KNA24913.1};	--	--	--
XLOC_013209	NW_018743199.1	1650249	1651025	.	--	--	--	--	--	--	--
XLOC_004418	NW_018742461.1	4059154	4059605	.	--	F-box protein SKIP23-like [Chenopodium quinoa]	--	--	--	--	--
XLOC_003741	NW_018742418.1	3154875	3155179	.	--	--	--	--	--	--	--
XLOC_036745	NW_018745448.1	3325120	3326421	-	K17604 zinc finger SWIM domain-containing protein 3 | (RefSeq) protein FAR-RED IMPAIRED RESPONSE 1-like (A)	protein FAR-RED IMPAIRED RESPONSE 1-like [Chenopodium quinoa]	RecName: Full=Protein FAR1-RELATED SEQUENCE 6;	SubName: Full=protein FAR1-RELATED SEQUENCE 5-like {ECO:0000313|RefSeq:XP_018856702.1, ECO:0000313|RefSeq:XP_018856703.1};	--	GO:0009585,red, far-red light phototransduction; GO:0003700,DNA-binding transcription factor activity; GO:0005634,nucleus; GO:0042753,positive regulation of circadian rhythm; GO:0008270,zinc ion binding; GO:0010018,far-red light signaling pathway; GO:0045893,positive regulation of transcription, DNA-templated	--
XLOC_027343	NW_018744502.1	7561489	7561851	.	--	--	--	--	--	--	--
XLOC_034577	NW_018745170.1	4310269	4313367	+	--	hypothetical protein BVRB_9g210770 [Beta vulgaris subsp. vulgaris]	--	SubName: Full=Os02g0328500 protein {ECO:0000313|EMBL:BAS78424.1};	--	--	--
XLOC_010983	NW_018743021.1	214669	218189	-	--	F-box/kelch-repeat protein At3g23880-like [Chenopodium quinoa]	RecName: Full=F-box/kelch-repeat protein At3g06240;	SubName: Full=Uncharacterized protein {ECO:0000313|EMBL:KNA23528.1};	--	--	Reverse transcriptase-like
XLOC_032999	NW_018745003.1	1294569	1295964	+	K10745 ribonuclease H2 subunit C | (RefSeq) uncharacterized protein LOC107416231 (A)	MLP-like protein 43 [Chenopodium quinoa]	RecName: Full=MLP-like protein 43;	SubName: Full=Uncharacterized protein {ECO:0000313|EMBL:KNA19810.1};	--	GO:0006952,defense response; GO:0009607,response to biotic stimulus; GO:0009507,chloroplast	Pathogenesis-related protein Bet v I family
XLOC_034739	NW_018745174.1	74961	79333	-	--	--	--	--	--	--	--
XLOC_035850	NW_018745311.1	1195507	1195960	.	--	--	--	--	--	--	--
XLOC_010278	NW_018742966.1	100304	102439	-	K20769 fatty acid omega-hydroxylase [EC:1.14.-.-] | (RefSeq) cytochrome P450 94A2-like (A)	hypothetical protein BVRB_5g120610 [Beta vulgaris subsp. vulgaris]	RecName: Full=Proteinase inhibitor; AltName: Full=LUTI;	SubName: Full=Proteinase inhibitor BTIw1 {ECO:0000313|EMBL:ABB96723.1};	--	GO:0009611,response to wounding; GO:0004867,serine-type endopeptidase inhibitor activity	--
XLOC_032997	NW_018745003.1	1259698	1262146	+	--	--	--	--	--	--	--
XLOC_013747	NW_018743212.1	6151312	6151613	-	--	--	--	--	--	--	--
XLOC_026590	NW_018744428.1	6846	7612	.	--	uncharacterized protein LOC110686644 [Chenopodium quinoa]	--	--	--	--	--
XLOC_007896	NW_018742770.1	4272440	4272739	.	--	--	--	--	--	--	--
XLOC_020769	NW_018743920.1	740260	740906	+	--	--	--	--	--	--	--
XLOC_027807	NW_018744560.1	615522	616166	-	--	--	--	--	--	--	--
XLOC_036615	NW_018745424.1	17960	18471	.	--	uncharacterized protein LOC110700074 isoform X2 [Chenopodium quinoa]	--	SubName: Full=uncharacterized protein LOC104604999 {ECO:0000313|RefSeq:XP_010267895.1};	--	--	--
XLOC_007305	NW_018742733.1	1324992	1325886	.	--	--	--	--	--	--	--
XLOC_001861	NW_018742263.1	2715764	2716601	+	--	--	--	--	--	--	--
XLOC_024962	NW_018744239.1	11498501	11499376	+	--	uncharacterized protein LOC110683681 [Chenopodium quinoa]	--	--	--	--	--
XLOC_005489	NW_018742577.1	3203324	3206842	+	K19984 exocyst complex component 5 | (RefSeq) uncharacterized protein LOC113272286 (A)	zinc finger BED domain-containing protein RICESLEEPER 2-like [Chenopodium quinoa]	RecName: Full=Zinc finger BED domain-containing protein RICESLEEPER 2; AltName: Full=Transposase-like protein RICESLEEPER 2;	SubName: Full=Uncharacterized protein {ECO:0000313|EMBL:KNA05978.1}; Flags: Fragment;	Tam3-transposase (Ac family)	GO:0003700,DNA-binding transcription factor activity; GO:0005634,nucleus; GO:0009791,post-embryonic development; GO:0006357,regulation of transcription by RNA polymerase II; GO:0000977,RNA polymerase II regulatory region sequence-specific DNA binding; GO:0046983,protein dimerization activity; GO:0046872,metal ion binding; GO:0006351,transcription, DNA-templated	Domain of unknown function (DUF4413)
XLOC_025038	NW_018744239.1	4464524	4465406	-	--	ethylene-insensitive protein 2-like [Chenopodium quinoa]	--	--	--	--	--
XLOC_020317	NW_018743894.1	624993	625886	-	--	--	--	--	--	--	--
XLOC_036465	NW_018745410.1	2321108	2323357	.	--	uncharacterized protein LOC110716638 [Chenopodium quinoa]	--	SubName: Full=Uncharacterized protein {ECO:0000313|EMBL:KNA13078.1};	--	--	--
XLOC_032630	NW_018744991.1	514249	515067	.	--	hypothetical protein BVRB_8g199600 [Beta vulgaris subsp. vulgaris]	--	SubName: Full=Uncharacterized protein {ECO:0000313|EMBL:KMS96777.1};	--	--	--
XLOC_025212	NW_018744240.1	1298298	1298939	+	--	--	--	--	--	--	Domain of unknown function (DUF4590)
XLOC_028103	NW_018744589.1	274634	275151	.	--	--	--	--	--	--	--
XLOC_030804	NW_018744821.1	2886056	2889594	-	--	--	--	--	--	--	UPF0176 acylphosphatase like domain
XLOC_026129	NW_018744311.1	2650433	2651559	-	--	--	--	--	--	--	--
XLOC_000823	NW_018742204.1	21536579	21537108	.	--	--	--	--	--	--	--
XLOC_007472	NW_018742738.1	11879577	11881756	-	K19984 exocyst complex component 5 | (RefSeq) uncharacterized protein LOC113272286 (A)	zinc finger BED domain-containing protein RICESLEEPER 2-like [Chenopodium quinoa]	RecName: Full=Zinc finger BED domain-containing protein RICESLEEPER 2; AltName: Full=Transposase-like protein RICESLEEPER 2;	SubName: Full=zinc finger BED domain-containing protein RICESLEEPER 2-like {ECO:0000313|RefSeq:XP_016740977.1, ECO:0000313|RefSeq:XP_016742294.1};	Tam3-transposase (Ac family)	GO:0003700,DNA-binding transcription factor activity; GO:0005634,nucleus; GO:0009791,post-embryonic development; GO:0006357,regulation of transcription by RNA polymerase II; GO:0000977,RNA polymerase II regulatory region sequence-specific DNA binding; GO:0046983,protein dimerization activity; GO:0046872,metal ion binding; GO:0006351,transcription, DNA-templated	--
XLOC_025775	NW_018744301.1	7005039	7005769	.	--	--	--	--	--	--	--
XLOC_015734	NW_018743332.1	101051	109100	-	--	uncharacterized protein LOC110688912 [Chenopodium quinoa]	--	--	--	--	--
XLOC_022990	NW_018744066.1	1627697	1628129	.	K22378 E3 ubiquitin-protein ligase RNF181 [EC:2.3.2.27] | (RefSeq) E3 ubiquitin-protein ligase RZF1-like (A)	hypothetical protein BVRB_8g197400 [Beta vulgaris subsp. vulgaris]	RecName: Full=E3 ubiquitin-protein ligase RDUF1 {ECO:0000305}; EC=2.3.2.27 {ECO:0000305}; AltName: Full=RING and DUF1117 domain-containing protein 1 {ECO:0000305}; Short=AtRDUF1 {ECO:0000303|PubMed:22405823}; AltName: Full=RING-type E3 ubiquitin transferase RDUF1 {ECO:0000305};	SubName: Full=Uncharacterized protein {ECO:0000313|EMBL:KNA05680.1};	FOG: Predicted E3 ubiquitin ligase	GO:0005737,cytoplasm; GO:0009737,response to abscisic acid; GO:0010200,response to chitin; GO:0061630,ubiquitin protein ligase activity; GO:0005829,cytosol; GO:0009738,abscisic acid-activated signaling pathway; GO:0005634,nucleus; GO:0051865,protein autoubiquitination; GO:0042787,NA; GO:0009414,response to water deprivation; GO:0043161,proteasome-mediated ubiquitin-dependent protein catabolic pro…	Ring finger domain
XLOC_008550	NW_018742817.1	314757	314976	.	--	--	--	--	--	--	--
XLOC_005722	NW_018742607.1	996774	998683	+	--	--	--	--	--	--	--
XLOC_020736	NW_018743919.1	2526105	2526874	.	--	uncharacterized protein LOC110701538 [Chenopodium quinoa]	--	SubName: Full=uncharacterized protein LOC107777067 {ECO:0000313|RefSeq:XP_016452524.1};	--	--	--
XLOC_003083	NW_018742400.1	1306754	1307982	.	--	IRK-interacting protein-like isoform X1 [Chenopodium quinoa]	--	SubName: Full=Uncharacterized protein {ECO:0000313|EMBL:KNA25427.1};	--	--	--
XLOC_003744	NW_018742418.1	3232781	3233253	.	--	--	--	--	--	--	--
XLOC_031297	NW_018744874.1	2702642	2704964	+	K01309 ubiquitin carboxyl-terminal hydrolase MINDY-1/2 [EC:3.4.19.12] | (RefSeq) ubiquitin carboxyl-terminal hydrolase MINDY-1-like (A)	ubiquitin carboxyl-terminal hydrolase MINDY-1-like [Chenopodium quinoa]	RecName: Full=LRR receptor-like serine/threonine-protein kinase FEI 1; EC=2.7.11.1; Flags: Precursor;	SubName: Full=LRR receptor-like serine/threonine-protein kinase FEI 1 {ECO:0000313|RefSeq:XP_018852156.1, ECO:0000313|RefSeq:XP_018852157.1};	--	GO:0004674,protein serine/threonine kinase activity; GO:0016021,integral component of membrane; GO:0005886,plasma membrane; GO:0005524,ATP binding; GO:0030244,cellulose biosynthetic process	--
XLOC_029599	NW_018744662.1	1162107	1162807	-	--	--	--	--	--	--	--
XLOC_008288	NW_018742815.1	4094027	4100728	+	K12874 intron-binding protein aquarius | (RefSeq) LOW QUALITY PROTEIN: intron-binding protein aquarius-like (A)	uncharacterized protein LOC110705275 [Chenopodium quinoa]	--	SubName: Full=Uncharacterized protein {ECO:0000313|EMBL:CCA66020.1};	FOG: Reverse transcriptase	GO:0003676,nucleic acid binding	--
XLOC_015401	NW_018743327.1	3371457	3376601	+	--	--	--	--	--	--	--
XLOC_011519	NW_018743051.1	1458414	1459792	.	--	NDR1/HIN1-like protein 1 [Chenopodium quinoa]	RecName: Full=NDR1/HIN1-like protein 1 {ECO:0000303|Ref.1};	SubName: Full=Uncharacterized protein {ECO:0000313|EMBL:KNA06098.1};	--	GO:0009506,plasmodesma; GO:0046658,anchored component of plasma membrane; GO:0016021,integral component of membrane; GO:0051607,defense response to virus; GO:0004871,NA	--
XLOC_013144	NW_018743199.1	3448264	3452327	-	K01528 dynamin GTPase [EC:3.6.5.5] | (Kazusa) Lj0g3v0199559.2; - (A)	uncharacterized protein LOC110731910 [Chenopodium quinoa]	RecName: Full=Retrovirus-related Pol polyprotein from transposon RE1; AltName: Full=Retro element 1 {ECO:0000303|PubMed:10689195}; Short=AtRE1 {ECO:0000303|PubMed:10689195}; Includes: RecName: Full=Protease RE1; EC=3.4.23.-; Includes: RecName: Full=Reverse transcriptase RE1; EC=2.7.7.49; Includes: RecName: Full=Endonuclease RE1;	SubName: Full=Putative reverse transcriptase, RNA-dependent DNA polymerase {ECO:0000313|EMBL:OTG19721.1};	FOG: Transposon-encoded proteins with TYA, reverse transcriptase, integrase domains in various combinations	GO:0006310,DNA recombination; GO:0004519,endonuclease activity; GO:0015074,DNA integration; GO:0004190,aspartic-type endopeptidase activity; GO:0003676,nucleic acid binding; GO:0003964,RNA-directed DNA polymerase activity; GO:0046872,metal ion binding	--
XLOC_015358	NW_018743294.1	514887	515656	+	--	--	--	--	--	--	--
XLOC_016716	NW_018743510.1	3349787	3350620	+	--	--	--	--	--	--	--
XLOC_004894	NW_018742487.1	607172	610057	+	--	uncharacterized protein LOC110714039 [Chenopodium quinoa]	--	--	--	--	--
XLOC_013436	NW_018743212.1	254818	256098	+	--	periaxin-like [Chenopodium quinoa]	--	SubName: Full=Uncharacterized protein {ECO:0000313|EMBL:KNA24789.1};	--	--	--
XLOC_037761	NW_018745523.1	313988	418999	+	--	--	--	--	--	--	--
XLOC_038366	NW_018745569.1	772165	773371	.	--	hypothetical protein SOVF_206410, partial [Spinacia oleracea]	--	SubName: Full=Uncharacterized protein {ECO:0000313|EMBL:KNA03701.1}; Flags: Fragment;	--	--	Reverse transcriptase-like
XLOC_034355	NW_018745082.1	1137187	1139939	+	--	--	--	--	--	--	--
XLOC_001864	NW_018742263.1	3943138	3944262	+	--	--	--	--	--	--	--
XLOC_022389	NW_018743989.1	28409	29575	.	--	--	--	--	--	--	--
XLOC_036464	NW_018745410.1	2300700	2300934	.	--	--	--	--	--	--	--
XLOC_007631	NW_018742770.1	451155	451842	+	--	--	--	--	--	--	--
XLOC_011518	NW_018743051.1	1377803	1378423	.	--	--	--	--	--	--	--
XLOC_002674	NW_018742381.1	1420878	1425456	+	--	hypothetical protein SOVF_106070 [Spinacia oleracea]	--	SubName: Full=Uncharacterized protein {ECO:0000313|EMBL:KNA14472.1};	--	--	ATHILA ORF-1 family
XLOC_034351	NW_018745082.1	633528	637199	+	K03515 DNA repair protein REV1 [EC:2.7.7.-] | (RefSeq) uncharacterized protein LOC107894697 (A)	uncharacterized protein LOC110723471 [Chenopodium quinoa]	RecName: Full=Retrovirus-related Pol polyprotein from transposon TNT 1-94; Includes: RecName: Full=Protease; EC=3.4.23.-; Includes: RecName: Full=Reverse transcriptase; EC=2.7.7.49; Includes: RecName: Full=Endonuclease;	SubName: Full=Uncharacterized protein {ECO:0000313|EMBL:CAN73272.1};	FOG: Transposon-encoded proteins with TYA, reverse transcriptase, integrase domains in various combinations	GO:0004519,endonuclease activity; GO:0015074,DNA integration; GO:0004190,aspartic-type endopeptidase activity; GO:0008270,zinc ion binding; GO:0003676,nucleic acid binding; GO:0003964,RNA-directed DNA polymerase activity	gag-polypeptide of LTR copia-type
XLOC_038159	NW_018745540.1	1139178	1146340	+	--	hypothetical protein SOVF_064370 [Spinacia oleracea]	--	SubName: Full=Uncharacterized protein {ECO:0000313|EMBL:KNA19144.1};	--	--	--
XLOC_036830	NW_018745448.1	9009598	9010522	.	K01179 endoglucanase [EC:3.2.1.4] | (RefSeq) endoglucanase 8-like (A)	uncharacterized protein LOC110700755 [Chenopodium quinoa]	RecName: Full=Uncharacterized protein At4g02000;	SubName: Full=Uncharacterized protein {ECO:0000313|EMBL:CCA66008.1};	FOG: Reverse transcriptase	--	Domain of unknown function (DUF4283)
XLOC_008595	NW_018742861.1	846919	850609	+	K19984 exocyst complex component 5 | (RefSeq) uncharacterized protein LOC113272286 (A)	zinc finger BED domain-containing protein RICESLEEPER 2-like [Spinacia oleracea]	RecName: Full=Zinc finger BED domain-containing protein DAYSLEEPER; AltName: Full=Transposase-like protein DAYSLEEPER;	SubName: Full=Uncharacterized protein {ECO:0000313|EMBL:KNA08905.1};	Tam3-transposase (Ac family)	GO:0003700,DNA-binding transcription factor activity; GO:0005829,cytosol; GO:0009791,post-embryonic development; GO:0006357,regulation of transcription by RNA polymerase II; GO:0000977,RNA polymerase II regulatory region sequence-specific DNA binding; GO:0046983,protein dimerization activity; GO:0046872,metal ion binding; GO:0005634,nucleus; GO:0006351,transcription, DNA-templated	hAT family C-terminal dimerisation region
XLOC_030432	NW_018744718.1	3467237	3468321	-	--	PREDICTED: WAT1-related protein At1g25270-like [Beta vulgaris subsp. vulgaris]	RecName: Full=WAT1-related protein At5g13670;	RecName: Full=WAT1-related protein {ECO:0000256|RuleBase:RU363077}; Flags: Fragment;	--	GO:0043090,amino acid import; GO:0032973,amino acid export across plasma membrane; GO:0016021,integral component of membrane; GO:0080144,amino acid homeostasis; GO:0005886,plasma membrane; GO:0015171,amino acid transmembrane transporter activity	--
XLOC_017637	NW_018743574.1	4911185	4912648	-	--	hypothetical protein BVRB_6g134850 isoform A [Beta vulgaris subsp. vulgaris]	RecName: Full=EPIDERMAL PATTERNING FACTOR-like protein 1 {ECO:0000303|PubMed:19435754}; Short=EPF-like protein 1; Contains: RecName: Full=MEPFL1 {ECO:0000305}; Flags: Precursor;	SubName: Full=Uncharacterized protein {ECO:0000313|EMBL:KNA19193.1}; Flags: Fragment;	--	GO:0010374,stomatal complex development; GO:0005576,extracellular region; GO:0010052,guard cell differentiation	--
XLOC_026363	NW_018744367.1	9122694	9123295	+	--	glutamate receptor 2.2-like [Chenopodium quinoa]	--	--	--	--	CCSMST1 family
XLOC_007957	NW_018742798.1	2332600	2334417	-	--	uncharacterized protein LOC110704848 [Chenopodium quinoa]	--	SubName: Full=Uncharacterized protein {ECO:0000313|EMBL:CCA66036.1};	--	GO:0003676,nucleic acid binding	--
XLOC_028412	NW_018744616.1	3113846	3114765	-	--	--	--	--	--	--	--
XLOC_003120	NW_018742410.1	1022275	1022957	+	--	zinc finger MYM-type protein 1-like [Chenopodium quinoa]	--	SubName: Full=Uncharacterized protein {ECO:0000313|EMBL:KNA26131.1};	--	GO:0016021,integral component of membrane	--
XLOC_015904	NW_018743381.1	400313	401458	.	--	--	--	--	--	--	--
XLOC_015832	NW_018743373.1	646187	649896	-	K01598 phosphopantothenoylcysteine decarboxylase [EC:4.1.1.36] | (RefSeq) phosphopantothenoylcysteine decarboxylase-like (A)	phosphopantothenoylcysteine decarboxylase-like [Chenopodium quinoa]	RecName: Full=Phosphopantothenoylcysteine decarboxylase; Short=PPCDC; EC=4.1.1.36; AltName: Full=AtCoaC1; AltName: Full=Halotolerance protein Hal3a; Short=AtHal3a;	SubName: Full=Uncharacterized protein {ECO:0000313|EMBL:KNA03091.1};	Halotolerance protein HAL3 (contains flavoprotein domain)	GO:0004633,phosphopantothenoylcysteine decarboxylase activity; GO:0042538,hyperosmotic salinity response; GO:0040008,regulation of growth; GO:0005829,cytosol; GO:0015937,coenzyme A biosynthetic process	Flavoprotein
XLOC_000814	NW_018742204.1	19712885	19713167	.	--	--	--	--	--	--	--
XLOC_025771	NW_018744301.1	5546148	5546755	.	--	--	--	--	--	--	--
XLOC_025163	NW_018744239.1	10507879	10508183	.	--	--	--	--	--	--	--
XLOC_025660	NW_018744298.1	777078	777783	+	--	--	--	--	--	--	--
XLOC_026379	NW_018744367.1	156402	157626	-	--	--	--	--	--	--	--
XLOC_037853	NW_018745523.1	143069	144902	-	--	--	--	--	--	--	--
XLOC_027421	NW_018744517.1	2365250	2365544	.	--	--	--	--	--	--	--
XLOC_022002	NW_018743955.1	947583	948321	.	--	--	--	--	--	--	--
XLOC_033116	NW_018745003.1	5216307	5217421	+	--	--	--	--	--	--	--
XLOC_030782	NW_018744821.1	3446031	3447599	+	--	--	--	--	--	--	--
XLOC_036598	NW_018745419.1	575670	579165	+	K01213 galacturan 1,4-alpha-galacturonidase [EC:3.2.1.67] | (RefSeq) probable polygalacturonase At3g15720 (A)	uncharacterized protein LOC110689530 [Chenopodium quinoa]	--	SubName: Full=Uncharacterized protein {ECO:0000313|EMBL:EEC76472.1};	--	GO:0008270,zinc ion binding; GO:0003676,nucleic acid binding	--
XLOC_016159	NW_018743391.1	3138228	3140153	+	K10398 kinesin family member 11 | (RefSeq) hypothetical protein (A)	zinc finger BED domain-containing protein DAYSLEEPER-like [Spinacia oleracea]	RecName: Full=Putative AC transposase; AltName: Full=ORFA;	SubName: Full=Uncharacterized protein {ECO:0000313|EMBL:KNA19843.1};	Tam3-transposase (Ac family)	GO:0006310,DNA recombination; GO:0046983,protein dimerization activity; GO:0032196,transposition; GO:0003677,DNA binding	hAT family C-terminal dimerisation region
XLOC_032068	NW_018744947.1	22927	26327	-	K19613 leucine-rich repeat protein SHOC2 | (GenBank) disease resistance protein (NBS-LRR class) family protein (A)	uncharacterized protein LOC110696429 isoform X1 [Chenopodium quinoa]	RecName: Full=Probable disease resistance protein RPP1 {ECO:0000305}; AltName: Full=Protein RECOGNITION OF PERONOSPORA PARASITICA 1 {ECO:0000305};	SubName: Full=Uncharacterized protein {ECO:0000313|EMBL:KNA22025.1};	--	GO:0009817,defense response to fungus, incompatible interaction; GO:0005886,plasma membrane; GO:0005789,endoplasmic reticulum membrane; GO:0006952,defense response; GO:0007165,signal transduction; GO:0043531,ADP binding; GO:0030275,LRR domain binding; GO:0002239,response to oomycetes; GO:0000139,Golgi membrane; GO:0005524,ATP binding	PB1 domain
XLOC_018965	NW_018743722.1	328643	330499	-	--	--	--	--	--	--	--
XLOC_016790	NW_018743510.1	4915556	4916608	-	K17604 zinc finger SWIM domain-containing protein 3 | (RefSeq) hypothetical protein (A)	protein FAR1-RELATED SEQUENCE 5-like [Chenopodium quinoa]	RecName: Full=Protein FAR1-RELATED SEQUENCE 5;	SubName: Full=Uncharacterized protein {ECO:0000313|EMBL:KCW80601.1};	--	GO:0006355,regulation of transcription, DNA-templated; GO:0005634,nucleus; GO:0008270,zinc ion binding	FAR1 DNA-binding domain
XLOC_036204	NW_018745382.1	63676	63946	.	--	--	--	--	--	--	--
XLOC_006151	NW_018742630.1	3667250	3667965	.	--	--	--	--	--	--	--
XLOC_033214	NW_018745003.1	2866387	2874922	-	--	PREDICTED: uncharacterized protein LOC104893810 [Beta vulgaris subsp. vulgaris]	--	SubName: Full=Uncharacterized protein {ECO:0000313|EMBL:KMS95930.1};	--	GO:0008270,zinc ion binding; GO:0003676,nucleic acid binding	zinc-binding in reverse transcriptase
XLOC_001930	NW_018742263.1	6535941	6536252	.	--	--	--	--	--	--	--
XLOC_019150	NW_018743783.1	4901710	4902038	.	K23222 nuclease HARBI1 [EC:3.1.-.-] | (RefSeq) uncharacterized protein LOC104242359 (A)	uncharacterized protein LOC110703215 [Chenopodium quinoa]	--	SubName: Full=Uncharacterized protein {ECO:0000313|EMBL:KNA13077.1}; Flags: Fragment;	Predicted transposase	--	--
XLOC_009791	NW_018742914.1	7045317	7046546	-	--	--	--	--	--	--	--
XLOC_002760	NW_018742385.1	216373	217919	-	K17767 AH receptor-interacting protein | (RefSeq) peptidyl-prolyl cis-trans isomerase FKBP62-like (A)	70 kDa peptidyl-prolyl isomerase-like [Chenopodium quinoa]	--	SubName: Full=Uncharacterized protein {ECO:0000313|EMBL:KMS96588.1};	--	--	--
XLOC_030885	NW_018744830.1	859395	862848	-	K07204 regulatory associated protein of mTOR | (RefSeq) regulatory-associated protein of TOR 1-like isoform X1 (A)	regulatory-associated protein of TOR 1-like isoform X3 [Chenopodium quinoa]	RecName: Full=Regulatory-associated protein of TOR 1; AltName: Full=Protein RAPTOR 1; Short=OsRAPTOR1;	SubName: Full=Uncharacterized protein {ECO:0000313|EMBL:KNA04893.1};	Guanine nucleotide binding protein MIP1	GO:0005737,cytoplasm; GO:0030674,protein binding, bridging; GO:0071230,cellular response to amino acid stimulus; GO:0031931,TORC1 complex; GO:0030307,positive regulation of cell growth; GO:0031929,TOR signaling; GO:0008361,regulation of cell size; GO:0009267,cellular response to starvation; GO:0071902,positive regulation of protein serine/threonine kinase activity; GO:0010506,regulation of autoph…	--
XLOC_008473	NW_018742815.1	3052495	3053195	.	--	--	--	--	--	--	Protein of unknown function (DUF2722)
XLOC_005135	NW_018742541.1	122329	123091	.	K07418 cytochrome P450 family 2 subfamily J [EC:1.14.14.1] | (RefSeq) cytochrome P450 71A8-like (A)	cytochrome P450 71A21-like [Chenopodium quinoa]	RecName: Full=Cytochrome P450 71A4; EC=1.14.-.-; AltName: Full=CYPLXXIA4; AltName: Full=Cytochrome P-450EG2;	SubName: Full=Uncharacterized protein {ECO:0000313|EnsemblPlants:PGSC0003DMT400046706};	Cytochrome P450 CYP2 subfamily	GO:0005506,iron ion binding; GO:0016705,oxidoreductase activity, acting on paired donors, with incorporation or reduction of molecular oxygen; GO:0016021,integral component of membrane; GO:0004497,monooxygenase activity; GO:0020037,heme binding	--
XLOC_029370	NW_018744633.1	5989640	5990738	.	--	--	--	--	--	--	--
XLOC_032823	NW_018744996.1	3734714	3736201	.	K22733 magnesium transporter | (RefSeq) uncharacterized LOC100244618 (A)	pentatricopeptide repeat-containing protein At4g30700-like [Chenopodium quinoa]	RecName: Full=Pentatricopeptide repeat-containing protein At4g30700; AltName: Full=Protein DYW9;	SubName: Full=Uncharacterized protein {ECO:0000313|EMBL:KNA07902.1};	FOG: PPR repeat	GO:0004519,endonuclease activity; GO:0016554,cytidine to uridine editing; GO:0080156,mitochondrial mRNA modification; GO:0005739,mitochondrion; GO:0000963,mitochondrial RNA processing; GO:0003723,RNA binding; GO:0009507,chloroplast; GO:0008270,zinc ion binding	--
XLOC_013936	NW_018743252.1	9153444	9154319	+	--	--	--	--	--	--	--
XLOC_027925	NW_018744582.1	2724772	2727866	+	--	PREDICTED: wound-induced protein 1-like, partial [Nicotiana attenuata]	RecName: Full=Senescence associated gene 20 {ECO:0000303|PubMed:10444084}; AltName: Full=Protein WOUND-INDUCED 12 {ECO:0000303|PubMed:12857840}; Short=AtWI-12 {ECO:0000303|PubMed:12857840};	SubName: Full=Uncharacterized protein {ECO:0000313|EMBL:EEF41527.1};	--	GO:0010150,leaf senescence; GO:0007568,aging; GO:0009620,response to fungus; GO:0009624,response to nematode; GO:0010193,response to ozone; GO:0002238,response to molecule of fungal origin	--
XLOC_019048	NW_018743742.1	153039	153503	.	K03327 multidrug resistance protein, MATE family | (RefSeq) protein DETOXIFICATION 16-like (A)	PREDICTED: protein DETOXIFICATION 16-like [Beta vulgaris subsp. vulgaris]	--	RecName: Full=alpha-1,2-Mannosidase {ECO:0000256|RuleBase:RU361193}; EC=3.2.1.- {ECO:0000256|RuleBase:RU361193};	--	GO:0003676,nucleic acid binding; GO:0016020,membrane; GO:0004571,mannosyl-oligosaccharide 1,2-alpha-mannosidase activity; GO:0005509,calcium ion binding; GO:0008152,metabolic process; GO:0008270,zinc ion binding	--
XLOC_006154	NW_018742634.1	18164	18439	.	--	hypothetical protein CQW23_35730 [Capsicum baccatum]	--	SubName: Full=Uncharacterized protein {ECO:0000313|EnsemblPlants:Bo00616s010.1};	--	--	--
XLOC_036370	NW_018745410.1	1058245	1060950	+	K14003 prolactin regulatory element-binding protein | (RefSeq) SEC12-like protein 1 (A)	uncharacterized protein LOC110783663 [Spinacia oleracea]	RecName: Full=SEC12-like protein 1; AltName: Full=Protein PHOSPHATE TRANSPORTER TRAFFIC FACILITATOR 1; Short=PHF-1;	SubName: Full=Uncharacterized protein {ECO:0000313|EMBL:KNA25251.1};	Prolactin regulatory element-binding protein/Protein transport protein SEC12p	GO:0030176,integral component of endoplasmic reticulum membrane; GO:0006888,ER to Golgi vesicle-mediated transport; GO:0005783,endoplasmic reticulum; GO:0009306,protein secretion; GO:0005096,GTPase activator activity; GO:0005090,Sar guanyl-nucleotide exchange factor activity; GO:0006817,phosphate ion transport; GO:0051020,GTPase binding; GO:0016036,cellular response to phosphate starvation; GO:00…	--
XLOC_013208	NW_018743199.1	1618438	1618718	.	--	--	--	--	--	--	--
XLOC_030702	NW_018744790.1	493048	494467	.	--	--	--	--	--	--	--
XLOC_015372	NW_018743297.1	110136	116779	-	--	hypothetical protein MTR_0002s0260 [Medicago truncatula]	RecName: Full=Uncharacterized protein ycf68; AltName: Full=ORF113;	SubName: Full=Uncharacterized protein {ECO:0000313|EMBL:KEH17696.1, ECO:0000313|EnsemblPlants:KEH17696};	--	GO:0009507,chloroplast	--
XLOC_035803	NW_018745291.1	131264	132146	.	K04125 gibberellin 2-oxidase [EC:1.14.11.13] | (RefSeq) gibberellin 2-beta-dioxygenase 7 (A)	PREDICTED: uncharacterized protein K02A2.6-like [Ricinus communis]	RecName: Full=RNA-directed DNA polymerase homolog; EC=2.7.7.48; AltName: Full=Reverse transcriptase homolog;	SubName: Full=Uncharacterized protein {ECO:0000313|EMBL:KNA24590.1}; Flags: Fragment;	FOG: Transposon-encoded proteins with TYA, reverse transcriptase, integrase domains in various combinations	GO:0003964,RNA-directed DNA polymerase activity; GO:0003968,RNA-directed 5'-3' RNA polymerase activity; GO:0005739,mitochondrion	--
XLOC_012807	NW_018743196.1	2488618	2489368	-	--	--	--	--	--	--	--
XLOC_039516	NW_018745684.1	6102935	6103202	.	--	--	--	--	--	--	--
XLOC_036284	NW_018745395.1	848940	849327	-	--	uncharacterized protein LOC110720537 [Chenopodium quinoa]	--	--	--	--	--
XLOC_008469	NW_018742815.1	1716964	1717197	.	--	--	--	--	--	--	--
XLOC_001018	NW_018742205.1	7378520	7389139	+	--	--	--	--	--	--	--
XLOC_033331	NW_018745003.1	5246578	5248071	.	--	uncharacterized protein LOC110720241 [Chenopodium quinoa]	--	SubName: Full=Uncharacterized protein {ECO:0000313|EMBL:KNA17755.1};	--	--	--
XLOC_025152	NW_018744239.1	7968994	7969556	.	--	--	--	--	--	--	--
XLOC_000811	NW_018742204.1	19464740	19466087	.	--	uncharacterized protein LOC110721052 [Chenopodium quinoa]	--	--	--	--	--
XLOC_005738	NW_018742607.1	92303	92914	.	--	--	--	--	--	--	--
XLOC_018461	NW_018743691.1	3702561	3704498	+	K02469 DNA gyrase subunit A [EC:5.99.1.3] | (RefSeq) DNA gyrase subunit A, chloroplastic/mitochondrial-like (A)	Ty3/gypsy retrotransposon protein [Beta vulgaris subsp. vulgaris]	--	SubName: Full=Ty3/gypsy retrotransposon protein {ECO:0000313|EMBL:AFK13856.1};	FOG: Transposon-encoded proteins with TYA, reverse transcriptase, integrase domains in various combinations	GO:0015074,DNA integration; GO:0003676,nucleic acid binding	Integrase zinc binding domain
XLOC_034944	NW_018745177.1	3237244	3237982	.	--	--	--	--	--	--	--
XLOC_011121	NW_018743032.1	2692883	2697749	+	K19199 histone-lysine N-methyltransferase SETD3 [EC:2.1.1.43] | (RefSeq) uncharacterized protein LOC110684701 (A)	uncharacterized protein LOC110696356 isoform X2 [Chenopodium quinoa]	--	--	--	--	--
XLOC_032538	NW_018744991.1	1010989	1014817	-	--	--	--	--	--	--	Uncharacterized protein conserved in bacteria (DUF2130)
XLOC_027742	NW_018744537.1	1004274	1005223	.	K19613 leucine-rich repeat protein SHOC2 | (RefSeq) LRR receptor-like serine/threonine-protein kinase EFR (A)	probable LRR receptor-like serine/threonine-protein kinase At3g47570 [Chenopodium quinoa]	RecName: Full=LRR receptor-like serine/threonine-protein kinase EFR; EC=2.7.11.1; AltName: Full=Elongation factor Tu receptor; Short=EF-Tu receptor; Flags: Precursor;	SubName: Full=Uncharacterized protein {ECO:0000313|EMBL:KNA23015.1};	--	GO:0010204,defense response signaling pathway, resistance gene-independent; GO:0002764,immune response-regulating signaling pathway; GO:0016045,detection of bacterium; GO:0016021,integral component of membrane; GO:0009626,plant-type hypersensitive response; GO:0004674,protein serine/threonine kinase activity; GO:0012505,endomembrane system; GO:0010359,regulation of anion channel activity; GO:0005…	--
XLOC_028294	NW_018744593.1	5834943	5835625	.	--	--	--	--	--	--	--
XLOC_038365	NW_018745569.1	324824	325713	.	--	--	--	--	--	--	--
XLOC_015318	NW_018743292.1	6168006	6168293	.	--	--	--	--	--	--	--
XLOC_012570	NW_018743175.1	5102281	5106443	-	K07904 Ras-related protein Rab-11A | (RefSeq) ras-related protein YPT3 (A)	ras-related protein YPT3 [Spinacia oleracea]	RecName: Full=Ras-related protein Rab11D;	SubName: Full=Uncharacterized protein {ECO:0000313|EMBL:KNA17409.1};	GTPase Rab11/YPT3, small G protein superfamily	GO:0005886,plasma membrane; GO:0003924,GTPase activity; GO:0005525,GTP binding	--
XLOC_033719	NW_018745024.1	9234652	9236362	-	K08867 WNK lysine deficient protein kinase [EC:2.7.11.1] | (RefSeq) probable serine/threonine-protein kinase WNK6 (A)	PREDICTED: probable serine/threonine-protein kinase WNK6 [Beta vulgaris subsp. vulgaris]	RecName: Full=Serine/threonine-protein kinase WNK8; Short=AtWNK8; EC=2.7.11.1; AltName: Full=Protein kinase with no lysine 8;	SubName: Full=Uncharacterized protein {ECO:0000313|EMBL:KMT02282.1};	Serine/threonine protein kinase	GO:0048573,photoperiodism, flowering; GO:0006468,protein phosphorylation; GO:0005829,cytosol; GO:0009911,positive regulation of flower development; GO:0010228,vegetative to reproductive phase transition of meristem; GO:0009909,regulation of flower development; GO:0004674,protein serine/threonine kinase activity; GO:0005524,ATP binding; GO:0004672,protein kinase activity; GO:0035556,intracellular …	--
XLOC_016257	NW_018743391.1	2969606	2970024	.	K03040 DNA-directed RNA polymerase subunit alpha [EC:2.7.7.6] | (RefSeq) rpoA, CDC77_pgp031; RpoA (A)	RpoA (chloroplast) [Chenopodium album]	RecName: Full=DNA-directed RNA polymerase subunit alpha {ECO:0000255|HAMAP-Rule:MF_00059}; Short=PEP {ECO:0000255|HAMAP-Rule:MF_00059}; EC=2.7.7.6 {ECO:0000255|HAMAP-Rule:MF_00059}; AltName: Full=Plastid-encoded RNA polymerase subunit alpha {ECO:0000255|HAMAP-Rule:MF_00059}; Short=RNA polymerase subunit alpha {ECO:0000255|HAMAP-Rule:MF_00059};	RecName: Full=DNA-directed RNA polymerase subunit alpha {ECO:0000256|HAMAP-Rule:MF_00059}; Short=RNAP subunit alpha {ECO:0000256|HAMAP-Rule:MF_00059}; EC=2.7.7.6 {ECO:0000256|HAMAP-Rule:MF_00059}; AltName: Full=RNA polymerase subunit alpha {ECO:0000256|HAMAP-Rule:MF_00059}; AltName: Full=Transcriptase subunit alpha {ECO:0000256|HAMAP-Rule:MF_00059};	--	GO:0003899,DNA-directed 5'-3' RNA polymerase activity; GO:0046983,protein dimerization activity; GO:0009507,chloroplast; GO:0006351,transcription, DNA-templated; GO:0003677,DNA binding	--
XLOC_034445	NW_018745105.1	2321380	2324909	.	K10406 kinesin family member C2/C3 | (RefSeq) kinesin KP1-like (A)	hypothetical protein SOVF_087610 [Spinacia oleracea]	--	SubName: Full=Uncharacterized protein {ECO:0000313|EMBL:KNA16570.1};	--	GO:0008270,zinc ion binding; GO:0003676,nucleic acid binding	--
XLOC_007918	NW_018742789.1	128	356	.	--	protein NLP2-like [Chenopodium quinoa]	RecName: Full=Protein NLP8; Short=AtNLP8; AltName: Full=NIN-like protein 8; AltName: Full=Nodule inception protein-like protein 8;	SubName: Full=Protein NLP8 {ECO:0000313|EMBL:EXC33984.1};	--	GO:0003700,DNA-binding transcription factor activity; GO:0006355,regulation of transcription, DNA-templated; GO:0005634,nucleus; GO:0006351,transcription, DNA-templated; GO:0003677,DNA binding	PB1 domain
XLOC_019977	NW_018743850.1	4932120	4933204	.	--	hypothetical protein SOVF_113330 [Spinacia oleracea]	--	SubName: Full=Uncharacterized protein {ECO:0000313|EMBL:KNA13811.1};	--	GO:0016021,integral component of membrane	--
XLOC_016526	NW_018743448.1	1091357	1091811	-	--	--	--	--	--	--	--
XLOC_032890	NW_018745000.1	2042099	2043813	-	K02985 small subunit ribosomal protein S3e | (RefSeq) uncharacterized protein LOC110716185 isoform X1 (A)	uncharacterized protein LOC110714373 [Chenopodium quinoa]	--	SubName: Full=Uncharacterized protein {ECO:0000313|EMBL:KNA03527.1}; Flags: Fragment;	--	GO:0003676,nucleic acid binding	--
XLOC_023628	NW_018744092.1	3443452	3443898	.	--	--	--	--	--	--	--
XLOC_035560	NW_018745286.1	1431910	1432965	+	--	--	--	--	--	--	--
XLOC_025277	NW_018744249.1	347779	348472	.	--	--	--	--	--	--	--
XLOC_013672	NW_018743212.1	2545812	2546428	-	--	hypothetical protein BVRB_8g194020 [Beta vulgaris subsp. vulgaris]	--	SubName: Full=Uncharacterized protein {ECO:0000313|EMBL:KNA20991.1};	--	GO:0009611,response to wounding; GO:0004867,serine-type endopeptidase inhibitor activity	--
XLOC_039514	NW_018745684.1	5962115	5962769	.	--	--	--	--	--	--	--
XLOC_020735	NW_018743919.1	2524905	2525443	.	--	--	--	--	--	--	--
XLOC_021604	NW_018743942.1	2378706	2380943	.	K17767 AH receptor-interacting protein | (RefSeq) peptidyl-prolyl cis-trans isomerase FKBP62-like (A)	uncharacterized protein LOC110714482 [Chenopodium quinoa]	RecName: Full=Peptidyl-prolyl cis-trans isomerase FKBP62; Short=PPIase FKBP62; EC=5.2.1.8; AltName: Full=70 kDa peptidyl-prolyl isomerase; AltName: Full=FK506-binding protein 62; Short=AtFKBP62; AltName: Full=Immunophilin FKBP62; AltName: Full=Peptidylprolyl isomerase ROF1; AltName: Full=Protein ROTAMASE FKBP 1; AltName: Full=Rotamase;	SubName: Full=Uncharacterized protein {ECO:0000313|EMBL:KMS96588.1};	FKBP-type peptidyl-prolyl cis-trans isomerase	GO:0005737,cytoplasm; GO:0005634,nucleus; GO:0005528,FK506 binding; GO:0005516,calmodulin binding; GO:0003755,peptidyl-prolyl cis-trans isomerase activity; GO:0061077,chaperone-mediated protein folding; GO:0070370,cellular heat acclimation	--
XLOC_016562	NW_018743466.1	773902	776145	+	--	uncharacterized protein LOC110712813 [Chenopodium quinoa]	--	--	--	--	--
XLOC_010152	NW_018742959.1	1522133	1522338	.	--	uncharacterized protein LOC110699547 [Chenopodium quinoa]	--	--	--	--	--
XLOC_037578	NW_018745461.1	1244797	1245308	.	--	--	--	--	--	--	--
XLOC_036422	NW_018745410.1	687701	688522	-	K10691 E3 ubiquitin-protein ligase UBR4 [EC:2.3.2.27] | (RefSeq) auxin transport protein BIG-like (A)	auxin transport protein BIG-like [Chenopodium quinoa]	--	SubName: Full=Uncharacterized protein {ECO:0000313|EMBL:KNA12234.1};	--	GO:0008270,zinc ion binding	--
XLOC_010066	NW_018742951.1	6658068	6661902	-	K19984 exocyst complex component 5 | (RefSeq) uncharacterized protein LOC113272286 (A)	zinc finger BED domain-containing protein RICESLEEPER 2-like [Chenopodium quinoa]	RecName: Full=Putative AC transposase; AltName: Full=ORFA;	SubName: Full=Uncharacterized protein {ECO:0000313|EMBL:KNA05978.1}; Flags: Fragment;	Tam3-transposase (Ac family)	GO:0006310,DNA recombination; GO:0046983,protein dimerization activity; GO:0032196,transposition; GO:0003677,DNA binding	--
XLOC_032854	NW_018745000.1	5531999	5534489	+	--	ubiquitin receptor RAD23c-like [Chenopodium quinoa]	--	--	--	--	--
XLOC_007306	NW_018742733.1	1493560	1494034	.	--	--	--	--	--	--	--
XLOC_007349	NW_018742738.1	6911349	6914169	+	--	uncharacterized protein LOC110689061 [Chenopodium quinoa]	--	--	--	--	--
XLOC_017923	NW_018743608.1	670336	670878	.	--	uncharacterized protein LOC110721052 [Chenopodium quinoa]	--	--	--	--	--
XLOC_007419	NW_018742738.1	4161775	4162059	-	--	--	--	--	--	--	--
XLOC_021871	NW_018743955.1	705676	706499	-	--	--	--	--	--	--	--
XLOC_020357	NW_018743906.1	145061	149218	+	--	uncharacterized protein LOC110737764 [Chenopodium quinoa]	RecName: Full=F-box/LRR-repeat protein At3g48880;	SubName: Full=Uncharacterized protein {ECO:0000313|EMBL:OMO80474.1};	Leucine rich repeat proteins, some proteins contain F-box	--	F-box domain
XLOC_000763	NW_018742204.1	8158636	8159342	.	--	--	--	--	--	--	--
XLOC_011090	NW_018743021.1	64835	65672	.	--	hypothetical protein SOVF_089120 [Spinacia oleracea]	--	SubName: Full=Uncharacterized protein {ECO:0000313|EMBL:KNA16441.1};	--	--	--
XLOC_023710	NW_018744093.1	2003550	2004153	.	--	--	--	--	--	--	--
XLOC_024925	NW_018744239.1	7047051	7049753	+	--	--	--	--	--	--	--
XLOC_036466	NW_018745410.1	3927880	3928533	.	--	--	--	--	--	--	--
XLOC_018247	NW_018743669.1	1903317	1904170	+	--	--	--	--	--	--	--
XLOC_005862	NW_018742616.1	4472277	4477233	+	K03006 DNA-directed RNA polymerase II subunit RPB1 [EC:2.7.7.6] | (RefSeq) LOW QUALITY PROTEIN: DNA-directed RNA polymerase II subunit 1-like (A)	Retrovirus-related Pol polyprotein from transposon TNT 1-94, partial [Cajanus cajan]	RecName: Full=Retrovirus-related Pol polyprotein from transposon TNT 1-94; Includes: RecName: Full=Protease; EC=3.4.23.-; Includes: RecName: Full=Reverse transcriptase; EC=2.7.7.49; Includes: RecName: Full=Endonuclease;	SubName: Full=Retrovirus-related Pol polyprotein from transposon TNT 1-94 {ECO:0000313|EMBL:KYP64289.1}; Flags: Fragment;	FOG: Transposon-encoded proteins with TYA, reverse transcriptase, integrase domains in various combinations	GO:0004519,endonuclease activity; GO:0015074,DNA integration; GO:0004190,aspartic-type endopeptidase activity; GO:0008270,zinc ion binding; GO:0003676,nucleic acid binding; GO:0003964,RNA-directed DNA polymerase activity	--
XLOC_009632	NW_018742914.1	8067558	8068516	+	--	late embryogenesis abundant protein 2-like [Chenopodium quinoa]	--	SubName: Full=Late embryogenesis abundant protein (LEA) family protein {ECO:0000313|EMBL:KEH25233.1};	--	--	--
XLOC_034941	NW_018745177.1	2449099	2450122	.	--	uncharacterized protein LOC110701552 [Chenopodium quinoa]	--	--	--	--	--
XLOC_026228	NW_018744348.1	339116	343998	-	--	uncharacterized protein LOC110728323 [Chenopodium quinoa]	--	SubName: Full=Uncharacterized protein {ECO:0000313|EMBL:CCA65981.1};	FOG: Reverse transcriptase	--	--
XLOC_016553	NW_018743448.1	1675605	1675932	.	--	--	--	--	--	--	--
XLOC_010771	NW_018742987.1	1749887	1750295	.	K02108 F-type H+-transporting ATPase subunit a | (RefSeq) atpI, CP95_p079; ATP synthase CF0 subunit IV (A)	putative ATPase, F0 complex, subunit A [Helianthus annuus]	RecName: Full=ATP synthase subunit a, chloroplastic {ECO:0000255|HAMAP-Rule:MF_01393}; AltName: Full=ATP synthase F0 sector subunit a {ECO:0000255|HAMAP-Rule:MF_01393}; AltName: Full=F-ATPase subunit IV {ECO:0000255|HAMAP-Rule:MF_01393};	SubName: Full=Putative ATPase, F0 complex, subunit A {ECO:0000313|EMBL:OTF84602.1};	ATP synthase F0 subunit 6 and related proteins	GO:0009535,chloroplast thylakoid membrane; GO:0045263,proton-transporting ATP synthase complex, coupling factor F(o); GO:0016021,integral component of membrane; GO:0015986,ATP synthesis coupled proton transport; GO:0015078,proton transmembrane transporter activity	--
XLOC_003248	NW_018742415.1	1064395	1065568	.	--	--	--	--	--	--	--
XLOC_038723	NW_018745650.1	1208763	1209153	.	--	--	--	--	--	--	--
XLOC_014416	NW_018743285.1	3439768	3441075	-	--	--	--	--	--	--	--
XLOC_000779	NW_018742204.1	13701714	13703665	.	K17767 AH receptor-interacting protein | (RefSeq) peptidyl-prolyl cis-trans isomerase FKBP62-like (A)	uncharacterized protein LOC110714482 [Chenopodium quinoa]	RecName: Full=Peptidyl-prolyl cis-trans isomerase FKBP62; Short=PPIase FKBP62; EC=5.2.1.8; AltName: Full=70 kDa peptidyl-prolyl isomerase; AltName: Full=FK506-binding protein 62; Short=AtFKBP62; AltName: Full=Immunophilin FKBP62; AltName: Full=Peptidylprolyl isomerase ROF1; AltName: Full=Protein ROTAMASE FKBP 1; AltName: Full=Rotamase;	SubName: Full=Uncharacterized protein {ECO:0000313|EMBL:KNA07995.1};	FKBP-type peptidyl-prolyl cis-trans isomerase	GO:0005737,cytoplasm; GO:0005634,nucleus; GO:0005528,FK506 binding; GO:0005516,calmodulin binding; GO:0003755,peptidyl-prolyl cis-trans isomerase activity; GO:0061077,chaperone-mediated protein folding; GO:0070370,cellular heat acclimation	--
XLOC_027845	NW_018744577.1	34112	35674	.	--	--	--	--	--	--	--
XLOC_010858	NW_018743014.1	828170	829276	.	--	uncharacterized protein LOC110715465 [Chenopodium quinoa]	--	SubName: Full=Uncharacterized protein {ECO:0000313|EMBL:CAN64915.1};	--	--	--
XLOC_035810	NW_018745291.1	1394088	1394480	.	--	uncharacterized protein LOC110724922 [Chenopodium quinoa]	--	--	--	--	--
XLOC_000777	NW_018742204.1	13163240	13163491	.	--	--	--	--	--	--	--
XLOC_033833	NW_018745024.1	8243919	8244186	.	--	--	--	--	--	--	--
XLOC_021684	NW_018743946.1	2253971	2254703	-	K23541 Ca2+/H+ antiporter, TMEM165/GDT1 family | (RefSeq) GDT1-like protein 4 (A)	uncharacterized protein LOC110713034 [Chenopodium quinoa]	RecName: Full=Putative AC9 transposase;	SubName: Full=zinc finger BED domain-containing protein RICESLEEPER 2-like {ECO:0000313|RefSeq:XP_008779859.1};	Tam3-transposase (Ac family)	GO:0006310,DNA recombination; GO:0046983,protein dimerization activity; GO:0032196,transposition; GO:0003677,DNA binding	--
XLOC_010410	NW_018742969.1	693698	694705	.	--	--	--	--	--	--	--
XLOC_016812	NW_018743510.1	1942269	1944935	.	--	uncharacterized protein LOC110704658 [Chenopodium quinoa]	--	SubName: Full=Uncharacterized protein {ECO:0000313|EMBL:KNA05820.1};	FOG: Transposon-encoded proteins with TYA, reverse transcriptase, integrase domains in various combinations	GO:0003676,nucleic acid binding	--
XLOC_023504	NW_018744092.1	739313	743258	-	--	quinone oxidoreductase PIG3-like [Chenopodium quinoa]	--	SubName: Full=Uncharacterized protein {ECO:0000313|EMBL:KDO75778.1};	Zinc-binding oxidoreductase	GO:0016491,oxidoreductase activity	--
XLOC_018466	NW_018743691.1	3819446	3819989	+	--	--	--	--	--	--	--
XLOC_007673	NW_018742770.1	2499426	2500461	+	--	hypothetical protein SOVF_013010 [Spinacia oleracea]	--	SubName: Full=Uncharacterized protein {ECO:0000313|EMBL:KNA24766.1};	--	--	--
XLOC_004458	NW_018742476.1	14452	15236	.	--	--	--	--	--	--	--
XLOC_038842	NW_018745666.1	361813	362106	.	--	uncharacterized protein LOC110722582 [Chenopodium quinoa]	--	--	--	--	Lymphocyte activation family X
XLOC_032102	NW_018744949.1	2112683	2113400	.	--	--	--	--	--	--	--
XLOC_022315	NW_018743979.1	2468855	2469195	.	--	--	--	--	--	--	--
XLOC_016597	NW_018743476.1	1819423	1820493	.	--	--	--	--	--	--	--
XLOC_001291	NW_018742205.1	5251290	5252615	.	--	hypothetical protein SOVF_203680 [Spinacia oleracea]	--	SubName: Full=Uncharacterized protein {ECO:0000313|EMBL:KNA04010.1};	--	--	--
XLOC_007317	NW_018742733.1	3155800	3156273	.	--	--	--	--	--	--	--
XLOC_029219	NW_018744633.1	3753384	3754009	-	K15376 gephyrin [EC:2.10.1.1 2.7.7.75] | (RefSeq) molybdopterin biosynthesis protein CNX1 (A)	putative mediator of RNA polymerase II transcription subunit 1 [Spinacia oleracea]	--	SubName: Full=Uncharacterized protein {ECO:0000313|EMBL:KNA13891.1};	--	GO:0016021,integral component of membrane	--
XLOC_000677	NW_018742204.1	21888675	21889447	-	--	--	--	--	--	--	--
XLOC_022356	NW_018743987.1	609193	611847	-	--	uncharacterized protein LOC110693307 [Chenopodium quinoa]	--	--	--	--	--
XLOC_001952	NW_018742271.1	425436	426372	-	--	--	--	--	--	--	--
XLOC_036366	NW_018745409.1	45220	46092	.	--	--	--	--	--	--	--
XLOC_007533	NW_018742738.1	14068854	14069510	.	--	--	--	--	--	--	--
XLOC_014722	NW_018743292.1	8000234	8001993	+	--	--	--	--	--	--	--
XLOC_037955	NW_018745523.1	997295	997963	.	--	uncharacterized protein LOC110691351 [Chenopodium quinoa]	--	SubName: Full=Uncharacterized protein {ECO:0000313|EMBL:KNA15232.1};	--	GO:0004523,RNA-DNA hybrid ribonuclease activity; GO:0003676,nucleic acid binding	Reverse transcriptase-like
XLOC_009732	NW_018742914.1	4227484	4230275	-	--	uncharacterized protein LOC110707921 isoform X1 [Chenopodium quinoa]	--	SubName: Full=Fgenesh protein 21 {ECO:0000313|EMBL:ABD83280.1};	--	--	--
XLOC_027856	NW_018744582.1	255714	258031	+	K06943 nucleolar GTP-binding protein | (RefSeq) uncharacterized protein LOC108835530 (A)	uncharacterized protein LOC110693390 [Chenopodium quinoa]	RecName: Full=Putative ribonuclease H protein At1g65750; EC=3.1.26.4;	SubName: Full=Uncharacterized protein {ECO:0000313|EMBL:CCA66009.1};	FOG: Reverse transcriptase	GO:0046872,metal ion binding; GO:0004523,RNA-DNA hybrid ribonuclease activity; GO:0003676,nucleic acid binding	CCDC81 eukaryotic HU domain 2
XLOC_000809	NW_018742204.1	19371930	19372926	.	--	hypothetical protein BVRB_6g139800 [Beta vulgaris subsp. vulgaris]	--	SubName: Full=Uncharacterized protein {ECO:0000313|EMBL:KNA19688.1};	--	GO:0016021,integral component of membrane	--
XLOC_010801	NW_018743014.1	1574790	1575164	+	--	--	--	--	--	--	--
XLOC_002536	NW_018742345.1	8340698	8341793	-	--	--	--	--	--	--	--
XLOC_031180	NW_018744858.1	1809095	1809882	.	--	--	--	--	--	--	--
XLOC_031683	NW_018744878.1	932334	934628	-	--	--	--	--	--	--	--
XLOC_025130	NW_018744239.1	2547526	2547947	.	K00660 chalcone synthase [EC:2.3.1.74] | (RefSeq) chalcone synthase 2-like (A)	uncharacterized protein LOC110694843 [Chenopodium quinoa]	RecName: Full=Retrovirus-related Pol polyprotein from transposon RE1; AltName: Full=Retro element 1 {ECO:0000303|PubMed:10689195}; Short=AtRE1 {ECO:0000303|PubMed:10689195}; Includes: RecName: Full=Protease RE1; EC=3.4.23.-; Includes: RecName: Full=Reverse transcriptase RE1; EC=2.7.7.49; Includes: RecName: Full=Endonuclease RE1;	SubName: Full=Putative ribonuclease H-like domain-containing protein {ECO:0000313|EMBL:OTG33036.1};	FOG: Transposon-encoded proteins with TYA, reverse transcriptase, integrase domains in various combinations	GO:0006310,DNA recombination; GO:0004519,endonuclease activity; GO:0015074,DNA integration; GO:0004190,aspartic-type endopeptidase activity; GO:0003676,nucleic acid binding; GO:0003964,RNA-directed DNA polymerase activity; GO:0046872,metal ion binding	--
XLOC_025633	NW_018744297.1	1255790	1260428	+	--	uncharacterized protein LOC110711964 [Chenopodium quinoa]	--	SubName: Full=Uncharacterized protein {ECO:0000313|EMBL:KNA12850.1};	--	--	--
XLOC_029366	NW_018744633.1	4213629	4213908	.	--	uncharacterized protein LOC110729970 [Chenopodium quinoa]	--	--	--	--	--
XLOC_013759	NW_018743212.1	2370373	2370680	.	--	--	--	--	--	--	--
XLOC_028057	NW_018744582.1	2669803	2670251	.	--	uncharacterized protein LOC110710822 [Chenopodium quinoa]	--	SubName: Full=Uncharacterized protein {ECO:0000313|EMBL:KNA15232.1};	--	GO:0004523,RNA-DNA hybrid ribonuclease activity; GO:0003676,nucleic acid binding	--
XLOC_017761	NW_018743574.1	2604794	2605011	.	--	--	--	--	--	--	--
XLOC_018609	NW_018743697.1	1506623	1508980	+	--	uncharacterized protein LOC110684099 [Chenopodium quinoa]	--	SubName: Full=Uncharacterized protein {ECO:0000313|EMBL:KNA21709.1};	--	GO:0016021,integral component of membrane	--
XLOC_010310	NW_018742966.1	997408	998680	-	--	--	--	--	--	--	--
XLOC_013757	NW_018743212.1	715700	716141	.	--	--	--	--	--	--	HSV U79 / HCMV P34
XLOC_028059	NW_018744583.1	101385	105347	+	K08867 WNK lysine deficient protein kinase [EC:2.7.11.1] | (RefSeq) probable serine/threonine-protein kinase WNK10 (A)	probable serine/threonine-protein kinase WNK10 [Chenopodium quinoa]	--	SubName: Full=ergosterol biosynthetic protein 28 {ECO:0000313|RefSeq:XP_008798884.1};	--	--	--
XLOC_030995	NW_018744835.1	218847	221396	.	K19613 leucine-rich repeat protein SHOC2 | (RefSeq) LRR and NB-ARC domain disease resistance protein, putative (A)	putative disease resistance protein RGA4 [Chenopodium quinoa]	RecName: Full=Putative disease resistance RPP13-like protein 1;	SubName: Full=Uncharacterized protein {ECO:0000313|EMBL:KNA22030.1};	Apoptotic ATPase	GO:0005886,plasma membrane; GO:0007165,signal transduction; GO:0005524,ATP binding; GO:0043531,ADP binding; GO:0009626,plant-type hypersensitive response	Leucine Rich repeats (2 copies)
XLOC_021434	NW_018743920.1	5116493	5117004	.	--	--	--	--	--	--	--
XLOC_004401	NW_018742461.1	582368	583023	.	--	--	--	--	--	--	--
XLOC_009696	NW_018742914.1	2432455	2436059	-	K19984 exocyst complex component 5 | (RefSeq) uncharacterized protein LOC113272286 (A)	hypothetical protein SOVF_055050 [Spinacia oleracea]	RecName: Full=Putative AC transposase; AltName: Full=ORFA;	SubName: Full=Uncharacterized protein {ECO:0000313|EMBL:KNA20152.1};	Tam3-transposase (Ac family)	GO:0006310,DNA recombination; GO:0046983,protein dimerization activity; GO:0032196,transposition; GO:0003677,DNA binding	hAT family C-terminal dimerisation region
XLOC_039006	NW_018745684.1	2930680	2933628	+	K06943 nucleolar GTP-binding protein | (RefSeq) uncharacterized protein LOC108835530 (A)	PREDICTED: uncharacterized protein LOC104905588 [Beta vulgaris subsp. vulgaris]	RecName: Full=Putative ribonuclease H protein At1g65750; EC=3.1.26.4;	SubName: Full=Uncharacterized protein {ECO:0000313|EMBL:CCA66054.1};	FOG: Reverse transcriptase	GO:0046872,metal ion binding; GO:0004523,RNA-DNA hybrid ribonuclease activity; GO:0003676,nucleic acid binding	--
XLOC_021704	NW_018743946.1	1059770	1060129	.	--	--	--	--	--	--	--
XLOC_001963	NW_018742275.1	612890	614153	+	--	hypothetical protein SOVF_074060 [Spinacia oleracea]	--	SubName: Full=Uncharacterized protein {ECO:0000313|EMBL:KNA18089.1};	--	--	--
XLOC_014739	NW_018743292.1	8735387	8737683	+	--	--	--	--	--	--	--
XLOC_006208	NW_018742651.1	1721774	1727696	+	K10999 cellulose synthase A [EC:2.4.1.12] | (RefSeq) cellulose synthase A catalytic subunit 6 [UDP-forming]-like (A)	cellulose synthase A catalytic subunit 6 [UDP-forming]	RecName: Full=Cellulose synthase A catalytic subunit 6 [UDP-forming]; Short=AtCesA6; EC=2.4.1.12; AltName: Full=AraxCelA; AltName: Full=Isoxaben-resistant protein 2; AltName: Full=Protein PROCUSTE 1; AltName: Full=Protein QUILL;	SubName: Full=Cellulose synthase A catalytic subunit 6 [UDP-forming] {ECO:0000313|EMBL:KYP50578.1}; Flags: Fragment;	--	GO:0005794,Golgi apparatus; GO:0009825,multidimensional cell growth; GO:0009833,plant-type primary cell wall biogenesis; GO:0010330,cellulose synthase complex; GO:0016020,membrane; GO:0030244,cellulose biosynthetic process; GO:0071555,cell wall organization; GO:0016760,cellulose synthase (UDP-forming) activity; GO:0005887,integral component of plasma membrane; GO:0005886,plasma membrane; GO:00167…	--
XLOC_015348	NW_018743292.1	12109324	12109860	.	--	--	--	--	--	--	--
XLOC_005415	NW_018742564.1	234432	234840	.	--	--	--	--	--	--	--
XLOC_022826	NW_018744066.1	1405630	1410338	+	K00844 hexokinase [EC:2.7.1.1] | (RefSeq) hexokinase-2-like (A)	hypothetical protein SOVF_169550 isoform A, partial [Spinacia oleracea]	--	SubName: Full=Uncharacterized protein {ECO:0000313|EMBL:KNA07585.1}; Flags: Fragment;	--	--	NUP50 (Nucleoporin 50 kDa)
XLOC_030818	NW_018744821.1	2697378	2697857	.	--	--	--	--	--	--	--
XLOC_032808	NW_018744996.1	383973	384357	.	--	uncharacterized protein LOC110736825 [Chenopodium quinoa]	--	--	--	--	--
XLOC_035052	NW_018745203.1	21087	21725	.	K11650 SWI/SNF-related matrix-associated actin-dependent regulator of chromatin subfamily D | (RefSeq) SWI/SNF complex component SNF12 homolog (A)	uncharacterized protein LOC110775174 [Spinacia oleracea]	RecName: Full=Putative ribonuclease H protein At1g65750; EC=3.1.26.4;	SubName: Full=Uncharacterized protein {ECO:0000313|EMBL:GAU10423.1};	FOG: Reverse transcriptase	GO:0046872,metal ion binding; GO:0004523,RNA-DNA hybrid ribonuclease activity; GO:0003676,nucleic acid binding	--
XLOC_034345	NW_018745080.1	2568998	2569788	.	--	uncharacterized protein LOC110724629 [Chenopodium quinoa]	--	SubName: Full=Uncharacterized protein {ECO:0000313|EMBL:KNA10484.1};	--	--	--
XLOC_019127	NW_018743783.1	2838391	2840493	-	--	uncharacterized protein LOC110737501 isoform X2 [Chenopodium quinoa]	--	--	--	--	--
XLOC_001508	NW_018742241.1	950935	953268	.	K00815 tyrosine aminotransferase [EC:2.6.1.5] | (RefSeq) probable aminotransferase TAT2 (A)	uncharacterized protein LOC110725072 [Chenopodium quinoa]	--	SubName: Full=Uncharacterized protein {ECO:0000313|EMBL:CCA66054.1};	FOG: Reverse transcriptase	GO:0003676,nucleic acid binding	--
XLOC_026544	NW_018744394.1	947047	948104	.	--	--	--	--	--	--	--
XLOC_021431	NW_018743920.1	4899282	4899897	.	--	uncharacterized protein LOC110804006 [Spinacia oleracea]	--	SubName: Full=Uncharacterized protein {ECO:0000313|EMBL:EOY27272.1};	--	--	--
XLOC_033467	NW_018745024.1	7193662	7195000	+	--	uncharacterized protein LOC110696344 [Chenopodium quinoa]	--	--	--	--	Domain of unknown function (DUF3244)
XLOC_002569	NW_018742346.1	269526	270398	.	--	--	--	--	--	--	--
XLOC_035828	NW_018745311.1	1687778	1688915	+	--	--	--	--	--	--	--
XLOC_022235	NW_018743977.1	2265428	2267053	.	K10398 kinesin family member 11 | (RefSeq) hypothetical protein (A)	zinc finger BED domain-containing protein RICESLEEPER 2-like isoform X1 [Chenopodium quinoa]	RecName: Full=Zinc finger BED domain-containing protein RICESLEEPER 2; AltName: Full=Transposase-like protein RICESLEEPER 2;	SubName: Full=Uncharacterized protein {ECO:0000313|EMBL:KNA11902.1};	Tam3-transposase (Ac family)	GO:0003700,DNA-binding transcription factor activity; GO:0005634,nucleus; GO:0009791,post-embryonic development; GO:0006357,regulation of transcription by RNA polymerase II; GO:0000977,RNA polymerase II regulatory region sequence-specific DNA binding; GO:0046983,protein dimerization activity; GO:0046872,metal ion binding; GO:0006351,transcription, DNA-templated	--
XLOC_017764	NW_018743574.1	3223487	3224340	.	--	hypothetical protein CICLE_v10027253mg [Citrus clementina]	--	SubName: Full=Uncharacterized protein {ECO:0000313|EMBL:ESR39524.1};	--	--	--
XLOC_029689	NW_018744662.1	2071341	2071679	.	K14400 pre-mRNA cleavage complex 2 protein Pcf11 | (RefSeq) LOW QUALITY PROTEIN: uncharacterized protein LOC111982967 (A)	serine/threonine-protein phosphatase 7 long form homolog [Chenopodium quinoa]	RecName: Full=Serine/threonine-protein phosphatase 7 long form homolog; EC=3.1.3.16; AltName: Full=Protein MAIN-LIKE 3 {ECO:0000303|PubMed:24635680};	SubName: Full=Uncharacterized protein {ECO:0000313|EMBL:ESQ30762.1};	--	GO:0005634,nucleus; GO:0046872,metal ion binding; GO:0004721,phosphoprotein phosphatase activity	--
XLOC_004481	NW_018742483.1	922657	923598	-	--	uncharacterized protein LOC110713440 [Chenopodium quinoa]	--	SubName: Full=Uncharacterized protein {ECO:0000313|EMBL:KMS85024.1}; Flags: Fragment;	--	--	--
XLOC_009729	NW_018742914.1	4126550	4126841	-	--	--	--	--	--	--	--
XLOC_029337	NW_018744633.1	7045034	7045651	-	K14411 RNA-binding protein Musashi | (RefSeq) RNA-binding protein Musashi homolog Rbp6-like (A)	RNA-binding protein Musashi homolog Rbp6-like [Chenopodium quinoa]	--	--	--	--	--
XLOC_003754	NW_018742418.1	5013196	5013820	.	--	--	--	--	--	--	--
XLOC_004905	NW_018742487.1	399242	402681	-	--	--	--	--	--	--	--
XLOC_004828	NW_018742484.1	7573681	7575692	-	--	uncharacterized protein LOC110722670 [Chenopodium quinoa]	--	SubName: Full=Uncharacterized protein {ECO:0000313|EMBL:KNA18866.1};	--	GO:0016021,integral component of membrane	--
XLOC_023125	NW_018744072.1	1928922	1930759	.	K07393 glutathionyl-hydroquinone reductase [EC:1.8.5.7] | (RefSeq) uncharacterized protein LOC110775499 (A)	gag/pol polyprotein, partial [Trifolium pratense]	RecName: Full=RNA-directed DNA polymerase homolog; EC=2.7.7.48; AltName: Full=Reverse transcriptase homolog;	SubName: Full=Transposon Ty3-G Gag-Pol polyprotein {ECO:0000313|EMBL:KYP60416.1}; Flags: Fragment;	FOG: Transposon-encoded proteins with TYA, reverse transcriptase, integrase domains in various combinations	GO:0003964,RNA-directed DNA polymerase activity; GO:0003968,RNA-directed 5'-3' RNA polymerase activity; GO:0005739,mitochondrion	--
XLOC_005638	NW_018742584.1	43993	46829	-	K07374 tubulin alpha | (RefSeq) tubulin alpha-4 chain-like (A)	molybdate-anion transporter [Spinacia oleracea]	--	SubName: Full=Uncharacterized protein {ECO:0000313|EMBL:KNA19709.1};	Predicted sugar transporter	GO:0016021,integral component of membrane; GO:0015098,molybdate ion transmembrane transporter activity	--
XLOC_009868	NW_018742914.1	4129797	4130359	.	--	--	--	--	--	--	--
XLOC_003118	NW_018742410.1	922450	924770	+	--	uncharacterized protein LOC110733732 [Chenopodium quinoa]	--	SubName: Full=Uncharacterized protein {ECO:0000313|EMBL:KNA24836.1};	--	--	--
XLOC_002179	NW_018742309.1	5931206	5931766	.	--	hypothetical protein BRADI_5g23852v3 [Brachypodium distachyon]	--	SubName: Full=Uncharacterized protein {ECO:0000313|EMBL:AAW82556.1};	--	GO:0016021,integral component of membrane; GO:0009507,chloroplast	--
XLOC_001296	NW_018742205.1	5991376	5991944	.	--	--	--	--	--	--	--
XLOC_035222	NW_018745251.1	3161118	3161345	.	--	PREDICTED: uncharacterized protein LOC107261652 [Ricinus communis]	--	SubName: Full=Uncharacterized protein {ECO:0000313|EnsemblPlants:HORVU2Hr1G062160.2};	--	--	--
XLOC_008876	NW_018742879.1	2093547	2094328	.	--	protein ENDOSPERM DEFECTIVE 1-like [Chenopodium quinoa]	--	SubName: Full=Uncharacterized protein {ECO:0000313|EMBL:KNA23904.1};	--	--	--
XLOC_008373	NW_018742815.1	1527065	1528624	-	--	--	--	--	--	--	--
XLOC_022989	NW_018744066.1	1623700	1624025	.	K22378 E3 ubiquitin-protein ligase RNF181 [EC:2.3.2.27] | (RefSeq) E3 ubiquitin-protein ligase RNF181-like (A)	hypothetical protein SOVF_188010 [Spinacia oleracea]	RecName: Full=E3 ubiquitin-protein ligase SIRP1 {ECO:0000305}; EC=2.3.2.27 {ECO:0000269|PubMed:27118216}; AltName: Full=Salt-induced RING finger protein 1 {ECO:0000303|PubMed:27118216}; Short=OsSIRP1 {ECO:0000303|PubMed:27118216};	SubName: Full=Uncharacterized protein {ECO:0000313|EMBL:KNA05681.1};	FOG: Predicted E3 ubiquitin ligase	GO:0005737,cytoplasm; GO:0043161,proteasome-mediated ubiquitin-dependent protein catabolic process; GO:0042787,NA; GO:0046872,metal ion binding; GO:0061630,ubiquitin protein ligase activity; GO:0000209,protein polyubiquitination	Ring finger domain
XLOC_017071	NW_018743555.1	730453	744747	+	K19199 histone-lysine N-methyltransferase SETD3 [EC:2.1.1.43] | (RefSeq) uncharacterized protein LOC110684701 (A)	uncharacterized protein LOC110696788 [Chenopodium quinoa]	--	--	--	--	--
XLOC_030327	NW_018744718.1	203566	204690	-	--	hypothetical protein SOVF_064040 [Spinacia oleracea]	--	SubName: Full=Uncharacterized protein {ECO:0000313|EMBL:KNA19167.1};	--	--	--
XLOC_034955	NW_018745188.1	410374	411320	-	--	--	--	--	--	--	--
XLOC_021706	NW_018743946.1	2025281	2026038	.	--	--	--	--	--	--	--
XLOC_017813	NW_018743575.1	1196813	1197091	.	--	--	--	--	--	--	--
XLOC_038788	NW_018745652.1	15218	15676	.	--	--	--	--	--	--	--
XLOC_022390	NW_018743992.1	121	2123	+	--	uncharacterized protein LOC110710062 [Chenopodium quinoa]	--	SubName: Full=Uncharacterized protein {ECO:0000313|EMBL:KNA10600.1};	--	GO:0005506,iron ion binding; GO:0016021,integral component of membrane	Exoribonuclease 1 Domain-3
XLOC_003756	NW_018742418.1	5251861	5252216	.	--	hypothetical protein COLO4_13821 [Corchorus olitorius]	--	SubName: Full=Uncharacterized protein {ECO:0000313|EMBL:OMO98543.1};	--	--	--
XLOC_021617	NW_018743943.1	678204	692993	-	--	--	--	--	--	--	VID27 N-terminal region
XLOC_036470	NW_018745410.1	6434588	6435701	.	--	--	--	--	--	--	--
XLOC_034002	NW_018745063.1	2673350	2674224	-	--	--	--	--	--	--	--
XLOC_014076	NW_018743252.1	11129390	11133316	-	--	uncharacterized protein LOC110724903 isoform X1 [Chenopodium quinoa]	--	SubName: Full=Uncharacterized protein {ECO:0000313|EMBL:KNA22499.1};	--	--	Aldo/keto reductase family
XLOC_012816	NW_018743196.1	2367329	2368088	.	K03283 heat shock 70kDa protein 1/2/6/8 | (RefSeq) heat shock 70 kDa protein-like (A)	PREDICTED: uncharacterized protein LOC109135189 [Beta vulgaris subsp. vulgaris]	RecName: Full=Putative ribonuclease H protein At1g65750; EC=3.1.26.4;	SubName: Full=Putative ribonuclease H protein {ECO:0000313|EMBL:JAU15471.1}; Flags: Fragment;	FOG: Reverse transcriptase	GO:0046872,metal ion binding; GO:0004523,RNA-DNA hybrid ribonuclease activity; GO:0003676,nucleic acid binding	--
XLOC_039507	NW_018745684.1	4357949	4358288	.	--	PKS-NRPS hybrid synthetase CHGG_01239-like [Chenopodium quinoa]	--	SubName: Full=Uncharacterized protein {ECO:0000313|EMBL:OMO51093.1};	--	--	--
XLOC_017722	NW_018743574.1	7785453	7789636	-	K11866 STAM-binding protein [EC:3.4.19.12] | (RefSeq) probable ubiquitin thioesterase DG1039 (A)	zinc finger BED domain-containing protein RICESLEEPER 2-like [Spinacia oleracea]	RecName: Full=Putative AC transposase; AltName: Full=ORFA;	SubName: Full=Transposase {ECO:0000313|EMBL:AGH20188.1};	Tam3-transposase (Ac family)	GO:0006310,DNA recombination; GO:0046983,protein dimerization activity; GO:0032196,transposition; GO:0003677,DNA binding	hAT family C-terminal dimerisation region
XLOC_003259	NW_018742418.1	807807	808534	+	--	uncharacterized protein LOC110694527 [Chenopodium quinoa]	RecName: Full=Transcription factor UPBEAT1; AltName: Full=Basic helix-loop-helix protein 151; Short=AtbHLH151; Short=bHLH 151; AltName: Full=Transcription factor EN 146; AltName: Full=Transcription factor bHLH151; AltName: Full=bHLH transcription factor bHLH151;	SubName: Full=uncharacterized protein LOC108994311 {ECO:0000313|RefSeq:XP_018824995.1};	--	GO:0003700,DNA-binding transcription factor activity; GO:0005634,nucleus; GO:0030154,cell differentiation; GO:2000280,regulation of root development; GO:0006355,regulation of transcription, DNA-templated; GO:0006351,transcription, DNA-templated; GO:0003677,DNA binding; GO:0046983,protein dimerization activity	--
XLOC_029361	NW_018744633.1	2729564	2730515	.	--	hypothetical protein SOVF_009310 [Spinacia oleracea]	--	SubName: Full=Uncharacterized protein {ECO:0000313|EMBL:KNA25122.1};	--	--	--
XLOC_032202	NW_018744970.1	926841	927911	+	--	--	--	--	--	--	--
XLOC_036711	NW_018745448.1	9597988	9600496	+	--	SAC3 family protein B-like isoform X1 [Chenopodium quinoa]	--	SubName: Full=Uncharacterized protein {ECO:0000313|EMBL:KNA09027.1};	--	--	--
XLOC_002771	NW_018742385.1	895748	896602	-	--	zinc finger BED domain-containing protein RICESLEEPER 1-like [Spinacia oleracea]	--	SubName: Full=Uncharacterized protein {ECO:0000313|EMBL:KNA25031.1};	--	GO:0003677,DNA binding	--
XLOC_007574	NW_018742763.1	2185560	2187892	-	K17086 transmembrane 9 superfamily member 2/4 | (RefSeq) uncharacterized LOC101300290 (A)	uncharacterized protein LOC110725487 [Chenopodium quinoa]	--	SubName: Full=uncharacterized protein LOC106766018 {ECO:0000313|RefSeq:XP_014506267.1};	--	GO:0008270,zinc ion binding	--
XLOC_025932	NW_018744304.1	6766476	6767183	.	K03363 cell division cycle 20, cofactor of APC complex | (RefSeq) transducin family protein/WD-40 repeat protein (A)	uncharacterized protein LOC110420373 [Herrania umbratica]	--	SubName: Full=Uncharacterized protein {ECO:0000313|EMBL:KDO61094.1};	--	--	--
XLOC_023603	NW_018744092.1	5154039	5155191	-	--	uncharacterized protein LOC110692047 [Chenopodium quinoa]	--	--	--	--	--
XLOC_019699	NW_018743850.1	5590947	5591230	+	--	--	--	--	--	--	--
XLOC_009691	NW_018742914.1	1966942	1969508	-	K01873 valyl-tRNA synthetase [EC:6.1.1.9] | (RefSeq) valine--tRNA ligase, mitochondrial 1-like (A)	hypothetical protein SOVF_175770 [Spinacia oleracea]	--	SubName: Full=Uncharacterized protein {ECO:0000313|EMBL:KNA07017.1};	--	--	--
XLOC_002340	NW_018742329.1	7020686	7023943	-	--	uncharacterized protein LOC110685527 [Chenopodium quinoa]	--	SubName: Full=Uncharacterized protein {ECO:0000313|EMBL:KNA17008.1};	--	GO:0016021,integral component of membrane	--
XLOC_023869	NW_018744113.1	209722	215131	-	--	--	--	--	--	--	--
XLOC_011750	NW_018743066.1	2065897	2067363	.	--	uncharacterized protein LOC110687357 [Chenopodium quinoa]	--	SubName: Full=Uncharacterized protein {ECO:0000313|EMBL:EXB53805.1};	--	--	--
XLOC_021619	NW_018743943.1	244079	244585	.	--	--	--	--	--	--	--
XLOC_002858	NW_018742390.1	630239	630468	.	--	--	--	--	--	--	--
XLOC_027324	NW_018744502.1	3364144	3366182	.	K06943 nucleolar GTP-binding protein | (RefSeq) uncharacterized protein LOC108835530 (A)	uncharacterized protein LOC110682830 [Chenopodium quinoa]	RecName: Full=Putative ribonuclease H protein At1g65750; EC=3.1.26.4;	SubName: Full=Uncharacterized protein {ECO:0000313|EMBL:CCA66020.1};	FOG: Reverse transcriptase	GO:0046872,metal ion binding; GO:0004523,RNA-DNA hybrid ribonuclease activity; GO:0003676,nucleic acid binding	--
XLOC_035533	NW_018745281.1	2153452	2154199	.	--	--	--	--	--	--	--
XLOC_012537	NW_018743175.1	4288778	4292301	-	--	--	--	--	--	--	--
XLOC_015305	NW_018743292.1	3925046	3925807	.	--	PREDICTED: uncharacterized protein LOC104890873 [Beta vulgaris subsp. vulgaris]	--	SubName: Full=Uncharacterized protein {ECO:0000313|EMBL:KNA04908.1};	--	GO:0003676,nucleic acid binding	--
XLOC_016248	NW_018743391.1	2562286	2562829	.	--	--	--	--	--	--	--
XLOC_022907	NW_018744066.1	448182	449665	-	--	--	--	--	--	--	--
XLOC_017908	NW_018743608.1	115503	120362	+	--	--	--	--	--	--	--
XLOC_027035	NW_018744497.1	579135	579630	.	--	--	--	--	--	--	--
XLOC_032453	NW_018744991.1	2887554	2888568	+	--	uncharacterized protein LOC110684731 isoform X1 [Chenopodium quinoa]	--	SubName: Full=Salt-induced S1 {ECO:0000313|EMBL:APW84883.1};	--	--	Protein of unknown function (DUF1668)
XLOC_026587	NW_018744427.1	1560	2704	-	--	uncharacterized protein LOC110696515 [Chenopodium quinoa]	--	--	--	--	--
XLOC_025760	NW_018744301.1	8039674	8044918	-	K01303 acylaminoacyl-peptidase [EC:3.4.19.1] | (RefSeq) uncharacterized LOC101311565 (A)	uncharacterized protein LOC110625565 [Manihot esculenta]	RecName: Full=RNA-directed DNA polymerase homolog; EC=2.7.7.48; AltName: Full=Reverse transcriptase homolog;	SubName: Full=DNA-directed DNA polymerase {ECO:0000313|EMBL:PIN21854.1}; EC=2.7.7.7 {ECO:0000313|EMBL:PIN21854.1};	FOG: Transposon-encoded proteins with TYA, reverse transcriptase, integrase domains in various combinations	GO:0003964,RNA-directed DNA polymerase activity; GO:0003968,RNA-directed 5'-3' RNA polymerase activity; GO:0005739,mitochondrion	Aspartyl protease
XLOC_038105	NW_018745533.1	2666741	2668766	-	--	--	--	--	--	--	--
XLOC_012174	NW_018743144.1	2678420	2680496	.	K10406 kinesin family member C2/C3 | (RefSeq) kinesin KP1-like isoform X1 (A)	uncharacterized protein LOC110737911 [Chenopodium quinoa]	--	SubName: Full=Uncharacterized protein {ECO:0000313|EMBL:KMS95355.1};	FOG: Reverse transcriptase	--	--
XLOC_018500	NW_018743691.1	2239756	2242755	-	--	replication protein A 70 kDa DNA-binding subunit A-like [Chenopodium quinoa]	--	--	--	--	--
XLOC_034490	NW_018745151.1	399478	408911	-	--	--	--	--	--	--	--
XLOC_003723	NW_018742418.1	729743	730379	.	--	uncharacterized protein LOC110689525 [Chenopodium quinoa]	--	SubName: Full=Uncharacterized protein {ECO:0000313|EMBL:KNA02870.1}; Flags: Fragment;	FOG: Reverse transcriptase	--	--
XLOC_000480	NW_018742204.1	11435838	11438251	-	--	--	--	--	--	--	--
XLOC_038708	NW_018745650.1	5135932	5137084	-	--	--	--	--	--	--	--
XLOC_036714	NW_018745448.1	9666372	9667567	+	--	uncharacterized protein LOC110718846 [Chenopodium quinoa]	--	--	--	--	--
XLOC_002774	NW_018742385.1	442793	443322	.	--	--	--	--	--	--	--
XLOC_014444	NW_018743287.1	1866	16135	-	--	Regulator of rDNA transcription protein 15 [Capsicum baccatum]	--	SubName: Full=Regulator of rDNA transcription protein 15 {ECO:0000313|EMBL:PHT26166.1};	--	--	--
XLOC_007993	NW_018742808.1	228214	229495	.	--	--	--	--	--	--	--
XLOC_006931	NW_018742726.1	664715	665662	+	--	--	--	--	--	--	--
XLOC_016651	NW_018743503.1	3217560	3218294	-	--	--	--	--	--	--	--
XLOC_014880	NW_018743292.1	848314	848612	-	--	biorientation of chromosomes in cell division protein 1-like 1 [Chenopodium quinoa]	--	--	--	--	--
XLOC_026477	NW_018744367.1	351272	352019	.	--	--	--	--	--	--	--
XLOC_001207	NW_018742205.1	5658506	5659316	-	K16055 trehalose 6-phosphate synthase/phosphatase [EC:2.4.1.15 3.1.3.12] | (RefSeq) alpha,alpha-trehalose-phosphate synthase [UDP-forming] 1-like isoform X1 (A)	alpha,alpha-trehalose-phosphate synthase [UDP-forming]	RecName: Full=Alpha,alpha-trehalose-phosphate synthase [UDP-forming] 1; EC=2.4.1.15; AltName: Full=Trehalose-6-phosphate synthase 1; Short=AtTPS1;	SubName: Full=Uncharacterized protein {ECO:0000313|EMBL:KNA06421.1};	Trehalose-6-phosphate synthase component TPS1 and related subunits	GO:0009832,plant-type cell wall biogenesis; GO:0016791,phosphatase activity; GO:0005618,cell wall; GO:0005992,trehalose biosynthetic process; GO:0005991,trehalose metabolic process; GO:0003825,alpha,alpha-trehalose-phosphate synthase (UDP-forming) activity; GO:0005773,vacuole; GO:0009793,embryo development ending in seed dormancy; GO:0005576,extracellular region; GO:0010182,sugar mediated signali…	--
XLOC_012078	NW_018743122.1	1108994	1109903	+	--	--	--	--	--	--	--
XLOC_024769	NW_018744167.1	2684072	2686655	-	K02995 small subunit ribosomal protein S8e | (RefSeq) 40S ribosomal protein S8 (A)	uncharacterized protein LOC110729516 [Chenopodium quinoa]	--	SubName: Full=Uncharacterized protein {ECO:0000313|EMBL:EXB72473.1};	--	GO:0046983,protein dimerization activity; GO:0003677,DNA binding	--
XLOC_002075	NW_018742306.1	104680	104895	.	--	--	--	--	--	--	--
XLOC_025388	NW_018744284.1	1248103	1248960	.	--	--	--	--	--	--	--
XLOC_025955	NW_018744311.1	463324	464772	+	K00558 DNA (cytosine-5)-methyltransferase 1 [EC:2.1.1.37] | (RefSeq) LOW QUALITY PROTEIN: DNA (cytosine-5)-methyltransferase CMT3-like (A)	PREDICTED: uncharacterized protein LOC18589643 [Theobroma cacao]	--	SubName: Full=Uncharacterized protein {ECO:0000313|EMBL:EOY32380.1};	--	GO:0016021,integral component of membrane; GO:0006979,response to oxidative stress	Predicted membrane protein (DUF2157)
XLOC_008523	NW_018742817.1	394306	395306	-	--	--	--	--	--	--	Sec7 domain
XLOC_023118	NW_018744072.1	793135	794128	.	--	importin-11-like [Chenopodium quinoa]	--	SubName: Full=Uncharacterized protein {ECO:0000313|EMBL:KNA06350.1};	Nuclear transport receptor KAP120 (importin beta superfamily)	GO:0006886,intracellular protein transport; GO:0008536,Ran GTPase binding; GO:0005634,nucleus	--
XLOC_035856	NW_018745311.1	3095068	3095681	.	K02696 photosystem I subunit VIII | (RefSeq) psaI, SIC0616; PSI reaction center subunit VIII (A)	photosystem I subunit VIII (chloroplast) [Salicornia brachiata]	RecName: Full=Photosystem I reaction center subunit VIII {ECO:0000255|HAMAP-Rule:MF_00431}; Short=PSI-I {ECO:0000255|HAMAP-Rule:MF_00431};	RecName: Full=Photosystem I reaction center subunit VIII {ECO:0000256|SAAS:SAAS00400925};	--	GO:0009535,chloroplast thylakoid membrane; GO:0016021,integral component of membrane; GO:0009522,photosystem I; GO:0015979,photosynthesis	--
XLOC_032030	NW_018744909.1	3402	31621	-	--	--	--	--	--	--	Domain of unknown function (DUF4705)
XLOC_004275	NW_018742461.1	1558465	1564038	-	--	uncharacterized protein LOC110786498 [Spinacia oleracea]	RecName: Full=Translocase of chloroplast 34; EC=3.6.5.-; AltName: Full=34 kDa chloroplast outer envelope protein; AltName: Full=GTP-binding protein IAP34; AltName: Full=GTP-binding protein OEP34;	RecName: Full=Translocase of chloroplast {ECO:0000256|PIRNR:PIRNR038134}; EC=3.6.5.- {ECO:0000256|PIRNR:PIRNR038134};	--	GO:0016787,hydrolase activity; GO:0015450,P-P-bond-hydrolysis-driven protein transmembrane transporter activity; GO:0006886,intracellular protein transport; GO:0009707,chloroplast outer membrane; GO:0016021,integral component of membrane; GO:0042802,identical protein binding; GO:0005525,GTP binding	AIG1 family
XLOC_024222	NW_018744137.1	1039467	1039998	.	K12930 anthocyanidin 3-O-glucosyltransferase [EC:2.4.1.115] | (RefSeq) anthocyanidin 3-O-glucosyltransferase 7-like (A)	anthocyanidin 3-O-glucosyltransferase 7-like [Chenopodium quinoa]	RecName: Full=UDP-glycosyltransferase 78D2; EC=2.4.1.-; AltName: Full=Anthocyanin 3-O-glucosyltransferase; AltName: Full=Flavonol 3-O-glucosyltransferase; EC=2.4.1.91; AltName: Full=UDP glucose:flavonoid 3-O-glucosyltransferase;	RecName: Full=Glycosyltransferase {ECO:0000256|RuleBase:RU362057}; EC=2.4.1.- {ECO:0000256|RuleBase:RU362057};	UDP-glucuronosyl and UDP-glucosyl transferase	GO:0102425,myricetin 3-O-glucosyltransferase activity; GO:0080167,response to karrikin; GO:0035251,UDP-glucosyltransferase activity; GO:0047893,flavonol 3-O-glucosyltransferase activity; GO:0009813,flavonoid biosynthetic process; GO:0102360,daphnetin 3-O-glucosyltransferase activity; GO:0080043,quercetin 3-O-glucosyltransferase activity; GO:0080044,quercetin 7-O-glucosyltransferase activity; GO:0…	--
XLOC_026596	NW_018744445.1	51773	52539	-	--	ubiquitin-like-specific protease 1C [Chenopodium quinoa]	--	--	--	--	--
XLOC_019373	NW_018743812.1	85612	88979	+	--	--	--	--	--	--	--
XLOC_038089	NW_018745533.1	2117994	2119885	-	K03283 heat shock 70kDa protein 1/2/6/8 | (RefSeq) heat shock 70 kDa protein 18-like (A)	uncharacterized protein LOC110700735 [Chenopodium quinoa]	RecName: Full=Retrovirus-related Pol polyprotein from transposon RE1; AltName: Full=Retro element 1 {ECO:0000303|PubMed:10689195}; Short=AtRE1 {ECO:0000303|PubMed:10689195}; Includes: RecName: Full=Protease RE1; EC=3.4.23.-; Includes: RecName: Full=Reverse transcriptase RE1; EC=2.7.7.49; Includes: RecName: Full=Endonuclease RE1;	SubName: Full=uncharacterized protein LOC101515410 {ECO:0000313|RefSeq:XP_004514168.1};	FOG: Transposon-encoded proteins with TYA, reverse transcriptase, integrase domains in various combinations	GO:0006310,DNA recombination; GO:0004519,endonuclease activity; GO:0015074,DNA integration; GO:0004190,aspartic-type endopeptidase activity; GO:0003676,nucleic acid binding; GO:0003964,RNA-directed DNA polymerase activity; GO:0046872,metal ion binding	gag-polypeptide of LTR copia-type
XLOC_001246	NW_018742205.1	7614808	7627820	-	--	hypothetical protein BVRB_4g089410 [Beta vulgaris subsp. vulgaris]	--	SubName: Full=Uncharacterized protein {ECO:0000313|EMBL:KNA20515.1};	--	--	--
XLOC_008865	NW_018742879.1	3692507	3694398	-	--	--	--	--	--	--	--
XLOC_004856	NW_018742484.1	2348311	2349790	.	K08235 xyloglucan:xyloglucosyl transferase [EC:2.4.1.207] | (RefSeq) probable xyloglucan endotransglucosylase/hydrolase protein 28 (A)	uncharacterized protein LOC110797976 [Spinacia oleracea]	RecName: Full=Putative ribonuclease H protein At1g65750; EC=3.1.26.4;	SubName: Full=Uncharacterized protein {ECO:0000313|EMBL:CCA65981.1};	FOG: Reverse transcriptase	GO:0046872,metal ion binding; GO:0004523,RNA-DNA hybrid ribonuclease activity; GO:0003676,nucleic acid binding	--
XLOC_010415	NW_018742969.1	899635	900001	.	--	hypothetical protein SOVF_191770 [Spinacia oleracea]	--	SubName: Full=Uncharacterized protein {ECO:0000313|EMBL:KNA05293.1};	--	GO:0016021,integral component of membrane	--
XLOC_007890	NW_018742770.1	2931945	2932465	.	K02183 calmodulin | (RefSeq) LOC109751263; calmodulin-1-like (A)	hypothetical protein SOVF_173210 [Spinacia oleracea]	RecName: Full=Calmodulin-like protein 10; AltName: Full=22 kDa calmodulin-like calcium-binding protein; AltName: Full=CABP-22;	SubName: Full=Uncharacterized protein {ECO:0000313|EMBL:KNA07300.1};	Calmodulin and related proteins (EF-Hand superfamily)	GO:0005737,cytoplasm; GO:0034599,cellular response to oxidative stress; GO:0005509,calcium ion binding; GO:2000082,regulation of L-ascorbic acid biosynthetic process	--
XLOC_031029	NW_018744845.1	801590	803120	.	--	--	--	--	--	--	--
XLOC_017859	NW_018743593.1	767686	777486	-	K01303 acylaminoacyl-peptidase [EC:3.4.19.1] | (RefSeq) uncharacterized LOC101311565 (A)	LOW QUALITY PROTEIN: uncharacterized protein LOC110711169 [Chenopodium quinoa]	RecName: Full=Uncharacterized mitochondrial protein AtMg00860; AltName: Full=ORF158;	SubName: Full=Uncharacterized protein {ECO:0000313|EMBL:KOM35206.1};	FOG: Transposon-encoded proteins with TYA, reverse transcriptase, integrase domains in various combinations	GO:0005739,mitochondrion	--
XLOC_017775	NW_018743574.1	6256898	6257402	.	K14400 pre-mRNA cleavage complex 2 protein Pcf11 | (RefSeq) LOW QUALITY PROTEIN: uncharacterized protein LOC111982967 (A)	serine/threonine-protein phosphatase 7 long form homolog [Chenopodium quinoa]	RecName: Full=Serine/threonine-protein phosphatase 7 long form homolog; EC=3.1.3.16; AltName: Full=Protein MAIN-LIKE 3 {ECO:0000303|PubMed:24635680};	SubName: Full=Uncharacterized protein {ECO:0000313|EMBL:CAN81676.1};	--	GO:0005634,nucleus; GO:0046872,metal ion binding; GO:0004721,phosphoprotein phosphatase activity	--
XLOC_031172	NW_018744858.1	194861	195895	.	--	--	--	--	--	--	--
XLOC_027063	NW_018744498.1	1484497	1484839	.	--	uncharacterized protein LOC110698385 [Chenopodium quinoa]	--	--	--	--	--
XLOC_033085	NW_018745003.1	4125309	4125756	+	--	--	--	--	--	--	--
XLOC_029691	NW_018744662.1	2792452	2793388	.	K14411 RNA-binding protein Musashi | (RefSeq) RNA-binding protein Musashi homolog Rbp6-like (A)	RNA-binding protein Musashi homolog Rbp6-like [Chenopodium quinoa]	--	--	--	--	--
XLOC_007324	NW_018742733.1	3499515	3500001	.	--	uncharacterized protein LOC110720691 [Chenopodium quinoa]	--	--	--	--	--
XLOC_001583	NW_018742244.1	1484094	1485149	+	--	succinate dehydrogenase assembly factor 4, mitochondrial [Chenopodium quinoa]	--	SubName: Full=Uncharacterized protein {ECO:0000313|EMBL:KNA11971.1};	Uncharacterized conserved protein	--	--
XLOC_019111	NW_018743783.1	639057	639634	-	--	--	--	--	--	--	--
XLOC_007538	NW_018742763.1	561916	562168	+	--	--	--	--	--	--	--
XLOC_024773	NW_018744167.1	103068	105010	.	--	uncharacterized protein LOC110724357 [Chenopodium quinoa]	--	--	--	--	--
XLOC_032883	NW_018745000.1	657712	659007	-	--	--	--	--	--	--	--
XLOC_002354	NW_018742329.1	561531	561773	.	K06943 nucleolar GTP-binding protein | (RefSeq) uncharacterized protein LOC108835530 (A)	uncharacterized protein LOC110688776 [Chenopodium quinoa]	--	SubName: Full=Uncharacterized protein {ECO:0000313|EMBL:JAU28902.1}; Flags: Fragment;	FOG: Reverse transcriptase	--	--
XLOC_025308	NW_018744268.1	4414158	4416907	+	--	--	--	--	--	--	--
XLOC_008556	NW_018742817.1	3168377	3169404	.	--	--	--	--	--	--	--
XLOC_011204	NW_018743033.1	117404	120138	-	--	uncharacterized protein LOC110693722 [Chenopodium quinoa]	--	SubName: Full=Uncharacterized protein {ECO:0000313|EMBL:KNA13199.1};	--	GO:0016021,integral component of membrane	--
XLOC_026245	NW_018744348.1	980408	981430	-	--	--	--	--	--	--	--
XLOC_000917	NW_018742205.1	2268135	2269402	+	K01872 alanyl-tRNA synthetase [EC:6.1.1.7] | (RefSeq) alanine--tRNA ligase-like (A)	alanine--tRNA ligase-like [Chenopodium quinoa]	RecName: Full=Alanine--tRNA ligase {ECO:0000255|HAMAP-Rule:MF_03133}; EC=6.1.1.7 {ECO:0000255|HAMAP-Rule:MF_03133}; AltName: Full=Alanyl-tRNA synthetase {ECO:0000255|HAMAP-Rule:MF_03133}; Short=AlaRS {ECO:0000255|HAMAP-Rule:MF_03133}; Flags: Precursor;	RecName: Full=Alanine--tRNA ligase {ECO:0000256|HAMAP-Rule:MF_03133}; EC=6.1.1.7 {ECO:0000256|HAMAP-Rule:MF_03133}; AltName: Full=Alanyl-tRNA synthetase {ECO:0000256|HAMAP-Rule:MF_03133}; Short=AlaRS {ECO:0000256|HAMAP-Rule:MF_03133};	Alanyl-tRNA synthetase	GO:0004813,alanine-tRNA ligase activity; GO:0000049,tRNA binding; GO:0005829,cytosol; GO:0005739,mitochondrion; GO:0006400,tRNA modification; GO:0006419,alanyl-tRNA aminoacylation; GO:0046686,response to cadmium ion; GO:0046872,metal ion binding; GO:0016597,amino acid binding; GO:0005524,ATP binding; GO:0009507,chloroplast	tRNA synthetases class II (A)
XLOC_020730	NW_018743919.1	967909	968870	.	--	hypothetical protein BVRB_8g186340 [Beta vulgaris subsp. vulgaris]	--	SubName: Full=Uncharacterized protein {ECO:0000313|EMBL:KMT04033.1};	--	GO:0016021,integral component of membrane	--
XLOC_036023	NW_018745323.1	2550017	2551308	-	--	hypothetical protein SOVF_125220 [Spinacia oleracea]	--	SubName: Full=Uncharacterized protein {ECO:0000313|EMBL:KNA12491.1};	--	--	--
XLOC_006295	NW_018742651.1	520977	521888	.	--	uncharacterized protein LOC110737558 [Chenopodium quinoa]	--	SubName: Full=Uncharacterized protein {ECO:0000313|EMBL:PKU87434.1};	--	--	--
XLOC_002821	NW_018742390.1	8419275	8421324	+	--	uncharacterized protein LOC110683657 [Chenopodium quinoa]	--	--	--	--	--
XLOC_016504	NW_018743448.1	2723618	2726885	+	--	uncharacterized protein LOC110682034 [Chenopodium quinoa]	--	SubName: Full=Uncharacterized protein {ECO:0000313|EMBL:KNA17427.1};	--	--	--
XLOC_021662	NW_018743946.1	388510	390927	-	--	hypothetical protein SOVF_045390 [Spinacia oleracea]	--	SubName: Full=Uncharacterized protein {ECO:0000313|EMBL:KNA21207.1};	--	--	--
XLOC_014112	NW_018743252.1	10769096	10770460	.	K14857 AdoMet-dependent rRNA methyltransferase SPB1 [EC:2.1.1.-] | (RefSeq) putative rRNA methyltransferase (A)	uncharacterized protein LOC110713414 [Chenopodium quinoa]	--	SubName: Full=Uncharacterized protein {ECO:0000313|EMBL:CCA66020.1};	FOG: Reverse transcriptase	GO:0003676,nucleic acid binding	--
XLOC_030766	NW_018744821.1	1768998	1773072	+	--	zinc finger BED domain-containing protein DAYSLEEPER-like [Chenopodium quinoa]	--	SubName: Full=Uncharacterized protein {ECO:0000313|EMBL:KNA13802.1};	Tam3-transposase (Ac family)	GO:0046983,protein dimerization activity; GO:0003677,DNA binding	--
XLOC_002738	NW_018742381.1	1976131	1976590	.	--	PREDICTED: CLAVATA3/ESR (CLE)-related protein 12-like [Beta vulgaris subsp. vulgaris]	RecName: Full=CLAVATA3/ESR (CLE)-related protein 13; Contains: RecName: Full=CLE13p; Flags: Precursor;	SubName: Full=Uncharacterized protein {ECO:0000313|EMBL:KMS97545.1};	--	GO:0048046,apoplast; GO:0005615,extracellular space; GO:0007275,multicellular organism development; GO:0045168,cell-cell signaling involved in cell fate commitment; GO:0033612,receptor serine/threonine kinase binding	--
XLOC_027264	NW_018744502.1	5341808	5346336	-	K22794 flavonol-3-O-glucoside/galactoside glucosyltransferase [EC:2.4.1.239 2.4.1.-] | (RefSeq) UDP-glycosyltransferase 79B30-like (A)	PREDICTED: uncharacterized protein LOC104887816 [Beta vulgaris subsp. vulgaris]	--	SubName: Full=Uncharacterized protein {ECO:0000313|EMBL:KNA19524.1};	FOG: Reverse transcriptase	GO:0004523,RNA-DNA hybrid ribonuclease activity; GO:0003676,nucleic acid binding; GO:0008270,zinc ion binding	--
XLOC_019114	NW_018743783.1	1005648	1008021	-	K08737 DNA mismatch repair protein MSH6 | (RefSeq) LOW QUALITY PROTEIN: DNA mismatch repair protein MSH6-like (A)	sialidase-like [Chenopodium quinoa]	--	SubName: Full=Uncharacterized protein {ECO:0000313|EMBL:KNA23443.1};	--	--	Tombusvirus P19 core protein
XLOC_013864	NW_018743252.1	2806730	2809001	+	K15382 solute carrier family 50 (sugar transporter) | (RefSeq) bidirectional sugar transporter SWEET4-like (A)	uncharacterized protein LOC110702385 [Chenopodium quinoa]	--	SubName: Full=Uncharacterized protein {ECO:0000313|EMBL:KNA09281.1}; Flags: Fragment;	--	--	Ulp1 protease family, C-terminal catalytic domain
XLOC_030355	NW_018744718.1	1158223	1158781	-	--	--	--	--	--	--	--
XLOC_006084	NW_018742630.1	1219944	1220261	-	K07178 RIO kinase 1 [EC:2.7.11.1] | (RefSeq) serine/threonine-protein kinase RIO1-like isoform X1 (A)	serine/threonine-protein kinase rio1-like isoform X2 [Chenopodium quinoa]	--	SubName: Full=Uncharacterized protein {ECO:0000313|EMBL:KNA07268.1};	Serine/threonine protein kinase involved in cell cycle control	GO:0004674,protein serine/threonine kinase activity; GO:0005524,ATP binding	--
XLOC_020092	NW_018743858.1	967636	968952	.	--	uncharacterized protein LOC110682697 [Chenopodium quinoa]	--	--	--	--	--
XLOC_001436	NW_018742238.1	1507366	1508251	-	--	--	--	--	--	--	--
XLOC_011186	NW_018743033.1	2420582	2422644	+	K13181 ATP-dependent RNA helicase DDX27 [EC:3.6.4.13] | (RefSeq) DEAD-box ATP-dependent RNA helicase 28-like (A)	tropomyosin-like [Chenopodium quinoa]	--	--	--	--	--
XLOC_001968	NW_018742275.1	604461	605298	.	--	hypothetical protein BVRB_7g160090 [Beta vulgaris subsp. vulgaris]	--	--	--	--	--
XLOC_030273	NW_018744718.1	2503654	2516305	+	--	Poly [ADP-ribose]	--	SubName: Full=Uncharacterized protein {ECO:0000313|EnsemblPlants:GSMUA_Achr3P10490_001};	--	--	--
XLOC_034440	NW_018745105.1	3890596	3891714	-	--	--	--	--	--	--	--
XLOC_030813	NW_018744821.1	950236	950496	.	--	uncharacterized protein LOC110729970 [Chenopodium quinoa]	--	--	--	--	--
XLOC_031878	NW_018744887.1	1313590	1314686	+	--	--	--	--	--	--	--
XLOC_025082	NW_018744239.1	8398574	8399854	-	--	--	--	--	--	--	--
XLOC_036126	NW_018745324.1	1516842	1517700	.	--	--	--	--	--	--	--
XLOC_009500	NW_018742914.1	1960722	1968329	+	K01873 valyl-tRNA synthetase [EC:6.1.1.9] | (RefSeq) valine--tRNA ligase, mitochondrial 1-like (A)	hypothetical protein SOVF_175770 [Spinacia oleracea]	--	SubName: Full=Uncharacterized protein {ECO:0000313|EMBL:KNA07017.1};	--	--	--
XLOC_035712	NW_018745286.1	5767858	5768644	.	--	--	--	--	--	--	--
XLOC_001503	NW_018742241.1	357515	358316	.	--	--	--	--	--	--	--
XLOC_006001	NW_018742616.1	3955725	3957907	.	K19037 E3 ubiquitin-protein ligase ATL23 [EC:2.3.2.27] | (RefSeq) E3 ubiquitin-protein ligase ATL23 (A)	hypothetical protein SOVF_111720 [Spinacia oleracea]	RecName: Full=E3 ubiquitin-protein ligase ATL23; EC=2.3.2.27 {ECO:0000269|PubMed:15644464, ECO:0000269|PubMed:16339806}; AltName: Full=RING-H2 finger protein ATL23; AltName: Full=RING-type E3 ubiquitin transferase ATL23 {ECO:0000305};	SubName: Full=Uncharacterized protein {ECO:0000313|EMBL:KNA13966.1};	FOG: Predicted E3 ubiquitin ligase	GO:0061630,ubiquitin protein ligase activity; GO:0016021,integral component of membrane; GO:0016567,protein ubiquitination; GO:0043161,proteasome-mediated ubiquitin-dependent protein catabolic process; GO:0046872,metal ion binding; GO:0004842,ubiquitin-protein transferase activity	--
XLOC_012575	NW_018743175.1	5221817	5225345	-	--	unknown [Lotus japonicus]	--	SubName: Full=Uncharacterized protein {ECO:0000313|EMBL:AFK45486.1};	--	GO:0003676,nucleic acid binding	--
XLOC_038504	NW_018745617.1	3274011	3275514	+	--	uncharacterized protein LOC110691639 [Chenopodium quinoa]	--	SubName: Full=Uncharacterized protein {ECO:0000313|EMBL:KNA05185.1}; Flags: Fragment;	--	--	--
XLOC_030071	NW_018744702.1	212817	213270	.	--	--	--	--	--	--	--
XLOC_003740	NW_018742418.1	3129043	3131143	.	--	uncharacterized protein LOC110737733 isoform X1 [Chenopodium quinoa]	--	SubName: Full=Uncharacterized protein {ECO:0000313|EMBL:KNA17564.1};	--	--	--
XLOC_027317	NW_018744502.1	1836734	1837339	.	--	--	--	--	--	--	--
XLOC_013379	NW_018743206.1	1912859	1919301	+	--	heat shock 70 kDa protein cognate 1-like [Chenopodium quinoa]	--	--	--	--	--
XLOC_009877	NW_018742914.1	5647902	5649056	.	--	hypothetical protein BVRB_7g166820 [Beta vulgaris subsp. vulgaris]	--	SubName: Full=uncharacterized protein LOC104236594 {ECO:0000313|RefSeq:XP_009788850.1};	--	--	--
XLOC_007497	NW_018742738.1	571280	571487	.	--	--	--	--	--	--	--
XLOC_022495	NW_018744041.1	240985	258422	+	--	factor Xa inhibitor BuXI-like [Chenopodium quinoa]	--	--	--	--	--
XLOC_018124	NW_018743626.1	116805	119564	+	--	--	--	--	--	--	--
XLOC_022263	NW_018743979.1	2763240	2767391	+	K19984 exocyst complex component 5 | (RefSeq) uncharacterized protein LOC113272286 (A)	hypothetical protein SOVF_185310, partial [Spinacia oleracea]	RecName: Full=Zinc finger BED domain-containing protein RICESLEEPER 2; AltName: Full=Transposase-like protein RICESLEEPER 2;	SubName: Full=Uncharacterized protein {ECO:0000313|EMBL:KNA05978.1}; Flags: Fragment;	Tam3-transposase (Ac family)	GO:0003700,DNA-binding transcription factor activity; GO:0005634,nucleus; GO:0009791,post-embryonic development; GO:0006357,regulation of transcription by RNA polymerase II; GO:0000977,RNA polymerase II regulatory region sequence-specific DNA binding; GO:0046983,protein dimerization activity; GO:0046872,metal ion binding; GO:0006351,transcription, DNA-templated	hAT family C-terminal dimerisation region
XLOC_035851	NW_018745311.1	1410460	1410859	.	--	--	--	--	--	--	--
XLOC_003371	NW_018742418.1	6066842	6094583	+	K01303 acylaminoacyl-peptidase [EC:3.4.19.1] | (RefSeq) uncharacterized LOC101311565 (A)	PREDICTED: uncharacterized protein LOC104887336 [Beta vulgaris subsp. vulgaris]	RecName: Full=Uncharacterized mitochondrial protein AtMg00860; AltName: Full=ORF158;	SubName: Full=Uncharacterized protein {ECO:0000313|EMBL:KOM35206.1};	FOG: Transposon-encoded proteins with TYA, reverse transcriptase, integrase domains in various combinations	GO:0005739,mitochondrion	RNase H-like domain found in reverse transcriptase
XLOC_000305	NW_018742204.1	21243318	21245648	+	--	--	--	--	--	--	--
XLOC_023157	NW_018744080.1	1624172	1624835	+	--	--	--	--	--	--	Wnt and FGF inhibitory regulator
XLOC_002168	NW_018742309.1	2965533	2966464	.	K10712 cysteamine dioxygenase [EC:1.13.11.19] | (RefSeq) plant cysteine oxidase 3 (A)	plant cysteine oxidase 3 [Chenopodium quinoa]	RecName: Full=Plant cysteine oxidase 3 {ECO:0000303|PubMed:24599061}; EC=1.13.11.20; AltName: Full=NIFS-like protein 2 {ECO:0000303|PubMed:18978034}; Short=NifS2;	SubName: Full=Uncharacterized protein {ECO:0000313|EMBL:KNA15355.1};	Uncharacterized conserved protein	GO:0005737,cytoplasm; GO:0005634,nucleus; GO:0046872,metal ion binding; GO:0017172,cysteine dioxygenase activity; GO:0055114,oxidation-reduction process	PCO_ADO
XLOC_022994	NW_018744066.1	1636333	1637077	.	K22378 E3 ubiquitin-protein ligase RNF181 [EC:2.3.2.27] | (RefSeq) E3 ubiquitin-protein ligase RING1-like (A)	hypothetical protein BVRB_8g197390 [Beta vulgaris subsp. vulgaris]	RecName: Full=E3 ubiquitin-protein ligase RING1; EC=2.3.2.27; AltName: Full=RING finger protein 1; AltName: Full=RING-type E3 ubiquitin transferase RING1 {ECO:0000305};	SubName: Full=Uncharacterized protein {ECO:0000313|EMBL:KNA10973.1};	FOG: Predicted E3 ubiquitin ligase	GO:0046872,metal ion binding; GO:0004842,ubiquitin-protein transferase activity; GO:0090378,seed trichome elongation	Ring finger domain
XLOC_011249	NW_018743033.1	1277694	1278227	.	--	--	--	--	--	--	--
XLOC_004851	NW_018742484.1	1980726	1981283	.	--	--	--	--	--	--	--
XLOC_007499	NW_018742738.1	1388857	1389321	.	--	--	--	--	--	--	--
XLOC_009217	NW_018742899.1	2815068	2815587	.	--	--	--	--	--	--	--
XLOC_020160	NW_018743880.1	1315325	1318389	+	K14790 nucleolar protein 9 | (RefSeq) pumilio homolog 23-like (A)	pumilio homolog 23-like [Chenopodium quinoa]	--	RecName: Full=Glucose-6-phosphate 1-epimerase {ECO:0000256|PIRNR:PIRNR016020}; EC=5.1.3.15 {ECO:0000256|PIRNR:PIRNR016020};	Uncharacterized enzymes related to aldose 1-epimerase	GO:0005975,carbohydrate metabolic process; GO:0030246,carbohydrate binding; GO:0047938,glucose-6-phosphate 1-epimerase activity	Aldose 1-epimerase
XLOC_002765	NW_018742385.1	512866	514743	-	--	--	--	--	--	--	--
XLOC_023032	NW_018744069.1	824494	827169	-	--	--	--	--	--	--	--
XLOC_009863	NW_018742914.1	1922758	1923207	.	--	--	--	--	--	--	--
XLOC_005633	NW_018742577.1	3224022	3224622	.	--	uncharacterized protein LOC110792358 [Spinacia oleracea]	--	SubName: Full=Uncharacterized protein {ECO:0000313|EMBL:KNA21527.1};	--	--	--
XLOC_004890	NW_018742487.1	384504	386847	+	--	uncharacterized protein LOC110697853 isoform X1 [Chenopodium quinoa]	--	--	--	--	--
XLOC_026967	NW_018744469.1	3044217	3044868	.	--	--	--	--	--	--	--
XLOC_037674	NW_018745482.1	513700	514113	.	--	--	--	--	--	--	--
XLOC_011655	NW_018743066.1	528796	548191	-	--	uncharacterized protein LOC110707921 isoform X3 [Chenopodium quinoa]	--	--	--	--	--
XLOC_011422	NW_018743050.1	2547232	2548461	-	--	uncharacterized protein LOC110733849 [Chenopodium quinoa]	--	--	--	--	--
XLOC_035175	NW_018745248.1	743022	751039	-	--	--	--	--	--	--	--
XLOC_026969	NW_018744469.1	3362130	3362579	.	--	--	--	--	--	--	--
XLOC_024358	NW_018744143.1	2086769	2087465	.	--	uncharacterized protein LOC110779032 [Spinacia oleracea]	--	--	--	--	--
XLOC_029375	NW_018744633.1	6578906	6579569	.	K02492 glutamyl-tRNA reductase [EC:1.2.1.70] | (RefSeq) glutamyl-tRNA reductase 1, chloroplastic-like (A)	glutamyl-tRNA reductase 1, chloroplastic-like [Chenopodium quinoa]	--	--	--	--	--
XLOC_024077	NW_018744128.1	751325	751667	.	--	--	--	--	--	--	--
XLOC_034886	NW_018745177.1	935738	936827	-	--	uncharacterized protein LOC110682034 [Chenopodium quinoa]	--	--	--	--	--
XLOC_028214	NW_018744593.1	1530346	1531634	-	--	light-harvesting complex-like protein OHP1, chloroplastic [Chenopodium quinoa]	--	--	--	--	--
XLOC_002862	NW_018742390.1	1922962	1923200	.	--	--	--	--	--	--	--
XLOC_003728	NW_018742418.1	1343666	1344318	.	--	--	--	--	--	--	--
XLOC_036729	NW_018745448.1	10263922	10267677	+	K03006 DNA-directed RNA polymerase II subunit RPB1 [EC:2.7.7.6] | (RefSeq) LOW QUALITY PROTEIN: DNA-directed RNA polymerase II subunit 1-like (A)	Putative gag-pol polyprotein, identical [Solanum demissum]	RecName: Full=Retrovirus-related Pol polyprotein from transposon TNT 1-94; Includes: RecName: Full=Protease; EC=3.4.23.-; Includes: RecName: Full=Reverse transcriptase; EC=2.7.7.49; Includes: RecName: Full=Endonuclease;	SubName: Full=Putative ovule protein {ECO:0000313|EMBL:JAP36462.1}; Flags: Fragment;	FOG: Transposon-encoded proteins with TYA, reverse transcriptase, integrase domains in various combinations	GO:0004519,endonuclease activity; GO:0015074,DNA integration; GO:0004190,aspartic-type endopeptidase activity; GO:0008270,zinc ion binding; GO:0003676,nucleic acid binding; GO:0003964,RNA-directed DNA polymerase activity	gag-polypeptide of LTR copia-type
XLOC_009028	NW_018742881.1	961282	962002	.	--	--	--	--	--	--	--
XLOC_036054	NW_018745324.1	190267	191232	+	--	--	--	--	--	--	--
XLOC_022991	NW_018744066.1	1630169	1631137	.	K22378 E3 ubiquitin-protein ligase RNF181 [EC:2.3.2.27] | (RefSeq) hypothetical protein (A)	hypothetical protein SOVF_188010 [Spinacia oleracea]	RecName: Full=E3 ubiquitin-protein ligase RING1-like; EC=2.3.2.27; AltName: Full=RING finger protein 1; AltName: Full=RING-type E3 ubiquitin transferase RING1-like {ECO:0000305};	SubName: Full=Uncharacterized protein {ECO:0000313|EMBL:KNA05681.1};	FOG: Predicted E3 ubiquitin ligase	GO:0042787,NA; GO:0043161,proteasome-mediated ubiquitin-dependent protein catabolic process; GO:0046872,metal ion binding; GO:0061630,ubiquitin protein ligase activity; GO:0000209,protein polyubiquitination	Ring finger domain
XLOC_008551	NW_018742817.1	709041	709349	.	--	--	--	--	--	--	--
XLOC_018121	NW_018743623.1	868738	869003	.	K17964 leucine-rich PPR motif-containing protein, mitochondrial | (RefSeq) pentatricopeptide repeat-containing protein At5g57250, mitochondrial (A)	pentatricopeptide repeat-containing protein At5g57250, mitochondrial-like [Chenopodium quinoa]	RecName: Full=Pentatricopeptide repeat-containing protein At5g57250, mitochondrial; Flags: Precursor;	SubName: Full=Uncharacterized protein {ECO:0000313|EMBL:KNA11198.1};	FOG: PPR repeat	GO:0043231,intracellular membrane-bounded organelle; GO:0004519,endonuclease activity; GO:0003723,RNA binding; GO:0005739,mitochondrion; GO:0009451,RNA modification	PPR repeat
XLOC_022573	NW_018744041.1	260886	263748	-	--	uncharacterized protein LOC110692444 [Chenopodium quinoa]	--	--	--	--	--
XLOC_023338	NW_018744080.1	1532651	1532933	.	--	uncharacterized protein LOC110707921 isoform X1 [Chenopodium quinoa]	--	--	--	--	--
XLOC_033296	NW_018745003.1	1086161	1086730	.	--	--	--	--	--	--	--
XLOC_007998	NW_018742810.1	122556	127390	+	K12447 UDP-sugar pyrophosphorylase [EC:2.7.7.64] | (RefSeq) uncharacterized protein LOC104808371 (A)	uncharacterized protein LOC110708121 [Chenopodium quinoa]	RecName: Full=Retrovirus-related Pol polyprotein from transposon TNT 1-94; Includes: RecName: Full=Protease; EC=3.4.23.-; Includes: RecName: Full=Reverse transcriptase; EC=2.7.7.49; Includes: RecName: Full=Endonuclease;	SubName: Full=Retrovirus-related Pol polyprotein from transposon TNT 1-94 {ECO:0000313|EMBL:KYP64004.1}; Flags: Fragment;	FOG: Transposon-encoded proteins with TYA, reverse transcriptase, integrase domains in various combinations	GO:0004519,endonuclease activity; GO:0015074,DNA integration; GO:0004190,aspartic-type endopeptidase activity; GO:0008270,zinc ion binding; GO:0003676,nucleic acid binding; GO:0003964,RNA-directed DNA polymerase activity	--
XLOC_006912	NW_018742720.1	408756	409505	.	K15032 mTERF domain-containing protein, mitochondrial | (RefSeq) uncharacterized protein LOC110712169 (A)	uncharacterized protein LOC110712169 [Chenopodium quinoa]	--	SubName: Full=Uncharacterized protein {ECO:0000313|EMBL:KNA11306.1};	Mitochondrial transcription termination factor, mTERF	GO:0006355,regulation of transcription, DNA-templated; GO:0003690,double-stranded DNA binding	--
XLOC_031118	NW_018744858.1	2076807	2077774	+	--	uncharacterized protein LOC110699072 [Chenopodium quinoa]	--	--	--	--	--
XLOC_011286	NW_018743047.1	798032	801296	-	--	--	--	--	--	--	--
XLOC_036559	NW_018745413.1	3667942	3671806	-	K19984 exocyst complex component 5 | (RefSeq) uncharacterized protein LOC113272286 (A)	zinc finger BED domain-containing protein RICESLEEPER 2-like, partial [Spinacia oleracea]	RecName: Full=Putative AC transposase; AltName: Full=ORFA;	SubName: Full=Transposase {ECO:0000313|EMBL:AGH20188.1};	Tam3-transposase (Ac family)	GO:0006310,DNA recombination; GO:0046983,protein dimerization activity; GO:0032196,transposition; GO:0003677,DNA binding	Domain of unknown function (DUF4413)
XLOC_013352	NW_018743204.1	193992	194448	.	--	--	--	--	--	--	--
XLOC_032384	NW_018744988.1	2330411	2331479	.	K06943 nucleolar GTP-binding protein | (RefSeq) uncharacterized protein LOC108835530 (A)	PREDICTED: uncharacterized protein LOC104897505 [Beta vulgaris subsp. vulgaris]	RecName: Full=Putative ribonuclease H protein At1g65750; EC=3.1.26.4;	SubName: Full=Uncharacterized protein {ECO:0000313|EMBL:CCA66036.1};	FOG: Reverse transcriptase	GO:0046872,metal ion binding; GO:0004523,RNA-DNA hybrid ribonuclease activity; GO:0003676,nucleic acid binding	--
XLOC_020425	NW_018743906.1	2279654	2282926	-	K02989 small subunit ribosomal protein S5e | (RefSeq) 40S ribosomal protein S5 (A)	40S ribosomal protein S5-like [Cajanus cajan]	RecName: Full=40S ribosomal protein S5; Flags: Fragment;	SubName: Full=Uncharacterized protein {ECO:0000313|EMBL:KNA18203.1}; Flags: Fragment;	Ribosomal protein S7	GO:0003735,structural constituent of ribosome; GO:0015935,small ribosomal subunit; GO:0003723,RNA binding; GO:0006412,translation	Membrane-associated sensor
XLOC_017112	NW_018743555.1	1074375	1077609	-	K06943 nucleolar GTP-binding protein | (RefSeq) uncharacterized protein LOC108835530 (A)	uncharacterized protein LOC110703699 [Chenopodium quinoa]	RecName: Full=Putative ribonuclease H protein At1g65750; EC=3.1.26.4;	SubName: Full=Uncharacterized protein {ECO:0000313|EMBL:CCA66020.1};	FOG: Reverse transcriptase	GO:0046872,metal ion binding; GO:0004523,RNA-DNA hybrid ribonuclease activity; GO:0003676,nucleic acid binding	zinc-binding in reverse transcriptase
XLOC_032634	NW_018744991.1	1799879	1801758	.	K19882 O-palmitoleoyl-L-serine hydrolase [EC:3.1.1.98] | (RefSeq) pectin acetylesterase 5-like isoform X1 (A)	uncharacterized protein LOC110706507 [Chenopodium quinoa]	RecName: Full=Retrovirus-related Pol polyprotein from transposon TNT 1-94; Includes: RecName: Full=Protease; EC=3.4.23.-; Includes: RecName: Full=Reverse transcriptase; EC=2.7.7.49; Includes: RecName: Full=Endonuclease;	SubName: Full=Polypeptide with an integrase domain {ECO:0000313|EMBL:BAD99220.1};	FOG: Transposon-encoded proteins with TYA, reverse transcriptase, integrase domains in various combinations	GO:0004519,endonuclease activity; GO:0015074,DNA integration; GO:0004190,aspartic-type endopeptidase activity; GO:0008270,zinc ion binding; GO:0003676,nucleic acid binding; GO:0003964,RNA-directed DNA polymerase activity	Coiled-coil domain-containing protein 71L
XLOC_013837	NW_018743218.1	2165359	2166123	.	--	--	--	--	--	--	--
XLOC_027237	NW_018744502.1	1839507	1841970	-	--	--	--	--	--	--	--
XLOC_034806	NW_018745174.1	361937	362640	.	--	--	--	--	--	--	--
XLOC_038795	NW_018745653.1	212286	212560	.	--	hypothetical protein CQW23_33755 [Capsicum baccatum]	--	SubName: Full=Uncharacterized protein {ECO:0000313|EMBL:PHT26632.1};	--	--	--
XLOC_032301	NW_018744988.1	335308	336332	-	--	--	--	--	--	--	--
XLOC_009337	NW_018742904.1	2485992	2487848	.	K10393 kinesin family member 2/24 | (RefSeq) kinesin-13A-like (A)	uncharacterized protein LOC110728682 [Chenopodium quinoa]	RecName: Full=Putative ribonuclease H protein At1g65750; EC=3.1.26.4;	SubName: Full=uncharacterized protein LOC104217097 {ECO:0000313|RefSeq:XP_009765573.1};	FOG: Reverse transcriptase	GO:0046872,metal ion binding; GO:0004523,RNA-DNA hybrid ribonuclease activity; GO:0003676,nucleic acid binding	--
XLOC_019540	NW_018743828.1	814601	815839	-	--	--	--	--	--	--	Phosphorylase superfamily
XLOC_037760	NW_018745523.1	302000	305235	+	K21437 ankyrin repeat domain-containing protein 13 | (RefSeq) uncharacterized protein LOC112523844 (A)	zinc finger BED domain-containing protein RICESLEEPER 1-like [Chenopodium quinoa]	RecName: Full=Putative AC transposase; AltName: Full=ORFA;	SubName: Full=Uncharacterized protein {ECO:0000313|EMBL:KMS99565.1};	Tam3-transposase (Ac family)	GO:0006310,DNA recombination; GO:0046983,protein dimerization activity; GO:0032196,transposition; GO:0003677,DNA binding	hAT family C-terminal dimerisation region
XLOC_013128	NW_018743199.1	3020102	3023502	-	--	--	--	--	--	--	--
XLOC_017568	NW_018743574.1	3041632	3042603	-	--	--	--	--	--	--	--
XLOC_010002	NW_018742951.1	6129495	6134476	+	--	uncharacterized protein LOC110684673 [Chenopodium quinoa]	--	--	--	--	--
XLOC_005994	NW_018742616.1	925326	925690	.	--	--	--	--	--	--	--
XLOC_010135	NW_018742959.1	747291	748918	-	--	--	--	--	--	--	--
XLOC_000485	NW_018742204.1	11852249	11866448	-	--	--	--	--	--	--	--
XLOC_019704	NW_018743850.1	5696181	5701924	+	K16302 metal transporter CNNM | (RefSeq) DUF21 domain-containing protein At2g14520-like (A)	PREDICTED: uncharacterized protein LOC104902799 [Beta vulgaris subsp. vulgaris]	RecName: Full=Putative ribonuclease H protein At1g65750; EC=3.1.26.4;	SubName: Full=Uncharacterized protein {ECO:0000313|EMBL:KMS99360.1};	FOG: Reverse transcriptase	GO:0046872,metal ion binding; GO:0004523,RNA-DNA hybrid ribonuclease activity; GO:0003676,nucleic acid binding	Reverse transcriptase-like
XLOC_008294	NW_018742815.1	4462165	4462909	+	--	--	--	--	--	--	--
XLOC_003087	NW_018742407.1	177328	179477	+	--	--	--	--	--	--	--
XLOC_016603	NW_018743487.1	2614	3083	+	--	trypsin inhibitor 2-like [Chenopodium quinoa]	RecName: Full=Trypsin inhibitor 1B; AltName: Full=ETIB;	SubName: Full=Uncharacterized protein {ECO:0000313|EMBL:KNA07819.1};	--	GO:0004867,serine-type endopeptidase inhibitor activity	Trypsin and protease inhibitor
XLOC_034994	NW_018745190.1	664801	665068	.	--	--	--	--	--	--	--
XLOC_036593	NW_018745413.1	5609485	5611249	.	--	uncharacterized protein LOC110720069 [Chenopodium quinoa]	--	--	--	--	Lecithin retinol acyltransferase
XLOC_005263	NW_018742556.1	11008	11446	-	--	--	--	--	--	--	--
XLOC_033930	NW_018745054.1	3391270	3394274	+	K08900 mitochondrial chaperone BCS1 | (RefSeq) AAA-ATPase ASD, mitochondrial-like (A)	AAA-ATPase ASD, mitochondrial-like [Chenopodium quinoa]	RecName: Full=tRNA:m(4)X modification enzyme TRM13 {ECO:0000305}; EC=2.1.1.225 {ECO:0000305|PubMed:28369540}; AltName: Full=tRNA methylase 13 {ECO:0000305}; Short=OsTRM13 {ECO:0000303|PubMed:28369540};	SubName: Full=Uncharacterized protein {ECO:0000313|EMBL:KNA19593.1};	--	GO:0005737,cytoplasm; GO:0030488,tRNA methylation; GO:0005634,nucleus; GO:0008175,tRNA methyltransferase activity; GO:0009651,response to salt stress; GO:0046872,metal ion binding	--
XLOC_004421	NW_018742461.1	4160867	4161302	.	K14488 SAUR family protein | (RefSeq) indole-3-acetic acid-induced protein ARG7-like (A)	hypothetical protein SOVF_145860 [Spinacia oleracea]	RecName: Full=Auxin-responsive protein SAUR50 {ECO:0000303|PubMed:12036261}; AltName: Full=Protein SMALL AUXIN UP RNA 50 {ECO:0000303|PubMed:12036261};	SubName: Full=Uncharacterized protein {ECO:0000313|EMBL:KNA10283.1};	--	GO:0040008,regulation of growth; GO:0009734,auxin-activated signaling pathway	--
XLOC_032063	NW_018744946.1	25439	25702	+	--	hypothetical protein CQW23_32680 [Capsicum baccatum]	--	SubName: Full=Uncharacterized protein {ECO:0000313|EMBL:PHT27701.1};	--	--	--
XLOC_012917	NW_018743199.1	1852900	1855854	+	K08241 jasmonate O-methyltransferase [EC:2.1.1.141] | (RefSeq) caffeine synthase 1-like isoform X1 (A)	hypothetical protein SOVF_145700 [Spinacia oleracea]	RecName: Full=Caffeine synthase 1; EC=2.1.1.160;	SubName: Full=Uncharacterized protein {ECO:0000313|EMBL:KNA10299.1};	--	GO:0102740,theobromine:S-adenosyl-L-methionine 1-N-methyltransferase activity; GO:0102741,paraxanthine:S-adenosyl-L-methionine 3-N-methyltransferase activity; GO:0009820,alkaloid metabolic process	SAM dependent carboxyl methyltransferase
XLOC_028244	NW_018744593.1	3926935	3931248	-	K13217 pre-mRNA-processing factor 39 | (RefSeq) uncharacterized protein LOC114183870 isoform X1 (A)	hypothetical protein VITISV_013115 [Vitis vinifera]	RecName: Full=Retrovirus-related Pol polyprotein from transposon RE2; AltName: Full=Retro element 2 {ECO:0000303|PubMed:10689195}; Short=AtRE2 {ECO:0000303|PubMed:10689195}; Includes: RecName: Full=Protease RE2; EC=3.4.23.-; Includes: RecName: Full=Reverse transcriptase RE2; EC=2.7.7.49; Includes: RecName: Full=Endonuclease RE2;	SubName: Full=Uncharacterized protein {ECO:0000313|EMBL:CAN73272.1};	FOG: Transposon-encoded proteins with TYA, reverse transcriptase, integrase domains in various combinations	GO:0006310,DNA recombination; GO:0004519,endonuclease activity; GO:0015074,DNA integration; GO:0004190,aspartic-type endopeptidase activity; GO:0003676,nucleic acid binding; GO:0003964,RNA-directed DNA polymerase activity; GO:0046872,metal ion binding	Reverse transcriptase (RNA-dependent DNA polymerase)
XLOC_026992	NW_018744494.1	1725	1928	.	--	--	--	--	--	--	--
XLOC_038867	NW_018745675.1	447861	451683	-	--	uncharacterized protein LOC110723758 isoform X1 [Chenopodium quinoa]	--	--	--	--	--
XLOC_016873	NW_018743518.1	177838	180775	+	K17086 transmembrane 9 superfamily member 2/4 | (RefSeq) uncharacterized LOC101300290 (A)	uncharacterized protein LOC110795537 [Spinacia oleracea]	--	RecName: Full=alpha-1,2-Mannosidase {ECO:0000256|RuleBase:RU361193}; EC=3.2.1.- {ECO:0000256|RuleBase:RU361193};	--	GO:0003676,nucleic acid binding; GO:0016020,membrane; GO:0004571,mannosyl-oligosaccharide 1,2-alpha-mannosidase activity; GO:0005509,calcium ion binding; GO:0008152,metabolic process; GO:0008270,zinc ion binding	--
XLOC_030923	NW_018744835.1	1459885	1462030	+	--	fe-S cluster assembly factor HCF101, chloroplastic-like [Chenopodium quinoa]	RecName: Full=Fe-S cluster assembly factor HCF101, chloroplastic; AltName: Full=Protein HIGH CHLOROPHYLL FLUORESCENCE 101; Flags: Precursor;	SubName: Full=Fe-S cluster assembly factor, chloroplastic {ECO:0000313|EMBL:PHT51965.1}; Flags: Fragment;	Predicted ATPase, nucleotide-binding	GO:0009570,chloroplast stroma; GO:0051536,iron-sulfur cluster binding; GO:0016226,iron-sulfur cluster assembly; GO:0046872,metal ion binding; GO:0005524,ATP binding; GO:0009507,chloroplast	--
XLOC_019431	NW_018743812.1	548890	550764	.	--	uncharacterized protein LOC110707921 isoform X1 [Chenopodium quinoa]	--	SubName: Full=Fgenesh protein 21 {ECO:0000313|EMBL:ABD83280.1};	--	--	--
XLOC_034819	NW_018745174.1	2104210	2105225	.	--	hypothetical protein BVRB_3g062350 [Beta vulgaris subsp. vulgaris]	--	--	--	--	--
XLOC_024631	NW_018744151.1	2152244	2153206	.	--	hypothetical protein SOVF_015780 [Spinacia oleracea]	--	SubName: Full=Uncharacterized protein {ECO:0000313|EMBL:KNA24425.1};	--	--	--
XLOC_025765	NW_018744301.1	21550	22166	.	--	--	--	--	--	--	--
XLOC_026290	NW_018744367.1	156402	157626	+	--	uncharacterized protein LOC110719426 [Chenopodium quinoa]	--	--	--	--	--
XLOC_005536	NW_018742577.1	740650	741342	-	--	--	--	--	--	--	--
XLOC_028431	NW_018744616.1	2134616	2135319	.	--	--	--	--	--	--	--
XLOC_034817	NW_018745174.1	2021304	2021825	.	--	--	--	--	--	--	--
XLOC_026156	NW_018744311.1	2160995	2161984	.	--	--	--	--	--	--	--
XLOC_017142	NW_018743555.1	2808265	2809367	.	--	--	--	--	--	--	--
XLOC_034776	NW_018745174.1	1134821	1135565	-	--	--	--	--	--	--	--
XLOC_022383	NW_018743987.1	2496542	2497193	.	--	--	--	--	--	--	--
XLOC_004182	NW_018742461.1	4411172	4413198	+	--	hypothetical protein SOVF_175760 [Spinacia oleracea]	--	SubName: Full=Uncharacterized protein {ECO:0000313|EMBL:KNA07016.1};	--	--	--
XLOC_033442	NW_018745024.1	5934516	5936515	+	--	uncharacterized protein LOC110682392 [Chenopodium quinoa]	--	SubName: Full=Uncharacterized protein {ECO:0000313|EMBL:KNA16808.1};	--	GO:0008234,cysteine-type peptidase activity	--
XLOC_035808	NW_018745291.1	1320586	1321781	.	K12874 intron-binding protein aquarius | (RefSeq) LOW QUALITY PROTEIN: intron-binding protein aquarius-like (A)	uncharacterized protein LOC110714013 [Chenopodium quinoa]	--	SubName: Full=Uncharacterized protein {ECO:0000313|EMBL:CCA66036.1};	FOG: Reverse transcriptase	GO:0003676,nucleic acid binding	--
XLOC_018382	NW_018743669.1	519611	520319	.	--	--	--	--	--	--	--
XLOC_015036	NW_018743292.1	4887772	4889928	-	--	--	--	--	--	--	--
XLOC_030192	NW_018744704.1	6143638	6144587	.	--	--	--	--	--	--	--
XLOC_013743	NW_018743212.1	6008197	6010130	-	--	--	--	--	--	--	--
XLOC_038225	NW_018745542.1	644021	644908	-	--	--	--	--	--	--	--
XLOC_036475	NW_018745410.1	7668865	7669565	.	--	--	--	--	--	--	--
XLOC_025323	NW_018744268.1	2834076	2835397	.	--	--	--	--	--	--	--
XLOC_034991	NW_018745190.1	155882	156094	.	--	--	--	--	--	--	--
XLOC_000078	NW_018742204.1	5730295	5731446	+	--	hypothetical protein SOVF_014360 [Spinacia oleracea]	--	SubName: Full=Uncharacterized protein {ECO:0000313|EMBL:KNA24567.1};	--	--	--
XLOC_006511	NW_018742684.1	1593842	1598793	+	--	uncharacterized protein LOC110786409 [Spinacia oleracea]	--	SubName: Full=Uncharacterized protein {ECO:0000313|EMBL:KNA20188.1};	--	--	--
XLOC_034252	NW_018745080.1	1229435	1232830	-	K17767 AH receptor-interacting protein | (RefSeq) peptidyl-prolyl cis-trans isomerase FKBP62-like (A)	uncharacterized protein LOC110714482 [Chenopodium quinoa]	RecName: Full=Peptidyl-prolyl cis-trans isomerase FKBP62; Short=PPIase FKBP62; EC=5.2.1.8; AltName: Full=70 kDa peptidyl-prolyl isomerase; AltName: Full=FK506-binding protein 62; Short=AtFKBP62; AltName: Full=Immunophilin FKBP62; AltName: Full=Peptidylprolyl isomerase ROF1; AltName: Full=Protein ROTAMASE FKBP 1; AltName: Full=Rotamase;	SubName: Full=Uncharacterized protein {ECO:0000313|EMBL:KNA07995.1};	FKBP-type peptidyl-prolyl cis-trans isomerase	GO:0005737,cytoplasm; GO:0005634,nucleus; GO:0005528,FK506 binding; GO:0005516,calmodulin binding; GO:0003755,peptidyl-prolyl cis-trans isomerase activity; GO:0061077,chaperone-mediated protein folding; GO:0070370,cellular heat acclimation	--
XLOC_029382	NW_018744633.1	7234607	7235850	.	K12120 phytochrome A | (RefSeq) phytochrome A1-like (A)	PREDICTED: uncharacterized protein LOC104898810 [Beta vulgaris subsp. vulgaris]	RecName: Full=Putative ribonuclease H protein At1g65750; EC=3.1.26.4;	SubName: Full=Uncharacterized protein {ECO:0000313|EMBL:CCA66036.1};	FOG: Reverse transcriptase	GO:0046872,metal ion binding; GO:0004523,RNA-DNA hybrid ribonuclease activity; GO:0003676,nucleic acid binding	--
XLOC_001871	NW_018742263.1	4570736	4573806	+	--	uncharacterized protein LOC110724967 [Chenopodium quinoa]	--	--	--	--	--
XLOC_020171	NW_018743880.1	2190675	2191005	.	--	ankyrin repeat-containing protein At5g02620-like [Chenopodium quinoa]	--	SubName: Full=Uncharacterized protein {ECO:0000313|EMBL:KNA18726.1};	FOG: Ankyrin repeat	GO:0016021,integral component of membrane	--
XLOC_020763	NW_018743920.1	531084	532633	+	K01358 ATP-dependent Clp protease, protease subunit [EC:3.4.21.92] | (RefSeq) ATP-dependent Clp protease proteolytic subunit 3, chloroplastic-like (A)	ATP-dependent Clp protease proteolytic subunit 3, chloroplastic-like [Chenopodium quinoa]	RecName: Full=ATP-dependent Clp protease proteolytic subunit 3, chloroplastic {ECO:0000303|PubMed:11299370}; EC=3.4.21.92; AltName: Full=Endopeptidase ClpP3 {ECO:0000303|PubMed:11299370}; Short=nClpP3; AltName: Full=nClpP4; Flags: Precursor;	RecName: Full=ATP-dependent Clp protease proteolytic subunit {ECO:0000256|RuleBase:RU003567}; EC=3.4.21.92 {ECO:0000256|RuleBase:RU000549};	ATP-dependent Clp protease, proteolytic subunit	GO:0004252,serine-type endopeptidase activity; GO:0009941,chloroplast envelope; GO:0009570,chloroplast stroma; GO:0009534,chloroplast thylakoid; GO:0009532,plastid stroma; GO:0009840,chloroplastic endopeptidase Clp complex; GO:0009507,chloroplast	--
XLOC_002542	NW_018742345.1	8718153	8719059	-	--	uncharacterized protein LOC110700038 isoform X2 [Chenopodium quinoa]	--	--	--	--	--
XLOC_022070	NW_018743977.1	864443	865696	+	--	hypothetical protein SOVF_100270 [Spinacia oleracea]	--	SubName: Full=Uncharacterized protein {ECO:0000313|EMBL:KNA15172.1};	--	--	--
XLOC_023248	NW_018744080.1	869369	871273	-	--	uncharacterized protein LOC110729246 isoform X1 [Chenopodium quinoa]	--	SubName: Full=Uncharacterized protein {ECO:0000313|EMBL:KMS99793.1};	--	--	--
XLOC_036585	NW_018745413.1	849771	851751	.	K17767 AH receptor-interacting protein | (RefSeq) peptidyl-prolyl cis-trans isomerase FKBP62-like (A)	uncharacterized protein LOC110714482 [Chenopodium quinoa]	RecName: Full=Peptidyl-prolyl cis-trans isomerase FKBP62; Short=PPIase FKBP62; EC=5.2.1.8; AltName: Full=70 kDa peptidyl-prolyl isomerase; AltName: Full=FK506-binding protein 62; Short=AtFKBP62; AltName: Full=Immunophilin FKBP62; AltName: Full=Peptidylprolyl isomerase ROF1; AltName: Full=Protein ROTAMASE FKBP 1; AltName: Full=Rotamase;	SubName: Full=Uncharacterized protein {ECO:0000313|EMBL:KMS96588.1};	FKBP-type peptidyl-prolyl cis-trans isomerase	GO:0005737,cytoplasm; GO:0005634,nucleus; GO:0005528,FK506 binding; GO:0005516,calmodulin binding; GO:0003755,peptidyl-prolyl cis-trans isomerase activity; GO:0061077,chaperone-mediated protein folding; GO:0070370,cellular heat acclimation	--
XLOC_005567	NW_018742577.1	1568009	1570487	-	--	uncharacterized protein LOC110720917 [Chenopodium quinoa]	--	--	--	--	Reverse transcriptase-like
XLOC_023690	NW_018744093.1	2751500	2758192	-	--	--	--	--	--	--	--
XLOC_019146	NW_018743783.1	2886003	2886276	.	--	--	--	--	--	--	--
XLOC_008478	NW_018742815.1	3660132	3660404	.	--	uncharacterized protein LOC110721224 [Chenopodium quinoa]	--	SubName: Full=Uncharacterized protein {ECO:0000313|EMBL:KMS96022.1};	--	--	--
XLOC_018475	NW_018743691.1	4383943	4384440	+	--	uncharacterized protein LOC110704025 [Chenopodium quinoa]	--	SubName: Full=Uncharacterized protein {ECO:0000313|EMBL:KNA11746.1};	--	GO:0008234,cysteine-type peptidase activity	--
XLOC_024634	NW_018744151.1	3109307	3111264	.	--	uncharacterized protein LOC110707921 isoform X1 [Chenopodium quinoa]	--	SubName: Full=Fgenesh protein 21 {ECO:0000313|EMBL:ABD83280.1};	--	--	--
XLOC_007980	NW_018742798.1	4580854	4581406	.	K20924 cellulose synthase-like protein [EC:2.4.1.-] | (RefSeq) cellulose synthase-like protein D1 (A)	cellulose synthase-like protein D1 [Chenopodium quinoa]	RecName: Full=Cellulose synthase-like protein D1; Short=AtCslD1; EC=2.4.1.-;	SubName: Full=Uncharacterized protein {ECO:0000313|EMBL:KMT14872.1};	--	GO:0005794,Golgi apparatus; GO:0016021,integral component of membrane; GO:0030244,cellulose biosynthetic process; GO:0071555,cell wall organization; GO:0051753,mannan synthase activity; GO:0016760,cellulose synthase (UDP-forming) activity; GO:0009846,pollen germination; GO:0000139,Golgi membrane; GO:0071669,plant-type cell wall organization or biogenesis	--
XLOC_015814	NW_018743369.1	806101	807323	.	--	--	--	--	--	--	--
XLOC_031285	NW_018744874.1	2483392	2485215	+	--	uncharacterized protein LOC110718996 [Chenopodium quinoa]	--	SubName: Full=Uncharacterized protein {ECO:0000313|EMBL:KNA10552.1};	--	--	--
XLOC_024458	NW_018744151.1	4352616	4353778	+	--	--	--	--	--	--	Predicted membrane protein (DUF2207)
XLOC_003504	NW_018742418.1	2020411	2022419	-	K19984 exocyst complex component 5 | (RefSeq) uncharacterized protein LOC113272286 (A)	transposase [Amaranthus palmeri]	RecName: Full=Putative AC transposase; AltName: Full=ORFA;	SubName: Full=Transposase {ECO:0000313|EMBL:AGH20188.1};	Tam3-transposase (Ac family)	GO:0006310,DNA recombination; GO:0046983,protein dimerization activity; GO:0032196,transposition; GO:0003677,DNA binding	--
XLOC_021378	NW_018743920.1	8850251	8853454	-	--	uncharacterized protein LOC110686889 [Chenopodium quinoa]	--	SubName: Full=Uncharacterized protein {ECO:0000313|EMBL:OMO91298.1};	--	GO:0016021,integral component of membrane	--
XLOC_036796	NW_018745448.1	10413255	10414799	-	--	--	--	--	--	--	--
XLOC_037996	NW_018745533.1	911063	913241	+	K19984 exocyst complex component 5 | (RefSeq) uncharacterized protein LOC113272286 (A)	zinc finger BED domain-containing protein RICESLEEPER 2-like [Chenopodium quinoa]	RecName: Full=Zinc finger BED domain-containing protein RICESLEEPER 2; AltName: Full=Transposase-like protein RICESLEEPER 2;	SubName: Full=Uncharacterized protein {ECO:0000313|EMBL:KJB29513.1};	Tam3-transposase (Ac family)	GO:0003700,DNA-binding transcription factor activity; GO:0005634,nucleus; GO:0009791,post-embryonic development; GO:0006357,regulation of transcription by RNA polymerase II; GO:0000977,RNA polymerase II regulatory region sequence-specific DNA binding; GO:0046983,protein dimerization activity; GO:0046872,metal ion binding; GO:0006351,transcription, DNA-templated	--
XLOC_008662	NW_018742864.1	2242364	2242623	.	--	uncharacterized protein LOC110733013 [Chenopodium quinoa]	--	SubName: Full=Uncharacterized protein {ECO:0000313|EMBL:KNA16275.1};	--	--	--
XLOC_034022	NW_018745065.1	1651295	1654980	+	--	--	--	--	--	--	--
XLOC_039527	NW_018745684.1	7478883	7484427	.	K06943 nucleolar GTP-binding protein | (RefSeq) uncharacterized protein LOC108835530 (A)	uncharacterized protein LOC110738655 [Chenopodium quinoa]	RecName: Full=Putative ribonuclease H protein At1g65750; EC=3.1.26.4;	SubName: Full=Uncharacterized protein {ECO:0000313|EMBL:KNA11209.1};	FOG: Reverse transcriptase	GO:0046872,metal ion binding; GO:0004523,RNA-DNA hybrid ribonuclease activity; GO:0003676,nucleic acid binding	Reverse transcriptase-like
XLOC_038740	NW_018745650.1	5887215	5888005	.	--	uncharacterized protein LOC110798538 [Spinacia oleracea]	--	SubName: Full=Uncharacterized protein {ECO:0000313|EMBL:KNA04645.1};	--	--	--
XLOC_028289	NW_018744593.1	4440616	4441145	.	--	pentatricopeptide repeat-containing protein At5g18390, mitochondrial-like [Chenopodium quinoa]	--	--	--	--	--
XLOC_031105	NW_018744858.1	1273207	1273661	+	--	--	--	--	--	--	--
XLOC_001492	NW_018742241.1	670634	675614	-	K17086 transmembrane 9 superfamily member 2/4 | (RefSeq) uncharacterized LOC101300290 (A)	PREDICTED: uncharacterized protein LOC104899603 [Beta vulgaris subsp. vulgaris]	--	SubName: Full=Uncharacterized protein {ECO:0000313|EMBL:EMJ28425.1}; Flags: Fragment;	--	GO:0008270,zinc ion binding	--
XLOC_039529	NW_018745684.1	7617698	7618183	.	--	--	--	--	--	--	--
XLOC_010862	NW_018743017.1	4581	5088	.	--	--	--	--	--	--	--
XLOC_023120	NW_018744072.1	1121470	1123248	.	--	hypothetical protein SOVF_193690 [Spinacia oleracea]	--	SubName: Full=Uncharacterized protein {ECO:0000313|EMBL:KNA05079.1};	--	GO:0016021,integral component of membrane	--
XLOC_025075	NW_018744239.1	7559770	7560391	-	K03238 translation initiation factor 2 subunit 2 | (RefSeq) eukaryotic translation initiation factor 2 subunit beta-like (A)	eukaryotic translation initiation factor 2 subunit beta-like [Olea europaea var. sylvestris]	RecName: Full=Eukaryotic translation initiation factor 2 subunit beta; Short=eIF-2-beta;	SubName: Full=Uncharacterized protein {ECO:0000313|EMBL:PKI38417.1};	Translation initiation factor 2, beta subunit (eIF-2beta)	GO:0046872,metal ion binding; GO:0003743,translation initiation factor activity	--
XLOC_023623	NW_018744092.1	2044581	2045743	.	--	uncharacterized protein LOC110718000 [Chenopodium quinoa]	--	SubName: Full=Uncharacterized protein {ECO:0000313|EMBL:KNA21669.1};	--	GO:0016021,integral component of membrane	--
XLOC_004426	NW_018742461.1	4892186	4892701	.	K11491 condensin-2 complex subunit D3 | (RefSeq) condensin-2 complex subunit D3-like (A)	condensin-2 complex subunit D3-like [Chenopodium quinoa]	--	SubName: Full=Uncharacterized protein {ECO:0000313|EMBL:KNA17361.1};	--	GO:0007076,mitotic chromosome condensation	--
XLOC_019968	NW_018743850.1	3584768	3585123	.	--	--	--	--	--	--	--
XLOC_016371	NW_018743405.1	4755773	4756867	-	--	--	--	--	--	--	--
XLOC_017429	NW_018743574.1	7604380	7607041	+	--	hypothetical protein SOVF_190440 [Spinacia oleracea]	--	SubName: Full=Uncharacterized protein {ECO:0000313|EMBL:KNA05430.1};	--	GO:0016021,integral component of membrane	--
XLOC_020380	NW_018743906.1	2020378	2022727	+	K03515 DNA repair protein REV1 [EC:2.7.7.-] | (RefSeq) uncharacterized protein LOC107894697 (A)	uncharacterized protein LOC110730780 [Chenopodium quinoa]	RecName: Full=Retrovirus-related Pol polyprotein from transposon RE1; AltName: Full=Retro element 1 {ECO:0000303|PubMed:10689195}; Short=AtRE1 {ECO:0000303|PubMed:10689195}; Includes: RecName: Full=Protease RE1; EC=3.4.23.-; Includes: RecName: Full=Reverse transcriptase RE1; EC=2.7.7.49; Includes: RecName: Full=Endonuclease RE1;	SubName: Full=Retrovirus-related Pol polyprotein from transposon TNT 1-94 {ECO:0000313|EMBL:KYP63606.1};	FOG: Transposon-encoded proteins with TYA, reverse transcriptase, integrase domains in various combinations	GO:0006310,DNA recombination; GO:0004519,endonuclease activity; GO:0015074,DNA integration; GO:0004190,aspartic-type endopeptidase activity; GO:0003676,nucleic acid binding; GO:0003964,RNA-directed DNA polymerase activity; GO:0046872,metal ion binding	Integrase core domain
XLOC_005858	NW_018742616.1	4167934	4169088	+	--	--	--	--	--	--	--
XLOC_015779	NW_018743360.1	42578	43074	.	K19984 exocyst complex component 5 | (RefSeq) uncharacterized protein LOC113272286 (A)	zinc finger BED domain-containing protein RICESLEEPER 2-like [Chenopodium quinoa]	RecName: Full=Zinc finger BED domain-containing protein RICESLEEPER 3; AltName: Full=Transposase-like protein RICESLEEPER 3;	SubName: Full=Uncharacterized protein {ECO:0000313|EMBL:KNA06017.1}; Flags: Fragment;	Tam3-transposase (Ac family)	GO:0003700,DNA-binding transcription factor activity; GO:0005634,nucleus; GO:0009791,post-embryonic development; GO:0006357,regulation of transcription by RNA polymerase II; GO:0000977,RNA polymerase II regulatory region sequence-specific DNA binding; GO:0046983,protein dimerization activity; GO:0046872,metal ion binding; GO:0006351,transcription, DNA-templated	--
XLOC_019436	NW_018743813.1	546021	546895	+	--	--	--	--	--	--	--
XLOC_005163	NW_018742552.1	630423	630952	.	K17604 zinc finger SWIM domain-containing protein 3 | (RefSeq) protein FAR-RED IMPAIRED RESPONSE 1-like isoform X1 (A)	protein FAR1-RELATED SEQUENCE 6-like [Chenopodium quinoa]	RecName: Full=Protein FAR-RED IMPAIRED RESPONSE 1;	SubName: Full=Uncharacterized protein {ECO:0000313|EMBL:KNA10251.1};	--	GO:0009639,response to red or far red light; GO:0009585,red, far-red light phototransduction; GO:0003700,DNA-binding transcription factor activity; GO:0005634,nucleus; GO:0010218,response to far red light; GO:0042753,positive regulation of circadian rhythm; GO:0008270,zinc ion binding; GO:0010017,red or far-red light signaling pathway; GO:0010018,far-red light signaling pathway; GO:0045893,positi…	--
XLOC_007421	NW_018742738.1	4190533	4192536	-	--	uncharacterized protein LOC110740281 [Chenopodium quinoa]	--	SubName: Full=Uncharacterized protein {ECO:0000313|EMBL:KNA02738.1}; Flags: Fragment;	--	--	--
XLOC_034340	NW_018745080.1	1984149	1986564	.	K13447 respiratory burst oxidase [EC:1.6.3.- 1.11.1.-] | (RefSeq) respiratory burst oxidase homolog protein D-like (A)	hypothetical protein [Beta vulgaris subsp. vulgaris]	RecName: Full=Putative ribonuclease H protein At1g65750; EC=3.1.26.4;	SubName: Full=Uncharacterized protein {ECO:0000313|EMBL:CCA66009.1};	FOG: Reverse transcriptase	GO:0046872,metal ion binding; GO:0004523,RNA-DNA hybrid ribonuclease activity; GO:0003676,nucleic acid binding	--
XLOC_024636	NW_018744151.1	3175158	3175581	.	--	hypothetical protein BVRB_8g183260 [Beta vulgaris subsp. vulgaris]	--	--	--	--	--
XLOC_021229	NW_018743920.1	5176606	5178758	-	--	neural Wiskott-Aldrich syndrome protein-like [Chenopodium quinoa]	--	SubName: Full=Uncharacterized protein {ECO:0000313|EMBL:KNA18843.1};	Protein conjugation factor involved in autophagy	GO:0016021,integral component of membrane	--
XLOC_030307	NW_018744718.1	3471137	3474312	+	--	uncharacterized protein LOC110719101 [Chenopodium quinoa]	--	SubName: Full=Uncharacterized protein {ECO:0000313|EMBL:KNA22348.1};	--	--	Domain of unknown function (DUF4968)
XLOC_005410	NW_018742564.1	58917	59173	.	--	uncharacterized protein LOC110793288 [Spinacia oleracea]	--	SubName: Full=Uncharacterized protein {ECO:0000313|EMBL:CCA66009.1};	--	GO:0004523,RNA-DNA hybrid ribonuclease activity; GO:0003676,nucleic acid binding	--
XLOC_024883	NW_018744239.1	3797898	3803216	+	K19984 exocyst complex component 5 | (RefSeq) uncharacterized protein LOC113272286 (A)	zinc finger BED domain-containing protein RICESLEEPER 2-like [Chenopodium quinoa]	RecName: Full=Zinc finger BED domain-containing protein RICESLEEPER 2; AltName: Full=Transposase-like protein RICESLEEPER 2;	SubName: Full=AC transposase {ECO:0000313|EMBL:PKU60703.1};	Tam3-transposase (Ac family)	GO:0003700,DNA-binding transcription factor activity; GO:0005634,nucleus; GO:0009791,post-embryonic development; GO:0006357,regulation of transcription by RNA polymerase II; GO:0000977,RNA polymerase II regulatory region sequence-specific DNA binding; GO:0046983,protein dimerization activity; GO:0046872,metal ion binding; GO:0006351,transcription, DNA-templated	Domain of unknown function (DUF4413)
XLOC_032920	NW_018745000.1	5880067	5882440	-	--	CASP-like protein 2B1 [Chenopodium quinoa]	RecName: Full=CASP-like protein 2B1; Short=VvCASPL2B1;	RecName: Full=CASP-like protein {ECO:0000256|RuleBase:RU361233};	--	GO:0016021,integral component of membrane; GO:0005886,plasma membrane	--
XLOC_023615	NW_018744092.1	693283	693571	.	K08235 xyloglucan:xyloglucosyl transferase [EC:2.4.1.207] | (RefSeq) xyloglucan endotransglucosylase/hydrolase protein 31-like (A)	xyloglucan endotransglucosylase/hydrolase protein 31-like [Chenopodium quinoa]	RecName: Full=Probable xyloglucan endotransglucosylase/hydrolase protein 32; Short=At-XTH32; Short=XTH-32; EC=2.4.1.207; Flags: Precursor;	SubName: Full=Uncharacterized protein {ECO:0000313|EMBL:KNA17444.1};	--	GO:0042546,cell wall biogenesis; GO:0016998,cell wall macromolecule catabolic process; GO:0005618,cell wall; GO:0048046,apoplast; GO:0071555,cell wall organization; GO:0016762,xyloglucan:xyloglucosyl transferase activity; GO:0004553,hydrolase activity, hydrolyzing O-glycosyl compounds; GO:0010411,xyloglucan metabolic process	--
XLOC_022671	NW_018744062.1	67762	68305	+	--	--	--	--	--	--	--
XLOC_005039	NW_018742523.1	4611751	4612641	.	K19984 exocyst complex component 5 | (RefSeq) uncharacterized protein LOC113272286 (A)	hypothetical protein SOVF_185310, partial [Spinacia oleracea]	RecName: Full=Putative AC transposase; AltName: Full=ORFA;	SubName: Full=Uncharacterized protein {ECO:0000313|EMBL:KNA05978.1}; Flags: Fragment;	Tam3-transposase (Ac family)	GO:0006310,DNA recombination; GO:0046983,protein dimerization activity; GO:0032196,transposition; GO:0003677,DNA binding	--
XLOC_017782	NW_018743574.1	7927536	7927920	.	K13366 polyamine oxidase [EC:1.5.3.14 1.5.3.16 1.5.3.-] | (RefSeq) polyamine oxidase-like (A)	polyamine oxidase-like [Chenopodium quinoa]	--	--	--	--	--
XLOC_031185	NW_018744858.1	3691234	3691708	.	--	--	--	--	--	--	--
XLOC_037950	NW_018745523.1	287163	287897	.	--	--	--	--	--	--	--
XLOC_028749	NW_018744626.1	1332667	1333740	-	--	unnamed protein product [Coffea canephora]	--	SubName: Full=Uncharacterized protein {ECO:0000313|EMBL:CDP20466.1};	--	--	--
XLOC_003198	NW_018742410.1	1156744	1156954	.	--	--	--	--	--	--	--
XLOC_013195	NW_018743199.1	4810108	4812451	-	K10406 kinesin family member C2/C3 | (RefSeq) kinesin KP1-like (A)	uncharacterized protein LOC110705809 [Chenopodium quinoa]	--	SubName: Full=Uncharacterized protein {ECO:0000313|EMBL:KNA19099.1};	--	--	--
XLOC_034996	NW_018745193.1	68301	68567	.	--	--	--	--	--	--	--
XLOC_035453	NW_018745281.1	1315425	1320416	-	K15446 tRNA:m4X modification enzyme [EC:2.1.1.225] | (RefSeq) tRNA:m(4)X modification enzyme TRM13 homolog (A)	uncharacterized protein LOC110700157 isoform X1 [Chenopodium quinoa]	RecName: Full=tRNA:m(4)X modification enzyme TRM13 {ECO:0000305}; EC=2.1.1.225 {ECO:0000305|PubMed:28369540}; AltName: Full=tRNA methylase 13 {ECO:0000305}; Short=OsTRM13 {ECO:0000303|PubMed:28369540};	SubName: Full=Uncharacterized protein {ECO:0000313|EMBL:KNA19593.1};	Uncharacterized conserved protein	GO:0005737,cytoplasm; GO:0030488,tRNA methylation; GO:0005634,nucleus; GO:0008175,tRNA methyltransferase activity; GO:0009651,response to salt stress; GO:0046872,metal ion binding	Methyltransferase TRM13
XLOC_038728	NW_018745650.1	2212039	2212412	.	--	--	--	--	--	--	--
XLOC_021523	NW_018743937.1	3579611	3581028	-	--	--	--	--	--	--	UL73 viral envelope glycoprotein
XLOC_033838	NW_018745024.1	8664772	8667562	.	K13093 HIV Tat-specific factor 1 | (RefSeq) splicing factor U2AF-associated protein 2-like isoform X1 (A)	splicing factor U2AF-associated protein 2-like isoform X2 [Chenopodium quinoa]	--	--	--	--	--
XLOC_010512	NW_018742980.1	1957474	1958438	+	--	--	--	--	--	--	--
XLOC_023293	NW_018744080.1	3261530	3261986	-	--	uncharacterized protein LOC110704025 [Chenopodium quinoa]	--	--	--	--	--
XLOC_005996	NW_018742616.1	2331248	2331812	.	--	uncharacterized protein LOC110707921 isoform X1 [Chenopodium quinoa]	--	--	--	--	--
XLOC_001373	NW_018742222.1	615332	616268	+	--	--	--	--	--	--	--
XLOC_010315	NW_018742966.1	1178328	1179456	-	--	--	--	--	--	--	--
XLOC_005037	NW_018742523.1	3411348	3412045	.	--	uncharacterized protein LOC110729962 [Chenopodium quinoa]	--	--	--	--	Molybdate transporter of MFS superfamily
XLOC_035282	NW_018745275.1	271896	272817	+	--	hypothetical protein SOVF_198770, partial [Spinacia oleracea]	--	SubName: Full=Uncharacterized protein {ECO:0000313|EMBL:KNA04541.1}; Flags: Fragment;	--	--	--
XLOC_004399	NW_018742461.1	433876	434730	.	--	hypothetical protein SOVF_029570 [Spinacia oleracea]	--	SubName: Full=Uncharacterized protein {ECO:0000313|EMBL:KNA22922.1};	--	--	Domain of unknown function (DUF4228)
XLOC_024347	NW_018744143.1	960222	961116	.	--	nucleolin-like [Chenopodium quinoa]	RecName: Full=B-box domain protein 30 {ECO:0000303|PubMed:19920209}; Short=AtBBX30 {ECO:0000303|PubMed:19920209}; AltName: Full=Microprotein 1A {ECO:0000303|PubMed:27015278};	SubName: Full=Uncharacterized protein {ECO:0000313|EMBL:KMS98388.1};	--	GO:0030674,protein binding, bridging; GO:0005634,nucleus; GO:0007623,circadian rhythm; GO:0008270,zinc ion binding; GO:0009909,regulation of flower development	--
XLOC_022310	NW_018743979.1	1000626	1001655	.	--	--	--	--	--	--	--
XLOC_024803	NW_018744187.1	1514534	1515576	-	--	--	--	--	--	--	--
XLOC_021699	NW_018743946.1	3938552	3939627	-	--	--	--	--	--	--	--
XLOC_026532	NW_018744394.1	668752	701306	+	--	--	--	--	--	--	Family of unknown function (DUF5555)
XLOC_000768	NW_018742204.1	10286126	10286799	.	--	--	--	--	--	--	--
XLOC_024349	NW_018744143.1	1077368	1078065	.	--	uncharacterized protein LOC110800035 [Spinacia oleracea]	--	SubName: Full=Uncharacterized protein {ECO:0000313|EMBL:KNA03778.1};	--	--	--
XLOC_023050	NW_018744072.1	1066155	1067826	+	--	hypothetical protein BVRB_6g141760 [Beta vulgaris subsp. vulgaris]	--	SubName: Full=Uncharacterized protein {ECO:0000313|EMBL:KMT08309.1};	--	--	--
XLOC_007424	NW_018742738.1	4420145	4421063	-	--	--	--	--	--	--	--
XLOC_034534	NW_018745170.1	1936296	1936805	+	--	protein KAKU4-like [Chenopodium quinoa]	--	SubName: Full=Uncharacterized protein {ECO:0000313|EMBL:KNA13206.1};	--	--	--
XLOC_032948	NW_018745000.1	4832942	4833686	.	--	--	--	--	--	--	--
XLOC_011119	NW_018743032.1	2422092	2423485	+	--	--	--	--	--	--	--
XLOC_026597	NW_018744445.1	65618	68988	-	--	--	--	--	--	--	--
XLOC_036378	NW_018745410.1	1876355	1879908	+	K19984 exocyst complex component 5 | (RefSeq) uncharacterized protein LOC113272286 (A)	uncharacterized protein LOC110710692 [Chenopodium quinoa]	RecName: Full=Zinc finger BED domain-containing protein RICESLEEPER 1; AltName: Full=Transposase-like protein RICESLEEPER 1;	SubName: Full=zinc finger BED domain-containing protein RICESLEEPER 2-like {ECO:0000313|RefSeq:XP_016740977.1, ECO:0000313|RefSeq:XP_016742294.1};	Tam3-transposase (Ac family)	GO:0003700,DNA-binding transcription factor activity; GO:0005634,nucleus; GO:0009791,post-embryonic development; GO:0006357,regulation of transcription by RNA polymerase II; GO:0000977,RNA polymerase II regulatory region sequence-specific DNA binding; GO:0046983,protein dimerization activity; GO:0046872,metal ion binding; GO:0006351,transcription, DNA-templated	Domain of unknown function (DUF4413)
XLOC_004857	NW_018742484.1	2429816	2430662	.	--	--	--	--	--	--	--
XLOC_009211	NW_018742899.1	1897945	1899527	.	K03515 DNA repair protein REV1 [EC:2.7.7.-] | (RefSeq) uncharacterized protein LOC107894697 (A)	uncharacterized protein LOC110736809 [Chenopodium quinoa]	--	SubName: Full=Uncharacterized protein {ECO:0000313|EMBL:CAN80919.1};	FOG: Transposon-encoded proteins with TYA, reverse transcriptase, integrase domains in various combinations	GO:0015074,DNA integration; GO:0003676,nucleic acid binding	GAG-pre-integrase domain
XLOC_009871	NW_018742914.1	4505572	4506852	.	--	uncharacterized protein LOC110727179 isoform X1 [Chenopodium quinoa]	--	--	--	--	--
XLOC_005730	NW_018742607.1	319992	321156	-	--	--	--	--	--	--	--
XLOC_003058	NW_018742393.1	2277841	2278875	.	--	hypothetical protein BVRB_2g027710 [Beta vulgaris subsp. vulgaris]	--	--	--	--	--
XLOC_035332	NW_018745281.1	731619	733541	+	K17604 zinc finger SWIM domain-containing protein 3 | (RefSeq) protein FAR1-RELATED SEQUENCE 6-like (A)	protein FAR1-RELATED SEQUENCE 6-like isoform X2 [Chenopodium quinoa]	RecName: Full=Protein FAR-RED IMPAIRED RESPONSE 1;	SubName: Full=Uncharacterized protein {ECO:0000313|EMBL:KNA16107.1}; Flags: Fragment;	--	GO:0009639,response to red or far red light; GO:0009585,red, far-red light phototransduction; GO:0003700,DNA-binding transcription factor activity; GO:0005634,nucleus; GO:0010218,response to far red light; GO:0042753,positive regulation of circadian rhythm; GO:0008270,zinc ion binding; GO:0010017,red or far-red light signaling pathway; GO:0010018,far-red light signaling pathway; GO:0045893,positi…	--
XLOC_027311	NW_018744502.1	1286636	1286844	.	--	--	--	--	--	--	--
XLOC_024722	NW_018744167.1	118059	119011	-	--	uncharacterized protein LOC110795405 isoform X1 [Spinacia oleracea]	--	--	--	--	--
XLOC_004859	NW_018742484.1	2616219	2616872	.	--	uncharacterized protein At4g22758-like [Chenopodium quinoa]	--	SubName: Full=Uncharacterized protein {ECO:0000313|EMBL:KNA14860.1};	FOG: PPR repeat	--	--
XLOC_023527	NW_018744092.1	1972734	1979000	-	--	uncharacterized protein LOC110726185 isoform X1 [Chenopodium quinoa]	--	--	--	--	SOCE-associated regulatory factor of calcium homoeostasis
XLOC_025919	NW_018744304.1	4013119	4013364	.	--	--	--	--	--	--	--
XLOC_016680	NW_018743510.1	149739	151389	+	--	--	--	--	--	--	--
XLOC_002165	NW_018742309.1	1547555	1548624	.	--	--	--	--	--	--	--
XLOC_027167	NW_018744502.1	1568009	1575246	+	K01456 peptide-N4-(N-acetyl-beta-glucosaminyl)asparagine amidase [EC:3.5.1.52] | (RefSeq) peptide-N(4)-(N-acetyl-beta- glucosaminyl)asparagine amidase isoform X1 (A)	ribonuclease E/G-like protein, chloroplastic isoform X1 [Spinacia oleracea]	RecName: Full=Ribonuclease E/G-like protein, chloroplastic; Short=RNase E/G-like protein; EC=3.1.26.-; AltName: Full=RNase E; Flags: Precursor;	SubName: Full=Uncharacterized protein {ECO:0000313|EMBL:KNA14101.1};	Voltage-gated shaker-like K+ channel, subunit beta/KCNAB	GO:0009570,chloroplast stroma; GO:1901259,chloroplast rRNA processing; GO:0004521,endoribonuclease activity; GO:0009658,chloroplast organization; GO:0010239,chloroplast mRNA processing; GO:0003723,RNA binding; GO:2001070,starch binding; GO:0009507,chloroplast	Aldo/keto reductase family
XLOC_036059	NW_018745324.1	985902	987115	+	--	PREDICTED: nephrocystin-3 [Daucus carota subsp. sativus]	--	SubName: Full=Uncharacterized protein {ECO:0000313|EMBL:KZN05670.1};	--	--	--
XLOC_012853	NW_018743197.1	3708529	3711105	-	--	--	--	--	--	--	--
XLOC_035535	NW_018745281.1	3039941	3040934	.	--	--	--	--	--	--	--
XLOC_015130	NW_018743292.1	7978406	7979759	-	--	hypothetical protein BVRB_4g076130 [Beta vulgaris subsp. vulgaris]	--	SubName: Full=Uncharacterized protein {ECO:0000313|EMBL:KMT14257.1};	--	--	--
XLOC_004496	NW_018742483.1	774142	774565	.	--	--	--	--	--	--	--
XLOC_020440	NW_018743911.1	52646	62939	+	K13181 ATP-dependent RNA helicase DDX27 [EC:3.6.4.13] | (RefSeq) DEAD-box ATP-dependent RNA helicase 28-like (A)	uncharacterized protein LOC110696692 [Chenopodium quinoa]	--	SubName: Full=Uncharacterized protein {ECO:0000313|EMBL:KNA20145.1};	--	--	--
XLOC_007983	NW_018742801.1	286461	293214	+	--	uncharacterized protein LOC110720933 isoform X1 [Chenopodium quinoa]	--	SubName: Full=Uncharacterized protein {ECO:0000313|EMBL:KNA21858.1};	--	--	--
XLOC_017353	NW_018743574.1	5243230	5245028	+	--	hypothetical protein SOVF_047180 [Spinacia oleracea]	--	SubName: Full=Uncharacterized protein {ECO:0000313|EMBL:KNA21010.1};	--	--	--
XLOC_036132	NW_018745324.1	3333265	3333972	.	K00799 glutathione S-transferase [EC:2.5.1.18] | (RefSeq) uncharacterized protein LOC110786294 (A)	uncharacterized protein LOC110714988 isoform X5 [Chenopodium quinoa]	--	SubName: Full=Uncharacterized protein {ECO:0000313|EMBL:CCA66040.1};	FOG: Reverse transcriptase	GO:0003676,nucleic acid binding	--
XLOC_031026	NW_018744845.1	962790	969439	-	--	--	--	--	--	--	--
XLOC_024355	NW_018744143.1	1320260	1320806	.	--	protein PIN-LIKES 5-like [Chenopodium quinoa]	--	--	--	--	--
XLOC_021475	NW_018743937.1	1917470	1919492	+	--	--	--	--	--	--	--
XLOC_038680	NW_018745650.1	2347284	2348181	-	K13201 nucleolysin TIA-1/TIAR | (RefSeq) oligouridylate-binding protein 1-like isoform X1 (A)	uncharacterized protein LOC110706087 [Chenopodium quinoa]	--	SubName: Full=Uncharacterized protein {ECO:0000313|EMBL:KNA26131.1};	--	GO:0016021,integral component of membrane	--
XLOC_038183	NW_018745540.1	465776	469443	-	K07466 replication factor A1 | (RefSeq) replication protein A 70 kDa DNA-binding subunit B-like (A)	replication protein A 70 kDa DNA-binding subunit B-like [Spinacia oleracea]	--	SubName: Full=Uncharacterized protein {ECO:0000313|EMBL:KNA18265.1}; Flags: Fragment;	--	--	--
XLOC_035178	NW_018745248.1	1629176	1630831	-	--	uncharacterized protein LOC110728739 [Chenopodium quinoa]	--	SubName: Full=Uncharacterized protein {ECO:0000313|EMBL:KNA04930.1}; Flags: Fragment;	--	--	--
XLOC_011434	NW_018743050.1	466590	467068	.	K05925 mRNA (2'-O-methyladenosine-N6-)-methyltransferase [EC:2.1.1.62] | (RefSeq) N6-adenosine-methyltransferase MT-A70-like (A)	PREDICTED: N6-adenosine-methyltransferase MT-A70-like [Beta vulgaris subsp. vulgaris]	--	--	--	--	--
XLOC_032389	NW_018744988.1	2958405	2958853	.	--	--	--	--	--	--	--
XLOC_003725	NW_018742418.1	1175219	1176164	.	K12524 bifunctional aspartokinase / homoserine dehydrogenase 1 [EC:2.7.2.4 1.1.1.3] | (RefSeq) bifunctional aspartokinase/homoserine dehydrogenase 2, chloroplastic-like (A)	zinc finger MYM-type protein 1-like [Chenopodium quinoa]	--	SubName: Full=Putative transposase {ECO:0000313|EMBL:ACN38703.1};	--	GO:0046983,protein dimerization activity	--
XLOC_011244	NW_018743033.1	134537	136275	.	--	uncharacterized protein LOC110737449 [Chenopodium quinoa]	--	SubName: Full=Uncharacterized protein {ECO:0000313|EMBL:KNA15804.1};	--	--	--
XLOC_012862	NW_018743197.1	4591942	4592151	.	--	--	--	--	--	--	--
XLOC_027314	NW_018744502.1	1525011	1525332	.	--	ribonuclease E/G-like protein, chloroplastic isoform X1 [Chenopodium quinoa]	RecName: Full=Ribonuclease E/G-like protein, chloroplastic; Short=RNase E/G-like protein; EC=3.1.26.-; AltName: Full=RNase E; Flags: Precursor;	SubName: Full=Uncharacterized protein {ECO:0000313|EMBL:CCB51755.1};	--	GO:0009570,chloroplast stroma; GO:1901259,chloroplast rRNA processing; GO:0004521,endoribonuclease activity; GO:0009658,chloroplast organization; GO:0010239,chloroplast mRNA processing; GO:0003723,RNA binding; GO:2001070,starch binding; GO:0009507,chloroplast	--
XLOC_031290	NW_018744874.1	2576845	2577845	+	--	--	--	--	--	--	--
XLOC_009025	NW_018742881.1	469911	471394	.	--	--	--	--	--	--	--
XLOC_011704	NW_018743066.1	1687160	1688201	-	--	--	--	--	--	--	--
XLOC_033520	NW_018745024.1	9608307	9608669	+	--	--	--	--	--	--	--
XLOC_007494	NW_018742738.1	164863	165920	.	--	--	--	--	--	--	--
XLOC_005260	NW_018742556.1	2245283	2246562	+	--	cysteine proteinase inhibitor A-like [Spinacia oleracea]	--	RecName: Full=Cysteine proteinase inhibitor {ECO:0000256|RuleBase:RU362130};	--	GO:0004869,cysteine-type endopeptidase inhibitor activity	--
XLOC_000454	NW_018742204.1	8402782	8412435	-	K01303 acylaminoacyl-peptidase [EC:3.4.19.1] | (RefSeq) uncharacterized LOC101311565 (A)	uncharacterized protein LOC110682970 [Chenopodium quinoa]	RecName: Full=RNA-directed DNA polymerase homolog; EC=2.7.7.48; AltName: Full=Reverse transcriptase homolog;	SubName: Full=Uncharacterized protein {ECO:0000313|EMBL:KOM35206.1};	FOG: Transposon-encoded proteins with TYA, reverse transcriptase, integrase domains in various combinations	GO:0003964,RNA-directed DNA polymerase activity; GO:0003968,RNA-directed 5'-3' RNA polymerase activity; GO:0005739,mitochondrion	--
XLOC_023335	NW_018744080.1	1153730	1153944	.	--	uncharacterized protein LOC110712334 [Chenopodium quinoa]	--	--	--	--	--
XLOC_027444	NW_018744537.1	527914	532547	+	--	uncharacterized protein LOC110777450 isoform X1 [Spinacia oleracea]	--	SubName: Full=Uncharacterized protein {ECO:0000313|EMBL:KNA22172.1};	--	--	--
XLOC_008557	NW_018742817.1	3583215	3583621	.	--	--	--	--	--	--	--
XLOC_001286	NW_018742205.1	4147082	4147695	.	K09422 transcription factor MYB, plant | (RefSeq) transcription factor MYB61-like (A)	hypothetical protein TSUD_35770 [Trifolium subterraneum]	RecName: Full=Transcription factor MYB61 {ECO:0000305}; AltName: Full=Myb-related protein 61 {ECO:0000305}; Short=AtMYB61 {ECO:0000303|PubMed:16005292};	SubName: Full=MYB transcription factor MYB64 {ECO:0000313|EMBL:ABH02909.1}; Flags: Fragment;	Transcription factor, Myb superfamily	GO:0009733,response to auxin; GO:0043565,sequence-specific DNA binding; GO:0010214,seed coat development; GO:0010089,xylem development; GO:0044212,transcription regulatory region DNA binding; GO:0003700,DNA-binding transcription factor activity; GO:0005634,nucleus; GO:0030154,cell differentiation; GO:0048364,root development; GO:0010087,phloem or xylem histogenesis; GO:0006357,regulation of trans…	Myb-like DNA-binding domain
XLOC_036590	NW_018745413.1	3658861	3659189	.	--	--	--	--	--	--	--
XLOC_020428	NW_018743906.1	279543	279832	.	--	--	--	--	--	--	--
XLOC_030449	NW_018744722.1	533865	534914	+	--	--	--	--	--	--	--
XLOC_022561	NW_018744041.1	2293014	2293437	+	--	--	--	--	--	--	--
XLOC_027764	NW_018744539.1	31114	31576	.	K08726 soluble epoxide hydrolase / lipid-phosphate phosphatase [EC:3.3.2.10 3.1.3.76] | (RefSeq) uncharacterized protein LOC111482470 isoform X1 (A)	uncharacterized protein LOC110727922 [Chenopodium quinoa]	--	SubName: Full=Uncharacterized protein {ECO:0000313|EMBL:KNA20320.1};	Soluble epoxide hydrolase	GO:0003824,catalytic activity	--
XLOC_026964	NW_018744469.1	2586100	2587017	.	--	--	--	--	--	--	--
XLOC_037677	NW_018745485.1	97642	102489	+	--	--	--	--	--	--	--
XLOC_036127	NW_018745324.1	1845651	1846966	.	--	--	--	--	--	--	--
XLOC_030773	NW_018744821.1	2128497	2133160	+	--	activating transcription factor 7-interacting protein 1-like [Chenopodium quinoa]	--	SubName: Full=Uncharacterized protein {ECO:0000313|EMBL:KNA23217.1}; Flags: Fragment;	--	--	--
XLOC_027033	NW_018744497.1	148220	148739	.	--	--	--	--	--	--	--
XLOC_004872	NW_018742484.1	5979522	5980064	.	K17604 zinc finger SWIM domain-containing protein 3 | (RefSeq) uncharacterized protein LOC105169002 isoform X1 (A)	uncharacterized protein LOC110711755 [Chenopodium quinoa]	--	SubName: Full=Uncharacterized protein {ECO:0000313|EMBL:PKA53002.1};	--	--	--
XLOC_003839	NW_018742433.1	56216	56830	.	--	--	--	--	--	--	--
XLOC_022380	NW_018743987.1	1008953	1009517	.	K12447 UDP-sugar pyrophosphorylase [EC:2.7.7.64] | (RefSeq) uncharacterized protein LOC104808371 (A)	PREDICTED: uncharacterized protein LOC104893304 [Beta vulgaris subsp. vulgaris]	RecName: Full=Retrovirus-related Pol polyprotein from transposon RE1; AltName: Full=Retro element 1 {ECO:0000303|PubMed:10689195}; Short=AtRE1 {ECO:0000303|PubMed:10689195}; Includes: RecName: Full=Protease RE1; EC=3.4.23.-; Includes: RecName: Full=Reverse transcriptase RE1; EC=2.7.7.49; Includes: RecName: Full=Endonuclease RE1;	SubName: Full=Uncharacterized protein {ECO:0000313|EMBL:CAN76645.1}; Flags: Fragment;	FOG: Transposon-encoded proteins with TYA, reverse transcriptase, integrase domains in various combinations	GO:0006310,DNA recombination; GO:0004519,endonuclease activity; GO:0015074,DNA integration; GO:0004190,aspartic-type endopeptidase activity; GO:0003676,nucleic acid binding; GO:0003964,RNA-directed DNA polymerase activity; GO:0046872,metal ion binding	--
XLOC_016049	NW_018743389.1	4819897	4820412	-	--	--	--	--	--	--	--
XLOC_011187	NW_018743033.1	2631778	2638071	+	--	F-box protein CPR30-like [Chenopodium quinoa]	RecName: Full=F-box protein CPR1; AltName: Full=Protein CONSTITUTIVE EXPRESSER OF PR GENES 1; AltName: Full=Protein CONSTITUTIVE EXPRESSER OF PR GENES 30 {ECO:0000303|PubMed:19682297};	SubName: Full=Uncharacterized protein {ECO:0000313|EMBL:KNA12328.1};	--	GO:0005737,cytoplasm; GO:0005634,nucleus; GO:0031146,SCF-dependent proteasomal ubiquitin-dependent protein catabolic process; GO:0009626,plant-type hypersensitive response; GO:0031348,negative regulation of defense response; GO:0042177,negative regulation of protein catabolic process; GO:0004842,ubiquitin-protein transferase activity	--
XLOC_027231	NW_018744502.1	1271758	1274197	-	--	probable LRR receptor-like serine/threonine-protein kinase At4g29180 [Spinacia oleracea]	RecName: Full=Putative leucine-rich repeat receptor-like serine/threonine-protein kinase At2g04300; EC=2.7.11.1; Flags: Precursor;	SubName: Full=Uncharacterized protein {ECO:0000313|EMBL:KNA18110.1};	--	GO:0004674,protein serine/threonine kinase activity; GO:0016021,integral component of membrane; GO:0005524,ATP binding; GO:0005886,plasma membrane	--
XLOC_036129	NW_018745324.1	2794705	2795036	.	--	--	--	--	--	--	--
XLOC_037953	NW_018745523.1	778992	779515	.	--	hypothetical protein SOVF_191020 [Spinacia oleracea]	--	SubName: Full=Uncharacterized protein {ECO:0000313|EMBL:KNA05366.1};	--	--	--
XLOC_025385	NW_018744284.1	583189	584225	.	--	--	--	--	--	--	--
XLOC_038004	NW_018745533.1	1432192	1434304	+	--	protein FAR1-RELATED SEQUENCE 5-like [Chenopodium quinoa]	--	SubName: Full=Uncharacterized protein {ECO:0000313|EnsemblPlants:TRIAE_CS42_7BL_TGACv1_578876_AA1901340.1};	--	GO:0006355,regulation of transcription, DNA-templated; GO:0008270,zinc ion binding	MULE transposase domain
XLOC_033627	NW_018745024.1	1414133	1415746	-	--	--	--	--	--	--	--
XLOC_012075	NW_018743122.1	96652	99824	+	K02896 large subunit ribosomal protein L24e | (RefSeq) 60S ribosomal protein L24 (A)	60S ribosomal protein L24 [Chenopodium quinoa]	RecName: Full=60S ribosomal protein L24;	SubName: Full=Uncharacterized protein {ECO:0000313|EMBL:KNA23373.1};	60s ribosomal protein L24	GO:0005840,ribosome	Ribosomal protein L24e
XLOC_012824	NW_018743197.1	645239	650295	+	K10393 kinesin family member 2/24 | (RefSeq) kinesin-13A-like (A)	uncharacterized protein LOC110695570 [Chenopodium quinoa]	RecName: Full=Putative ribonuclease H protein At1g65750; EC=3.1.26.4;	SubName: Full=Uncharacterized protein {ECO:0000313|EMBL:CCA65981.1};	FOG: Reverse transcriptase	GO:0046872,metal ion binding; GO:0004523,RNA-DNA hybrid ribonuclease activity; GO:0003676,nucleic acid binding	--
XLOC_033302	NW_018745003.1	1401328	1401538	.	--	--	--	--	--	--	--
XLOC_025635	NW_018744297.1	25549	29367	-	K01768 adenylate cyclase [EC:4.6.1.1] | (RefSeq) LOW QUALITY PROTEIN: uncharacterized protein LOC107911085 (A)	Putative gag-pol polyprotein, identical [Solanum demissum]	RecName: Full=Retrovirus-related Pol polyprotein from transposon RE2; AltName: Full=Retro element 2 {ECO:0000303|PubMed:10689195}; Short=AtRE2 {ECO:0000303|PubMed:10689195}; Includes: RecName: Full=Protease RE2; EC=3.4.23.-; Includes: RecName: Full=Reverse transcriptase RE2; EC=2.7.7.49; Includes: RecName: Full=Endonuclease RE2;	SubName: Full=Putative gag-pol polyprotein, identical {ECO:0000313|EMBL:AAT38758.1};	FOG: Transposon-encoded proteins with TYA, reverse transcriptase, integrase domains in various combinations	GO:0006310,DNA recombination; GO:0004519,endonuclease activity; GO:0015074,DNA integration; GO:0004190,aspartic-type endopeptidase activity; GO:0003676,nucleic acid binding; GO:0003964,RNA-directed DNA polymerase activity; GO:0046872,metal ion binding	Reverse transcriptase (RNA-dependent DNA polymerase)
XLOC_016452	NW_018743434.1	523148	524224	-	K03283 heat shock 70kDa protein 1/2/6/8 | (RefSeq) heat shock cognate 70 kDa protein-like (A)	heat shock 70 kDa protein cognate 1-like [Chenopodium quinoa]	RecName: Full=Probable mediator of RNA polymerase II transcription subunit 37c; AltName: Full=Heat shock 70 kDa protein 4; AltName: Full=Heat shock cognate 70 kDa protein 4; AltName: Full=Heat shock cognate protein 70-4; Short=AtHsc70-4; AltName: Full=Heat shock protein 70-4; Short=AtHsp70-4;	SubName: Full=Heat shock protein {ECO:0000313|EMBL:AAC84134.1}; Flags: Fragment;	Molecular chaperones HSP70/HSC70, HSP70 superfamily	GO:0005794,Golgi apparatus; GO:0031625,ubiquitin protein ligase binding; GO:0006355,regulation of transcription, DNA-templated; GO:0005618,cell wall; GO:0009615,response to virus; GO:0005829,cytosol; GO:0009617,response to bacterium; GO:0005774,vacuolar membrane; GO:0005739,mitochondrion; GO:0042542,response to hydrogen peroxide; GO:0048046,apoplast; GO:0016567,protein ubiquitination; GO:0006351,…	--
XLOC_011749	NW_018743066.1	1912913	1915055	.	K20855 beta-1,3-galactosyltransferase 1/2/3/4/5/7/8 [EC:2.4.1.-] | (RefSeq) probable beta-1,3-galactosyltransferase 2 (A)	uncharacterized protein LOC110687365 [Chenopodium quinoa]	--	SubName: Full=Uncharacterized protein {ECO:0000313|EMBL:KNA24128.1};	--	--	--
XLOC_027316	NW_018744502.1	1776461	1776732	.	--	--	--	--	--	--	--
XLOC_009876	NW_018742914.1	5606033	5606303	.	--	--	--	--	--	--	--
XLOC_007496	NW_018742738.1	570134	570470	.	--	--	--	--	--	--	--
XLOC_037844	NW_018745523.1	3952524	3953641	+	--	--	--	--	--	--	--
XLOC_011209	NW_018743033.1	311252	314487	-	--	uncharacterized protein LOC110696272 isoform X1 [Chenopodium quinoa]	--	SubName: Full=Uncharacterized protein {ECO:0000313|EMBL:KNA15899.1}; Flags: Fragment;	--	--	--
XLOC_011246	NW_018743033.1	664023	664239	.	--	--	--	--	--	--	--
XLOC_018018	NW_018743616.1	1098334	1099282	-	--	uncharacterized protein LOC110683645 [Chenopodium quinoa]	RecName: Full=Putative ribonuclease H protein At1g65750; EC=3.1.26.4;	SubName: Full=Uncharacterized protein {ECO:0000313|EMBL:CCA65997.1};	FOG: Reverse transcriptase	GO:0046872,metal ion binding; GO:0004523,RNA-DNA hybrid ribonuclease activity; GO:0003676,nucleic acid binding	--
XLOC_033971	NW_018745063.1	1796407	1799865	+	K19984 exocyst complex component 5 | (RefSeq) uncharacterized protein LOC113272286 (A)	uncharacterized protein LOC110710692 [Chenopodium quinoa]	RecName: Full=Zinc finger BED domain-containing protein RICESLEEPER 2; AltName: Full=Transposase-like protein RICESLEEPER 2;	SubName: Full=zinc finger BED domain-containing protein RICESLEEPER 2-like {ECO:0000313|RefSeq:XP_016668820.1};	Tam3-transposase (Ac family)	GO:0003700,DNA-binding transcription factor activity; GO:0005634,nucleus; GO:0009791,post-embryonic development; GO:0006357,regulation of transcription by RNA polymerase II; GO:0000977,RNA polymerase II regulatory region sequence-specific DNA binding; GO:0046983,protein dimerization activity; GO:0046872,metal ion binding; GO:0006351,transcription, DNA-templated	hAT family C-terminal dimerisation region
XLOC_022313	NW_018743979.1	1395096	1395795	.	--	--	--	--	--	--	--
XLOC_024076	NW_018744128.1	748508	748777	.	--	--	--	--	--	--	Domain of unknown function (DUF4666)
XLOC_030481	NW_018744733.1	19531	20120	.	--	--	--	--	--	--	--
XLOC_013869	NW_018743252.1	3319674	3322089	+	--	--	--	--	--	--	IQ calmodulin-binding motif
XLOC_034889	NW_018745177.1	1392449	1394372	-	--	zinc finger CCCH domain-containing protein 53-like isoform X1 [Chenopodium quinoa]	--	--	--	--	--
XLOC_032956	NW_018745000.1	7260447	7264335	.	K20178 vacuolar protein sorting-associated protein 8 | (RefSeq) uncharacterized LOC107864957 (A)	PREDICTED: uncharacterized protein LOC104899180 [Beta vulgaris subsp. vulgaris]	RecName: Full=Putative ribonuclease H protein At1g65750; EC=3.1.26.4;	SubName: Full=Uncharacterized protein {ECO:0000313|EMBL:CCA65981.1};	FOG: Reverse transcriptase	GO:0046872,metal ion binding; GO:0004523,RNA-DNA hybrid ribonuclease activity; GO:0003676,nucleic acid binding	--
XLOC_011098	NW_018743021.1	2349613	2351211	.	K21866 ion channel POLLUX/CASTOR | (RefSeq) ion channel CASTOR-like (A)	uncharacterized protein LOC110730268 isoform X2 [Chenopodium quinoa]	RecName: Full=Putative ribonuclease H protein At1g65750; EC=3.1.26.4;	SubName: Full=Uncharacterized protein {ECO:0000313|EMBL:CCA65997.1};	FOG: Reverse transcriptase	GO:0046872,metal ion binding; GO:0004523,RNA-DNA hybrid ribonuclease activity; GO:0003676,nucleic acid binding	--
XLOC_028641	NW_018744626.1	4249465	4250505	+	--	--	--	--	--	--	--
XLOC_026966	NW_018744469.1	3042820	3043444	.	--	--	--	--	--	--	--
XLOC_013225	NW_018743199.1	3498544	3499764	.	--	uncharacterized protein LOC110699470 [Chenopodium quinoa]	--	SubName: Full=Uncharacterized protein {ECO:0000313|EMBL:KNA23815.1};	--	--	--
XLOC_003228	NW_018742415.1	356429	357413	+	--	uncharacterized protein LOC110704084 [Chenopodium quinoa]	--	--	--	--	--
XLOC_003780	NW_018742418.1	9701912	9702564	.	--	--	--	--	--	--	Protein of unknown function (DUF1700)
XLOC_005677	NW_018742597.1	488662	505030	+	--	--	--	--	--	--	--
XLOC_018556	NW_018743691.1	1334613	1334998	.	--	uncharacterized protein LOC110737109 [Chenopodium quinoa]	--	SubName: Full=Endonuclease/exonuclease/phosphatase family protein {ECO:0000313|EMBL:KEH40872.1};	--	GO:0004519,endonuclease activity; GO:0004527,exonuclease activity	--
XLOC_022233	NW_018743977.1	1345226	1345603	.	--	--	--	--	--	--	--
XLOC_034679	NW_018745170.1	1690751	1692052	.	--	uncharacterized protein LOC110682846 [Chenopodium quinoa]	--	SubName: Full=uncharacterized protein LOC108995794 {ECO:0000313|RefSeq:XP_018826971.1};	FOG: Reverse transcriptase	--	--
XLOC_033585	NW_018745024.1	11599488	11601232	+	--	--	--	--	--	--	--
XLOC_032898	NW_018745000.1	3318229	3319403	-	--	--	--	--	--	--	--
XLOC_038203	NW_018745540.1	2029792	2031461	.	K22683 aspartyl protease family protein [EC:3.4.23.-] | (RefSeq) hypothetical protein (A)	basic 7S globulin-like [Chenopodium quinoa]	RecName: Full=Basic 7S globulin; AltName: Full=SBg7S; Short=Bg; Contains: RecName: Full=Basic 7S globulin high kDa subunit; Contains: RecName: Full=Basic 7S globulin low kDa subunit; Flags: Precursor;	SubName: Full=Uncharacterized protein {ECO:0000313|EMBL:KNA22751.1};	Aspartyl protease	GO:0006508,proteolysis; GO:0004190,aspartic-type endopeptidase activity; GO:0045735,nutrient reservoir activity; GO:0042802,identical protein binding; GO:0030163,protein catabolic process	Xylanase inhibitor C-terminal
XLOC_002829	NW_018742390.1	1841178	1843845	-	K14827 pre-rRNA-processing protein IPI1 | (RefSeq) testis-expressed sequence 10 protein (A)	uncharacterized protein LOC110712732 [Chenopodium quinoa]	--	SubName: Full=Uncharacterized protein {ECO:0000313|EMBL:KNA06840.1};	--	--	--
XLOC_012135	NW_018743136.1	2826931	2834924	-	--	hypothetical protein BVRB_7g165340 [Beta vulgaris subsp. vulgaris]	--	SubName: Full=Uncharacterized protein {ECO:0000313|EMBL:KNA06522.1}; Flags: Fragment;	--	--	--
XLOC_006143	NW_018742630.1	1701991	1702520	.	--	U-box domain-containing protein 52-like [Chenopodium quinoa]	--	SubName: Full=Uncharacterized protein {ECO:0000313|EMBL:KMS97308.1};	--	GO:0042026,protein refolding; GO:0005524,ATP binding; GO:0009507,chloroplast	--
XLOC_031529	NW_018744878.1	2482368	2504239	+	--	--	--	--	--	--	--
XLOC_037962	NW_018745523.1	1956821	1957538	.	--	--	--	--	--	--	--
XLOC_001281	NW_018742205.1	2899666	2901872	.	--	--	--	--	--	--	--
XLOC_012821	NW_018743196.1	2531648	2532010	.	--	--	--	--	--	--	--
XLOC_023123	NW_018744072.1	1538162	1538634	.	--	--	--	--	--	--	--
XLOC_034807	NW_018745174.1	443930	445090	.	--	hypothetical protein JCGZ_06349 [Jatropha curcas]	--	SubName: Full=Uncharacterized protein {ECO:0000313|EMBL:KDP37692.1};	--	GO:0048731,system development	--
XLOC_001830	NW_018742244.1	1473238	1473708	.	--	--	--	--	--	--	--
XLOC_018726	NW_018743697.1	4724518	4737243	+	K20790 nucleoside diphosphate kinase homolog 5 | (RefSeq) probable nucleoside diphosphate kinase 5 isoform X1 (A)	zinc finger BED domain-containing protein RICESLEEPER 2-like [Chenopodium quinoa]	RecName: Full=Zinc finger BED domain-containing protein RICESLEEPER 2; AltName: Full=Transposase-like protein RICESLEEPER 2;	SubName: Full=Uncharacterized protein {ECO:0000313|EMBL:EMJ14584.1};	Tam3-transposase (Ac family)	GO:0003700,DNA-binding transcription factor activity; GO:0005634,nucleus; GO:0009791,post-embryonic development; GO:0006357,regulation of transcription by RNA polymerase II; GO:0000977,RNA polymerase II regulatory region sequence-specific DNA binding; GO:0046983,protein dimerization activity; GO:0046872,metal ion binding; GO:0006351,transcription, DNA-templated	Nucleoside diphosphate kinase
XLOC_004995	NW_018742523.1	702467	706776	-	K19984 exocyst complex component 5 | (RefSeq) uncharacterized protein LOC113272286 (A)	PREDICTED: zinc finger BED domain-containing protein RICESLEEPER 1-like [Beta vulgaris subsp. vulgaris]	RecName: Full=Zinc finger BED domain-containing protein RICESLEEPER 1; AltName: Full=Transposase-like protein RICESLEEPER 1;	SubName: Full=zinc finger BED domain-containing protein RICESLEEPER 2-like isoform X1 {ECO:0000313|RefSeq:XP_008775563.2};	Tam3-transposase (Ac family)	GO:0003700,DNA-binding transcription factor activity; GO:0005634,nucleus; GO:0009791,post-embryonic development; GO:0006357,regulation of transcription by RNA polymerase II; GO:0000977,RNA polymerase II regulatory region sequence-specific DNA binding; GO:0046983,protein dimerization activity; GO:0046872,metal ion binding; GO:0006351,transcription, DNA-templated	Domain of unknown function (DUF4413)
XLOC_020130	NW_018743863.1	156007	156638	.	--	--	--	--	--	--	--
XLOC_033475	NW_018745024.1	7518609	7519788	+	--	--	--	--	--	--	--
XLOC_026937	NW_018744469.1	4164303	4164587	+	--	--	--	--	--	--	--
XLOC_011436	NW_018743050.1	594754	595498	.	--	uncharacterized protein LOC110787051 [Spinacia oleracea]	--	SubName: Full=uncharacterized protein LOC109014056 {ECO:0000313|RefSeq:XP_018851906.1};	--	--	--
XLOC_036556	NW_018745413.1	3297334	3300897	-	--	uncharacterized protein LOC110731388 [Chenopodium quinoa]	RecName: Full=Protein COP1 SUPPRESSOR 2 {ECO:0000303|PubMed:26714275};	SubName: Full=Uncharacterized protein {ECO:0000313|EMBL:KNA15070.1};	Uncharacterized conserved protein	GO:0016607,nuclear speck; GO:0010099,regulation of photomorphogenesis; GO:0080022,primary root development; GO:0055121,response to high fluence blue light stimulus by blue high-fluence system; GO:1904667,negative regulation of ubiquitin protein ligase activity	--
XLOC_006007	NW_018742616.1	4348484	4348758	.	--	uncharacterized protein LOC110707909 [Chenopodium quinoa]	--	--	--	--	--
XLOC_005343	NW_018742556.1	609147	609601	.	--	hypothetical protein SOVF_119290 [Spinacia oleracea]	--	SubName: Full=Uncharacterized protein {ECO:0000313|EMBL:KNA13162.1};	--	--	--
XLOC_028500	NW_018744620.1	1254651	1254895	.	--	--	--	--	--	--	--
XLOC_007602	NW_018742763.1	3604060	3606765	.	K05582 NAD(P)H-quinone oxidoreductase subunit K [EC:1.6.5.3] | (RefSeq) hypothetical protein (A)	NADH-plastoquinone oxidoreductase subunit K, partial (plastid) [Fragaria moschata]	RecName: Full=NAD(P)H-quinone oxidoreductase subunit K, chloroplastic {ECO:0000255|HAMAP-Rule:MF_01356}; EC=1.6.5.- {ECO:0000255|HAMAP-Rule:MF_01356}; AltName: Full=NAD(P)H dehydrogenase subunit K {ECO:0000255|HAMAP-Rule:MF_01356}; AltName: Full=NADH-plastoquinone oxidoreductase subunit K {ECO:0000255|HAMAP-Rule:MF_01356};	SubName: Full=NADH-plastoquinone oxidoreductase subunit K {ECO:0000313|EMBL:AFS35493.1}; Flags: Fragment;	NADH-ubiquinone oxidoreductase, NUFS7/PSST/20 kDa subunit	GO:0009535,chloroplast thylakoid membrane; GO:0008137,NADH dehydrogenase (ubiquinone) activity; GO:0048038,quinone binding; GO:0046872,metal ion binding; GO:0051539,4 iron, 4 sulfur cluster binding	--
XLOC_005413	NW_018742564.1	132167	132858	.	--	--	--	--	--	--	--
XLOC_027739	NW_018744537.1	494160	494441	.	--	--	--	--	--	--	--
XLOC_006710	NW_018742684.1	988011	988378	.	--	uncharacterized protein LOC110709127 isoform X2 [Chenopodium quinoa]	--	--	--	--	--
XLOC_036312	NW_018745403.1	72643	74031	+	K16292 KDEL-tailed cysteine endopeptidase [EC:3.4.22.-] | (RefSeq) vignain-like (A)	uncharacterized protein LOC110729410 [Chenopodium quinoa]	--	SubName: Full=uncharacterized protein LOC107921239 {ECO:0000313|RefSeq:XP_016706608.1};	--	--	--
XLOC_002372	NW_018742329.1	4942571	4943639	.	K03283 heat shock 70kDa protein 1/2/6/8 | (RefSeq) heat shock 70 kDa protein (A)	hypothetical protein [Beta vulgaris subsp. vulgaris]	RecName: Full=Putative ribonuclease H protein At1g65750; EC=3.1.26.4;	SubName: Full=Uncharacterized protein {ECO:0000313|EMBL:CCA66009.1};	FOG: Reverse transcriptase	GO:0046872,metal ion binding; GO:0004523,RNA-DNA hybrid ribonuclease activity; GO:0003676,nucleic acid binding	Reverse transcriptase-like
XLOC_032661	NW_018744996.1	1126703	1127557	+	--	--	--	--	--	--	--
XLOC_034809	NW_018745174.1	952338	953734	.	--	uncharacterized protein LOC110795995 [Spinacia oleracea]	--	SubName: Full=Uncharacterized protein {ECO:0000313|EMBL:KNA07853.1};	--	--	--
XLOC_019364	NW_018743792.1	8064815	8065539	.	--	--	--	--	--	--	--
XLOC_012578	NW_018743175.1	5263511	5266900	-	K01853 cycloartenol synthase [EC:5.4.99.8] | (RefSeq) cycloartenol synthase 2-like (A)	cycloartenol synthase 2-like [Chenopodium quinoa]	RecName: Full=Cycloartenol synthase 2; EC=5.4.99.8;	SubName: Full=Cycloartenol synthase {ECO:0000313|EMBL:PIN01960.1}; EC=5.4.99.8 {ECO:0000313|EMBL:PIN01960.1};	Oxidosqualene-lanosterol cyclase and related proteins	GO:0016871,cycloartenol synthase activity; GO:0010686,tetracyclic triterpenoid biosynthetic process	--
XLOC_034343	NW_018745080.1	2457656	2458289	.	--	--	--	--	--	--	--
XLOC_013836	NW_018743218.1	799358	799776	.	--	--	--	--	--	--	--
XLOC_024945	NW_018744239.1	8740455	8741288	+	--	--	--	--	--	--	--
XLOC_023026	NW_018744069.1	1747455	1748376	+	K20537 mitogen-activated protein kinase 7/14 [EC:2.7.11.24] | (RefSeq) mitogen-activated protein kinase 7-like (A)	uncharacterized protein LOC110729946 [Chenopodium quinoa]	--	SubName: Full=Uncharacterized protein {ECO:0000313|EMBL:CCA66040.1};	--	GO:0003676,nucleic acid binding	--
XLOC_038379	NW_018745584.1	1095538	1099648	+	--	hypothetical protein CDL15_Pgr008849 [Punica granatum]	RecName: Full=Formin-like protein 20; Short=AtFH20;	RecName: Full=Formin-like protein {ECO:0000256|RuleBase:RU361260};	--	GO:0004721,phosphoprotein phosphatase activity	--
XLOC_014900	NW_018743292.1	1485170	1486974	-	--	--	--	--	--	--	--
XLOC_018412	NW_018743689.1	831203	831566	.	--	--	--	--	--	--	--
XLOC_005034	NW_018742523.1	2716220	2716624	.	K19984 exocyst complex component 5 | (RefSeq) uncharacterized protein LOC113272286 (A)	zinc finger BED domain-containing protein RICESLEEPER 1-like [Spinacia oleracea]	RecName: Full=Putative AC9 transposase;	SubName: Full=Uncharacterized protein {ECO:0000313|EMBL:KNA05978.1}; Flags: Fragment;	Tam3-transposase (Ac family)	GO:0006310,DNA recombination; GO:0046983,protein dimerization activity; GO:0032196,transposition; GO:0003677,DNA binding	--
[truncated: 2,653 more rows]
