# Supplementary material for: Elucidating the Differentiation Synthesis Mechanisms of Differently Colored Resistance Quinoa Seedings Using Metabolite Profiling and Transcriptome Analysis
Source: Metabolites. 2023 Oct 10;13(10):1065. doi: 10.3390/metabo13101065 (PMC10609267; doi:10.3390/metabo13101065)
Supplement: Supplementary file 1 [file metabolites-13-01065-s001.zip › Table S22.xlsx]

## Sheet: Sheet1
Table S22 O2PLS analysis (transcriptome loading map)
ID	KEGG	loading 1	loading 2	length
gene-LOC110739736	--	-0.00690036	0.0200954	0.0212471
gene-LOC110698240	--	-0.00300141	-0.0209506	0.0211645
gene-LOC110700957	K00253 isovaleryl-CoA dehydrogenase [EC:1.3.8.4] | (RefSeq) isovaleryl-CoA dehydrogenase, mitochondrial-like (A)	-0.00643678	0.0196413	0.0206692
gene-LOC110714587	K12133 MYB-related transcription factor LHY | (RefSeq) protein LHY-like isoform X1 (A)	0.00275638	-0.0203705	0.0205561
gene-LOC110730332	K16911 ATP-dependent RNA helicase DDX21 [EC:3.6.4.13] | (RefSeq) DEAD-box ATP-dependent RNA helicase 7-like (A)	-0.00296471	0.0203237	0.0205388
gene-LOC110711150	K15363 fanconi-associated nuclease 1 [EC:3.1.21.- 3.1.4.1] | (RefSeq) fanconi-associated nuclease 1 homolog (A)	-0.00600459	0.0195349	0.0204369
gene-LOC110712149	K13071 pheophorbide a oxygenase [EC:1.14.15.17] | (RefSeq) pheophorbide a oxygenase, chloroplastic-like (A)	-0.00499696	-0.0195623	0.0201905
gene-LOC110687973	K12135 zinc finger protein CONSTANS | (RefSeq) zinc finger protein CONSTANS-like (A)	0.01054	-0.0170579	0.0200515
gene-LOC110715543	K20617 cytochrome P450 family 71 subfamily A | (RefSeq) cytochrome P450 71A1-like (A)	-0.00718079	0.0187016	0.0200328
gene-LOC110715592	K08712 ATP-binding cassette, subfamily G (WHITE), member 2, SNQ2 | (RefSeq) ABC transporter ATP-binding protein/permease PDR18-like (A)	-0.00792056	0.0183888	0.0200221
gene-LOC110702624	K23541 Ca2+/H+ antiporter, TMEM165/GDT1 family | (RefSeq) pentatricopeptide repeat-containing protein At3g24000, mitochondrial-like (A)	-0.00177685	0.0198635	0.0199428
gene-LOC110736661	--	-0.00112397	-0.0198681	0.0198998
gene-LOC110691491	K22262 WD repeat and FYVE domain-containing protein 3 | (RefSeq) protein SPIRRIG (A)	-0.000350389	0.01981	0.0198131
gene-LOC110723702	--	0.00140364	0.0197574	0.0198072
gene-LOC110686832	--	-0.00317021	0.019522	0.0197777
gene-LOC110739983	--	-0.00611982	0.0187895	0.019761
gene-LOC110713920	--	-0.00840234	0.0177553	0.0196431
gene-LOC110697975	K05284 GPI mannosyltransferase 1 subunit M [EC:2.4.1.-] | (RefSeq) GPI mannosyltransferase 1-like (A)	0.00102605	0.0196049	0.0196318
gene-LOC110732562	K16302 metal transporter CNNM | (RefSeq) Protein MAM3 (A)	-0.000426513	0.0195978	0.0196024
gene-LOC110733659	K00728 dolichyl-phosphate-mannose-protein mannosyltransferase [EC:2.4.1.109] | (RefSeq) dolichyl-phosphate-mannose--protein mannosyltransferase 1-like (A)	0.00382748	-0.0192125	0.0195901
gene-LOC110698054	--	-0.00772978	0.0179535	0.0195468
gene-LOC110692837	K06630 14-3-3 protein epsilon | (RefSeq) 14-3-3-like protein D (A)	-0.00749637	0.0180063	0.0195044
gene-LOC110686616	--	-0.00251855	-0.0193129	0.0194764
gene-LOC110715010	--	0.00235316	0.0193233	0.0194661
gene-LOC110736719	K19525 vacuolar protein sorting-associated protein 13A/C | (RefSeq) hypothetical protein (A)	-0.00676863	0.0182257	0.019442
gene-LOC110683189	K05349 beta-glucosidase [EC:3.2.1.21] | (RefSeq) uncharacterized protein LOC110683189 (A)	-0.0108846	0.0161067	0.0194397
gene-LOC110724752	K12309 beta-galactosidase [EC:3.2.1.23] | (RefSeq) beta-galactosidase 2 isoform X1 (A)	-0.0118546	0.0153749	0.0194144
gene-LOC110739121	--	0.00169715	0.0192958	0.0193703
gene-LOC110738902	K15032 mTERF domain-containing protein, mitochondrial | (RefSeq) transcription termination factor MTERF15, mitochondrial-like (A)	-0.00163862	0.0192721	0.0193417
gene-LOC110732645	K19995 secretory carrier-associated membrane protein | (RefSeq) secretory carrier-associated membrane protein 4-like (A)	-0.00522384	0.0185924	0.0193123
gene-LOC110712572	K10999 cellulose synthase A [EC:2.4.1.12] | (RefSeq) cellulose synthase A catalytic subunit 4 [UDP-forming] isoform X1 (A)	-0.00749674	0.0177576	0.0192752
gene-LOC110731197	K12486 stromal membrane-associated protein | (RefSeq) ADP-ribosylation factor GTPase-activating protein AGD12-like isoform X1 (A)	-0.00493469	0.0186265	0.0192691
gene-LOC110736214	K03319 divalent anion:Na+ symporter, DASS family | (RefSeq) dicarboxylate transporter 2.1, chloroplastic-like (A)	0.00183462	-0.0191598	0.0192475
gene-LOC110719677	K01179 endoglucanase [EC:3.2.1.4] | (RefSeq) uncharacterized protein LOC112521754 (A)	-0.00876642	0.0171109	0.0192258
gene-LOC110705018	K14165 atypical dual specificity phosphatase [EC:3.1.3.16 3.1.3.48] | (RefSeq) similar to dual-specificity phosphatase laforin (A)	-0.00690831	0.0179273	0.0192124
gene-LOC110731844	K23490 cytochrome b5 | (RefSeq) cytochrome b5, seed isoform-like (A)	0.0128106	-0.0142645	0.0191726
gene-LOC110681752	K03319 divalent anion:Na+ symporter, DASS family | (RefSeq) LOW QUALITY PROTEIN: dicarboxylate transporter 2.1, chloroplastic-like (A)	0.00809427	-0.017353	0.019148
gene-LOC110735797	K01637 isocitrate lyase [EC:4.1.3.1] | (RefSeq) isocitrate lyase-like (A)	0.00975006	-0.0164449	0.019118
gene-LOC110734200	K13648 alpha-1,4-galacturonosyltransferase [EC:2.4.1.43] | (RefSeq) probable galacturonosyltransferase 3 isoform X1 (A)	-0.00581172	0.0182035	0.0191087
gene-LOC110686438	--	-0.00714033	0.0176731	0.019061
gene-LOC110700652	--	-0.00987421	0.0162539	0.0190181
gene-LOC110714653	K23810 (E)-8-carboxylinalool synthase [EC:1.14.14.-] | (RefSeq) geraniol 8-hydroxylase (A)	-0.00758201	0.0174189	0.0189975
gene-LOC110727592	--	-0.00260654	0.0188092	0.0189889
gene-LOC110723181	K00555 tRNA (guanine26-N2/guanine27-N2)-dimethyltransferase [EC:2.1.1.215 2.1.1.216] | (RefSeq) uncharacterized protein LOC110723181 (A)	0.00332664	0.0186866	0.0189804
gene-LOC110726737	--	0.00539579	-0.0181797	0.0189636
gene-LOC110719306	K15688 E3 ubiquitin-protein ligase MUL1 [EC:2.3.2.27] | (RefSeq) mitochondrial ubiquitin ligase activator of NFKB 1-like (A)	-0.00774355	0.0172844	0.0189397
gene-LOC110736317	--	-0.00441468	0.018399	0.0189213
gene-LOC110705104	--	-0.0111652	0.0152745	0.0189202
gene-LOC110732537	K15109 solute carrier family 25 (mitochondrial carnitine/acylcarnitine transporter), member 20/29 | (RefSeq) mitochondrial carnitine/acylcarnitine carrier-like protein (A)	0.00823947	-0.0169709	0.0188653
gene-LOC110684225	K00487 trans-cinnamate 4-monooxygenase [EC:1.14.14.91] | (RefSeq) trans-cinnamate 4-monooxygenase-like (A)	0.00893916	-0.0165596	0.0188183
gene-LOC110706197	K00799 glutathione S-transferase [EC:2.5.1.18] | (RefSeq) uncharacterized protein LOC110786294 (A)	-0.00146893	-0.0187397	0.0187972
gene-LOC110688205	K09842 abscisic-aldehyde oxidase [EC:1.2.3.14] | (RefSeq) abscisic-aldehyde oxidase-like (A)	-0.000699956	0.0187459	0.018759
gene-LOC110699354	--	-0.00887335	0.0165165	0.0187491
gene-LOC110688825	K05349 beta-glucosidase [EC:3.2.1.21] | (RefSeq) uncharacterized protein LOC110688825 (A)	-0.00699867	0.0173667	0.0187239
gene-LOC110710493	--	-0.00721287	0.0172735	0.018719
gene-LOC110738524	K23280 rhamnogalacturonan I rhamnosyltransferase [EC:2.4.1.351] | (RefSeq) uncharacterized protein At1g04910 (A)	-0.00981887	0.0158903	0.0186792
gene-LOC110699356	--	-0.0097286	0.0159421	0.0186761
gene-LOC110715339	K21604 jasmonoyl-L-amino acid hydrolase [EC:3.5.1.127] | (RefSeq) LOW QUALITY PROTEIN: IAA-amino acid hydrolase ILR1-like 4 (A)	-0.00962381	0.0160051	0.0186757
gene-LOC110728084	K08511 vesicle-associated membrane protein 72 | (RefSeq) vesicle-associated membrane protein 722-like (A)	0.00202112	-0.0185465	0.0186563
gene-LOC110703365	K11996 adenylyltransferase and sulfurtransferase [EC:2.7.7.80 2.8.1.11] | (RefSeq) adenylyltransferase and sulfurtransferase MOCS3-like (A)	0.0126154	-0.0137197	0.018638
gene-LOC110684011	--	0.00400408	0.0181658	0.0186018
gene-LOC110718285	K14498 serine/threonine-protein kinase SRK2 [EC:2.7.11.1] | (RefSeq) serine/threonine-protein kinase SRK2I-like (A)	-0.00525791	0.0178364	0.0185953
gene-LOC110708361	--	-0.00924592	0.0161315	0.0185934
gene-LOC110699692	--	-0.00441138	0.0180467	0.0185781
gene-LOC110737740	K00451 homogentisate 1,2-dioxygenase [EC:1.13.11.5] | (RefSeq) homogentisate 1,2-dioxygenase-like isoform X1 (A)	-0.00960556	0.0158972	0.0185738
gene-LOC110718586	--	-0.00928051	0.0160877	0.0185726
gene-LOC110686639	--	-0.00409946	0.0181105	0.0185686
gene-LOC110720321	K00847 fructokinase [EC:2.7.1.4] | (RefSeq) probable fructokinase-6, chloroplastic (A)	-0.00933128	0.0160327	0.0185505
gene-LOC110728529	K14003 prolactin regulatory element-binding protein | (RefSeq) SEC12-like protein 1 (A)	-0.010895	0.0150036	0.0185421
gene-LOC110693176	K15803 (-)-germacrene D synthase [EC:4.2.3.75] | (RefSeq) probable sesquiterpene synthase (A)	0.00169215	0.0184423	0.0185198
gene-LOC110685836	K08900 mitochondrial chaperone BCS1 | (RefSeq) hypothetical protein (A)	-0.00464263	0.0179122	0.0185041
gene-LOC110698461	K13195 cold-inducible RNA-binding protein | (RefSeq) glycine-rich RNA-binding protein-like (A)	-0.0053371	0.017705	0.0184919
gene-LOC110735784	K16297 serine carboxypeptidase-like clade II [EC:3.4.16.-] | (RefSeq) serine carboxypeptidase-like 42 (A)	-0.0012644	0.0184383	0.0184816
gene-LOC110710649	K03671 thioredoxin 1 | (RefSeq) thioredoxin Y2, chloroplastic-like (A)	-0.00829885	0.0165052	0.0184741
gene-LOC110730188	K15109 solute carrier family 25 (mitochondrial carnitine/acylcarnitine transporter), member 20/29 | (RefSeq) mitochondrial carnitine/acylcarnitine carrier-like protein (A)	0.00907971	-0.016085	0.0184707
gene-LOC110697366	K03452 magnesium/proton exchanger | (RefSeq) uncharacterized LOC18613571 (A)	0.00212096	0.0183359	0.0184582
gene-LOC110728395	K17609 nucleoredoxin [EC:1.8.1.8] | (RefSeq) hypothetical protein (A)	-0.00123978	0.0184164	0.018458
gene-LOC110718364	--	0.0118396	-0.0141466	0.0184473
gene-LOC110726443	K16222 Dof zinc finger protein DOF5.5 | (RefSeq) cyclic dof factor 1 (A)	0.00109953	-0.0184051	0.0184379
gene-LOC110697055	K22133 oxalate---CoA ligase [EC:6.2.1.8] | (RefSeq) oxalate--CoA ligase-like (A)	0.00239404	-0.0182552	0.0184115
gene-LOC110730880	K10144 RING finger and CHY zinc finger domain-containing protein 1 [EC:2.3.2.27] | (RefSeq) E3 ubiquitin-protein ligase RZFP34-like (A)	-0.00137301	0.0183537	0.018405
gene-LOC110728959	K14497 protein phosphatase 2C [EC:3.1.3.16] | (RefSeq) probable protein phosphatase 2C 8 isoform X1 (A)	0.00240162	0.0182389	0.0183964
gene-LOC110729750	K22097 3-O-acetylpapaveroxine carboxylesterase [EC:3.1.1.105] | (RefSeq) carboxylesterase 1-like (A)	0.00519904	0.0176433	0.0183933
gene-LOC110740333	K04371 mitogen-activated protein kinase 1/3 [EC:2.7.11.24] | (RefSeq) mitogen-activated protein kinase homolog NTF6-like (A)	0.00601716	0.0173717	0.0183843
gene-LOC110694683	K00924 kinase [EC:2.7.1.-] | (RefSeq) probable serine/threonine-protein kinase CST (A)	-0.0105166	0.0150725	0.0183788
gene-LOC110707380	--	0.000234668	0.0183751	0.0183766
gene-LOC110693857	K00521 ferric-chelate reductase [EC:1.16.1.7] | (RefSeq) ferric reduction oxidase 4-like (A)	-0.00948398	0.0157366	0.0183735
gene-LOC110692042	--	0.00086014	0.0183516	0.0183718
gene-LOC110687785	K22794 flavonol-3-O-glucoside/galactoside glucosyltransferase [EC:2.4.1.239 2.4.1.-] | (RefSeq) anthocyanidin 3-O-glucoside 2''-O-glucosyltransferase-like (A)	-0.00671945	-0.0170719	0.0183467
gene-LOC110730085	K01904 4-coumarate--CoA ligase [EC:6.2.1.12] | (RefSeq) 4-coumarate--CoA ligase-like 6 (A)	0.00098404	0.018317	0.0183434
gene-LOC110712641	K02881 large subunit ribosomal protein L18 | (RefSeq) uncharacterized protein LOC112282710 isoform X1 (A)	-0.00391622	0.0179128	0.0183359
gene-LOC110733585	--	-0.00586	0.0173627	0.018325
gene-LOC110698934	K18812 cyclin D6, plant | (RefSeq) cyclin-D3-1-like isoform X1 (A)	-0.00516676	0.0175682	0.0183122
gene-LOC110737394	K05349 beta-glucosidase [EC:3.2.1.21] | (RefSeq) uncharacterized protein LOC110737394 (A)	0.000695393	0.0182961	0.0183093
gene-LOC110721850	K01051 pectinesterase [EC:3.1.1.11] | (RefSeq) pectinesterase/pectinesterase inhibitor PPE8B-like (A)	0.00151201	0.0182404	0.018303
gene-LOC110726777	K12741 heterogeneous nuclear ribonucleoprotein A1/A3 | (RefSeq) RNA-binding protein Musashi homolog 2 (A)	0.0107968	-0.0147595	0.018287
gene-LOC110724829	K10615 E3 ubiquitin-protein ligase HERC4 [EC:2.3.2.26] | (RefSeq) probable E3 ubiquitin-protein ligase HERC4 isoform X1 (A)	-0.00579635	-0.0173079	0.0182527
gene-LOC110688423	--	0.00617435	0.0171593	0.0182364
gene-LOC110701199	K03884 NADH-ubiquinone oxidoreductase chain 6 [EC:7.1.1.2] | (RefSeq) uncharacterized protein LOC109243048 (A)	-0.00961953	0.0154765	0.0182225
gene-LOC110701606	K00434 L-ascorbate peroxidase [EC:1.11.1.11] | (RefSeq) L-ascorbate peroxidase, cytosolic (A)	0.0116881	-0.01397	0.0182146
gene-LOC110722297	K00966 mannose-1-phosphate guanylyltransferase [EC:2.7.7.13] | (RefSeq) mannose-1-phosphate guanylyltransferase 1-like (A)	0.0048098	-0.0175587	0.0182056
gene-LOC110727148	--	0.0110614	-0.0144329	0.0181841
gene-LOC110704426	K08900 mitochondrial chaperone BCS1 | (RefSeq) AAA-ATPase ASD, mitochondrial-like (A)	0.00921312	-0.0156692	0.0181771
gene-LOC110685184	K18643 katanin p80 WD40 repeat-containing subunit B1 | (RefSeq) uncharacterized LOC105795008 (A)	-0.00344841	0.0178463	0.0181764
gene-LOC110739100	K09838 zeaxanthin epoxidase [EC:1.14.15.21] | (RefSeq) zeaxanthin epoxidase, chloroplastic (A)	-0.0100821	0.0151138	0.018168
gene-LOC110693821	K23717 solute carrier family 23 (nucleobase transporter), member 2 | (RefSeq) nucleobase-ascorbate transporter 4-like (A)	-0.0110556	0.014406	0.0181593
gene-LOC110713129	K02218 casein kinase 1 [EC:2.7.11.1] | (RefSeq) uncharacterized protein LOC8069780 (A)	-0.0085408	-0.0160234	0.0181575
gene-LOC110693165	--	-0.00968959	0.0153362	0.0181408
gene-LOC110724825	K06630 14-3-3 protein epsilon | (RefSeq) 14-3-3-like protein (A)	-0.00526749	-0.0173395	0.0181219
gene-LOC110710138	K12761 carbon catabolite-derepressing protein kinase [EC:2.7.11.1] | (RefSeq) CBL-interacting serine/threonine-protein kinase 4-like (A)	0.0117896	-0.0137566	0.0181174
gene-LOC110736707	K15281 solute carrier family 35 | (RefSeq) uncharacterized protein LOC110779446 (A)	-0.0106102	0.0146693	0.0181043
gene-LOC110738904	--	-0.0109977	0.0143804	0.0181037
gene-LOC110693566	K01054 acylglycerol lipase [EC:3.1.1.23] | (RefSeq) caffeoylshikimate esterase-like (A)	0.00887831	-0.0157761	0.0181027
gene-LOC110734485	K09422 transcription factor MYB, plant | (RefSeq) uncharacterized LOC100262866 (A)	-0.00446732	0.0175358	0.0180959
gene-LOC110721445	K10870 RAD51-like protein 2 | (RefSeq) DNA repair protein RAD51 homolog 3-like (A)	3.51571e-05	0.0180883	0.0180883
gene-LOC110702245	K12761 carbon catabolite-derepressing protein kinase [EC:2.7.11.1] | (RefSeq) CBL-interacting serine/threonine-protein kinase 4-like (A)	0.011593	-0.0138712	0.0180779
gene-LOC110708362	K14509 ethylene receptor [EC:2.7.13.-] | (RefSeq) protein EIN4-like (A)	-0.00599645	0.0170317	0.0180565
gene-LOC110695886	K22369 epoxide hydrolase 4 [EC:3.3.-.-] | (RefSeq) alpha/beta-hydrolase (A)	0.00772543	-0.0163138	0.0180505
gene-LOC110723916	K15223 upstream activation factor subunit UAF30 | (RefSeq) upstream activation factor subunit spp27 (A)	-0.00519147	0.0172724	0.0180357
gene-LOC110705092	K13195 cold-inducible RNA-binding protein | (RefSeq) glycine-rich RNA-binding protein-like (A)	-0.00412213	0.0175426	0.0180204
gene-LOC110688278	K15535 phosphoglucan, water dikinase [EC:2.7.9.5] | (RefSeq) PWD1; phosphoglucan water dikinase (A)	0.00528303	-0.0172262	0.0180181
gene-LOC110716577	--	0.00320477	0.0177179	0.0180054
gene-LOC110732384	K16911 ATP-dependent RNA helicase DDX21 [EC:3.6.4.13] | (RefSeq) DEAD-box ATP-dependent RNA helicase 7-like (A)	-0.00121074	0.017935	0.0179759
gene-LOC110720633	K01805 xylose isomerase [EC:5.3.1.5] | (RefSeq) xylose isomerase-like isoform X1 (A)	-0.00815761	0.0160145	0.0179725
gene-LOC110716578	K01183 chitinase [EC:3.2.1.14] | (RefSeq) endochitinase EP3-like (A)	-0.00355097	0.0176173	0.0179716
gene-LOC110702015	K20471 coatomer subunit delta | (RefSeq) coatomer subunit delta-3-like (A)	0.00528858	-0.0171596	0.0179561
gene-LOC110692845	--	-0.00300332	0.0177028	0.0179558
gene-LOC110735348	--	-0.00729312	-0.0164048	0.0179529
gene-LOC110724287	K13148 integrator complex subunit 11 [EC:3.1.27.-] | (RefSeq) cleavage and polyadenylation specificity factor subunit 3-II-like isoform X1 (A)	-0.00761787	0.016256	0.0179524
gene-LOC110714912	K00600 glycine hydroxymethyltransferase [EC:2.1.2.1] | (RefSeq) serine hydroxymethyltransferase 4-like (A)	0.00275204	-0.0177352	0.0179475
gene-LOC110709739	K23541 Ca2+/H+ antiporter, TMEM165/GDT1 family | (RAP-DB) Os07g0239600; Pentatricopeptide repeat domain containing protein. (A)	0.00768888	0.0162097	0.0179409
gene-LOC110730567	--	-0.000104089	0.0179326	0.017933
gene-LOC110711143	K12133 MYB-related transcription factor LHY | (RefSeq) protein CCA1 (A)	0.0118875	-0.0134144	0.0179237
gene-LOC110732268	K20471 coatomer subunit delta | (RefSeq) coatomer subunit delta-3-like (A)	0.00807259	-0.0160025	0.0179233
gene-LOC110686708	--	-0.000462325	0.0179131	0.0179191
gene-LOC110724774	K20535 mitogen-activated protein kinase 1/2 [EC:2.7.11.24] | (RefSeq) mitogen-activated protein kinase homolog NTF3 (A)	-0.00932676	0.0152766	0.0178986
gene-LOC110713703	K22374 3''-deamino-3''-oxonicotianamine reductase [EC:1.1.1.285] | (RefSeq) LOW QUALITY PROTEIN: non-functional NADPH-dependent codeinone reductase 2-like (A)	-0.00781531	0.0160977	0.0178946
gene-LOC110727830	K15032 mTERF domain-containing protein, mitochondrial | (RefSeq) LOW QUALITY PROTEIN: transcription termination factor MTERF5, chloroplastic (A)	0.000234724	0.01789	0.0178915
gene-LOC110737699	--	-0.00206738	-0.0177626	0.0178825
gene-LOC110730817	--	-0.00937225	0.0152226	0.0178765
gene-LOC110684265	K22262 WD repeat and FYVE domain-containing protein 3 | (RefSeq) protein SPIRRIG (A)	-0.00615544	0.0167815	0.0178748
gene-LOC110726239	K00799 glutathione S-transferase [EC:2.5.1.18] | (RefSeq) glutathione S-transferase U9-like (A)	-0.0034239	-0.0175406	0.0178716
gene-LOC110716330	--	0.00165427	-0.0177853	0.0178621
gene-LOC110690956	K19090 CRISPR-associated protein Cas5t | (RefSeq) putative pentatricopeptide repeat-containing protein At3g05240 (A)	-0.00123051	0.0178163	0.0178588
gene-LOC110721028	K01051 pectinesterase [EC:3.1.1.11] | (RefSeq) pectinesterase-like (A)	-0.0042414	0.0173461	0.0178571
gene-LOC110703690	--	0.00661654	-0.0165829	0.0178541
gene-LOC110709820	K10355 actin, other eukaryote | (RefSeq) actin-7-like (A)	0.0123196	-0.012922	0.0178536
gene-LOC110727071	K13024 inositol-hexakisphosphate/diphosphoinositol-pentakisphosphate 1-kinase [EC:2.7.4.24] | (RefSeq) inositol hexakisphosphate and diphosphoinositol-pentakisphosphate kinase VIP2-like isoform X1 (A)	-0.00888114	0.0154856	0.0178516
gene-LOC110717893	K17710 pentatricopeptide repeat domain-containing protein 1 | (RefSeq) ppr10; pentatricopeptide repeat10 (A)	-0.00959952	0.0150375	0.0178403
gene-LOC110696285	--	0.0139699	-0.0110899	0.0178366
gene-LOC110739284	K22733 magnesium transporter | (RefSeq) uncharacterized protein LOC105630380 (A)	-0.00290074	0.0175983	0.0178358
gene-LOC110687834	K07418 cytochrome P450 family 2 subfamily J [EC:1.14.14.1 1.14.14.73 1.14.14.74 1.14.14.75] | (RefSeq) cytochrome P450 71A26-like (A)	-0.00342101	-0.0174876	0.0178191
gene-LOC110726352	K18663 activating signal cointegrator complex subunit 3 [EC:3.6.4.12] | (RefSeq) DExH-box ATP-dependent RNA helicase DExH14-like isoform X1 (A)	0.0075033	0.0161602	0.0178172
gene-LOC110690791	K17964 leucine-rich PPR motif-containing protein, mitochondrial | (RefSeq) hypothetical protein (A)	-0.00325825	0.0175135	0.017814
gene-LOC110733056	K10658 E3 ubiquitin-protein ligase MARCH3 [EC:2.3.2.27] | (RefSeq) E3 ubiquitin-protein ligase MARCH3 (A)	0.000500781	0.0177964	0.0178035
gene-LOC110693698	--	0.00871096	0.0155038	0.0177834
gene-LOC110720029	K12173 BRCA1-A complex subunit BRE | (RefSeq) BRCA1-A complex subunit BRE-like (A)	0.00661585	0.016506	0.0177825
gene-LOC110703808	K21630 GATA-type zinc finger protein 1 | (RefSeq) GATA transcription factor 6-like (A)	0.0112012	-0.0138112	0.0177825
gene-LOC110736462	K05391 cyclic nucleotide gated channel, plant | (RefSeq) cyclic nucleotide-gated ion channel 1-like (A)	-0.0122293	0.0129057	0.0177796
gene-LOC110702661	K11805 WD repeat-containing protein 68 | (RefSeq) WD repeat-containing protein LWD1 (A)	-0.00921459	0.0151931	0.017769
gene-LOC110721627	K00121 S-(hydroxymethyl)glutathione dehydrogenase / alcohol dehydrogenase [EC:1.1.1.284 1.1.1.1] | (RefSeq) alcohol dehydrogenase-like 7 (A)	-0.00679217	0.0164155	0.0177652
gene-LOC110735749	K22395 cinnamyl-alcohol dehydrogenase [EC:1.1.1.195] | (RefSeq) berberine bridge enzyme-like 13 (A)	-0.00301273	0.0174977	0.0177552
gene-LOC110704993	--	-0.00768532	0.0160049	0.0177544
gene-LOC110719957	K00854 xylulokinase [EC:2.7.1.17] | (RefSeq) xylulose kinase-like (A)	-0.0103944	0.014393	0.0177539
gene-LOC110730872	K04565 superoxide dismutase, Cu-Zn family [EC:1.15.1.1] | (RefSeq) superoxide dismutase [Cu-Zn], chloroplastic (A)	-0.0120606	0.0130112	0.0177412
gene-LOC110721574	--	0.0048403	-0.0170655	0.0177386
gene-LOC110683198	--	0.00841641	0.0156113	0.0177356
gene-LOC110728949	K01051 pectinesterase [EC:3.1.1.11] | (RefSeq) pectinesterase 1-like (A)	0.00119113	0.0176712	0.0177113
gene-LOC110699592	K13248 pyridoxal phosphate phosphatase PHOSPHO2 [EC:3.1.3.74] | (RefSeq) inorganic pyrophosphatase 1-like (A)	0.00379851	-0.0172924	0.0177047
gene-LOC110735748	K22395 cinnamyl-alcohol dehydrogenase [EC:1.1.1.195] | (RefSeq) berberine bridge enzyme-like 13 (A)	-0.00824719	0.0156642	0.0177026
gene-LOC110702126	--	-0.00197865	0.0175806	0.0176916
gene-LOC110735796	K01637 isocitrate lyase [EC:4.1.3.1] | (RefSeq) isocitrate lyase-like (A)	0.00956597	-0.0148756	0.0176859
gene-LOC110695803	K15919 glyoxylate/hydroxypyruvate reductase [EC:1.1.1.79 1.1.1.81] | (RefSeq) glyoxylate/hydroxypyruvate reductase HPR3-like (A)	-0.008145	0.0156977	0.017685
gene-LOC110717753	--	-0.00655584	-0.0164249	0.0176849
gene-LOC110703267	--	0.0104092	-0.0142894	0.0176788
gene-LOC110691094	K01805 xylose isomerase [EC:5.3.1.5] | (RefSeq) xylose isomerase (A)	-0.00978232	0.0147238	0.0176772
gene-LOC110723470	--	-0.000842821	0.0176519	0.017672
gene-LOC110702169	--	-0.00998065	0.0145826	0.017671
gene-LOC110708683	K13511 monolysocardiolipin acyltransferase [EC:2.3.1.-] | (RefSeq) uncharacterized protein LOC110708683 (A)	-0.00860776	0.0154326	0.0176709
gene-LOC110706338	--	-0.00441953	0.0170992	0.0176612
gene-LOC110736749	K07893 Ras-related protein Rab-6A | (RefSeq) ras-related protein RABH1b-like (A)	-0.00839989	0.0155313	0.0176573
gene-LOC110737872	--	0.00904656	0.0151469	0.0176428
gene-LOC110693267	K10666 E3 ubiquitin-protein ligase RNF5 [EC:2.3.2.27] | (RefSeq) E3 ubiquitin-protein ligase RMA3-like (A)	-0.00803029	0.0157074	0.0176411
gene-LOC110738115	K10773 endonuclease III [EC:4.2.99.18] | (RefSeq) hypothetical protein (A)	0.00521786	0.0168429	0.0176327
gene-LOC110706684	K22422 protein downstream neighbor of Son | (RefSeq) hypothetical protein (A)	0.00964781	-0.0147571	0.017631
gene-LOC110726429	--	0.0111109	0.013689	0.0176307
gene-LOC110693896	K21370 baicalein 7-O-glucuronosyltransferase [EC:2.4.1.253] | (RefSeq) baicalein 7-O-glucuronosyltransferase-like (A)	0.00695671	0.0161829	0.0176148
gene-LOC110682257	K14498 serine/threonine-protein kinase SRK2 [EC:2.7.11.1] | (RefSeq) serine/threonine-protein kinase SRK2I-like (A)	-0.00547395	0.0167419	0.017614
gene-LOC110688025	K00921 1-phosphatidylinositol-3-phosphate 5-kinase [EC:2.7.1.150] | (RefSeq) 1-phosphatidylinositol-3-phosphate 5-kinase FAB1B-like (A)	-0.00576759	0.0166419	0.017613
gene-LOC110697474	--	0.000639006	0.0175982	0.0176098
gene-LOC110726910	K00306 sarcosine oxidase / L-pipecolate oxidase [EC:1.5.3.1 1.5.3.7] | (RefSeq) probable sarcosine oxidase (A)	-0.0100584	0.0144444	0.0176015
gene-LOC110731225	K20855 beta-1,3-galactosyltransferase 1/2/3/4/5/7/8 [EC:2.4.1.-] | (RefSeq) probable beta-1,3-galactosyltransferase 4 isoform X1 (A)	0.0135214	-0.0112486	0.0175886
gene-LOC110737846	--	0.00876397	0.0152469	0.0175863
gene-LOC110692575	--	0.000761715	0.0175645	0.017581
gene-LOC110684355	--	-0.00706045	0.0160958	0.0175762
gene-LOC110729882	K14376 poly(A) polymerase [EC:2.7.7.19] | (RefSeq) nuclear poly(A) polymerase 4-like (A)	-0.00476095	0.0169191	0.0175762
gene-LOC110734375	K03452 magnesium/proton exchanger | (RefSeq) uncharacterized LOC18613571 (A)	0.00204885	0.0174531	0.0175729
gene-LOC110733458	K23877 xyloglucan O-acetyltransferase | (RefSeq) hypothetical protein (A)	0.00624193	-0.016426	0.017572
gene-LOC110697115	K03781 catalase [EC:1.11.1.6] | (RefSeq) catalase-domain-containing protein (A)	0.00727685	-0.0159807	0.0175594
gene-LOC110729592	K15746 beta-carotene 3-hydroxylase [EC:1.14.15.24] | (RefSeq) beta-carotene hydroxylase 2, chloroplastic-like (A)	0.0126884	-0.0121359	0.0175577
gene-LOC110687877	K17710 pentatricopeptide repeat domain-containing protein 1 | (RefSeq) putative pentatricopeptide repeat-containing protein At2g02150 (A)	-0.00238307	0.0173923	0.0175548
gene-LOC110715689	K03517 quinolinate synthase [EC:2.5.1.72] | (RefSeq) quinolinate synthase, chloroplastic-like (A)	0.00915405	-0.0149786	0.0175544
gene-LOC110721597	K05665 ATP-binding cassette, subfamily C (CFTR/MRP), member 1 [EC:7.6.2.3] | (RefSeq) putative ABC transporter C family member 15 (A)	0.00887604	-0.0151387	0.0175489
gene-LOC110735739	K01590 histidine decarboxylase [EC:4.1.1.22] | (RefSeq) serine decarboxylase-like (A)	0.00983271	-0.0145306	0.0175448
gene-LOC110700588	K00799 glutathione S-transferase [EC:2.5.1.18] | (RefSeq) glutathione S-transferase U9-like (A)	-0.00657945	0.0162541	0.0175352
gene-LOC110726414	K12127 pseudo-response regulator 1 | (RefSeq) two-component response regulator-like APRR1 (A)	-0.0075227	0.0158246	0.0175217
gene-LOC110703587	K19040 E3 ubiquitin-protein ligase ATL10/75/76/77/78 [EC:2.3.2.27] | (RefSeq) RING-H2 finger protein ATL74-like (A)	0.00410853	0.0170321	0.0175206
gene-LOC110688037	K00679 phospholipid:diacylglycerol acyltransferase [EC:2.3.1.158] | (RefSeq) hypothetical protein (A)	-0.000759112	0.0175034	0.0175198
gene-LOC110722547	K03549 KUP system potassium uptake protein | (RefSeq) potassium transporter 19-like (A)	-0.000453542	0.01751	0.0175159
gene-LOC110699161	K13429 chitin elicitor receptor kinase 1 | (RefSeq) lysM domain receptor-like kinase 3 (A)	-0.00786922	0.0156367	0.0175052
gene-LOC110682143	K08472 mlo protein | (RefSeq) MLO-like protein 10 isoform X1 (A)	-0.00766085	0.0157371	0.0175027
gene-LOC110693304	K05350 beta-glucosidase [EC:3.2.1.21] | (RefSeq) beta-glucosidase 16-like (A)	-0.00672914	0.0161536	0.0174991
gene-LOC110707332	K01537 P-type Ca2+ transporter type 2C [EC:7.2.2.10] | (RefSeq) LOW QUALITY PROTEIN: putative calcium-transporting ATPase 11, plasma membrane-type (A)	-0.00899114	0.0150092	0.0174962
gene-LOC110739477	--	-0.00983002	-0.0144689	0.0174922
gene-LOC110690953	K06883 uncharacterized protein | (RefSeq) LOW QUALITY PROTEIN: uncharacterized protein LOC104799061 (A)	-0.00760416	0.0157527	0.0174921
gene-LOC110706843	K01054 acylglycerol lipase [EC:3.1.1.23] | (RefSeq) caffeoylshikimate esterase-like (A)	0.00480675	-0.0168151	0.0174887
gene-LOC110707854	K03453 bile acid:Na+ symporter, BASS family | (RefSeq) sodium/pyruvate cotransporter BASS2, chloroplastic-like (A)	-0.00451331	0.0168821	0.017475
gene-LOC110723207	K13449 pathogenesis-related protein 1 | (RefSeq) prp4; pathogenesis related protein 4 precursor (A)	-0.00974065	0.0144997	0.0174677
gene-LOC110717735	K06180 23S rRNA pseudouridine1911/1915/1917 synthase [EC:5.4.99.23] | (RefSeq) pentatricopeptide repeat-containing protein At1g20230 isoform X1 (A)	-0.00199552	0.0173482	0.0174626
gene-LOC110737158	K14509 ethylene receptor [EC:2.7.13.-] | (RefSeq) protein EIN4-like (A)	-0.00758809	0.0157081	0.0174448
gene-LOC110705056	K08150 MFS transporter, SP family, solute carrier family 2 (myo-inositol transporter), member 13 | (RefSeq) inositol transporter 1 (A)	0.00640416	-0.0162228	0.0174411
gene-LOC110698073	--	0.00885348	0.0150209	0.017436
gene-LOC110703798	K15015 solute carrier family 32 (vesicular inhibitory amino acid transporter) | (RefSeq) amino acid transporter AVT1I-like (A)	-0.00377607	0.0170137	0.0174277
gene-LOC110711579	--	-0.00918933	0.0147968	0.017418
gene-LOC110719109	--	-0.00140655	-0.0173569	0.0174138
gene-LOC110725911	K01953 asparagine synthase (glutamine-hydrolysing) [EC:6.3.5.4] | (RefSeq) asparagine synthetase [glutamine-hydrolyzing] 2-like (A)	0.0101067	-0.0141778	0.0174114
gene-LOC110700461	K00130 betaine-aldehyde dehydrogenase [EC:1.2.1.8] | (RefSeq) betaine aldehyde dehydrogenase, chloroplastic (A)	0.00021501	-0.0174031	0.0174044
gene-LOC110713115	--	-0.0044577	-0.016819	0.0173997
gene-LOC110730590	K01805 xylose isomerase [EC:5.3.1.5] | (RefSeq) xylose isomerase (A)	-0.0127764	0.011804	0.0173945
gene-LOC110704808	K12900 FUS-interacting serine-arginine-rich protein 1 | (RefSeq) serine/arginine-rich SC35-like splicing factor SCL33 (A)	0.0141583	-0.0100846	0.0173826
gene-LOC110736557	K00789 S-adenosylmethionine synthetase [EC:2.5.1.6] | (RefSeq) S-adenosylmethionine synthase 4-like (A)	0.00441293	-0.0168127	0.0173822
gene-LOC110689394	K21843 tetratricopeptide repeat protein 7 | (RefSeq) protein NPGR2-like isoform X1 (A)	-0.0047445	0.0167217	0.0173817
gene-LOC110696652	K12373 hexosaminidase [EC:3.2.1.52] | (RefSeq) beta-hexosaminidase 1-like (A)	-0.00432677	0.0168345	0.0173816
gene-LOC110683047	K15015 solute carrier family 32 (vesicular inhibitory amino acid transporter) | (RefSeq) uncharacterized protein LOC107609646 isoform X1 (A)	-0.00423419	0.0168558	0.0173795
gene-LOC110738200	--	-0.0061743	0.0162423	0.0173763
gene-LOC110739982	--	0.0127268	-0.0118261	0.0173732
gene-LOC110712423	K03648 uracil-DNA glycosylase [EC:3.2.2.27] | (RefSeq) uracil-DNA glycosylase (A)	-0.00795683	0.0154387	0.0173685
gene-LOC110710561	K22438 trans-aconitate 3-methyltransferase [EC:2.1.1.145] | (RefSeq) trans-aconitate 3-methyltransferase-like (A)	-0.0104625	0.0138615	0.0173668
gene-LOC110687740	K12160 small ubiquitin-related modifier | (RefSeq) small ubiquitin-related modifier 1-like (A)	-0.00522614	0.0165612	0.0173663
gene-LOC110692698	--	0.00043085	0.017354	0.0173594
gene-LOC110686087	K02553 regulator of ribonuclease activity A | (RefSeq) uncharacterized protein LOC107262668 (A)	-0.00138977	-0.0173035	0.0173592
gene-LOC110708575	K14771 U3 small nucleolar RNA-associated protein 19 | (RefSeq) nucleolar complex protein 4 homolog B-like isoform X1 (A)	0.00943954	0.0145667	0.0173578
gene-LOC110691281	K19090 CRISPR-associated protein Cas5t | (RefSeq) putative pentatricopeptide repeat-containing protein At3g05240 (A)	0.00357135	0.0169843	0.0173557
gene-LOC110682336	K18822 soyasapogenol B glucuronide galactosyltransferase [EC:2.4.1.272] | (RefSeq) soyasapogenol B glucuronide galactosyltransferase (A)	-0.00629194	0.0161746	0.0173553
gene-LOC110697114	--	-0.00810746	0.0153413	0.0173518
gene-LOC110683401	--	-0.00970622	0.0143811	0.0173501
gene-LOC110738136	K13248 pyridoxal phosphate phosphatase PHOSPHO2 [EC:3.1.3.74] | (RefSeq) inorganic pyrophosphatase 2-like (A)	0.00924483	-0.014667	0.0173375
gene-LOC110724638	K22047 mechanosensitive ion channel protein 1/2/3 | (RefSeq) mechanosensitive ion channel protein 2, chloroplastic-like (A)	-0.00941038	0.0145583	0.0173349
gene-LOC110737159	--	-0.00924608	0.0146559	0.0173287
gene-LOC110735742	--	0.0078521	0.0154307	0.0173136
gene-LOC110715012	K01209 alpha-L-arabinofuranosidase [EC:3.2.1.55] | (RefSeq) alpha-L-arabinofuranosidase 1-like (A)	-0.0102928	0.0139213	0.0173131
gene-LOC110729141	--	-0.00587469	0.0162808	0.0173083
gene-LOC110727662	K09510 DnaJ homolog subfamily B member 4 | (RAP-DB) Os05g0562300; Similar to DnaJ-like protein. (A)	0.00955804	-0.0144296	0.0173081
gene-LOC110700607	K10712 cysteamine dioxygenase [EC:1.13.11.19] | (RefSeq) plant cysteine oxidase 3 (A)	-0.00569385	0.0163318	0.0172959
gene-LOC110696830	K10664 E3 ubiquitin-protein ligase ATL6/9/15/31/42/55 [EC:2.3.2.27] | (RefSeq) RING-H2 finger protein ATL57-like (A)	0.00871933	-0.0149349	0.0172939
gene-LOC110695629	K16280 E3 ubiquitin-protein ligase RGLG [EC:2.3.2.27] | (RefSeq) E3 ubiquitin-protein ligase RGLG2-like (A)	0.00171903	0.017208	0.0172937
gene-LOC110718194	--	0.00418108	0.0167797	0.0172928
gene-LOC110717852	--	0.0092032	0.0146383	0.017291
gene-LOC110720065	--	0.00930012	0.0145692	0.0172845
gene-LOC110704160	K14156 choline/ethanolamine kinase [EC:2.7.1.32 2.7.1.82] | (RefSeq) probable choline kinase 1 (A)	0.000981182	0.0172554	0.0172833
gene-LOC110715738	K09705 uncharacterized protein | (RefSeq) uncharacterized protein LOC110715738 (A)	-0.00187338	-0.0171787	0.0172805
gene-LOC110691815	--	-0.0101811	0.0139535	0.0172729
gene-LOC110737435	K08869 aarF domain-containing kinase | (RefSeq) predicted protein (A)	0.00069232	0.0172504	0.0172643
gene-LOC110687250	--	0.00617672	0.0161154	0.0172586
gene-LOC110705093	--	-0.0113565	0.0129933	0.0172568
gene-LOC110711984	--	0.00392891	0.0168028	0.0172561
gene-LOC110727121	--	0.00831511	0.0151199	0.0172555
gene-LOC110701408	K06995 uncharacterized protein | (RefSeq) uncharacterized LOC104602102 (A)	-0.0035034	0.0168904	0.0172499
gene-LOC110711429	K07901 Ras-related protein Rab-8A | (RefSeq) ras-related protein RABE1c (A)	-0.00860715	0.0149452	0.0172465
gene-LOC110723804	--	0.0015423	0.017176	0.0172451
gene-LOC110689255	--	0.000824318	-0.0172236	0.0172433
gene-LOC110701599	K22455 estrogen receptor-binding fragment-associated gene 9 protein | (RefSeq) uncharacterized protein At3g61260-like (A)	-0.00283235	0.0170069	0.0172411
gene-LOC110705051	--	0.0048032	0.0165567	0.0172393
gene-LOC110738616	--	-0.00480086	0.0165565	0.0172385
gene-LOC110714476	--	0.00931923	-0.0145006	0.017237
gene-LOC110729355	--	0.00790688	0.0153161	0.0172367
gene-LOC110712745	K16222 Dof zinc finger protein DOF5.5 | (RefSeq) cyclic dof factor 1-like (A)	0.0107069	-0.0134998	0.0172303
gene-LOC110716850	K14400 pre-mRNA cleavage complex 2 protein Pcf11 | (RefSeq) LOW QUALITY PROTEIN: uncharacterized protein LOC111982967 (A)	-0.0011351	0.0171896	0.0172271
gene-LOC110729653	K22133 oxalate---CoA ligase [EC:6.2.1.8] | (RefSeq) oxalate--CoA ligase-like (A)	0.0060942	-0.0161088	0.017223
gene-LOC110715098	--	0.0118424	0.0124846	0.0172078
gene-LOC110731234	--	0.00901889	0.0146498	0.0172034
gene-LOC110726548	K10418 dynein light chain LC8-type | (RefSeq) uncharacterized protein LOC112029281 (A)	0.00550963	0.0162969	0.017203
gene-LOC110713025	--	0.000282826	0.0171929	0.0171953
gene-LOC110687353	K24081 zinc finger MYND domain-containing protein 15 | (RefSeq) zinc finger MYND domain-containing protein 15 (A)	-0.00584147	0.0161721	0.0171948
gene-LOC110738903	--	-0.00881052	0.0147626	0.0171918
gene-LOC110685360	K14191 18S rRNA (adenine1779-N6/adenine1780-N6)-dimethyltransferase [EC:2.1.1.183] | (RefSeq) ribosomal RNA small subunit methyltransferase (A)	-0.00338306	0.0168509	0.0171872
gene-LOC110690451	--	-0.0101905	0.0138346	0.0171826
gene-LOC110708723	K03111 single-strand DNA-binding protein | (RefSeq) single-stranded DNA-binding protein-like isoform X1 (A)	0.00115025	0.0171426	0.0171811
gene-LOC110700409	K03188 urease accessory protein | (RefSeq) uncharacterized protein LOC108224146 isoform X1 (A)	-0.0123326	0.0119614	0.0171805
gene-LOC110715366	K18740 exonuclease 3'-5' domain-containing protein 1 | (RefSeq) piRNA biogenesis protein EXD1-like isoform X1 (A)	-0.00362498	0.0167904	0.0171773
gene-LOC110718394	K01190 beta-galactosidase [EC:3.2.1.23] | (RefSeq) uncharacterized protein LOC110718394 (A)	-0.0084888	0.0149324	0.0171766
gene-LOC110736637	--	-0.00951235	0.0142998	0.0171747
gene-LOC110706068	K13430 serine/threonine-protein kinase PBS1 [EC:2.7.11.1] | (RefSeq) serine/threonine-protein kinase PBS1 (A)	-0.00863713	0.0148434	0.0171734
gene-LOC110723221	--	0.00868624	0.0148136	0.0171724
gene-LOC110701386	K22262 WD repeat and FYVE domain-containing protein 3 | (RefSeq) protein SPIRRIG (A)	0.000447946	0.0171583	0.0171641
gene-LOC110716857	--	0.0107987	-0.0133398	0.0171628
gene-LOC110700992	K13430 serine/threonine-protein kinase PBS1 [EC:2.7.11.1] | (RefSeq) probable serine/threonine-protein kinase PBL7 (A)	-0.0028496	0.0169232	0.0171614
gene-LOC110732515	K00873 pyruvate kinase [EC:2.7.1.40] | (RefSeq) pyruvate kinase isozyme G, chloroplastic-like (A)	0.0022686	-0.0170047	0.0171553
gene-LOC110707197	K00924 kinase [EC:2.7.1.-] | (RefSeq) receptor protein kinase CLAVATA1-like (A)	-0.00453292	0.016545	0.0171548
gene-LOC110727974	K05941 glutathione gamma-glutamylcysteinyltransferase [EC:2.3.2.15] | (RefSeq) glutathione gamma-glutamylcysteinyltransferase 1-like (A)	0.00560702	0.0162116	0.0171539
gene-LOC110734466	K01968 3-methylcrotonyl-CoA carboxylase alpha subunit [EC:6.4.1.4] | (RefSeq) methylcrotonoyl-CoA carboxylase subunit alpha, mitochondrial (A)	0.0109023	-0.0132414	0.0171521
gene-LOC110688118	K14572 midasin | (RefSeq) midasin-like (A)	-0.00115591	0.0171107	0.0171497
gene-LOC110736222	--	0.00402356	-0.01667	0.0171487
gene-LOC110721595	K02553 regulator of ribonuclease activity A | (RefSeq) uncharacterized protein LOC107262668 (A)	0.00438412	-0.0165785	0.0171483
gene-LOC110731301	K21989 calcium permeable stress-gated cation channel | (RefSeq) calcium permeable stress-gated cation channel 1-like (A)	-0.0109663	0.0131762	0.0171427
gene-LOC110696226	--	0.0134742	-0.0105959	0.0171414
gene-LOC110722289	K01930 folylpolyglutamate synthase [EC:6.3.2.17] | (RefSeq) folylpolyglutamate synthase-like (A)	0.0107462	-0.0133502	0.0171379
gene-LOC110687848	--	-0.00522283	0.0163222	0.0171375
gene-LOC110735671	K00430 peroxidase [EC:1.11.1.7] | (RefSeq) peroxidase 12-like (A)	-0.00497148	0.0163938	0.0171311
gene-LOC110690121	K11968 ariadne-1 [EC:2.3.2.31] | (RefSeq) probable E3 ubiquitin-protein ligase ARI2 isoform X1 (A)	-0.00740331	0.0154456	0.0171282
gene-LOC110686101	--	-0.00329431	0.0167982	0.0171181
gene-LOC110709736	K22422 protein downstream neighbor of Son | (RefSeq) hypothetical protein (A)	0.0141664	-0.00960511	0.0171157
gene-LOC110721278	K23260 scopoletin glucosyltransferase [EC:2.4.1.128] | (RefSeq) scopoletin glucosyltransferase-like (A)	-0.00917992	0.0144421	0.0171127
gene-LOC110721214	K01913 acetate---CoA ligase [EC:6.2.1.1] | (RefSeq) acetate/butyrate--CoA ligase AAE7, peroxisomal isoform X1 (A)	-0.00238443	0.0169457	0.0171127
gene-LOC110691415	K20718 LRR receptor-like serine/threonine-protein kinase ERECTA [EC:2.7.11.1] | (RefSeq) ERb-1; hypothetical protein (A)	-0.00527548	0.0162784	0.0171119
gene-LOC110702765	K00559 sterol 24-C-methyltransferase [EC:2.1.1.41] | (RefSeq) cycloartenol-C-24-methyltransferase-like (A)	0.0084298	0.0148877	0.0171086
gene-LOC110733662	K00131 glyceraldehyde-3-phosphate dehydrogenase (NADP+) [EC:1.2.1.9] | (RefSeq) NADP-dependent glyceraldehyde-3-phosphate dehydrogenase-like (A)	0.00866529	-0.0147516	0.0171084
gene-LOC110689836	--	0.00883228	0.0146504	0.0171068
gene-LOC110703288	K10908 DNA-directed RNA polymerase, mitochondrial [EC:2.7.7.6] | (RefSeq) DNA-directed RNA polymerase 2, chloroplastic/mitochondrial-like (A)	-0.0110596	0.0130483	0.0171048
gene-LOC110694950	K10767 mRNA N6-methyladenine demethylase [EC:1.14.11.53] | (RefSeq) uncharacterized protein LOC110694950 (A)	0.00950277	-0.0142207	0.0171035
gene-LOC110727584	K12823 ATP-dependent RNA helicase DDX5/DBP2 [EC:3.6.4.13] | (RefSeq) DEAD-box ATP-dependent RNA helicase 20-like (A)	-0.00925185	0.0143818	0.0171006
gene-LOC110736781	K09122 uncharacterized protein | (RefSeq) unknown ribonuclease (A)	-0.00520365	0.0162882	0.0170992
gene-LOC110731664	K12133 MYB-related transcription factor LHY | (RefSeq) protein LHY-like (A)	0.00873445	-0.0146999	0.017099
gene-LOC110708765	K09680 type II pantothenate kinase [EC:2.7.1.33] | (RefSeq) pantothenate kinase 1-like (A)	-0.00868602	0.0147271	0.0170978
gene-LOC110697589	K12133 MYB-related transcription factor LHY | (RefSeq) protein CCA1-like isoform X1 (A)	0.00933027	-0.0143209	0.0170921
gene-LOC110724913	--	0.00914395	0.0144361	0.0170884
gene-LOC110724012	K14801 pre-rRNA-processing protein TSR4 | (RefSeq) probable 20S rRNA accumulation protein 4 (A)	-0.00143244	0.0170249	0.017085
gene-LOC110722715	--	-0.00198935	0.0169677	0.0170839
gene-LOC110717458	K01193 beta-fructofuranosidase [EC:3.2.1.26] | (RefSeq) acid beta-fructofuranosidase-like (A)	-0.00204029	0.0169595	0.0170818
gene-LOC110703121	K15919 hydroxypyruvate reductase 2 | (RefSeq) uncharacterized protein LOC111274138 (A)	0.00235819	-0.0169039	0.0170676
gene-LOC110713883	--	0.00897673	0.0145145	0.0170661
gene-LOC110721677	K19040 E3 ubiquitin-protein ligase ATL10/75/76/77/78 [EC:2.3.2.27] | (RefSeq) RING-H2 finger protein ATL74-like (A)	-0.00447135	0.0164682	0.0170644
gene-LOC110735897	--	-0.00610511	0.0159333	0.0170629
gene-LOC110697401	K08867 WNK lysine deficient protein kinase [EC:2.7.11.1] | (RefSeq) serine/threonine-protein kinase WNK8-like (A)	0.00893036	0.0145383	0.017062
gene-LOC110738796	K12135 zinc finger protein CONSTANS | (RefSeq) CO; B-box type zinc finger protein with CCT domain-containing protein (A)	0.0104404	-0.0134889	0.0170574
gene-LOC110725781	K01637 isocitrate lyase [EC:4.1.3.1] | (RefSeq) isocitrate lyase-like (A)	0.0121095	-0.0120116	0.0170563
gene-LOC110727573	--	0.00630951	-0.0158426	0.0170528
gene-LOC110713540	K15397 3-ketoacyl-CoA synthase [EC:2.3.1.199] | (RefSeq) 3-ketoacyl-CoA synthase 11-like (A)	-0.00284171	0.01681	0.0170485
gene-LOC110691223	K15925 alpha-D-xyloside xylohydrolase [EC:3.2.1.177] | (RefSeq) alpha-xylosidase 1-like (A)	-0.000368524	0.0170429	0.0170469
gene-LOC110690614	--	0.00996954	0.0138251	0.0170448
gene-LOC110730706	K03063 26S proteasome regulatory subunit T3 | (RefSeq) 26S protease regulatory subunit 6B homolog (A)	0.00625507	0.0158473	0.0170371
gene-LOC110698459	K13195 cold-inducible RNA-binding protein | (RefSeq) glycine-rich RNA-binding, abscisic acid-inducible protein-like (A)	-0.0104573	0.0134388	0.0170281
gene-LOC110725211	K19996 phosphatidylinositol transfer protein SFH5 | (RefSeq) patellin-3 (A)	0.00102329	0.0169936	0.0170244
gene-LOC110712869	K09531 DnaJ homolog subfamily C member 11 | (RefSeq) chaperone protein dnaJ 13-like isoform X1 (A)	0.000515528	0.017016	0.0170238
gene-LOC110735678	K12619 5'-3' exoribonuclease 2 [EC:3.1.13.-] | (RefSeq) 5'-3' exoribonuclease 3 (A)	-0.00620076	0.0158502	0.01702
gene-LOC110691438	K22565 COMM domain containing 9 | (RefSeq) pentatricopeptide repeat-containing protein At5g50390, chloroplastic (A)	-0.00827705	0.0148674	0.0170162
gene-LOC110703795	--	-0.00171455	0.0169259	0.0170125
gene-LOC110735516	K03500 16S rRNA (cytosine967-C5)-methyltransferase [EC:2.1.1.176] | (RefSeq) uncharacterized protein LOC110735516 (A)	0.000782904	0.0169944	0.0170124
gene-LOC110688533	K00499 choline monooxygenase [EC:1.14.15.7] | (RefSeq) choline monooxygenase, chloroplastic-like (A)	-0.00359768	-0.016615	0.017
gene-LOC110735654	K14156 choline/ethanolamine kinase [EC:2.7.1.32 2.7.1.82] | (RefSeq) probable choline kinase 1 (A)	0.00193256	0.0168829	0.0169931
gene-LOC110698085	K17193 anthocyanidin 3-O-glucoside 2'''-O-xylosyltransferase [EC:2.4.2.51] | (RefSeq) anthocyanidin 3-O-glucoside 2'''-O-xylosyltransferase-like (A)	0.00238502	-0.0168215	0.0169897
gene-LOC110722118	K15271 ATP-dependent DNA helicase HFM1/MER3 [EC:3.6.4.12] | (RefSeq) DExH-box ATP-dependent RNA helicase DExH17 (A)	0.0014464	0.0169259	0.0169876
gene-TRNAC-GCA-26	--	0.00984371	-0.0138427	0.0169858
gene-LOC110714204	--	-0.00554829	0.0160514	0.0169833
gene-LOC110691527	K18134 protein O-GlcNAc transferase [EC:2.4.1.255] | (RefSeq) uncharacterized protein LOC107919046 (A)	0.00316941	0.0166849	0.0169832
gene-LOC110711125	K21596 calmodulin-binding transcription activator | (RefSeq) calmodulin-binding transcription activator 4-like isoform X1 (A)	-0.0110408	0.0129019	0.0169811
gene-LOC110713708	--	0.00489171	0.0162547	0.0169748
gene-LOC110733543	K00430 peroxidase [EC:1.11.1.7] | (RefSeq) peroxidase P7-like (A)	-0.000161173	0.0169729	0.0169737
gene-LOC110734295	K01303 acylaminoacyl-peptidase [EC:3.4.19.1] | (RefSeq) acylamino-acid-releasing enzyme-like (A)	-0.0107413	0.0131269	0.0169615
gene-LOC110700602	K00026 malate dehydrogenase [EC:1.1.1.37] | (RefSeq) malate dehydrogenase, chloroplastic-like (A)	-0.000800275	-0.016941	0.0169599
gene-LOC110689158	K01183 chitinase [EC:3.2.1.14] | (RefSeq) endochitinase A (A)	0.0118289	0.0121534	0.0169596
gene-LOC110720301	--	-0.00986804	0.0137913	0.0169581
gene-LOC110702120	K00784 ribonuclease Z [EC:3.1.26.11] | (RefSeq) tRNase Z TRZ1 isoform X1 (A)	-0.00245478	0.0167795	0.0169581
gene-LOC110710124	K00499 choline monooxygenase [EC:1.14.15.7] | (RefSeq) choline monooxygenase, chloroplastic (A)	0.000231878	-0.0169556	0.0169571
gene-LOC110690571	K09874 aquaporin NIP | (RefSeq) probable aquaporin NIP5-1 (A)	-0.00643958	0.0156784	0.0169493
gene-LOC110729586	K11883 RNA-binding protein NOB1 | (RefSeq) RNA-binding protein NOB1 isoform X1 (A)	0.00462082	0.016306	0.0169481
gene-LOC110707162	K03217 YidC/Oxa1 family membrane protein insertase | (RefSeq) ALBINO3-like protein 1, chloroplastic (A)	-0.00799422	0.0149239	0.0169302
gene-LOC110709113	K16818 phospholipase A1 [EC:3.1.1.32] | (RefSeq) phospholipase A(1) DAD1, chloroplastic-like (A)	-0.00891537	0.0143854	0.016924
gene-LOC110722840	K04123 ent-kaurenoic acid hydroxylase [EC:1.14.13.79] | (RefSeq) ent-kaurenoic acid oxidase-like isoform X1 (A)	-0.000795439	0.0169032	0.0169219
gene-LOC110714896	K08235 xyloglucan:xyloglucosyl transferase [EC:2.4.1.207] | (RefSeq) xyloglucan endotransglucosylase/hydrolase 2-like (A)	-0.00195651	0.016806	0.0169195
gene-LOC110699301	--	-0.00874908	-0.0144803	0.0169182
gene-LOC110716334	K00784 ribonuclease Z [EC:3.1.26.11] | (RefSeq) tRNase Z TRZ1 isoform X1 (A)	-0.00401244	0.0164246	0.0169076
gene-LOC110714019	--	-0.00761549	0.0150907	0.0169034
gene-LOC110710678	K03671 thioredoxin 1 | (RefSeq) thioredoxin Y2, chloroplastic-like (A)	-0.00951611	0.0139683	0.0169017
gene-LOC110732448	K14648 poly(U)-specific endoribonuclease [EC:3.1.-.-] | (RefSeq) LOW QUALITY PROTEIN: poly(U)-specific endoribonuclease-B-like (A)	0.00629396	0.0156849	0.0169005
gene-LOC110708551	K15283 solute carrier family 35, member E1 | (RefSeq) phosphoenolpyruvate/phosphate translocator 2, chloroplastic-like (A)	0.0040369	-0.0164105	0.0168997
gene-LOC110730904	--	0.00700551	-0.0153786	0.0168991
gene-LOC110695136	--	0.00339801	0.0165534	0.0168986
gene-LOC110725140	K09775 uncharacterized protein | (RefSeq) hypothetical protein (A)	0.0131401	-0.0106225	0.0168967
gene-LOC110739248	--	0.0109117	0.0128987	0.016895
gene-LOC110739681	K17279 receptor expression-enhancing protein 5/6 | (RefSeq) HVA22-like protein e isoform X1 (A)	-0.00464134	-0.0162394	0.0168896
gene-LOC110690505	K22262 WD repeat and FYVE domain-containing protein 3 | (RefSeq) protein SPIRRIG (A)	-0.0037479	0.0164668	0.0168879
gene-LOC110732988	K18819 inositol 3-alpha-galactosyltransferase [EC:2.4.1.123] | (RefSeq) galactinol synthase 1-like (A)	0.0130531	-0.010712	0.0168858
gene-LOC110713669	K14300 nuclear pore complex protein Nup133 | (RefSeq) nuclear pore complex protein NUP133 (A)	0.00959938	0.0138874	0.0168822
gene-LOC110709007	--	0.00616388	0.0157152	0.0168808
gene-LOC110722068	K01213 galacturan 1,4-alpha-galacturonidase [EC:3.2.1.67] | (RefSeq) polygalacturonase At1g48100-like (A)	0.0127271	-0.011082	0.0168757
gene-LOC110691978	K02934 large subunit ribosomal protein L6e | (RefSeq) 60S ribosomal protein L6-like isoform X1 (A)	0.0042096	-0.016342	0.0168755
gene-LOC110698462	K13195 cold-inducible RNA-binding protein | (RefSeq) glycine-rich RNA-binding protein 7 (A)	-0.00653611	0.0155498	0.0168676
gene-LOC110684642	K00487 trans-cinnamate 4-monooxygenase [EC:1.14.14.91] | (RefSeq) trans-cinnamate 4-monooxygenase (A)	0.00917863	-0.0141451	0.0168621
gene-LOC110684152	K20715 phototropin [EC:2.7.11.1] | (RefSeq) phototropin-1-like isoform X1 (A)	-0.0104733	0.0132145	0.0168616
gene-LOC110684200	K10268 F-box and leucine-rich repeat protein 2/20 | (RefSeq) F-box/LRR-repeat protein 3-like (A)	-0.00207043	0.0167314	0.016859
gene-LOC110719280	K07447 putative holliday junction resolvase [EC:3.1.-.-] | (RefSeq) uncharacterized protein LOC110719280 (A)	0.000751041	0.0168413	0.016858
gene-LOC110737567	K03654 ATP-dependent DNA helicase RecQ [EC:3.6.4.12] | (RefSeq) uncharacterized protein LOC110734037 isoform X1 (A)	0.00990176	0.0136407	0.0168557
gene-LOC110687362	K03327 multidrug resistance protein, MATE family | (RefSeq) protein DETOXIFICATION 40-like isoform X1 (A)	0.0116097	-0.0122122	0.01685
gene-LOC110706914	K10683 BRCA1-associated RING domain protein 1 | (RefSeq) hypothetical protein (A)	0.00142888	0.0167879	0.0168486
gene-LOC110705715	K16297 serine carboxypeptidase-like clade II [EC:3.4.16.-] | (RefSeq) serine carboxypeptidase-like 40 (A)	-0.00369277	0.0164364	0.0168462
gene-LOC110700453	--	-0.00354882	-0.0164635	0.0168416
gene-LOC110718241	--	0.00724491	0.015203	0.0168411
gene-LOC110727626	K09060 plant G-box-binding factor | (RefSeq) bZIP transcription factor 16-like (A)	0.000824587	-0.0168166	0.0168368
gene-LOC110698042	K03452 magnesium/proton exchanger | (RefSeq) uncharacterized LOC18613571 (A)	-0.00655346	0.0155062	0.0168342
gene-LOC110737103	K01456 peptide-N4-(N-acetyl-beta-glucosaminyl)asparagine amidase [EC:3.5.1.52] | (RefSeq) peptide-N(4)-(N-acetyl-beta- glucosaminyl)asparagine amidase isoform X1 (A)	-0.0107536	0.0129514	0.0168339
gene-LOC110725327	K01942 biotin---protein ligase [EC:6.3.4.9 6.3.4.10 6.3.4.11 6.3.4.15] | (RefSeq) biotin--protein ligase 2-like (A)	-0.00958271	0.0138379	0.016832
gene-LOC110734025	K12235 serine racemase [EC:5.1.1.18] | (RefSeq) uncharacterized protein LOC110763563 isoform X1 (A)	-0.00174755	-0.016739	0.01683
gene-LOC110722299	K10615 E3 ubiquitin-protein ligase HERC4 [EC:2.3.2.26] | (RefSeq) E3 ubiquitin-protein ligase (A)	0.0113811	-0.012391	0.0168246
gene-LOC110688317	K08247 methionine S-methyltransferase [EC:2.1.1.12] | (RefSeq) methionine S-methyltransferase (A)	-0.0109103	0.0128052	0.0168228
gene-LOC110692758	--	-0.0047909	0.0161248	0.0168214
gene-LOC110709587	--	-0.00930938	0.0140046	0.0168164
gene-LOC110713114	--	-0.00750985	-0.0150459	0.0168159
gene-LOC110737928	K00965 UDPglucose--hexose-1-phosphate uridylyltransferase [EC:2.7.7.12] | (RefSeq) ADP-glucose phosphorylase-like (A)	0.00605372	0.0156863	0.0168139
gene-LOC110720159	K15203 general transcription factor 3C polypeptide 6 | (RefSeq) general transcription factor 3C polypeptide 6-like (A)	0.000873398	0.0167877	0.0168104
gene-LOC110699222	K09377 cysteine and glycine-rich protein | (RefSeq) LIM domain-containing protein WLIM2b-like (A)	-0.00648704	0.0155038	0.0168063
gene-LOC110708425	--	0.00201407	0.016685	0.0168061
gene-LOC110692809	K15083 DNA repair protein RAD16 | (RefSeq) DNA repair protein RAD16-like (A)	0.00391709	0.0163387	0.0168017
gene-LOC110684566	K07901 Ras-related protein Rab-8A | (RefSeq) ras-related protein RABE1c (A)	-0.00539156	0.0159099	0.0167986
gene-LOC110712657	--	0.0105755	0.0130511	0.016798
gene-LOC110691336	K01188 beta-glucosidase [EC:3.2.1.21] | (RefSeq) beta-glucosidase 12-like (A)	-0.00720701	0.0151691	0.0167942
gene-LOC110716794	K05391 cyclic nucleotide gated channel, plant | (RefSeq) probable cyclic nucleotide-gated ion channel 14 isoform X1 (A)	-0.0127513	0.0109267	0.0167926
gene-LOC110720713	K01611 S-adenosylmethionine decarboxylase [EC:4.1.1.50] | (RefSeq) S-adenosylmethionine decarboxylase proenzyme (A)	0.012317	-0.0114113	0.0167907
gene-LOC110717851	--	0.00861549	0.0144115	0.0167904
gene-LOC110681838	--	-0.00787923	0.0148261	0.0167897
gene-LOC110727498	K10268 F-box and leucine-rich repeat protein 2/20 | (RefSeq) F-box/LRR-repeat protein 12-like (A)	-0.00945433	-0.0138741	0.0167891
gene-LOC110688029	--	0.00484155	0.0160752	0.0167885
gene-LOC110684432	K00679 phospholipid:diacylglycerol acyltransferase [EC:2.3.1.158] | (RefSeq) hypothetical protein (A)	-0.0094595	0.0138654	0.0167849
gene-LOC110688372	K01176 alpha-amylase [EC:3.2.1.1] | (RefSeq) lectin-domain containing receptor kinase VI.3-like (A)	0.000325678	-0.0167809	0.016784
gene-LOC110729624	--	-0.0121446	0.0115848	0.0167839
gene-LOC110733522	--	-0.0110998	0.0125892	0.0167837
gene-LOC110733590	--	-0.00538649	0.0158956	0.0167835
gene-LOC110699830	K17086 transmembrane 9 superfamily member 2/4 | (RefSeq) uncharacterized LOC101300290 (A)	0.0097003	0.0136943	0.0167818
gene-LOC110731985	K02335 DNA polymerase I [EC:2.7.7.7] | (RefSeq) DNA polymerase I A, chloroplastic/mitochondrial-like (A)	0.00230068	0.0166228	0.0167813
gene-LOC110721089	K13449 pathogenesis-related protein 1 | (RefSeq) pathogenesis-related protein PRB1-3-like (A)	0.0110381	-0.0126343	0.016777
gene-LOC110688327	--	-0.0109037	0.0127494	0.0167761
gene-LOC110682773	K03233 elongation factor 1-gamma | (RefSeq) elongation factor 1-gamma 1-like (A)	0.000310009	0.0167679	0.0167707
gene-LOC110690974	K08139 MFS transporter, SP family, sugar:H+ symporter | (RefSeq) sugar transport protein 1 (A)	-0.0101792	0.0133231	0.0167667
gene-LOC110691411	K01188 beta-glucosidase [EC:3.2.1.21] | (RefSeq) beta-glucosidase 12-like (A)	-0.0077265	0.0148774	0.0167641
gene-LOC110699964	--	0.00783095	0.01482	0.0167617
gene-LOC110687864	K01076 abhydrolase domain-containing protein 17 [EC:3.1.2.22] | (RefSeq) protein ABHD17C-like (A)	-0.00207937	-0.0166217	0.0167512
gene-LOC110715582	--	0.00811546	0.0146532	0.0167504
gene-LOC110693495	--	0.0096251	0.0137054	0.0167476
gene-LOC110686663	K00128 aldehyde dehydrogenase (NAD+) [EC:1.2.1.3] | (RefSeq) aldehyde dehydrogenase family 2 member B4, mitochondrial-like isoform X1 (A)	-0.0029797	0.016478	0.0167453
gene-LOC110716003	K13354 solute carrier family 25 (peroxisomal adenine nucleotide transporter), member 17 | (RefSeq) mitochondrial carrier (A)	-0.0108026	0.0127872	0.0167395
gene-LOC110711029	K14209 solute carrier family 36 (proton-coupled amino acid transporter) | (RefSeq) amino acid transporter ANT1 (A)	0.0111022	0.0125178	0.0167318
gene-LOC110685067	--	-0.00557407	0.0157697	0.0167258
gene-LOC110730207	K00873 pyruvate kinase [EC:2.7.1.40] | (RefSeq) pyruvate kinase isozyme G, chloroplastic-like (A)	0.0112938	-0.0123285	0.0167195
gene-LOC110717819	K11649 SWI/SNF related-matrix-associated actin-dependent regulator of chromatin subfamily C | (RefSeq) F-box and associated interaction domain protein (A)	-0.00799207	0.0146837	0.0167178
gene-LOC110712853	--	0.00851529	0.0143861	0.0167174
gene-LOC110728017	--	-0.0114488	0.0121799	0.016716
gene-LOC110694026	--	-0.00247939	0.0165262	0.0167111
gene-LOC110725539	K14975 codeine 3-O-demethylase [EC:1.14.11.32] | (RefSeq) codeine O-demethylase (A)	0.0110037	-0.0125768	0.016711
gene-LOC110731983	--	0.00612544	0.0155475	0.0167106
gene-LOC110699304	K19038 E3 ubiquitin-protein ligase ATL41 [EC:2.3.2.27] | (RefSeq) RING-H2 finger protein ATL40-like (A)	-0.00915299	0.0139797	0.0167096
gene-LOC110720335	K13205 A1 cistron-splicing factor AAR2 | (RefSeq) protein AAR2 homolog (A)	-0.0114358	0.012178	0.0167058
gene-LOC110698247	--	-0.000427121	-0.0166979	0.0167034
gene-LOC110693357	K17964 leucine-rich PPR motif-containing protein, mitochondrial | (RefSeq) pentatricopeptide repeat-containing protein At5g61990, mitochondrial (A)	0.0049864	0.0159404	0.0167021
gene-LOC110709112	--	0.00154934	0.0166291	0.0167011
gene-LOC110685102	K08139 MFS transporter, SP family, sugar:H+ symporter | (RefSeq) sugar transport protein 1 (A)	-0.0107839	0.012752	0.0167004
gene-LOC110720326	K15078 structure-specific endonuclease subunit SLX1 [EC:3.6.1.-] | (RefSeq) putative disease resistance protein RGA3 (A)	-0.00993068	0.0134226	0.0166969
gene-LOC110704028	K23872 putative homogalacturonan methyltransferase [EC:2.1.1.-] | (RefSeq) hypothetical protein (A)	-0.00399531	0.0162095	0.0166946
gene-LOC110739222	K12848 U4/U6.U5 tri-snRNP component SNU23 | (RefSeq) zinc finger matrin-type protein 2 isoform X1 (A)	-0.00912571	0.0139775	0.0166928
gene-LOC110689376	K01051 pectinesterase [EC:3.1.1.11] | (RefSeq) pectinesterase-like (A)	-0.00461838	0.01604	0.0166916
gene-LOC110697966	--	-0.00272444	0.0164656	0.0166894
gene-LOC110721037	--	0.012693	0.010831	0.016686
gene-LOC110704409	K11699 RNA-dependent RNA polymerase [EC:2.7.7.48] | (RefSeq) RNA-dependent RNA polymerase 1-like (A)	-0.00145144	0.0166218	0.0166851
gene-LOC110740036	K01580 glutamate decarboxylase [EC:4.1.1.15] | (RefSeq) glutamate decarboxylase-like (A)	-0.0116669	0.0119225	0.0166812
gene-LOC110705090	K13195 cold-inducible RNA-binding protein | (RefSeq) glycine-rich RNA-binding protein 7 (A)	-0.00675599	0.0152502	0.0166797
gene-LOC110728646	K06268 serine/threonine-protein phosphatase 2B regulatory subunit | (RefSeq) calcineurin B-like protein 4 (A)	-0.00545438	0.0157619	0.016679
gene-LOC110699691	K09646 serine carboxypeptidase 1 [EC:3.4.16.-] | (RefSeq) serine carboxypeptidase-like 51 (A)	-0.0116261	0.0119575	0.0166777
gene-LOC110703470	K08150 MFS transporter, SP family, solute carrier family 2 (myo-inositol transporter), member 13 | (Kazusa) Lj4g3v0119930.1; - (A)	-0.00936516	0.0137993	0.0166772
gene-LOC110691394	K12173 BRCA1-A complex subunit BRE | (RefSeq) BRCA1-A complex subunit BRE-like (A)	0.0105389	-0.0129194	0.0166727
gene-LOC110729958	K20606 mitogen-activated protein kinase kinase kinase ANP1 [EC:2.7.11.25] | (RefSeq) receptor-like serine/threonine-protein kinase SD1-7 isoform X1 (A)	-0.00923636	0.0138678	0.0166621
gene-LOC110733934	K15100 solute carrier family 25 (mitochondrial citrate transporter), member 1 | (RefSeq) mitochondrial succinate-fumarate transporter 1-like (A)	0.0142253	-0.00867406	0.0166613
gene-LOC110714905	--	0.0143481	0.00846101	0.0166571
gene-LOC110705912	K00131 glyceraldehyde-3-phosphate dehydrogenase (NADP+) [EC:1.2.1.9] | (RefSeq) NADP-dependent glyceraldehyde-3-phosphate dehydrogenase (A)	0.0123012	-0.0112196	0.0166493
gene-LOC110733516	--	-0.00992463	0.0133643	0.0166464
gene-LOC110725763	K23541 Ca2+/H+ antiporter, TMEM165/GDT1 family | (RefSeq) putative pentatricopeptide repeat-containing protein At1g68930 (A)	0.000787749	0.0166224	0.0166411
gene-LOC110701232	K12447 UDP-sugar pyrophosphorylase [EC:2.7.7.64] | (RefSeq) uncharacterized protein LOC104808371 (A)	0.00993	0.0133511	0.016639
gene-LOC110689216	K03652 DNA-3-methyladenine glycosylase [EC:3.2.2.21] | (RefSeq) DNA-3-methyladenine glycosylase-like (A)	-0.00423968	0.0160887	0.016638
gene-LOC110693914	K01183 chitinase [EC:3.2.1.14] | (RefSeq) acidic endochitinase-like (A)	0.00278146	0.0164016	0.0166358
gene-LOC110712406	K03327 multidrug resistance protein, MATE family | (RefSeq) protein DETOXIFICATION 29-like (A)	0.00441674	0.0160306	0.016628
gene-LOC110701128	--	-0.00118612	0.01658	0.0166223
gene-LOC110737156	K00599 methyltransferase-like protein 6 [EC:2.1.1.-] | (RefSeq) methyltransferase-like protein 6 isoform X1 (A)	0.00578184	0.0155831	0.0166212
gene-LOC110713238	--	0.00834002	0.0143745	0.0166187
gene-LOC110726941	--	0.00132296	0.0165658	0.0166185
gene-LOC110688505	K20715 phototropin [EC:2.7.11.1] | (RefSeq) phototropin-1-like (A)	-0.0124411	0.0110125	0.016615
gene-LOC110691656	K10878 meiotic recombination protein SPO11 | (RefSeq) meiotic recombination protein SPO11-2-like (A)	-0.00549081	0.0156801	0.0166136
gene-LOC110688216	K00326 cytochrome-b5 reductase [EC:1.6.2.2] | (RefSeq) NADH--cytochrome b5 reductase 1-like (A)	0.00644812	-0.0153063	0.0166091
gene-LOC110683862	--	-0.00151284	0.0165393	0.0166084
gene-LOC110712238	--	-0.0123603	0.0110838	0.016602
gene-LOC110708755	--	-0.000759787	0.0165809	0.0165983
gene-LOC110685113	K02218 casein kinase 1 [EC:2.7.11.1] | (RefSeq) uncharacterized protein LOC8069780 (A)	0.0109043	0.0125122	0.016597
gene-LOC110715397	K20606 mitogen-activated protein kinase kinase kinase ANP1 [EC:2.7.11.25] | (RefSeq) receptor-like serine/threonine-protein kinase SD1-7 isoform X1 (A)	-0.00892331	0.0139935	0.0165965
gene-LOC110715383	K00844 hexokinase [EC:2.7.1.1] | (RefSeq) hexokinase-1-like (A)	-0.00910148	0.013874	0.0165929
gene-LOC110689632	K00876 uridine kinase [EC:2.7.1.48] | (RefSeq) transmembrane protein, putative (A)	0.000317229	0.0165898	0.0165928
gene-LOC110727819	--	-0.00799066	0.014542	0.0165928
gene-LOC110697179	K23877 xyloglucan O-acetyltransferase | (RefSeq) protein ALTERED XYLOGLUCAN 4-like (A)	-0.00828558	0.0143755	0.0165923
gene-LOC110719785	K10523 speckle-type POZ protein | (RefSeq) BTB/POZ and MATH domain-containing protein 2 (A)	-0.00941132	0.013664	0.0165915
gene-LOC110702887	K10406 kinesin family member C2/C3 | (RefSeq) kinesin-like protein KIN-14P (A)	0.00701741	0.0150328	0.01659
gene-LOC110691437	K01184 polygalacturonase [EC:3.2.1.15] | (RefSeq) LOC109764960; polygalacturonase ADPG1-like (A)	-0.0130645	0.0102221	0.0165883
gene-LOC110729974	K09287 RAV-like factor | (RefSeq) AP2/ERF and B3 domain-containing transcription repressor RAV2-like (A)	-0.00929848	0.0137326	0.0165845
gene-LOC110695735	K01166 ribonuclease T2 [EC:3.1.27.1] | (RefSeq) uncharacterized protein LOC111302682 (A)	0.00982013	-0.0133641	0.0165842
gene-LOC110695216	K14525 ribonucleases P/MRP protein subunit RPP25 [EC:3.1.26.5] | (RefSeq) ribonuclease P protein subunit p25-like protein (A)	-0.010634	0.0127214	0.0165806
gene-LOC110724255	K10260 F-box and WD-40 domain protein 7 | (RefSeq) hypothetical protein (A)	0.010246	0.0130301	0.016576
gene-LOC110713794	K03327 multidrug resistance protein, MATE family | (RefSeq) protein DETOXIFICATION 12-like (A)	-0.00906658	0.0138743	0.0165741
gene-LOC110726714	K13459 disease resistance protein RPS2 | (RefSeq) disease resistance protein RPS2-like (A)	-0.0066089	0.0151966	0.0165715
gene-LOC110699728	K19892 glucan endo-1,3-beta-glucosidase 4 [EC:3.2.1.39] | (RefSeq) LOC109756982; glucan endo-1,3-beta-glucosidase 4-like isoform X1 (A)	0.00282597	0.0163281	0.0165709
gene-LOC110716919	K15285 solute carrier family 35, member E3 | (RefSeq) uncharacterized protein LOC107963028 (A)	0.011866	-0.0115657	0.0165701
gene-LOC110697689	--	0.0132021	0.0100123	0.0165693
gene-LOC110739470	K09250 cellular nucleic acid-binding protein | (RefSeq) cold shock domain-containing protein 3-like (A)	-0.00969969	0.0134333	0.0165691
gene-LOC110684357	K15121 solute carrier family 25, member 44 | (RefSeq) solute carrier family 25 member 44-like (A)	0.00552744	0.0156196	0.0165688
gene-LOC110708737	K09510 DnaJ homolog subfamily B member 4 | (RefSeq) dnaJ homolog subfamily B member 4-like (A)	-0.00988642	0.0132953	0.0165682
gene-LOC110733306	K14857 AdoMet-dependent rRNA methyltransferase SPB1 [EC:2.1.1.-] | (RefSeq) adoMet-dependent rRNA methyltransferase spb1 (A)	-0.0047206	0.0158759	0.0165629
gene-LOC110686859	--	0.00119997	-0.016518	0.0165616
gene-LOC110693637	--	-0.00853259	-0.0141919	0.0165594
gene-LOC110731078	K23289 EARP and GARP complex-interacting protein 1 | (RefSeq) WD repeat-containing protein DWA2-like (A)	-0.000256076	-0.0165548	0.0165568
gene-LOC110739176	K12133 MYB-related transcription factor LHY | (RefSeq) protein CCA1-like isoform X1 (A)	0.00835895	-0.0142918	0.0165568
gene-LOC110698538	--	0.0119499	-0.0114433	0.0165453
gene-LOC110730304	K11420 euchromatic histone-lysine N-methyltransferase [EC:2.1.1.43] | (RefSeq) histone-lysine N-methyltransferase, H3 lysine-9 specific SUVH6-like (A)	-0.00169585	0.0164555	0.0165426
gene-LOC110733336	--	0.0121711	-0.0111933	0.0165356
gene-LOC110683457	K19517 1D-myo-inositol 3-kinase [EC:2.7.1.64] | (RefSeq) inositol 3-kinase-like (A)	-0.0116181	0.0117657	0.0165352
gene-LOC110725959	K08139 MFS transporter, SP family, sugar:H+ symporter | (RefSeq) hypothetical protein (A)	-0.012463	0.0108666	0.0165351
gene-LOC110736183	K22262 WD repeat and FYVE domain-containing protein 3 | (RefSeq) protein SPIRRIG (A)	-0.0033345	0.0161934	0.0165331
gene-LOC110722847	--	-0.00463592	0.0158687	0.016532
gene-LOC110691264	K09287 RAV-like factor | (RefSeq) AP2/ERF and B3 domain-containing transcription factor RAV1-like (A)	-0.00590123	0.0154315	0.0165214
gene-LOC110721817	K06180 23S rRNA pseudouridine1911/1915/1917 synthase [EC:5.4.99.23] | (RefSeq) pentatricopeptide repeat-containing protein At1g20230 isoform X1 (A)	0.00113241	0.0164817	0.0165206
gene-LOC110736236	K09753 cinnamoyl-CoA reductase [EC:1.2.1.44] | (RefSeq) cinnamoyl-CoA reductase 1-like (A)	-0.000255427	-0.0165165	0.0165184
gene-LOC110700995	K01640 hydroxymethylglutaryl-CoA lyase [EC:4.1.3.4] | (RefSeq) hydroxymethylglutaryl-CoA lyase, mitochondrial-like (A)	0.00504204	-0.0157236	0.0165122
gene-LOC110703812	K01940 argininosuccinate synthase [EC:6.3.4.5] | (RefSeq) argininosuccinate synthase, chloroplastic-like (A)	0.000191587	0.016508	0.0165091
gene-LOC110726840	K10523 speckle-type POZ protein | (RefSeq) hypothetical protein (A)	-0.0102803	0.0129176	0.016509
gene-LOC110689005	K22128 piezo-type mechanosensitive ion channel component 1/2 | (RefSeq) hypothetical protein (A)	-0.000778844	0.0164898	0.0165082
gene-LOC110693691	--	-0.0120496	0.0112836	0.016508
gene-LOC110723642	--	0.0113336	-0.0119989	0.0165053
gene-LOC110688328	K06636 structural maintenance of chromosome 1 | (RefSeq) structural maintenance of chromosomes protein 2-2-like (A)	-0.000285917	0.0165008	0.0165032
gene-LOC110708798	K15363 fanconi-associated nuclease 1 [EC:3.1.21.- 3.1.4.1] | (RefSeq) fanconi-associated nuclease 1 homolog (A)	-0.0125103	0.0107609	0.0165017
gene-LOC110736272	K03860 phosphatidylinositol glycan, class Q | (RefSeq) N-acetylglucosaminyl-phosphatidylinositol biosynthetic protein gpi1-like (A)	-0.00648085	0.0151753	0.0165013
gene-LOC110734008	K00384 thioredoxin reductase (NADPH) [EC:1.8.1.9] | (RefSeq) thioredoxin reductase 1-like (A)	-0.00626305	0.0152616	0.0164967
gene-LOC110737049	K12951 cobalt/nickel-transporting P-type ATPase D [EC:3.6.3.-] | (RefSeq) hypothetical protein (A)	0.0111206	-0.0121687	0.0164847
gene-LOC110735020	K10527 enoyl-CoA hydratase/3-hydroxyacyl-CoA dehydrogenase [EC:4.2.1.17 1.1.1.35 1.1.1.211] | (RefSeq) peroxisomal fatty acid beta-oxidation multifunctional protein MFP2-like (A)	-0.00459969	0.015829	0.0164837
gene-LOC110713643	K18878 BHLH transcription factor Upa20 | (RefSeq) Upa20; transcription factor bHLH137-like (A)	0.00646543	0.0151624	0.0164833
gene-LOC110720846	--	0.0127473	-0.0104494	0.0164828
gene-LOC110726933	K08235 xyloglucan:xyloglucosyl transferase [EC:2.4.1.207] | (RefSeq) LOW QUALITY PROTEIN: probable xyloglucan endotransglucosylase/hydrolase protein B (A)	0.00915853	0.0136993	0.0164787
gene-LOC110705919	--	0.0118663	0.011434	0.0164787
gene-LOC110715578	K14376 poly(A) polymerase [EC:2.7.7.19] | (RefSeq) nuclear poly(A) polymerase 4-like (A)	-0.010235	0.0129105	0.0164754
gene-LOC110708542	K08235 xyloglucan:xyloglucosyl transferase [EC:2.4.1.207] | (RefSeq) probable xyloglucan endotransglucosylase/hydrolase protein 28 (A)	-0.00230257	0.016313	0.0164747
gene-LOC110702465	K01184 polygalacturonase [EC:3.2.1.15] | (RefSeq) polygalacturonase QRT2-like (A)	-0.00271786	0.0162474	0.0164731
gene-LOC110688806	K00549 5-methyltetrahydropteroyltriglutamate--homocysteine methyltransferase [EC:2.1.1.14] | (RefSeq) 5-methyltetrahydropteroyltriglutamate-- homocysteine methyltransferase-like (A)	0.00531107	-0.0155913	0.016471
gene-LOC110720925	K00700 1,4-alpha-glucan branching enzyme [EC:2.4.1.18] | (RefSeq) 1,4-alpha-glucan-branching enzyme 3, chloroplastic/amyloplastic-like (A)	-0.00302441	0.0161903	0.0164704
gene-LOC110699236	K19747 BAHD acyltransferase [EC:2.3.1.-] | (RefSeq) BAHD acyltransferase DCR (A)	-0.00766078	0.0145792	0.0164693
gene-LOC110719570	--	-0.0117643	0.0115237	0.016468
gene-LOC110690912	K01183 chitinase [EC:3.2.1.14] | (RefSeq) acidic mammalian chitinase-like (A)	-0.0105678	0.0126262	0.016465
gene-LOC110735856	K12309 beta-galactosidase [EC:3.2.1.23] | (RefSeq) BGAL2; beta-galactosidase 2 (A)	-0.00068936	0.0164503	0.0164647
gene-LOC110729741	K01835 phosphoglucomutase [EC:5.4.2.2] | (RefSeq) phosphoglucomutase, chloroplastic-like (A)	-0.0127769	0.0103843	0.0164646
gene-LOC110699158	--	-0.00328778	0.0161271	0.0164588
gene-LOC110705749	K10908 DNA-directed RNA polymerase, mitochondrial [EC:2.7.7.6] | (RefSeq) DNA-directed RNA polymerase 2, chloroplastic/mitochondrial-like (A)	-0.00940025	0.0135096	0.0164583
gene-LOC110694424	K01840 phosphomannomutase [EC:5.4.2.8] | (RefSeq) uncharacterized protein LOC107434468 (A)	-0.00945242	0.0134695	0.0164553
gene-LOC110696242	--	0.0134916	0.00941114	0.0164497
gene-LOC110729742	--	-0.00171446	0.0163599	0.0164495
gene-LOC110701499	--	0.00786527	-0.0144407	0.0164437
gene-LOC110718642	K03686 molecular chaperone DnaJ | (RefSeq) chaperone protein dnaJ A7A, chloroplastic-like (A)	-0.00569474	0.0154259	0.0164435
gene-LOC110735162	K20781 peptidyl serine alpha-galactosyltransferase [EC:2.4.1.-] | (RefSeq) peptidyl serine alpha-galactosyltransferase-like (A)	-0.0106652	0.0125149	0.0164429
gene-LOC110693699	K07904 Ras-related protein Rab-11A | (RefSeq) ras-related protein RABA1f-like (A)	0.0047484	0.0157373	0.016438
gene-LOC110730510	--	-0.00884937	0.0138484	0.0164344
gene-LOC110724302	K13151 snurportin-1 | (RefSeq) snurportin-1-like isoform X1 (A)	0.00702425	0.0148562	0.0164331
gene-LOC110732449	K19525 vacuolar protein sorting-associated protein 13A/C | (RefSeq) uncharacterized protein LOC110732449 isoform X1 (A)	-0.00899031	0.013755	0.0164325
gene-LOC110714789	K08235 xyloglucan:xyloglucosyl transferase [EC:2.4.1.207] | (RefSeq) xyloglucan endotransglucosylase/hydrolase protein 24-like (A)	-0.00421597	0.015877	0.0164272
gene-LOC110723825	K03452 magnesium/proton exchanger | (RefSeq) uncharacterized LOC18613571 (A)	-0.000600616	0.016415	0.0164259
gene-LOC110708783	K24028 salicylic acid 3-hydroxylase [EC:1.14.11.-] | (RefSeq) protein DMR6-LIKE OXYGENASE 1-like isoform X1 (A)	0.0100551	0.0129872	0.0164247
gene-LOC110702666	--	0.0100825	0.012965	0.016424
gene-LOC110689177	K12900 FUS-interacting serine-arginine-rich protein 1 | (RefSeq) serine/arginine-rich SC35-like splicing factor SCL33 (A)	0.0130318	-0.00998841	0.0164194
gene-LOC110727077	--	0.00788831	0.0143998	0.0164189
gene-LOC110691641	K01188 beta-glucosidase [EC:3.2.1.21] | (RefSeq) beta-glucosidase 12-like (A)	-0.0071241	0.0147897	0.0164161
gene-LOC110685769	K22262 WD repeat and FYVE domain-containing protein 3 | (RefSeq) protein SPIRRIG (A)	0.00431667	0.0158361	0.0164139
gene-LOC110724778	--	0.00572924	0.0153796	0.0164121
gene-LOC110686163	K10573 ubiquitin-conjugating enzyme E2 A [EC:2.3.2.23] | (RefSeq) ubiquitin-conjugating enzyme E2 2-like (A)	-0.0102218	0.0128366	0.0164093
gene-LOC110727697	K12130 pseudo-response regulator 5 | (RefSeq) two-component response regulator-like APRR5 isoform X1 (A)	-0.00912141	0.0136405	0.0164092
gene-LOC110729064	--	0.0104218	0.0126743	0.0164089
gene-LOC110694081	K15382 solute carrier family 50 (sugar transporter) | (RefSeq) bidirectional sugar transporter SWEET2-like (A)	-0.00981928	0.0131425	0.0164056
gene-LOC110735157	K00031 isocitrate dehydrogenase [EC:1.1.1.42] | (RefSeq) isocitrate dehydrogenase [NADP]-like (A)	-0.0103817	0.0127008	0.016404
gene-LOC110712841	K01097 N-acylneuraminate-9-phosphatase [EC:3.1.3.29] | (RefSeq) N-acylneuraminate-9-phosphatase isoform X1 (A)	0.00544135	-0.0154748	0.0164036
gene-LOC110711306	--	-0.00190935	0.016287	0.0163986
gene-LOC110722582	--	-0.00227483	0.0162392	0.0163977
gene-LOC110710968	--	-0.0103768	0.0126951	0.0163964
gene-LOC110686377	K13811 3'-phosphoadenosine 5'-phosphosulfate synthase [EC:2.7.7.4 2.7.1.25] | (RefSeq) ATP sulfurylase 2-like (A)	0.0118347	-0.0113473	0.0163958
gene-LOC110694254	K01177 beta-amylase [EC:3.2.1.2] | (RefSeq) beta-amylase 3, chloroplastic-like (A)	0.013741	-0.0089446	0.0163958
gene-LOC110738259	K13648 alpha-1,4-galacturonosyltransferase [EC:2.4.1.43] | (RefSeq) probable galacturonosyltransferase 3 (A)	-0.00735148	0.0146526	0.0163934
gene-LOC110698088	--	0.00186999	-0.0162861	0.0163931
gene-LOC110692251	--	0.00442269	-0.0157744	0.0163827
gene-LOC110710789	--	-0.0027202	0.0161536	0.0163811
gene-LOC110685434	--	0.00246607	0.0161939	0.0163806
gene-LOC110682526	K13420 LRR receptor-like serine/threonine-protein kinase FLS2 [EC:2.7.11.1] | (RefSeq) LRR receptor-like serine/threonine-protein kinase FLS2 (A)	-0.0104164	0.0126406	0.0163794
gene-LOC110686140	K12835 ATP-dependent RNA helicase DDX42 [EC:3.6.4.13] | (RefSeq) DEAD-box ATP-dependent RNA helicase 24 isoform X1 (A)	0.00766101	0.0144669	0.0163701
gene-LOC110714848	--	0.00172912	-0.0162722	0.0163638
gene-LOC110730521	--	0.0123523	-0.0107284	0.0163609
gene-LOC110693246	K22133 oxalate---CoA ligase [EC:6.2.1.8] | (RefSeq) oxalate--CoA ligase (A)	-0.00443353	0.0157468	0.016359
gene-LOC110705510	K15172 transcription elongation factor SPT5 | (RefSeq) hypothetical protein (A)	-0.00848888	0.0139773	0.0163531
gene-LOC110686743	--	-0.000460507	-0.0163466	0.0163531
gene-LOC110706938	K10695 E3 ubiquitin-protein ligase RNF1/2 [EC:2.3.2.27] | (RefSeq) putative E3 ubiquitin-protein ligase RING1a isoform X1 (A)	0.00614188	0.0151548	0.0163521
gene-LOC110738279	K17964 leucine-rich PPR motif-containing protein, mitochondrial | (RefSeq) pentatricopeptide repeat-containing protein At1g62910 (A)	-0.00119253	0.0163014	0.016345
gene-LOC110720432	--	-0.00735377	0.0145967	0.0163445
gene-LOC110714392	K09775 uncharacterized protein | (RefSeq) hypothetical protein (A)	0.01064	-0.0124056	0.0163435
gene-LOC110727138	K02911 large subunit ribosomal protein L32 | (RefSeq) uncharacterized protein LOC110727138 (A)	0.00924376	0.0134764	0.016342
gene-LOC110722884	K22048 mechanosensitive ion channel protein 4/5/6/7/8/9/10 | (RefSeq) mechanosensitive ion channel protein 6-like (A)	-0.00648642	0.0149995	0.0163419
gene-LOC110721053	K00430 peroxidase [EC:1.11.1.7] | (RefSeq) peroxidase 12-like (A)	-0.00928897	0.0134328	0.0163317
gene-LOC110736170	K10277 lysine-specific demethylase 8 [EC:1.14.11.27] | (RefSeq) lysine-specific demethylase JMJ30-like (A)	-0.00745772	0.0145276	0.01633
gene-LOC110715148	--	0.0122609	0.0107849	0.0163293
gene-LOC110682258	K15223 upstream activation factor subunit UAF30 | (RefSeq) upstream activation factor subunit spp27-like (A)	0.0110312	-0.0120362	0.0163266
gene-LOC110709296	--	0.00645885	-0.0149918	0.0163239
gene-LOC110688322	K12897 transformer-2 protein | (RefSeq) serine/arginine-rich splicing factor SR45a-like (A)	0.00937458	-0.0133588	0.01632
gene-LOC110706709	--	-0.00886618	0.0136976	0.0163167
gene-LOC110686006	K01611 S-adenosylmethionine decarboxylase [EC:4.1.1.50] | (RefSeq) S-adenosylmethionine decarboxylase proenzyme-like (A)	0.0123237	-0.0106908	0.0163146
gene-LOC110698554	--	-0.00915889	0.0134992	0.016313
gene-LOC110721434	K23541 Ca2+/H+ antiporter, TMEM165/GDT1 family | (RefSeq) pentatricopeptide repeat-containing protein At2g03880, mitochondrial (A)	-0.00642858	0.0149911	0.0163113
gene-LOC110705713	K00820 glutamine---fructose-6-phosphate transaminase (isomerizing) [EC:2.6.1.16] | (RefSeq) glutamine--fructose-6-phosphate aminotransferase [isomerizing] 2-like isoform X1 (A)	-0.00792745	0.0142524	0.0163088
gene-LOC110738364	K17098 annexin D | (RefSeq) annexin-like protein RJ4 (A)	0.00654683	0.0149336	0.0163056
gene-LOC110732405	K20222 importin-5 | (RefSeq) importin-5-like isoform X1 (A)	0.01094	-0.0120872	0.0163029
gene-LOC110690235	--	0.0149711	0.00645161	0.016302
gene-LOC110690215	K17767 AH receptor-interacting protein | (RefSeq) peptidyl-prolyl cis-trans isomerase FKBP62-like (A)	0.00923829	0.0134296	0.0163003
gene-LOC110733502	K09286 EREBP-like factor | (RefSeq) dehydration-responsive element-binding protein 2C-like (A)	-0.0062785	0.0150416	0.0162994
gene-LOC110701122	K05391 cyclic nucleotide gated channel, plant | (RefSeq) cyclic nucleotide-gated ion channel 1 isoform X1 (A)	-0.0138715	0.00855338	0.0162966
gene-LOC110732233	--	-0.00991318	0.0129304	0.0162931
gene-LOC110708427	K10046 GDP-D-mannose 3', 5'-epimerase [EC:5.1.3.18 5.1.3.-] | (RefSeq) GDP-mannose 3,5-epimerase 2 (A)	0.0116923	-0.0113435	0.0162907
gene-LOC110701263	K19882 O-palmitoleoyl-L-serine hydrolase [EC:3.1.1.98] | (RefSeq) pectin acetylesterase 6-like (A)	0.0108431	-0.0121563	0.0162895
gene-LOC110701227	K00789 S-adenosylmethionine synthetase [EC:2.5.1.6] | (RefSeq) S-adenosylmethionine synthase 4 (A)	0.00522387	-0.0154289	0.0162892
gene-LOC110695051	K12309 beta-galactosidase [EC:3.2.1.23] | (Kazusa) Lj3g3v0323160.1; - (A)	-0.00702932	0.0146921	0.0162871
gene-LOC110689281	--	-0.00476744	0.0155723	0.0162858
gene-LOC110715978	K22733 magnesium transporter | (RefSeq) uncharacterized protein LOC102612526 (A)	-0.00312897	0.0159805	0.0162839
gene-LOC110720645	K21989 calcium permeable stress-gated cation channel | (RefSeq) CSC1-like protein RXW8 (A)	-0.0107046	0.0122705	0.0162835
gene-LOC110701085	--	0.0033805	0.0159266	0.0162814
gene-LOC110733042	K01303 acylaminoacyl-peptidase [EC:3.4.19.1] | (RefSeq) acylamino-acid-releasing enzyme-like (A)	-0.0106025	0.0123554	0.016281
gene-LOC110691883	K00784 ribonuclease Z [EC:3.1.26.11] | (RefSeq) tRNase Z TRZ2, chloroplastic-like (A)	0.00105188	0.0162465	0.0162806
gene-LOC110733828	K00827 alanine-glyoxylate transaminase / (R)-3-amino-2-methylpropionate-pyruvate transaminase [EC:2.6.1.44 2.6.1.40] | (RefSeq) alanine--glyoxylate aminotransferase 2 homolog 1, mitochondrial-like (A)	-0.00206263	0.0161446	0.0162759
gene-LOC110706918	K01968 3-methylcrotonyl-CoA carboxylase alpha subunit [EC:6.4.1.4] | (RefSeq) methylcrotonoyl-CoA carboxylase subunit alpha, mitochondrial (A)	-0.00980228	0.0129901	0.0162735
gene-LOC110700580	K22262 WD repeat and FYVE domain-containing protein 3 | (RefSeq) protein SPIRRIG (A)	-0.00465374	0.0155908	0.0162705
gene-LOC110701395	K19525 vacuolar protein sorting-associated protein 13A/C | (RefSeq) hypothetical protein (A)	-0.0110107	0.0119754	0.0162679
gene-LOC110737912	K12486 stromal membrane-associated protein | (RefSeq) ADP-ribosylation factor GTPase-activating protein AGD12 isoform X1 (A)	-0.00542773	0.0153314	0.0162638
gene-LOC110700633	K12127 pseudo-response regulator 1 | (RefSeq) two-component response regulator-like APRR1 (A)	-0.00745115	0.0144556	0.016263
gene-LOC110691041	K22683 aspartyl protease family protein [EC:3.4.23.-] | (RefSeq) hypothetical protein (A)	0.00687433	0.0147385	0.0162628
gene-LOC110698434	K09515 DnaJ homolog subfamily B member 9 | (RefSeq) molecular chaperone DnaJ (A)	-0.00972294	0.0130351	0.0162619
gene-LOC110700869	K15692 E3 ubiquitin-protein ligase RNF13 [EC:2.3.2.27] | (RefSeq) RING-H2 finger protein ATL74-like (A)	-0.00944927	0.0132324	0.0162599
gene-LOC110682085	K14611 solute carrier family 23 (nucleobase transporter), member 1 | (RefSeq) nucleobase-ascorbate transporter 11-like (A)	0.00412004	0.0157288	0.0162594
gene-LOC110685750	K08238 xyloglucan 6-xylosyltransferase [EC:2.4.2.39] | (RefSeq) probable xyloglucan 6-xylosyltransferase 5 (A)	0.0135448	-0.00898264	0.0162526
gene-LOC110699267	--	-0.00375736	0.0158112	0.0162515
gene-LOC110718565	K16224 senescence-induced receptor-like serine/threonine-protein kinase | (RefSeq) senescence-induced receptor-like serine/threonine-protein kinase (A)	0.0136532	-0.00881219	0.0162501
gene-LOC110731340	--	0.00617531	0.0150293	0.0162486
gene-LOC110717085	--	0.0150023	0.00623573	0.0162467
gene-LOC110730577	K22484 transcriptional regulator CBF1 | (RefSeq) transcription factor bHLH106-like (A)	-0.00783324	0.0142325	0.0162458
gene-LOC110695064	--	-0.00872084	0.0137046	0.0162441
gene-LOC110724203	--	-0.00933282	0.0132865	0.0162368
gene-LOC110719925	--	0.010569	0.0123241	0.0162354
gene-LOC110738041	--	-0.00491239	0.0154722	0.0162333
gene-LOC110712517	--	0.00910335	0.0134404	0.0162331
gene-LOC110710251	K03231 elongation factor 1-alpha | (RefSeq) elongation factor 1-alpha (A)	-0.0116419	0.0113069	0.016229
gene-LOC110715678	K18666 activating signal cointegrator complex subunit 1 | (RefSeq) uncharacterized protein LOC110715678 isoform X1 (A)	-0.00794599	0.0141487	0.0162273
gene-LOC110686730	K01206 alpha-L-fucosidase [EC:3.2.1.51] | (RefSeq) alpha-L-fucosidase 3 (A)	-0.00104838	0.0161932	0.0162271
gene-LOC110701311	K00128 aldehyde dehydrogenase (NAD+) [EC:1.2.1.3] | (RefSeq) aldehyde dehydrogenase family 3 member H1-like isoform X1 (A)	-0.0105315	-0.0123405	0.0162234
gene-LOC110736853	K13511 monolysocardiolipin acyltransferase [EC:2.3.1.-] | (RefSeq) uncharacterized protein LOC110736853 (A)	-0.0113491	0.0115919	0.0162227
gene-LOC110715107	--	0.0129379	0.00978474	0.0162213
gene-LOC110704778	K01303 acylaminoacyl-peptidase [EC:3.4.19.1] | (RefSeq) uncharacterized LOC101311565 (A)	-0.0120647	0.010842	0.0162205
gene-LOC110731315	K13347 peroxisomal membrane protein 2 | (RefSeq) peroxisomal membrane protein PMP22-like (A)	-0.0115952	0.011342	0.01622
gene-LOC110734418	K01051 pectinesterase [EC:3.1.1.11] | (RefSeq) pectinesterase 1-like (A)	0.00344189	0.0158444	0.016214
gene-LOC110682094	K01534 Cd2+/Zn2+-exporting ATPase [EC:3.6.3.3 3.6.3.5] | (RefSeq) cadmium/zinc-transporting ATPase HMA3-like (A)	0.00733478	-0.0144597	0.0162136
gene-LOC110704295	K01738 cysteine synthase [EC:2.5.1.47] | (RefSeq) bifunctional L-3-cyanoalanine synthase/cysteine synthase-like (A)	0.0107375	0.0121474	0.0162127
gene-LOC110690457	K12900 FUS-interacting serine-arginine-rich protein 1 | (RefSeq) serine/arginine-rich SC35-like splicing factor SCL30A (A)	0.0104351	0.0124078	0.0162125
gene-LOC110725472	--	0.00411339	-0.0156819	0.0162124
gene-LOC110685218	K07517 Delta3-Delta2-enoyl-CoA isomerase [EC:5.3.3.8] | (RefSeq) uncharacterized protein LOC18427060 (A)	0.0109852	0.0119233	0.0162124
gene-LOC110710354	K21580 reticuline N-methyltransferase [EC:2.1.1.337] | (RefSeq) N-methyltransferase 4 (A)	0.0143743	-0.00749757	0.0162121
gene-LOC110688992	K14400 pre-mRNA cleavage complex 2 protein Pcf11 | (RefSeq) LOW QUALITY PROTEIN: uncharacterized protein LOC111982967 (A)	0.00837819	0.0138786	0.0162114
gene-LOC110737726	K11253 histone H3 | (RefSeq) histone H3.2 (A)	0.00731618	0.014465	0.0162099
gene-LOC110733344	K01930 folylpolyglutamate synthase [EC:6.3.2.17] | (RefSeq) folylpolyglutamate synthase-like (A)	0.010897	-0.0119978	0.0162078
gene-LOC110688394	K14494 DELLA protein | (RefSeq) DELLA protein RGL1-like (A)	-0.00546249	0.0152578	0.0162062
gene-LOC110739737	--	0.000405679	0.0161987	0.0162038
gene-LOC110719398	K14270 aminotransferase | (RefSeq) probable aminotransferase ACS10 (A)	-0.00056467	-0.0161939	0.0162037
gene-LOC110693593	K00384 thioredoxin reductase (NADPH) [EC:1.8.1.9] | (RefSeq) thioredoxin reductase 2-like (A)	0.0150277	0.00605832	0.0162029
gene-LOC110730315	K13783 MFS transporter, OPA family, solute carrier family 37 (glycerol-3-phosphate transporter), member 1/2 | (RefSeq) putative glycerol-3-phosphate transporter 4 (A)	0.0122344	-0.0106151	0.0161975
gene-LOC110725279	K10878 meiotic recombination protein SPO11 | (RefSeq) topoisomerase (A)	0.00277599	0.0159571	0.0161967
gene-LOC110737450	--	0.0103557	-0.0124495	0.0161935
gene-LOC110721241	K21596 calmodulin-binding transcription activator | (RefSeq) calmodulin-binding transcription activator 6-like (A)	0.0109326	0.0119456	0.0161932
gene-LOC110703526	K18643 katanin p80 WD40 repeat-containing subunit B1 | (RefSeq) uncharacterized LOC105795008 (A)	-0.00362187	0.0157807	0.016191
gene-LOC110708497	--	0.00330168	0.0158507	0.0161909
gene-LOC110707942	K22519 protein disulfide-isomerase [EC:5.3.4.1] | (RefSeq) protein disulfide isomerase pTAC5, chloroplastic-like (A)	-0.00791088	0.0141217	0.0161865
gene-LOC110698570	K15223 upstream activation factor subunit UAF30 | (RefSeq) upstream activation factor subunit spp27-like isoform X1 (A)	-0.0110338	0.0118423	0.016186
gene-LOC110684085	--	0.010709	0.0121363	0.0161856
gene-LOC110708754	K03452 magnesium/proton exchanger | (RefSeq) uncharacterized LOC18613571 (A)	-0.00311736	0.0158817	0.0161848
gene-LOC110738365	--	0.00862448	-0.0136861	0.0161769
gene-LOC110717796	K00423 L-ascorbate oxidase [EC:1.10.3.3] | (RefSeq) L-ascorbate oxidase (A)	0.00530093	0.0152834	0.0161766
gene-LOC110714757	K13459 disease resistance protein RPS2 | (RefSeq) disease resistance protein At4g27190-like (A)	-0.00704429	0.0145609	0.0161753
gene-LOC110698678	--	0.00285431	-0.0159148	0.0161687
gene-LOC110696029	K03319 divalent anion:Na+ symporter, DASS family | (RefSeq) dicarboxylate transporter 2.1, chloroplastic-like (A)	-0.00191457	-0.0160395	0.0161533
gene-LOC110724849	--	0.000726849	0.0161357	0.0161521
gene-LOC110700389	K10956 protein transport protein SEC61 subunit alpha | (RefSeq) protein transport protein Sec61 subunit alpha-like (A)	-0.00690145	0.014603	0.0161517
gene-LOC110695496	--	0.00540483	0.0152182	0.0161495
gene-LOC110686425	K23717 solute carrier family 23 (nucleobase transporter), member 2 | (RefSeq) nucleobase-ascorbate transporter 4-like (A)	-0.0119038	0.0109114	0.0161481
gene-LOC110717971	K00472 prolyl 4-hydroxylase [EC:1.14.11.2] | (RefSeq) probable prolyl 4-hydroxylase 3 (A)	0.00170214	-0.0160581	0.016148
gene-LOC110739993	K00275 pyridoxamine 5'-phosphate oxidase [EC:1.4.3.5] | (RefSeq) pyridoxamine 5'-phosphate oxidase isoform 1 (A)	0.00919116	-0.0132729	0.0161446
gene-LOC110698625	K00864 glycerol kinase [EC:2.7.1.30] | (RefSeq) glycerol kinase-like (A)	-0.008364	0.0138084	0.016144
gene-LOC110723167	K14564 nucleolar protein 56 | (RefSeq) uncharacterized protein LOC108225321 (A)	0.00833624	0.013822	0.0161412
gene-LOC110687601	--	0.00174768	0.0160446	0.0161395
gene-LOC110723110	K14818 ribosome assembly protein SQT1 | (RefSeq) uncharacterized WD repeat-containing protein C25H1.08c-like (A)	0.0126372	0.010039	0.0161394
gene-LOC110715755	K07297 adiponectin receptor | (RefSeq) heptahelical transmembrane protein 2-like (A)	-0.0089339	0.0134397	0.0161381
gene-LOC110720609	K19044 E3 ubiquitin-protein ligase XBAT32/33 [EC:2.3.2.27] | (RefSeq) E3 ubiquitin-protein ligase XBAT32-like (A)	-0.00227513	0.0159744	0.0161356
gene-LOC110682987	--	-0.00771192	0.0141723	0.0161347
gene-LOC110736797	K09510 DnaJ homolog subfamily B member 4 | (RefSeq) dnaJ homolog subfamily B member 4-like (A)	-0.0105255	0.0122285	0.0161345
gene-LOC110702044	K02934 large subunit ribosomal protein L6e | (RefSeq) 60S ribosomal protein L6-like isoform X1 (A)	0.00929057	-0.013191	0.0161343
gene-LOC110707889	K22733 magnesium transporter | (RefSeq) uncharacterized protein LOC102612526 (A)	-0.0035068	0.0157482	0.0161339
gene-LOC110692765	K20770 (+)-delta-cadinene 8-hydroxylase [EC:1.14.-.-] | (RefSeq) flavonoid 3'-monooxygenase-like (A)	0.00994609	-0.0126992	0.0161306
gene-LOC110694212	--	-0.00800534	0.0140038	0.0161305
gene-LOC110690520	--	0.0137948	-0.0083594	0.01613
gene-LOC110701740	K03452 magnesium/proton exchanger | (RefSeq) uncharacterized LOC18613571 (A)	-0.00178704	0.0160272	0.0161265
gene-LOC110720099	K07408 cytochrome P450 family 1 subfamily A polypeptide 1 [EC:1.14.14.1] | (RefSeq) cytochrome P450 71A1-like (A)	-0.0111946	0.0115997	0.0161206
gene-LOC110705200	K13258 2-hydroxyisoflavanone dehydratase [EC:4.2.1.105] | (RefSeq) 2-hydroxyisoflavanone dehydratase (A)	-0.0125596	0.0100989	0.0161162
gene-LOC110691003	K02639 ferredoxin | (RefSeq) ferredoxin-2-like (A)	0.00988521	-0.0127272	0.0161152
gene-LOC110681597	K21374 7-deoxyloganetin glucosyltransferase [EC:2.4.1.324] | (RefSeq) UDP-glycosyltransferase 85A2-like (A)	-0.00172958	0.0160212	0.0161143
gene-LOC110705084	--	0.00681852	-0.0145898	0.0161045
gene-LOC110740114	K22522 cytokinin riboside 5'-monophosphate phosphoribohydrolase [EC:3.2.2.-] | (RefSeq) cytokinin riboside 5'-monophosphate phosphoribohydrolase LOG5-like (A)	-0.0104951	0.0122146	0.0161042
gene-LOC110734313	K15920 xylan 1,4-beta-xylosidase [EC:3.2.1.37] | (RefSeq) beta-xylosidase/alpha-L-arabinofuranosidase 2 (A)	-1.36166e-05	0.0161041	0.0161041
gene-LOC110724284	K13435 serine/threonine-protein kinase Pto | (RefSeq) Pto; serine/threonine protein kinase Pto (A)	-0.00973421	0.0128273	0.0161026
gene-LOC110718605	--	0.0118796	-0.0108685	0.0161012
gene-LOC110736968	K13754 solute carrier family 24 (sodium/potassium/calcium exchanger), member 6 | (RefSeq) cation/calcium exchanger 5-like (A)	0.00754107	0.0142259	0.0161011
gene-LOC110731399	K00677 UDP-N-acetylglucosamine acyltransferase [EC:2.3.1.129] | (RefSeq) probable acyl-[acyl-carrier-protein]--UDP-N-acetylglucosamine O-acyltransferase, mitochondrial isoform X1 (A)	-0.00428311	0.0155205	0.0161007
gene-LOC110719981	--	0.00459631	0.0154307	0.0161007
gene-LOC110714564	K13229 2,4-dihydroxy-1,4-benzoxazin-3-one-glucoside dioxygenase [EC:1.14.20.2] | (RefSeq) bx6; DIBOA-glucoside dioxygenase BX6 (A)	-0.0056312	0.0150822	0.0160992
gene-LOC110739753	K13435 serine/threonine-protein kinase Pto | (RefSeq) Pto; serine/threonine protein kinase Pto (A)	-0.00685329	0.0145668	0.0160984
gene-LOC110730313	K20222 importin-5 | (RefSeq) importin-5-like isoform X1 (A)	0.0097785	-0.0127869	0.0160973
gene-LOC110686840	--	0.00544743	-0.0151438	0.0160938
gene-LOC110691741	K11978 E3 ubiquitin-protein ligase UBR3 [EC:2.3.2.27] | (RefSeq) E3 ubiquitin-protein ligase PRT6-like isoform X1 (A)	-0.0118375	0.0108969	0.0160894
gene-LOC110684678	K13354 solute carrier family 25 (peroxisomal adenine nucleotide transporter), member 17 | (RefSeq) peroxisomal nicotinamide adenine dinucleotide carrier-like (A)	-0.00465951	0.0153998	0.0160893
gene-LOC110712011	K19041 E3 ubiquitin-protein ligase RNF38/44 [EC:2.3.2.27] | (RefSeq) probable E3 ubiquitin-protein ligase HIP1 (A)	0.0113588	0.0113915	0.0160868
gene-LOC110706248	--	0.0120952	0.0106039	0.0160853
gene-LOC110731162	K09503 DnaJ homolog subfamily A member 2 | (RefSeq) dnaJ protein homolog ANJ1-like (A)	0.00741645	0.0142732	0.0160851
gene-LOC110689105	--	0.0139268	0.00804787	0.0160849
gene-LOC110718375	K12501 homogentisate solanesyltransferase [EC:2.5.1.117] | (RefSeq) hypothetical protein (A)	0.00851015	-0.0136475	0.0160834
gene-LOC110691191	--	0.0126074	0.00997982	0.0160793
gene-LOC110682188	K00232 acyl-CoA oxidase [EC:1.3.3.6] | (RefSeq) acyl-coenzyme A oxidase 2, peroxisomal-like (A)	-0.00726284	0.014344	0.0160779
gene-LOC110712242	K14504 xyloglucan:xyloglucosyl transferase TCH4 [EC:2.4.1.207] | (RefSeq) probable xyloglucan endotransglucosylase/hydrolase protein 23 (A)	0.00626368	0.0148062	0.0160766
gene-LOC110710941	K01177 beta-amylase [EC:3.2.1.2] | (RAP-DB) Os03g0141200; Similar to Beta-amylase PCT-BMYI (EC 3.2.1.2). (A)	0.0125469	-0.0100515	0.0160766
gene-LOC110700162	--	0.0153732	0.00470038	0.0160757
gene-LOC110720590	K15706 E3 ubiquitin-protein ligase RNF167 [EC:2.3.2.27] | (RefSeq) RING-H2 finger protein ATL74 (A)	-0.00917889	0.0131948	0.0160735
gene-LOC110732712	K19882 O-palmitoleoyl-L-serine hydrolase [EC:3.1.1.98] | (RefSeq) pectin acetylesterase 8-like isoform X1 (A)	-0.00716869	0.0143838	0.0160712
gene-LOC110703849	K11094 U2 small nuclear ribonucleoprotein B'' | (RefSeq) U2 small nuclear ribonucleoprotein B''-like isoform X1 (A)	0.0138569	-0.0081332	0.0160675
gene-LOC110733492	K00522 ferritin heavy chain [EC:1.16.3.2] | (RefSeq) ferritin-3, chloroplastic-like (A)	0.00948616	-0.0129682	0.0160674
gene-LOC110707279	--	0.00314999	0.015755	0.0160669
gene-LOC110723814	K20417 palmitoyl-[glycerolipid] 3-(E)-desaturase [EC:1.14.19.43] | (RefSeq) LOW QUALITY PROTEIN: fatty acid desaturase 4, chloroplastic-like (A)	0.00497094	-0.0152775	0.0160658
gene-LOC110735500	--	0.0111304	0.0115823	0.0160635
gene-LOC110735783	K22262 WD repeat and FYVE domain-containing protein 3 | (RefSeq) protein SPIRRIG (A)	0.000435921	0.0160563	0.0160622
gene-LOC110700577	K17964 leucine-rich PPR motif-containing protein, mitochondrial | (RefSeq) putative pentatricopeptide repeat-containing protein At1g19290 (A)	0.00247585	0.0158695	0.0160615
gene-LOC110683732	K03231 elongation factor 1-alpha | (RefSeq) elongation factor 1-alpha-like (A)	-0.0123237	0.0102943	0.0160576
gene-LOC110707910	--	0.000301089	0.0160521	0.0160549
gene-LOC110724677	K09264 MADS-box transcription factor, plant | (RefSeq) MADS-box transcription factor 23-like isoform X1 (A)	0.0143813	-0.00713218	0.0160527
gene-LOC110686621	--	0.00196557	-0.0159298	0.0160506
gene-LOC110706435	K23280 rhamnogalacturonan I rhamnosyltransferase [EC:2.4.1.351] | (RefSeq) uncharacterized protein LOC101257103 isoform X1 (A)	0.00206923	-0.0159159	0.0160498
gene-LOC110737044	K01738 cysteine synthase [EC:2.5.1.47] | (RefSeq) cysteine synthase-like (A)	-0.0104086	0.0122161	0.0160491
gene-LOC110739752	K13148 integrator complex subunit 11 [EC:3.1.27.-] | (RefSeq) cleavage and polyadenylation specificity factor subunit 3-II-like isoform X1 (A)	-0.0073676	0.014254	0.0160455
gene-LOC110681624	--	0.00609774	0.014839	0.016043
gene-LOC110697301	--	0.00928501	-0.0130805	0.0160409
gene-LOC110709254	K00873 pyruvate kinase [EC:2.7.1.40] | (RefSeq) pyruvate kinase 1, cytosolic-like (A)	-0.0101944	0.0123766	0.0160345
gene-LOC110736309	K18159 NADH dehydrogenase [ubiquinone] 1 alpha subcomplex assembly factor 1 | (RefSeq) hypothetical protein (A)	-0.00804635	-0.0138689	0.016034
gene-LOC110738606	K01081 5'-nucleotidase [EC:3.1.3.5] | (RefSeq) HAD-superfamily hydrolase, subfamily IG,5'-nucleotidase (A)	-0.0121309	0.0104823	0.0160324
gene-LOC110724681	K00600 glycine hydroxymethyltransferase [EC:2.1.2.1] | (RefSeq) serine hydroxymethyltransferase 2, mitochondrial-like (A)	-0.00606055	0.014838	0.016028
gene-LOC110705337	--	-0.0110638	0.0115901	0.0160231
gene-LOC110718463	K20628 expansin | (RefSeq) expansin-B3-like (A)	0.014288	0.00725043	0.0160223
gene-LOC110688567	K23541 Ca2+/H+ antiporter, TMEM165/GDT1 family | (RefSeq) pentatricopeptide repeat-containing protein At4g21065-like (A)	4.74747e-05	0.016021	0.0160211
gene-LOC110722854	K10280 F-box and leucine-rich repeat protein 14 | (RefSeq) L domain-like protein (A)	-0.00966197	0.0127777	0.0160194
gene-LOC110712320	K08247 methionine S-methyltransferase [EC:2.1.1.12] | (RefSeq) methionine S-methyltransferase (A)	-0.00451464	0.0153635	0.0160131
gene-LOC110727503	--	-0.00655318	0.0146098	0.0160122
gene-LOC110721365	K17098 annexin D | (RefSeq) annexin D4 (A)	-0.0107911	0.0118251	0.0160088
gene-LOC110710981	--	0.00859369	-0.0135065	0.0160086
gene-LOC110682540	K23541 Ca2+/H+ antiporter, TMEM165/GDT1 family | (RefSeq) pentatricopeptide repeat-containing protein At4g21065-like (A)	0.00102476	0.0159756	0.0160084
gene-LOC110690915	K01183 chitinase [EC:3.2.1.14] | (RefSeq) chitotriosidase-1-like isoform X1 (A)	-0.000198535	0.0160026	0.0160038
gene-LOC110731474	K17609 nucleoredoxin [EC:1.8.1.8] | (RefSeq) hypothetical protein (A)	0.00381979	0.0155411	0.0160037
gene-LOC110714197	K08734 DNA mismatch repair protein MLH1 | (RefSeq) DNA mismatch repair protein MLH1-like (A)	0.00450766	0.015355	0.0160029
gene-LOC110711472	K22262 WD repeat and FYVE domain-containing protein 3 | (RefSeq) protein SPIRRIG (A)	-0.0041806	0.0154464	0.0160022
gene-LOC110707216	K20368 protein cornichon | (RefSeq) protein cornichon homolog 1-like isoform X1 (A)	0.0127239	0.00970361	0.0160018
gene-LOC110705336	K00679 phospholipid:diacylglycerol acyltransferase [EC:2.3.1.158] | (RefSeq) hypothetical protein (A)	0.0115292	0.0110893	0.0159967
gene-LOC110704165	K12124 GIGANTEA | (RefSeq) protein GIGANTEA (A)	-0.00948822	0.0128783	0.0159962
gene-LOC110713209	--	0.0125416	0.00992457	0.0159934
gene-LOC110694053	--	0.0105124	0.0120491	0.0159904
gene-LOC110706800	K15047 heterogeneous nuclear ribonucleoprotein U-like protein 1 | (RefSeq) heterogeneous nuclear ribonucleoprotein U-like protein 1 (A)	0.00697822	0.0143867	0.0159897
gene-LOC110690623	K12890 splicing factor, arginine/serine-rich 1 | (RefSeq) uncharacterized protein LOC103422586 isoform X1 (A)	0.0132684	-0.00891636	0.015986
gene-LOC110701912	--	-0.000453761	0.015977	0.0159835
gene-LOC110687046	K03655 ATP-dependent DNA helicase RecG [EC:3.6.4.12] | (RefSeq) ATP-dependent DNA helicase homolog RECG, chloroplastic (A)	-0.0109231	0.0116645	0.0159805
gene-LOC110697280	--	0.00781638	0.0139365	0.0159788
gene-LOC110700825	K23541 Ca2+/H+ antiporter, TMEM165/GDT1 family | (RefSeq) pentatricopeptide repeat-containing protein At4g21065-like isoform X1 (A)	-0.00420999	0.0154115	0.0159762
gene-LOC110681806	K00963 UTP--glucose-1-phosphate uridylyltransferase [EC:2.7.7.9] | (RefSeq) UTP--glucose-1-phosphate uridylyltransferase (A)	-0.00806475	0.0137895	0.0159747
gene-LOC110687373	--	0.0039041	0.0154874	0.0159719
gene-LOC110683758	K22262 WD repeat and FYVE domain-containing protein 3 | (RefSeq) protein SPIRRIG (A)	-0.00343002	0.0155961	0.0159688
gene-LOC110690914	K01183 chitinase [EC:3.2.1.14] | (RefSeq) chitotriosidase-1-like (A)	-0.0074444	0.0141261	0.0159676
gene-LOC110690852	K22074 NFU1 iron-sulfur cluster scaffold homolog, mitochondrial | (RefSeq) nifU-like protein 1, chloroplastic (A)	-0.0102726	0.0122228	0.0159663
gene-LOC110686812	K15255 ATP-dependent DNA helicase PIF1 [EC:3.6.4.12] | (RefSeq) ATP-dependent DNA helicase PIF2-like (A)	0.00141435	-0.0159018	0.0159646
gene-LOC110717343	K01081 5'-nucleotidase [EC:3.1.3.5] | (RefSeq) HAD-superfamily hydrolase, subfamily IG,5'-nucleotidase (A)	-0.0115899	0.0109679	0.0159569
gene-LOC110721794	--	0.011403	-0.011162	0.0159568
gene-LOC110720439	K14638 solute carrier family 15 (peptide/histidine transporter), member 3/4 | (RefSeq) protein NRT1/ PTR FAMILY 7.3-like (A)	-0.0128195	0.00949247	0.0159514
gene-LOC110738717	--	-0.00945577	0.0128443	0.0159495
gene-LOC110721130	K03511 DNA polymerase kappa [EC:2.7.7.7] | (RefSeq) DNA polymerase kappa (A)	-0.0103906	0.0120977	0.0159474
gene-LOC110715066	K09874 aquaporin NIP | (RefSeq) aquaporin NIP1-2-like isoform X1 (A)	-0.00187064	0.0158371	0.0159472
gene-LOC110730401	--	0.00343579	-0.0155727	0.0159472
gene-LOC110708260	K12133 MYB-related transcription factor LHY | (RefSeq) uncharacterized protein LOC112280611 (A)	0.0118388	-0.0106795	0.0159439
gene-LOC110690528	K09264 MADS-box transcription factor, plant | (RefSeq) MADS-box protein FLOWERING LOCUS C-like (A)	-0.0105233	0.011966	0.015935
gene-LOC110690518	--	0.0124709	-0.00991923	0.0159347
gene-LOC110717953	K01213 galacturan 1,4-alpha-galacturonidase [EC:3.2.1.67] | (RefSeq) polygalacturonase At1g48100-like (A)	0.0124615	-0.00992403	0.0159304
gene-LOC110736843	K12890 splicing factor, arginine/serine-rich 1 | (RefSeq) serine/arginine-rich splicing factor SR30-like isoform X1 (A)	0.014045	-0.00751566	0.0159294
gene-LOC110706141	--	0.0139568	0.00767772	0.0159292
gene-LOC110721097	K21989 calcium permeable stress-gated cation channel | (RefSeq) CSC1-like protein RXW8 (A)	-0.011613	0.0109022	0.0159286
gene-LOC110691493	K21842 protein EFR3 | (RefSeq) uncharacterized protein LOC110691493 (A)	-0.0103376	0.0121162	0.015927
gene-LOC110693212	K23280 rhamnogalacturonan I rhamnosyltransferase [EC:2.4.1.351] | (RefSeq) uncharacterized protein At1g04910-like (A)	0.00800583	0.0137684	0.0159268
gene-LOC110736146	K19090 CRISPR-associated protein Cas5t | (RefSeq) putative pentatricopeptide repeat-containing protein At3g05240 (A)	0.0027299	0.0156904	0.0159262
gene-LOC110719982	K09287 RAV-like factor | (RefSeq) AP2/ERF and B3 domain-containing transcription factor RAV1-like (A)	-0.0101618	0.0122622	0.0159256
gene-LOC110690988	K14484 auxin-responsive protein IAA | (RefSeq) auxin-responsive protein IAA27-like (A)	0.0153822	-0.00412052	0.0159245
gene-LOC110711741	K00600 glycine hydroxymethyltransferase [EC:2.1.2.1] | (RefSeq) serine hydroxymethyltransferase 4 (A)	-0.00232974	-0.0157527	0.015924
gene-LOC110702870	K17560 unconventional prefoldin RPB5 interactor 1 | (RefSeq) RNA polymerase II subunit 5-mediating protein homolog (A)	-0.00641802	0.0145731	0.0159237
gene-LOC110727535	--	0.00738044	0.0141073	0.0159213
gene-LOC110681991	--	0.00981356	-0.0125355	0.0159199
gene-LOC110733563	--	0.00596459	-0.0147595	0.0159192
gene-LOC110711291	--	0.0143356	-0.00691974	0.0159183
gene-LOC110686155	--	0.0114744	-0.0110325	0.0159179
gene-LOC110686454	K03320 ammonium transporter, Amt family | (RefSeq) ammonium transporter 3 member 1-like isoform X1 (A)	-0.0113951	0.0111125	0.0159165
gene-LOC110735659	K12124 GIGANTEA | (RefSeq) protein GIGANTEA (A)	-0.00840488	0.0135146	0.015915
gene-LOC110682884	K03283 heat shock 70kDa protein 1/2/6/8 | (RefSeq) probable mediator of RNA polymerase II transcription subunit 37c (A)	0.0126402	-0.009669	0.0159143
gene-LOC110688242	K04125 gibberellin 2beta-dioxygenase [EC:1.14.11.13] | (RefSeq) gibberellin 2-beta-dioxygenase 8-like (A)	-0.000830542	0.0158905	0.0159122
gene-LOC110700358	K20606 mitogen-activated protein kinase kinase kinase ANP1 [EC:2.7.11.25] | (RefSeq) receptor-like serine/threonine-protein kinase SD1-7 isoform X1 (A)	-0.00724126	0.0141668	0.0159102
gene-LOC110711357	--	0.0134898	0.00843193	0.0159083
gene-LOC110690627	K01210 glucan 1,3-beta-glucosidase [EC:3.2.1.58] | (RefSeq) glucan 1,3-beta-glucosidase-like (A)	-0.00854648	0.0134154	0.0159064
gene-LOC110688713	--	0.00722485	-0.0141698	0.0159054
gene-LOC110725816	K08900 mitochondrial chaperone BCS1 | (RefSeq) AAA-ATPase At3g50940-like (A)	-0.00944261	0.0127969	0.0159036
gene-LOC110721015	--	0.00186048	-0.015785	0.0158943
gene-LOC110701180	K08675 ATP-dependent Lon protease [EC:3.4.21.53] | (RefSeq) lon protease homolog 1, mitochondrial-like (A)	0.00710783	0.0142146	0.0158927
gene-LOC110740087	K01673 carbonic anhydrase [EC:4.2.1.1] | (RefSeq) beta carbonic anhydrase 5, chloroplastic-like isoform X1 (A)	0.0147017	-0.00603193	0.015891
gene-LOC110698768	K11996 adenylyltransferase and sulfurtransferase [EC:2.7.7.80 2.8.1.11] | (RefSeq) adenylyltransferase and sulfurtransferase MOCS3-like (A)	0.00113414	-0.015845	0.0158856
gene-LOC110725780	K01637 isocitrate lyase [EC:4.1.3.1] | (RefSeq) isocitrate lyase-like (A)	-0.00353914	-0.0154856	0.0158848
gene-LOC110702871	K17964 leucine-rich PPR motif-containing protein, mitochondrial | (RefSeq) pentatricopeptide repeat-containing protein At5g61990, mitochondrial (A)	0.0065613	0.0144657	0.0158842
gene-LOC110738682	K13691 pathogen-inducible salicylic acid glucosyltransferase [EC:2.4.1.-] | (RefSeq) UDP-glycosyltransferase 74E2-like (A)	0.0139661	-0.00756609	0.0158839
gene-LOC110735044	--	0.00315288	0.0155672	0.0158833
gene-LOC110729694	--	0.0139455	-0.00760065	0.0158823
gene-LOC110686857	K07466 replication factor A1 | (RefSeq) replication protein A 70 kDa DNA-binding subunit B (A)	0.00203525	-0.0157513	0.0158823
gene-LOC110699358	--	-0.011133	0.0113261	0.0158816
gene-LOC110738219	--	0.01113	-0.0113228	0.0158771
gene-LOC110740032	--	0.00607697	-0.0146677	0.0158768
gene-LOC110705595	K14638 solute carrier family 15 (peptide/histidine transporter), member 3/4 | (RefSeq) protein NRT1/ PTR FAMILY 1.1-like (A)	0.0119506	0.0104521	0.0158765
gene-LOC110708574	K15040 voltage-dependent anion channel protein 2 | (RefSeq) mitochondrial outer membrane protein porin of 34 kDa-like (A)	0.0108417	0.0115972	0.0158757
gene-LOC110728142	K12160 small ubiquitin-related modifier | (RefSeq) small ubiquitin-related modifier 1-like (A)	-0.00541945	0.0149214	0.0158751
gene-LOC110718655	K03319 divalent anion:Na+ symporter, DASS family | (RefSeq) LOW QUALITY PROTEIN: dicarboxylate transporter 2.1, chloroplastic-like (A)	0.0123491	-0.00997198	0.0158727
gene-LOC110686020	--	0.00364177	0.0154491	0.0158725
gene-LOC110713464	K10767 mRNA N6-methyladenine demethylase [EC:1.14.11.53] | (RefSeq) uncharacterized protein LOC110713464 (A)	0.0132016	-0.00881191	0.0158724
gene-LOC110736754	K10260 F-box and WD-40 domain protein 7 | (RefSeq) WD40 repeat protein (A)	0.0103103	-0.0120632	0.0158689
gene-LOC110687952	K15503 serine/threonine-protein phosphatase 6 regulatory ankyrin repeat subunit B | (RefSeq) protein ACCELERATED CELL DEATH 6-like (A)	-0.00747571	0.0139951	0.0158666
gene-LOC110736541	K01206 alpha-L-fucosidase [EC:3.2.1.51] | (RefSeq) hypothetical protein (A)	0.00167351	0.0157683	0.0158569
gene-LOC110691177	--	-0.0072677	0.0140923	0.015856
gene-LOC110730824	--	0.0129715	0.00911455	0.0158535
gene-LOC110702563	--	-0.00995298	0.0123366	0.015851
gene-LOC110685413	--	-0.00736536	-0.0140346	0.0158499
gene-LOC110713443	--	-0.00483996	0.0150928	0.0158498
gene-LOC110723860	--	-0.00878534	0.0131912	0.015849
gene-LOC110691551	K01537 P-type Ca2+ transporter type 2C [EC:7.2.2.10] | (RefSeq) putative calcium-transporting ATPase 11, plasma membrane-type isoform X1 (A)	-0.0112943	0.0111176	0.0158481
gene-LOC110681969	K12120 phytochrome A | (RefSeq) phytochrome A-like (A)	-0.00597804	0.0146773	0.015848
gene-LOC110702767	K12135 zinc finger protein CONSTANS | (RefSeq) zinc finger protein CONSTANS-LIKE 2-like (A)	-0.012415	0.00985007	0.0158479
gene-LOC110729163	--	-0.00664812	0.014384	0.015846
gene-LOC110696047	K00873 pyruvate kinase [EC:2.7.1.40] | (RefSeq) LOW QUALITY PROTEIN: pyruvate kinase isozyme A, chloroplastic-like (A)	0.0118556	0.0105128	0.0158453
gene-LOC110684135	--	0.00481101	-0.0150864	0.0158349
gene-LOC110718549	K01181 endo-1,4-beta-xylanase [EC:3.2.1.8] | (RefSeq) probable endo-1,4-beta-xylanase C (A)	-0.00983645	0.0124064	0.0158327
gene-LOC110721893	K07297 adiponectin receptor | (RefSeq) heptahelical transmembrane protein 2-like (A)	-0.00959804	0.0125911	0.0158322
gene-LOC110719434	--	-0.00845632	0.0133842	0.0158318
gene-LOC110694500	K00020 3-hydroxyisobutyrate dehydrogenase [EC:1.1.1.31] | (RefSeq) probable 3-hydroxyisobutyrate dehydrogenase-like 2, mitochondrial (A)	-0.00890637	0.0130878	0.0158308
gene-LOC110719956	K00854 xylulokinase [EC:2.7.1.17] | (RefSeq) xylulose kinase-like (A)	-0.00365693	0.0154006	0.0158288
gene-LOC110715815	K07441 beta-1,4-N-acetylglucosaminyltransferase [EC:2.4.1.141] | (RefSeq) UDP-N-acetylglucosamine transferase subunit ALG14 homolog (A)	0.00943215	-0.0127111	0.0158284
gene-LOC110701000	K11886 proteasome component ECM29 | (RefSeq) proteasome-associated protein ECM29 homolog (A)	-0.011101	0.0112787	0.0158254
gene-LOC110686569	--	0.0139053	0.00755545	0.0158254
gene-LOC110688731	K18328 lariat debranching enzyme [EC:3.1.-.-] | (RefSeq) lariat debranching enzyme-like isoform X1 (A)	-0.00242172	0.0156355	0.0158219
gene-LOC110709595	K22596 gamma-glutamylcyclotransferase, plant [EC:4.3.2.9] | (RefSeq) gamma-glutamylcyclotransferase 2-3-like isoform X1 (A)	0.0130414	0.00895443	0.0158196
gene-LOC110728990	K01968 3-methylcrotonyl-CoA carboxylase alpha subunit [EC:6.4.1.4] | (RefSeq) methylcrotonoyl-CoA carboxylase subunit alpha, mitochondrial-like isoform X1 (A)	-0.00631319	0.0145052	0.0158195
gene-LOC110728170	K12197 charged multivesicular body protein 1 | (RefSeq) ESCRT-related protein CHMP1A (A)	-0.00909169	0.0129446	0.0158184
gene-LOC110739114	--	-0.00363042	0.015395	0.0158173
gene-LOC110713027	K08869 aarF domain-containing kinase | (RefSeq) predicted protein (A)	0.0123039	-0.00993939	0.015817
gene-LOC110693524	K17871 NADH:ubiquinone reductase (non-electrogenic) [EC:1.6.5.9] | (RefSeq) external alternative NAD(P)H-ubiquinone oxidoreductase B2, mitochondrial-like (A)	0.000977618	-0.0157845	0.0158147
gene-LOC110719812	--	0.0135039	0.00822356	0.0158108
gene-LOC110712007	K17286 erythrocyte band 7 integral membrane protein | (RefSeq) erythrocyte band 7 integral membrane protein-like (A)	-0.00828722	0.013464	0.01581
gene-LOC110713572	K08176 MFS transporter, PHS family, inorganic phosphate transporter | (RefSeq) LOW QUALITY PROTEIN: probable inorganic phosphate transporter 1-10 (A)	0.00789099	0.0136995	0.0158096
gene-LOC110733250	--	0.0136868	0.00791153	0.0158089
gene-LOC110708025	--	-0.00810392	0.0135715	0.0158069
gene-LOC110729625	K00873 pyruvate kinase [EC:2.7.1.40] | (RefSeq) pyruvate kinase 1, cytosolic-like (A)	-0.0122744	0.00995456	0.0158036
gene-LOC110710959	--	0.00673596	0.0142952	0.0158027
gene-LOC110729334	--	-0.00435268	0.015191	0.0158023
gene-LOC110691736	--	0.00734196	-0.0139872	0.015797
gene-LOC110734463	K01968 3-methylcrotonyl-CoA carboxylase alpha subunit [EC:6.4.1.4] | (RefSeq) methylcrotonoyl-CoA carboxylase subunit alpha, mitochondrial-like isoform X1 (A)	-0.00644461	0.0144215	0.015796
gene-LOC110738135	K13248 pyridoxal phosphate phosphatase PHOSPHO2 [EC:3.1.3.74] | (RefSeq) inorganic pyrophosphatase 1-like (A)	-8.52993e-05	-0.0157941	0.0157943
gene-LOC110727351	K13416 brassinosteroid insensitive 1-associated receptor kinase 1 [EC:2.7.10.1 2.7.11.1] | (RefSeq) BRASSINOSTEROID INSENSITIVE 1-associated receptor kinase 1-like (A)	-0.00922515	0.0128193	0.0157936
gene-LOC110686971	K02888 large subunit ribosomal protein L21 | (RefSeq) 50S ribosomal protein L21, mitochondrial-like isoform X1 (A)	0.004962	0.0149933	0.0157931
gene-LOC110727372	K23544 serine incorporator 1/3 | (RefSeq) probable serine incorporator (A)	0.0142088	0.00689187	0.015792
gene-LOC110705061	K12472 epidermal growth factor receptor substrate 15 | (RefSeq) GATA zinc finger domain-containing protein 14-like (A)	0.00604737	0.0145877	0.0157915
gene-LOC110691914	K22262 WD repeat and FYVE domain-containing protein 3 | (RefSeq) protein SPIRRIG (A)	-0.00518978	0.0149141	0.0157913
gene-LOC110721210	K12135 zinc finger protein CONSTANS | (RefSeq) hypothetical protein (A)	-0.00938855	0.012695	0.0157895
gene-LOC110727232	K12135 zinc finger protein CONSTANS | (RefSeq) hypothetical protein (A)	-0.00972791	0.0124361	0.0157889
gene-LOC110705696	K13366 polyamine oxidase [EC:1.5.3.14 1.5.3.16 1.5.3.-] | (RefSeq) polyamine oxidase 1-like (A)	0.00486575	0.0150191	0.0157876
gene-LOC110691729	K20310 trafficking protein particle complex subunit 13 | (RefSeq) PsbB mRNA maturation factor Mbb1, chloroplastic (A)	0.0137895	0.00768291	0.0157854
gene-LOC110727725	K01180 endo-1,3(4)-beta-glucanase [EC:3.2.1.6] | (RefSeq) probable endo-1,3(4)-beta-glucanase ARB_01444 (A)	0.0101112	0.0121215	0.015785
gene-LOC110724975	--	-0.0070002	0.0141446	0.0157821
gene-LOC110707328	K03283 heat shock 70kDa protein 1/2/6/8 | (RefSeq) heat shock 70 kDa protein 18-like (A)	0.00921318	0.012813	0.0157815
gene-LOC110719324	K14396 polyadenylate-binding protein 2 | (RefSeq) polyadenylate-binding protein 2-like (A)	-0.00639559	0.0144198	0.0157745
gene-LOC110682859	--	0.010813	0.0114796	0.0157703
gene-LOC110686226	K20291 conserved oligomeric Golgi complex subunit 4 | (RefSeq) pentatricopeptide repeat-containing protein At4g01400, mitochondrial-like (A)	-0.00264096	0.0155431	0.0157659
gene-LOC110686215	K23677 MFS transporter, Spinster family, sphingosine-1-phosphate transporter | (RefSeq) uncharacterized LOC105802280 (A)	-0.00675392	0.0142441	0.0157642
gene-LOC110727000	K22312 hydroxyjasmonate sulfotransferase [EC:2.8.2.39] | (RefSeq) cytosolic sulfotransferase 15-like (A)	0.00802978	0.0135636	0.0157622
gene-LOC110736784	K21989 calcium permeable stress-gated cation channel | (RefSeq) CSC1-like protein RXW8 (A)	0.00315839	0.0154413	0.015761
gene-LOC110735268	--	0.0146394	0.00583404	0.0157591
gene-LOC110730576	--	-0.0109212	0.0113603	0.0157585
gene-LOC110734308	K10658 E3 ubiquitin-protein ligase MARCH3 [EC:2.3.2.27] | (RefSeq) E3 ubiquitin-protein ligase MARCH3 (A)	-0.00759892	0.0138003	0.0157541
gene-LOC110726819	K20285 Rab9 effector protein with kelch motifs | (Kazusa) Lj0g3v0120939.2; - (A)	0.00141118	0.0156896	0.0157529
gene-LOC110727873	--	0.0111922	-0.0110828	0.015751
gene-LOC110731347	K03327 multidrug resistance protein, MATE family | (RefSeq) protein DETOXIFICATION 40-like (A)	0.0111761	-0.0110908	0.0157452
gene-LOC110734293	--	-0.00372141	0.0152971	0.0157433
gene-LOC110687372	K00703 starch synthase [EC:2.4.1.21] | (RefSeq) starch synthase 3, chloroplastic/amyloplastic-like isoform X1 (A)	-0.0126172	0.00941508	0.0157428
gene-LOC110706674	K01922 phosphopantothenate---cysteine ligase (ATP) [EC:6.3.2.51] | (RefSeq) phosphopantothenate--cysteine ligase 2-like (A)	-0.00434336	0.0151306	0.0157416
gene-LOC110735051	K22128 piezo-type mechanosensitive ion channel component 1/2 | (RefSeq) hypothetical protein (A)	0.0094636	0.012576	0.015739
gene-LOC110701892	K14300 nuclear pore complex protein Nup133 | (RefSeq) nuclear pore complex protein NUP133-like isoform X1 (A)	0.00566003	0.0146839	0.015737
gene-LOC110699626	K13946 auxin influx carrier (AUX1 LAX family) | (Kazusa) Lj3g3v3475730.1; - (A)	-0.000533671	0.0157258	0.0157348
gene-LOC110697792	K11801 WD repeat-containing protein 23 | (RefSeq) LEC14B protein-like (A)	-0.010767	0.011474	0.0157347
gene-LOC110713563	K22733 magnesium transporter | (RefSeq) uncharacterized protein LOC102612526 (A)	0.00646612	0.0143431	0.0157332
gene-LOC110726530	--	-0.00799405	0.0135481	0.0157307
gene-LOC110697010	K04567 lysyl-tRNA synthetase, class II [EC:6.1.1.6] | (RefSeq) lysine--tRNA ligase-like (A)	0.00700585	0.0140813	0.0157279
gene-LOC110683865	--	0.00588724	0.0145819	0.0157255
gene-LOC110683978	--	0.00707115	0.0140456	0.0157251
gene-LOC110702742	K07466 replication factor A1 | (RefSeq) replication protein A 70 kDa DNA-binding subunit B (A)	-0.00657747	0.0142832	0.0157249
gene-LOC110705559	K21630 GATA-type zinc finger protein 1 | (RefSeq) GATA transcription factor 6-like (A)	0.0089917	-0.0128997	0.0157243
gene-LOC110712834	K01757 strictosidine synthase [EC:4.3.3.2] | (RefSeq) protein STRICTOSIDINE SYNTHASE-LIKE 12-like (A)	-0.00723252	0.0139611	0.0157233
gene-LOC110693601	K19040 E3 ubiquitin-protein ligase ATL10/75/76/77/78 [EC:2.3.2.27] | (RefSeq) RING-H2 finger protein ATL73-like (A)	-0.00905849	0.0128498	0.0157217
gene-LOC110701709	--	0.014331	0.00646474	0.0157216
gene-LOC110724788	K08241 jasmonate O-methyltransferase [EC:2.1.1.141] | (RefSeq) salicylate carboxymethyltransferase-like (A)	-0.0048139	-0.014964	0.0157193
gene-LOC110716026	--	-0.00624733	0.014422	0.015717
gene-LOC110688563	K00521 ferric-chelate reductase [EC:1.16.1.7] | (RefSeq) ferric reduction oxidase 7, chloroplastic-like (A)	0.00392648	-0.0152155	0.015714
gene-LOC110736177	--	0.0014716	0.0156425	0.0157116
gene-LOC110686593	--	0.0151074	-0.00431349	0.0157111
gene-LOC110708698	--	-0.00974225	0.0123207	0.015707
gene-LOC110701089	K18835 WRKY transcription factor 2 | (RefSeq) probable WRKY transcription factor 34 (A)	0.00603436	0.0145007	0.0157062
gene-LOC110739211	K17790 mitochondrial import inner membrane translocase subunit TIM22 | (RefSeq) outer envelope pore protein 16-4, chloroplastic (A)	-0.00464826	0.0150021	0.0157057
gene-LOC110683481	K08332 vacuolar protein 8 | (RefSeq) U-box domain-containing protein 44-like (A)	0.00217624	0.0155541	0.0157056
gene-LOC110693174	K15803 (-)-germacrene D synthase [EC:4.2.3.75] | (RefSeq) probable sesquiterpene synthase (A)	-0.0114812	0.0107166	0.0157055
gene-LOC110711009	--	-0.0135824	0.00788111	0.0157033
gene-LOC110717368	K12135 zinc finger protein CONSTANS | (RefSeq) CO; B-box type zinc finger protein with CCT domain-containing protein (A)	0.00969233	-0.0123505	0.0156996
gene-LOC110681888	--	-0.00489996	0.0149146	0.0156989
gene-LOC110712806	--	0.0087172	0.0130552	0.0156981
gene-LOC110687694	K08869 aarF domain-containing kinase | (RefSeq) uncharacterized protein LOC110687694 (A)	0.0110684	-0.0111313	0.0156976
gene-LOC110726817	--	-0.00415183	0.0151385	0.0156975
gene-LOC110711828	--	-0.0109168	0.0112779	0.0156961
gene-LOC110696657	K23541 Ca2+/H+ antiporter, TMEM165/GDT1 family | (RefSeq) pentatricopeptide repeat-containing protein At4g21065-like (A)	-0.00176765	0.0155938	0.0156937
gene-LOC110740336	K08867 WNK lysine deficient protein kinase [EC:2.7.11.1] | (RefSeq) probable serine/threonine-protein kinase WNK9 (A)	-0.00683902	-0.0141247	0.0156933
gene-LOC110717831	K02892 large subunit ribosomal protein L23 | (RefSeq) uncharacterized protein LOC110717831 (A)	-0.00207057	0.015556	0.0156932
gene-LOC110727976	K17756 long-chain-alcohol oxidase [EC:1.1.3.20] | (RefSeq) long-chain-alcohol oxidase FAO2-like (A)	-0.010475	0.0116812	0.01569
gene-LOC110733613	--	0.00565667	0.0146346	0.0156898
gene-LOC110693258	--	0.00972447	0.0123126	0.0156897
gene-LOC110713482	--	0.00467202	0.0149775	0.0156893
gene-LOC110733571	--	-0.011511	0.0106585	0.0156878
gene-LOC110696875	--	-0.00598819	-0.0144988	0.0156868
gene-LOC110694207	--	-0.010636	0.0115303	0.0156866
gene-LOC110688429	K17609 nucleoredoxin [EC:1.8.1.8] | (RefSeq) hypothetical protein (A)	-0.00857633	0.0131343	0.0156864
gene-LOC110729582	K12133 MYB-related transcription factor LHY | (RefSeq) putative At5g37260-like protein (A)	-0.00672449	0.0141695	0.0156842
gene-LOC110726452	K03860 phosphatidylinositol glycan, class Q | (RefSeq) N-acetylglucosaminyl-phosphatidylinositol biosynthetic protein gpi1-like (A)	0.000819794	0.0156617	0.0156831
gene-LOC110704611	K19791 iron transport multicopper oxidase | (RefSeq) hypothetical protein (A)	0.00987151	-0.0121774	0.0156759
gene-LOC110709833	K09264 MADS-box transcription factor, plant | (RefSeq) MADS-box transcription factor 23-like isoform X1 (A)	0.0156702	-0.000403899	0.0156754
gene-LOC110729518	K09060 plant G-box-binding factor | (RefSeq) G-box-binding factor 3-like isoform X1 (A)	0.0141561	-0.00673205	0.0156753
gene-LOC110705619	K11996 adenylyltransferase and sulfurtransferase [EC:2.7.7.80 2.8.1.11] | (RefSeq) adenylyltransferase and sulfurtransferase MOCS3-like (A)	-0.0123372	0.00966957	0.015675
gene-LOC110736475	--	-0.00369437	0.015233	0.0156746
gene-LOC110689744	K00679 phospholipid:diacylglycerol acyltransferase [EC:2.3.1.158] | (RefSeq) lecithin:cholesterol acyltransferase (A)	-0.0069021	0.0140727	0.0156742
gene-LOC110705276	K03515 DNA repair protein REV1 [EC:2.7.7.-] | (RefSeq) uncharacterized protein LOC107894697 (A)	-0.0070961	0.0139749	0.0156733
gene-LOC110690410	--	-0.00339008	0.0153003	0.0156713
gene-LOC110710498	K01760 cysteine-S-conjugate beta-lyase [EC:4.4.1.13] | (RefSeq) cystathionine beta-lyase, chloroplastic-like (A)	-0.00609485	0.0144338	0.0156679
gene-LOC110707644	--	0.00603557	-0.0144576	0.0156669
gene-LOC110720258	--	0.00138642	0.0156001	0.0156616
gene-LOC110723123	K08711 ATP-binding cassette, subfamily G (WHITE), member 2, PDR | (RefSeq) LOW QUALITY PROTEIN: ZEB2-regulated ABC transporter 1-like (A)	-0.00707477	0.0139698	0.0156591
gene-LOC110719960	K17964 leucine-rich PPR motif-containing protein, mitochondrial | (RefSeq) hypothetical protein (A)	-0.00390643	0.0151624	0.0156575
gene-LOC110692910	K12130 pseudo-response regulator 5 | (RefSeq) two-component response regulator-like APRR5 isoform X1 (A)	-0.00747452	0.013756	0.0156555
gene-LOC110707780	K17710 pentatricopeptide repeat domain-containing protein 1 | (RefSeq) pentatricopeptide repeat-containing protein At5g25630-like (A)	0.00737346	-0.0138086	0.015654
gene-LOC110713148	--	0.00959827	0.0123655	0.0156535
gene-LOC110691197	K01054 acylglycerol lipase [EC:3.1.1.23] | (RefSeq) caffeoylshikimate esterase-like (A)	0.0127549	-0.00907334	0.0156529
gene-LOC110691891	K00748 lipid-A-disaccharide synthase [EC:2.4.1.182] | (RefSeq) probable lipid-A-disaccharide synthase, mitochondrial isoform X1 (A)	0.00461601	0.0149556	0.0156518
gene-LOC110732327	K19891 glucan endo-1,3-beta-glucosidase 1/2/3 [EC:3.2.1.39] | (RefSeq) hypothetical protein (A)	-0.00162627	0.0155626	0.0156473
gene-LOC110688611	K03452 magnesium/proton exchanger | (RefSeq) uncharacterized LOC18613571 (A)	0.000706641	0.0156308	0.0156468
gene-LOC110693624	K01968 3-methylcrotonyl-CoA carboxylase alpha subunit [EC:6.4.1.4] | (RefSeq) methylcrotonoyl-CoA carboxylase subunit alpha, mitochondrial (A)	-0.0101408	0.0119129	0.0156446
gene-LOC110696039	--	0.00714916	0.0139146	0.0156438
gene-LOC110688060	K13464 jasmonate ZIM domain-containing protein | (RefSeq) protein TIFY 10A-like (A)	-0.000165598	0.0156421	0.015643
gene-LOC110733555	K07198 5'-AMP-activated protein kinase, catalytic alpha subunit [EC:2.7.11.11] | (RefSeq) CBL-interacting protein kinase 2-like (A)	0.00579824	-0.0145258	0.0156403
gene-LOC110734389	K13422 transcription factor MYC2 | (RefSeq) transcription factor MYC2-like (A)	0.0116344	0.0104458	0.0156357
gene-LOC110706259	--	0.00790352	0.0134903	0.015635
gene-LOC110715927	K22048 mechanosensitive ion channel protein 4/5/6/7/8/9/10 | (RefSeq) mechanosensitive ion channel protein 10-like (A)	-0.00967861	0.0122767	0.0156331
gene-LOC110730528	K00679 phospholipid:diacylglycerol acyltransferase [EC:2.3.1.158] | (RefSeq) hypothetical protein (A)	0.00950054	0.0124116	0.0156304
gene-LOC110728506	K22455 estrogen receptor-binding fragment-associated gene 9 protein | (RefSeq) uncharacterized protein At3g61260-like (A)	-0.00368607	0.0151891	0.0156299
gene-LOC110738705	K17710 pentatricopeptide repeat domain-containing protein 1 | (RefSeq) pentatricopeptide repeat-containing protein At2g18940, chloroplastic-like (A)	-0.00297787	0.0153409	0.0156272
gene-LOC110707938	K08070 2-alkenal reductase [EC:1.3.1.74] | (RefSeq) NADP-dependent alkenal double bond reductase P1-like (A)	0.00964176	-0.012298	0.0156271
gene-LOC110688047	--	0.00049226	0.0156166	0.0156243
gene-LOC110699040	--	0.00715889	0.0138873	0.0156239
gene-LOC110709971	K11801 WD repeat-containing protein 23 | (RefSeq) LEC14B protein-like (A)	-0.0109948	0.0110978	0.015622
gene-LOC110691275	--	0.011937	-0.0100741	0.0156198
gene-LOC110723700	K23280 rhamnogalacturonan I rhamnosyltransferase [EC:2.4.1.351] | (RefSeq) uncharacterized protein At1g04910 (A)	-0.000119231	0.015612	0.0156124
gene-LOC110685589	K17604 zinc finger SWIM domain-containing protein 3 | (RefSeq) uncharacterized LOC104456899 (A)	0.00913585	0.0126558	0.0156088
gene-LOC110705137	K22521 protein disulfide-isomerase [EC:5.3.4.1] | (RefSeq) protein disulfide-isomerase SCO2-like (A)	-0.00521269	0.0147115	0.0156077
gene-LOC110731784	--	-0.00620278	0.0143203	0.015606
gene-LOC110693727	K22756 E3 SUMO-protein ligase NSE2 [EC:2.3.2.-] | (RefSeq) E3 SUMO-protein ligase MMS21 isoform X1 (A)	0.0109686	0.011099	0.0156044
gene-LOC110693868	K15746 beta-carotene 3-hydroxylase [EC:1.14.15.24] | (RefSeq) beta-carotene hydroxylase 2, chloroplastic-like (A)	0.0132685	-0.00820636	0.0156012
gene-LOC110702947	K02563 UDP-N-acetylglucosamine--N-acetylmuramyl-(pentapeptide) pyrophosphoryl-undecaprenol N-acetylglucosamine transferase [EC:2.4.1.227] | (RefSeq) uncharacterized protein LOC110702947 (A)	-0.0112289	0.01083	0.0156005
gene-LOC110714239	K23877 xyloglucan O-acetyltransferase | (RefSeq) protein ALTERED XYLOGLUCAN 4-like (A)	-0.00389773	-0.0151035	0.0155983
gene-LOC110730844	K01897 long-chain acyl-CoA synthetase [EC:6.2.1.3] | (RefSeq) long chain acyl-CoA synthetase 8-like isoform X1 (A)	-0.00516356	0.0147185	0.015598
gene-LOC110729416	K01166 ribonuclease T2 [EC:3.1.27.1] | (RefSeq) uncharacterized protein LOC111302682 (A)	0.0104744	-0.0115563	0.0155968
gene-LOC110708738	K21989 calcium permeable stress-gated cation channel | (RefSeq) CSC1-like protein RXW8 (A)	-0.00498299	0.0147787	0.0155962
gene-LOC110713211	K13211 GC-rich sequence DNA-binding factor | (RefSeq) transcriptional repressor ILP1-like (A)	0.0110547	0.0110007	0.0155956
gene-LOC110728640	K19882 O-palmitoleoyl-L-serine hydrolase [EC:3.1.1.98] | (RefSeq) pectin acetylesterase 9-like (A)	0.00985456	0.0120821	0.0155913
gene-LOC110682254	K19791 iron transport multicopper oxidase | (RefSeq) L-ascorbate oxidase homolog (A)	0.0113909	0.0106436	0.0155898
gene-LOC110717267	--	-0.00665841	0.0140956	0.0155891
gene-LOC110704775	--	0.0153078	0.00293074	0.0155858
gene-LOC110726318	--	0.0116748	0.0103168	0.01558
gene-LOC110736726	--	-0.00682914	-0.0140032	0.0155797
gene-LOC110706591	K17506 protein phosphatase 1L [EC:3.1.3.16] | (RefSeq) probable protein phosphatase 2C 10 (A)	-0.00489471	0.0147907	0.0155796
gene-LOC110699136	K01637 isocitrate lyase [EC:4.1.3.1] | (RefSeq) isocitrate lyase (A)	0.00849905	0.0130571	0.0155795
gene-LOC110690310	K01255 leucyl aminopeptidase [EC:3.4.11.1] | (RefSeq) leucyl aminopeptidase (A)	-0.00239135	-0.0153947	0.0155793
gene-LOC110704222	--	0.00908801	0.0126535	0.015579
gene-LOC110682124	K00021 hydroxymethylglutaryl-CoA reductase (NADPH) [EC:1.1.1.34] | (RefSeq) 3-hydroxy-3-methylglutaryl-coenzyme A reductase-like (A)	0.00760624	0.0135959	0.0155789
gene-LOC110729548	K07052 uncharacterized protein | (RefSeq) uncharacterized LOC109194101 (A)	-0.00575034	-0.0144782	0.0155784
gene-LOC110733061	K15920 xylan 1,4-beta-xylosidase [EC:3.2.1.37] | (RefSeq) beta-xylosidase/alpha-L-arabinofuranosidase 2-like (A)	-0.00474436	0.0148371	0.0155772
gene-LOC110690490	--	-0.00683388	0.0139964	0.0155757
gene-LOC110737737	--	0.015019	0.00412546	0.0155753
gene-LOC110683420	K17604 zinc finger SWIM domain-containing protein 3 | (RefSeq) protein FAR-RED IMPAIRED RESPONSE 1-like (A)	0.0071657	0.0138257	0.0155724
gene-LOC110686977	K17579 protein phosphatase 1 regulatory subunit 42 | (RefSeq) hypothetical protein (A)	0.0137989	-0.00721469	0.0155712
gene-LOC110683177	--	0.0106602	0.0113499	0.0155711
gene-LOC110713551	K08869 aarF domain-containing kinase | (RefSeq) predicted protein (A)	0.0117684	-0.0101945	0.0155699
gene-LOC110719566	--	0.00353807	0.0151626	0.0155699
gene-LOC110713059	--	0.00204557	-0.0154343	0.0155693
gene-LOC110682217	K21596 calmodulin-binding transcription activator | (RefSeq) calmodulin-binding transcription activator 3-like isoform X1 (A)	-0.0100213	0.0119139	0.0155681
gene-LOC110687539	--	0.0146655	-0.00521147	0.0155639
gene-LOC110710465	--	-0.00721166	0.0137914	0.0155631
gene-LOC110721976	--	0.0155105	-0.00127553	0.0155628
gene-LOC110714897	K16675 palmitoyltransferase ZDHHC9/14/18 [EC:2.3.1.225] | (RefSeq) probable protein S-acyltransferase 3 isoform X1 (A)	-0.00582116	0.014433	0.0155627
gene-LOC110733370	K13493 cytokinin-N-glucosyltransferase [EC:2.4.1.-] | (RefSeq) hypothetical protein (A)	-0.0120861	0.0098013	0.0155608
gene-LOC110735184	--	-0.00859103	0.0129742	0.0155607
gene-LOC110696565	K15891 NAD+-dependent farnesol dehydrogenase [EC:1.1.1.354] | (RefSeq) uncharacterized protein LOC110696565 (A)	-0.00896028	0.0127178	0.0155573
gene-LOC110737683	--	0.00464214	0.0148456	0.0155544
gene-LOC110695121	--	-0.00686684	0.0139564	0.0155543
gene-LOC110721815	--	0.0132229	-0.0081902	0.0155539
gene-LOC110708544	K15503 serine/threonine-protein phosphatase 6 regulatory ankyrin repeat subunit B | (RefSeq) uncharacterized LOC104891722 (A)	-0.012838	-0.00877774	0.0155519
gene-LOC110685041	K13422 transcription factor MYC2 | (RefSeq) transcription factor MYC4-like (A)	-0.00517835	0.0146639	0.0155514
gene-LOC110699939	--	0.0129723	0.00857215	0.0155487
gene-LOC110727172	--	0.0138484	0.00706796	0.0155478
gene-LOC110737777	--	-0.0111728	0.0108115	0.0155473
gene-LOC110702366	K16252 DNA-directed RNA polymerase IV and V subunit 2 [EC:2.7.7.6] | (RefSeq) DNA-directed RNA polymerases IV and V subunit 2 (A)	-0.00257021	0.0153314	0.0155454
gene-LOC110732333	K01507 inorganic pyrophosphatase [EC:3.6.1.1] | (RefSeq) soluble inorganic pyrophosphatase 1-like (A)	0.00637957	0.0141757	0.015545
gene-LOC110718378	K15078 structure-specific endonuclease subunit SLX1 [EC:3.6.1.-] | (RefSeq) putative disease resistance protein RGA1 (A)	0.00770481	0.0135004	0.0155443
gene-LOC110702972	K01369 legumain [EC:3.4.22.34] | (RefSeq) vacuolar-processing enzyme-like isoform X1 (A)	0.0100502	0.011847	0.0155357
gene-LOC110689228	K18453 ADP-ribose/FAD diphosphatase [EC:3.6.1.13 3.6.1.18] | (RefSeq) nudix hydrolase 23, chloroplastic-like (A)	-0.0104807	0.0114648	0.0155334
gene-LOC110734474	K03652 DNA-3-methyladenine glycosylase [EC:3.2.2.21] | (RefSeq) DNA-3-methyladenine glycosylase-like (A)	-0.000352732	0.0155294	0.0155334
gene-LOC110694422	--	-0.00782718	0.0134144	0.015531
gene-LOC110681741	K10738 DNA helicase MCM9 [EC:3.6.4.12] | (RefSeq) probable DNA helicase MCM9 (A)	0.0140901	0.00653276	0.0155308
gene-LOC110689219	K20224 importin-9 | (RefSeq) Importin-9 (A)	0.0140577	-0.00660185	0.0155307
gene-LOC110736114	--	-0.0083605	0.0130871	0.0155296
gene-LOC110688418	--	-0.00134985	0.0154674	0.0155262
gene-LOC110719547	K22378 E3 ubiquitin-protein ligase RNF181 [EC:2.3.2.27] | (RefSeq) RING-H2 finger protein ATL73-like (A)	-0.00640428	0.0141403	0.0155229
gene-LOC110725446	--	-0.0081551	0.0132079	0.0155227
gene-LOC110706692	--	-0.00945497	0.0123093	0.0155215
gene-LOC110701035	K12373 hexosaminidase [EC:3.2.1.52] | (RefSeq) beta-hexosaminidase 3-like (A)	-0.00653095	0.0140735	0.015515
gene-LOC110697801	K14400 pre-mRNA cleavage complex 2 protein Pcf11 | (RefSeq) LOW QUALITY PROTEIN: uncharacterized protein LOC109844760 (A)	0.00825321	0.0131377	0.015515
gene-LOC110736344	K03505 DNA polymerase delta subunit 4 | (RefSeq) uncharacterized protein LOC110736344 (A)	0.00583188	0.0143764	0.0155143
gene-LOC110690886	--	-0.00423355	0.0149252	0.015514
gene-LOC110691574	K03553 recombination protein RecA | (RefSeq) DNA repair protein recA homolog 3, mitochondrial-like (A)	0.00460537	0.014812	0.0155115
gene-LOC110686855	K15255 ATP-dependent DNA helicase PIF1 [EC:3.6.4.12] | (RefSeq) uncharacterized protein LOC101786894 (A)	0.00172024	-0.0154146	0.0155103
gene-LOC110736340	--	-0.00466423	0.014792	0.01551
gene-LOC110736555	K03452 magnesium/proton exchanger | (RefSeq) uncharacterized LOC18613571 (A)	0.00137538	0.0154485	0.0155096
gene-LOC110711764	K15535 phosphoglucan, water dikinase [EC:2.7.9.5] | (RefSeq) phosphoglucan, water dikinase, chloroplastic-like isoform X1 (A)	-0.0124362	0.00926561	0.0155084
gene-LOC110734865	--	0.0154523	-0.0012374	0.0155018
gene-LOC110710275	K15121 solute carrier family 25, member 44 | (RefSeq) solute carrier family 25 member 44-like (A)	-0.00938784	0.0123341	0.0155003
gene-LOC110711163	K06180 23S rRNA pseudouridine1911/1915/1917 synthase [EC:5.4.99.23] | (RefSeq) pentatricopeptide repeat-containing protein At1g20230 isoform X1 (A)	-9.96987e-05	0.0154991	0.0154995
gene-LOC110714993	K18643 katanin p80 WD40 repeat-containing subunit B1 | (RefSeq) katanin p80 WD40 repeat-containing subunit B1 homolog (A)	-0.00983823	0.0119759	0.0154988
gene-LOC110718697	--	0.0121575	-0.00961168	0.0154981
gene-LOC110719842	K12309 beta-galactosidase [EC:3.2.1.23] | (RefSeq) beta-galactosidase 2 (A)	-0.0107819	0.011131	0.0154967
gene-LOC110682984	--	0.0131473	-0.00820313	0.0154966
gene-LOC110717170	K03860 phosphatidylinositol glycan, class Q | (RefSeq) N-acetylglucosaminyl-phosphatidylinositol biosynthetic protein gpi1-like (A)	-0.00290335	0.0152209	0.0154954
gene-LOC110726895	--	0.0142967	-0.00597108	0.0154935
gene-LOC110689835	K11096 small nuclear ribonucleoprotein D2 | (RefSeq) small nuclear ribonucleoprotein Sm D2-like (A)	0.0151315	0.00332716	0.015493
gene-LOC110733020	K14709 solute carrier family 39 (zinc transporter), member 1/2/3 | (RefSeq) zinc transporter 6, chloroplastic-like (A)	0.0111341	-0.0107726	0.0154924
gene-LOC110713463	--	-0.00848246	0.0129597	0.0154889
gene-LOC110686110	--	0.0132521	-0.00800721	0.0154833
gene-LOC110717414	K01858 myo-inositol-1-phosphate synthase [EC:5.5.1.4] | (RefSeq) inositol-3-phosphate synthase (A)	0.00743448	-0.0135772	0.0154794
gene-LOC110691475	K22455 estrogen receptor-binding fragment-associated gene 9 protein | (RefSeq) uncharacterized protein At3g61260-like (A)	0.00728093	-0.0136587	0.0154781
gene-LOC110713891	K23809 cytochrome P450 family 72 subfamily A polypeptide 68 | (GenBank) cytochrome P450 family 72 protein (A)	-0.00766515	-0.0134463	0.0154777
gene-LOC110707201	--	0.0131759	0.0081152	0.0154745
gene-LOC110714650	K19996 phosphatidylinositol transfer protein SFH5 | (RefSeq) patellin-3 (A)	0.000179032	0.0154728	0.0154739
gene-LOC110714128	K10896 fanconi anemia group M protein | (RefSeq) DEAD-box ATP-dependent RNA helicase FANCM-like isoform X1 (A)	0.00746919	0.0135505	0.0154727
gene-LOC110734753	--	0.0116411	-0.0101905	0.0154713
gene-LOC110728852	K06883 uncharacterized protein | (RefSeq) LOW QUALITY PROTEIN: uncharacterized protein LOC104799061 (A)	-0.0111577	0.0107157	0.01547
gene-LOC110722042	K07198 5'-AMP-activated protein kinase, catalytic alpha subunit [EC:2.7.11.11] | (RefSeq) CBL-interacting serine/threonine-protein kinase 1-like (A)	0.00549324	-0.0144567	0.0154652
gene-LOC110697753	--	0.0115863	0.0102385	0.0154619
gene-LOC110690729	K04688 ribosomal protein S6 kinase beta [EC:2.7.11.1] | (RefSeq) serine/threonine-protein kinase AtPK1/AtPK6-like (A)	0.0059554	-0.0142688	0.0154618
gene-LOC110688078	K00454 lipoxygenase [EC:1.13.11.12] | (RefSeq) linoleate 13S-lipoxygenase 3-1, chloroplastic-like (A)	-0.00426215	0.0148626	0.0154617
gene-LOC110737967	K17604 zinc finger SWIM domain-containing protein 3 | (RAP-DB) Os01g0852650; FAR1 DNA binding domain domain containing protein. (A)	0.012929	0.00847745	0.0154605
gene-LOC110687236	K20606 mitogen-activated protein kinase kinase kinase ANP1 [EC:2.7.11.25] | (RefSeq) receptor-like serine/threonine-protein kinase SD1-7 isoform X1 (A)	-0.0132558	0.00795639	0.0154603
gene-LOC110699273	K15271 ATP-dependent DNA helicase HFM1/MER3 [EC:3.6.4.12] | (RefSeq) DExH-box ATP-dependent RNA helicase DExH17-like (A)	-0.0102973	0.0115262	0.015456
gene-LOC110733220	K09489 heat shock 70kDa protein 4 | (RefSeq) heat shock 70 kDa protein 15-like (A)	0.00346819	-0.0150611	0.0154553
gene-LOC110724958	K11294 nucleolin | (RefSeq) RNA-binding protein CP29B, chloroplastic-like (A)	-0.0048769	0.0146623	0.0154521
gene-LOC110686636	K04728 serine-protein kinase ATM [EC:2.7.11.1] | (RefSeq) serine/threonine-protein kinase ATM-like isoform X1 (A)	0.00258056	0.0152332	0.0154502
gene-LOC110689156	K19038 E3 ubiquitin-protein ligase ATL41 [EC:2.3.2.27] | (RefSeq) E3 ubiquitin-protein ligase ATL41-like (A)	-0.00634368	0.0140858	0.0154483
gene-LOC110720606	K13449 pathogenesis-related protein 1 | (RefSeq) pathogenesis-related protein 1-like (A)	0.0108396	-0.0110062	0.0154478
gene-LOC110716625	K13348 protein Mpv17 | (RefSeq) protein sym-1-like (A)	0.00192215	-0.0153267	0.0154468
gene-LOC110727091	K22450 aralkylamine N-acetyltransferase [EC:2.3.1.87] | (RefSeq) putative acetyltransferase NSI (A)	0.0100419	-0.0117355	0.0154455
gene-LOC110695493	K02258 cytochrome c oxidase assembly protein subunit 11 | (RefSeq) cytochrome c oxidase assembly protein COX11, mitochondrial-like isoform X1 (A)	-0.00273091	0.0152013	0.0154447
gene-LOC110736505	K13416 brassinosteroid insensitive 1-associated receptor kinase 1 [EC:2.7.10.1 2.7.11.1] | (RefSeq) BRASSINOSTEROID INSENSITIVE 1-associated receptor kinase 1-like (A)	-0.0101061	0.0116667	0.0154352
gene-LOC110736224	K08064 nuclear transcription factor Y, alpha | (RefSeq) nuclear transcription factor Y subunit A-1-like isoform X1 (A)	0.0121674	-0.00949693	0.0154349
gene-LOC110729895	K00850 6-phosphofructokinase 1 [EC:2.7.1.11] | (RefSeq) ATP-dependent 6-phosphofructokinase 3-like (A)	-0.0115886	0.0101922	0.015433
gene-LOC110689916	--	-0.00350361	0.0150288	0.0154318
gene-LOC110723788	K15078 structure-specific endonuclease subunit SLX1 [EC:3.6.1.-] | (RefSeq) putative disease resistance protein RGA3 (A)	-0.00770068	0.0133728	0.0154315
gene-LOC110705080	--	0.0154278	0.000205203	0.0154292
gene-LOC110687041	--	0.0130645	0.00820746	0.0154287
gene-LOC110690222	K13420 LRR receptor-like serine/threonine-protein kinase FLS2 [EC:2.7.11.1] | (RefSeq) LRR receptor-like serine/threonine-protein kinase FLS2 (A)	-0.00818976	0.0130727	0.0154262
gene-LOC110711706	K16675 palmitoyltransferase ZDHHC9/14/18 [EC:2.3.1.225] | (RefSeq) probable protein S-acyltransferase 3 (A)	0.00310653	0.0151033	0.0154195
gene-LOC110724676	K09122 uncharacterized protein | (RefSeq) uncharacterized protein LOC8057957 (A)	0.01001	-0.0117276	0.0154188
gene-LOC110683555	K09503 DnaJ homolog subfamily A member 2 | (RefSeq) dnaJ protein homolog ANJ1-like (A)	0.00852595	-0.0128469	0.0154187
gene-LOC110714364	K13422 transcription factor MYC2 | (RefSeq) transcription factor MYC2 (A)	0.00301015	-0.01512	0.0154167
gene-LOC110694828	--	0.0108095	0.0109875	0.0154133
gene-LOC110692269	K01535 H+-transporting ATPase [EC:7.1.2.1] | (RefSeq) plasma membrane ATPase 4-like isoform X1 (A)	-0.00997192	0.011752	0.0154126
gene-LOC110714085	K10683 BRCA1-associated RING domain protein 1 | (RefSeq) hypothetical protein (A)	0.00240234	0.015224	0.0154124
gene-LOC110715259	--	0.00514754	0.0145274	0.0154124
gene-LOC110715831	K15588 histone-lysine N-methyltransferase NSD1 [EC:2.1.1.43] | (RefSeq) hypothetical protein (A)	0.00815347	0.0130749	0.0154088
gene-LOC110737878	K03453 bile acid:Na+ symporter, BASS family | (RefSeq) probable sodium/metabolite cotransporter BASS1, chloroplastic (A)	0.00850159	0.0128505	0.0154082
gene-LOC110715725	--	-0.00789543	0.0132267	0.015404
gene-LOC110684170	K12127 pseudo-response regulator 1 | (RefSeq) two-component response regulator-like APRR1 (A)	-0.00890905	0.0125605	0.0153992
gene-LOC110717482	K17964 leucine-rich PPR motif-containing protein, mitochondrial | (RefSeq) hypothetical protein (A)	-0.00603069	0.0141676	0.0153977
gene-LOC110723687	--	0.0103742	0.0113776	0.0153972
gene-LOC110715585	K11843 ubiquitin carboxyl-terminal hydrolase 14 [EC:3.4.19.12] | (RefSeq) FBD-associated F-box protein At4g10400-like (A)	-0.0107587	-0.0110138	0.0153965
gene-LOC110731977	K01915 glutamine synthetase [EC:6.3.1.2] | (RefSeq) glutamine synthetase cytosolic isozyme 1-1-like (A)	0.00692902	0.0137488	0.0153961
gene-LOC110697816	K18757 la-related protein 1 | (RefSeq) la-related protein 1A-like (A)	0.0103543	0.0113936	0.0153957
gene-LOC110734547	K12173 BRCA1-A complex subunit BRE | (RefSeq) BRCA1-A complex subunit BRE-like (A)	0.0143356	-0.00561107	0.0153946
gene-LOC110681673	K01626 3-deoxy-7-phosphoheptulonate synthase [EC:2.5.1.54] | (RefSeq) phospho-2-dehydro-3-deoxyheptonate aldolase 2, chloroplastic-like (A)	-0.00851326	-0.0128226	0.0153914
gene-LOC110690351	--	0.0148461	0.00404983	0.0153886
gene-LOC110725156	K05391 cyclic nucleotide gated channel, plant | (RefSeq) cyclic nucleotide-gated ion channel 1-like (A)	-0.0070702	0.0136668	0.0153873
gene-LOC110720983	K20417 palmitoyl-[glycerolipid] 3-(E)-desaturase [EC:1.14.19.43] | (RefSeq) fatty acid desaturase 4, chloroplastic-like (A)	0.00484918	-0.0146033	0.0153873
gene-LOC110711270	K18835 WRKY transcription factor 2 | (RefSeq) probable WRKY transcription factor 2 (A)	-0.00180957	0.0152798	0.0153866
gene-LOC110731201	K00924 kinase [EC:2.7.1.-] | (RefSeq) probable serine/threonine-protein kinase PBL19 (A)	-0.0067408	0.013825	0.0153808
gene-LOC110721961	--	0.00637234	0.0139962	0.0153785
gene-LOC110710174	K21396 ATP-binding cassette, subfamily G (WHITE), eye pigment precursor transporter | (RefSeq) ABC transporter, ATP-binding protein (A)	-0.00993328	0.0117384	0.0153773
gene-LOC110722429	K18342 OTU domain-containing protein 6 [EC:3.4.19.12] | (RefSeq) OTU domain-containing protein At3g57810-like isoform X1 (A)	-0.00988496	0.0117757	0.0153747
gene-LOC110729764	K23882 CDGSH iron-sulfur domain-containing protein 2 | (RefSeq) CDGSH iron-sulfur domain-containing protein NEET-like (A)	0.0109632	-0.010772	0.0153697
gene-LOC110732784	K22809 inositol phosphorylceramide glucuronosyltransferase 1 [EC:2.4.1.-] | (RefSeq) inositol phosphorylceramide glucuronosyltransferase 1-like (A)	-0.00882027	0.0125855	0.0153686
gene-LOC110713038	K13065 shikimate O-hydroxycinnamoyltransferase [EC:2.3.1.133] | (RefSeq) anthranilate N-benzoyltransferase protein 2-like (A)	-0.00121395	-0.0153189	0.0153669
gene-LOC110725161	K17679 ATP-dependent RNA helicase MSS116, mitochondrial [EC:3.6.4.13] | (RefSeq) hypothetical protein (A)	0.00170923	0.0152709	0.0153662
gene-LOC110711110	K15362 fanconi anemia group J protein [EC:3.6.4.12] | (RefSeq) Fanconi anemia group J protein homolog isoform X1 (A)	0.0119116	0.00970033	0.0153617
gene-LOC110724240	K03686 molecular chaperone DnaJ | (RefSeq) uncharacterized protein LOC109218238 (A)	0.0118414	0.00978416	0.0153606
gene-LOC110700601	K23541 Ca2+/H+ antiporter, TMEM165/GDT1 family | (RefSeq) pentatricopeptide repeat-containing protein At4g21065-like (A)	0.000106065	0.0153601	0.0153605
gene-LOC110709800	--	0.0146122	0.00472993	0.0153586
gene-LOC110688146	K18729 protein angel | (RefSeq) calcium-binding EF hand family protein (A)	0.00883753	-0.0125588	0.0153566
gene-LOC110732744	--	0.00562499	0.0142889	0.0153563
gene-LOC110712559	K14398 cleavage and polyadenylation specificity factor subunit 6/7 | (RefSeq) cleavage and polyadenylation specificity factor subunit 6-like (A)	-0.0116088	0.0100505	0.015355
gene-LOC110713667	K12116 flavin-binding kelch repeat F-box protein 1 | (RefSeq) adagio protein 3-like (A)	-0.00864154	0.012689	0.0153521
gene-LOC110720980	--	-0.00152424	0.0152644	0.0153403
gene-LOC110716373	K13146 integrator complex subunit 9 | (RefSeq) integrator complex subunit 9-like (A)	-0.000343162	0.0153361	0.0153399
gene-LOC110703158	--	-0.00595321	-0.0141358	0.0153382
gene-LOC110713396	--	-0.000152466	0.0153369	0.0153377
gene-LOC110726712	--	0.00135639	0.0152721	0.0153322
gene-LOC110700941	--	0.00586611	0.0141639	0.0153306
gene-LOC110684354	K14572 midasin | (RefSeq) midasin-like (A)	-0.00133325	0.0152715	0.0153296
gene-LOC110694689	--	0.00323622	0.0149835	0.015329
gene-LOC110714762	K01251 adenosylhomocysteinase [EC:3.3.1.1] | (RefSeq) adenosylhomocysteinase (A)	0.000145368	-0.0153281	0.0153288
gene-LOC110683095	K13066 caffeic acid 3-O-methyltransferase [EC:2.1.1.68] | (RefSeq) COMT1-2; caffeic acid O-methyltransferase (A)	-0.0116638	0.00994568	0.0153284
gene-LOC110693152	K15803 (-)-germacrene D synthase [EC:4.2.3.75] | (RefSeq) sesquiterpene synthase-like (A)	-0.0110083	0.0106659	0.0153279
gene-LOC110712871	K22809 inositol phosphorylceramide glucuronosyltransferase 1 [EC:2.4.1.-] | (RefSeq) hypothetical protein (A)	-0.00554823	0.0142768	0.015317
gene-LOC110714534	--	0.0100252	0.0115776	0.0153149
gene-LOC110701287	--	0.00838202	0.0128159	0.0153136
gene-LOC110731281	--	0.00604734	0.0140675	0.0153122
gene-LOC110682126	--	-0.00170718	0.0152126	0.0153081
gene-LOC110735110	--	-0.00733334	0.0134358	0.0153068
gene-LOC110699381	K00430 peroxidase [EC:1.11.1.7] | (RefSeq) peroxidase P7-like (A)	-0.00535301	0.0143398	0.0153064
gene-LOC110736994	K20283 golgin subfamily A member 4 | (RefSeq) early endosome antigen 1-like (A)	-0.000907043	0.0152777	0.0153046
gene-LOC110693797	--	0.00523963	0.0143792	0.0153041
gene-LOC110714921	K01181 endo-1,4-beta-xylanase [EC:3.2.1.8] | (RefSeq) probable endo-1,4-beta-xylanase C (A)	0.00873229	0.0125677	0.0153036
gene-LOC110734501	--	0.0146521	-0.00440561	0.0153001
gene-LOC110703716	--	-0.0118521	-0.00967515	0.0152997
gene-LOC110719354	--	0.00973045	0.0118056	0.0152988
gene-LOC110699295	K03348 anaphase-promoting complex subunit 1 | (RefSeq) anaphase-promoting complex subunit 1-like isoform X1 (A)	0.0051894	0.0143899	0.015297
gene-LOC110687148	K17964 leucine-rich PPR motif-containing protein, mitochondrial | (RefSeq) hypothetical protein (A)	0.000502728	0.0152875	0.0152958
gene-LOC110736471	K06965 protein pelota | (RefSeq) protein PELOTA 1-like (A)	-0.0113534	0.0102472	0.015294
gene-LOC110728671	K01051 pectinesterase [EC:3.1.1.11] | (RefSeq) pectinesterase-like (A)	0.013197	0.00772872	0.0152936
gene-LOC110706889	--	-0.00921254	0.0122056	0.0152921
gene-LOC110737733	--	0.00585316	0.0141272	0.0152917
gene-LOC110739542	K15083 DNA repair protein RAD16 | (RefSeq) DNA repair protein RAD16-like (A)	0.00430027	0.0146742	0.0152913
gene-LOC110708979	--	0.00838227	0.0127865	0.0152891
gene-LOC110700455	K15030 translation initiation factor 3 subunit M | (RefSeq) uncharacterized protein LOC106426879 isoform X2 (A)	7.60127e-05	0.0152869	0.0152871
gene-LOC110726157	--	0.0147609	0.00397337	0.0152863
gene-LOC110707823	K03593 ATP-binding protein involved in chromosome partitioning | (RefSeq) hypothetical protein (A)	-0.00906052	-0.0123031	0.0152794
gene-LOC110683407	K13430 serine/threonine-protein kinase PBS1 [EC:2.7.11.1] | (RefSeq) serine/threonine-protein kinase PBL27-like isoform X1 (A)	-0.00817425	0.0129051	0.0152762
gene-LOC110694688	--	0.0150521	-0.00260257	0.0152755
gene-LOC110718562	K15271 ATP-dependent DNA helicase HFM1/MER3 [EC:3.6.4.12] | (RefSeq) DExH-box ATP-dependent RNA helicase DExH17 (A)	0.00119522	0.0152286	0.0152754
gene-LOC110720329	--	-0.011747	0.00975988	0.0152724
gene-LOC110700560	K23541 Ca2+/H+ antiporter, TMEM165/GDT1 family | (RefSeq) pentatricopeptide repeat-containing protein At2g03880, mitochondrial (A)	0.0105567	0.0110324	0.0152695
gene-LOC110692699	K15271 ATP-dependent DNA helicase HFM1/MER3 [EC:3.6.4.12] | (RefSeq) LOW QUALITY PROTEIN: uncharacterized protein LOC104120869 (A)	0.00160695	0.0151822	0.015267
gene-LOC110720757	K20855 beta-1,3-galactosyltransferase 1/2/3/4/5/7/8 [EC:2.4.1.-] | (RefSeq) probable beta-1,3-galactosyltransferase 4 isoform X1 (A)	0.0128969	-0.00816583	0.0152647
gene-LOC110731341	--	0.000329158	0.0152602	0.0152637
gene-LOC110720393	K01809 mannose-6-phosphate isomerase [EC:5.3.1.8] | (RefSeq) mannose-6-phosphate isomerase 2-like (A)	0.00813094	-0.0129173	0.0152633
gene-LOC110703295	K11251 histone H2A | (RefSeq) probable histone H2A variant 3 (A)	0.0102629	0.011297	0.0152627
gene-LOC110708529	--	0.00100862	0.0152285	0.0152619
gene-LOC110716258	K15601 lysine-specific demethylase 3 [EC:1.14.11.-] | (RefSeq) lysine-specific demethylase JMJ25-like (A)	0.00302871	0.0149564	0.01526
gene-LOC110711950	K05359 arogenate/prephenate dehydratase [EC:4.2.1.91 4.2.1.51] | (RefSeq) arogenate dehydratase/prephenate dehydratase 2, chloroplastic-like (A)	0.0102757	0.0112771	0.0152566
gene-LOC110692218	--	0.00962288	0.0118388	0.0152564
gene-LOC110685380	--	0.0124188	0.00886115	0.0152561
gene-LOC110713618	--	-0.00758927	-0.0132329	0.0152547
gene-LOC110728530	K14165 atypical dual specificity phosphatase [EC:3.1.3.16 3.1.3.48] | (RefSeq) similar to dual-specificity phosphatase laforin (A)	-0.00999377	0.011525	0.0152545
gene-LOC110688336	K07375 tubulin beta | (RefSeq) tubulin beta-2 chain-like (A)	-0.00210203	0.0151059	0.0152514
gene-LOC110722721	K20923 mixed-linked glucan synthase [EC:2.4.1.-] | (RAP-DB) Os10g0343400; Cellulose synthase family protein. (A)	-0.0113241	0.0102128	0.0152492
gene-LOC110722653	K16240 protein suppressor of PHYA-105 1 | (RefSeq) protein SPA1-RELATED 2-like isoform X1 (A)	0.00743896	-0.0133081	0.0152461
gene-LOC110737873	K15382 solute carrier family 50 (sugar transporter) | (RefSeq) bidirectional sugar transporter SWEET2-like isoform X1 (A)	-0.010566	0.0109898	0.0152452
gene-LOC110727640	--	0.0132557	0.00753003	0.0152451
gene-LOC110728105	--	0.0133887	-0.00729077	0.0152451
gene-LOC110736915	K06085 synovial sarcoma, X breakpoint 2 interacting protein | (RefSeq) afadin- and alpha-actinin-binding protein-like isoform X1 (A)	0.0150745	-0.00227114	0.0152447
gene-LOC110728970	K22262 WD repeat and FYVE domain-containing protein 3 | (RefSeq) protein SPIRRIG (A)	0.00314294	0.014917	0.0152445
gene-LOC110728553	K04507 calcyclin binding protein | (RefSeq) calcyclin-binding protein-like (A)	0.014434	-0.00490423	0.0152444
gene-LOC110718113	K08794 calcium/calmodulin-dependent protein kinase I [EC:2.7.11.17] | (RefSeq) phosphoenolpyruvate carboxylase kinase 1 (A)	0.0123167	0.00897764	0.0152414
gene-LOC110696870	--	-0.00671814	-0.0136807	0.0152412
gene-LOC110735480	K23260 scopoletin glucosyltransferase [EC:2.4.1.128] | (RefSeq) flavonoid glucosyltransferase (A)	0.0145438	-0.00455172	0.0152395
gene-LOC110732394	K07874 Ras-related protein Rab-1A | (RefSeq) ras-related protein RABD2c-like (A)	0.00781468	-0.0130813	0.0152378
gene-LOC110700411	K10881 26 proteasome complex subunit DSS1 | (RefSeq) protein DELETION OF SUV3 SUPPRESSOR 1(I)-like (A)	0.00586852	0.0140623	0.0152377
gene-LOC110703402	K14857 AdoMet-dependent rRNA methyltransferase SPB1 [EC:2.1.1.-] | (RefSeq) putative rRNA methyltransferase (A)	0.0148058	0.00359653	0.0152364
gene-LOC110692814	K17964 leucine-rich PPR motif-containing protein, mitochondrial | (RefSeq) hypothetical protein (A)	0.00169925	0.0151389	0.015234
gene-LOC110716735	K14964 Set1/Ash2 histone methyltransferase complex subunit ASH2 | (RefSeq) hypothetical protein (A)	-0.00750765	0.0132551	0.0152336
gene-LOC110714468	K14191 18S rRNA (adenine1779-N6/adenine1780-N6)-dimethyltransferase [EC:2.1.1.183] | (RefSeq) ribosomal RNA small subunit methyltransferase (A)	-0.00114618	0.0151893	0.0152324
gene-LOC110739704	--	-0.005786	0.014089	0.0152308
gene-LOC110727474	K15443 tRNA (guanine-N(7)-)-methyltransferase subunit TRM82 | (RefSeq) tRNA (guanine-N(7)-)-methyltransferase non-catalytic subunit wdr4-like (A)	0.0115147	0.00996917	0.0152306
gene-LOC110699660	--	0.01345	0.00713929	0.0152274
gene-LOC110719293	--	-0.00628726	0.0138661	0.0152249
gene-LOC110691186	K17086 transmembrane 9 superfamily member 2/4 | (RefSeq) uncharacterized LOC101300290 (A)	0.0116354	0.00981894	0.0152248
gene-LOC110686989	K02111 F-type H+/Na+-transporting ATPase subunit alpha [EC:7.1.2.2 7.2.2.1] | (RefSeq) LOW QUALITY PROTEIN: uncharacterized protein LOC114822316 (A)	0.0145832	0.00436604	0.0152228
gene-LOC110694423	--	-0.00364194	0.0147798	0.0152219
gene-LOC110697256	K13800 UMP-CMP kinase [EC:2.7.4.14] | (RefSeq) pentatricopeptide repeat-containing protein At4g25270, chloroplastic-like (A)	-0.00386691	0.0147225	0.0152218
gene-LOC110709454	K09597 signal peptide peptidase-like 2B [EC:3.4.23.-] | (RefSeq) signal peptide peptidase-like 5 (A)	-0.0114116	0.0100731	0.0152214
gene-LOC110694135	K00128 aldehyde dehydrogenase (NAD+) [EC:1.2.1.3] | (RefSeq) aldehyde dehydrogenase family 2 member B7, mitochondrial-like isoform X1 (A)	0.00072254	0.0152024	0.0152196
gene-LOC110687735	--	0.00817962	0.0128333	0.0152184
gene-LOC110735213	K13024 inositol-hexakisphosphate/diphosphoinositol-pentakisphosphate 1-kinase [EC:2.7.4.24] | (RefSeq) inositol hexakisphosphate and diphosphoinositol-pentakisphosphate kinase VIP2-like isoform X1 (A)	-0.00952512	0.0118653	0.0152155
gene-LOC110725775	K01426 amidase [EC:3.5.1.4] | (RefSeq) LOW QUALITY PROTEIN: uncharacterized protein LOC105643773 (A)	0.00347712	0.0148117	0.0152144
gene-LOC110701414	K09667 protein O-GlcNAc transferase [EC:2.4.1.255] | (RefSeq) probable UDP-N-acetylglucosamine--peptide N-acetylglucosaminyltransferase SEC isoform X1 (A)	0.00252018	-0.0150033	0.0152135
gene-LOC110718593	K23541 Ca2+/H+ antiporter, TMEM165/GDT1 family | (RefSeq) pentatricopeptide repeat-containing protein At3g24000, mitochondrial-like (A)	-0.00332977	0.0148442	0.0152131
gene-LOC110740100	K00485 dimethylaniline monooxygenase (N-oxide forming) [EC:1.14.13.8] | (RefSeq) probable flavin-containing monooxygenase 1 (A)	0.0133636	0.00726546	0.015211
gene-LOC110700478	K01206 alpha-L-fucosidase [EC:3.2.1.51] | (RefSeq) alpha-L-fucosidase 3 (A)	0.00869629	0.0124798	0.0152109
gene-LOC110716799	K00588 caffeoyl-CoA O-methyltransferase [EC:2.1.1.104] | (RefSeq) caffeoyl-CoA O-methyltransferase-like (A)	0.011829	-0.0095608	0.0152097
gene-LOC110681836	K07198 5'-AMP-activated protein kinase, catalytic alpha subunit [EC:2.7.11.11] | (RefSeq) CBL-interacting protein kinase 2-like (A)	0.0130945	-0.00773676	0.0152093
gene-LOC110700635	K17710 pentatricopeptide repeat domain-containing protein 1 | (RefSeq) hypothetical protein (A)	-0.000858645	0.0151846	0.0152088
gene-LOC110687158	K06883 uncharacterized protein | (RefSeq) LOW QUALITY PROTEIN: uncharacterized protein LOC104799061 (A)	-0.00124615	0.0151568	0.0152079
gene-LOC110726355	K05280 flavonoid 3'-monooxygenase [EC:1.14.14.82] | (RefSeq) flavonoid 3'-monooxygenase-like (A)	-0.00515801	-0.0143059	0.0152073
gene-LOC110719713	K17479 glutaredoxin domain-containing cysteine-rich protein 1 | (RefSeq) uncharacterized protein At3g28850-like (A)	0.00785043	-0.0130224	0.0152057
gene-LOC110681798	--	0.0134747	0.00704564	0.0152055
gene-LOC110707063	K00876 uridine kinase [EC:2.7.1.48] | (RefSeq) uridine kinase-like protein 3 isoform X1 (A)	-0.00991312	0.0115276	0.0152038
gene-LOC110706329	--	0.0117607	-0.00962987	0.0152003
gene-LOC110717179	K19891 glucan endo-1,3-beta-glucosidase 1/2/3 [EC:3.2.1.39] | (RefSeq) glucan endo-1,3-beta-glucosidase 3-like (A)	-0.0111186	0.0103626	0.0151989
gene-LOC110737104	K01456 peptide-N4-(N-acetyl-beta-glucosaminyl)asparagine amidase [EC:3.5.1.52] | (RefSeq) peptide-N(4)-(N-acetyl-beta- glucosaminyl)asparagine amidase isoform X1 (A)	-0.00858467	0.012541	0.0151978
gene-LOC110686376	K22522 cytokinin riboside 5'-monophosphate phosphoribohydrolase [EC:3.2.2.-] | (RefSeq) probable cytokinin riboside 5'-monophosphate phosphoribohydrolase LOGL10 isoform X1 (A)	-0.00341724	-0.0148066	0.0151959
gene-LOC110708531	K04565 superoxide dismutase, Cu-Zn family [EC:1.15.1.1] | (RefSeq) superoxide dismutase [Cu-Zn]-like (A)	0.00875739	-0.0124165	0.0151941
gene-LOC110683191	--	0.000399804	-0.0151888	0.0151941
gene-LOC110702782	K17710 pentatricopeptide repeat domain-containing protein 1 | (RefSeq) pentatricopeptide repeat-containing protein At2g18940, chloroplastic-like (A)	-0.00868032	0.0124703	0.0151939
gene-LOC110720003	K06228 fused [EC:2.7.11.1] | (RefSeq) serine/threonine-protein kinase TIO (A)	0.0138839	0.00616593	0.0151915
gene-LOC110701775	--	0.00731664	0.0133133	0.0151914
gene-LOC110713868	K08999 uncharacterized protein | (RefSeq) bifunctional nuclease 2-like (A)	0.0126606	0.00838897	0.0151877
gene-LOC110703525	--	0.0114746	0.00994414	0.015184
gene-LOC110690103	--	0.01074	-0.0107302	0.0151817
gene-LOC110694070	--	0.00749671	0.0132009	0.015181
gene-LOC110729593	--	-0.00838295	0.0126564	0.0151809
gene-LOC110689350	K05349 beta-glucosidase [EC:3.2.1.21] | (RefSeq) probable beta-glucosidase F (A)	0.000134896	0.01518	0.0151806
gene-LOC110735509	--	0.00717358	-0.0133781	0.0151801
gene-LOC110707677	--	0.0074765	0.0132074	0.0151767
gene-LOC110735307	K16280 E3 ubiquitin-protein ligase RGLG [EC:2.3.2.27] | (RefSeq) E3 ubiquitin-protein ligase RGLG2-like (A)	0.00156592	0.0150946	0.0151756
gene-LOC110710033	K15255 ATP-dependent DNA helicase PIF1 [EC:3.6.4.12] | (RefSeq) ATP-dependent DNA helicase pfh1-like (A)	0.0145041	-0.00446353	0.0151753
gene-LOC110709266	--	0.0149335	-0.00269486	0.0151747
gene-LOC110726974	--	0.0125812	0.00848396	0.0151745
gene-LOC110693491	--	-0.00722318	0.013345	0.0151744
gene-LOC110700175	--	0.0141984	-0.00535028	0.015173
gene-LOC110722294	K12657 delta-1-pyrroline-5-carboxylate synthetase [EC:2.7.2.11 1.2.1.41] | (RefSeq) delta-1-pyrroline-5-carboxylate synthase isoform X1 (A)	0.0071332	-0.013391	0.0151724
gene-LOC110686367	--	0.0142228	0.00528133	0.0151717
gene-LOC110692264	K12115 clock-associated PAS protein ZTL | (RefSeq) adagio protein 1-like (A)	-0.010225	0.0112009	0.0151661
gene-LOC110722801	K14494 DELLA protein | (RefSeq) DELLA protein GAI1-like (A)	0.00214721	-0.015013	0.0151658
gene-LOC110689303	K08773 RalA-binding protein 1 | (RefSeq) GTPase-activating protein BEM3-like (A)	-0.00629226	0.0137984	0.0151653
gene-LOC110703027	K22262 WD repeat and FYVE domain-containing protein 3 | (RefSeq) protein SPIRRIG (A)	-0.00139186	0.0151007	0.0151647
gene-LOC110738452	--	0.0104014	0.0110349	0.0151644
gene-LOC110715147	K14300 nuclear pore complex protein Nup133 | (RefSeq) nuclear pore complex protein NUP133 (A)	0.0110739	0.0103587	0.0151636
gene-LOC110715584	K20299 vacuolar protein sorting-associated protein 53 | (RefSeq) vacuolar protein sorting-associated protein 53 A-like (A)	0.00665959	0.0136223	0.015163
gene-LOC110682265	K05864 peptidyl-prolyl isomerase D [EC:5.2.1.8] | (RefSeq) peptidyl-prolyl cis-trans isomerase CYP40-like (A)	0.0067377	0.0135826	0.0151619
gene-LOC110731232	K22262 WD repeat and FYVE domain-containing protein 3 | (RefSeq) protein SPIRRIG (A)	0.00237865	0.0149738	0.0151615
gene-LOC110711373	--	0.00756556	-0.0131389	0.0151614
gene-LOC110689658	K17345 tetraspanin-5 | (RefSeq) tetraspanin-19-like (A)	0.00143514	0.0150931	0.0151612
gene-LOC110730905	--	0.000192168	0.0151593	0.0151605
gene-LOC110717626	K19791 iron transport multicopper oxidase | (RefSeq) L-ascorbate oxidase homolog (A)	0.0103734	0.011054	0.0151591
gene-LOC110711667	K14404 cleavage and polyadenylation specificity factor subunit 4 | (RefSeq) uncharacterized protein LOC110724600 (A)	0.00408154	0.0145991	0.0151589
gene-LOC110682043	--	-0.0102321	0.0111761	0.0151526
gene-LOC110702682	--	0.0111537	0.0102561	0.0151524
gene-LOC110692598	K05016 chloride channel 7 | (RefSeq) LOW QUALITY PROTEIN: chloride channel protein CLC-a-like (A)	-0.0084675	0.0125656	0.0151524
gene-LOC110691407	K01188 beta-glucosidase [EC:3.2.1.21] | (RefSeq) beta-glucosidase 12-like (A)	-0.00580629	0.0139942	0.0151509
gene-LOC110725231	K01061 carboxymethylenebutenolidase [EC:3.1.1.45] | (RefSeq) carboxymethylenebutenolidase homolog (A)	-0.0100712	0.0113191	0.0151509
gene-LOC110697216	--	-0.00774393	0.0130217	0.0151504
gene-LOC110740269	K17604 zinc finger SWIM domain-containing protein 3 | (RefSeq) protein FAR1-RELATED SEQUENCE 6 (A)	0.00833179	0.0126439	0.0151422
gene-LOC110705998	--	0.0109852	0.0104112	0.015135
gene-LOC110730032	K15078 structure-specific endonuclease subunit SLX1 [EC:3.6.1.-] | (RefSeq) putative disease resistance protein RGA1 (A)	-0.0110061	0.0103885	0.0151346
gene-LOC110702457	K12235 serine racemase [EC:5.1.1.18] | (RefSeq) serine racemase-like (A)	-0.0108697	0.0105282	0.0151326
gene-LOC110720388	--	-0.0130256	0.00770005	0.0151313
gene-LOC110723278	--	-0.00931999	0.0119198	0.0151309
gene-LOC110704577	K00660 chalcone synthase [EC:2.3.1.74] | (RefSeq) chalcone synthase 3-like (A)	0.00975856	0.0115599	0.0151282
gene-LOC110687395	K13424 WRKY transcription factor 33 | (RAP-DB) Os05g0474800, WRKY70, WRKY_GENE_70; WRKY transcription factor 70. (A)	-0.00503158	0.0142649	0.0151263
gene-LOC110689155	--	0.00275143	0.0148733	0.0151257
gene-LOC110732490	K20279 synaptojanin [EC:3.1.3.36] | (RefSeq) type IV inositol polyphosphate 5-phosphatase 3-like isoform X1 (A)	0.0105804	-0.0108091	0.0151255
gene-LOC110692746	K13199 plasminogen activator inhibitor 1 RNA-binding protein | (RefSeq) nuclear RNA-binding-like protein (A)	0.0110023	0.0103784	0.0151249
gene-LOC110697210	K21596 calmodulin-binding transcription activator | (RefSeq) calmodulin-binding transcription activator 5-like isoform X1 (A)	-0.0137813	0.00622841	0.0151234
gene-LOC110738530	K09264 MADS-box transcription factor, plant | (RefSeq) floral homeotic protein PMADS 1-like (A)	0.0136666	-0.00647183	0.0151215
gene-LOC110739243	K18995 ATP-dependent RNA helicase DHX29 [EC:3.6.4.13] | (RefSeq) uncharacterized helicase C15C4.05-like (A)	-0.00377417	0.0146428	0.0151214
gene-LOC110686637	--	0.0148672	0.00275573	0.0151205
gene-LOC110686627	K06195 ApaG protein | (RefSeq) uncharacterized protein LOC109816810 isoform X1 (A)	-0.00654867	-0.0136279	0.0151197
gene-LOC110700071	K02876 large subunit ribosomal protein L15 | (RefSeq) uncharacterized protein LOC110700071 (A)	0.0033825	0.014736	0.0151192
gene-LOC110713170	K21989 calcium permeable stress-gated cation channel | (RefSeq) CSC1-like protein At1g69450 (A)	-0.00563042	0.0140308	0.0151184
gene-LOC110702369	K07447 putative holliday junction resolvase [EC:3.1.-.-] | (RefSeq) uncharacterized protein LOC110702369 (A)	0.00634512	0.0137198	0.015116
gene-LOC110736135	K00963 UTP--glucose-1-phosphate uridylyltransferase [EC:2.7.7.9] | (RefSeq) UTP--glucose-1-phosphate uridylyltransferase-like (A)	0.0140735	-0.00551205	0.0151145
gene-LOC110710393	K13172 serine/arginine repetitive matrix protein 2 | (RefSeq) trichohyalin-like (A)	-0.00752209	0.0131091	0.0151139
gene-LOC110690724	K05349 beta-glucosidase [EC:3.2.1.21] | (RefSeq) probable beta-glucosidase F (A)	-0.00511345	0.0142192	0.0151107
gene-LOC110712914	K13422 transcription factor MYC2 | (RefSeq) transcription factor MYC2-like (A)	-0.0073548	0.0131968	0.0151079
gene-LOC110722460	--	0.0114617	0.00984075	0.0151067
gene-LOC110682669	K15730 cytosolic prostaglandin-E synthase [EC:5.3.99.3] | (RefSeq) uncharacterized protein OsI_027940-like (A)	0.0135359	-0.00670391	0.0151051
gene-LOC110724300	--	-0.0113469	0.00996768	0.0151032
gene-LOC110732782	--	-0.0116659	0.0095894	0.0151013
gene-LOC110723058	K17499 protein phosphatase 1G [EC:3.1.3.16] | (RefSeq) probable protein phosphatase 2C 60 isoform X1 (A)	-0.0108424	0.01051	0.0151002
gene-LOC110707880	--	0.00108246	-0.0150555	0.0150943
gene-LOC110727371	K00878 hydroxyethylthiazole kinase [EC:2.7.1.50] | (RefSeq) hydroxyethylthiazole kinase-like (A)	0.0141572	0.00522775	0.0150916
gene-LOC110715382	K14400 pre-mRNA cleavage complex 2 protein Pcf11 | (RefSeq) LOW QUALITY PROTEIN: uncharacterized protein LOC111982967 (A)	-0.00551544	0.0140469	0.0150909
gene-LOC110707527	--	-0.00939822	0.0118067	0.0150906
gene-LOC110694122	K01381 saccharopepsin [EC:3.4.23.25] | (RefSeq) aspartic proteinase CDR1-like (A)	-0.0109567	0.0103761	0.0150902
gene-LOC110702455	K07375 tubulin beta | (RefSeq) tubulin beta-8 chain-like (A)	-0.00714551	0.0132911	0.0150901
gene-LOC110724588	K16222 Dof zinc finger protein DOF5.5 | (RefSeq) cyclic dof factor 3-like (A)	0.0118755	-0.00931009	0.0150899
gene-LOC110707125	K10878 meiotic recombination protein SPO11 | (RefSeq) meiotic recombination protein SPO11-2-like (A)	-0.00723048	0.013244	0.0150892
gene-LOC110699160	--	0.000863493	-0.0150626	0.0150873
gene-LOC110729758	K03452 magnesium/proton exchanger | (RefSeq) uncharacterized LOC18613571 (A)	-0.00251134	0.0148762	0.0150866
gene-LOC110710791	K14396 polyadenylate-binding protein 2 | (RefSeq) polyadenylate-binding protein 2-like (A)	-0.00971614	0.0115407	0.0150861
gene-LOC110685366	K00592 [ribulose-bisphosphate carboxylase]/[fructose-bisphosphate aldolase]-lysine N-methyltransferase [EC:2.1.1.127 2.1.1.259] | (RefSeq) fructose-bisphosphate aldolase-lysine N-methyltransferase, chloroplastic (A)	-0.00831465	0.0125867	0.0150851
gene-LOC110701252	K23541 Ca2+/H+ antiporter, TMEM165/GDT1 family | (RefSeq) putative pentatricopeptide repeat-containing protein At3g23330 (A)	0.000278949	0.015082	0.0150846
gene-LOC110708654	K10732 GINS complex subunit 1 | (RefSeq) DNA replication complex GINS protein PSF1-like isoform X1 (A)	0.00748357	0.0130917	0.0150797
gene-LOC110706483	K15382 solute carrier family 50 (sugar transporter) | (RefSeq) bidirectional sugar transporter SWEET6b-like isoform X1 (A)	0.013207	0.00727579	0.0150785
gene-LOC110720836	K15281 solute carrier family 35 | (RefSeq) UDP-galactose/UDP-glucose transporter 7-like isoform X1 (A)	0.010566	0.0107534	0.0150757
gene-LOC110685213	K15201 general transcription factor 3C polypeptide 3 (transcription factor C subunit 4) | (RefSeq) general transcription factor 3C polypeptide 3-like (A)	0.0114973	0.00975088	0.0150754
gene-LOC110723331	K06180 23S rRNA pseudouridine1911/1915/1917 synthase [EC:5.4.99.23] | (RefSeq) pentatricopeptide repeat-containing protein At1g20230 isoform X1 (A)	-0.000860754	0.0150506	0.0150752
gene-LOC110713994	K13066 caffeic acid 3-O-methyltransferase [EC:2.1.1.68] | (RefSeq) caffeic acid 3-O-methyltransferase-like isoform X1 (A)	0.0109834	0.0103232	0.0150732
gene-LOC110693717	K00430 peroxidase [EC:1.11.1.7] | (RefSeq) peroxidase 19-like (A)	-0.00896784	-0.0121138	0.015072
gene-LOC110702759	K05356 all-trans-nonaprenyl-diphosphate synthase [EC:2.5.1.84 2.5.1.85] | (RefSeq) probable solanesyl-diphosphate synthase 3, chloroplastic (A)	0.000758789	-0.0150528	0.0150719
gene-LOC110703218	--	0.00700762	-0.0133423	0.0150706
gene-LOC110724454	K01800 maleylacetoacetate isomerase [EC:5.2.1.2] | (RefSeq) glutathione S-transferase 2-like (A)	-0.0115414	0.00968888	0.0150691
gene-LOC110703360	K23280 rhamnogalacturonan I rhamnosyltransferase [EC:2.4.1.351] | (RefSeq) uncharacterized protein At1g04910-like (A)	0.01456	0.00388182	0.0150686
gene-LOC110725892	K06671 cohesin complex subunit SA-1/2 | (RefSeq) sister-chromatid cohesion protein 3-like (A)	0.00551846	0.0140212	0.0150681
gene-LOC110713494	K03787 5'-nucleotidase [EC:3.1.3.5] | (RefSeq) uncharacterized protein LOC110713494 isoform X1 (A)	-0.00484205	0.0142662	0.0150656
gene-LOC110733132	K11778 ditrans,polycis-polyprenyl diphosphate synthase [EC:2.5.1.87] | (RefSeq) dehydrodolichyl diphosphate synthase 6-like (A)	-0.00924124	0.0118969	0.0150645
gene-LOC110712317	--	0.00997937	0.0112846	0.0150642
gene-LOC110710095	--	0.0110818	0.0102037	0.0150639
gene-LOC110697702	K22522 cytokinin riboside 5'-monophosphate phosphoribohydrolase [EC:3.2.2.-] | (RefSeq) cytokinin riboside 5'-monophosphate phosphoribohydrolase LOG1-like (A)	0.0129483	-0.00769643	0.015063
gene-LOC110701383	--	0.0146558	0.0034685	0.0150607
gene-LOC110727349	--	-0.0115762	0.00963239	0.0150596
gene-LOC110720624	--	0.00690099	0.013385	0.0150593
gene-LOC110701609	--	0.0123628	0.00859716	0.0150582
gene-LOC110717116	--	0.0147991	0.00277704	0.0150574
gene-LOC110684987	--	0.0107714	0.0105156	0.0150533
gene-LOC110688503	K13447 respiratory burst oxidase [EC:1.6.3.- 1.11.1.-] | (RefSeq) RHD2L1-1; hypothetical protein (A)	-0.0020412	0.0149142	0.0150533
gene-LOC110716638	--	0.0120762	0.0089863	0.0150528
gene-LOC110734116	K01051 pectinesterase [EC:3.1.1.11] | (RefSeq) probable pectinesterase 53 (A)	0.00623314	0.0137015	0.0150526
gene-LOC110705669	K19045 E3 ubiquitin-protein ligase BIG BROTHER and related proteins [EC:2.3.2.27] | (RefSeq) E3 ubiquitin ligase BIG BROTHER-like (A)	0.00286201	0.014778	0.0150526
gene-LOC110701952	K01052 lysosomal acid lipase/cholesteryl ester hydrolase [EC:3.1.1.13] | (RefSeq) triacylglycerol lipase 2-like (A)	-0.00289584	0.014771	0.0150521
gene-LOC110696983	K08866 serine/threonine-protein kinase TTK/MPS1 [EC:2.7.12.1] | (RefSeq) protein kinase 3-like isoform X1 (A)	0.0134759	0.0067023	0.0150506
gene-LOC110738831	--	-0.00671873	0.0134665	0.0150495
gene-LOC110704771	--	-0.00850687	0.012413	0.0150482
gene-LOC110716624	--	0.014666	-0.00336929	0.015048
gene-LOC110689424	K09648 mitochondrial inner membrane protease subunit 2 [EC:3.4.21.-] | (RefSeq) mitochondrial inner membrane protease subunit 2 (A)	0.0109938	0.0102746	0.0150476
gene-LOC110689767	K01933 phosphoribosylformylglycinamidine cyclo-ligase [EC:6.3.3.1] | (RefSeq) phosphoribosylformylglycinamidine cyclo-ligase, chloroplastic-like (A)	0.00480401	0.0142599	0.0150474
gene-LOC110684308	K05350 beta-glucosidase [EC:3.2.1.21] | (RefSeq) beta-glucosidase 44-like (A)	-0.00980584	0.0114128	0.0150468
gene-LOC110711582	K11820 N-hydroxythioamide S-beta-glucosyltransferase [EC:2.4.1.195] | (RefSeq) hypothetical protein (A)	0.0124011	0.0085151	0.0150431
gene-LOC110707836	--	0.00231915	0.0148627	0.0150426
gene-LOC110721658	K20606 mitogen-activated protein kinase kinase kinase ANP1 [EC:2.7.11.25] | (RefSeq) receptor-like serine/threonine-protein kinase SD1-7 isoform X1 (A)	-0.0110797	0.0101721	0.015041
gene-LOC110691783	K13508 glycerol-3-phosphate acyltransferase [EC:2.3.1.15 2.3.1.198] | (RefSeq) glycerol-3-phosphate acyltransferase 1-like (A)	-0.00800895	0.0127299	0.0150397
gene-LOC110730075	K12897 transformer-2 protein | (RefSeq) serine/arginine-rich splicing factor SR45a-like (A)	0.00364909	-0.0145886	0.0150381
gene-LOC110704086	--	0.0112931	0.00992751	0.0150363
gene-LOC110726802	K08869 aarF domain-containing kinase | (RefSeq) uncharacterized protein LOC110726802 (A)	0.00741773	-0.0130791	0.0150362
gene-LOC110733933	K17290 oxidoreductase [EC:1.1.1.-] | (RefSeq) Oxidoreductase HTATIP2 (A)	0.01345	-0.00671494	0.0150331
gene-LOC110684090	--	-0.00884169	0.0121573	0.0150325
gene-LOC110708503	--	0.0109544	0.0102935	0.0150318
gene-LOC110690741	K13430 serine/threonine-protein kinase PBS1 [EC:2.7.11.1] | (RefSeq) serine/threonine-protein kinase PBS1-like (A)	-0.0119472	0.00912192	0.0150314
gene-LOC110714386	--	-0.00201714	0.0148948	0.0150308
gene-LOC110685425	--	-0.00190545	-0.0149078	0.015029
gene-LOC110706940	--	-0.00955981	0.0115965	0.0150289
gene-LOC110701195	K01262 Xaa-Pro aminopeptidase [EC:3.4.11.9] | (RefSeq) probable Xaa-Pro aminopeptidase 3 (A)	0.00320384	0.0146833	0.0150288
gene-LOC110699922	--	0.00753072	0.0130052	0.0150282
gene-LOC110730253	--	0.000886205	0.0150011	0.0150273
gene-LOC110719598	K03239 translation initiation factor eIF-2B subunit alpha | (RefSeq) methylthioribose-1-phosphate isomerase (A)	-0.000517101	0.0150167	0.0150256
gene-LOC110704618	--	0.0138446	-0.00582611	0.0150205
gene-LOC110695617	--	0.0107046	0.0105365	0.0150202
gene-LOC110726900	--	0.00871479	0.0122332	0.0150199
gene-LOC110722087	--	-0.00553119	0.0139633	0.0150189
gene-LOC110693469	K20291 conserved oligomeric Golgi complex subunit 4 | (RefSeq) pentatricopeptide repeat-containing protein At4g01400, mitochondrial (A)	0.00453409	0.0143155	0.0150164
gene-LOC110697852	--	0.00944751	0.0116698	0.0150147
gene-LOC110716960	--	0.0133484	0.00687209	0.0150136
gene-LOC110690955	--	-0.00723626	-0.0131545	0.0150135
gene-LOC110687784	--	-0.011713	-0.00939118	0.015013
gene-LOC110682039	K01051 pectinesterase [EC:3.1.1.11] | (RefSeq) probable pectinesterase/pectinesterase inhibitor 58 (A)	-0.0108456	0.0103798	0.0150122
gene-LOC110727794	--	0.00399954	-0.0144692	0.0150118
gene-LOC110692247	K00327 NADPH-ferrihemoprotein reductase [EC:1.6.2.4] | (RefSeq) NADPH--cytochrome P450 reductase-like (A)	0.0134391	-0.00668612	0.0150104
gene-LOC110700924	--	0.0076596	0.0129077	0.0150092
gene-LOC110734214	K00789 S-adenosylmethionine synthetase [EC:2.5.1.6] | (RefSeq) S-adenosylmethionine synthase 2 (A)	0.0107207	-0.0105039	0.0150088
gene-LOC110700606	--	-0.0097441	0.011415	0.0150083
gene-LOC110683775	K06173 tRNA pseudouridine38-40 synthase [EC:5.4.99.12] | (RefSeq) uncharacterized protein LOC107470304 isoform X1 (A)	-0.00504116	0.0141349	0.0150069
gene-LOC110684627	K02326 DNA polymerase epsilon subunit 3 [EC:2.7.7.7] | (RefSeq) DNA polymerase epsilon subunit 3-like (A)	0.00372016	0.0145383	0.0150067
gene-LOC110727933	K15042 importin subunit alpha-6/7 | (RefSeq) importin subunit alpha-4-like (A)	0.0149588	0.00119635	0.0150066
gene-LOC110686123	K00889 1-phosphatidylinositol-4-phosphate 5-kinase [EC:2.7.1.68] | (RefSeq) phosphatidylinositol 4-phosphate 5-kinase 6-like (A)	-0.0108117	0.0104068	0.0150065
gene-LOC110684634	--	0.00516465	-0.0140884	0.0150053
gene-LOC110682662	K15271 ATP-dependent DNA helicase HFM1/MER3 [EC:3.6.4.12] | (RefSeq) DExH-box ATP-dependent RNA helicase DExH17 (A)	-0.00250403	0.0147937	0.0150041
gene-LOC110712935	K01188 beta-glucosidase [EC:3.2.1.21] | (RefSeq) beta-glucosidase 12 (A)	0.0108478	0.0103585	0.0149991
gene-LOC110732402	K13783 MFS transporter, OPA family, solute carrier family 37 (glycerol-3-phosphate transporter), member 1/2 | (RefSeq) putative glycerol-3-phosphate transporter 4 (A)	0.0108938	-0.0103092	0.0149985
gene-LOC110699044	K12890 splicing factor, arginine/serine-rich 1 | (RefSeq) uncharacterized protein LOC103422586 isoform X1 (A)	0.0114281	-0.00971269	0.014998
gene-LOC110724717	K06180 23S rRNA pseudouridine1911/1915/1917 synthase [EC:5.4.99.23] | (RefSeq) pentatricopeptide repeat-containing protein At1g20230 isoform X1 (A)	0.00163084	0.0149084	0.0149974
gene-LOC110723323	K11098 small nuclear ribonucleoprotein F | (RefSeq) probable small nuclear ribonucleoprotein F isoform X1 (A)	0.0106242	0.010584	0.0149965
gene-LOC110717375	K09419 heat shock transcription factor, other eukaryote | (RefSeq) heat stress transcription factor A-1-like (A)	-0.00614541	0.013679	0.014996
gene-LOC110697091	--	0.0128645	-0.00770596	0.0149959
gene-LOC110736590	K19882 O-palmitoleoyl-L-serine hydrolase [EC:3.1.1.98] | (RefSeq) pectin acetylesterase 12-like (A)	0.00977984	-0.0113679	0.0149958
gene-LOC110738798	K02987 small subunit ribosomal protein S4e | (RefSeq) 40S ribosomal protein S4-C (A)	-0.0122988	0.00857968	0.0149957
gene-LOC110719416	--	0.00813284	0.0125964	0.0149938
gene-LOC110684660	--	0.0088005	-0.0121389	0.0149934
gene-LOC110686449	--	0.0123912	-0.00844076	0.014993
gene-LOC110718872	K01623 fructose-bisphosphate aldolase, class I [EC:4.1.2.13] | (RefSeq) fructose-bisphosphate aldolase 1, chloroplastic-like (A)	0.00145392	-0.0149223	0.0149929
gene-LOC110740307	K19041 E3 ubiquitin-protein ligase RNF38/44 [EC:2.3.2.27] | (RefSeq) probable E3 ubiquitin-protein ligase ZFP1 (A)	0.0120111	0.00897157	0.0149918
gene-LOC110716236	K01456 peptide-N4-(N-acetyl-beta-glucosaminyl)asparagine amidase [EC:3.5.1.52] | (RefSeq) LOW QUALITY PROTEIN: peptide-N(4)-(N-acetyl-beta-glucosaminyl)asparagine amidase-like (A)	0.0116496	0.00943507	0.0149911
gene-LOC110731330	K00703 starch synthase [EC:2.4.1.21] | (RefSeq) starch synthase 3, chloroplastic/amyloplastic-like (A)	-0.0127413	0.00789857	0.0149909
gene-LOC110703895	--	0.0142063	0.00478395	0.0149902
gene-LOC110731292	K14012 UBX domain-containing protein 1 | (RefSeq) plant UBX domain-containing protein 4-like (A)	-0.0105983	0.0105999	0.0149894
gene-LOC110696005	--	0.014302	0.00448175	0.0149878
gene-LOC110713617	K13179 ATP-dependent RNA helicase DDX18/HAS1 [EC:3.6.4.13] | (RefSeq) hypothetical protein (A)	0.0017489	0.0148824	0.0149848
gene-LOC110721889	K15588 histone-lysine N-methyltransferase NSD1 [EC:2.1.1.43] | (RefSeq) hypothetical protein (A)	0.0104553	0.0107345	0.0149847
gene-LOC110736409	K16296 serine carboxypeptidase-like clade I [EC:3.4.16.-] | (RefSeq) serine carboxypeptidase-like 20 (A)	-0.00495906	0.0141391	0.0149835
gene-LOC110690802	--	0.0108448	0.0103389	0.0149834
gene-LOC110737381	--	0.0132084	-0.00706915	0.0149812
gene-LOC110710218	K17710 pentatricopeptide repeat domain-containing protein 1 | (RefSeq) hypothetical protein (A)	0.014556	-0.00354072	0.0149805
gene-LOC110701482	--	-0.0127888	0.00780011	0.0149798
gene-LOC110707025	K13457 disease resistance protein RPM1 | (RefSeq) disease resistance protein RPM1-like (A)	-0.00270836	0.0147325	0.0149794
gene-LOC110736862	K10994 cell cycle checkpoint control protein RAD9A [EC:3.1.11.2] | (RefSeq) cell cycle checkpoint control protein RAD9A-like (A)	0.00994118	0.0111959	0.0149725
gene-LOC110710776	K17290 oxidoreductase [EC:1.1.1.-] | (RefSeq) Oxidoreductase HTATIP2 (A)	0.0129521	-0.00750901	0.0149714
gene-LOC110685230	--	-0.00798276	0.0126649	0.0149708
gene-LOC110698919	K13428 LRR receptor-like serine/threonine-protein kinase EFR [EC:2.7.11.1] | (RefSeq) LRR receptor-like serine/threonine-protein kinase EFR (A)	-0.0109973	0.0101508	0.014966
gene-LOC110729180	K00326 cytochrome-b5 reductase [EC:1.6.2.2] | (RefSeq) NADH-cytochrome b5 reductase-like protein (A)	-0.0103928	0.0107657	0.0149637
gene-LOC110688687	K03018 DNA-directed RNA polymerase III subunit RPC1 [EC:2.7.7.6] | (RefSeq) DNA-directed RNA polymerase III subunit 1-like (A)	-0.00947861	0.0115762	0.0149617
gene-LOC110736621	--	0.0147843	0.00228997	0.0149606
gene-LOC110735493	--	0.0149562	0.000317894	0.0149596
gene-LOC110689952	K01303 acylaminoacyl-peptidase [EC:3.4.19.1] | (RefSeq) uncharacterized LOC101311565 (A)	0.011477	-0.00959302	0.0149582
gene-LOC110728726	K14400 pre-mRNA cleavage complex 2 protein Pcf11 | (RefSeq) LOW QUALITY PROTEIN: uncharacterized protein LOC111982967 (A)	0.00742242	0.0129856	0.0149572
gene-LOC110720073	--	0.014318	0.00432564	0.0149571
gene-LOC110713453	--	-0.00872539	0.0121479	0.0149567
gene-LOC110718556	K09250 cellular nucleic acid-binding protein | (RefSeq) cold shock domain-containing protein 3-like (A)	-0.00535323	0.0139657	0.0149565
gene-LOC110692997	K12930 anthocyanidin 3-O-glucosyltransferase [EC:2.4.1.115] | (RefSeq) anthocyanidin 3-O-glucosyltransferase 7-like (A)	0.00760206	-0.0128778	0.0149542
gene-LOC110735221	--	0.0111353	0.00997565	0.0149502
gene-LOC110708590	K17426 large subunit ribosomal protein L45 | (RefSeq) 39S ribosomal protein L45, mitochondrial-like (A)	0.00090266	0.0149207	0.014948
gene-LOC110688233	K03007 DNA-directed RNA polymerases I, II, and III subunit RPABC5 | (RefSeq) DNA-directed RNA polymerases I, II, and III subunit RPABC5 (A)	-0.0105536	0.0105849	0.0149472
gene-LOC110689244	K10256 omega-6 fatty acid desaturase / acyl-lipid omega-6 desaturase (Delta-12 desaturase) [EC:1.14.19.6 1.14.19.22] | (RefSeq) delta(12)-fatty-acid desaturase FAD2-like (A)	0.0145304	-0.00350219	0.0149465
gene-LOC110693513	K01082 3'(2'), 5'-bisphosphate nucleotidase [EC:3.1.3.7] | (RefSeq) putative PAP-specific phosphatase, mitochondrial (A)	0.0145033	-0.00360959	0.0149457
gene-LOC110687378	K08341 GABA(A) receptor-associated protein | (RefSeq) autophagy-related protein 8C-like (A)	-0.00533784	0.0139586	0.0149444
gene-LOC110698033	K12116 flavin-binding kelch repeat F-box protein 1 | (RefSeq) adagio protein 3-like (A)	-0.00605743	0.0136606	0.0149434
gene-LOC110696462	K03352 anaphase-promoting complex subunit 5 | (RefSeq) anaphase-promoting complex subunit 5-like isoform X1 (A)	0.00729933	0.0130384	0.0149426
gene-LOC110698929	K22733 magnesium transporter | (RefSeq) uncharacterized protein LOC102612526 (A)	0.00442275	0.0142724	0.0149419
gene-LOC110737065	--	0.0097493	0.011318	0.0149381
gene-LOC110723173	K03452 magnesium/proton exchanger | (RefSeq) pentatricopeptide repeat-containing protein At3g62890-like (A)	-0.000129347	0.014934	0.0149346
gene-LOC110724403	--	0.0097707	0.0112947	0.0149344
gene-LOC110714866	K11593 eukaryotic translation initiation factor 2C | (RefSeq) protein argonaute 4-like isoform X1 (A)	0.0117184	0.00925614	0.0149331
gene-LOC110725642	K22519 protein disulfide-isomerase [EC:5.3.4.1] | (RefSeq) protein disulfide isomerase pTAC5, chloroplastic-like (A)	-0.00735416	0.012995	0.0149316
gene-LOC110686270	--	0.014308	0.00426753	0.0149309
gene-LOC110729060	K12355 coniferyl-aldehyde dehydrogenase [EC:1.2.1.68] | (RefSeq) aldehyde dehydrogenase family 2 member C4-like (A)	0.0123729	-0.00835431	0.0149292
gene-LOC110739883	K12448 UDP-arabinose 4-epimerase [EC:5.1.3.5] | (RefSeq) UDP-arabinose 4-epimerase 1-like (A)	0.0122003	0.00860365	0.0149288
gene-LOC110700979	K17964 leucine-rich PPR motif-containing protein, mitochondrial | (RefSeq) pentatricopeptide repeat-containing protein At5g61990, mitochondrial (A)	-0.0023468	0.0147431	0.0149287
gene-LOC110709248	K13195 cold-inducible RNA-binding protein | (RefSeq) small RNA-binding protein 11, chloroplastic (A)	0.00983549	0.0112295	0.0149278
gene-LOC110716997	K02603 origin recognition complex subunit 1 | (RefSeq) origin of replication complex subunit 1B-like (A)	-0.00648903	0.0134434	0.0149276
gene-LOC110718273	K17800 LETM1 and EF-hand domain-containing protein 1, mitochondrial | (RefSeq) mitochondrial proton/calcium exchanger protein-like (A)	0.00119136	0.0148795	0.0149271
gene-LOC110732092	--	0.00117885	0.0148793	0.014926
gene-LOC110685076	--	-0.00975451	0.0112973	0.0149258
gene-LOC110701914	--	0.0114108	0.0096192	0.0149243
gene-LOC110682979	--	-0.00726196	0.0130384	0.0149243
gene-LOC110733416	--	-0.010102	0.0109838	0.0149229
gene-LOC110729265	K15119 solute carrier family 25, member 39/40 | (RefSeq) mitochondrial carrier protein MTM1-like (A)	0.00717611	-0.0130824	0.0149213
gene-LOC110704874	--	0.00703869	-0.0131565	0.014921
gene-LOC110735646	K08867 WNK lysine deficient protein kinase [EC:2.7.11.1] | (RefSeq) serine/threonine-protein kinase WNK8-like (A)	0.00898573	0.0119116	0.0149208
gene-LOC110711494	K01209 alpha-L-arabinofuranosidase [EC:3.2.1.55] | (RefSeq) alpha-L-arabinofuranosidase 1-like (A)	-0.0118206	0.00910458	0.0149204
gene-LOC110712771	--	-0.0072682	0.0130291	0.0149193
gene-LOC110691152	K02180 cell cycle arrest protein BUB3 | (RefSeq) mitotic checkpoint protein BUB3.3-like isoform X1 (A)	0.0109634	0.0101187	0.0149192
gene-LOC110697963	--	0.0106018	0.0104966	0.014919
gene-LOC110693718	K07555 ATP synthase mitochondrial F1 complex assembly factor 1 | (RefSeq) uncharacterized protein LOC110693718 (A)	-0.00363341	0.0144682	0.0149175
gene-LOC110724581	--	0.00946009	0.0115301	0.0149143
gene-LOC110715188	K08832 serine/threonine-protein kinase SRPK3 [EC:2.7.11.1] | (RefSeq) SRSF protein kinase 1 (A)	0.00774008	0.0127479	0.0149137
gene-LOC110721800	--	0.0147697	-0.00205964	0.0149126
gene-LOC110701999	K21843 tetratricopeptide repeat protein 7 | (RefSeq) protein NPG1-like (A)	-0.00562407	0.0138085	0.0149099
gene-LOC110688856	--	-0.00961858	0.0113908	0.0149086
gene-LOC110727469	--	-0.00380478	0.0144138	0.0149075
gene-LOC110699250	--	-0.00966365	0.0113476	0.0149048
gene-LOC110698208	--	-9.7661e-05	0.0149044	0.0149047
gene-LOC110700333	K00521 ferric-chelate reductase [EC:1.16.1.7] | (RefSeq) ferric reduction oxidase 8, mitochondrial-like isoform X1 (A)	-0.00994415	0.0111006	0.0149033
gene-LOC110690753	K13116 ATP-dependent RNA helicase DDX41 [EC:3.6.4.13] | (RefSeq) uncharacterized protein LOC110093888 isoform X1 (A)	-0.00169191	0.0148068	0.0149032
gene-LOC110723251	K22395 cinnamyl-alcohol dehydrogenase [EC:1.1.1.195] | (RefSeq) berberine bridge enzyme-like 13 (A)	-0.00500892	0.0140362	0.0149032
gene-LOC110695559	--	-0.00689979	0.0132074	0.0149011
gene-LOC110683776	K14486 auxin response factor | (RefSeq) auxin response factor 19-like (A)	0.0106305	0.0104414	0.0149007
gene-LOC110714878	K12818 ATP-dependent RNA helicase DHX8/PRP22 [EC:3.6.4.13] | (RefSeq) hypothetical protein (A)	0.0101464	-0.0109123	0.0149006
gene-LOC110694369	K14400 pre-mRNA cleavage complex 2 protein Pcf11 | (RefSeq) LOW QUALITY PROTEIN: uncharacterized protein LOC111982967 (A)	0.00788287	0.0126432	0.0148993
gene-LOC110715765	K07441 beta-1,4-N-acetylglucosaminyltransferase [EC:2.4.1.141] | (RefSeq) UDP-N-acetylglucosamine transferase subunit ALG14 homolog (A)	0.0129774	-0.00731231	0.0148957
gene-LOC110696649	K07198 5'-AMP-activated protein kinase, catalytic alpha subunit [EC:2.7.11.11] | (RefSeq) CBL-interacting serine/threonine-protein kinase 6 (A)	-0.00271511	0.014644	0.0148936
gene-LOC110697533	K00943 dTMP kinase [EC:2.7.4.9] | (RefSeq) glutathione S-transferase T3-like (A)	-0.00575875	0.0137309	0.0148896
gene-LOC110706211	--	0.0115102	0.00944292	0.014888
gene-LOC110738477	K01681 aconitate hydratase [EC:4.2.1.3] | (RefSeq) putative aconitate hydratase, cytoplasmic (A)	-0.00997662	0.0110502	0.0148876
gene-LOC110710934	--	0.00435857	0.0142346	0.014887
gene-LOC110726169	K16276 zinc finger protein-like protein | (RefSeq) uncharacterized LOC101263990 (A)	0.00878427	0.0120122	0.0148814
gene-LOC110739227	K05666 ATP-binding cassette, subfamily C (CFTR/MRP), member 2 | (RefSeq) ABC transporter C family member 14-like (A)	0.0113537	-0.00961918	0.0148807
gene-LOC110702796	--	0.00927878	0.0116298	0.0148777
gene-LOC110724549	--	0.00123985	-0.0148251	0.0148769
gene-LOC110737753	K13416 brassinosteroid insensitive 1-associated receptor kinase 1 [EC:2.7.10.1 2.7.11.1] | (RefSeq) BRASSINOSTEROID INSENSITIVE 1-associated receptor kinase 1-like (A)	-0.00855921	0.0121658	0.0148751
gene-LOC110740095	K17964 leucine-rich PPR motif-containing protein, mitochondrial | (RefSeq) pentatricopeptide repeat-containing protein At1g63330-like (A)	0.00203821	0.0147346	0.0148749
gene-LOC110719543	K15078 structure-specific endonuclease subunit SLX1 [EC:3.6.1.-] | (RefSeq) putative disease resistance protein RGA3 (A)	-0.00289349	0.014589	0.0148731
gene-LOC110726472	K23398 activating signal cointegrator 1 | (RefSeq) activating signal cointegrator 1-like (A)	0.0125776	-0.00793564	0.0148718
gene-LOC110694924	K13416 brassinosteroid insensitive 1-associated receptor kinase 1 [EC:2.7.10.1 2.7.11.1] | (RefSeq) BRASSINOSTEROID INSENSITIVE 1-associated receptor kinase 1-like (A)	0.00775155	0.0126874	0.014868
gene-LOC110703125	K10268 F-box and leucine-rich repeat protein 2/20 | (RefSeq) F-box/LRR-repeat protein 3-like (A)	0.0089826	-0.0118457	0.0148663
gene-LOC110735132	--	0.0117723	0.00907826	0.0148661
gene-LOC110704126	--	0.00887951	-0.0119221	0.0148654
gene-LOC110685886	K01051 pectinesterase [EC:3.1.1.11] | (RefSeq) probable pectinesterase 53 isoform X1 (A)	0.0140078	0.00497154	0.0148639
gene-LOC110734448	K17505 protein phosphatase 1K [EC:3.1.3.16] | (RAP-DB) Os11g0586001; Putative protein phosphatase 2C 76. (A)	0.00279813	0.0145969	0.0148626
gene-LOC110695238	K10406 kinesin family member C2/C3 | (RefSeq) kinesin-like protein KIF3B (A)	0.0148577	0.000365119	0.0148622
gene-LOC110727476	--	0.0133001	0.00662982	0.0148609
gene-LOC110722379	K08333 phosphoinositide-3-kinase, regulatory subunit 4 [EC:2.7.11.1] | (RefSeq) probable serine/threonine-protein kinase vps15 (A)	-0.00636938	0.013426	0.0148603
gene-LOC110693527	K05350 beta-glucosidase [EC:3.2.1.21] | (RefSeq) beta-glucosidase 46 (A)	0.00160378	0.0147723	0.0148592
gene-LOC110715983	--	-0.00935258	0.0115463	0.014859
gene-LOC110710348	K01669 deoxyribodipyrimidine photo-lyase [EC:4.1.99.3] | (RefSeq) cryptochrome DASH, chloroplastic/mitochondrial-like (A)	0.0139278	-0.00517514	0.0148581
gene-LOC110713632	--	-0.0105754	-0.0104328	0.0148554
gene-LOC110700184	--	0.014493	0.00325193	0.0148534
gene-LOC110695244	K16075 magnesium transporter | (RefSeq) magnesium transporter MRS2-I-like (A)	-0.0110123	-0.00996609	0.0148524
gene-LOC110691760	K19861 benzyl alcohol O-benzoyltransferase [EC:2.3.1.196 2.3.1.232] | (RefSeq) benzyl alcohol O-benzoyltransferase-like (A)	0.0136967	0.00574293	0.014852
gene-LOC110730512	--	0.000244116	0.0148478	0.0148498
gene-LOC110726097	--	0.00453212	0.0141397	0.0148483
gene-LOC110684054	K00924 kinase [EC:2.7.1.-] | (RefSeq) probable receptor-like protein kinase At3g55450 isoform X1 (A)	-0.0103856	0.0106115	0.014848
gene-LOC110728215	--	0.00899597	-0.0118124	0.0148479
gene-LOC110681602	K03686 molecular chaperone DnaJ | (RefSeq) chaperone protein dnaJ A7A, chloroplastic-like isoform X1 (A)	0.00452944	0.0141394	0.0148471
gene-LOC110713441	--	-0.000935935	0.0148174	0.0148469
gene-LOC110720433	K04123 ent-kaurenoic acid monooxygenase [EC:1.14.14.107] | (RefSeq) ent-kaurenoic acid oxidase 2-like (A)	0.0143525	-0.00379537	0.0148459
gene-LOC110724659	K21971 methyltransferase NSUN6 [EC:2.1.1.-] | (RefSeq) putative methyltransferase NSUN6 (A)	0.0127422	-0.00761601	0.0148448
gene-LOC110704509	K19476 vacuolar protein sorting-associated protein IST1 | (RefSeq) IST1 homolog (A)	-0.00264032	0.0146075	0.0148442
gene-LOC110689435	K12119 cryptochrome 2 | (RefSeq) cryptochrome-1-like (A)	-0.0112245	0.00970616	0.0148391
gene-LOC110710475	--	0.0128554	-0.00741176	0.014839
gene-LOC110682368	K14487 auxin responsive GH3 gene family | (RefSeq) probable indole-3-acetic acid-amido synthetase GH3.1 isoform X1 (A)	-0.0062912	0.0134371	0.0148369
gene-LOC110707122	--	0.00713838	0.0129989	0.01483
gene-LOC110693594	K11838 ubiquitin carboxyl-terminal hydrolase 7 [EC:3.4.19.12] | (RefSeq) hypothetical protein (A)	0.0110889	0.00984614	0.0148294
gene-LOC110727335	K22262 WD repeat and FYVE domain-containing protein 3 | (RefSeq) protein SPIRRIG (A)	-0.00250582	0.0146155	0.0148288
gene-LOC110689061	--	0.0144857	-0.00316271	0.0148269
gene-LOC110713230	K22262 WD repeat and FYVE domain-containing protein 3 | (RefSeq) protein SPIRRIG (A)	0.00188009	0.0147064	0.0148261
gene-LOC110716628	K13356 alcohol-forming fatty acyl-CoA reductase [EC:1.2.1.84] | (RefSeq) fatty acyl-CoA reductase 3-like (A)	-0.00836391	0.0122412	0.0148257
gene-LOC110706411	--	-0.0106948	0.0102647	0.0148237
gene-LOC110708526	K21776 protein lin-54 | (RefSeq) Lin-54-like protein (A)	0.0128753	-0.0073457	0.0148234
gene-LOC110714881	--	0.0140864	0.00461346	0.0148226
gene-LOC110692416	--	0.0110843	0.00983985	0.0148217
gene-LOC110715919	K07052 uncharacterized protein | (RefSeq) uncharacterized protein LOC110715919 (A)	0.00418164	-0.0142196	0.0148217
gene-LOC110714788	K14432 ABA responsive element binding factor | (RefSeq) ABSCISIC ACID-INSENSITIVE 5-like protein 2 (A)	0.0140657	0.00467078	0.0148209
gene-LOC110684207	--	0.00628117	-0.0134222	0.0148192
gene-LOC110725957	--	-0.00516545	0.0138893	0.0148187
gene-LOC110723200	K01859 chalcone isomerase [EC:5.5.1.6] | (RefSeq) probable chalcone--flavonone isomerase 3 (A)	0.0091338	-0.0116691	0.0148187
gene-LOC110711451	--	0.0109039	0.0100296	0.0148152
gene-LOC110726262	K22733 magnesium transporter | (RefSeq) uncharacterized protein LOC102612526 (A)	0.0090487	0.0117258	0.0148113
gene-LOC110727428	--	0.0115513	0.00926985	0.0148109
gene-LOC110704012	--	0.0134327	0.00623876	0.0148108
gene-LOC110691253	K19476 vacuolar protein sorting-associated protein IST1 | (RefSeq) hypothetical protein (A)	0.000467626	0.0147994	0.0148068
gene-LOC110738439	K18065 Cdc25 family phosphatase [EC:3.1.3.48 1.20.4.1] | (RefSeq) dual specificity phosphatase Cdc25-like (A)	0.0143004	0.00383179	0.0148049
gene-LOC110693647	--	-0.0105325	0.0104012	0.0148026
gene-LOC110738172	K22696 protein-lysine N-methyltransferase EEF2KMT [EC:2.1.1.-] | (RefSeq) uncharacterized protein LOC108202480 isoform X1 (A)	-0.00486669	0.0139776	0.0148006
gene-LOC110682011	K23877 xyloglucan O-acetyltransferase | (RefSeq) protein ALTERED XYLOGLUCAN 4-like isoform X1 (A)	-0.00748973	0.012763	0.0147983
gene-LOC110700120	K02493 release factor glutamine methyltransferase [EC:2.1.1.297] | (RefSeq) uncharacterized protein LOC110700120 (A)	0.00957386	-0.0112835	0.0147979
gene-LOC110701207	K12608 CCR4-NOT complex subunit CAF16 | (RefSeq) ABC transporter I family member 20-like (A)	0.0140283	-0.00470721	0.014797
gene-LOC110711048	K20456 oxysterol-binding protein 1 | (RefSeq) oxysterol-binding protein-like protein (A)	0.0032349	0.0144385	0.0147964
gene-LOC110682507	K00430 peroxidase [EC:1.11.1.7] | (RefSeq) peroxidase 27-like (A)	-0.010049	0.0108599	0.014796
gene-LOC110730261	K19525 vacuolar protein sorting-associated protein 13A/C | (RefSeq) uncharacterized protein LOC110730261 isoform X1 (A)	-0.00704643	0.0130102	0.0147959
gene-LOC110712515	--	-0.0112001	0.00966591	0.0147943
gene-LOC110721902	--	-0.000731375	0.0147756	0.0147936
gene-LOC110717449	K01061 carboxymethylenebutenolidase [EC:3.1.1.45] | (RefSeq) endo-1,3;1,4-beta-D-glucanase (A)	-0.00862726	0.0120166	0.0147929
gene-LOC110717749	--	0.00860861	-0.0120299	0.0147928
gene-LOC110716767	--	0.0114951	0.00930976	0.0147922
gene-LOC110712785	--	-0.00925725	-0.011535	0.0147903
gene-LOC110730538	K13117 ATP-dependent RNA helicase DDX35 [EC:3.6.4.13] | (RefSeq) probable pre-mRNA-splicing factor ATP-dependent RNA helicase DEAH9 (A)	0.00165063	0.0146927	0.0147851
gene-LOC110692741	K10576 ubiquitin-conjugating enzyme E2 H [EC:2.3.2.23] | (RefSeq) ubiquitin-conjugating enzyme E2 5-like isoform X1 (A)	-0.00913436	0.0116176	0.0147786
gene-LOC110709179	--	-0.0101978	-0.0106963	0.0147785
gene-LOC110711547	--	-0.0124423	0.00797386	0.0147781
gene-LOC110682235	K05681 ATP-binding cassette, subfamily G (WHITE), member 2 | (RefSeq) hypothetical protein (A)	0.00585993	0.013566	0.0147775
gene-LOC110724847	K12197 charged multivesicular body protein 1 | (RefSeq) ESCRT-related protein CHMP1A (A)	-0.00699061	0.0130184	0.0147766
gene-LOC110704302	K00873 pyruvate kinase [EC:2.7.1.40] | (RefSeq) pyruvate kinase 1, cytosolic-like isoform X1 (A)	-0.00941568	0.0113874	0.014776
gene-LOC110694962	K21989 calcium permeable stress-gated cation channel | (RefSeq) CSC1-like protein At4g02900 (A)	0.00950119	0.0113138	0.0147741
gene-LOC110706104	--	0.0115268	-0.00923913	0.0147726
gene-LOC110708742	K21989 calcium permeable stress-gated cation channel | (RefSeq) CSC1-like protein RXW8 (A)	-0.00641659	-0.0133031	0.0147697
gene-LOC110716020	K22683 aspartyl protease family protein [EC:3.4.23.-] | (RefSeq) hypothetical protein (A)	-0.00756593	0.0126844	0.0147695
gene-LOC110734482	--	0.00885314	0.011821	0.0147687
gene-LOC110722467	--	0.0138559	0.0051105	0.0147683
gene-LOC110702862	K19476 vacuolar protein sorting-associated protein IST1 | (RefSeq) hypothetical protein (A)	-0.00683709	0.0130902	0.0147682
gene-LOC110716402	--	-0.00186549	0.0146492	0.0147675
gene-LOC110726707	K22455 estrogen receptor-binding fragment-associated gene 9 protein | (RefSeq) uncharacterized protein At3g61260-like (A)	0.00933744	0.0114368	0.0147644
gene-LOC110682469	K22262 WD repeat and FYVE domain-containing protein 3 | (RefSeq) protein SPIRRIG (A)	0.00231356	0.0145803	0.0147628
gene-LOC110716956	K14489 arabidopsis histidine kinase 2/3/4 (cytokinin receptor) [EC:2.7.13.3] | (RefSeq) histidine kinase 2-like (A)	0.00936946	0.0114045	0.0147598
gene-LOC110731951	--	0.0139814	0.00472835	0.0147593
gene-LOC110687981	--	0.0145225	-0.00263025	0.0147588
gene-LOC110686085	--	-0.00589823	-0.0135286	0.0147585
gene-LOC110730809	K19891 glucan endo-1,3-beta-glucosidase 1/2/3 [EC:3.2.1.39] | (RefSeq) glucan endo-1,3-beta-glucosidase 1-like (A)	0.0122888	0.00816947	0.0147565
gene-LOC110738045	K22262 WD repeat and FYVE domain-containing protein 3 | (RefSeq) protein SPIRRIG (A)	-0.00295093	0.0144577	0.0147558
gene-LOC110684298	K20359 PRA1 family protein 1 | (RefSeq) PRA1 family protein F3-like (A)	-0.00831551	0.0121891	0.0147554
gene-LOC110694400	K10418 dynein light chain LC8-type | (RefSeq) dynein light chain LC6, flagellar outer arm-like (A)	-0.00303781	0.0144385	0.0147546
gene-LOC110709409	K09419 heat shock transcription factor, other eukaryote | (RefSeq) heat stress transcription factor A-3-like isoform X1 (A)	-0.0085975	0.0119907	0.0147545
gene-LOC110727991	K02885 large subunit ribosomal protein L19e | (RefSeq) 60S ribosomal protein L19-2 (A)	0.00425927	0.014126	0.0147542
gene-LOC110716571	K00588 caffeoyl-CoA O-methyltransferase [EC:2.1.1.104] | (RefSeq) caffeoyl-CoA O-methyltransferase-like (A)	0.00990238	0.0109373	0.014754
gene-LOC110703637	--	0.0146108	0.00205019	0.0147539
gene-LOC110735310	K19073 divinyl chlorophyllide a 8-vinyl-reductase [EC:1.3.1.75] | (RefSeq) divinyl chlorophyllide a 8-vinyl-reductase, chloroplastic-like (A)	-0.0109591	0.00987758	0.0147536
gene-LOC110683389	K07375 tubulin beta | (RefSeq) tubulin beta-2 chain-like (A)	-0.00433129	0.0141034	0.0147535
gene-LOC110690486	K12135 zinc finger protein CONSTANS | (RefSeq) zinc finger protein CONSTANS-LIKE 2-like (A)	-0.00317021	0.0144084	0.0147531
gene-LOC110730673	--	0.0141381	0.00420625	0.0147505
gene-LOC110733614	K03511 DNA polymerase kappa [EC:2.7.7.7] | (RefSeq) DNA polymerase kappa (A)	-0.00561526	-0.0136393	0.01475
gene-LOC110723423	K18164 NADH dehydrogenase [ubiquinone] 1 alpha subcomplex assembly factor 7 | (RefSeq) protein arginine methyltransferase NDUFAF7 homolog, mitochondrial-like isoform X1 (A)	0.0109435	0.00988724	0.0147485
gene-LOC110724870	K05349 beta-glucosidase [EC:3.2.1.21] | (RefSeq) probable beta-glucosidase F (A)	0.00699365	0.0129825	0.0147464
gene-LOC110733347	K14684 solute carrier family 25 (mitochondrial phosphate transporter), member 23/24/25/41 | (RefSeq) mitochondrial substrate carrier family protein B-like isoform X1 (A)	-0.0035846	-0.0143041	0.0147464
gene-LOC110697347	--	-0.00977046	0.011045	0.0147463
gene-LOC110685190	K17607 type 2A phosphatase activator TIP41 | (RefSeq) TIP41-like protein (A)	0.0120378	0.00851305	0.0147438
gene-LOC110705404	K08790 serine/threonine kinase 38 [EC:2.7.11.1] | (RefSeq) serine/threonine-protein kinase tricorner-like isoform X1 (A)	-0.00288675	0.0144583	0.0147437
gene-LOC110731581	K12133 MYB-related transcription factor LHY | (RefSeq) uncharacterized protein LOC112280611 (A)	0.0137995	-0.0051833	0.0147408
gene-LOC110735754	--	0.0131758	0.00660864	0.0147403
gene-LOC110736870	K09753 cinnamoyl-CoA reductase [EC:1.2.1.44] | (RefSeq) cinnamoyl-CoA reductase 1-like (A)	-0.0124581	-0.00787249	0.014737
gene-LOC110686713	K03501 16S rRNA (guanine527-N7)-methyltransferase [EC:2.1.1.170] | (RefSeq) uncharacterized protein LOC110686713 (A)	-0.00403602	0.014171	0.0147345
gene-LOC110703219	K03255 protein TIF31 | (RefSeq) protein TSS-like isoform X1 (A)	0.0112837	-0.00947212	0.0147324
gene-LOC110690229	K08073 bifunctional polynucleotide phosphatase/kinase [EC:3.1.3.32 2.7.1.78] | (RefSeq) polynucleotide 3'-phosphatase ZDP-like (A)	0.00843101	0.0120814	0.0147323
gene-LOC110725217	--	0.00530736	-0.0137425	0.0147317
gene-LOC110732709	--	0.00492575	-0.0138824	0.0147304
gene-LOC110687779	K10949 ER lumen protein retaining receptor | (RefSeq) putative ER lumen protein-retaining receptor C28H8.4 (A)	-0.0129359	-0.00704421	0.0147295
gene-LOC110714022	--	-0.00894933	0.011699	0.0147295
gene-LOC110700610	K20628 expansin | (RefSeq) expansin-A1 (A)	0.0107144	0.0101074	0.0147295
gene-LOC110737668	K00074 3-hydroxybutyryl-CoA dehydrogenase [EC:1.1.1.157] | (RefSeq) uncharacterized protein LOC110737668 (A)	0.000140246	0.0147286	0.0147293
gene-LOC110734367	--	0.000528374	0.014719	0.0147285
gene-LOC110683892	K14016 ubiquitin fusion degradation protein 1 | (RefSeq) uncharacterized protein LOC110683892 (A)	0.0110994	0.00968147	0.0147284
gene-LOC110725633	K01115 phospholipase D1/2 [EC:3.1.4.4] | (RefSeq) phospholipase D alpha 1-like (A)	-0.0122546	0.00816807	0.0147273
gene-LOC110705282	--	-0.0121958	0.00825562	0.0147273
gene-LOC110685088	K05391 cyclic nucleotide gated channel, plant | (RefSeq) cyclic nucleotide-gated ion channel 1-like (A)	-0.00949168	0.0112604	0.0147272
gene-LOC110706460	--	-0.00902721	0.011636	0.0147271
gene-LOC110716811	K16283 E3 ubiquitin-protein ligase SDIR1 [EC:2.3.2.27] | (RefSeq) LOC109778685; E3 ubiquitin-protein ligase SDIR1 isoform X1 (A)	-0.00924717	0.0114619	0.014727
gene-LOC110717273	K10590 E3 ubiquitin-protein ligase TRIP12 [EC:2.3.2.26] | (RefSeq) E3 ubiquitin-protein ligase UPL4-like isoform X1 (A)	-0.00905163	0.0116168	0.0147269
gene-LOC110685170	--	-0.00965963	0.0111162	0.0147268
gene-LOC110736967	K07213 copper chaperone | (RefSeq) copper transport protein ATX1-like (A)	-0.00572507	0.0135676	0.014726
gene-LOC110702217	K08999 uncharacterized protein | (RefSeq) bifunctional nuclease 2-like (A)	-0.00982962	0.0109635	0.0147248
gene-LOC110695225	--	0.0101929	0.0106255	0.014724
gene-LOC110699719	--	-0.0109591	0.00983132	0.0147227
gene-LOC110682482	K14399 polyribonucleotide 5'-hydroxyl-kinase [EC:2.7.1.78] | (RefSeq) Clp1-domain-containing protein (A)	0.0123204	-0.00805775	0.0147214
gene-LOC110701211	--	0.00530555	0.0137321	0.0147214
gene-LOC110685509	K15362 fanconi anemia group J protein [EC:3.6.4.12] | (RefSeq) Fanconi anemia group J protein homolog (A)	0.0103753	0.0104433	0.0147211
gene-LOC110707068	K23877 xyloglucan O-acetyltransferase | (RefSeq) protein ALTERED XYLOGLUCAN 4-like (A)	0.0111259	0.00963928	0.0147208
gene-LOC110732882	--	-0.00420906	0.0141057	0.0147203
gene-LOC110684127	K00423 L-ascorbate oxidase [EC:1.10.3.3] | (RefSeq) L-ascorbate oxidase (A)	-0.00715373	0.0128627	0.0147182
gene-LOC110689187	K10268 F-box and leucine-rich repeat protein 2/20 | (RefSeq) F-box protein At3g58530-like (A)	0.0114093	-0.00929659	0.0147173
gene-LOC110709506	K13699 abhydrolase domain-containing protein 5 [EC:2.3.1.51] | (RefSeq) probable 1-acylglycerol-3-phosphate O-acyltransferase (A)	0.0142396	-0.00371332	0.0147158
gene-LOC110727051	K21594 translation factor GUF1, mitochondrial [EC:3.6.5.-] | (RefSeq) translation factor GUF1 homolog, mitochondrial-like (A)	0.00189727	0.0145927	0.0147155
gene-LOC110737917	K16075 magnesium transporter | (RefSeq) magnesium transporter MRS2-I-like (A)	-0.0119602	-0.00857184	0.0147147
gene-LOC110683351	K01176 alpha-amylase [EC:3.2.1.1] | (RefSeq) lectin-domain containing receptor kinase VI.3-like (A)	-0.0123437	0.00800876	0.0147142
gene-LOC110728900	--	-0.00072888	-0.014694	0.014712
gene-LOC110738853	K22547 arsenate reductase [EC:1.20.4.1] | (RefSeq) protein HIGH ARSENIC CONTENT 1, mitochondrial-like (A)	-0.0118418	0.00872437	0.0147086
gene-LOC110700848	--	0.00514723	-0.0137785	0.0147085
gene-LOC110684283	--	0.0127951	0.00724396	0.0147034
gene-LOC110706002	--	0.0127701	-0.00728783	0.0147034
gene-LOC110683493	K00655 1-acyl-sn-glycerol-3-phosphate acyltransferase [EC:2.3.1.51] | (RefSeq) uncharacterized protein LOC105166581 (A)	0.00275435	0.0144388	0.0146991
gene-LOC110697122	K22262 WD repeat and FYVE domain-containing protein 3 | (RefSeq) protein SPIRRIG (A)	0.00194367	0.0145695	0.0146986
gene-LOC110693659	K22262 WD repeat and FYVE domain-containing protein 3 | (RefSeq) protein SPIRRIG (A)	-0.00233446	0.0145086	0.0146953
gene-LOC110700743	--	0.00868779	-0.0118482	0.0146921
gene-LOC110718128	--	-0.00473878	-0.013905	0.0146903
gene-LOC110691949	K21843 tetratricopeptide repeat protein 7 | (RefSeq) protein NPG1-like (A)	-0.00834072	0.0120923	0.0146898
gene-LOC110725506	--	-0.00312945	0.0143517	0.014689
gene-LOC110718172	K14489 arabidopsis histidine kinase 2/3/4 (cytokinin receptor) [EC:2.7.13.3] | (RefSeq) histidine kinase 3-like (A)	0.00805065	0.0122827	0.014686
gene-LOC110701964	--	0.0138954	-0.00475064	0.0146851
gene-LOC110683080	--	0.0145013	0.00229907	0.0146824
gene-LOC110729861	K08712 ATP-binding cassette, subfamily G (WHITE), member 2, SNQ2 | (RefSeq) ABC transporter ATP-binding protein/permease PDR18-like (A)	-0.000499889	0.0146726	0.0146811
gene-LOC110717435	K10661 E3 ubiquitin-protein ligase MARCH6 [EC:2.3.2.27] | (RefSeq) probable E3 ubiquitin ligase SUD1 (A)	-0.0100526	0.0106961	0.0146786
gene-LOC110705353	K21596 calmodulin-binding transcription activator | (RefSeq) uncharacterized LOC107794376 (A)	0.002297	0.0144954	0.0146763
gene-LOC110728834	--	0.00866488	0.0118449	0.0146759
gene-LOC110696343	K14488 SAUR family protein | (RefSeq) probable cyclin-dependent serine/threonine-protein kinase DDB_G0292550 (A)	0.0130935	-0.00662763	0.0146753
gene-LOC110688432	--	0.01131	-0.00934951	0.0146741
gene-LOC110682373	K15688 E3 ubiquitin-protein ligase MUL1 [EC:2.3.2.27] | (RefSeq) E3 ubiquitin-protein ligase SPL2 (A)	-0.00778275	0.0124397	0.0146737
gene-LOC110708991	--	0.0142508	0.00348171	0.01467
gene-LOC110724875	K03798 cell division protease FtsH [EC:3.4.24.-] | (RefSeq) ATP-dependent zinc metalloprotease FTSH 6, chloroplastic (A)	0.000920589	0.0146408	0.0146697
gene-LOC110697073	K15338 flap endonuclease GEN [EC:3.1.-.-] | (RefSeq) flap endonuclease GEN-like 2 (A)	0.00718659	0.0127848	0.0146662
gene-LOC110684916	K17500 integrin-linked kinase-associated serine/threonine phosphatase 2C [EC:3.1.3.16] | (RefSeq) WAT1-related protein At3g18200 isoform X1 (A)	-0.010554	0.010183	0.0146656
gene-LOC110704481	K03452 magnesium/proton exchanger | (RefSeq) pentatricopeptide repeat-containing protein At3g62890-like (A)	-0.00220125	0.0144981	0.0146642
gene-LOC110700757	--	0.00885573	-0.0116842	0.014661
gene-LOC110739240	--	0.00836905	-0.0120362	0.0146598
gene-LOC110709640	K17506 protein phosphatase 1L [EC:3.1.3.16] | (RefSeq) probable protein phosphatase 2C 10 (A)	-0.00713089	0.0128084	0.0146597
gene-LOC110719622	K13145 integrator complex subunit 8 | (RefSeq) hypothetical protein (A)	-0.00579835	0.0134639	0.0146594
gene-LOC110682162	K08739 DNA mismatch repair protein MLH3 | (RefSeq) DNA mismatch repair protein MLH3-like isoform X1 (A)	0.00657046	0.0131041	0.014659
gene-LOC110726464	K22262 WD repeat and FYVE domain-containing protein 3 | (RefSeq) protein SPIRRIG (A)	-0.00693253	0.0129132	0.0146564
gene-LOC110689335	K10999 cellulose synthase A [EC:2.4.1.12] | (RefSeq) cellulose synthase A catalytic subunit 7 [UDP-forming]-like (A)	0.0117945	0.00869782	0.0146548
gene-LOC110712481	--	-0.00576175	0.0134681	0.0146488
gene-LOC110725462	--	0.00932874	0.0112936	0.0146482
gene-LOC110688509	--	-0.0125164	0.00760848	0.0146475
gene-LOC110686490	--	0.0145958	0.00122511	0.0146471
gene-LOC110714547	K12133 MYB-related transcription factor LHY | (RefSeq) uncharacterized protein LOC112280611 (A)	0.0106386	-0.0100674	0.0146469
gene-LOC110723390	--	-0.00127303	-0.0145909	0.0146463
gene-LOC110736122	--	0.00669423	0.0130265	0.0146459
gene-LOC110731814	K15365 RecQ-mediated genome instability protein 2 | (RefSeq) uncharacterized protein LOC110731814 (A)	0.00683546	0.0129529	0.0146459
gene-LOC110699947	K14486 auxin response factor | (RefSeq) auxin response factor 7-like isoform X1 (A)	0.0114451	0.00913839	0.0146458
gene-LOC110707481	--	0.0115721	0.00897432	0.0146442
gene-LOC110682506	K02201 pantetheine-phosphate adenylyltransferase [EC:2.7.7.3] | (RefSeq) phosphopantetheine adenylyltransferase (A)	-0.0112346	0.00939211	0.0146433
gene-LOC110714941	--	-0.000483676	0.0146342	0.0146422
gene-LOC110704828	--	0.00639133	0.013173	0.0146416
gene-LOC110702750	--	0.0106301	0.0100679	0.0146411
gene-LOC110700312	--	0.0132644	0.00619796	0.014641
gene-LOC110730181	--	-0.00179161	0.0145296	0.0146397
gene-LOC110719384	--	0.00705311	-0.0128274	0.0146386
gene-LOC110715363	K09571 FK506-binding protein 4/5 [EC:5.2.1.8] | (RefSeq) peptidyl-prolyl cis-trans isomerase FKBP62-like (A)	0.013281	-0.00614409	0.0146333
gene-LOC110697796	K14493 gibberellin receptor GID1 [EC:3.-.-.-] | (RefSeq) gibberellin receptor GID1B-like (A)	0.00446479	-0.0139338	0.0146316
gene-LOC110697506	K00161 pyruvate dehydrogenase E1 component alpha subunit [EC:1.2.4.1] | (RefSeq) pyruvate dehydrogenase E1 component subunit alpha-3, chloroplastic-like (A)	0.014248	-0.00332724	0.0146313
gene-LOC110721822	K13415 protein brassinosteroid insensitive 1 [EC:2.7.10.1 2.7.11.1] | (RefSeq) systemin receptor SR160 (A)	0.0135385	0.00554806	0.0146312
gene-LOC110685809	--	-0.00880801	0.0116817	0.0146302
gene-LOC110708501	--	-0.0101913	0.0104954	0.0146293
gene-LOC110699234	K19090 CRISPR-associated protein Cas5t | (RefSeq) putative pentatricopeptide repeat-containing protein At3g05240 (A)	0.00161921	0.0145383	0.0146282
gene-LOC110701719	K13425 WRKY transcription factor 22 | (RefSeq) WRKY transcription factor 22-like (A)	-0.00239491	0.0144297	0.0146271
gene-LOC110717490	K01051 pectinesterase [EC:3.1.1.11] | (RefSeq) pectinesterase-like (A)	-0.00997869	0.0106908	0.0146242
gene-LOC110735689	--	-0.0024442	0.0144139	0.0146197
gene-LOC110711301	--	-0.00717719	-0.0127359	0.014619
gene-LOC110726971	K19613 leucine-rich repeat protein SHOC2 | (RefSeq) NBS-LRR resistance protein (A)	-0.00444211	0.0139271	0.0146183
gene-LOC110731308	K22262 WD repeat and FYVE domain-containing protein 3 | (RefSeq) protein SPIRRIG (A)	-0.00358922	0.0141693	0.0146168
gene-LOC110724216	--	0.0139869	0.00424423	0.0146167
gene-LOC110718621	K18163 NADH dehydrogenase [ubiquinone] 1 alpha subcomplex assembly factor 6 | (RefSeq) NADH dehydrogenase (ubiquinone) complex I, assembly factor 6-like (A)	-0.00249313	0.0144015	0.0146157
gene-LOC110721261	--	0.0106717	0.0099863	0.0146155
gene-LOC110723572	--	-0.00203127	0.014472	0.0146138
gene-LOC110691141	--	0.0103749	0.0102873	0.0146105
gene-LOC110738807	K15078 structure-specific endonuclease subunit SLX1 [EC:3.6.1.-] | (RefSeq) putative disease resistance protein RGA3 (A)	0.00120237	0.0145606	0.0146102
gene-LOC110698466	--	0.00530195	-0.0136134	0.0146094
gene-LOC110729816	--	0.0067454	0.0129579	0.0146085
gene-LOC110684625	K19891 glucan endo-1,3-beta-glucosidase 1/2/3 [EC:3.2.1.39] | (RefSeq) hypothetical protein (A)	-0.00635447	0.0131519	0.0146066
gene-LOC110682557	K14191 18S rRNA (adenine1779-N6/adenine1780-N6)-dimethyltransferase [EC:2.1.1.183] | (RefSeq) ribosomal RNA small subunit methyltransferase, mitochondrial-like (A)	0.000529055	0.0145959	0.0146055
gene-LOC110711664	K08235 xyloglucan:xyloglucosyl transferase [EC:2.4.1.207] | (RefSeq) xyloglucan endotransglucosylase/hydrolase protein 24-like (A)	0.000412427	0.0145996	0.0146055
gene-LOC110731534	--	0.0127459	0.00713088	0.014605
gene-LOC110699674	--	0.00917288	0.0113632	0.0146036
gene-LOC110729197	--	-0.011153	0.00942648	0.014603
gene-LOC110716734	K10528 hydroperoxide lyase [EC:4.1.2.-] | (RefSeq) fatty acid hydroperoxide lyase, chloroplastic (A)	-0.0125121	0.00752832	0.0146023
gene-LOC110693928	K09060 plant G-box-binding factor | (RefSeq) G-box-binding factor 3-like isoform X1 (A)	0.0135161	-0.0055247	0.0146016
gene-LOC110740104	K13473 chitin elicitor-binding protein | (RefSeq) uncharacterized protein LOC100384051 precursor (A)	-0.00345911	0.0141854	0.0146011
gene-LOC110693194	--	0.0145874	0.000619365	0.0146005
gene-LOC110726964	K10260 F-box and WD-40 domain protein 7 | (RefSeq) WD40/YVTN repeat-like-containing domain (A)	0.00979759	0.0108249	0.0146004
gene-LOC110734414	K10268 F-box and leucine-rich repeat protein 2/20 | (RefSeq) F-box/LRR-repeat protein 12-like isoform X1 (A)	0.00936081	0.011202	0.0145983
gene-LOC110686737	--	-0.00690795	-0.0128553	0.0145938
gene-LOC110734481	--	0.00232786	0.0144048	0.0145917
gene-LOC110704472	K04564 superoxide dismutase, Fe-Mn family [EC:1.15.1.1] | (RefSeq) superoxide dismutase [Mn], mitochondrial-like (A)	-0.00816851	-0.0120903	0.0145911
gene-LOC110717948	--	0.0133709	-0.00583562	0.0145889
gene-LOC110700256	K13691 pathogen-inducible salicylic acid glucosyltransferase [EC:2.4.1.-] | (RefSeq) UDP-glycosyltransferase 74G1-like (A)	0.00893235	-0.0115338	0.0145882
gene-LOC110708684	K10364 capping protein (actin filament) muscle Z-line, alpha | (RefSeq) F-actin-capping protein subunit alpha-like (A)	0.0134921	0.00554564	0.0145874
gene-LOC110691409	K01188 beta-glucosidase [EC:3.2.1.21] | (RefSeq) beta-glucosidase 12-like (A)	-0.00379539	0.014084	0.0145864
gene-LOC110724693	K20617 cytochrome P450 family 71 subfamily A | (Kazusa) Lj3g3v1475790.2; - (A)	0.00438052	0.0139118	0.0145852
gene-LOC110729970	--	-0.00892644	0.0115322	0.0145833
gene-LOC110717925	K15271 ATP-dependent DNA helicase HFM1/MER3 [EC:3.6.4.12] | (RefSeq) DExH-box ATP-dependent RNA helicase DExH17 (A)	-0.0024807	0.0143707	0.0145832
gene-LOC110708341	--	-0.00769366	0.0123878	0.0145825
gene-LOC110729673	K14397 cleavage and polyadenylation specificity factor subunit 5 | (RefSeq) pre-mRNA cleavage factor Im 25 kDa subunit 2-like (A)	0.00766771	0.0124038	0.0145825
gene-LOC110686057	--	0.0143199	0.0027511	0.0145817
gene-LOC110697263	--	0.0104123	0.0102075	0.0145811
gene-LOC110685537	--	0.00821316	-0.012045	0.0145787
gene-LOC110738663	K21552 methyl halide transferase [EC:2.1.1.165] | (RefSeq) probable thiol methyltransferase 2 isoform X1 (A)	-0.0143054	0.00280671	0.0145781
gene-LOC110715195	--	0.0142691	0.00297571	0.0145761
gene-LOC110737140	K00700 1,4-alpha-glucan branching enzyme [EC:2.4.1.18] | (RefSeq) hypothetical protein (A)	0.0127835	0.00700163	0.0145754
gene-LOC110715476	--	0.00799937	0.0121792	0.0145713
gene-LOC110708203	--	3.76295e-05	0.014569	0.0145691
gene-LOC110735649	K00924 kinase [EC:2.7.1.-] | (RefSeq) receptor protein kinase CLAVATA1-like (A)	0.00799035	0.0121822	0.0145689
gene-LOC110739537	K06883 uncharacterized protein | (RefSeq) LOW QUALITY PROTEIN: uncharacterized protein LOC104799061 (A)	0.0132604	-0.00603063	0.0145673
gene-LOC110734250	K13508 glycerol-3-phosphate acyltransferase [EC:2.3.1.15 2.3.1.198] | (RefSeq) probable glycerol-3-phosphate acyltransferase 3 (A)	-0.00598825	0.0132785	0.0145663
gene-LOC110735358	--	0.00932914	0.0111843	0.0145644
gene-LOC110706231	--	0.0122311	0.00790328	0.0145623
gene-LOC110696059	K01177 beta-amylase [EC:3.2.1.2] | (RefSeq) beta-amylase 1, chloroplastic-like (A)	0.00189964	-0.0144379	0.0145623
gene-LOC110700140	K19996 phosphatidylinositol transfer protein SFH5 | (RefSeq) patellin-3 (A)	0.00404464	0.0139888	0.0145618
gene-LOC110703421	K01495 GTP cyclohydrolase IA [EC:3.5.4.16] | (RefSeq) GTP cyclohydrolase 1-like (A)	0.00506409	-0.0136517	0.0145607
gene-LOC110689359	K02729 20S proteasome subunit alpha 5 [EC:3.4.25.1] | (RefSeq) proteasome subunit alpha type-5 (A)	0.0145239	0.0010239	0.01456
gene-LOC110696094	K14490 histidine-containing phosphotransfer peotein | (RefSeq) LOW QUALITY PROTEIN: histidine-containing phosphotransfer protein 1-like (A)	-0.0123911	-0.00764211	0.0145582
gene-LOC110737028	K03327 multidrug resistance protein, MATE family | (RefSeq) protein DETOXIFICATION 16-like (A)	-0.00689263	0.0128222	0.0145574
gene-LOC110690654	K01728 pectate lyase [EC:4.2.2.2] | (RefSeq) probable pectate lyase 5 (A)	-0.00663727	0.0129562	0.0145574
gene-LOC110685219	K23541 Ca2+/H+ antiporter, TMEM165/GDT1 family | (RefSeq) pentatricopeptide repeat-containing protein At2g03880, mitochondrial (A)	-0.00784665	0.0122612	0.014557
gene-LOC110726186	K05349 beta-glucosidase [EC:3.2.1.21] | (RefSeq) probable beta-glucosidase F (A)	0.00169642	0.0144577	0.0145569
gene-LOC110702468	--	-0.0105558	0.0100236	0.0145567
gene-LOC110717349	K08832 serine/threonine-protein kinase SRPK3 [EC:2.7.11.1] | (RefSeq) SRSF protein kinase 3-like (A)	-0.0103083	0.010277	0.0145561
gene-LOC110731182	--	-0.00695025	0.012789	0.0145555
gene-LOC110690732	K03671 thioredoxin 1 | (RefSeq) thioredoxin H-type-like (A)	-0.00647019	0.0130367	0.014554
gene-LOC110687357	--	-0.00280001	-0.0142819	0.0145537
gene-LOC110718218	--	-0.00759475	-0.0124146	0.0145534
gene-LOC110714600	K17679 ATP-dependent RNA helicase MSS116, mitochondrial [EC:3.6.4.13] | (RefSeq) hypothetical protein (A)	-0.00105393	0.0145151	0.0145533
gene-LOC110731529	--	-0.000886942	0.0145261	0.0145531
gene-LOC110737451	--	0.0127909	-0.00694147	0.0145531
gene-LOC110694873	--	0.0144287	0.0018802	0.0145507
gene-LOC110726387	K14440 SWI/SNF-related matrix-associated actin-dependent regulator of chromatin subfamily A-like protein 1 [EC:3.6.4.12] | (RefSeq) SWI/SNF-related matrix-associated actin-dependent regulator of chromatin subfamily A-like protein 1 (A)	0.0101056	0.0104674	0.0145495
gene-LOC110688741	--	0.0110506	0.00946331	0.0145489
gene-LOC110684068	K10355 actin, other eukaryote | (RefSeq) actin-66-like (A)	0.00138676	-0.0144816	0.0145479
gene-LOC110716702	--	0.0134623	0.00551326	0.0145475
gene-LOC110695066	K03549 KUP system potassium uptake protein | (RefSeq) probable potassium transporter 17 isoform X1 (A)	-0.0123283	0.00772246	0.0145473
gene-LOC110727261	--	0.0145189	-0.000876829	0.0145453
gene-LOC110738057	K03017 DNA-directed RNA polymerase II subunit RPB9 | (RefSeq) DNA-directed RNA polymerases II, IV and V subunit 9B-like (A)	0.00663812	0.0129407	0.0145439
gene-LOC110693992	K08235 xyloglucan:xyloglucosyl transferase [EC:2.4.1.207] | (RefSeq) xyloglucan endotransglucosylase/hydrolase protein 9-like (A)	-0.0051375	0.0136019	0.0145398
gene-LOC110682221	--	0.0126421	0.00718194	0.0145397
gene-LOC110733988	--	0.0144264	-0.00179177	0.0145372
gene-LOC110726902	K15281 solute carrier family 35 | (RefSeq) UDP-galactose/UDP-glucose transporter 7-like (A)	0.00791579	0.0121876	0.0145327
gene-LOC110720603	--	0.0114104	-0.00899801	0.0145314
gene-LOC110728315	--	-0.00536394	0.0135038	0.0145302
gene-LOC110735698	K00924 kinase [EC:2.7.1.-] | (RefSeq) aspartic proteinase-like protein 2 (A)	0.00522744	0.0135521	0.0145254
gene-LOC110700451	K21989 calcium permeable stress-gated cation channel | (RefSeq) CSC1-like protein RXW8 (A)	0.0129602	0.00655345	0.0145229
gene-LOC110689864	--	-0.0113391	0.00907114	0.0145211
gene-LOC110737275	K20855 beta-1,3-galactosyltransferase 1/2/3/4/5/7/8 [EC:2.4.1.-] | (RefSeq) probable beta-1,3-galactosyltransferase 2 (A)	-0.0083865	-0.0118537	0.0145204
gene-LOC110738929	--	-0.00249944	0.0143037	0.0145204
gene-LOC110734057	K22262 WD repeat and FYVE domain-containing protein 3 | (RefSeq) protein SPIRRIG (A)	-0.0106123	0.00990907	0.0145193
gene-LOC110702130	K11996 adenylyltransferase and sulfurtransferase [EC:2.7.7.80 2.8.1.11] | (RefSeq) adenylyltransferase and sulfurtransferase MOCS3-like (A)	-0.0120264	0.00813477	0.0145192
gene-LOC110708995	--	0.00751302	0.0124236	0.0145186
gene-LOC110736958	K20558 transcription factor SPEECHLESS | (RefSeq) transcription factor SPEECHLESS-like (A)	0.0137298	0.0047182	0.0145179
gene-LOC110700257	K13416 brassinosteroid insensitive 1-associated receptor kinase 1 [EC:2.7.10.1 2.7.11.1] | (RefSeq) BRASSINOSTEROID INSENSITIVE 1-associated receptor kinase 1-like (A)	-0.00742906	0.012473	0.0145178
gene-LOC110721215	K01757 strictosidine synthase [EC:4.3.3.2] | (RefSeq) protein STRICTOSIDINE SYNTHASE-LIKE 11-like (A)	-0.00996982	0.0105523	0.0145172
gene-LOC110721608	K14638 solute carrier family 15 (peptide/histidine transporter), member 3/4 | (RefSeq) protein NRT1/ PTR FAMILY 7.3-like (A)	-0.0124819	0.00741031	0.0145159
gene-LOC110695413	K05643 ATP-binding cassette, subfamily A (ABC1), member 3 | (RefSeq) ABC transporter A family member 1 isoform X1 (A)	0.00326089	0.0141449	0.0145159
gene-LOC110705001	--	0.00668284	0.0128838	0.0145138
gene-LOC110713950	K23334 Ran-binding protein 9/10 | (RefSeq) ran-binding protein 10-like (A)	-0.0105324	-0.00998471	0.014513
gene-LOC110708267	--	0.00795948	0.0121351	0.0145125
gene-LOC110706904	K11968 ariadne-1 [EC:2.3.2.31] | (RefSeq) probable E3 ubiquitin-protein ligase ARI2 (A)	0.000293542	0.0145095	0.0145125
gene-LOC110698029	--	0.00898124	0.0113991	0.0145122
gene-LOC110700589	K00799 glutathione S-transferase [EC:2.5.1.18] | (RefSeq) glutathione S-transferase U9-like (A)	-0.00970432	0.0107902	0.0145121
gene-LOC110736961	K10664 E3 ubiquitin-protein ligase ATL6/9/15/31/42/55 [EC:2.3.2.27] | (RefSeq) E3 ubiquitin-protein ligase ATL31-like (A)	-0.00593258	0.0132435	0.0145116
gene-LOC110698468	--	0.0102767	-0.010243	0.0145097
gene-LOC110714387	K03452 magnesium/proton exchanger | (RefSeq) uncharacterized LOC18613571 (A)	-0.00359972	0.0140551	0.0145087
gene-LOC110721678	--	0.0118182	0.00841396	0.0145074
gene-LOC110739515	K04079 molecular chaperone HtpG | (RefSeq) F-box/kelch-repeat protein At3g06240-like isoform X1 (A)	0.0130806	0.00627363	0.0145072
gene-LOC110685850	K00430 peroxidase [EC:1.11.1.7] | (RefSeq) peroxidase 72-like (A)	0.00867274	-0.0116293	0.0145071
gene-LOC110721900	K16297 serine carboxypeptidase-like clade II [EC:3.4.16.-] | (RefSeq) serine carboxypeptidase II-2-like (A)	-0.00948809	0.0109704	0.0145043
gene-LOC110730100	K10745 ribonuclease H2 subunit C | (RefSeq) ribonuclease H2 subunit C-like (A)	0.0100385	0.0104684	0.0145038
gene-LOC110722330	K00943 dTMP kinase [EC:2.7.4.9] | (RefSeq) thymidylate kinase-like isoform X1 (A)	0.00931387	0.0111161	0.0145023
gene-LOC110723477	K15271 ATP-dependent DNA helicase HFM1/MER3 [EC:3.6.4.12] | (RefSeq) LOW QUALITY PROTEIN: DExH-box ATP-dependent RNA helicase DExH17 (A)	-0.00152362	0.0144217	0.0145019
gene-LOC110727679	--	0.0140694	-0.00350531	0.0144995
gene-LOC110718595	K03860 phosphatidylinositol glycan, class Q | (RefSeq) N-acetylglucosaminyl-phosphatidylinositol biosynthetic protein gpi1-like (A)	-0.00354493	0.0140581	0.0144982
gene-LOC110737432	K22262 WD repeat and FYVE domain-containing protein 3 | (RefSeq) protein SPIRRIG (A)	-0.00273665	0.014235	0.0144957
gene-LOC110701351	K17710 pentatricopeptide repeat domain-containing protein 1 | (RefSeq) pentatricopeptide repeat-containing protein At1g12300, mitochondrial-like (A)	0.0102085	0.0102892	0.0144942
gene-LOC110715930	K04482 DNA repair protein RAD51 | (RefSeq) DNA repair protein RAD51 homolog (A)	0.00783875	0.01219	0.0144928
gene-LOC110721477	K17964 leucine-rich PPR motif-containing protein, mitochondrial | (RefSeq) pentatricopeptide repeat-containing protein At5g61990, mitochondrial (A)	-0.00594865	0.0132157	0.0144928
gene-LOC110730404	K06694 26S proteasome non-ATPase regulatory subunit 10 | (RefSeq) 26S proteasome non-ATPase regulatory subunit 10 (A)	-0.0101506	0.0103443	0.0144927
gene-LOC110690369	--	-0.00908773	0.0112876	0.0144913
gene-LOC110691489	--	-0.000181013	0.01449	0.0144912
gene-LOC110715526	--	0.010712	0.00975622	0.014489
gene-LOC110734415	K17065 dynamin 1-like protein [EC:3.6.5.5] | (RefSeq) hypothetical protein (A)	-0.00791456	0.0121357	0.0144884
gene-LOC110710297	K09284 AP2-like factor, euAP2 lineage | (RefSeq) AP2-like ethylene-responsive transcription factor TOE3 isoform X1 (A)	0.0129272	-0.00654228	0.0144884
gene-LOC110700331	--	0.00893942	-0.0114008	0.0144876
gene-LOC110704761	--	-0.0111469	0.00925272	0.0144868
gene-LOC110712142	K08712 ATP-binding cassette, subfamily G (WHITE), member 2, SNQ2 | (RefSeq) ABC transporter ATP-binding protein/permease PDR18-like (A)	0.0106488	0.0098217	0.0144866
gene-LOC110712312	--	0.0069074	0.0127338	0.0144866
gene-LOC110708293	K13414 mitogen-activated protein kinase kinase kinase 1 [EC:2.7.11.25] | (RefSeq) uncharacterized protein LOC8063411 (A)	0.0143936	0.00163751	0.0144865
gene-LOC110712532	--	0.0130364	0.00631433	0.0144851
gene-LOC110721413	K13448 calcium-binding protein CML | (RefSeq) probable calcium-binding protein CML25 (A)	-0.0136485	0.00484922	0.0144844
gene-LOC110699305	K09286 EREBP-like factor | (RefSeq) ethylene-responsive transcription factor ABI4-like (A)	0.0119867	0.00813009	0.0144838
gene-LOC110692140	--	0.0137609	-0.00451345	0.0144822
gene-LOC110735043	--	0.01092	0.00951	0.0144805
gene-LOC110702626	--	0.00089724	-0.0144514	0.0144792
gene-LOC110687833	--	-0.0121151	-0.00792784	0.0144785
gene-LOC110708194	--	0.010398	0.0100749	0.0144783
gene-LOC110739505	K05863 solute carrier family 25 (mitochondrial adenine nucleotide translocator), member 4/5/6/31 | (RefSeq) ADP,ATP carrier protein-like (A)	0.0143705	0.00176108	0.014478
gene-LOC110711697	--	0.011939	0.00818699	0.0144764
gene-LOC110710361	K10744 ribonuclease H2 subunit B | (RefSeq) ribonuclease H2 subunit B-like (A)	0.0120873	0.00796496	0.0144756
gene-LOC110724950	K13525 transitional endoplasmic reticulum ATPase | (RefSeq) cell division cycle protein 48 homolog (A)	-0.0114109	0.00890554	0.0144747
gene-LOC110733325	K09753 cinnamoyl-CoA reductase [EC:1.2.1.44] | (RAP-DB) Os09g0262000; Similar to Cinnamoyl CoA reductase. (A)	0.00486091	-0.013633	0.0144737
gene-LOC110707693	--	0.00351278	0.0140349	0.0144678
gene-LOC110708338	K01381 saccharopepsin [EC:3.4.23.25] | (RefSeq) aspartic proteinase CDR1-like (A)	-0.00773872	0.0122236	0.0144673
gene-LOC110710456	K12446 L-arabinokinase [EC:2.7.1.46] | (RefSeq) L-arabinokinase isoform X1 (A)	-0.00749221	0.012375	0.0144663
gene-LOC110720148	K10880 DNA-repair protein XRCC3 | (RefSeq) DNA repair protein XRCC3 homolog (A)	-0.000213609	0.0144631	0.0144647
gene-LOC110719881	K02183 calmodulin | (RefSeq) calmodulin (A)	-0.00530613	0.0134537	0.0144623
gene-LOC110689014	K13201 nucleolysin TIA-1/TIAR | (RefSeq) oligouridylate-binding protein 1-like isoform X1 (A)	0.0142413	0.00251609	0.0144619
gene-LOC110687978	K01537 P-type Ca2+ transporter type 2C [EC:7.2.2.10] | (RefSeq) calcium-transporting ATPase 9, plasma membrane-type-like isoform X1 (A)	0.00967488	-0.0107459	0.0144595
gene-LOC110689306	K04715 ceramide kinase [EC:2.7.1.138] | (RefSeq) ceramide kinase-like isoform X1 (A)	-0.00330405	0.0140755	0.0144581
gene-LOC110735170	K03283 heat shock 70kDa protein 1/2/6/8 | (RefSeq) heat shock cognate 70 kDa protein 2-like (A)	0.00543586	-0.0133957	0.0144566
gene-LOC110690922	--	0.00320378	0.014095	0.0144546
gene-LOC110696022	K00128 aldehyde dehydrogenase (NAD+) [EC:1.2.1.3] | (RefSeq) aldehyde dehydrogenase family 3 member F1-like (A)	0.012361	-0.00749148	0.014454
gene-LOC110685995	--	0.00545588	0.0133838	0.0144531
gene-LOC110726514	K14638 solute carrier family 15 (peptide/histidine transporter), member 3/4 | (RefSeq) protein NRT1/ PTR FAMILY 2.13-like (A)	0.0144045	-0.00118221	0.014453
gene-LOC110684801	K13464 jasmonate ZIM domain-containing protein | (RefSeq) hypothetical protein (A)	0.013672	-0.00468524	0.0144525
gene-LOC110723834	K15104 solute carrier family 25 (mitochondrial oxoglutarate transporter), member 11 | (RefSeq) mitochondrial uncoupling protein 5-like (A)	0.00952532	0.0108662	0.0144501
gene-LOC110704800	K14003 prolactin regulatory element-binding protein | (RefSeq) SEC12-like protein 1 (A)	-0.0112908	0.00901751	0.0144499
gene-LOC110683155	K01609 indole-3-glycerol phosphate synthase [EC:4.1.1.48] | (RefSeq) indole-3-glycerol phosphate synthase, chloroplastic-like isoform X1 (A)	-0.0126393	-0.0070024	0.0144494
gene-LOC110694258	--	0.00162811	0.0143574	0.0144494
gene-LOC110738858	--	0.0010075	0.0144138	0.014449
gene-LOC110739600	--	-0.00815501	0.0119265	0.014448
gene-LOC110739447	--	-0.012524	0.00720365	0.0144479
gene-LOC110681827	K15333 tRNA guanosine-2'-O-methyltransferase [EC:2.1.1.34] | (RefSeq) uncharacterized protein LOC104224633 (A)	0.000186074	0.0144458	0.014447
gene-LOC110709123	--	0.00897353	0.0113217	0.0144466
gene-LOC110730379	K14948 polypyrimidine tract-binding protein 2 | (RefSeq) polypyrimidine tract-binding protein homolog 1-like (A)	0.00122811	0.0143943	0.0144466
gene-LOC110725215	--	0.00608089	0.0131042	0.0144464
gene-LOC110710927	--	0.00937204	0.0109933	0.0144461
gene-LOC110691140	--	0.0124563	0.00731188	0.0144438
gene-LOC110717620	K20802 (R)-mandelonitrile lyase [EC:4.1.2.10] | (RefSeq) MES5; methyl esterase 5 (A)	0.010611	0.00979878	0.0144433
gene-LOC110724166	--	-0.0114168	0.00884625	0.014443
gene-LOC110723830	K08081 tropinone reductase I [EC:1.1.1.206] | (RefSeq) tropinone reductase homolog At5g06060-like (A)	0.00120285	-0.0143928	0.014443
gene-LOC110713548	--	0.00765539	0.0122444	0.0144406
gene-LOC110730537	--	0.0113596	0.00891531	0.0144403
gene-LOC110718551	--	-0.0101798	0.010241	0.0144398
gene-LOC110684032	K14494 DELLA protein | (RefSeq) DELLA protein RGL1-like (A)	-0.00541811	0.0133843	0.0144393
gene-LOC110729763	K20888 xyloglucan galactosyltransferase MUR3 [EC:2.4.1.-] | (RefSeq) xyloglucan galactosyltransferase KATAMARI1 homolog (A)	0.00986698	-0.0105404	0.0144381
gene-LOC110719082	--	0.00859525	0.0115988	0.0144364
gene-LOC110695175	K10751 chromatin assembly factor 1 subunit B | (RefSeq) chromatin assembly factor 1 subunit FAS2-like (A)	0.0116265	0.00855639	0.0144356
gene-LOC110731371	--	0.0142145	0.00251564	0.0144354
gene-LOC110731867	K01728 pectate lyase [EC:4.2.2.2] | (RefSeq) probable pectate lyase 4 isoform X1 (A)	0.00602796	-0.0131146	0.0144336
gene-LOC110717751	K09422 transcription factor MYB, plant | (RefSeq) transcription factor MYB4-like (A)	-0.00718621	0.0125169	0.0144331
gene-LOC110716879	--	-0.00781247	0.0121343	0.0144318
gene-LOC110733856	--	0.0139124	0.00383344	0.0144309
gene-LOC110710732	K15100 solute carrier family 25 (mitochondrial citrate transporter), member 1 | (RefSeq) mitochondrial succinate-fumarate transporter 1-like (A)	0.0129927	-0.00627983	0.0144307
gene-LOC110689304	K01444 N4-(beta-N-acetylglucosaminyl)-L-asparaginase [EC:3.5.1.26] | (RefSeq) probable isoaspartyl peptidase/L-asparaginase 3 isoform X1 (A)	0.00488761	0.0135772	0.0144301
gene-LOC110739257	K04797 prefoldin alpha subunit | (RefSeq) uncharacterized protein LOC110716302 (A)	0.0144155	-0.000581765	0.0144272
gene-LOC110698531	K12189 ESCRT-II complex subunit VPS25 | (RefSeq) vacuolar protein sorting-associated protein 25-like isoform X3 (A)	-0.0113786	0.00886898	0.0144267
gene-LOC110719106	K17604 zinc finger SWIM domain-containing protein 3 | (RefSeq) protein FAR1-RELATED SEQUENCE 5-like (A)	-0.00933724	-0.0109975	0.0144267
gene-LOC110712265	K17499 protein phosphatase 1G [EC:3.1.3.16] | (RefSeq) probable protein phosphatase 2C 60 (A)	-0.00819183	0.0118749	0.0144264
gene-LOC110738987	K00031 isocitrate dehydrogenase [EC:1.1.1.42] | (RefSeq) isocitrate dehydrogenase [NADP] (A)	-0.0114493	0.00877622	0.0144259
gene-LOC110739659	K00008 L-iditol 2-dehydrogenase [EC:1.1.1.14] | (RefSeq) sorbitol dehydrogenase-like (A)	-0.00284595	-0.0141411	0.0144246
gene-LOC110708735	K22376 E3 ubiquitin-protein ligase KCMF1 [EC:2.3.2.27] | (RefSeq) protein DEHYDRATION-INDUCED 19 homolog 4-like (A)	-0.00827026	0.0118172	0.0144237
gene-LOC110724629	--	0.0136232	0.00473416	0.0144223
gene-LOC110729375	--	0.0117572	0.00835273	0.0144222
gene-LOC110736389	K16569 gamma-tubulin complex component 2 | (RefSeq) gamma-tubulin complex component 2-like (A)	0.00830173	0.0117932	0.0144222
gene-LOC110687705	K15503 serine/threonine-protein phosphatase 6 regulatory ankyrin repeat subunit B | (RefSeq) protein ACCELERATED CELL DEATH 6 (A)	-0.0038565	0.0138963	0.0144215
gene-LOC110713718	--	-0.0047788	0.0136066	0.0144214
gene-LOC110704174	K03549 KUP system potassium uptake protein | (RefSeq) potassium transporter 10-like isoform X1 (A)	-0.00911601	0.0111738	0.0144207
gene-LOC110699880	K11252 histone H2B | (RefSeq) probable histone H2B 4 (A)	0.0142799	-0.00200754	0.0144204
gene-LOC110723446	K14498 serine/threonine-protein kinase SRK2 [EC:2.7.11.1] | (RefSeq) serine/threonine-protein kinase SAPK1-like (A)	0.00353193	0.013981	0.0144202
gene-LOC110708388	K18327 RNA exonuclease 4 [EC:3.1.-.-] | (RefSeq) RNA exonuclease 4-like (A)	0.0111647	0.00912524	0.0144194
gene-LOC110699359	K00819 ornithine--oxo-acid transaminase [EC:2.6.1.13] | (RefSeq) ornithine aminotransferase, mitochondrial-like (A)	0.00582674	0.0131892	0.0144189
gene-LOC110720328	K09874 aquaporin NIP | (RefSeq) probable aquaporin NIP-type (A)	0.00854025	0.0116167	0.0144182
gene-LOC110727099	--	-0.00639897	0.0129203	0.0144181
gene-LOC110713933	--	0.00624355	-0.0129944	0.0144165
gene-LOC110686941	K17964 leucine-rich PPR motif-containing protein, mitochondrial | (RefSeq) hypothetical protein (A)	0.0011037	0.0143738	0.0144161
gene-LOC110720579	K04392 Ras-related C3 botulinum toxin substrate 1 | (RefSeq) rac-like GTP-binding protein 5 (A)	-0.00585901	0.013171	0.0144154
gene-LOC110703615	--	-0.00904642	0.0112231	0.0144151
gene-LOC110701299	K10615 E3 ubiquitin-protein ligase HERC4 [EC:2.3.2.26] | (RefSeq) probable E3 ubiquitin-protein ligase HERC4 isoform X1 (A)	-0.00897465	0.0112797	0.0144145
gene-LOC110715466	--	-0.00039202	-0.0144088	0.0144142
gene-LOC110693923	K13416 brassinosteroid insensitive 1-associated receptor kinase 1 [EC:2.7.10.1 2.7.11.1] | (RefSeq) hypothetical protein (A)	-0.0108104	0.00953289	0.0144132
gene-LOC110716273	K00873 pyruvate kinase [EC:2.7.1.40] | (RefSeq) pyruvate kinase, cytosolic isozyme (A)	-0.0126851	0.00684301	0.0144132
gene-LOC110727204	K23541 Ca2+/H+ antiporter, TMEM165/GDT1 family | (RefSeq) pentatricopeptide repeat-containing protein At5g04780, mitochondrial-like (A)	0.000652628	0.0143978	0.0144126
gene-LOC110738504	K13430 serine/threonine-protein kinase PBS1 [EC:2.7.11.1] | (RefSeq) serine/threonine-protein kinase CDL1 (A)	0.0102042	0.0101745	0.0144099
gene-LOC110736436	--	0.0037333	0.0139147	0.0144068
gene-LOC110718086	K01061 carboxymethylenebutenolidase [EC:3.1.1.45] | (RefSeq) endo-1,3;1,4-beta-D-glucanase-like isoform X1 (A)	0.0129267	0.00635793	0.0144056
gene-LOC110730598	--	0.0014131	0.0143362	0.0144056
gene-LOC110695959	K13418 somatic embryogenesis receptor kinase 1 [EC:2.7.10.1 2.7.11.1] | (RefSeq) LRR receptor kinase BAK1 (A)	-0.00988104	0.0104827	0.0144056
gene-LOC110698439	K13998 dihydrofolate reductase / thymidylate synthase [EC:1.5.1.3 2.1.1.45] | (RefSeq) bifunctional dihydrofolate reductase-thymidylate synthase 1-like isoform X1 (A)	0.00907003	0.0111912	0.0144052
gene-LOC110710854	--	0.00829235	-0.0117769	0.0144034
gene-LOC110728106	K12126 phytochrome-interacting factor 3 | (RefSeq) transcription factor PIF3-like isoform X1 (A)	-0.00363696	0.0139362	0.014403
gene-LOC110692313	K00469 inositol oxygenase [EC:1.13.99.1] | (RefSeq) inositol oxygenase 1-like (A)	-0.00406183	0.0138183	0.0144029
gene-LOC110690837	--	0.0128978	0.00640982	0.0144028
gene-LOC110731192	K19893 glucan endo-1,3-beta-glucosidase 5/6 [EC:3.2.1.39] | (RefSeq) glucan endo-1,3-beta-glucosidase-like protein (A)	-0.0104021	0.0099607	0.014402
gene-LOC110738438	K15691 E3 ubiquitin-protein ligase RFWD3 [EC:2.3.2.27] | (RefSeq) E3 ubiquitin-protein ligase RFWD3-like (A)	0.0130137	0.00616653	0.0144008
gene-LOC110699918	--	0.0140032	0.00335879	0.0144004
gene-LOC110738112	--	0.00580403	0.0131788	0.0144003
gene-LOC110719213	K15718 linoleate 9S-lipoxygenase [EC:1.13.11.58] | (RefSeq) probable linoleate 9S-lipoxygenase 5 (A)	-0.011635	0.00848403	0.0143997
gene-LOC110713823	--	0.00466191	0.0136238	0.0143993
gene-LOC110708390	--	0.00883297	0.0113704	0.0143981
gene-LOC110710589	--	-0.00802817	0.0119521	0.014398
gene-LOC110719330	--	-0.0118327	0.00820304	0.014398
gene-LOC110735220	--	0.000504178	0.014389	0.0143978
gene-LOC110698649	--	-0.0107491	0.00957683	0.0143965
gene-LOC110709177	K08244 alpha-glucan, water dikinase [EC:2.7.9.4] | (RefSeq) alpha-glucan water dikinase, chloroplastic-like (A)	-0.0118539	0.00816945	0.0143963
gene-LOC110721820	K18587 ubiquinone biosynthesis protein COQ9 | (RefSeq) ubiquinone biosynthesis protein COQ9, mitochondrial-like (A)	0.0116544	-0.0084494	0.014395
gene-LOC110715796	--	0.00249309	0.0141756	0.0143931
gene-LOC110721612	--	-0.00586549	-0.0131434	0.0143928
gene-LOC110683728	--	0.0143001	0.00160164	0.0143895
gene-LOC110707438	--	-0.00032879	0.014385	0.0143888
gene-LOC110714604	K14496 abscisic acid receptor PYR/PYL family | (RefSeq) abscisic acid receptor PYL8-like (A)	-0.01129	0.00891979	0.0143884
gene-LOC110733518	--	0.00352843	0.0139483	0.0143877
gene-LOC110691453	K08266 target of rapamycin complex subunit LST8 | (RefSeq) protein LST8 homolog (A)	0.013194	0.00572309	0.0143817
gene-LOC110701422	--	0.0123571	-0.00735684	0.0143813
gene-LOC110702134	K13420 LRR receptor-like serine/threonine-protein kinase FLS2 [EC:2.7.11.1] | (RAP-DB) Os04g0618700; Protein kinase, core domain containing protein. (A)	0.00902398	0.0111966	0.0143804
gene-LOC110695263	K23541 Ca2+/H+ antiporter, TMEM165/GDT1 family | (RefSeq) pentatricopeptide repeat-containing protein At5g04780, mitochondrial-like (A)	0.0037926	0.013871	0.0143801
gene-LOC110711483	K14972 PAX-interacting protein 1 | (RefSeq) mediator of RNA polymerase II transcription subunit 15a-like (A)	-0.0116772	0.00839172	0.0143798
gene-LOC110688379	--	-0.0103385	0.00999437	0.0143796
gene-LOC110720139	K05349 beta-glucosidase [EC:3.2.1.21] | (RefSeq) probable beta-glucosidase F (A)	-0.0111639	-0.00906289	0.0143795
gene-LOC110726835	--	0.0141376	-0.00262153	0.0143786
gene-LOC110695983	K10277 lysine-specific demethylase 8 [EC:1.14.11.27] | (RefSeq) lysine-specific demethylase JMJ30-like (A)	-0.00258784	0.0141438	0.0143786
gene-LOC110707935	K14638 solute carrier family 15 (peptide/histidine transporter), member 3/4 | (RefSeq) protein NRT1/ PTR FAMILY 8.1 isoform X2 (A)	0.000916968	-0.014349	0.0143782
gene-LOC110714290	K00521 ferric-chelate reductase [EC:1.16.1.7] | (RefSeq) ferric reduction oxidase 7, chloroplastic-like (A)	0.000148972	-0.0143772	0.0143779
gene-LOC110703305	K17604 zinc finger SWIM domain-containing protein 3 | (RefSeq) protein FAR-RED IMPAIRED RESPONSE 1-like (A)	0.0123227	0.00740701	0.0143775
gene-LOC110737410	--	0.0105591	-0.00975715	0.0143769
gene-LOC110720006	--	0.0133219	0.00540185	0.0143755
gene-LOC110683749	K15078 structure-specific endonuclease subunit SLX1 [EC:3.6.1.-] | (RefSeq) putative disease resistance protein RGA1 (A)	0.00549567	0.0132822	0.0143743
gene-LOC110738852	--	-0.00809059	0.0118807	0.0143739
gene-LOC110686649	K01968 3-methylcrotonyl-CoA carboxylase alpha subunit [EC:6.4.1.4] | (RefSeq) LOW QUALITY PROTEIN: methylcrotonoyl-CoA carboxylase subunit alpha, mitochondrial-like (A)	0.0142118	-0.00214823	0.0143733
gene-LOC110725762	--	0.00347826	-0.0139452	0.0143725
gene-LOC110727318	--	0.00532169	0.0133503	0.0143719
gene-LOC110740140	--	0.00827487	0.0117479	0.0143696
gene-LOC110685422	K09060 plant G-box-binding factor | (RefSeq) bZIP transcription factor 16-like (A)	-0.00981383	-0.0104959	0.0143692
gene-LOC110735216	--	0.00464281	0.013598	0.0143687
gene-LOC110691084	K15196 transcription factor IIIB 90 kDa subunit | (RefSeq) plant-specific TFIIB-related protein PTF2-like (A)	0.00812152	0.0118532	0.0143686
gene-LOC110735521	K00626 acetyl-CoA C-acetyltransferase [EC:2.3.1.9] | (RefSeq) acetyl-CoA acetyltransferase, cytosolic 1-like (A)	-0.0126158	-0.00687599	0.0143679
gene-LOC110720964	--	0.00944922	-0.0108227	0.0143673
gene-LOC110686686	--	0.0143476	-0.000731113	0.0143662
gene-LOC110736871	--	-0.0127211	-0.00666966	0.0143636
gene-LOC110696871	K05665 ATP-binding cassette, subfamily C (CFTR/MRP), member 1 [EC:7.6.2.3] | (RefSeq) ABC transporter C family member 2-like (A)	-0.0120227	-0.0078563	0.014362
gene-LOC110733176	--	-0.0065199	-0.0127964	0.0143616
gene-LOC110690092	--	0.0117662	0.00823345	0.0143608
gene-LOC110709249	--	0.00531915	0.0133388	0.0143603
gene-LOC110712800	--	-0.00892614	0.0112477	0.0143592
gene-LOC110724269	--	-0.0041905	0.0137278	0.0143531
gene-LOC110702744	K21989 calcium permeable stress-gated cation channel | (RefSeq) calcium permeable stress-gated cation channel 1-like (A)	-0.00673256	0.0126761	0.0143531
gene-LOC110723032	K22683 aspartyl protease family protein [EC:3.4.23.-] | (RefSeq) aspartyl protease family protein 2 (A)	-0.0127045	0.00667071	0.0143493
gene-LOC110711849	K17964 leucine-rich PPR motif-containing protein, mitochondrial | (RefSeq) hypothetical protein (A)	0.00186545	0.0142264	0.0143482
gene-LOC110690850	K12115 clock-associated PAS protein ZTL | (RefSeq) adagio protein 1-like (A)	-0.00907263	0.0111141	0.014347
gene-LOC110695295	--	0.000589143	0.014333	0.0143451
gene-LOC110731651	K04688 ribosomal protein S6 kinase beta [EC:2.7.11.1] | (RefSeq) serine/threonine-protein kinase AtPK1/AtPK6-like (A)	0.0106793	-0.00957771	0.014345
gene-LOC110710928	K23877 xyloglucan O-acetyltransferase | (RefSeq) protein ALTERED XYLOGLUCAN 4 (A)	0.00509374	0.01341	0.0143448
gene-LOC110731402	K06883 uncharacterized protein | (RefSeq) LOW QUALITY PROTEIN: uncharacterized protein LOC104799061 (A)	-0.006427	-0.0128225	0.014343
gene-LOC110686658	K03188 urease accessory protein | (RefSeq) uncharacterized protein LOC108224146 isoform X1 (A)	-0.0120044	0.0078485	0.0143424
gene-LOC110723216	--	-0.0118393	-0.00809422	0.0143417
gene-LOC110739245	--	0.00575671	0.0131356	0.0143416
gene-LOC110710195	K03063 26S proteasome regulatory subunit T3 | (RefSeq) 26S protease regulatory subunit 6B homolog (A)	-0.0085066	0.0115439	0.0143396
gene-LOC110689711	--	-0.0102523	0.0100235	0.014338
gene-LOC110681914	K03245 translation initiation factor 3 subunit J | (RefSeq) uncharacterized protein LOC110681914 (A)	0.0136053	0.0045209	0.0143368
gene-LOC110716932	--	0.0110741	0.00910503	0.0143365
gene-LOC110709130	K08956 AFG3 family protein [EC:3.4.24.-] | (RefSeq) ATP-dependent zinc metalloprotease FTSH 10, mitochondrial (A)	0.0143232	0.000610287	0.0143362
gene-LOC110707567	--	0.0137094	0.00419268	0.0143362
gene-LOC110683162	K13457 disease resistance protein RPM1 | (RefSeq) disease resistance protein RPM1 (A)	-0.00160047	0.0142436	0.0143332
gene-LOC110700249	K03549 KUP system potassium uptake protein | (RefSeq) potassium transporter 19-like (A)	-0.00303118	-0.0140077	0.0143319
gene-LOC110738863	K06180 23S rRNA pseudouridine1911/1915/1917 synthase [EC:5.4.99.23] | (RefSeq) pentatricopeptide repeat-containing protein At1g20230 isoform X1 (A)	0.00222295	0.0141561	0.0143295
gene-LOC110703955	K18801 glucuronoxylan 4-O-methyltransferase [EC:2.1.1.112] | (RefSeq) glucuronoxylan 4-O-methyltransferase 1 (A)	0.0143045	0.000840247	0.0143291
gene-LOC110734502	--	0.0141405	0.00231717	0.0143291
gene-LOC110734706	--	0.0133982	0.00507868	0.0143285
gene-LOC110696338	K15255 ATP-dependent DNA helicase PIF1 [EC:3.6.4.12] | (RefSeq) uncharacterized protein LOC110689508 (A)	0.0143141	0.00063601	0.0143282
[truncated: 14,834 more rows]
