# Supplementary material for: Elucidating the Differentiation Synthesis Mechanisms of Differently Colored Resistance Quinoa Seedings Using Metabolite Profiling and Transcriptome Analysis
Source: Metabolites. 2023 Oct 10;13(10):1065. doi: 10.3390/metabo13101065 (PMC10609267; doi:10.3390/metabo13101065)
Supplement: Supplementary file 1 [file metabolites-13-01065-s001.zip › Table S23.xlsx]

## Sheet: Sheet1
Table S23 O2PLS analysis (metabolome loading plot)
ID	Formula	compounds	loading 1	loading 2	length
Lmsp004166	C27H30O16	Quercetin-3-O-glucoside-7-O-rhamnoside	-0.03457	-0.0993254	0.105169
mws0059	C27H30O16	Quercetin-3-O-rutinoside (Rutin)	-0.0435983	-0.0897199	0.0997521
Lmjp002461	C27H30O16	Quercetin-3-O-neohesperidoside	-0.0372711	-0.0918449	0.0991192
Hmcp001618	C32H38O20	Quercetin-3-O-(2''-O-Xylosyl)rutinoside	-0.0237285	-0.0907634	0.0938138
Hmqp002870	C32H38O20	Luteolin-7-O-Sophoroside-5-O-arabinoside	0.0496942	0.075976	0.0907847
Lmsp003881	C33H40O19	Kaempferol-3-O-rutinoside-7-O-rhamnoside	0.0478664	0.0764233	0.0901761
pmp000087	C13H16O6	2-Feruloyl-sn-glycerol	0.0315684	-0.0831447	0.088936
HJAP061	C32H38O20	Quercetin-3-O-(2''-O-arabinosyl)rutinoside	-0.035303	-0.0814625	0.0887831
Zmlp003063	C33H40O19	Luteolin-7-O-(2''-O-rhamnosyl)rutinoside	0.0507365	0.0720194	0.0880965
mws0232	C17H20N4O6	Riboflavin (Vitamin B2)	-0.0179618	0.0855434	0.0874088
pmp000086	C13H16O6	1-Feruloyl-sn-glycerol	0.0297096	-0.0821459	0.0873533
pmb0789	C14H21NO8	Pyridoxine-5'-O-glucoside	0.0642215	0.0590368	0.0872339
Hmln000873	C13H16O10	2-O-Galloyl-D-glucose	0.0277081	-0.0813861	0.0859734
Zmcp003989	C27H30O15	Kaempferol-3-O-rhamnosyl(1→2)glucoside	0.0524671	0.0672549	0.0852996
Lmtp004044	C26H28O16	Quercetin-3-O-apiosyl(1→2)galactoside	-0.0597773	-0.0605101	0.0850577
Lmmp003091	C27H30O16	Quercetin-3-O-(4''-O-glucosyl)rhamnoside	-0.0140474	-0.0836816	0.0848525
pme3186	C3H7O6P	DL-Glyceraldehyde-3-phosphate	0.0107383	-0.0838417	0.0845266
pmb0608	C25H24O14	Chrysoeriol-7-O-(6''-malonyl)glucoside	0.0203962	0.0819969	0.0844955
mws0009	C10H10O3	Coniferaldehyde	-0.0340496	-0.0768895	0.0840914
mws0913	C21H20O11	Kaempferol-3-O-galactoside (Trifolin)	-0.000854307	-0.0839227	0.083927
Lmsn006130	C36H56O12	2α,3β,19α-Trihydroxyurs-12-en-23,28-dioic acid-28-O-glucoside	-0.0313337	-0.0778325	0.0839029
pme1228	C11H12N2O3	5-Hydroxy-L-tryptophan	-0.0377197	0.0746609	0.0836483
Hmpp003270	C21H20O11	Luteolin-4'-O-glucoside	0.0713264	0.0436363	0.0836157
Lmjp002596	C26H28O16	Quercetin-3-O-sambubioside	-0.059944	-0.0582251	0.083567
HJN041	C21H24O11	Epicatechin glucoside	0.0615287	-0.0557083	0.0830012
Lmdn001925	C26H34O12	Olivil-4'-O-glucoside	-0.0406674	0.0720562	0.0827402
HJAP127	C33H40O20	Quercetin-3-O-(2''-O-Rhamnosyl)rutinoside	-0.0592328	-0.0570937	0.0822691
pme0321	C21H20O10	Kaempferol-7-O-rhamnoside	0.0641539	0.0511222	0.0820317
pme3200	C2H7N3	1-methylguanidine	0.0594983	0.0559674	0.0816847
pmp001086	C6H6O3	5-Hydroxymethylfurfural	-0.0454555	0.0677251	0.0815653
mws1094	C15H12O6	Aromadendrin (Dihydrokaempferol)	0.0593161	0.0556302	0.081321
Lmlp003531	C21H20O11	Luteolin-3'-O-glucoside	0.0697738	0.0402304	0.0805411
pmn001518	C13H16O10	1-O-Galloyl-D-glucose	0.0286091	-0.0748614	0.0801418
Hmjp003008	C27H28O16	Luteolin-7-O-glucuronide-5-O-rhamnoside	0.051468	0.0609993	0.0798115
Zmxp005470	C26H26O15	Tricin-7-O-(6''-O-malonyl)glucoside	-0.0410861	0.0684034	0.0797941
Lmtn002796	C21H22O11	Aromadendrin-7-O-glucoside	0.0577923	0.0547782	0.0796279
pme3350	C10H13N5O5	8-Hydroxy-2-deoxyguanosine	-0.0286747	0.074178	0.0795275
pmn001370	C32H42O16	Pinoresinol-4,4'-O-di-O-glucoside	-0.0383042	0.0692451	0.0791334
mws1068	C15H10O6	Kaempferol (3,5,7,4'-Tetrahydroxyflavone)	0.0708004	0.0350871	0.0790177
mws2209	C21H20O11	Kaempferol-3-O-glucoside (Astragalin)	0.0670834	0.0412864	0.0787702
Hmjn004446	C30H26O13	Luteolin-7-O-(6''-caffeoyl)rhamnoside	0.0698322	0.0363457	0.0787245
Hmcp001329	C32H38O21	Quercetin-3-O-xylosyl(1→2)glucosyl(1→2)glucoside	-0.0545786	-0.0566386	0.0786559
pme1419	C6H13NO2S	L-Methionine methyl ester	0.0466329	-0.0628403	0.078253
Lmmn002179	C14H18O8	Methyl salicylate-2-O-glucoside	-0.0625549	0.046884	0.0781743
HJAP148	C26H28O15	Kaempferol-3-O-sambubioside	0.0451319	0.0635986	0.077985
mws0344	C5H10O6	D-Xylonic acid	0.0702581	0.0324665	0.0773968
Lmbp002336	C27H30O16	Quercetin-3-O-(2''-O-rhamnosyl)galactoside	-0.0661952	-0.040102	0.0773949
pme1002	C8H11NO	L-Tyramine	0.0104554	0.0766808	0.0773904
pme3472	C12H16O7	Arbutin	0.0682296	0.0361523	0.0772157
pmb3107	C15H20O10	Glucosyringic Acid	-0.0383443	0.0669155	0.0771231
pma0948	C8H11NO	Phenylethanolamine	0.0113208	0.0762012	0.0770376
Lmyp003588	C35H28O20	Quercetin-3-O-(2'',6''-digalloyl)-glucoside	-0.0575687	-0.0511523	0.0770111
pmb0676	C38H40O19	Chrysoeriol-8-C-glucoside-7-O-(6''-feruloyl)glucoside	0.00885289	0.0764764	0.0769871
Zmyn000083	C6H14O12P2	D-Glucose 1,6-bisphosphate	0.0219735	-0.0736308	0.0768397
pme2651	C21H28N7O17P3	NADP (Nicotinamide adenine dinucleotide phosphate)	0.0229435	-0.0732611	0.0767698
HJN054	C25H34O10	Secoisolariciresinol-9'-O-xyloside	-0.0359864	0.0677348	0.0767008
Lmhn003240	C11H10O6	Benzoylmalic acid	0.0589533	0.0490115	0.0766657
Hmyp002656	C11H11NO4	Methyl dioxindole-3-acetate	-0.0531743	0.0551569	0.0766146
Lmmp002560	C27H28O18	Quercetin-3-O-(2''-O-glucosyl)glucuronide	-0.0231528	-0.0728453	0.0764362
mws0704	C2H8NO4P	O-Phosphorylethanolamine	0.0207784	-0.0734537	0.076336
mws1078	C7H7NO2	Anthranilic Acid	0.0634044	-0.0422713	0.0762035
pme0170	C8H16N4O3	N-Acetyl-L-Arginine	-0.058113	0.0492746	0.0761913
mws0376	C4H4O4	Fumaric acid	0.0314904	0.0687179	0.0755897
mws4167	C21H18O12	Luteolin-7-O-glucuronide	0.0548288	0.0519435	0.075527
Lmmp003306	C25H26O15	Quercetin-3-O-xylosyl(1→2)arabinoside	-0.0457785	-0.0591969	0.0748328
pmn001368	C32H44O17	Olivil-4,4'-Di-O-glucoside	-0.0252113	0.0703935	0.074772
mws0260	C6H14N4O2	L-Arginine	0.0338312	-0.0665949	0.0746956
Lmmn003663	C14H18O9	5-Glucosyloxy-2-Hydroxybenzoic acid methyl ester	0.0674826	0.0317768	0.07459
pmp000596	C27H30O17	Quercetin-3-O-(2''-O-galactosyl)glucoside	-0.0515546	0.0538278	0.0745339
pma0134	C4H8O4	D-(-)-Threose	-0.000668289	0.0743562	0.0743592
Lmzn001894	C21H18O12	Kaempferol-3-O-glucuronide	0.0525801	0.0525737	0.074355
Lmmn003398	C23H22O12	Kaempferol-3-O-(6''-acetyl)glucoside	0.0483033	0.0563159	0.0741936
Lmmp003783	C21H18O13	Quercetin-3-O-glucuronide	-0.0463114	-0.0576835	0.0739739
pmp000593	C27H30O15	Luteolin-7-O-rutinoside*	0.0232437	0.0702256	0.0739723
pme0519	C12H22O11	D-Sucrose*	-0.0522748	-0.0520748	0.0737864
pme3193	C4H7NO3	N-Acetyl-L-glycine	-0.0191651	0.0708655	0.0734113
pme2117	C10H15N5O10P2	Adenosine 5'-diphosphate	0.0414459	-0.0604949	0.0733307
Lmfn003760	C21H18O13	Quercetin-4′-O-glucuronide	-0.00580687	-0.0729226	0.0731534
Hmjp003123	C21H18O13	Quercetin-5-O-glucuronide	0.000675577	-0.0730143	0.0730175
pmp000587	C24H22O14	Luteolin-7-O-(6''-malonyl)glucoside	0.0445933	0.0578071	0.0730084
Lmhp008233	C23H40NO7P	LysoPE 18:4	0.0662018	0.0307125	0.072979
Lmqp000329	C8H14N3O7P	5-Aminoimidazole ribonucleotide	0.064916	0.0327895	0.0727271
Lmdp004892	C24H22O14	Kaempferol-3-O-(6''-malonyl)galactoside	0.0585684	0.0430346	0.072679
mws0120	C8H20NO6P	Choline Alfoscerate	0.0636628	0.0350548	0.0726759
mws0242	C8H14O4	Suberic Acid	0.0657642	0.0307132	0.0725826
pmp001079	C27H30O15	Luteolin-7-O-neohesperidoside (Lonicerin)*	0.0205824	0.0695627	0.0725438
mws0924	C6H10O4	2-Methylglutaric acid*	0.0688894	0.0226991	0.0725327
HJAP023	C33H40O21	Kaempferol-6,8-di-C-glucoside-7-O-glucoside	-0.0487133	-0.0536735	0.0724833
pmb2319	C23H48NO7P	LysoPC 15:0	0.0710088	0.0136405	0.072307
pme0282	C8H6O4	Phthalic acid	0.0678495	-0.0248261	0.0722488
pmb0770	C20H20N2O4	N-Feruloylserotonin	-0.0174703	0.070075	0.0722199
Lmhp008718	C25H48NO7P	LysoPC 17:2	0.0650643	0.0312864	0.0721955
Lmbn001930	C7H6O2	2-Hydroxybenzaldehyde (Salicylaldehyde)	0.0611033	-0.0383808	0.0721575
mws0919	C21H20O10	Kaempferol-3-O-rhamnoside (Afzelin)	0.0716724	0.00826341	0.0721472
mws0208	C6H10O4	Adipic Acid*	0.0687312	0.0219169	0.072141
pme2380	C5H6O5	α-Ketoglutaric acid	0.0345629	-0.0631035	0.071949
Zmgn000447	C3H7O7P	3-Phospho-D-glyceric acid	0.00895516	-0.0713413	0.0719012
Lmbn001609	C6H10O4	2-Acetyl-2-Hydroxybutanoic Acid	0.0690228	0.0200985	0.0718894
pme0128	C6H12N2O3	L-Alanyl-L-Alanine	0.0214001	-0.0685086	0.0717732
Lmbp003668	C20H18O10	Kaempferol-3-O-arabinoside	0.0714279	0.00685526	0.0717561
mws0044	C15H12O7	Dihydroquercetin(Taxifolin)	-0.00875403	-0.0711191	0.0716559
Lmhn003373	C11H10O7	p-Hydroxybenzoylmalic acid	0.0651826	0.029428	0.0715177
pme1651	C10H9NO2	Indole 3-acetic acid (IAA)	0.0657537	-0.0276375	0.0713259
Zmhn004909	C21H18O13	3,4-Digalloylshikimic acid	-0.0170329	-0.0691225	0.0711902
pme0376	C15H12O5	Naringenin (5,7,4'-Trihydroxyflavanone)	0.0703031	0.0111274	0.0711782
pme0281	C8H6O4	Terephthalic acid	0.0686548	-0.0186805	0.0711508
pmb2795	C10H10O3	4-Methoxycinnamic acid*	0.0596617	-0.0385924	0.0710556
pmp000579	C22H22O11	Diosmetin-7-O-galactoside	0.00238027	-0.0708635	0.0709034
Zmzn000078	C3H7O6P	Dihydroxyacetone phosphate	0.0295957	-0.0643687	0.0708465
mws4175	C6H8O6	D-Glucurono-6,3-lactone	0.0187703	-0.0682874	0.0708202
Lmhp008440	C20H40NO7P	LysoPE 15:1	0.0644386	0.0292941	0.0707848
Lmtp001399	C14H17NO7	5,6-Dihydroxyindole-5-O-β-glucoside	0.0210951	-0.0675317	0.0707498
mws2213	C9H8O2	Cinnamic acid	-0.0201233	-0.0676736	0.0706021
pme2746	C27H33N9O15P2	Riboflavin 5'-Adenosine Diphosphate	0.017181	-0.068439	0.0705626
pme2459	C21H20O11	Luteolin-7-O-glucoside (Cynaroside)	0.0210936	0.0673312	0.070558
pme3381	C9H10O3	3-Hydroxyphenylacetic Acid Methyl Ester	0.000937979	-0.0705015	0.0705077
mws1195	C10H10O3	p-Coumaric acid methyl ester*	0.0620021	-0.033168	0.0703163
pme1841	C5H14N2	Cadaverine	-0.0122308	0.0692339	0.070306
Zmhn001793	C15H18O9	6-O-Caffeoyl-D-glucose	0.0548142	-0.0440212	0.0703027
Lmhp009129	C23H48NO7P	LysoPC 15:0(2n isomer)	0.070045	-0.00524416	0.070241
Zmhn002508	C21H28O12	4-p-Cumaroyl-rhamnosyl-(1→6)-D-glucose	-0.0205238	-0.0671564	0.0702225
Lmhn002140	C14H14O9	Feruloyltartaric acid (Fertaric acid)	-0.0408173	-0.0567592	0.0699118
HJAP135	C24H24O12	Pinocembrin-7-O-(6''-O-malonyl)glucoside	0.0690239	-0.0105135	0.06982
Xmgn006542	C10H10O4	Dimethyl Phthalate	0.0368065	-0.0591016	0.0696256
Lmmn004625	C21H22O11	Dihydrokaempferol-7-O-glucoside	0.0558176	0.0413594	0.0694709
pmp001270	C24H48NO7P	LysoPC 16:1	0.0685639	0.0110295	0.0694454
mws0906	C16H22O8	Coniferin	0.0551832	-0.0417015	0.069168
pmb0484	C5H13NO	Choline	0.0664622	-0.0189321	0.0691061
Lmbn001288	C5H8O4	2-Hydroxy-2-methyl-3-oxobutanoic acid*	0.0564402	-0.0397598	0.0690386
pmd0130	C22H46NO7P	LysoPC 14:0	0.0667362	-0.0173777	0.0689616
pme3313	C6H13O9P	D-Fructose 6-phosphate*	0.0339323	-0.0599806	0.0689135
Lmhp010515	C25H52NO7P	LysoPC 17:0(2n isomer)	0.0681042	-0.0103338	0.0688838
mws0473	C5H8O4	2-Methylsuccinic acid*	0.0566699	-0.039105	0.0688526
pmp001251	C26H50NO7P	LysoPC 18:2(2n isomer)	0.0635582	0.0264137	0.0688283
Lmnn002886	C23H26O11	1'-O-(3,4-Dihydroxyphenethyl)-O-caffeoyl-glucoside	-0.00975366	-0.067939	0.0686355
pmb1912	C20H23N7O7	10-Formyltetrahydrofuran	0.00451866	0.0684765	0.0686254
pmb0801	C14H19NO9	4-Pyridoxic acid-O-glucoside	-0.0517635	0.0450208	0.0686027
mws0520	C11H13NO4	N-Acetyl-L-tyrosine	-0.056981	0.0374575	0.0681902
pme2266	C10H16N2O3S	Biotin	0.00431218	-0.0680122	0.0681488
Zmhn002334	C16H20O9	6-O-Feruloyl-D-glucose	0.0532369	-0.0423564	0.0680311
mws0863	C5H11O7P	2-Deoxyribose-5'-phosphate	0.000870235	0.0679811	0.0679867
HJAP123	C40H52O25	Isorhamnetin-3-O-rutinoside-7-O-rutinoside	-0.0651112	0.0194436	0.0679524
mws1077	C16H18O9	Scopoletin-7-O-glucoside (Scopolin)	-0.039983	0.0547735	0.0678143
Zmyn002919	C8H8O2	2-Methylbenzoic acid	0.0559942	-0.0382513	0.0678123
mws1212	C11H12O4	Methyl ferulate	0.0412329	-0.0537975	0.0677814
pme3017	C4H9NO2	2-Aminoisobutyric acid	0.0675252	-0.00500904	0.0677107
Lmmn000806	C5H8O4	Dimethylmalonic acid*	0.0548578	-0.039495	0.0675961
pme2362	C8H8O3	Mandelic acid	-0.0528088	0.0421887	0.0675918
Lmhp012042	C21H38O4	2-Linoleoylglycerol	0.0672231	-0.00677022	0.0675631
Lmbn001364	C5H8O4	4-Hydroxy-2-Oxopentanoic Acid*	0.0556391	-0.0383081	0.0675517
pmb0855	C24H50NO7P	LysoPC 16:0	0.0655517	0.0162457	0.0675348
pmb2620	C11H12O4	3,4-Dimethoxycinnamic acid	0.0408478	-0.0537436	0.067505
pmb2497	C9H10O5	4-Hydroxy-3-methoxymandelate	0.0151388	-0.0656236	0.0673472
mws0147	C5H10O3	β-Hydroxyisovaleric acid	0.0483488	-0.0467016	0.0672209
Lmtp003677	C27H30O17	Quercetin-3-O-sophoroside (Baimaside)	-0.0348516	-0.0574285	0.0671764
pmp001273	C26H50NO7P	LysoPC 18:2	0.0658952	0.0129558	0.0671568
pmb0874	C23H44NO7P	LysoPE 18:2(2n isomer)	0.0656999	0.0134796	0.0670684
Lmhp112042	C21H38O4	1-Linoleoylglycerol	0.0664011	-0.00869769	0.0669683
Lmgn001670	C7H6O3	Salicylic acid	0.0256576	-0.0618571	0.0669672
Lmbp002309	C17H22O9	Sinapaldehyde-4-O-Glucoside	-0.0325116	-0.0585088	0.0669349
mws0823	C5H8O3	3-Methyl-2-Oxobutanoic acid	0.0658014	0.0113741	0.0667772
pmb0964	C16H23N5O5	Isopentenyladenine-7-N-glucoside	-0.0428371	0.0511263	0.0667003
pme0275	C5H8O3	4-Oxopentanoic Acid	0.0658337	-0.0100758	0.0666003
Lmhp009590	C25H50NO7P	LysoPC 17:1	0.0588173	0.0311889	0.066575
pmp001080	C28H32O15	Diosmetin-7-O-Neohesperidoside (Neodiosmin)	0.0663325	-0.00266943	0.0663862
pme3083	C8H7NO3	2-(Formylamino)benzoic acid	0.0620819	0.02339	0.0663419
mws1038	C11H22N2O4S	Pantetheine	-0.0285832	0.0595364	0.0660423
Lmhp009187	C20H42NO7P	LysoPE 15:0	0.064191	0.0154844	0.0660322
Lmhp009034	C21H42NO7P	LysoPE 16:1	0.0646629	0.0129914	0.065955
mws1090	C6H13O9P	Glucose-1-phosphate*	0.0476985	-0.045363	0.0658251
pme3007	C9H14N2O12P2	Uridine 5'-diphosphate	0.0547021	-0.0363028	0.0656522
mws0675	C11H15N2O8P	β-Nicotinamide mononucleotide	0.0629254	0.0183556	0.065548
pmb2406	C25H52NO7P	LysoPC 17:0	0.0639216	-0.0140128	0.0654395
mws2186	C20H18O11	Avicularin(Quercetin-3-O-α-L-arabinofuranoside)	0.0192764	-0.0623182	0.0652314
Lmhp007836	C21H38NO7P	LysoPE 16:3	0.0644652	-0.00881141	0.0650646
pmn001707	C30H46O5	Quillaic acid	0.0109019	0.0639709	0.0648932
pmb0824	C25H28O13	Syringic acid-4-O-(6''-feruloyl)glucoside	0.0453084	-0.0462582	0.0647509
pmn001690	C16H24O7	3-Hydroxy-4-isopropylbenzylalcohol-3-O-glucoside	0.0647399	-0.000294486	0.0647405
mws0866	C6H13O9P	D-Glucose 6-phosphate*	0.0468243	-0.0445393	0.064624
mws5040	C12H21O11Na	Turanose	-0.046559	0.0445841	0.0644631
Zmpn003368	C18H30O3	13S-Hydroxy-9Z,11E,15Z-octadecatrienoic acid	-0.0555644	0.0326025	0.064423
Lmhp011562	C21H36O4	1-α-Linolenoyl-glycerol	0.0627636	-0.0144563	0.0644069
Lmhp009464	C22H44NO7P	LysoPE 17:1(2n isomer)	0.0606359	0.0217075	0.0644044
ML10180524	C9H13N3O5	Cytarabine	0.030329	0.056615	0.064227
pme3961	C10H13N5O3	2'-Deoxyadenosine	0.0573272	0.0287814	0.0641465
pme2914	C6H10O5	3-Hydroxy-3-methylpentane-1,5-dioic acid	0.0509821	-0.0388626	0.0641052
pma1303	C24H46NO7P	LysoPC 16:2	0.063179	0.0106796	0.0640753
Lmhp009890	C28H52NO7P	LysoPC 20:3	0.0636394	-0.00739094	0.0640672
Zmtn001464	C10H7NO4	4,8-Dihydroxyquinoline-2-carboxylic acid	0.00513644	0.0635419	0.0637492
pmb0881	C23H44NO7P	LysoPE 18:2	0.063615	0.000371544	0.0636161
Lmhp011388	C21H36O4	2-α-Linolenoyl-glycerol	0.0628998	-0.00828245	0.0634428
Rfmb091	C18H32O3	9S-Hydroxy-10E,12Z-octadecadienoic acid*	-0.0235761	0.0588222	0.063371
pmb2260	C23H46NO7P	LysoPC 15:1	0.0612043	0.0162327	0.0633203
mws2184	C11H12O4	Ethyl caffeate	0.0406603	-0.048493	0.0632837
Lmsp003729	C27H30O17	Myricetin-3-O-rutinoside	-0.0620436	-0.0122051	0.0632327
Hmbp001276	C8H8O4	Gallacetophenone	0.0597095	-0.0206167	0.0631686
pme2758	C5H9NO5	4-Hydroxy-L-glutamic acid	0.058391	-0.0240697	0.0631574
mws1337	C9H17NO5	D-Pantothenic Acid	-0.0170316	0.0607937	0.0631344
pme0243	C5H8O4	Glutaric acid	0.0627508	0.00676795	0.0631148
pme2559	C6H9NO5	N-Acetyl-L-Aspartic Acid	0.0404419	0.0484546	0.0631142
Hmgn001653	C7H6O3	Protocatechualdehyde*	0.0442596	0.0449018	0.0630483
pmb0751	C16H16O7	Trans-5-O-(p-Coumaroyl)shikimate	0.0342397	-0.0529371	0.0630452
pmd0132	C24H50NO7P	LysoPC 16:0(2n isomer)	0.062958	-0.00237742	0.0630029
mws5035	C15H22N2O3	L-Leucyl-L-phenylalanine	0.0472322	0.041612	0.0629479
Lmbn005369	C18H32O3	13(S)-HODE;13(S)-Hydroxyoctadeca-9Z,11E-dienoic acid*	-0.024708	0.0578877	0.0629402
Lmbn001981	C7H6O3	2,5-Dihydroxybenzaldehyde*	0.044427	0.0445654	0.0629272
Zmhn001883	C14H18O9	Vanillic acid-4-O-glucoside	0.0594889	-0.0201789	0.0628182
Lmhp008801	C23H42NO7P	LysoPE 18:3	0.0619208	0.0105212	0.0628083
Lmhp008763	C21H42NO7P	LysoPE 16:1(2n isomer)	0.0612405	-0.0139215	0.0628029
mws4173	C11H10O4	5,7-Dimethoxycoumarin (Limettin)(Citropten)	-0.0252178	-0.0574379	0.06273
pmb0774	C10H12N2O	N-Hydroxytryptamine*	0.0577424	0.0242966	0.0626459
Lmhp008885	C20H42NO7P	LysoPE 15:0(2n isomer)	0.0625747	-0.00147711	0.0625921
Hmqp006235	C26H46NO7P	LysoPC 18:4	0.061956	0.00872055	0.0625667
pme3033	C4H9NO2	N,N-Dimethylglycine	-0.0319667	0.0536163	0.0624226
mws0005	C10H12N2	Tryptamine	0.0616811	0.00853926	0.0622694
Hmmn002544	C16H20O9	Ferulic acid-4-O-glucoside	0.0450253	-0.0429666	0.0622367
pme3388	C7H16N4O2	Homoarginine	-0.0597431	-0.0173626	0.0622149
HJN087	C21H22O10	Naringenin-4'-O-glucoside	0.0381998	-0.0489245	0.0620712
pmb3142	C13H16O8	Salicylic acid-2-O-glucoside	0.0617461	-0.00560922	0.0620003
pmb0037	C10H15NO	Hordenine	0.0103542	-0.0611118	0.0619828
Lmhp009769	C22H44NO7P	LysoPE 17:1	0.0586846	0.0197456	0.0619175
Lmbn006152	C18H32O2	(9Z,11E)-Octadecadienoic acid	0.0598547	-0.0152234	0.0617603
Lmnp002741	C27H30O14	Genkwanin-6-C-(2''-O-apiosyl)glucoside	0.0360759	-0.050034	0.0616836
mws5037	C9H18N2O3	L-Alanyl-L-leucine	-0.0368552	0.0493777	0.0616154
pme0256	C5H4N4O2	Xanthine	-0.00562181	0.0613151	0.0615723
Zmzn000079	C4H9O7P	D-Erythrose-4-phosphate	0.0583921	-0.0195116	0.0615657
pmn001695	C16H20O10	Trihydroxycinnamoylquinic acid	-0.0219946	0.0574494	0.0615158
Lmmn004145	C38H60O10	3-O-(2-O-Acetyl-glucosyl)oleanolic acid	0.0452038	0.0417166	0.0615114
Lmhp010040	C25H46NO7P	LysoPE 20:3	0.0612374	0.00576541	0.0615082
mws0045	C21H20O11	Quercetin-3-O-rhamnoside(Quercitrin)	0.0362168	-0.0496956	0.0614923
pme2954	C15H10O7	Quercetin	0.0340865	-0.0511651	0.0614797
mws0024	C7H6O5	Gallic acid	0.0325247	-0.0520567	0.0613821
pmb0863	C24H46NO7P	LysoPC 16:2(2n isomer)	0.0613807	0.000160926	0.0613809
mws0749	C7H6O3	4-Hydroxybenzoic acid	0.0439451	0.0427381	0.0613003
pme1691	C7H16NO2	Acetylcholine	-0.0210064	0.0575726	0.0612852
pmb0374	C5H5N5	2-Aminopurine	0.0400653	0.0462611	0.061199
pme0195	C3H7NO2S	L-Cysteine	-0.03305	0.0514561	0.0611558
pmb0864	C19H40NO7P	LysoPE 14:0	0.0601513	0.0106542	0.0610876
Lmlp003161	C14H20N2O3	N-Feruloylputrescine	-0.0163604	0.058791	0.061025
mws2118	C21H24O10	Phloretin-2'-O-glucoside (Phlorizin)	-0.0528239	0.0304496	0.0609716
pmd0147	C28H54NO7P	LysoPC 20:2	0.0609393	-0.00175419	0.0609645
pmp000509	C6H6O3	Maltol	0.055307	-0.0256128	0.0609498
Lmhp010908	C27H54NO7P	LysoPC 19:1	0.0555258	0.0250811	0.0609277
pmb0468	C6H11NO3S	N-Formyl-L-Methionine	0.0560928	0.0237557	0.0609158
pme2024	C10H12N2O	Serotonin*	0.0570843	0.0212516	0.0609118
mws0126	C26H54NO7P	LysoPC 18:0	0.0606911	0.00507324	0.0609028
pmn001686	C16H32O4	10,16-Dihydroxypalmitic acid	0.0390738	-0.0466503	0.0608524
Lmhp008833	C24H48NO7P	LysoPC 16:1(2n isomer)	0.0608446	-0.000871085	0.0608509
pmp000583	C22H20O12	Diosmetin-7-O-glucuronide	0.0602915	0.00818362	0.0608443
pme1987	C3H7NO2	L-Alanine	-0.0137853	-0.0592438	0.0608265
Lmhp008589	C23H42NO7P	LysoPE 18:3(2n isomer)	0.057946	0.0181327	0.0607168
pmb0876	C21H44NO7P	LysoPE 16:0	0.0585069	0.0160622	0.0606717
mws0636	C18H20N2O3	L-Phenylalanyl-L-phenylalanine	0.0575802	0.0190571	0.0606519
Lmhp007840	C27H52NO7P	LysoPC 19:2	0.0598842	-0.00872597	0.0605166
Lmdp003509	C20H18O11	Quercetin-3-O-xyloside (Reynoutrin)	0.018689	-0.0573241	0.0602937
pme1194	C9H13N3O4	2'-Deoxycytidine	0.00328471	0.0601524	0.060242
Lmhp008337	C19H40NO7P	LysoPE 14:0(2n isomer)	0.0602114	-0.000369001	0.0602126
mws0057	C21H22O11	Eriodictyol-7-O-glucoside	0.028278	0.0531563	0.06021
mws0884	C10H12N5O6P	Cyclic 3',5'-Adenylic acid	0.0373386	0.0471905	0.0601757
mws0491	C8H11N	Phenethylamine	0.0427793	0.0422216	0.0601061
Lmhp010514	C25H48NO7P	LysoPE 20:2(2n isomer)	0.0600909	-0.000938541	0.0600982
Lmfp001509	C13H16O9	1-O-Galloyl-rhamnose	0.0341658	-0.0494307	0.0600891
Hmcp001578	C28H32O17	Isorhamnetin-3,7-O-diglucoside	-0.0519303	0.0301977	0.0600721
pmb0889	C18H30O2	Punicic acid (9Z,11E,13Z-octadecatrienoic acid)	-0.0202879	0.0563361	0.0598778
Lmhp002374	C39H50O25	Quercetin-3-O-glucosyl(1→4)rhamnoside-7-O-rutinoside	-0.0524477	-0.0288734	0.0598701
mws0677	C12H14N2O2	N-Acetyl-5-hydroxytryptamine	0.058924	-0.00996771	0.0597612
mws0628	C7H6O2	4-Hydroxybenzaldehyde	0.0251813	0.0540784	0.0596538
pme1439	C9H8O3	p-Coumaric acid	0.0582788	-0.0124502	0.0595938
Lmhp008273	C20H40NO7P	LysoPE 15:1(2n isomer)	0.0588847	0.00914112	0.05959
Lmhp009802	C25H46NO7P	LysoPE 20:3(2n isomer)	0.0591729	0.0067295	0.0595543
Lmhp010757	C25H48NO7P	LysoPE 20:2	0.0584191	0.0102873	0.059318
Zmyn000110	C6H14NO8P	D-Glucosamine 1-phosphate	0.0534325	0.0254341	0.0591771
pme0264	C10H14N2O5	Thymidine	0.020228	0.0555583	0.0591261
pme0230	C10H13N5O4	Adenosine	0.04268	0.0406821	0.0589628
HJN055	C21H24O10	Dihydrocharcone-4'-O-glucoside	-0.0479014	0.0343529	0.0589463
pmn001610	C20H36O2	Eicosadienoic acid	0.0562102	-0.0174701	0.0588625
Lmhn003074	C14H14O8	Feruloylmalic acid	0.0397503	-0.0432677	0.0587552
mws2212	C9H8O4	Caffeic acid	0.0449974	-0.0377397	0.0587286
Zmhn000785	C19H32O16	Di-O-Glucosylquinic acid	-0.0429602	0.0399316	0.0586525
ML10179289	C8H10O	2-Phenylethanol	0.0425052	0.0402683	0.058551
pmp000001	C16H12O6	Hispidulin (5,7,4'-Trihydroxy-6-methoxyflavone)	0.021579	-0.0541987	0.0583365
Lmlp003024	C20H30O7N4	N'-p-Coumaroylagmatine-glucoside	0.0369852	0.0451011	0.0583268
Rfmb26201	C30H38O14	Syringaresinol-4'-O-(6''-acetyl)glucoside	-0.00280594	0.058238	0.0583056
Lmhp007598	C27H52NO7P	LysoPC 19:2(2n isomer)	0.0193268	0.054982	0.0582799
Lmgn002555	C8H14O4	2-Propylglutaric acid	0.0174748	-0.0554213	0.058111
pme0026	C6H14N2O2	L-Lysine	0.0441844	-0.0375963	0.058015
mws5038	C12H22O11	Isomaltulose*	-0.0385954	-0.043147	0.0578902
pme1383	C8H11NO3	Pyridoxine	-0.00235206	0.0577731	0.0578209
mws1080	C12H22O11	Galactinol	-0.044574	-0.0368238	0.0578172
mws0248	C9H12N2O6	Uridine	0.0550863	0.0173774	0.0577623
Lmhp011549	C28H56NO7P	LysoPC 20:1	0.0577412	-0.00155695	0.0577622
Lmhp009384	C33H58O14	1-Linoleoylglycerol-2,3-di-O-glucoside	0.0534105	-0.021908	0.057729
pme0033	C5H4N4O	Hypoxanthine	0.00299588	-0.0575864	0.0576643
Zmfn000481	C14H22N2O16P2	Uridine-5'-Diphosphate-D-Xylose	0.0576553	0.000953985	0.0576632
pme3311	C6H14O12P2	D-Fructose-1,6-biphosphate	0.0125585	-0.0560598	0.0574492
pmd0160	C21H44NO7P	LysoPE 16:0(2n isomer)	0.0569126	0.00735487	0.0573859
Lmsn000381	C12H22O11	D-Maltose*	-0.0385405	-0.0422791	0.0572092
pmb0069	C7H7NO	Benzamide	0.0430768	0.0376051	0.0571818
pme1021	C6H10O6	D-Glucono-1,5-lactone	0.00312945	-0.0570415	0.0571273
Hmbp003234	C12H14O6	1-O-Caffeoylglycerol	0.0114388	-0.0559513	0.0571086
pmd0146	C28H54NO7P	LysoPC 20:2(2n isomer)	0.0568061	-0.00578055	0.0570995
pme3034	C5H8O4	Ethylmalonic acid	0.0567063	0.00538834	0.0569617
Cmsp004086	C16H14O6	Dihydrokaempferide	-0.0210214	-0.0528071	0.0568374
mws0014	C10H10O4	Ferulic acid	0.0346466	-0.0449896	0.0567843
Lmhn002926	C13H12O7	p-Coumaroylmalic acid	0.0473536	-0.0312825	0.0567535
pme0295	C6H11NO3	4-Acetamidobutyric acid	-0.00921879	0.0559725	0.0567266
mws5045	C12H24O3	12-Hydroxydodecanoic acid	-0.0562943	0.00642238	0.0566595
Lmbn001676	C6H10O4	3-Hydroxy-3-Methyl-2-Oxopentanoic Acid	0.053686	-0.0175726	0.0564888
Hmyn007168	C22H45O9P	LysoPG 16:0	0.0556988	-0.00940179	0.0564867
Lmhp009190	C33H58O14	2-Linoleoylglycerol-1,3-di-O-glucoside	0.0548782	0.0128244	0.0563567
mws2125	C3H5O6P	Phosphoenolpyruvate	0.00425806	-0.0560191	0.0561807
pmb2654	C19H27NO12	Anthranilate-1-O-Sophoroside	-0.018786	-0.0527364	0.0559825
Zmgn001448	C7H12O5	2-Propylmalic Acid*	0.00070815	-0.0559584	0.0559629
mws0262	C4H6O6	L-Tartaric acid	-0.00764898	0.0551257	0.0556539
Lmhp010190	C26H52NO7P	LysoPC 18:1(2n isomer)	0.050923	0.0221863	0.0555462
Hmbn002692	C22H30O14	6'-O-Feruloyl-D-sucrose	0.0545697	-0.00960798	0.0554091
Zmpn000199	C6H10O8	D-Galactaric acid*	0.0545109	0.00935884	0.0553084
Hmtn001120	C14H20O8	5-(2-Hydroxyethyl)-2-O-glucosylphenol	-0.00253371	-0.0552036	0.0552617
mws0051	C16H12O5	Acacetin	0.0542224	-0.0103634	0.0552039
Rfmb319	C6H11NO2	Pipecolic acid*	0.0429898	-0.0346181	0.0551954
pmb2657	C10H18N4O6	Argininosuccinic acid	0.0516089	-0.019098	0.0550292
pme0534	C6H12O7	Gluconic acid	0.0545169	0.00715947	0.054985
mws0129	C16H12O5	Genkwanin (Apigenin 7-methyl ether)	0.0536791	-0.0108084	0.0547565
mws0639	C7H6O4	2,3-Dihydroxybenzoic Acid*	0.0455467	-0.0303578	0.0547366
mws0874	C10H14N5O7P	3'-Adenylic Acid	0.0267101	-0.0476609	0.0546351
Hmjp002999	C28H32O16	Isorhamnetin-3-O-rutinoside (Narcissin)	-0.0157765	-0.0522395	0.0545698
Hmcp002539	C22H22O11	Isorhamnetin-3-O-rhamnoside	0.0339351	-0.0426751	0.0545229
pmb2940	C17H22O10	1-O-Glucosyl sinapate	0.0315184	-0.0441927	0.0542807
mws0183	C7H6O4	3,4-Dihydroxybenzoic acid (Protocatechuic acid)*	-0.0136971	0.0524608	0.0542195
mws0066	C16H12O7	Isorhamnetin	0.0333607	-0.0425465	0.0540661
pme0193	C5H10N2O3	L-Glutamine	0.0429582	-0.0326054	0.0539307
mws1290	C30H26O13	Kaempferol-3-O-(6''-p-Coumaroyl)glucoside (Tiliroside)	-0.0531065	-0.00717578	0.0535891
Lmsn002815	C27H30O15	Kaempferol-3-O-rutinoside(Nicotiflorin)*	0.0144602	0.0516008	0.0535887
Lmsn012425	C30H48O4	Rubusic acid (3β,7α-Dihydroxyolean-12-en-28-oic acid)	0.052677	-0.00905851	0.0534502
Zmhn002422	C16H20O9	1-O-Feruloyl-D-Glucose	0.0373755	-0.0378926	0.0532238
Lmdn003756	C10H10O4	Methyl caffeate	-0.0173516	0.0503006	0.0532093
mws1329	C21H20O12	Quercetin-7-O-glucoside*	-0.0499998	-0.01752	0.0529805
Lmbn001754	C7H12O5	3-Isopropylmalic Acid*	-0.0017199	-0.0529298	0.0529577
mws0159	C9H8O3	Phenylpyruvic acid	0.0483569	-0.0214033	0.0528818
mws0885	C7H6O4	2,4-Dihydroxybenzoic acid	0.0445624	-0.0283336	0.0528072
mws0061	C21H20O12	Quercetin-3-O-galactoside (Hyperin)	-0.0489558	-0.0196779	0.0527626
pma3724	C17H20O9	1-O-Feruloylquinic acid	0.052718	0.0020948	0.0527596
pme3163	C7H15O10P	D-Sedoheptuiose 7-phosphate	0.00605495	0.0522847	0.0526341
mws0367	C18H30O2	α-Linolenic Acid*	0.048888	-0.0191068	0.0524891
mws1164	C6H12O6	D-Fructose*	0.0114608	-0.0511296	0.0523984
MA10039492	C6H6O6	Dehydroascorbic acid	0.0329963	-0.04063	0.0523408
mws1179	C21H22O10	Naringenin-7-O-glucoside (Prunin)	0.0471272	-0.0227039	0.052311
mws0251	C5H6N2O2	Thymine	0.000807571	0.0521968	0.052203
pme1109	C5H5N5O	Guanine	0.037851	0.0359433	0.0521979
pme3154	C6H12O4	Mevalonic acid	-0.0317892	-0.0413054	0.0521219
pme2527	C5H12N2O2	L-Ornithine	0.0283109	-0.0437562	0.0521163
Zmjn001813	C7H12O4	Pimelic acid*	-0.0518338	-0.00539821	0.0521141
Lmbn005923	C18H30O2	Crepenynic acid	0.0503082	-0.0133085	0.0520388
Lmgp003270	C16H16O10	Scopoletin-7-O-glucuronide	0.0510322	0.00994975	0.0519931
mws1014	C10H8O5	Fraxetin (7,8-Dihydroxy-6-methoxycoumarin)	-0.02402	0.0460931	0.0519762
mws0366	C18H30O2	γ-Linolenic Acid*	0.0494904	-0.0158009	0.0519516
Lmhn002629	C11H10O7	Benzoyltartaric acid	-0.0329142	-0.0401196	0.0518934
Lmsp004045	C28H32O16	Isorhamnetin-3-O-glucoside-7-O-rhamnoside	-0.047817	0.019931	0.0518046
Lmhp009526	C27H46O9	2-α-Linolenoyl-glycerol-1-O-glucoside	0.00760062	0.0511878	0.0517491
mws0091	C21H20O12	Quercetin-3-O-glucoside (Isoquercitrin)*	-0.0498788	-0.0135534	0.0516875
pme1187	C10H14N2O6	5-Methyluridine	-0.0174405	0.0486517	0.0516832
Zmtn001624	C10H7NO3	N-Acetylisatin	0.0363788	0.0366739	0.0516565
Lmhp002001	C14H20N2O3	L-Valyl-L-Phenylalanine	0.0481728	0.0184235	0.0515756
pme2993	C10H8O4	Scopoletin (7-Hydroxy-5-methoxycoumarin)	0.0173684	0.04842	0.0514408
Lmyp003857	C35H28O19	Kaempferol-3-O-(2'',6''-digalloyl)glucoside	0.0306884	0.0412272	0.0513952
ML10181668	C6H11NO2	Cycloleucine*	0.039144	-0.0331922	0.0513223
Lmmn003323	C16H32O3	2-Hydroxyhexadecanoic acid	0.0203581	0.0470791	0.0512922
pme3732	C9H13N3O5	Cytidine	0.0128851	0.0496208	0.0512665
Lmtn002324	C19H28O11	Benzyl-(2''-O-glucosyl)glucoside	-0.0054669	-0.0509478	0.0512403
NK10253223	C8H9NO3	2-Amino-3-methoxybenzoic acid	0.0057952	0.0508765	0.0512055
pmb0998	C10H14N5O8P	Guanosine 5'-monophosphate	0.050024	-0.0109167	0.0512013
mws0028	C8H8O4	Vanillic acid	0.0308808	0.0407674	0.051143
Lmyn001269	C27H30O16	Kaempferol-3-O-sophoroside	0.0181376	-0.047792	0.051118
mws0011	C17H24O9	Syringin	-0.034446	-0.0377483	0.0511024
pmb3101	C7H12O5	2-Isopropylmalic Acid	0.00384101	-0.0508954	0.0510401
Hmcp002316	C21H20O11	Isorhamnetin-3-O-arabinoside	0.0256295	-0.0440566	0.0509692
mws0047	C27H30O14	Apigenin-7-O-neohesperidoside (Rhoifolin)	0.0426155	-0.0278739	0.0509219
pme1598	C22H24O11	Hesperetin-5-O-glucoside	-0.0476364	-0.0178333	0.0508651
Zmxp002867	C28H32O16	Chrysoeriol-5,7-di-O-glucoside	-0.045021	0.0233149	0.0506999
pmd0136	C26H54NO7P	LysoPC 18:0(2n isomer)	0.0428846	-0.0269071	0.0506269
Lmbn005287	C18H32O4	7S,8S-DiHODE; (9Z,12Z)-(7S,8S)-Dihydroxyoctadeca-9,12-dienoic acid	0.0496896	-0.00966782	0.0506213
Hmln002199	C23H22O13	Quercetin-3-O-(6''-acetyl)galactoside	-0.0199133	0.0464962	0.050581
mws0182	C8H8O3	p-Hydroxyphenyl acetic acid	-0.0108639	0.0493652	0.0505465
pme1178	C10H13N5O5	Guanosine	0.0492654	-0.0111405	0.0505094
mws0180	C7H6O4	2,5-Dihydroxybenzoic acid; Gentisic Acid*	-0.00926523	0.0495268	0.050386
pme1261	C9H19NO4	D-Panthenol	-0.00518629	-0.0501058	0.0503735
pmb0883	C23H48NO7P	LysoPE 18:0	0.0502125	0.00131177	0.0502296
mws1375	C12H21N3O6	Nicotianamine	0.0358925	-0.0349499	0.0500976
pme3011	C4H9NO2	γ-Aminobutyric acid	-0.0312002	0.0390178	0.0499584
Lmrn002746	C6H12O3	2-Hydroxy-4-methylpentanoic acid	0.0251002	-0.0428812	0.0496872
pme0181	C7H11N3O2	3-Methyl-L-Histidine	-0.0111821	0.048326	0.0496028
pmb2211	C19H38N2O3	Cocamidopropyl betaine	-0.0482899	-0.0106851	0.0494579
pmb0962	C10H22N2O4	L-Lysine-Butanoic Acid	0.00671041	-0.0489609	0.0494186
Zmhn000892	C13H18O8	4-O-Glucosyl-3,4-dihydroxybenzyl alcohol	-0.046987	-0.0149435	0.0493061
Zmjp000624	C8H9NO3	Pyridoxal	0.00455841	0.0487825	0.048995
pmn001517	C15H22O8	3,4,5-Trimethoxyphenyl-1-O-Glucoside	-0.0461935	0.0159952	0.0488844
Hmln002189	C24H22O15	Quercetin-3-O-(6''-malonyl)galactoside	-0.0219068	0.0436601	0.0488479
pmb2507	C5H11O7P	2-Deoxyribose-1-phosphate	0.0381358	0.0304574	0.0488056
pmb0530	C21H27N7O14P2	Nicotinic acid adenine dinucleotide	0.0369462	-0.0317064	0.0486859
Xmsn002700	C21H22O12	Taxifolin-3'-O-glucoside	-0.0467145	-0.0133304	0.0485793
pmp001282	C28H50NO7P	Propyl 2-(trimethylammonio)ethyl phosphate	0.0482528	-0.00532458	0.0485457
Lmdp003286	C21H20O12	Isohyperoside	-0.0347529	-0.0335395	0.0482977
pmb2791	C18H30O4	9-Hydroperoxy-10E,12,15Z-octadecatrienoic acid	0.00804268	0.0475949	0.0482697
pma2987	C6H11N3O	Histidinol	-0.0159561	0.0455068	0.0482231
pmb0197	C11H15N5O5	N7-Methylguanosine	0.0473653	0.00848036	0.0481185
pmb0981	C10H14N5O7P	Adenosine 5'-monophosphate	-0.00703179	-0.047556	0.0480731
mws0596	C7H7NO3	3-Hydroxyanthranilic acid	0.00447795	0.047802	0.0480113
pmb2826	C5H8O5	L-Citramalic acid	0.047139	-0.00873449	0.0479414
pme3207	C6H6O4	Muconic acid	-0.0477283	0.0041571	0.047909
mws1641	C6H4N4O2	Lumazine	0.0300522	0.0370918	0.0477382
Xmyp004678	C32H38O19	Kaempferol-3-O-(2-O-Xylosyl-6-O-Rhamnosyl)Glucoside	-0.0385763	-0.0279139	0.0476163
Zmhn001926	C13H16O8	1-O-Salicyl-D-glucose	-0.00106149	-0.0475827	0.0475945
Lmhp010334	C27H48O9	2-Linoleoylglycerol-1-O-glucoside	0.0454962	0.0139711	0.047593
pmb0752	C17H20O9	3-O-Feruloylquinic acid	0.04741	0.00391333	0.0475713
pmp001281	C26H52NO7P	LysoPC 18:1	0.0468801	-0.00782873	0.0475293
Lmhp009773	C27H46O9	1-α-Linolenoyl-glycerol-3-O-glucoside	0.0470466	0.00467468	0.0472783
pme2598	C8H8O4	3,4-Dihydroxybenzeneacetic acid	0.0450609	-0.0141743	0.0472376
Rfmb25702	C28H34O12	Pinoresinol-4-O-(6''-acetyl)glucoside	0.047213	-0.000102038	0.0472131
Lmhp003162	C34H42O21	Chrysoeriol-6,8-di-C-glucoside-4'-O-glucoside	-0.0267366	-0.0387699	0.0470951
pme2529	C6H12O5	1,5-Anhydro-D-glucitol	0.04708	0.000583636	0.0470837
mws1060	C10H12N4O5	9-(Arabinosyl)hypoxanthine	-0.0276032	0.0380641	0.0470193
Cmjn004337	C18H26O10	Benzyl-(2''-O-xylosyl)glucoside	-0.046624	0.00200325	0.046667
mws4174	C8H15NO6	N-Acetyl-D-mannosamine	-0.00269154	0.046551	0.0466288
Lmsn009589	C30H48O6	2α,3β,19α,23-Tetrahydroxyurs-12-en-28-oic acid	0.0168518	-0.0433803	0.0465385
Lmbp000123	C6H13NO2S	L-Homomethionine	0.0450055	-0.0111301	0.0463614
Cmpp003619	C10H8O4	6,7-Dihydroxy-4-methylcoumarin	0.0160406	0.043239	0.0461185
mws2608	C8H15NO6	N-Acetyl-D-galactosamine	-0.0028143	0.0458931	0.0459793
mws0237	C9H16O4	Azelaic acid	-0.0018581	0.0458551	0.0458927
pme0490	C6H5NO2	Nicotinic acid (Vitamin B3)	0.0121787	0.0441357	0.0457852
pmb0880	C23H48NO7P	LysoPE 18:0(2n isomer)	0.0457324	-0.00200611	0.0457764
mws1506	C29H36O16	Plantamajoside	-0.0356176	0.0287435	0.045769
pme1137	C6H5NO3	6-Hydroxynicotinic acid	-0.0285786	0.0357393	0.0457606
mws4176	C12H16N2O3	L-Alanyl-L-Phenylalanine	0.0453151	0.00631319	0.0457527
pmb0302	C2H8NO3P	2-Aminoethylphosphonate	-0.0287148	0.0355841	0.045725
mws0289	C23H46NO7P	LysoPE 18:1	0.0452378	-0.00537874	0.0455565
mws0983	C20H39NO2	N-Oleoylethanolamine	0.0201456	0.0408315	0.0455308
Lmhp010573	C27H48O9	1-Linoleoylglycerol-3-O-glucoside	0.045171	0.00535418	0.0454872
Lmzp002365	C22H24O11	Hesperetin-7-O-glucoside	0.0113893	-0.043984	0.0454346
Lmfn000604	C13H16O10	6-O-Galloyl-D-glucose	-0.0435793	-0.0124783	0.0453306
Lmbp000668	C6H5NO2	Isonicotinic acid	0.0113621	0.04375	0.0452013
pmb0492	C34H37N3O6	N',N'',N'''-p-Coumaroyl-cinnamoyl-caffeoyl spermidine	0.0445335	0.00734217	0.0451347
Lmhp008513	C33H56O14	2-α-Linolenoyl-glycerol-1,3-di-O-glucoside	0.0417157	0.0171526	0.0451045
pme2755	C8H15NO6	N-Acetyl-D-glucosamine	-0.0110166	0.0436706	0.0450387
Lmmn000774	C15H20O9	Dihydrocaffeoylglucose	-0.00529291	-0.0446343	0.0449471
Zmjp000182	C7H16N4O2	N-Monomethyl-L-arginine	0.0365755	-0.0260246	0.0448893
pma3101	C11H14NO6+	Nicotinate D-ribonucleoside	0.0408904	0.0183066	0.0448013
HJAP128	C34H42O20	Isorhamnetin-3-O-rutinoside-7-O-rhamnoside	-0.0402571	0.0191363	0.0445739
pme0516	C6H12O6	Inositol	0.0216871	0.0389063	0.0445425
pmp000436	C30H50O	Taraxerol	-0.0052784	0.0441221	0.0444367
Lmmp003767	C21H18O12	Kaempferol-7-O-glucuronide	0.0248101	0.0367355	0.0443288
pmb0856	C23H46NO7P	LysoPE 18:1(2n isomer)	0.0431745	0.010018	0.0443216
mws0254	C6H9N3O2	L-Histidine	0.0425622	-0.0115787	0.0441091
pme3188	C9H13N2O9P	Uridine 5'-monophosphate	0.0396049	-0.0193595	0.0440833
mws1417	C9H7NO2	Indole-3-carboxylic acid	0.00551091	0.0437324	0.0440783
pme2601	C3H6O3	3-Hydroxypropanoic acid	0.0411165	-0.0149433	0.0437478
Lmhp001670	C11H22N2O3	L-Valyl-L-Leucine	0.0433687	-0.00546035	0.0437111
mws0018	C10H26N4	Spermine	-0.0054259	0.0432831	0.0436218
Lmjp003044	C22H22O12	Isorhamnetin-3-O-Glucoside*	-0.0243758	-0.0361129	0.0435698
pmp001252	C17H17NO3	p-Coumaroyltyramine	0.00242421	0.0434484	0.043516
pme2890	C8H16N2O4S2	L-Homocystine	0.0411979	-0.0138747	0.0434716
mws4170	C6H12O6	D-Glucose*	0.0017562	-0.0434185	0.043454
pme0021	C9H11NO2	L-Phenylalanine	0.0112813	-0.0417991	0.0432948
pme2602	C3H8NO6P	O-Phospho-L-serine	0.00911912	0.0422972	0.0432691
pme3705	C6H10O7	D-Glucoronic acid*	0.030072	0.0310913	0.0432549
Lmbn003970	C18H34O5	9,12,13-TriHOME; 9(S),12(S),13(S)-Trihydroxy-10(E)-octadecenoic acid	-0.0204848	0.038031	0.0431971
Zmgn002106	C11H13NO3	N-Acetyl-L-phenylalanine	6.32995e-05	0.0430577	0.0430577
pmn001694	C18H34O5	9,10,13-Trihydroxy-11-Octadecenoic Acid	-0.0283918	0.0322459	0.0429639
mws1433	C18H19NO4	N-Feruloyltyramine	-0.00786786	0.0421665	0.0428943
pme1540	C28H32O16	Isorhamnetin-3-O-neohesperidoside	-0.0427748	-0.000332728	0.0427761
Hmcp002207	C22H22O12	Isorhamnetin-7-O-glucoside (Brassicin)*	-0.0255504	-0.0341537	0.0426533
pmn001606	C20H38O2	Eicosenoic acid	-0.0381398	-0.0190712	0.0426422
Lmrj001698	C9H18N2O4	L-Seryl-L-Isoleucine	0.0383914	-0.0184249	0.0425837
pmn001669	C12H14O5	Methyl sinapate	0.0369307	-0.0209547	0.0424615
Lmbn002072	C7H12O4	2-Propylsuccinic acid*	-0.0423244	0.0011232	0.0423393
pmb0764	C6H9NOS	4-Methyl-5-thiazoleethanol	-0.0406647	0.0114957	0.0422584
pmb2922	C15H24N2O17P2	Uridine 5'-diphospho-D-glucose	0.0282304	-0.0310415	0.0419587
mws1189	C6H10O7	D-Galacturonic acid*	0.0309684	0.0282813	0.041939
Zmyn000155	C7H14N2O3	N-α-Acetyl-L-ornithine	0.0315882	-0.0275489	0.0419137
pme0048	C2H7NO2S	2-Aminoethanesulfinic acid	0.0399039	-0.0126266	0.041854
Hmcp001559	C33H40O20	Isorhamnetin-3-O-rutinoside-7-O-arabinoside	0.0156786	-0.038532	0.0415997
pme0040	C5H5N5	Adenine	0.0413081	-0.00268607	0.0413953
Lmtn000940	C14H18O10	1-O-(3,4-Dihydroxy-5-methoxy-benzoyl)-glucoside	-0.0229696	-0.0342651	0.0412517
Hmcp001589	C34H42O21	Isorhamnetin-3-O-rutinoside-4'-O-glucoside	-0.0341722	-0.0228358	0.0411001
HJAP050	C19H21NO5	N-Feruloyl-3-methoxytyramine	-0.00756531	0.0403923	0.0410947
Lmsp004670	C27H30O15	Kaempferol-3-O-glucoside-7-O-rhamnoside	0.0275476	0.030304	0.0409536
pme3827	C9H11NO4	3,4-Dihydroxy-L-phenylalanine (L-Dopa)	-0.00499908	-0.040523	0.0408302
pmb2643	C14H26O2	Myristoleic acid	-0.0404917	0.00505163	0.0408056
Lmbn005487	C18H34O4	12,13-DHOME; (9Z)-12,13-Dihydroxyoctadec-9-enoic acid	0.0133994	0.0382882	0.0405652
pmp001287	C8H9N	N-Benzylmethylene isomethylamine	0.0079847	-0.039729	0.0405234
pmd0152	C19H39O7P	LysoPA 16:0 (2n isomer)	0.0318227	0.024934	0.0404275
mws0027	C9H10O5	Syringic acid	0.00662981	0.0395824	0.0401338
Zmhn002227	C17H22O10	4-O-Glucosyl-sinapate	-0.0390697	0.00890512	0.0400717
pmc0274	C6H6N4S	6-Methylmercaptopurine	0.0108265	-0.0382869	0.0397882
pme1292	C8H8O4	Homogentisic acid	-0.0279682	0.0281728	0.039698
Hmqn003054	C18H34O5	9,10,11-Trihydroxy-12-octadecenoic acid	-0.0260459	0.0298992	0.0396529
Hmtp000776	C8H9NO3	4,5,6-Trihydroxy-2-cyclohexen-1-ylideneacetonitrile	0.00879106	-0.0384992	0.0394902
Lmhp002031	C12H24N2O3	L-Leucyl-L-Leucine	0.0391284	0.00458132	0.0393957
mws0264	C12H22O11	D-Trehalose*	-0.03503	-0.0179967	0.0393825
pmb0296	C21H40O4	1-Oleoyl-Sn-Glycerol	0.0370029	0.0131384	0.0392661
mws1336	C7H7NO2	4-Aminobenzoic acid	0.0364362	-0.0146042	0.0392541
pmp001105	C33H40O20	Kaempferol-3-O-neohesperidoside-7-O-glucoside	0.02079	0.0328561	0.0388812
HJN086	C21H22O11	Eriodictyol-3'-O-glucoside	-0.0241659	-0.0304176	0.0388487
mws0361	C16H30O2	Palmitoleic Acid	-0.0334794	0.0185528	0.0382763
mws0972	C6H12O3	6-Hydroxyhexanoic acid	-0.0175566	-0.0337652	0.0380569
mws1035	C33H40O19	Kaempferol-3-O-robinoside-7-O-rhamnoside (Robinin)	-0.0123199	-0.0359406	0.0379935
Hmhp001812	C11H15N5O4	2'-O-Methyladenosine	0.00746691	0.037224	0.0379655
mws0263	C5H7NO3	5-Oxo-L-Proline	-0.0112281	-0.0361425	0.0378464
mws0609	C10H12N5O7P	Guanosine 3',5'-cyclic monophosphate	0.0174297	0.0335397	0.0377982
mws1297	C13H18O6	Benzyl glucoside	-0.0268335	0.0265042	0.0377162
mws0668	C10H12N4O6	Xanthosine	-0.0270073	0.026319	0.0377105
pme3443	C11H12O4	Sinapinaldehyde	-0.0313621	0.0206088	0.0375274
Lmxp001668	C9H10O2	2-Methoxy-4-ethenylphenol	-0.0119416	-0.0355607	0.0375122
pme3174	C9H14N3O8P	Cytidine 5'-monophosphate(Cytidylic acid)	0.0359295	-0.0102316	0.0373579
mws1521	C13H18O7	Salicin	0.0130658	-0.0348018	0.0371736
Hmjp002337	C10H8O4	Isoscopoletin (6-Hydroxy-7-Methoxycoumarin)	0.0364003	-0.00518619	0.0367679
Lmbn005443	C18H30O3	13-KODE; (9Z,11E)-13-Oxooctadeca-9,11-dienoic acid*	0.036536	-0.000107653	0.0365362
mws2523	C12H23O14P	Trehalose 6-phosphate	-0.00786706	0.0354792	0.0363409
Lmbn002862	C7H6O3	3-Hydroxybenzoic Acid	0.0298386	-0.0199605	0.0358994
mws1174	C17H14O6	3-O-Acetylpinobanksin	-0.0309422	-0.0180526	0.0358234
pmb2591	C13H14N2O3	N-Acetyl-L-Tryptophan	0.00256567	0.0351727	0.0352661
Lmhp008744	C33H56O14	1-α-Linolenoyl-glycerol-2,3-di-O-glucoside	0.0343219	-0.00773012	0.0351816
pme1216	C6H5NO2	2-Picolinic acid	0.0108997	0.0331555	0.0349012
mws0467	C9H10O3	3-(4-Hydroxyphenyl)-propionic acid	0.0339655	-0.0070966	0.034699
pme3967	C12H17N5O5	2-(Dimethylamino)guanosine	-0.026895	0.0217225	0.0345718
pmn001663	C22H26O8	Syringaresinol	0.000645421	0.0343458	0.0343519
mws1350	C9H10O4	Syringaldehyde; 4-Hydroxy-3,5-Dimethoxybenzaldehyde	-0.0174707	0.0292431	0.0340644
Zmyn004548	C18H28O3	12-Oxo-phytodienoic acid	0.0291855	-0.016822	0.0336864
mws0853	C11H14O4	Sinapyl alcohol	-0.0335587	0.000889326	0.0335705
mws0474	C12H22O4	Dodecanedioic aicd	0.00412054	0.0329176	0.0331745
mws0736	C8H16N2O3	N-Glycyl-L-leucine*	0.0312944	-0.0100567	0.0328706
Hmlp002975	C28H30O17	Isorhamnetin-3-O-glucuronide-7-O-rhamnoside	-0.0257384	-0.0197163	0.0324222
Lmmn004912	C16H12O7	3-O-Methylquercetin	-0.0288944	0.0133099	0.0318126
Hmln002149	C29H36O15	Acteoside	-0.016728	0.0269091	0.0316848
pmb0776	C20H20N2O3	N-Feruloyltryptamine	0.0309848	0.00549662	0.0314685
mws0255	C4H5N3O	Cytosine	0.000730699	0.0312395	0.031248
pme1816	C16H18O9	Neochlorogenic acid (5-O-Caffeoylquinic acid)*	-0.0135196	-0.0278964	0.0309998
pmb2786	C18H30O3	9-Hydroxy-10,12,15-octadecatrienoic acid*	0.0308026	-0.00290433	0.0309392
pme2292	C4H12N2	Putrescine	0.0100138	0.0291778	0.0308483
Lmhn102068	C13H12O8	2-O-Caffeoylmalic acid	-0.0270137	0.0147757	0.0307906
YC512118	C18H35NO	Oleamide (9-Octadecenamide)	-0.0198793	-0.0234279	0.0307255
Lnrp102163	C33H40O20	Quercetin-3-O-rutinoside-7-O-rhamnoside	-0.0158888	-0.0262266	0.0306641
pmb2561	C7H13NO3S	N-Acetyl-L-methionine	0.0145826	-0.0269414	0.0306348
mws5041	C8H16N2O3	L-Glycyl-L-isoleucine*	0.0290387	-0.00954686	0.0305678
pmp001288	C28H32O14	Acacetin-7-O-rutinoside (Linarin)	-0.0205634	0.022325	0.0303523
pme0075	C7H11NO5	N-Acetyl-L-glutamic acid	0.0288503	-0.00818128	0.0299878
Lmjp002867	C27H30O15	Kaempferol-3-O-neohesperidoside*	0.0160989	0.0252571	0.0299515
pme1086	C10H17N3O6S	Glutathione reduced form	-0.0215874	0.0205134	0.0297795
Lmhn001477	C13H12O9	2-Caffeoyl-L-tartaric acid (Caftaric acid)	-0.0296085	-0.00157867	0.0296506
pme1730	C4H6O4	D-Erythronolactone	0.0115622	-0.0270564	0.0294233
Lmbn000216	C5H8O5	3-Methylmalic acid	0.0229658	0.0181081	0.0292461
Lmhp005872	C25H30N2O6	Diferuloylcadaverine	0.0199487	-0.021104	0.0290401
pme0257	C4H4N2O2	Uracil	-0.0289083	0.00249764	0.029016
Hmgp003641	C28H32O14	Chrysoeriol-6-C-rhamnoside-7-O-rhamnoside	-0.0187074	0.0221027	0.0289568
mws0458	C8H8O3	Vanillin	-0.0107858	-0.026778	0.0288686
mws0178	C16H18O9	Chlorogenic acid (3-O-Caffeoylquinic acid)*	-0.0145253	-0.0243356	0.0283409
mws0566	C7H8O2	4-Methylcatechol	-0.0247799	0.0131642	0.0280596
NK10264324	C6H6O3	1,3,5-Benzenetriol	0.0254918	0.011697	0.0280473
pmn001505	C41H64O13	Oleanolic acid-3-O-xylosyl(1→3)glucuronide	0.0246317	0.0130485	0.0278744
pme2237	C6H14O6	Dulcitol	-0.0276506	-0.00103754	0.0276701
mws2108	C16H18O9	Cryptochlorogenic acid (4-O-Caffeoylquinic acid)	-0.0112484	-0.0250942	0.0274999
Xmyp005654	C21H20O11	Kaempferol-4'-O-glucoside	0.0232757	-0.0133206	0.0268179
mws0146	C7H7NO2	Nicotinic Acid Methyl Ester(Methyl Nicotinate)	-0.0258869	-0.00213233	0.0259746
Zmpn000095	C6H15O9P	Sorbitol-6-phosphate	0.00246265	-0.0255764	0.0256947
pme1474	C11H15N5O3S	5'-Deoxy-5'-(methylthio)adenosine	0.0246744	0.00630849	0.0254681
pme0278	C7H14N2O4	2,6-Diaminooimelic acid	0.0184305	0.017492	0.0254097
pmb0818	C11H11NO3	Methoxyindoleacetic acid	0.0221711	-0.0119593	0.025191
pmb0382	C19H14O6	O-Feruloyl 4-hydroxycoumarin	0.00942272	-0.0232378	0.0250755
mws5042	C11H14N2O3	L-Glycyl-L-phenylalanine	0.0236395	-0.00803219	0.0249668
mws0282	C11H12N2O2	L-Tryptophan	0.0225829	-0.0105821	0.0249393
Lmmp003266	C29H30O19	Quercetin-3-O-(2''-malonyl)glucoside-7-O-arabinoside	-0.023944	0.00663226	0.0248456
mws1436	C18H38O2	1,18-Octadecanediol	-0.0240458	0.00489225	0.0245384
Li512111	C24H24O13	Isorhamnetin-3-O-(6''-acetylglucoside)	-0.00279773	0.0238234	0.0239871
Wmzn000227	C6H10O4	2,2-Dimethylsuccinic acid	-0.00287258	-0.0236634	0.0238371
HJAP064	C25H24O15	Isorhamnetin-3-O-(6''-malonylglucoside)	-0.00809211	0.0220846	0.0235204
pmb1096	C8H7N	Indole	0.00968971	-0.019527	0.0217989
mws1138	C24H26N2O13	Betanin (Betanidin-5-O-glucoside)	-0.0195468	0.00780033	0.0210457
Lmsp005625	C22H18O13	3-O-Methylellagic acid-4'-O-(5''-O-acetyl)arabinoside	-0.00397317	0.0205174	0.0208985
pmn001513	C14H10O9	Digallic Acid	0.0198885	-0.00588176	0.02074
mws0437	C5H12O5	D-Arabitol	0.0188142	-0.00833013	0.0205758
mws0715	C13H16N2O4	Phenylacetyl-L-glutamine	0.0200942	-0.00335304	0.0203721
Lmbn004685	C18H32O4	5S,8R-DiHODE; (5S,8R,9Z,12Z)-5,8-Dihydroxyoctadeca-9,12-dienoate	-0.0176845	0.00822408	0.0195033
pme2761	C5H6O6	4-Hydroxy-2-oxoglutaric acid	0.0193581	0.00230459	0.0194948
pmb3072	C22H26O12	3-O-p-Coumaroylshikimic acid-O-glucoside	0.0179172	0.00755184	0.0194436
mws1013	C9H6O4	Esculetin	-0.000124971	0.018063	0.0180634
pmb2873	C13H13NO2	3-(2-Naphthyl)-L-alanine	0.0154762	-0.0083539	0.017587
pmn001367	C13H16O9	Protocatechuic acid-4-O-glucoside*	-0.0168324	0.0041287	0.0173314
NK10251888	C8H18N4O2	NG,NG-Dimethyl-L-arginine	-0.00188247	0.0167687	0.016874
pmb2871	C13H16O9	1-O-Gentisoyl-D-glucoside*	-0.0156722	0.00509201	0.0164787
HJN003	C17H22O10	1-O-Sinapoyl-D-glucose	-0.015872	-0.00338518	0.016229
mws0383	C17H32O2	10-Heptadecenoic Acid	-0.0142981	0.00537607	0.0152754
Lmrn001951	C9H10O4	(S)-2-Hydroxy-3-(4-Hydroxyphenyl)Propanoic Acid	-0.000758174	0.0110558	0.0110817
mws0214	C6H14O6	D-Sorbitol	0.00332378	0.0101404	0.0106713
pme0513	C5H12O5	Xylitol	-0.0087033	0.00454554	0.00981883
mws0341	C6H12O3	2-Hydroxyisocaproic acid	-0.00266131	0.00914604	0.00952537
